# Supplementary material for: Integrated evaluation of telomerase activation and telomere maintenance across cancer cell lines
Source: eLife. 2021 Sep 6;10:e66198. doi: 10.7554/eLife.66198 (PMC8530513; doi:10.7554/eLife.66198)
Supplement: Supplementary file 1. [file elife-66198-supp1.xlsx]

## Sheet: Merged_info
Supplementary Table S1: Merged cell line annotations
Harmonized cell line characteristics
Achilles_ID	CCLE_name	GDSC_name	COSMIC_ID	Sanger_ID	Primary_site	Age	Gender	Mutation_rate	Histology	Inferred_ethnicity	Source	Characteristics	Growth_medium	Freezing_medium	Doubling_time_from_vendor	Doubling_time_calculated_hrs	Pathologist_annotation	TCGA_code	CCLE_WGS_Telseq_raw	CCLE_WES_Telseq_raw	GDSC_WES_Telseq_raw	CCLE_WGS_Telseq_log2	CCLE_WES_Telseq_log2	GDSC_WES_Telseq_log2	GDSC_WES_Telseq_log2_corrected	CCLE_WGS_Telseq_log2_z	CCLE_WES_Telseq_log2_z	GDSC_WES_Telseq_log2_z	GDSC_WES_Telseq_log2_corrected_z	CCLE_GDSC_merged	ATRX_mutation	ATRX_mutation_classification	ATRX_protein_change	DAXX_mutation	DAXX_mutation_classification	DAXX_protein_change	TP53_mutation	TP53_mutation_classification	TP53_protein_change	VHL_mutation	VHL_mutation_classification	VHL_protein_change	IDH1_mutation	IDH1_mutation_classification	IDH1_protein_change	BRAF_mutation	BRAF_mutation_classification	BRAF_protein_change	CTC1_mutation
ACH-000534	WSUDLCL2_HAEMATOPOIETIC_AND_LYMPHOID_TISSUE	WSUDLCL2_HAEMATOPOIETIC_AND_LYMPHOID_TISSUE	1331050	SIDM00413	lymphocyte	41.0	male	100.8372372	lymphoid_neoplasm	Caucasian	DSMZ	supension	RPMI-1640 + 10% FBS	10%DMSO	nan	49.3	Lymphoma:NH_B_cell	DLBC		0.0408536	0.106033		-4.61339	-3.23741	-3.23741		1.25647	-0.0721536	0.586399	0.586399	WT	WT	WT	WT	WT	WT	chr17_7577538-7577538_C>T	other non-conserving	nan	WT	WT	WT	WT	WT	WT	WT	WT	WT	WT
ACH-000980	NCIH1155_LUNG	NCIH1155_LUNG	908467	SIDM00651	lung	36.0	male	686.7647964	carcinoma	Caucasian	ATCC	clusters in suspension	DMEM:F12	5% DMSO	nan	53.0	Lung:NSCLC_Large_Cell	nan			0.166828			-2.58357	-3.97093			0.490395	-0.198416	-0.198416	chrX_76938803-76938803_C>T	other non-conserving	p.E649K	WT	WT	WT	chr17_7577120-7577120_C>T,chr17_7578235-7578235_T>A	other non-conserving,other non-conserving	p.R273H,p.Y205F	WT	WT	WT	WT	WT	WT	WT	WT	WT	WT
ACH-000824	KYSE510_OESOPHAGUS	KYSE510_OESOPHAGUS	907321	SIDM01026	esophagus	67.0	female	200.0668926	carcinoma	Asian	GNF	nan	nan	nan	~ 30 hrs	nan	Oesophagus:Carcinoma	ESCA			0.114155			-3.13093	-4.5183			0.0194588	-0.784062	-0.784062	WT	WT	WT	WT	WT	WT	chr17_7574000-7574000_C>A	damaging	p.E343*	WT	WT	WT	WT	WT	WT	WT	WT	WT	WT
ACH-002095	CORL303_LUNG	CORL303_LUNG	1297438	SIDM00510	lung	nan	nan	nan	nan	nan	nan	nan	nan	nan	nan	nan	nan	SCLC			0.0601685			-4.05485	-4.05485			-0.775445	-0.288199	-0.288199	WT	WT	WT	WT	WT	WT	chr17_7579470-7579471_->G	damaging	p.V73fs	WT	WT	WT	WT	WT	WT	WT	WT	WT	WT
ACH-000155	SW1990_PANCREAS	SW1990_PANCREAS	910907	SIDM01165	pancreas	56.0	male	103.2181425	carcinoma	Caucasian	NIBRI	nan	nan	nan	nan	nan	Pancreas:Carcinoma	PAAD	1.14164		0.0189598	0.191105		-5.72091	-5.72091	-1.42855		-2.20887	-2.07078	-1.74967	WT	WT	WT	WT	WT	WT	chr17_7578275-7578277_GAG>-	other non-conserving	p.P191del	WT	WT	WT	WT	WT	WT	WT	WT	WT	WT
ACH-000993	JHUEM7_ENDOMETRIUM			nan	uterus	58.0	female	1638.262089	carcinoma	Asian	GNF	nan	nan	nan	nan	112.7	Endometrium:Carcinoma	UCEC		0.0476557			-4.39121				1.71386				chrX_76907720-76907720_G>A,chrX_76918876-76918876_C>A,chrX_76937311-76937311_G>T	other non-conserving,other non-conserving,other non-conserving	p.R1481W,p.R1372I,p.T1146N	chr6_33287874-33287874_T>C	other non-conserving	p.D460G	chr17_7573992-7573992_A>G,chr17_7577077-7577077_C>A,chr17_7577529-7577529_A>G,chr17_7578529-7578529_A>C,chr17_7578530-7578530_A>G,chr17_7579350-7579350_A>C	silent,other non-conserving,other non-conserving,other non-conserving,other non-conserving,other non-conserving	p.N345N,p.E287D,p.I251T,p.F134C,p.F134L,p.F113V	chr3_10191526-10191526_G>T	other non-conserving	p.E173D	WT	WT	WT	chr7_140477812-140477812_T>G	other non-conserving	p.K499T	WT
ACH-000841	NCIH2087_LUNG	NCIH2087_LUNG	724834	SIDM00708	lung	69.0	male	212.0987614	carcinoma	Caucasian	ATCC	nan	DMEM:F12 (1:1) + 10% FBS	5% DMSO	nan	104.2	Lung:NSCLC_Adeno	LUAD			0.115922			-3.10877	-4.49614			0.0385248	-0.760352	-0.760352	WT	WT	WT	WT	WT	WT	chr17_7578461-7578461_C>A	other non-conserving	p.V157F	WT	WT	WT	WT	WT	WT	chr7_140453146-140453146_G>C	other non-conserving	p.L597V	WT
ACH-001200	STM9101_SOFT_TISSUE			nan	soft_tissue	nan	nan	nan	nan	nan	nan	nan	nan	nan	nan	nan	nan	nan													WT	WT	WT	WT	WT	WT	WT	WT	WT	WT	WT	WT	WT	WT	WT	WT	WT	WT	WT
ACH-001617	OCILY7_HAEMATOPOIETIC_AND_LYMPHOID_TISSUE	OCILY7_HAEMATOPOIETIC_AND_LYMPHOID_TISSUE	1659819	SIDM00459	lymphocyte	nan	nan	nan	nan	nan	nan	nan	nan	nan	nan	nan	nan	DLBC			0.243773			-2.03639	-2.03639			0.961167	1.87141	1.87141	WT	WT	WT	WT	WT	WT	chr17_7577547-7577547_C>T	other non-conserving	p.G245D	WT	WT	WT	chr2_209116217-209116217_C>T	other non-conserving	p.R20Q	WT	WT	WT	WT
ACH-000077	MJ_HAEMATOPOIETIC_AND_LYMPHOID_TISSUE			nan	lymphocyte	50.0	male	83.34526686	lymphoid_neoplasm	Caucasian	NIBRI	nan	nan	nan	nan	nan	Lymphoma:NH_T_cell	nan		0.0268466			-5.21912				0.00953799				WT	WT	WT	WT	WT	WT	WT	WT	WT	WT	WT	WT	WT	WT	WT	WT	WT	WT	WT
ACH-000575	HCC364_LUNG			nan	lung	nan	nan	125.3439438	carcinoma	Caucasian	nan	nan	nan	nan	nan	nan	nan	nan													WT	WT	WT	WT	WT	WT	chr17_7578392-7578392_C>T	other non-conserving	p.E180K	WT	WT	WT	WT	WT	WT	chr7_140453136-140453136_A>T	other non-conserving	p.V600E	WT
ACH-001399	SW626_LARGE_INTESTINE	SW626_OVARY	909753	SIDM01168	colorectal	nan	nan	nan	nan	nan	nan	nan	nan	nan	nan	nan	nan	COAD/READ			0.0950986			-3.39443	-3.39443			-0.207246	0.418401	0.418401	WT	WT	WT	WT	WT	WT	chr17_7577153-7577153_C>A	other non-conserving	p.G262V	WT	WT	WT	WT	WT	WT	WT	WT	WT	WT
ACH-002213	BB49HNC_UPPER_AERODIGESTIVE_TRACT	BB49HNC_UPPER_AERODIGESTIVE_TRACT	753532	SIDM00174	upper_aerodigestive	nan	nan	nan	nan	nan	nan	nan	nan	nan	nan	nan	nan	HNSC			0.0440665			-4.50417	-4.50417			-1.16203	-0.768948	-0.768948	WT	WT	WT	WT	WT	WT	WT	WT	WT	WT	WT	WT	WT	WT	WT	WT	WT	WT	WT
ACH-000662	CORL23_LUNG	CORL23_LUNG	687780	SIDM00512	lung	62.0	male	137.3378769	carcinoma	Caucasian	ECAAC	adherent	RPMI 1640 + 10%FBS	5% DMSO	nan	33.4	Lung:NSCLC_Large_Cell	nan	1.00888		0.149418	0.0127487		-2.74257	-4.12994	-1.61403		0.35359	-0.368543	-0.991285	chrX_76952186-76952186_A>C	silent	p.P83P	WT	WT	WT	WT	WT	WT	WT	WT	WT	WT	WT	WT	WT	WT	WT	WT
ACH-002239	H3118_UPPER_AERODIGESTIVE_TRACT	H3118_UPPER_AERODIGESTIVE_TRACT	1240140	SIDM00517	upper_aerodigestive	nan	nan	nan	nan	nan	nan	nan	nan	nan	nan	nan	nan	HNSC			0.0533572			-4.22817	-4.22817			-0.924568	-0.473646	-0.473646	WT	WT	WT	WT	WT	WT	chr17_7578212-7578212_G>A	damaging	p.R213*	WT	WT	WT	WT	WT	WT	WT	WT	WT	WT
ACH-001856	RBE_BILIARY_TRACT			nan	bile_duct																										WT	WT	WT	WT	WT	WT	WT	WT	WT	WT	WT	WT	chr2_209113113-209113113_G>T	other non-conserving	p.R132S	WT	WT	WT	WT
ACH-000152	M059K_CENTRAL_NERVOUS_SYSTEM			SIDM00639	central_nervous_system	33.0	male	86.55945863	glioma	Caucasian	ATCC	adherent fibroblast	DMEM:F12 +10% FBS	5% DMSO	nan	164.5	CNS:Glioma_HighGrade	GBM													WT	WT	WT	WT	WT	WT	chr17_7577082-7577082_C>T	other non-conserving	p.E286K	WT	WT	WT	WT	WT	WT	WT	WT	WT	WT
ACH-001395	SUM44PE_BREAST			nan	breast																										WT	WT	WT	WT	WT	WT	chr17_7579706-7579707_->T,chr17_7579714-7579714_C>G	damaging,other non-conserving	p.N30fs,p.E28Q	WT	WT	WT	WT	WT	WT	WT	WT	WT	chr17_8141926-8141926_G>C
ACH-000378	NCIH647_LUNG	NCIH647_LUNG	1240191	SIDM01125	lung	56.0	male	113.2413473	carcinoma	Caucasian	ATCC	Adherent	RPMI-1640+10% FBS	5%DMSO	nan	68.6	Lung:NSCLC_Adeno	LUAD			0.153358			-2.70502	-4.09239			0.385897	-0.328368	-0.328368	WT	WT	WT	WT	WT	WT	chr17_7577498-7577498_C>A	damaging	nan	WT	WT	WT	WT	WT	WT	WT	WT	WT	WT
ACH-000478	SNU387_LIVER	SNU387_LIVER	909736	SIDM01180	liver	41.0	female	144.2324724	carcinoma	Asian	ATCC	adherent epithelial	RPMI-1640 + 10% FBS	5%DMSO	nan	87.0	Liver:HCC	LIHC	24.8402		1.2368	4.63461		0.306612	-1.08075	3.19222		2.97701	2.89388	3.04305	WT	WT	WT	WT	WT	WT	chr17_7578440-7578440_T>A	damaging	p.K164*	WT	WT	WT	WT	WT	WT	WT	WT	WT	WT
ACH-001999	9505BIK_PANCREAS			nan	pancreas																										WT	WT	WT	WT	WT	WT	chr17_7577121-7577121_G>A	other non-conserving	p.R273C	WT	WT	WT	WT	WT	WT	WT	WT	WT	WT
ACH-000047	GCIY_STOMACH	GCIY_STOMACH	906869	SIDM00274	gastric	nan	female	88.66578456	carcinoma	Asian	GNF	nan	nan	nan	nan	nan	Gastric:Carcinoma	STAD	9.95569		0.433515	3.31552		-1.20585	-2.59321	1.82051		1.67574	1.27565	1.54808	WT	WT	WT	WT	WT	WT	chr17_7578393-7578393_A>C,chr17_7579882-7579882_C>G	other non-conserving,other non-conserving	p.H179Q,p.E11Q	WT	WT	WT	WT	WT	WT	WT	WT	WT	WT
ACH-002382	HCC1395_MATCHED_NORMAL_TISSUE	HCC1395_Matched_Normal_Tissue		SIDM00883	non_cancerous																0.0282682			-5.14468	-5.14468			-1.7131	-1.45424	-1.45424	WT	WT	WT	WT	WT	WT	WT	WT	WT	WT	WT	WT	WT	WT	WT	WT	WT	WT	WT
ACH-000449	MESSA_SOFT_TISSUE	MESSA_SOFT_TISSUE	908127	SIDM00625	soft_tissue	56.0	female	121.3182747	sarcoma	Caucasian	ATCC	Fibroblast adherent	McCoy's 5A + 10%FBS	5%DMSO	nan	35.3	Soft_Tissue:Sarcoma_Others	SARC			0.129647			-2.94734	-2.94734			0.177418	0.89676	0.89676	WT	WT	WT	WT	WT	WT	WT	WT	WT	WT	WT	WT	WT	WT	WT	WT	WT	WT	WT
ACH-000609	SF126_CENTRAL_NERVOUS_SYSTEM	SF126_CENTRAL_NERVOUS_SYSTEM	909712	SIDM00382	central_nervous_system	nan	nan	136.2988662	glioma	Caucasian	HSSRB	fibroblast-like	Eagle's minimal essential medium with 10% fetal bovine serum	nan	nan	nan	CNS:Glioma	GBM			0.192542			-2.37675	-3.76412			0.668329	0.0228587	0.0228587	WT	WT	WT	WT	WT	WT	WT	WT	WT	WT	WT	WT	WT	WT	WT	WT	WT	WT	WT
ACH-001211	TTC549_SOFT_TISSUE			nan	soft_tissue	nan	nan	nan	nan	nan	nan	nan	nan	nan	nan	nan	nan	nan													WT	WT	WT	WT	WT	WT	WT	WT	WT	WT	WT	WT	WT	WT	WT	WT	WT	WT	WT
ACH-002200	SW962_VULVA	SW962_VULVA	909758	SIDM01178	skin	nan	nan	nan	nan	nan	nan	nan	nan	nan	nan	nan	nan	nan			0.122732			-3.02642	-3.02642			0.109382	0.812153	0.812153	WT	WT	WT	WT	WT	WT	chr17_7577141-7577141_C>A,chr17_7578475-7578475_G>A	other non-conserving,other non-conserving	p.G266V,p.P152L	WT	WT	WT	WT	WT	WT	WT	WT	WT	WT
ACH-002293	P32ISH_HAEMATOPOIETIC_AND_LYMPHOID_TISSUE	P32ISH_HAEMATOPOIETIC_AND_LYMPHOID_TISSUE	1330987	SIDM00362	lymphoma	nan	nan	nan	nan	nan	nan	nan	nan	nan	nan	nan	nan	nan			0.504789			-0.986248	-2.37361			1.86467	1.51061	1.51061	WT	WT	WT	WT	WT	WT	chr17_7577568-7577568_C>A	other non-conserving	p.C238F	WT	WT	WT	WT	WT	WT	WT	WT	WT	WT
ACH-001041	COLO699_LUNG			SIDM00911	lung	57.0	female	nan	carcinoma	Caucasian	DSMZ	Adherent, epitheloid cells growing in monolayers	90% RPMI 1640 + 10% h.i.FBS	nan	~38 hrs	nan	Lung:NSCLC_Adeno	LUAD													WT	WT	WT	WT	WT	WT	chr17_7577538-7577538_C>T	other non-conserving	nan	WT	WT	WT	WT	WT	WT	WT	WT	WT	WT
ACH-000471	LI7_LIVER			nan	liver	nan	nan	139.1518781	carcinoma	Asian	RIKEN	epithelial-like	RPMI 1640 +10%FBS	nan	nan	nan	Liver:HCC	LIHC		0.0303962			-5.03997				0.378335				WT	WT	WT	WT	WT	WT	WT	WT	WT	WT	WT	WT	WT	WT	WT	WT	WT	WT	WT
ACH-000781	NCIH2023_LUNG	NCIH2023_LUNG	1240187	SIDM00753	lung	26.0	male	183.4098616	carcinoma	Caucasian	ATCC	adherent	DMEM:HAM's F12 1:1 + 5 % FBS	5% DMSO	nan	nan	Lung:NSCLC_Adeno	LUAD			0.150528			-2.7319	-4.11926			0.362777	-0.357119	-0.357119	WT	WT	WT	WT	WT	WT	chr17_7577561-7577561_A>T	other non-conserving	p.S240R	WT	WT	WT	WT	WT	WT	WT	WT	WT	WT
ACH-000171	VMRCRCZ_KIDNEY	VMRCRCZ_KIDNEY	909781	SIDM00317	kidney	nan	nan	84.80017445	carcinoma	Caucasian	HSRRB	Adherent	EMEM + 10% FBS	5%DMSO	nan	73.6	Kidney:Carcinoma	KIRC			0.0582432			-4.10177	-4.10177			-0.815812	-0.338399	-0.338399	WT	WT	WT	WT	WT	WT	chr17_7578466-7578466_G>A,chr17_7579541-7579544_TCGT>-	other non-conserving,damaging	p.T155I,p.DD48fs	chr3_10188322-10188322_T>C	damaging	nan	WT	WT	WT	WT	WT	WT	WT
ACH-002359		LB996EBV_Matched_Normal_Tissue			non_cancerous																0.136625			-2.87171	-2.87171			0.242489	0.977682	0.977682
ACH-002287	NCIH630_LARGE_INTESTINE	NCIH630_LARGE_INTESTINE	908482	nan	colorectal	nan	nan	nan	nan	nan	nan	nan	nan	nan	nan	nan	nan	COAD/READ			0.0981565			-3.34877	-3.34877			-0.167962	0.467254	0.467254	WT	WT	WT	WT	WT	WT	chr17_7574003-7574003_G>A	damaging	p.R342*	WT	WT	WT	WT	WT	WT	WT	WT	WT	chr17_8134758-8134758_T>C
ACH-000275	HS834T_FIBROBLAST			nan	fibroblast	nan	nan	86.93934853	malignant_melanoma	Caucasian	nan	large adherent cells	DEMEM+10%fbs	5%DMSO	nan	nan	nan	nan		0.0316			-4.98393				0.493685				WT	WT	WT	WT	WT	WT	WT	WT	WT	WT	WT	WT	WT	WT	WT	WT	WT	WT	WT
ACH-002096	CP50MELB_SKIN	CP50MELB_SKIN	753545	SIDM00175	skin	nan	nan	nan	nan	nan	nan	nan	nan	nan	nan	nan	nan	SKCM			0.249021			-2.00566	-3.39303			0.987606	0.419905	0.419905	WT	WT	WT	chr6_33289143-33289143_G>A	other non-conserving	p.H137Y	WT	WT	WT	WT	WT	WT	WT	WT	WT	chr7_140453136-140453136_A>T	other non-conserving	p.V600E	chr17_8133778-8133778_C>T
ACH-000523	NCIH1184_LUNG			nan	lung	42.0	male	134.1563317	carcinoma	Caucasian	ATCC	Mixed (lymphoblasts)	RPMI-1640 + 10% FBS	5%DMSO	nan	151.7	Lung:SCLC	SCLC	12.2548	0.0393935		3.61528	-4.6659			2.13222	1.14839			2.13222	WT	WT	WT	WT	WT	WT	chr17_7574026-7574026_C>A	other non-conserving	p.G334V	WT	WT	WT	WT	WT	WT	WT	WT	WT	WT
ACH-001745	RHJT_SOFT_TISSUE			nan	soft_tissue																										WT	WT	WT	WT	WT	WT	chr17_7579312-7579312_C>A	damaging	p.T125T	WT	WT	WT	WT	WT	WT	WT	WT	WT	WT
ACH-001648	SHMAC4_PROSTATE			nan	prostate																										WT	WT	WT	WT	WT	WT	WT	WT	WT	WT	WT	WT	WT	WT	WT	WT	WT	WT	WT
ACH-000297	NCIH889_LUNG			nan	lung	69.0	female	104.78704549999999	carcinoma	Caucasian	ATCC	clusters in suspension	RPMI-1640+10%FBS	5% DMSO	nan	nan	Lung:SCLC	SCLC	2.70209	0.0323163		1.43407	-4.9516			-0.135998	0.560255			-0.135998	WT	WT	WT	WT	WT	WT	chr17_7577556-7577556_C>G	other non-conserving	p.C242S	WT	WT	WT	WT	WT	WT	WT	WT	WT	WT
ACH-001382	PACADD188_PANCREAS			nan	pancreas																										WT	WT	WT	WT	WT	WT	chr17_7576868-7576869_->TC	damaging	p.E326fs	WT	WT	WT	WT	WT	WT	WT	WT	WT	WT
ACH-002388	MET2B_SKIN			SIDM00221	skin																										WT	WT	WT	WT	WT	WT	WT	WT	WT	WT	WT	WT	WT	WT	WT	WT	WT	WT	WT
ACH-001703	VAL_HAEMATOPOIETIC_AND_LYMPHOID_TISSUE	VAL_HAEMATOPOIETIC_AND_LYMPHOID_TISSUE	1331048	SIDM00416	lymphocyte	nan	nan	nan	nan	nan	nan	nan	nan	nan	nan	nan	nan	DLBC			0.0840252			-3.57303	-3.57303			-0.360909	0.227309	0.227309	WT	WT	WT	WT	WT	WT	WT	WT	WT	WT	WT	WT	WT	WT	WT	WT	WT	WT	WT
ACH-000995	JURKAT_HAEMATOPOIETIC_AND_LYMPHOID_TISSUE	JURKAT_HAEMATOPOIETIC_AND_LYMPHOID_TISSUE	998184	SIDM01016	blood	14.0	male	1452.954999	lymphoid_neoplasm	Caucasian	DSMZ	round cells growing singly or in clumps in suspention	90% RPMI 1640 +10% h.i.FBS	nan	~ 25-35 hrs	nan	Leukemia:ALL	ALL		0.0216635	0.128144		-5.52859	-2.96416	-2.96416		-0.627535	0.162944	0.878761	0.878761	WT	WT	WT	chr6_33286850-33286850_C>T	other non-conserving	p.S696N	chr17_7578263-7578263_G>A,chr17_7579312-7579312_C>T	damaging,damaging	p.R196*,p.T125T	WT	WT	WT	WT	WT	WT	chr7_140434515-140434515_G>A	other non-conserving	p.A728V	chr17_8135424-8135424_C>T,chr17_8135681-8135681_G>A,chr17_8139602-8139602_G>A
ACH-000975	HCC2450_LUNG			nan	lung	nan	nan	nan	nan	nan	nan	nan	nan	nan	nan	nan	nan	nan													chrX_76855996-76855996_T>G,chrX_76953100-76953100_G>C	silent,silent	p.A1868A,p.S71S	WT	WT	WT	chr17_7577535-7577535_C>G	other non-conserving	p.R249T	WT	WT	WT	WT	WT	WT	WT	WT	WT	WT
ACH-001134	MYLA_HAEMATOPOIETIC_AND_LYMPHOID_TISSUE			nan	lymphocyte																										WT	WT	WT	WT	WT	WT	WT	WT	WT	WT	WT	WT	WT	WT	WT	WT	WT	WT	WT
ACH-002209	ALLPO_HAEMATOPOIETIC_AND_LYMPHOID_TISSUE	ALLPO_HAEMATOPOIETIC_AND_LYMPHOID_TISSUE	910944	SIDM00211	leukemia	nan	nan	nan	nan	nan	nan	nan	nan	nan	nan	nan	nan	ALL			0.0477998			-4.38685	-4.38685			-1.06109	-0.643421	-0.643421	WT	WT	WT	WT	WT	WT	chr17_7577538-7577538_C>T	other non-conserving	nan	WT	WT	WT	WT	WT	WT	WT	WT	WT	WT
ACH-002099	CS1_BONE	CS1_BONE	1290795	SIDM00199	bone	nan	nan	nan	nan	nan	nan	nan	nan	nan	nan	nan	nan	nan			0.153376			-2.70486	-2.70486			0.386042	1.1562	1.1562	WT	WT	WT	WT	WT	WT	chr17_7577547-7577547_C>T	other non-conserving	p.G245D	WT	WT	WT	WT	WT	WT	WT	WT	WT	WT
ACH-001384	RO82W1_THYROID	RO82W1_THYROID	930083	SIDM00218	thyroid	nan	nan	nan	nan	nan	nan	nan	nan	nan	nan	nan	nan	THCA			0.0507878			-4.29937	-4.29937			-0.985827	-0.549826	-0.549826	WT	WT	WT	WT	WT	WT	chr17_7578181-7578181_G>A	other non-conserving	p.P223L	WT	WT	WT	WT	WT	WT	WT	WT	WT	WT
ACH-001655	SKN_ENDOMETRIUM	SKN_URINARY_TRACT	1240215	SIDM00377	uterus	nan	nan	nan	nan	nan	nan	nan	nan	nan	nan	nan	nan	nan			0.0623293			-4.00395	-4.00395			-0.731651	-0.233737	-0.233737	WT	WT	WT	WT	WT	WT	chr17_7577556-7577556_C>A	other non-conserving	p.C242F	WT	WT	WT	WT	WT	WT	WT	WT	WT	WT
ACH-001360	MS751_CERVIX	MS751_CERVIX	1240179	SIDM00638	cervix	nan	nan	nan	nan	nan	nan	nan	nan	nan	nan	nan	nan	CESC			0.10796			-3.21143	-4.5988			-0.0497982	-0.870189	-0.870189	WT	WT	WT	WT	WT	WT	WT	WT	WT	WT	WT	WT	WT	WT	WT	WT	WT	WT	WT
ACH-000249	CL11_LARGE_INTESTINE	CL11_LARGE_INTESTINE	1290769	SIDM00944	colorectal	nan	nan	94.32458717	carcinoma	Caucasian	DSMZ	adherent epitheloid cells growing in monolayers and forming islets	80% mixture of Ham's F12 + Dulbecco's MEM (at 1:1) +20% h.i FBS	10%DMSO	~ 3-4 days	98.8	Colorectal:Carcinoma	COAD/READ		0.0278035	0.0490294		-5.16859	-4.35021	-4.35021		0.113552	-1.02956	-0.604216	-0.604216	WT	WT	WT	WT	WT	WT	chr17_7578205-7578205_C>T	other non-conserving	p.S215N	WT	WT	WT	WT	WT	WT	WT	WT	WT	WT
ACH-001819	MFM223_BREAST	MFM223_BREAST		SIDM00332	breast	nan	nan	nan	nan	nan	nan	nan	nan	nan	nan	nan	nan	BRCA			0.121707			-3.03852	-4.42588			0.0989722	-0.685181	-0.685181	WT	WT	WT	WT	WT	WT	chr17_7578535-7578535_T>C	other non-conserving	p.K132R	WT	WT	WT	WT	WT	WT	chr7_140549983-140549983_C>T	silent	p.L56L	WT
ACH-000744	NCIH1623_LUNG	NCIH1623_LUNG	687798	SIDM00747	lung	58.0	male	154.9801859	carcinoma	Caucasian	ATCC	Adherent, single cells and clusters loosely attached	RPMI 1640+10%FBS	5%DMSO	nan	189.6	Lung:NSCLC_Adeno	LUAD			0.0836833			-3.57892	-4.96628			-0.36597	-1.26337	-1.26337	WT	WT	WT	WT	WT	WT	chr17_7577120-7577120_C>A,chr17_7579580-7579581_GG>AA,chr17_7579581-7579581_G>A	other non-conserving,other non-conserving,other non-conserving	p.R273L,p.P36L,p.P36S	WT	WT	WT	WT	WT	WT	WT	WT	WT	WT
ACH-000678	MKN7_STOMACH	MKN7_STOMACH	924250	SIDM00560	gastric	39.0	male	163.7412888	carcinoma	Asian	GNF	nan	nan	nan	nan	nan	Gastric:Carcinoma	STAD	1.6738		0.0908778	0.74313		-3.45993	-4.84729	-0.854507		-0.263597	-1.13606	-0.995285	chrX_76939673-76939674_->T	damaging	p.L359fs	chr6_33287897-33287897_T>C	silent	p.E452E	chr17_7577106-7577106_G>A	other non-conserving	p.P278S	WT	WT	WT	WT	WT	WT	WT	WT	WT	WT
ACH-000624	HCC1806_BREAST	HCC1806_BREAST	907047	SIDM00875	breast	60.0	female	134.93052169999999	carcinoma	African_american	NIBRI	nan	nan	nan	nan	nan	Breast:Carcinoma	BRCA			0.490038			-1.02903	-2.4164			1.82786	1.46483	1.46483	WT	WT	WT	WT	WT	WT	chr17_7577514-7577515_->TT	damaging	p.T256fs	WT	WT	WT	WT	WT	WT	WT	WT	WT	WT
ACH-001451	BOKU_CERVIX			SIDM00073	cervix																										WT	WT	WT	WT	WT	WT	WT	WT	WT	WT	WT	WT	WT	WT	WT	WT	WT	WT	WT
ACH-000673	LN443_CENTRAL_NERVOUS_SYSTEM			nan	central_nervous_system	nan	male	160.7552819	glioma	Caucasian	nan	nan	nan	nan	nan	nan	nan	nan													WT	WT	WT	WT	WT	WT	chr17_7578208-7578208_T>C	other non-conserving	p.H214R	WT	WT	WT	WT	WT	WT	WT	WT	WT	WT
ACH-002247	IM9_HAEMATOPOIETIC_AND_LYMPHOID_TISSUE	IM9_HAEMATOPOIETIC_AND_LYMPHOID_TISSUE	753563	SIDM00632	non_cancerous	nan	nan	nan	nan	nan	nan	nan	nan	nan	nan	nan	nan	MM			0.0372598			-4.74624	-4.74624			-1.37029	-1.02794	-1.02794	WT	WT	WT	WT	WT	WT	WT	WT	WT	WT	WT	WT	WT	WT	WT	WT	WT	WT	WT
ACH-000231	KALS1_CENTRAL_NERVOUS_SYSTEM	KALS1_CENTRAL_NERVOUS_SYSTEM	907271	SIDM00613	central_nervous_system	nan	female	129.4083436	glioma	Asian	HSSRB	Biporar polyglonal	RPMI1640+10%FBS	10%DMSO	nan	56.9	CNS:Glioma	LGG	1.54551		0.0844978	0.62808		-3.56494	-4.95231	-0.974147		-0.353947	-1.24842	-1.11128	WT	WT	WT	WT	WT	WT	chr17_7577559-7577559_G>A	other non-conserving	p.S241F	WT	WT	WT	WT	WT	WT	WT	WT	WT	WT
ACH-001498	FARAGE_HAEMATOPOIETIC_AND_LYMPHOID_TISSUE	FARAGE_HAEMATOPOIETIC_AND_LYMPHOID_TISSUE	1297449	SIDM00859	lymphocyte	nan	nan	nan	nan	nan	nan	nan	nan	nan	nan	nan	nan	DLBC			0.0899956			-3.474	-3.474			-0.275705	0.333267	0.333267	WT	WT	WT	WT	WT	WT	chr17_7577539-7577539_G>A	other non-conserving	p.R248W	WT	WT	WT	WT	WT	WT	WT	WT	WT	WT
ACH-000589	NCIH1437_LUNG	NCIH1437_LUNG	687794	SIDM00734	lung	6.0	male	126.20806609999998	carcinoma	Caucasian	ATCC	Adherent	RPMI+10%FBS	5% DMSO	nan	48.6	Lung:NSCLC_Adeno	LUAD	2.05554		0.122855	1.03952		-3.02497	-4.41234	-0.546293		0.110625	-0.670689	-0.608491	WT	WT	WT	WT	WT	WT	chr17_7577138-7577138_C>G	other non-conserving	p.R267P	WT	WT	WT	WT	WT	WT	WT	WT	WT	WT
ACH-000203	NH6_AUTONOMIC_GANGLIA			nan	peripheral_nervous_system	0.75	female	115.60767150000001	neuroblastoma	Asian	HSSRB	fibroblast-like	alpha-MEM with 10% fetal calf serum	nan	nan	nan	PNET:Neuroblastoma	NB		0.0280941			-5.15359				0.144436				WT	WT	WT	WT	WT	WT	WT	WT	WT	WT	WT	WT	WT	WT	WT	WT	WT	WT	WT
ACH-000838	AMO1_HAEMATOPOIETIC_AND_LYMPHOID_TISSUE	AMO1_HAEMATOPOIETIC_AND_LYMPHOID_TISSUE	1295741	SIDM00993	plasma_cell	64.0	female	237.22330130000003	lymphoid_neoplasm	Asian	DSMZ	single suspension	RPMI-1640+20% FBS	5% DMSO	50-90hrs	57.8	Lymphoma:Multiple_Myeloma	MM		0.0199545	0.0314563		-5.64714	-4.99051	-4.99051		-0.871583	-1.58045	-1.28929	-1.28929	WT	WT	WT	WT	WT	WT	WT	WT	WT	WT	WT	WT	WT	WT	WT	WT	WT	WT	WT
ACH-000487	F36P_HAEMATOPOIETIC_AND_LYMPHOID_TISSUE			nan	blood	68.0	male	167.7509478	haematopoietic_neoplasm	Asian	DSMZ	polymorph cells growing as adherent cells and singly in suspention	80% RPMI 1640 + 10% h.i.FBS	nan	~ 24-36 hrs	nan	Leukemia:AML	LAML		0.0430183			-4.53891				1.40981				WT	WT	WT	WT	WT	WT	chr17_7578555-7578555_C>T	damaging	nan	WT	WT	WT	WT	WT	WT	WT	WT	WT	WT
ACH-002223	D245MG_CENTRAL_NERVOUS_SYSTEM	D245MG_CENTRAL_NERVOUS_SYSTEM	946366	SIDM01021	central_nervous_system	nan	nan	nan	nan	nan	nan	nan	nan	nan	nan	nan	nan	GBM			0.0790303			-3.66145	-3.66145			-0.436979	0.13271	0.13271	WT	WT	WT	WT	WT	WT	WT	WT	WT	WT	WT	WT	WT	WT	WT	WT	WT	WT	WT
ACH-002391	UDSCC2_UPPER_AERODIGESTIVE_TRACT			SIDM00025	upper_aerodigestive	nan	nan	nan	nan	nan	nan	nan	nan	nan	nan	nan	nan	HNSC													WT	WT	WT	WT	WT	WT	WT	WT	WT	WT	WT	WT	WT	WT	WT	WT	WT	WT	WT
ACH-000445	KNS60_CENTRAL_NERVOUS_SYSTEM			nan	central_nervous_system	55.0	male	142.794309	glioma	Asian	HSSRB	polygonal-epithelial	Dulbecco's modified Eagle's medium with 5% fetal bovine serum	nan	nan	nan	CNS:Glioma_HighGrade	GBM		0.0322185			-4.95596				0.551259				WT	WT	WT	WT	WT	WT	chr17_7578272-7578272_G>A	other non-conserving	p.H193Y	WT	WT	WT	WT	WT	WT	WT	WT	WT	WT
ACH-000745	MOLP8_HAEMATOPOIETIC_AND_LYMPHOID_TISSUE	MOLP8_HAEMATOPOIETIC_AND_LYMPHOID_TISSUE	1330950	SIDM00434	plasma_cell	52.0	male	211.68898330000002	lymphoid_neoplasm	Asian	DSMZ	single round cells in suspention, some cells loosely adherent	80% RPMI 1640 + 20% h. i. FBS	nan	~ 40 hrs	nan	Lymphoma:Multiple_Myeloma	MM		0.0211478	0.0599022		-5.56335	-4.06125	-4.06125		-0.699088	-0.780951	-0.295046	-0.295046	WT	WT	WT	WT	WT	WT	WT	WT	WT	WT	WT	WT	WT	WT	WT	WT	WT	WT	WT
ACH-000847	HGC27_STOMACH	HGC27_STOMACH	907055	SIDM00290	gastric	nan	nan	247.10072259999998	carcinoma	Asian	GNF	nan	nan	nan	nan	nan	Gastric:Carcinoma	STAD	8.24616		0.373685	3.04372		-1.42011	-2.80747	1.53787		1.4914	1.04641	1.29214	WT	WT	WT	WT	WT	WT	chr17_7578474-7578475_->G	damaging	p.P152fs	WT	WT	WT	WT	WT	WT	WT	WT	WT	WT
ACH-000961	ISHIKAWAHERAKLIO02ER_ENDOMETRIUM	ISHIKAWAHERAKLIO02ER_ENDOMETRIUM		SIDM00037	uterus	39.0	female	659.2084687000001	carcinoma	Asian	nan	nan	nan	nan	nan	nan	Endometrium:Carcinoma	UCEC	4.92498		0.114426	2.30012		-3.12751	-3.12751	0.764596		0.022402	0.703986	0.734291	chrX_76918975-76918975_C>A	other non-conserving	p.R1339M	chr6_33288735-33288735_G>A	other non-conserving	p.R273W	chr17_7577545-7577545_T>C,chr17_7579542-7579542_C>G	other non-conserving,other non-conserving	p.M246V,p.D49H	WT	WT	WT	chr2_209116262-209116263_->T	damaging	p.I5fs	chr7_140482927-140482927_G>-	damaging	p.P403fs	chr17_8132045-8132045_C>A
ACH-001441	921_UVEA			nan	eye																										WT	WT	WT	WT	WT	WT	WT	WT	WT	WT	WT	WT	WT	WT	WT	WT	WT	WT	WT
ACH-000776	ONS76_CENTRAL_NERVOUS_SYSTEM	ONS76_CENTRAL_NERVOUS_SYSTEM	909248	SIDM00567	central_nervous_system	2.0	female	222.6179875	primitive_neuroectodermal_tumour-medulloblastoma	Asian	HSSRB	epithelial-like	RPMI 1640 medium with 10% fetal bovine serum	nan	nan	nan	CNS:Medulloblastoma	MB	1.47372		0.155029	0.559465		-2.68939	-4.07676	-1.0455		0.399348	-0.31164	-0.678569	WT	WT	WT	WT	WT	WT	WT	WT	WT	WT	WT	WT	WT	WT	WT	WT	WT	WT	WT
ACH-000472	HSC2_UPPER_AERODIGESTIVE_TRACT	HSC2_UPPER_AERODIGESTIVE_TRACT	753562	SIDM00590	upper_aerodigestive	69.0	male	155.9651961	carcinoma	Asian	HSSRB	Epithelial-like	EMEM+10%FBS	nan	nan	37.7	Upper_Aerodigestive_Tract:Carcinoma	HNSC			0.0499078			-4.32459	-4.32459			-1.00752	-0.576806	-0.576806	WT	WT	WT	WT	WT	WT	chr17_7578176-7578176_C>T	damaging	nan	WT	WT	WT	WT	WT	WT	WT	WT	WT	WT
ACH-001850	G415_BILIARY_TRACT			nan	bile_duct																										WT	WT	WT	WT	WT	WT	WT	WT	WT	WT	WT	WT	WT	WT	WT	WT	WT	WT	WT
ACH-000971	HCT116_LARGE_INTESTINE	HCT116_LARGE_INTESTINE	905936	SIDM00783	colorectal	nan	male	726.558281	carcinoma	Caucasian	NIBRI	nan	nan	nan	nan	nan	Colorectal:Carcinoma	COAD/READ	4.7023		0.22448	2.23337		-2.15534	-3.54271	0.695183		0.858826	0.259756	0.47747	chrX_76891517-76891519_TGG>-	other non-conserving	p.T1529del	WT	WT	WT	WT	WT	WT	WT	WT	WT	chr2_209106786-209106786_G>A	other non-conserving	p.S261L	chr7_140439741-140439741_A>G,chr7_140500239-140500239_T>C	silent,silent	p.I666I,p.P301P	chr17_8141873-8141873_G>A
ACH-000657	A2780_OVARY	A2780_OVARY	906804	SIDM00210	ovary	nan	female	206.5489916	carcinoma	African_american	NIBRI	Monolayer and suspension	RPMI1640+10%FBS	nan	nan	73.3	Ovary:Carcinoma	UNABLE TO CLASSIFY	3.57786		0.158599	1.8391		-2.65654	-4.04391	0.285182		0.427607	-0.276497	0.00434219	WT	WT	WT	chr6_33287936-33287936_G>A	silent	p.D439D	WT	WT	WT	WT	WT	WT	chr2_209116262-209116263_->T	damaging	p.I5fs	chr7_140507795-140507795_C>T	other non-conserving	p.V226M	WT
ACH-000364	U2OS_BONE	U2OS_BONE	909776	SIDM01191	bone	15.0	female	103.6905353	osteosarcoma	Caucasian	ATCC	Adherent	McCoy's 5A +10%FBS	5% DMSO	nan	nan	Bone:Sarcoma_Osteo	SARC	20.9473		8.01672	4.38869		3.00301	1.61565	2.93649		5.2969	5.77885	4.35767	WT	WT	WT	WT	WT	WT	WT	WT	WT	WT	WT	WT	WT	WT	WT	WT	WT	WT	WT
ACH-000038	EHEB_HAEMATOPOIETIC_AND_LYMPHOID_TISSUE	EHEB_HAEMATOPOIETIC_AND_LYMPHOID_TISSUE	906854	SIDM01049	non_cancerous	69.0	female	59.02873727	lymphoid_neoplasm	Caucasian	DSMZ	lymphoblastoid, round to polygonal, single or clustered cells in suspention	90% RPMI 1640 +10% h.i.FBS	nan	~ 50-70 hrs	176.0	Leukemia:CLL	CLL			0.167171			-2.5806	-2.5806			0.492944	1.28914	1.28914	chrX_76939673-76939674_->T	damaging	p.L359fs	WT	WT	WT	WT	WT	WT	WT	WT	WT	WT	WT	WT	WT	WT	WT	WT
ACH-000430	TYKNU_OVARY	TYKNU_OVARY	909774	SIDM00321	ovary	nan	female	169.39891780000002	carcinoma	Asian	NIBRI	nan	nan	nan	nan	nan	Ovary:Carcinoma	UNABLE TO CLASSIFY		0.0267095	0.0284212		-5.2265	-5.13689	-5.13689		-0.00566226	-1.7064	-1.44591	-1.44591	chrX_76776298-76776298_T>C	other non-conserving	p.I2390V	WT	WT	WT	chr17_7578406-7578406_C>T	other non-conserving	p.R175H	WT	WT	WT	WT	WT	WT	WT	WT	WT	WT
ACH-000303	SNU5_STOMACH	SNU5_STOMACH	908445	SIDM01144	gastric	33.0	female	147.8163642	carcinoma	Asian	NIBRI	nan	nan	nan	nan	nan	Gastric:Carcinoma	STAD			0.0851625			-3.55364	-4.941			-0.344221	-1.23633	-1.23633	chrX_76937102-76937102_T>C	other non-conserving	p.I1216V	WT	WT	WT	chr17_7577157-7577157_T>G	damaging	nan	WT	WT	WT	WT	WT	WT	WT	WT	WT	WT
ACH-000057	OPM1_HAEMATOPOIETIC_AND_LYMPHOID_TISSUE			SIDM00456	plasma_cell	nan	nan	nan	nan	nan	nan	nan	nan	nan	nan	nan	nan	MM													WT	WT	WT	WT	WT	WT	chr17_7578406-7578406_C>T	other non-conserving	p.R175H	WT	WT	WT	WT	WT	WT	WT	WT	WT	chr17_8132749-8132749_G>A
ACH-001591	NCIH1417_LUNG	NCIH1417_LUNG	688001	SIDM00642	lung	nan	nan	nan	nan	nan	nan	nan	nan	nan	nan	nan	nan	SCLC			0.177374			-2.49513	-2.49513			0.56648	1.38059	1.38059	WT	WT	WT	WT	WT	WT	chr17_7578406-7578406_C>-	damaging	p.R175fs	WT	WT	WT	WT	WT	WT	WT	WT	WT	WT
ACH-000149	SKNSH_AUTONOMIC_GANGLIA	SKNSH_AUTONOMIC_GANGLIA	717431	SIDM01098	peripheral_nervous_system	4.0	female	nan	neuroblastoma	Caucasian	ATCC	nan	EMEM+10% FBS	5%DMSO	nan	50.6	PNET:Neuroblastoma	NB			0.0561968			-4.15337	-4.15337			-0.860209	-0.393609	-0.393609	WT	WT	WT	WT	WT	WT	WT	WT	WT	WT	WT	WT	WT	WT	WT	WT	WT	WT	WT
ACH-001652	SKGII_ENDOMETRIUM			nan	uterus																										WT	WT	WT	WT	WT	WT	WT	WT	WT	WT	WT	WT	WT	WT	WT	chr7_140624372-140624372_C>A	silent	p.P44P	WT
ACH-000644	COLO829_SKIN	COLO829_SKIN	687448	SIDM00909	skin	45.0	male	113.62714070000001	malignant_melanoma	Caucasian	ATCC	Adherent fibroblast.	RPMI-1640+10% FBS	5%DMSO	nan	126.9	Skin:Melanoma	SKCM	3.72318		0.164853	1.89654		-2.60075	-3.98811	0.344914		0.475613	-0.216799	0.0640578	WT	WT	WT	WT	WT	WT	WT	WT	WT	WT	WT	WT	WT	WT	WT	chr7_140453136-140453136_A>T	other non-conserving	p.V600E	chr17_8139658-8139658_G>A
ACH-000658	KMS18_HAEMATOPOIETIC_AND_LYMPHOID_TISSUE			nan	plasma_cell	nan	nan	nan	lymphoid_neoplasm	Asian	NIBRI	nan	nan	nan	nan	nan	nan	MM													WT	WT	WT	WT	WT	WT	chr17_7579414-7579414_C>T	damaging	p.W91*	WT	WT	WT	WT	WT	WT	chr7_140481402-140481402_C>G	other non-conserving	p.G469A	WT
ACH-000281	KP2_PANCREAS	KP2_PANCREAS	1298218	SIDM00582	pancreas	65.0	female	139.9638893	carcinoma	Asian	NIBRI	nan	nan	nan	nan	nan	Pancreas:Carcinoma	PAAD		0.0256312	0.0405196		-5.28596	-4.62524	-4.62524		-0.128053	-1.26619	-0.898476	-0.898476	WT	WT	WT	WT	WT	WT	chr17_7578448-7578448_G>T	other non-conserving	p.A161D	WT	WT	WT	WT	WT	WT	WT	WT	WT	WT
ACH-000835	GCT_SOFT_TISSUE	GCT_SOFT_TISSUE	906999	SIDM00853	soft_tissue	29.0	male	179.4906831	malignant_fibrous_histiocytoma-pleomorphic_sarcoma	Caucasian	NIBRI	nan	nan	nan	nan	64.6	Soft_Tissue:Sarcoma_FibrousHistiocytoma	SARC			0.0632416			-3.98298	-3.98298			-0.713615	-0.211308	-0.211308	WT	WT	WT	WT	WT	WT	chr17_7576897-7576898_GG>AA,chr17_7576898-7576898_G>A,chr17_7577539-7577540_GG>AA,chr17_7577540-7577540_G>A	damaging,silent,other non-conserving,silent	p.Q317*,p.P316P,p.R248W,p.N247N	WT	WT	WT	WT	WT	WT	chr7_140453136-140453136_A>T	other non-conserving	p.V600E	chr17_8132523-8132523_C>T
ACH-000556	SIHA_CERVIX	SIHA_CERVIX	930297	SIDM01093	cervix	nan	nan	nan	nan	nan	nan	nan	nan	nan	nan	nan	nan	CESC			0.149234			-2.74435	-4.13172			0.352061	-0.370445	-0.370445	WT	WT	WT	WT	WT	WT	WT	WT	WT	WT	WT	WT	WT	WT	WT	chr7_140449171-140449171_C>T	silent	p.Q636Q	WT
ACH-000279	EWS502_BONE			nan	bone	nan	nan	103.3429006	Ewings_sarcoma-peripheral_primitive_neuroectodermal_tumour	Caucasian	nan	nan	nan	nan	nan	nan	nan	nan													WT	WT	WT	WT	WT	WT	chr17_7578526-7578526_C>A	other non-conserving	p.C135F	WT	WT	WT	chr2_209116164-209116164_C>T	other non-conserving	p.D38N	WT	WT	WT	WT
ACH-000453	MOLP2_HAEMATOPOIETIC_AND_LYMPHOID_TISSUE			nan	plasma_cell	55.0	male	147.7800001	lymphoid_neoplasm	Asian	DSMZ	round to polymorph cells growing singly or in small clumps	RPMI-1640+20% FBS	5%DMSO	4 days	310.4	Lymphoma:Multiple_Myeloma	MM		0.0335867			-4.89597				0.674772				WT	WT	WT	WT	WT	WT	chr17_7578454-7578454_G>A	other non-conserving	p.A159V	WT	WT	WT	WT	WT	WT	WT	WT	WT	WT
ACH-001029	CHLA10_BONE			nan	bone																										WT	WT	WT	WT	WT	WT	chr17_7577156-7577156_C>A	damaging	nan	WT	WT	WT	WT	WT	WT	WT	WT	WT	WT
ACH-002089	201T_LUNG	201T_LUNG	1287381	SIDM00055	lung	nan	nan	nan	nan	nan	nan	nan	nan	nan	nan	nan	nan	LUAD			0.0440144			-4.50588	-4.50588			-1.1635	-0.770774	-0.770774	WT	WT	WT	WT	WT	WT	chr17_7577560-7577560_A>C	other non-conserving	p.S241A	WT	WT	WT	WT	WT	WT	WT	WT	WT	WT
ACH-000264	CALU6_LUNG	CALU6_LUNG	724859	SIDM00921	lung	61.0	female	87.77718147	carcinoma	Caucasian	ATCC	Adherent	EMEM +10%FBS	5% DMSO	nan	78.9	Lung:NSCLC_Others	LUAD	1.33531		0.122963	0.417179		-3.0237	-4.41107	-1.19346		0.111716	-0.669333	-0.931397	WT	WT	WT	WT	WT	WT	chr17_7578263-7578263_G>A	damaging	p.R196*	WT	WT	WT	WT	WT	WT	WT	WT	WT	WT
ACH-002243	HCE4_OESOPHAGUS	HCE4_OESOPHAGUS	753559	SIDM00052	esophagus	nan	nan	nan	nan	nan	nan	nan	nan	nan	nan	nan	nan	ESCA			0.260094			-1.94289	-3.33026			1.04161	0.48706	0.48706	chrX_76938365-76938365_C>T	other non-conserving	p.G795S	WT	WT	WT	chr17_7577547-7577547_C>A	other non-conserving	p.G245V	WT	WT	WT	WT	WT	WT	WT	WT	WT	WT
ACH-001121	MEC2_HAEMATOPOIETIC_AND_LYMPHOID_TISSUE			SIDM00827	lymphocyte	62.0	male	nan	lymphoid_neoplasm	Caucasian	nan	nan	nan	nan	nan	nan	nan	nan
ACH-000417	PANC0813_PANCREAS	PANC0813_PANCREAS	925347	SIDM01136	pancreas	85.0	male	109.1740429	carcinoma	Caucasian	NIBRI	nan	nan	nan	nan	nan	Pancreas:Carcinoma	PAAD			0.0309455			-5.01413	-5.01413			-1.60078	-1.31456	-1.31456	WT	WT	WT	chr6_33289094-33289094_T>C	other non-conserving	p.N153S	WT	WT	WT	WT	WT	WT	WT	WT	WT	WT	WT	WT	WT
ACH-000866	NCIH1048_LUNG	NCIH1048_LUNG	687995	SIDM00654	lung	nan	female	246.7023651	carcinoma	African_american	ATCC	Adherent epthelial	RPMI-1640 + 10% FBS	5%DMSO	nan	42.7	Lung:SCLC	SCLC	3.09767		0.064468	1.63119		-3.95527	-3.95527	0.0689772		-0.689774	-0.181661	-0.0563418	WT	WT	WT	WT	WT	WT	chr17_7577121-7577121_G>A,chr17_7579547-7579547_G>-	other non-conserving,damaging	p.R273C,p.P47fs	WT	WT	WT	WT	WT	WT	WT	WT	WT	WT
ACH-000573	MDAMB436_BREAST	MDAMB436_BREAST	1240172	SIDM00629	breast	43.0	female	151.8206873	carcinoma	Caucasian	ATCC	Adherent	RPMI-1640 + 10% FBS	5%DMSO	nan	58.6	Breast:Carcinoma	BRCA		0.0257012	0.0544037		-5.28202	-4.20015	-4.20015		-0.119955	-0.900459	-0.443664	-0.443664	WT	WT	WT	WT	WT	WT	chr17_7578238-7578239_->CCACACG	damaging	p.E204fs	WT	WT	WT	WT	WT	WT	chr7_140624404-140624415_CGGCGCCGGCGC>-	other non-conserving	p.GAGA30del	WT
ACH-000766	NCIH1648_LUNG	NCIH1648_LUNG	687799	SIDM00746	lung	39.0	male	177.9776725	carcinoma	African_american	ATCC	Mix	DMEM/F12(1:1) +10 % FBS	5% DMSO	nan	202.6	Lung:NSCLC_Adeno	LUAD			0.035783			-4.80458	-4.80458			-1.42049	-1.09036	-1.09036	WT	WT	WT	WT	WT	WT	chr17_7579582-7579583_->A	damaging	p.L35fs	WT	WT	WT	WT	WT	WT	WT	WT	WT	WT
ACH-000083	HS281T_FIBROBLAST			nan	fibroblast	37.0	female	80.65809322	carcinoma	Caucasian	GNF	nan	nan	nan	nan	nan	nan	nan		0.0409609			-4.60961				1.26426				WT	WT	WT	WT	WT	WT	WT	WT	WT	WT	WT	WT	WT	WT	WT	WT	WT	WT	WT
ACH-001793	LPS27_SOFT_TISSUE			nan	soft_tissue																										WT	WT	WT	WT	WT	WT	WT	WT	WT	WT	WT	WT	WT	WT	WT	WT	WT	WT	WT
ACH-000812	COLO783_SKIN	COLO783_SKIN	1240125	SIDM00955	skin	48.0	female	163.6031843	malignant_melanoma	Caucasian	DSMZ	ADHERENT FIBROBLASTS, NOT LIMITED TO MONOLAYER GROWTH	RPMI-1640+10% FBS	5%DMSO	5-7 DAYS	110.4	Skin:Melanoma	SKCM		0.0177694	0.0572205		-5.81446	-4.12732	-4.12732		-1.21603	-0.837801	-0.365744	-0.365744	chrX_76938965-76938965_G>A	other non-conserving	p.L595F	WT	WT	WT	chr17_7579716-7579716_G>A	other non-conserving	p.P27L	WT	WT	WT	WT	WT	WT	chr7_140453136-140453136_A>T	other non-conserving	p.V600E	WT
ACH-001460	C84_LARGE_INTESTINE			nan	colorectal																										WT	WT	WT	WT	WT	WT	chr17_7574003-7574003_G>A	damaging	p.R342*	WT	WT	WT	WT	WT	WT	WT	WT	WT	WT
ACH-000052	A673_BONE	A673_BONE	684052	SIDM00848	bone	15.0	female	61.21045057	Ewings_sarcoma-peripheral_primitive_neuroectodermal_tumour	Caucasian	NIBRI	nan	nan	nan	nan	nan	Bone:Sarcoma_Ewing	SARC			0.394666			-1.3413	-2.72866			1.5592	1.13073	1.13073	WT	WT	WT	WT	WT	WT	chr17_7579332-7579333_->TG	damaging	p.A119fs	WT	WT	WT	WT	WT	WT	chr7_140453136-140453136_A>T	other non-conserving	p.V600E	WT
ACH-000499	EW8_BONE			nan	bone	nan	nan	119.18437549999999	Ewings_sarcoma-peripheral_primitive_neuroectodermal_tumour	Caucasian	nan	nan	nan	nan	nan	nan	nan	nan													WT	WT	WT	WT	WT	WT	chr17_7578190-7578190_T>C	other non-conserving	p.Y220C	WT	WT	WT	WT	WT	WT	WT	WT	WT	WT
ACH-000475	HUH1_LIVER	HUH1_LIVER	1298146	SIDM00586	liver	35.0	male	141.6481844	carcinoma	Asian	HSRRB	Adherent	DMEM +10%FBS	5% DMSO	nan	151.3	Liver:HCC	LIHC		0.0508209	0.181531		-4.29843	-2.46171	-2.46171		1.90484	0.595235	1.41635	1.41635	WT	WT	WT	WT	WT	WT	chr17_7579358-7579358_C>A	other non-conserving	p.R110L	WT	WT	WT	WT	WT	WT	WT	WT	WT	WT
ACH-001396	SUM52PE_BREAST			nan	breast	nan	nan	nan	nan	nan	nan	nan	nan	nan	nan	nan	nan	nan													WT	WT	WT	WT	WT	WT	chr17_7578212-7578212_G>A	damaging	p.R213*	WT	WT	WT	WT	WT	WT	WT	WT	WT	WT
ACH-000551	K562_HAEMATOPOIETIC_AND_LYMPHOID_TISSUE	K562_HAEMATOPOIETIC_AND_LYMPHOID_TISSUE	905940	SIDM00791	blood	53.0	female	131.2836569	haematopoietic_neoplasm	Caucasian	ATCC	SUSPENSION	RPMI-1640+10%FBS	5%DMSO	nan	53.2	Leukemia:CML	LCML		0.0208187	0.0753039		-5.58598	-3.73113	-3.73113		-0.74567	-0.496931	0.0581553	0.0581553	WT	WT	WT	WT	WT	WT	chr17_7578523-7578524_->G	damaging	p.Q136fs	WT	WT	WT	WT	WT	WT	WT	WT	WT	WT
ACH-001993	NALM16_HAEMATOPOIETIC_AND_LYMPHOID_TISSUE			nan	blood																										WT	WT	WT	WT	WT	WT	WT	WT	WT	WT	WT	WT	WT	WT	WT	WT	WT	WT	WT
ACH-000889	KMM1_HAEMATOPOIETIC_AND_LYMPHOID_TISSUE			nan	plasma_cell	62.0	male	279.61340939999997	lymphoid_neoplasm	Asian	HSSRB	lymphocyte-like	RPMI 1640 medium with 10% fetal bovine serum.	nan	nan	nan	Lymphoma:Multiple_Myeloma	MM		0.0202306			-5.62732				-0.830769				WT	WT	WT	WT	WT	WT	chr17_7577559-7577559_G>A	other non-conserving	p.S241F	WT	WT	WT	WT	WT	WT	WT	WT	WT	WT
ACH-000213	HUPT4_PANCREAS	HUPT4_PANCREAS	907286	SIDM00531	pancreas	60.0	male	144.73272219999998	carcinoma	Asian	DSMZ	mixed	MEM + 10 % FBS	5%DMSO	nan	440.0	Pancreas:Carcinoma	PAAD			0.0436859			-4.51669	-4.51669			-1.1728	-0.782338	-0.782338	chrX_76937361-76937361_C>T	silent	p.L1129L	WT	WT	WT	chr17_7577517-7577517_A>G	other non-conserving	p.I255T	WT	WT	WT	WT	WT	WT	WT	WT	WT	WT
ACH-001357	MCF10A_BREAST			nan	engineered_breast
ACH-000544	OE21_OESOPHAGUS	OE21_OESOPHAGUS	1298359	SIDM00478	esophagus	74.0	male	108.4608605	carcinoma	Caucasian	HPACC	ADHERENT EPITHELIAL;	RPMI-1640+10% FBS	5%DMSO	nan	59.0	Oesophagus:Carcinoma	ESCA			0.12385			-3.01333	-4.4007			0.120638	-0.658238	-0.658238	WT	WT	WT	WT	WT	WT	chr17_7579417-7579417_G>-	damaging	p.S90fs	WT	WT	WT	WT	WT	WT	WT	WT	WT	WT
ACH-001411	UMUC5_URINARY_TRACT			nan	urinary_tract																										WT	WT	WT	WT	WT	WT	chr17_7579529-7579529_C>T	damaging	p.W53*	WT	WT	WT	WT	WT	WT	WT	WT	WT	WT
ACH-000028	KPL1_BREAST			SIDM00147	breast	50.0	female	117.7551518	carcinoma	Caucasian	DSMZ	adherent growing in monolayers(very dense colonies)	90% Dulbecco's MEM + 10% h.i. FBS	nan	~ 50 hrs	nan	Breast:Carcinoma	BRCA													chrX_76939673-76939674_->T	damaging	p.L359fs	WT	WT	WT	WT	WT	WT	WT	WT	WT	WT	WT	WT	WT	WT	WT	WT
ACH-002371	NCIBL2126_MATCHED_NORMAL_TISSUE	NCIBL2126_Matched_Normal_Tissue		SIDM00790	non_cancerous																0.114136			-3.13117	-3.13117			0.0192522	0.700069	0.700069	WT	WT	WT	WT	WT	WT	WT	WT	WT	WT	WT	WT	WT	WT	WT	WT	WT	WT	WT
ACH-001233	VMRCLCD_LUNG	VMRCLCD_LUNG	713869	SIDM00320	lung	nan	male	nan	carcinoma	Caucasian	HSRRB	MIX	EMEM+10% FBS	5% DMSO	nan	nan	nan	LUAD			0.0865334			-3.5306	-3.5306			-0.324399	0.272712	0.272712	WT	WT	WT	WT	WT	WT	chr17_7578406-7578406_C>T	other non-conserving	p.R175H	WT	WT	WT	WT	WT	WT	WT	WT	WT	chr17_8139242-8139262_GCCAGCGGGCTCATTCAACAC>-
ACH-001036	CMK115_HAEMATOPOIETIC_AND_LYMPHOID_TISSUE			SIDM01235	blood	nan	nan	nan	haematopoietic_neoplasm	Asian	HSSRB	SUSPENSION	RPMI-1640 +10% FBS	5% DMSO	nan	49.8	nan	LAML													WT	WT	WT	WT	WT	WT	WT	WT	WT	WT	WT	WT	WT	WT	WT	WT	WT	WT	WT
ACH-000328	LN215_CENTRAL_NERVOUS_SYSTEM			nan	central_nervous_system	nan	nan	108.0220019	glioma	Caucasian	nan	nan	nan	nan	nan	nan	nan	nan													WT	WT	WT	WT	WT	WT	chr17_7578195-7578197_CAC>-,chr17_7578275-7578277_GAG>-	other non-conserving,other non-conserving	p.V218del,p.P191del	chr3_10183542-10183542_G>T	other non-conserving	p.R4M	WT	WT	WT	WT	WT	WT	WT
ACH-000429	A704_KIDNEY	A704_KIDNEY	910920	SIDM00849	kidney	78.0	male	114.8901438	carcinoma	African_american	GNF	nan	MEM+10% FBS	5% DMSO	nan	nan	Kidney:Carcinoma	KIRC	2.57685		0.109081	1.36561		-3.19653	-4.58389	-0.207193		-0.0369762	-0.854243	-0.530718	WT	WT	WT	WT	WT	WT	chr17_7577509-7577509_C>A,chr17_7578527-7578527_A>G,chr17_7578554-7578554_A>C	damaging,other non-conserving,damaging	p.E258*,p.C135R,p.Y126D	chr3_10191546-10191546_T>A	other non-conserving	p.I180N	WT	WT	WT	WT	WT	WT	WT
ACH-000054	HT1080_SOFT_TISSUE	HT1080_SOFT_TISSUE	907064	SIDM00828	soft_tissue	35.0	male	79.58792792	fibrosarcoma	Caucasian	ATCC	Epithelial Adherent	EMEM+10%FBS	5%DMSO	nan	42.7	Soft_Tissue:Sarcoma_Fibro	SARC			0.0653512			-3.93564	-3.93564			-0.672885	-0.160658	-0.160658	WT	WT	WT	WT	WT	WT	WT	WT	WT	WT	WT	WT	chr2_209113113-209113113_G>A	other non-conserving	p.R132C	WT	WT	WT	WT
ACH-002204	UCH2_BONE	UCH2_BONE	1503373	SIDM01185	bone	nan	nan	nan	nan	nan	nan	nan	nan	nan	nan	nan	nan	nan			0.268684			-1.89602	-1.89602			1.08194	2.0216	2.0216	WT	WT	WT	chr6_33286573-33286573_C>T	other non-conserving	p.V724M	WT	WT	WT	WT	WT	WT	WT	WT	WT	WT	WT	WT	WT
ACH-000355	NCIH82_LUNG	NCIH82_LUNG	688031	SIDM01131	lung	41.0	male	108.504952	carcinoma	Caucasian	ATCC	adherent; epithelial	RPMI+10%FBS	5% DMSO	nan	21.6	Lung:SCLC	SCLC	7.59383		0.269458	2.92483		-1.89187	-3.27923	1.41423		1.08551	0.541655	0.977942	WT	WT	WT	WT	WT	WT	chr17_7579312-7579312_C>A	damaging	p.T125T	WT	WT	WT	WT	WT	WT	WT	WT	WT	WT
ACH-000350	COLO678_LARGE_INTESTINE	COLO678_LARGE_INTESTINE	910689	SIDM00957	colorectal	69.0	male	104.59855300000001	carcinoma	Caucasian	DSMZ	round or spindle - shaped adherent cells growing as monolayer	90% RPMI 1640 + 10% h.i. FBS	nan	~ 60-70 hrs	nan	Colorectal:Carcinoma	COAD/READ			0.113968			-3.1333	-4.52067			0.0174238	-0.786593	-0.786593	WT	WT	WT	WT	WT	WT	WT	WT	WT	WT	WT	WT	WT	WT	WT	WT	WT	WT	WT
ACH-000357	JEKO1_HAEMATOPOIETIC_AND_LYMPHOID_TISSUE	JEKO1_HAEMATOPOIETIC_AND_LYMPHOID_TISSUE	1327765	SIDM01038	lymphocyte	78.0	female	159.114053	lymphoid_neoplasm	Asian	nan	suspension	RPMI1640+20%FBS	10%DMSO	nan	46.0	Lymphoma:NH_B_cell	DLBC			0.475075			-1.07377	-1.07377			1.78937	2.90135	2.90135	chrX_76940012-76940012_G>A	other non-conserving	p.R246C	WT	WT	WT	chr17_7579514-7579514_G>-	damaging	p.P58fs	chr3_10183553-10183553_T>C	other non-conserving	p.W8R	WT	WT	WT	chr7_140624440-140624440_C>T	other non-conserving	p.D22N	WT
ACH-001289	COGAR359_SOFT_TISSUE			nan	soft_tissue																										WT	WT	WT	WT	WT	WT	WT	WT	WT	WT	WT	WT	WT	WT	WT	WT	WT	WT	WT
ACH-000715	SNU1214_UPPER_AERODIGESTIVE_TRACT			SIDM00167	upper_aerodigestive	55.0	male	193.9530872	carcinoma	Asian	KCLB	epithelial; monolayer	RPMI 1640 with L-glutamine (300mg/L), 90%; heat inactivated fetal bovine serum (FBS),10%	nan	96 hrs	nan	Upper_Aerodigestive_Tract:Carcinoma	HNSC		0.0335396			-4.89799				0.670601				WT	WT	WT	WT	WT	WT	chr17_7578455-7578455_C>G	other non-conserving	p.A159P	WT	WT	WT	WT	WT	WT	WT	WT	WT	WT
ACH-000233	DEL_HAEMATOPOIETIC_AND_LYMPHOID_TISSUE	DEL_HAEMATOPOIETIC_AND_LYMPHOID_TISSUE	906836	SIDM00949	lymphocyte	12.0	male	105.77260220000001	lymphoid_neoplasm	Caucasian	DSMZ	Grows often in cluster in suspention, most cells are polygonal ( some cells are round)	90% RPMI 1640 +10% h.i.FBS	nan	~ 30 hrs	81.1	Lymphoma:NH_T_cell	nan			0.0939708			-3.41164	-3.41164			-0.222054	0.399986	0.399986	WT	WT	WT	WT	WT	WT	chr17_7578206-7578206_T>A	other non-conserving	p.S215C	WT	WT	WT	WT	WT	WT	WT	WT	WT	WT
ACH-000120	CHP212_AUTONOMIC_GANGLIA	CHP212_AUTONOMIC_GANGLIA	906820	SIDM00910	peripheral_nervous_system	nan	nan	89.60933679	neuroblastoma	Caucasian	NIBRI	nan	nan	nan	nan	93.8	PNET:Neuroblastoma	NB	2.50457		0.11106	1.32456		-3.17059	-4.55795	-0.249875		-0.0146588	-0.82649	-0.538183	WT	WT	WT	WT	WT	WT	WT	WT	WT	WT	WT	WT	WT	WT	WT	WT	WT	WT	WT
ACH-000396	J82_URINARY_TRACT	J82_URINARY_TRACT	753566	SIDM00693	urinary_tract	58.0	male	119.65495859999999	carcinoma	Caucasian	ATCC	epithelial adherent	EMEM+10%FBS	5%DMSO	nan	34.4	Bladder:Carcinoma	BLCA			0.0859842			-3.53978	-4.92715			-0.332302	-1.2215	-1.2215	WT	WT	WT	WT	WT	WT	chr17_7576886-7576886_C>G,chr17_7577127-7577127_C>T	other non-conserving,other non-conserving	p.K320N,p.E271K	WT	WT	WT	WT	WT	WT	WT	WT	WT	WT
ACH-000235	PANC0403_PANCREAS	PANC0403_PANCREAS	1298476	SIDM01137	pancreas	70.0	male	102.7035533	carcinoma	Caucasian	ATCC	Adherent Epithelial	RPMI1640+15%FBS	5%DMSO	nan	39.4	Pancreas:Carcinoma	PAAD		0.0269381	0.0334645		-5.21421	-4.90122	-4.90122		0.0196443	-1.50364	-1.19377	-1.19377	WT	WT	WT	WT	WT	WT	chr17_7577548-7577548_C>T	other non-conserving	nan	WT	WT	WT	WT	WT	WT	WT	WT	WT	WT
ACH-002509	WM4235_SKIN			nan	skin																										WT	WT	WT	WT	WT	WT	WT	WT	WT	WT	WT	WT	WT	WT	WT	WT	WT	WT	WT
ACH-001338	CHP134_AUTONOMIC_GANGLIA	CHP134_AUTONOMIC_GANGLIA	910941	SIDM00285	peripheral_nervous_system	nan	nan	nan	nan	nan	nan	nan	nan	nan	nan	nan	nan	NB			0.0966362			-3.37129	-3.37129			-0.187337	0.443159	0.443159	WT	WT	WT	WT	WT	WT	WT	WT	WT	WT	WT	WT	WT	WT	WT	WT	WT	WT	WT
ACH-000223	HCC1937_BREAST	HCC1937_BREAST	749714	SIDM00874	breast	24.0	female	82.85897134	carcinoma	Caucasian	ATCC	adherent; line grows as large epithelial cells with tendency to float at high cell densitites	RPMI-1640+10% FBS	5%DMSO	nan	88.8	Breast:Carcinoma	BRCA	1.57061		0.11769	0.651329		-3.08694	-4.4743	-0.94997		0.0573129	-0.736988	-0.843479	WT	WT	WT	WT	WT	WT	chr17_7577022-7577022_G>A	damaging	p.R306*	WT	WT	WT	WT	WT	WT	WT	WT	WT	WT
ACH-001609	NP3_CENTRAL_NERVOUS_SYSTEM			nan	central_nervous_system																										WT	WT	WT	WT	WT	WT	chr17_7576852-7576852_C>A,chr17_7579882-7579882_C>G	damaging,other non-conserving	nan,p.E11Q	WT	WT	WT	WT	WT	WT	WT	WT	WT	WT
ACH-000226	SUPM2_HAEMATOPOIETIC_AND_LYMPHOID_TISSUE	SUPM2_HAEMATOPOIETIC_AND_LYMPHOID_TISSUE	1331040	SIDM00421	lymphocyte	5.0	female	107.1948767	lymphoid_neoplasm	Caucasian	DSMZ	round cells growing singly or in clumps in suspension	RPMI-1640+ 20% FBS	5% DMSO	40-50hrs	62.3	Lymphoma:NH_T_cell	nan		0.0178086	0.0472453		-5.81128	-4.40369	-4.40369		-1.20948	-1.07557	-0.661432	-0.661432	WT	WT	WT	WT	WT	WT	WT	WT	WT	WT	WT	WT	WT	WT	WT	WT	WT	WT	WT
ACH-000062	RERFLCMS_LUNG	RERFLCMS_LUNG	910931	SIDM00355	lung	nan	nan	105.68083190000002	carcinoma	Asian	JCRB	Adherent; dt=42.7 hrs	EMEM+10%FBS	5% DMSO	nan	68.9	Lung:NSCLC_Others	LUAD	2.00955		0.250438	1.00687		-1.99747	-3.38484	-0.580243		0.994649	0.428663	-0.07579	WT	WT	WT	WT	WT	WT	chr17_7578527-7578528_AA>-	damaging	p.FC134fs	WT	WT	WT	WT	WT	WT	WT	WT	WT	WT
ACH-001106	KOPN8_HAEMATOPOIETIC_AND_LYMPHOID_TISSUE	KOPN8_HAEMATOPOIETIC_AND_LYMPHOID_TISSUE	1330933	SIDM01034	blood	0.25	female	233.78225260000002	lymphoid_neoplasm	Asian	DSMZ	single round rather small cells growing in suspention	90% RPMI 1640 +10% h. i. FBS	nan	~ 48 hrs	nan	Leukemia:ALL	ALL		0.0313504	0.102354		-4.99537	-3.28836	-3.28836		0.470139	-0.115986	0.53189	0.53189	WT	WT	WT	WT	WT	WT	chr17_7577538-7577538_C>T	other non-conserving	nan	WT	WT	WT	WT	WT	WT	WT	WT	WT	WT
ACH-001101	KLM1_PANCREAS			nan	pancreas	nan	nan	nan	carcinoma	Asian	nan	nan	nan	nan	nan	nan	nan	PAAD
ACH-002146	JHOS3_OVARY	JHOS3_OVARY	1480358	SIDM00304	ovary	nan	nan	nan	nan	nan	nan	nan	nan	nan	nan	nan	nan	OV			0.09897			-3.33686	-3.33686			-0.157717	0.479994	0.479994	WT	WT	WT	WT	WT	WT	chr17_7577156-7577156_C>A	damaging	nan	WT	WT	WT	WT	WT	WT	WT	WT	WT	WT
ACH-001496	ESO26_OESOPHAGUS	ESO26_OESOPHAGUS	1503366	SIDM00539	esophagus	nan	nan	nan	nan	nan	nan	nan	nan	nan	nan	nan	nan	ESCA			0.157684			-2.66489	-2.66489			0.420426	1.19896	1.19896	WT	WT	WT	WT	WT	WT	chr17_7577539-7577539_G>A	other non-conserving	p.R248W	WT	WT	WT	WT	WT	WT	WT	WT	WT	WT
ACH-001239	WM2664_SKIN			SIDM00979	skin	58.0	female	123.35264529999999	malignant_melanoma	Caucasian	ATCC	Adherent	EMEM + 10% FBS	5%DMSO	nan	38.7	Skin:Melanoma	SKCM	2.50908			1.32716				-0.24718				-0.24718	WT	WT	WT	WT	WT	WT	WT	WT	WT	WT	WT	WT	WT	WT	WT	chr7_140453135-140453136_CA>AT,chr7_140453136-140453136_A>T	other non-conserving,other non-conserving	p.V600D,p.V600E	WT
ACH-001651	SKGI_ENDOMETRIUM			nan	uterus																										WT	WT	WT	WT	WT	WT	WT	WT	WT	WT	WT	WT	WT	WT	WT	WT	WT	WT	WT
ACH-000968	COLO792_SKIN	COLO792_SKIN	906814	SIDM00140	skin	62.0	male	587.5783867	malignant_melanoma	Caucasian	ECACC	Epithelial adherent	RPMI+10%FBS	?	nan	155.8	Skin:Melanoma	SKCM			0.797063			-0.327234	-1.7146			2.43167	2.21571	2.21571	WT	WT	WT	WT	WT	WT	WT	WT	WT	WT	WT	WT	chr2_209101836-209101836_G>A	silent	p.N404N	WT	WT	WT	WT
ACH-002127	NCIH2595_PLEURA	NCIH2595_PLEURA	1240132	SIDM00100	lung	nan	nan	nan	nan	nan	nan	nan	nan	nan	nan	nan	nan	MESO			0.0599121			-4.06101	-4.06101			-0.780746	-0.294791	-0.294791	WT	WT	WT	WT	WT	WT	chr17_7577121-7577121_G>A	other non-conserving	p.R273C	WT	WT	WT	WT	WT	WT	WT	WT	WT	WT
NA1		MET2B_Matched_Normal_Tissue			non_cancerous																0.0784598			-3.6719	-3.6719			-0.445972	0.121526	0.121526
ACH-000144	RERFGC1B_STOMACH	RERFGC1B_STOMACH	1240209	SIDM00358	gastric	41.0	male	113.3381055	carcinoma	Asian	NIBRI	nan	nan	nan	nan	nan	Gastric:Carcinoma	STAD	1.61847		0.10381	0.694627		-3.26798	-4.65535	-0.904944		-0.0984532	-0.930695	-0.91782	WT	WT	WT	WT	WT	WT	chr17_7578212-7578212_G>A	damaging	p.R213*	WT	WT	WT	WT	WT	WT	WT	WT	WT	WT
ACH-000945	NCIH650_LUNG	NCIH650_LUNG	722066	SIDM01124	lung	nan	male	436.10018210000004	carcinoma	Caucasian	ATCC	Mixed cells	DMEM:F12	5% DMSO	nan	90.6	Lung:NSCLC_Adeno	LUAD	7.66218		0.285654	2.93775		-1.80766	-3.19503	1.42767		1.15796	0.631753	1.02971	WT	WT	WT	WT	WT	WT	chr17_7578438-7578438_C>A	other non-conserving	p.K164N	WT	WT	WT	WT	WT	WT	WT	WT	WT	WT
ACH-000849	MDAMB468_BREAST	MDAMB468_BREAST	908123	SIDM00628	breast	51.0	female	188.2526523	carcinoma	African_american	ATCC	adherent epithelial	DMEM+10% FBS	5% DMSO	nan	63.5	Breast:Carcinoma	BRCA			0.0686398			-3.86481	-3.86481			-0.611944	-0.0848725	-0.0848725	WT	WT	WT	WT	WT	WT	chr17_7577120-7577120_C>T	other non-conserving	p.R273H	WT	WT	WT	WT	WT	WT	WT	WT	WT	WT
ACH-000506	NCIH146_LUNG	NCIH146_LUNG	910899	SIDM00698	lung	59.0	male	126.07434909999999	carcinoma	Caucasian	ATCC	Suspension; multicell aggregates	RPMI+10%FBS	5%DMSO	nan	123.4	Lung:SCLC	SCLC	3.26004		0.206903	1.70489		-2.27297	-3.66034	0.145624		0.757619	0.133898	0.139761	WT	WT	WT	WT	WT	WT	chr17_7576875-7576893_TCCAGTGGTTTCTTCTTTG>-	damaging	p.PKKKPLD318fs	WT	WT	WT	WT	WT	WT	WT	WT	WT	WT
ACH-000819	LN18_CENTRAL_NERVOUS_SYSTEM	LN18_CENTRAL_NERVOUS_SYSTEM	1240168	SIDM00685	central_nervous_system	65.0	male	204.79162659999997	glioma	Caucasian	ATCC	ADHERENT	DMEM+5% FBS	5% DMSO	nan	47.4	CNS:Glioma_HighGrade	GBM	4.36465		0.489446	2.12586		-1.03078	-2.41814	0.583392		1.82636	1.46296	1.02318	WT	WT	WT	WT	WT	WT	chr17_7577568-7577568_C>G	other non-conserving	p.C238S	WT	WT	WT	WT	WT	WT	WT	WT	WT	WT
ACH-000681	A549_LUNG	A549_LUNG	905949	SIDM00903	lung	58.0	male	159.49175290000002	carcinoma	Caucasian	ATCC	adherent; epithelial; DT=22 hrs	F-12 +10%FBS	5% DMSO	nan	54.0	Lung:NSCLC_Others	LUAD	4.06787		0.304215	2.02427		-1.71684	-3.1042	0.477749		1.2361	0.728927	0.603338	WT	WT	WT	WT	WT	WT	WT	WT	WT	WT	WT	WT	WT	WT	WT	WT	WT	WT	WT
ACH-000138	CFPAC1_PANCREAS	CFPAC1_PANCREAS	906821	SIDM00130	pancreas	26.0	male	79.90153548	carcinoma	Caucasian	nan	mixed line ~ 50-50	IMDM+10%fbs	5%DMSO	nan	80.2	Pancreas:Carcinoma	PAAD			0.0480483			-4.37937	-4.37937			-1.05465	-0.635417	-0.635417	WT	WT	WT	WT	WT	WT	chr17_7577557-7577557_A>G	other non-conserving	p.C242R	WT	WT	WT	WT	WT	WT	WT	WT	WT	WT
ACH-002389	ACN_AUTONOMIC_GANGLIA	ACN		SIDM00057	peripheral_nervous_system																0.0446815			-4.48418	-4.48418			-1.14483	-0.747554	-0.747554	WT	WT	WT	WT	WT	WT	chr17_7579349-7579349_A>G	other non-conserving	p.F113S	WT	WT	WT	WT	WT	WT	chr7_140453136-140453136_A>T	other non-conserving	p.V600E	WT
ACH-002461	RVH421_SKIN_FV1_RESISTANT			nan	skin																										WT	WT	WT	WT	WT	WT	WT	WT	WT	WT	WT	WT	WT	WT	WT	chr7_140453136-140453136_A>T	other non-conserving	p.V600E	WT
ACH-002235	DSH1_URINARY_TRACT	DSH1_URINARY_TRACT	753552	SIDM00970	urinary_tract	nan	nan	nan	nan	nan	nan	nan	nan	nan	nan	nan	nan	BLCA			0.0477452			-4.3885	-4.3885			-1.06251	-0.645185	-0.645185	WT	WT	WT	WT	WT	WT	chr17_7578457-7578457_C>T	other non-conserving	p.R158H	WT	WT	WT	WT	WT	WT	WT	WT	WT	WT
ACH-000409	OVSAHO_OVARY			nan	ovary	56.0	female	129.73402679999998	carcinoma	Asian	HSSRB	Adherent / Mixed 0.05% TRYPSIN	RPMI-1640+10%FBS	5% DMSO	nan	61.7	Ovary:Carcinoma	OV	2.39124	0.0247417		1.25776	-5.33691			-0.319345	-0.232951			-0.319345	WT	WT	WT	WT	WT	WT	chr17_7574003-7574003_G>A	damaging	p.R342*	WT	WT	WT	WT	WT	WT	WT	WT	WT	WT
ACH-001068	FEPD_HAEMATOPOIETIC_AND_LYMPHOID_TISSUE			nan	lymphocyte																										WT	WT	WT	WT	WT	WT	WT	WT	WT	WT	WT	WT	WT	WT	WT	WT	WT	WT	WT
ACH-000582	COLO741_SKIN	COLO741_SKIN		nan	skin	69.0	female	127.682666	malignant_melanoma	Caucasian	GNF	nan	nan	nan	nan	nan	Skin:Melanoma	SKCM	3.43361		0.271339	1.77973		-1.88183	-3.2692	0.223443		1.09414	0.552393	0.387918	WT	WT	WT	WT	WT	WT	chr17_7576882-7576883_->TT	damaging	p.P322fs	WT	WT	WT	WT	WT	WT	chr7_140453136-140453136_A>T	other non-conserving	p.V600E	WT
ACH-000976	HUCCT1_BILIARY_TRACT	HUCCT1_BILIARY_TRACT	907069	SIDM00587	bile_duct	nan	male	1458.405477	carcinoma	Asian	HSSRB	nan	RPMI 1640 medium with 10% fetal bovine serum.	nan	nan	nan	Biliary_Tract:Carcinoma	nan			0.0540754			-4.20888	-4.20888			-0.907972	-0.453007	-0.453007	WT	WT	WT	WT	WT	WT	chr17_7578406-7578406_C>T	other non-conserving	p.R175H	WT	WT	WT	WT	WT	WT	WT	WT	WT	WT
ACH-001212	TTC642_SOFT_TISSUE			nan	soft_tissue	nan	nan	nan	nan	nan	nan	nan	nan	nan	nan	nan	nan	nan													WT	WT	WT	WT	WT	WT	WT	WT	WT	chr3_10183666-10183666_G>A	silent	p.P45P	WT	WT	WT	WT	WT	WT	WT
ACH-000142	CAL29_URINARY_TRACT	CAL29_URINARY_TRACT	1290730	SIDM00936	urinary_tract	80.0	female	66.73799006	carcinoma	Caucasian	DSMZ	Adherent	DMEM +10 %FBS	5% DMSO	nan	82.5	Bladder:Carcinoma	BLCA			0.344452			-1.53763	-2.92499			1.39029	0.920671	0.920671	WT	WT	WT	WT	WT	WT	chr17_7577094-7577094_G>A	other non-conserving	nan	WT	WT	WT	WT	WT	WT	WT	WT	WT	WT
ACH-000273	SF539_CENTRAL_NERVOUS_SYSTEM	SF539_CENTRAL_NERVOUS_SYSTEM	905984	SIDM00083	central_nervous_system	nan	nan	107.54058300000001	glioma	Caucasian	Garraway Lab	Mix	RPMI-1640+ 5% FBS	5% DMSO	nan	105.3	CNS:Glioma_HighGrade	LGG			0.0848566			-3.55883	-3.55883			-0.348688	0.242507	0.242507	WT	WT	WT	WT	WT	WT	chr17_7574003-7574003_G>-	damaging	p.R342fs	WT	WT	WT	WT	WT	WT	WT	WT	WT	WT
ACH-000291	OV90_OVARY	OV90_OVARY	1240197	SIDM01141	ovary	64.0	female	93.71418335	carcinoma	Caucasian	NIBRI	Epithelial Adherent	MCDB 105 (1:1)Medium 199 +15%FBS	5%DMSO	nan	91.2	Ovary:Carcinoma	OV	2.54052	0.0276702	0.0675429	1.34513	-5.17552	-3.88805	-3.88805	-0.228494	0.0992796	-0.63194	-0.109739	-0.169117	WT	WT	WT	WT	WT	WT	chr17_7578206-7578206_T>G	other non-conserving	p.S215R	WT	WT	WT	WT	WT	WT	chr7_140477837-140477851_TAGGTGCTGTCACAT>-	other non-conserving	p.NVTAP486del	WT
ACH-000145	SKLMS1_SOFT_TISSUE	SKLMS1_SOFT_TISSUE	909720	SIDM01109	soft_tissue	43.0	female	81.05910683	sarcoma	Caucasian	NIBRI	nan	nan	nan	nan	nan	nan	nan	1.97615		0.0752589	0.98269		-3.73199	-3.73199	-0.60539		-0.497673	0.0572326	-0.274079	WT	WT	WT	WT	WT	WT	chr17_7577548-7577548_C>T,chr17_7577571-7577571_A>T	other non-conserving,other non-conserving	nan,p.M237K	WT	WT	WT	WT	WT	WT	WT	WT	WT	WT
ACH-002241	HAL01_HAEMATOPOIETIC_AND_LYMPHOID_TISSUE	HAL01_HAEMATOPOIETIC_AND_LYMPHOID_TISSUE	949153	SIDM00289	leukemia	nan	nan	nan	nan	nan	nan	nan	nan	nan	nan	nan	nan	ALL			0.208454			-2.2622	-2.2622			0.766889	1.62981	1.62981	WT	WT	WT	WT	WT	WT	WT	WT	WT	WT	WT	WT	WT	WT	WT	WT	WT	WT	WT
ACH-002156	LC1SQ_LUNG	LC1SQ_LUNG	1298223	SIDM00300	lung	nan	nan	nan	nan	nan	nan	nan	nan	nan	nan	nan	nan	LUSC			0.0389313			-4.68293	-4.68293			-1.31582	-0.9602	-0.9602	WT	WT	WT	WT	WT	WT	chr17_7577570-7577570_C>A	other non-conserving	p.M237I	WT	WT	WT	WT	WT	WT	WT	WT	WT	WT
ACH-000881	MELJUSO_SKIN	MELJUSO_SKIN	908125	SIDM00336	skin	58.0	female	232.6444366	malignant_melanoma	Caucasian	DSMZ	Adherent epithelial, monolayer	RPMI-1640+10% FBS	10%DMSO	nan	36.4	Skin:Melanoma	SKCM			0.185344			-2.43172	-3.81909			0.621036	-0.0359531	-0.0359531	WT	WT	WT	WT	WT	WT	WT	WT	WT	WT	WT	WT	WT	WT	WT	WT	WT	WT	WT
ACH-000925	DV90_LUNG			nan	lung	50.0	male	381.13790839999996	carcinoma	Caucasian	DSMZ	ADHERENT CELLS GROWING IN MONOLAYERS	RPMI-1640+10% FBS	5% DMSO	95 hrs	43.6	Lung:NSCLC_Adeno	LUAD		0.0345646			-4.85456				0.760011				chrX_76939673-76939674_->T	damaging	p.L359fs	chr6_33287553-33287553_C>T	other non-conserving	p.S515N	WT	WT	WT	WT	WT	WT	WT	WT	WT	WT	WT	WT	WT
ACH-000527	OVISE_OVARY	OVISE_OVARY	1240198	SIDM00564	ovary	40.0	female	166.3965156	carcinoma	Asian	HSSRB	nan	RPMI-1640 + 10% FBS	5%DMSO	nan	58.5	Ovary:Carcinoma	OV			0.130063			-2.94272	-4.33008			0.181394	-0.582683	-0.582683	chrX_76920263-76920263_C>G,chrX_76920265-76920265_A>T	other non-conserving,other non-conserving	p.A1272P,p.I1271N	WT	WT	WT	WT	WT	WT	WT	WT	WT	WT	WT	WT	WT	WT	WT	WT
ACH-001796	95T1000_SOFT_TISSUE			nan	soft_tissue																										WT	WT	WT	WT	WT	WT	WT	WT	WT	WT	WT	WT	WT	WT	WT	WT	WT	WT	WT
ACH-000363	SKMM2_HAEMATOPOIETIC_AND_LYMPHOID_TISSUE	SKMM2_HAEMATOPOIETIC_AND_LYMPHOID_TISSUE	753612	SIDM00391	plasma_cell	54.0	male	97.98150618	lymphoid_neoplasm	Caucasian	DSMZ	round single cells growing in suspention	80% RPMI 1640 +20% h.i. FBS	nan	~ 100 hrs	nan	Lymphoma:Multiple_Myeloma	MM			0.0588062			-4.08789	-4.08789			-0.803872	-0.32355	-0.32355	WT	WT	WT	WT	WT	WT	chr17_7578534-7578534_C>A	other non-conserving	p.K132N	WT	WT	WT	WT	WT	WT	WT	WT	WT	WT
ACH-001613	OCIAML4_HAEMATOPOIETIC_AND_LYMPHOID_TISSUE			nan	blood																										WT	WT	WT	WT	WT	WT	chr17_7578207-7578207_A>G	silent	p.H214H	WT	WT	WT	WT	WT	WT	WT	WT	WT	WT
ACH-000376	SF295_CENTRAL_NERVOUS_SYSTEM	SF295_CENTRAL_NERVOUS_SYSTEM	905985	SIDM00084	central_nervous_system	67.0	female	99.51877855	glioma	Caucasian	GNF	nan	nan	nan	nan	nan	CNS:Glioma_HighGrade	GBM	1.59027	0.0244489	0.0442715	0.669273	-5.35408	-4.49748	-4.49748	-0.93131	-0.268302	-1.15627	-0.761784	-0.846547	WT	WT	WT	WT	WT	WT	chr17_7577538-7577538_C>T	other non-conserving	nan	WT	WT	WT	WT	WT	WT	WT	WT	WT	WT
ACH-000998	CW2_LARGE_INTESTINE	CW2_LARGE_INTESTINE	910554	SIDM00282	colorectal	55.0	female	2211.992655	carcinoma	Asian	RIKEN	epithelial-like	RPMI 1640(or DM-160AU) +10%FBS	nan	nan	nan	Colorectal:Carcinoma	COAD/READ			0.206382			-2.27661	-2.27661			0.754489	1.61439	1.61439	chrX_76776330-76776330_C>T,chrX_76776929-76776929_A>G,chrX_76845412-76845413_->A,chrX_76937931-76937931_A>T,chrX_76938973-76938973_G>T,chrX_76939764-76939764_T>C	other non-conserving,silent,damaging,silent,other non-conserving,silent	p.S2379N,p.S2341S,nan,p.V939V,p.P592H,p.E328E	WT	WT	WT	chr17_7579546-7579546_C>T	silent	p.P47P	WT	WT	WT	WT	WT	WT	WT	WT	WT	chr17_8132091-8132091_G>A
ACH-000704	OAW42_OVARY	OAW42_OVARY	910548	SIDM00480	ovary	nan	female	189.4438445	carcinoma	Caucasian	ECACC	Epithelial Adherent	DMEM+10%FBS	nan	nan	50.0	Ovary:Carcinoma	OV	3.13342		0.0331731	1.64774		-4.91384	-4.91384	0.0861902		-1.51449	-1.20727	-0.560538	WT	WT	WT	WT	WT	WT	WT	WT	WT	WT	WT	WT	WT	WT	WT	WT	WT	WT	WT
ACH-002218	CESS_HAEMATOPOIETIC_AND_LYMPHOID_TISSUE	CESS_HAEMATOPOIETIC_AND_LYMPHOID_TISSUE	910688	SIDM00917	leukemia	nan	nan	nan	nan	nan	nan	nan	nan	nan	nan	nan	nan	LAML			0.0389246			-4.68317	-4.68317			-1.31604	-0.960466	-0.960466	WT	WT	WT	WT	WT	WT	WT	WT	WT	WT	WT	WT	WT	WT	WT	WT	WT	WT	WT
ACH-000645	JL1_PLEURA			nan	lung	54.0	male	150.7056669	mesothelioma	Caucasian	DSMZ	nan	nan	5%DMSO	nan	63.1	Lung:Mesothelioma	MESO		0.0197983			-5.65848				-0.89492				WT	WT	WT	chr6_33288656-33288656_C>T	other non-conserving	p.R299Q	WT	WT	WT	WT	WT	WT	WT	WT	WT	WT	WT	WT	WT
ACH-000432	BV173_HAEMATOPOIETIC_AND_LYMPHOID_TISSUE	BV173_HAEMATOPOIETIC_AND_LYMPHOID_TISSUE	910710	SIDM00962	blood	45.0	male	119.0742413	haematopoietic_neoplasm	Caucasian	DSMZ	SUSPENSION ( small round cells, slow to grow)	RPMI-1640+20% FBS	10% DMSO	nan	100.6	Leukemia:CML	LCML			0.196123			-2.35017	-2.35017			0.691202	1.53569	1.53569	WT	WT	WT	WT	WT	WT	WT	WT	WT	WT	WT	WT	WT	WT	WT	WT	WT	WT	WT
ACH-002206	WM278_SKIN	WM278_SKIN	1240226	SIDM00975	skin	nan	nan	nan	nan	nan	nan	nan	nan	nan	nan	nan	nan	SKCM			0.18278			-2.45182	-3.83919			0.603746	-0.0574557	-0.0574557	WT	WT	WT	WT	WT	WT	WT	WT	WT	WT	WT	WT	WT	WT	WT	chr7_140453136-140453136_A>T	other non-conserving	p.V600E	WT
ACH-000719	RMGI_OVARY	RMGI_OVARY	909699	SIDM00352	ovary	34.0	female	217.4137109	carcinoma	Asian	NIBRI	nan	nan	nan	nan	nan	Ovary:Carcinoma	OV	7.37354		0.098763	2.88236		-3.33989	-3.33989	1.37006		-0.160316	0.476762	0.923414	WT	WT	WT	WT	WT	WT	WT	WT	WT	WT	WT	WT	WT	WT	WT	WT	WT	WT	WT
ACH-000186	NCIH2444_LUNG	NCIH2444_LUNG	1298356	SIDM00723	lung	nan	male	84.93713188	carcinoma	Caucasian	ATCC	Adherent	RPMI-1640+10% FBS	5%DMSO	nan	116.0	Lung:NSCLC_Others	UNABLE TO CLASSIFY			0.0930279			-3.42619	-4.81356			-0.234572	-1.09997	-1.09997	chrX_76888716-76888716_T>A	other non-conserving	p.N1705Y	WT	WT	WT	chr17_7577574-7577574_T>C	other non-conserving	p.Y236C	WT	WT	WT	WT	WT	WT	WT	WT	WT	WT
ACH-002189	RCCFG2_KIDNEY	RCCFG2_KIDNEY	1524414	SIDM00819	kidney	nan	nan	nan	nan	nan	nan	nan	nan	nan	nan	nan	nan	KIRC			0.0478727			-4.38465	-4.38465			-1.0592	-0.641069	-0.641069	WT	WT	WT	WT	WT	WT	chr17_7578211-7578211_C>T,chr17_7578212-7578212_G>A	other non-conserving,damaging	p.R213Q,p.R213*	chr3_10188297-10188297_T>-	damaging	p.I147fs	WT	WT	WT	WT	WT	WT	WT
ACH-000724	HT1376_URINARY_TRACT	HT1376_URINARY_TRACT	907066	SIDM00678	urinary_tract	58.0	female	164.4186284	carcinoma	Caucasian	nan	Epithelial adherent	EMEM +10%FBS	5%DMSO	nan	nan	Bladder:Carcinoma	BLCA	3.1666		0.13587	1.66294		-2.8797	-4.26707	0.101995		0.235611	-0.51526	-0.206632	WT	WT	WT	WT	WT	WT	chr17_7577532-7577532_G>A	other non-conserving	p.P250L	WT	WT	WT	WT	WT	WT	WT	WT	WT	WT
ACH-000703	DMS79_LUNG	DMS79_LUNG	753551	SIDM00524	lung	65.0	nan	154.16320149999999	carcinoma	Caucasian	ATCC	Suspension; multicell aggregates	RPMI-1640+10%FBS	5% DMSO	nan	244.0	Lung:SCLC	SCLC	2.48129	0.030053	0.0388807	1.31109	-5.05635	-4.6848	-4.6848	-0.263888	0.344612	-1.31744	-0.962208	-0.613048	WT	WT	WT	WT	WT	WT	chr17_7577101-7577101_C>-	damaging	p.G279fs	WT	WT	WT	WT	WT	WT	WT	WT	WT	WT
ACH-000004	HEL_HAEMATOPOIETIC_AND_LYMPHOID_TISSUE	HEL_HAEMATOPOIETIC_AND_LYMPHOID_TISSUE	907053	SIDM00594	blood	30.0	male	98.18537713	haematopoietic_neoplasm	Caucasian	DSMZ	Round cells to occasionally polynucleated, single cells in suspension, few adherent	RPMI1640+10%FBS	10%DMSO	36 hrs	38.4	Leukemia:AML	LAML			0.0905911			-3.46449	-3.46449			-0.267519	0.343447	0.343447	WT	WT	WT	WT	WT	WT	chr17_7578532-7578532_A>T	other non-conserving	p.M133K	WT	WT	WT	WT	WT	WT	WT	WT	WT	WT
ACH-001087	HK2_KIDNEY			nan	engineered_kidney	nan	nan	nan	other	nan	nan	nan	nan	nan	nan	nan	nan	KIRC
ACH-001099	KD_SOFT_TISSUE			nan	soft_tissue	nan	nan	nan	nan	nan	nan	nan	nan	nan	nan	nan	nan	nan													chrX_76937793-76937793_G>T	other non-conserving	p.S985R	WT	WT	WT	WT	WT	WT	WT	WT	WT	WT	WT	WT	WT	WT	WT	WT
ACH-001836	ICC108_BILIARY_TRACT			nan	bile_duct																										WT	WT	WT	WT	WT	WT	chr17_7579585-7579585_G>-	damaging	p.P34fs	WT	WT	WT	WT	WT	WT	WT	WT	WT	WT
ACH-000759	MDAMB175VII_BREAST	MDAMB175VII_BREAST	908120	SIDM00633	breast	56.0	female	157.8873017	carcinoma	African_american	ATCC	Adherent	RPMI+10%FBS	5%DMSO	nan	133.7	Breast:Carcinoma	BRCA	1.86915		0.0682891	0.902379		-3.8722	-3.8722	-0.688904		-0.618302	-0.0927793	-0.390842	WT	WT	WT	WT	WT	WT	WT	WT	WT	WT	WT	WT	WT	WT	WT	WT	WT	WT	WT
ACH-002393	CROAP3_HAEMATOPOIETIC_AND_LYMPHOID_TISSUE			SIDM00070	lymphocyte																										WT	WT	WT	WT	WT	WT	WT	WT	WT	WT	WT	WT	WT	WT	WT	WT	WT	WT	WT
ACH-002059	P30OHK_HAEMATOPOIETIC_AND_LYMPHOID_TISSUE	P30OHK_HAEMATOPOIETIC_AND_LYMPHOID_TISSUE		SIDM00364	blood	nan	nan	nan	nan	nan	nan	nan	nan	nan	nan	nan	nan	ALL			0.199087			-2.32853	-2.32853			0.709821	1.55885	1.55885	chrX_76938684-76938684_T>C	silent	p.K688K	WT	WT	WT	WT	WT	WT	WT	WT	WT	WT	WT	WT	WT	WT	WT	WT
ACH-000431	NCIH1694_LUNG	NCIH1694_LUNG	688006	SIDM00741	lung	61.0	male	109.53498700000002	carcinoma	Caucasian	ATCC	suspension line; lots of debris	DMEM:F12 (1:1) + 5% FBS	5% DMSO	nan	81.2	Lung:SCLC	SCLC	3.34177		0.209644	1.74061		-2.25399	-3.64135	0.18277		0.773955	0.154213	0.168491	WT	WT	WT	WT	WT	WT	chr17_7577156-7577156_C>A	damaging	nan	WT	WT	WT	WT	WT	WT	WT	WT	WT	chr17_8139464-8139464_T>C
ACH-000173	JHUEM3_ENDOMETRIUM			nan	uterus	nan	nan	123.77049070000001	carcinoma	Asian	RIKEN	epithelial-like	(DMEM:HamF12=1:1) +10%FBS	nan	nan	nan	Endometrium:Carcinoma	UCEC		0.0248655			-5.32971				-0.218123				WT	WT	WT	WT	WT	WT	chr17_7578431-7578431_G>A	damaging	p.Q167*	WT	WT	WT	WT	WT	WT	WT	WT	WT	WT
ACH-001548	LS_AUTONOMIC_GANGLIA			nan	peripheral_nervous_system																										WT	WT	WT	WT	WT	WT	WT	WT	WT	WT	WT	WT	WT	WT	WT	WT	WT	WT	WT
ACH-000668	HCC70_BREAST	HCC70_BREAST	907048	SIDM00673	breast	49.0	female	131.4398136	carcinoma	African_american	NIBRI	nan	nan	nan	nan	nan	Breast:Carcinoma	BRCA	2.3278		0.086784	1.21897		-3.52643	-4.91379	-0.359685		-0.32081	-1.20721	-0.783449	WT	WT	WT	WT	WT	WT	chr17_7577538-7577538_C>T	other non-conserving	nan	WT	WT	WT	WT	WT	WT	WT	WT	WT	WT
ACH-001092	HS571T_OVARY			nan	ovary	65.0	female	nan	carcinoma	Caucasian	ATCC	Adherent; fibroblasts; very slow grower	DMEM+10%FBS	5% DMSO	nan	nan	nan	nan													WT	WT	WT	WT	WT	WT	chr17_7578406-7578406_C>T	other non-conserving	p.R175H	WT	WT	WT	WT	WT	WT	WT	WT	WT	WT
ACH-000403	NCIH747_LARGE_INTESTINE	NCIH747_LARGE_INTESTINE	908457	SIDM00778	colorectal	69.0	male	123.0807102	carcinoma	Caucasian	NIBRI	nan	nan	nan	nan	nan	Colorectal:Carcinoma	COAD/READ	1.44277		0.117199	0.528839		-3.09297	-4.48033	-1.07735		0.0521236	-0.743441	-0.910394	WT	WT	WT	WT	WT	WT	chr17_7578457-7578457_C>A	other non-conserving	p.R158L	WT	WT	WT	WT	WT	WT	WT	WT	WT	WT
ACH-002326	MACLS2_BREAST			nan	breast
ACH-000820	SW403_LARGE_INTESTINE			SIDM00836	colorectal	51.0	female	177.3707209	carcinoma	Caucasian	NIBRI	nan	nan	nan	nan	nan	Colorectal:Carcinoma	COAD/READ													WT	WT	WT	WT	WT	WT	chr17_7579536-7579536_C>A	damaging	p.E51*	WT	WT	WT	WT	WT	WT	WT	WT	WT	WT
ACH-000009	C2BBE1_LARGE_INTESTINE	C2BBE1_LARGE_INTESTINE	910700	SIDM01233	colorectal	72.0	male	115.8861966	carcinoma	Caucasian	ATCC	Adherent	DMEM +10%FBS	5% DMSO	nan	110.9	Colorectal:Carcinoma	COAD/READ	6.00737		0.0917387	2.58673		-3.44633	-3.44633	1.06265		-0.251893	0.362878	0.712762	WT	WT	WT	WT	WT	WT	chr17_7578239-7578239_C>A	damaging	p.E204*	WT	WT	WT	WT	WT	WT	WT	WT	WT	WT
ACH-001079	HCC1897_LUNG			nan	lung	nan	nan	nan	carcinoma	nan	nan	nan	nan	nan	nan	nan	nan	nan
ACH-001353	JOPACA1_PANCREAS			nan	pancreas																										WT	WT	WT	WT	WT	WT	chr17_7576851-7576851_A>C	damaging	nan	WT	WT	WT	WT	WT	WT	WT	WT	WT	WT
ACH-001089	HLE_LIVER	HLE_LIVER	907057	SIDM00064	liver	68.0	male	nan	carcinoma	Asian	nan	nan	nan	nan	nan	nan	nan	LIHC			0.185842			-2.42785	-2.42785			0.624367	1.45258	1.45258	WT	WT	WT	WT	WT	WT	chr17_7577550-7577550_C>G	other non-conserving	p.G244A	WT	WT	WT	WT	WT	WT	WT	WT	WT	WT
ACH-001526	HUO9_BONE	HUO9_BONE	907072	SIDM00599	bone	nan	nan	nan	nan	nan	nan	nan	nan	nan	nan	nan	nan	nan			0.472039			-1.08302	-2.47039			1.78141	1.40707	1.40707	WT	WT	WT	WT	WT	WT	WT	WT	WT	WT	WT	WT	WT	WT	WT	WT	WT	WT	WT
ACH-001318	PLCPRF5_LIVER			nan	liver	24.0	male	282.94332369999995	carcinoma	African_american	ATCC	Epithelial Adherent	EMEM +10%FBS	5%DMSO	nan	64.6	Liver:HCC	LIHC	2.27848	0.0297408		1.18807	-5.07141			-0.391817	0.313598			-0.391817	WT	WT	WT	WT	WT	WT	chr17_7577534-7577534_C>A	other non-conserving	p.R249S	WT	WT	WT	WT	WT	WT	WT	WT	WT	WT
ACH-001957	UMCHOR1_BONE			nan	bone																										WT	WT	WT	WT	WT	WT	WT	WT	WT	WT	WT	WT	WT	WT	WT	WT	WT	WT	WT
ACH-000831	HEC50B_ENDOMETRIUM			nan	uterus	nan	female	231.9100059	carcinoma	Asian	HSSRB	epithelial-like	Eagle's minimal essential medium with 15% fetal calf serum	nan	nan	nan	Endometrium:Carcinoma	UCEC		0.018808			-5.73251				-1.04733				WT	WT	WT	chr6_33288735-33288735_G>A	other non-conserving	p.R273W	WT	WT	WT	WT	WT	WT	WT	WT	WT	WT	WT	WT	WT
ACH-000648	NCIH28_PLEURA	NCIH28_PLEURA	908470	SIDM00720	lung	48.0	male	144.07122090000001	mesothelioma	African_american	ATCC	adherent	RPMI+10%FBS	10% DMSO	nan	81.2	Lung:Mesothelioma	MESO			0.101095			-3.30622	-4.69358			-0.131348	-0.971602	-0.971602	WT	WT	WT	WT	WT	WT	WT	WT	WT	chr3_10183797-10183797_T>A	other non-conserving	p.L89H	WT	WT	WT	WT	WT	WT	WT
ACH-001137	NCIH1993_LUNG	NCIH1993_LUNG	908476	SIDM00758	lung	nan	nan	nan	nan	nan	nan	nan	nan	nan	nan	nan	nan	LUAD			0.153544			-2.70328	-4.09064			0.387401	-0.326497	-0.326497	chrX_76939991-76939991_A>G	silent	p.L253L	WT	WT	WT	chr17_7577555-7577555_G>C	other non-conserving	p.C242W	WT	WT	WT	WT	WT	WT	WT	WT	WT	WT
ACH-002255	KARPAS231_HAEMATOPOIETIC_AND_LYMPHOID_TISSUE	KARPAS231_HAEMATOPOIETIC_AND_LYMPHOID_TISSUE	1327774	SIDM01017	lymphoma	nan	nan	nan	nan	nan	nan	nan	nan	nan	nan	nan	nan	nan			0.0812622			-3.62127	-3.62127			-0.402411	0.175698	0.175698	chrX_76778872-76778872_A>T	other non-conserving	p.I2236K	WT	WT	WT	chr17_7577017-7577017_A>T	damaging	nan	WT	WT	WT	WT	WT	WT	WT	WT	WT	WT
ACH-000919	IM95_STOMACH	IM95_STOMACH	1240155	SIDM00602	gastric	63.0	male	387.6541767	carcinoma	Asian	HSRRB	Adherent	DMEM +10%FBS	5% DMSO	nan	40.2	Gastric:Carcinoma	STAD	1.90923		0.15804	0.932989		-2.66164	-4.049	-0.657073		0.423225	-0.281947	-0.46951	WT	WT	WT	WT	WT	WT	WT	WT	WT	WT	WT	WT	WT	WT	WT	WT	WT	WT	WT
ACH-002112	EW12_BONE	EW12_BONE	949162	SIDM00200	bone	nan	nan	nan	nan	nan	nan	nan	nan	nan	nan	nan	nan	nan			0.171465			-2.54401	-3.93138			0.524425	-0.156097	-0.156097	WT	WT	WT	WT	WT	WT	chr17_7577121-7577121_G>A	other non-conserving	p.R273C	WT	WT	WT	WT	WT	WT	WT	WT	WT	WT
ACH-000508	CORL88_LUNG	CORL88_LUNG	906808	SIDM00506	lung	55.0	male	132.5932561	carcinoma	Caucasian	ECACC	nan	nan	nan	nan	nan	Lung:SCLC	SCLC	2.59974		0.236394	1.37837		-2.08073	-3.4681	-0.193927		0.923015	0.33958	0.0728269	WT	WT	WT	WT	WT	WT	chr17_7578461-7578461_C>A	other non-conserving	p.V157F	WT	WT	WT	WT	WT	WT	WT	WT	WT	WT
ACH-002270	MCCAR_HAEMATOPOIETIC_AND_LYMPHOID_TISSUE	MCCAR_HAEMATOPOIETIC_AND_LYMPHOID_TISSUE	683665	SIDM00636	non_cancerous	nan	nan	nan	nan	nan	nan	nan	nan	nan	nan	nan	nan	MM			0.0733839			-3.76839	-3.76839			-0.528989	0.0182885	0.0182885	WT	WT	WT	WT	WT	WT	WT	WT	WT	WT	WT	WT	WT	WT	WT	WT	WT	WT	WT
ACH-001573	MOLM1_HAEMATOPOIETIC_AND_LYMPHOID_TISSUE			nan	blood																										WT	WT	WT	WT	WT	WT	chr17_7578263-7578263_G>A	damaging	p.R196*	WT	WT	WT	WT	WT	WT	WT	WT	WT	WT
ACH-000674	NUGC4_STOMACH	NUGC4_STOMACH	1298357	SIDM00570	gastric	35.0	female	175.0163689	carcinoma	Asian	GNF	nan	nan	nan	nan	nan	Gastric:Carcinoma	STAD	2.6181	0.0326324	0.0376466	1.38852	-4.93755	-4.73134	-4.73134	-0.183371	0.589163	-1.35747	-1.012	-0.597684	WT	WT	WT	WT	WT	WT	WT	WT	WT	WT	WT	WT	WT	WT	WT	WT	WT	WT	WT
ACH-000618	SNU1041_UPPER_AERODIGESTIVE_TRACT			SIDM00173	upper_aerodigestive	nan	nan	148.17333190000002	carcinoma	Asian	KCLB	epithelial; monolayer	RPMI 1640 with L-glutamine (300mg/L), 90%; heat inactivated fetal bovine serum (FBS),10%	nan	nan	nan	Upper_Aerodigestive_Tract:Carcinoma	HNSC		0.0274697			-5.18601				0.0776859				WT	WT	WT	WT	WT	WT	chr17_7577547-7577547_C>T	other non-conserving	p.G245D	WT	WT	WT	WT	WT	WT	WT	WT	WT	WT
ACH-001329	ANGMCSS_CENTRAL_NERVOUS_SYSTEM			nan	central_nervous_system																										WT	WT	WT	WT	WT	WT	WT	WT	WT	WT	WT	WT	WT	WT	WT	WT	WT	WT	WT
ACH-001736	HB1119_HAEMATOPOIETIC_AND_LYMPHOID_TISSUE			nan	blood																										WT	WT	WT	WT	WT	WT	chr17_7577539-7577539_G>A,chr17_7579313-7579313_G>A	other non-conserving,damaging	p.R248W,p.T125M	WT	WT	WT	WT	WT	WT	WT	WT	WT	WT
ACH-001458	C75_LARGE_INTESTINE			nan	colorectal																										WT	WT	WT	WT	WT	WT	chr17_7577534-7577534_C>A	other non-conserving	p.R249S	WT	WT	WT	WT	WT	WT	WT	WT	WT	WT
ACH-000683	SNU503_LARGE_INTESTINE			SIDM00497	colorectal	52.0	male	164.5923193	carcinoma	Asian	KCLB	nan	nan	nan	nan	137.5	Colorectal:Carcinoma	COAD/READ		0.0314928			-4.98883				0.483599				WT	WT	WT	WT	WT	WT	chr17_7577120-7577120_C>A	other non-conserving	p.R273L	WT	WT	WT	WT	WT	WT	chr7_140624440-140624440_C>T	other non-conserving	p.D22N	WT
ACH-002196	SBC1_LUNG	SBC1_LUNG	713885	SIDM00365	lung	nan	nan	nan	nan	nan	nan	nan	nan	nan	nan	nan	nan	SCLC			0.506825			-0.98044	-2.36781			1.86967	1.51682	1.51682	WT	WT	WT	WT	WT	WT	chr17_7579329-7579329_T>A	damaging	p.K120*	WT	WT	WT	WT	WT	WT	WT	WT	WT	WT
NA5		M00921_Matched_Normal_Tissue			non_cancerous																0.0656971			-3.92803	-3.92803			-0.666332	-0.152509	-0.152509
ACH-002362	NCIBL128_MATCHED_NORMAL_TISSUE	NCIBL128_Matched_Normal_Tissue		nan	non_cancerous																0.0599632			-4.05978	-4.05978			-0.779688	-0.293475	-0.293475	WT	WT	WT	WT	WT	WT	WT	WT	WT	WT	WT	WT	WT	WT	WT	WT	WT	WT	WT
ACH-000635	SNU119_OVARY			nan	ovary	50.0	female	171.73640569999998	carcinoma	Asian	KCLB	epithelial; monolayer	RPMI 1640 with L-glutamine (300mg/L), 90%; heat inactivated fetal bovine serum (FBS),10%	nan	53 hrs	nan	Ovary:Carcinoma	OV	3.25093			1.70085				0.141426				0.141426	WT	WT	WT	WT	WT	WT	chr17_7578479-7578479_G>C	other non-conserving	p.P151A	WT	WT	WT	WT	WT	WT	WT	WT	WT	WT
ACH-000400	SKCO1_LARGE_INTESTINE	SKCO1_LARGE_INTESTINE	909718	SIDM01096	colorectal	65.0	male	101.39832340000001	carcinoma	Caucasian	ATCC	ADHERENT EPITHELIAL;	EMEM +10% FBS	5% DMSO	nan	76.0	Colorectal:Carcinoma	COAD/READ	1.00611	0.0188807	0.0202051	0.0087889	-5.72694	-5.62914	-5.62914	-1.61814	-1.03586	-2.12991	-1.97258	-1.79536	WT	WT	WT	WT	WT	WT	WT	WT	WT	WT	WT	WT	WT	WT	WT	WT	WT	WT	WT
ACH-002308	SUPB8_HAEMATOPOIETIC_AND_LYMPHOID_TISSUE	SUPB8_HAEMATOPOIETIC_AND_LYMPHOID_TISSUE	910209	SIDM01177	leukemia	nan	nan	nan	nan	nan	nan	nan	nan	nan	nan	nan	nan	nan			0.228341			-2.13074	-2.13074			0.879993	1.77047	1.77047	WT	WT	WT	WT	WT	WT	chr17_7577548-7577548_C>T	other non-conserving	nan	WT	WT	WT	WT	WT	WT	WT	WT	WT	WT
ACH-000218	PL21_HAEMATOPOIETIC_AND_LYMPHOID_TISSUE	PL21_HAEMATOPOIETIC_AND_LYMPHOID_TISSUE	1330991	SIDM00450	blood	24.0	male	141.5984896	haematopoietic_neoplasm	Asian	DSMZ	single cells in suspention; cells have a rather monoblastic morphology without the typical APL granules	80% RPMI 1640 +20% h.i. FBs	nan	~ 50 hrs	72.8	Leukemia:AML	LAML		0.0301511	0.101804		-5.05165	-3.29613	-3.29613		0.354291	-0.122673	0.523574	0.523574	WT	WT	WT	WT	WT	WT	WT	WT	WT	WT	WT	WT	WT	WT	WT	WT	WT	WT	WT
ACH-000227	KPNYN_AUTONOMIC_GANGLIA	KPNYN_AUTONOMIC_GANGLIA	907314	SIDM00556	peripheral_nervous_system	2.0	male	131.54239809999999	neuroblastoma	Asian	HSSRB	adherent	RPMI-1640 + 10% FBS	10%DMSO	nan	153.8	PNET:Neuroblastoma	NB			0.1083			-3.20689	-3.20689			-0.0458953	0.619053	0.619053	WT	WT	WT	WT	WT	WT	WT	WT	WT	WT	WT	WT	WT	WT	WT	WT	WT	WT	WT
ACH-002022	PMFKO14_LARGE_INTESTINE			nan	colorectal																										WT	WT	WT	WT	WT	WT	chr17_7578394-7578394_T>C	other non-conserving	p.H179R	WT	WT	WT	WT	WT	WT	chr7_140482926-140482927_->GGG	other non-conserving	p.403_403P>PP	WT
ACH-001392	SUM185PE_BREAST			nan	breast																										WT	WT	WT	WT	WT	WT	chr17_7578500-7578500_G>A	damaging	p.Q144*	WT	WT	WT	WT	WT	WT	WT	WT	WT	WT
ACH-000287	NUDUL1_HAEMATOPOIETIC_AND_LYMPHOID_TISSUE	NUDUL1_HAEMATOPOIETIC_AND_LYMPHOID_TISSUE	1330982	SIDM00443	lymphocyte	43.0	male	87.64649975	lymphoid_neoplasm	Caucasian	DSMZ	polymorphic cells growing singly in suspention	85% RPMI 1640 +15% h. i. FBS	nan	~ 30-36 hrs	nan	Lymphoma:NH_B_cell	DLBC			0.0365623			-4.7735	-4.7735			-1.39375	-1.05711	-1.05711	WT	WT	WT	WT	WT	WT	chr17_7577538-7577538_C>T,chr17_7578503-7578503_C>T	other non-conserving,other non-conserving	nan,p.V143M	WT	WT	WT	WT	WT	WT	WT	WT	WT	WT
ACH-001414	UMUC6_URINARY_TRACT			nan	urinary_tract																										chrX_76949415-76949415_C>T	other non-conserving	p.V128I	WT	WT	WT	WT	WT	WT	WT	WT	WT	WT	WT	WT	WT	WT	WT	WT
ACH-000092	NCIH2452_PLEURA	NCIH2452_PLEURA	908462	SIDM00722	lung	nan	male	72.36669085	mesothelioma	Caucasian	ATCC	adherent	RPMI 1640 +10% FBS	5%DMSO	nan	48.4	Lung:Mesothelioma	MESO			0.126012			-2.98837	-4.37573			0.142119	-0.631525	-0.631525	WT	WT	WT	WT	WT	WT	WT	WT	WT	WT	WT	WT	WT	WT	WT	WT	WT	WT	WT
ACH-000176	LOUNH91_LUNG	LOUNH91_LUNG	1298226	SIDM00341	lung	64.0	female	91.72271944	carcinoma	Caucasian	DSMZ	ADHERENT OVOID TO EPITHELOID CELLS GROWING IN MONOLAYERS	RPMI-1640 + 20% FBS	5%DMSO	nan	101.6	Lung:NSCLC_Squamous	LUSC			0.109499			-3.19101	-3.19101			-0.0322288	0.636049	0.636049	WT	WT	WT	WT	WT	WT	chr17_7578503-7578503_C>T	other non-conserving	p.V143M	WT	WT	WT	WT	WT	WT	WT	WT	WT	WT
ACH-002110	EW1_BONE	EW1_BONE	949163	SIDM00205	bone	nan	nan	nan	nan	nan	nan	nan	nan	nan	nan	nan	nan	nan			0.51271			-0.963785	-2.35115			1.884	1.53464	1.53464	WT	WT	WT	WT	WT	WT	chr17_7577121-7577121_G>A	other non-conserving	p.R273C	WT	WT	WT	WT	WT	WT	WT	WT	WT	WT
ACH-000512	INA6_HAEMATOPOIETIC_AND_LYMPHOID_TISSUE			nan	plasma_cell	nan	nan	nan	nan	nan	nan	nan	nan	nan	nan	nan	nan	nan													chrX_76939673-76939674_->T	damaging	p.L359fs	chr6_33287334-33287334_G>A	other non-conserving	p.S588F	chr17_7576855-7576855_G>A,chr17_7578535-7578535_T>A	damaging,other non-conserving	p.Q331*,p.K132M	WT	WT	WT	WT	WT	WT	WT	WT	WT	WT
ACH-002248	IMR5_AUTONOMIC_GANGLIA	IMR5_AUTONOMIC_GANGLIA	907170	SIDM01206	peripheral_nervous_system	nan	nan	nan	nan	nan	nan	nan	nan	nan	nan	nan	nan	NB			0.0408781			-4.61253	-4.61253			-1.25525	-0.884879	-0.884879	WT	WT	WT	WT	WT	WT	WT	WT	WT	WT	WT	WT	WT	WT	WT	WT	WT	WT	WT
ACH-000533	NCIH2004RT_SOFT_TISSUE			nan	soft_tissue	nan	nan	nan	nan	nan	nan	nan	nan	nan	nan	nan	nan	nan													WT	WT	WT	WT	WT	WT	WT	WT	WT	WT	WT	WT	WT	WT	WT	WT	WT	WT	WT
ACH-002317	YT_HAEMATOPOIETIC_AND_LYMPHOID_TISSUE	YT_HAEMATOPOIETIC_AND_LYMPHOID_TISSUE	946358	SIDM00410	leukemia	nan	nan	nan	nan	nan	nan	nan	nan	nan	nan	nan	nan	ALL			0.173553			-2.52655	-2.52655			0.539449	1.34697	1.34697	WT	WT	WT	WT	WT	WT	WT	WT	WT	WT	WT	WT	WT	WT	WT	WT	WT	WT	WT
ACH-001735	SEMK2_HAEMATOPOIETIC_AND_LYMPHOID_TISSUE			nan	blood																										WT	WT	WT	WT	WT	WT	chr17_7579312-7579312_C>T	damaging	p.T125T	WT	WT	WT	WT	WT	WT	WT	WT	WT	WT
ACH-000799	HS695T_SKIN			nan	skin	26.0	male	167.0747294	malignant_melanoma	Caucasian	ATCC	Adherent	EMEM +10%FBS	5% DMSO	nan	148.6	Skin:Melanoma	SKCM		0.0229535			-5.44514				-0.455747				chrX_76939673-76939674_->T	damaging	p.L359fs	WT	WT	WT	WT	WT	WT	WT	WT	WT	WT	WT	WT	chr7_140453136-140453136_A>T	other non-conserving	p.V600E	WT
ACH-000116	OAW28_OVARY	OAW28_OVARY	946360	SIDM00481	ovary	nan	female	83.53376636	carcinoma	Caucasian	ECACC	nan	nan	nan	nan	nan	Ovary:Carcinoma	OV			0.0295166			-5.08233	-5.08233			-1.65946	-1.38754	-1.38754	WT	WT	WT	WT	WT	WT	chr17_7578475-7578475_G>-	damaging	p.P153fs	WT	WT	WT	WT	WT	WT	WT	WT	WT	WT
ACH-000606	PECAPJ34CLONEC12_UPPER_AERODIGESTIVE_TRACT			nan	upper_aerodigestive	60.0	male	131.7594832	carcinoma	Caucasian	ECACC	nan	nan	nan	nan	nan	Upper_Aerodigestive_Tract:Carcinoma	HNSC													WT	WT	WT	WT	WT	WT	chr17_7578454-7578454_G>A	other non-conserving	p.A159V	WT	WT	WT	WT	WT	WT	WT	WT	WT	WT
ACH-001608	NP2_CENTRAL_NERVOUS_SYSTEM			nan	central_nervous_system																										WT	WT	WT	WT	WT	WT	chr17_7577570-7577570_C>T	other non-conserving	p.M237I	WT	WT	WT	WT	WT	WT	WT	WT	WT	chr17_8135694-8135694_T>C
ACH-000738	GB1_CENTRAL_NERVOUS_SYSTEM	GB1_CENTRAL_NERVOUS_SYSTEM	687568	SIDM00581	central_nervous_system	35.0	male	165.5943803	glioma	Asian	HSSRB	nan	Dulbecco's modified Eagle's medium with 10% fetal calf serum	nan	nan	nan	CNS:Glioma_HighGrade	GBM	2.69051		0.13057	1.42788		-2.9371	-4.32447	-0.142438		0.186223	-0.576678	-0.359558	WT	WT	WT	WT	WT	WT	chr17_7577564-7577565_->TTA	other non-conserving	p.239_239N>NN	WT	WT	WT	WT	WT	WT	WT	WT	WT	chr17_8131830-8131830_C>T
ACH-000543	SNU489_CENTRAL_NERVOUS_SYSTEM			nan	central_nervous_system	54.0	male	177.451507	glioma	Asian	KCLB	spindle; monolayer	RPMI 1640 with L-glutamine (300mg/L), 90%; heat inactivated fetal bovine serum (FBS),10%	nan	48 hrs	nan	CNS:Glioma_HighGrade	GBM		0.0250874			-5.3169				-0.191745				WT	WT	WT	WT	WT	WT	chr17_7574034-7574034_C>G	damaging	nan	WT	WT	WT	WT	WT	WT	WT	WT	WT	WT
ACH-001011	ACCS_URINARY_TRACT			SIDM01166	urinary_tract	81.0	female	nan	carcinoma	nan	nan	nan	nan	nan	nan	nan	nan	BLCA													WT	WT	WT	chr6_33288304-33288304_G>A	silent	p.A368A	chr17_7578552-7578552_G>C	damaging	p.Y126*	WT	WT	WT	WT	WT	WT	WT	WT	WT	WT
ACH-000397	TEN_ENDOMETRIUM			nan	uterus	74.0	female	147.1543657	carcinoma	Asian	RIKEN	nan	MEM + 10% FBS	5%DMSO	nan	178.9	Endometrium:Carcinoma	UCEC		0.0228017			-5.45471				-0.475452				WT	WT	WT	WT	WT	WT	chr17_7574003-7574003_G>A	damaging	p.R342*	WT	WT	WT	WT	WT	WT	WT	WT	WT	WT
ACH-000305	ECGI10_OESOPHAGUS	ECGI10_OESOPHAGUS	753555	SIDM00278	esophagus	65.0	male	120.37911229999999	carcinoma	Asian	RIKEN	epithelial-like	HamF12+10%FBS	nan	nan	nan	Oesophagus:Carcinoma	ESCA			0.0966336			-3.37133	-4.7587			-0.187371	-1.04127	-1.04127	WT	WT	WT	WT	WT	WT	chr17_7577120-7577120_C>A,chr17_7577580-7577580_T>C	other non-conserving,other non-conserving	p.R273L,p.Y234C	WT	WT	WT	WT	WT	WT	WT	WT	WT	WT
ACH-002446	CCLFUPGI0005T_STOMACH			nan	gastric																										WT	WT	WT	chr6_33289536-33289536_T>G	other non-conserving	p.K56T	chr17_7578551-7578551_A>G	other non-conserving	p.S127P	WT	WT	WT	WT	WT	WT	WT	WT	WT	WT
ACH-000192	MFE280_ENDOMETRIUM	MFE280_ENDOMETRIUM	908129	SIDM00335	uterus	77.0	female	86.69118242	carcinoma	Caucasian	NIBRI	nan	nan	nan	nan	nan	Endometrium:Carcinoma	UCEC	1.15338		0.0218474	0.205866		-5.51639	-5.51639	-1.4132		-2.03291	-1.85196	-1.63258	WT	WT	WT	WT	WT	WT	chr17_7577018-7577018_C>G	damaging	nan	WT	WT	WT	WT	WT	WT	WT	WT	WT	WT
ACH-000956	22RV1_PROSTATE	22RV1_PROSTATE	924100	SIDM00499	prostate	nan	male	539.8308684	carcinoma	Caucasian	ATCC	Adherent epithelial	RPMI-1640+10% FBS	5%DMSO	nan	58.4	Prostate:Carcinoma	PRAD	3.41358	0.0287304	0.067957	1.77129	-5.12128	-3.87923	-3.87923	0.214667	0.210945	-0.624353	-0.100304	0.0571814	WT	WT	WT	WT	WT	WT	chr17_7576854-7576854_T>C,chr17_7579471-7579471_G>-	damaging,damaging	p.Q331R,p.P72fs	WT	WT	WT	WT	WT	WT	chr7_140453145-140453145_A>C	other non-conserving	p.L597R	WT
ACH-000030	PC14_LUNG	PC14_LUNG	753608	SIDM00237	lung	nan	nan	151.0705525	carcinoma	Asian	RIKEN	adherent	RPMI+10%FBS	5%DMSO	nan	35.2966	Lung:NSCLC_Others	LUAD	6.72466		0.530007	2.74946		-0.915917	-2.30328	1.23187		1.92518	1.58586	1.40886	WT	WT	WT	WT	WT	WT	chr17_7577538-7577538_C>T	other non-conserving	nan	WT	WT	WT	WT	WT	WT	WT	WT	WT	WT
ACH-000215	LN382_CENTRAL_NERVOUS_SYSTEM			nan	central_nervous_system	nan	male	87.23638256	glioma	Caucasian	nan	nan	nan	nan	nan	nan	nan	nan													WT	WT	WT	WT	WT	WT	chr17_7578260-7578260_C>G	other non-conserving	p.V197L	WT	WT	WT	WT	WT	WT	WT	WT	WT	WT
ACH-000813	T3M10_LUNG			nan	lung	40.0	male	235.95764269999998	carcinoma	Asian	GNF	nan	nan	nan	nan	nan	Lung:NSCLC_Large_Cell	nan		0.0152341			-6.03655				-1.67322				WT	WT	WT	WT	WT	WT	chr17_7578449-7578449_C>T	other non-conserving	p.A161T	WT	WT	WT	WT	WT	WT	chr7_140500166-140500166_T>C	other non-conserving	p.I326V	WT
ACH-000163	SW579_THYROID			SIDM01167	thyroid	59.0	male	90.3074789	carcinoma	Caucasian	GNF	nan	nan	nan	nan	45.0	Thyroid:Carcinoma	THCA	3.42097	0.024312		1.77441	-5.36219			0.217912	-0.284983			0.217912	WT	WT	WT	WT	WT	WT	chr17_7577517-7577517_A>C	other non-conserving	p.I255S	WT	WT	WT	WT	WT	WT	WT	WT	WT	WT
ACH-000912	NCIH2286_LUNG			SIDM00017	lung	57.0	female	316.77103660000006	carcinoma	Caucasian	nan	nan	nan	nan	nan	77.8	Lung:SCLC	SCLC	4.76339	0.0205888		2.25199	-5.602			0.714548	-0.778651			0.714548	WT	WT	WT	WT	WT	WT	chr17_7577067-7577067_T>A	damaging	p.K291*	chr3_10191637-10191637_G>T	silent	p.R210R	WT	WT	WT	WT	WT	WT	WT
ACH-000360	NCIH508_LARGE_INTESTINE	NCIH508_LARGE_INTESTINE	908442	SIDM00777	colorectal	55.0	male	94.03118402	carcinoma	Caucasian	NIBRI	nan	nan	nan	nan	nan	Colorectal:Carcinoma	COAD/READ	3.18393		0.058551	1.67081		-4.09416	-4.09416	0.110183		-0.80927	-0.330263	-0.11004	WT	WT	WT	WT	WT	WT	chr17_7577120-7577120_C>T	other non-conserving	p.R273H	WT	WT	WT	WT	WT	WT	chr7_140453149-140453149_C>G	other non-conserving	p.G596R	WT
ACH-000377	SNU478_BILIARY_TRACT			SIDM00160	bile_duct	nan	nan	128.9700561	carcinoma	Asian	KCLB	epithelial; monolayer	RPMI 1640 with L-glutamine (300mg/L), 90%; heat inactivated fetal bovine serum (FBS),10%	nan	52 hrs	nan	Biliary_Tract:Carcinoma	nan		0.0244278			-5.35533				-0.270873				WT	WT	WT	WT	WT	WT	chr17_7577139-7577140_->A	damaging	p.R267fs	WT	WT	WT	WT	WT	WT	WT	WT	WT	WT
ACH-001719	OCIC4P_OVARY			nan	ovary																										chrX_76939092-76939092_A>T,chrX_76953080-76953080_C>T	silent,other non-conserving	p.T552T,p.R78Q	chr6_33287364-33287364_G>A	other non-conserving	p.T578I	chr17_7574003-7574003_G>A	damaging	p.R342*	WT	WT	WT	WT	WT	WT	WT	WT	WT	WT
ACH-002366	NCIBL2009_MATCHED_NORMAL_TISSUE	NCIBL2009_Matched_Normal_Tissue		SIDM00736	non_cancerous																0.0778284			-3.68356	-3.68356			-0.456001	0.109054	0.109054	WT	WT	WT	WT	WT	WT	WT	WT	WT	WT	WT	WT	WT	WT	WT	WT	WT	WT	WT
ACH-000418	SW1353_BONE			nan	bone	72.0	female	104.8362941	chondrosarcoma	Caucasian	NIBRI	Adherent Fibroblast	RPMI1640 + 10%FBS	nan	nan	101.3	Bone:Sarcoma_Chondro	SARC		0.022189			-5.49401				-0.556355				WT	WT	WT	WT	WT	WT	chr17_7578242-7578242_C>A	other non-conserving	p.V203L	WT	WT	WT	WT	WT	WT	WT	WT	WT	WT
ACH-000352	HCC1428_BREAST	HCC1428_BREAST	1290905	SIDM00881	breast	49.0	female	102.37343059999999	carcinoma	Caucasian	ATCC	Adherent; large epithelial cells with occasional vacuole formation	RPMI-1640+10% FBS	5%DMSO	nan	81.4	Breast:Carcinoma	BRCA	1.89818		0.201588	0.924614		-2.31052	-3.69788	-0.665783		0.725317	0.0937274	-0.286028	WT	WT	WT	WT	WT	WT	WT	WT	WT	WT	WT	WT	WT	WT	WT	WT	WT	WT	WT
ACH-000869	NCIH1568_LUNG	NCIH1568_LUNG	1298348	SIDM00750	lung	48.0	female	238.76189449999998	carcinoma	Caucasian	ATCC	adherent	RPMI+10%FBS	5% DMSO	nan	67.0	Lung:NSCLC_Adeno	LUAD			0.339005			-1.56062	-2.94799			1.3705	0.896066	0.896066	WT	WT	WT	WT	WT	WT	chr17_7578394-7578394_T>C	other non-conserving	p.H179R	WT	WT	WT	WT	WT	WT	WT	WT	WT	WT
ACH-001843	ICC3_BILIARY_TRACT			nan	bile_duct																										WT	WT	WT	WT	WT	WT	WT	WT	WT	WT	WT	WT	WT	WT	WT	WT	WT	WT	WT
ACH-002378	HCC1143_MATCHED_NORMAL_TISSUE	HCC1143_Matched_Normal_Tissue		SIDM00868	non_cancerous																0.0373134			-4.74416	-4.74416			-1.36851	-1.02572	-1.02572
ACH-002027	HOUAI_ENDOMETRIUM			nan	uterus																										WT	WT	WT	WT	WT	WT	WT	WT	WT	WT	WT	WT	WT	WT	WT	WT	WT	WT	WT
ACH-000413	HS739T_FIBROBLAST			nan	fibroblast	52.0	female	147.00671709999997	carcinoma	Asian	nan	nan	nan	nan	nan	nan	nan	nan													chrX_76939673-76939674_->T	damaging	p.L359fs	WT	WT	WT	WT	WT	WT	WT	WT	WT	WT	WT	WT	WT	WT	WT	WT
ACH-000721	HMC18_BREAST			nan	breast	35.0	female	204.8327614	carcinoma	Asian	HSSRB	Adherent	RPMI 1640 +10%FBS	5% DMSO	nan	63.3	Breast:Carcinoma	BRCA		0.0371314			-4.75122				0.97275				WT	WT	WT	WT	WT	WT	chr17_7578475-7578475_G>-	damaging	p.P153fs	WT	WT	WT	WT	WT	WT	WT	WT	WT	WT
ACH-001283	TC106_BONE			nan	bone																										WT	WT	WT	WT	WT	WT	chr17_7578177-7578177_C>A	damaging	p.E224D	WT	WT	WT	WT	WT	WT	WT	WT	WT	WT
ACH-000296	OUMS23_LARGE_INTESTINE			SIDM00036	colorectal	nan	nan	137.2592429	carcinoma	Asian	HSSRB	epithelial-like	Dulbecco's modified Eagle's medium with 10% fetal bovine serum	nan	nan	nan	Colorectal:Carcinoma	COAD/READ													WT	WT	WT	WT	WT	WT	chr17_7577580-7577580_T>C	other non-conserving	p.Y234C	WT	WT	WT	WT	WT	WT	chr7_140453136-140453136_A>T,chr7_140500282-140500282_C>T	other non-conserving,damaging	p.V600E,nan	WT
ACH-000100	RH41_SOFT_TISSUE	RH41_SOFT_TISSUE	1240210	SIDM00426	soft_tissue	nan	female	85.54240658	rhabdomyosarcoma	Caucasian	DSMZ	adherent, epithelial-like cells growing as monolayers	90% RPMI 1640 +10% h,i, FBS	nan	~ 2-3 days	nan	Soft_Tissue:Sarcoma_Rhabdoid	SARC			2.29022			1.19549	-0.19188			3.74176	3.84492	3.84492	WT	WT	WT	WT	WT	WT	chr17_7578464-7578476_GGGTGCCGGGCGG>-	damaging	p.PPGTR152fs	WT	WT	WT	WT	WT	WT	WT	WT	WT	WT
ACH-002338	M980513_SKIN			SIDM00177	skin																										WT	WT	WT	WT	WT	WT	WT	WT	WT	WT	WT	WT	WT	WT	WT	chr7_140453136-140453136_A>T	other non-conserving	p.V600E	WT
ACH-002069	HSOS1_BONE			nan	bone																										WT	WT	WT	WT	WT	WT	WT	WT	WT	WT	WT	WT	WT	WT	WT	WT	WT	WT	WT
ACH-001146	OCILY10_HAEMATOPOIETIC_AND_LYMPHOID_TISSUE			nan	lymphocyte	nan	nan	nan	lymphoid_neoplasm	Caucasian	nan	nan	nan	nan	nan	nan	nan	DLBC													chrX_76949407-76949407_T>C	silent	p.P130P	WT	WT	WT	chr17_7576891-7576891_T>A	damaging	p.K319*	WT	WT	WT	WT	WT	WT	WT	WT	WT	WT
ACH-001229	UPCISCC154_UPPER_AERODIGESTIVE_TRACT			nan	upper_aerodigestive																										WT	WT	WT	WT	WT	WT	WT	WT	WT	WT	WT	WT	WT	WT	WT	WT	WT	WT	WT
ACH-000911	NUGC3_STOMACH	NUGC3_STOMACH	908455	SIDM00572	gastric	72.0	male	334.9102022	carcinoma	Asian	JHSF	Epithelial-like	RPMI1640+10%FBS	5%DMSO	nan	34.2	Gastric:Carcinoma	STAD	2.80679		0.175807	1.48892		-2.50794	-3.8953	-0.0789632		0.555465	-0.117496	-0.0982295	WT	WT	WT	chr6_33287368-33287368_C>A	other non-conserving	p.D577Y	chr17_7578190-7578190_T>C	other non-conserving	p.Y220C	WT	WT	WT	WT	WT	WT	WT	WT	WT	WT
ACH-000070	697_HAEMATOPOIETIC_AND_LYMPHOID_TISSUE	697_HAEMATOPOIETIC_AND_LYMPHOID_TISSUE	906800	SIDM01076	blood	12.0	male	75.69945569	lymphoid_neoplasm	Caucasian	DSMZ	adherent	RPMI + 10 % FBS	5% DMSO	nan	46.6	Leukemia:ALL	ALL			0.784608			-0.349956	-1.73732			2.41212	2.1914	2.1914	WT	WT	WT	WT	WT	WT	WT	WT	WT	WT	WT	WT	WT	WT	WT	WT	WT	WT	WT
ACH-000990	HEC108_ENDOMETRIUM			nan	uterus	nan	female	1579.742482	carcinoma	Asian	HSSRB	nan	nan	nan	nan	63.0	Endometrium:Carcinoma	UCEC		0.0192714			-5.69739				-0.975029				chrX_76849213-76849213_T>C,chrX_76953087-76953087_A>G	silent,other non-conserving	p.V2021V,p.S76P	chr6_33289544-33289544_C>T	silent	p.S53S	chr17_7573993-7573993_T>C,chr17_7578478-7578478_G>T	other non-conserving,other non-conserving	p.N345S,p.P151H	WT	WT	WT	chr2_209106739-209106739_G>A,chr2_209110061-209110061_G>A	damaging,silent	p.Q277*,p.L168L	WT	WT	WT	chr17_8136326-8136326_A>G
ACH-001622	ONDA7_CENTRAL_NERVOUS_SYSTEM			nan	central_nervous_system																										WT	WT	WT	WT	WT	WT	WT	WT	WT	WT	WT	WT	WT	WT	WT	WT	WT	WT	chr17_8131629-8131629_G>A
ACH-000384	SW780_URINARY_TRACT	SW780_URINARY_TRACT	687457	SIDM01160	urinary_tract	80.0	female	93.14475754	carcinoma	Caucasian	ATCC	Adherent	L15 + 10% FBS	5% DMSO	nan	92.9	Bladder:Carcinoma	BLCA			0.165534			-2.5948	-3.98217			0.48073	-0.210435	-0.210435	WT	WT	WT	WT	WT	WT	WT	WT	WT	WT	WT	WT	WT	WT	WT	WT	WT	WT	WT
ACH-002143	ISTMEL1_SKIN	ISTMEL1_SKIN	907172	SIDM00225	skin	nan	nan	nan	nan	nan	nan	nan	nan	nan	nan	nan	nan	SKCM			0.200797			-2.31619	-3.70356			0.720437	0.0876587	0.0876587	WT	WT	WT	WT	WT	WT	chr17_7577539-7577539_G>A,chr17_7577540-7577540_G>T	other non-conserving,other non-conserving	p.R248W,p.N247K	WT	WT	WT	WT	WT	WT	chr7_140453136-140453136_A>T	other non-conserving	p.V600E	WT
ACH-001791	LPS6_SOFT_TISSUE			nan	soft_tissue																										WT	WT	WT	WT	WT	WT	WT	WT	WT	WT	WT	WT	WT	WT	WT	WT	WT	WT	WT
ACH-000452	TE8_OESOPHAGUS	TE8_OESOPHAGUS	753623	SIDM00326	esophagus	nan	nan	120.1788709	carcinoma	Asian	RIKEN	epithelial-like	RPMI 1640 +10%FBS	nan	nan	nan	Oesophagus:Carcinoma	ESCA			0.214274			-2.22247	-3.60984			0.801069	0.187932	0.187932	WT	WT	WT	WT	WT	WT	chr17_7577570-7577570_C>A,chr17_7578190-7578190_T>C	other non-conserving,other non-conserving	p.M237I,p.Y220C	WT	WT	WT	WT	WT	WT	WT	WT	WT	WT
ACH-002121	GMEL_SKIN	GMEL_SKIN	1240130	SIDM00129	skin	nan	nan	nan	nan	nan	nan	nan	nan	nan	nan	nan	nan	SKCM			0.093397			-3.42048	-3.42048			-0.229657	0.390532	0.390532	WT	WT	WT	WT	WT	WT	WT	WT	WT	WT	WT	WT	WT	WT	WT	chr7_140434423-140434423_C>A,chr7_140453136-140453136_A>T	damaging,other non-conserving	p.G759*,p.V600E	WT
ACH-002340	NBSUSSR_AUTONOMIC_GANGLIA	NBSUSSR_AUTONOMIC_GANGLIA		SIDM00002	peripheral_nervous_system	nan	nan	nan	nan	nan	nan	nan	nan	nan	nan	nan	nan	NB			0.0349668			-4.83787	-4.83787			-1.44913	-1.12598	-1.12598	WT	WT	WT	WT	WT	WT	chr17_7578212-7578212_G>A	damaging	p.R213*	WT	WT	WT	WT	WT	WT	WT	WT	WT	WT
ACH-000916	NCIH1573_LUNG	NCIH1573_LUNG	908472	SIDM00749	lung	35.0	female	337.2852014	carcinoma	Caucasian	ATCC	Adherent	DMEM/F12(1:1) +10 % FBS	5% DMSO	nan	118.2	Lung:NSCLC_Adeno	LUAD			0.113897			-3.1342	-4.52156			0.0166503	-0.787555	-0.787555	WT	WT	WT	WT	WT	WT	chr17_7577538-7577538_C>A	other non-conserving	p.R248L	WT	WT	WT	WT	WT	WT	WT	WT	WT	WT
ACH-002323	HCC2688_BREAST			nan	breast
ACH-001557	MERO41_PLEURA			nan	lung																										WT	WT	WT	WT	WT	WT	WT	WT	WT	WT	WT	WT	WT	WT	WT	WT	WT	WT	WT
ACH-001300	CHLA15_AUTONOMIC_GANGLIA			nan	peripheral_nervous_system																										WT	WT	WT	WT	WT	WT	WT	WT	WT	WT	WT	WT	WT	WT	WT	WT	WT	WT	WT
ACH-000244	DKMG_CENTRAL_NERVOUS_SYSTEM	DKMG_CENTRAL_NERVOUS_SYSTEM	906839	SIDM00947	central_nervous_system	67.0	female	73.93675728	glioma	Caucasian	DSMZ	SPINDLE, FIBROBLAST-LIKE CELLS GROWING MOSTLY ADHERENT AS MONOLAYER	RPMI-1640+10% FBS	5% DMSO	50 hrs	77.7	CNS:Glioma_HighGrade	GBM			0.13995			-2.83702	-4.22438			0.272335	-0.46959	-0.46959	WT	WT	WT	WT	WT	WT	WT	WT	WT	WT	WT	WT	WT	WT	WT	WT	WT	WT	WT
ACH-002295	PCI30_UPPER_AERODIGESTIVE_TRACT	PCI30_UPPER_AERODIGESTIVE_TRACT	1298529	SIDM00044	upper_aerodigestive	nan	nan	nan	nan	nan	nan	nan	nan	nan	nan	nan	nan	HNSC			0.199032			-2.32893	-2.32893			0.709478	1.55842	1.55842	chrX_76937243-76937243_T>G	other non-conserving	p.K1169Q	WT	WT	WT	chr17_7578474-7578475_->G	damaging	p.P152fs	WT	WT	WT	WT	WT	WT	WT	WT	WT	WT
ACH-000752	NCIH196_LUNG	NCIH196_LUNG	1240186	SIDM00761	lung	68.0	male	168.9440631	carcinoma	Caucasian	ATCC	Adherent	RPMI+10%FBS	5% DMSO	nan	75.3	Lung:SCLC	SCLC	1.76613		0.122037	0.820593		-3.03461	-4.42198	-0.773953		0.102333	-0.681001	-0.727477	WT	WT	WT	WT	WT	WT	chr17_7578406-7578406_C>T	other non-conserving	p.R175H	WT	WT	WT	WT	WT	WT	WT	WT	WT	WT
ACH-000545	VMCUB1_URINARY_TRACT	VMCUB1_URINARY_TRACT	909780	SIDM00414	urinary_tract	nan	male	98.84264251	carcinoma	Caucasian	DSMZ	Adherent	DMEM +10%FBS	0.05	nan	63.3	Bladder:Carcinoma	BLCA	4.48481		0.376349	2.16505		-1.40986	-2.79722	0.624136		1.50021	1.05737	0.840755	WT	WT	WT	WT	WT	WT	chr17_7578406-7578406_C>T	other non-conserving	p.R175H	WT	WT	WT	WT	WT	WT	WT	WT	WT	WT
ACH-001172	R256_CENTRAL_NERVOUS_SYSTEM			nan	central_nervous_system																										WT	WT	WT	WT	WT	WT	chr17_7577120-7577120_C>T	other non-conserving	p.R273H	WT	WT	WT	WT	WT	WT	WT	WT	WT	WT
ACH-000985	LS411N_LARGE_INTESTINE	LS411N_LARGE_INTESTINE	907794	SIDM00660	colorectal	32.0	male	1024.430529	carcinoma	Caucasian	ATCC	adherent epithelial	RPMI-1640+10% FBS	5% DMSO	nan	69.9	Colorectal:Carcinoma	COAD/READ	1.75947		0.117886	0.815143		-3.08454	-4.4719	-0.779621		0.0593784	-0.734419	-0.75702	chrX_76764039-76764039_C>T,chrX_76944330-76944330_A>G	silent,other non-conserving	p.Q2423Q,p.L192S	WT	WT	WT	chr17_7578552-7578552_G>T	damaging	p.Y126*	WT	WT	WT	chr2_209119127-209119127_G>A	damaging	nan	chr7_140453136-140453136_A>T	other non-conserving	p.V600E	WT
ACH-000280	SNU840_OVARY			nan	ovary	45.0	female	124.2318571	carcinoma	Asian	KCLB	ADHERENT, EPITHELIAL MONOLAYER	RPMI-1640+10% FBS	5%DMSO	40	36.9	Ovary:Germline	OV													WT	WT	WT	WT	WT	WT	WT	WT	WT	WT	WT	WT	WT	WT	WT	WT	WT	WT	WT
ACH-001037	CMK86_HAEMATOPOIETIC_AND_LYMPHOID_TISSUE			nan	blood	nan	nan	nan	haematopoietic_neoplasm	Asian	nan	nan	nan	nan	nan	nan	nan	LAML
ACH-000987	MEWO_SKIN	MEWO_SKIN	908128	SIDM00545	skin	78.0	male	1032.474137	malignant_melanoma	Caucasian	GNF	nan	nan	nan	nan	nan	Skin:Melanoma	SKCM			0.0950263			-3.39553	-4.7829			-0.20819	-1.06716	-1.06716	WT	WT	WT	chr6_33288893-33288893_G>A,chr6_33289195-33289195_C>G	other non-conserving,silent	p.S220F,p.R119R	chr17_7576897-7576897_G>A,chr17_7577509-7577509_C>T	damaging,other non-conserving	p.Q317*,p.E258K	chr3_10183645-10183645_C>T	silent	p.S38S	WT	WT	WT	chr7_140501307-140501307_A>G	silent	p.L255L	WT
ACH-002155	LB996RCC_KIDNEY	LB996RCC_KIDNEY	753585	SIDM00180	kidney	nan	nan	nan	nan	nan	nan	nan	nan	nan	nan	nan	nan	KIRC			0.0681585			-3.87496	-3.87496			-0.620678	-0.0957342	-0.0957342	WT	WT	WT	WT	WT	WT	WT	WT	WT	WT	WT	WT	WT	WT	WT	WT	WT	WT	WT
ACH-000548	BHY_UPPER_AERODIGESTIVE_TRACT	BHY_UPPER_AERODIGESTIVE_TRACT	753535	SIDM00986	upper_aerodigestive	52.0	male	158.748475	carcinoma	Asian	DSMZ	epithelial- like polygonal or round and flat cells (sometimes spindle- form, very heterogenous) growing in monolayers	DMEM + 10% FBS	10%DMSO	~ 70 hrs	67.6	Upper_Aerodigestive_Tract:Carcinoma	HNSC			0.0328225			-4.92917	-4.92917			-1.52768	-1.22367	-1.22367	chrX_76939673-76939674_->T	damaging	p.L359fs	WT	WT	WT	chr17_7579336-7579336_C>-	damaging	p.G117fs	WT	WT	WT	WT	WT	WT	chr7_140624404-140624415_CGGCGCCGGCGC>-	other non-conserving	p.GAGA30del	WT
ACH-000625	HEP3B217_LIVER	HEP3B217_LIVER	1240147	SIDM00672	liver	8.0	male	135.45953980000002	carcinoma	African_american	nan	adherent	EMEM+10%FBS	5%DMSO	nan	nan	Liver:HCC	LIHC		0.0211109	0.0738266		-5.56587	-3.75972	-3.75972		-0.704272	-0.521523	0.0275724	0.0275724	WT	WT	WT	WT	WT	WT	WT	WT	WT	WT	WT	WT	WT	WT	WT	WT	WT	WT	WT
ACH-000863	DBTRG05MG_CENTRAL_NERVOUS_SYSTEM	DBTRG05MG_CENTRAL_NERVOUS_SYSTEM	906835	SIDM00867	central_nervous_system	59.0	female	204.71313700000002	glioma	Caucasian	ATCC	ADHERENT FIBROBLAST	RPMI-1640+10% FBS	5% DMSO	nan	54.2	CNS:Glioma_HighGrade	GBM			0.233364			-2.09935	-3.48671			0.907002	0.319667	0.319667	WT	WT	WT	WT	WT	WT	WT	WT	WT	WT	WT	WT	WT	WT	WT	chr7_140453136-140453136_A>T	other non-conserving	p.V600E	WT
ACH-000708	SNU283_LARGE_INTESTINE	SNU283_LARGE_INTESTINE	1659929	SIDM00215	colorectal	62.0	female	nan	carcinoma	Asian	KCLB	epithelial; monolayer, clumping	RPMI 1640 with L-glutamine (300mg/L), 90%; heat inactivated fetal bovine serum (FBS),10%	nan	42 hrs	nan	Colorectal:Carcinoma	COAD/READ		0.0291865	0.0706754		-5.09855	-3.82265	-3.82265		0.257729	-0.575668	-0.0397612	-0.0397612	WT	WT	WT	WT	WT	WT	WT	WT	WT	WT	WT	WT	WT	WT	WT	WT	WT	WT	WT
ACH-000094	HPAFII_PANCREAS	HPAFII_PANCREAS	724869	SIDM00669	pancreas	44.0	male	85.29688898	carcinoma	Caucasian	ATCC	ADHERENT EPITHELIAL;	EMEM+10% FBS	5%DMSO	nan	79.0	Pancreas:Carcinoma	PAAD			0.0615531			-4.02202	-4.02202			-0.747205	-0.253081	-0.253081	chrX_76939673-76939674_->T	damaging	p.L359fs	WT	WT	WT	chr17_7578479-7578479_G>A	other non-conserving	p.P151S	WT	WT	WT	WT	WT	WT	WT	WT	WT	WT
ACH-000608	COV644_OVARY			nan	ovary	nan	female	94.67991690000001	carcinoma	Caucasian	ECACC	Adherent polygonal and fusiform	DMEM+10%FBS	?	nan	190.0	Ovary:Carcinoma	OV	7.28073			2.86408				1.35106				1.35106	WT	WT	WT	WT	WT	WT	chr17_7590694-7590694_C>A	damaging	nan	WT	WT	WT	WT	WT	WT	WT	WT	WT	WT
ACH-002174	NCIH720_LUNG	NCIH720_LUNG	687600	SIDM01120	lung	nan	nan	nan	nan	nan	nan	nan	nan	nan	nan	nan	nan	nan			0.119637			-3.06326	-3.06326			0.0776794	0.772728	0.772728	WT	WT	WT	chr6_33286842-33286843_AG>-	damaging	p.C699fs	chr17_7578402-7578402_G>C	other non-conserving	p.C176W	WT	WT	WT	WT	WT	WT	WT	WT	WT	WT
ACH-002219	COLO320HSR_LARGE_INTESTINE		910569	SIDM00842	colorectal
ACH-000295	EM2_HAEMATOPOIETIC_AND_LYMPHOID_TISSUE	EM2_HAEMATOPOIETIC_AND_LYMPHOID_TISSUE	906855	SIDM01047	blood	5.0	female	117.0396003	haematopoietic_neoplasm	Caucasian	DSMZ	single, round to oval cells in suspention	90% RPMI 1640 +10% h.i. FBS	nan	~ 35-40 hrs	65.8	Leukemia:CML	LCML			0.0490879			-4.34849	-4.34849			-1.02808	-0.602375	-0.602375	WT	WT	WT	WT	WT	WT	chr17_7577538-7577538_C>T	other non-conserving	nan	WT	WT	WT	WT	WT	WT	WT	WT	WT	WT
ACH-000255	LMSU_STOMACH			nan	gastric	nan	nan	127.4914675	carcinoma	Asian	RIKEN	epithelial-like	HamF10 +10% FBS	nan	nan	nan	Gastric:Carcinoma	STAD		0.0269007			-5.21621				0.0155206				WT	WT	WT	WT	WT	WT	chr17_7578406-7578406_C>T	other non-conserving	p.R175H	WT	WT	WT	WT	WT	WT	WT	WT	WT	WT
ACH-000982	GP2D_LARGE_INTESTINE			SIDM00536	colorectal	71.0	female	953.9152083999999	carcinoma	Caucasian	ECACC	Epithelial adherent	DMEM+10%FBS	?	nan	77.1	Colorectal:Carcinoma	COAD/READ	13.5485			3.76006				2.28279				2.28279	chrX_76938192-76938192_A>T,chrX_76939674-76939674_T>-	other non-conserving,damaging	p.D852E,p.K358fs	WT	WT	WT	WT	WT	WT	WT	WT	WT	WT	WT	WT	chr7_140476821-140476821_T>C	other non-conserving	p.T529A	chr17_8136282-8136282_G>A
ACH-001279	SCCOHT1_OVARY			nan	ovary																										WT	WT	WT	WT	WT	WT	WT	WT	WT	WT	WT	WT	WT	WT	WT	WT	WT	WT	WT
ACH-000977	LNCAPCLONEFGC_PROSTATE	LNCAPCLONEFGC_PROSTATE	907788	SIDM00683	prostate	50.0	male	826.0027861000001	carcinoma	Caucasian	NIBRI	nan	nan	nan	nan	53.0	Prostate:Carcinoma	PRAD		0.0220981	0.055211		-5.49993	-4.1789	-4.1789		-0.568539	-0.882176	-0.420927	-0.420927	chrX_76778785-76778787_TCT>-	other non-conserving	p.2264_2265EE>E	chr6_33289030-33289030_A>G	silent	p.T174T	chr17_7578474-7578474_C>T	silent	p.P152P	WT	WT	WT	WT	WT	WT	WT	WT	WT	chr17_8132653-8132653_C>A,chr17_8135228-8135228_T>A
ACH-000410	SAOS2_BONE	SAOS2_BONE	909707	SIDM01084	bone	11.0	female	109.36011770000002	osteosarcoma	Caucasian	NIBRI	Adherent epithelial	McCoy's 5A +15%FBS	5%DMSO	nan	181.8	Bone:Sarcoma_Osteo	SARC			0.371238			-1.42958	-2.81695			1.48324	1.03627	1.03627	WT	WT	WT	WT	WT	WT	WT	WT	WT	WT	WT	WT	WT	WT	WT	WT	WT	WT	WT
ACH-001538	KKU213_BILIARY_TRACT			nan	bile_duct																										WT	WT	WT	WT	WT	WT	chr17_7579705-7579705_C>T	other non-conserving	p.V31I	WT	WT	WT	WT	WT	WT	WT	WT	WT	WT
ACH-002046	HTMMT_ENDOMETRIUM			nan	uterus																										WT	WT	WT	WT	WT	WT	chr17_7577120-7577120_C>T	other non-conserving	p.R273H	WT	WT	WT	WT	WT	WT	WT	WT	WT	WT
ACH-001138	NCIH2141_LUNG	NCIH2141_LUNG	688014	SIDM00699	lung	58.0	male	nan	carcinoma	Caucasian	ATCC	suspension; lots of debris	DMEM:HAM's F12 1:1 + 5% FBS	5%DMSO	nan	136.0	nan	SCLC			0.044094			-4.50327	-4.50327			-1.16126	-0.767985	-0.767985	WT	WT	WT	WT	WT	WT	chr17_7578224-7578224_T>A	damaging	p.R209*	WT	WT	WT	WT	WT	WT	WT	WT	WT	WT
ACH-000655	SF268_CENTRAL_NERVOUS_SYSTEM	SF268_CENTRAL_NERVOUS_SYSTEM	905986	SIDM00085	central_nervous_system	nan	nan	157.80960269999997	glioma	Caucasian	Garraway Lab	Mix	RPMI-1640+ 5% FBS	5% DMSO	nan	63.0	CNS:Glioma_HighGrade	GBM			0.17007			-2.5558	-2.5558			0.514285	1.31568	1.31568	WT	WT	WT	WT	WT	WT	chr17_7577120-7577120_C>T	other non-conserving	p.R273H	WT	WT	WT	WT	WT	WT	WT	WT	WT	WT
ACH-001368	OACM51_OESOPHAGUS	OACM51_OESOPHAGUS	1503363	SIDM00444	esophagus	nan	nan	nan	nan	nan	nan	nan	nan	nan	nan	nan	nan	ESCA			0.0617481			-4.01746	-4.01746			-0.743279	-0.248198	-0.248198	WT	WT	WT	WT	WT	WT	chr17_7577538-7577538_C>T,chr17_7579523-7579523_G>-	other non-conserving,damaging	nan,p.T55fs	WT	WT	WT	WT	WT	WT	chr7_140482830-140482830_C>T	silent	p.R435R	WT
ACH-001569	MM415_SKIN			nan	skin																										WT	WT	WT	WT	WT	WT	chr17_7573986-7573986_G>A,chr17_7573987-7573987_G>A	silent,other non-conserving	p.A347A,p.A347V	WT	WT	WT	WT	WT	WT	WT	WT	WT	WT
ACH-001295	Y79_AUTONOMIC_GANGLIA			nan	eye																										WT	WT	WT	WT	WT	WT	WT	WT	WT	WT	WT	WT	WT	WT	WT	WT	WT	WT	WT
ACH-001364	NCIH345_LUNG	NCIH345_LUNG	688021	SIDM00719	lung	nan	nan	nan	nan	nan	nan	nan	nan	nan	nan	nan	nan	SCLC			0.0587202			-4.09	-4.09			-0.805688	-0.325809	-0.325809	WT	WT	WT	WT	WT	WT	chr17_7577574-7577574_T>C	other non-conserving	p.Y236C	WT	WT	WT	WT	WT	WT	WT	WT	WT	WT
ACH-000220	MINO_HAEMATOPOIETIC_AND_LYMPHOID_TISSUE			nan	lymphocyte	64.0	male	107.69763259999999	lymphoid_neoplasm	Caucasian	GNF	nan	nan	nan	~ 72 hrs	nan	Lymphoma:NH_B_cell	DLBC		0.0279651			-5.16023				0.130769				WT	WT	WT	WT	WT	WT	chr17_7578490-7578490_A>C	other non-conserving	p.V147G	WT	WT	WT	WT	WT	WT	WT	WT	WT	WT
ACH-000147	T47D_BREAST	T47D_BREAST	905945	SIDM00097	breast	54.0	female	89.96583328	carcinoma	Caucasian	ATCC	Adherent epithelial	RPMI-1640 + 10% FBS	5%DMSO	nan	188.6	Breast:Carcinoma	BRCA	1.30981		0.130292	0.389363		-2.94018	-4.32755	-1.22239		0.183577	-0.579968	-0.901177	WT	WT	WT	WT	WT	WT	chr17_7578269-7578269_G>A	other non-conserving	p.L194F	WT	WT	WT	WT	WT	WT	WT	WT	WT	WT
ACH-000636	RPMI8402_HAEMATOPOIETIC_AND_LYMPHOID_TISSUE	RPMI8402_HAEMATOPOIETIC_AND_LYMPHOID_TISSUE	909702	SIDM00403	blood	16.0	female	146.5725381	lymphoid_neoplasm	Caucasian	DSMZ	SUSPENSION	RPMI-1640+ 10% FBS	5% DMSO	nan	51.7	Leukemia:ALL	ALL		0.0500397	0.152588		-4.32078	-2.71229	-2.71229		1.85883	0.379649	1.14825	1.14825	chrX_76890138-76890138_G>C	other non-conserving	p.P1586A	WT	WT	WT	chr17_7577121-7577121_G>A	other non-conserving	p.R273C	WT	WT	WT	WT	WT	WT	WT	WT	WT	WT
ACH-000294	NB4_HAEMATOPOIETIC_AND_LYMPHOID_TISSUE	NB4_HAEMATOPOIETIC_AND_LYMPHOID_TISSUE	1323913	SIDM00428	blood	23.0	female	110.9067632	haematopoietic_neoplasm	Caucasian	DSMZ	single cells in suspention, round or polymorphic cells, very few are giant cells	90% rPMI 1640 + 10% h. i. FBS	nan	~ 35-45 hrs	nan	Leukemia:AML	LAML		0.0257585	0.0605817		-5.27881	-4.04497	-4.04497		-0.113337	-0.76695	-0.277635	-0.277635	WT	WT	WT	WT	WT	WT	chr17_7577538-7577538_C>T	other non-conserving	nan	WT	WT	WT	WT	WT	WT	WT	WT	WT	WT
ACH-000885	TOV21G_OVARY	TOV21G_OVARY	1240222	SIDM01169	ovary	62.0	female	241.64615980000002	carcinoma	Caucasian	nan	Adherent	MCDB 105 1:1 Media 199 +10%FBS	5%DMSO	nan	44.1	Ovary:Carcinoma	OV		0.0229797	0.0808861		-5.4435	-3.62796	-3.62796		-0.452364	-0.408169	0.168537	0.168537	WT	WT	WT	WT	WT	WT	WT	WT	WT	WT	WT	WT	WT	WT	WT	WT	WT	WT	WT
ACH-000251	NCIH2887_LUNG			nan	lung	nan	nan	nan	nan	nan	nan	nan	nan	nan	nan	nan	nan	nan													WT	WT	WT	WT	WT	WT	chr17_7578550-7578550_G>A	other non-conserving	p.S127F	WT	WT	WT	WT	WT	WT	WT	WT	WT	WT
ACH-001461	C99_LARGE_INTESTINE			nan	colorectal																										WT	WT	WT	WT	WT	WT	WT	WT	WT	WT	WT	WT	WT	WT	WT	WT	WT	WT	WT
ACH-001558	MERO48A_PLEURA			nan	lung																										WT	WT	WT	WT	WT	WT	WT	WT	WT	WT	WT	WT	WT	WT	WT	WT	WT	WT	WT
ACH-002254	KARPAS1106P_HAEMATOPOIETIC_AND_LYMPHOID_TISSUE	KARPAS1106P_HAEMATOPOIETIC_AND_LYMPHOID_TISSUE	1327773	SIDM01011	lymphoma	nan	nan	nan	nan	nan	nan	nan	nan	nan	nan	nan	nan	DLBC			0.20064			-2.31732	-2.31732			0.719466	1.57084	1.57084	WT	WT	WT	chr6_33287898-33287900_TCC>-	other non-conserving	p.451_452EE>E	WT	WT	WT	WT	WT	WT	WT	WT	WT	WT	WT	WT	WT
ACH-000900	NCIH23_LUNG	NCIH23_LUNG	905942	SIDM00138	lung	51.0	male	261.733481	carcinoma	African_american	ATCC	adherent	RPMI 1640 + 10% FBS	5% DMSO	nan	58.6	Lung:NSCLC_Adeno	LUAD	2.34937		0.147571	1.23227		-2.76052	-4.14789	-0.345849		0.338151	-0.387743	-0.366796	WT	WT	WT	WT	WT	WT	chr17_7577543-7577543_C>G	other non-conserving	p.M246I	WT	WT	WT	WT	WT	WT	WT	WT	WT	WT
ACH-000640	SKMEL31_SKIN	SKMEL31_SKIN	909727	SIDM01104	skin	nan	female	133.3183855	malignant_melanoma	Caucasian	ATCC	adherent	EMEM+10%FBS	5% DMSO	nan	nan	Skin:Melanoma	SKCM		0.0254305	0.0694885		-5.2973	-3.84708	-3.84708		-0.151397	-0.59669	-0.0659038	-0.0659038	WT	WT	WT	WT	WT	WT	WT	WT	WT	WT	WT	WT	WT	WT	WT	chr7_140453136-140453136_A>T	other non-conserving	p.V600E	WT
ACH-000115	VCAP_PROSTATE	VCAP_PROSTATE	1299075	SIDM01077	prostate	59.0	male	84.97649095	carcinoma	Caucasian	ATCC	Adherent	DMEM + 10% FBS	5%DMSO	nan	nan	Prostate:Carcinoma	PRAD			0.215187			-2.21634	-3.6037			0.806347	0.194495	0.194495	WT	WT	WT	WT	WT	WT	chr17_7577539-7577539_G>A	other non-conserving	p.R248W	WT	WT	WT	WT	WT	WT	WT	WT	WT	WT
ACH-001765	RH4_SOFT_TISSUE			nan	soft_tissue																										chrX_76872123-76872124_->GAGAGAATG	other non-conserving	p.1841_1842SI>SHSLI	WT	WT	WT	chr17_7578464-7578476_GGGTGCCGGGCGG>-	damaging	p.PPGTR152fs	WT	WT	WT	WT	WT	WT	WT	WT	WT	WT
ACH-000805	COLO679_SKIN	COLO679_SKIN	906818	SIDM00284	skin	47.0	female	191.64189419999997	malignant_melanoma	Caucasian	DSMZ	Adherent fibroblastic but not limited to monolayer.	RPMI-1640+10% FBS	10%DMSO	nan	69.3	Skin:Melanoma	SKCM			0.136011			-2.8782	-4.26557			0.236898	-0.513659	-0.513659	WT	WT	WT	WT	WT	WT	WT	WT	WT	WT	WT	WT	WT	WT	WT	chr7_140453136-140453136_A>T	other non-conserving	p.V600E	WT
ACH-000020	MHHCALL2_HAEMATOPOIETIC_AND_LYMPHOID_TISSUE	MHHCALL2_HAEMATOPOIETIC_AND_LYMPHOID_TISSUE	908132	SIDM00331	blood	15.0	female	58.29266472	lymphoid_neoplasm	Caucasian	DSMZ	single, relatively small round cells growing in suspention	80% RPMI 1640 +20% h. i. FBS	nan	~ 100 hrs	nan	Leukemia:ALL	ALL		0.0422206	0.110342		-4.56591	-3.17995	-3.17995		1.35422	-0.0227095	0.647887	0.647887	WT	WT	WT	WT	WT	WT	WT	WT	WT	WT	WT	WT	WT	WT	WT	WT	WT	WT	WT
ACH-002040	HMVII_SKIN	HMVII_SKIN		SIDM00291	skin	nan	nan	nan	nan	nan	nan	nan	nan	nan	nan	nan	nan	SKCM			0.525914			-0.927101	-2.31447			1.91556	1.57389	1.57389	WT	WT	WT	WT	WT	WT	chr17_7577135-7577135_T>A	other non-conserving	p.N268I	WT	WT	WT	WT	WT	WT	chr7_140481402-140481402_C>A	other non-conserving	p.G469V	WT
ACH-001452	BONNA12_HAEMATOPOIETIC_AND_LYMPHOID_TISSUE	BONNA12_HAEMATOPOIETIC_AND_LYMPHOID_TISSUE	906695	SIDM00984	blood	nan	nan	nan	nan	nan	nan	nan	nan	nan	nan	nan	nan	nan			0.101818			-3.29594	-3.29594			-0.122503	0.523786	0.523786	WT	WT	WT	WT	WT	WT	WT	WT	WT	WT	WT	WT	WT	WT	WT	WT	WT	WT	WT
ACH-000172	TM87_SOFT_TISSUE			nan	soft_tissue	nan	nan	nan	nan	nan	nan	nan	nan	nan	nan	nan	nan	nan													WT	WT	WT	WT	WT	WT	WT	WT	WT	WT	WT	WT	WT	WT	WT	WT	WT	WT	WT
ACH-000992	BICR18_UPPER_AERODIGESTIVE_TRACT			nan	upper_aerodigestive	nan	male	212.3890798	carcinoma	Caucasian	ECACC	nan	nan	nan	nan	nan	Upper_Aerodigestive_Tract:Carcinoma	HNSC		0.0515779			-4.2771				1.94875				chrX_76763845-76763845_T>G,chrX_76763872-76763873_->CTG,chrX_76763895-76763895_T>G,chrX_76763924-76763924_G>A,chrX_76764100-76764100_C>T,chrX_76764105-76764105_T>C,chrX_76776275-76776275_T>C,chrX_76776290-76776290_A>G,chrX_76776971-76776971_G>A,chrX_76777750-76777750_T>C,chrX_76777765-76777765_T>G,chrX_76777808-76777808_T>G,chrX_76777814-76777814_C>G,chrX_76778748-76778748_C>T,chrX_76778859-76778…	other non-conserving,other non-conserving,silent,other non-conserving,other non-conserving,silent,silent,silent,silent,silent,silent,other non-conserving,other non-conserving,silent,silent,silent,silent,silent,silent,other non-conserving,silent,silent,silent,silent,other non-conserving,silent,silent,silent,silent,damaging,other non-conserving,silent,silent,silent,other non-conserving,silent,silen…	p.Q2488P,p.2479_2479M>TV,p.P2471P,p.P2462S,p.S2403N,p.L2401L,p.K2397K,p.N2392N,p.L2327L,p.Q2322Q,p.S2317S,p.N2303T,p.S2301T,p.E2277E,p.L2240L,p.E2239E,p.R2178R,p.T2106T,p.P2068P,p.D2066E,p.E2031E,p.A1912A,p.D1905D,p.Q1848Q,p.S1841A,p.A1812A,p.H1805H,p.V1797V,p.G1787G,p.E1757E,p.R1739Q,p.S1732S,p.E1655E,p.V1653V,p.K1580E,p.I1558I,p.N1555N,p.E1524E,p.S1472S,p.1463_1464EE>E,p.S1418S,p.E1411E,p.G1290…	chr6_33288538-33288538_G>A	silent	p.C338C	chr17_7578437-7578437_G>T,chr17_7578462-7578462_G>A,chr17_7578466-7578466_G>C,chr17_7578468-7578468_G>C,chr17_7579311-7579311_C>T	other non-conserving,silent,other non-conserving,silent,damaging	p.Q165K,p.R156R,p.T155S,p.G154G,nan	WT	WT	WT	chr2_209101890-209101890_C>T,chr2_209103803-209103803_A>G,chr2_209103937-209103937_T>G,chr2_209103940-209103940_T>A	silent,silent,silent,other non-conserving	p.V386V,p.G382G,p.R338R,p.T337S	chr7_140434475-140434475_C>T,chr7_140434505-140434505_G>A,chr7_140434559-140434559_A>G,chr7_140439633-140439633_A>G,chr7_140439717-140439717_C>T,chr7_140449090-140449090_G>A,chr7_140449207-140449207_G>T,chr7_140453087-140453087_G>A,chr7_140453126-140453126_T>C,chr7_140453153-140453153_A>G,chr7_140453168-140453168_T>C,chr7_140476735-140476735_T>A,chr7_140476780-140476780_A>G,chr7_140477838-1404778…	silent,silent,silent,silent,silent,silent,silent,silent,silent,silent,silent,silent,silent,silent,silent,silent,silent,silent,silent,silent,silent,silent,silent,silent,silent,silent,silent,silent,silent,damaging,damaging,silent,silent	p.E741E,p.P731P,p.S713S,p.D702D,p.L674L,p.D663D,p.V624V,p.S616S,p.R603R,p.D594D,p.T589T,p.A557A,p.H542H,p.P490P,p.T470T,p.G466G,p.G421G,p.L410L,p.P334P,p.V281V,p.E275E,p.R260R,p.C251C,p.T241T,p.R239R,p.E193E,p.L190L,p.P170P,p.Q153Q,p.A145fs,p.V144fs,p.K51K,p.V47V	WT
ACH-000763	MM1S_HAEMATOPOIETIC_AND_LYMPHOID_TISSUE	MM1S_HAEMATOPOIETIC_AND_LYMPHOID_TISSUE	1659818	SIDM01265	plasma_cell	nan	nan	176.9697115	lymphoid_neoplasm	African_american	ACDC LAB	Mixed	RPMI-1640+ 10% FBS	nan	nan	35.9	Lymphoma:Multiple_Myeloma	MM	2.28769	0.0199987	0.0618087	1.19389	-5.64395	-4.01605	-4.01605	-0.385761	-0.865008	-0.742062	-0.246684	-0.316222	WT	WT	WT	WT	WT	WT	WT	WT	WT	WT	WT	WT	WT	WT	WT	WT	WT	WT	WT
ACH-001322	CME1_SOFT_TISSUE			nan	soft_tissue																										WT	WT	WT	WT	WT	WT	WT	WT	WT	WT	WT	WT	WT	WT	WT	WT	WT	WT	chr17_8131557-8131557_G>A
ACH-000509	HUT78_HAEMATOPOIETIC_AND_LYMPHOID_TISSUE			SIDM00851	lymphocyte	53.0	male	118.21756859999999	lymphoid_neoplasm	Caucasian	NIBRI	nan	nan	nan	nan	nan	Lymphoma:NH_T_cell	nan													WT	WT	WT	WT	WT	WT	chr17_7578263-7578263_G>A	damaging	p.R196*	WT	WT	WT	WT	WT	WT	WT	WT	WT	WT
ACH-000722	SNUC1_LARGE_INTESTINE	SNUC1_LARGE_INTESTINE	910905	SIDM01197	colorectal	71.0	male	201.5597753	carcinoma	Asian	NIBRI	nan	nan	nan	nan	nan	Colorectal:Carcinoma	COAD/READ			0.113608			-3.13786	-4.52523			0.0134968	-0.791476	-0.791476	WT	WT	WT	WT	WT	WT	chr17_7578433-7578433_G>T	damaging	p.S166*	WT	WT	WT	WT	WT	WT	WT	WT	WT	WT
ACH-000558	A172_CENTRAL_NERVOUS_SYSTEM	A172_CENTRAL_NERVOUS_SYSTEM	687563	SIDM00799	central_nervous_system	53.0	male	135.6190716	glioma	Caucasian	ATCC	Adherent	DMEM +10%FBS	5%DMSO	nan	67.5	CNS:Glioma_HighGrade	GBM			0.0836206			-3.58	-4.96736			-0.3669	-1.26453	-1.26453	WT	WT	WT	WT	WT	WT	WT	WT	WT	WT	WT	WT	WT	WT	WT	WT	WT	WT	WT
ACH-000886	NCIH2009_LUNG	NCIH2009_LUNG	724873	SIDM00756	lung	68.0	female	295.7446546	carcinoma	Caucasian	ATCC	nan	DMEM:HAM's F12 1:1 +5% FBS	5%DMSO	nan	53.7	Lung:NSCLC_Adeno	LUAD			0.0775921			-3.68795	-5.07531			-0.459776	-1.38003	-1.38003	WT	WT	WT	WT	WT	WT	chr17_7577120-7577120_C>A	other non-conserving	p.R273L	WT	WT	WT	WT	WT	WT	WT	WT	WT	WT
ACH-000768	MDAMB231_BREAST	MDAMB231_BREAST	905960	SIDM00146	breast	51.0	female	166.1463911	carcinoma	Caucasian	ATCC	Adherent	RPMI-1640 + 10% FBS	5%DMSO	nan	67.9	Breast:Carcinoma	BRCA	2.73287		0.143705	1.45042		-2.79882	-4.18618	-0.119		0.3052	-0.42872	-0.27386	WT	WT	WT	WT	WT	WT	chr17_7577099-7577099_C>T	other non-conserving	p.R280K	WT	WT	WT	WT	WT	WT	chr7_140481417-140481417_C>A	other non-conserving	p.G464V	WT
ACH-000315	KARPAS422_HAEMATOPOIETIC_AND_LYMPHOID_TISSUE	KARPAS422_HAEMATOPOIETIC_AND_LYMPHOID_TISSUE	907274	SIDM01008	lymphocyte	73.0	female	108.0711108	lymphoid_neoplasm	Caucasian	DSMZ	supension	RPMI-1640 + 20% FBS	10%DMSO	nan	58.5	Lymphoma:NH_B_cell	DLBC			0.228861			-2.12746	-2.12746			0.882817	1.77398	1.77398	chrX_76949407-76949407_T>C	silent	p.P130P	WT	WT	WT	chr17_7576891-7576891_T>A	damaging	p.K319*	WT	WT	WT	WT	WT	WT	WT	WT	WT	WT
ACH-000406	U937_HAEMATOPOIETIC_AND_LYMPHOID_TISSUE			SIDM01195	blood	37.0	male	125.2330331	lymphoid_neoplasm	Caucasian	NIBRI	nan	RPMI-1640 + 10% FBS	5%DMSO	nan	115.9	Lymphoma:NH_B_cell	DLBC		0.0274495			-5.18708				0.0754977				WT	WT	WT	WT	WT	WT	chr17_7578370-7578370_C>T	damaging	nan	WT	WT	WT	WT	WT	WT	WT	WT	WT	WT
ACH-002183	OVMIU_OVARY	OVMIU_OVARY	1240200	SIDM00465	ovary	nan	nan	nan	nan	nan	nan	nan	nan	nan	nan	nan	nan	OV			0.118683			-3.07481	-4.46218			0.0677419	-0.724018	-0.724018	WT	WT	WT	WT	WT	WT	WT	WT	WT	WT	WT	WT	WT	WT	WT	WT	WT	WT	WT
ACH-001685	UHO1_HAEMATOPOIETIC_AND_LYMPHOID_TISSUE			nan	lymphocyte																										WT	WT	WT	WT	WT	WT	WT	WT	WT	WT	WT	WT	WT	WT	WT	WT	WT	WT	WT
ACH-000991	SNU81_LARGE_INTESTINE	SNU81_LARGE_INTESTINE	1660036	SIDM00193	colorectal	53.0	male	1759.696678	carcinoma	Asian	KCLB	epithelial; monolayer	RPMI 1640 with L-glutamine (300mg/L), 90%; heat inactivated fetal bovine serum (FBS),10%	nan	30 hrs	nan	Colorectal:Carcinoma	COAD/READ			0.0793335			-3.65593	-3.65593			-0.432226	0.13862	0.13862	chrX_76938462-76938462_C>A,chrX_76938837-76938837_C>T	other non-conserving,silent	p.K762N,p.E637E	WT	WT	WT	chr17_7578212-7578212_G>A,chr17_7578535-7578535_T>G	damaging,other non-conserving	p.R213*,p.K132T	WT	WT	WT	WT	WT	WT	WT	WT	WT	WT
ACH-000913	ESS1_ENDOMETRIUM	ESS1_ENDOMETRIUM	907000	SIDM01043	uterus	76.0	female	369.37269710000004	carcinoma	Caucasian	nan	nan	nan	5% DMSO	120hrs??	49.1	Endometrium:Others	UCEC	1.52137	0.0285872	0.0547705	0.605368	-5.12849	-4.19046	-4.19046	-0.997765	0.196104	-0.892119	-0.433292	-0.715528	WT	WT	WT	chr6_33287521-33287521_G>A	other non-conserving	p.R526C	chr17_7578212-7578212_G>A	damaging	p.R213*	WT	WT	WT	WT	WT	WT	WT	WT	WT	WT
ACH-002233	DIFI_LARGE_INTESTINE	DIFI_LARGE_INTESTINE	1789883	SIDM00049	colorectal	nan	nan	nan	nan	nan	nan	nan	nan	nan	nan	nan	nan	COAD/READ			0.0493647			-4.34038	-4.34038			-1.0211	-0.593696	-0.593696	WT	WT	WT	WT	WT	WT	chr17_7578535-7578535_T>C	other non-conserving	p.K132R	WT	WT	WT	WT	WT	WT	WT	WT	WT	WT
ACH-001127	MOLT4_HAEMATOPOIETIC_AND_LYMPHOID_TISSUE	MOLT4_HAEMATOPOIETIC_AND_LYMPHOID_TISSUE	905958	SIDM00145	blood	19.0	male	nan	lymphoid_neoplasm	Caucasian	nan	nan	nan	nan	nan	nan	nan	ALL			0.15711			-2.67015	-2.67015			0.415899	1.19333	1.19333	WT	WT	WT	WT	WT	WT	chr17_7577022-7577022_G>A	damaging	p.R306*	WT	WT	WT	WT	WT	WT	WT	WT	WT	chr17_8132764-8132764_G>A,chr17_8139594-8139594_G>A
ACH-001379	PACADD161_PANCREAS			nan	pancreas																										WT	WT	WT	WT	WT	WT	chr17_7577022-7577022_G>A	damaging	p.R306*	WT	WT	WT	WT	WT	WT	WT	WT	WT	WT
ACH-002306	STS0421_SOFT_TISSUE	STS0421_SOFT_TISSUE	1299061	SIDM00041	gastric	nan	nan	nan	nan	nan	nan	nan	nan	nan	nan	nan	nan	STAD			0.0603882			-4.04959	-4.04959			-0.770921	-0.282573	-0.282573	WT	WT	WT	WT	WT	WT	WT	WT	WT	WT	WT	WT	WT	WT	WT	WT	WT	WT	WT
ACH-002237	ETK1_BILIARY_TRACT	ETK1_BILIARY_TRACT	906861	SIDM00276	bile_duct	nan	nan	nan	nan	nan	nan	nan	nan	nan	nan	nan	nan	nan			0.103779			-3.26841	-3.26841			-0.0988239	0.553232	0.553232	WT	WT	WT	WT	WT	WT	chr17_7578406-7578406_C>T	other non-conserving	p.R175H	WT	WT	WT	WT	WT	WT	WT	WT	WT	WT
ACH-000253	COLO201_LARGE_INTESTINE			SIDM00823	colorectal	70.0	male	94.61007254	carcinoma	Caucasian	nan	Suspension with some loosely attached cells	RPMI-1640+10% FBS	5%DMSO	nan	nan	Colorectal:Carcinoma	COAD/READ	1.36662	0.0153625		0.450608	-6.02444			-1.1587	-1.64829			-1.1587	WT	WT	WT	WT	WT	WT	WT	WT	WT	WT	WT	WT	WT	WT	WT	chr7_140453136-140453136_A>T	other non-conserving	p.V600E	WT
ACH-000221	SNU398_LIVER	SNU398_LIVER	1240217	SIDM01181	liver	42.0	male	127.2397008	carcinoma	Asian	NIBRI	nan	nan	nan	nan	nan	Liver:HCC	LIHC			0.111257			-3.16803	-4.5554			-0.012459	-0.823754	-0.823754	WT	WT	WT	WT	WT	WT	chr17_7578177-7578177_C>T	damaging	p.E224E	WT	WT	WT	WT	WT	WT	WT	WT	WT	WT
ACH-000044	MDAMB134VI_BREAST			SIDM00005	breast	47.0	female	56.69106407	carcinoma	Caucasian	nan	Mixed line	L15+20%FBS	5%DMSO	nan	368.0	Breast:Carcinoma	BRCA	2.64474			1.40313				-0.16818				-0.16818	WT	WT	WT	WT	WT	WT	WT	WT	WT	WT	WT	WT	WT	WT	WT	WT	WT	WT	WT
ACH-000386	KG1_HAEMATOPOIETIC_AND_LYMPHOID_TISSUE	KG1_HAEMATOPOIETIC_AND_LYMPHOID_TISSUE	907278	SIDM00785	blood	59.0	male	128.4480014	haematopoietic_neoplasm	African_american	ATCC	suspension	IMDM+20%FBS	5% DMSO	nan	78.5	Leukemia:AML	LAML			0.0442378			-4.49858	-4.49858			-1.15721	-0.762959	-0.762959	WT	WT	WT	WT	WT	WT	chr17_7578176-7578176_C>T	damaging	nan	WT	WT	WT	WT	WT	WT	WT	WT	WT	WT
ACH-002249	JHU011_UPPER_AERODIGESTIVE_TRACT	JHU011_UPPER_AERODIGESTIVE_TRACT	1240161	SIDM00128	upper_aerodigestive	nan	nan	nan	nan	nan	nan	nan	nan	nan	nan	nan	nan	HNSC			0.0579456			-4.10916	-4.10916			-0.822171	-0.346307	-0.346307	WT	WT	WT	WT	WT	WT	chr17_7578175-7578175_A>T	damaging	nan	WT	WT	WT	WT	WT	WT	WT	WT	WT	WT
ACH-000046	ACHN_KIDNEY	ACHN_KIDNEY	905950	SIDM00123	kidney	22.0	male	68.18873896	carcinoma	Caucasian	ATCC	Adherent	EMEM +10%FBS	5% DMSO	nan	284.1	Kidney:Carcinoma	KIRC	1.66392		0.0451261	0.734582		-4.46989	-4.46989	-0.863395		-1.13254	-0.732271	-0.797833	WT	WT	WT	WT	WT	WT	WT	WT	WT	WT	WT	WT	WT	WT	WT	WT	WT	WT	WT
ACH-000375	G402_SOFT_TISSUE	G402_SOFT_TISSUE	907298	SIDM00855	soft_tissue	0.75	female	97.12610232	rhabdoid_tumour	Caucasian	nan	nan	nan	5% DMSO	nan	42.1	Soft_Tissue:Sarcoma_Rhabdoid	SARC	2.68131		0.0609494	1.42294		-4.03624	-4.03624	-0.147576		-0.759439	-0.268295	-0.207936	WT	WT	WT	WT	WT	WT	WT	WT	WT	WT	WT	WT	WT	WT	WT	WT	WT	WT	WT
ACH-000493	SNU423_LIVER	SNU423_LIVER	909737	SIDM01199	liver	40.0	male	141.3075379	carcinoma	Asian	NIBRI	nan	nan	nan	nan	nan	Liver:HCC	LIHC	2.06106		0.175967	1.04339		-2.50662	-3.89399	-0.54227		0.556595	-0.116092	-0.329181	WT	WT	WT	WT	WT	WT	chr17_7578556-7578556_T>C	damaging	nan	WT	WT	WT	WT	WT	WT	WT	WT	WT	WT
ACH-001842	ICC2_BILIARY_TRACT			nan	bile_duct																										WT	WT	WT	WT	WT	WT	WT	WT	WT	WT	WT	WT	WT	WT	WT	WT	WT	WT	WT
ACH-002118	EW3_BONE	EW3_BONE	949161	SIDM00202	bone	nan	nan	nan	nan	nan	nan	nan	nan	nan	nan	nan	nan	nan			0.219247			-2.18937	-3.57674			0.829548	0.223347	0.223347	WT	WT	WT	WT	WT	WT	chr17_7579312-7579312_C>T	damaging	p.T125T	WT	WT	WT	WT	WT	WT	WT	WT	WT	WT
ACH-000754	L428_HAEMATOPOIETIC_AND_LYMPHOID_TISSUE	L428_HAEMATOPOIETIC_AND_LYMPHOID_TISSUE	907322	SIDM00327	lymphocyte	37.0	female	157.59784199999999	lymphoid_neoplasm	Caucasian	DSMZ	Supsension	RPMI 1640 +10%FBS	5% DMSO	nan	nan	Lymphoma:Hodgkin	nan			0.0712121			-3.81173	-3.81173			-0.566278	-0.0280837	-0.0280837	WT	WT	WT	WT	WT	WT	WT	WT	WT	WT	WT	WT	WT	WT	WT	WT	WT	WT	WT
ACH-000851	MORCPR_LUNG			nan	lung	nan	nan	232.80530389999998	carcinoma	Caucasian	ECACC	aggregates in suspension	RPMI-1640+ 10%FBS	5%DMSO	nan	nan	Lung:NSCLC_Adeno	LUAD		0.0260204			-5.26421				-0.0832903				chrX_76939005-76939005_T>A	other non-conserving	p.K581N	WT	WT	WT	chr17_7578475-7578475_G>-	damaging	p.P153fs	WT	WT	WT	WT	WT	WT	WT	WT	WT	WT
ACH-002342	BB30PBL_MATCHED_NORMAL_TISSUE	BB30PBL_Matched_Normal_Tissue		nan	non_cancerous																0.112485			-3.1522	-3.1522			0.00116621	0.677578	0.677578	WT	WT	WT	WT	WT	WT	WT	WT	WT	WT	WT	WT	WT	WT	WT	WT	WT	WT	WT
ACH-001628	PEA1_OVARY			nan	ovary																										WT	WT	WT	WT	WT	WT	WT	WT	WT	WT	WT	WT	WT	WT	WT	WT	WT	WT	WT
ACH-000599	PATU8902_PANCREAS	PATU8902_PANCREAS	1298526	SIDM00455	pancreas	44.0	female	140.2362937	carcinoma	Caucasian	DSMZ	Epithelial Adherent cells in monolayer	DMEM + 10%FBS	10%DMSO	nan	57.6	Pancreas:Carcinoma	PAAD		0.0322098	0.0798082		-4.95636	-3.64732	-3.64732		0.550451	-0.424821	0.147829	0.147829	WT	WT	WT	WT	WT	WT	chr17_7578404-7578404_A>T	other non-conserving	p.C176S	WT	WT	WT	WT	WT	WT	WT	WT	WT	WT
ACH-000381	T84_LARGE_INTESTINE	T84_LARGE_INTESTINE	909761	SIDM00782	colorectal	72.0	male	101.51633340000001	carcinoma	Caucasian	NIBRI	nan	nan	nan	nan	nan	Colorectal:Carcinoma	COAD/READ	1.35001		0.0516	0.432965		-4.27649	-4.27649	-1.17705		-0.966134	-0.525336	-0.851191	WT	WT	WT	WT	WT	WT	chr17_7578290-7578290_C>A	damaging	nan	WT	WT	WT	WT	WT	WT	WT	WT	WT	WT
ACH-001599	NCIH64_LUNG	NCIH64_LUNG	688026	SIDM01126	lung	nan	nan	nan	nan	nan	nan	nan	nan	nan	nan	nan	nan	SCLC			0.151796			-2.71979	-4.10716			0.373189	-0.34417	-0.34417	WT	WT	WT	WT	WT	WT	chr17_7577090-7577090_C>G	other non-conserving	p.R283P	WT	WT	WT	WT	WT	WT	WT	WT	WT	WT
ACH-000804	NB1_AUTONOMIC_GANGLIA	NB1_AUTONOMIC_GANGLIA	949179	SIDM00578	peripheral_nervous_system	2.0	male	209.27445649999999	neuroblastoma	Asian	nan	Adherent	nan	5% DMSO	nan	37.5	PNET:Neuroblastoma	NB		0.0331089	0.0436971		-4.91664	-4.51632	-4.51632		0.632215	-1.17248	-0.781942	-0.781942	WT	WT	WT	WT	WT	WT	WT	WT	WT	WT	WT	WT	WT	WT	WT	chr7_140500166-140500166_T>C	other non-conserving	p.I326V	WT
ACH-001750	TTC442_SOFT_TISSUE			nan	soft_tissue																										WT	WT	WT	WT	WT	WT	WT	WT	WT	WT	WT	WT	WT	WT	WT	WT	WT	WT	WT
ACH-000940	AN3CA_ENDOMETRIUM	AN3CA_ENDOMETRIUM	910781	SIDM00901	uterus	55.0	female	485.28645750000004	carcinoma	Caucasian	ATCC	Adherent epithelial	EMEM + 10% FBS	5% DMSO	nan	88.9	Endometrium:Carcinoma	UCEC	2.41941		0.0487785	1.27465		-4.35761	-4.35761	-0.301779		-1.03593	-0.612135	-0.456957	chrX_76939673-76939674_->T	damaging	p.L359fs	chr6_33287167-33287167_A>G	silent	p.L644L	chr17_7572944-7572944_C>A,chr17_7578211-7578211_C>T,chr17_7579420-7579420_G>-	other non-conserving,other non-conserving,damaging	p.G389W,p.R213Q,p.P89fs	WT	WT	WT	WT	WT	WT	WT	WT	WT	chr17_8132750-8132750_T>C
ACH-000491	NCIH716_LARGE_INTESTINE	NCIH716_LARGE_INTESTINE	908458	SIDM00779	colorectal	33.0	male	118.5641877	carcinoma	Caucasian	NIBRI	nan	nan	nan	nan	nan	Colorectal:Carcinoma	COAD/READ			0.129678			-2.94699	-4.33436			0.177714	-0.587259	-0.587259	WT	WT	WT	WT	WT	WT	chr17_7578177-7578177_C>A	damaging	p.E224D	WT	WT	WT	WT	WT	WT	WT	WT	WT	WT
ACH-001328	A431_SKIN	A431_SKIN	910925	SIDM00995	skin	nan	nan	nan	nan	nan	nan	nan	nan	nan	nan	nan	nan	nan			0.0953396			-3.39078	-4.77815			-0.204104	-1.06208	-1.06208	WT	WT	WT	WT	WT	WT	chr17_7577120-7577120_C>T	other non-conserving	p.R273H	WT	WT	WT	WT	WT	WT	WT	WT	WT	WT
ACH-000641	CMK_HAEMATOPOIETIC_AND_LYMPHOID_TISSUE	CMK_HAEMATOPOIETIC_AND_LYMPHOID_TISSUE	910566	SIDM00959	blood	0.8333	male	179.7006765	haematopoietic_neoplasm	Asian	DSMZ	single, multiformed, large cells growing in suspension, sometimes loosely adherent (<3%); 2-3% giant, multinucleated cells	80% RPMI 1640 + 20% h.i. FBS	10%DMSO	~ 40-50 hrs	37.6	Leukemia:AML	LAML		0.0351831	0.102479		-4.82897	-3.2866	-3.2866		0.812678	-0.114471	0.533774	0.533774	WT	WT	WT	WT	WT	WT	chr17_7579542-7579542_C>G	other non-conserving	p.D49H	WT	WT	WT	WT	WT	WT	WT	WT	WT	WT
ACH-000344	SNU668_STOMACH			nan	gastric	63.0	male	133.8217124	carcinoma	Asian	KCLB	epithelial; monolayer	RPMI 1640 with L-glutamine (300mg/L), 90%; heat inactivated fetal bovine serum (FBS),10%	nan	nan	nan	Gastric:Carcinoma	STAD		0.0126734			-6.30205				-2.21976				WT	WT	WT	WT	WT	WT	chr17_7578205-7578205_C>T	other non-conserving	p.S215N	WT	WT	WT	WT	WT	WT	WT	WT	WT	WT
ACH-000370	SNU626_CENTRAL_NERVOUS_SYSTEM			nan	central_nervous_system	65.0	male	138.2523835	glioma	Asian	KCLB	spendle; monolayer	RPMI 1640 with L-glutamine (300mg/L), 90%; heat inactivated fetal bovine serum (FBS),10%	nan	92 hrs	nan	CNS:Glioma_HighGrade	GBM		0.024784			-5.33445				-0.227876				WT	WT	WT	WT	WT	WT	chr17_7577568-7577568_C>G,chr17_7579313-7579313_G>A,chr17_7579321-7579322_CA>-	other non-conserving,damaging,damaging	p.C238S,p.T125M,p.V122fs	WT	WT	WT	WT	WT	WT	WT	WT	WT	WT
ACH-000127	SLR20_KIDNEY			nan	kidney	nan	nan	121.23841850000001	carcinoma	Caucasian	nan	nan	nan	nan	nan	nan	nan	KIRC													WT	WT	WT	chr6_33288304-33288304_G>A	silent	p.A368A	chr17_7578552-7578552_G>C	damaging	p.Y126*	WT	WT	WT	WT	WT	WT	WT	WT	WT	WT
ACH-002202	TMK1_STOMACH	TMK1_STOMACH	1299069	SIDM00040	gastric	nan	nan	nan	nan	nan	nan	nan	nan	nan	nan	nan	nan	STAD			0.0606633			-4.04303	-4.04303			-0.765279	-0.275557	-0.275557	WT	WT	WT	WT	WT	WT	chr17_7578413-7578413_C>T	other non-conserving	p.V173M	WT	WT	WT	WT	WT	WT	WT	WT	WT	WT
ACH-000336	OCIAML3_HAEMATOPOIETIC_AND_LYMPHOID_TISSUE	OCIAML3_HAEMATOPOIETIC_AND_LYMPHOID_TISSUE	1290455	SIDM00462	blood	57.0	male	96.19953871	haematopoietic_neoplasm	Caucasian	DSMZ	single, mostly round cells growing in suspention	80% alpha-MEM + 20% h. i. FBS	nan	~ 35-40 hrs	70.4	Leukemia:AML	LAML			0.0579555			-4.10891	-4.10891			-0.821959	-0.346043	-0.346043	WT	WT	WT	WT	WT	WT	WT	WT	WT	WT	WT	WT	WT	WT	WT	WT	WT	WT	WT
ACH-002128	NCIH2722_PLEURA	NCIH2722_PLEURA	1290812	SIDM00099	lung	nan	nan	nan	nan	nan	nan	nan	nan	nan	nan	nan	nan	MESO			0.0938273			-3.41385	-4.80121			-0.223951	-1.08676	-1.08676	WT	WT	WT	WT	WT	WT	WT	WT	WT	WT	WT	WT	WT	WT	WT	WT	WT	WT	WT
ACH-002138	H513_LUNG	NCIH513_PLEURA	1240141	nan	lung																0.82214			-0.282544	-1.66991			2.47012	2.26352	2.26352
ACH-000564	KHM1B_HAEMATOPOIETIC_AND_LYMPHOID_TISSUE			nan	plasma_cell	53.0	male	142.2057449	lymphoid_neoplasm	Asian	HSSRB	SUSPENSION, LYMPHOCYTE-LIKE	RPMI-1640+10% FBS	5%DMSO	nan	112.8	Lymphoma:Multiple_Myeloma	MM		0.0197732			-5.66031				-0.898691				WT	WT	WT	WT	WT	WT	WT	WT	WT	WT	WT	WT	WT	WT	WT	WT	WT	WT	WT
ACH-001365	NCIH847_LUNG	NCIH847_LUNG	1240193	SIDM01149	lung	nan	nan	nan	nan	nan	nan	nan	nan	nan	nan	nan	nan	SCLC			0.060651			-4.04332	-4.04332			-0.765531	-0.27587	-0.27587	WT	WT	WT	WT	WT	WT	chr17_7578457-7578457_C>A	other non-conserving	p.R158L	WT	WT	WT	WT	WT	WT	WT	WT	WT	WT
ACH-000732	PECAPJ41CLONED2_UPPER_AERODIGESTIVE_TRACT			nan	upper_aerodigestive	67.0	female	164.2044753	carcinoma	Caucasian	ECACC	nan	nan	nan	nan	nan	Upper_Aerodigestive_Tract:Carcinoma	HNSC		0.0256562			-5.28455				-0.125152				WT	WT	WT	WT	WT	WT	chr17_7576928-7576928_T>A	damaging	nan	WT	WT	WT	WT	WT	WT	WT	WT	WT	WT
ACH-000915	IPC298_SKIN	IPC298_SKIN	907171	SIDM01059	skin	64.0	female	317.892098	malignant_melanoma	Caucasian	DSMZ	Adherent	RPMI 1640+10%FBS	5% DMSO	30 hrs	29.0	Skin:Melanoma	SKCM			0.132457			-2.9164	-2.9164			0.204033	0.929859	0.929859	WT	WT	WT	chr6_33289545-33289545_G>A	other non-conserving	p.S53L	chr17_7578212-7578212_G>A	damaging	p.R213*	WT	WT	WT	WT	WT	WT	WT	WT	WT	WT
ACH-002020	SKGIIIA_CERVIX	SKGIIIA_CERVIX		SIDM00381	cervix	nan	nan	nan	nan	nan	nan	nan	nan	nan	nan	nan	nan	CESC			0.260089			-1.94292	-3.33029			1.04158	0.48703	0.48703	chrX_76938724-76938724_G>A	other non-conserving	p.S675F	WT	WT	WT	chr17_7577120-7577120_C>T,chr17_7578413-7578413_C>G,chr17_7578534-7578534_C>G	other non-conserving,other non-conserving,other non-conserving	p.R273H,p.V173L,p.K132N	WT	WT	WT	WT	WT	WT	WT	WT	WT	WT
ACH-002377	HCC38_MATCHED_NORMAL_TISSUE	HCC38_Matched_Normal_Tissue		SIDM00674	non_cancerous																0.365884			-1.45054	-1.45054			1.46521	2.49823	2.49823	WT	WT	WT	WT	WT	WT	WT	WT	WT	WT	WT	WT	WT	WT	WT	WT	WT	WT	WT
ACH-001192	SKNEP1_BONE	SKNEP1_BONE		SIDM00027	bone	nan	nan	nan	nan	nan	nan	nan	nan	nan	nan	nan	nan	KIRC			0.063016			-3.98814	-3.98814			-0.71805	-0.216824	-0.216824	WT	WT	WT	WT	WT	WT	chr17_7577548-7577548_C>T	other non-conserving	nan	WT	WT	WT	WT	WT	WT	WT	WT	WT	WT
ACH-002092	CHSA0011_BONE	CHSA0011_BONE	1290767	SIDM00051	bone	nan	nan	nan	nan	nan	nan	nan	nan	nan	nan	nan	nan	nan			0.0636064			-3.97468	-3.97468			-0.706475	-0.20243	-0.20243	WT	WT	WT	WT	WT	WT	WT	WT	WT	WT	WT	WT	WT	WT	WT	WT	WT	WT	WT
ACH-001616	OCILY18_HAEMATOPOIETIC_AND_LYMPHOID_TISSUE			nan	lymphocyte																										WT	WT	WT	WT	WT	WT	WT	WT	WT	WT	WT	WT	WT	WT	WT	WT	WT	WT	WT
ACH-000633	FU97_STOMACH	FU97_STOMACH	1290806	SIDM00503	gastric	66.0	female	194.2359967	carcinoma	Asian	HSRRB	ADHRENT EPITHELIAL; was clumpy	DMEM + 10% FBS	5% DMSO	95 hrs	48.5	Gastric:Carcinoma	STAD	10.764		0.451964	3.42814		-1.14572	-2.53309	1.93762		1.72747	1.33998	1.6388	WT	WT	WT	WT	WT	WT	chr17_7578191-7578191_A>C	other non-conserving	p.Y220D	WT	WT	WT	WT	WT	WT	WT	WT	WT	WT
ACH-001578	NCCIT_TESTIS	NCCIT_TESTIS	908441	SIDM00655	embryo	nan	nan	nan	nan	nan	nan	nan	nan	nan	nan	nan	nan	nan			0.0782063			-3.67657	-5.06394			-0.449989	-1.36786	-1.36786	WT	WT	WT	WT	WT	WT	chr17_7577124-7577124_C>-	damaging	p.V272fs	WT	WT	WT	WT	WT	WT	WT	WT	WT	WT
ACH-002029	SAS_UPPER_AERODIGESTIVE_TRACT	SAS_UPPER_AERODIGESTIVE_TRACT		SIDM00351	upper_aerodigestive	nan	nan	nan	nan	nan	nan	nan	nan	nan	nan	nan	nan	HNSC			0.0401601			-4.63809	-4.63809			-1.27725	-0.912233	-0.912233	WT	WT	WT	WT	WT	WT	chr17_7574021-7574021_C>A	damaging	p.E336*	WT	WT	WT	WT	WT	WT	WT	WT	WT	WT
ACH-000524	KURAMOCHI_OVARY	KURAMOCHI_OVARY	909975	SIDM00554	ovary	nan	female	130.3578322	carcinoma	Asian	GNF	nan	nan	nan	nan	nan	Ovary:Carcinoma	UNABLE TO CLASSIFY			0.02873			-5.1213	-5.1213			-1.69298	-1.42923	-1.42923	WT	WT	WT	WT	WT	WT	chr17_7577097-7577097_C>A	other non-conserving	p.D281Y	WT	WT	WT	WT	WT	WT	WT	WT	WT	WT
ACH-000717	COLO680N_OESOPHAGUS	COLO680N_OESOPHAGUS	906817	SIDM00956	esophagus	57.0	female	150.9132136	carcinoma	African_american	DSMZ	Adherent, epitheloid cells growing in monolayers	90% RPMI 1640 + 10% h.i.FBS	nan	~ 60-70 hrs	nan	Oesophagus:Carcinoma	ESCA			0.0867352			-3.52724	-4.9146			-0.321508	-1.20808	-1.20808	WT	WT	WT	WT	WT	WT	chr17_7577539-7577539_G>A	other non-conserving	p.R248W	WT	WT	WT	WT	WT	WT	WT	WT	WT	WT
ACH-000801	HS936T_SKIN			nan	skin	nan	male	172.24541530000002	malignant_melanoma	Caucasian	GNF	nan	nan	nan	nan	nan	Skin:Melanoma	SKCM		0.0668066			-3.90387				2.71709				chrX_76907782-76907784_TCC>-	other non-conserving	p.1459_1460EE>E	WT	WT	WT	WT	WT	WT	WT	WT	WT	WT	WT	WT	chr7_140453192-140453192_A>T	damaging	p.N581K	WT
ACH-000241	JK1_HAEMATOPOIETIC_AND_LYMPHOID_TISSUE			nan	blood	62.0	male	122.76220179999999	haematopoietic_neoplasm	Asian	DSMZ	round single cells growing in suspention (cell pellet shows dedish color hemoglobin)	80% RPMI 1640 +20% h.i.FBS	nan	~ 50 hrs	nan	Leukemia:CML	LCML		0.0288366			-5.11596				0.221902				WT	WT	WT	chr6_33287822-33287822_A>C	other non-conserving	p.D477E	WT	WT	WT	WT	WT	WT	WT	WT	WT	WT	WT	WT	WT
ACH-000974	SNGM_ENDOMETRIUM	SNGM_ENDOMETRIUM	909735	SIDM00373	uterus	52.0	female	788.4232097999999	carcinoma	Asian	HSSRB	epithelial-like	Ham's F12 medium with 20% fetal bovine serum	nan	nan	nan	Endometrium:Carcinoma	UCEC	2.90403	0.0258556	0.0816308	1.53806	-5.27338	-3.61474	-3.61474	-0.0278668	-0.102163	-0.396794	0.182684	0.0774084	chrX_76890149-76890150_->T,chrX_76939673-76939674_->T	damaging,damaging	p.T1582fs,p.L359fs	WT	WT	WT	WT	WT	WT	chr3_10183774-10183774_G>A	silent	p.P81P	WT	WT	WT	WT	WT	WT	WT
ACH-001394	SUM229PE_BREAST			nan	breast																										WT	WT	WT	WT	WT	WT	chr17_7577121-7577121_G>A	other non-conserving	p.R273C	WT	WT	WT	WT	WT	WT	WT	WT	WT	WT
ACH-001804	LPS510_SOFT_TISSUE			nan	soft_tissue																										WT	WT	WT	WT	WT	WT	chr17_7578550-7578550_G>C	other non-conserving	p.S127C	WT	WT	WT	WT	WT	WT	WT	WT	WT	WT
ACH-000580	C32_SKIN	C32_SKIN	906830	SIDM00890	skin	53.0	male	125.507998	malignant_melanoma	Caucasian	ATCC	ADHERENT	EMEM+10%FBS	5% DMSO	nan	59.0	Skin:Melanoma	SKCM			0.163882			-2.60927	-3.99664			0.46828	-0.225917	-0.225917	WT	WT	WT	WT	WT	WT	WT	WT	WT	WT	WT	WT	chr2_209116293-209116293_T>A	damaging	nan	chr7_140453136-140453136_A>T	other non-conserving	p.V600E	WT
ACH-002044	HSQ89_UPPER_AERODIGESTIVE_TRACT			nan	upper_aerodigestive																										WT	WT	WT	WT	WT	WT	chr17_7577141-7577141_C>T	other non-conserving	p.G266E	WT	WT	WT	WT	WT	WT	WT	WT	WT	WT
ACH-000395	NCIH520_LUNG	NCIH520_LUNG	908443	SIDM01130	lung	nan	male	102.7445013	carcinoma	Caucasian	ATCC	ADHERENT EPITHELIAL;	RPMI-1640+10% FBS	5%DMSO	nan	47.3	Lung:NSCLC_Squamous	LUSC	5.72527		0.3518	2.51734		-1.50717	-2.89454	0.990489		1.41649	0.953253	0.971871	WT	WT	WT	WT	WT	WT	chr17_7578492-7578492_C>T	damaging	p.W146*	WT	WT	WT	WT	WT	WT	WT	WT	WT	WT
ACH-001624	ONDA9_CENTRAL_NERVOUS_SYSTEM			nan	central_nervous_system																										WT	WT	WT	WT	WT	WT	WT	WT	WT	WT	WT	WT	WT	WT	WT	WT	WT	WT	WT
ACH-001698	UPCISCC116_UPPER_AERODIGESTIVE_TRACT			nan	upper_aerodigestive																										chrX_76919013-76919013_T>C	silent	p.S1326S	WT	WT	WT	chr17_7578406-7578406_C>T	other non-conserving	p.R175H	WT	WT	WT	WT	WT	WT	WT	WT	WT	WT
ACH-001408	UMUC14_URINARY_TRACT			nan	urinary_tract																										WT	WT	WT	WT	WT	WT	chr17_7577099-7577099_C>G	other non-conserving	p.R280T	WT	WT	WT	WT	WT	WT	WT	WT	WT	WT
ACH-000904	NCIH2106_LUNG			nan	lung	58.0	male	259.7926564	carcinoma	Caucasian	GNF	nan	nan	nan	nan	nan	Lung:NSCLC_Others	nan													WT	WT	WT	chr6_33289169-33289169_T>C	other non-conserving	p.N128S	chr17_7577539-7577540_GG>AA,chr17_7577540-7577540_G>A	other non-conserving,silent	p.R248W,p.N247N	WT	WT	WT	WT	WT	WT	WT	WT	WT	WT
ACH-000810	SKMEL30_SKIN	SKMEL30_SKIN	909726	SIDM00392	skin	67.0	male	180.5771581	malignant_melanoma	Caucasian	DSMZ	Adherent	RPMI-1640 + 10% FBS	10%DMSO	nan	41.6	Skin:Melanoma	SKCM	2.28969		0.150267	1.19515		-2.7344	-4.12177	-0.384453		0.360623	-0.359797	-0.372125	WT	WT	WT	WT	WT	WT	chr17_7577086-7577087_TG>-,chr17_7577120-7577120_C>T	damaging,other non-conserving	p.T284fs,p.R273H	WT	WT	WT	WT	WT	WT	chr7_140501213-140501213_C>G,chr7_140501249-140501249_C>T	damaging,other non-conserving	p.D287H,p.E275K	chr17_8132131-8132131_G>A
ACH-000530	DMS114_LUNG	DMS114_LUNG	687983	SIDM00865	lung	68.0	male	140.1947167	carcinoma	Caucasian	ATCC	Adherent	Waymouth MB 7521 medium+10%FBS	5%DMSO	nan	77.7	Lung:SCLC	SCLC	9.08181		0.184743	3.18298		-2.43641	-2.43641	1.68268		0.617005	1.44342	1.56305	WT	WT	WT	WT	WT	WT	chr17_7578212-7578212_G>A	damaging	p.R213*	WT	WT	WT	WT	WT	WT	WT	WT	WT	WT
ACH-001183	RT11284_URINARY_TRACT			SIDM01202	urinary_tract	nan	female	nan	carcinoma	Caucasian	nan	nan	nan	nan	nan	nan	nan	BLCA													WT	WT	WT	WT	WT	WT	chr17_7577538-7577538_C>T,chr17_7578382-7578382_G>C	other non-conserving,damaging	nan,p.S183*	WT	WT	WT	WT	WT	WT	WT	WT	WT	WT
ACH-000187	CORL311_LUNG	CORL311_LUNG	687980	SIDM00509	lung	63.0	male	100.2513257	carcinoma	Caucasian	ECACC	Large irregular aggregates, difficult to count	RPMI+10%FBS	?	nan	112.1	Lung:SCLC	SCLC	6.51005	0.0378563	0.160688	2.70267	-4.72332	-2.63767	-2.63767	1.18321	1.03017	0.44385	1.22809	1.20565	WT	WT	WT	WT	WT	WT	chr17_7576927-7576927_C>T	damaging	nan	WT	WT	WT	WT	WT	WT	WT	WT	WT	WT
ACH-001521	HKA1_SKIN			nan	skin																										WT	WT	WT	WT	WT	WT	chr17_7578370-7578370_C>G	damaging	nan	WT	WT	WT	WT	WT	WT	WT	WT	WT	WT
ACH-001047	CORL51_LUNG			nan	lung	71.0	male	nan	carcinoma	Caucasian	nan	nan	nan	nan	nan	nan	nan	SCLC													WT	WT	WT	WT	WT	WT	chr17_7577526-7577526_A>G,chr17_7578529-7578529_A>C	other non-conserving,other non-conserving	p.L252P,p.F134C	WT	WT	WT	WT	WT	WT	WT	WT	WT	WT
ACH-000899	WM88_SKIN			nan	skin	nan	nan	258.8512253	malignant_melanoma	Caucasian	GNF	nan	nan	nan	nan	nan	Skin:Melanoma	SKCM		0.0480813			-4.37838				1.74026				WT	WT	WT	WT	WT	WT	WT	WT	WT	WT	WT	WT	WT	WT	WT	chr7_140453136-140453136_A>T	other non-conserving	p.V600E	chr17_8132102-8132102_G>A,chr17_8140750-8140750_G>A
ACH-000505	RKN_SOFT_TISSUE	RKN_SOFT_TISSUE	1298539	SIDM00353	soft_tissue	45.0	female	165.9472722	leiomyosarcoma	Asian	HSSRB	epithelial-like	Han's F12 medium 90% with 10% fetal bovine serum	nan	nan	nan	Soft_Tissue:Sarcoma_Leiomyo	SARC	2.56595	0.0320713	0.0662007	1.35949	-4.96257	-3.91701	-3.91701	-0.213554	0.537652	-0.656854	-0.140722	-0.177138	WT	WT	WT	WT	WT	WT	chr17_7578406-7578406_C>T	other non-conserving	p.R175H	WT	WT	WT	WT	WT	WT	WT	WT	WT	WT
ACH-002090	BB65RCC_KIDNEY	BB65RCC_KIDNEY	753533	SIDM00191	kidney	nan	nan	nan	nan	nan	nan	nan	nan	nan	nan	nan	nan	KIRC			0.0434948			-4.52301	-4.52301			-1.17824	-0.789105	-0.789105	WT	WT	WT	WT	WT	WT	chr17_7577539-7577539_G>A	other non-conserving	p.R248W	chr3_10191580-10191580_C>-	damaging	p.H191fs	WT	WT	WT	WT	WT	WT	WT
ACH-000829	HUNS1_HAEMATOPOIETIC_AND_LYMPHOID_TISSUE			nan	plasma_cell	nan	male	187.9138764	lymphoid_neoplasm	Caucasian	NIBRI	nan	nan	nan	nan	nan	Lymphoma:Multiple_Myeloma	MM													chrX_76937377-76937377_G>A	other non-conserving	p.S1124F	WT	WT	WT	WT	WT	WT	WT	WT	WT	WT	WT	WT	WT	WT	WT	WT
ACH-000040	U118MG_CENTRAL_NERVOUS_SYSTEM	U118MG_CENTRAL_NERVOUS_SYSTEM	687588	SIDM01193	central_nervous_system	nan	nan	73.11071221	glioma	Caucasian	nan	Adherent	DMEM+10% FBS	5% DMSO	nan	49.9	CNS:Glioma	GBM			0.127216			-2.97465	-4.36201			0.153922	-0.616847	-0.616847	WT	WT	WT	WT	WT	WT	chr17_7578211-7578211_C>T	other non-conserving	p.R213Q	WT	WT	WT	WT	WT	WT	WT	WT	WT	WT
ACH-001955	JHC7_BONE			nan	bone																										WT	WT	WT	WT	WT	WT	chr17_7578211-7578211_C>A	other non-conserving	p.R213L	WT	WT	WT	WT	WT	WT	WT	WT	WT	WT
ACH-002182	OVCA433_OVARY	OVCA433_OVARY	1480367	SIDM00966	ovary	nan	nan	nan	nan	nan	nan	nan	nan	nan	nan	nan	nan	OV			0.0528812			-4.2411	-4.2411			-0.935691	-0.487478	-0.487478	WT	WT	WT	chr6_33287910-33287915_TCCTCT>-	other non-conserving	p.446_448EEE>E	WT	WT	WT	WT	WT	WT	WT	WT	WT	WT	WT	WT	WT
ACH-000646	OVMANA_OVARY			nan	ovary	51.0	female	173.23309419999998	carcinoma	Asian	NIBRI	nan	nan	nan	nan	nan	Ovary:Carcinoma	OV		0.026552			-5.23504				-0.0232339				WT	WT	WT	WT	WT	WT	WT	WT	WT	WT	WT	WT	WT	WT	WT	WT	WT	WT	WT
ACH-000567	ST486_HAEMATOPOIETIC_AND_LYMPHOID_TISSUE	ST486_HAEMATOPOIETIC_AND_LYMPHOID_TISSUE	910906	SIDM01198	lymphocyte	nan	female	91.43886081	lymphoid_neoplasm	Caucasian	NIBRI	nan	nan	nan	nan	nan	Lymphoma:NH_B_cell	DLBC			0.211316			-2.24253	-3.62989			0.783815	0.166475	0.166475	WT	WT	WT	WT	WT	WT	chr17_7577566-7577566_T>C,chr17_7578457-7578457_C>T	other non-conserving,other non-conserving	p.N239D,p.R158H	WT	WT	WT	WT	WT	WT	WT	WT	WT	WT
ACH-000317	TUHR14TKB_KIDNEY			nan	kidney	nan	nan	125.66482240000002	carcinoma	Asian	RIKEN	ADHERENT; EPITHELIAL-LIKE	RPMI-1640+10%FBS	5%DMSO	nan	160.3	Kidney:Carcinoma	KIRC		0.0250757			-5.31756				-0.193122				WT	WT	WT	WT	WT	WT	WT	WT	WT	chr3_10188315-10188315_T>C	other non-conserving	p.L153P	WT	WT	WT	WT	WT	WT	WT
ACH-001100	KHYG_HAEMATOPOIETIC_AND_LYMPHOID_TISSUE			nan	lymphocyte																										WT	WT	WT	WT	WT	WT	chr17_7577539-7577539_G>A	other non-conserving	p.R248W	WT	WT	WT	WT	WT	WT	WT	WT	WT	WT
ACH-000167	KE97_STOMACH			nan	plasma_cell	52.0	male	117.10434939999999	lymphoid_neoplasm	Asian	RIKEN	Adherent	RPMI 1640 +10%FBS	5% DMSO	nan	40.3	Lymphoma:Multiple_Myeloma	MM													WT	WT	WT	WT	WT	WT	WT	WT	WT	WT	WT	WT	WT	WT	WT	WT	WT	WT	WT
ACH-000832	CAL27_UPPER_AERODIGESTIVE_TRACT	CAL27_UPPER_AERODIGESTIVE_TRACT	910916	SIDM00937	upper_aerodigestive	56.0	male	186.1487595	carcinoma	Caucasian	NIBRI	nan	nan	nan	nan	29.3	Upper_Aerodigestive_Tract:Carcinoma	HNSC	1.74512		0.0380286	0.803323		-4.71677	-4.71677	-0.791912		-1.34494	-0.996413	-0.894163	chrX_76939219-76939219_G>A	other non-conserving	p.S510F	WT	WT	WT	chr17_7578271-7578271_T>A	other non-conserving	p.H193L	WT	WT	WT	WT	WT	WT	WT	WT	WT	WT
ACH-002210	ARH77_HAEMATOPOIETIC_AND_LYMPHOID_TISSUE	ARH77_HAEMATOPOIETIC_AND_LYMPHOID_TISSUE	906765	SIDM00900	non_cancerous	nan	nan	nan	nan	nan	nan	nan	nan	nan	nan	nan	nan	MM			0.11863			-3.07546	-3.07546			0.0671875	0.759681	0.759681	WT	WT	WT	WT	WT	WT	chr17_7577120-7577120_C>T	other non-conserving	p.R273H	WT	WT	WT	WT	WT	WT	WT	WT	WT	WT
ACH-000542	HEYA8_OVARY			SIDM01215	ovary	nan	female	111.0355795	carcinoma	Caucasian	NIBRI	nan	nan	nan	nan	nan	Ovary:Carcinoma	OV		0.0230376			-5.43987				-0.444894				WT	WT	WT	WT	WT	WT	WT	WT	WT	WT	WT	WT	WT	WT	WT	chr7_140481417-140481417_C>T	other non-conserving	p.G464E	WT
ACH-000581	SNU16_STOMACH	SNU16_STOMACH	908446	SIDM01145	gastric	33.0	female	154.3977156	carcinoma	Asian	NIBRI	nan	nan	nan	nan	nan	Gastric:Carcinoma	STAD	2.14404		0.428137	1.10033		-1.22386	-2.61122	-0.483053		1.66024	1.25638	0.386665	WT	WT	WT	WT	WT	WT	chr17_7578235-7578235_T>A,chr17_7578371-7578371_C>G	other non-conserving,damaging	p.Y205F,p.G187R	WT	WT	WT	WT	WT	WT	chr7_140624404-140624415_CGGCGCCGGCGC>-	other non-conserving	p.GAGA30del	WT
ACH-000622	KNS42_CENTRAL_NERVOUS_SYSTEM	KNS42_CENTRAL_NERVOUS_SYSTEM	907282	SIDM00607	central_nervous_system	16.0	male	168.9199906	glioma	Asian	HSSRB	Adherent	EMEM + 5% FBS	5% DMSO	nan	79.7	CNS:Glioma	LGG			0.10972			-3.1881	-4.57547			-0.0297262	-0.845227	-0.845227	WT	WT	WT	WT	WT	WT	chr17_7574003-7574003_G>A	damaging	p.R342*	WT	WT	WT	WT	WT	WT	WT	WT	WT	WT
ACH-002298	PCI6A_UPPER_AERODIGESTIVE_TRACT	PCI6A_UPPER_AERODIGESTIVE_TRACT	1240206	SIDM00115	upper_aerodigestive	nan	nan	nan	nan	nan	nan	nan	nan	nan	nan	nan	nan	HNSC			0.0686884			-3.86379	-3.86379			-0.611065	-0.08378	-0.08378	WT	WT	WT	WT	WT	WT	chr17_7573010-7573010_T>A,chr17_7578406-7578406_C>T	damaging,other non-conserving	nan,p.R175H	WT	WT	WT	WT	WT	WT	WT	WT	WT	WT
ACH-000630	YD8_UPPER_AERODIGESTIVE_TRACT			nan	upper_aerodigestive	46.0	female	176.58332380000002	carcinoma	Asian	KCLB	epithelial; monolayer	RPMI 1640 with L-glutamine (300mg/L), 90%; heat inactivated fetal bovine serum (FBS),10%	nan	29.3 hrs	nan	Upper_Aerodigestive_Tract:Carcinoma	HNSC		0.0194546			-5.68375				-0.946937				chrX_76920242-76920242_C>A	damaging	p.E1279*	WT	WT	WT	chr17_7577120-7577120_C>T	other non-conserving	p.R273H	WT	WT	WT	WT	WT	WT	WT	WT	WT	WT
ACH-000691	HCC2157_BREAST	HCC2157_BREAST	749715	SIDM00774	breast	48.0	female	173.1865428	carcinoma	African_american	NIBRI	nan	nan	nan	nan	nan	nan	BRCA	3.12075		0.22407	1.64189		-2.15798	-3.54534	0.0801127		0.856557	0.256935	0.168524	WT	WT	WT	WT	WT	WT	chr17_7577539-7577539_G>A	other non-conserving	p.R248W	WT	WT	WT	WT	WT	WT	WT	WT	WT	WT
ACH-002277	NBTU110_AUTONOMIC_GANGLIA	NBTU110_AUTONOMIC_GANGLIA	1240181	SIDM00579	peripheral_nervous_system	nan	nan	nan	nan	nan	nan	nan	nan	nan	nan	nan	nan	NB			0.0495618			-4.33463	-4.33463			-1.01616	-0.587545	-0.587545	chrX_76939256-76939256_T>C	other non-conserving	p.R498G	WT	WT	WT	chr17_7579350-7579350_A>G	other non-conserving	p.F113L	WT	WT	WT	WT	WT	WT	WT	WT	WT	WT
ACH-002380	COLO829_MATCHED_NORMAL_TISSUE	COLO829_Matched_Normal_Tissue		SIDM00908	non_cancerous																0.105592			-3.24343	-3.24343			-0.0773268	0.579966	0.579966	WT	WT	WT	WT	WT	WT	WT	WT	WT	WT	WT	WT	WT	WT	WT	WT	WT	WT	WT
ACH-002262	KY821_HAEMATOPOIETIC_AND_LYMPHOID_TISSUE	KY821_HAEMATOPOIETIC_AND_LYMPHOID_TISSUE	907300	SIDM00553	leukemia	nan	nan	nan	nan	nan	nan	nan	nan	nan	nan	nan	nan	LAML			0.0576847			-4.11567	-4.11567			-0.827772	-0.353272	-0.353272	WT	WT	WT	WT	WT	WT	chr17_7578406-7578406_C>T	other non-conserving	p.R175H	WT	WT	WT	WT	WT	WT	WT	WT	WT	WT
ACH-002394	GEO_LARGE_INTESTINE			SIDM00068	colorectal	nan	nan	nan	nan	nan	nan	nan	nan	nan	nan	nan	nan	COAD/READ													WT	WT	WT	chr6_33287989-33287989_T>C	other non-conserving	p.M422V	WT	WT	WT	WT	WT	WT	WT	WT	WT	WT	WT	WT	WT
ACH-000706	EKVX_LUNG	EKVX_LUNG	905970	SIDM00119	lung	nan	nan	169.36546859999999	carcinoma	Caucasian	Garraway Lab	Adherent	RPMI-1640+ 5% FBS	5% DMSO	nan	68.4	Lung:NSCLC_Others	LUAD			0.211038			-2.24443	-3.63179			0.782181	0.164442	0.164442	WT	WT	WT	WT	WT	WT	chr17_7578239-7578239_C>A,chr17_7578240-7578240_C>A	damaging,silent	p.E204*,p.V203V	chr3_10183863-10183863_G>T,chr3_10183864-10183864_C>T	other non-conserving,silent	p.S111I,p.S111S	WT	WT	WT	WT	WT	WT	WT
ACH-001066	EWS834_BONE			nan	bone																										WT	WT	WT	WT	WT	WT	chr17_7577535-7577535_C>A	other non-conserving	p.R249M	WT	WT	WT	WT	WT	WT	WT	WT	WT	WT
ACH-000390	LUDLU1_LUNG			nan	lung	72.0	male	108.90280420000002	carcinoma	Caucasian	ECAAC	epithelial, adherent	RPMI-1640+10% FBS	5% DMSO	nan	120.7	Lung:NSCLC_Squamous	LUSC		0.0146635			-6.09163				-1.78659				WT	WT	WT	WT	WT	WT	chr17_7577539-7577539_G>A	other non-conserving	p.R248W	WT	WT	WT	WT	WT	WT	WT	WT	WT	WT
ACH-000196	HCC1599_BREAST	HCC1599_BREAST	749713	SIDM00877	breast	44.0	female	78.58675429	carcinoma	Caucasian	ATCC	suspension, multicell aggregates	RPMI-1640+10% FBS	5%DMSO	nan	179.8	Breast:Carcinoma	BRCA	1.78195		0.120786	0.833455		-3.04947	-4.43684	-0.760578		0.0895435	-0.696906	-0.728742	WT	WT	WT	chr6_33289067-33289067_G>A	other non-conserving	p.T162I	chr17_7577610-7577610_T>A	damaging	nan	WT	WT	WT	WT	WT	WT	WT	WT	WT	WT
ACH-000910	MDAMB453_BREAST	MDAMB453_BREAST	908122	SIDM00272	breast	48.0	female	295.7364988	carcinoma	Caucasian	NIBRI	nan	nan	nan	nan	nan	Breast:Carcinoma	BRCA	8.28839		0.524021	3.05109		-0.932303	-2.31967	1.54553		1.91109	1.56832	1.55693	WT	WT	WT	WT	WT	WT	WT	WT	WT	chr3_10183798-10183798_C>G	silent	p.L89L	WT	WT	WT	WT	WT	WT	WT
ACH-002231	D566MG_CENTRAL_NERVOUS_SYSTEM	D566MG_CENTRAL_NERVOUS_SYSTEM	946377	SIDM00206	central_nervous_system	nan	nan	nan	nan	nan	nan	nan	nan	nan	nan	nan	nan	GBM			0.0881774			-3.50345	-3.50345			-0.301039	0.301762	0.301762	WT	WT	WT	WT	WT	WT	chr17_7577548-7577548_C>T	other non-conserving	nan	WT	WT	WT	WT	WT	WT	WT	WT	WT	WT
ACH-000184	HS343T_FIBROBLAST			nan	fibroblast	47.0	female	84.80855584	carcinoma	Caucasian	GNF	nan	nan	nan	nan	nan	nan	nan		0.0258735			-5.27238				-0.100106				WT	WT	WT	WT	WT	WT	WT	WT	WT	WT	WT	WT	WT	WT	WT	WT	WT	WT	WT
ACH-000895	CL34_LARGE_INTESTINE	CL34_LARGE_INTESTINE	1290771	SIDM00945	colorectal	nan	female	289.0129884	carcinoma	Caucasian	DSMZ	epithelial-like cells growing as monolayer; cells do not grow to complete confluency	DMEM:HAM's F12 1:1 +20% FBS	10%DMSO	~ 48 hrs	nan	Colorectal:Carcinoma	COAD/READ			0.0588323			-4.08725	-4.08725			-0.803321	-0.322865	-0.322865	chrX_76909629-76909629_G>A	damaging	p.R1426*	WT	WT	WT	chr17_7572963-7572963_T>-,chr17_7578551-7578551_A>G	damaging,other non-conserving	p.K382fs,p.S127P	WT	WT	WT	WT	WT	WT	chr7_140453136-140453136_A>T	other non-conserving	p.V600E	WT
ACH-000277	HCC1419_BREAST	HCC1419_BREAST	907045	SIDM00882	breast	42.0	female	95.68871956	carcinoma	Caucasian	GNF	nan	nan	nan	nan	nan	Breast:Carcinoma	BRCA	2.32349		0.0682929	1.2163		-3.87212	-3.87212	-0.362463		-0.618233	-0.0926935	-0.227578	WT	WT	WT	WT	WT	WT	chr17_7578190-7578190_T>C,chr17_7579461-7579467_CAGGGGC>-	other non-conserving,damaging	p.Y220C,p.APA74fs	WT	WT	WT	WT	WT	WT	WT	WT	WT	WT
ACH-002159	M14_SKIN	M14_SKIN	905975	SIDM00003	skin	nan	nan	nan	nan	nan	nan	nan	nan	nan	nan	nan	nan	SKCM			0.473819			-1.07759	-2.46496			1.78608	1.41288	1.41288	WT	WT	WT	WT	WT	WT	chr17_7577141-7577141_C>T	other non-conserving	p.G266E	WT	WT	WT	WT	WT	WT	chr7_140453136-140453136_A>T	other non-conserving	p.V600E	chr17_8133908-8133908_G>A
ACH-001123	MKL2_SKIN			nan	skin	nan	nan	nan	nan	nan	nan	nan	nan	nan	nan	nan	nan	nan
ACH-002142	HUO3N1_BONE	HUO3N1_BONE	909977	SIDM00584	bone	nan	nan	nan	nan	nan	nan	nan	nan	nan	nan	nan	nan	nan			0.455497			-1.13449	-2.52185			1.73713	1.352	1.352	WT	WT	WT	WT	WT	WT	chr17_7579461-7579462_->A	damaging	p.A76fs	WT	WT	WT	WT	WT	WT	WT	WT	WT	WT
ACH-001709	WSUNHL_HAEMATOPOIETIC_AND_LYMPHOID_TISSUE	WSUNHL_HAEMATOPOIETIC_AND_LYMPHOID_TISSUE	909785	SIDM00412	lymphocyte	nan	nan	nan	nan	nan	nan	nan	nan	nan	nan	nan	nan	nan			0.100642			-3.3127	-4.70006			-0.136923	-0.978535	-0.978535	chrX_76938285-76938285_T>A	other non-conserving	p.L821F	WT	WT	WT	chr17_7577538-7577538_C>T	other non-conserving	nan	WT	WT	WT	WT	WT	WT	WT	WT	WT	WT
ACH-000868	HCC1195_LUNG			nan	lung	47.0	male	254.5878645	carcinoma	African_american	KCLB	epithelial; monolayer	RPMI 1640 with L-glutamine (300mg/L), 90%; heat inactivated fetal bovine serum (FBS),10%	nan	nan	nan	Lung:NSCLC_Adeno	LUAD													WT	WT	WT	WT	WT	WT	chr17_7577150-7577159_TTACCACTAC>-	damaging	p.*W262fs	chr3_10191559-10191559_C>T	silent	p.L184L	WT	WT	WT	WT	WT	WT	WT
ACH-000807	SNU738_CENTRAL_NERVOUS_SYSTEM			nan	central_nervous_system	40.0	male	268.24917999999997	glioma	Asian	KCLB	spindle; monolayer	RPMI 1640 with L-glutamine (300mg/L), 90%; heat inactivated fetal bovine serum (FBS),10%	nan	56 hrs	nan	CNS:Glioma	nan		0.0843126			-3.56811				3.40827				WT	WT	WT	WT	WT	WT	chr17_7578275-7578275_G>A	damaging	p.Q192*	WT	WT	WT	WT	WT	WT	chr7_140624440-140624440_C>T	other non-conserving	p.D22N	WT
ACH-000419	KMS28BM_HAEMATOPOIETIC_AND_LYMPHOID_TISSUE			nan	plasma_cell	77.0	female	151.68024340000002	lymphoid_neoplasm	Asian	HSSRB	suspension	RPMI +10%FBS	5% DMSO	nan	60.0	Lymphoma:Multiple_Myeloma	MM													WT	WT	WT	WT	WT	WT	chr17_7579374-7579374_C>G	other non-conserving	p.G105R	WT	WT	WT	WT	WT	WT	WT	WT	WT	WT
ACH-000367	NCIH226_LUNG	NCIH226_LUNG	905941	SIDM00139	lung	nan	male	93.36313254	carcinoma	Caucasian	ATCC	nan	RPMI-1640+10% FBS	5%DMSO	nan	49.8	Lung:NSCLC_Squamous	LUSC	3.21843		0.067983	1.68636		-3.87868	-5.26605	0.126349		-0.623878	-1.5841	-0.728876	WT	WT	WT	WT	WT	WT	WT	WT	WT	WT	WT	WT	WT	WT	WT	WT	WT	WT	WT
ACH-000823	KYSE140_OESOPHAGUS	KYSE140_OESOPHAGUS	753573	SIDM01032	esophagus	54.0	male	203.6248043	carcinoma	Asian	DSMZ	Adherent monolayer	RPMI 1640+10%FBS	10%DMSO	nan	27.5	Oesophagus:Carcinoma	ESCA			0.0779943			-3.68049	-5.06785			-0.453358	-1.37205	-1.37205	WT	WT	WT	WT	WT	WT	chr17_7578271-7578271_T>C	other non-conserving	p.H193R	WT	WT	WT	WT	WT	WT	WT	WT	WT	WT
ACH-000382	CORL24_LUNG			nan	lung	71.0	male	116.9513426	carcinoma	Caucasian	ECACC	Aggregates in suspension	RPMI+10%FBS	?	nan	139.2	Lung:SCLC	SCLC	1.77555	0.0132095		0.828263	-6.24228			-0.765977	-2.09671			-0.765977	WT	WT	WT	WT	WT	WT	chr17_7577580-7577580_T>C	other non-conserving	p.Y234C	WT	WT	WT	WT	WT	WT	WT	WT	WT	WT
ACH-001539	KML1_HAEMATOPOIETIC_AND_LYMPHOID_TISSUE			nan	lymphocyte																										WT	WT	WT	WT	WT	WT	chr17_7577120-7577120_C>T	other non-conserving	p.R273H	WT	WT	WT	WT	WT	WT	WT	WT	WT	WT
ACH-000150	HCC2935_LUNG			nan	lung	39.0	male	84.68601916	carcinoma	Caucasian	ATCC	Adherent epithelial	RPMI-1640 + 10% FBS	5%DMSO	nan	115.9	Lung:NSCLC_Others	nan		0.014739			-6.08422				-1.77133				WT	WT	WT	WT	WT	WT	chr17_7578190-7578190_T>C	other non-conserving	p.Y220C	WT	WT	WT	WT	WT	WT	WT	WT	WT	WT
ACH-002302	RPMI8866_HAEMATOPOIETIC_AND_LYMPHOID_TISSUE	RPMI8866_HAEMATOPOIETIC_AND_LYMPHOID_TISSUE	910544	SIDM00482	leukemia	nan	nan	nan	nan	nan	nan	nan	nan	nan	nan	nan	nan	LCML			0.0776181			-3.68746	-3.68746			-0.45936	0.104878	0.104878	WT	WT	WT	WT	WT	WT	WT	WT	WT	WT	WT	WT	WT	WT	WT	WT	WT	WT	WT
ACH-001430	TC138_BONE			nan	bone																										WT	WT	WT	WT	WT	WT	WT	WT	WT	WT	WT	WT	WT	WT	WT	WT	WT	WT	WT
ACH-000605	TE6_OESOPHAGUS	TE6_OESOPHAGUS	946355	SIDM00328	esophagus	nan	nan	151.56544240000002	carcinoma	Asian	RIKEN	epithelial-like	RPMI 1640 +10%FBS	nan	nan	nan	Oesophagus:Carcinoma	ESCA			0.104105			-3.26389	-4.65125			-0.0949309	-0.926315	-0.926315	chrX_76952184-76952184_G>A	other non-conserving	p.S84L	WT	WT	WT	chr17_7577538-7577538_C>T	other non-conserving	nan	WT	WT	WT	WT	WT	WT	WT	WT	WT	WT
ACH-000404	K029AX_SKIN			nan	skin	nan	nan	95.97901737	malignant_melanoma	Caucasian	Acd Lab	nan	RPMI-1640+10% FBS	5% DMSO	nan	57.0	Skin:Melanoma	SKCM		0.0268774			-5.21746				0.0129422				WT	WT	WT	WT	WT	WT	WT	WT	WT	WT	WT	WT	WT	WT	WT	chr7_140453136-140453136_A>T	other non-conserving	p.V600E	WT
ACH-000351	MKN1_STOMACH	MKN1_STOMACH	908138	SIDM00271	gastric	72.0	male	148.07106299999998	carcinoma	Asian	HSSRB	epithelial-like	RPMI 1640 medium with 10% fetal calf serum.	nan	nan	nan	Gastric:Carcinoma	STAD	3.44974		0.195592	1.78649		-2.35408	-3.74145	0.230475		0.687837	0.0471186	0.138797	WT	WT	WT	WT	WT	WT	chr17_7578502-7578502_A>G	other non-conserving	p.V143A	WT	WT	WT	WT	WT	WT	WT	WT	WT	WT
ACH-002284	NB6_AUTONOMIC_GANGLIA	NB6_AUTONOMIC_GANGLIA	949173	SIDM00253	peripheral_nervous_system	nan	nan	nan	nan	nan	nan	nan	nan	nan	nan	nan	nan	NB			0.0505336			-4.30661	-4.30661			-0.992056	-0.557571	-0.557571	WT	WT	WT	WT	WT	WT	chr17_7577094-7577094_G>A	other non-conserving	nan	WT	WT	WT	WT	WT	WT	WT	WT	WT	chr17_8133961-8133961_T>C
ACH-001514	HCC1008_BREAST			nan	breast
ACH-002153	LB373MELD_SKIN	LB373MELD_SKIN	753581	SIDM00184	skin	nan	nan	nan	nan	nan	nan	nan	nan	nan	nan	nan	nan	SKCM			0.0550074			-4.18423	-4.18423			-0.886762	-0.42663	-0.42663	WT	WT	WT	WT	WT	WT	WT	WT	WT	WT	WT	WT	WT	WT	WT	WT	WT	WT	WT
ACH-000442	RERFLCSQ1_LUNG	RERFLCSQ1_LUNG	1298538	SIDM00354	lung	74.0	female	150.1872136	carcinoma	Asian	HSRRB	ADHERENT; 0.05% TRYPSIN	RPMI-1640 +10% FBS	5%DMSO	nan	nan	nan	LUSC			0.186225			-2.42488	-3.81225			0.626923	-0.0286333	-0.0286333	WT	WT	WT	WT	WT	WT	WT	WT	WT	WT	WT	WT	WT	WT	WT	WT	WT	WT	WT
ACH-000614	RVH421_SKIN	RVH421_SKIN	909706	SIDM00401	skin	28.0	male	nan	malignant_melanoma	Caucasian	nan	Adherent	RPMI1640+10%FBS	5%DMSO	nan	49.5	Skin:Melanoma	SKCM	3.909		0.234857	1.9668		-2.09015	-3.47751	0.417982		0.914918	0.329511	0.373747	WT	WT	WT	WT	WT	WT	chr17_7579533-7579533_G>-	damaging	p.Q52fs	WT	WT	WT	WT	WT	WT	chr7_140453136-140453136_A>T	other non-conserving	p.V600E	WT
ACH-000601	MIAPACA2_PANCREAS	MIAPACA2_PANCREAS	724870	SIDM00505	pancreas	65.0	male	139.6416545	carcinoma	Caucasian	NIBRI	nan	nan	nan	nan	nan	Pancreas:Carcinoma	PAAD	3.08275		0.231981	1.62422		-2.10792	-3.49529	0.0617302		0.899624	0.310492	0.186111	WT	WT	WT	WT	WT	WT	chr17_7577539-7577539_G>A	other non-conserving	p.R248W	WT	WT	WT	WT	WT	WT	WT	WT	WT	WT
ACH-000113	OCIAML2_HAEMATOPOIETIC_AND_LYMPHOID_TISSUE	OCIAML2_HAEMATOPOIETIC_AND_LYMPHOID_TISSUE	910947	SIDM00446	blood	65.0	male	102.9637208	haematopoietic_neoplasm	Caucasian	DSMZ	single, round to oval cells in suspention	80-90% RPMI 1640 +10-20% h. i. FBS	nan	~ 30-50 hrs	nan	Leukemia:AML	LAML			0.0628402			-3.99217	-3.99217			-0.721518	-0.221137	-0.221137	WT	WT	WT	WT	WT	WT	WT	WT	WT	WT	WT	WT	WT	WT	WT	WT	WT	WT	WT
ACH-002329	SKBR5_BREAST			nan	breast
ACH-002232	DG75_HAEMATOPOIETIC_AND_LYMPHOID_TISSUE	DG75_HAEMATOPOIETIC_AND_LYMPHOID_TISSUE	906838	SIDM00948	lymphoma	nan	nan	nan	nan	nan	nan	nan	nan	nan	nan	nan	nan	nan			0.150376			-2.73335	-2.73335			0.361523	1.12571	1.12571	chrX_76854919-76854919_T>C	other non-conserving	p.T1973A	WT	WT	WT	chr17_7577090-7577090_C>T,chr17_7577548-7577548_C>T	other non-conserving,other non-conserving	p.R283H,nan	WT	WT	WT	WT	WT	WT	WT	WT	WT	chr17_8141512-8141512_G>-
ACH-000096	G401_SOFT_TISSUE	G401_SOFT_TISSUE	907299	SIDM00856	kidney	0.25	male	90.26965062	rhabdoid_tumour	Caucasian	NIBRI	nan	nan	nan	nan	nan	Soft_Tissue:Sarcoma_Rhabdoid	SARC	5.64967		0.142715	2.49817		-2.80879	-2.80879	0.970548		0.29662	1.045	1.00777	WT	WT	WT	WT	WT	WT	chr17_7577108-7577108_C>A	other non-conserving	p.C277F	WT	WT	WT	WT	WT	WT	WT	WT	WT	WT
ACH-000090	PC3_PROSTATE	PC3_PROSTATE	905934	SIDM00088	prostate	62.0	male	80.19387358	carcinoma	Caucasian	ATCC	ADHERENT EPITHELIAL;	F-12 +10%FBS	5% DMSO	nan	42.3	Prostate:Carcinoma	PRAD	2.29139		0.114541	1.19623		-3.12606	-4.51343	-0.383335		0.0236488	-0.778851	-0.581093	WT	WT	WT	WT	WT	WT	chr17_7578516-7578516_G>-	damaging	p.A138fs	WT	WT	WT	WT	WT	WT	WT	WT	WT	WT
ACH-000795	MOLT13_HAEMATOPOIETIC_AND_LYMPHOID_TISSUE	MOLT13_HAEMATOPOIETIC_AND_LYMPHOID_TISSUE	908146	SIDM00433	blood	2.0	female	169.7847622	lymphoid_neoplasm	Caucasian	DSMZ	Suspension; Extremely slow grower	RPMI-1640 +20% FBS	5% DMSO	nan	305.5	Leukemia:ALL	ALL			0.0623733			-4.00293	-4.00293			-0.730775	-0.232648	-0.232648	WT	WT	WT	WT	WT	WT	chr17_7577120-7577120_C>T,chr17_7578212-7578212_G>A,chr17_7579414-7579414_C>T	other non-conserving,damaging,damaging	p.R273H,p.R213*,p.W91*	WT	WT	WT	WT	WT	WT	WT	WT	WT	chr17_8135794-8135794_C>T
ACH-001094	HTK_HAEMATOPOIETIC_AND_LYMPHOID_TISSUE			SIDM00805	plasma_cell	nan	nan	nan	lymphoid_neoplasm	Caucasian	nan	nan	nan	nan	nan	nan	nan	MM													WT	WT	WT	WT	WT	WT	chr17_7578463-7578463_C>G	other non-conserving	p.R156P	WT	WT	WT	WT	WT	WT	WT	WT	WT	WT
ACH-002120	GAK_SKIN	GAK_SKIN	910932	SIDM00543	skin	nan	nan	nan	nan	nan	nan	nan	nan	nan	nan	nan	nan	SKCM			0.186397			-2.42355	-3.81092			0.628068	-0.0272083	-0.0272083	WT	WT	WT	WT	WT	WT	WT	WT	WT	WT	WT	WT	WT	WT	WT	WT	WT	WT	WT
ACH-000240	HS600T_FIBROBLAST			nan	fibroblast	nan	nan	90.39089653	malignant_melanoma	Caucasian	GNF	nan	nan	nan	nan	nan	nan	nan		0.0282862			-5.14376				0.164673				WT	WT	WT	WT	WT	WT	WT	WT	WT	WT	WT	WT	WT	WT	WT	WT	WT	WT	WT
ACH-000666	NCIH1355_LUNG	NCIH1355_LUNG	724866	SIDM00645	lung	53.0	male	137.17097719999998	carcinoma	Caucasian	ATCC	Adherent	DMEM/F12(1:1) +10 % FBS	5% DMSO	nan	157.4	Lung:NSCLC_Adeno	LUAD	2.12346		0.107492	1.08642		-3.2177	-4.60506	-0.497523		-0.0551906	-0.876895	-0.687209	WT	WT	WT	WT	WT	WT	chr17_7577085-7577085_C>T	other non-conserving	p.E285K	WT	WT	WT	WT	WT	WT	WT	WT	WT	WT
ACH-001712	HS860T_BONE			nan	bone
ACH-002238	GRST_HAEMATOPOIETIC_AND_LYMPHOID_TISSUE	GRST_HAEMATOPOIETIC_AND_LYMPHOID_TISSUE	906877	SIDM01259	leukemia	nan	nan	nan	nan	nan	nan	nan	nan	nan	nan	nan	nan	ALL			0.182257			-2.45595	-2.45595			0.600189	1.42251	1.42251	WT	WT	WT	chr6_33287897-33287897_T>C	silent	p.E452E	chr17_7577544-7577544_A>G	other non-conserving	p.M246T	WT	WT	WT	WT	WT	WT	chr7_140494166-140494166_T>C	other non-conserving	p.D361G	chr17_8135357-8135357_G>-
ACH-001559	MERO82_PLEURA			nan	lung																										WT	WT	WT	WT	WT	WT	chr17_7578268-7578268_A>C	other non-conserving	p.L194R	WT	WT	WT	WT	WT	WT	WT	WT	WT	WT
ACH-000559	NCIH1836_LUNG	NCIH1836_LUNG	1240182	SIDM00770	lung	52.0	male	nan	carcinoma	Caucasian	ATCC	Mixed Line	DMEM:HAM's F12 1:1 + 5 % FBS	5%DMSO	nan	183.9	Lung:SCLC	SCLC	4.45013	0.0370168	0.0886309	2.15385	-4.75568	-3.49605	-3.49605	0.61249	0.96357	-0.294671	0.309681	0.461085	WT	WT	WT	WT	WT	WT	chr17_7577551-7577551_C>A	other non-conserving	p.G244C	WT	WT	WT	WT	WT	WT	WT	WT	WT	WT
ACH-000284	HS840T_FIBROBLAST			nan	fibroblast	7.0	male	99.73208336	other	Caucasian	GNF	nan	nan	nan	nan	nan	nan	nan		0.0239503			-5.38381				-0.329494				WT	WT	WT	WT	WT	WT	WT	WT	WT	WT	WT	WT	WT	WT	WT	WT	WT	WT	WT
ACH-001170	PETA_SKIN			nan	skin	nan	nan	nan	nan	nan	nan	nan	nan	nan	nan	nan	nan	nan
ACH-000490	SF767_CENTRAL_NERVOUS_SYSTEM			SIDM00626	central_nervous_system	nan	female	115.88640179999999	glioma	Caucasian	nan	nan	nan	nan	nan	nan	nan	CESC													WT	WT	WT	WT	WT	WT	WT	WT	WT	WT	WT	WT	WT	WT	WT	WT	WT	WT	WT
ACH-000934	MDAMB361_BREAST	MDAMB361_BREAST	908121	SIDM00528	breast	40.0	female	413.99231460000004	carcinoma	Caucasian	ATCC	loosely adherent epithelial	RPMI-20% FBS	5% DMSO	nan	168.2	Breast:Carcinoma	BRCA	4.55609		0.213565	2.1878		-2.22725	-3.61462	0.647796		0.796955	0.182816	0.415306	chrX_76938079-76938079_G>A	other non-conserving	p.S890L	WT	WT	WT	chr17_7579521-7579521_C>A	damaging	p.E56*	WT	WT	WT	WT	WT	WT	chr7_140453136-140453136_A>T	other non-conserving	p.V600E	WT
ACH-002201	TCYIK_CERVIX	TCYIK_CERVIX	946357	SIDM00234	cervix	nan	nan	nan	nan	nan	nan	nan	nan	nan	nan	nan	nan	nan			1.09795			0.134812	-1.25255			2.8292	2.71007	2.71007	WT	WT	WT	WT	WT	WT	WT	WT	WT	WT	WT	WT	WT	WT	WT	WT	WT	WT	WT
ACH-002267	LC41_HAEMATOPOIETIC_AND_LYMPHOID_TISSUE	LC41_HAEMATOPOIETIC_AND_LYMPHOID_TISSUE	907787	SIDM00549	leukemia	nan	nan	nan	nan	nan	nan	nan	nan	nan	nan	nan	nan	ALL			0.0909637			-3.45857	-3.45857			-0.262424	0.349783	0.349783	WT	WT	WT	WT	WT	WT	WT	WT	WT	WT	WT	WT	WT	WT	WT	WT	WT	WT	WT
ACH-000861	HOP62_LUNG	HOP62_LUNG	905972	SIDM00133	lung	nan	nan	236.5238841	carcinoma	Caucasian	Garraway Lab	Adherent	RPMI-1640+ 5% FBS	5% DMSO	nan	37.8	Lung:NSCLC_Others	LUAD			0.110295			-3.18056	-3.18056			-0.0232383	0.647229	0.647229	WT	WT	WT	WT	WT	WT	chr17_7577610-7577610_T>C	damaging	nan	WT	WT	WT	WT	WT	WT	WT	WT	WT	WT
ACH-000349	HCC1500_BREAST	HCC1500_BREAST	1303900	SIDM00879	breast	32.0	female	89.26905347	carcinoma	African_american	ATCC	Epithelial adherent	RPMI-1640+10% FBS	5%DMSO	nan	123.5	Breast:Carcinoma	BRCA	1.902		0.143814	0.927516		-2.79772	-4.18509	-0.662765		0.306141	-0.42755	-0.545157	WT	WT	WT	WT	WT	WT	WT	WT	WT	WT	WT	WT	WT	WT	WT	WT	WT	WT	WT
ACH-001206	TCC466_BONE			nan	bone																										WT	WT	WT	WT	WT	WT	chr17_7578406-7578406_C>T	other non-conserving	p.R175H	WT	WT	WT	WT	WT	WT	WT	WT	WT	WT
ACH-000310	IMR32_AUTONOMIC_GANGLIA			SIDM00226	peripheral_nervous_system	1.0	male	100.7506738	neuroblastoma	Caucasian	NIBRI	nan	nan	nan	nan	nan	PNET:Neuroblastoma	NB													WT	WT	WT	WT	WT	WT	WT	WT	WT	WT	WT	WT	WT	WT	WT	WT	WT	WT	WT
ACH-002257	KINGS1_CENTRAL_NERVOUS_SYSTEM	KINGS1_CENTRAL_NERVOUS_SYSTEM	907279	SIDM00612	central_nervous_system	nan	nan	nan	nan	nan	nan	nan	nan	nan	nan	nan	nan	LGG			0.182426			-2.45462	-3.84198			0.601339	-0.0604482	-0.0604482	WT	WT	WT	WT	WT	WT	chr17_7577538-7577538_C>T,chr17_7577548-7577548_C>T	other non-conserving,other non-conserving	nan,nan	WT	WT	WT	WT	WT	WT	WT	WT	WT	WT
ACH-000374	HCC1143_BREAST	HCC1143_BREAST	749710	SIDM00866	breast	52.0	female	113.65208259999999	carcinoma	Caucasian	ATCC	Adherent	RPMI+10%FBS	5%DMSO	nan	214.2	Breast:Carcinoma	BRCA		0.0181832	0.0371304		-5.78125	-4.75126	-4.75126		-1.14765	-1.37461	-1.03331	-1.03331	WT	WT	WT	WT	WT	WT	chr17_7577538-7577538_C>T	other non-conserving	nan	WT	WT	WT	WT	WT	WT	WT	WT	WT	WT
ACH-001272	FUJI_SOFT_TISSUE			nan	soft_tissue
ACH-002265	LB771HNC_UPPER_AERODIGESTIVE_TRACT	LB771HNC_UPPER_AERODIGESTIVE_TRACT	753583	SIDM00182	upper_aerodigestive	nan	nan	nan	nan	nan	nan	nan	nan	nan	nan	nan	nan	HNSC			0.0439611			-4.50763	-4.50763			-1.165	-0.772644	-0.772644	WT	WT	WT	WT	WT	WT	chr17_7578394-7578394_T>C	other non-conserving	p.H179R	WT	WT	WT	WT	WT	WT	WT	WT	WT	WT
ACH-002296	PCI38_UPPER_AERODIGESTIVE_TRACT	PCI38_UPPER_AERODIGESTIVE_TRACT	1240205	SIDM00155	upper_aerodigestive	nan	nan	nan	nan	nan	nan	nan	nan	nan	nan	nan	nan	HNSC			0.049165			-4.34622	-4.34622			-1.02614	-0.599953	-0.599953	WT	WT	WT	WT	WT	WT	chr17_7579546-7579547_->G	damaging	p.P47fs	WT	WT	WT	WT	WT	WT	WT	WT	WT	WT
ACH-002131	NCIH2803_PLEURA	NCIH2803_PLEURA	1240135	SIDM00309	lung	nan	nan	nan	nan	nan	nan	nan	nan	nan	nan	nan	nan	MESO			0.136498			-2.87305	-4.26041			0.241335	-0.508142	-0.508142	WT	WT	WT	WT	WT	WT	WT	WT	WT	WT	WT	WT	WT	WT	WT	WT	WT	WT	WT
ACH-000484	VMRCRCW_KIDNEY	VMRCRCW_KIDNEY	1240224	SIDM00318	kidney	nan	male	107.45062639999999	carcinoma	Caucasian	nan	adherent	EMEM+10%FBS	5%DMSO	nan	nan	Kidney:Carcinoma	KIRC			0.0356775			-4.80884	-4.80884			-1.42416	-1.09492	-1.09492	WT	WT	WT	WT	WT	WT	chr17_7574035-7574035_T>C	damaging	nan	chr3_10191487-10191488_GC>-	damaging	p.R161fs	WT	WT	WT	WT	WT	WT	WT
ACH-001228	UPCISCC152_UPPER_AERODIGESTIVE_TRACT			SIDM00398	upper_aerodigestive																										WT	WT	WT	WT	WT	WT	WT	WT	WT	WT	WT	WT	WT	WT	WT	WT	WT	WT	WT
ACH-000405	MEC1_HAEMATOPOIETIC_AND_LYMPHOID_TISSUE			SIDM00001	blood	61.0	male	123.85837830000001	lymphoid_neoplasm	Caucasian	DSMZ	round to polymorphic cells growing in suspention, singly or partly in small aggregates, a few cells are slightly adherent	90% Iscove's MDM +10% h. i. FBS	nan	~ 40 hrs	nan	Leukemia:CLL	CLL		0.0351184			-4.83163				0.807211				WT	WT	WT	WT	WT	WT	chr17_7576896-7576897_->G	damaging	p.Q317fs	WT	WT	WT	WT	WT	WT	WT	WT	WT	WT
ACH-001699	UPCISCC131_UPPER_AERODIGESTIVE_TRACT			nan	upper_aerodigestive																										WT	WT	WT	WT	WT	WT	chr17_7579311-7579311_C>T	damaging	nan	WT	WT	WT	WT	WT	WT	WT	WT	WT	chr17_8134781-8134781_T>C
ACH-001108	KP1NL_PANCREAS			nan	pancreas	69.0	male	nan	carcinoma	Caucasian	nan	nan	nan	nan	nan	nan	nan	PAAD													WT	WT	WT	WT	WT	WT	chr17_7577120-7577120_C>T	other non-conserving	p.R273H	WT	WT	WT	WT	WT	WT	WT	WT	WT	WT
ACH-000123	COV434_OVARY			nan	ovary	nan	female	88.95089442	sex_cord-stromal_tumour	Caucasian	ECACC	nan	nan	nan	nan	nan	Ovary:Germline	OV													WT	WT	WT	WT	WT	WT	WT	WT	WT	WT	WT	WT	WT	WT	WT	WT	WT	WT	WT
ACH-000258	DU4475_BREAST	DU4475_BREAST	906844	SIDM01001	breast	62.0	female	107.2866384	carcinoma	Caucasian	ATCC	suspension, multicell aggregates	RPMI-1640 + 10% FBS	5%DMSO	nan	145.6	Breast:Carcinoma	BRCA	3.3526		0.227935	1.74528		-2.13331	-3.52067	0.187622		0.877784	0.283333	0.235478	WT	WT	WT	WT	WT	WT	WT	WT	WT	WT	WT	WT	WT	WT	WT	chr7_140453136-140453136_A>T	other non-conserving	p.V600E	WT
ACH-000278	COV362_OVARY			nan	ovary	nan	female	107.93204809999999	carcinoma	Caucasian	ECACC	adherent, polygonal & fusiform	DMEM+10% FBS	5%DMSO	nan	77.0	Ovary:Carcinoma	OV	1.77738			0.82975				-0.764431				-0.764431	WT	WT	WT	WT	WT	WT	chr17_7578190-7578190_T>C	other non-conserving	p.Y220C	WT	WT	WT	WT	WT	WT	WT	WT	WT	WT
ACH-000232	U251MG_CENTRAL_NERVOUS_SYSTEM	U251MG_CENTRAL_NERVOUS_SYSTEM	905983	SIDM00111	central_nervous_system	nan	male	78.37300866	glioma	Caucasian	GNF	nan	nan	nan	nan	nan	CNS:Glioma	GBM	3.09835		0.167573	1.6315		-2.57714	-3.9645	0.0693057		0.495926	-0.191538	-0.0611162	WT	WT	WT	WT	WT	WT	chr17_7577120-7577120_C>T	other non-conserving	p.R273H	WT	WT	WT	WT	WT	WT	WT	WT	WT	WT
ACH-000195	SET2_HAEMATOPOIETIC_AND_LYMPHOID_TISSUE			SIDM00397	blood	71.0	female	122.34250949999999	haematopoietic_neoplasm	Asian	nan	suspension	RPMI-1640 + 20% FBS	5%DMSO	nan	59.7	Leukemia:MPD	nan													WT	WT	WT	WT	WT	WT	chr17_7577539-7577539_G>A,chr17_7578369-7578369_A>T	other non-conserving,damaging	p.R248W,nan	WT	WT	WT	WT	WT	WT	WT	WT	WT	WT
ACH-001562	MERO95_PLEURA			nan	lung																										WT	WT	WT	WT	WT	WT	WT	WT	WT	WT	WT	WT	WT	WT	WT	WT	WT	WT	WT
ACH-002269	LNZTA3WT4_CENTRAL_NERVOUS_SYSTEM	LNZTA3WT4_CENTRAL_NERVOUS_SYSTEM	1240170	SIDM01220	central_nervous_system	nan	nan	nan	nan	nan	nan	nan	nan	nan	nan	nan	nan	GBM			0.223888			-2.15915	-3.54652			0.855548	0.25568	0.25568	WT	WT	WT	WT	WT	WT	WT	WT	WT	WT	WT	WT	WT	WT	WT	WT	WT	WT	WT
ACH-001321	TT_THYROID	TT_THYROID		SIDM00484	thyroid	77.0	female	85.58672632	carcinoma	Caucasian	NIBRI	nan	nan	nan	nan	nan	Oesophagus:Carcinoma	THCA		0.0300512	0.0556982		-5.05643	-4.16623	-4.16623		0.34444	-0.871271	-0.407366	-0.407366	WT	WT	WT	WT	WT	WT	WT	WT	WT	WT	WT	WT	WT	WT	WT	WT	WT	WT	WT
ACH-001370	OCIP5X_OVARY			nan	ovary																										chrX_76814295-76814295_T>G	other non-conserving	p.T2117P	WT	WT	WT	chr17_7577575-7577575_A>T	other non-conserving	p.Y236N	WT	WT	WT	WT	WT	WT	chr7_140453136-140453136_A>T	other non-conserving	p.V600E	WT
ACH-001543	KOSC2CL343_UPPER_AERODIGESTIVE_TRACT			nan	upper_aerodigestive																										WT	WT	WT	WT	WT	WT	chr17_7579532-7579533_->ATG	other non-conserving	p.52_52Q>P*	WT	WT	WT	WT	WT	WT	WT	WT	WT	WT
ACH-000447	NCIH2228_LUNG	NCIH2228_LUNG	687816	SIDM00729	lung	nan	female	108.30707759999999	carcinoma	Caucasian	nan	AHDHERENT; `	RPMI-1640+10%FBS	5%DMSO	nan	88.8	Lung:NSCLC_Adeno	LUAD	1.50961		0.0732618	0.594176		-3.7708	-5.15816	-1.0094		-0.531056	-1.46867	-1.23904	WT	WT	WT	WT	WT	WT	chr17_7576855-7576855_G>A	damaging	p.Q331*	WT	WT	WT	WT	WT	WT	WT	WT	WT	WT
ACH-001861	TGBC1TKB_BILIARY_TRACT	TGBC1TKB_BILIARY_TRACT		SIDM00252	bile_duct	nan	nan	nan	nan	nan	nan	nan	nan	nan	nan	nan	nan	nan			0.149362			-2.74311	-2.74311			0.353125	1.11527	1.11527	WT	WT	WT	WT	WT	WT	chr17_7578404-7578405_->GCGC	damaging	p.C176fs	WT	WT	WT	WT	WT	WT	WT	WT	WT	WT
ACH-001203	SUPHD1_HAEMATOPOIETIC_AND_LYMPHOID_TISSUE	SUPHD1_HAEMATOPOIETIC_AND_LYMPHOID_TISSUE	1331039	SIDM00422	lymphocyte	37.0	male	nan	lymphoid_neoplasm	Caucasian	DSMZ	Supsension	McCOY'S 5A+20% FBS	5% DMSO	nan	nan	nan	nan		0.0204957	0.0528999		-5.60853	-4.24059	-4.24059		-0.792107	-0.935252	-0.486932	-0.486932	WT	WT	WT	WT	WT	WT	WT	WT	WT	WT	WT	WT	WT	WT	WT	WT	WT	WT	chr17_8141801-8141801_C>T
ACH-000394	NCIH2081_LUNG	NCIH2081_LUNG	908480	SIDM00710	lung	59.0	female	111.39864340000001	carcinoma	Caucasian	NIBRI	nan	nan	nan	nan	nan	Lung:SCLC	SCLC	2.37328		0.162765	1.24688		-2.61914	-4.0065	-0.330657		0.459791	-0.236474	-0.283566	chrX_76888825-76888825_C>A,chrX_76937401-76937401_G>C	other non-conserving,other non-conserving	p.M1668I,p.S1116C	chr6_33288658-33288658_G>C	silent	p.A298A	WT	WT	WT	WT	WT	WT	WT	WT	WT	WT	WT	WT	WT
ACH-001188	SHSY5Y_AUTONOMIC_GANGLIA			SIDM01236	peripheral_nervous_system	4.0	female	nan	neuroblastoma	nan	ATCC	nan	DMEM:F12 +10% FBS	5%DMSO	nan	88.1	nan	NB													WT	WT	WT	WT	WT	WT	WT	WT	WT	WT	WT	WT	WT	WT	WT	WT	WT	WT	WT
ACH-000949	TGBC11TKB_STOMACH	TGBC11TKB_STOMACH	909770	SIDM00251	gastric	nan	female	506.6036089	carcinoma	Asian	RIKEN	epithelial-like	DMEM +5%FBS	nan	nan	nan	Gastric:Carcinoma	STAD			0.305145			-1.71243	-3.0998			1.23989	0.733638	0.733638	WT	WT	WT	chr6_33287524-33287524_C>A	damaging	p.G525*	chr17_7572963-7572963_T>-,chr17_7577121-7577121_G>A	damaging,other non-conserving	p.K382fs,p.R273C	WT	WT	WT	WT	WT	WT	WT	WT	WT	chr17_8133223-8133224_->G
ACH-000920	CMLT1_HAEMATOPOIETIC_AND_LYMPHOID_TISSUE	CMLT1_HAEMATOPOIETIC_AND_LYMPHOID_TISSUE	910951	SIDM00958	blood	36.0	female	383.5382966	haematopoietic_neoplasm	Asian	DSMZ	single, round cells insuspension	90 % Iscove's MDMD or RPMI 1640 + 10% h.i. FBS	nan	~ 48-60 hrs	nan	Leukemia:CML	LCML		0.0317646	0.171413		-4.97644	-2.54445	-2.54445		0.509119	0.524048	1.32782	1.32782	WT	WT	WT	WT	WT	WT	chr17_7577070-7577070_G>A,chr17_7578389-7578389_G>A	other non-conserving,other non-conserving	p.R290C,p.R181C	WT	WT	WT	WT	WT	WT	WT	WT	WT	chr17_8133714-8133714_G>-
ACH-002230	D542MG_CENTRAL_NERVOUS_SYSTEM	D542MG_CENTRAL_NERVOUS_SYSTEM	753549	SIDM00207	central_nervous_system	nan	nan	nan	nan	nan	nan	nan	nan	nan	nan	nan	nan	GBM			0.126903			-2.9782	-4.36557			0.150864	-0.620649	-0.620649	WT	WT	WT	WT	WT	WT	chr17_7577548-7577548_C>T	other non-conserving	nan	WT	WT	WT	WT	WT	WT	WT	WT	WT	WT
ACH-001959	CCLP1_BILIARY_TRACT			nan	bile_duct																										WT	WT	WT	WT	WT	WT	chr17_7577022-7577022_G>A	damaging	p.R306*	WT	WT	WT	WT	WT	WT	WT	WT	WT	WT
ACH-000321	MOLM6_HAEMATOPOIETIC_AND_LYMPHOID_TISSUE			nan	blood	44.0	male	175.6826251	haematopoietic_neoplasm	Asian	DSMZ	SUSPENSION	RPMI-1640 +20%FBS	5% DMSO	nan	78.8	Leukemia:CML	LCML		0.0230434			-5.4395				-0.444136				WT	WT	WT	WT	WT	WT	chr17_7577538-7577538_C>T	other non-conserving	nan	WT	WT	WT	WT	WT	WT	WT	WT	WT	WT
ACH-001786	SNU1544_LARGE_INTESTINE			nan	colorectal																										chrX_76888742-76888742_T>C,chrX_76938964-76938964_A>G	other non-conserving,other non-conserving	p.K1696R,p.L595P	WT	WT	WT	WT	WT	WT	WT	WT	WT	WT	WT	WT	WT	WT	WT	WT
ACH-000143	HCC2429_LUNG			nan	lung	nan	nan	nan	nan	nan	nan	nan	nan	nan	nan	nan	nan	nan													WT	WT	WT	WT	WT	WT	chr17_7577138-7577138_C>T	other non-conserving	p.R267Q	WT	WT	WT	WT	WT	WT	WT	WT	WT	WT
ACH-002215	BC3_PLEURA	BC3_HAEMATOPOIETIC_AND_LYMPHOID_TISSUE	910918	SIDM00895	lymphoma	nan	nan	nan	nan	nan	nan	nan	nan	nan	nan	nan	nan	DLBC			0.0423762			-4.5606	-4.5606			-1.21058	-0.829322	-0.829322	WT	WT	WT	WT	WT	WT	WT	WT	WT	WT	WT	WT	WT	WT	WT	WT	WT	WT	WT
ACH-000084	MUTZ3_HAEMATOPOIETIC_AND_LYMPHOID_TISSUE			nan	blood	29.0	male	83.53472646	haematopoietic_neoplasm	Caucasian	DSMZ	Suspension; Extremely slow grower	MEM + 20% FBS	10%DMSO	nan	nan	nan	LAML													WT	WT	WT	WT	WT	WT	WT	WT	WT	WT	WT	WT	WT	WT	WT	WT	WT	WT	WT
ACH-000200	NMCG1_CENTRAL_NERVOUS_SYSTEM	NMCG1_CENTRAL_NERVOUS_SYSTEM	908449	SIDM00575	central_nervous_system	nan	nan	99.42966602	glioma	Asian	HSSRB	Adherent	DMEM +10%FBS	5% DMSO	nan	137.9	CNS:Glioma	LGG			0.0789921			-3.66215	-5.04951			-0.437579	-1.35242	-1.35242	WT	WT	WT	WT	WT	WT	WT	WT	WT	WT	WT	WT	WT	WT	WT	chr7_140453136-140453136_A>T	other non-conserving	p.V600E	WT
ACH-001373	OV17R_OVARY	OV17R_OVARY	1480361	SIDM00476	ovary	nan	nan	nan	nan	nan	nan	nan	nan	nan	nan	nan	nan	OV			0.0603629			-4.05019	-4.05019			-0.771441	-0.28322	-0.28322	WT	WT	WT	WT	WT	WT	chr17_7578203-7578203_C>T	other non-conserving	p.V216M	WT	WT	WT	WT	WT	WT	WT	WT	WT	WT
ACH-002226	D336MG_CENTRAL_NERVOUS_SYSTEM	D336MG_CENTRAL_NERVOUS_SYSTEM	946369	SIDM00620	central_nervous_system	nan	nan	nan	nan	nan	nan	nan	nan	nan	nan	nan	nan	LGG			0.105081			-3.25043	-4.63779			-0.0833482	-0.911911	-0.911911	WT	WT	WT	WT	WT	WT	chr17_7577539-7577539_G>A	other non-conserving	p.R248W	WT	WT	WT	WT	WT	WT	WT	WT	WT	WT
ACH-000731	HCC2279_LUNG			nan	lung	52.0	female	189.5257761	carcinoma	Asian	KCLB	epithelial; monolayer	RPMI 1640 with L-glutamine (300mg/L), 90%; heat inactivated fetal bovine serum (FBs),10%	nan	nan	nan	Lung:NSCLC_Adeno	LUAD													WT	WT	WT	WT	WT	WT	chr17_7577580-7577580_T>C	other non-conserving	p.Y234C	WT	WT	WT	WT	WT	WT	WT	WT	WT	WT
ACH-002364	NCIBL1437_MATCHED_NORMAL_TISSUE	NCIBL1437_Matched_Normal_Tissue		nan	non_cancerous																0.0836958			-3.5787	-3.5787			-0.365785	0.221246	0.221246	WT	WT	WT	WT	WT	WT	WT	WT	WT	WT	WT	WT	WT	WT	WT	WT	WT	WT	WT
ACH-001198	SNB19_CENTRAL_NERVOUS_SYSTEM			SIDM00109	central_nervous_system	47.0	male	nan	glioma	Caucasian	nan	nan	nan	nan	nan	nan	nan	LGG
ACH-001561	MERO84_PLEURA			nan	lung																										WT	WT	WT	WT	WT	WT	WT	WT	WT	WT	WT	WT	WT	WT	WT	WT	WT	WT	WT
ACH-002319	184A1_BREAST			nan	breast
ACH-000726	TE14_OESOPHAGUS			nan	esophagus	nan	nan	186.24315719999998	carcinoma	Asian	RIKEN	epithelial-like	RPMI 1640 +10%FBS	nan	nan	nan	Oesophagus:Carcinoma	ESCA		0.0301569			-5.05137				0.354863				WT	WT	WT	WT	WT	WT	chr17_7578212-7578212_G>A	damaging	p.R213*	WT	WT	WT	WT	WT	WT	WT	WT	WT	chr17_8134723-8134723_C>T
ACH-001363	NCIH2135_LUNG	NCIH2135_LUNG	1298352	SIDM00700	lung	nan	nan	nan	nan	nan	nan	nan	nan	nan	nan	nan	nan	UNABLE TO CLASSIFY			0.179841			-2.47521	-2.47521			0.583625	1.40191	1.40191	WT	WT	WT	WT	WT	WT	chr17_7577108-7577108_C>A	other non-conserving	p.C277F	WT	WT	WT	WT	WT	WT	WT	WT	WT	WT
ACH-001225	UMRC6_KIDNEY			nan	kidney	nan	nan	nan	carcinoma	nan	nan	nan	nan	nan	nan	nan	nan	KIRC
ACH-000671	HUH6_LIVER			SIDM00062	liver	nan	male	174.0189681	other	Asian	RIKEN	epithelial-like	DMEM + 10%FBS	nan	nan	nan	Liver:Hepatoblastoma	LIHC		0.0196099			-5.67228				-0.923322				WT	WT	WT	WT	WT	WT	chr17_7577566-7577566_T>C,chr17_7578454-7578454_G>T	other non-conserving,other non-conserving	p.N239D,p.A159D	WT	WT	WT	WT	WT	WT	WT	WT	WT	WT
ACH-002058	ATN1_HAEMATOPOIETIC_AND_LYMPHOID_TISSUE	ATN1_HAEMATOPOIETIC_AND_LYMPHOID_TISSUE		SIDM00233	blood	nan	nan	nan	nan	nan	nan	nan	nan	nan	nan	nan	nan	ALL			0.0251866			-5.3112	-5.3112			-1.85637	-1.63241	-1.63241	WT	WT	WT	WT	WT	WT	chr17_7577124-7577124_C>G	other non-conserving	p.V272L	WT	WT	WT	WT	WT	WT	WT	WT	WT	WT
ACH-000017	SKBR3_BREAST			SIDM00897	breast	43.0	female	170.5817104	carcinoma	Caucasian	NIBRI	nan	nan	nan	nan	95.3	Breast:Carcinoma	BRCA													WT	WT	WT	WT	WT	WT	chr17_7578406-7578406_C>T	other non-conserving	p.R175H	WT	WT	WT	WT	WT	WT	WT	WT	WT	WT
ACH-000797	HLFA_FIBROBLAST			nan	fibroblast	54.0	female	163.0529962	carcinoma	African_american	GNF	Adherent Fibroblast	EMEM+10%FBS	5%DMSO	nan	nan	Lung:NSCLC_Squamous	LUSC		0.0288593			-5.11482				0.224245				chrX_76938874-76938874_T>C	other non-conserving	p.E625G	WT	WT	WT	WT	WT	WT	WT	WT	WT	WT	WT	WT	WT	WT	WT	WT
ACH-001536	KKU100_BILIARY_TRACT			nan	bile_duct																										WT	WT	WT	WT	WT	WT	WT	WT	WT	WT	WT	WT	WT	WT	WT	WT	WT	WT	WT
ACH-002104	ES3_BONE	ES3_BONE	684055	SIDM00265	bone	nan	nan	nan	nan	nan	nan	nan	nan	nan	nan	nan	nan	nan			0.487452			-1.03667	-2.42403			1.82129	1.45666	1.45666	WT	WT	WT	WT	WT	WT	chr17_7577573-7577573_G>T,chr17_7578406-7578406_C>T	damaging,other non-conserving	p.Y236*,p.R175H	WT	WT	WT	WT	WT	WT	WT	WT	WT	WT
ACH-000248	AU565_BREAST	AU565_BREAST	910704	SIDM00898	breast	43.0	female	223.3824299	carcinoma	Caucasian	ATCC	Adherenet	RPMI 1640 + 10%FBS	5% DMSO	nan	74.1	Breast:Carcinoma	BRCA	2.18446		0.100206	1.12727		-3.31896	-4.70633	-0.455038		-0.142312	-0.985236	-0.720137	WT	WT	WT	WT	WT	WT	chr17_7578406-7578406_C>T	other non-conserving	p.R175H	WT	WT	WT	WT	WT	WT	WT	WT	WT	WT
ACH-000637	KYSE520_OESOPHAGUS	KYSE520_OESOPHAGUS	753575	SIDM01025	esophagus	58.0	female	168.9136858	carcinoma	Asian	DSMZ	Adherent	RPMI 1640 +10%FBS	5% DMSO	nan	121.8	Oesophagus:Carcinoma	ESCA	2.51318		0.136281	1.32951		-2.87534	-4.26271	-0.244728		0.23936	-0.510598	-0.377663	WT	WT	WT	WT	WT	WT	chr17_7578556-7578556_T>A	damaging	nan	WT	WT	WT	WT	WT	WT	WT	WT	WT	WT
ACH-000042	PANC0203_PANCREAS	PANC0203_PANCREAS	1298475	SIDM01139	pancreas	70.0	female	65.59323234	carcinoma	Caucasian	ATCC	adherent	RPMI + 10% FBS	5% DMSO	nan	102.2	Pancreas:Carcinoma	PAAD		0.0144751	0.030746		-6.11029	-5.02346	-5.02346		-1.82501	-1.6088	-1.32455	-1.32455	WT	WT	WT	WT	WT	WT	chr17_7577538-7577538_C>T	other non-conserving	nan	WT	WT	WT	chr2_209116293-209116293_T>A	damaging	nan	WT	WT	WT	WT
ACH-000960	REH_HAEMATOPOIETIC_AND_LYMPHOID_TISSUE	REH_HAEMATOPOIETIC_AND_LYMPHOID_TISSUE	909696	SIDM00447	blood	15.0	female	485.4417353999999	lymphoid_neoplasm	Caucasian	ATCC	Lymphoblast suspension	RPMI 1640+10%FBS	5%DMSO	nan	62.7	Leukemia:ALL	ALL			0.238813			-2.06605	-2.06605			0.935652	1.83968	1.83968	chrX_76812932-76812932_A>G	other non-conserving	p.M2230T	WT	WT	WT	chr17_7578389-7578389_G>A	other non-conserving	p.R181C	WT	WT	WT	WT	WT	WT	WT	WT	WT	WT
ACH-000133	HS729_SOFT_TISSUE			nan	fibroblast	74.0	male	87.60606729999999	rhabdomyosarcoma	Caucasian	NIBRI	nan	nan	nan	nan	nan	Soft_Tissue:Sarcoma_Rhabdoid	SARC		0.0460995			-4.4391				1.61526				chrX_76890109-76890109_A>T	damaging	p.C1595*	WT	WT	WT	chr17_7578394-7578394_T>C	other non-conserving	p.H179R	WT	WT	WT	WT	WT	WT	WT	WT	WT	WT
ACH-001654	SKGT4_OESOPHAGUS	SKGT4_OESOPHAGUS	1503365	SIDM00483	esophagus	nan	nan	nan	nan	nan	nan	nan	nan	nan	nan	nan	nan	ESCA			0.0431979			-4.5329	-4.5329			-1.18674	-0.799678	-0.799678	WT	WT	WT	WT	WT	WT	chr17_7579389-7579389_G>A	damaging	p.Q100*	WT	WT	WT	WT	WT	WT	WT	WT	WT	WT
ACH-000825	HOP92_LUNG	HOP92_LUNG	905973	SIDM00134	lung	nan	nan	198.739234	carcinoma	Caucasian	Garraway Lab	Mix	RPMI-1640+ 5% FBS	5% DMSO	nan	122.2	Lung:NSCLC_Others	nan			0.185956			-2.42697	-3.81433			0.625128	-0.0308646	-0.0308646	WT	WT	WT	WT	WT	WT	chr17_7578406-7578406_C>A	other non-conserving	p.R175L	WT	WT	WT	WT	WT	WT	WT	WT	WT	WT
ACH-000222	ASPC1_PANCREAS	ASPC1_PANCREAS	910702	SIDM00899	pancreas	62.0	female	88.07978724	carcinoma	Caucasian	ATCC	Adherent	RPMI-1640 10% FBS +1 mM Sodium pyruvate	5%DMSO	nan	171.5	Pancreas:Carcinoma	PAAD			0.136434			-2.87372	-4.26109			0.240753	-0.508866	-0.508866	WT	WT	WT	WT	WT	WT	chr17_7578527-7578527_A>-	damaging	p.C135fs	WT	WT	WT	WT	WT	WT	WT	WT	WT	WT
ACH-000391	MHHES1_BONE	MHHES1_BONE	908134	SIDM00386	bone	12.0	male	101.0836765	Ewings_sarcoma-peripheral_primitive_neuroectodermal_tumour	Caucasian	DSMZ	adherent cells of various size, single or in small clusters, growing as monolayer	90% RPMI 1640 +10% h. i. FBS	nan	~ 28 hrs	nan	Bone:Sarcoma_Ewing	SARC			0.0722843			-3.79017	-3.79017			-0.547729	-0.00501598	-0.00501598	chrX_76939673-76939674_->T	damaging	p.L359fs	WT	WT	WT	chr17_7578204-7578206_ACT>-	other non-conserving	p.S215del	WT	WT	WT	WT	WT	WT	WT	WT	WT	WT
ACH-000979	DU145_PROSTATE	DU145_PROSTATE	905935	SIDM00120	prostate	69.0	male	762.9231087999999	carcinoma	Caucasian	ATCC	ADHERENT EPITHELIAL;	EMEM + 10% FBS	5% DMSO	nan	161.0	Prostate:Carcinoma	PRAD	1.72871		0.0390408	0.789697		-4.67887	-4.67887	-0.806082		-1.31234	-0.955865	-0.880973	WT	WT	WT	WT	WT	WT	chr17_7577118-7577118_C>A,chr17_7578181-7578181_G>A	other non-conserving,other non-conserving	p.V274F,p.P223L	WT	WT	WT	WT	WT	WT	chr7_140439615-140439615_G>A	silent	p.P708P	chr17_8139251-8139251_C>G
ACH-001065	EVSAT_BREAST	EVSAT_BREAST	906862	SIDM01042	breast	nan	female	nan	carcinoma	Caucasian	nan	nan	nan	nan	nan	nan	nan	BRCA			0.150715			-2.73011	-4.11747			0.364318	-0.355202	-0.355202	WT	WT	WT	WT	WT	WT	chr17_7577559-7577559_G>C	other non-conserving	p.S241C	WT	WT	WT	WT	WT	WT	WT	WT	WT	WT
ACH-000874	RS411_HAEMATOPOIETIC_AND_LYMPHOID_TISSUE	RS411_HAEMATOPOIETIC_AND_LYMPHOID_TISSUE	909703	SIDM01086	blood	32.0	female	266.6254865	lymphoid_neoplasm	Caucasian	ATCC	Suspension	RPMI-1640+10% FBS	5%DMSO	nan	181.7	Leukemia:ALL	ALL			0.183464			-2.44643	-2.44643			0.608382	1.4327	1.4327	WT	WT	WT	WT	WT	WT	WT	WT	WT	WT	WT	WT	WT	WT	WT	WT	WT	WT	WT
ACH-000891	HCC1438_LUNG			nan	lung	43.0	male	270.8323858	carcinoma	African_american	KCLB	epithelial; monolayer	RPMI 1640 with L-glutamine (300mg/L), 90%; heat inactivated fetal bovine serum (FBS),10%	nan	nan	nan	Lung:NSCLC_Large_Cell	nan		0.016131			-5.95402				-1.50331				WT	WT	WT	WT	WT	WT	chr17_7578513-7578513_C>-	damaging	p.K139fs	WT	WT	WT	WT	WT	WT	WT	WT	WT	WT
ACH-002322	HCC2185_BREAST			nan	breast
ACH-002024	ECC4_LARGE_INTESTINE			SIDM00069	colorectal																										WT	WT	WT	WT	WT	WT	WT	WT	WT	WT	WT	WT	WT	WT	WT	WT	WT	WT	WT
ACH-000856	CAL51_BREAST	CAL51_BREAST	910927	SIDM00933	breast	45.0	female	206.8416265	carcinoma	Caucasian	DSMZ	epithelial-like adherent cells growing in monolayers; the culture contains usually a large amount of cell debris	80% Dulbecco's MEM(4.5g/L glucose) +20% h.i.FBS	10%DMSO	>60 hrs	26.8	Breast:Carcinoma	BRCA	3.90407		0.31644	1.96498		-1.66	-3.04736	0.416087		1.285	0.789742	0.602915	chrX_76939924-76939924_T>-	damaging	p.D275fs	WT	WT	WT	WT	WT	WT	WT	WT	WT	WT	WT	WT	WT	WT	WT	WT
ACH-000873	KYSE270_OESOPHAGUS	KYSE270_OESOPHAGUS	907319	SIDM01029	esophagus	79.0	male	245.3804386	carcinoma	Asian	DSMZ	Adherent	RPMI + 10 % FBS	5% DMSO	nan	153.6	Oesophagus:Carcinoma	ESCA			0.158956			-2.6533	-4.04067			0.430398	-0.273027	-0.273027	WT	WT	WT	WT	WT	WT	chr17_7578370-7578370_C>T	damaging	nan	WT	WT	WT	WT	WT	WT	WT	WT	WT	WT
ACH-001794	93T449_SOFT_TISSUE			nan	soft_tissue																										WT	WT	WT	WT	WT	WT	WT	WT	WT	WT	WT	WT	WT	WT	WT	WT	WT	WT	WT
ACH-001277	YAMATO_SOFT_TISSUE			nan	soft_tissue																										WT	WT	WT	WT	WT	WT	chr17_7577121-7577121_G>A	other non-conserving	p.R273C	WT	WT	WT	WT	WT	WT	WT	WT	WT	WT
ACH-000086	ACCMESO1_PLEURA			nan	lung	nan	nan	112.02054509999999	mesothelioma	Asian	RIKEN	fibroblast-like	RPMI 1640 +10% FBS	nan	nan	nan	Lung:Mesothelioma	MESO		0.0201663			-5.63191				-0.84022				chrX_76939673-76939674_->T	damaging	p.L359fs	WT	WT	WT	WT	WT	WT	WT	WT	WT	WT	WT	WT	WT	WT	WT	WT
NA3		JHU028_Matched_Normal_Tissue			non_cancerous																0.0579259			-4.10965	-4.10965			-0.822593	-0.346831	-0.346831
ACH-000206	C8166_HAEMATOPOIETIC_AND_LYMPHOID_TISSUE			SIDM00072	lymphocyte	nan	nan	nan	nan	nan	nan	nan	nan	nan	nan	nan	nan	nan													WT	WT	WT	WT	WT	WT	WT	WT	WT	WT	WT	WT	WT	WT	WT	WT	WT	WT	WT
ACH-000587	NCIH1975_LUNG	NCIH1975_LUNG	924244	SIDM00759	lung	nan	female	121.50856759999999	carcinoma	Caucasian	ATCC	ADHERENT EPITHELIAL;	RPMI-1640+10%FBS	5%DMSO	nan	52.6	Lung:NSCLC_Adeno	LUAD	4.47505		0.256554	2.16191		-1.96267	-3.35003	0.62087		1.0246	0.465906	0.543388	WT	WT	WT	WT	WT	WT	chr17_7577120-7577120_C>T	other non-conserving	p.R273H	WT	WT	WT	WT	WT	WT	WT	WT	WT	WT
ACH-002347	CP66EBV_MATCHED_NORMAL_TISSUE	CP66EBV_Matched_Normal_Tissue		nan	non_cancerous																0.174278			-2.52054	-2.52054			0.544623	1.35341	1.35341	WT	WT	WT	WT	WT	WT	WT	WT	WT	WT	WT	WT	WT	WT	WT	WT	WT	WT	WT
ACH-000888	NCIH1793_LUNG	NCIH1793_LUNG	908463	SIDM00755	lung	52.0	female	282.92196889999997	carcinoma	Caucasian	ATCC	adherent; epithelial	DMEM:F12	5% DMSO	nan	98.1	Lung:NSCLC_Adeno	LUAD	1.26271		0.104133	0.336523		-3.2635	-4.65087	-1.27733		-0.0945971	-0.9259	-1.10162	WT	WT	WT	WT	WT	WT	chr17_7577120-7577120_C>T,chr17_7578224-7578224_T>A	other non-conserving,damaging	p.R273H,p.R209*	WT	WT	WT	WT	WT	WT	WT	WT	WT	chr17_8139149-8139149_C>A
ACH-000099	SIMA_AUTONOMIC_GANGLIA	SIMA_AUTONOMIC_GANGLIA	753620	SIDM00395	peripheral_nervous_system	1.6666	male	84.11208291	neuroblastoma	Caucasian	DSMZ	cell shape is bipolar, cells growing as monolayer or forming foci	90% RPMI 1640 +10% h.i. FBS	nan	highly variable ~ 34-100 hrs	nan	PNET:Neuroblastoma	NB		0.0429992	0.0675364		-4.53955	-3.88819	-3.88819		1.40849	-0.632059	-0.109888	-0.109888	WT	WT	WT	WT	WT	WT	WT	WT	WT	WT	WT	WT	WT	WT	WT	WT	WT	WT	WT
ACH-001193	SKPNDW_BONE	SKPNDW_BONE	909731	SIDM01097	bone	nan	nan	nan	nan	nan	nan	nan	nan	nan	nan	nan	nan	nan			0.120149			-3.0571	-4.44447			0.0829801	-0.705068	-0.705068	WT	WT	WT	WT	WT	WT	chr17_7578403-7578403_C>A	other non-conserving	p.C176F	WT	WT	WT	WT	WT	WT	WT	WT	WT	WT
ACH-002208	YMB1E_BREAST	YMB1E_BREAST	1303911	SIDM01261	breast	nan	nan	nan	nan	nan	nan	nan	nan	nan	nan	nan	nan	BRCA			0.0253778			-5.30029	-5.30029			-1.84698	-1.62074	-1.62074	WT	WT	WT	WT	WT	WT	WT	WT	WT	WT	WT	WT	WT	WT	WT	WT	WT	WT	WT
ACH-000190	HDMYZ_HAEMATOPOIETIC_AND_LYMPHOID_TISSUE	HDMYZ_HAEMATOPOIETIC_AND_LYMPHOID_TISSUE	907050	SIDM01063	lymphocyte	29.0	nan	105.11291820000001	lymphoid_neoplasm	Caucasian	nan	Variable morphology	RPMI-1640+10% FBS	5%DMSO	nan	43.6	Lymphoma:Hodgkin	nan			0.0484238			-4.36814	-4.36814			-1.04499	-0.623401	-0.623401	WT	WT	WT	WT	WT	WT	chr17_7577575-7577585_AGTTGTAGTGG>-	damaging	p.HYNY233fs	WT	WT	WT	WT	WT	WT	WT	WT	WT	WT
ACH-001091	HRT18_LARGE_INTESTINE			SIDM00788	colorectal	67.0	male	nan	carcinoma	nan	nan	nan	nan	nan	nan	nan	nan	COAD/READ													chrX_76938862-76938862_A>C	other non-conserving	p.L629R	chr6_33289693-33289693_C>T	other non-conserving	p.A4T	WT	WT	WT	WT	WT	WT	chr2_209113217-209113217_C>T	other non-conserving	p.G97D	WT	WT	WT	WT
ACH-000705	LC1F_LUNG			SIDM00298	lung	69.0	male	196.93834819999998	carcinoma	Asian	RIKEN	Mixed cell line.	RPMI-1640+10%FBS	5%DMSO	nan	nan	Lung:NSCLC_Squamous	LUSC	4.96831			2.31276				0.777738				0.777738	WT	WT	WT	WT	WT	WT	chr17_7577570-7577570_C>A	other non-conserving	p.M237I	WT	WT	WT	WT	WT	WT	WT	WT	WT	WT
ACH-000659	SCLC21H_LUNG			SIDM00029	lung	46.0	male	163.6472921	carcinoma	Caucasian	DSMZ	growing in suspention in mall or very big clusters(sheets)- cells are not adherent	90% Dulbecco's MEM (4.5g/L glucose) + 10% h.i. FBS	nan	~ 2 days	nan	Lung:SCLC	SCLC	3.96171			1.98612				0.438075				0.438075	WT	WT	WT	WT	WT	WT	chr17_7577105-7577105_G>C	other non-conserving	p.P278R	WT	WT	WT	WT	WT	WT	WT	WT	WT	WT
ACH-002352	LB1047EBV_MATCHED_NORMAL_TISSUE	LB1047EBV_Matched_Normal_Tissue		nan	non_cancerous																0.109757			-3.18762	-3.18762			-0.0293077	0.639681	0.639681	WT	WT	WT	WT	WT	WT	WT	WT	WT	WT	WT	WT	WT	WT	WT	WT	WT	WT	WT
ACH-000750	LOXIMVI_SKIN	LOXIMVI_SKIN	905974	SIDM00149	skin	58.0	male	159.042239	malignant_melanoma	Caucasian	NCI/DCTD	nan	RPMI-1640+10% FBS	5% DMSO	nan	29.3	Skin:Melanoma	SKCM	55.8637		2.2674	5.80384		1.18104	-0.206327	4.4081		3.72933	3.82946	4.11878	WT	WT	WT	WT	WT	WT	WT	WT	WT	WT	WT	WT	WT	WT	WT	chr7_140453136-140453136_A>T,chr7_140507849-140507849_T>C	other non-conserving,other non-conserving	p.V600E,p.I208V	WT
ACH-001623	ONDA8_CENTRAL_NERVOUS_SYSTEM			nan	central_nervous_system																										WT	WT	WT	WT	WT	WT	chr17_7578235-7578235_T>C	other non-conserving	p.Y205C	WT	WT	WT	WT	WT	WT	WT	WT	WT	WT
ACH-000780	NCIH1105_LUNG	NCIH1105_LUNG	908468	SIDM00652	lung	73.0	male	168.87520609999999	carcinoma	Caucasian	ATCC	Suspension	RPMI-1640 + 5% FBS	5%DMSO	nan	261.8	Lung:SCLC	SCLC	2.1766		0.176694	1.12208		-2.50068	-3.88804	-0.460442		0.561712	-0.109727	-0.285085	WT	WT	WT	WT	WT	WT	chr17_7577534-7577534_C>A	other non-conserving	p.R249S	WT	WT	WT	WT	WT	WT	WT	WT	WT	WT
ACH-002130	NCIH2795_PLEURA	NCIH2795_PLEURA	1290813	SIDM00154	lung	nan	nan	nan	nan	nan	nan	nan	nan	nan	nan	nan	nan	MESO			0.10054			-3.31416	-4.70152			-0.138181	-0.9801	-0.9801	WT	WT	WT	WT	WT	WT	WT	WT	WT	WT	WT	WT	WT	WT	WT	WT	WT	WT	WT
ACH-000298	NCIH2029_LUNG	NCIH2029_LUNG	688011	SIDM00735	lung	69.0	female	89.90036362	carcinoma	Caucasian	ATCC	nan	DMEM:HAM's F12 1:1 + 5% FBS	5%DMSO	nan	171.6	Lung:SCLC	SCLC	3.32552		0.15721	1.73358		-2.66924	-4.0566	0.175459		0.416689	-0.290075	-0.0573081	WT	WT	WT	WT	WT	WT	chr17_7578191-7578191_A>C	other non-conserving	p.Y220D	WT	WT	WT	WT	WT	WT	WT	WT	WT	WT
ACH-000629	IOMMLEE_CENTRAL_NERVOUS_SYSTEM			nan	central_nervous_system	nan	nan	166.47675980000002	meningioma	Asian	nan	nan	nan	nan	nan	nan	nan	nan													WT	WT	WT	WT	WT	WT	WT	WT	WT	WT	WT	WT	WT	WT	WT	chr7_140453136-140453136_A>T	other non-conserving	p.V600E	WT
ACH-001489	CORL32_LUNG	CORL32_LUNG	1322212	SIDM00508	lung	nan	nan	nan	nan	nan	nan	nan	nan	nan	nan	nan	nan	SCLC			0.0723472			-3.78892	-3.78892			-0.546649	-0.00367337	-0.00367337	WT	WT	WT	WT	WT	WT	chr17_7579312-7579312_C>A	damaging	p.T125T	WT	WT	WT	WT	WT	WT	WT	WT	WT	WT
ACH-002016	MEL290_UVEA			nan	eye																										WT	WT	WT	WT	WT	WT	WT	WT	WT	WT	WT	WT	WT	WT	WT	WT	WT	WT	WT
ACH-000517	SNU410_PANCREAS			nan	pancreas	53.0	male	171.53008540000002	carcinoma	Asian	KCLB	epithelial; monolayer	RPMI 1640 with L-glutamine (300mg/L), 90%; heat inactivated fetal bovine serum (FBS),10%	nan	72 hrs	nan	Pancreas:Carcinoma	PAAD		0.0187737			-5.73514				-1.05273				WT	WT	WT	WT	WT	WT	chr17_7578550-7578550_G>A	other non-conserving	p.S127F	WT	WT	WT	WT	WT	WT	chr7_140624440-140624440_C>T	other non-conserving	p.D22N	WT
ACH-000188	SCC25_UPPER_AERODIGESTIVE_TRACT	SCC25_UPPER_AERODIGESTIVE_TRACT	910701	SIDM01082	upper_aerodigestive	70.0	male	99.74078602	carcinoma	Caucasian	NIBRI	nan	nan	nan	nan	nan	Upper_Aerodigestive_Tract:Carcinoma	HNSC	0.976084		0.0312233	-0.034923		-5.00123	-5.00123	-1.6636		-1.58968	-1.30077	-1.48218	WT	WT	WT	chr6_33287309-33287309_G>C	silent	p.P596P	chr17_7578222-7578223_TC>-	damaging	p.R209fs	WT	WT	WT	WT	WT	WT	WT	WT	WT	WT
ACH-001490	CORL321_LUNG	CORL321_PLEURA	1322213	SIDM00507	lung	nan	nan	nan	nan	nan	nan	nan	nan	nan	nan	nan	nan	UNABLE TO CLASSIFY			0.121067			-3.04612	-3.04612			0.0924278	0.791069	0.791069	WT	WT	WT	WT	WT	WT	chr17_7578406-7578406_C>T,chr17_7578419-7578419_C>A	other non-conserving,damaging	p.R175H,p.E171*	WT	WT	WT	WT	WT	WT	WT	WT	WT	WT
ACH-000168	NOMO1_HAEMATOPOIETIC_AND_LYMPHOID_TISSUE	NOMO1_HAEMATOPOIETIC_AND_LYMPHOID_TISSUE	908451	SIDM00580	blood	31.0	female	120.11513889999999	haematopoietic_neoplasm	Asian	HSRRB	nan	nan	nan	nan	66.5	Leukemia:AML	LAML			0.0603087			-4.05149	-4.05149			-0.772556	-0.284607	-0.284607	WT	WT	WT	WT	WT	WT	chr17_7577558-7577558_G>-	damaging	p.S241fs	WT	WT	WT	WT	WT	WT	WT	WT	WT	WT
ACH-000402	BL70_HAEMATOPOIETIC_AND_LYMPHOID_TISSUE			SIDM00074	lymphocyte	16.0	male	116.67687140000001	lymphoid_neoplasm	Caucasian	NIBRI	nan	nan	nan	nan	nan	Lymphoma:NH_B_cell	DLBC		0.0264874			-5.23855				-0.0304603				WT	WT	WT	WT	WT	WT	chr17_7577121-7577121_G>A	other non-conserving	p.R273C	WT	WT	WT	WT	WT	WT	WT	WT	WT	WT
ACH-000470	SW1463_LARGE_INTESTINE	SW1463_LARGE_INTESTINE	909748	SIDM00834	colorectal	66.0	female	90.61710247	carcinoma	Caucasian	ATCC	ADHERENT EPITHELIAL;	RPMI-1640+10% FBS	5%DMSO	nan	70.3	Colorectal:Carcinoma	COAD/READ			0.211996			-2.23789	-3.62526			0.787803	0.171434	0.171434	chrX_76813017-76813017_T>A	other non-conserving	p.N2202Y	WT	WT	WT	chr17_7577538-7577538_C>T	other non-conserving	nan	WT	WT	WT	WT	WT	WT	WT	WT	WT	WT
ACH-000928	JHUEM1_ENDOMETRIUM			nan	uterus	56.0	female	434.98975700000005	carcinoma	Asian	RIKEN	adherent with some suspension cells	DMEM:F12(1:1) +15%FBS	5% DMSO	nan	288.6	Endometrium:Carcinoma	UCEC	2.8789			1.52552				-0.0409061				-0.0409061	WT	WT	WT	chr6_33289140-33289140_A>G	other non-conserving	p.S138P	WT	WT	WT	WT	WT	WT	WT	WT	WT	WT	WT	WT	chr17_8138410-8138410_T>C
ACH-000165	HS751T_FIBROBLAST			nan	fibroblast	nan	nan	nan	lymphoid_neoplasm	Caucasian	GNF	nan	nan	nan	nan	nan	nan	nan		0.0967581			-3.36947				3.81717				WT	WT	WT	WT	WT	WT	WT	WT	WT	WT	WT	WT	WT	WT	WT	WT	WT	WT	WT
ACH-001230	UT7_HAEMATOPOIETIC_AND_LYMPHOID_TISSUE			nan	blood	64.0	male	nan	haematopoietic_neoplasm	Asian	nan	nan	nan	nan	nan	nan	nan	LAML													WT	WT	WT	WT	WT	WT	chr17_7577017-7577017_A>C	damaging	nan	WT	WT	WT	WT	WT	WT	WT	WT	WT	WT
ACH-000918	MOLT16_HAEMATOPOIETIC_AND_LYMPHOID_TISSUE	MOLT16_HAEMATOPOIETIC_AND_LYMPHOID_TISSUE	908147	SIDM00431	blood	5.0	female	346.90442010000004	lymphoid_neoplasm	African_american	DSMZ	round to elongated single cells growing in suspention	80-90% RPMI 1640 +10-20% h. i. FBS	nan	~ 30 hrs	nan	Leukemia:ALL	ALL			0.0839181			-3.57487	-3.57487			-0.362492	0.22534	0.22534	WT	WT	WT	WT	WT	WT	chr17_7578457-7578457_C>T	other non-conserving	p.R158H	WT	WT	WT	WT	WT	WT	WT	WT	WT	WT
ACH-000428	UO31_KIDNEY	UO31_KIDNEY	905981	SIDM00112	kidney	nan	male	98.6867442	carcinoma	Caucasian	Garraway Lab	Adherent	RPMI-1640+ 5% FBS	5% DMSO	nan	27.8	Kidney:Carcinoma	KIRC			0.0235248			-5.40967	-5.40967			-1.94109	-1.73777	-1.73777	WT	WT	WT	WT	WT	WT	WT	WT	WT	WT	WT	WT	WT	WT	WT	WT	WT	WT	WT
ACH-002357	LB771PBL_MATCHED_NORMAL_TISSUE	LB771PBL_Matched_Normal_Tissue		nan	non_cancerous																0.125695			-2.992	-2.992			0.138992	0.848975	0.848975	WT	WT	WT	WT	WT	WT	WT	WT	WT	WT	WT	WT	WT	WT	WT	WT	WT	WT	WT
ACH-000067	HS683_CENTRAL_NERVOUS_SYSTEM	HS683_CENTRAL_NERVOUS_SYSTEM	1240150	SIDM00666	central_nervous_system	76.0	male	85.7317995	glioma	Caucasian	NIBRI	nan	nan	nan	nan	nan	CNS:Glioma	LGG			0.122817			-3.02542	-4.41278			0.110241	-0.671167	-0.671167	WT	WT	WT	WT	WT	WT	chr17_7577538-7577538_C>T	other non-conserving	nan	WT	WT	WT	WT	WT	WT	WT	WT	WT	WT
ACH-000010	NCIH2077_LUNG			nan	lung	nan	nan	nan	nan	nan	nan	nan	nan	nan	nan	nan	nan	nan													WT	WT	WT	WT	WT	WT	chr17_7578500-7578500_G>A	damaging	p.Q144*	WT	WT	WT	WT	WT	WT	WT	WT	WT	WT
ACH-000156	MHHCALL4_HAEMATOPOIETIC_AND_LYMPHOID_TISSUE	MHHCALL4_HAEMATOPOIETIC_AND_LYMPHOID_TISSUE	908133	SIDM00376	blood	10.0	male	82.3890816	lymphoid_neoplasm	Caucasian	DSMZ	single, round cells growing in suspention, partly in clusters	80% RPMI 1640 + 20% h. i. FBS	nan	~ 80-100 hrs	nan	Leukemia:ALL	ALL		0.0242178	0.0741231		-5.36779	-3.75393	-3.75393		-0.296507	-0.516548	0.0337593	0.0337593	WT	WT	WT	WT	WT	WT	WT	WT	WT	WT	WT	WT	WT	WT	WT	WT	WT	WT	WT
ACH-000358	NCIH69_LUNG	NCIH69_LUNG	688027	SIDM01121	lung	55.0	male	101.4376589	carcinoma	Caucasian	ATCC	floating aggregates	RPMI 1640 + 10% FBS	5% DMSO	nan	98.3	Lung:SCLC	SCLC	14.6057		0.610717	3.86846		-0.711424	-2.09879	2.3955		2.10112	1.80465	2.10008	WT	WT	WT	WT	WT	WT	chr17_7578419-7578419_C>A	damaging	p.E171*	WT	WT	WT	WT	WT	WT	WT	WT	WT	WT
ACH-000366	SKNDZ_AUTONOMIC_GANGLIA	SKNDZ_AUTONOMIC_GANGLIA	688086	SIDM01100	peripheral_nervous_system	2.0	female	105.5585115	neuroblastoma	Caucasian	NIBRI	nan	nan	nan	nan	nan	PNET:Neuroblastoma	NB			0.1554			-2.68594	-4.07331			0.402315	-0.30795	-0.30795	WT	WT	WT	WT	WT	WT	chr17_7579358-7579358_C>A	other non-conserving	p.R110L	WT	WT	WT	WT	WT	WT	WT	WT	WT	WT
ACH-000427	NCIN87_STOMACH	NCIN87_STOMACH	908461	SIDM01147	gastric	nan	male	111.33928059999998	carcinoma	African_american	nan	Epithelial adherent	RPMI1640+10%FBS	5%DMSO	nan	76.7	Gastric:Carcinoma	STAD	1.85015		0.133625	0.887646		-2.90374	-4.2911	-0.704226		0.21493	-0.540978	-0.622602	WT	WT	WT	WT	WT	WT	chr17_7577538-7577538_C>T	other non-conserving	nan	WT	WT	WT	WT	WT	WT	WT	WT	WT	WT
ACH-000132	JHOS2_OVARY	JHOS2_OVARY	1479995	SIDM00305	ovary	45.0	female	121.58275590000001	carcinoma	Asian	RIKEN	nan	DMEM:F12 + 10% FBS	5% DMSO	nan	133.4	Ovary:Carcinoma	OV	2.03219	0.0206229	0.0438105	1.02303	-5.59961	-4.51258	-4.51258	-0.563437	-0.773733	-1.16926	-0.777941	-0.670689	WT	WT	WT	WT	WT	WT	chr17_7577495-7577514_TGACCTGGAGTCTTCCAGTG>-	damaging	p.TLEDSR256fs	WT	WT	WT	WT	WT	WT	WT	WT	WT	WT
ACH-000946	HEC265_ENDOMETRIUM			nan	uterus	nan	female	550.0652135	carcinoma	Asian	HSSRB	epithelial-like	Eagle's minimal essential medium with 15% fetal bovine serum	nan	nan	nan	Endometrium:Carcinoma	UCEC		0.0273764			-5.19092				0.0675835				WT	WT	WT	chr6_33289244-33289244_G>A	other non-conserving	p.A103V	WT	WT	WT	WT	WT	WT	WT	WT	WT	chr7_140482927-140482927_G>-	damaging	p.P403fs	WT
ACH-001795	94T778_SOFT_TISSUE			nan	soft_tissue	nan	nan	nan	nan	nan	nan	nan	nan	nan	nan	nan	nan	nan													WT	WT	WT	WT	WT	WT	WT	WT	WT	WT	WT	WT	WT	WT	WT	WT	WT	WT	WT
ACH-001331	BICR10_UPPER_AERODIGESTIVE_TRACT	BICR10_UPPER_AERODIGESTIVE_TRACT	1290724	SIDM00077	upper_aerodigestive	nan	nan	nan	nan	nan	nan	nan	nan	nan	nan	nan	nan	HNSC			0.0518315			-4.27003	-4.27003			-0.960578	-0.518427	-0.518427	WT	WT	WT	WT	WT	WT	WT	WT	WT	WT	WT	WT	WT	WT	WT	WT	WT	WT	WT
ACH-001417	UMC11_LUNG	UMC11_LUNG	909779	SIDM01183	lung	nan	nan	nan	nan	nan	nan	nan	nan	nan	nan	nan	nan	nan			0.165353			-2.59638	-3.98375			0.479372	-0.212124	-0.212124	WT	WT	WT	WT	WT	WT	chr17_7577600-7577600_A>-	damaging	p.S227fs	WT	WT	WT	WT	WT	WT	WT	WT	WT	WT
ACH-000660	SUDHL5_HAEMATOPOIETIC_AND_LYMPHOID_TISSUE	SUDHL5_HAEMATOPOIETIC_AND_LYMPHOID_TISSUE	1331036	SIDM00406	lymphocyte	17.0	female	126.24735009999999	lymphoid_neoplasm	Caucasian	DSMZ	Supsension	RPMI +10%FBS	5% DMSO	nan	nan	Lymphoma:NH_B_cell	DLBC		0.0471342	0.587516		-4.40708	-0.7673	-0.7673		1.68118	2.05305	3.22926	3.22926	WT	WT	WT	WT	WT	WT	WT	WT	WT	WT	WT	WT	WT	WT	WT	WT	WT	WT	WT
ACH-000723	YD10B_UPPER_AERODIGESTIVE_TRACT			nan	upper_aerodigestive	67.0	male	175.5844253	carcinoma	Asian	KCLB	epithelial; monolayer	RPMI 1640 with L-glutamine (300mg/L), 90%; heat inactivated fetal bovine serum (FBS),10%	nan	25.3 hrs	nan	Upper_Aerodigestive_Tract:Carcinoma	HNSC		0.0280715			-5.15475				0.14204				WT	WT	WT	WT	WT	WT	chr17_7577573-7577573_G>T	damaging	p.Y236*	WT	WT	WT	WT	WT	WT	WT	WT	WT	WT
ACH-000323	42MGBA_CENTRAL_NERVOUS_SYSTEM	42MGBA_CENTRAL_NERVOUS_SYSTEM	687561	SIDM00982	central_nervous_system	63.0	male	107.05087990000001	glioma	Caucasian	DSMZ	Adherent	RPMI:EMEM (1:1) +20 % FBS	5%DMSO	nan	82.6	CNS:Glioma_HighGrade	GBM			0.737322			-0.439633	-1.827			2.33496	2.09545	2.09545	WT	WT	WT	chr6_33286824-33286824_G>A	other non-conserving	p.R705W	chr17_7577093-7577093_C>T,chr17_7578217-7578217_G>A	other non-conserving,other non-conserving	p.R282Q,p.T211I	WT	WT	WT	WT	WT	WT	WT	WT	WT	WT
ACH-000929	NCIH2110_LUNG	NCIH2110_LUNG	1298351	SIDM00703	lung	nan	nan	405.948948	carcinoma	African_american	GNF	nan	nan	nan	nan	nan	Lung:NSCLC_Others	UNABLE TO CLASSIFY			0.0341799			-4.87071	-4.87071			-1.47738	-1.16111	-1.16111	WT	WT	WT	chr6_33288161-33288161_C>A	other non-conserving	p.G416V	chr17_7578457-7578457_C>G	other non-conserving	p.R158P	WT	WT	WT	WT	WT	WT	WT	WT	WT	WT
ACH-000917	TE4_OESOPHAGUS	TE4_OESOPHAGUS	1503371	SIDM00250	esophagus	nan	nan	398.1513421	carcinoma	Asian	RIKEN	epithelial-like	RPMI 1640 +10%FBS	nan	nan	nan	Oesophagus:Carcinoma	ESCA			0.0367224			-4.7672	-4.7672			-1.38833	-1.05036	-1.05036	WT	WT	WT	WT	WT	WT	chr17_7577548-7577548_C>A	other non-conserving	p.G245C	WT	WT	WT	WT	WT	WT	WT	WT	WT	WT
ACH-000565	RCM1_LARGE_INTESTINE	RCM1_LARGE_INTESTINE	909263	SIDM00359	colorectal	73.0	female	132.1193181	carcinoma	Asian	HSSRB	ADHERENT	RPMI:F12 1:1+10% FBS	5% DMSO	70hrs	68.5	Colorectal:Carcinoma	COAD/READ			0.121511			-3.04084	-4.42821			0.0969717	-0.687669	-0.687669	WT	WT	WT	WT	WT	WT	chr17_7577022-7577022_G>A	damaging	p.R306*	WT	WT	WT	WT	WT	WT	WT	WT	WT	WT
ACH-000261	RERFLCAI_LUNG			SIDM00307	lung	nan	nan	124.67553190000001	carcinoma	Asian	RIKEN	EPITHELIAL-LIKE ADHERENT CELLS	MEM+10%FBS	5%DMSO	nan	51.3	Lung:NSCLC_Squamous	LUSC													WT	WT	WT	WT	WT	WT	chr17_7579377-7579377_G>A	damaging	p.Q104*	WT	WT	WT	WT	WT	WT	WT	WT	WT	WT
ACH-000182	SNU869_BILIARY_TRACT			SIDM00159	bile_duct	nan	nan	113.35185530000001	carcinoma	Asian	nan	Epithelial adherent	RPMI-10% FBS	5% DMSO	nan	81.8	Biliary_Tract:Carcinoma	nan		0.0533444			-4.22852				2.04876				WT	WT	WT	WT	WT	WT	WT	WT	WT	WT	WT	WT	WT	WT	WT	WT	WT	WT	WT
ACH-001024	CHL1_SKIN	CHL1_SKIN	910853	SIDM01228	skin	nan	nan	nan	malignant_melanoma	Caucasian	ATCC	Epithelial Adherent	RPMI1640+15%FBS	5%DMSO	nan	48.7	nan	SKCM			0.249995			-2.00003	-3.3874			0.992451	0.42593	0.42593	WT	WT	WT	WT	WT	WT	chr17_7578271-7578271_T>C	other non-conserving	p.H193R	WT	WT	WT	WT	WT	WT	WT	WT	WT	WT
ACH-000309	SKLU1_LUNG	SKLU1_LUNG	909721	SIDM01108	lung	60.0	female	72.9598821	carcinoma	Caucasian	ATCC	Adherent	MEM+10%FBS	5% DMSO	nan	174.6	Lung:NSCLC_Adeno	LUAD	16.1001		0.760906	4.009		-0.39421	-1.78158	2.54165		2.37404	2.14405	2.34285	WT	WT	WT	WT	WT	WT	chr17_7578271-7578271_T>C	other non-conserving	p.H193R	WT	WT	WT	WT	WT	WT	WT	WT	WT	WT
ACH-000071	HS706T_BONE			nan	fibroblast	16.0	female	83.60584105	giant_cell_tumour	Caucasian	GNF	nan	nan	nan	nan	nan	nan	nan													WT	WT	WT	WT	WT	WT	WT	WT	WT	WT	WT	WT	WT	WT	WT	WT	WT	WT	WT
ACH-001838	ICC12_BILIARY_TRACT			nan	bile_duct																										WT	WT	WT	WT	WT	WT	chr17_7578280-7578280_G>A	other non-conserving	p.P190L	WT	WT	WT	WT	WT	WT	chr7_140453136-140453136_A>T	other non-conserving	p.V600E	WT
ACH-000642	HMEL_BREAST			nan	engineered_breast	nan	nan	136.53116269999998	other	African_american	nan	nan	nan	nan	nan	nan	nan	BRCA													WT	WT	WT	WT	WT	WT	WT	WT	WT	WT	WT	WT	WT	WT	WT	WT	WT	WT	WT
ACH-000954	HEC1A_ENDOMETRIUM			SIDM00595	uterus	71.0	female	941.9709071000001	carcinoma	Asian	NIBRI	nan	nan	nan	nan	nan	Endometrium:Carcinoma	UCEC	2.7858			1.47809				-0.0902245				-0.0902245	chrX_76938169-76938169_A>G	other non-conserving	p.M860T	chr6_33289693-33289693_C>T	other non-conserving	p.A4T	chr17_7577538-7577538_C>T	other non-conserving	nan	WT	WT	WT	WT	WT	WT	chr7_140439694-140439694_C>T	other non-conserving	p.R682Q	WT
ACH-002108	ES7_BONE	ES7_BONE	684059	SIDM00269	bone	nan	nan	nan	nan	nan	nan	nan	nan	nan	nan	nan	nan	nan			0.0999794			-3.32223	-4.70959			-0.145122	-0.988731	-0.988731	WT	WT	WT	WT	WT	WT	chr17_7578393-7578393_A>C	other non-conserving	p.H179Q	WT	WT	WT	WT	WT	WT	WT	WT	WT	WT
ACH-001151	OVCAR5_OVARY	OVCAR5_OVARY	905969	SIDM00091	ovary	nan	female	nan	carcinoma	nan	Garraway Lab	Adherent	RPMI-1640+ 5% FBS	5% DMSO	nan	28.8	Ovary:Carcinoma	OV			0.134478			-2.89456	-4.28192			0.222829	-0.531156	-0.531156	WT	WT	WT	WT	WT	WT	WT	WT	WT	WT	WT	WT	WT	WT	WT	WT	WT	WT	WT
ACH-000027	GOS3_CENTRAL_NERVOUS_SYSTEM			nan	central_nervous_system	55.0	male	91.51669099	glioma	Caucasian	GNF	nan	nan	nan	nan	nan	CNS:Glioma	nan		0.0218563			-5.51581				-0.601217				WT	WT	WT	WT	WT	WT	WT	WT	WT	WT	WT	WT	WT	WT	WT	WT	WT	WT	WT
ACH-002272	MHHPREB1_HAEMATOPOIETIC_AND_LYMPHOID_TISSUE	MHHPREB1_HAEMATOPOIETIC_AND_LYMPHOID_TISSUE	908136	SIDM00388	lymphoma	nan	nan	nan	nan	nan	nan	nan	nan	nan	nan	nan	nan	nan			0.0967132			-3.37014	-3.37014			-0.186349	0.444388	0.444388	WT	WT	WT	chr6_33288840-33288840_G>A	damaging	p.R238*	chr17_7578211-7578211_C>T	other non-conserving	p.R213Q	WT	WT	WT	WT	WT	WT	WT	WT	WT	WT
ACH-002193	RERFLCFM_LUNG	RERFLCFM_LUNG	930081	SIDM00357	lung	nan	nan	nan	nan	nan	nan	nan	nan	nan	nan	nan	nan	SCLC			0.116817			-3.09768	-4.48504			0.0480713	-0.74848	-0.74848	WT	WT	WT	WT	WT	WT	chr17_7578406-7578406_C>T	other non-conserving	p.R175H	WT	WT	WT	WT	WT	WT	WT	WT	WT	WT
ACH-001738	CCRFCEM_HAEMATOPOIETIC_AND_LYMPHOID_TISSUE	CCRFCEM_HAEMATOPOIETIC_AND_LYMPHOID_TISSUE	905952	SIDM00121	blood	nan	nan	nan	nan	nan	nan	nan	nan	nan	nan	nan	nan	ALL			0.0987836			-3.33958	-3.33958			-0.160057	0.477084	0.477084	WT	WT	WT	WT	WT	WT	chr17_7577538-7577538_C>T,chr17_7578406-7578406_C>T	other non-conserving,other non-conserving	nan,p.R175H	WT	WT	WT	WT	WT	WT	WT	WT	WT	WT
ACH-002276	MYM12_HAEMATOPOIETIC_AND_LYMPHOID_TISSUE	MYM12_HAEMATOPOIETIC_AND_LYMPHOID_TISSUE	1330960	SIDM01217	leukemia	nan	nan	nan	nan	nan	nan	nan	nan	nan	nan	nan	nan	ALL			0.0616297			-4.02023	-4.02023			-0.745662	-0.251161	-0.251161	WT	WT	WT	WT	WT	WT	WT	WT	WT	WT	WT	WT	WT	WT	WT	WT	WT	WT	WT
ACH-000884	MDAMB435S_SKIN			SIDM01222	skin	31.0	female	237.862854	malignant_melanoma	Caucasian	ATCC	nan	RPMI-1640+10% FBS	5% DMSO	nan	42.0	Skin:Melanoma	SKCM													WT	WT	WT	WT	WT	WT	chr17_7577141-7577141_C>T	other non-conserving	p.G266E	WT	WT	WT	WT	WT	WT	chr7_140453136-140453136_A>T	other non-conserving	p.V600E	chr17_8133908-8133908_G>A
ACH-000588	KMS26_HAEMATOPOIETIC_AND_LYMPHOID_TISSUE			nan	plasma_cell	50.0	male	149.70170819999998	lymphoid_neoplasm	Asian	nan	suspension	RPMI1640+10%FBS	5%DMSO	nan	33.2	Lymphoma:Multiple_Myeloma	MM		0.0231154			-5.435				-0.434881				WT	WT	WT	WT	WT	WT	chr17_7578406-7578406_C>T	other non-conserving	p.R175H	WT	WT	WT	WT	WT	WT	chr7_140624440-140624440_C>T	other non-conserving	p.D22N	WT
ACH-000970	SNUC5_LARGE_INTESTINE	SNUC5_LARGE_INTESTINE	1674021	SIDM00498	colorectal	77.0	female	802.4440016	carcinoma	Asian	KCLB	epithelial; monolayer	RPMI 1640 with L-glutamine (300mg/L), 90%; heat inactivated fetal bovine serum (FBS),10%	nan	67 hrs	nan	Colorectal:Carcinoma	COAD/READ			0.0743928			-3.74869	-3.74869			-0.51204	0.0393655	0.0393655	chrX_76778823-76778823_A>G	silent	p.H2252H	WT	WT	WT	chr17_7577539-7577539_G>A,chr17_7578197-7578197_C>A	other non-conserving,other non-conserving	p.R248W,p.V218L	WT	WT	WT	WT	WT	WT	chr7_140453136-140453136_A>T	other non-conserving	p.V600E	WT
ACH-000385	SKRC20_KIDNEY			nan	kidney	nan	nan	94.25285833	carcinoma	Caucasian	nan	nan	nan	nan	nan	nan	nan	KIRC													WT	WT	WT	WT	WT	WT	WT	WT	WT	chr3_10183788-10183788_C>A	other non-conserving	p.P86H	WT	WT	WT	WT	WT	WT	WT
ACH-002313	TK_HAEMATOPOIETIC_AND_LYMPHOID_TISSUE	TK_HAEMATOPOIETIC_AND_LYMPHOID_TISSUE	1331045	SIDM00323	lymphoma	nan	nan	nan	nan	nan	nan	nan	nan	nan	nan	nan	nan	DLBC			0.177479			-2.49428	-2.49428			0.567214	1.3815	1.3815	WT	WT	WT	WT	WT	WT	chr17_7578392-7578392_C>A	damaging	p.E180*	WT	WT	WT	WT	WT	WT	WT	WT	WT	WT
ACH-001030	CHLA218_BONE			nan	bone																										WT	WT	WT	WT	WT	WT	WT	WT	WT	WT	WT	WT	WT	WT	WT	WT	WT	WT	WT
ACH-000289	SNU466_CENTRAL_NERVOUS_SYSTEM			nan	central_nervous_system	61.0	male	136.3793212	glioma	Asian	KCLB	spendle; monolayer	RPMI 1640 with L-glutamine (300mg/L), 90%; heat inactivated fetal bovine serum (FBs),10%	nan	54 hrs	nan	CNS:Glioma_HighGrade	GBM		0.0291555			-5.10009				0.254567				WT	WT	WT	WT	WT	WT	WT	WT	WT	WT	WT	WT	WT	WT	WT	WT	WT	WT	WT
ACH-001306	8305C_THYROID	8305C_THYROID	906795	SIDM00997	thyroid	67.0	female	200.9082363	carcinoma	Asian	DSMZ	Adherent large spindle-shaped cells growing in monolayer	RPMI1640+20%FBS	10%DMSO	54hrs	121.6	Thyroid:Carcinoma	THCA	2.14214		0.0416155	1.09906		-4.58674	-4.58674	-0.484382		-1.23306	-0.857283	-0.670832	WT	WT	WT	WT	WT	WT	chr17_7577121-7577121_G>A	other non-conserving	p.R273C	WT	WT	WT	WT	WT	WT	chr7_140453136-140453136_A>T	other non-conserving	p.V600E	WT
ACH-001827	184B5_BREAST			nan	engineered
ACH-001023	CGTHW1_THYROID	CGTHW1_THYROID	910568	SIDM01248	thyroid	70.0	female	nan	carcinoma	Caucasian	DSMZ	Adherent large epitheloid cells with long processes growing in monolayers with multilayer foci	RPMI1640+10%FBS	10%DMSO	20-25hrs	31.6	Thyroid:Carcinoma	THCA			0.389908			-1.35879	-2.74616			1.54415	1.11201	1.11201	WT	WT	WT	WT	WT	WT	chr17_7577517-7577517_A>C	other non-conserving	p.I255S	WT	WT	WT	WT	WT	WT	WT	WT	WT	WT
ACH-000898	SNU719_STOMACH			nan	gastric	53.0	male	343.1649394	carcinoma	Asian	KCLB	epithelial; monolayer	RPMI 1640 with L-glutamine (300mg/L), 90%; heat inactivated fetal bovine serum (FBS),10%	nan	nan	nan	Gastric:Carcinoma	STAD		0.0801466			-3.64121				3.25778				WT	WT	WT	WT	WT	WT	WT	WT	WT	WT	WT	WT	WT	WT	WT	WT	WT	WT	WT
ACH-000426	KMS20_HAEMATOPOIETIC_AND_LYMPHOID_TISSUE			nan	plasma_cell	65.0	female	130.7608683	lymphoid_neoplasm	Asian	nan	suspension	RPMI1640+10%FBS	5%DMSO	nan	130.0	Lymphoma:Multiple_Myeloma	MM		0.0171032			-5.86959				-1.32952				chrX_76931736-76931736_T>C,chrX_76939746-76939746_G>A	other non-conserving,silent	p.N1265S,p.S334S	WT	WT	WT	chr17_7578552-7578552_G>C	damaging	p.Y126*	WT	WT	WT	WT	WT	WT	WT	WT	WT	WT
ACH-000407	SNU685_ENDOMETRIUM			SIDM00165	uterus	70.0	female	133.0971004	carcinoma	Asian	KCLB	polypoid; monolayer	RPMI 1640 with L-glutamine (300mg/L), 90%; heat inactivated fetal bovine serum (FBS),10%	nan	20 hrs	nan	Endometrium:Others	UCEC		0.0354982			-4.81611				0.839158				WT	WT	WT	WT	WT	WT	chr17_7577018-7577018_C>A	damaging	nan	WT	WT	WT	WT	WT	WT	WT	WT	WT	WT
ACH-000229	HS822T_FIBROBLAST			nan	fibroblast	9.0	female	96.91151978	Ewings_sarcoma-peripheral_primitive_neuroectodermal_tumour	Caucasian	NIBRI	nan	nan	nan	nan	nan	nan	nan													WT	WT	WT	WT	WT	WT	WT	WT	WT	WT	WT	WT	WT	WT	WT	WT	WT	WT	WT
ACH-001454	C10_LARGE_INTESTINE			nan	colorectal																										WT	WT	WT	WT	WT	WT	WT	WT	WT	WT	WT	WT	WT	WT	WT	WT	WT	WT	WT
ACH-002251	JHU029_UPPER_AERODIGESTIVE_TRACT	JHU029_UPPER_AERODIGESTIVE_TRACT	1298156	SIDM00690	upper_aerodigestive	nan	nan	nan	nan	nan	nan	nan	nan	nan	nan	nan	nan	HNSC			0.0505374			-4.3065	-4.3065			-0.991962	-0.557455	-0.557455	WT	WT	WT	WT	WT	WT	chr17_7579364-7579364_C>-	damaging	p.G108fs	WT	WT	WT	WT	WT	WT	WT	WT	WT	WT
ACH-001388	SUM102PT_BREAST			nan	breast																										WT	WT	WT	WT	WT	WT	WT	WT	WT	WT	WT	WT	WT	WT	WT	WT	WT	WT	WT
ACH-001397	SUM225CWN_BREAST			nan	breast
ACH-002042	T3M5_THYROID			nan	thyroid																										WT	WT	WT	WT	WT	WT	chr17_7579364-7579364_C>A	other non-conserving	p.G108V	WT	WT	WT	WT	WT	WT	chr7_140453136-140453136_A>T	other non-conserving	p.V600E	WT
ACH-000707	P3HR1_HAEMATOPOIETIC_AND_LYMPHOID_TISSUE			SIDM01254	lymphocyte	7.0	male	166.45640590000002	lymphoid_neoplasm	African_american	NIBRI	nan	nan	nan	nan	nan	Lymphoma:NH_B_cell	DLBC		0.0439442			-4.50818				1.47305				WT	WT	WT	WT	WT	WT	chr17_7577079-7577079_C>A,chr17_7578443-7578443_A>G	damaging,other non-conserving	p.E287*,p.Y163H	WT	WT	WT	WT	WT	WT	WT	WT	WT	WT
ACH-001280	SCS214_SOFT_TISSUE			nan	soft_tissue																										WT	WT	WT	WT	WT	WT	chr17_7578505-7578505_G>C	other non-conserving	p.P142R	WT	WT	WT	WT	WT	WT	WT	WT	WT	WT
ACH-001031	CHLA266_SOFT_TISSUE			nan	soft_tissue																										WT	WT	WT	WT	WT	WT	WT	WT	WT	WT	WT	WT	WT	WT	WT	WT	WT	WT	WT
ACH-002165	MZ2MEL_SKIN	MZ2MEL_SKIN	971777	SIDM00179	skin	nan	nan	nan	nan	nan	nan	nan	nan	nan	nan	nan	nan	SKCM			0.536351			-0.898751	-0.898751			1.93995	3.08861	3.08861	WT	WT	WT	WT	WT	WT	WT	WT	WT	WT	WT	WT	WT	WT	WT	WT	WT	WT	WT
ACH-001431	TC205_BONE			nan	bone																										WT	WT	WT	WT	WT	WT	WT	WT	WT	WT	WT	WT	WT	WT	WT	WT	WT	WT	WT
ACH-000598	KMS21BM_HAEMATOPOIETIC_AND_LYMPHOID_TISSUE			nan	plasma_cell	62.0	male	160.2806444	lymphoid_neoplasm	Asian	HSSRB	lymphocyte-like	RPMI 1640 medium with 10% fetal bovine serum.	nan	nan	nan	Lymphoma:Multiple_Myeloma	MM		0.0137095			-6.18868				-1.98637				WT	WT	WT	WT	WT	WT	WT	WT	WT	WT	WT	WT	WT	WT	WT	WT	WT	WT	WT
ACH-001555	MERO14_PLEURA			nan	lung																										WT	WT	WT	WT	WT	WT	WT	WT	WT	WT	WT	WT	WT	WT	WT	WT	WT	WT	WT
ACH-000164	PANC1_PANCREAS			SIDM00610	pancreas	56.0	male	90.99857815	carcinoma	Caucasian	NIBRI	nan	nan	nan	nan	35.8	Pancreas:Carcinoma	PAAD	2.69131			1.42831				-0.141994				-0.141994	WT	WT	WT	WT	WT	WT	chr17_7577120-7577120_C>T	other non-conserving	p.R273H	WT	WT	WT	WT	WT	WT	WT	WT	WT	WT
ACH-000852	NCIH1435_LUNG	NCIH1435_LUNG	1298347	SIDM00658	lung	35.0	female	227.30397620000002	carcinoma	Caucasian	ATCC	Adherent, single cells loosely attached	RPMI 1640+10%FBS	5%DMSO	nan	81.4	Lung:NSCLC_Adeno	LUAD	4.14741		0.072205	2.05221		-3.79176	-3.79176	0.506799		-0.549091	-0.00671031	0.250044	WT	WT	WT	WT	WT	WT	chr17_7578507-7578507_G>C	other non-conserving	p.C141W	WT	WT	WT	WT	WT	WT	WT	WT	WT	WT
ACH-000079	TE125T_FIBROBLAST			nan	fibroblast	1.0	female	53.55550329	rhabdomyosarcoma	Caucasian	ATCC	Fibroblast Adherent	EMEM+10%FBS	5%DMSo	nan	265.0	Soft_Tissue:Sarcoma_Rhabdoid	SARC		0.0274154			-5.18887				0.0718042				WT	WT	WT	WT	WT	WT	chr17_7577067-7577067_T>C	other non-conserving	p.K291E	WT	WT	WT	WT	WT	WT	WT	WT	WT	WT
ACH-000833	RH30_SOFT_TISSUE			nan	soft_tissue	17.0	male	195.104647	rhabdomyosarcoma	Caucasian	DSMZ	adherent epithelial-like cells growing as monolayer	90-95% RPMI 1640 +5-10 h.i. FBS	nan	~ 35 hrs	nan	Soft_Tissue:Sarcoma_Rhabdoid	SARC													WT	WT	WT	WT	WT	WT	chr17_7577098-7577098_T>A,chr17_7577121-7577121_G>A,chr17_7578235-7578235_T>C	other non-conserving,other non-conserving,other non-conserving	p.R280S,p.R273C,p.Y205C	WT	WT	WT	WT	WT	WT	WT	WT	WT	WT
ACH-002166	MZ7MEL_SKIN	MZ7MEL_SKIN	753596	SIDM00516	skin	nan	nan	nan	nan	nan	nan	nan	nan	nan	nan	nan	nan	SKCM			0.516571			-0.952961	-2.34033			1.89331	1.54622	1.54622	chrX_76778826-76778826_G>A	silent	p.Y2251Y	WT	WT	WT	WT	WT	WT	WT	WT	WT	WT	WT	WT	chr7_140453136-140453136_A>T	other non-conserving	p.V600E	chr17_8132138-8132138_C>T
ACH-002184	PC3JPC3_LUNG	PC3JPC3_LUNG	1240202	SIDM00361	lung	nan	nan	nan	nan	nan	nan	nan	nan	nan	nan	nan	nan	LUAD			0.115484			-3.11424	-4.5016			0.033826	-0.766195	-0.766195	WT	WT	WT	WT	WT	WT	chr17_7578516-7578516_G>-	damaging	p.A138fs	WT	WT	WT	WT	WT	WT	WT	WT	WT	WT
ACH-001574	MOLM14_HAEMATOPOIETIC_AND_LYMPHOID_TISSUE			SIDM00436	blood																										WT	WT	WT	WT	WT	WT	WT	WT	WT	WT	WT	WT	WT	WT	WT	WT	WT	WT	WT
ACH-000938	NALM6_HAEMATOPOIETIC_AND_LYMPHOID_TISSUE	NALM6_HAEMATOPOIETIC_AND_LYMPHOID_TISSUE	908158	SIDM00429	blood	19.0	male	470.0581531	lymphoid_neoplasm	Caucasian	DSMZ	single, small, round cells in suspention	90% RPMI 1640 +10% h. i. FBS	nan	~ 36 hrs	nan	Leukemia:ALL	ALL			0.0835816			-3.58067	-3.58067			-0.367479	0.219138	0.219138	WT	WT	WT	WT	WT	WT	WT	WT	WT	WT	WT	WT	WT	WT	WT	WT	WT	WT	WT
ACH-000353	TE15_OESOPHAGUS	TE15_OESOPHAGUS	753614	SIDM00249	esophagus	nan	female	131.4062314	carcinoma	Asian	GNF	nan	nan	nan	nan	nan	Oesophagus:Carcinoma	ESCA			0.159261			-2.65054	-4.0379			0.432778	-0.270068	-0.270068	WT	WT	WT	WT	WT	WT	chr17_7574003-7574003_G>A,chr17_7578290-7578290_C>T	damaging,damaging	p.R342*,nan	WT	WT	WT	WT	WT	WT	WT	WT	WT	WT
ACH-000180	HS839T_FIBROBLAST			nan	fibroblast	42.0	female	88.09491949	malignant_melanoma	Caucasian	ATCC	Adherent	DMEM +10 %FBS	5%DMSO	nan	96.9	Skin:Melanoma	SKCM		0.03182			-4.97392				0.514295				WT	WT	WT	WT	WT	WT	chr17_7577106-7577106_G>A	other non-conserving	p.P278S	WT	WT	WT	WT	WT	WT	WT	WT	WT	WT
ACH-000872	HCC515_LUNG			nan	lung	nan	nan	nan	nan	nan	nan	nan	nan	nan	nan	nan	nan	nan													WT	WT	WT	WT	WT	WT	chr17_7578269-7578269_G>A	other non-conserving	p.L194F	WT	WT	WT	WT	WT	WT	WT	WT	WT	WT
ACH-002217	BE2M17_AUTONOMIC_GANGLIA	BE2M17_AUTONOMIC_GANGLIA	753616	SIDM01229	peripheral_nervous_system	nan	nan	nan	nan	nan	nan	nan	nan	nan	nan	nan	nan	NB			0.0985418			-3.34312	-3.34312			-0.163099	0.473301	0.473301	chrX_76938483-76938483_A>C	other non-conserving	p.N755K	WT	WT	WT	chr17_7578526-7578526_C>A	other non-conserving	p.C135F	WT	WT	WT	WT	WT	WT	WT	WT	WT	WT
ACH-000346	JVM3_HAEMATOPOIETIC_AND_LYMPHOID_TISSUE	JVM3_HAEMATOPOIETIC_AND_LYMPHOID_TISSUE	907270	SIDM01012	blood	73.0	male	108.03629740000001	lymphoid_neoplasm	Caucasian	DSMZ	lymphoblastoid cells growing in clumps in suspention	90% RPMI 1640 + 10% h. i. FBS	nan	~ 30 hrs	nan	Leukemia:CLL	CLL			0.152149			-2.71644	-2.71644			0.376073	1.1438	1.1438	WT	WT	WT	WT	WT	WT	WT	WT	WT	WT	WT	WT	WT	WT	WT	chr7_140453132-140453132_T>A	other non-conserving	p.K601N	WT
ACH-000312	SKNBE2_AUTONOMIC_GANGLIA			SIDM00894	peripheral_nervous_system	2.166666667	male	108.81966489999999	neuroblastoma	Caucasian	GNF	nan	nan	nan	30 hrs	nan	PNET:Neuroblastoma	NB													chrX_76938483-76938483_A>C	other non-conserving	p.N755K	WT	WT	WT	chr17_7578526-7578526_C>A	other non-conserving	p.C135F	WT	WT	WT	WT	WT	WT	WT	WT	WT	WT
ACH-002160	MCIXC_BONE	MCIXC_AUTONOMIC_GANGLIA	908118	SIDM01246	bone	nan	nan	nan	nan	nan	nan	nan	nan	nan	nan	nan	nan	NB			0.55768			-0.842491	-2.22986			1.98836	1.66442	1.66442	WT	WT	WT	WT	WT	WT	WT	WT	WT	WT	WT	WT	WT	WT	WT	WT	WT	WT	WT
ACH-001407	UMUC13_URINARY_TRACT			nan	urinary_tract																										WT	WT	WT	WT	WT	WT	chr17_7577559-7577559_G>A,chr17_7579592-7579592_T>C	other non-conserving,damaging	p.S241F,nan	WT	WT	WT	WT	WT	WT	WT	WT	WT	WT
ACH-000943	RKO_LARGE_INTESTINE	RKO_LARGE_INTESTINE	909698	SIDM01090	colorectal	nan	nan	495.07907029999996	carcinoma	African_american	ATCC	adherent epithelial	EMEM+ 10% FBS	5% DMSO	nan	25.6	Colorectal:Carcinoma	COAD/READ	2.8192		0.193064	1.49529		-2.37285	-3.76022	-0.0723444		0.671689	0.0270379	-0.0226533	chrX_76763988-76763988_C>T	silent	p.K2440K	WT	WT	WT	WT	WT	WT	WT	WT	WT	chr2_209108211-209108211_T>-	damaging	p.N213fs	chr7_140453136-140453136_A>T	other non-conserving	p.V600E	WT
ACH-002467	RPE1SS51_ENGINEERED			nan	engineered																										WT	WT	WT	WT	WT	WT	WT	WT	WT	WT	WT	WT	WT	WT	WT	WT	WT	WT	WT
ACH-001380	PACADD165_PANCREAS			nan	pancreas																										WT	WT	WT	WT	WT	WT	chr17_7579349-7579349_A>G	other non-conserving	p.F113S	WT	WT	WT	chr2_209113112-209113112_C>A	other non-conserving	p.R132L	WT	WT	WT	WT
ACH-002245	HS445_HAEMATOPOIETIC_AND_LYMPHOID_TISSUE	HS445_HAEMATOPOIETIC_AND_LYMPHOID_TISSUE	1322218	SIDM00668	non_cancerous	nan	nan	nan	nan	nan	nan	nan	nan	nan	nan	nan	nan	nan			0.0365848			-4.77261	-4.77261			-1.39298	-1.05616	-1.05616	WT	WT	WT	WT	WT	WT	WT	WT	WT	WT	WT	WT	WT	WT	WT	WT	WT	WT	WT
ACH-000676	LN464_CENTRAL_NERVOUS_SYSTEM			SIDM00058	central_nervous_system	nan	male	126.6253024	glioma	Caucasian	nan	nan	nan	nan	nan	nan	nan	nan													WT	WT	WT	WT	WT	WT	chr17_7579349-7579349_A>G	other non-conserving	p.F113S	WT	WT	WT	WT	WT	WT	chr7_140453136-140453136_A>T	other non-conserving	p.V600E	WT
ACH-000774	RERFLCAD2_LUNG			nan	lung	nan	male	215.97859019999999	carcinoma	Asian	HSSRB	adherent epithelial-like	RPMI-1640+10% FBS	5% DMSO	nan	70.1	Lung:NSCLC_Adeno	LUAD													WT	WT	WT	WT	WT	WT	chr17_7578454-7578454_G>A	other non-conserving	p.A159V	WT	WT	WT	WT	WT	WT	WT	WT	WT	WT
ACH-001378	PACADD159_PANCREAS			nan	pancreas																										WT	WT	WT	WT	WT	WT	WT	WT	WT	WT	WT	WT	WT	WT	WT	WT	WT	WT	WT
ACH-000562	HCC78_LUNG	HCC78_LUNG	1290908	SIDM01068	lung	65.0	male	101.6889757	carcinoma	Caucasian	DSMZ	Adhrent and aggregates; dt=60-70hrs	RPMI-1640+10%FBS	10% DMSO	60-70 hrs	33.0	Lung:NSCLC_Adeno	LUAD		0.0201064	0.0377406		-5.6362	-4.72774	-4.72774		-0.84906	-1.35438	-1.00815	-1.00815	WT	WT	WT	WT	WT	WT	chr17_7577559-7577559_G>A	other non-conserving	p.S241F	WT	WT	WT	WT	WT	WT	WT	WT	WT	WT
ACH-002299	QIMRWIL_HAEMATOPOIETIC_AND_LYMPHOID_TISSUE	QIMRWIL_HAEMATOPOIETIC_AND_LYMPHOID_TISSUE	910545	SIDM00467	leukemia	nan	nan	nan	nan	nan	nan	nan	nan	nan	nan	nan	nan	LAML			0.049634			-4.33253	-4.33253			-1.01435	-0.585298	-0.585298	WT	WT	WT	WT	WT	WT	WT	WT	WT	WT	WT	WT	WT	WT	WT	WT	WT	WT	WT
ACH-001422	WPE1NA22_PROSTATE			nan	prostate																										WT	WT	WT	WT	WT	WT	WT	WT	WT	WT	WT	WT	WT	WT	WT	WT	WT	WT	WT
ACH-002190	RCCJF_KIDNEY	RCCJF_KIDNEY	1524415	SIDM00818	kidney	nan	nan	nan	nan	nan	nan	nan	nan	nan	nan	nan	nan	KIRC			0.0839511			-3.57431	-3.57431			-0.362004	0.225947	0.225947	WT	WT	WT	WT	WT	WT	WT	WT	WT	chr3_10188200-10188200_C>T	other non-conserving	p.H115Y	WT	WT	WT	WT	WT	WT	WT
ACH-000479	KNS81_CENTRAL_NERVOUS_SYSTEM			SIDM00605	central_nervous_system	65.0	male	163.53037769999997	glioma	Asian	HSSRB	Fibroblast-like	DMEM+15%FBS	10%DMSO	nan	70.0	CNS:Glioma_HighGrade	GBM	3.23078			1.69188				0.132096				0.132096	WT	WT	WT	WT	WT	WT	WT	WT	WT	WT	WT	WT	WT	WT	WT	WT	WT	WT	WT
ACH-000532	SNU61_LARGE_INTESTINE	SNU61_LARGE_INTESTINE	1660035	SIDM00194	colorectal	48.0	male	150.4874262	carcinoma	Asian	KCLB	epithelial; monolayer	RPMI 1640 with L-glutamine (300mg/L), 90%; heat inactivated fetal bovine serum (FBS),10%	nan	39 hrs	nan	Colorectal:Carcinoma	COAD/READ		0.0478508	0.0552908		-4.38531	-4.17682	-4.17682		1.72599	-0.880383	-0.418698	-0.418698	WT	WT	WT	WT	WT	WT	chr17_7578406-7578406_C>T	other non-conserving	p.R175H	WT	WT	WT	WT	WT	WT	WT	WT	WT	WT
ACH-001563	MM127_SKIN			nan	skin																										WT	WT	WT	WT	WT	WT	WT	WT	WT	WT	WT	WT	chr2_209113113-209113113_G>A	other non-conserving	p.R132C	chr7_140481417-140481417_C>T,chr7_140481457-140481457_C>T	other non-conserving,other non-conserving	p.G464E,p.E451K	WT
ACH-000561	TT_OESOPHAGUS	TT_OESOPHAGUS	1299064	SIDM00322	esophagus	nan	nan	170.0951327	nan	nan	HSSRB	nan	DMEM:HAM's F12 1:1 +10% FBS	10%DMSO	1.2 days	51.8	nan	ESCA		0.039916	0.0902068		-4.64689	-3.47062	-3.47062		1.18752	-0.272795	0.336885	0.336885	WT	WT	WT	WT	WT	WT	chr17_7577509-7577509_C>A,chr17_7578208-7578208_T>C	damaging,other non-conserving	p.E258*,p.H214R	WT	WT	WT	WT	WT	WT	WT	WT	WT	WT
ACH-002356	LB647PBL_MATCHED_NORMAL_TISSUE	LB647PBL_Matched_Normal_Tissue		nan	non_cancerous																0.122609			-3.02786	-3.02786			0.108137	0.810605	0.810605	WT	WT	WT	WT	WT	WT	WT	WT	WT	WT	WT	WT	WT	WT	WT	WT	WT	WT	chr17_8139456-8139456_G>T
ACH-002216	BE13_HAEMATOPOIETIC_AND_LYMPHOID_TISSUE	BE13_HAEMATOPOIETIC_AND_LYMPHOID_TISSUE	906763	SIDM01245	leukemia	nan	nan	nan	nan	nan	nan	nan	nan	nan	nan	nan	nan	ALL			0.0771117			-3.69691	-3.69691			-0.467485	0.0947739	0.0947739	WT	WT	WT	WT	WT	WT	chr17_7578442-7578442_T>C,chr17_7579312-7579312_C>T	other non-conserving,damaging	p.Y163C,p.T125T	WT	WT	WT	WT	WT	WT	WT	WT	WT	WT
ACH-000969	KM12_LARGE_INTESTINE	KM12_LARGE_INTESTINE	905989	SIDM00150	colorectal	nan	nan	558.2436121000001	carcinoma	Caucasian	NIBRI	nan	nan	nan	nan	nan	nan	COAD/READ	2.13844		0.138242	1.09656		-2.85473	-4.2421	-0.486977		0.257094	-0.488545	-0.487761	WT	WT	WT	WT	WT	WT	chr17_7578394-7578394_T>C,chr17_7579471-7579471_G>-	other non-conserving,damaging	p.H179R,p.P72fs	WT	WT	WT	WT	WT	WT	chr7_140434564-140434564_C>T,chr7_140482926-140482927_->G	other non-conserving,damaging	p.A712T,p.P403fs	WT
ACH-002354	LB2518EBV_MATCHED_NORMAL_TISSUE	LB2518EBV_Matched_Normal_Tissue		nan	non_cancerous																0.0747239			-3.74229	-3.74229			-0.506528	0.0462203	0.0462203	WT	WT	WT	WT	WT	WT	WT	WT	WT	WT	WT	WT	WT	WT	WT	WT	WT	WT	WT
ACH-001402	SW756_CERVIX	SW756_CERVIX	724839	SIDM01174	cervix	nan	nan	nan	nan	nan	nan	nan	nan	nan	nan	nan	nan	CESC			0.103606			-3.27082	-3.27082			-0.100895	0.550657	0.550657	chrX_76937438-76937438_T>C,chrX_76944322-76944322_G>A	other non-conserving,other non-conserving	p.R1104G,p.L195F	WT	WT	WT	WT	WT	WT	WT	WT	WT	WT	WT	WT	WT	WT	WT	WT
ACH-002023	TGBC18TKB_LARGE_INTESTINE			nan	colorectal																										WT	WT	WT	WT	WT	WT	WT	WT	WT	WT	WT	WT	WT	WT	WT	chr7_140453191-140453191_T>A,chr7_140453193-140453193_T>G	other non-conserving,damaging	p.I582L,p.N581T	WT
ACH-001224	UMRC2_KIDNEY			nan	kidney	nan	nan	nan	carcinoma	nan	nan	nan	nan	nan	nan	nan	nan	KIRC
ACH-002351	L542_MATCHED_NORMAL_TISSUE	L542_Matched_Normal_Tissue		nan	non_cancerous																0.128795			-2.95685	-2.95685			0.169234	0.886583	0.886583	WT	WT	WT	WT	WT	WT	WT	WT	WT	WT	WT	WT	WT	WT	WT	WT	WT	WT	chr17_8133901-8133901_G>A
ACH-001421	WERIRB1_AUTONOMIC_GANGLIA			nan	eye																										WT	WT	WT	WT	WT	WT	chr17_7579395-7579395_G>A	other non-conserving	p.P98S	WT	WT	WT	WT	WT	WT	WT	WT	WT	WT
ACH-000554	UACC893_BREAST	UACC893_BREAST	909778	SIDM01186	breast	57.0	female	114.8285989	carcinoma	Caucasian	ATCC	Adherent Epithelial	L15+10%FBS	5%DMSO	nan	nan	Breast:Carcinoma	BRCA	1.55428		0.0827421	0.636244		-3.59523	-4.9826	-0.965657		-0.38001	-1.28083	-1.12324	WT	WT	WT	WT	WT	WT	chr17_7574003-7574003_G>A	damaging	p.R342*	WT	WT	WT	WT	WT	WT	WT	WT	WT	WT
ACH-000001	NIHOVCAR3_OVARY	NIHOVCAR3_OVARY	905933	SIDM00105	ovary	60.0	female	83.80695109	carcinoma	Caucasian	ATCC	adherenet; epithelial	RPMI+20%FBS	5%DMSO	nan	nan	Ovary:Carcinoma	OV	1.49314		0.0540648	0.578347		-4.20917	-4.20917	-1.02586		-0.908216	-0.45331	-0.739587	WT	WT	WT	WT	WT	WT	chr17_7577538-7577538_C>T	other non-conserving	nan	WT	WT	WT	WT	WT	WT	WT	WT	WT	WT
ACH-000936	EFO27_OVARY	EFO27_OVARY	906852	SIDM01051	ovary	36.0	female	426.5639766	carcinoma	Caucasian	NIBRI	nan	nan	nan	nan	nan	Ovary:Carcinoma	OV	2.32405		0.0434292	1.21664		-4.52519	-4.52519	-0.362102		-1.18011	-0.791435	-0.576768	WT	WT	WT	WT	WT	WT	chr17_7577121-7577121_G>A,chr17_7579591-7579591_C>T	other non-conserving,damaging	p.R273C,nan	WT	WT	WT	WT	WT	WT	WT	WT	WT	WT
ACH-000450	MELHO_SKIN	MELHO_SKIN	908124	SIDM00337	skin	nan	female	103.18270890000001	malignant_melanoma	Caucasian	DSMZ	EPITHELIAL-LIKE ADHERENT CELLS WITH LONG, NARROW, OFTEN BRANCHING CELL BODIES	RPMI-1640+10% FBS	5%DMSO	24 hrs	35.9	Skin:Melanoma	SKCM			0.213361			-2.22863	-3.616			0.795769	0.181341	0.181341	WT	WT	WT	WT	WT	WT	WT	WT	WT	WT	WT	WT	WT	WT	WT	chr7_140453136-140453136_A>T	other non-conserving	p.V600E	WT
ACH-002214	BC1_HAEMATOPOIETIC_AND_LYMPHOID_TISSUE	BC1_HAEMATOPOIETIC_AND_LYMPHOID_TISSUE	910919	SIDM00896	lymphoma	nan	nan	nan	nan	nan	nan	nan	nan	nan	nan	nan	nan	DLBC			0.0732895			-3.77025	-3.77025			-0.530587	0.0163016	0.0163016	WT	WT	WT	WT	WT	WT	WT	WT	WT	WT	WT	WT	WT	WT	WT	WT	WT	WT	chr17_8146389-8146389_C>A
ACH-001067	F5_CENTRAL_NERVOUS_SYSTEM			nan	central_nervous_system	nan	male	nan	meningioma	nan	nan	nan	nan	nan	nan	nan	nan	nan													chrX_76949410-76949410_C>T	silent	p.Q129Q	WT	WT	WT	WT	WT	WT	WT	WT	WT	WT	WT	WT	WT	WT	WT	WT
ACH-001048	COV504_OVARY			nan	ovary	nan	female	nan	carcinoma	Caucasian	GNF	nan	nan	nan	nan	nan	nan	OV		0.0346441			-4.85125				0.766828				WT	WT	WT	WT	WT	WT	chr17_7576879-7576880_GT>-	damaging	p.L323fs	WT	WT	WT	WT	WT	WT	WT	WT	WT	WT
ACH-000087	SKES1_BONE	SKES1_BONE	684072	SIDM01111	bone	18.0	male	72.55788779	Ewings_sarcoma-peripheral_primitive_neuroectodermal_tumour	Caucasian	NIBRI	nan	nan	nan	nan	nan	Bone:Sarcoma_Ewing	SARC			0.201982			-2.3077	-3.69507			0.72774	0.0967414	0.0967414	WT	WT	WT	WT	WT	WT	chr17_7578403-7578403_C>A	other non-conserving	p.C176F	WT	WT	WT	WT	WT	WT	WT	WT	WT	WT
ACH-001164	CCLFPEDS0003T_SOFT_TISSUE			nan	soft_tissue																										WT	WT	WT	WT	WT	WT	WT	WT	WT	WT	WT	WT	WT	WT	WT	WT	WT	WT	WT
ACH-000779	PC9_LUNG			SIDM00236	lung	nan	nan	nan	nan	nan	nan	nan	nan	nan	nan	nan	nan	LUAD													WT	WT	WT	chr6_33288562-33288562_G>A	silent	p.L330L	chr17_7577538-7577538_C>T	other non-conserving	nan	chr3_10183834-10183834_G>T	silent	p.L101L	WT	WT	WT	WT	WT	WT	WT
ACH-000634	LN340_CENTRAL_NERVOUS_SYSTEM			nan	central_nervous_system	nan	male	133.5386942	glioma	Caucasian	nan	nan	nan	nan	nan	nan	nan	nan													WT	WT	WT	WT	WT	WT	chr17_7578388-7578388_C>G	other non-conserving	p.R181P	WT	WT	WT	WT	WT	WT	WT	WT	WT	WT
ACH-002167	NCC010_KIDNEY	NCC010_KIDNEY	1509073	SIDM00231	kidney	nan	nan	nan	nan	nan	nan	nan	nan	nan	nan	nan	nan	KIRC			0.076272			-3.7127	-5.10007			-0.481075	-1.40652	-1.40652	WT	WT	WT	WT	WT	WT	WT	WT	WT	chr3_10188245-10188245_G>T	other non-conserving	p.V130F	WT	WT	WT	WT	WT	WT	WT
ACH-002330	SKBR7_BREAST			nan	breast
ACH-000942	HPBALL_HAEMATOPOIETIC_AND_LYMPHOID_TISSUE			nan	blood	14.0	male	498.98304670000005	lymphoid_neoplasm	Asian	DSMZ	rond or polymorph cells growing singly or in clusters in suspentipn	80-90% RPMI 1640 +10-20% h.i. FBS	nan	~ 50 hrs	nan	Leukemia:ALL	ALL		0.0343977			-4.86154				0.745635				WT	WT	WT	WT	WT	WT	chr17_7579315-7579315_G>T	damaging	p.C124*	WT	WT	WT	WT	WT	WT	WT	WT	WT	WT
ACH-000492	MUTZ5_HAEMATOPOIETIC_AND_LYMPHOID_TISSUE			nan	blood	26.0	male	130.12320449999999	lymphoid_neoplasm	Caucasian	DSMZ	SUSPENSION	RPMI-1640 +20% FBS	5% DMSO	nan	279.2	Leukemia:ALL	ALL		0.0245815			-5.34628				-0.252237				WT	WT	WT	WT	WT	WT	WT	WT	WT	WT	WT	WT	WT	WT	WT	WT	WT	WT	WT
ACH-000839	SCABER_URINARY_TRACT	SCABER_URINARY_TRACT		SIDM00032	urinary_tract	58.0	male	173.1708489	carcinoma	African_american	ATCC	Adherent epithelial	EMEM +10%FBS	5%DMSO	nan	52.6	Bladder:Carcinoma	BLCA	2.10744		0.111304	1.07549		-3.16742	-4.55479	-0.508885		-0.0119347	-0.823102	-0.665994	WT	WT	WT	WT	WT	WT	chr17_7579358-7579358_C>A	other non-conserving	p.R110L	WT	WT	WT	WT	WT	WT	WT	WT	WT	WT
ACH-000177	NCIH660_PROSTATE	NCIH660_PROSTATE	1330975	SIDM01123	prostate	63.0	male	86.31007528	carcinoma	Caucasian	GNF	nan	nan	nan	nan	nan	Prostate:Carcinoma	PRAD		0.0212231	0.0989454		-5.55822	-3.33722	-3.33722		-0.68853	-0.158026	0.47961	0.47961	WT	WT	WT	WT	WT	WT	WT	WT	WT	WT	WT	WT	WT	WT	WT	chr7_140624369-140624369_C>G	other non-conserving	p.E45D	WT
ACH-000568	UACC812_BREAST	UACC812_BREAST	910910	SIDM01187	breast	43.0	female	117.5512763	carcinoma	Caucasian	ATCC	mostly adherent epithelial, some clusters in suspension	RPMI-1640 + 20% FBS	5%DMSO	nan	219.2	Breast:Carcinoma	BRCA	2.57573		0.034081	1.36498		-4.87489	-4.87489	-0.207845		-1.48098	-1.16559	-0.686716	WT	WT	WT	WT	WT	WT	WT	WT	WT	WT	WT	WT	WT	WT	WT	WT	WT	WT	WT
ACH-000997	HCT15_LARGE_INTESTINE	HCT15_LARGE_INTESTINE	905937	SIDM00789	colorectal	nan	male	2069.977291	carcinoma	Caucasian	NIBRI	nan	nan	nan	nan	36.2	Colorectal:Carcinoma	COAD/READ	6.40782		0.257284	2.67983		-1.95857	-3.34593	1.15946		1.02812	0.470292	0.814877	chrX_76938862-76938862_A>C	other non-conserving	p.L629R	chr6_33289693-33289693_C>T	other non-conserving	p.A4T	chr17_7573010-7573010_T>G,chr17_7577559-7577559_G>A	damaging,other non-conserving	nan,p.S241F	WT	WT	WT	chr2_209113217-209113217_C>T	other non-conserving	p.G97D	WT	WT	WT	chr17_8135080-8135080_C>T
ACH-001310	HA1E_KIDNEY			nan	engineered_kidney																										WT	WT	WT	WT	WT	WT	WT	WT	WT	WT	WT	WT	WT	WT	WT	WT	WT	WT	WT
ACH-001857	SG231_BILIARY_TRACT			nan	bile_duct																										WT	WT	WT	WT	WT	WT	chr17_7579314-7579314_T>G	other non-conserving	p.T125P	WT	WT	WT	WT	WT	WT	WT	WT	WT	WT
ACH-002384	HCC1954_MATCHED_NORMAL_TISSUE	HCC1954_Matched_Normal_Tissue		SIDM00871	non_cancerous																0.193607			-2.3688	-2.3688			0.675176	1.51576	1.51576	WT	WT	WT	WT	WT	WT	WT	WT	WT	WT	WT	WT	WT	WT	WT	WT	WT	WT	WT
ACH-000153	NCIH2052_PLEURA	NCIH2052_PLEURA	688058	SIDM00713	lung	65.0	male	89.75888173	mesothelioma	Caucasian	ATCC	adherent	RPMI-1640 +10 % FBS	5% DMSO	nan	194.2	Lung:Mesothelioma	MESO	2.96566		0.154018	1.56835		-2.69883	-4.0862	0.00363829		0.391227	-0.321739	-0.15905	WT	WT	WT	WT	WT	WT	WT	WT	WT	WT	WT	WT	WT	WT	WT	WT	WT	WT	WT
ACH-000901	HCC1359_LUNG			nan	lung	55.0	female	273.6119221	carcinoma	African_american	KCLB	ADHERENT, EPITHELIAL MONOLAYER	RPMI-1640+10% FBS	5%DMSO	nan	42.1	Lung:NSCLC_Large_Cell	nan													chrX_76937602-76937603_->T	damaging	p.I1049fs	WT	WT	WT	chr17_7578542-7578542_G>A	other non-conserving	p.L130F	WT	WT	WT	WT	WT	WT	WT	WT	WT	WT
ACH-000932	SNU1_STOMACH	SNU1_STOMACH	908444	SIDM01146	gastric	44.0	male	456.86095930000005	carcinoma	Asian	NIBRI	nan	nan	nan	nan	nan	Gastric:Carcinoma	STAD	3.79199		0.179185	1.92295		-2.48048	-3.86784	0.372386		0.579089	-0.0881182	0.142134	WT	WT	WT	WT	WT	WT	WT	WT	WT	WT	WT	WT	WT	WT	WT	chr7_140482936-140482936_G>A	other non-conserving	p.A400V	WT
ACH-000828	ZR7530_BREAST	ZR7530_BREAST	909907	SIDM00971	breast	47.0	female	175.8765413	carcinoma	African_american	GNF	nan	nan	nan	110 hrs	nan	Breast:Carcinoma	BRCA			0.0622178			-4.00653	-4.00653			-0.733873	-0.236501	-0.236501	chrX_76776325-76776325_C>T	other non-conserving	p.E2381K	WT	WT	WT	WT	WT	WT	WT	WT	WT	WT	WT	WT	chr7_140500165-140500165_A>G	other non-conserving	p.I326T	WT
ACH-000122	SUPT11_HAEMATOPOIETIC_AND_LYMPHOID_TISSUE			nan	blood	74.0	male	76.68730425	lymphoid_neoplasm	Caucasian	DSMZ	suspension	RPMI + 10 % FBS	5% DMSO	nan	78.9	Lymphoma:NH_T_cell	nan													WT	WT	WT	WT	WT	WT	chr17_7577534-7577534_C>G,chr17_7578212-7578212_G>A	other non-conserving,damaging	p.R249S,p.R213*	WT	WT	WT	WT	WT	WT	WT	WT	WT	WT
ACH-001556	MERO25_PLEURA			nan	lung																										WT	WT	WT	WT	WT	WT	WT	WT	WT	WT	WT	WT	WT	WT	WT	WT	WT	WT	WT
ACH-001511	H413_UPPER_AERODIGESTIVE_TRACT			nan	upper_aerodigestive																										chrX_76939701-76939701_G>C	silent	p.P349P	WT	WT	WT	WT	WT	WT	WT	WT	WT	WT	WT	WT	WT	WT	WT	WT
ACH-001147	OCILY12_HAEMATOPOIETIC_AND_LYMPHOID_TISSUE			nan	lymphocyte																										WT	WT	WT	WT	WT	WT	chr17_7577569-7577569_A>G	other non-conserving	p.C238R	WT	WT	WT	WT	WT	WT	WT	WT	WT	WT
ACH-001060	DL40_HAEMATOPOIETIC_AND_LYMPHOID_TISSUE			nan	lymphocyte																										WT	WT	WT	WT	WT	WT	chr17_7578403-7578403_C>A	other non-conserving	p.C176F	WT	WT	WT	WT	WT	WT	WT	WT	WT	WT
ACH-001020	BT16_SOFT_TISSUE			nan	soft_tissue	nan	nan	nan	nan	nan	nan	nan	nan	nan	nan	nan	nan	nan													WT	WT	WT	WT	WT	WT	WT	WT	WT	WT	WT	WT	WT	WT	WT	WT	WT	WT	WT
ACH-001852	HKGZCC_BILIARY_TRACT			nan	bile_duct																										WT	WT	WT	WT	WT	WT	WT	WT	WT	WT	WT	WT	WT	WT	WT	WT	WT	WT	WT
ACH-001010	A673STAG2NT23_ENGINEERED			nan	engineered_bone
ACH-002017	OMM1_UVEA			nan	eye																										WT	WT	WT	WT	WT	WT	WT	WT	WT	WT	WT	WT	WT	WT	WT	chr7_140453124-140453124_C>A	other non-conserving	p.W604L	chr17_8139651-8139651_G>T
ACH-000684	KMRC1_KIDNEY	KMRC1_KIDNEY	1298168	SIDM00611	kidney	nan	male	204.6747718	carcinoma	Asian	HSRRB	nan	DMEM+10% FBS	5% DMSO	nan	46.4	Kidney:Carcinoma	KIRC			0.168344			-2.57052	-3.95788			0.501624	-0.184452	-0.184452	WT	WT	WT	WT	WT	WT	WT	WT	WT	chr3_10183755-10183757_TCT>-	other non-conserving	p.F76del	WT	WT	WT	WT	WT	WT	WT
ACH-002294	PCI15A_UPPER_AERODIGESTIVE_TRACT	PCI15A_UPPER_AERODIGESTIVE_TRACT	1240204	SIDM00270	upper_aerodigestive	nan	nan	nan	nan	nan	nan	nan	nan	nan	nan	nan	nan	HNSC			0.0325845			-4.93967	-4.93967			-1.53672	-1.2349	-1.2349	WT	WT	WT	WT	WT	WT	chr17_7577121-7577121_G>A	other non-conserving	p.R273C	WT	WT	WT	WT	WT	WT	WT	WT	WT	WT
ACH-002320	600MPE_BREAST			nan	breast
ACH-002324	HCC3153_BREAST			nan	breast
ACH-000292	NCIH841_LUNG	NCIH841_LUNG	1240192	SIDM01134	lung	51.0	male	131.4714216	carcinoma	Caucasian	nan	nan	nan	nan	nan	40.5	Lung:SCLC	SCLC	4.39101		0.0816182	2.13455		-3.61497	-3.61497	0.592425		-0.396985	0.182445	0.387435	chrX_76939650-76939650_C>A	other non-conserving	p.M366I	WT	WT	WT	chr17_7577556-7577556_C>G	other non-conserving	p.C242S	WT	WT	WT	WT	WT	WT	WT	WT	WT	WT
ACH-000978	EN_ENDOMETRIUM	EN_ENDOMETRIUM	1240127	SIDM01045	uterus	50.0	female	1022.278488	carcinoma	Asian	DSMZ	adherent epitheloid cells growing in monolayers	DMEM+20% FBS	5% DMSO	50-80 hrs	93.9	Endometrium:Carcinoma	UCEC			1.87521			0.907052	-0.480314			3.4936	3.53631	3.53631	chrX_76874315-76874316_->T,chrX_76918920-76918921_->T	damaging,damaging	p.R1803fs,p.K1357fs	chr6_33286926-33286926_A>G	other non-conserving	p.S671P	chr17_7577120-7577120_C>T,chr17_7579312-7579312_C>A	other non-conserving,damaging	p.R273H,p.T125T	WT	WT	WT	chr2_209116180-209116180_A>-	damaging	p.F32fs	chr7_140500166-140500166_T>C,chr7_140534547-140534547_A>G	other non-conserving,silent	p.I326V,p.S122S	WT
ACH-001605	NO10_CENTRAL_NERVOUS_SYSTEM	NO10_CENTRAL_NERVOUS_SYSTEM	908452	SIDM00574	central_nervous_system	nan	nan	nan	nan	nan	nan	nan	nan	nan	nan	nan	nan	LGG			0.160854			-2.63618	-4.02354			0.445132	-0.254705	-0.254705	WT	WT	WT	WT	WT	WT	chr17_7577548-7577548_C>T	other non-conserving	nan	WT	WT	WT	WT	WT	WT	WT	WT	WT	WT
ACH-000672	IALM_LUNG	IALM_LUNG	910779	SIDM00306	lung	68.0	male	196.59507130000003	carcinoma	Asian	RIKEN	ADHERENT EPITHELIAL;	HAMSF10+ 10% FBS	5% DMSO	nan	143.2	Lung:NSCLC_Large_Cell	nan			0.151634			-2.72133	-4.1087			0.371864	-0.345819	-0.345819	WT	WT	WT	WT	WT	WT	chr17_7578275-7578275_G>A	damaging	p.Q192*	WT	WT	WT	WT	WT	WT	WT	WT	WT	WT
ACH-002062	SLVL_HAEMATOPOIETIC_AND_LYMPHOID_TISSUE	SLVL_HAEMATOPOIETIC_AND_LYMPHOID_TISSUE		SIDM00374	lymphocyte	nan	nan	nan	nan	nan	nan	nan	nan	nan	nan	nan	nan	DLBC			0.0509374			-4.29513	-4.29513			-0.982177	-0.545286	-0.545286	WT	WT	WT	WT	WT	WT	chr17_7579705-7579705_C>T	other non-conserving	p.V31I	WT	WT	WT	WT	WT	WT	WT	WT	WT	WT
ACH-002115	EW18_BONE	EW18_BONE	949164	SIDM00197	bone	nan	nan	nan	nan	nan	nan	nan	nan	nan	nan	nan	nan	nan			0.125254			-2.99707	-4.38444			0.13463	-0.640838	-0.640838	chrX_76855222-76855222_A>C	damaging	p.L1922*	WT	WT	WT	chr17_7578403-7578403_C>A	other non-conserving	p.C176F	WT	WT	WT	WT	WT	WT	WT	WT	WT	WT
ACH-000393	HLF_LIVER			SIDM00065	liver	69.0	male	141.70957080000002	carcinoma	Asian	HSRRB	ADHERENT	DMEM+5% FBS	5% DMSO	nan	58.2	Liver:HCC	LIHC													WT	WT	WT	WT	WT	WT	chr17_7577550-7577550_C>G	other non-conserving	p.G244A	WT	WT	WT	WT	WT	WT	WT	WT	WT	WT
ACH-000299	HNT34_HAEMATOPOIETIC_AND_LYMPHOID_TISSUE			nan	blood	nan	nan	nan	nan	nan	nan	nan	nan	nan	nan	nan	nan	LAML													WT	WT	WT	WT	WT	WT	WT	WT	WT	WT	WT	WT	WT	WT	WT	WT	WT	WT	WT
ACH-002198	SCH_STOMACH	SCH_STOMACH	909711	SIDM00383	gastric	nan	nan	nan	nan	nan	nan	nan	nan	nan	nan	nan	nan	STAD			0.906292			-0.141952	-1.52932			2.59108	2.41395	2.41395	WT	WT	WT	WT	WT	WT	chr17_7577533-7577534_->CCT	other non-conserving	p.249_250insR	WT	WT	WT	WT	WT	WT	WT	WT	WT	WT
ACH-001694	UPCISCC074_UPPER_AERODIGESTIVE_TRACT			nan	upper_aerodigestive																										chrX_76918876-76918876_C>T	other non-conserving	p.R1372K	WT	WT	WT	chr17_7577120-7577120_C>T,chr17_7578534-7578534_C>A	other non-conserving,other non-conserving	p.R273H,p.K132N	WT	WT	WT	WT	WT	WT	WT	WT	WT	WT
ACH-000538	HUTU80_SMALL_INTESTINE	HUTU80_SMALL_INTESTINE	907073	SIDM00694	gastric	53.0	male	129.2237006	carcinoma	African_american	NIBRI	nan	nan	nan	nan	nan	nan	nan	13.2973		0.220286	3.73306		-2.18255	-2.18255	2.25471		0.835416	1.71503	1.98487	WT	WT	WT	WT	WT	WT	WT	WT	WT	WT	WT	WT	WT	WT	WT	WT	WT	WT	WT
ACH-000398	RI1_HAEMATOPOIETIC_AND_LYMPHOID_TISSUE			nan	lymphocyte	57.0	female	124.76372179999998	lymphoid_neoplasm	Caucasian	DSMZ	large round cells growing in suspention	90% RPMI 1640 +10% h.i. FBS	nan	~ 48-72 hrs	nan	Lymphoma:NH_B_cell	DLBC													WT	WT	WT	WT	WT	WT	chr17_7577058-7577058_C>A,chr17_7578535-7578535_T>C	damaging,other non-conserving	p.E294*,p.K132R	WT	WT	WT	WT	WT	WT	WT	WT	WT	WT
ACH-000643	HDQP1_BREAST	HDQP1_BREAST	1290922	SIDM01062	breast	50.0	female	148.6957261	carcinoma	Caucasian	DSMZ	adherent monolayers	DMEM+10% FBS	5% DMSO	72hrs	63.0	Breast:Carcinoma	BRCA	2.05115		0.161211	1.03644		-2.63298	-4.02034	-0.5495		0.447883	-0.251283	-0.400391	WT	WT	WT	WT	WT	WT	chr17_7578212-7578212_G>A	damaging	p.R213*	WT	WT	WT	WT	WT	WT	WT	WT	WT	WT
ACH-000540	HS606T_FIBROBLAST			nan	fibroblast	44.0	female	110.7616206	carcinoma	Caucasian	ATCC	adherent fibroblast	DMEM+10% FBS	5% DMSO	nan	365.0	nan	nan		0.026278			-5.25				-0.0540409				chrX_76939673-76939674_->T	damaging	p.L359fs	WT	WT	WT	WT	WT	WT	WT	WT	WT	WT	WT	WT	WT	WT	WT	chr17_8135082-8135082_G>A
ACH-000515	HCC33_LUNG	HCC33_LUNG	1303901	SIDM01071	lung	52.0	male	126.74597959999998	carcinoma	Caucasian	DSMZ	ROUND TO OVOID CELLS GROWING SINGLY OR IN CLUMPS	RPMI-1640+20% FBS	5% DMSO	40 hrs	93.7	Lung:SCLC	SCLC	5.80402		0.0641178	2.53705		-3.96313	-3.96313	1.01098		-0.696535	-0.190069	0.410458	WT	WT	WT	WT	WT	WT	chr17_7577556-7577556_C>T	other non-conserving	p.C242Y	WT	WT	WT	WT	WT	WT	WT	WT	WT	WT
ACH-000025	CH157MN_CENTRAL_NERVOUS_SYSTEM			nan	central_nervous_system	nan	nan	78.03854857	meningioma	Caucasian	nan	nan	nan	nan	nan	nan	nan	nan													WT	WT	WT	WT	WT	WT	WT	WT	WT	WT	WT	WT	WT	WT	WT	WT	WT	WT	chr17_8133962-8133962_C>T
ACH-000239	HUG1N_STOMACH			nan	gastric	55.0	male	146.93699469999999	carcinoma	Asian	GNF	nan	nan	nan	nan	nan	Gastric:Carcinoma	STAD		0.0204068			-5.61481				-0.805021				WT	WT	WT	WT	WT	WT	chr17_7578271-7578271_T>G	other non-conserving	p.H193P	WT	WT	WT	WT	WT	WT	WT	WT	WT	chr17_8133940-8133940_G>A
ACH-000480	HUH7_LIVER	HUH7_LIVER	907071	SIDM00585	liver	57.0	male	156.8998825	carcinoma	Asian	HSSRB	nan	Dulbecco's modified Eagle's medium with 10% fetal bovine serum. Refer cancer Res. 42:3858 (1982) for other medium with low serum concentration.	nan	nan	nan	Liver:HCC	LIHC			1.28204			0.358441	-1.02892			3.0216	2.94933	2.94933	WT	WT	WT	WT	WT	WT	chr17_7578190-7578190_T>C	other non-conserving	p.Y220C	WT	WT	WT	WT	WT	WT	WT	WT	WT	WT
ACH-001415	UMUC7_URINARY_TRACT			nan	urinary_tract																										WT	WT	WT	WT	WT	WT	chr17_7578212-7578212_G>A	damaging	p.R213*	WT	WT	WT	WT	WT	WT	WT	WT	WT	WT
ACH-000748	SJSA1_BONE	SJSA1_BONE	909717	SIDM01112	bone	19.0	male	160.4233812	osteosarcoma	African_american	ATCC	Fibroblast like adherent	RPMI1640+10%FBS	5%DMSO	nan	98.2	Bone:Sarcoma_Osteo	SARC			0.144355			-2.79231	-4.17967			0.310802	-0.421754	-0.421754	chrX_76939673-76939674_->T	damaging	p.L359fs	chr6_33287504-33287504_C>T	silent	p.S531S	chr17_7577120-7577120_C>T	other non-conserving	p.R273H	WT	WT	WT	WT	WT	WT	WT	WT	WT	chr17_8138477-8138477_G>A
ACH-000520	59M_OVARY			nan	ovary	nan	female	110.6123314	carcinoma	Caucasian	ECACC	nan	nan	nan	nan	nan	Ovary:Carcinoma	OV	8.53835			3.09396				1.59011				1.59011	chrX_76776888-76776888_G>T	damaging	p.S2355*	WT	WT	WT	chr17_7578257-7578272_CCACTCGGATAAGATG>-	damaging	p.HLIRVE193fs	WT	WT	WT	WT	WT	WT	WT	WT	WT	WT
ACH-002122	GT3TKB_STOMACH	GT3TKB_STOMACH	907041	SIDM01231	lung	nan	nan	nan	nan	nan	nan	nan	nan	nan	nan	nan	nan	STAD			0.259523			-1.94607	-3.33343			1.03888	0.483667	0.483667	WT	WT	WT	WT	WT	WT	chr17_7579377-7579377_G>A	damaging	p.Q104*	WT	WT	WT	WT	WT	WT	WT	WT	WT	WT
ACH-001148	OCILY132_HAEMATOPOIETIC_AND_LYMPHOID_TISSUE			nan	lymphocyte																										WT	WT	WT	WT	WT	WT	WT	WT	WT	WT	WT	WT	WT	WT	WT	WT	WT	WT	WT
ACH-000031	PANC0213_PANCREAS			nan	pancreas	64.0	female	53.8707524	carcinoma	Caucasian	NIBRI	nan	nan	nan	nan	nan	Pancreas:Carcinoma	PAAD		0.0228759			-5.45003				-0.465805				WT	WT	WT	WT	WT	WT	chr17_7577121-7577121_G>A	other non-conserving	p.R273C	WT	WT	WT	WT	WT	WT	WT	WT	WT	WT
ACH-001334	C4I_CERVIX	C4I_CERVIX	687506	SIDM00905	cervix	nan	nan	nan	nan	nan	nan	nan	nan	nan	nan	nan	nan	CESC			0.0321616			-4.95852	-4.95852			-1.55293	-1.25506	-1.25506	WT	WT	WT	WT	WT	WT	WT	WT	WT	WT	WT	WT	WT	WT	WT	WT	WT	WT	WT
ACH-000043	HS895T_FIBROBLAST			nan	fibroblast	48.0	female	56.09099205	malignant_melanoma	Caucasian	NIBRI	nan	nan	nan	nan	nan	Skin:Melanoma	SKCM		0.0323497			-4.9501				0.563325				WT	WT	WT	WT	WT	WT	WT	WT	WT	WT	WT	WT	WT	WT	WT	WT	WT	WT	WT
ACH-000179	NCIH1618_LUNG			nan	lung	55.0	female	99.00667914	carcinoma	Caucasian	ATCC	nan	DMEM:HAM's F12 1:1 +5% FBS	5%DMSO	nan	nan	Lung:SCLC	SCLC	2.83327			1.50247				-0.0648727				-0.0648727	WT	WT	WT	WT	WT	WT	chr17_7577538-7577538_C>A	other non-conserving	p.R248L	WT	WT	WT	WT	WT	WT	WT	WT	WT	WT
ACH-002246	HS633T_SOFT_TISSUE	HS633T_SOFT_TISSUE	1240149	SIDM00667	soft_tissue	nan	nan	nan	nan	nan	nan	nan	nan	nan	nan	nan	nan	nan			0.123942			-3.01226	-4.39963			0.121559	-0.657092	-0.657092	chrX_76938747-76938747_C>T	silent	p.P667P	WT	WT	WT	chr17_7577086-7577086_T>-	damaging	p.T284fs	WT	WT	WT	WT	WT	WT	WT	WT	WT	WT
ACH-000337	NCIH3122_LUNG	NCIH3122_LUNG	1240190	SIDM00137	lung	nan	nan	nan	nan	nan	nan	nan	nan	nan	nan	nan	nan	LUAD			0.0308034			-5.02077	-5.02077			-1.60649	-1.32167	-1.32167	WT	WT	WT	WT	WT	WT	chr17_7577084-7577084_T>A	other non-conserving	p.E285V	WT	WT	WT	WT	WT	WT	WT	WT	WT	WT
ACH-001642	SCC3_HAEMATOPOIETIC_AND_LYMPHOID_TISSUE	SCC3_HAEMATOPOIETIC_AND_LYMPHOID_TISSUE	910930	SIDM00384	lymphocyte	nan	nan	nan	nan	nan	nan	nan	nan	nan	nan	nan	nan	DLBC			0.0450515			-4.47228	-4.47228			-1.13459	-0.734825	-0.734825	WT	WT	WT	WT	WT	WT	WT	WT	WT	WT	WT	WT	WT	WT	WT	WT	WT	WT	WT
ACH-000786	DAUDI_HAEMATOPOIETIC_AND_LYMPHOID_TISSUE	DAUDI_HAEMATOPOIETIC_AND_LYMPHOID_TISSUE	906831	SIDM00845	lymphocyte	16.0	male	172.3342748	lymphoid_neoplasm	African_american	NIBRI	nan	nan	nan	nan	nan	Lymphoma:NH_B_cell	DLBC			0.407607			-1.29475	-1.29475			1.59925	2.66492	2.66492	chrX_76763895-76763895_T>G,chrX_76763924-76763924_G>A,chrX_76763968-76763968_T>G,chrX_76763976-76763976_C>T,chrX_76763985-76763985_G>A,chrX_76777808-76777808_T>G,chrX_76777814-76777814_C>G,chrX_76812967-76812967_A>C,chrX_76812978-76812978_A>G,chrX_76874286-76874286_A>G,chrX_76874307-76874307_G>A,chrX_76874331-76874331_G>C,chrX_76874361-76874361_A>T,chrX_76875939-76875939_A>T,chrX_76907745-7690774…	silent,other non-conserving,other non-conserving,silent,silent,other non-conserving,other non-conserving,silent,silent,silent,silent,silent,silent,silent,silent,other non-conserving,other non-conserving,silent	p.P2471P,p.P2462S,p.N2447T,p.L2444L,p.P2441P,p.N2303T,p.S2301T,p.P2218P,p.L2215L,p.A1812A,p.H1805H,p.V1797V,p.G1787G,p.S1732S,p.S1472S,p.E155D,p.T154A,p.Q129Q	WT	WT	WT	chr17_7577141-7577141_C>T	other non-conserving	p.G266E	WT	WT	WT	WT	WT	WT	chr7_140434475-140434475_C>T,chr7_140434505-140434505_G>A,chr7_140453087-140453087_G>A,chr7_140453126-140453126_T>C,chr7_140476732-140476732_T>C,chr7_140476735-140476735_T>A,chr7_140476780-140476780_A>G,chr7_140476795-140476795_C>T,chr7_140494186-140494186_T>G,chr7_140494246-140494246_C>T,chr7_140501229-140501229_A>T,chr7_140501247-140501247_T>C,chr7_140508721-140508721_C>T,chr7_140508730-1405087…	silent,silent,silent,silent,silent,silent,silent,silent,silent,silent,silent,silent,silent,silent,silent	p.E741E,p.P731P,p.S616S,p.R603R,p.R558R,p.A557A,p.H542H,p.L537L,p.R354R,p.P334P,p.V281V,p.E275E,p.E193E,p.L190L,p.G70G	WT
ACH-002292	OACP4C_OESOPHAGUS	OACP4C_OESOPHAGUS	1503362	SIDM00445	esophagus	nan	nan	nan	nan	nan	nan	nan	nan	nan	nan	nan	nan	ESCA			0.0570653			-4.13124	-4.13124			-0.841172	-0.369936	-0.369936	WT	WT	WT	WT	WT	WT	chr17_7578275-7578275_G>A	damaging	p.Q192*	WT	WT	WT	WT	WT	WT	WT	WT	WT	WT
ACH-000855	KYSE150_OESOPHAGUS	KYSE150_OESOPHAGUS	907317	SIDM01031	esophagus	49.0	female	248.1113517	carcinoma	Asian	DSMZ	Epithelial adherent monolayer	RPMI:Ham F12 +5%FBS	10%DMSO	nan	40.0	Oesophagus:Carcinoma	ESCA			0.222711			-2.16676	-3.55412			0.849005	0.247544	0.247544	WT	WT	WT	WT	WT	WT	chr17_7577538-7577538_C>T	other non-conserving	nan	WT	WT	WT	WT	WT	WT	WT	WT	WT	WT
ACH-000464	CAS1_CENTRAL_NERVOUS_SYSTEM	CAS1_CENTRAL_NERVOUS_SYSTEM	910943	SIDM00212	central_nervous_system	63.0	male	119.26945009999999	glioma	Caucasian	ICLC	Adherenet	DMEM +10%FBS	5% DMSO	nan	79.5	CNS:Glioma_HighGrade	GBM	1.65966		0.111112	0.730889		-3.16991	-4.55728	-0.867236		-0.0140777	-0.825767	-0.846502	WT	WT	WT	WT	WT	WT	chr17_7577539-7577539_G>A	other non-conserving	p.R248W	WT	WT	WT	WT	WT	WT	WT	WT	WT	WT
ACH-002260	KOSC2_UPPER_AERODIGESTIVE_TRACT	KOSC2_UPPER_AERODIGESTIVE_TRACT	753570	SIDM00603	upper_aerodigestive	nan	nan	nan	nan	nan	nan	nan	nan	nan	nan	nan	nan	HNSC			0.0672222			-3.89492	-3.89492			-0.637847	-0.117086	-0.117086	WT	WT	WT	WT	WT	WT	chr17_7579532-7579533_->ATG	other non-conserving	p.52_52Q>P*	WT	WT	WT	WT	WT	WT	WT	WT	WT	WT
ACH-000380	KMS12BM_HAEMATOPOIETIC_AND_LYMPHOID_TISSUE	KMS12BM_HAEMATOPOIETIC_AND_LYMPHOID_TISSUE	907281	SIDM01020	plasma_cell	64.0	female	127.15023090000001	lymphoid_neoplasm	Asian	DSMZ	Supsension	RPMI-1640+20% FBS	5% DMSO	nan	nan	Lymphoma:Multiple_Myeloma	MM		0.0302974	0.11268		-5.04466	-3.1497	-3.1497		0.368664	0.00331613	0.680251	0.680251	WT	WT	WT	WT	WT	WT	chr17_7574017-7574017_C>A	other non-conserving	p.R337L	WT	WT	WT	WT	WT	WT	WT	WT	WT	chr17_8138434-8138434_T>C
ACH-000857	CAL851_BREAST	CAL851_BREAST	910852	SIDM00928	breast	35.0	female	176.84322450000002	carcinoma	Caucasian	DSMZ	nan	DMEM+10% FBS	5% DMSO	nan	58.4	Breast:Carcinoma	BRCA	3.08863		0.203074	1.62697		-2.29992	-3.68729	0.0645912		0.734433	0.105064	0.0848277	WT	WT	WT	WT	WT	WT	chr17_7578536-7578536_T>C	other non-conserving	p.K132E	WT	WT	WT	WT	WT	WT	WT	WT	WT	WT
ACH-000095	D341MED_CENTRAL_NERVOUS_SYSTEM			nan	central_nervous_system	3.5	male	86.33349346	primitive_neuroectodermal_tumour-medulloblastoma	Caucasian	NIBRI	nan	nan	nan	nan	472.8	CNS:Medulloblastoma	MB													WT	WT	WT	WT	WT	WT	WT	WT	WT	WT	WT	WT	WT	WT	WT	WT	WT	WT	WT
ACH-000690	HCC2814_LUNG			nan	lung	nan	nan	136.4879764	carcinoma	Caucasian	nan	nan	nan	nan	nan	nan	nan	nan													WT	WT	WT	WT	WT	WT	chr17_7578398-7578398_G>-,chr17_7578402-7578402_G>C	damaging,other non-conserving	p.H179fs,p.C176W	WT	WT	WT	WT	WT	WT	WT	WT	WT	WT
ACH-000628	NCIH596_LUNG	NCIH596_LUNG	908459	SIDM01127	lung	73.0	male	130.0234562	carcinoma	Caucasian	ATCC	adherent	RPMI-1640+10% FBS	5% DMSO	nan	156.9	Lung:NSCLC_Adeno	LUAD	1.94784		0.109125	0.961873		-3.19595	-4.58331	-0.627037		-0.0364756	-0.853621	-0.740329	WT	WT	WT	WT	WT	WT	chr17_7577548-7577548_C>A	other non-conserving	p.G245C	WT	WT	WT	WT	WT	WT	WT	WT	WT	WT
ACH-000103	CAOV4_OVARY	CAOV4_OVARY	949090	SIDM00918	ovary	45.0	female	77.29245748	carcinoma	Caucasian	nan	Adherent	nan	5%DMSO	nan	nan	nan	OV			0.0528521			-4.2419	-4.2419			-0.936375	-0.488328	-0.488328	WT	WT	WT	WT	WT	WT	chr17_7578490-7578490_A>T	other non-conserving	p.V147D	WT	WT	WT	WT	WT	WT	WT	WT	WT	WT
ACH-000905	5637_URINARY_TRACT	5637_URINARY_TRACT	687452	SIDM00807	urinary_tract	68.0	male	278.01957789999994	carcinoma	Asian	nan	adherent	RPMI1640+10%FBS	5%DMSO	nan	60.9	Bladder:Carcinoma	BLCA	1.07851		0.0298571	0.109044		-5.06578	-5.06578	-1.51389		-1.64522	-1.36983	-1.44186	WT	WT	WT	WT	WT	WT	chr17_7577099-7577099_C>G	other non-conserving	p.R280T	WT	WT	WT	WT	WT	WT	WT	WT	WT	WT
ACH-000061	HH_HAEMATOPOIETIC_AND_LYMPHOID_TISSUE	HH_HAEMATOPOIETIC_AND_LYMPHOID_TISSUE	907056	SIDM00671	lymphocyte	61.0	male	79.63113609	lymphoid_neoplasm	Caucasian	NIBRI	nan	nan	nan	nan	nan	Leukemia:ALL	ALL			0.0457576			-4.44984	-4.44984			-1.11529	-0.710819	-0.710819	WT	WT	WT	WT	WT	WT	chr17_7578290-7578290_C>T	damaging	nan	WT	WT	WT	WT	WT	WT	WT	WT	WT	WT
ACH-000578	HCC1171_LUNG			nan	lung	58.0	male	125.157705	carcinoma	Caucasian	KCLB	epithelial; monolayer	RPMI 1640 with L-glutamine (300mg/L), 90%; heat inactivated fetal bovine serum (FBS),10%	nan	nan	nan	Lung:NSCLC_Others	nan													chrX_76939673-76939674_->T	damaging	p.L359fs	WT	WT	WT	chr17_7577541-7577541_T>A	other non-conserving	p.N247I	WT	WT	WT	WT	WT	WT	WT	WT	WT	WT
ACH-000307	PK1_PANCREAS			nan	pancreas	nan	nan	149.15049630000001	carcinoma	Asian	RIKEN	Adherent	RPMI 1640 +10%FBS	5% DMSO	nan	58.2	Pancreas:Carcinoma	PAAD		0.0196732			-5.66763				-0.913751				WT	WT	WT	WT	WT	WT	chr17_7577570-7577570_C>T	other non-conserving	p.M237I	WT	WT	WT	WT	WT	WT	WT	WT	WT	WT
ACH-002462	RPE1SS48_ENGINEERED			nan	engineered																										WT	WT	WT	WT	WT	WT	WT	WT	WT	WT	WT	WT	WT	WT	WT	WT	WT	WT	WT
ACH-002066	HSSCH2_CENTRAL_NERVOUS_SYSTEM			nan	central_nervous_system																										WT	WT	WT	WT	WT	WT	chr17_7577120-7577120_C>T	other non-conserving	p.R273H	WT	WT	WT	WT	WT	WT	WT	WT	WT	chr17_8138085-8138085_A>G
ACH-000871	NCIH510_LUNG	NCIH510_LUNG	753605	SIDM00927	lung	56.0	male	259.73186499999997	carcinoma	Caucasian	ATCC	mixed line	F-12K ATCC + 10% FBS	5% DMSO	nan	979.0	Lung:SCLC	SCLC	11.0582		0.486413	3.46704		-1.03975	-2.42711	1.97808		1.81865	1.45337	1.71572	WT	WT	WT	WT	WT	WT	chr17_7577094-7577094_G>C	other non-conserving	p.R282G	chr3_10183822-10183822_C>T	silent	p.P97P	WT	WT	WT	WT	WT	WT	WT
ACH-000021	NCIH1693_LUNG	NCIH1693_LUNG	687802	SIDM00742	lung	55.0	female	103.8152089	carcinoma	Caucasian	ATCC	Adherent	RPMI1640+5%FBS	10%DMSO	nan	94.7	Lung:NSCLC_Adeno	LUAD	2.50975		0.147944	1.32754		-2.75688	-4.14424	-0.246781		0.341285	-0.383846	-0.315313	WT	WT	WT	WT	WT	WT	chr17_7576852-7576852_C>A	damaging	nan	WT	WT	WT	WT	WT	WT	WT	WT	WT	WT
ACH-000699	HCC1395_BREAST	HCC1395_BREAST	749712	SIDM00884	breast	43.0	female	131.1519698	carcinoma	Caucasian	ATCC	ADHERENT EPITHELIAL	RPMI-10% FBS	5% DMSO	nan	107.3	Breast:Carcinoma	BRCA		0.0214491	0.0753737		-5.54294	-3.72979	-3.72979		-0.657068	-0.495781	0.0595854	0.0595854	chrX_76937225-76937225_T>C	other non-conserving	p.K1175E	WT	WT	WT	chr17_7578406-7578406_C>T	other non-conserving	p.R175H	WT	WT	WT	WT	WT	WT	WT	WT	WT	WT
ACH-000817	RPMI8226_HAEMATOPOIETIC_AND_LYMPHOID_TISSUE	RPMI8226_HAEMATOPOIETIC_AND_LYMPHOID_TISSUE	905964	SIDM00087	plasma_cell	61.0	male	169.3069282	lymphoid_neoplasm	African_american	ATCC	Lymphoblast, suspension	RPMI-1640+ 10% FBS	5% DMSO	nan	76.6	Lymphoma:Multiple_Myeloma	MM	0.973146		0.0437834	-0.0392721		-4.51347	-4.51347	-1.66812		-1.17003	-0.778896	-1.22351	WT	WT	WT	WT	WT	WT	chr17_7577085-7577085_C>T	other non-conserving	p.E285K	WT	WT	WT	WT	WT	WT	WT	WT	WT	WT
ACH-001610	NP5_CENTRAL_NERVOUS_SYSTEM			nan	central_nervous_system																										chrX_76849194-76849194_G>A	damaging	p.R2028*	WT	WT	WT	chr17_7577121-7577121_G>A,chr17_7578406-7578406_C>T	other non-conserving,other non-conserving	p.R273C,p.R175H	chr3_10183765-10183765_T>A	other non-conserving	p.N78K	WT	WT	WT	WT	WT	WT	chr17_8141755-8141755_G>A
ACH-002038	HSKTC_OVARY			nan	ovary																										WT	WT	WT	WT	WT	WT	chr17_7579409-7579410_AG>-	damaging	p.L93fs	WT	WT	WT	WT	WT	WT	WT	WT	WT	WT
ACH-002113	EW13_BONE	EW13_BONE	949166	SIDM00621	bone	nan	nan	nan	nan	nan	nan	nan	nan	nan	nan	nan	nan	nan			0.238562			-2.06756	-3.45493			0.934346	0.353672	0.353672	WT	WT	WT	WT	WT	WT	chr17_7576904-7576904_G>-,chr17_7578388-7578388_C>T	damaging,other non-conserving	p.S315fs,p.R181H	WT	WT	WT	WT	WT	WT	WT	WT	WT	WT
ACH-000574	FUOV1_OVARY	FUOV1_OVARY	1240129	SIDM01040	ovary	65.0	female	168.063347	carcinoma	Asian	NIBRI	nan	nan	nan	nan	nan	Ovary:Carcinoma	OV	3.53037		0.116079	1.81982		-3.10682	-4.49419	0.265138		0.0402048	-0.758263	-0.246562	WT	WT	WT	WT	WT	WT	chr17_7578395-7578395_G>C	other non-conserving	p.H179D	WT	WT	WT	WT	WT	WT	WT	WT	WT	WT
ACH-000789	NCIH810_LUNG	NCIH810_LUNG	925341	SIDM01116	lung	51.0	male	172.25007730000002	carcinoma	African_american	GNF	nan	nan	nan	nan	nan	Lung:NSCLC_Large_Cell	nan			0.168548			-2.56877	-3.95613			0.503127	-0.182583	-0.182583	WT	WT	WT	WT	WT	WT	chr17_7577058-7577059_CC>AG,chr17_7577059-7577059_C>G	damaging,silent	p.E294*,p.G293G	WT	WT	WT	WT	WT	WT	WT	WT	WT	WT
ACH-002234	DOK_UPPER_AERODIGESTIVE_TRACT	DOK_UPPER_AERODIGESTIVE_TRACT	910936	SIDM00540	upper_aerodigestive	nan	nan	nan	nan	nan	nan	nan	nan	nan	nan	nan	nan	HNSC			0.026984			-5.21175	-5.21175			-1.77081	-1.52601	-1.52601	WT	WT	WT	WT	WT	WT	chr17_7578275-7578286_GAGGAGGGGCCA>-	other non-conserving	p.LAPP188del	WT	WT	WT	WT	WT	WT	WT	WT	WT	WT
ACH-000073	GRANTA519_HAEMATOPOIETIC_AND_LYMPHOID_TISSUE	GRANTA519_HAEMATOPOIETIC_AND_LYMPHOID_TISSUE	1303897	SIDM01058	lymphocyte	58.0	female	73.86512393	lymphoid_neoplasm	Caucasian	DSMZ	spheroid cells growing in suspention, singly or in clumps	90% Dulbecco's MEM(4.5 g/L glucose) +10% h.i.FBS	nan	~ 49 hrs	nan	Lymphoma:NH_B_cell	DLBC		0.0216415	0.0834409		-5.53006	-3.5831	-3.5831		-0.630554	-0.369571	0.216538	0.216538	WT	WT	WT	WT	WT	WT	WT	WT	WT	WT	WT	WT	WT	WT	WT	WT	WT	WT	WT
ACH-002381	HCC2157_MATCHED_NORMAL_TISSUE	HCC2157_Matched_Normal_Tissue		SIDM00773	non_cancerous																0.0634885			-3.97736	-3.97736			-0.708778	-0.205293	-0.205293	WT	WT	WT	WT	WT	WT	WT	WT	WT	WT	WT	WT	WT	WT	WT	WT	WT	WT	WT
ACH-002466	RPE1SS111_ENGINEERED			nan	engineered																										WT	WT	WT	WT	WT	WT	WT	WT	WT	WT	WT	WT	WT	WT	WT	WT	WT	WT	WT
ACH-000907	SNU349_KIDNEY			nan	kidney	68.0	male	337.66378149999997	carcinoma	Asian	KCLB	epithelial adherent	RPMI+10%FBS	5%DMSO	120hrs	46.5	Kidney:Carcinoma	KIRC		0.0178086			-5.81128				-1.20947				WT	WT	WT	WT	WT	WT	chr17_7577576-7577578_GTT>-	other non-conserving	p.N235del	chr3_10183755-10183770_TCTTCTGCAATCGCAG>-	damaging	p.IFCNRS75fs	WT	WT	WT	WT	WT	WT	chr17_8137916-8137918_CTT>-
ACH-000463	NCIH460_LUNG	NCIH460_LUNG	905943	SIDM00144	lung	nan	male	119.6353574	carcinoma	Caucasian	ATCC	Adherent	RPMI-1640+10%FBS	5% DMSO	nan	25.5	Lung:NSCLC_Large_Cell	nan	2.99862		0.123749	1.5843		-3.01451	-4.40188	0.0202185		0.119625	-0.659498	-0.31964	WT	WT	WT	WT	WT	WT	WT	WT	WT	WT	WT	WT	WT	WT	WT	WT	WT	WT	WT
ACH-001670	TASK1_CENTRAL_NERVOUS_SYSTEM	TASK1_BONE		SIDM00026	peripheral_nervous_system	nan	nan	nan	nan	nan	nan	nan	nan	nan	nan	nan	nan	nan			0.0652485			-3.93791	-3.93791			-0.674837	-0.163085	-0.163085	WT	WT	WT	WT	WT	WT	chr17_7577121-7577121_G>A	other non-conserving	p.R273C	WT	WT	WT	WT	WT	WT	WT	WT	WT	WT
ACH-000246	SLR23_KIDNEY			nan	kidney	nan	nan	nan	carcinoma	Caucasian	nan	nan	nan	nan	nan	nan	nan	KIRC													WT	WT	WT	WT	WT	WT	chr17_7578457-7578457_C>T	other non-conserving	p.R158H	chr3_10183794-10183794_G>A	damaging	p.W88*	WT	WT	WT	WT	WT	WT	WT
ACH-000619	PECAPJ15_UPPER_AERODIGESTIVE_TRACT	PECAPJ15_UPPER_AERODIGESTIVE_TRACT	1240207	SIDM00473	upper_aerodigestive	45.0	male	142.30401619999998	carcinoma	Caucasian	ECACC	nan	nan	nan	nan	nan	Upper_Aerodigestive_Tract:Carcinoma	HNSC			0.14324			-2.80349	-4.19086			0.301177	-0.433723	-0.433723	WT	WT	WT	WT	WT	WT	chr17_7577538-7577538_C>T	other non-conserving	nan	WT	WT	WT	WT	WT	WT	WT	WT	WT	WT
ACH-000089	NCIH684_LARGE_INTESTINE			nan	colorectal	55.0	nan	74.74545221	other	Caucasian	KCLB	adherent	ACL-4	nan	nan	nan	Liver:Hepatoblastoma	LIHC		0.0487033			-4.35984				1.77843				WT	WT	WT	WT	WT	WT	chr17_7577548-7577548_C>T	other non-conserving	nan	WT	WT	WT	WT	WT	WT	WT	WT	WT	WT
ACH-000879	MFE296_ENDOMETRIUM	MFE296_ENDOMETRIUM	908130	SIDM00334	uterus	68.0	female	267.7106602	carcinoma	Caucasian	nan	nan	RPM:MEM +20% FBS	nan	nan	45.07	Endometrium:Carcinoma	UCEC	2.79964	0.0227108	0.066329	1.48524	-5.46048	-3.91422	-3.91422	-0.0827872	-0.487315	-0.654451	-0.137733	-0.11026	chrX_76849249-76849249_A>G	silent	p.A2009A	WT	WT	WT	chr17_7577022-7577022_G>A,chr17_7578190-7578190_T>C	damaging,other non-conserving	p.R306*,p.Y220C	WT	WT	WT	WT	WT	WT	WT	WT	WT	chr17_8135456-8135456_G>A
ACH-000689	RH18_SOFT_TISSUE	RH18_SOFT_TISSUE	971774	SIDM00454	soft_tissue	2.0	female	138.7127299	rhabdomyosarcoma	nan	DSMZ	large transparent epitheloid cells, partially with long extentions, growing as monolayers	80% RPMI 1640 +20% h.i. FBS	nan	~ 60-70 hrs	nan	Soft_Tissue:Sarcoma_Rhabdoid	SARC			0.050337			-4.31224	-4.31224			-0.996894	-0.563588	-0.563588	WT	WT	WT	WT	WT	WT	WT	WT	WT	WT	WT	WT	WT	WT	WT	WT	WT	WT	WT
ACH-001107	KP1N_PANCREAS	KP1N_PANCREAS	1298216	SIDM00583	pancreas	69.0	male	nan	carcinoma	Caucasian	nan	nan	nan	nan	nan	nan	nan	PAAD			0.203427			-2.29742	-3.68478			0.736589	0.107745	0.107745	WT	WT	WT	WT	WT	WT	chr17_7577120-7577120_C>T	other non-conserving	p.R273H	WT	WT	WT	WT	WT	WT	WT	WT	WT	WT
ACH-000882	IGR1_SKIN	IGR1_SKIN	907169	SIDM01060	skin	42.0	male	250.68805460000002	malignant_melanoma	Caucasian	nan	Epithelial adherent	DMEM + 10% FBS	5%DMSO	nan	46.3	Skin:Melanoma	SKCM			0.165781			-2.59265	-3.98002			0.482581	-0.208134	-0.208134	WT	WT	WT	chr6_33287363-33287363_G>A	silent	p.T578T	WT	WT	WT	WT	WT	WT	WT	WT	WT	chr7_140453136-140453137_AC>TT,chr7_140453137-140453137_C>T	other non-conserving,other non-conserving	p.V600K,p.V600M	chr17_8146391-8146391_G>A
ACH-002141	HSC39_STOMACH	HSC39_STOMACH	1322224	SIDM00045	gastric	nan	nan	nan	nan	nan	nan	nan	nan	nan	nan	nan	nan	STAD			0.0629628			-3.98936	-3.98936			-0.719099	-0.218128	-0.218128	WT	WT	WT	WT	WT	WT	chr17_7577548-7577548_C>T	other non-conserving	nan	WT	WT	WT	WT	WT	WT	WT	WT	WT	WT
ACH-000787	LXF289_LUNG	LXF289_LUNG	753592	SIDM00339	lung	63.0	male	187.3366314	carcinoma	Caucasian	DSMZ	adherent epithelial-like growing as monolayer	Hams F10+10% FBS	5%DMSO	50 hrs	63.2	Lung:NSCLC_Adeno	LUAD			0.432334			-1.20978	-2.59715			1.67235	1.27144	1.27144	WT	WT	WT	WT	WT	WT	chr17_7577539-7577539_G>A	other non-conserving	p.R248W	WT	WT	WT	WT	WT	WT	WT	WT	WT	WT
ACH-000026	253JBV_URINARY_TRACT			nan	urinary_tract	nan	nan	145.66584730000002	carcinoma	Caucasian	nan	Adherent epithelial	DMEM + 10% FBS	5%DMSO	nan	nan	Bladder:Carcinoma	BLCA		0.0217339			-5.52391				-0.617902				WT	WT	WT	WT	WT	WT	WT	WT	WT	WT	WT	WT	WT	WT	WT	WT	WT	WT	chr17_8136270-8136270_C>T
ACH-000924	NCIH2172_LUNG	NCIH2172_LUNG	1298353	SIDM00926	lung	nan	female	395.8472824	carcinoma	African_american	ATCC	Adherent	RPMI+10%FBS	5% DMSO	nan	55.0	Lung:NSCLC_Others	UNABLE TO CLASSIFY		0.0330264	0.194083		-4.92024	-2.36525	-2.36525		0.62481	0.678224	1.51955	1.51955	WT	WT	WT	WT	WT	WT	chr17_7579471-7579471_G>-	damaging	p.P72fs	WT	WT	WT	WT	WT	WT	WT	WT	WT	WT
ACH-000262	UOK101_KIDNEY			nan	kidney	nan	female	92.03767299	carcinoma	Caucasian	nan	nan	nan	nan	nan	nan	nan	KIRC													WT	WT	WT	WT	WT	WT	WT	WT	WT	chr3_10191477-10191477_C>-	damaging	p.T157fs	WT	WT	WT	WT	WT	WT	WT
ACH-001054	D458_CENTRAL_NERVOUS_SYSTEM			nan	central_nervous_system	nan	nan	nan	nan	nan	nan	nan	nan	nan	nan	nan	nan	nan													WT	WT	WT	WT	WT	WT	WT	WT	WT	WT	WT	WT	WT	WT	WT	WT	WT	WT	WT
ACH-000981	DND41_HAEMATOPOIETIC_AND_LYMPHOID_TISSUE	DND41_HAEMATOPOIETIC_AND_LYMPHOID_TISSUE	1297446	SIDM00946	blood	13.0	male	723.5425088	lymphoid_neoplasm	Caucasian	DSMZ	round cells growing singl or, occasionally, in clumps	90%RPMI 1640+ 10% h.i. FBS	nan	~ 35 hrs	139.1	Leukemia:ALL	ALL		0.127355	0.303852		-2.97308	-1.71856	-1.71856		4.63319	1.23462	2.21147	2.21147	WT	WT	WT	chr6_33287529-33287529_T>C	other non-conserving	p.N523S	chr17_7577036-7577036_G>-,chr17_7577538-7577538_C>T	damaging,other non-conserving	p.P301fs,nan	WT	WT	WT	chr2_209104683-209104683_C>G	other non-conserving	p.D299H	WT	WT	WT	WT
ACH-000421	SW837_LARGE_INTESTINE	SW837_LARGE_INTESTINE	909755	SIDM00833	colorectal	53.0	male	98.94407367	carcinoma	Caucasian	ATCC	Epithelial Adherent	RPMI1640+10%FBS	5%DMSO	nan	38.0	Colorectal:Carcinoma	COAD/READ			0.193035			-2.37307	-3.76043			0.671503	0.026806	0.026806	WT	WT	WT	WT	WT	WT	chr17_7577539-7577539_G>A	other non-conserving	p.R248W	WT	WT	WT	WT	WT	WT	WT	WT	WT	WT
ACH-001551	MCC142_SKIN			nan	skin																										WT	WT	WT	WT	WT	WT	chr17_7577123-7577123_A>T	other non-conserving	p.V272E	WT	WT	WT	WT	WT	WT	WT	WT	WT	WT
ACH-002001	A375_SKIN_CJ1_RESISTANT			nan	skin																										WT	WT	WT	WT	WT	WT	WT	WT	WT	WT	WT	WT	WT	WT	WT	chr7_140453136-140453136_A>T	other non-conserving	p.V600E	WT
ACH-000843	HARA_LUNG	HARA_LUNG	1240142	SIDM00598	lung	57.0	male	233.5534525	carcinoma	Asian	HSRRB	ADHERENT; fast grower	RPMI-1640+10% FBS	5% DMSO	nan	63.7	Lung:NSCLC_Squamous	LUSC	4.48017		0.221199	2.16355		-2.17658	-3.56395	0.622585		0.84055	0.237029	0.429807	WT	WT	WT	chr6_33288635-33288635_C>A	other non-conserving	p.R306L	chr17_7578502-7578502_A>G	other non-conserving	p.V143A	WT	WT	WT	WT	WT	WT	WT	WT	WT	WT
ACH-002297	PCI4B_UPPER_AERODIGESTIVE_TRACT	PCI4B_UPPER_AERODIGESTIVE_TRACT	1298531	SIDM00043	upper_aerodigestive	nan	nan	nan	nan	nan	nan	nan	nan	nan	nan	nan	nan	HNSC			0.0607906			-4.04001	-4.04001			-0.762677	-0.272322	-0.272322	WT	WT	WT	WT	WT	WT	chr17_7573010-7573010_T>A,chr17_7573959-7573959_C>T,chr17_7578406-7578406_C>T,chr17_7579709-7579710_->T	damaging,silent,other non-conserving,damaging	nan,p.G356G,p.R175H,p.N29fs	WT	WT	WT	WT	WT	WT	WT	WT	WT	WT
ACH-001519	HEMCSS_BONE	HEMCSS_BONE	907290	SIDM00535	bone	nan	nan	nan	nan	nan	nan	nan	nan	nan	nan	nan	nan	nan			0.137828			-2.85906	-2.85906			0.253371	0.991214	0.991214	WT	WT	WT	WT	WT	WT	WT	WT	WT	WT	WT	WT	WT	WT	WT	WT	WT	WT	WT
ACH-000537	SNU761_LIVER			nan	liver	49.0	male	174.4659694	carcinoma	Asian	KCLB	polygonal; monolayer	RPMI 1640 with L-glutamine (300mg/L), 90%; heat inactivated fetal bovine serum (FBS),10%	nan	24 hrs	nan	Liver:HCC	LIHC		0.0363521			-4.78182				0.909755				WT	WT	WT	WT	WT	WT	chr17_7576878-7576909_AGTGGTTTCTTCTTTGGCTGGGGAGAGGAGCT>-	damaging	p.SSSPQPKKKPL313fs	WT	WT	WT	WT	WT	WT	WT	WT	WT	WT
ACH-002256	KARPAS45_HAEMATOPOIETIC_AND_LYMPHOID_TISSUE	KARPAS45_HAEMATOPOIETIC_AND_LYMPHOID_TISSUE	907272	SIDM01007	leukemia	nan	nan	nan	nan	nan	nan	nan	nan	nan	nan	nan	nan	ALL			0.85626			-0.223879	-1.61125			2.52059	2.32629	2.32629	WT	WT	WT	WT	WT	WT	chr17_7577121-7577121_G>A,chr17_7578282-7578282_G>A,chr17_7578406-7578406_C>T,chr17_7579313-7579313_G>A	other non-conserving,silent,other non-conserving,damaging	p.R273C,p.A189A,p.R175H,p.T125M	WT	WT	WT	WT	WT	WT	WT	WT	WT	chr17_8133962-8133962_C>A,chr17_8141736-8141736_C>T
ACH-001741	RMS13_SOFT_TISSUE			nan	soft_tissue
ACH-001383	PWR1E_PROSTATE	PWR1E_PROSTATE	1330993	SIDM01114	non_cancerous	nan	nan	nan	nan	nan	nan	nan	nan	nan	nan	nan	nan	PRAD			0.0595564			-4.0696	-4.0696			-0.788137	-0.303983	-0.303983	WT	WT	WT	WT	WT	WT	WT	WT	WT	WT	WT	WT	WT	WT	WT	WT	WT	WT	WT
ACH-001301	COGN278_AUTONOMIC_GANGLIA			nan	peripheral_nervous_system																										WT	WT	WT	WT	WT	WT	WT	WT	WT	WT	WT	WT	WT	WT	WT	WT	WT	WT	WT
ACH-000652	SUIT2_PANCREAS	SUIT2_PANCREAS	1240219	SIDM00371	pancreas	73.0	male	189.3621976	carcinoma	Asian	HSSRB	adherent epithelial-like	EMEM+10% FBS	5% DMSO	38.2 hrs	40.6	Pancreas:Carcinoma	PAAD	3.81201		0.198038	1.93055		-2.33615	-3.72352	0.380287		0.703263	0.0663024	0.223295	WT	WT	WT	WT	WT	WT	chr17_7577120-7577120_C>T	other non-conserving	p.R273H	WT	WT	WT	WT	WT	WT	WT	WT	WT	WT
ACH-000883	SW1783_CENTRAL_NERVOUS_SYSTEM	SW1783_CENTRAL_NERVOUS_SYSTEM	909750	SIDM01164	central_nervous_system	68.0	male	273.8360546	glioma	Caucasian	NIBRI	nan	nan	nan	nan	nan	CNS:Glioma_HighGrade	LGG	1.54838		0.0885977	0.630758		-3.49659	-4.88395	-0.971361		-0.295136	-1.17529	-1.07332	WT	WT	WT	WT	WT	WT	chr17_7577120-7577121_CG>TA,chr17_7577121-7577121_G>A	other non-conserving,other non-conserving	p.R273Y,p.R273C	WT	WT	WT	WT	WT	WT	WT	WT	WT	WT
ACH-002337	JHU028_LUNG			SIDM00902	lung																										WT	WT	WT	WT	WT	WT	WT	WT	WT	WT	WT	WT	WT	WT	WT	WT	WT	WT	WT
ACH-001126	MOGGUVW_CENTRAL_NERVOUS_SYSTEM	MOGGUVW_CENTRAL_NERVOUS_SYSTEM	908145	SIDM00504	central_nervous_system	nan	nan	nan	glioma	Caucasian	nan	nan	nan	nan	nan	nan	nan	LGG			0.0355698			-4.8132	-4.8132			-1.42791	-1.09959	-1.09959	WT	WT	WT	WT	WT	WT	chr17_7579358-7579358_C>G	other non-conserving	p.R110P	WT	WT	WT	WT	WT	WT	WT	WT	WT	WT
ACH-000014	HS294T_SKIN			SIDM00800	skin	56.0	male	73.81343009	malignant_melanoma	Caucasian	ATCC	Adherent	DMEM +10%FBS	5%DMSO	nan	67.5	Skin:Melanoma	SKCM	4.28943			2.10079				0.557312				0.557312	WT	WT	WT	WT	WT	WT	chr17_7577098-7577098_T>A	other non-conserving	p.R280S	WT	WT	WT	WT	WT	WT	chr7_140453136-140453136_A>T	other non-conserving	p.V600E	WT
ACH-000563	EBC1_LUNG	EBC1_LUNG	753554	SIDM00486	lung	69.0	male	161.35927019999997	carcinoma	Asian	RIKEN	ADHERENT, EPITHIAL-LIKE	MEM+10%FBS	5% DMSO	nan	80.5	Lung:NSCLC_Squamous	LUSC	1.55521		0.0489167	0.637108		-4.35353	-4.35353	-0.964758		-1.03242	-0.607768	-0.786263	WT	WT	WT	WT	WT	WT	chr17_7578419-7578419_C>A	damaging	p.E171*	WT	WT	WT	WT	WT	WT	WT	WT	WT	WT
ACH-000134	HS274T_FIBROBLAST			nan	fibroblast	66.0	female	nan	carcinoma	Caucasian	ATCC	Supsension	DMEM + 10% FBS	5% DMSO	nan	nan	nan	nan		0.0300058			-5.05861				0.339951				WT	WT	WT	WT	WT	WT	WT	WT	WT	WT	WT	WT	WT	WT	WT	WT	WT	WT	WT
ACH-002018	OMM25_UVEA			nan	eye																										WT	WT	WT	WT	WT	WT	WT	WT	WT	WT	WT	WT	WT	WT	WT	WT	WT	WT	WT
ACH-000597	TTC709_SOFT_TISSUE			nan	soft_tissue	nan	nan	nan	nan	nan	nan	nan	nan	nan	nan	nan	nan	nan													WT	WT	WT	WT	WT	WT	WT	WT	WT	WT	WT	WT	WT	WT	WT	WT	WT	WT	WT
ACH-002105	ES4_BONE	ES4_BONE	949156	SIDM00264	bone	nan	nan	nan	nan	nan	nan	nan	nan	nan	nan	nan	nan	nan			0.173114			-2.53021	-3.91757			0.536305	-0.141323	-0.141323	WT	WT	WT	WT	WT	WT	WT	WT	WT	WT	WT	WT	WT	WT	WT	WT	WT	WT	WT
ACH-001208	TK10_KIDNEY	TK10_KIDNEY	905980	SIDM00113	kidney	nan	nan	nan	nan	nan	Garraway Lab	Adherent	RPMI-1640+ 5% FBS	5% DMSO	nan	38.9	nan	KIRC			0.0389871			-4.68086	-4.68086			-1.31404	-0.957989	-0.957989	WT	WT	WT	WT	WT	WT	chr17_7577147-7577147_A>C	other non-conserving	p.L264R	WT	WT	WT	WT	WT	WT	WT	WT	WT	WT
ACH-000615	SKMEL28_SKIN	SKMEL28_SKIN	905954	SIDM00081	skin	51.0	male	124.58887709999999	malignant_melanoma	Caucasian	NIBRI	nan	nan	nan	nan	nan	Skin:Melanoma	SKCM			0.69023			-0.534851	-1.92222			2.25304	1.99357	1.99357	WT	WT	WT	WT	WT	WT	chr17_7578495-7578496_CA>AC,chr17_7578496-7578496_A>C	other non-conserving,other non-conserving	p.L145R,p.L145R	WT	WT	WT	WT	WT	WT	chr7_140453136-140453136_A>T	other non-conserving	p.V600E	WT
ACH-000003	CACO2_LARGE_INTESTINE			SIDM00891	colorectal	nan	nan	nan	nan	nan	nan	nan	nan	nan	nan	nan	nan	COAD/READ													WT	WT	WT	WT	WT	WT	chr17_7578239-7578239_C>A	damaging	p.E204*	WT	WT	WT	WT	WT	WT	WT	WT	WT	WT
ACH-000701	RMUGS_OVARY			nan	ovary	62.0	female	178.91659280000002	carcinoma	Asian	NIBRI	nan	nan	nan	nan	nan	Ovary:Carcinoma	OV		0.0335257			-4.89859				0.669371				WT	WT	WT	WT	WT	WT	chr17_7573987-7573987_G>A	other non-conserving	p.A347V	WT	WT	WT	WT	WT	WT	WT	WT	WT	WT
ACH-000909	JHUEM2_ENDOMETRIUM			nan	uterus	62.0	female	353.05983760000004	carcinoma	Asian	GNF	nan	nan	nan	nan	nan	Endometrium:Carcinoma	UCEC		0.0309862			-5.01223				0.435437				WT	WT	WT	WT	WT	WT	WT	WT	WT	WT	WT	WT	WT	WT	WT	WT	WT	WT	chr17_8132625-8132625_G>A
ACH-000842	SW480_LARGE_INTESTINE			SIDM00840	colorectal	50.0	male	240.1277804	carcinoma	Caucasian	ATCC	Epithelial adherent	L15+10%FBS	5%DMSO	nan	56.4	Colorectal:Carcinoma	COAD/READ	2.1323			1.09241				-0.491288				-0.491288	WT	WT	WT	WT	WT	WT	chr17_7576921-7576921_G>A,chr17_7577120-7577120_C>T	other non-conserving,other non-conserving	p.P309S,p.R273H	WT	WT	WT	WT	WT	WT	WT	WT	WT	WT
ACH-000894	NCIH1869_LUNG	NCIH1869_LUNG	1240183	SIDM00768	lung	58.0	male	425.9997682	carcinoma	Caucasian	ATCC	Adherent	RPMI 1640+10%FBS	5%DMSO	nan	207.3	Lung:NSCLC_Squamous	LUSC	1.60691		0.0989114	0.68429		-3.33772	-4.72509	-0.915693		-0.158452	-1.00531	-0.960501	WT	WT	WT	WT	WT	WT	chr17_7577570-7577570_C>T	other non-conserving	p.M237I	WT	WT	WT	WT	WT	WT	WT	WT	WT	WT
ACH-000076	NCO2_HAEMATOPOIETIC_AND_LYMPHOID_TISSUE			nan	blood	35.0	female	110.6743889	haematopoietic_neoplasm	Asian	HSSRB	nan	nan	nan	nan	nan	Leukemia:CML	LCML		0.029645			-5.07607				0.304022				WT	WT	WT	WT	WT	WT	chr17_7577142-7577142_C>G	other non-conserving	p.G266R	WT	WT	WT	WT	WT	WT	WT	WT	WT	WT
ACH-000194	HS934T_FIBROBLAST			nan	fibroblast	58.0	female	104.7757336	malignant_melanoma	Caucasian	ATCC	Adherent	DMEM +10 %FBS	5%DMSO	nan	149.9	Skin:Melanoma	SKCM													WT	WT	WT	WT	WT	WT	WT	WT	WT	WT	WT	WT	WT	WT	WT	WT	WT	WT	WT
ACH-002065	HSPSS_CENTRAL_NERVOUS_SYSTEM			nan	central_nervous_system																										WT	WT	WT	WT	WT	WT	WT	WT	WT	WT	WT	WT	WT	WT	WT	WT	WT	WT	WT
ACH-000373	SKM1_HAEMATOPOIETIC_AND_LYMPHOID_TISSUE	SKM1_HAEMATOPOIETIC_AND_LYMPHOID_TISSUE	909722	SIDM00380	blood	76.0	male	164.6000219	haematopoietic_neoplasm	Asian	HSRRB	suspension	RPMI 1640+20%FBS	5% DMSO	nan	40.0	Leukemia:AML	LAML			0.0673136			-3.89296	-3.89296			-0.636161	-0.114988	-0.114988	WT	WT	WT	WT	WT	WT	chr17_7577538-7577538_C>T	other non-conserving	nan	WT	WT	WT	WT	WT	WT	WT	WT	WT	WT
ACH-000947	OVK18_OVARY	OVK18_OVARY	1480371	SIDM00238	ovary	nan	female	545.5527089999999	carcinoma	Asian	Riken	Adherent	MEM+10% FBS	5% DMSO	nan	49.7	Ovary:Carcinoma	OV	4.21161		0.0986177	2.07437		-3.34201	-3.34201	0.529843		-0.162143	0.47449	0.502166	WT	WT	WT	chr6_33287897-33287897_T>C,chr6_33288764-33288764_C>T	silent,other non-conserving	p.E452E,p.R263H	chr17_7578475-7578475_G>-	damaging	p.P153fs	WT	WT	WT	WT	WT	WT	WT	WT	WT	WT
ACH-000018	T24_URINARY_TRACT	T24_URINARY_TRACT	724812	SIDM01184	urinary_tract	81.0	female	94.67528958	carcinoma	Caucasian	ATCC	Adherent epithelial	McCoy's 5A +10%	5%DMSO	nan	38.8	Bladder:Carcinoma	BLCA	2.01006		0.134855	1.00724		-2.89052	-4.27789	-0.579864		0.226304	-0.526834	-0.553349	WT	WT	WT	chr6_33288304-33288304_G>A	silent	p.A368A	chr17_7578552-7578552_G>C	damaging	p.Y126*	WT	WT	WT	WT	WT	WT	WT	WT	WT	WT
ACH-000121	NCIH2405_LUNG	NCIH2405_LUNG	687821	SIDM00724	lung	47.0	male	99.09336648	carcinoma	Caucasian	nan	nan	nan	nan	nan	nan	Lung:NSCLC_Adeno	LUAD			0.208331			-2.26305	-3.65042			0.766156	0.144515	0.144515	WT	WT	WT	WT	WT	WT	chr17_7577120-7577120_C>T	other non-conserving	p.R273H	WT	WT	WT	WT	WT	WT	chr7_140477839-140477853_GGTGCTGTCACATTC>-,chr7_140477842-140477854_GCTGTCACATTCA>-	other non-conserving,damaging	p.485_490LNVTAP>F,p.LNVTA485fs	WT
ACH-002332	GISTT1_STOMACH			nan	colorectal
ACH-000365	SUDHL4_HAEMATOPOIETIC_AND_LYMPHOID_TISSUE	SUDHL4_HAEMATOPOIETIC_AND_LYMPHOID_TISSUE	1331035	SIDM00405	lymphocyte	38.0	male	96.79794358	lymphoid_neoplasm	Caucasian	DSMZ	SUSPENSION	RPMI-1640+ 20% FBS	5% DMSO	nan	45.1	Lymphoma:NH_B_cell	DLBC		0.0432115	0.498547		-4.53244	-1.0042	-1.0042		1.42312	1.84923	2.97579	2.97579	WT	WT	WT	WT	WT	WT	chr17_7577121-7577121_G>A	other non-conserving	p.R273C	WT	WT	WT	WT	WT	WT	WT	WT	WT	WT
ACH-001015	AZ521_SMALL_INTESTINE			nan	gastric	nan	nan	nan	carcinoma	African_american	nan	nan	nan	nan	nan	nan	nan	nan
ACH-001340	COV413A_OVARY			nan	ovary																										WT	WT	WT	WT	WT	WT	chr17_7574003-7574003_G>A	damaging	p.R342*	WT	WT	WT	chr2_209103829-209103829_T>G	other non-conserving	p.K374Q	WT	WT	WT	WT
ACH-000461	SNU1196_BILIARY_TRACT			SIDM00163	bile_duct	nan	nan	120.7640014	carcinoma	Asian	KCLB	epithelial; monolayer	RPMI 1640 with L-glutamine (300mg/L), 90%; heat inactivated fetal bovine serum (FBS),10%	nan	48 hrs	nan	Biliary_Tract:Carcinoma	nan		0.0164175			-5.92862				-1.45103				WT	WT	WT	WT	WT	WT	chr17_7577121-7577121_G>A	other non-conserving	p.R273C	WT	WT	WT	WT	WT	WT	WT	WT	WT	WT
ACH-000967	SNUC2A_LARGE_INTESTINE			SIDM00780	colorectal	43.0	female	667.1912736	carcinoma	Asian	NIBRI	nan	nan	nan	nan	nan	Colorectal:Carcinoma	COAD/READ	3.29043	0.0230943		1.71828	-5.43632			0.159542	-0.437584			0.159542	chrX_76763887-76763887_C>T	other non-conserving	p.R2474H	WT	WT	WT	chr17_7577120-7577121_CG>TA,chr17_7577121-7577121_G>A,chr17_7578375-7578375_G>A	other non-conserving,other non-conserving,silent	p.R273Y,p.R273C,p.S185S	WT	WT	WT	chr2_209116263-209116263_T>-	damaging	p.I5fs	WT	WT	WT	chr17_8133714-8133714_G>-,chr17_8134705-8134705_G>A
ACH-000525	NCIH2171_LUNG	NCIH2171_LUNG	688015	SIDM00733	lung	50.0	male	123.31688570000001	carcinoma	Caucasian	ATCC	Suspension; floating clusters	DMEM:F12+5% FBS	5% DMSO	nan	86.1	Lung:SCLC	SCLC	4.3779		0.274064	2.13024		-1.86742	-3.25478	0.587941		1.10655	0.567818	0.577879	WT	WT	WT	WT	WT	WT	chr17_7578500-7578500_G>A	damaging	p.Q144*	WT	WT	WT	WT	WT	WT	WT	WT	WT	WT
ACH-000860	NCIH358_LUNG	NCIH358_LUNG	908465	SIDM00718	lung	nan	male	218.724336	carcinoma	Caucasian	ATCC	adherenet	RPMI+10%FBS	5%DMSO	nan	73.9	Lung:NSCLC_Adeno	LUAD	2.26332		0.122614	1.17844		-3.0278	-4.41517	-0.401827		0.108188	-0.67372	-0.537774	WT	WT	WT	WT	WT	WT	WT	WT	WT	WT	WT	WT	WT	WT	WT	WT	WT	WT	WT
ACH-002349	GBM001_CENTRAL_NERVOUS_SYSTEM			nan	unknown																										WT	WT	WT	WT	WT	WT	WT	WT	WT	WT	WT	WT	WT	WT	WT	WT	WT	WT	WT
ACH-000260	SKNAS_AUTONOMIC_GANGLIA	SKNAS_AUTONOMIC_GANGLIA	724828	SIDM01101	peripheral_nervous_system	6.0	female	93.765726	neuroblastoma	Caucasian	ATCC	Adherent	DMEM + 10% FBS	5%DMSO	nan	55.9	PNET:Neuroblastoma	NB	4.58209		0.337681	2.19601		-1.56627	-2.95363	0.656332		1.36565	0.890026	0.773179	WT	WT	WT	WT	WT	WT	WT	WT	WT	WT	WT	WT	WT	WT	WT	WT	WT	WT	WT
ACH-000285	TOLEDO_HAEMATOPOIETIC_AND_LYMPHOID_TISSUE			nan	lymphocyte	nan	female	88.11498549	lymphoid_neoplasm	Caucasian	ATCC	suspension, lymphoblast	RPMI-1640 + 10% FBS	5%DMSO	nan	51.4	Lymphoma:NH_B_cell	DLBC		0.024115			-5.37393				-0.309151				WT	WT	WT	WT	WT	WT	chr17_7578253-7578257_CCTTC>-,chr17_7578259-7578260_->GG	damaging,damaging	p.EG198fs,p.V197fs	WT	WT	WT	WT	WT	WT	WT	WT	WT	WT
ACH-001053	D425_CENTRAL_NERVOUS_SYSTEM			nan	central_nervous_system	nan	nan	nan	nan	nan	nan	nan	nan	nan	nan	nan	nan	nan													WT	WT	WT	WT	WT	WT	chr17_7577117-7577117_A>C,chr17_7577118-7577118_C>A	other non-conserving,other non-conserving	p.V274G,p.V274F	WT	WT	WT	WT	WT	WT	WT	WT	WT	WT
ACH-001690	UPCISCC026_UPPER_AERODIGESTIVE_TRACT			nan	upper_aerodigestive																										WT	WT	WT	WT	WT	WT	WT	WT	WT	WT	WT	WT	WT	WT	WT	WT	WT	WT	WT
ACH-000438	LU65_LUNG	LU65_LUNG	724863	SIDM00547	lung	64.0	male	139.7910668	carcinoma	Asian	JCRB	Lymphocyte like with partially attached cells	RPMI 1640+10%FBS	5% DMSO	nan	nan	Lung:NSCLC_Large_Cell	nan			0.234291			-2.09363	-3.48099			0.911923	0.325787	0.325787	WT	WT	WT	WT	WT	WT	chr17_7579312-7579312_C>A,chr17_7579882-7579882_C>G	damaging,other non-conserving	p.T125T,p.E11Q	WT	WT	WT	WT	WT	WT	WT	WT	WT	WT
ACH-000265	KP4_PANCREAS	KP4_PANCREAS	753572	SIDM00301	pancreas	50.0	male	143.110198	carcinoma	Asian	nan	adherent	IMDM+10%FBS	5%DMSO	nan	nan	Pancreas:Carcinoma	PAAD			0.092919			-3.42788	-3.42788			-0.236026	0.382611	0.382611	WT	WT	WT	WT	WT	WT	WT	WT	WT	WT	WT	WT	WT	WT	WT	WT	WT	WT	WT
ACH-001834	ICC10_BILIARY_TRACT			nan	bile_duct																										WT	WT	WT	WT	WT	WT	WT	WT	WT	WT	WT	WT	WT	WT	WT	WT	WT	WT	WT
ACH-002192	RCCMF_KIDNEY	RCCMF_KIDNEY	1524419	SIDM00816	kidney	nan	nan	nan	nan	nan	nan	nan	nan	nan	nan	nan	nan	KIRC			0.0958557			-3.38299	-3.38299			-0.197403	0.430641	0.430641	WT	WT	WT	WT	WT	WT	WT	WT	WT	chr3_10183787-10183787_C>T	other non-conserving	p.P86S	WT	WT	WT	WT	WT	WT	WT
ACH-000166	KASUMI6_HAEMATOPOIETIC_AND_LYMPHOID_TISSUE			nan	blood	64.0	male	131.64667920000002	haematopoietic_neoplasm	Asian	ATCC	suspension;dt=55hrs	RPMI-1640+20%FBS	5%DMSO	nan	142.9	Leukemia:AML	LAML		0.0325838			-4.9397				0.58474				WT	WT	WT	WT	WT	WT	chr17_7577581-7577581_A>C	other non-conserving	p.Y234D	WT	WT	WT	WT	WT	WT	WT	WT	WT	WT
ACH-000762	YD38_UPPER_AERODIGESTIVE_TRACT			nan	upper_aerodigestive	67.0	male	181.1896531	carcinoma	Asian	KCLB	epithelial; monolayer	RPMI 1640 with L-glutamine (300mg/L), 90%; heat inactivated fetal bovine serum (FBS),10%	nan	21.6 hrs	nan	Upper_Aerodigestive_Tract:Carcinoma	HNSC		0.0286297			-5.12634				0.200522				WT	WT	WT	WT	WT	WT	chr17_7578254-7578254_C>A	damaging	p.G199*	WT	WT	WT	WT	WT	WT	WT	WT	WT	WT
ACH-001000	1321N1_CENTRAL_NERVOUS_SYSTEM			nan	central_nervous_system	nan	nan	nan	glioma	Caucasian	nan	nan	nan	nan	nan	nan	nan	nan
ACH-000751	OCIM1_HAEMATOPOIETIC_AND_LYMPHOID_TISSUE	OCIM1_HAEMATOPOIETIC_AND_LYMPHOID_TISSUE	1330985	SIDM00458	blood	62.0	nan	171.07933359999998	haematopoietic_neoplasm	Caucasian	DSMZ	round cells growind singly in suspention	80-90% Iscove's MDM +10-20% h.i. FBS	nan	~ 30 hrs	nan	Leukemia:AML	LAML		0.0203499	0.0345953		-5.61883	-4.85328	-4.85328		-0.813307	-1.46239	-1.14247	-1.14247	WT	WT	WT	WT	WT	WT	chr17_7577610-7577610_T>G,chr17_7578496-7578496_A>C	damaging,other non-conserving	nan,p.L145R	WT	WT	WT	WT	WT	WT	WT	WT	WT	WT
ACH-000110	NCCSTCK140_STOMACH			nan	gastric	36.0	female	103.844001	carcinoma	Asian	RIKEN	other	DMEM + 10%FBS	nan	nan	nan	Gastric:Carcinoma	STAD		0.0195697			-5.67524				-0.929418				WT	WT	WT	WT	WT	WT	chr17_7577538-7577538_C>T	other non-conserving	nan	WT	WT	WT	WT	WT	WT	WT	WT	WT	WT
ACH-001275	SYO1_SOFT_TISSUE			nan	soft_tissue																										WT	WT	WT	WT	WT	WT	WT	WT	WT	WT	WT	WT	WT	WT	WT	WT	WT	WT	WT
ACH-000408	TE5_OESOPHAGUS	TE5_OESOPHAGUS	735784	SIDM00347	esophagus	73.0	female	132.1647346	carcinoma	Asian	Riken	Epithelial-like	RPMI+10%FBS	5%DMSO	nan	nan	Oesophagus:Carcinoma	ESCA	2.45721		0.0825948	1.29702		-3.59781	-4.98517	-0.278518		-0.382221	-1.28358	-0.78105	WT	WT	WT	WT	WT	WT	chr17_7577124-7577124_C>A	other non-conserving	p.V272L	WT	WT	WT	WT	WT	WT	WT	WT	WT	WT
ACH-000125	TO175T_FIBROBLAST			nan	fibroblast	29.0	male	74.60365229	lymphoid_neoplasm	Caucasian	GNF	nan	nan	nan	nan	nan	Lymphoma:Hodgkin	nan		0.0268819			-5.21722				0.0134415				WT	WT	WT	WT	WT	WT	WT	WT	WT	WT	WT	WT	WT	WT	WT	WT	WT	WT	WT
ACH-002222	CTV1_HAEMATOPOIETIC_AND_LYMPHOID_TISSUE	CTV1_HAEMATOPOIETIC_AND_LYMPHOID_TISSUE	753548	SIDM00951	leukemia	nan	nan	nan	nan	nan	nan	nan	nan	nan	nan	nan	nan	LAML			0.1641			-2.60735	-2.60735			0.46993	1.26052	1.26052	chrX_76939801-76939801_G>A	other non-conserving	p.S316F	WT	WT	WT	WT	WT	WT	WT	WT	WT	WT	WT	WT	WT	WT	WT	WT
ACH-000424	TC71_BONE	TC71_BONE	1240221	SIDM00419	bone	22.0	male	116.191956	Ewings_sarcoma-peripheral_primitive_neuroectodermal_tumour	Caucasian	NIBRI	nan	nan	nan	nan	nan	Bone:Sarcoma_Ewing	SARC			0.0871854			-3.51977	-3.51977			-0.315082	0.284298	0.284298	WT	WT	WT	WT	WT	WT	chr17_7578212-7578212_G>A	damaging	p.R213*	WT	WT	WT	WT	WT	WT	WT	WT	WT	WT
ACH-001523	HSC1_SKIN			nan	skin																										chrX_76849179-76849179_T>C	other non-conserving	p.I2033V	WT	WT	WT	chr17_7578413-7578413_C>A,chr17_7578526-7578526_C>A	other non-conserving,other non-conserving	p.V173L,p.C135F	WT	WT	WT	WT	WT	WT	WT	WT	WT	WT
ACH-000325	SNU620_STOMACH			nan	gastric	59.0	female	134.9948889	carcinoma	Asian	KCLB	scatlered floating; suspention	RPMI 1640 with L-glutamine (300mg/L), 90%; heat inactivated fetal bovine serum (FBS),10%	nan	nan	nan	Gastric:Carcinoma	STAD		0.0256526			-5.28475				-0.125574				WT	WT	WT	WT	WT	WT	chr17_7578546-7578571_AGGGGAGTACTGTAGGAAGAGGAAGG>-	damaging	p.PSS126fs	WT	WT	WT	WT	WT	WT	WT	WT	WT	WT
ACH-000178	HS766T_PANCREAS	HS766T_PANCREAS	1298141	SIDM00664	pancreas	46.0	male	74.11662251	carcinoma	Caucasian	NIBRI	nan	nan	nan	nan	nan	Pancreas:Carcinoma	PAAD		0.0173384	0.0516702		-5.84989	-4.27452	-4.27452		-1.28895	-0.964447	-0.523238	-0.523238	WT	WT	WT	WT	WT	WT	WT	WT	WT	WT	WT	WT	WT	WT	WT	WT	WT	WT	WT
ACH-000343	NCIH522_LUNG	NCIH522_LUNG	905944	SIDM00116	lung	60.0	male	95.03061174	carcinoma	Caucasian	GNF	nan	nan	nan	nan	nan	Lung:NSCLC_Adeno	LUAD	2.16072		0.0901706	1.11151		-3.4712	-4.85857	-0.471426		-0.273294	-1.14812	-0.809774	WT	WT	WT	WT	WT	WT	chr17_7578277-7578277_G>-	damaging	p.P191fs	WT	WT	WT	WT	WT	WT	WT	WT	WT	WT
ACH-000656	SUDHL8_HAEMATOPOIETIC_AND_LYMPHOID_TISSUE	SUDHL8_HAEMATOPOIETIC_AND_LYMPHOID_TISSUE	1331038	SIDM00423	lymphocyte	59.0	male	151.013337	lymphoid_neoplasm	Caucasian	DSMZ	round single cells growing in suspention	80% RPMI 1640 +20% h.i. FBS	nan	~ 48-72 hrs	nan	Lymphoma:NH_B_cell	DLBC		0.0372762	0.104881		-4.7456	-3.25317	-3.25317		0.984311	-0.0857129	0.569537	0.569537	WT	WT	WT	WT	WT	WT	chr17_7577536-7577536_T>C,chr17_7577581-7577581_A>T	other non-conserving,other non-conserving	p.R249G,p.Y234N	WT	WT	WT	WT	WT	WT	chr7_140453138-140453139_->GTA	other non-conserving	p.599_599T>TT	WT
ACH-000282	NCIH1755_LUNG	NCIH1755_LUNG	908475	SIDM00738	lung	65.0	female	101.87037990000002	carcinoma	Caucasian	ATCC	Mixed adherent and suspension	RPMI 1640+10%FBS	5%DMSO	nan	41.0	Lung:NSCLC_Adeno	LUAD			0.0985428			-3.34311	-4.73047			-0.163086	-1.01107	-1.01107	WT	WT	WT	WT	WT	WT	chr17_7577556-7577556_C>A	other non-conserving	p.C242F	WT	WT	WT	WT	WT	WT	chr7_140481402-140481402_C>G	other non-conserving	p.G469A	WT
ACH-002344	BB65EBV_MATCHED_NORMAL_TISSUE	BB65EBV_Matched_Normal_Tissue		nan	non_cancerous																0.119969			-3.05927	-3.05927			0.0811192	0.777006	0.777006	WT	WT	WT	WT	WT	WT	WT	WT	WT	WT	WT	WT	WT	WT	WT	WT	WT	WT	WT
ACH-000037	S117_THYROID	S117_SOFT_TISSUE		SIDM00035	soft_tissue	47.0	female	70.22262185	sarcoma	Caucasian	DSMZ	Epithelial monolayer	RPMI+10%FBS	10%DMSO	nan	107.6	Soft_Tissue:Sarcoma_Others	SARC			0.0444339			-4.4922	-4.4922			-1.15172	-0.756132	-0.756132	WT	WT	WT	WT	WT	WT	chr17_7576870-7576870_C>A	damaging	p.E326*	WT	WT	WT	WT	WT	WT	WT	WT	WT	WT
ACH-000590	NCIH2073_LUNG			SIDM00757	lung	47.0	female	121.50582450000002	carcinoma	Caucasian	ATCC	adherent epithelial	RPMI-1640 + 10% FBS	5%DMSO	nan	152.5	Lung:NSCLC_Adeno	LUAD		0.0197129			-5.66472				-0.907762				WT	WT	WT	WT	WT	WT	chr17_7577555-7577555_G>C	other non-conserving	p.C242W	WT	WT	WT	WT	WT	WT	WT	WT	WT	WT
ACH-000686	SNU878_LIVER			nan	liver	54.0	female	184.93125080000002	carcinoma	Asian	KCLB	Epithelial monolayer	RPMI+10%FBS	?	25 hrs	150.3	Liver:HCC	LIHC		0.0236369			-5.40281				-0.368616				WT	WT	WT	WT	WT	WT	chr17_7577529-7577529_A>T	other non-conserving	p.I251N	WT	WT	WT	WT	WT	WT	WT	WT	WT	WT
ACH-002168	NCC021_KIDNEY	NCC021_KIDNEY	1509074	SIDM00232	kidney	nan	nan	nan	nan	nan	nan	nan	nan	nan	nan	nan	nan	KIRC			0.0613779			-4.02614	-4.02614			-0.750743	-0.257481	-0.257481	WT	WT	WT	WT	WT	WT	chr17_7577018-7577018_C>T	damaging	nan	chr3_10183863-10183863_G>A	other non-conserving	p.S111N	WT	WT	WT	WT	WT	WT	WT
ACH-002152	LB2518MEL_SKIN	LB2518MEL_SKIN	753579	SIDM00185	skin	nan	nan	nan	nan	nan	nan	nan	nan	nan	nan	nan	nan	SKCM			0.153224			-2.70629	-2.70629			0.384812	1.15467	1.15467	WT	WT	WT	WT	WT	WT	WT	WT	WT	WT	WT	WT	WT	WT	WT	WT	WT	WT	WT
ACH-000053	KARPAS299_HAEMATOPOIETIC_AND_LYMPHOID_TISSUE	KARPAS299_HAEMATOPOIETIC_AND_LYMPHOID_TISSUE	907273	SIDM01010	lymphocyte	25.0	male	68.12312717	lymphoid_neoplasm	Caucasian	ECAAC	Lymphoblastoid, suspension	RPMI-1640+20% FBS	5% DMSO	30 hrs	45.5	Lymphoma:NH_T_cell	nan	1.64144		0.0489067	0.714964		-4.35382	-4.35382	-0.883796		-1.03267	-0.608084	-0.74594	WT	WT	WT	WT	WT	WT	chr17_7577121-7577121_G>A	other non-conserving	p.R273C	WT	WT	WT	WT	WT	WT	WT	WT	WT	WT
ACH-000571	T98G_CENTRAL_NERVOUS_SYSTEM	T98G_CENTRAL_NERVOUS_SYSTEM	687586	SIDM01171	central_nervous_system	61.0	male	130.3439871	glioma	Caucasian	ATCC	adherent fibroblast	EMEM+10% FBS	5% DMSO	nan	37.0	CNS:Glioma_HighGrade	GBM			0.234248			-2.09389	-3.48126			0.911695	0.325504	0.325504	WT	WT	WT	WT	WT	WT	chr17_7577570-7577570_C>T	other non-conserving	p.M237I	WT	WT	WT	WT	WT	WT	WT	WT	WT	WT
ACH-000271	SUDHL10_HAEMATOPOIETIC_AND_LYMPHOID_TISSUE	SUDHL10_HAEMATOPOIETIC_AND_LYMPHOID_TISSUE	1331033	SIDM00389	lymphocyte	25.0	male	92.25565066	lymphoid_neoplasm	Caucasian	DSMZ	round lymphoid cells growing singly or in clumps in suspention	80-90% RPMI 1640 +10-20% h.i. FBS	nan	~ 30-50 hrs	nan	Lymphoma:NH_B_cell	DLBC		0.054723	0.262408		-4.19171	-1.93012	-1.93012		2.12454	1.0526	1.98512	1.98512	WT	WT	WT	WT	WT	WT	chr17_7574034-7574034_C>T	damaging	nan	WT	WT	WT	WT	WT	WT	WT	WT	WT	WT
ACH-002164	MZ1PC_PANCREAS	MZ1PC_PANCREAS	753595	SIDM00053	pancreas	nan	nan	nan	nan	nan	nan	nan	nan	nan	nan	nan	nan	PAAD			0.0254953			-5.29362	-5.29362			-1.84125	-1.61361	-1.61361	WT	WT	WT	WT	WT	WT	chr17_7578222-7578223_TC>-	damaging	p.R209fs	WT	WT	WT	WT	WT	WT	WT	WT	WT	WT
ACH-000522	UMUC3_URINARY_TRACT	UMUC3_URINARY_TRACT	724838	SIDM01182	urinary_tract	nan	male	124.70796240000001	carcinoma	Caucasian	ATCC	Adherent epithelial	EMEM +10%FBS	5%DMSO	nan	386.7	Bladder:Carcinoma	BLCA			0.171004			-2.5479	-3.93526			0.521083	-0.160253	-0.160253	WT	WT	WT	WT	WT	WT	chr17_7579349-7579349_A>C	other non-conserving	p.F113C	WT	WT	WT	WT	WT	WT	WT	WT	WT	chr17_8136332-8136332_C>G
ACH-000764	SH10TC_STOMACH			nan	gastric	nan	nan	207.7215689	carcinoma	Asian	RIKEN	Adherent	RPMI 1640 +10%FBS	5% DMSO	nan	66.0	Gastric:Carcinoma	STAD	7.08808	0.049998		2.8254	-4.32199			1.31083	1.85636			1.31083	chrX_76938976-76938976_G>A	other non-conserving	p.T591I	WT	WT	WT	chr17_7577121-7577121_G>A	other non-conserving	p.R273C	WT	WT	WT	WT	WT	WT	WT	WT	WT	WT
ACH-002331	ZR75B_BREAST			nan	breast
ACH-000341	SKNFI_AUTONOMIC_GANGLIA	SKNFI_AUTONOMIC_GANGLIA	688087	SIDM01099	peripheral_nervous_system	11.0	male	112.135783	neuroblastoma	Caucasian	NIBRI	nan	nan	nan	nan	nan	PNET:Neuroblastoma	NB			0.726554			-0.460858	-1.84822			2.3167	2.07274	2.07274	WT	WT	WT	WT	WT	WT	chr17_7577544-7577544_A>C	other non-conserving	p.M246R	WT	WT	WT	WT	WT	WT	WT	WT	WT	WT
ACH-000549	SNU1076_UPPER_AERODIGESTIVE_TRACT			SIDM00168	upper_aerodigestive	60.0	male	165.31485780000003	carcinoma	Asian	KCLB	epithelial; monolayer	RPMI 1640 with L-glutamine (300mg/L), 90%; heat inactivated fetal bovine serum (FBS),10%	nan	36 hrs	nan	Upper_Aerodigestive_Tract:Carcinoma	HNSC		0.0226568			-5.46391				-0.494395				WT	WT	WT	WT	WT	WT	chr17_7579319-7579329_GTCACAGACTT>-	damaging	p.KSVT120fs	WT	WT	WT	WT	WT	WT	WT	WT	WT	WT
ACH-000219	A375_SKIN	A375_SKIN	906793	SIDM00795	skin	54.0	female	150.05813769999997	malignant_melanoma	Caucasian	ATCC	Adherent	DMEM +10%FBS	5%DMSO	nan	30.8	Skin:Melanoma	SKCM	3.0305		0.151808	1.59955		-2.71968	-4.10705	0.0360838		0.373288	-0.344048	-0.153982	WT	WT	WT	WT	WT	WT	WT	WT	WT	WT	WT	WT	WT	WT	WT	chr7_140453136-140453136_A>T	other non-conserving	p.V600E	WT
ACH-000546	HSC4_UPPER_AERODIGESTIVE_TRACT	HSC4_UPPER_AERODIGESTIVE_TRACT	907062	SIDM00588	upper_aerodigestive	64.0	male	148.28219019999997	carcinoma	Asian	HSSRB	epithelial-like	Eagle's minimal essential medium with 10% calf serum (FCS can be used)	nan	nan	nan	Upper_Aerodigestive_Tract:Carcinoma	HNSC		0.0215917	0.0543687		-5.53338	-4.20108	-4.20108		-0.6374	-0.901258	-0.444658	-0.444658	WT	WT	WT	WT	WT	WT	chr17_7577538-7577538_C>T	other non-conserving	nan	WT	WT	WT	chr2_209106812-209106812_G>A	silent	p.D252D	WT	WT	WT	WT
ACH-001518	HEC116_ENDOMETRIUM			nan	uterus																										WT	WT	WT	WT	WT	WT	WT	WT	WT	WT	WT	WT	WT	WT	WT	WT	WT	WT	WT
ACH-002321	HBL100_BREAST			nan	unknown
ACH-001081	HCC2998_LARGE_INTESTINE	HCC2998_LARGE_INTESTINE	905971	SIDM00118	colorectal	nan	nan	nan	nan	nan	nan	nan	nan	nan	nan	nan	nan	COAD/READ			0.0583556			-4.09899	-4.09899			-0.813419	-0.335423	-0.335423	chrX_76777778-76777778_A>C,chrX_76938150-76938150_T>G	other non-conserving,other non-conserving	p.L2313W,p.K866N	WT	WT	WT	chr17_7578212-7578212_G>A	damaging	p.R213*	WT	WT	WT	WT	WT	WT	WT	WT	WT	chr17_8139434-8139434_G>C,chr17_8141771-8141771_T>C
ACH-000058	ML1_THYROID	ML1_THYROID	1240178	SIDM00442	thyroid	nan	nan	67.70065579999999	carcinoma	Caucasian	DSMZ	ADHERENT MONOLAYERS	DMEM+20% FBS	5%DMSO	4-7 DAYS	66.9	Thyroid:Carcinoma	THCA			0.0443524			-4.49484	-4.49484			-1.154	-0.758966	-0.758966	WT	WT	WT	WT	WT	WT	chr17_7579547-7579547_G>-	damaging	p.P47fs	WT	WT	WT	WT	WT	WT	WT	WT	WT	WT
ACH-000547	HT1197_URINARY_TRACT	HT1197_URINARY_TRACT	907065	SIDM00676	urinary_tract	44.0	male	122.39537320000001	carcinoma	Caucasian	NIBRI	nan	nan	nan	nan	nan	Bladder:Carcinoma	BLCA			0.335954			-1.57366	-2.96103			1.35928	0.882111	0.882111	WT	WT	WT	WT	WT	WT	WT	WT	WT	WT	WT	WT	WT	WT	WT	WT	WT	WT	WT
ACH-000906	ES2_OVARY	ES2_OVARY	1240128	SIDM00861	ovary	47.0	female	317.8007086	carcinoma	Caucasian	ATCC	ADHERENT FIBROBLASTS	McCOY'S5A + 10%FBS	5% DMSO	nan	25.8	Ovary:Carcinoma	OV	3.69923		0.344931	1.88723		-1.53562	-2.92299	0.335233		1.39201	0.922816	0.629024	chrX_76937764-76937764_G>A	other non-conserving	p.P995L	WT	WT	WT	chr17_7577559-7577559_G>A	other non-conserving	p.S241F	WT	WT	WT	WT	WT	WT	chr7_140453136-140453136_A>T	other non-conserving	p.V600E	WT
ACH-000319	MPP89_PLEURA	MPP89_PLEURA	908150	SIDM00222	lung	67.0	male	92.85643096	mesothelioma	Caucasian	GNF	nan	nan	nan	nan	nan	Lung:Mesothelioma	MESO			0.188571			-2.40682	-3.79419			0.642462	-0.00930918	-0.00930918	WT	WT	WT	WT	WT	WT	WT	WT	WT	WT	WT	WT	WT	WT	WT	WT	WT	WT	WT
ACH-002106	ES5_BONE	ES5_BONE	684057	SIDM00263	bone	nan	nan	nan	nan	nan	nan	nan	nan	nan	nan	nan	nan	nan			0.54751			-0.869043	-2.25641			1.96551	1.63601	1.63601	WT	WT	WT	WT	WT	WT	chr17_7577538-7577538_C>T	other non-conserving	nan	WT	WT	WT	WT	WT	WT	WT	WT	WT	WT
ACH-002097	CP66MEL_SKIN	CP66MEL_SKIN	753546	SIDM00190	skin	nan	nan	nan	nan	nan	nan	nan	nan	nan	nan	nan	nan	SKCM			0.138365			-2.85345	-4.24082			0.258197	-0.487172	-0.487172	WT	WT	WT	chr6_33288637-33288637_G>A	silent	p.P305P	WT	WT	WT	WT	WT	WT	WT	WT	WT	WT	WT	WT	WT
ACH-000481	NCIH2170_LUNG	NCIH2170_LUNG	687815	SIDM00716	lung	nan	male	120.02711599999999	carcinoma	Caucasian	nan	MIXED	RPMI1640+10%FBS	5%DMSO	nan	68.7	Lung:NSCLC_Squamous	LUSC	3.91778		0.197573	1.97004		-2.33954	-3.72691	0.421348		0.700345	0.0626737	0.242011	WT	WT	WT	WT	WT	WT	chr17_7578458-7578458_G>C	other non-conserving	p.R158G	WT	WT	WT	WT	WT	WT	WT	WT	WT	WT
ACH-000952	MDAPCA2B_PROSTATE			nan	prostate	63.0	male	547.7072342	carcinoma	African_american	ATCC	adherent epithelial	HAMS F12 +20% FBS	5% DMSO	nan	nan	Prostate:Carcinoma	PRAD		0.0279589			-5.16055				0.130105				WT	WT	WT	chr6_33289271-33289271_C>T	other non-conserving	p.R94H	WT	WT	WT	WT	WT	WT	WT	WT	WT	WT	WT	WT	chr17_8135357-8135357_G>-
ACH-000130	NALM19_HAEMATOPOIETIC_AND_LYMPHOID_TISSUE			nan	blood	26.0	male	117.22886100000001	lymphoid_neoplasm	Asian	DSMZ	small single round cells growing in suspension; small clumps	RPMI-1640+20% FBS	5% DMSO	50-70 hrs	nan	Leukemia:ALL	ALL		0.0311653			-5.00391				0.452551				WT	WT	WT	WT	WT	WT	WT	WT	WT	WT	WT	WT	WT	WT	WT	WT	WT	WT	WT
ACH-000242	RT4_URINARY_TRACT	RT4_URINARY_TRACT	687455	SIDM01085	urinary_tract	63.0	male	89.00340325	carcinoma	Caucasian	ATCC	Adherent epithelial	McCoy's 5A +10%	5%DMSO	nan	103.6	Bladder:Carcinoma	BLCA			0.311525			-1.68258	-3.06995			1.26557	0.765579	0.765579	WT	WT	WT	WT	WT	WT	WT	WT	WT	WT	WT	WT	WT	WT	WT	WT	WT	WT	WT
ACH-000181	SCC9_UPPER_AERODIGESTIVE_TRACT	SCC9_UPPER_AERODIGESTIVE_TRACT	909709	SIDM01080	upper_aerodigestive	25.0	male	80.66946436	carcinoma	Caucasian	NIBRI	nan	nan	nan	nan	nan	Upper_Aerodigestive_Tract:Carcinoma	HNSC			0.0429288			-4.54191	-4.54191			-1.1945	-0.809323	-0.809323	WT	WT	WT	WT	WT	WT	WT	WT	WT	WT	WT	WT	WT	WT	WT	WT	WT	WT	WT
ACH-000953	SUPT1_HAEMATOPOIETIC_AND_LYMPHOID_TISSUE	SUPT1_HAEMATOPOIETIC_AND_LYMPHOID_TISSUE	909743	SIDM01154	blood	8.0	male	509.76984339999996	lymphoid_neoplasm	Caucasian	NIBRI	nan	nan	nan	nan	nan	Leukemia:ALL	ALL			1.92187			0.942511	-0.444855			3.52411	3.57425	3.57425	chrX_76888717-76888717_A>G	silent	p.F1704F	chr6_33286921-33286921_G>-	damaging	p.P672fs	chr17_7577120-7577120_C>T,chr17_7577138-7577138_C>A,chr17_7577538-7577538_C>T	other non-conserving,other non-conserving,other non-conserving	p.R273H,p.R267L,nan	WT	WT	WT	WT	WT	WT	WT	WT	WT	WT
ACH-000135	HS940T_FIBROBLAST	HS940T_SKIN	1298145	SIDM00662	fibroblast	57.0	male	81.50141124	malignant_melanoma	Caucasian	GNF	nan	nan	nan	nan	nan	Skin:Melanoma	SKCM		0.0395875	0.0490442		-4.65881	-4.34977	-4.34977		1.16297	-1.02919	-0.60375	-0.60375	WT	WT	WT	WT	WT	WT	chr17_7578203-7578203_C>A	other non-conserving	p.V216L	WT	WT	WT	WT	WT	WT	WT	WT	WT	WT
ACH-000330	EFM19_BREAST	EFM19_BREAST	906851	SIDM01056	breast	50.0	female	116.3127807	carcinoma	Caucasian	DSMZ	epitheloid, growing in clusters at first, then monolayer	RPMI-10% FBS	5% DMSO	64 hrs	nan	Breast:Carcinoma	BRCA	1.74232		0.134116	0.801009		-2.89845	-4.28581	-0.794319		0.219483	-0.535316	-0.664817	WT	WT	WT	WT	WT	WT	chr17_7578271-7578271_T>C	other non-conserving	p.H193R	WT	WT	WT	WT	WT	WT	WT	WT	WT	WT
ACH-000878	HCC15_LUNG	HCC15_LUNG	1240143	SIDM01072	lung	47.0	male	264.6207321	carcinoma	African_american	DSMZ	mixed; dt= 72-96 hrs	RPMI-1640 + 10%FBS	5% DMSO	nan	51.7	Lung:NSCLC_Squamous	LUSC	1.25399		0.0284822	0.326529		-5.1338	-5.1338	-1.28773		-1.70374	-1.4426	-1.36516	WT	WT	WT	WT	WT	WT	chr17_7577505-7577505_T>A	other non-conserving	p.D259V	WT	WT	WT	WT	WT	WT	WT	WT	WT	WT
ACH-000268	SNU245_BILIARY_TRACT			SIDM00162	bile_duct	nan	nan	127.2186628	carcinoma	Asian	KCLB	epithelial; monolayer	RPMI 1640 with L-glutamine (300mg/L), 90%; heat inactivated fetal bovine serum (FBS),10%	nan	54 hrs	nan	Biliary_Tract:Carcinoma	nan		0.023517			-5.41015				-0.383726				WT	WT	WT	chr6_33288363-33288363_C>G	other non-conserving	p.D349H	chr17_7578406-7578406_C>T	other non-conserving	p.R175H	WT	WT	WT	WT	WT	WT	WT	WT	WT	WT
ACH-001627	P4E6_PROSTATE			nan	prostate																										WT	WT	WT	WT	WT	WT	WT	WT	WT	WT	WT	WT	WT	WT	WT	WT	WT	WT	WT
ACH-002275	MN60_HAEMATOPOIETIC_AND_LYMPHOID_TISSUE	MN60_HAEMATOPOIETIC_AND_LYMPHOID_TISSUE	908143	SIDM00438	leukemia	nan	nan	nan	nan	nan	nan	nan	nan	nan	nan	nan	nan	nan			0.101163			-3.30525	-3.30525			-0.130514	0.513824	0.513824	WT	WT	WT	WT	WT	WT	WT	WT	WT	WT	WT	WT	WT	WT	WT	WT	WT	WT	WT
ACH-000101	KE37_HAEMATOPOIETIC_AND_LYMPHOID_TISSUE	KE37_HAEMATOPOIETIC_AND_LYMPHOID_TISSUE	907277	SIDM01003	blood	27.0	male	90.43769726	lymphoid_neoplasm	Caucasian	DSMZ	nan	nan	nan	25 hrs	nan	Leukemia:ALL	ALL			0.100302			-3.31758	-4.70494			-0.141123	-0.983758	-0.983758	WT	WT	WT	chr6_33289007-33289007_C>T	other non-conserving	p.R182H	chr17_7578474-7578475_->G,chr17_7579312-7579312_C>T	damaging,damaging	p.P152fs,p.T125T	WT	WT	WT	WT	WT	WT	WT	WT	WT	WT
ACH-002463	RPE1SS77_ENGINEERED			nan	engineered																										WT	WT	WT	WT	WT	WT	chr17_7578272-7578272_G>T	other non-conserving	p.H193N	WT	WT	WT	WT	WT	WT	WT	WT	WT	WT
ACH-001009	A673STAG2NT14_ENGINEERED			nan	engineered_bone
ACH-001145	OC316_OVARY			SIDM00219	ovary	60.0	female	nan	carcinoma	Caucasian	ICLC	Monolayer Epithelial	RPMI-1640+ 5% FBS	10%DMSO	nan	48.7	nan	OV													chrX_76845345-76845345_C>A,chrX_76938229-76938230_->T	other non-conserving,damaging	p.R2059M,p.R840fs	WT	WT	WT	chr17_7577120-7577120_C>T	other non-conserving	p.R273H	WT	WT	WT	WT	WT	WT	chr7_140434458-140434458_G>A,chr7_140482927-140482927_G>-,chr7_140500227-140500227_C>T	other non-conserving,damaging,silent	p.A747V,p.P403fs,p.A305A	WT
ACH-001033	CHLA57_BONE			nan	bone																										WT	WT	WT	WT	WT	WT	WT	WT	WT	WT	WT	WT	WT	WT	WT	WT	WT	WT	WT
NA4		M980513_Matched_Normal_Tissue			non_cancerous																0.074264			-3.75119	-3.75119			-0.514191	0.0366907	0.0366907
ACH-000359	MG63_BONE	MG63_BONE	908131	SIDM00525	bone	14.0	male	98.02781332	osteosarcoma	Caucasian	NIBRI	nan	nan	nan	nan	nan	Bone:Sarcoma_Osteo	SARC			0.231015			-2.11394	-3.50131			0.894445	0.304051	0.304051	chrX_76939513-76939513_T>C	other non-conserving	p.D412G	WT	WT	WT	WT	WT	WT	WT	WT	WT	WT	WT	WT	WT	WT	WT	WT
ACH-001142	NHAHTDD_PRIMARY			nan	engineered_central_nervous_system	nan	nan	nan	nan	nan	nan	nan	nan	nan	nan	nan	nan	nan													WT	WT	WT	WT	WT	WT	WT	WT	WT	WT	WT	WT	WT	WT	WT	WT	WT	WT	WT
ACH-001187	SF8657_SKIN			nan	fibroblast	63.0	male	nan	nan	nan	nan	nan	nan	nan	nan	nan	nan	SKCM													WT	WT	WT	WT	WT	WT	WT	WT	WT	WT	WT	WT	WT	WT	WT	WT	WT	WT	WT
ACH-000756	GI1_CENTRAL_NERVOUS_SYSTEM	GI1_CENTRAL_NERVOUS_SYSTEM	906871	SIDM00273	central_nervous_system	61.0	male	189.8293645	glioma	Asian	RIKEN	ADHERENT FIBROBLAST LIKE	DMEM+10%FBS	5% DMSO	nan	35.1	CNS:Glioma	LGG	2.05613		0.125992	1.03993		-2.9886	-4.37596	-0.545865		0.141922	-0.63177	-0.588817	chrX_76939673-76939674_->T	damaging	p.L359fs	WT	WT	WT	chr17_7577114-7577114_C>T	other non-conserving	p.C275Y	WT	WT	WT	WT	WT	WT	WT	WT	WT	WT
ACH-002178	NY_BONE	NY_BONE	910849	SIDM00569	bone	nan	nan	nan	nan	nan	nan	nan	nan	nan	nan	nan	nan	nan			0.740057			-0.434292	-1.82166			2.33956	2.10116	2.10116	WT	WT	WT	WT	WT	WT	WT	WT	WT	WT	WT	WT	WT	WT	WT	WT	WT	WT	WT
ACH-000476	JHH4_LIVER	JHH4_LIVER	1240158	SIDM00616	liver	51.0	male	148.7392775	carcinoma	Asian	HSRRB	Epithelial-like	EMEM +10 % FBS	nan	nan	85.2	Liver:HCC	LIHC			0.142551			-2.81045	-4.19782			0.295192	-0.441166	-0.441166	WT	WT	WT	WT	WT	WT	chr17_7577534-7577534_C>A	other non-conserving	p.R249S	WT	WT	WT	WT	WT	WT	WT	WT	WT	WT
ACH-001130	MOTN1_HAEMATOPOIETIC_AND_LYMPHOID_TISSUE			nan	lymphocyte	65.0	female	nan	lymphoid_neoplasm	Asian	DSMZ	SINGLE OR CLUSTERED OVOID TO ROUND; SOMETIMES IRREGULAR SHPAED CELLS GROWING IN SUSPENSION	RPMI-1640+20% FBS	5%DMSO	nan	nan	Leukemia:ALL	ALL													WT	WT	WT	WT	WT	WT	chr17_7577498-7577498_C>T	damaging	nan	WT	WT	WT	WT	WT	WT	WT	WT	WT	WT
ACH-000665	SKMES1_LUNG	SKMES1_LUNG	909728	SIDM01103	lung	65.0	male	148.3603289	carcinoma	Caucasian	nan	nan	nan	nan	nan	nan	Lung:NSCLC_Squamous	LUSC	3.32943		0.152934	1.73527		-2.70902	-4.09639	0.177219		0.38246	-0.332641	-0.077711	WT	WT	WT	WT	WT	WT	chr17_7577046-7577046_C>A	damaging	p.E298*	WT	WT	WT	WT	WT	WT	WT	WT	WT	WT
ACH-001333	C33A_CERVIX	C33A_CERVIX	687505	SIDM00889	cervix	nan	nan	nan	nan	nan	nan	nan	nan	nan	nan	nan	nan	CESC			0.182999			-2.45009	-3.83746			0.605232	-0.0556074	-0.0556074	WT	WT	WT	chr6_33288805-33288805_G>-	damaging	p.T249fs	chr17_7577121-7577121_G>A	other non-conserving	p.R273C	WT	WT	WT	WT	WT	WT	chr7_140534569-140534569_G>A	other non-conserving	p.A115V	WT
ACH-000803	COLO668_LUNG	COLO668_LUNG	910692	SIDM00143	lung	47.0	female	185.27297	carcinoma	Caucasian	ECACC	nan	nan	nan	nan	nan	Lung:SCLC	SCLC	2.19451		0.14429	1.1339		-2.79296	-4.18032	-0.448147		0.310243	-0.422449	-0.435298	WT	WT	WT	WT	WT	WT	chr17_7573988-7573988_C>G,chr17_7577548-7577548_C>A	other non-conserving,other non-conserving	p.A347P,p.G245C	WT	WT	WT	WT	WT	WT	WT	WT	WT	WT
ACH-001086	HELA_CERVIX	HELA_CERVIX	1298134	SIDM00846	cervix	nan	nan	nan	nan	nan	nan	nan	nan	nan	nan	nan	nan	CESC			0.074707			-3.74261	-3.74261			-0.506809	0.0458712	0.0458712	WT	WT	WT	WT	WT	WT	WT	WT	WT	WT	WT	WT	WT	WT	WT	WT	WT	WT	WT
ACH-001332	BICR78_UPPER_AERODIGESTIVE_TRACT	BICR78_UPPER_AERODIGESTIVE_TRACT	1240122	SIDM00501	upper_aerodigestive	nan	nan	nan	nan	nan	nan	nan	nan	nan	nan	nan	nan	HNSC			0.165288			-2.59695	-3.98431			0.478884	-0.212731	-0.212731	WT	WT	WT	WT	WT	WT	chr17_7578400-7578400_G>A,chr17_7578403-7578403_C>A,chr17_7579575-7579575_G>A	other non-conserving,other non-conserving,damaging	p.P177L,p.C176F,p.Q38*	WT	WT	WT	WT	WT	WT	WT	WT	WT	chr17_8141754-8141754_C>G
ACH-000572	G361_SKIN	G361_SKIN	906865	SIDM00857	skin	31.0	male	131.5867088	malignant_melanoma	Caucasian	ATCC	ADHERENT EPITHELIAL;	McCoy's 5A +10%FBS	5% DMSO	nan	45.2	Skin:Melanoma	SKCM	3.00727		0.135663	1.58845		-2.8819	-4.26927	0.0245417		0.233719	-0.517613	-0.246536	WT	WT	WT	WT	WT	WT	WT	WT	WT	WT	WT	WT	WT	WT	WT	chr7_140453136-140453136_A>T	other non-conserving	p.V600E	WT
ACH-001347	H157_UPPER_AERODIGESTIVE_TRACT			nan	upper_aerodigestive																										WT	WT	WT	WT	WT	WT	chr17_7577022-7577022_G>A	damaging	p.R306*	WT	WT	WT	WT	WT	WT	WT	WT	WT	WT
ACH-001570	MM426_SKIN			nan	skin																										WT	WT	WT	WT	WT	WT	WT	WT	WT	WT	WT	WT	WT	WT	WT	chr7_140453136-140453136_A>T	other non-conserving	p.V600E	WT
ACH-000784	KYSE70_OESOPHAGUS	KYSE70_OESOPHAGUS	753576	SIDM01024	esophagus	77.0	male	201.4414623	carcinoma	Asian	DSMZ	Epitheloid cells growing in monolayers	RPMI 1640+10%FBS	10%DMSO	nan	62.0	Oesophagus:Carcinoma	ESCA	2.34366		0.128396	1.22877		-2.96133	-4.34869	-0.349497		0.165382	-0.602595	-0.476046	WT	WT	WT	chr6_33287246-33287246_G>A	silent	p.V617V	chr17_7577529-7577530_->T,chr17_7579327-7579327_C>A	damaging,other non-conserving	p.I251fs,p.K120N	WT	WT	WT	WT	WT	WT	WT	WT	WT	WT
ACH-000984	HEC6_ENDOMETRIUM			nan	uterus	nan	female	971.9750615	carcinoma	Asian	HSSRB	epithelial-like	Eagle's minimal essential medium with 15% fetal calf serum	nan	nan	nan	Endometrium:Carcinoma	UCEC		0.0276083			-5.17875				0.0926305				chrX_76939613-76939613_C>A	other non-conserving	p.D379Y	WT	WT	WT	chr17_7577120-7577120_C>T	other non-conserving	p.R273H	WT	WT	WT	WT	WT	WT	chr7_140500185-140500185_G>A	silent	p.S319S	chr17_8138378-8138378_C>T,chr17_8138533-8138533_C>T
ACH-001346	H103_UPPER_AERODIGESTIVE_TRACT			nan	upper_aerodigestive																										WT	WT	WT	WT	WT	WT	chr17_7577551-7577551_C>A	other non-conserving	p.G244C	WT	WT	WT	WT	WT	WT	WT	WT	WT	WT
ACH-000740	A253_SALIVARY_GLAND	A253_SALIVARY_GLAND	906794	SIDM00796	upper_aerodigestive	54.0	male	150.1577888	carcinoma	Caucasian	ATCC	Adherent	McCoy's 5A + 10% FBS	5% DMSO	nan	47.3	Salivary_Gland:Carcinoma	HNSC			0.252095			-1.98796	-3.37533			1.00283	0.438842	0.438842	WT	WT	WT	WT	WT	WT	chr17_7578391-7578391_T>-	damaging	p.E180fs	WT	WT	WT	WT	WT	WT	WT	WT	WT	WT
ACH-002011	MP46_UVEA			nan	eye																										WT	WT	WT	WT	WT	WT	WT	WT	WT	WT	WT	WT	WT	WT	WT	WT	WT	WT	WT
ACH-000798	CL40_LARGE_INTESTINE	CL40_LARGE_INTESTINE	1240124	SIDM00960	colorectal	nan	female	180.3106621	carcinoma	Caucasian	DSMZ	adherent ephithelial-like cells growing as monolayers and in aggregates	80% mixture of Dulbecco's MEM + Ham's F 12 at 1:1 + 20% h.i. FBS	nan	~ 3-4 days	nan	Colorectal:Carcinoma	COAD/READ		0.017789	0.0542818		-5.81287	-4.20339	-4.20339		-1.21275	-0.903244	-0.447127	-0.447127	WT	WT	WT	WT	WT	WT	chr17_7577538-7577538_C>T	other non-conserving	nan	WT	WT	WT	WT	WT	WT	WT	WT	WT	WT
ACH-002244	HO1N1_UPPER_AERODIGESTIVE_TRACT	HO1N1_UPPER_AERODIGESTIVE_TRACT	924111	SIDM00592	upper_aerodigestive	nan	nan	nan	nan	nan	nan	nan	nan	nan	nan	nan	nan	HNSC			0.0438707			-4.5106	-4.5106			-1.16756	-0.775822	-0.775822	WT	WT	WT	WT	WT	WT	chr17_7577142-7577142_C>G	other non-conserving	p.G266R	WT	WT	WT	WT	WT	WT	WT	WT	WT	WT
ACH-000208	U178_CENTRAL_NERVOUS_SYSTEM			nan	central_nervous_system	nan	male	nan	glioma	Caucasian	nan	nan	nan	nan	nan	nan	nan	nan													WT	WT	WT	WT	WT	WT	chr17_7577127-7577127_C>T	other non-conserving	p.E271K	WT	WT	WT	WT	WT	WT	WT	WT	WT	WT
ACH-001362	NCIH1770_LUNG	NCIH1770_LUNG	687804	SIDM00737	lung	nan	nan	nan	nan	nan	nan	nan	nan	nan	nan	nan	nan	UNABLE TO CLASSIFY			0.118346			-3.07892	-4.46628			0.0642124	-0.728408	-0.728408	WT	WT	WT	WT	WT	WT	chr17_7577539-7577539_G>A,chr17_7577540-7577540_G>A	other non-conserving,silent	p.R248W,p.N247N	WT	WT	WT	WT	WT	WT	WT	WT	WT	WT
ACH-000443	OVKATE_OVARY	OVKATE_OVARY	1240199	SIDM00466	ovary	40.0	female	nan	carcinoma	Asian	NIBRI	nan	RPMI-1640+10% FBS	5% DMSO	nan	96.0	Ovary:Carcinoma	OV			0.307771			-1.70007	-3.08744			1.25052	0.746865	0.746865	WT	WT	WT	WT	WT	WT	chr17_7577094-7577094_G>A	other non-conserving	nan	WT	WT	WT	WT	WT	WT	WT	WT	WT	WT
ACH-002197	SBC3_LUNG	SBC3_LUNG	753610	SIDM00367	lung	nan	nan	nan	nan	nan	nan	nan	nan	nan	nan	nan	nan	SCLC			0.0644847			-3.9549	-3.9549			-0.689453	-0.181261	-0.181261	WT	WT	WT	WT	WT	WT	WT	WT	WT	WT	WT	WT	WT	WT	WT	WT	WT	WT	WT
ACH-001525	HT3_CERVIX	HT3_CERVIX	907068	SIDM00679	cervix	nan	nan	nan	nan	nan	nan	nan	nan	nan	nan	nan	nan	CESC			0.199446			-2.32593	-3.7133			0.712057	0.0772381	0.0772381	WT	WT	WT	WT	WT	WT	chr17_7577085-7577085_C>T,chr17_7577547-7577547_C>A	other non-conserving,other non-conserving	p.E285K,p.G245V	WT	WT	WT	WT	WT	WT	WT	WT	WT	WT
ACH-002140	HEY_OVARY	HEY_OVARY	1479988	SIDM00968	ovary	nan	nan	nan	nan	nan	nan	nan	nan	nan	nan	nan	nan	OV			0.0645186			-3.95414	-3.95414			-0.6888	-0.18045	-0.18045	WT	WT	WT	WT	WT	WT	WT	WT	WT	WT	WT	WT	WT	WT	WT	chr7_140481417-140481417_C>T	other non-conserving	p.G464E	WT
ACH-001849	ICC9_BILIARY_TRACT			nan	bile_duct																										WT	WT	WT	WT	WT	WT	chr17_7577156-7577156_C>T	damaging	nan	WT	WT	WT	WT	WT	WT	WT	WT	WT	WT
ACH-000111	HCC1187_BREAST	HCC1187_BREAST	749711	SIDM00885	breast	41.0	female	82.86196811	carcinoma	Caucasian	ATCC	Epithelial; mixed adherent and suspension	RPMI-1640+10% FBS	5%DMSO	nan	66.0	Breast:Carcinoma	BRCA	8.94801		0.308602	3.16157		-1.69618	-3.08355	1.66041		1.25387	0.751027	1.20572	WT	WT	WT	WT	WT	WT	chr17_7579363-7579365_ACC>-	other non-conserving	p.G108del	WT	WT	WT	WT	WT	WT	WT	WT	WT	WT
ACH-000639	NCIH211_LUNG	NCIH211_LUNG	1240189	SIDM00704	lung	50.0	female	144.3860352	carcinoma	Caucasian	ATCC	Suspension	RPMI-1640+10%FBS	5% DMSO	nan	176.0	Lung:SCLC	SCLC	0.866998		0.194267	-0.205899		-2.36389	-3.75125	-1.8414		0.6794	0.0366263	-0.902385	WT	WT	WT	WT	WT	WT	chr17_7577538-7577538_C>T	other non-conserving	nan	WT	WT	WT	WT	WT	WT	WT	WT	WT	WT
ACH-000822	SKMEL24_SKIN	SKMEL24_SKIN	909725	SIDM01106	skin	67.0	male	180.5878482	malignant_melanoma	Caucasian	ATCC	Adherent	EMEM + 10% FBS	5%DMSO	nan	110.8	Skin:Melanoma	SKCM	1.72322		0.0960194	0.785108		-3.38053	-4.7679	-0.810853		-0.195285	-1.05111	-0.930983	WT	WT	WT	WT	WT	WT	WT	WT	WT	WT	WT	WT	WT	WT	WT	chr7_140453136-140453136_A>T	other non-conserving	p.V600E	WT
ACH-000335	MSTO211H_PLEURA	MSTO211H_PLEURA	908152	SIDM00640	lung	62.0	male	124.150508	mesothelioma	Caucasian	ATCC	adherenet	RPMI+10%FBS	5% DMSO	nan	35.6	Lung:Mesothelioma	MESO	3.20459		0.115749	1.68014		-3.11093	-4.49829	0.119884		0.036671	-0.762657	-0.321386	WT	WT	WT	WT	WT	WT	WT	WT	WT	WT	WT	WT	WT	WT	WT	WT	WT	WT	WT
ACH-000191	BHT101_THYROID	BHT101_THYROID	906696	SIDM00987	thyroid	63.0	female	103.9713223	carcinoma	Caucasian	DSMZ	epithelial- like cells growing in monolayers	80% Dulbecco's MEM +20% h.i. FBS +0.5% human serum (+0.005 lu/ml TSH +5ug/ml human insulin-cells grow also without these latter supplements)	10%DMSO	~ 2-3 days	38.5	Thyroid:Carcinoma	THCA			0.020374			-5.61713	-5.61713			-2.11958	-1.95973	-1.95973	WT	WT	WT	WT	WT	WT	chr17_7577529-7577529_A>G	other non-conserving	p.I251T	WT	WT	WT	chr2_209103859-209103859_T>C	other non-conserving	p.I364V	chr7_140453136-140453136_A>T	other non-conserving	p.V600E	WT
ACH-001413	UMUC11_URINARY_TRACT			nan	urinary_tract																										WT	WT	WT	WT	WT	WT	WT	WT	WT	WT	WT	WT	WT	WT	WT	WT	WT	WT	WT
ACH-000301	LAMA84_HAEMATOPOIETIC_AND_LYMPHOID_TISSUE	LAMA84_HAEMATOPOIETIC_AND_LYMPHOID_TISSUE	907783	SIDM00346	blood	29.0	female	107.9394111	haematopoietic_neoplasm	Caucasian	DSMZ	single, round to polymorph cellsgrowing in suspention, some cells areloosely adherent	90% RPMI 1640 +10% h. i. FBS	nan	~ 50 hrs	nan	Leukemia:CML	LCML	3.62255		0.123779	1.85701		-3.01416	-3.01416	0.303807		0.119926	0.825265	0.564536	WT	WT	WT	WT	WT	WT	chr17_7576891-7576891_T>A	damaging	p.K319*	WT	WT	WT	WT	WT	WT	WT	WT	WT	WT
ACH-001143	NKL_HAEMATOPOIETIC_AND_LYMPHOID_TISSUE			nan	lymphocyte																										WT	WT	WT	WT	WT	WT	chr17_7574034-7574034_C>T	damaging	nan	WT	WT	WT	chr2_209113112-209113112_C>T	other non-conserving	p.R132H	WT	WT	WT	WT
ACH-001249	YMB1_BREAST			SIDM01260	breast	63.0	female	nan	carcinoma	Caucasian	nan	nan	nan	nan	nan	nan	nan	BRCA
ACH-002107	ES6_BONE	ES6_BONE	949157	SIDM00262	bone	nan	nan	nan	nan	nan	nan	nan	nan	nan	nan	nan	nan	nan			0.079176			-3.65879	-3.65879			-0.434693	0.135553	0.135553	WT	WT	WT	WT	WT	WT	chr17_7578370-7578370_C>T	damaging	nan	WT	WT	WT	WT	WT	WT	WT	WT	WT	WT
ACH-002281	NB14_AUTONOMIC_GANGLIA	NB14_AUTONOMIC_GANGLIA	949178	SIDM00256	peripheral_nervous_system	nan	nan	nan	nan	nan	nan	nan	nan	nan	nan	nan	nan	NB			0.0505052			-4.30742	-4.30742			-0.992753	-0.558439	-0.558439	WT	WT	WT	WT	WT	WT	chr17_7578555-7578555_C>A	damaging	nan	WT	WT	WT	WT	WT	WT	WT	WT	WT	WT
ACH-000935	MDST8_LARGE_INTESTINE	MDST8_LARGE_INTESTINE	1240173	SIDM00527	colorectal	nan	nan	368.6769634	carcinoma	Caucasian	ECACC	adherent	DMEM+10% FBS	5% DMSO	nan	40.9	Colorectal:Carcinoma	COAD/READ			0.228464			-2.12996	-3.51733			0.880662	0.286911	0.286911	WT	WT	WT	WT	WT	WT	WT	WT	WT	WT	WT	WT	WT	WT	WT	chr7_140453136-140453137_AC>TT,chr7_140453137-140453137_C>T	other non-conserving,other non-conserving	p.V600K,p.V600M	WT
ACH-000858	KNS62_LUNG	KNS62_LUNG	753569	SIDM00606	lung	49.0	male	223.14215860000002	carcinoma	Asian	ATCC	adherent	EMEM +20%FBS	5% DMSO	nan	59.2	Lung:NSCLC_Squamous	LUSC	2.23219		0.125044	1.15846		-2.99949	-4.38686	-0.422608		0.132547	-0.643428	-0.533018	WT	WT	WT	WT	WT	WT	chr17_7577534-7577534_C>A	other non-conserving	p.R249S	WT	WT	WT	WT	WT	WT	WT	WT	WT	WT
ACH-000570	YKG1_CENTRAL_NERVOUS_SYSTEM	YKG1_CENTRAL_NERVOUS_SYSTEM	687592	SIDM00315	central_nervous_system	nan	female	162.47555309999998	glioma	Asian	GNF	nan	nan	nan	nan	nan	CNS:Glioma_HighGrade	GBM			0.0993949			-3.33068	-4.71805			-0.1524	-0.997781	-0.997781	chrX_76919028-76919028_A>T	other non-conserving	p.N1321K	WT	WT	WT	chr17_7578484-7578492_GAATCAACC>-	other non-conserving	p.146_149WVDS>C	WT	WT	WT	WT	WT	WT	WT	WT	WT	WT
ACH-000415	BICR6_UPPER_AERODIGESTIVE_TRACT			nan	upper_aerodigestive	nan	male	108.9208548	carcinoma	Caucasian	ECACC	Adherent keratinocyte	DMEM+10%FBS	5% DMSO	nan	119.4	Upper_Aerodigestive_Tract:Carcinoma	HNSC		0.0164916			-5.92212				-1.43765				WT	WT	WT	WT	WT	WT	chr17_7578275-7578275_G>A	damaging	p.Q192*	WT	WT	WT	WT	WT	WT	WT	WT	WT	WT
ACH-002361	MZ7B_MATCHED_NORMAL_TISSUE	MZ7B_Matched_Normal_Tissue		nan	non_cancerous																0.082752			-3.59506	-3.59506			-0.379861	0.203741	0.203741	WT	WT	WT	WT	WT	WT	WT	WT	WT	WT	WT	WT	WT	WT	WT	WT	WT	WT	WT
ACH-002015	MEL285_UVEA			nan	eye	nan	nan	nan	nan	nan	nan	nan	nan	nan	nan	nan	nan	nan													WT	WT	WT	WT	WT	WT	WT	WT	WT	WT	WT	WT	WT	WT	WT	WT	WT	WT	WT
ACH-002177	NCIH835_LUNG	NCIH835_LUNG	753607	SIDM01133	lung	nan	nan	nan	nan	nan	nan	nan	nan	nan	nan	nan	nan	nan			0.0469476			-4.4128	-4.4128			-1.08342	-0.671189	-0.671189	WT	WT	WT	WT	WT	WT	chr17_7579311-7579311_C>A,chr17_7579312-7579312_C>T	damaging,damaging	nan,p.T125T	WT	WT	WT	WT	WT	WT	WT	WT	WT	WT
ACH-000877	EB1_HAEMATOPOIETIC_AND_LYMPHOID_TISSUE			SIDM00862	lymphocyte	9.0	female	210.5005154	lymphoid_neoplasm	African_american	ATCC	suspension	RPMI + 10 % FBS	5% DMSO	nan	89.8	Lymphoma:NH_B_cell	DLBC													chrX_76944398-76944398_C>T	silent	p.V169V	WT	WT	WT	chr17_7577550-7577550_C>T	other non-conserving	p.G244D	WT	WT	WT	WT	WT	WT	WT	WT	WT	WT
ACH-001097	KARPAS384_HAEMATOPOIETIC_AND_LYMPHOID_TISSUE			nan	lymphocyte																										WT	WT	WT	WT	WT	WT	WT	WT	WT	WT	WT	WT	WT	WT	WT	WT	WT	WT	WT
ACH-000730	SKMEL5_SKIN	SKMEL5_SKIN	905956	SIDM00080	skin	24.0	female	138.44600380000003	malignant_melanoma	Caucasian	NIBRI	nan	nan	nan	nan	nan	Skin:Melanoma	SKCM	3.42393		0.103748	1.77565		-3.26884	-3.26884	0.21921		-0.0991947	0.552771	0.385991	WT	WT	WT	WT	WT	WT	WT	WT	WT	WT	WT	WT	WT	WT	WT	chr7_140453136-140453136_A>T	other non-conserving	p.V600E	WT
ACH-000600	SLR26_KIDNEY			nan	kidney	nan	nan	128.6331408	carcinoma	Caucasian	nan	nan	nan	nan	nan	nan	nan	KIRC													WT	WT	WT	WT	WT	WT	WT	WT	WT	chr3_10188246-10188246_T>A	other non-conserving	p.V130D	WT	WT	WT	WT	WT	WT	WT
ACH-000607	KYM1_SOFT_TISSUE	KYM1_SOFT_TISSUE	1240166	SIDM00552	soft_tissue	1.0	nan	189.0330306	rhabdomyosarcoma	Asian	NIBRI	nan	nan	nan	nan	nan	Soft_Tissue:Sarcoma_Rhabdoid	SARC	1.82452		0.193799	0.867514		-2.36737	-3.75473	-0.72516		0.676406	0.0329032	-0.346129	WT	WT	WT	WT	WT	WT	WT	WT	WT	WT	WT	WT	WT	WT	WT	WT	WT	WT	WT
ACH-001182	RPMI6666_HAEMATOPOIETIC_AND_LYMPHOID_TISSUE	RPMI6666_HAEMATOPOIETIC_AND_LYMPHOID_TISSUE	909701	SIDM00813	non_cancerous	nan	nan	nan	lymphoblastoid	Caucasian	NIBRI	nan	nan	nan	nan	nan	nan	nan			0.450989			-1.14884	-2.5362			1.72479	1.33665	1.33665	WT	WT	WT	WT	WT	WT	WT	WT	WT	WT	WT	WT	WT	WT	WT	WT	WT	WT	WT
ACH-000154	HS888T_FIBROBLAST			nan	fibroblast	20.0	male	109.9014919	osteosarcoma	Caucasian	GNF	nan	nan	nan	nan	nan	nan	nan		0.027632			-5.17752				0.0951796				WT	WT	WT	WT	WT	WT	WT	WT	WT	WT	WT	WT	WT	WT	WT	WT	WT	WT	WT
ACH-000739	HEPG2_LIVER			SIDM00904	liver	15.0	male	169.6811465	carcinoma	Caucasian	NIBRI/ATCC	Epithelial adherent	EMEM +10%FBS	5% DMSO	nan	40.7	Liver:HCC	LIHC	2.35446			1.23539				-0.342604				-0.342604	WT	WT	WT	WT	WT	WT	WT	WT	WT	WT	WT	WT	WT	WT	WT	WT	WT	WT	WT
ACH-001716	GOTO_AUTONOMIC_GANGLIA	GOTO_AUTONOMIC_GANGLIA	906875	SIDM00544	peripheral_nervous_system	nan	nan	nan	nan	nan	nan	nan	nan	nan	nan	nan	nan	NB			0.0428045			-4.54609	-4.54609			-1.1981	-0.813799	-0.813799	WT	WT	WT	WT	WT	WT	WT	WT	WT	WT	WT	WT	chr2_209113210-209113210_T>C	other non-conserving	p.I99M	WT	WT	WT	WT
ACH-000228	BICR31_UPPER_AERODIGESTIVE_TRACT	BICR31_UPPER_AERODIGESTIVE_TRACT	1290725	SIDM00078	upper_aerodigestive	nan	male	90.85145988	carcinoma	Caucasian	ECACC	adherent; epithelial, keratinocyte	DMEM+20% FBS	5%DMSO	nan	77.7	Upper_Aerodigestive_Tract:Carcinoma	HNSC		0.0191099	0.0376811		-5.70954	-4.73002	-4.73002		-1.00003	-1.35634	-1.01058	-1.01058	WT	WT	WT	WT	WT	WT	chr17_7578410-7578412_TCA>-	other non-conserving	p.173_174VR>G	WT	WT	WT	WT	WT	WT	WT	WT	WT	WT
ACH-001035	CHLA99_BONE			nan	bone																										WT	WT	WT	WT	WT	WT	chr17_7577124-7577124_C>A,chr17_7578176-7578176_C>A	other non-conserving,damaging	p.V272L,nan	WT	WT	WT	WT	WT	WT	WT	WT	WT	WT
ACH-000159	OSRC2_KIDNEY	OSRC2_KIDNEY	909250	SIDM00239	kidney	nan	male	96.71783566	carcinoma	Asian	RIKEN	epithelial-like	RPMI 1640 +10% FBS	nan	nan	nan	Kidney:Carcinoma	KIRC	2.64636		0.0460595	1.40401		-4.44036	-4.44036	-0.167261		-1.10712	-0.700669	-0.433965	WT	WT	WT	WT	WT	WT	WT	WT	WT	chr3_10183704-10183704_G>-	damaging	p.R58fs	WT	WT	WT	WT	WT	WT	chr17_8135449-8135449_G>A
ACH-000332	YAPC_PANCREAS	YAPC_PANCREAS	909904	SIDM00411	pancreas	43.0	male	115.52540549999999	carcinoma	Asian	DSMZ	Adherent	RPMI-1640 + 10% FBS	10%DMSO	nan	72.7	Pancreas:Carcinoma	PAAD			0.0369317			-4.759	-4.759			-1.38127	-1.04159	-1.04159	WT	WT	WT	WT	WT	WT	chr17_7578394-7578394_T>C	other non-conserving	p.H179R	WT	WT	WT	WT	WT	WT	WT	WT	WT	WT
ACH-000342	CL14_LARGE_INTESTINE			nan	colorectal	nan	male	104.96645149999999	carcinoma	Caucasian	DSMZ	strongly adherent epitheloid cells growing in monolayers and forming islets	DMEM:HAM's F12 1:1 +20% FBS	10%DMSO	~ 170 hrs	nan	Colorectal:Carcinoma	COAD/READ		0.0192562			-5.69853				-0.977377				chrX_76937718-76937718_T>C	silent	p.E1010E	WT	WT	WT	chr17_7577121-7577121_G>A	other non-conserving	p.R273C	WT	WT	WT	WT	WT	WT	WT	WT	WT	WT
ACH-000300	SLR25_KIDNEY			nan	kidney	nan	nan	nan	carcinoma	Caucasian	nan	nan	nan	nan	nan	nan	nan	KIRC													WT	WT	WT	chr6_33287379-33287379_G>C	other non-conserving	p.A573G	chr17_7579470-7579471_->G	damaging	p.V73fs	chr3_10183764-10183764_A>C	other non-conserving	p.N78T	WT	WT	WT	WT	WT	WT	WT
ACH-000875	NCIH2347_LUNG	NCIH2347_LUNG	687820	SIDM00726	lung	54.0	female	250.70412599999997	carcinoma	Caucasian	ATCC	Mixed, majority adherent	RPMI 1640 +10% FBS	5%DMSO	nan	181.8	Lung:NSCLC_Adeno	LUAD			0.123178			-3.02118	-4.40855			0.113884	-0.666636	-0.666636	chrX_76814318-76814318_C>A	damaging	nan	WT	WT	WT	chr17_7579312-7579312_C>T	damaging	p.T125T	WT	WT	WT	WT	WT	WT	WT	WT	WT	WT
ACH-000494	OELE_OVARY			nan	engineered_ovary	nan	nan	115.99100459999998	other	Caucasian	nan	nan	nan	nan	nan	nan	nan	OV													WT	WT	WT	WT	WT	WT	WT	WT	WT	WT	WT	WT	WT	WT	WT	WT	WT	WT	WT
ACH-000468	PK45H_PANCREAS			nan	pancreas	nan	nan	169.5441881	carcinoma	Asian	RIKEN	Adherent	RPMI + 10 % FBS	5%DMSO	nan	67.4	Pancreas:Carcinoma	PAAD		0.0318969			-4.97044				0.52146				WT	WT	WT	WT	WT	WT	WT	WT	WT	WT	WT	WT	WT	WT	WT	WT	WT	WT	WT
ACH-000616	HS746T_STOMACH	HS746T_STOMACH	1240151	SIDM00665	gastric	74.0	male	130.83669270000001	carcinoma	Caucasian	NIBRI	nan	nan	nan	nan	nan	Gastric:Carcinoma	STAD	36.0178		1.43637	5.17064		0.522427	-0.864939	3.74964		3.16269	3.12479	3.43721	WT	WT	WT	chr6_33287438-33287438_C>G	other non-conserving	p.E553D	chr17_7576891-7576891_T>A	damaging	p.K319*	WT	WT	WT	WT	WT	WT	WT	WT	WT	WT
ACH-001393	SUM190PT_BREAST			nan	breast
ACH-000507	KE39_STOMACH			nan	gastric	77.0	male	148.4340211	carcinoma	Asian	RIKEN	Adherent	RPMI 1640 +10%FBS	5% DMSO	nan	92.0	Gastric:Carcinoma	STAD	1.58281	0.025109		0.662491	-5.31565			-0.938362	-0.18918			-0.938362	WT	WT	WT	WT	WT	WT	chr17_7577124-7577124_C>A	other non-conserving	p.V272L	WT	WT	WT	WT	WT	WT	WT	WT	WT	WT
ACH-000224	HS819T_FIBROBLAST			nan	fibroblast	60.0	male	85.72875647	chondrosarcoma	Caucasian	NIBRI	nan	nan	nan	nan	nan	Bone:Sarcoma_Chondro	SARC		0.027006			-5.21058				0.027119				WT	WT	WT	WT	WT	WT	WT	WT	WT	WT	WT	WT	WT	WT	WT	WT	WT	WT	WT
ACH-002067	NOS1_BONE	NOS1_BONE		SIDM00242	bone	nan	nan	nan	nan	nan	nan	nan	nan	nan	nan	nan	nan	nan			0.64786			-0.626246	-2.01361			2.17441	1.89579	1.89579	WT	WT	WT	WT	WT	WT	chr17_7577120-7577120_C>T	other non-conserving	p.R273H	WT	WT	WT	WT	WT	WT	WT	WT	WT	WT
ACH-000245	BL41_HAEMATOPOIETIC_AND_LYMPHOID_TISSUE	BL41_HAEMATOPOIETIC_AND_LYMPHOID_TISSUE	910706	SIDM00985	lymphocyte	8.0	male	84.59612727	lymphoid_neoplasm	Caucasian	DSMZ	Adherent	RPMI + 10 % FBS	5%DMSO	nan	25.5	Lymphoma:NH_B_cell	DLBC		0.0226932	0.043426		-5.46159	-4.5253	-4.5253		-0.489618	-1.1802	-0.791548	-0.791548	WT	WT	WT	WT	WT	WT	chr17_7577538-7577538_C>T	other non-conserving	nan	WT	WT	WT	WT	WT	WT	WT	WT	WT	WT
ACH-001956	MUGCHOR1_BONE			nan	bone																										WT	WT	WT	WT	WT	WT	WT	WT	WT	WT	WT	WT	WT	WT	WT	WT	WT	WT	WT
ACH-002114	EW16_BONE	EW16_BONE	949165	SIDM00198	bone	nan	nan	nan	nan	nan	nan	nan	nan	nan	nan	nan	nan	nan			0.128578			-2.95928	-4.34665			0.16714	-0.600408	-0.600408	WT	WT	WT	WT	WT	WT	chr17_7579328-7579328_T>-	damaging	p.K120fs	WT	WT	WT	WT	WT	WT	WT	WT	WT	WT
ACH-002103	ES1_BONE	ES1_BONE	949158	SIDM00266	bone	nan	nan	nan	nan	nan	nan	nan	nan	nan	nan	nan	nan	nan			0.164064			-2.60767	-3.99504			0.469658	-0.224204	-0.224204	WT	WT	WT	WT	WT	WT	chr17_7577538-7577538_C>T	other non-conserving	nan	WT	WT	WT	WT	WT	WT	WT	WT	WT	WT
ACH-002091	CAL39_VULVA	CAL39_VULVA	924107	SIDM00935	skin	nan	nan	nan	nan	nan	nan	nan	nan	nan	nan	nan	nan	CESC			0.200866			-2.31569	-3.70306			0.720863	0.088189	0.088189	WT	WT	WT	WT	WT	WT	chr17_7578478-7578478_G>T	other non-conserving	p.P151H	WT	WT	WT	WT	WT	WT	WT	WT	WT	WT
ACH-000012	HCC827_LUNG	HCC827_LUNG	1240146	SIDM01067	lung	39.0	female	82.92654033	carcinoma	Caucasian	ATCC	Adherent	RPMI-1640 10% FBS	5%DMSO	nan	117.6	Lung:NSCLC_Adeno	LUAD	1.64123		0.0924546	0.714776		-3.43511	-4.82248	-0.883992		-0.242245	-1.10951	-0.996751	WT	WT	WT	WT	WT	WT	chr17_7578195-7578197_CAC>-	other non-conserving	p.V218del	WT	WT	WT	WT	WT	WT	WT	WT	WT	WT
ACH-002350	HA7EBV_MATCHED_NORMAL_TISSUE	HA7EBV_Matched_Normal_Tissue		nan	non_cancerous																0.045889			-4.44571	-4.44571			-1.11173	-0.706393	-0.706393	WT	WT	WT	WT	WT	WT	WT	WT	WT	WT	WT	WT	WT	WT	WT	WT	WT	WT	WT
ACH-002211	BALL1_HAEMATOPOIETIC_AND_LYMPHOID_TISSUE	BALL1_HAEMATOPOIETIC_AND_LYMPHOID_TISSUE	910705	SIDM00287	leukemia	nan	nan	nan	nan	nan	nan	nan	nan	nan	nan	nan	nan	nan			0.0451276			-4.46985	-4.46985			-1.1325	-0.732219	-0.732219	chrX_76763972-76763972_T>A,chrX_76940062-76940064_AAG>-	other non-conserving,other non-conserving	p.M2446L,p.228_229NL>K	WT	WT	WT	chr17_7577096-7577096_T>C,chr17_7577100-7577100_T>G	other non-conserving,silent	p.D281G,p.R280R	WT	WT	WT	WT	WT	WT	WT	WT	WT	WT
ACH-002005	SKMEL19_SKIN			nan	skin																										WT	WT	WT	WT	WT	WT	chr17_7578537-7578537_G>T	other non-conserving	p.N131K	WT	WT	WT	WT	WT	WT	chr7_140453136-140453136_A>T	other non-conserving	p.V600E	WT
ACH-000955	SNU407_LARGE_INTESTINE	SNU407_LARGE_INTESTINE	1660034	SIDM00214	colorectal	37.0	male	525.9938628000001	carcinoma	Asian	KCLB	epithelial; monolayer	RPMI 1640 with L-glutamine (300mg/L), 90%; heat inactivated fetal bovine serum (FBS),10%	nan	42 hrs	nan	Colorectal:Carcinoma	COAD/READ	3.15784		0.0709952	1.65894		-3.81613	-3.81613	0.0978357		-0.570065	-0.0327923	0.0325217	chrX_76937241-76937243_CTT>-	other non-conserving	p.K1169del	WT	WT	WT	chr17_7579420-7579420_G>-	damaging	p.P89fs	WT	WT	WT	WT	WT	WT	chr7_140434522-140434522_G>A	other non-conserving	p.R726C	WT
ACH-000189	RCC10RGB_KIDNEY	RCC10RGB_KIDNEY	909974	SIDM00235	kidney	nan	male	130.9359681	carcinoma	Asian	RIKEN	ADHERENT; EPITHELIAL-LIKE	DMEM+10% FBS	5%DMSO	nan	122.9	Kidney:Carcinoma	KIRC			0.0234933			-5.41161	-5.41161			-1.94275	-1.73984	-1.73984	WT	WT	WT	WT	WT	WT	WT	WT	WT	chr3_10183698-10183698_C>-	damaging	p.A56fs	WT	WT	WT	WT	WT	WT	WT
ACH-001740	RH28_SOFT_TISSUE			nan	soft_tissue																										WT	WT	WT	WT	WT	WT	chr17_7578371-7578371_C>A	damaging	p.G187C	WT	WT	WT	WT	WT	WT	WT	WT	WT	WT
ACH-001751	RH36_SOFT_TISSUE			nan	soft_tissue																										WT	WT	WT	WT	WT	WT	WT	WT	WT	WT	WT	WT	WT	WT	WT	WT	WT	WT	WT
ACH-000783	CAMA1_BREAST	CAMA1_BREAST	946382	SIDM00920	breast	51.0	female	168.5219909	carcinoma	Caucasian	ATCC	Adherent epithelial	EMEM+10%FBS	5%DMSO	nan	114.8	Breast:Carcinoma	BRCA	1.84116		0.127698	0.880617		-2.96919	-4.35656	-0.711535		0.158616	-0.611009	-0.661272	WT	WT	WT	WT	WT	WT	chr17_7577099-7577099_C>G	other non-conserving	p.R280T	chr3_10183655-10183655_G>T	damaging	p.E42*	WT	WT	WT	WT	WT	WT	WT
ACH-000160	BT12_SOFT_TISSUE			nan	soft_tissue	nan	nan	nan	nan	nan	nan	nan	nan	nan	nan	nan	nan	nan													WT	WT	WT	WT	WT	WT	WT	WT	WT	WT	WT	WT	WT	WT	WT	WT	WT	WT	WT
ACH-000477	MALME3M_SKIN			SIDM00011	skin	43.0	male	111.6048074	malignant_melanoma	Caucasian	NIBRI	nan	nan	nan	nan	122.9	Skin:Melanoma	SKCM		0.0243332			-5.36093				-0.282392				WT	WT	WT	WT	WT	WT	WT	WT	WT	WT	WT	WT	WT	WT	WT	chr7_140453136-140453136_A>T	other non-conserving	p.V600E	WT
ACH-001513	HCA1_CERVIX			nan	cervix																										WT	WT	WT	WT	WT	WT	chr17_7577121-7577121_G>A	other non-conserving	p.R273C	WT	WT	WT	WT	WT	WT	WT	WT	WT	WT
ACH-002327	MCF12A_BREAST			nan	breast
ACH-000983	KCL22_HAEMATOPOIETIC_AND_LYMPHOID_TISSUE	KCL22_HAEMATOPOIETIC_AND_LYMPHOID_TISSUE	1330931	SIDM01004	blood	32.0	female	857.8398766	haematopoietic_neoplasm	Asian	DSMZ	round, single cells in suspention, sometimes in small clusters	90% RPMI 1640 + 10% h. i. FBS	nan	~ 24 hrs	nan	Leukemia:CML	LCML		0.0226102	0.0583319		-5.46688	-4.09957	-4.09957		-0.500505	-0.813924	-0.33605	-0.33605	WT	WT	WT	WT	WT	WT	chr17_7577036-7577036_G>-	damaging	p.P301fs	WT	WT	WT	WT	WT	WT	chr7_140624440-140624440_C>T	other non-conserving	p.D22N	WT
ACH-001645	SEKI_SKIN			nan	skin																										WT	WT	WT	WT	WT	WT	WT	WT	WT	WT	WT	WT	WT	WT	WT	chr7_140453136-140453136_A>T	other non-conserving	p.V600E	WT
ACH-000853	NCIH661_LUNG	NCIH661_LUNG	687829	SIDM01122	lung	43.0	male	209.1259946	carcinoma	Caucasian	ATCC	adherent	RPMI 1640+10%FBS	5%DMSO	nan	59.5	Lung:NSCLC_Large_Cell	nan	15.7803		0.754466	3.98005		-0.406472	-1.79384	2.51155		2.36349	2.13093	2.32124	chrX_76855018-76855019_->T,chrX_76855979-76855979_T>G	damaging,other non-conserving	p.D1940fs,p.Q1874P	WT	WT	WT	chr17_7578205-7578205_C>A,chr17_7578457-7578457_C>A	other non-conserving,other non-conserving	p.S215I,p.R158L	WT	WT	WT	WT	WT	WT	chr7_140494164-140494164_G>T	silent	p.R362R	WT
ACH-000006	MONOMAC6_HAEMATOPOIETIC_AND_LYMPHOID_TISSUE	MONOMAC6_HAEMATOPOIETIC_AND_LYMPHOID_TISSUE	908148	SIDM01023	blood	64.0	male	77.06523381	haematopoietic_neoplasm	Caucasian	DSMZ	single, round/ multiformed cells or small clusters of cells in suspention, sometimes loosely adherent; 1-5% giant cells	90% RPMI 1640 +10% h.i. FBS	nan	~ 60 hrs	55.3	Leukemia:AML	LAML			0.0845888			-3.56339	-3.56339			-0.352611	0.237628	0.237628	WT	WT	WT	WT	WT	WT	chr17_7577120-7577120_C>T	other non-conserving	p.R273H	WT	WT	WT	chr2_209104714-209104714_G>A	silent	p.L288L	WT	WT	WT	WT
ACH-000677	SW1573_LUNG	SW1573_LUNG	724878	SIDM01163	lung	44.0	female	122.6052624	carcinoma	Caucasian	ATCC	Adherent epithelial	L15+10%FBS	5%DMSO	nan	41.9	Lung:NSCLC_Squamous	LUAD		0.0280093	0.0760861		-5.15795	-3.71622	-3.71622		0.135458	-0.484104	0.0741062	0.0741062	WT	WT	WT	WT	WT	WT	WT	WT	WT	WT	WT	WT	WT	WT	WT	WT	WT	WT	WT
ACH-001336	CASKI_CERVIX	CASKI_CERVIX	906824	SIDM00923	cervix	nan	nan	nan	nan	nan	nan	nan	nan	nan	nan	nan	nan	CESC			0.28065			-1.83316	-3.22052			1.13602	0.604473	0.604473	WT	WT	WT	WT	WT	WT	WT	WT	WT	WT	WT	WT	WT	WT	WT	WT	WT	WT	WT
ACH-001358	MDAMB330_BREAST	MDAMB330_BREAST	1330941	SIDM00631	breast	nan	nan	nan	nan	nan	nan	nan	nan	nan	nan	nan	nan	BRCA			0.0570189			-4.13242	-4.13242			-0.842182	-0.371192	-0.371192	WT	WT	WT	WT	WT	WT	chr17_7578190-7578190_T>C	other non-conserving	p.Y220C	WT	WT	WT	WT	WT	WT	WT	WT	WT	WT
ACH-000758	MKN74_STOMACH			SIDM00248	gastric	37.0	male	190.58462450000002	carcinoma	Asian	HSSRB	epithelial-like	RPMI 1640 medium with 10% heat inactivated fetal bovine serum	nan	nan	nan	Gastric:Carcinoma	STAD	2.33383	0.017342		1.2227	-5.84959			-0.355807	-1.28833			-0.355807	WT	WT	WT	WT	WT	WT	chr17_7577530-7577530_T>G	other non-conserving	p.I251L	WT	WT	WT	WT	WT	WT	WT	WT	WT	WT
ACH-001119	MAC2A_HAEMATOPOIETIC_AND_LYMPHOID_TISSUE			nan	lymphocyte																										WT	WT	WT	WT	WT	WT	WT	WT	WT	WT	WT	WT	WT	WT	WT	WT	WT	WT	WT
ACH-000140	PFEIFFER_HAEMATOPOIETIC_AND_LYMPHOID_TISSUE			nan	lymphocyte	nan	male	107.2860755	lymphoid_neoplasm	Caucasian	ATCC	suspension, lymphoblast	RPMI-1640 + 10% FBS	5%DMSO	nan	34.1	Lymphoma:NH_B_cell	DLBC		0.0212351			-5.5574				-0.686851				WT	WT	WT	WT	WT	WT	WT	WT	WT	WT	WT	WT	WT	WT	WT	WT	WT	WT	WT
ACH-000455	LN428_CENTRAL_NERVOUS_SYSTEM			nan	central_nervous_system	nan	male	115.14648899999999	glioma	Caucasian	nan	nan	nan	nan	nan	nan	nan	nan													WT	WT	WT	WT	WT	WT	chr17_7577094-7577094_G>A,chr17_7578413-7578413_C>T	other non-conserving,other non-conserving	nan,p.V173M	WT	WT	WT	WT	WT	WT	WT	WT	WT	WT
ACH-002229	D502MG_CENTRAL_NERVOUS_SYSTEM	D502MG_CENTRAL_NERVOUS_SYSTEM	946373	SIDM00208	central_nervous_system	nan	nan	nan	nan	nan	nan	nan	nan	nan	nan	nan	nan	LGG			0.178995			-2.48201	-3.86937			0.577772	-0.0897558	-0.0897558	WT	WT	WT	WT	WT	WT	WT	WT	WT	WT	WT	WT	WT	WT	WT	WT	WT	WT	WT
ACH-000747	NCIH1703_LUNG	NCIH1703_LUNG	908474	SIDM00740	lung	54.0	male	166.67839019999997	carcinoma	Caucasian	ATCC	Adherent	RPMI+10%FBS	5% DMSO	nan	41.1	Lung:NSCLC_Squamous	LUSC	24.77		1.13787	4.63052		0.186336	-1.20103	3.18797		2.87352	2.76519	2.97658	WT	WT	WT	WT	WT	WT	chr17_7577018-7577018_C>A	damaging	nan	WT	WT	WT	WT	WT	WT	WT	WT	WT	WT
ACH-002147	K2_SKIN	K2_SKIN	1298160	SIDM00126	skin	nan	nan	nan	nan	nan	nan	nan	nan	nan	nan	nan	nan	SKCM			0.173084			-2.53046	-2.53046			0.53609	1.3428	1.3428	WT	WT	WT	WT	WT	WT	WT	WT	WT	WT	WT	WT	WT	WT	WT	chr7_140453135-140453135_C>T,chr7_140453136-140453136_A>T	silent,other non-conserving	p.V600V,p.V600E	WT
ACH-000782	SEM_HAEMATOPOIETIC_AND_LYMPHOID_TISSUE			nan	blood	5.0	female	192.3275958	lymphoid_neoplasm	Caucasian	DSMZ	SUSPENSION (round polygonal single, rather small cells)	IMDM+10%FBS	10% DMSO	nan	121.5	Leukemia:ALL	ALL		0.0240875			-5.37557				-0.312535				WT	WT	WT	WT	WT	WT	chr17_7577538-7577538_C>T,chr17_7579312-7579312_C>T	other non-conserving,damaging	nan,p.T125T	WT	WT	WT	WT	WT	WT	WT	WT	WT	WT
ACH-000495	TUHR4TKB_KIDNEY			nan	kidney	nan	nan	119.39891180000001	carcinoma	Asian	RIKEN	adherent	DMEM+10% FBS	5% DMSO	nan	88.4	Kidney:Carcinoma	KIRC		0.0242889			-5.36356				-0.287807				WT	WT	WT	WT	WT	WT	WT	WT	WT	chr3_10183825-10183825_C>-	damaging	p.Y98fs	WT	WT	WT	WT	WT	WT	WT
ACH-000185	HS737T_FIBROBLAST			nan	fibroblast	10.0	female	83.04201116	giant_cell_tumour	Caucasian	ATCC	suspension	DMEM+10%FBS	5% DMSO	nan	nan	nan	nan													chrX_76939673-76939674_->T	damaging	p.L359fs	WT	WT	WT	WT	WT	WT	WT	WT	WT	chr2_209113355-209113355_G>C	other non-conserving	p.A51G	WT	WT	WT	WT
ACH-001802	LPS853_SOFT_TISSUE			nan	soft_tissue																										WT	WT	WT	WT	WT	WT	WT	WT	WT	WT	WT	WT	WT	WT	WT	WT	WT	WT	WT
ACH-000610	NCIH2227_LUNG	NCIH2227_LUNG	688018	SIDM00730	lung	54.0	male	136.788956	carcinoma	Caucasian	ATCC	mixed	DMEM:HAM's F12 1:1 +5% FBS	5%DMSO	nan	187.6	Lung:SCLC	SCLC	1.21015		0.0302446	0.275185		-5.04718	-5.04718	-1.34112		-1.62921	-1.34993	-1.34552	WT	WT	WT	WT	WT	WT	chr17_7577157-7577157_T>G	damaging	nan	WT	WT	WT	WT	WT	WT	chr7_140500184-140500184_C>A	other non-conserving	p.A320S	WT
ACH-001497	ESO51_OESOPHAGUS	ESO51_OESOPHAGUS	1503367	SIDM00538	esophagus	nan	nan	nan	nan	nan	nan	nan	nan	nan	nan	nan	nan	ESCA			0.0230942			-5.43633	-5.43633			-1.96402	-1.76629	-1.76629	WT	WT	WT	WT	WT	WT	chr17_7578406-7578406_C>T	other non-conserving	p.R175H	WT	WT	WT	WT	WT	WT	WT	WT	WT	WT
ACH-000959	SNUC4_LARGE_INTESTINE			SIDM00500	colorectal	35.0	male	583.5595208999999	carcinoma	Asian	KCLB	epithelial; monolayer	RPMI 1640 with L-glutamine (300mg/L), 90%; heat inactivated fetal bovine serum (FBS),10%	nan	27 hrs	nan	Colorectal:Carcinoma	COAD/READ		0.0272417			-5.19804				0.0529265				chrX_76939523-76939523_A>G	silent	p.L409L	WT	WT	WT	chr17_7577548-7577548_C>T	other non-conserving	nan	WT	WT	WT	chr2_209108185-209108185_G>A	other non-conserving	p.R222C	chr7_140624440-140624440_C>T	other non-conserving	p.D22N	WT
ACH-001484	CI_HAEMATOPOIETIC_AND_LYMPHOID_TISSUE			nan	blood																										WT	WT	WT	WT	WT	WT	WT	WT	WT	WT	WT	WT	WT	WT	WT	WT	WT	WT	WT
ACH-002328	MX1_BREAST			nan	breast
ACH-000416	NCIH838_LUNG	NCIH838_LUNG	910399	SIDM01150	lung	59.0	male	111.31589790000001	carcinoma	Caucasian	ATCC	Adherent	RPMI+10%FBS	5% DMSO	nan	42.9	Lung:NSCLC_Adeno	LUAD	1.89172		0.0630209	0.919695		-3.98803	-3.98803	-0.670897		-0.717954	-0.216704	-0.443801	WT	WT	WT	WT	WT	WT	chr17_7579503-7579503_C>A	damaging	p.E62*	WT	WT	WT	WT	WT	WT	WT	WT	WT	WT
ACH-001398	SW156_KIDNEY	SW156_KIDNEY	1240220	SIDM01162	kidney	nan	nan	nan	nan	nan	nan	nan	nan	nan	nan	nan	nan	KIRC			0.128581			-2.95925	-4.34662			0.167169	-0.600372	-0.600372	WT	WT	WT	WT	WT	WT	WT	WT	WT	chr3_10188315-10188315_T>-	damaging	p.L153fs	WT	WT	WT	WT	WT	WT	WT
ACH-001450	BLUE1_HAEMATOPOIETIC_AND_LYMPHOID_TISSUE			nan	lymphocyte																										WT	WT	WT	WT	WT	WT	chr17_7577120-7577120_C>T	other non-conserving	p.R273H	WT	WT	WT	WT	WT	WT	WT	WT	WT	WT
ACH-001064	EB2_HAEMATOPOIETIC_AND_LYMPHOID_TISSUE	EB2_HAEMATOPOIETIC_AND_LYMPHOID_TISSUE	906846	SIDM00863	lymphocyte	7.0	female	nan	lymphoid_neoplasm	African_american	nan	nan	nan	nan	nan	nan	nan	nan			0.0922621			-3.43812	-3.43812			-0.244832	0.37166	0.37166	WT	WT	WT	WT	WT	WT	chr17_7577550-7577550_C>T	other non-conserving	p.G244D	WT	WT	WT	WT	WT	WT	WT	WT	WT	WT
ACH-000356	MKN45_STOMACH	MKN45_STOMACH	925340	SIDM00247	gastric	62.0	female	130.5479853	carcinoma	Asian	HSRRB	nan	nan	nan	nan	nan	Gastric:Carcinoma	STAD	2.06841		0.197128	1.04852		-2.3428	-3.73016	-0.536934		0.697546	0.0591931	-0.23887	chrX_76814155-76814155_A>G	silent	p.Y2163Y	WT	WT	WT	chr17_7579359-7579359_G>A	other non-conserving	p.R110C	WT	WT	WT	WT	WT	WT	WT	WT	WT	WT
ACH-002353	LB2241EBV_MATCHED_NORMAL_TISSUE	LB2241EBV_Matched_Normal_Tissue		nan	non_cancerous																0.0683002			-3.87197	-3.87197			-0.6181	-0.0925285	-0.0925285	WT	WT	WT	WT	WT	WT	WT	WT	WT	WT	WT	WT	WT	WT	WT	WT	WT	WT	WT
ACH-001377	PACADD137_PANCREAS			nan	pancreas																										WT	WT	WT	WT	WT	WT	WT	WT	WT	WT	WT	WT	WT	WT	WT	WT	WT	WT	WT
ACH-000283	A1207_CENTRAL_NERVOUS_SYSTEM			nan	central_nervous_system	nan	female	nan	glioma	Caucasian	nan	nan	nan	nan	nan	nan	nan	nan													WT	WT	WT	WT	WT	WT	WT	WT	WT	WT	WT	WT	WT	WT	WT	chr7_140453136-140453136_A>T	other non-conserving	p.V600E	WT
ACH-000694	TE9_OESOPHAGUS	TE9_OESOPHAGUS	946353	SIDM00325	esophagus	nan	male	161.03050190000002	carcinoma	Asian	RIKEN	Adherent	RPMI 1640 + 10%FBS	5% DMSO	nan	106.5	Oesophagus:Carcinoma	ESCA			0.203294			-2.29836	-3.68573			0.735777	0.106736	0.106736	chrX_76888777-76888777_C>T	silent	p.E1684E	WT	WT	WT	chr17_7577137-7577137_C>-	damaging	p.R267fs	WT	WT	WT	WT	WT	WT	WT	WT	WT	WT
ACH-000199	HS255T_FIBROBLAST			nan	fibroblast	46.0	female	123.70113810000001	carcinoma	Caucasian	NIBRI	nan	nan	nan	nan	nan	nan	nan		0.0292524			-5.0953				0.264421				WT	WT	WT	WT	WT	WT	WT	WT	WT	chr3_10183665-10183665_C>G	other non-conserving	p.P45R	WT	WT	WT	WT	WT	WT	WT
ACH-000670	SBC5_LUNG	SBC5_LUNG	713880	SIDM00368	lung	nan	nan	180.36600790000003	carcinoma	Asian	HSRRB	Adherent	EMEM+10%FBS	5% DMSO	nan	44.01717	Lung:SCLC	SCLC	6.0186		0.327567	2.58943		-1.61014	-2.9975	1.06545		1.3279	0.843087	0.954267	WT	WT	WT	WT	WT	WT	chr17_7577538-7577538_C>A	other non-conserving	p.R248L	WT	WT	WT	WT	WT	WT	WT	WT	WT	WT
ACH-000621	MDAMB157_BREAST	MDAMB157_BREAST	925338	SIDM00529	breast	44.0	female	136.815293	carcinoma	African_american	ATCC	Adherent	RPMI+10%FBS	5%DMSO	nan	106.4	Breast:Carcinoma	BRCA	1.04678		0.113607	0.0659597		-3.13788	-4.52524	-1.55869		0.0134859	-0.79149	-1.17509	WT	WT	WT	WT	WT	WT	chr17_7579401-7579426_AAGATGACAGGGGCCAGGAGGGGGCT>-	damaging	p.APSWPLSSS88fs	WT	WT	WT	WT	WT	WT	WT	WT	WT	WT
ACH-000362	MOLM13_HAEMATOPOIETIC_AND_LYMPHOID_TISSUE	MOLM13_HAEMATOPOIETIC_AND_LYMPHOID_TISSUE	1330947	SIDM00437	blood	20.0	male	147.478632	haematopoietic_neoplasm	Asian	DSMZ	suspension; dt=50hrs	RPMI-1640+20%FBS	5% DMSO	50 hrs	60.6	Leukemia:AML	LAML		0.0232687	0.0596659		-5.42547	-4.06695	-4.06695		-0.41525	-0.785857	-0.301147	-0.301147	WT	WT	WT	WT	WT	WT	WT	WT	WT	WT	WT	WT	WT	WT	WT	WT	WT	WT	WT
ACH-000902	CAL148_BREAST	CAL148_BREAST	924106	SIDM00938	breast	58.0	female	280.808519	carcinoma	Caucasian	DSMZ	Epitheloid cells as single cells or as clumps in suspension and monolayer	DMEM+20%FBS	nan	30-40hrs	60.0	Breast:Carcinoma	BRCA			0.172453			-2.53572	-3.92309			0.531557	-0.147228	-0.147228	WT	WT	WT	WT	WT	WT	chr17_7578179-7578179_C>T	other non-conserving	p.E224K	WT	WT	WT	WT	WT	WT	WT	WT	WT	WT
ACH-000710	NCIH854_LUNG			nan	lung	nan	nan	158.1433375	carcinoma	Caucasian	KCLB	suspention	RPMI 1640 with L-glutamine (300mg/L), 90%; heat inactivated fetal bovine serum (FBS),10%	nan	nan	nan	Lung:NSCLC_Adeno	LUAD													WT	WT	WT	WT	WT	WT	chr17_7577085-7577085_C>T	other non-conserving	p.E285K	WT	WT	WT	WT	WT	WT	chr7_140453136-140453136_A>T	other non-conserving	p.V600E	WT
ACH-000212	CAL120_BREAST	CAL120_BREAST	906826	SIDM00940	breast	43.0	female	99.29632008	carcinoma	Caucasian	DSMZ	ADHERENT CELLS, GROWING IN MONOLAYERS	DMEM+ 10% FBS	5% DMSO	nan	52.4	Breast:Carcinoma	BRCA	4.51938		0.236705	2.17612		-2.07884	-3.4662	0.635656		0.924647	0.34161	0.488633	WT	WT	WT	chr6_33289532-33289532_T>C	silent	p.K57K	chr17_7578175-7578175_A>C	damaging	nan	WT	WT	WT	WT	WT	WT	WT	WT	WT	WT
ACH-001418	UWB1289_OVARY	UWB1289_OVARY	1480374	SIDM00815	ovary	nan	nan	nan	nan	nan	nan	nan	nan	nan	nan	nan	nan	OV			0.0799542			-3.64468	-3.64468			-0.422553	0.15065	0.15065	WT	WT	WT	WT	WT	WT	chr17_7578222-7578223_TC>-	damaging	p.R209fs	WT	WT	WT	WT	WT	WT	WT	WT	WT	WT
ACH-000761	NUGC2_STOMACH			nan	gastric	56.0	female	218.01487749999998	carcinoma	Asian	NIBRI	nan	nan	nan	nan	nan	Gastric:Carcinoma	STAD		0.0295636			-5.08003				0.295854				WT	WT	WT	WT	WT	WT	chr17_7577548-7577548_C>T	other non-conserving	nan	WT	WT	WT	WT	WT	WT	WT	WT	WT	WT
ACH-000770	P31FUJ_HAEMATOPOIETIC_AND_LYMPHOID_TISSUE	P31FUJ_HAEMATOPOIETIC_AND_LYMPHOID_TISSUE	909253	SIDM00363	blood	nan	male	220.9309703	haematopoietic_neoplasm	Asian	HSSRB	lymphocyte-like	RPMI 1640 medium with 10% fetal calf serum	nan	nan	nan	Leukemia:AML	LAML			0.341111			-1.55169	-1.55169			1.37819	2.39001	2.39001	chrX_76855019-76855019_T>-	damaging	p.K1939fs	WT	WT	WT	chr17_7577574-7577574_T>C,chr17_7578263-7578263_G>A	other non-conserving,damaging	p.Y236C,p.R196*	WT	WT	WT	WT	WT	WT	WT	WT	WT	WT
ACH-000333	JHOM2B_OVARY			nan	ovary	nan	female	142.7412221	carcinoma	Asian	RIKEN	epithelial-like	(DMEM:HamF12=1:1) + 10%FBS	nan	nan	nan	Ovary:Carcinoma	OV													WT	WT	WT	WT	WT	WT	chr17_7577114-7577114_C>A	other non-conserving	p.C275F	WT	WT	WT	WT	WT	WT	chr7_140453136-140453136_A>T	other non-conserving	p.V600E	WT
ACH-001443	ASH3_THYROID	ASH3_THYROID	1290722	SIDM00491	thyroid	nan	nan	nan	nan	nan	nan	nan	nan	nan	nan	nan	nan	THCA			0.14144			-2.82174	-2.82174			0.285481	1.03115	1.03115	WT	WT	WT	WT	WT	WT	chr17_7578394-7578394_T>C	other non-conserving	p.H179R	WT	WT	WT	WT	WT	WT	WT	WT	WT	WT
ACH-002325	LY2_BREAST			nan	breast
ACH-001173	R262_CENTRAL_NERVOUS_SYSTEM			nan	central_nervous_system																										WT	WT	WT	WT	WT	WT	chr17_7577120-7577120_C>T	other non-conserving	p.R273H	WT	WT	WT	WT	WT	WT	WT	WT	WT	WT
ACH-002176	NCIH748_LUNG	NCIH748_LUNG	909194	SIDM01117	lung	nan	nan	nan	nan	nan	nan	nan	nan	nan	nan	nan	nan	SCLC			0.131242			-2.9297	-4.31706			0.192595	-0.568754	-0.568754	WT	WT	WT	WT	WT	WT	chr17_7578190-7578190_T>C	other non-conserving	p.Y220C	WT	WT	WT	WT	WT	WT	WT	WT	WT	WT
ACH-000482	RERFLCKJ_LUNG	RERFLCKJ_LUNG	1298537	SIDM00356	lung	78.0	male	161.33233869999998	carcinoma	Asian	HSSRB	adherent epithelial-like	RPMI-1640+10% FBS	5% DMSO	53hrs	56.5	Lung:NSCLC_Others	LUAD			0.105774			-3.24094	-3.24094			-0.0751892	0.582624	0.582624	WT	WT	WT	WT	WT	WT	chr17_7578177-7578177_C>A	damaging	p.E224D	WT	WT	WT	WT	WT	WT	WT	WT	WT	WT
ACH-000816	NCIH524_LUNG	NCIH524_LUNG	908483	SIDM01129	lung	63.0	male	187.20213619999998	carcinoma	Caucasian	ATCC	Suspension	RPMI-1640+10%FBS	5% DMSO	nan	425.0	Lung:SCLC	SCLC	2.63815		0.0840607	1.39953		-3.57242	-3.57242	-0.17192		-0.360385	0.227961	0.0280202	WT	WT	WT	WT	WT	WT	chr17_7578466-7578466_G>T	other non-conserving	p.T155N	WT	WT	WT	WT	WT	WT	WT	WT	WT	WT
ACH-002363	NCIBL1395_MATCHED_NORMAL_TISSUE	NCIBL1395_Matched_Normal_Tissue		SIDM00643	non_cancerous																0.0531029			-4.23507	-4.23507			-0.930498	-0.48102	-0.48102	WT	WT	WT	WT	WT	WT	WT	WT	WT	WT	WT	WT	WT	WT	WT	chr7_140481402-140481402_C>G	other non-conserving	p.G469A	WT
ACH-001232	UW228_CENTRAL_NERVOUS_SYSTEM			nan	central_nervous_system																										WT	WT	WT	WT	WT	WT	chr17_7578466-7578466_G>T	other non-conserving	p.T155N	chr3_10183723-10183723_C>T	silent	p.R64R	WT	WT	WT	WT	WT	WT	WT
ACH-001059	DL_SOFT_TISSUE			nan	soft_tissue																										WT	WT	WT	WT	WT	WT	WT	WT	WT	WT	WT	WT	WT	WT	WT	WT	WT	WT	WT
ACH-000339	HCC461_LUNG			nan	lung	nan	nan	nan	nan	nan	nan	nan	nan	nan	nan	nan	nan	nan													WT	WT	WT	WT	WT	WT	chr17_7577063-7577063_T>A,chr17_7577066-7577066_T>A,chr17_7577067-7577067_T>A,chr17_7577138-7577138_C>T,chr17_7578485-7578485_A>-	other non-conserving,other non-conserving,damaging,other non-conserving,damaging	p.K292I,p.K291M,p.K291*,p.R267Q,p.S149fs	WT	WT	WT	WT	WT	WT	WT	WT	WT	WT
ACH-002367	NCIBL2052_MATCHED_NORMAL_TISSUE	NCIBL2052_Matched_Normal_Tissue		SIDM00712	non_cancerous																0.0611971			-4.03039	-4.03039			-0.754405	-0.262034	-0.262034	WT	WT	WT	WT	WT	WT	WT	WT	WT	WT	WT	WT	WT	WT	WT	WT	WT	WT	WT
ACH-000454	HCC95_LUNG			nan	lung	65.0	male	115.3890534	carcinoma	Caucasian	KCLB	epithelial; monolayer	RPMI 1640 with L-glutamine (300mg/L), 90%; heat inactivated fetal bovine serum (FBS),10%	nan	nan	nan	Lung:NSCLC_Squamous	LUSC	2.1025			1.07211				-0.512403				-0.512403	WT	WT	WT	chr6_33289755-33289755_C>T	damaging	nan	chr17_7574025-7574025_C>-	damaging	p.G334fs	WT	WT	WT	WT	WT	WT	WT	WT	WT	WT
ACH-002334	SS1A_SOFT_TISSUE			nan	soft_tissue
ACH-001354	LAN2_AUTONOMIC_GANGLIA			nan	peripheral_nervous_system																										WT	WT	WT	WT	WT	WT	chr17_7574018-7574018_G>A	other non-conserving	p.R337C	WT	WT	WT	WT	WT	WT	WT	WT	WT	WT
ACH-001355	LAN6_AUTONOMIC_GANGLIA	LAN6_AUTONOMIC_GANGLIA	949170	SIDM00330	peripheral_nervous_system	nan	nan	nan	nan	nan	nan	nan	nan	nan	nan	nan	nan	NB			0.711975			-0.490102	-0.490102			2.29154	3.52584	3.52584	WT	WT	WT	WT	WT	WT	chr17_7578475-7578475_G>A	other non-conserving	p.P152L	WT	WT	WT	WT	WT	WT	WT	WT	WT	WT
ACH-000994	HEC59_ENDOMETRIUM			nan	uterus	nan	female	1614.8996869999999	carcinoma	Asian	HSSRB	epithelial-like	Eagle's minimal essential medium with 15% fetal calf serum	nan	nan	nan	Endometrium:Carcinoma	UCEC		0.0277195			-5.17296				0.104563				WT	WT	WT	chr6_33287609-33287609_G>-,chr6_33288332-33288332_C>T	damaging,other non-conserving	p.P496fs,p.R359Q	chr17_7577120-7577120_C>T,chr17_7579403-7579403_G>A	other non-conserving,other non-conserving	p.R273H,p.S95F	chr3_10183629-10183629_C>T	other non-conserving	p.S33L	WT	WT	WT	WT	WT	WT	WT
ACH-002212	BB30HNC_UPPER_AERODIGESTIVE_TRACT	BB30HNC_UPPER_AERODIGESTIVE_TRACT	753531	SIDM00172	upper_aerodigestive	nan	nan	nan	nan	nan	nan	nan	nan	nan	nan	nan	nan	HNSC			0.355067			-1.49384	-2.8812			1.42796	0.967522	0.967522	WT	WT	WT	WT	WT	WT	chr17_7578382-7578382_G>T,chr17_7579698-7579698_A>C	damaging,damaging	p.S183*,nan	WT	WT	WT	WT	WT	WT	WT	WT	WT	WT
ACH-000007	LS513_LARGE_INTESTINE	LS513_LARGE_INTESTINE	907795	SIDM00677	colorectal	63.0	male	112.3495388	carcinoma	Caucasian	nan	nan	nan	nan	nan	nan	Colorectal:Carcinoma	COAD/READ	2.15334		0.11224	1.10657		-3.15534	-4.54271	-0.476562		-0.00154025	-0.810176	-0.643369	WT	WT	WT	WT	WT	WT	WT	WT	WT	WT	WT	WT	WT	WT	WT	chr7_140507860-140507861_TC>AA,chr7_140507861-140507861_C>A	damaging,damaging	p.E204L,p.E204*	WT
ACH-000439	ME1_HAEMATOPOIETIC_AND_LYMPHOID_TISSUE	ME1_HAEMATOPOIETIC_AND_LYMPHOID_TISSUE	1330942	SIDM00338	blood	40.0	male	166.15643740000002	haematopoietic_neoplasm	Asian	DSMZ	SINGLE IN SUSPENSION	RPMI-1640+10% FBS	5% DMSO	nan	142.8	Leukemia:AML	LAML		0.0237173	0.0999721		-5.39792	-3.32233	-3.32233		-0.358538	-0.145212	0.495545	0.495545	WT	WT	WT	WT	WT	WT	WT	WT	WT	WT	WT	WT	WT	WT	WT	WT	WT	WT	WT
ACH-000473	RT112_URINARY_TRACT	RT112_URINARY_TRACT	909704	SIDM00402	urinary_tract	nan	female	116.3492966	carcinoma	Caucasian	DSMZ	Adherent	RPMI +10%FBS	5%DMSO	nan	36.1	Bladder:Carcinoma	BLCA	5.27846		0.123457	2.40012		-3.01792	-3.01792	0.868586		0.116693	0.821244	0.844915	chrX_76812932-76812932_A>G	other non-conserving	p.M2230T	WT	WT	WT	chr17_7577538-7577538_C>T,chr17_7578382-7578382_G>C,chr17_7578406-7578406_C>T	other non-conserving,damaging,other non-conserving	nan,p.S183*,p.R175H	WT	WT	WT	WT	WT	WT	WT	WT	WT	WT
ACH-000174	CAL62_THYROID	CAL62_THYROID	906828	SIDM00931	thyroid	70.0	female	89.02444689	carcinoma	Caucasian	DSMZ	epithelial-like cells growing in monolayers	DMEM + 10% FBS	10%DMSO	~ 24 hrs	26.0	Thyroid:Carcinoma	THCA			0.186442			-2.4232	-2.4232			0.628368	1.45755	1.45755	WT	WT	WT	WT	WT	WT	chr17_7578448-7578448_G>T	other non-conserving	p.A161D	WT	WT	WT	WT	WT	WT	WT	WT	WT	WT
ACH-002158	LU99A_LUNG		907796	SIDM01219	lung
ACH-001350	HTCC3_THYROID	HTCC3_THYROID	924151	SIDM00496	thyroid	nan	nan	nan	nan	nan	nan	nan	nan	nan	nan	nan	nan	THCA			0.0637846			-3.97065	-3.97065			-0.703003	-0.198111	-0.198111	WT	WT	WT	WT	WT	WT	chr17_7578475-7578475_G>A	other non-conserving	p.P152L	WT	WT	WT	WT	WT	WT	chr7_140453136-140453136_A>T	other non-conserving	p.V600E	WT
ACH-000552	HT29_LARGE_INTESTINE	HT29_LARGE_INTESTINE	905939	SIDM00136	colorectal	44.0	female	110.86306499999999	carcinoma	Caucasian	NIBRI	nan	nan	nan	nan	nan	Colorectal:Carcinoma	COAD/READ	6.43044		0.277873	2.68492		-1.8475	-3.23487	1.16475		1.12368	0.589123	0.876936	WT	WT	WT	WT	WT	WT	chr17_7577120-7577120_C>T	other non-conserving	p.R273H	WT	WT	WT	WT	WT	WT	chr7_140453136-140453136_A>T,chr7_140534557-140534557_G>C	other non-conserving,other non-conserving	p.V600E,p.T119S	WT
ACH-001456	C125PM_LARGE_INTESTINE			nan	colorectal																										WT	WT	WT	WT	WT	WT	WT	WT	WT	WT	WT	WT	WT	WT	WT	WT	WT	WT	WT
ACH-000489	SW1116_LARGE_INTESTINE	SW1116_LARGE_INTESTINE	909746	SIDM00835	colorectal	73.0	male	94.37319183	carcinoma	Caucasian	ATCC	Adherent	L15+10%FBS	5%DMSO	nan	123.2	Colorectal:Carcinoma	COAD/READ			0.113369			-3.1409	-4.52827			0.0108828	-0.794727	-0.794727	WT	WT	WT	WT	WT	WT	chr17_7578454-7578454_G>T	other non-conserving	p.A159D	WT	WT	WT	WT	WT	WT	WT	WT	WT	WT
ACH-002220	CROAP2_HAEMATOPOIETIC_AND_LYMPHOID_TISSUE	CROAP2_HAEMATOPOIETIC_AND_LYMPHOID_TISSUE	906807	SIDM00952	lymphoma	nan	nan	nan	nan	nan	nan	nan	nan	nan	nan	nan	nan	DLBC			0.0415551			-4.58883	-4.58883			-1.23487	-0.859525	-0.859525	WT	WT	WT	WT	WT	WT	WT	WT	WT	WT	WT	WT	WT	WT	WT	WT	WT	WT	WT
ACH-000126	KG1C_CENTRAL_NERVOUS_SYSTEM			SIDM00784	central_nervous_system	13.0	male	108.94911019999999	glioma	Asian	HSRRB	Adherent	DMEM + 10% FBS	5% DMSO	nan	111.4	CNS:Glioma_HighGrade	GBM		0.0228582			-5.45114				-0.468105				WT	WT	WT	WT	WT	WT	WT	WT	WT	WT	WT	WT	WT	WT	WT	chr7_140453136-140453136_A>T	other non-conserving	p.V600E	WT
ACH-000324	JHOC5_OVARY			nan	ovary	nan	female	155.14955480000003	carcinoma	Asian	RIKEN	epithelial-like	(DMEM: HamF12=1:1) +10%FBS	nan	nan	nan	Ovary:Carcinoma	OV		0.019888			-5.65196				-0.881496				WT	WT	WT	WT	WT	WT	WT	WT	WT	WT	WT	WT	WT	WT	WT	WT	WT	WT	WT
ACH-000794	BICR22_UPPER_AERODIGESTIVE_TRACT	BICR22_UPPER_AERODIGESTIVE_TRACT	1240121	SIDM00485	upper_aerodigestive	nan	male	178.58467869999998	carcinoma	Caucasian	ECACC	adherent; epithelial, keratinocyte	DMEM+20% FBS	5%DMSO	nan	66.0	Upper_Aerodigestive_Tract:Carcinoma	HNSC			0.129349			-2.95066	-4.33803			0.174561	-0.59118	-0.59118	WT	WT	WT	WT	WT	WT	chr17_7576926-7576927_GC>AA,chr17_7576927-7576927_C>A,chr17_7579355-7579362_AGACGGAA>-	damaging,damaging,damaging	p.G307V,nan,p.FRL109fs	WT	WT	WT	WT	WT	WT	chr7_140624417-140624417_G>A	silent	p.A29A	WT
ACH-001072	GRM_SKIN			SIDM00468	skin	36.0	male	nan	malignant_melanoma	Asian	nan	nan	nan	nan	nan	nan	nan	SKCM													WT	WT	WT	WT	WT	WT	chr17_7578536-7578536_T>G	other non-conserving	p.K132Q	WT	WT	WT	WT	WT	WT	chr7_140500166-140500166_T>C	other non-conserving	p.I326V	WT
ACH-000775	NCIH727_LUNG	NCIH727_LUNG	724855	SIDM01119	lung	65.0	female	165.1770758	carcinoid-endocrine_tumour	Caucasian	ATCC	adherent	RPMI 1640 +10% FBS	5%DMSO	nan	65.6	Endocrine	nan			0.100685			-3.31208	-4.69945			-0.136392	-0.977875	-0.977875	WT	WT	WT	WT	WT	WT	chr17_7578433-7578434_->ACTGCTTGT	other non-conserving	p.165_166insYKQ	WT	WT	WT	WT	WT	WT	WT	WT	WT	WT
ACH-000830	NCIH1436_LUNG	NCIH1436_LUNG	908469	SIDM00697	lung	39.0	male	199.57717649999998	carcinoma	Caucasian	ATCC	suspension	DMEM:F12(1:1) + 10%FBS	5% DMSO	nan	56.2	Lung:SCLC	SCLC	0.773689	0.0159644	0.0423117	-0.370175	-5.969	-4.5628	-4.5628	-2.01223	-1.53415	-1.21247	-0.831673	-1.42195	WT	WT	WT	WT	WT	WT	chr17_7578393-7578393_A>C	other non-conserving	p.H179Q	WT	WT	WT	WT	WT	WT	WT	WT	WT	WT
ACH-001131	MS1_SKIN		753594	SIDM00408	skin																										WT	WT	WT	WT	WT	WT	chr17_7577551-7577551_C>T	other non-conserving	p.G244S	WT	WT	WT	WT	WT	WT	WT	WT	WT	WT
ACH-000247	OCUM1_STOMACH	OCUM1_STOMACH	1298358	SIDM00568	gastric	38.0	female	133.8681685	carcinoma	Asian	NIBRI	nan	nan	nan	nan	nan	Gastric:Carcinoma	STAD	1.42793		0.0382225	0.513921		-4.70943	-4.70943	-1.09286		-1.33863	-0.988562	-1.04071	WT	WT	WT	WT	WT	WT	chr17_7579705-7579705_C>T	other non-conserving	p.V31I	WT	WT	WT	WT	WT	WT	WT	WT	WT	WT
ACH-000210	CADOES1_BONE	CADOES1_BONE	753539	SIDM00961	bone	19.0	female	129.370936	Ewings_sarcoma-peripheral_primitive_neuroectodermal_tumour	Asian	DSMZ	round or fusiform cells growing in clumps as adherent or semi-adherent multicellular spheroids	90% RPMI 1640 +10% h.i.FBS	10%DMSO	~ 35 hrs	103.9	Bone:Sarcoma_Ewing	SARC		0.0282281	0.0704274		-5.14673	-3.82772	-3.82772		0.158564	-0.580032	-0.0451871	-0.0451871	WT	WT	WT	WT	WT	WT	WT	WT	WT	WT	WT	WT	WT	WT	WT	WT	WT	WT	WT
ACH-001234	VMRCLCP_LUNG			nan	lung	nan	nan	nan	carcinoma	Caucasian	HSRRB	mixed cells	EMEM+10% FBS	5% DMSO	nan	nan	nan	nan													chrX_76888828-76888828_G>A	silent	p.Y1667Y	WT	WT	WT	chr17_7578461-7578461_C>A	other non-conserving	p.V157F	WT	WT	WT	WT	WT	WT	WT	WT	WT	WT
ACH-000785	NCIH2126_LUNG	NCIH2126_LUNG		SIDM00775	lung	65.0	male	177.9362885	carcinoma	Caucasian	ATCC	adherent epithelial	DMEM:HAM's F12 1:1 +5% FBS	5%DMSO	nan	423.2	Lung:NSCLC_Adeno	LUAD			0.121456			-3.04149	-4.42886			0.0964097	-0.688368	-0.688368	WT	WT	WT	WT	WT	WT	chr17_7579503-7579503_C>A	damaging	p.E62*	WT	WT	WT	WT	WT	WT	WT	WT	WT	WT
ACH-001409	UMUC16_URINARY_TRACT			nan	urinary_tract																										WT	WT	WT	WT	WT	WT	chr17_7578389-7578395_GCTCATG>-	damaging	p.HER179fs	WT	WT	WT	WT	WT	WT	WT	WT	WT	WT
ACH-002348	DIPG007_CENTRAL_NERVOUS_SYSTEM			nan	unknown																										WT	WT	WT	WT	WT	WT	WT	WT	WT	WT	WT	WT	WT	WT	WT	WT	WT	WT	WT
ACH-000049	HEKTE_KIDNEY			nan	engineered_kidney	nan	nan	69.89031879	other	Caucasian	nan	nan	nan	nan	nan	nan	nan	KIRC													WT	WT	WT	WT	WT	WT	WT	WT	WT	WT	WT	WT	WT	WT	WT	WT	WT	WT	WT
ACH-000238	SCC4_UPPER_AERODIGESTIVE_TRACT	SCC4_UPPER_AERODIGESTIVE_TRACT	910904	SIDM01081	upper_aerodigestive	55.0	male	97.45092224	carcinoma	Caucasian	NIBRI	nan	nan	nan	nan	nan	Upper_Aerodigestive_Tract:Carcinoma	HNSC	1.29471		0.0260151	0.372632		-5.26451	-5.26451	-1.23979		-1.81619	-1.58245	-1.41112	WT	WT	WT	WT	WT	WT	chr17_7578479-7578479_G>A	other non-conserving	p.P151S	WT	WT	WT	WT	WT	WT	WT	WT	WT	WT
ACH-000198	EOL1_HAEMATOPOIETIC_AND_LYMPHOID_TISSUE	EOL1_HAEMATOPOIETIC_AND_LYMPHOID_TISSUE	906856	SIDM00277	blood	33.0	male	93.78945683	haematopoietic_neoplasm	Caucasian	DSMZ	(relatively small) round cells growing in suspention, singly or in small clusters	90% RPMI 1640 +10% h.i. FBS	nan	~ 60 hrs	64.5	Leukemia:AML	LAML	1.42236		0.0527173	0.508288		-4.24558	-4.24558	-1.09872		-0.939544	-0.49227	-0.795494	WT	WT	WT	WT	WT	WT	WT	WT	WT	WT	WT	WT	WT	WT	WT	WT	WT	WT	WT
ACH-000065	OCIAML5_HAEMATOPOIETIC_AND_LYMPHOID_TISSUE	OCIAML5_HAEMATOPOIETIC_AND_LYMPHOID_TISSUE	1330983	SIDM00461	blood	77.0	male	86.42270075	haematopoietic_neoplasm	Caucasian	DSMZ	round cells growing singly or in clumps in suspention	70% alpha-MEM + 20% h. i. FBS	nan	~ 30-50 hrs	nan	Leukemia:AML	LAML		0.0284223	0.234015		-5.13683	-2.09533	-2.09533		0.178933	0.91046	1.80836	1.80836	WT	WT	WT	WT	WT	WT	WT	WT	WT	WT	WT	WT	WT	WT	WT	WT	WT	WT	WT
ACH-001075	NCIH292_LUNG	NCIH292_LUNG	753604	SIDM00493	lung	32.0	female	117.71914199999999	carcinoma	African_american	NIBRI	nan	nan	nan	nan	nan	Lung:Others	nan			0.241173			-2.05186	-3.43923			0.947858	0.370475	0.370475	WT	WT	WT	WT	WT	WT	WT	WT	WT	WT	WT	WT	WT	WT	WT	WT	WT	WT	WT
ACH-000743	CORL95_LUNG	CORL95_LUNG	1297439	SIDM00521	lung	64.0	male	147.0863414	carcinoma	Caucasian	ECACC	SUSPENSION	RPMI-1640+10% FBS	5%DMSO	nan	123.4	Lung:SCLC	SCLC		0.028468	0.112821		-5.13451	-3.14789	-3.14789		0.183703	0.00486837	0.682182	0.682182	WT	WT	WT	chr6_33288915-33288915_A>G	other non-conserving	p.S213P	chr17_7577506-7577506_C>A	other non-conserving	p.D259Y	WT	WT	WT	WT	WT	WT	WT	WT	WT	WT
ACH-000388	NUDHL1_HAEMATOPOIETIC_AND_LYMPHOID_TISSUE			nan	lymphocyte	73.0	male	124.3967492	lymphoid_neoplasm	Caucasian	DSMZ	single, round to polymorph in suspention	80-90% RPMI 1640+ 10-20% h. i. FBS	nan	~ 50 hrs	nan	Lymphoma:NH_B_cell	DLBC		0.0228358			-5.45256				-0.471013				WT	WT	WT	WT	WT	WT	chr17_7577538-7577538_C>T	other non-conserving	nan	WT	WT	WT	WT	WT	WT	WT	WT	WT	WT
ACH-000002	HL60_HAEMATOPOIETIC_AND_LYMPHOID_TISSUE	HL60_HAEMATOPOIETIC_AND_LYMPHOID_TISSUE	905938	SIDM00829	blood	35.0	female	81.13367296	haematopoietic_neoplasm	Caucasian	ATCC	suspension; do not allow cell concentration to exceed 1e6cells/ml	IMDM+20 % FBS	5%DMSO	nan	113.3	Leukemia:AML	LAML			0.124514			-3.00562	-3.00562			0.127275	0.834404	0.834404	WT	WT	WT	WT	WT	WT	WT	WT	WT	WT	WT	WT	WT	WT	WT	WT	WT	WT	WT
ACH-001606	NO11_CENTRAL_NERVOUS_SYSTEM	NO11_CENTRAL_NERVOUS_SYSTEM	908450	SIDM00573	central_nervous_system	nan	nan	nan	nan	nan	nan	nan	nan	nan	nan	nan	nan	LGG			0.132976			-2.91076	-4.29813			0.208887	-0.548493	-0.548493	WT	WT	WT	WT	WT	WT	chr17_7577121-7577121_G>A	other non-conserving	p.R273C	WT	WT	WT	WT	WT	WT	WT	WT	WT	WT
ACH-000379	NCIH1781_LUNG	NCIH1781_LUNG	1298350	SIDM00754	lung	66.0	female	89.94197218	carcinoma	Caucasian	ATCC	Adherent	nan	5%DMSO	nan	197.3	Lung:NSCLC_Adeno	LUAD			0.130942			-2.933	-4.32037			0.189754	-0.572286	-0.572286	WT	WT	WT	WT	WT	WT	chr17_7578461-7578461_C>A	other non-conserving	p.V157F	WT	WT	WT	WT	WT	WT	WT	WT	WT	WT
ACH-000870	NCIH1930_LUNG			nan	lung	41.0	male	237.0403961	carcinoma	Caucasian	ATCC	Mixed line, majority in suspension	RPMI 1640 +10% FBS	5%DMSO	nan	nan	Lung:SCLC	SCLC	1.53249			0.615882				-0.986831				-0.986831	chrX_76937124-76937124_T>C	other non-conserving	p.I1208M	chr6_33287860-33287860_C>A	damaging	p.E465*	chr17_7577548-7577548_C>G	other non-conserving	p.G245R	WT	WT	WT	WT	WT	WT	WT	WT	WT	WT
ACH-000584	JHOS4_OVARY	JHOS4_OVARY	1480359	SIDM00303	ovary	44.0	female	160.5655743	carcinoma	Asian	RIKEN	nan	DMEM:F12 + 10% FBS	5% DMSO	nan	127.3	Ovary:Carcinoma	OV		0.0196433	0.0678685		-5.66982	-3.88111	-3.88111		-0.91827	-0.625971	-0.102316	-0.102316	chrX_76812975-76812975_C>G,chrX_76939673-76939674_->T	other non-conserving,damaging	p.D2216H,p.L359fs	WT	WT	WT	chr17_7578490-7578490_A>C	other non-conserving	p.V147G	WT	WT	WT	WT	WT	WT	WT	WT	WT	WT
ACH-000927	BT474_BREAST	BT474_BREAST	946359	SIDM00963	breast	60.0	female	359.6409124	carcinoma	Caucasian	NIBRI	nan	nan	nan	nan	nan	Breast:Carcinoma	BRCA	2.18845		0.0941767	1.12991		-3.40849	-4.79585	-0.452299		-0.219337	-1.08102	-0.766662	WT	WT	WT	WT	WT	WT	chr17_7577085-7577085_C>T	other non-conserving	p.E285K	WT	WT	WT	WT	WT	WT	WT	WT	WT	chr17_8141357-8141357_G>A
ACH-002125	NCIH2461_PLEURA	NCIH2461_PLEURA	1290810	SIDM00102	lung	nan	nan	nan	nan	nan	nan	nan	nan	nan	nan	nan	nan	MESO			0.104302			-3.26116	-4.64853			-0.0925843	-0.923396	-0.923396	WT	WT	WT	WT	WT	WT	WT	WT	WT	WT	WT	WT	WT	WT	WT	WT	WT	WT	WT
ACH-001028	CHLA06ATRT_SOFT_TISSUE			nan	soft_tissue																										WT	WT	WT	WT	WT	WT	chr17_7578398-7578398_G>C	other non-conserving	p.H178D	WT	WT	WT	WT	WT	WT	WT	WT	WT	WT
ACH-000867	CHAGOK1_LUNG	CHAGOK1_LUNG	687596	SIDM00924	lung	45.0	male	225.7579361	carcinoma	Caucasian	ECACC	nan	nan	nan	nan	nan	Lung:Others	UNABLE TO CLASSIFY	5.03739		0.262099	2.33268		-1.93182	-3.31918	0.798454		1.05114	0.498913	0.648684	WT	WT	WT	WT	WT	WT	chr17_7577114-7577114_C>A,chr17_7578290-7578290_C>G	other non-conserving,damaging	p.C275F,nan	WT	WT	WT	WT	WT	WT	WT	WT	WT	WT
ACH-002225	D263MG_CENTRAL_NERVOUS_SYSTEM	D263MG_CENTRAL_NERVOUS_SYSTEM	946368	SIDM00732	central_nervous_system	nan	nan	nan	nan	nan	nan	nan	nan	nan	nan	nan	nan	GBM			0.116181			-3.10555	-4.49292			0.041295	-0.756907	-0.756907	WT	WT	WT	WT	WT	WT	chr17_7578406-7578406_C>T	other non-conserving	p.R175H	WT	WT	WT	WT	WT	WT	WT	WT	WT	WT
ACH-000098	GAMG_CENTRAL_NERVOUS_SYSTEM	GAMG_CENTRAL_NERVOUS_SYSTEM	906868	SIDM01055	central_nervous_system	42.0	female	74.35849532	glioma	Caucasian	DSMZ	ADHERENT, LARGE, SPINDLE-LIKE CELLS GROWING AS MONOLAYERS	DMEM+10% FBS	5% DMSO	40-50 hrs	33.0	CNS:Glioma	LGG	3.75191		0.16228	1.90762		-2.62344	-4.01081	0.356445		0.456087	-0.241081	0.0576821	WT	WT	WT	WT	WT	WT	chr17_7577144-7577144_A>G	other non-conserving	p.L265P	WT	WT	WT	WT	WT	WT	WT	WT	WT	WT
ACH-000908	SNU520_STOMACH			nan	gastric	60.0	female	354.1772098	carcinoma	Asian	KCLB	floating aggregates; suspention	RPMI 1640 with L-glutamine (300mg/L), 90%; heat inactivated fetal bovine serum (FBS),10%	nan	nan	nan	Gastric:Carcinoma	STAD		0.0156096			-6.00143				-1.60091				chrX_76778785-76778787_TCT>-	other non-conserving	p.2264_2265EE>E	WT	WT	WT	WT	WT	WT	WT	WT	WT	WT	WT	WT	WT	WT	WT	WT
ACH-002395	HUH6CLONE5_LIVER			SIDM01257	liver																										WT	WT	WT	WT	WT	WT	chr17_7577566-7577566_T>C,chr17_7578454-7578454_G>T	other non-conserving,other non-conserving	p.N239D,p.A159D	WT	WT	WT	WT	WT	WT	WT	WT	WT	WT
ACH-000650	IGR37_SKIN	IGR37_SKIN	1240153	SIDM01066	skin	26.0	male	128.2141157	malignant_melanoma	Caucasian	NIBRI	nan	nan	nan	nan	39.4	Skin:Melanoma	SKCM			0.205656			-2.28169	-3.66906			0.750115	0.124566	0.124566	WT	WT	WT	WT	WT	WT	chr17_7577594-7577595_AC>-	damaging	p.C229fs	WT	WT	WT	WT	WT	WT	chr7_140453136-140453136_A>T	other non-conserving	p.V600E	WT
ACH-002133	NCIH2810_PLEURA	NCIH2810_PLEURA	1240137	SIDM00311	lung	nan	nan	nan	nan	nan	nan	nan	nan	nan	nan	nan	nan	MESO			0.0545766			-4.19557	-4.19557			-0.896521	-0.438766	-0.438766	WT	WT	WT	WT	WT	WT	chr17_7577120-7577120_C>A	other non-conserving	p.R273L	WT	WT	WT	WT	WT	WT	WT	WT	WT	WT
ACH-000504	SNB75_CENTRAL_NERVOUS_SYSTEM	SNB75_CENTRAL_NERVOUS_SYSTEM	905982	SIDM00095	central_nervous_system	nan	nan	106.3647836	glioma	Caucasian	Garraway Lab	Adherent	RPMI-1640+ 5% FBS	5% DMSO	nan	54.0	CNS:Glioma_HighGrade	GBM			0.0307146			-5.02493	-5.02493			-1.61007	-1.32612	-1.32612	WT	WT	WT	WT	WT	WT	chr17_7577509-7577509_C>T	other non-conserving	p.E258K	WT	WT	WT	WT	WT	WT	WT	WT	WT	WT
ACH-000444	LU99_LUNG	LU99_LUNG		SIDM00546	lung	63.0	male	165.0898898	carcinoma	Asian	HSRRB	Adherent	RPMI 1640 +10% FBS	5% DMSO	nan	40.4	Lung:NSCLC_Large_Cell	nan	5.37809		0.371128	2.42709		-1.43001	-2.81738	0.896639		1.48287	1.03581	0.966225	WT	WT	WT	WT	WT	WT	WT	WT	WT	WT	WT	WT	WT	WT	WT	WT	WT	WT	WT
ACH-001607	NOZ_LIVER			nan	bile_duct																										WT	WT	WT	WT	WT	WT	chr17_7576855-7576855_G>A	damaging	p.Q331*	WT	WT	WT	WT	WT	WT	WT	WT	WT	WT
ACH-000550	IGR39_SKIN			SIDM01065	skin	26.0	male	nan	malignant_melanoma	Caucasian	DSMZ	Adherent	DMEM+15%FBS	5% DMSO	nan	40.2	Skin:Melanoma	SKCM	1.46373			0.549654				-1.0557				-1.0557	WT	WT	WT	WT	WT	WT	chr17_7577594-7577595_AC>-	damaging	p.C229fs	WT	WT	WT	WT	WT	WT	chr7_140453136-140453136_A>T	other non-conserving	p.V600E	WT
ACH-001532	JMURTK2_SOFT_TISSUE			nan	kidney																										WT	WT	WT	WT	WT	WT	WT	WT	WT	WT	WT	WT	WT	WT	WT	WT	WT	WT	WT
ACH-000631	KS1_CENTRAL_NERVOUS_SYSTEM	KS1_CENTRAL_NERVOUS_SYSTEM	907313	SIDM00555	central_nervous_system	nan	female	181.71367469999998	glioma	Asian	GNF	nan	nan	nan	nan	nan	CNS:Glioma_HighGrade	GBM			0.23675			-2.07856	-3.46593			0.924882	0.341903	0.341903	WT	WT	WT	WT	WT	WT	WT	WT	WT	WT	WT	WT	WT	WT	WT	WT	WT	WT	WT
ACH-001084	HCT8_LARGE_INTESTINE			SIDM00786	colorectal	67.0	male	nan	carcinoma	nan	nan	nan	nan	nan	nan	nan	nan	COAD/READ
ACH-000118	HUPT3_PANCREAS	HUPT3_PANCREAS	907285	SIDM00533	pancreas	66.0	male	116.55941640000002	carcinoma	Asian	DSMZ	adherent; dt=40-50hrs	EMEM+10%FBS	10% DMSO	nan	106.0	Pancreas:Carcinoma	PAAD			0.125954			-2.98903	-4.3764			0.141547	-0.632236	-0.632236	WT	WT	WT	WT	WT	WT	chr17_7577094-7577094_G>A	other non-conserving	nan	WT	WT	WT	WT	WT	WT	WT	WT	WT	WT
ACH-000840	HCC366_LUNG	HCC366_LUNG	1240144	SIDM01070	lung	80.0	female	220.21019449999997	carcinoma	Caucasian	DSMZ	Adhrent cells growing as monolayers; dt=30-40hrs	RPMI-1640+10%FBS	10% DMSO	30-40 hrs	176.0	Lung:NSCLC_Adeno	LUAD		0.0192532	0.0403477		-5.69876	-4.63137	-4.63137		-0.977844	-1.27146	-0.905039	-0.905039	WT	WT	WT	WT	WT	WT	chr17_7578190-7578190_T>C	other non-conserving	p.Y220C	WT	WT	WT	WT	WT	WT	WT	WT	WT	WT
ACH-002475	HAP1_ENGINEERED			nan	engineered_blood																										WT	WT	WT	WT	WT	WT	chr17_7578406-7578406_C>T	other non-conserving	p.R175H	WT	WT	WT	WT	WT	WT	WT	WT	WT	WT
ACH-000230	HS742T_FIBROBLAST			nan	fibroblast	71.0	female	100.72696090000001	carcinoma	Caucasian	ATCC	adherent fibroblast	DMEM+10% FBS	5% DMSO	nan	nan	nan	nan													WT	WT	WT	WT	WT	WT	WT	WT	WT	WT	WT	WT	WT	WT	WT	WT	WT	WT	WT
ACH-001960	CCSW1_BILIARY_TRACT			nan	bile_duct																										WT	WT	WT	WT	WT	WT	chr17_7577082-7577082_C>T	other non-conserving	p.E286K	WT	WT	WT	WT	WT	WT	chr7_140434435-140434435_T>A	other non-conserving	p.I755F	WT
ACH-000368	SNU1105_CENTRAL_NERVOUS_SYSTEM			nan	central_nervous_system	61.0	male	140.89290880000001	glioma	Asian	nan	nan	nan	nan	nan	nan	CNS:Glioma_HighGrade	GBM		0.028391			-5.13842				0.175657				WT	WT	WT	WT	WT	WT	chr17_7578458-7578458_G>C	other non-conserving	p.R158G	WT	WT	WT	WT	WT	WT	WT	WT	WT	WT
ACH-000957	LS180_LARGE_INTESTINE	LS180_LARGE_INTESTINE	998189	SIDM00680	colorectal	58.0	female	529.8257616000001	carcinoma	Caucasian	nan	nan	nan	nan	nan	nan	Colorectal:Carcinoma	COAD/READ	4.50197		0.297999	2.17056		-1.74662	-3.13399	0.629867		1.21047	0.69706	0.663464	WT	WT	WT	WT	WT	WT	WT	WT	WT	WT	WT	WT	WT	WT	WT	chr7_140507839-140507839_T>C	other non-conserving	p.D211G	chr17_8140744-8140744_C>T
ACH-001197	SMZ1_HAEMATOPOIETIC_AND_LYMPHOID_TISSUE			nan	lymphocyte																										WT	WT	WT	WT	WT	WT	chr17_7579349-7579349_A>G	other non-conserving	p.F113S	WT	WT	WT	WT	WT	WT	WT	WT	WT	WT
ACH-000272	SLR24_KIDNEY			nan	kidney	nan	nan	nan	carcinoma	Caucasian	nan	nan	nan	nan	nan	nan	nan	KIRC													WT	WT	WT	WT	WT	WT	WT	WT	WT	chr3_10183725-10183725_C>G	other non-conserving	p.S65W	WT	WT	WT	WT	WT	WT	WT
ACH-000693	KYSE180_OESOPHAGUS	KYSE180_OESOPHAGUS	907318	SIDM01030	esophagus	53.0	male	158.794456	carcinoma	Asian	DSMZ	EPITHELOID CELLS GROWING AS ADHERENT MONOLAYER	RPMI-1640 +10% FBS	5%DMSO	40-50 hrs	34.1	Oesophagus:Carcinoma	ESCA	3.37329		0.132283	1.75416		-2.9183	-4.30567	0.196854		0.202402	-0.556558	-0.179852	WT	WT	WT	WT	WT	WT	chr17_7578265-7578265_A>G	other non-conserving	p.I195T	WT	WT	WT	WT	WT	WT	chr7_140500166-140500166_T>C	other non-conserving	p.I326V	WT
ACH-000893	NCIH1651_LUNG	NCIH1651_LUNG	910900	SIDM00744	lung	71.0	male	272.2196239	carcinoma	Caucasian	ATCC	adherent	DMEM:F12 (1:1) + 10% FBS	5% DMSO	nan	138.7	Lung:NSCLC_Adeno	LUAD	3.3006		0.130735	1.72273		-2.93528	-4.32265	0.164171		0.187791	-0.574728	-0.205278	WT	WT	WT	chr6_33289506-33289507_->G	damaging	p.L66fs	chr17_7578403-7578403_C>T	other non-conserving	p.C176Y	WT	WT	WT	WT	WT	WT	chr7_140494123-140494123_T>A	other non-conserving	p.E375D	WT
ACH-001552	MCC26_SKIN			SIDM00006	skin	nan	nan	nan	nan	nan	nan	nan	nan	nan	nan	nan	nan	nan													WT	WT	WT	WT	WT	WT	chr17_7579311-7579311_C>T,chr17_7579312-7579312_C>T	damaging,damaging	nan,p.T125T	WT	WT	WT	WT	WT	WT	WT	WT	WT	WT
ACH-002343	BB49EBV_MATCHED_NORMAL_TISSUE	BB49EBV_Matched_Normal_Tissue		nan	non_cancerous																0.100945			-3.30836	-3.30836			-0.133191	0.510494	0.510494	WT	WT	WT	WT	WT	WT	WT	WT	WT	WT	WT	WT	WT	WT	WT	WT	WT	WT	WT
ACH-000592	TM31_CENTRAL_NERVOUS_SYSTEM			nan	central_nervous_system	nan	nan	173.450738	glioma	Asian	RIKEN	fibroblast-like	MEM +10%FBS	nan	nan	nan	CNS:Glioma	nan		0.0403079			-4.63279				1.21653				chrX_76778738-76778738_C>A	damaging	p.E2281*	WT	WT	WT	chr17_7577569-7577569_A>C	other non-conserving	p.C238G	WT	WT	WT	WT	WT	WT	WT	WT	WT	WT
ACH-002368	NCIBL2087_MATCHED_NORMAL_TISSUE	NCIBL2087_Matched_Normal_Tissue		SIDM00707	non_cancerous																0.043059			-4.53754	-4.53754			-1.19074	-0.804649	-0.804649	WT	WT	WT	WT	WT	WT	WT	WT	WT	WT	WT	WT	WT	WT	WT	WT	WT	WT	WT
ACH-001042	COLO704_OVARY			nan	ovary	46.0	female	nan	carcinoma	Caucasian	DSMZ	Grow as clusters and single cells in suspension; dt=30-40hrs	RPMI-1640+10%FBS	10% DMSO	30-40 hrs	88.3	nan	OV													WT	WT	WT	WT	WT	WT	WT	WT	WT	WT	WT	WT	WT	WT	WT	WT	WT	WT	WT
ACH-002314	TUR_HAEMATOPOIETIC_AND_LYMPHOID_TISSUE	TUR_HAEMATOPOIETIC_AND_LYMPHOID_TISSUE	909773	SIDM01205	leukemia	nan	nan	nan	nan	nan	nan	nan	nan	nan	nan	nan	nan	DLBC			0.169542			-2.56029	-2.56029			0.510425	1.31088	1.31088	WT	WT	WT	WT	WT	WT	chr17_7578370-7578370_C>T	damaging	nan	WT	WT	WT	WT	WT	WT	WT	WT	WT	WT
ACH-002345	CAR1_LARGE_INTESTINE	CAR1_LARGE_INTESTINE		SIDM00488	colorectal	nan	nan	nan	nan	nan	nan	nan	nan	nan	nan	nan	nan	COAD/READ			0.0544687			-4.19843	-4.19843			-0.898977	-0.441821	-0.441821	WT	WT	WT	WT	WT	WT	chr17_7577124-7577124_C>T	other non-conserving	p.V272M	WT	WT	WT	WT	WT	WT	WT	WT	WT	WT
ACH-001132	MTA_HAEMATOPOIETIC_AND_LYMPHOID_TISSUE			nan	lymphocyte																										WT	WT	WT	WT	WT	WT	chr17_7578206-7578206_T>C	other non-conserving	p.S215G	WT	WT	WT	WT	WT	WT	WT	WT	WT	WT
ACH-000114	SU8686_PANCREAS	SU8686_PANCREAS	1240218	SIDM01188	pancreas	57.0	female	82.22981768	carcinoma	Caucasian	NIBRI	nan	RPMI-1640+10% FBS	5% DMSO	nan	62.1	Pancreas:Carcinoma	PAAD			0.213517			-2.22758	-3.61494			0.796676	0.182469	0.182469	WT	WT	WT	WT	WT	WT	chr17_7573948-7573948_C>A,chr17_7577548-7577548_C>T	other non-conserving,other non-conserving	p.G360V,nan	WT	WT	WT	WT	WT	WT	WT	WT	WT	WT
ACH-000603	BEN_LUNG	BEN_LUNG	753534	SIDM00990	lung	71.0	male	138.03931830000002	carcinoma	Caucasian	DSMZ	Adherent, epitheloid cells growing in monolayers	90% Dulbecco'sMEM(4.5g/l glucose) +10% h.i.FBS	10%DMSO	~ 40-50 hrs	58.8	Lung:Others	UNABLE TO CLASSIFY			0.173654			-2.52571	-3.91308			0.540171	-0.136516	-0.136516	chrX_76939673-76939674_->T	damaging	p.L359fs	WT	WT	WT	chr17_7578442-7578442_T>C	other non-conserving	p.Y163C	WT	WT	WT	WT	WT	WT	WT	WT	WT	WT
ACH-002117	EW24_BONE	EW24_BONE	949168	SIDM00195	bone	nan	nan	nan	nan	nan	nan	nan	nan	nan	nan	nan	nan	nan			0.230341			-2.11816	-3.50552			0.890818	0.299541	0.299541	WT	WT	WT	WT	WT	WT	chr17_7578440-7578440_T>C	other non-conserving	p.K164E	WT	WT	WT	WT	WT	WT	WT	WT	WT	WT
ACH-000627	LCLC103H_LUNG	LCLC103H_LUNG	753586	SIDM00345	lung	61.0	male	133.4069632	carcinoma	Caucasian	DSMZ	pleomorphic, gigantic, adherent cells growing as monolayer	90% RPMI 1640 +10% h. i. FBS	nan	~ 40 hrs	nan	Lung:NSCLC_Large_Cell	nan			0.448304			-1.15745	-2.54482			1.71738	1.32743	1.32743	WT	WT	WT	WT	WT	WT	chr17_7578203-7578203_C>A	other non-conserving	p.V216L	WT	WT	WT	WT	WT	WT	WT	WT	WT	WT
ACH-000808	HUH28_BILIARY_TRACT			nan	bile_duct	nan	nan	nan	carcinoma	Asian	HSSRB	adherent	RPMI-1640+10% FBS	5% DMSO	1 week	90.5	Biliary_Tract:Carcinoma	nan		0.023475			-5.41273				-0.389035				WT	WT	WT	WT	WT	WT	chr17_7577127-7577127_C>T	other non-conserving	p.E271K	WT	WT	WT	WT	WT	WT	WT	WT	WT	WT
ACH-001743	RC2_SOFT_TISSUE			nan	soft_tissue
ACH-002376	LS1034_MATCHED_NORMAL_TISSUE	LS1034_Matched_Normal_Tissue		nan	non_cancerous																0.0808604			-3.62842	-3.62842			-0.408564	0.168047	0.168047	WT	WT	WT	WT	WT	WT	WT	WT	WT	WT	WT	WT	WT	WT	WT	WT	WT	WT	chr17_8131840-8131840_C>T
ACH-000772	TE441T_SOFT_TISSUE	TE441T_SOFT_TISSUE	924248	SIDM01173	soft_tissue	14.0	female	152.06712109999998	rhabdomyosarcoma	African_american	ATCC	Mixed	DMEM+10%FBS	5%DMSO	nan	257.6	Soft_Tissue:Sarcoma_Rhabdoid	SARC			0.0705055			-3.82612	-3.82612			-0.578656	-0.0434763	-0.0434763	chrX_76954091-76954091_A>C	other non-conserving	p.S54A	WT	WT	WT	WT	WT	WT	WT	WT	WT	WT	WT	WT	WT	WT	WT	chr17_8136273-8136273_G>A
ACH-000714	KMS11_HAEMATOPOIETIC_AND_LYMPHOID_TISSUE	KMS11_HAEMATOPOIETIC_AND_LYMPHOID_TISSUE	1659817	SIDM00608	plasma_cell	67.0	female	191.3080362	lymphoid_neoplasm	Asian	HSRRB	adherent	RPMI 1640+20%FBS	5% DMSO	nan	82.2	Lymphoma:Multiple_Myeloma	MM	2.68133	0.0309906	0.0795398	1.42295	-5.01203	-3.65218	-3.65218	-0.147564	0.43585	-0.429003	0.142629	-0.00246775	WT	WT	WT	WT	WT	WT	WT	WT	WT	WT	WT	WT	WT	WT	WT	WT	WT	WT	WT
ACH-000903	FTC133_THYROID	FTC133_THYROID	906864	SIDM00213	thyroid	42.0	male	371.3529985	carcinoma	Caucasian	ECACC	ADHERENT	DMEM:F12+10% FBS	5%DMSO	nan	52.0	Thyroid:Carcinoma	THCA			0.0273098			-5.19444	-5.19444			-1.75591	-1.50748	-1.50748	WT	WT	WT	WT	WT	WT	chr17_7577120-7577120_C>T	other non-conserving	p.R273H	WT	WT	WT	WT	WT	WT	WT	WT	WT	WT
ACH-001550	MCC13_SKIN			SIDM00007	skin	nan	nan	nan	nan	nan	nan	nan	nan	nan	nan	nan	nan	nan													chrX_76912093-76912093_C>T,chrX_76920180-76920180_C>T,chrX_76937623-76937623_C>T	other non-conserving,silent,other non-conserving	p.E1391K,p.G1299G,p.G1042E	chr6_33288214-33288214_G>A	silent	p.L398L	chr17_7577106-7577106_G>A,chr17_7577558-7577558_G>A,chr17_7577559-7577559_G>A	other non-conserving,silent,other non-conserving	p.P278S,p.S241S,p.S241F	WT	WT	WT	WT	WT	WT	WT	WT	WT	WT
ACH-001835	ICC106_BILIARY_TRACT			nan	bile_duct																										WT	WT	WT	WT	WT	WT	chr17_7579585-7579585_G>-	damaging	p.P34fs	WT	WT	WT	WT	WT	WT	WT	WT	WT	WT
ACH-000467	HCC56_LARGE_INTESTINE	HCC56_LARGE_INTESTINE	1290907	SIDM00597	colorectal	nan	nan	139.4057997	carcinoma	Asian	NIBRI	nan	nan	nan	nan	nan	Colorectal:Carcinoma	COAD/READ			0.49531			-1.0136	-2.40096			1.84114	1.48135	1.48135	chrX_76764021-76764021_T>C	silent	p.Q2429Q	WT	WT	WT	chr17_7578262-7578262_C>G	other non-conserving	p.R196P	WT	WT	WT	WT	WT	WT	WT	WT	WT	WT
ACH-001032	CHLA32_BONE			nan	bone																										WT	WT	WT	WT	WT	WT	chr17_7574003-7574003_G>A	damaging	p.R342*	WT	WT	WT	WT	WT	WT	WT	WT	WT	WT
ACH-000576	KMS27_HAEMATOPOIETIC_AND_LYMPHOID_TISSUE			nan	plasma_cell	52.0	male	169.0552943	lymphoid_neoplasm	Asian	nan	suspension	RPMI1640+10%FBS	5%DMSO	nan	73.2	Lymphoma:Multiple_Myeloma	MM		0.0261468			-5.25722				-0.0689008				WT	WT	WT	WT	WT	WT	chr17_7577157-7577157_T>A,chr17_7579311-7579311_C>A	damaging,damaging	nan,nan	WT	WT	WT	WT	WT	WT	WT	WT	WT	WT
ACH-000827	WM793_SKIN	WM793B_SKIN	1299081	SIDM00973	skin	nan	nan	205.7239289	malignant_melanoma	Caucasian	WISTAR	Adherent	RPMI-1640 + 10% FBS	5%DMSO	nan	37.7	Skin:Melanoma	SKCM		0.0192012	0.109477		-5.70266	-3.1913	-3.1913		-0.98587	-0.0324782	0.635738	0.635738	WT	WT	WT	WT	WT	WT	WT	WT	WT	WT	WT	WT	WT	WT	WT	chr7_140453136-140453136_A>T	other non-conserving	p.V600E	WT
ACH-000460	SNU8_OVARY			nan	ovary	55.0	female	143.45971819999997	carcinoma	Asian	KCLB	ADHERENT, EPITHELIAL MONOLAYER	RPMI-1640+10% FBS	5%DMSO	44	143.9	Ovary:Carcinoma	OV													WT	WT	WT	WT	WT	WT	chr17_7578504-7578505_AG>-	damaging	p.P142fs	WT	WT	WT	WT	WT	WT	WT	WT	WT	WT
ACH-000503	BICR16_UPPER_AERODIGESTIVE_TRACT			nan	upper_aerodigestive	nan	male	124.74219950000001	carcinoma	Caucasian	ECACC	ADHERENT	DMEM+10% FBS	5%DMSO	nan	85.6	Upper_Aerodigestive_Tract:Carcinoma	HNSC		0.0281621			-5.1501				0.151613				WT	WT	WT	WT	WT	WT	chr17_7578492-7578492_C>T	damaging	p.W146*	WT	WT	WT	WT	WT	WT	WT	WT	WT	WT
ACH-000962	OC314_OVARY	OC314_OVARY	909257	SIDM00220	ovary	39.0	female	532.8167513000001	carcinoma	Caucasian	ICLC	Epithelial-like grown in monolayer	RPMI+10%FBS	5	nan	41.8	Ovary:Carcinoma	OV			0.0425747			-4.55386	-4.55386			-1.20478	-0.822108	-0.822108	chrX_76845345-76845345_C>A,chrX_76938229-76938230_->T	other non-conserving,damaging	p.R2059M,p.R840fs	WT	WT	WT	chr17_7577120-7577120_C>T	other non-conserving	p.R273H	WT	WT	WT	WT	WT	WT	chr7_140434458-140434458_G>A,chr7_140482927-140482927_G>-,chr7_140500227-140500227_C>T	other non-conserving,damaging,silent	p.A747V,p.P403fs,p.A305A	WT
ACH-002154	LB647SCLC_LUNG	LB647SCLC_LUNG	753582	SIDM00183	lung	nan	nan	nan	nan	nan	nan	nan	nan	nan	nan	nan	nan	SCLC			0.194401			-2.36289	-3.75026			0.680256	0.0376906	0.0376906	WT	WT	WT	WT	WT	WT	chr17_7577058-7577058_C>-	damaging	p.E294fs	WT	WT	WT	WT	WT	WT	WT	WT	WT	WT
ACH-002399	21NT_BREAST			nan	breast																										WT	WT	WT	WT	WT	WT	chr17_7579589-7579590_->A	damaging	p.S33fs	WT	WT	WT	WT	WT	WT	WT	WT	WT	WT
ACH-001190	SKMEL2_SKIN	SKMEL2_SKIN	905955	SIDM00082	skin	60.0	male	nan	malignant_melanoma	Caucasian	nan	polyglonal adherent	nan	5%DMSO	nan	98.8	Skin:Melanoma	SKCM	2.47059		0.165227	1.30486		-2.59748	-3.98484	-0.27037		0.478426	-0.213301	-0.241835	chrX_76845355-76845355_A>T	other non-conserving	p.L2056I	WT	WT	WT	chr17_7577548-7577548_C>T	other non-conserving	nan	WT	WT	WT	WT	WT	WT	WT	WT	WT	WT
ACH-001356	MB1_THYROID			nan	thyroid																										WT	WT	WT	WT	WT	WT	chr17_7578176-7578176_C>T	damaging	nan	WT	WT	WT	WT	WT	WT	WT	WT	WT	WT
ACH-000999	SNU1040_LARGE_INTESTINE	SNU1040_LARGE_INTESTINE	1659823	SIDM00217	colorectal	34.0	male	3119.618365	carcinoma	Asian	KCLB	epithelial; monolayer	RPMI 1640 with L-glutamine (300mg/L), 90%; heat inactivated fetal bovine serum (FBS),10%	nan	63 hrs	nan	Colorectal:Carcinoma	COAD/READ			0.0580933			-4.10548	-4.10548			-0.819011	-0.342377	-0.342377	WT	WT	WT	chr6_33288600-33288600_G>A,chr6_33289609-33289609_C>T	damaging,other non-conserving	p.R318*,p.A32T	chr17_7577539-7577539_G>A,chr17_7579470-7579471_->G,chr17_7579477-7579477_A>G,chr17_7579545-7579545_C>T	other non-conserving,damaging,silent,other non-conserving	p.R248W,p.V73fs,p.A70A,p.D48N	chr3_10183587-10183587_G>A	other non-conserving	p.G19D	WT	WT	WT	chr7_140534555-140534555_C>T,chr7_140549925-140549925_A>G	other non-conserving,other non-conserving	p.V120I,p.S76P	chr17_8137908-8137908_A>G,chr17_8138466-8138466_G>A,chr17_8139594-8139594_G>A
ACH-000626	U266B1_HAEMATOPOIETIC_AND_LYMPHOID_TISSUE	U266B1_HAEMATOPOIETIC_AND_LYMPHOID_TISSUE	753615	SIDM00417	plasma_cell	53.0	male	125.3581906	lymphoid_neoplasm	Caucasian	ATCC	Suspension Lymphoblast	RPMI1640+15%FBS	5%DMSO	nan	198.1	Lymphoma:Multiple_Myeloma	MM			0.0734256			-3.76757	-3.76757			-0.528284	0.0191654	0.0191654	WT	WT	WT	WT	WT	WT	chr17_7578449-7578449_C>T	other non-conserving	p.A161T	WT	WT	WT	chr2_209101835-209101835_A>G	silent	p.L405L	chr7_140453132-140453132_T>A	other non-conserving	p.K601N	WT
ACH-000276	HCC38_BREAST	HCC38_BREAST	749717	SIDM00675	breast	50.0	female	96.75975762	carcinoma	Caucasian	ATCC	adherent, single cells and loosely attached clusters	RPMI-1640 + 10% FBS	5%DMSO	nan	103.3	Breast:Carcinoma	BRCA	1.82937		0.169225	0.871351		-2.56299	-3.95035	-0.721171		0.508103	-0.176395	-0.448783	WT	WT	WT	WT	WT	WT	chr17_7577120-7577120_C>A	other non-conserving	p.R273L	WT	WT	WT	WT	WT	WT	WT	WT	WT	WT
ACH-000973	639V_URINARY_TRACT	639V_URINARY_TRACT	906798	SIDM00999	urinary_tract	69.0	male	683.9508067	carcinoma	Caucasian	ATCC	Adherent epithelial monolayer	DMEM + 10% FBS	10%DMSO	nan	35.8	Bladder:Carcinoma	BLCA			0.118094			-3.08199	-3.08199			0.0615665	0.75269	0.75269	WT	WT	WT	WT	WT	WT	chr17_7577538-7577538_C>T	other non-conserving	nan	WT	WT	WT	WT	WT	WT	WT	WT	WT	WT
ACH-001839	ICC137_BILIARY_TRACT			nan	bile_duct																										WT	WT	WT	WT	WT	WT	WT	WT	WT	WT	WT	WT	WT	WT	WT	WT	WT	WT	WT
ACH-002162	MMACSF_SKIN	MMACSF_SKIN	925339	SIDM01242	skin	nan	nan	nan	nan	nan	nan	nan	nan	nan	nan	nan	nan	SKCM			0.369669			-1.43569	-2.82306			1.47799	1.02973	1.02973	WT	WT	WT	WT	WT	WT	WT	WT	WT	WT	WT	WT	WT	WT	WT	chr7_140453136-140453136_A>T	other non-conserving	p.V600E	WT
ACH-001390	SUM149PT_BREAST			nan	breast																										WT	WT	WT	WT	WT	WT	chr17_7577570-7577570_C>T	other non-conserving	p.M237I	WT	WT	WT	WT	WT	WT	WT	WT	WT	chr17_8136270-8136270_C>A
ACH-001632	PEO4_OVARY			SIDM00471	ovary																										WT	WT	WT	WT	WT	WT	chr17_7577550-7577550_C>T	other non-conserving	p.G244D	WT	WT	WT	WT	WT	WT	WT	WT	WT	WT
ACH-001711	PFSK1_CENTRAL_NERVOUS_SYSTEM	PFSK1_CENTRAL_NERVOUS_SYSTEM	683667	SIDM01132	central_nervous_system	nan	nan	nan	nan	nan	nan	nan	nan	nan	nan	nan	nan	MB			0.131934			-2.92211	-4.30948			0.199122	-0.560636	-0.560636	WT	WT	WT	WT	WT	WT	chr17_7577115-7577115_A>C	other non-conserving	p.C275G	WT	WT	WT	WT	WT	WT	WT	WT	WT	WT
ACH-000440	CA46_HAEMATOPOIETIC_AND_LYMPHOID_TISSUE	CA46_HAEMATOPOIETIC_AND_LYMPHOID_TISSUE	910703	SIDM00907	lymphocyte	nan	male	135.0411689	lymphoid_neoplasm	Asian	ATCC	Adherent	RPMI + 10 % FBS	5%DMSO	nan	25.7	Lymphoma:NH_B_cell	DLBC			0.086682			-3.52812	-3.52812			-0.32227	0.27536	0.27536	WT	WT	WT	WT	WT	WT	chr17_7577538-7577538_C>T	other non-conserving	nan	WT	WT	WT	WT	WT	WT	WT	WT	WT	WT
ACH-001136	NCIH187_LUNG	NCIH187_LUNG	688007	SIDM00767	lung	nan	nan	nan	nan	nan	nan	nan	nan	nan	nan	nan	nan	SCLC			0.030136			-5.05237	-5.05237			-1.63368	-1.35548	-1.35548	chrX_76938212-76938212_C>G	other non-conserving	p.D846H	WT	WT	WT	chr17_7577559-7577559_G>C	other non-conserving	p.S241C	WT	WT	WT	WT	WT	WT	WT	WT	WT	WT
ACH-000697	A3KAW_HAEMATOPOIETIC_AND_LYMPHOID_TISSUE	A3KAW_HAEMATOPOIETIC_AND_LYMPHOID_TISSUE	910935	SIDM00495	lymphocyte	nan	female	211.4255162	lymphoid_neoplasm	Asian	HSRRB	suspension; grows in aggregates	nan	5% DMSO	nan	40.0	Lymphoma:NH_B_cell	DLBC	17.1664		0.370819	4.10151		-1.43121	-1.43121	2.63786		1.48184	2.51891	2.57838	WT	WT	WT	WT	WT	WT	WT	WT	WT	WT	WT	WT	WT	WT	WT	WT	WT	WT	WT
ACH-002026	HHUA_ENDOMETRIUM			nan	uterus																										WT	WT	WT	WT	WT	WT	WT	WT	WT	chr3_10183774-10183774_G>A	silent	p.P81P	WT	WT	WT	chr7_140534444-140534444_C>T	other non-conserving	p.V157I	WT
ACH-000958	SW48_LARGE_INTESTINE	SW48_LARGE_INTESTINE	909751	SIDM00837	colorectal	82.0	female	563.7096269	carcinoma	Caucasian	NIBRI	nan	nan	nan	nan	nan	Colorectal:Carcinoma	COAD/READ	4.53277		0.204942	2.18039		-2.28671	-3.67408	0.640096		0.745798	0.119198	0.379647	chrX_76938089-76938090_TC>-	damaging	p.ET886fs	chr6_33289057-33289057_G>T	silent	p.S165S	WT	WT	WT	WT	WT	WT	WT	WT	WT	WT	WT	WT	WT
ACH-000104	LOUCY_HAEMATOPOIETIC_AND_LYMPHOID_TISSUE	LOUCY_HAEMATOPOIETIC_AND_LYMPHOID_TISSUE	907789	SIDM00342	blood	38.0	female	95.83691800000001	lymphoid_neoplasm	Caucasian	NIBRI	nan	nan	nan	nan	nan	Leukemia:ALL	ALL			0.0971533			-3.36359	-3.36359			-0.180713	0.451397	0.451397	WT	WT	WT	WT	WT	WT	chr17_7577124-7577124_C>T	other non-conserving	p.V272M	WT	WT	WT	WT	WT	WT	WT	WT	WT	WT
ACH-002157	LC2AD_LUNG	LC2AD_LUNG	907786	SIDM00297	lung	nan	nan	nan	nan	nan	nan	nan	nan	nan	nan	nan	nan	LUAD			0.10098			-3.30786	-4.69522			-0.132761	-0.973359	-0.973359	WT	WT	WT	WT	WT	WT	chr17_7577559-7577559_G>C	other non-conserving	p.S241C	WT	WT	WT	WT	WT	WT	WT	WT	WT	WT
ACH-000290	NCIH209_LUNG	NCIH209_LUNG	688013	SIDM00706	lung	55.0	male	98.23803075	carcinoma	Caucasian	nan	Suspension	RPMI-1640+10%FBS	5%DMSO	nan	115.6	Lung:SCLC	SCLC	1.63934		0.12011	0.713114		-3.05757	-4.44494	-0.88572		0.0825772	-0.705569	-0.795645	WT	WT	WT	WT	WT	WT	chr17_7577610-7577610_T>A	damaging	nan	WT	WT	WT	WT	WT	WT	WT	WT	WT	WT
ACH-002291	NTERA2CLD1_TESTIS	NTERA2CLD1_TESTIS	908454	SIDM01203	embryo	nan	nan	nan	nan	nan	nan	nan	nan	nan	nan	nan	nan	nan			0.288793			-1.79189	-3.17926			1.17152	0.648622	0.648622	WT	WT	WT	WT	WT	WT	WT	WT	WT	WT	WT	WT	WT	WT	WT	WT	WT	WT	WT
ACH-002283	NB5_AUTONOMIC_GANGLIA	NB5_AUTONOMIC_GANGLIA	949176	SIDM00254	peripheral_nervous_system	nan	nan	nan	nan	nan	nan	nan	nan	nan	nan	nan	nan	NB			0.074648			-3.74375	-3.74375			-0.507789	0.0446517	0.0446517	WT	WT	WT	WT	WT	WT	WT	WT	WT	WT	WT	WT	WT	WT	WT	WT	WT	WT	WT
ACH-002464	RPE1SS6_ENGINEERED			nan	engineered																										WT	WT	WT	WT	WT	WT	WT	WT	WT	WT	WT	WT	WT	WT	WT	WT	WT	WT	WT
ACH-000202	COLO320_LARGE_INTESTINE	COLO320_LARGE_INTESTINE		SIDM00071	colorectal	55.0	female	86.85764298	carcinoma	Caucasian	DSMZ	undifferentiated, round cells in suspension and loosely adherent in monolayers	90% RPMI 1640 + 10% h.i. FBS	nan	~ 38 hrs	nan	Colorectal:Carcinoma	COAD/READ			0.310972			-1.68514	-3.07251			1.26337	0.762836	0.762836	WT	WT	WT	WT	WT	WT	chr17_7577539-7577539_G>A	other non-conserving	p.R248W	WT	WT	WT	WT	WT	WT	WT	WT	WT	chr17_8135265-8135265_A>C
ACH-001673	TFK1_BILIARY_TRACT			nan	bile_duct																										WT	WT	WT	WT	WT	WT	chr17_7579414-7579414_C>T	damaging	p.W91*	WT	WT	WT	WT	WT	WT	WT	WT	WT	WT
ACH-000389	H4_CENTRAL_NERVOUS_SYSTEM	H4_CENTRAL_NERVOUS_SYSTEM	907042	SIDM00852	central_nervous_system	37.0	male	108.47913	glioma	Caucasian	NIBRI	nan	nan	nan	nan	35.6	CNS:Glioma	LGG	2.65738		0.120528	1.41001		-3.05256	-4.43993	-0.161026		0.0868894	-0.700207	-0.430616	WT	WT	WT	WT	WT	WT	WT	WT	WT	WT	WT	WT	WT	WT	WT	WT	WT	WT	WT
ACH-001495	EMTOKA_ENDOMETRIUM			nan	uterus																										WT	WT	WT	WT	WT	WT	chr17_7578534-7578534_C>A	other non-conserving	p.K132N	WT	WT	WT	WT	WT	WT	WT	WT	WT	WT
ACH-000539	HS618T_FIBROBLAST			nan	fibroblast	60.0	female	108.9966548	carcinoma	Caucasian	ATCC	Adherent	DMEM +10 %FBS	5%DMSO	nan	30.0	Lung:NSCLC_Adeno	LUAD													chrX_76919029-76919029_T>C	other non-conserving	p.N1321S	WT	WT	WT	WT	WT	WT	WT	WT	WT	WT	WT	WT	WT	WT	WT	WT
ACH-002390	MC1010_HAEMATOPOIETIC_AND_LYMPHOID_TISSUE			SIDM00009	blood	nan	nan	nan	nan	nan	nan	nan	nan	nan	nan	nan	nan	LAML													WT	WT	WT	WT	WT	WT	WT	WT	WT	WT	WT	WT	WT	WT	WT	WT	WT	WT	WT
ACH-002339	MOT_HAEMATOPOIETIC_AND_LYMPHOID_TISSUE	MOT_HAEMATOPOIETIC_AND_LYMPHOID_TISSUE		SIDM00623	leukemia	nan	nan	nan	nan	nan	nan	nan	nan	nan	nan	nan	nan	nan			0.123068			-3.02247	-3.02247			0.112776	0.816373	0.816373	WT	WT	WT	WT	WT	WT	WT	WT	WT	WT	WT	WT	WT	WT	WT	WT	WT	WT	WT
ACH-001007	A673STAG2KO16_ENGINEERED			nan	engineered_bone
ACH-001641	SAT_UPPER_AERODIGESTIVE_TRACT	SAT_UPPER_AERODIGESTIVE_TRACT	1299050	SIDM00350	upper_aerodigestive	nan	nan	nan	nan	nan	nan	nan	nan	nan	nan	nan	nan	HNSC			0.036301			-4.78385	-4.78385			-1.40265	-1.06818	-1.06818	WT	WT	WT	WT	WT	WT	chr17_7577127-7577127_C>A,chr17_7579358-7579358_C>A	damaging,other non-conserving	p.E271*,p.R110L	WT	WT	WT	WT	WT	WT	WT	WT	WT	WT
ACH-002134	NCIH2818_PLEURA	NCIH2818_PLEURA	1290814	SIDM00520	lung	nan	nan	nan	nan	nan	nan	nan	nan	nan	nan	nan	nan	MESO			0.0748025			-3.74077	-5.12814			-0.505223	-1.43655	-1.43655	WT	WT	WT	WT	WT	WT	chr17_7578269-7578274_GATGCT>-	other non-conserving	p.QH192del	WT	WT	WT	WT	WT	WT	WT	WT	WT	WT
ACH-002300	RAMOS2G64C10_HAEMATOPOIETIC_AND_LYMPHOID_TISSUE	RAMOS2G64C10_HAEMATOPOIETIC_AND_LYMPHOID_TISSUE	910401	SIDM01247	lymphoma	nan	nan	nan	nan	nan	nan	nan	nan	nan	nan	nan	nan	nan			0.302487			-1.72505	-1.72505			1.22903	2.20452	2.20452	WT	WT	WT	WT	WT	WT	chr17_7577520-7577520_A>T,chr17_7577521-7577521_T>C	other non-conserving,other non-conserving	p.I254N,p.I254V	WT	WT	WT	WT	WT	WT	WT	WT	WT	WT
ACH-000423	SKMEL3_SKIN	SKMEL3_SKIN	909724	SIDM01105	skin	42.0	female	108.44912009999999	malignant_melanoma	Caucasian	nan	Fibroblast like adherent	McCoy 5A+15%FBS	5%DMSO	nan	387.0	Skin:Melanoma	SKCM			0.242056			-2.04659	-3.43395			0.952394	0.376116	0.376116	WT	WT	WT	WT	WT	WT	chr17_7577139-7577139_G>A	other non-conserving	p.R267W	WT	WT	WT	WT	WT	WT	chr7_140453136-140453136_A>T	other non-conserving	p.V600E	WT
ACH-000254	SCC15_UPPER_AERODIGESTIVE_TRACT	SCC15_UPPER_AERODIGESTIVE_TRACT	910911	SIDM01083	upper_aerodigestive	55.0	male	98.65716635	carcinoma	Caucasian	NIBRI	nan	nan	nan	nan	nan	Upper_Aerodigestive_Tract:Carcinoma	HNSC			0.0260548			-5.26231	-5.26231			-1.8143	-1.5801	-1.5801	WT	WT	WT	WT	WT	WT	chr17_7578176-7578176_C>T	damaging	nan	WT	WT	WT	WT	WT	WT	WT	WT	WT	WT
ACH-001549	LU135_LUNG	LU135_LUNG	713899	SIDM00294	lung	nan	nan	nan	nan	nan	nan	nan	nan	nan	nan	nan	nan	SCLC			0.136253			-2.87564	-4.26301			0.239105	-0.510915	-0.510915	WT	WT	WT	WT	WT	WT	chr17_7577551-7577551_C>A	other non-conserving	p.G244C	WT	WT	WT	WT	WT	WT	WT	WT	WT	WT
ACH-002136	H290_PLEURA	H290_PLEURA	1240139	SIDM00518	lung	nan	nan	nan	nan	nan	nan	nan	nan	nan	nan	nan	nan	MESO			0.0770404			-3.69824	-5.08561			-0.468633	-1.39104	-1.39104	WT	WT	WT	WT	WT	WT	WT	WT	WT	WT	WT	WT	WT	WT	WT	WT	WT	WT	WT
ACH-001049	CPCN_LUNG	CPCN_LUNG	753547	SIDM00953	lung	nan	nan	nan	carcinoma	Caucasian	ATCC	Suspension	McCoy's 5A +10%FBS	10% DMSO	nan	nan	nan	SCLC			0.18964			-2.39866	-3.78603			0.649478	-0.000583377	-0.000583377	WT	WT	WT	WT	WT	WT	chr17_7577547-7577547_C>A	other non-conserving	p.G245V	WT	WT	WT	WT	WT	WT	WT	WT	WT	WT
ACH-000577	JHH2_LIVER	JHH2_LIVER	1240157	SIDM00617	liver	57.0	male	200.1671139	carcinoma	Asian	HSRRB	Adherent	EMEM +10 % FBS	5%DMSO	nan	99.1	Liver:HCC	LIHC			0.122584			-3.02816	-4.41552			0.107884	-0.674098	-0.674098	WT	WT	WT	WT	WT	WT	chr17_7579310-7579310_A>C	damaging	nan	WT	WT	WT	WT	WT	WT	WT	WT	WT	WT
ACH-002175	NCIH740_LUNG	NCIH740_LUNG	1331055	SIDM01118	lung	nan	nan	nan	nan	nan	nan	nan	nan	nan	nan	nan	nan	SCLC			0.0628912			-3.991	-3.991			-0.720511	-0.219884	-0.219884	WT	WT	WT	WT	WT	WT	chr17_7577138-7577138_C>G	other non-conserving	p.R267P	WT	WT	WT	WT	WT	WT	WT	WT	WT	WT
ACH-000483	SNU182_LIVER	SNU182_LIVER	1240216	SIDM01151	liver	24.0	male	140.778944	carcinoma	Asian	NIBRI	nan	nan	nan	nan	nan	Liver:HCC	LIHC	3.10339		0.123508	1.63385		-3.01732	-4.40469	0.0717445		0.117205	-0.662507	-0.295381	WT	WT	WT	WT	WT	WT	chr17_7578205-7578205_C>A	other non-conserving	p.S215I	WT	WT	WT	WT	WT	WT	WT	WT	WT	WT
ACH-000613	HOS_BONE	HOS_BONE	907060	SIDM00806	bone	13.0	female	127.97967129999999	osteosarcoma	Caucasian	GNF	nan	nan	nan	nan	nan	Bone:Sarcoma_Osteo	SARC			0.139592			-2.84071	-4.22808			0.269156	-0.473544	-0.473544	WT	WT	WT	WT	WT	WT	chr17_7578463-7578463_C>G	other non-conserving	p.R156P	WT	WT	WT	chr2_209106791-209106791_C>T	other non-conserving	p.M259I	WT	WT	WT	WT
ACH-000741	UBLC1_URINARY_TRACT			nan	urinary_tract	nan	female	142.3789895	carcinoma	African_american	ECACC	Adherent	2/3 DMEM:1/3 RPMI+10%FBS	5% DMSO	nan	221.1	Bladder:Carcinoma	BLCA		0.0276017			-5.1791				0.0919197				WT	WT	WT	WT	WT	WT	chr17_7576855-7576855_G>A,chr17_7577052-7577052_G>A	damaging,other non-conserving	p.Q331*,p.H296Y	WT	WT	WT	WT	WT	WT	WT	WT	WT	WT
ACH-002460	HT144_SKIN_FV2_RESISTANT			nan	skin																										WT	WT	WT	WT	WT	WT	WT	WT	WT	WT	WT	WT	WT	WT	WT	chr7_140453136-140453136_A>T	other non-conserving	p.V600E	WT
ACH-000024	OPM2_HAEMATOPOIETIC_AND_LYMPHOID_TISSUE	OPM2_HAEMATOPOIETIC_AND_LYMPHOID_TISSUE	909249	SIDM00457	plasma_cell	56.0	female	149.10268	lymphoid_neoplasm	Asian	DSMZ	suspension	RPMI + 10 % FBS	5%DMSO	nan	93.0	Lymphoma:Multiple_Myeloma	MM	2.64416		0.109039	1.40281		-3.19708	-4.58445	-0.168511		-0.0374542	-0.854838	-0.511675	WT	WT	WT	WT	WT	WT	chr17_7578406-7578406_C>T	other non-conserving	p.R175H	WT	WT	WT	WT	WT	WT	WT	WT	WT	WT
ACH-000081	GDM1_HAEMATOPOIETIC_AND_LYMPHOID_TISSUE	GDM1_HAEMATOPOIETIC_AND_LYMPHOID_TISSUE	906870	SIDM01057	blood	66.0	female	83.72081463	haematopoietic_neoplasm	Caucasian	NIBRI	nan	nan	nan	nan	nan	Leukemia:AML	LAML		0.0337345	0.0719316		-4.88963	-3.79723	-3.79723		0.687813	-0.5538	-0.0125661	-0.0125661	WT	WT	WT	WT	WT	WT	WT	WT	WT	WT	WT	WT	WT	WT	WT	WT	WT	WT	chr17_8139600-8139600_C>A
ACH-000876	MDAMB415_BREAST	MDAMB415_BREAST	924240	SIDM00630	breast	38.0	female	229.07328059999998	carcinoma	Caucasian	ATCC	adherent epithelial	RPMI-1640 + 15% FBS	5%DMSO	nan	184.8	Breast:Carcinoma	BRCA		0.0239066	0.0749106		-5.38645	-3.73869	-3.73869		-0.334925	-0.503431	0.0500722	0.0500722	WT	WT	WT	WT	WT	WT	chr17_7577574-7577574_T>C	other non-conserving	p.Y236C	WT	WT	WT	WT	WT	WT	chr7_140549931-140549931_G>C	other non-conserving	p.P74A	chr17_8135284-8135284_C>G
ACH-001071	GLC82_LUNG			nan	lung	58.0	female	nan	carcinoma	African_american	ICLC	Epithelial monolayer	DMEM+10% FBS	5% DMSO	48 hrs	nan	nan	nan
ACH-001335	C4II_CERVIX			SIDM00906	cervix																										WT	WT	WT	WT	WT	WT	WT	WT	WT	WT	WT	WT	WT	WT	WT	WT	WT	WT	WT
ACH-002263	KYSE220_OESOPHAGUS	KYSE220_OESOPHAGUS	1240167	SIDM00551	esophagus	nan	nan	nan	nan	nan	nan	nan	nan	nan	nan	nan	nan	ESCA			0.153612			-2.70264	-4.09			0.387951	-0.325813	-0.325813	WT	WT	WT	WT	WT	WT	chr17_7577539-7577539_G>A	other non-conserving	p.R248W	WT	WT	WT	WT	WT	WT	chr7_140508720-140508720_A>C	other non-conserving	p.C194G	WT
ACH-000459	TUHR10TKB_KIDNEY			nan	kidney	nan	nan	168.6101635	carcinoma	Asian	RIKEN	epithelial-like	RPMI 1640 +10%FBS	nan	nan	nan	Kidney:Carcinoma	KIRC		0.0286404			-5.12581				0.201628				chrX_76938271-76938271_T>C	other non-conserving	p.K826R	WT	WT	WT	WT	WT	WT	chr3_10191564-10191564_A>-	damaging	p.E186fs	WT	WT	WT	WT	WT	WT	WT
ACH-000064	SALE_LUNG			nan	engineered_lung	nan	nan	90.36904673	other	Caucasian	nan	nan	nan	nan	nan	nan	nan	nan													WT	WT	WT	WT	WT	WT	WT	WT	WT	WT	WT	WT	WT	WT	WT	WT	WT	WT	WT
ACH-000806	L540_HAEMATOPOIETIC_AND_LYMPHOID_TISSUE	L540_HAEMATOPOIETIC_AND_LYMPHOID_TISSUE	907323	SIDM00329	lymphocyte	20.0	female	189.62094330000002	lymphoid_neoplasm	Caucasian	DSMZ	round cells growing singly in suspention	80% RPMI 1640 + 20% h. i. FBS	nan	~ 70 hrs	nan	Lymphoma:Hodgkin	nan			0.0784657			-3.67179	-3.67179			-0.445879	0.121642	0.121642	WT	WT	WT	WT	WT	WT	WT	WT	WT	WT	WT	WT	WT	WT	WT	WT	WT	WT	WT
ACH-000270	HPAC_PANCREAS	HPAC_PANCREAS	1298136	SIDM00670	pancreas	64.0	female	98.3442931	carcinoma	Caucasian	ATCC	ADHERENT EPITHELIAL;	DMEM:F12 + 5% FBS	5%DMSO	nan	69.7	Pancreas:Carcinoma	PAAD	4.94014		0.216901	2.30455		-2.20489	-3.59226	0.769208		0.816194	0.206741	0.487975	chrX_76944332-76944332_T>C	silent	p.S191S	WT	WT	WT	chr17_7578371-7578371_C>G	damaging	p.G187R	WT	WT	WT	WT	WT	WT	WT	WT	WT	WT
ACH-000162	GA10_HAEMATOPOIETIC_AND_LYMPHOID_TISSUE	GA10_HAEMATOPOIETIC_AND_LYMPHOID_TISSUE	1303896	SIDM00854	lymphocyte	41.0	male	91.70436082	lymphoid_neoplasm	Caucasian	ATCC	suspension, lymphoblast	RPMI-1640 + 10% FBS	5%DMSO	nan	51.6	Lymphoma:NH_B_cell	DLBC			0.052489			-4.25184	-4.25184			-0.944931	-0.498969	-0.498969	WT	WT	WT	WT	WT	WT	chr17_7577586-7577586_A>T,chr17_7578475-7578475_G>A	other non-conserving,other non-conserving	p.I232N,p.P152L	WT	WT	WT	WT	WT	WT	WT	WT	WT	WT
ACH-001001	143B_BONE			SIDM00804	bone	13.0	female	nan	osteosarcoma	Caucasian	nan	nan	nan	nan	nan	nan	nan	nan													WT	WT	WT	WT	WT	WT	chr17_7578463-7578463_C>G	other non-conserving	p.R156P	WT	WT	WT	WT	WT	WT	WT	WT	WT	WT
ACH-000161	CORL105_LUNG	CORL105_LUNG	906805	SIDM00513	lung	nan	male	86.52454761	carcinoma	Caucasian	GNF	nan	nan	nan	nan	nan	Lung:NSCLC_Adeno	LUAD			0.143967			-2.79619	-4.18356			0.307461	-0.425908	-0.425908	WT	WT	WT	WT	WT	WT	WT	WT	WT	WT	WT	WT	chr2_209113113-209113113_G>A	other non-conserving	p.R132C	WT	WT	WT	WT
ACH-000939	SKUT1_SOFT_TISSUE	SKUT1_SOFT_TISSUE	909732	SIDM01113	soft_tissue	75.0	female	448.08848	leiomyosarcoma	Caucasian	ATCC	adherent epithelial	EMEM + 10% FBS	5%DMSO	nan	41.6	Soft_Tissue:Sarcoma_Leiomyo	SARC	1.75242		0.0513367	0.809346		-4.28387	-4.28387	-0.785649		-0.972484	-0.533233	-0.659441	WT	WT	WT	WT	WT	WT	chr17_7577538-7577538_C>T,chr17_7578406-7578406_C>T	other non-conserving,other non-conserving	nan,p.R175H	WT	WT	WT	WT	WT	WT	WT	WT	WT	chr17_8133941-8133941_C>T
ACH-001093	HS604T_FIBROBLAST			nan	fibroblast	21.0	male	nan	lymphoid_neoplasm	Caucasian	ATCC	Adherent	DMEM +10 %FBS	5%DMSO	nan	nan	nan	nan		0.0351117			-4.8319				0.806649				WT	WT	WT	WT	WT	WT	WT	WT	WT	WT	WT	WT	WT	WT	WT	WT	WT	WT	WT
ACH-001825	SW527_LARGE_INTESTINE			nan	colorectal
ACH-000519	PEER_HAEMATOPOIETIC_AND_LYMPHOID_TISSUE			SIDM00991	blood	4.0	female	129.00023190000002	lymphoid_neoplasm	Caucasian	HSRRB	lymphocyte-like	RPMI 1640 medium with fetal calf serum	nan	nan	nan	Leukemia:ALL	ALL		0.0273515			-5.19224				0.0648729				WT	WT	WT	WT	WT	WT	chr17_7578442-7578442_T>C,chr17_7579312-7579312_C>T	other non-conserving,damaging	p.Y163C,p.T125T	WT	WT	WT	WT	WT	WT	WT	WT	WT	WT
ACH-000736	SNU601_STOMACH			nan	gastric	34.0	male	198.6286534	carcinoma	Asian	KCLB	epithelial; monolayer	RPMI 1640 with L-glutamine (300mg/L), 90%; heat inactivated fetal bovine serum (FBS),10%	nan	nan	nan	Gastric:Carcinoma	STAD		0.0558533			-4.16221				2.18526				WT	WT	WT	WT	WT	WT	chr17_7577120-7577120_C>T	other non-conserving	p.R273H	WT	WT	WT	WT	WT	WT	WT	WT	WT	chr17_8138119-8138119_C>T
ACH-001510	H376_UPPER_AERODIGESTIVE_TRACT			nan	upper_aerodigestive																										WT	WT	WT	WT	WT	WT	chr17_7577142-7577142_C>A	damaging	p.G266*	WT	WT	WT	WT	WT	WT	WT	WT	WT	WT
ACH-000157	A4FUK_HAEMATOPOIETIC_AND_LYMPHOID_TISSUE	A4FUK_HAEMATOPOIETIC_AND_LYMPHOID_TISSUE	910934	SIDM00502	lymphocyte	52.0	female	116.4358582	lymphoid_neoplasm	Asian	JCRB	SUSPENSION	RPMI-10% FBS	5% DMSO	nan	118.1	Lymphoma:NH_B_cell	DLBC			0.493214			-1.01971	-2.40708			1.83588	1.4748	1.4748	WT	WT	WT	WT	WT	WT	chr17_7577536-7577536_T>C	other non-conserving	p.R249G	WT	WT	WT	WT	WT	WT	WT	WT	WT	WT
ACH-001485	CII_HAEMATOPOIETIC_AND_LYMPHOID_TISSUE			nan	blood																										WT	WT	WT	WT	WT	WT	WT	WT	WT	WT	WT	WT	WT	WT	WT	WT	WT	WT	WT
ACH-001799	LPS141_SOFT_TISSUE			nan	soft_tissue																										WT	WT	WT	WT	WT	WT	WT	WT	WT	WT	WT	WT	WT	WT	WT	WT	WT	WT	WT
ACH-000234	CAKI2_KIDNEY			nan	kidney	69.0	male	97.33436222	carcinoma	Caucasian	NIBRI	nan	nan	nan	nan	nan	Kidney:Carcinoma	KIRC		0.0460701			-4.44002				1.61336				WT	WT	WT	WT	WT	WT	WT	WT	WT	chr3_10191536-10191536_A>T	damaging	p.R177*	WT	WT	WT	WT	WT	WT	chr17_8139565-8139565_C>G
ACH-000486	KU1919_URINARY_TRACT	KU1919_URINARY_TRACT	907312	SIDM01033	urinary_tract	76.0	male	164.7429793	carcinoma	Asian	DSMZ	Adherent	RPMI +10%FBS	5%DMSO	nan	35.1	Bladder:Carcinoma	BLCA	13.6474		0.863515	3.77055		-0.211707	-1.59907	2.29369		2.53106	2.33931	2.3165	WT	WT	WT	WT	WT	WT	WT	WT	WT	WT	WT	WT	WT	WT	WT	WT	WT	WT	WT
ACH-002335	UCH1_BONE			nan	bone
ACH-002116	EW22_BONE	EW22_BONE	949167	SIDM00196	bone	nan	nan	nan	nan	nan	nan	nan	nan	nan	nan	nan	nan	nan			0.179123			-2.48098	-3.86834			0.578659	-0.0886524	-0.0886524	WT	WT	WT	WT	WT	WT	chr17_7578406-7578406_C>T	other non-conserving	p.R175H	WT	WT	WT	WT	WT	WT	WT	WT	WT	WT
ACH-001509	H357_UPPER_AERODIGESTIVE_TRACT			nan	upper_aerodigestive																										WT	WT	WT	WT	WT	WT	chr17_7577509-7577509_C>T	other non-conserving	p.E258K	WT	WT	WT	WT	WT	WT	WT	WT	WT	WT
ACH-002085	HSSYII_LUNG			nan	soft_tissue
ACH-001339	COLO794_SKIN			SIDM00514	skin																										WT	WT	WT	WT	WT	WT	chr17_7578527-7578527_A>G	other non-conserving	p.C135R	WT	WT	WT	WT	WT	WT	chr7_140453136-140453136_A>T	other non-conserving	p.V600E	WT
ACH-000921	NCIH1339_LUNG			nan	lung	49.0	female	346.1350217	carcinoma	African_american	ATCC	Adherent	RPMI+20%FBS	5%DMSO	nan	83.3	Lung:SCLC	SCLC	1.59901	0.0197776		0.677182	-5.65999			-0.923085	-0.898028			-0.923085	WT	WT	WT	WT	WT	WT	chr17_7577046-7577046_C>A,chr17_7579582-7579583_->A	damaging,damaging	p.E298*,p.L35fs	WT	WT	WT	WT	WT	WT	WT	WT	WT	WT
ACH-001515	HCS2_CERVIX			nan	cervix																										WT	WT	WT	WT	WT	WT	WT	WT	WT	WT	WT	WT	WT	WT	WT	WT	WT	WT	WT
ACH-002253	JSC1_HAEMATOPOIETIC_AND_LYMPHOID_TISSUE	JSC1_HAEMATOPOIETIC_AND_LYMPHOID_TISSUE	1327769	SIDM00688	lymphoma	nan	nan	nan	nan	nan	nan	nan	nan	nan	nan	nan	nan	DLBC			0.0361836			-4.78852	-4.78852			-1.40667	-1.07318	-1.07318	WT	WT	WT	WT	WT	WT	WT	WT	WT	WT	WT	WT	WT	WT	WT	WT	WT	WT	WT
ACH-000793	KATOIII_STOMACH	KATOIII_STOMACH	907276	SIDM00687	gastric	55.0	male	213.45119810000003	carcinoma	Asian	ATCC	Mixed adherent and suspension (spherical)	IMDM + 20%FBS	5%DMSO	nan	48.7	Gastric:Carcinoma	STAD	2.89389		0.0684643	1.53301		-3.8685	-3.8685	-0.0331125		-0.615122	-0.0888242	-0.0609684	WT	WT	WT	WT	WT	WT	WT	WT	WT	WT	WT	WT	WT	WT	WT	WT	WT	WT	WT
ACH-001566	MM370_SKIN			nan	skin																										chrX_76938082-76938082_G>A	other non-conserving	p.S889F	WT	WT	WT	WT	WT	WT	WT	WT	WT	WT	WT	WT	chr7_140453136-140453136_A>T	other non-conserving	p.V600E	WT
ACH-002259	KNS81FD_CENTRAL_NERVOUS_SYSTEM	KNS81FD_CENTRAL_NERVOUS_SYSTEM	924188	SIDM01210	central_nervous_system	nan	nan	nan	nan	nan	nan	nan	nan	nan	nan	nan	nan	LGG			0.130768			-2.93492	-4.32228			0.188104	-0.574339	-0.574339	WT	WT	WT	WT	WT	WT	WT	WT	WT	WT	WT	WT	WT	WT	WT	WT	WT	WT	WT
ACH-001207	TIG3TD_FIBROBLAST			nan	fibroblast	nan	nan	167.7649252	other	nan	nan	nan	nan	nan	nan	nan	nan	nan													WT	WT	WT	WT	WT	WT	WT	WT	WT	WT	WT	WT	WT	WT	WT	WT	WT	WT	WT
ACH-000139	PANC0327_PANCREAS	PANC0327_PANCREAS	925346	SIDM01138	pancreas	65.0	female	87.6416756	carcinoma	Caucasian	ATCC	ADHERENT EPITHELIAL;	RPMI-1640+15% FBS	5% DMSO	nan	85.9	Pancreas:Carcinoma	PAAD	1.6627		0.0280207	0.733527		-5.15736	-5.15736	-0.864493		-1.72401	-1.46782	-1.16615	WT	WT	WT	chr6_33288240-33288240_C>G	other non-conserving	p.E390Q	WT	WT	WT	WT	WT	WT	WT	WT	WT	WT	WT	WT	WT
ACH-001057	DERL2_HAEMATOPOIETIC_AND_LYMPHOID_TISSUE			nan	lymphocyte																										WT	WT	WT	WT	WT	WT	WT	WT	WT	WT	WT	WT	WT	WT	WT	WT	WT	WT	WT
ACH-000777	KYSE30_OESOPHAGUS			SIDM00015	esophagus	64.0	male	188.09528930000002	carcinoma	Asian	GNF	nan	nan	nan	~ 30 hrs	nan	Oesophagus:Carcinoma	ESCA	2.02425	0.0229003		1.01739	-5.44849			-0.56931	-0.462636			-0.56931	WT	WT	WT	WT	WT	WT	chr17_7576870-7576870_C>T,chr17_7577610-7577610_T>C,chr17_7579358-7579358_C>A	other non-conserving,damaging,other non-conserving	p.E326K,nan,p.R110L	WT	WT	WT	WT	WT	WT	WT	WT	WT	chr17_8146306-8146306_T>G
ACH-000361	SKHEP1_LIVER	SKHEP1_LIVER	909719	SIDM01110	liver	52.0	male	144.8941285	carcinoma	Caucasian	ATCC	adherent epithelial	EMEM + 10% FBS	5%DMSO	nan	44.4	Liver:Carcinoma_Adeno	LIHC	1.99921		0.0731574	0.99943		-3.77285	-3.77285	-0.587981		-0.532826	0.0135168	-0.287232	WT	WT	WT	WT	WT	WT	WT	WT	WT	WT	WT	WT	WT	WT	WT	chr7_140453136-140453136_A>T	other non-conserving	p.V600E	WT
ACH-000516	CAL78_BONE	CAL78_BONE	1290765	SIDM00929	bone	76.0	male	104.75317530000001	chondrosarcoma	Caucasian	DSMZ	Adherent fibroblast, extremely slow. A lot of debris present	RPMI+20%FBS	10%DMSO	240hrs	117.7	Bone:Sarcoma_Chondro	SARC			0.769096			-0.378764	-1.76613			2.38733	2.16057	2.16057	WT	WT	WT	WT	WT	WT	chr17_7577077-7577082_CTCTTC>-	other non-conserving	p.EE286del	WT	WT	WT	WT	WT	WT	WT	WT	WT	WT
ACH-001038	COGE352_BONE			nan	bone																										WT	WT	WT	WT	WT	WT	chr17_7577120-7577120_C>T	other non-conserving	p.R273H	WT	WT	WT	WT	WT	WT	WT	WT	WT	WT
ACH-000765	WM983B_SKIN			nan	skin	nan	nan	173.5115056	malignant_melanoma	Caucasian	GNF	nan	nan	nan	nan	nan	Skin:Melanoma	SKCM		0.0418484			-4.57868				1.32792				WT	WT	WT	WT	WT	WT	chr17_7577105-7577106_GG>AA,chr17_7577106-7577106_G>A	other non-conserving,other non-conserving	p.P278F,p.P278S	WT	WT	WT	WT	WT	WT	chr7_140453136-140453136_A>T	other non-conserving	p.V600E	WT
ACH-000039	SKNMC_BONE			SIDM00634	bone	14.0	female	53.24884517	Ewings_sarcoma-peripheral_primitive_neuroectodermal_tumour	Caucasian	ATCC	Adherent epithelial.	EMEM + 10% FBS	5% DMSO	nan	32.9	Bone:Sarcoma_Ewing	SARC		0.0459571			-4.44357				1.60607				WT	WT	WT	WT	WT	WT	WT	WT	WT	WT	WT	WT	WT	WT	WT	WT	WT	WT	WT
ACH-000485	GSU_STOMACH			nan	gastric	nan	nan	179.88615780000003	carcinoma	Asian	RIKEN	other	RPMI 1640 +10%FBS	nan	nan	nan	Gastric:Carcinoma	STAD		0.0528914			-4.24082				2.02343				WT	WT	WT	WT	WT	WT	chr17_7577124-7577124_C>T	other non-conserving	p.V272M	WT	WT	WT	WT	WT	WT	WT	WT	WT	WT
ACH-000933	SNU324_PANCREAS			nan	pancreas	50.0	male	451.4936983	carcinoma	Asian	KCLB	epithelial;monolayer and floating	RPMI 1640 with L-glutamine (300mg/L), 90%; heat inactivated fetal bovine serum (FBS),10%	nan	52 hrs	nan	Pancreas:Carcinoma	PAAD		0.0289614			-5.10972				0.234736				WT	WT	WT	chr6_33289038-33289038_C>T	other non-conserving	p.E172K	WT	WT	WT	WT	WT	WT	WT	WT	WT	WT	WT	WT	WT
ACH-000836	YD15_SALIVARY_GLAND			nan	upper_aerodigestive	39.0	male	195.99308680000001	carcinoma	Asian	KCLB	epithelial; monolayer	RPMI 1640 with L-glutamine (300mg/L), 90%; heat inactivated fetal bovine serum (FBS),10%	nan	19.8 hrs	nan	Salivary_Gland:Carcinoma	HNSC													chrX_76939133-76939133_G>C	other non-conserving	p.Q539E	WT	WT	WT	chr17_7577508-7577508_T>G	other non-conserving	p.E258A	WT	WT	WT	WT	WT	WT	WT	WT	WT	WT
ACH-000434	NCIH1915_LUNG	NCIH1915_LUNG	1240184	SIDM00763	lung	61.0	female	109.12530009999999	carcinoma	Caucasian	ATCC	adherent	RPMI 1640 +10% FBS	5%DMSO	nan	96.8	Lung:NSCLC_Large_Cell	nan			0.135381			-2.8849	-4.27227			0.231136	-0.520825	-0.520825	WT	WT	WT	WT	WT	WT	chr17_7577067-7577067_T>A	damaging	p.K291*	WT	WT	WT	WT	WT	WT	WT	WT	WT	WT
ACH-000500	SNU46_UPPER_AERODIGESTIVE_TRACT			nan	upper_aerodigestive	66.0	male	nan	carcinoma	Asian	KCLB	Epithelial monolayer	RPMI+10%FBS	?	36hrs	80.3	Upper_Aerodigestive_Tract:Carcinoma	HNSC		0.0138806			-6.17079				-1.94955				WT	WT	WT	WT	WT	WT	chr17_7577548-7577548_C>A	other non-conserving	p.G245C	WT	WT	WT	WT	WT	WT	WT	WT	WT	WT
ACH-002145	ISTSL2_LUNG	ISTSL2_LUNG	753565	SIDM00230	lung	nan	nan	nan	nan	nan	nan	nan	nan	nan	nan	nan	nan	SCLC			2.12814			1.08959	-0.297773			3.65066	3.73162	3.73162	WT	WT	WT	WT	WT	WT	chr17_7577058-7577058_C>A	damaging	p.E294*	WT	WT	WT	WT	WT	WT	chr7_140508691-140508691_C>A	damaging	nan	WT
ACH-001542	KON_UPPER_AERODIGESTIVE_TRACT	KON_UPPER_AERODIGESTIVE_TRACT	1298215	SIDM00604	upper_aerodigestive	nan	nan	nan	nan	nan	nan	nan	nan	nan	nan	nan	nan	HNSC			0.138695			-2.85001	-4.23738			0.261154	-0.483495	-0.483495	chrX_76854892-76854892_T>C	other non-conserving	p.K1982E	WT	WT	WT	chr17_7578190-7578190_T>C	other non-conserving	p.Y220C	WT	WT	WT	WT	WT	WT	WT	WT	WT	WT
ACH-000072	MEG01_HAEMATOPOIETIC_AND_LYMPHOID_TISSUE	MEG01_HAEMATOPOIETIC_AND_LYMPHOID_TISSUE	908126	SIDM00526	blood	55.0	male	98.17774552	haematopoietic_neoplasm	Asian	NIBRI	nan	nan	nan	nan	nan	Leukemia:CML	LCML			0.0877006			-3.51127	-3.51127			-0.307769	0.293393	0.293393	WT	WT	WT	WT	WT	WT	chr17_7577582-7577584_GTG>-	other non-conserving	p.H233del	WT	WT	WT	WT	WT	WT	WT	WT	WT	WT
ACH-001639	ROS50_HAEMATOPOIETIC_AND_LYMPHOID_TISSUE	ROS50_HAEMATOPOIETIC_AND_LYMPHOID_TISSUE	1331025	SIDM00415	blood	nan	nan	nan	nan	nan	nan	nan	nan	nan	nan	nan	nan	nan			0.246134			-2.02248	-2.02248			0.973131	1.88629	1.88629	WT	WT	WT	WT	WT	WT	chr17_7578542-7578542_G>C	other non-conserving	p.L130V	WT	WT	WT	WT	WT	WT	WT	WT	WT	WT
ACH-000131	HS229T_FIBROBLAST			nan	fibroblast	65.0	male	62.62303384	carcinoma	Caucasian	ATCC	Adherent	RPMI+10%FBS	5%DMSO	nan	467.4	Lung:NSCLC_Adeno	LUAD		0.0230041			-5.44197				-0.449217				WT	WT	WT	WT	WT	WT	WT	WT	WT	WT	WT	WT	WT	WT	WT	WT	WT	WT	WT
ACH-000593	BC3C_URINARY_TRACT			nan	urinary_tract	82.0	female	117.99018149999999	carcinoma	Caucasian	DSMZ	adherent monolayers	McCoy's 5A +10% FBS	5% DMSO	nan	40.7	Bladder:Carcinoma	BLCA													WT	WT	WT	WT	WT	WT	chr17_7578205-7578205_C>T	other non-conserving	p.S215N	WT	WT	WT	WT	WT	WT	WT	WT	WT	WT
ACH-002100	DJM1_SKIN	DJM1_SKIN	906841	SIDM00281	skin	nan	nan	nan	nan	nan	nan	nan	nan	nan	nan	nan	nan	nan			0.135841			-2.88001	-4.26738			0.235346	-0.515589	-0.515589	WT	WT	WT	WT	WT	WT	chr17_7577141-7577141_C>A	other non-conserving	p.G266V	WT	WT	WT	WT	WT	WT	WT	WT	WT	WT
ACH-001163	PEDS005TSUSP_KIDNEY			nan	kidney																										WT	WT	WT	WT	WT	WT	chr17_7579347-7579367_AGAAGCCCAGACGGAAACCGT>-	other non-conserving	p.YGFRLGF107del	WT	WT	WT	WT	WT	WT	WT	WT	WT	WT
[truncated: 540 more rows]
[truncated: 86 more columns]
