# Supplementary material for: Integrated evaluation of telomerase activation and telomere maintenance across cancer cell lines
Source: eLife. 2021 Sep 6;10:e66198. doi: 10.7554/eLife.66198 (PMC8530513; doi:10.7554/eLife.66198)
Supplement: Supplementary file 2. [file elife-66198-supp2.xlsx]

## Sheet: Merged_TC_vs_gene_RNA
Supplementary Table S2a: Merged TC vs. gene expression
Correlations of merged log2 z-scored CCLE WGS + GDSC WES TC and expression levels of all genes
gene_id	coef	P_value	Sample_size	Q_value
TSPAN6_ENSG00000000003.10	-0.124251	0.81408	328	0.285821
TNMD_ENSG00000000005.5	-0.0279518	0.23722	328	0.119971
DPM1_ENSG00000000419.8	-0.0306315	0.253033	328	0.122804
SCYL3_ENSG00000000457.9	0.0334754	0.254047	328	0.122889
C1orf112_ENSG00000000460.12	0.0139959	0.154686	328	0.107819
FGR_ENSG00000000938.8	-0.000313787	0.100805	328	0.100043
CFH_ENSG00000000971.11	-0.0803701	0.661909	328	0.21015
FUCA2_ENSG00000001036.9	0.00270592	0.108601	328	0.101424
GCLC_ENSG00000001084.6	-0.0421488	0.325389	328	0.133802
NFYA_ENSG00000001167.10	0.110518	0.879194	328	0.342419
STPG1_ENSG00000001460.13	0.0200673	0.184636	328	0.112036
NIPAL3_ENSG00000001461.12	0.00780235	0.126544	328	0.103782
LAS1L_ENSG00000001497.12	0.15127	0.980233	328	0.576907
ENPP4_ENSG00000001561.6	-0.0650644	0.48468	328	0.163721
SEMA3F_ENSG00000001617.7	0.0495766	0.352205	328	0.138759
CFTR_ENSG00000001626.10	-0.0628439	0.445206	328	0.155716
ANKIB1_ENSG00000001629.5	-0.0452463	0.349765	328	0.138257
CYP51A1_ENSG00000001630.11	-0.004301	0.114578	328	0.102218
KRIT1_ENSG00000001631.10	-0.0206022	0.185423	328	0.112094
RAD52_ENSG00000002016.12	0.135423	0.963327	328	0.494647
MYH16_ENSG00000002079.8	0.0268867	0.225935	328	0.118435
BAD_ENSG00000002330.9	0.0024461	0.107659	328	0.101263
LAP3_ENSG00000002549.8	0.0502909	0.417692	328	0.150864
CD99_ENSG00000002586.13	-0.0311375	0.249174	328	0.121889
HS3ST1_ENSG00000002587.5	-0.201032	0.996453	328	0.770942
AOC1_ENSG00000002726.15	-0.133144	0.91829	328	0.389839
WNT16_ENSG00000002745.8	0.0497781	0.414849	328	0.150144
HECW1_ENSG00000002746.10	-0.0214165	0.191271	328	0.11284
MAD1L1_ENSG00000002822.11	0.0754895	0.553309	328	0.179522
LASP1_ENSG00000002834.13	-0.047123	0.379589	328	0.143439
SNX11_ENSG00000002919.10	0.0725806	0.629134	328	0.199872
TMEM176A_ENSG00000002933.3	-0.0391529	0.310713	328	0.131425
M6PR_ENSG00000003056.3	0.104966	0.830456	328	0.298532
KLHL13_ENSG00000003096.9	-0.0116237	0.142195	328	0.106033
CYP26B1_ENSG00000003137.4	0.0368927	0.293757	328	0.128941
ICA1_ENSG00000003147.13	-0.10533	0.780938	328	0.264946
DBNDD1_ENSG00000003249.9	0.0536696	0.369049	328	0.141568
ALS2_ENSG00000003393.10	0.0374859	0.286571	328	0.127785
CASP10_ENSG00000003400.10	-0.142398	0.94374	328	0.436463
CFLAR_ENSG00000003402.15	-0.0570348	0.446304	328	0.155825
TFPI_ENSG00000003436.10	0.0150575	0.15593	328	0.107998
NDUFAF7_ENSG00000003509.11	0.0799054	0.664011	328	0.210926
RBM5_ENSG00000003756.12	0.138872	0.954589	328	0.465202
MTMR7_ENSG00000003987.9	-0.0284456	0.222343	328	0.117993
SLC7A2_ENSG00000003989.12	0.0689373	0.586565	328	0.187611
ARF5_ENSG00000004059.6	-0.0592836	0.463081	328	0.159202
SARM1_ENSG00000004139.9	-0.00647785	0.120564	328	0.10291
POLDIP2_ENSG00000004142.7	0.041174	0.331398	328	0.134577
PLXND1_ENSG00000004399.8	0.0544488	0.401062	328	0.147999
AK2_ENSG00000004455.12	-0.0514887	0.41606	328	0.15051
CD38_ENSG00000004468.8	-0.0497533	0.329352	328	0.134316
FKBP4_ENSG00000004478.5	0.136209	0.939005	328	0.428042
KDM1A_ENSG00000004487.11	0.0992767	0.804591	328	0.278676
RBM6_ENSG00000004534.10	0.134442	0.949891	328	0.452401
CAMKK1_ENSG00000004660.10	0.0230367	0.198398	328	0.114072
RECQL_ENSG00000004700.11	0.0988328	0.788287	328	0.268894
CCDC132_ENSG00000004766.11	-0.0966387	0.788956	328	0.269299
HSPB6_ENSG00000004776.7	-0.00463044	0.114712	328	0.102233
ARHGAP33_ENSG00000004777.14	0.092626	0.719408	328	0.231429
NDUFAB1_ENSG00000004779.5	0.0047383	0.115802	328	0.102468
PDK4_ENSG00000004799.7	-0.133533	0.952235	328	0.460633
SLC22A16_ENSG00000004809.9	-0.0198244	0.165259	328	0.109377
ZMYND10_ENSG00000004838.9	0.0488751	0.370442	328	0.141871
ABCB5_ENSG00000004846.12	-0.0778265	0.517405	328	0.170601
ARX_ENSG00000004848.6	-0.0183608	0.179048	328	0.111358
SLC25A13_ENSG00000004864.9	0.0732423	0.588136	328	0.188113
ST7_ENSG00000004866.14	0.00021046	0.100657	328	0.100043
CDC27_ENSG00000004897.7	0.147847	0.960822	328	0.484068
SLC4A1_ENSG00000004939.9	-0.00490267	0.117257	328	0.102578
CALCR_ENSG00000004948.9	-0.0294127	0.251635	328	0.122528
HCCS_ENSG00000004961.10	-0.0269748	0.229205	328	0.119001
DVL2_ENSG00000004975.7	0.0689724	0.557102	328	0.180268
PRSS22_ENSG00000005001.5	-0.295804	0.999934	328	0.946294
UPF1_ENSG00000005007.8	0.0376713	0.305985	328	0.130854
SKAP2_ENSG00000005020.8	-0.0972698	0.771975	328	0.259965
SLC25A5_ENSG00000005022.5	0.0171494	0.173294	328	0.110633
CCDC109B_ENSG00000005059.11	-0.0826566	0.694639	328	0.222015
HOXA11_ENSG00000005073.5	-0.0544674	0.429425	328	0.153118
POLR2J_ENSG00000005075.11	-0.0411653	0.317488	328	0.132626
DHX33_ENSG00000005100.8	0.160009	0.979548	328	0.571962
MEOX1_ENSG00000005102.8	0.0168883	0.162295	328	0.108834
THSD7A_ENSG00000005108.11	-0.0303912	0.246142	328	0.121277
LIG3_ENSG00000005156.7	0.141519	0.959494	328	0.478868
RPAP3_ENSG00000005175.5	0.0907264	0.763278	328	0.254422
ACSM3_ENSG00000005187.7	-0.0218739	0.182672	328	0.11185
AC004381.6_ENSG00000005189.15	0.0595458	0.477461	328	0.161926
CIAPIN1_ENSG00000005194.10	0.127955	0.948035	328	0.447267
SPPL2B_ENSG00000005206.12	-1.13782e-05	0.100035	328	0.10002
FAM214B_ENSG00000005238.15	-0.00742467	0.123735	328	0.103384
COPZ2_ENSG00000005243.5	-0.132035	0.90901	328	0.375962
PRKAR2B_ENSG00000005249.8	0.0894638	0.707492	328	0.226548
MSL3_ENSG00000005302.13	0.0198654	0.184245	328	0.112036
CREBBP_ENSG00000005339.8	0.0221275	0.200093	328	0.114178
BZRAP1_ENSG00000005379.11	-0.00263485	0.108008	328	0.101314
MPO_ENSG00000005381.6	-0.036922	0.266894	328	0.124676
PON1_ENSG00000005421.4	-0.0553867	0.45423	328	0.157427
GCFC2_ENSG00000005436.9	0.176071	0.992204	328	0.689041
WDR54_ENSG00000005448.12	0.0357212	0.269454	328	0.124886
CROT_ENSG00000005469.7	-0.0678931	0.539139	328	0.175952
ABCB4_ENSG00000005471.11	-0.118326	0.836234	328	0.302974
KMT2E_ENSG00000005483.15	0.0478011	0.381535	328	0.143917
RHBDD2_ENSG00000005486.12	-8.98209e-05	0.100276	328	0.100041
SOX8_ENSG00000005513.9	0.0518455	0.418303	328	0.151013
IBTK_ENSG00000005700.10	0.0932914	0.775171	328	0.261525
ZNF195_ENSG00000005801.12	-0.0310715	0.244722	328	0.120999
MYCBP2_ENSG00000005810.13	0.0241651	0.202935	328	0.114733
FBXL3_ENSG00000005812.6	0.0098101	0.137924	328	0.105318
ITGAL_ENSG00000005844.13	-0.0191647	0.136796	328	0.1052
PDK2_ENSG00000005882.7	0.027542	0.233427	328	0.119465
ITGA3_ENSG00000005884.13	-0.123921	0.865098	328	0.328005
ZFX_ENSG00000005889.11	0.0309309	0.255993	328	0.123014
LAMP2_ENSG00000005893.11	-0.064719	0.46785	328	0.160247
GGNBP2_ENSG00000005955.8	-0.00132866	0.104348	328	0.100807
ITGA2B_ENSG00000005961.13	0.00527675	0.116505	328	0.102563
ASB4_ENSG00000005981.8	-0.0912632	0.769878	328	0.258776
GDE1_ENSG00000006007.7	-0.0563663	0.472139	328	0.161264
C19orf60_ENSG00000006015.13	-0.0302776	0.247109	328	0.121465
CRLF1_ENSG00000006016.6	0.00881443	0.132188	328	0.104634
OSBPL7_ENSG00000006025.7	-0.072502	0.601661	328	0.19254
TMEM98_ENSG00000006042.7	-0.105941	0.827886	328	0.296453
YBX2_ENSG00000006047.8	-0.0469877	0.330805	328	0.134422
KRT33A_ENSG00000006059.3	-0.0787517	0.654504	328	0.20822
MAP3K14_ENSG00000006062.9	0.0997661	0.786288	328	0.268186
ABCC8_ENSG00000006071.7	-0.00231945	0.106998	328	0.101134
CCL18_ENSG00000006074.4	-0.109757	0.800007	328	0.275635
CCL3_ENSG00000006075.11	-0.0795546	0.512863	328	0.169478
SYNRG_ENSG00000006114.11	0.0926638	0.75381	328	0.248741
CACNG3_ENSG00000006116.3	-0.0886007	0.778801	328	0.264262
TMEM132A_ENSG00000006118.10	-0.0189999	0.156826	328	0.108123
AP2B1_ENSG00000006125.12	0.0909048	0.733038	328	0.23767
TAC1_ENSG00000006128.7	0.000490694	0.101489	328	0.100179
ZNF263_ENSG00000006194.6	0.0163506	0.167082	328	0.109663
CX3CL1_ENSG00000006210.6	-0.118437	0.880229	328	0.34291
SPATA20_ENSG00000006282.15	-0.0234847	0.202331	328	0.114634
CACNA1G_ENSG00000006283.13	0.135434	0.950088	328	0.452694
TNFRSF12A_ENSG00000006327.9	-0.0920032	0.666701	328	0.21163
DLX6_ENSG00000006377.9	0.0856123	0.668696	328	0.212608
MAP3K9_ENSG00000006432.11	-0.126448	0.852126	328	0.31758
RALA_ENSG00000006451.3	-0.0813126	0.673557	328	0.214207
BAIAP2L1_ENSG00000006453.9	-0.128083	0.831813	328	0.29921
JHDM1D_ENSG00000006459.6	-0.0652033	0.503674	328	0.167635
ETV1_ENSG00000006468.9	0.0637574	0.457751	328	0.158243
AGK_ENSG00000006530.11	0.0784144	0.593158	328	0.189743
ALDH3B1_ENSG00000006534.11	-0.148864	0.976766	328	0.552924
TTC22_ENSG00000006555.6	-0.133225	0.917353	328	0.389098
PHTF2_ENSG00000006576.12	0.0346685	0.269807	328	0.124895
CCL26_ENSG00000006606.4	-0.0918408	0.737826	328	0.239671
FARP2_ENSG00000006607.9	0.0739188	0.551202	328	0.178967
USH1C_ENSG00000006611.11	-0.0149052	0.14927	328	0.107004
GGCT_ENSG00000006625.13	-0.0596705	0.454911	328	0.157668
DBF4_ENSG00000006634.3	0.00845833	0.130003	328	0.104286
TBXA2R_ENSG00000006638.7	0.263828	0.999945	328	0.949223
IFRD1_ENSG00000006652.9	-0.0384025	0.295174	328	0.129043
LGALS14_ENSG00000006659.8	0.0226041	0.205504	328	0.115263
COX10_ENSG00000006695.6	0.0585683	0.472733	328	0.161304
GTF2IRD1_ENSG00000006704.6	-0.00869309	0.126974	328	0.103883
PAF1_ENSG00000006712.10	0.0583086	0.470001	328	0.160723
VPS41_ENSG00000006715.11	-0.0533014	0.427452	328	0.153
ARHGAP44_ENSG00000006740.12	-0.0551641	0.444922	328	0.155643
ELAC2_ENSG00000006744.14	0.106544	0.87202	328	0.334451
SCIN_ENSG00000006747.10	-0.0366176	0.302586	328	0.130328
ARSD_ENSG00000006756.11	-0.168238	0.982142	328	0.591783
PNPLA4_ENSG00000006757.7	-0.0613694	0.495532	328	0.165725
MYH13_ENSG00000006788.8	0.0390167	0.325749	328	0.133864
ADIPOR2_ENSG00000006831.9	0.0836838	0.727661	328	0.235319
CDKL3_ENSG00000006837.7	0.0685504	0.551817	328	0.179061
UPP2_ENSG00000007001.8	0.0204581	0.190432	328	0.112701
PRSS21_ENSG00000007038.6	-0.00791934	0.128208	328	0.104017
MARK4_ENSG00000007047.10	0.0997563	0.813343	328	0.284857
PROM1_ENSG00000007062.7	-0.039981	0.315917	328	0.132402
CCDC124_ENSG00000007080.6	0.0920971	0.759565	328	0.252006
CEACAM21_ENSG00000007129.13	-0.0815094	0.399246	328	0.147734
PAFAH1B1_ENSG00000007168.8	0.0637841	0.513993	328	0.169915
NOS2_ENSG00000007171.12	0.0636052	0.534379	328	0.174572
DNAH9_ENSG00000007174.13	0.0176455	0.166644	328	0.109589
KIAA0100_ENSG00000007202.10	0.136586	0.95241	328	0.461061
SLC13A2_ENSG00000007216.10	-0.0342838	0.283368	328	0.127222
GAS7_ENSG00000007237.14	-0.076773	0.457807	328	0.158243
TRAPPC6A_ENSG00000007255.6	-0.166919	0.985593	328	0.619473
MATK_ENSG00000007264.9	0.1472	0.965601	328	0.503581
CEACAM7_ENSG00000007306.10	-0.0383616	0.316668	328	0.132538
CD79B_ENSG00000007312.8	-0.0333498	0.237068	328	0.119925
SCN4A_ENSG00000007314.7	0.0288079	0.236255	328	0.119806
ST7L_ENSG00000007341.14	0.138978	0.926314	328	0.405436
TKTL1_ENSG00000007350.12	0.0314751	0.260245	328	0.123394
PAX6_ENSG00000007372.16	0.0621155	0.514853	328	0.169992
RPUSD1_ENSG00000007376.3	0.0169024	0.1702	328	0.110081
RHBDF1_ENSG00000007384.11	-0.0543486	0.369296	328	0.141581
LUC7L_ENSG00000007392.12	0.100269	0.826255	328	0.295034
CACNA2D2_ENSG00000007402.7	0.0456657	0.35678	328	0.139308
BAIAP3_ENSG00000007516.9	-0.104095	0.82409	328	0.293491
TSR3_ENSG00000007520.3	-0.0301298	0.24679	328	0.121396
PIGQ_ENSG00000007541.10	0.0327225	0.258424	328	0.123187
CRAMP1L_ENSG00000007545.11	0.0342615	0.273794	328	0.125534
TEAD3_ENSG00000007866.14	-0.0271377	0.207012	328	0.115526
SELE_ENSG00000007908.11	0.0347558	0.290897	328	0.128507
DNAJC11_ENSG00000007923.11	0.114328	0.900071	328	0.363018
FMO3_ENSG00000007933.8	0.0441555	0.354783	328	0.139104
MYLIP_ENSG00000007944.10	-0.0871871	0.703194	328	0.225064
NOX1_ENSG00000007952.13	0.00790624	0.124958	328	0.103638
E2F2_ENSG00000007968.6	0.13071	0.905352	328	0.370849
PSMB1_ENSG00000008018.8	0.117223	0.913666	328	0.383624
SYN1_ENSG00000008056.8	-0.0491493	0.363813	328	0.140658
JARID2_ENSG00000008083.9	0.0774767	0.606663	328	0.193923
CDKL5_ENSG00000008086.6	-0.0288672	0.240541	328	0.120364
CAMK1G_ENSG00000008118.5	-0.0208358	0.187083	328	0.11227
CDK11A_ENSG00000008128.18	0.0665923	0.568822	328	0.183112
NADK_ENSG00000008130.11	0.0668024	0.552715	328	0.179421
TFAP2B_ENSG00000008196.8	0.016366	0.166326	328	0.10952
TFAP2D_ENSG00000008197.4	0.0504855	0.426837	328	0.152865
DLEC1_ENSG00000008226.15	-0.0762872	0.656318	328	0.208692
CYTH3_ENSG00000008256.11	-0.121436	0.889498	328	0.351934
ADAM22_ENSG00000008277.10	0.188507	0.994651	328	0.734338
SYPL1_ENSG00000008282.3	-0.0414766	0.322451	328	0.1332
CYB561_ENSG00000008283.11	-0.211347	0.996278	328	0.767007
SPAG9_ENSG00000008294.16	0.0504013	0.381049	328	0.143859
CELSR3_ENSG00000008300.10	0.0143482	0.151307	328	0.107348
AASS_ENSG00000008311.10	0.178533	0.991262	328	0.682206
PLEKHG6_ENSG00000008323.11	-0.144245	0.906619	328	0.372715
SS18L2_ENSG00000008324.6	0.0806029	0.663096	328	0.210596
MPND_ENSG00000008382.11	0.025402	0.21971	328	0.117485
MGST1_ENSG00000008394.8	-0.1284	0.939077	328	0.428042
CRY1_ENSG00000008405.7	0.162307	0.976172	328	0.549672
PGLYRP1_ENSG00000008438.4	-0.0171514	0.169979	328	0.110053
NFIX_ENSG00000008441.12	0.0215641	0.186985	328	0.11227
ST3GAL1_ENSG00000008513.10	-0.0158304	0.159001	328	0.108298
MMP25_ENSG00000008516.12	0.00524738	0.117149	328	0.102578
IL32_ENSG00000008517.12	-0.0865552	0.64972	328	0.206668
PKD1_ENSG00000008710.13	0.117149	0.899749	328	0.362665
MAPK8IP2_ENSG00000008735.10	0.0443778	0.334342	328	0.135373
MED24_ENSG00000008838.13	0.0647201	0.553514	328	0.179614
RHOBTB2_ENSG00000008853.12	-0.0478495	0.378248	328	0.143195
HEATR5B_ENSG00000008869.7	0.0161225	0.163528	328	0.10899
SEC62_ENSG00000008952.12	-0.0105893	0.140682	328	0.105741
RPS20_ENSG00000008988.5	0.0212869	0.193256	328	0.113231
CSDE1_ENSG00000009307.11	0.0950592	0.783552	328	0.266194
UBE3C_ENSG00000009335.13	0.0394287	0.303241	328	0.130512
REV3L_ENSG00000009413.11	0.0581224	0.47033	328	0.160813
TENM1_ENSG00000009694.9	0.0823556	0.702146	328	0.224705
PAX7_ENSG00000009709.7	0.00766779	0.125862	328	0.103776
MASP2_ENSG00000009724.12	0.0515448	0.424561	328	0.152326
IYD_ENSG00000009765.10	-0.0226578	0.191227	328	0.112819
FAM76A_ENSG00000009780.11	-0.0227227	0.196788	328	0.113923
TRAF3IP3_ENSG00000009790.10	-0.171181	0.906673	328	0.372789
POMT2_ENSG00000009830.7	0.122015	0.871614	328	0.334063
VTA1_ENSG00000009844.11	0.170995	0.992511	328	0.693725
MLXIPL_ENSG00000009950.11	-0.0789528	0.594386	328	0.189831
BAZ1B_ENSG00000009954.6	0.119507	0.8924	328	0.354821
RANBP9_ENSG00000010017.9	0.0476796	0.372538	328	0.142089
ETV7_ENSG00000010030.9	-0.157532	0.984464	328	0.608995
SPRTN_ENSG00000010072.11	0.0437512	0.351561	328	0.138686
METTL13_ENSG00000010165.15	0.0493006	0.398779	328	0.147666
DYRK4_ENSG00000010219.9	0.0788208	0.682146	328	0.217519
ZNF207_ENSG00000010244.12	0.10443	0.834591	328	0.301497
UQCRC1_ENSG00000010256.6	0.100128	0.782724	328	0.266102
STARD3NL_ENSG00000010270.9	-0.0934499	0.723474	328	0.233577
CD9_ENSG00000010278.7	-0.13143	0.881118	328	0.34351
HHATL_ENSG00000010282.10	0.0604824	0.520041	328	0.171264
NCAPD2_ENSG00000010292.8	0.251112	0.999969	328	0.959633
IFFO1_ENSG00000010295.15	0.211553	0.906094	328	0.371792
GIPR_ENSG00000010310.4	-0.0290729	0.240265	328	0.120331
PHF7_ENSG00000010318.15	0.150011	0.967411	328	0.510061
SEMA3G_ENSG00000010319.2	0.0678351	0.554559	328	0.179648
NISCH_ENSG00000010322.11	0.133086	0.947078	328	0.445224
STAB1_ENSG00000010327.6	0.0534358	0.429907	328	0.153228
FUZ_ENSG00000010361.9	0.0677125	0.493791	328	0.165434
SLC6A13_ENSG00000010379.11	0.0791075	0.660326	328	0.209733
IDS_ENSG00000010404.13	-0.105031	0.810897	328	0.282146
PRSS3_ENSG00000010438.12	-0.194584	0.991897	328	0.68453
ZNF200_ENSG00000010539.7	0.0575083	0.462503	328	0.159146
CD4_ENSG00000010610.5	0.0841208	0.487369	328	0.164202
LRRC23_ENSG00000010626.10	0.0403689	0.322853	328	0.133234
BTK_ENSG00000010671.11	-0.0379076	0.17506	328	0.110838
HFE_ENSG00000010704.14	0.0266329	0.208939	328	0.115868
SCMH1_ENSG00000010803.12	0.182319	0.994443	328	0.729687
FYN_ENSG00000010810.13	0.00956337	0.131683	328	0.104513
HIVEP2_ENSG00000010818.4	0.0229919	0.205428	328	0.115254
FMO1_ENSG00000010932.11	0.0900442	0.750977	328	0.247673
TCEB3_ENSG00000011007.8	0.121366	0.870192	328	0.332556
LYPLA2_ENSG00000011009.6	-0.0261723	0.224036	328	0.118231
CLCN6_ENSG00000011021.17	0.0838122	0.694268	328	0.221851
MRC2_ENSG00000011028.9	0.128376	0.88548	328	0.347396
None_ENSG00000011052.17	0.00905005	0.133636	328	0.104926
SLC6A7_ENSG00000011083.4	-0.00344759	0.110365	328	0.101673
TSPAN9_ENSG00000011105.7	0.0443763	0.320786	328	0.132885
BTBD7_ENSG00000011114.10	0.0326839	0.259097	328	0.123187
APBA3_ENSG00000011132.7	0.0755581	0.628721	328	0.199768
MKS1_ENSG00000011143.12	0.0597058	0.466621	328	0.160034
ABHD5_ENSG00000011198.3	0.000979448	0.103134	328	0.100494
KAL1_ENSG00000011201.6	-0.0679273	0.561743	328	0.181174
AKAP8L_ENSG00000011243.13	-0.00726674	0.1253	328	0.103696
MBTD1_ENSG00000011258.11	0.0630536	0.491654	328	0.164725
UTP18_ENSG00000011260.9	0.117245	0.902523	328	0.3668
RNF216_ENSG00000011275.14	0.0731072	0.577128	328	0.185063
TTC19_ENSG00000011295.11	0.0178639	0.174057	328	0.110752
PTBP1_ENSG00000011304.12	0.13371	0.955968	328	0.469321
DPF1_ENSG00000011332.15	0.0408813	0.299295	328	0.129743
SYT7_ENSG00000011347.5	-0.0133566	0.141942	328	0.106004
LARS2_ENSG00000011376.5	0.193904	0.997372	328	0.792443
PIK3C2A_ENSG00000011405.9	0.0100973	0.136706	328	0.1052
PLAUR_ENSG00000011422.7	-0.117384	0.88444	328	0.346528
ANLN_ENSG00000011426.6	-0.0328079	0.249356	328	0.121961
WIZ_ENSG00000011451.13	0.0966212	0.786791	328	0.26848
RABGAP1_ENSG00000011454.12	-0.114139	0.862799	328	0.326241
DCN_ENSG00000011465.12	0.0301155	0.247093	328	0.121465
QPCTL_ENSG00000011478.7	0.215791	0.998847	328	0.846846
PPP5C_ENSG00000011485.10	0.0862581	0.695397	328	0.222161
CEP68_ENSG00000011523.9	0.0286843	0.228917	328	0.118936
MAP4K3_ENSG00000011566.10	-0.0708877	0.520905	328	0.171489
ZBTB32_ENSG00000011590.9	-0.177986	0.965341	328	0.501483
TYROBP_ENSG00000011600.7	0.154186	0.539261	328	0.175992
TMEM159_ENSG00000011638.6	-0.190447	0.99664	328	0.773766
GABRA3_ENSG00000011677.8	0.106605	0.814065	328	0.285821
BRCA1_ENSG00000012048.15	0.0304724	0.232856	328	0.119444
ERCC1_ENSG00000012061.11	0.0908862	0.707087	328	0.226535
CD22_ENSG00000012124.10	-0.190395	0.995438	328	0.744182
SEMA3B_ENSG00000012171.13	-0.123622	0.881835	328	0.344501
MBTPS2_ENSG00000012174.7	0.044917	0.336906	328	0.136014
PRICKLE3_ENSG00000012211.8	-0.0643476	0.519214	328	0.171016
LTF_ENSG00000012223.8	-0.00156774	0.10511	328	0.100959
EXTL3_ENSG00000012232.4	0.054505	0.394393	328	0.146716
NR1H4_ENSG00000012504.9	0.0578098	0.451811	328	0.156849
ELOVL5_ENSG00000012660.9	0.10431	0.742056	328	0.242368
ALOX5_ENSG00000012779.6	-0.0545858	0.433294	328	0.15398
KDM5D_ENSG00000012817.11	0.0466483	0.354288	328	0.139042
CALCOCO1_ENSG00000012822.11	0.00321893	0.111164	328	0.10174
UBR7_ENSG00000012963.9	0.0416827	0.319114	328	0.13268
MAP4K5_ENSG00000012983.7	-0.0550072	0.421777	328	0.151712
EHD3_ENSG00000013016.10	-0.0625809	0.448454	328	0.156154
PSMC4_ENSG00000013275.3	0.0545107	0.43994	328	0.154904
MAN2B2_ENSG00000013288.4	0.0700712	0.578711	328	0.185634
SLC7A14_ENSG00000013293.5	-0.00406036	0.113125	328	0.101975
CLDN11_ENSG00000013297.6	0.0675	0.563848	328	0.181543
SLC25A39_ENSG00000013306.11	-0.0135047	0.148388	328	0.106954
MVP_ENSG00000013364.14	-0.106835	0.842666	328	0.308732
NUB1_ENSG00000013374.11	0.00527638	0.117288	328	0.102578
PGM3_ENSG00000013375.11	0.154962	0.974362	328	0.540142
RWDD2A_ENSG00000013392.6	0.0942963	0.787952	328	0.268732
CLK1_ENSG00000013441.11	-0.0131626	0.151326	328	0.107351
POLR3B_ENSG00000013503.5	0.163354	0.988201	328	0.64466
ANGEL1_ENSG00000013523.5	0.00156651	0.104777	328	0.100909
RNF14_ENSG00000013561.13	0.0957092	0.752659	328	0.248388
DNASE1L1_ENSG00000013563.9	-0.0159992	0.164828	328	0.109298
DDX11_ENSG00000013573.12	0.0710675	0.570491	328	0.183553
HEBP1_ENSG00000013583.4	0.0118958	0.144137	328	0.106262
GPRC5A_ENSG00000013588.5	-0.240841	0.999704	328	0.897831
MAMLD1_ENSG00000013619.9	0.00224316	0.106927	328	0.101124
CD6_ENSG00000013725.10	-0.0465858	0.382578	328	0.144122
TACC3_ENSG00000013810.14	0.186962	0.996817	328	0.777758
UFL1_ENSG00000014123.9	0.138189	0.964035	328	0.497217
POLA2_ENSG00000014138.4	0.0685833	0.565814	328	0.182263
ZC3H3_ENSG00000014164.6	-0.0505705	0.407431	328	0.149044
CAPN1_ENSG00000014216.11	-0.0931651	0.737566	328	0.239476
ACPP_ENSG00000014257.11	-0.165444	0.988785	328	0.647922
MDH1_ENSG00000014641.13	-0.0115133	0.142784	328	0.106054
SLC30A9_ENSG00000014824.9	-0.0449992	0.357379	328	0.139413
MTMR11_ENSG00000014914.15	-0.0980656	0.800748	328	0.276246
COX15_ENSG00000014919.8	0.134562	0.954991	328	0.46652
CCDC88C_ENSG00000015133.14	-0.0782102	0.513095	328	0.169514
YAF2_ENSG00000015153.10	0.083994	0.707873	328	0.22671
ZMYND11_ENSG00000015171.14	0.150463	0.962116	328	0.489485
WAS_ENSG00000015285.6	-0.145262	0.452379	328	0.157038
DPEP1_ENSG00000015413.5	0.0603728	0.432231	328	0.153806
BID_ENSG00000015475.14	-0.0715721	0.602941	328	0.192667
MATR3_ENSG00000015479.13	0.122467	0.90389	328	0.3694
NPC1L1_ENSG00000015520.10	-0.0163876	0.166799	328	0.109628
XYLT2_ENSG00000015532.5	-0.00315494	0.109985	328	0.101585
RGPD5_ENSG00000015568.8	0.0424757	0.324127	328	0.133505
STMN4_ENSG00000015592.12	-0.00232338	0.10772	328	0.101263
NUDCD3_ENSG00000015676.13	-0.000434415	0.101327	328	0.100146
ISL1_ENSG00000016082.10	0.0456151	0.352764	328	0.138837
CHDH_ENSG00000016391.6	-0.00497947	0.114072	328	0.102157
IL20RA_ENSG00000016402.8	-0.117324	0.830597	328	0.298625
CLCA1_ENSG00000016490.11	-0.0280972	0.24311	328	0.12084
CLCA4_ENSG00000016602.8	0.0211192	0.196347	328	0.113857
GLT8D1_ENSG00000016864.12	0.182862	0.988839	328	0.648376
ATP2C1_ENSG00000017260.15	-0.0439962	0.350901	328	0.138574
SRCIN1_ENSG00000017373.11	-0.0687597	0.507431	328	0.168496
IGF1_ENSG00000017427.11	0.0732218	0.593048	328	0.189743
SLC38A5_ENSG00000017483.10	-0.0690986	0.506193	328	0.168285
MAGIX_ENSG00000017621.11	-0.121501	0.895265	328	0.357877
RALBP1_ENSG00000017797.7	0.122653	0.928512	328	0.409413
RUFY3_ENSG00000018189.8	0.0718383	0.575147	328	0.184783
CNTN1_ENSG00000018236.10	0.0298749	0.236666	328	0.119878
SLC11A1_ENSG00000018280.12	0.0232907	0.195538	328	0.113694
WWTR1_ENSG00000018408.10	-0.07063	0.491314	328	0.164725
AGPS_ENSG00000018510.8	0.00386124	0.111401	328	0.10174
ZNF806_ENSG00000018607.5	-0.0690768	0.608893	328	0.19452
CXorf56_ENSG00000018610.9	-0.0733903	0.625795	328	0.19845
ATP1A2_ENSG00000018625.10	-0.0568799	0.450841	328	0.156583
TTC27_ENSG00000018699.7	0.0440555	0.367362	328	0.141094
ZNF582_ENSG00000018869.12	0.0601861	0.445406	328	0.155716
VSIG2_ENSG00000019102.7	0.0103847	0.137356	328	0.105212
PHLDB1_ENSG00000019144.12	0.0319095	0.232471	328	0.119414
MARCO_ENSG00000019169.9	-0.0684685	0.57119	328	0.183801
CYP24A1_ENSG00000019186.5	-0.123362	0.925594	328	0.403469
PRDM11_ENSG00000019485.8	-0.027656	0.232148	328	0.11935
SYT13_ENSG00000019505.3	-0.087886	0.729911	328	0.236224
SNAI2_ENSG00000019549.4	0.0217669	0.173784	328	0.110688
CD74_ENSG00000019582.10	-0.185725	0.992152	328	0.688131
HGF_ENSG00000019991.11	0.0306201	0.228841	328	0.118936
ZRANB1_ENSG00000019995.6	0.0702601	0.59473	328	0.189918
NCDN_ENSG00000020129.11	0.133463	0.939526	328	0.428362
GPR124_ENSG00000020181.13	0.0854965	0.620924	328	0.197136
CCT8L1P_ENSG00000020219.8	0.0217602	0.198886	328	0.114102
ZFP64_ENSG00000020256.15	0.0920503	0.756947	328	0.250543
MNAT1_ENSG00000020426.6	-0.0792555	0.611924	328	0.195376
SAMD4A_ENSG00000020577.9	-0.059424	0.476637	328	0.16177
RUNX3_ENSG00000020633.14	0.0472913	0.334068	328	0.135283
MRE11A_ENSG00000020922.8	0.0223189	0.195145	328	0.113622
PLEKHB1_ENSG00000021300.9	-0.0684689	0.565826	328	0.182263
SERPINB1_ENSG00000021355.8	-0.210471	0.998136	328	0.818001
CYP3A43_ENSG00000021461.12	0.0253658	0.219562	328	0.117441
SLC7A9_ENSG00000021488.8	0.0715364	0.622582	328	0.197975
SPAST_ENSG00000021574.7	0.168274	0.980384	328	0.577943
NRXN3_ENSG00000021645.13	-0.0738837	0.612327	328	0.195517
OSBPL5_ENSG00000021762.15	-0.0348693	0.264492	328	0.124208
AQR_ENSG00000021776.6	0.133259	0.954552	328	0.465111
CPS1_ENSG00000021826.10	0.0498656	0.400492	328	0.147979
C8B_ENSG00000021852.8	-0.0203212	0.185677	328	0.112117
FHL1_ENSG00000022267.12	0.0283832	0.216121	328	0.116993
RTFDC1_ENSG00000022277.8	-0.153283	0.980755	328	0.580375
GABRA1_ENSG00000022355.10	0.0786847	0.695098	328	0.222027
NLRP2_ENSG00000022556.11	0.0975772	0.808658	328	0.280997
SLC45A4_ENSG00000022567.5	0.0120149	0.142747	328	0.106054
RNF10_ENSG00000022840.11	0.0215123	0.19478	328	0.113549
ZNF839_ENSG00000022976.11	-0.00171976	0.105329	328	0.100989
ZDHHC6_ENSG00000023041.7	-0.00741198	0.12551	328	0.103723
GRAMD1B_ENSG00000023171.10	-0.033437	0.267076	328	0.124719
RNH1_ENSG00000023191.12	0.031862	0.253736	328	0.122881
NDUFS1_ENSG00000023228.9	0.122894	0.914168	328	0.384434
RB1CC1_ENSG00000023287.8	0.113735	0.89092	328	0.35393
ERP44_ENSG00000023318.7	0.00477985	0.11582	328	0.102468
ALAS1_ENSG00000023330.10	0.0654603	0.532208	328	0.174051
BIRC3_ENSG00000023445.9	-0.0934673	0.753809	328	0.248741
AKAP11_ENSG00000023516.7	0.0258599	0.217814	328	0.117137
GLRX2_ENSG00000023572.4	-0.0354301	0.2766	328	0.125994
SNAPC1_ENSG00000023608.4	-0.0177309	0.165726	328	0.109457
DERA_ENSG00000023697.8	0.0123219	0.143731	328	0.106257
STRAP_ENSG00000023734.6	0.192895	0.998214	328	0.818474
ABCC2_ENSG00000023839.6	-0.0120758	0.145265	328	0.106447
DEF6_ENSG00000023892.9	-0.205066	0.99225	328	0.689231
PLEKHO1_ENSG00000023902.9	0.0969999	0.755663	328	0.249683
GCLM_ENSG00000023909.5	0.0657653	0.544595	328	0.177199
UBR2_ENSG00000024048.6	0.094558	0.78754	328	0.268732
EHD2_ENSG00000024422.7	-0.0759066	0.592892	328	0.189743
DEPDC1_ENSG00000024526.12	0.199658	0.997641	328	0.798542
CCDC28A_ENSG00000024862.12	0.0230187	0.200541	328	0.114259
RRAGD_ENSG00000025039.10	0.0666425	0.528371	328	0.173216
HSF2_ENSG00000025156.8	0.196807	0.997825	328	0.803569
PHF20_ENSG00000025293.11	0.0822278	0.684693	328	0.218177
HSD17B6_ENSG00000025423.7	0.102668	0.795165	328	0.27254
NR1H3_ENSG00000025434.14	-0.0898561	0.727979	328	0.235319
TYMP_ENSG00000025708.8	-0.082391	0.701194	328	0.224216
NCAPH2_ENSG00000025770.14	0.0542446	0.437649	328	0.154736
TOMM34_ENSG00000025772.7	0.0648222	0.534899	328	0.174692
SEC63_ENSG00000025796.9	0.222213	0.999767	328	0.905306
KPNA6_ENSG00000025800.9	0.0499291	0.405062	328	0.148544
VIM_ENSG00000026025.9	0.0843047	0.58825	328	0.188113
None_ENSG00000026036.16	0.011541	0.141888	328	0.105985
FAS_ENSG00000026103.15	-0.161215	0.971561	328	0.530142
RNASET2_ENSG00000026297.11	-0.120982	0.861903	328	0.325385
CD44_ENSG00000026508.12	-0.11005	0.844102	328	0.310606
KCNG1_ENSG00000026559.9	0.0825693	0.650985	328	0.206886
AGPAT4_ENSG00000026652.9	0.156394	0.971024	328	0.528764
SLAMF7_ENSG00000026751.12	-0.0920506	0.710478	328	0.227739
BTN3A1_ENSG00000026950.12	-0.0209564	0.188633	328	0.112439
MIPEP_ENSG00000027001.7	0.0726794	0.551382	328	0.178973
PRKCH_ENSG00000027075.9	-0.174042	0.989229	328	0.654333
INSRR_ENSG00000027644.4	-0.0348032	0.276528	328	0.125994
IFNGR1_ENSG00000027697.8	-0.0882912	0.730197	328	0.236313
B4GALT7_ENSG00000027847.9	-0.0167671	0.164581	328	0.109194
SH2D2A_ENSG00000027869.7	-0.00955475	0.131925	328	0.104577
VRK2_ENSG00000028116.12	0.0114004	0.137708	328	0.10525
TNFRSF1B_ENSG00000028137.12	-0.175579	0.982155	328	0.591783
VEZT_ENSG00000028203.13	0.0648217	0.474613	328	0.161491
POU2F2_ENSG00000028277.16	0.0587442	0.447643	328	0.156118
BRD9_ENSG00000028310.13	0.0874362	0.722926	328	0.233419
SNX1_ENSG00000028528.10	0.0176398	0.171006	328	0.110191
TBPL1_ENSG00000028839.5	0.103763	0.815911	328	0.287226
ARNTL2_ENSG00000029153.10	0.0335551	0.244726	328	0.120999
BCLAF1_ENSG00000029363.11	0.169278	0.990004	328	0.66497
SLC39A9_ENSG00000029364.7	-0.0738587	0.581498	328	0.18635
ANK1_ENSG00000029534.15	-0.0528903	0.43313	328	0.153928
IBSP_ENSG00000029559.5	0.00317922	0.110744	328	0.10174
TFB1M_ENSG00000029639.6	0.109624	0.848812	328	0.315087
RABEP1_ENSG00000029725.12	0.126632	0.923638	328	0.399191
HMGB3_ENSG00000029993.10	-0.0136636	0.146711	328	0.106689
NUP160_ENSG00000030066.9	0.0682266	0.552113	328	0.1792
BAK1_ENSG00000030110.8	0.0894453	0.743307	328	0.24294
MUSK_ENSG00000030304.8	-0.0168574	0.171849	328	0.110361
IKZF2_ENSG00000030419.12	-0.100083	0.790748	328	0.269683
GRN_ENSG00000030582.12	-0.0699751	0.585497	328	0.187319
FAM13B_ENSG00000031003.6	-0.00635824	0.122446	328	0.103197
ARHGAP31_ENSG00000031081.6	0.10725	0.75417	328	0.24882
NR2E3_ENSG00000031544.10	0.0150815	0.160276	328	0.108454
CENPQ_ENSG00000031691.6	0.0450912	0.360861	328	0.140213
SARS_ENSG00000031698.8	0.0872409	0.736223	328	0.239067
RANBP3_ENSG00000031823.10	0.117798	0.912979	328	0.38195
ARID4A_ENSG00000032219.14	-0.0620434	0.495632	328	0.165741
TSSC1_ENSG00000032389.8	0.0333629	0.265553	328	0.124449
PNPLA6_ENSG00000032444.11	0.0318234	0.254365	328	0.122907
IFT88_ENSG00000032742.13	0.125769	0.924851	328	0.401891
ALG1_ENSG00000033011.7	-0.0207162	0.190369	328	0.1127
ZCCHC8_ENSG00000033030.9	0.1389	0.953069	328	0.462192
ABCF2_ENSG00000033050.3	0.108937	0.84515	328	0.311496
CHPF2_ENSG00000033100.10	-0.013597	0.147109	328	0.106737
LRRC7_ENSG00000033122.14	0.0734895	0.616182	328	0.196411
FUT8_ENSG00000033170.12	-0.156115	0.983796	328	0.605596
UBA6_ENSG00000033178.8	0.0364861	0.297783	328	0.129432
GAB2_ENSG00000033327.8	-0.113628	0.870533	328	0.332556
ATP6V0A1_ENSG00000033627.10	0.0218555	0.187789	328	0.112278
PIAS1_ENSG00000033800.9	0.0499935	0.393075	328	0.146421
SLC4A7_ENSG00000033867.12	0.069266	0.562355	328	0.181225
APBA2_ENSG00000034053.10	0.136363	0.908391	328	0.37552
UHRF1_ENSG00000034063.9	0.104272	0.841061	328	0.30748
MAP2K3_ENSG00000034152.14	0.0386183	0.306646	328	0.130955
EFCAB1_ENSG00000034239.6	-0.0592886	0.489516	328	0.164374
TMSB10_ENSG00000034510.4	-0.0486762	0.364349	328	0.140801
ASTE1_ENSG00000034533.7	-0.100164	0.824566	328	0.293802
RNF19A_ENSG00000034677.7	-0.0804913	0.663733	328	0.210818
PEX3_ENSG00000034693.10	0.101574	0.831345	328	0.298883
GABARAPL2_ENSG00000034713.3	0.0519319	0.413436	328	0.150044
MYOC_ENSG00000034971.10	0.0535462	0.453423	328	0.157248
SH3YL1_ENSG00000035115.17	-0.191563	0.994879	328	0.736506
FAM136A_ENSG00000035141.3	0.089204	0.675001	328	0.21493
VCL_ENSG00000035403.12	0.122921	0.877314	328	0.34046
DEPDC1B_ENSG00000035499.8	0.0619476	0.51121	328	0.169123
DAPK2_ENSG00000035664.7	0.0260605	0.210911	328	0.116157
NSMAF_ENSG00000035681.3	0.0556414	0.4274	328	0.153
ADSS_ENSG00000035687.9	0.0211351	0.193769	328	0.113279
STAP1_ENSG00000035720.3	0.0377709	0.242106	328	0.120584
TIMP2_ENSG00000035862.8	-0.0320083	0.232151	328	0.11935
RFC1_ENSG00000035928.10	0.161033	0.987188	328	0.635178
TBC1D23_ENSG00000036054.8	0.0122964	0.14756	328	0.106789
CUL3_ENSG00000036257.8	0.0782923	0.660501	328	0.209733
MYOM2_ENSG00000036448.5	-0.0179208	0.16928	328	0.10992
OTC_ENSG00000036473.6	-0.00254854	0.108284	328	0.10136
CYP46A1_ENSG00000036530.4	0.0447411	0.355943	328	0.139172
ZZZ3_ENSG00000036549.8	0.116623	0.896328	328	0.358622
SLC18A1_ENSG00000036565.10	0.0369613	0.290549	328	0.128488
USP2_ENSG00000036672.11	0.104322	0.816268	328	0.287491
CASR_ENSG00000036828.9	0.0563786	0.490896	328	0.164715
TUBG2_ENSG00000037042.8	0.0172546	0.164362	328	0.109169
RPL26L1_ENSG00000037241.3	0.0597838	0.486799	328	0.16419
FLT4_ENSG00000037280.11	0.109823	0.845643	328	0.312022
NSUN2_ENSG00000037474.10	0.0721219	0.592169	328	0.189743
FBXO42_ENSG00000037637.6	0.051919	0.427871	328	0.15305
MFAP3_ENSG00000037749.7	0.0485528	0.387152	328	0.145096
MRI1_ENSG00000037757.9	-0.0400103	0.329681	328	0.134411
METTL1_ENSG00000037897.12	0.0778586	0.683159	328	0.217879
HOXC8_ENSG00000037965.4	0.226751	0.999701	328	0.897831
AGA_ENSG00000038002.4	0.00463991	0.114753	328	0.102246
PI4K2B_ENSG00000038210.9	0.0554391	0.447273	328	0.156029
BOD1L1_ENSG00000038219.8	0.122191	0.917086	328	0.389098
MAT2B_ENSG00000038274.12	0.0265609	0.224228	328	0.118241
TLL1_ENSG00000038295.3	-0.0514265	0.428206	328	0.153116
EDC4_ENSG00000038358.10	0.116978	0.904951	328	0.370496
TRIO_ENSG00000038382.13	-0.00371301	0.110655	328	0.101719
VCAN_ENSG00000038427.11	-0.0377696	0.256384	328	0.123024
CLEC16A_ENSG00000038532.10	-0.00145665	0.104745	328	0.100909
MSR1_ENSG00000038945.10	0.14471	0.952658	328	0.461373
CDH1_ENSG00000039068.14	-0.279684	0.999823	328	0.911801
SKIV2L2_ENSG00000039123.11	0.185385	0.996285	328	0.767093
DNAH5_ENSG00000039139.9	-0.0121422	0.14418	328	0.106262
ZFYVE16_ENSG00000039319.12	0.0918729	0.733372	328	0.237755
FAM65A_ENSG00000039523.13	-0.00818233	0.129084	328	0.104218
C6_ENSG00000039537.9	-0.0964369	0.774735	328	0.261411
RAI14_ENSG00000039560.9	0.00427411	0.112435	328	0.101857
SOX30_ENSG00000039600.6	-0.017005	0.172819	328	0.110534
PNKP_ENSG00000039650.5	-0.0591902	0.485015	328	0.16376
BEST2_ENSG00000039987.2	0.00736381	0.126914	328	0.103883
PHLPP2_ENSG00000040199.14	0.174961	0.990821	328	0.676057
SPDL1_ENSG00000040275.12	0.125616	0.917493	328	0.389098
STAU2_ENSG00000040341.13	0.0491686	0.378314	328	0.143195
PQLC2_ENSG00000040487.8	0.0600206	0.471494	328	0.161036
CTNS_ENSG00000040531.10	0.115383	0.888981	328	0.351116
RTN4R_ENSG00000040608.9	-0.0533658	0.422007	328	0.151769
PHF23_ENSG00000040633.8	0.108194	0.835344	328	0.301973
CDH10_ENSG00000040731.6	0.0654933	0.540557	328	0.176459
INPP4A_ENSG00000040933.11	0.0466866	0.342967	328	0.136734
RAB27B_ENSG00000041353.5	-0.129724	0.933131	328	0.416675
PSMA4_ENSG00000041357.11	0.0555495	0.473564	328	0.161383
MYO16_ENSG00000041515.11	0.0742411	0.653548	328	0.207912
LSG1_ENSG00000041802.6	0.00814127	0.129003	328	0.104218
PARP3_ENSG00000041880.10	-0.0547844	0.435916	328	0.15439
TNC_ENSG00000041982.10	-0.0662871	0.46618	328	0.160029
THAP3_ENSG00000041988.11	0.103228	0.837569	328	0.3042
FAM65C_ENSG00000042062.7	-0.0178045	0.169732	328	0.109996
TDP1_ENSG00000042088.9	0.105769	0.832084	328	0.299461
AIFM2_ENSG00000042286.10	-0.0632168	0.518695	328	0.170934
C2orf83_ENSG00000042304.6	0.051402	0.441908	328	0.155244
SPATA7_ENSG00000042317.12	-0.138984	0.956207	328	0.469959
MED17_ENSG00000042429.6	0.0827117	0.697425	328	0.222859
RETSAT_ENSG00000042445.9	-0.113409	0.846131	328	0.312262
CAPG_ENSG00000042493.11	-0.188906	0.996869	328	0.779053
AP2S1_ENSG00000042753.7	0.0285082	0.22695	328	0.118586
USH2A_ENSG00000042781.8	0.0692357	0.608381	328	0.19436
ZPBP_ENSG00000042813.3	-0.0492756	0.419538	328	0.151157
TG_ENSG00000042832.7	-0.00592002	0.120218	328	0.102886
ADAM28_ENSG00000042980.8	-0.0346434	0.279614	328	0.126372
BARX2_ENSG00000043039.5	-0.104307	0.794764	328	0.272096
DCUN1D1_ENSG00000043093.9	-0.00905864	0.133822	328	0.104926
PHF15_ENSG00000043143.16	0.0314474	0.258268	328	0.123187
ZIC2_ENSG00000043355.6	0.0942368	0.776192	328	0.262245
LCP2_ENSG00000043462.7	-0.0894713	0.418122	328	0.15097
TRIT1_ENSG00000043514.11	0.0852024	0.692548	328	0.220995
ADRB1_ENSG00000043591.4	-0.0896364	0.755988	328	0.2499
GUCA2B_ENSG00000044012.3	-0.0199253	0.187272	328	0.11227
CUL7_ENSG00000044090.4	0.228919	0.999658	328	0.897387
CTNNA1_ENSG00000044115.16	-0.00346425	0.110994	328	0.10174
PHKA2_ENSG00000044446.7	-0.0140051	0.153858	328	0.107668
CNTLN_ENSG00000044459.10	0.0671485	0.521366	328	0.171596
EPHA3_ENSG00000044524.6	-0.00581917	0.117583	328	0.102638
HSPA5_ENSG00000044574.7	0.0407805	0.311449	328	0.131515
DSG2_ENSG00000046604.8	-0.0345924	0.25482	328	0.122907
GEMIN8_ENSG00000046647.9	-0.000617603	0.101936	328	0.100319
OFD1_ENSG00000046651.10	-0.025209	0.215192	328	0.116845
GPM6B_ENSG00000046653.10	-0.0195465	0.173031	328	0.110568
MAGEC2_ENSG00000046774.9	-0.0228717	0.196164	328	0.113857
PREX2_ENSG00000046889.14	-0.024896	0.209213	328	0.115873
WDR37_ENSG00000047056.10	0.103505	0.83129	328	0.298817
YTHDC2_ENSG00000047188.11	0.0988219	0.813646	328	0.285297
CTPS2_ENSG00000047230.10	-0.0341948	0.260217	328	0.123394
ATP6V1H_ENSG00000047249.12	0.0116888	0.14417	328	0.106262
POLR2B_ENSG00000047315.10	0.13108	0.945379	328	0.440769
FAM214A_ENSG00000047346.8	-0.0303799	0.229041	328	0.11895
ARAP2_ENSG00000047365.7	-0.0922462	0.728445	328	0.235442
TPR_ENSG00000047410.9	0.0799545	0.67872	328	0.216384
CP_ENSG00000047457.9	-0.098355	0.762901	328	0.254185
KIAA0556_ENSG00000047578.8	-0.00822075	0.12941	328	0.104259
DTNBP1_ENSG00000047579.15	0.0594851	0.485149	328	0.163777
XK_ENSG00000047597.5	0.0100245	0.132593	328	0.10469
ANO2_ENSG00000047617.10	-0.0577087	0.487555	328	0.164277
C12orf4_ENSG00000047621.7	0.115194	0.903931	328	0.369416
SCML1_ENSG00000047634.10	-0.0429511	0.318122	328	0.132675
WWC3_ENSG00000047644.13	0.0776687	0.617619	328	0.19672
ARHGAP6_ENSG00000047648.17	-0.0797183	0.631809	328	0.200732
FAM184B_ENSG00000047662.4	0.00191614	0.106108	328	0.101012
MAP4_ENSG00000047849.17	0.150242	0.955058	328	0.466791
GOPC_ENSG00000047932.9	0.125072	0.911439	328	0.3799
ROS1_ENSG00000047936.6	-0.0310664	0.252148	328	0.122646
USP28_ENSG00000048028.7	0.117463	0.891761	328	0.354821
HDAC9_ENSG00000048052.17	-0.0477742	0.36998	328	0.141786
TSPAN17_ENSG00000048140.13	0.0844613	0.661864	328	0.210122
NOP16_ENSG00000048162.15	0.138474	0.962823	328	0.492782
CC2D2A_ENSG00000048342.11	0.00502831	0.114761	328	0.102246
RRM2B_ENSG00000048392.7	0.0624371	0.51297	328	0.169482
ZNF800_ENSG00000048405.5	0.0935817	0.736091	328	0.239067
TNFRSF17_ENSG00000048462.6	0.436153	0.98615	328	0.6239
SNX29_ENSG00000048471.9	0.0190515	0.170509	328	0.11015
LMO3_ENSG00000048540.10	-0.0201774	0.182124	328	0.111727
MRPS10_ENSG00000048544.5	0.11828	0.925022	328	0.40261
GUCA1A_ENSG00000048545.9	-0.0158749	0.166808	328	0.109629
RSF1_ENSG00000048649.9	0.0333459	0.266932	328	0.124689
VPS13D_ENSG00000048707.9	0.0189505	0.178393	328	0.11133
CELF2_ENSG00000048740.13	-0.04456	0.317325	328	0.132626
FAM120A_ENSG00000048828.12	0.0207773	0.192325	328	0.113075
R3HDM1_ENSG00000048991.12	0.169177	0.989326	328	0.655041
COL9A2_ENSG00000049089.9	-0.00857328	0.129398	328	0.104258
KITLG_ENSG00000049130.9	-0.136077	0.93868	328	0.428042
ERCC8_ENSG00000049167.9	0.0622639	0.504772	328	0.167795
ADAMTS6_ENSG00000049192.10	0.216479	0.999174	328	0.860187
H6PD_ENSG00000049239.8	0.0943573	0.778808	328	0.264262
VAMP3_ENSG00000049245.8	0.0126706	0.14511	328	0.106447
PER3_ENSG00000049246.10	0.111716	0.867972	328	0.32996
UTS2_ENSG00000049247.9	0.100344	0.829098	328	0.297274
TNFRSF9_ENSG00000049249.4	0.0201683	0.178682	328	0.111358
EPN3_ENSG00000049283.13	-0.233532	0.996333	328	0.768851
SRD5A2_ENSG00000049319.2	-0.0120106	0.146055	328	0.106603
LTBP1_ENSG00000049323.11	0.0863262	0.704553	328	0.225708
RCN1_ENSG00000049449.4	0.0408423	0.315425	328	0.132275
ELN_ENSG00000049540.12	0.0141998	0.157783	328	0.108245
RFC2_ENSG00000049541.6	0.0298742	0.243961	328	0.120999
ARID1B_ENSG00000049618.17	0.155307	0.980111	328	0.576615
CLPTM1L_ENSG00000049656.9	0.0918914	0.726281	328	0.234486
NEDD4L_ENSG00000049759.12	-0.0793773	0.609702	328	0.194637
FOXP3_ENSG00000049768.10	0.0153979	0.158948	328	0.108298
PPP1R3F_ENSG00000049769.8	-0.0838033	0.684886	328	0.21827
HEXB_ENSG00000049860.9	-0.0317871	0.241589	328	0.120548
PTCD2_ENSG00000049883.10	0.126238	0.934594	328	0.419801
KIAA2022_ENSG00000050030.9	-0.00348638	0.11112	328	0.10174
JKAMP_ENSG00000050130.13	-0.0542763	0.412503	328	0.149941
DKK3_ENSG00000050165.13	-0.0768999	0.506717	328	0.168432
ARHGEF5_ENSG00000050327.10	-0.232626	0.998397	328	0.825659
NFE2L3_ENSG00000050344.8	-0.00471116	0.115317	328	0.102317
MCUR1_ENSG00000050393.7	0.0625994	0.520445	328	0.171348
LIMA1_ENSG00000050405.9	-0.0292171	0.229575	328	0.11908
LETMD1_ENSG00000050426.11	0.100086	0.795329	328	0.272656
SLC4A8_ENSG00000050438.12	0.0811852	0.605736	328	0.193603
LAMC3_ENSG00000050555.13	0.152337	0.975598	328	0.546487
PTGER3_ENSG00000050628.16	0.00761598	0.126293	328	0.103776
TNIP3_ENSG00000050730.11	0.0616797	0.515374	328	0.170091
MAPK9_ENSG00000050748.13	0.152496	0.975116	328	0.543437
COL23A1_ENSG00000050767.11	-0.0512835	0.343757	328	0.136998
BCAR1_ENSG00000050820.12	0.0173308	0.149801	328	0.107046
FAM160A2_ENSG00000051009.6	0.00412896	0.11358	328	0.102065
HERPUD1_ENSG00000051108.10	0.0275423	0.227109	328	0.11862
HOMER3_ENSG00000051128.14	-0.130858	0.923717	328	0.399325
RAD51_ENSG00000051180.12	0.115576	0.905235	328	0.3707
POLQ_ENSG00000051341.9	-0.0124772	0.14755	328	0.106789
PIK3CB_ENSG00000051382.4	-0.0403323	0.313625	328	0.131848
CYBA_ENSG00000051523.6	-0.0665697	0.50079	328	0.167121
THOC3_ENSG00000051596.5	0.0297243	0.237818	328	0.120042
HEBP2_ENSG00000051620.6	0.0218686	0.187036	328	0.11227
MPHOSPH9_ENSG00000051825.10	0.147879	0.961972	328	0.489034
PLEKHA5_ENSG00000052126.10	0.0690573	0.557661	328	0.180357
PRSS8_ENSG00000052344.11	-0.253798	0.9995	328	0.880465
SIKE1_ENSG00000052723.7	0.0400409	0.325823	328	0.133864
RRP12_ENSG00000052749.9	0.158041	0.988611	328	0.64643
FNIP2_ENSG00000052795.8	0.0650131	0.541444	328	0.176527
MSMO1_ENSG00000052802.8	-0.0659941	0.567291	328	0.182772
TTC17_ENSG00000052841.10	0.0330449	0.271705	328	0.125167
ALX4_ENSG00000052850.5	0.0502468	0.409606	328	0.149501
FSTL4_ENSG00000053108.12	-0.0610843	0.484833	328	0.163745
FOXN3_ENSG00000053254.11	0.0503005	0.394717	328	0.146784
METTL24_ENSG00000053328.8	0.0495687	0.406126	328	0.148824
AKR7A2_ENSG00000053371.8	0.0276404	0.229299	328	0.119037
MRTO4_ENSG00000053372.4	0.156269	0.986479	328	0.627998
NNAT_ENSG00000053438.7	-0.113759	0.891677	328	0.354821
USE1_ENSG00000053501.8	-0.0614145	0.483023	328	0.163338
MCF2L2_ENSG00000053524.7	-0.0076876	0.124855	328	0.103604
NRIP2_ENSG00000053702.10	0.0835792	0.699221	328	0.223384
LAMA3_ENSG00000053747.11	-0.300455	0.999993	328	0.977738
AP5M1_ENSG00000053770.7	-0.0747898	0.594201	328	0.189748
ANAPC4_ENSG00000053900.6	0.178759	0.992472	328	0.693618
KCNQ1_ENSG00000053918.11	-0.0860239	0.635381	328	0.202012
TRAPPC3_ENSG00000054116.7	0.0463517	0.381566	328	0.143917
THRAP3_ENSG00000054118.9	0.13383	0.953386	328	0.462367
PHPT1_ENSG00000054148.13	-0.000598156	0.10189	328	0.100319
ENTPD2_ENSG00000054179.7	-0.113507	0.799368	328	0.275358
LY75_ENSG00000054219.9	-0.22127	0.998745	328	0.842138
ARID4B_ENSG00000054267.16	-0.0170634	0.167489	328	0.109693
OPN3_ENSG00000054277.8	-0.154642	0.983684	328	0.604814
SDCCAG8_ENSG00000054282.11	0.110785	0.873034	328	0.335283
PTPRN_ENSG00000054356.9	0.0502114	0.353741	328	0.138915
HHAT_ENSG00000054392.8	-0.112292	0.844912	328	0.311172
KIF1B_ENSG00000054523.12	0.169873	0.98423	328	0.607619
FOXC1_ENSG00000054598.5	-0.0748629	0.632792	328	0.200826
TBC1D22A_ENSG00000054611.9	-0.0332949	0.269647	328	0.124895
SYNE2_ENSG00000054654.11	-0.103669	0.779028	328	0.264262
PLEKHH1_ENSG00000054690.9	-0.104897	0.773725	328	0.261177
ATP9A_ENSG00000054793.9	-0.0513444	0.374476	328	0.142525
SPO11_ENSG00000054796.8	0.0116428	0.146817	328	0.106737
CBLN4_ENSG00000054803.3	-0.0527322	0.457126	328	0.158161
CHRDL2_ENSG00000054938.11	-0.0605944	0.523527	328	0.171955
FAM168A_ENSG00000054965.6	0.088848	0.718002	328	0.230891
RELT_ENSG00000054967.8	-3.58511e-05	0.100108	328	0.10002
GALC_ENSG00000054983.12	-0.0233532	0.200488	328	0.114251
NOP58_ENSG00000055044.6	0.0662291	0.532817	328	0.174135
SZRD1_ENSG00000055070.12	0.113985	0.884621	328	0.346528
KCNH2_ENSG00000055118.10	0.0276149	0.216325	328	0.117011
CUL1_ENSG00000055130.11	0.138655	0.943849	328	0.436463
FAM114A2_ENSG00000055147.13	0.192528	0.997508	328	0.795593
CYFIP2_ENSG00000055163.14	0.00182133	0.105618	328	0.101007
TAB2_ENSG00000055208.13	0.0938227	0.774447	328	0.261403
GINM1_ENSG00000055211.8	0.0899002	0.73692	328	0.239359
EIF2AK2_ENSG00000055332.12	-0.104795	0.836426	328	0.303044
USP36_ENSG00000055483.15	0.0239329	0.204147	328	0.114991
KMT2C_ENSG00000055609.13	0.0337902	0.266492	328	0.124614
MCOLN3_ENSG00000055732.8	-0.0859922	0.679892	328	0.216704
CCDC85A_ENSG00000055813.5	-0.0129747	0.149723	328	0.107046
PUM2_ENSG00000055917.11	0.0971686	0.773	328	0.260631
MRPL43_ENSG00000055950.12	0.0548985	0.444861	328	0.155643
ITIH4_ENSG00000055955.11	0.0275471	0.225983	328	0.118435
ITIH1_ENSG00000055957.6	0.0605479	0.490831	328	0.164703
C4orf27_ENSG00000056050.6	0.0682952	0.57984	328	0.185978
ZFR_ENSG00000056097.11	0.0770167	0.593865	328	0.189743
ZNF280C_ENSG00000056277.11	0.107248	0.830015	328	0.298328
NPFFR2_ENSG00000056291.13	0.116959	0.899599	328	0.362561
PHF21B_ENSG00000056487.11	0.113997	0.85358	328	0.318779
TRAF1_ENSG00000056558.6	-0.0888113	0.705171	328	0.225961
RC3H2_ENSG00000056586.11	-0.0216755	0.193001	328	0.113214
PCGF2_ENSG00000056661.9	0.0893994	0.618308	328	0.19672
IL17RB_ENSG00000056736.5	0.0110519	0.135428	328	0.105102
TRAF3IP2_ENSG00000056972.14	-0.146645	0.967661	328	0.511308
GYG2_ENSG00000056998.14	-0.00841132	0.12789	328	0.103986
DCBLD2_ENSG00000057019.11	-0.0693777	0.499243	328	0.166807
SERPINB3_ENSG00000057149.10	-0.0918896	0.753177	328	0.248559
SOAT1_ENSG00000057252.8	0.0745472	0.572633	328	0.184273
PKP2_ENSG00000057294.9	-0.162362	0.951692	328	0.458522
MSH4_ENSG00000057468.6	0.0286247	0.242344	328	0.120633
F7_ENSG00000057593.9	-0.00418077	0.113269	328	0.102011
GDI2_ENSG00000057608.12	0.187705	0.997125	328	0.784257
PRDM1_ENSG00000057657.10	0.0390547	0.256685	328	0.123024
ATG5_ENSG00000057663.8	0.118311	0.919952	328	0.392272
TMCC3_ENSG00000057704.6	-0.0413351	0.336536	328	0.135874
PITHD1_ENSG00000057757.5	0.0308351	0.247099	328	0.121465
MTA3_ENSG00000057935.9	0.116446	0.837555	328	0.3042
USP13_ENSG00000058056.4	0.0931637	0.76286	328	0.254185
ATP11B_ENSG00000058063.11	0.0808458	0.671142	328	0.213917
LAMC2_ENSG00000058085.10	-0.201478	0.993627	328	0.711243
CDK14_ENSG00000058091.12	0.0521788	0.401948	328	0.148069
SEC61A1_ENSG00000058262.5	0.0739106	0.594198	328	0.189748
PPP1R12A_ENSG00000058272.11	0.0635647	0.511362	328	0.169223
RASGRF1_ENSG00000058335.11	-0.136054	0.948576	328	0.448806
CAMK2B_ENSG00000058404.15	0.0432367	0.334041	328	0.135283
CROCC_ENSG00000058453.12	0.152967	0.983301	328	0.601763
POLR3E_ENSG00000058600.11	0.0967947	0.790488	328	0.269573
ATP2B4_ENSG00000058668.10	-0.0647181	0.518099	328	0.17079
ZC3H11A_ENSG00000058673.11	0.0400595	0.321964	328	0.133098
RIOK2_ENSG00000058729.6	0.0893507	0.769582	328	0.258752
YIPF1_ENSG00000058799.9	-0.0553923	0.450194	328	0.156395
NDC1_ENSG00000058804.10	0.144235	0.971997	328	0.53239
DGKG_ENSG00000058866.10	-0.0340147	0.25431	328	0.122907
FLYWCH1_ENSG00000059122.12	0.0579834	0.467521	328	0.160238
UNKL_ENSG00000059145.14	0.122634	0.914452	328	0.384983
TBXAS1_ENSG00000059377.11	-0.0419321	0.322844	328	0.133234
PARP12_ENSG00000059378.8	-0.119371	0.911029	328	0.379642
ALDH18A1_ENSG00000059573.4	0.135846	0.942491	328	0.433969
TARBP1_ENSG00000059588.5	0.0342925	0.2725	328	0.12538
PET112_ENSG00000059691.7	0.0809466	0.693287	328	0.221421
MXD1_ENSG00000059728.6	-0.156701	0.975291	328	0.544291
CDK17_ENSG00000059758.3	0.111948	0.87783	328	0.340809
DNAJC25_ENSG00000059769.15	0.0119656	0.145569	328	0.106473
SLC2A3_ENSG00000059804.11	0.0604746	0.480249	328	0.162662
PSD_ENSG00000059915.12	0.0740951	0.583461	328	0.186724
CTDP1_ENSG00000060069.12	0.125841	0.921187	328	0.394701
YBX3_ENSG00000060138.8	0.0163036	0.165156	328	0.109359
STYK1_ENSG00000060140.4	-0.121985	0.897769	328	0.35942
WNK1_ENSG00000060237.12	0.20215	0.998776	328	0.843675
RPS17P5_ENSG00000060303.5	-0.0663712	0.572373	328	0.184139
CCAR1_ENSG00000060339.9	0.147857	0.974984	328	0.542921
OGFR_ENSG00000060491.12	-0.0884548	0.733118	328	0.237718
GNA15_ENSG00000060558.3	-0.175215	0.980044	328	0.575723
CREB3L3_ENSG00000060566.9	0.0745235	0.602029	328	0.192568
PIGV_ENSG00000060642.6	-0.0788929	0.675213	328	0.215068
PTPRU_ENSG00000060656.15	-0.130682	0.92856	328	0.409413
SNRNP40_ENSG00000060688.8	0.158101	0.98053	328	0.578318
RIMBP2_ENSG00000060709.9	-0.0292875	0.226794	328	0.118559
COL11A1_ENSG00000060718.14	0.141736	0.953658	328	0.462866
QSER1_ENSG00000060749.10	0.160341	0.985451	328	0.618775
MPC1_ENSG00000060762.14	0.0861632	0.725171	328	0.234001
ACAA1_ENSG00000060971.13	-0.116919	0.849469	328	0.315633
BCAT1_ENSG00000060982.10	0.0927394	0.731922	328	0.237065
HDAC7_ENSG00000061273.13	0.0147292	0.155913	328	0.107998
LZTS1_ENSG00000061337.11	-0.0573032	0.386893	328	0.144934
PRDM6_ENSG00000061455.10	0.0533181	0.439751	328	0.154904
WNT8A_ENSG00000061492.7	-0.115639	0.899329	328	0.362423
SPAG4_ENSG00000061656.5	-0.0271099	0.228303	328	0.118834
NCKAP1_ENSG00000061676.10	0.134125	0.65578	328	0.208499
MRPS35_ENSG00000061794.8	0.0643016	0.518641	328	0.170934
GUCY1B3_ENSG00000061918.8	0.116862	0.872011	328	0.334451
SFSWAP_ENSG00000061936.5	0.0906801	0.757943	328	0.251286
TNK2_ENSG00000061938.12	-0.00593639	0.119528	328	0.102756
MON2_ENSG00000061987.10	0.095527	0.803371	328	0.278206
CDH3_ENSG00000062038.9	-0.26962	0.999827	328	0.912395
ARSF_ENSG00000062096.10	-0.0195604	0.185807	328	0.112131
GPBP1_ENSG00000062194.11	0.0605427	0.488841	328	0.164294
DGAT2_ENSG00000062282.10	0.0251765	0.211159	328	0.116198
ZNF112_ENSG00000062370.12	-0.0554979	0.404066	328	0.148444
CS_ENSG00000062485.14	0.116894	0.903104	328	0.367827
LTK_ENSG00000062524.11	0.0176899	0.171453	328	0.110311
MRPS24_ENSG00000062582.9	-0.0277727	0.231116	328	0.119198
ELMO2_ENSG00000062598.13	0.0454677	0.357343	328	0.139403
WAPAL_ENSG00000062650.13	0.100696	0.842177	328	0.308406
VMP1_ENSG00000062716.6	-0.0893853	0.724908	328	0.233858
APPBP2_ENSG00000062725.5	0.0648146	0.525235	328	0.172416
POLD1_ENSG00000062822.8	0.0586169	0.467397	328	0.16019
SEZ6_ENSG00000063015.15	0.039182	0.285897	328	0.127677
EIF4B_ENSG00000063046.13	0.188239	0.997036	328	0.783059
SLC6A16_ENSG00000063127.11	0.0470541	0.372699	328	0.142091
GLTSCR1_ENSG00000063169.6	0.0533862	0.411328	328	0.149714
SPHK2_ENSG00000063176.11	0.0480679	0.375461	328	0.14265
RPL18_ENSG00000063177.8	0.0118099	0.143949	328	0.106262
CA11_ENSG00000063180.4	0.0364535	0.293285	328	0.128871
ISOC2_ENSG00000063241.3	0.0708858	0.603277	328	0.192808
U2AF2_ENSG00000063244.8	0.108718	0.862292	328	0.325597
EPN1_ENSG00000063245.10	-0.000980547	0.103094	328	0.100493
MED29_ENSG00000063322.9	0.0212453	0.190223	328	0.112669
AHRR_ENSG00000063438.12	-0.0155829	0.15593	328	0.107998
GSC2_ENSG00000063515.2	0.0475676	0.398176	328	0.147523
ZNF275_ENSG00000063587.12	0.0458245	0.367396	328	0.141094
MTMR1_ENSG00000063601.12	0.0203643	0.184634	328	0.112036
GPC1_ENSG00000063660.4	-0.117026	0.852176	328	0.31758
ADCK1_ENSG00000063761.11	-0.0259344	0.217744	328	0.117137
HAGH_ENSG00000063854.8	-0.0749105	0.602338	328	0.192667
RNF4_ENSG00000063978.11	0.203058	0.999161	328	0.859958
CASP8_ENSG00000064012.17	-0.126511	0.930773	328	0.413344
LIMCH1_ENSG00000064042.13	-0.049333	0.36838	328	0.141348
ASUN_ENSG00000064102.10	0.153979	0.979476	328	0.571782
TM7SF3_ENSG00000064115.6	0.0262043	0.222936	328	0.118099
DLX3_ENSG00000064195.7	-0.0246622	0.202751	328	0.114674
SPA17_ENSG00000064199.2	0.0655048	0.535952	328	0.174982
TSPAN32_ENSG00000064201.11	-0.0447255	0.268971	328	0.124841
WISP2_ENSG00000064205.6	-0.113481	0.895647	328	0.358176
DMRT3_ENSG00000064218.4	0.0136646	0.153737	328	0.10766
ST3GAL6_ENSG00000064225.8	0.0314452	0.219189	328	0.117367
ATP2C2_ENSG00000064270.8	-0.134048	0.873052	328	0.335283
NGFR_ENSG00000064300.4	-0.0508969	0.364557	328	0.140801
CDON_ENSG00000064309.10	0.0869121	0.665567	328	0.211169
TAF2_ENSG00000064313.7	0.0566331	0.47097	328	0.160972
HIPK2_ENSG00000064393.11	0.0722265	0.592173	328	0.189743
TNPO3_ENSG00000064419.9	0.0924599	0.757483	328	0.250957
None_ENSG00000064489.17	-0.076775	0.634429	328	0.201513
RFXANK_ENSG00000064490.9	0.0167817	0.166263	328	0.10952
TMEM161A_ENSG00000064545.10	0.0980703	0.791924	328	0.270568
LPAR2_ENSG00000064547.9	-0.144627	0.948909	328	0.449606
CTSA_ENSG00000064601.12	-0.0580828	0.449373	328	0.156274
SUGP2_ENSG00000064607.12	0.0809792	0.66005	328	0.209733
SLC12A2_ENSG00000064651.9	-0.0741172	0.518066	328	0.17079
SNX24_ENSG00000064652.6	0.061197	0.477475	328	0.161926
EYA2_ENSG00000064655.14	-0.0448658	0.340913	328	0.136404
CNN2_ENSG00000064666.10	-0.0362737	0.275062	328	0.125872
ABCA7_ENSG00000064687.8	-0.0280893	0.223857	328	0.118209
SNCAIP_ENSG00000064692.14	0.00869238	0.129936	328	0.104259
DDX20_ENSG00000064703.7	0.0553173	0.461191	328	0.158993
BTBD1_ENSG00000064726.5	0.0281298	0.233229	328	0.119465
FAR2_ENSG00000064763.6	0.0230488	0.1982	328	0.114047
BCAS1_ENSG00000064787.8	-0.103191	0.798475	328	0.274914
POU1F1_ENSG00000064835.6	-0.049987	0.429714	328	0.153192
CHI3L2_ENSG00000064886.9	0.01972	0.178185	328	0.111279
SBNO2_ENSG00000064932.11	-0.0813163	0.652752	328	0.207705
PMS1_ENSG00000064933.12	0.0721392	0.587542	328	0.187916
HMG20B_ENSG00000064961.14	0.0408974	0.2791	328	0.126266
CALCRL_ENSG00000064989.8	0.0261201	0.222093	328	0.117949
TAF11_ENSG00000064995.12	0.122336	0.904234	328	0.36973
ANKS1A_ENSG00000064999.12	-0.0260867	0.213231	328	0.116497
AP3D1_ENSG00000065000.11	0.117865	0.912049	328	0.380555
ZNF76_ENSG00000065029.10	0.0917952	0.749097	328	0.246526
SLC9A3R2_ENSG00000065054.9	-0.0173898	0.161732	328	0.108721
NTHL1_ENSG00000065057.3	0.0721753	0.604518	328	0.193136
UHRF1BP1_ENSG00000065060.12	0.202321	0.99826	328	0.819959
GNAI3_ENSG00000065135.7	-0.00597417	0.120038	328	0.10281
IPO5_ENSG00000065150.14	0.215595	0.999698	328	0.897831
OAT_ENSG00000065154.7	-0.0283947	0.237256	328	0.119971
WDR3_ENSG00000065183.11	0.15528	0.981703	328	0.589007
PKN2_ENSG00000065243.14	0.0784162	0.61802	328	0.19672
WDR18_ENSG00000065268.6	0.137782	0.962933	328	0.493359
TRAM2_ENSG00000065308.4	0.122718	0.876071	328	0.33895
NTN1_ENSG00000065320.4	-0.0209653	0.188494	328	0.112395
GLP2R_ENSG00000065325.8	-0.0529486	0.438712	328	0.154736
MCM10_ENSG00000065328.12	0.162548	0.989797	328	0.662083
DGKA_ENSG00000065357.15	-0.225322	0.999682	328	0.897831
ERBB3_ENSG00000065361.10	-0.215732	0.993842	328	0.715436
ROPN1_ENSG00000065371.13	-0.119306	0.688948	328	0.219946
ANKRD44_ENSG00000065413.12	-0.00503862	0.113957	328	0.10213
KARS_ENSG00000065427.10	0.0927085	0.786889	328	0.268544
ADAT1_ENSG00000065457.6	0.048022	0.362899	328	0.140416
PDIA5_ENSG00000065485.13	0.00940965	0.133578	328	0.104926
TBC1D22B_ENSG00000065491.8	0.115366	0.895375	328	0.357968
NDUFB4_ENSG00000065518.7	-0.116307	0.909489	328	0.377037
SPEN_ENSG00000065526.6	0.0691721	0.583489	328	0.186724
MYLK_ENSG00000065534.14	-0.0427777	0.293305	328	0.128873
ZC3H15_ENSG00000065548.13	0.0577215	0.471033	328	0.16101
MAP2K4_ENSG00000065559.10	0.00442682	0.114888	328	0.102287
TMEM206_ENSG00000065600.8	0.0564881	0.441163	328	0.155155
SNAP91_ENSG00000065609.10	0.0151377	0.155549	328	0.107974
SLK_ENSG00000065613.9	0.0356239	0.282421	328	0.127039
CYB5R4_ENSG00000065615.9	0.0861344	0.711458	328	0.228004
COL17A1_ENSG00000065618.12	-0.163412	0.950764	328	0.45574
GSTO2_ENSG00000065621.10	-0.062633	0.44693	328	0.155906
SEC61A2_ENSG00000065665.16	0.177336	0.99345	328	0.708044
PRKCQ_ENSG00000065675.10	0.037361	0.301834	328	0.130244
TLE2_ENSG00000065717.10	0.0512872	0.360312	328	0.140139
ASB1_ENSG00000065802.7	0.0436345	0.3229	328	0.133234
FAM107B_ENSG00000065809.9	-0.141008	0.961004	328	0.48514
ME1_ENSG00000065833.7	-0.0196573	0.182908	328	0.11185
TBC1D1_ENSG00000065882.11	0.103901	0.838445	328	0.305161
CDK13_ENSG00000065883.10	-0.00200636	0.106526	328	0.101083
MTHFD2_ENSG00000065911.7	-0.00371493	0.111675	328	0.10174
SLC9A7_ENSG00000065923.5	-0.0140517	0.153494	328	0.107578
FOXJ2_ENSG00000065970.4	0.159811	0.988797	328	0.647922
YBX1_ENSG00000065978.13	0.124228	0.91637	328	0.387642
PDE4A_ENSG00000065989.11	0.137924	0.947715	328	0.4464
PPP2R5A_ENSG00000066027.7	0.0550098	0.420649	328	0.151303
CTNNA2_ENSG00000066032.14	0.103065	0.828232	328	0.296662
ELAVL1_ENSG00000066044.9	0.145082	0.970949	328	0.528603
TIE1_ENSG00000066056.9	0.0692656	0.569809	328	0.183389
DIP2B_ENSG00000066084.8	0.107514	0.847522	328	0.313326
SMARCD1_ENSG00000066117.10	0.165202	0.985344	328	0.617174
KDM4A_ENSG00000066135.8	0.122961	0.921071	328	0.394701
NFYC_ENSG00000066136.15	0.144515	0.963985	328	0.497141
ZMYND12_ENSG00000066185.8	-0.086118	0.731533	328	0.236825
SLC9A3_ENSG00000066230.6	0.0179407	0.177327	328	0.111144
NGEF_ENSG00000066248.10	-0.17407	0.990492	328	0.671452
ASPM_ENSG00000066279.12	0.0936633	0.784642	328	0.266849
CD84_ENSG00000066294.10	0.0523412	0.270527	328	0.124957
ELOVL1_ENSG00000066322.8	0.0267194	0.219497	328	0.117422
SPI1_ENSG00000066336.7	-0.110869	0.39908	328	0.147703
ZNRD1_ENSG00000066379.10	0.0874963	0.724556	328	0.233757
MPPED2_ENSG00000066382.12	0.0786919	0.659901	328	0.209733
CLDN18_ENSG00000066405.8	-0.0616829	0.532864	328	0.174135
ZBTB11_ENSG00000066422.4	0.0365577	0.288209	328	0.128091
ATXN3_ENSG00000066427.17	-0.0548972	0.437249	328	0.154563
GOLGA5_ENSG00000066455.8	-0.129704	0.932842	328	0.41665
FGFR2_ENSG00000066468.16	-0.0557612	0.406821	328	0.149012
LRRC40_ENSG00000066557.5	0.0852875	0.705759	328	0.22621
ISOC1_ENSG00000066583.7	0.133596	0.903971	328	0.369416
EML1_ENSG00000066629.12	0.137096	0.917171	328	0.389098
TRMT11_ENSG00000066651.13	0.0966795	0.766959	328	0.256943
THUMPD1_ENSG00000066654.8	0.0560191	0.452881	328	0.157175
MSANTD3_ENSG00000066697.10	0.147454	0.930468	328	0.412453
KIF26A_ENSG00000066735.10	0.108856	0.846263	328	0.312402
ATG2B_ENSG00000066739.7	0.0181439	0.173707	328	0.110688
ARFGEF1_ENSG00000066777.4	-0.00780127	0.128251	328	0.104017
ACSM2B_ENSG00000066813.10	0.121802	0.91204	328	0.380555
ZFAT_ENSG00000066827.11	0.0251143	0.2109	328	0.116156
MTFR1_ENSG00000066855.11	0.127581	0.937426	328	0.425952
STAG3_ENSG00000066923.13	-0.00817926	0.128997	328	0.104218
FECH_ENSG00000066926.6	0.182052	0.992734	328	0.696994
MYO9A_ENSG00000066933.11	0.0583569	0.486824	328	0.16419
DDX3Y_ENSG00000067048.12	0.0954117	0.7577	328	0.251087
PFKP_ENSG00000067057.12	-0.00812585	0.129184	328	0.104218
IDI1_ENSG00000067064.6	0.0786915	0.647386	328	0.205919
SP100_ENSG00000067066.12	-0.157293	0.975039	328	0.542921
KLF6_ENSG00000067082.10	0.0157076	0.159824	328	0.108351
PPAP2A_ENSG00000067113.12	0.0899251	0.716592	328	0.230253
NEO1_ENSG00000067141.12	0.066491	0.556026	328	0.180039
TRAM1_ENSG00000067167.3	-0.0138249	0.152699	328	0.107457
PHKA1_ENSG00000067177.10	0.063905	0.494581	328	0.16565
TNFRSF1A_ENSG00000067182.3	0.00265493	0.108019	328	0.101314
CACNB1_ENSG00000067191.11	0.024516	0.214214	328	0.116679
EVI5_ENSG00000067208.10	0.0996766	0.753145	328	0.248559
STOML1_ENSG00000067221.9	-0.122922	0.890123	328	0.352913
PKM_ENSG00000067225.13	-0.0948843	0.739777	328	0.241149
DHX29_ENSG00000067248.5	0.121977	0.926139	328	0.404905
DNTTIP2_ENSG00000067334.9	-0.00901241	0.132741	328	0.104716
METTL22_ENSG00000067365.10	-0.0149086	0.158916	328	0.108298
TP53BP1_ENSG00000067369.9	0.140972	0.954306	328	0.464418
TRO_ENSG00000067445.16	-0.00764646	0.124286	328	0.103477
RRP15_ENSG00000067533.5	0.0128487	0.148896	328	0.106972
RHOA_ENSG00000067560.6	0.135653	0.943722	328	0.436463
DHX8_ENSG00000067596.6	0.0286171	0.234311	328	0.119511
PMS2P4_ENSG00000067601.6	0.0119896	0.143704	328	0.106257
PRKCZ_ENSG00000067606.11	-0.193669	0.991161	328	0.680373
ZFY_ENSG00000067646.7	0.101602	0.796412	328	0.273378
IARS2_ENSG00000067704.8	0.107234	0.863744	328	0.327193
SYT1_ENSG00000067715.9	-0.0530721	0.379675	328	0.143439
NAV3_ENSG00000067798.9	0.0520637	0.38943	328	0.145552
IDH3G_ENSG00000067829.14	-0.0256794	0.220272	328	0.11763
ROGDI_ENSG00000067836.8	-0.0569721	0.43001	328	0.153272
PDZD4_ENSG00000067840.8	0.0604354	0.472176	328	0.161264
ATP2B3_ENSG00000067842.13	0.0416821	0.32673	328	0.133981
ROCK1_ENSG00000067900.6	0.165814	0.990443	328	0.671452
CBFB_ENSG00000067955.9	0.101449	0.838429	328	0.305161
PDK3_ENSG00000067992.8	-0.0671686	0.55539	328	0.179915
HYAL2_ENSG00000068001.9	0.081142	0.627175	328	0.19901
HDAC4_ENSG00000068024.12	0.0159422	0.162166	328	0.108826
RASSF1_ENSG00000068028.13	0.038619	0.289074	328	0.128243
FGFR3_ENSG00000068078.13	0.139753	0.944856	328	0.439073
IFI35_ENSG00000068079.3	-0.110748	0.866992	328	0.32962
HEATR6_ENSG00000068097.10	0.0926447	0.749245	328	0.246555
COASY_ENSG00000068120.10	0.0105738	0.138904	328	0.105486
PLEKHH3_ENSG00000068137.10	0.0967979	0.751701	328	0.248112
MEF2A_ENSG00000068305.13	0.0978461	0.810263	328	0.282015
OTUD5_ENSG00000068308.9	-0.00477158	0.115475	328	0.102348
TFE3_ENSG00000068323.12	0.0464607	0.35527	328	0.139172
TBC1D25_ENSG00000068354.11	0.00874952	0.130117	328	0.104315
ACSL4_ENSG00000068366.15	-0.0220632	0.179566	328	0.111412
INPP5A_ENSG00000068383.14	0.0230788	0.193369	328	0.11326
GPKOW_ENSG00000068394.9	-0.0121186	0.146464	328	0.106659
GRIPAP1_ENSG00000068400.9	-0.0445533	0.353211	328	0.138862
FTSJ1_ENSG00000068438.10	-0.0333161	0.270202	328	0.124908
PRR11_ENSG00000068489.8	0.146182	0.963104	328	0.493777
REEP1_ENSG00000068615.12	-0.00490244	0.115863	328	0.102468
ATP11A_ENSG00000068650.14	0.034039	0.267653	328	0.124762
POLR1A_ENSG00000068654.11	0.153377	0.982195	328	0.592297
LAPTM4A_ENSG00000068697.6	-0.11216	0.810156	328	0.282011
TTC7A_ENSG00000068724.11	-0.138673	0.955263	328	0.467219
IP6K2_ENSG00000068745.10	0.0403657	0.319397	328	0.13268
STON1-GTF2A1L_ENSG00000068781.16	0.0873328	0.733853	328	0.238046
SRBD1_ENSG00000068784.8	0.0725205	0.614082	328	0.196043
CYFIP1_ENSG00000068793.13	0.0488009	0.352007	328	0.138759
KIF2A_ENSG00000068796.12	0.177689	0.992664	328	0.69605
RASGRP2_ENSG00000068831.14	0.0457365	0.305101	328	0.13068
PSME4_ENSG00000068878.10	0.0177023	0.175864	328	0.110926
IFT80_ENSG00000068885.10	-0.0409397	0.327465	328	0.134143
SIRT2_ENSG00000068903.15	0.0115105	0.142902	328	0.106083
ERLEC1_ENSG00000068912.9	-0.0298092	0.235167	328	0.119685
PPP2R5B_ENSG00000068971.9	-0.0469292	0.375175	328	0.142575
PYGM_ENSG00000068976.9	0.00683649	0.124532	328	0.103562
PAGE1_ENSG00000068985.4	-0.0588819	0.496413	328	0.165982
PITX1_ENSG00000069011.11	0.0907552	0.662563	328	0.210368
TRPC7_ENSG00000069018.13	0.0196888	0.187587	328	0.112278
MAST4_ENSG00000069020.14	-0.0636539	0.519165	328	0.171007
GPR116_ENSG00000069122.14	-0.0706784	0.609793	328	0.194637
SDK2_ENSG00000069188.12	0.00165985	0.105101	328	0.100959
ADAM7_ENSG00000069206.11	0.0607711	0.518161	328	0.17079
NUP133_ENSG00000069248.9	0.089937	0.756646	328	0.25037
NUCKS1_ENSG00000069275.12	0.038451	0.301675	328	0.130244
VPS35_ENSG00000069329.11	0.0535862	0.453482	328	0.157275
DNAJA2_ENSG00000069345.7	0.0621952	0.539834	328	0.176134
BCL3_ENSG00000069399.8	-0.0353888	0.274491	328	0.125726
KCNAB2_ENSG00000069424.10	-0.0723189	0.517388	328	0.170601
ABCC9_ENSG00000069431.6	0.0133497	0.151444	328	0.107351
GAL_ENSG00000069482.6	-0.0387586	0.299647	328	0.129826
CLEC2D_ENSG00000069493.10	0.0147277	0.153075	328	0.107512
FUNDC1_ENSG00000069509.5	-0.0616544	0.51808	328	0.17079
MAOB_ENSG00000069535.12	-0.108447	0.859136	328	0.322623
RORA_ENSG00000069667.11	0.0353728	0.273966	328	0.12556
DRD4_ENSG00000069696.6	-0.0801231	0.70945	328	0.227247
TGFBR3_ENSG00000069702.6	-0.0324295	0.258089	328	0.123181
KIAA1107_ENSG00000069712.9	-0.0270773	0.226141	328	0.118435
PLA2G10_ENSG00000069764.5	-0.104322	0.818002	328	0.288334
HES2_ENSG00000069812.7	-0.113919	0.846704	328	0.312962
ATP1B3_ENSG00000069849.6	-0.0192137	0.175337	328	0.110865
NEDD4_ENSG00000069869.11	0.0939232	0.765137	328	0.255425
PIGB_ENSG00000069943.5	-0.0177962	0.171861	328	0.110361
MAPK6_ENSG00000069956.7	0.148474	0.971333	328	0.529725
GNB5_ENSG00000069966.14	0.0631096	0.469965	328	0.160723
RAB27A_ENSG00000069974.11	-0.0852453	0.65412	328	0.2082
CECR5_ENSG00000069998.8	0.069852	0.589024	328	0.188343
UFD1L_ENSG00000070010.14	0.023665	0.209083	328	0.115873
LRP6_ENSG00000070018.4	0.16201	0.970844	328	0.528423
GUCY2C_ENSG00000070019.3	-0.05041	0.366803	328	0.141092
SCT_ENSG00000070031.3	-0.075291	0.656136	328	0.208542
PHRF1_ENSG00000070047.7	0.0863674	0.740267	328	0.241451
IKBKAP_ENSG00000070061.10	0.0681743	0.57026	328	0.18352
NUCB2_ENSG00000070081.11	0.0263729	0.216038	328	0.116968
PFN2_ENSG00000070087.9	0.192085	0.970482	328	0.526461
PTPN3_ENSG00000070159.9	-0.195673	0.996764	328	0.776198
SPTB_ENSG00000070182.13	0.0128246	0.144995	328	0.106404
DAPP1_ENSG00000070190.8	-0.260465	0.99985	328	0.916054
FGF10_ENSG00000070193.4	0.0568374	0.494667	328	0.165658
SLC44A1_ENSG00000070214.11	-0.0577524	0.462104	328	0.159043
TMEM260_ENSG00000070269.9	-0.0892945	0.745349	328	0.244177
SMG6_ENSG00000070366.9	0.19218	0.996752	328	0.776198
EXOC5_ENSG00000070367.11	0.0636521	0.489271	328	0.164294
CLTCL1_ENSG00000070371.11	0.142509	0.95393	328	0.463735
FGF22_ENSG00000070388.7	0.0367839	0.29566	328	0.129094
FSTL3_ENSG00000070404.5	-0.0555714	0.425162	328	0.152528
DGCR2_ENSG00000070413.14	0.0198536	0.185885	328	0.112142
RNF126_ENSG00000070423.13	0.0863022	0.71218	328	0.228248
MNT_ENSG00000070444.10	0.0544177	0.436764	328	0.154396
ZXDC_ENSG00000070476.10	0.0132348	0.150419	328	0.107155
JMJD6_ENSG00000070495.10	0.0298545	0.242975	328	0.120788
POLB_ENSG00000070501.7	-0.0584741	0.485501	328	0.163818
ST6GALNAC1_ENSG00000070526.10	-0.133481	0.929219	328	0.410398
WIPI1_ENSG00000070540.8	-0.0230349	0.184878	328	0.112036
FRMPD1_ENSG00000070601.5	-0.0409113	0.316974	328	0.132626
GBA2_ENSG00000070610.10	0.00281587	0.109136	328	0.101467
NDST1_ENSG00000070614.10	0.162424	0.966002	328	0.505423
ASNS_ENSG00000070669.12	0.144695	0.972979	328	0.53239
AP3M2_ENSG00000070718.7	0.0385606	0.306722	328	0.130961
CNGB1_ENSG00000070729.9	0.00448522	0.115225	328	0.102317
ST6GALNAC2_ENSG00000070731.5	-0.219174	0.998262	328	0.819959
CHAT_ENSG00000070748.13	0.0517989	0.440265	328	0.15496
PABPC1_ENSG00000070756.9	0.0710647	0.586361	328	0.187543
TESK2_ENSG00000070759.12	-0.025585	0.213064	328	0.116497
C16orf80_ENSG00000070761.3	0.116085	0.896359	328	0.358622
CSNK2A2_ENSG00000070770.4	0.150548	0.980938	328	0.581714
PTPN21_ENSG00000070778.8	0.0684804	0.523083	328	0.171822
EIF2B3_ENSG00000070785.12	0.135469	0.942479	328	0.433969
CAMK2A_ENSG00000070808.11	-0.000885665	0.102857	328	0.100414
TCOF1_ENSG00000070814.13	0.110878	0.892691	328	0.354821
CDC42_ENSG00000070831.11	0.0855616	0.73181	328	0.237052
OSBPL3_ENSG00000070882.8	-0.108046	0.841739	328	0.307974
EPHA8_ENSG00000070886.6	0.0470268	0.383777	328	0.144408
SLC12A3_ENSG00000070915.5	0.0392776	0.32365	328	0.133384
RAD18_ENSG00000070950.5	0.0623713	0.52604	328	0.172662
ATP2B1_ENSG00000070961.10	0.0357273	0.28101	328	0.126595
TRPM5_ENSG00000070985.9	-0.0569585	0.48796	328	0.164288
NCK2_ENSG00000071051.9	-0.0831924	0.677484	328	0.216025
MAP4K4_ENSG00000071054.11	0.045898	0.342455	328	0.136642
MGAT4A_ENSG00000071073.8	-0.0939903	0.714642	328	0.229518
RPL31_ENSG00000071082.6	-0.0378002	0.300682	328	0.130138
WDR1_ENSG00000071127.12	0.0444516	0.351564	328	0.138686
SNX13_ENSG00000071189.17	0.0386723	0.286157	328	0.127677
MS4A12_ENSG00000071203.5	0.130235	0.945588	328	0.441628
ARHGAP10_ENSG00000071205.7	0.10023	0.827034	328	0.29558
RPS6KA2_ENSG00000071242.7	-0.111108	0.88148	328	0.344
ING3_ENSG00000071243.11	0.0317365	0.24754	328	0.121592
VASH1_ENSG00000071246.6	0.117773	0.876411	328	0.339402
LMCD1_ENSG00000071282.7	-0.0269643	0.205352	328	0.115246
WBSCR22_ENSG00000071462.7	0.0108547	0.138919	328	0.105486
SEL1L_ENSG00000071537.9	0.0110701	0.139967	328	0.105659
TRIP13_ENSG00000071539.9	0.0892931	0.742139	328	0.242407
ATP6AP1_ENSG00000071553.12	-0.0230784	0.196764	328	0.113923
TCF3_ENSG00000071564.10	0.0513993	0.399198	328	0.147729
TRIB2_ENSG00000071575.7	-0.0691736	0.507815	328	0.16858
DAZAP1_ENSG00000071626.12	0.202751	0.998527	328	0.833167
MBD3_ENSG00000071655.13	0.0825167	0.667305	328	0.211963
PRLH_ENSG00000071677.1	-0.0180844	0.175814	328	0.110921
HLTF_ENSG00000071794.11	0.0984107	0.750141	328	0.247049
FAM50A_ENSG00000071859.10	-0.0639016	0.493041	328	0.16511
FAM3A_ENSG00000071889.12	-0.0501151	0.395261	328	0.146874
CPSF1_ENSG00000071894.10	0.0252605	0.213841	328	0.116602
MYO3B_ENSG00000071909.14	-0.0603043	0.510436	328	0.168938
CYBRD1_ENSG00000071967.7	-0.0133144	0.148575	328	0.106954
CDH19_ENSG00000071991.4	-0.0340984	0.221389	328	0.117864
PDCD2_ENSG00000071994.6	0.218764	0.999626	328	0.893935
SLC6A15_ENSG00000072041.12	0.14078	0.924607	328	0.401588
RDH11_ENSG00000072042.8	-0.0160453	0.159099	328	0.108298
PRKACA_ENSG00000072062.9	0.0936416	0.73512	328	0.23866
LPHN1_ENSG00000072071.12	0.122624	0.89519	328	0.357757
SPP2_ENSG00000072080.6	0.0183368	0.17515	328	0.110862
ACTN1_ENSG00000072110.9	-0.0569575	0.378779	328	0.143304
ZFYVE26_ENSG00000072121.11	0.0117504	0.144032	328	0.106262
RPS6KA6_ENSG00000072133.6	0.0368491	0.266082	328	0.124546
EPN2_ENSG00000072134.11	0.0294642	0.220924	328	0.117803
PTPN18_ENSG00000072135.8	-0.0932431	0.749759	328	0.246861
LIMS2_ENSG00000072163.14	0.00561741	0.118885	328	0.102756
ASIC4_ENSG00000072182.8	0.041998	0.338569	328	0.136174
SPEG_ENSG00000072195.10	0.00477797	0.115043	328	0.102287
LNX1_ENSG00000072201.9	-0.0542993	0.429318	328	0.153118
ALDH3A2_ENSG00000072210.14	0.0613558	0.472673	328	0.161302
TFRC_ENSG00000072274.8	0.0118508	0.146121	328	0.106603
SREBF1_ENSG00000072310.12	0.099566	0.803165	328	0.278206
TRPC5_ENSG00000072315.3	-0.0303703	0.261427	328	0.123625
AFF4_ENSG00000072364.8	0.0569965	0.443516	328	0.155511
UBE2D1_ENSG00000072401.10	0.0197197	0.184786	328	0.112036
MPP5_ENSG00000072415.4	-0.0474211	0.365341	328	0.140872
RHOBTB1_ENSG00000072422.12	-0.00869925	0.129219	328	0.104218
ASAH2C_ENSG00000072444.10	0.0329411	0.280904	328	0.126549
SMC1A_ENSG00000072501.13	0.0911777	0.748528	328	0.246074
HSD17B10_ENSG00000072506.8	-0.0193388	0.179757	328	0.111412
MARK2_ENSG00000072518.16	0.0109012	0.136277	328	0.1052
HMMR_ENSG00000072571.15	0.049236	0.403789	328	0.148343
CHFR_ENSG00000072609.13	0.133337	0.914853	328	0.385405
TRHDE_ENSG00000072657.4	0.0428137	0.345575	328	0.137291
P4HA2_ENSG00000072682.14	-0.140796	0.915889	328	0.386435
FCGR2B_ENSG00000072694.14	0.0276366	0.198119	328	0.114047
NFATC3_ENSG00000072736.14	0.121159	0.900169	328	0.363187
TRNT1_ENSG00000072756.12	0.0531832	0.434181	328	0.154097
ACADVL_ENSG00000072778.15	-0.060276	0.519647	328	0.171147
STK10_ENSG00000072786.8	-0.068903	0.510335	328	0.168938
FBXW11_ENSG00000072803.13	0.094243	0.765442	328	0.255632
ACAP1_ENSG00000072818.7	-0.0460165	0.299649	328	0.129826
CRMP1_ENSG00000072832.10	0.145356	0.92501	328	0.40261
EVC_ENSG00000072840.8	0.241856	0.99898	328	0.853388
DERL2_ENSG00000072849.6	0.00291259	0.109388	328	0.101493
SIDT1_ENSG00000072858.6	-0.176935	0.983456	328	0.603471
NDE1_ENSG00000072864.8	0.1031	0.833273	328	0.300601
MRVI1_ENSG00000072952.14	-0.05067	0.431702	328	0.15368
TMEM38A_ENSG00000072954.2	-0.0418033	0.315165	328	0.132205
AP1M1_ENSG00000072958.4	0.180489	0.984095	328	0.606696
PVR_ENSG00000073008.10	-0.0390195	0.279136	328	0.126266
IKBKG_ENSG00000073009.8	-0.019416	0.180283	328	0.111412
XRCC1_ENSG00000073050.7	0.0747061	0.608999	328	0.19452
SCARB1_ENSG00000073060.11	0.0253468	0.212898	328	0.116497
CYP2W1_ENSG00000073067.9	-0.00572866	0.119349	328	0.102756
MCM2_ENSG00000073111.9	0.0761729	0.60107	328	0.192432
MOV10L1_ENSG00000073146.11	0.0705149	0.560122	328	0.18074
PANX2_ENSG00000073150.9	0.0193778	0.175138	328	0.110862
SELO_ENSG00000073169.9	0.015443	0.163657	328	0.10899
TP63_ENSG00000073282.8	-0.0582943	0.38885	328	0.145498
ALPK1_ENSG00000073331.13	-0.141826	0.962184	328	0.489895
LLGL2_ENSG00000073350.9	-0.274896	0.999534	328	0.882196
PDE8A_ENSG00000073417.10	0.0349748	0.273252	328	0.125442
CLCN4_ENSG00000073464.7	0.000389118	0.101181	328	0.100093
NLE1_ENSG00000073536.13	0.179652	0.995294	328	0.742094
SDHA_ENSG00000073578.12	0.101393	0.835806	328	0.302515
SMARCE1_ENSG00000073584.14	0.0407974	0.331187	328	0.134524
FNDC8_ENSG00000073598.5	-0.0218801	0.197164	328	0.113925
GSDMB_ENSG00000073605.14	-0.130193	0.920539	328	0.393717
KDM5A_ENSG00000073614.7	0.145291	0.971982	328	0.53239
ADAM11_ENSG00000073670.9	0.0738455	0.622962	328	0.197975
PPP2R3A_ENSG00000073711.6	-0.0169455	0.159551	328	0.108298
FERMT2_ENSG00000073712.9	0.197071	0.979757	328	0.573901
ABCB11_ENSG00000073734.8	-0.0493752	0.409946	328	0.149614
DHRS9_ENSG00000073737.12	-0.102402	0.833679	328	0.300987
CD5L_ENSG00000073754.5	-0.0133798	0.147566	328	0.106789
PTGS2_ENSG00000073756.7	-0.149165	0.974717	328	0.541746
IGF2BP2_ENSG00000073792.11	0.0434167	0.318631	328	0.13268
MAP3K13_ENSG00000073803.9	-0.0849418	0.680001	328	0.216704
ST6GAL1_ENSG00000073849.10	-0.0226694	0.193311	328	0.113233
TBX21_ENSG00000073861.2	0.119181	0.837511	328	0.304193
VDAC1P1_ENSG00000073905.8	0.0216839	0.19211	328	0.113011
FRY_ENSG00000073910.15	-0.0204502	0.182277	328	0.111776
PICALM_ENSG00000073921.13	0.0402175	0.332287	328	0.134836
NSF_ENSG00000073969.14	0.0481586	0.365824	328	0.140932
GLI2_ENSG00000074047.16	-0.0359132	0.267951	328	0.124791
CLASP1_ENSG00000074054.13	0.0727752	0.582912	328	0.186503
MRPS34_ENSG00000074071.9	-0.0167049	0.168582	328	0.109812
NOTCH3_ENSG00000074181.4	-0.00551318	0.116925	328	0.102578
CLNS1A_ENSG00000074201.4	0.0398064	0.323087	328	0.133234
PPP2R2C_ENSG00000074211.9	0.0189689	0.168913	328	0.109882
TEAD2_ENSG00000074219.9	-0.0110896	0.137431	328	0.105212
EED_ENSG00000074266.13	0.00623448	0.121779	328	0.103131
CDHR2_ENSG00000074276.6	0.0297612	0.245907	328	0.121212
SNCB_ENSG00000074317.6	0.0976549	0.786317	328	0.268186
TSG101_ENSG00000074319.8	-0.01918	0.184842	328	0.112036
C17orf85_ENSG00000074356.12	0.0758315	0.638303	328	0.202962
ATP2A3_ENSG00000074370.13	-0.0607363	0.44663	328	0.155825
CA12_ENSG00000074410.9	-0.0410793	0.311212	328	0.13146
MGLL_ENSG00000074416.9	-0.144587	0.973236	328	0.533786
NTN4_ENSG00000074527.7	-0.145338	0.966802	328	0.507512
BCS1L_ENSG00000074582.8	0.039497	0.306428	328	0.130923
NUAK1_ENSG00000074590.9	0.042644	0.314116	328	0.131975
DPP8_ENSG00000074603.14	0.0932168	0.774852	328	0.261435
SLC24A1_ENSG00000074621.9	0.0495537	0.399961	328	0.147892
ZNF532_ENSG00000074657.9	0.075218	0.565251	328	0.182061
SCARF1_ENSG00000074660.11	0.0590345	0.492585	328	0.164926
LMAN1_ENSG00000074695.5	0.178566	0.991278	328	0.682206
PTPLAD1_ENSG00000074696.8	0.122091	0.89147	328	0.354821
IPCEF1_ENSG00000074706.9	-0.0524647	0.413921	328	0.150059
ZZEF1_ENSG00000074755.10	0.0643298	0.534728	328	0.174657
NOX3_ENSG00000074771.3	0.0181787	0.165486	328	0.10944
ENO1_ENSG00000074800.9	0.104416	0.805996	328	0.279333
SLC12A1_ENSG00000074803.13	0.0166147	0.169503	328	0.109951
C19orf10_ENSG00000074842.3	-0.0255512	0.203569	328	0.114859
ANO8_ENSG00000074855.6	-0.00742339	0.125233	328	0.103674
TUBE1_ENSG00000074935.9	0.204403	0.998888	328	0.848441
ARHGEF10L_ENSG00000074964.12	-0.113825	0.866186	328	0.329312
TXK_ENSG00000074966.6	-0.122411	0.913292	328	0.382988
WSCD2_ENSG00000075035.5	-0.069945	0.610518	328	0.194769
KCNQ2_ENSG00000075043.13	0.110452	0.874335	328	0.337389
TACR2_ENSG00000075073.10	0.023017	0.204336	328	0.115013
ACTR6_ENSG00000075089.5	0.0414362	0.309284	328	0.131163
TIPIN_ENSG00000075131.5	0.0913395	0.734943	328	0.238592
SRI_ENSG00000075142.9	-0.0724782	0.602609	328	0.192667
EIF4G3_ENSG00000075151.15	0.142308	0.958633	328	0.475684
NUP37_ENSG00000075188.4	0.0346158	0.275235	328	0.125898
SEMA3A_ENSG00000075213.6	-0.0272503	0.220276	328	0.11763
GTSE1_ENSG00000075218.14	0.15909	0.984099	328	0.606696
SEMA3C_ENSG00000075223.9	-0.0172971	0.166559	328	0.109571
TTC38_ENSG00000075234.12	0.0628501	0.487915	328	0.164288
ACAT1_ENSG00000075239.9	0.0963148	0.790079	328	0.269573
GRAMD4_ENSG00000075240.12	-0.0597775	0.478584	328	0.162058
CELSR1_ENSG00000075275.12	0.0502417	0.364716	328	0.140833
WNT8B_ENSG00000075290.7	-0.0354112	0.2828	328	0.127113
ZNF638_ENSG00000075292.14	0.0704696	0.58487	328	0.187107
SLC25A40_ENSG00000075303.8	-0.0753111	0.641764	328	0.203812
TIMM21_ENSG00000075336.7	0.180833	0.991622	328	0.682206
ADD2_ENSG00000075340.18	0.023462	0.190306	328	0.112682
FGF4_ENSG00000075388.2	-0.0147976	0.161113	328	0.108624
RASAL2_ENSG00000075391.12	0.012218	0.143254	328	0.106179
VPS9D1_ENSG00000075399.8	-0.041926	0.311158	328	0.13146
ZNF37A_ENSG00000075407.13	0.204975	0.998902	328	0.848441
MARK3_ENSG00000075413.13	0.0573302	0.460124	328	0.158645
SLC25A3_ENSG00000075415.8	0.210646	0.999207	328	0.862776
FNDC3B_ENSG00000075420.8	-0.0299818	0.241796	328	0.120548
FOSL2_ENSG00000075426.7	-0.169975	0.989555	328	0.658669
CACNG5_ENSG00000075429.4	0.0399617	0.321092	328	0.132901
CACNG4_ENSG00000075461.5	-0.144763	0.947731	328	0.4464
FRYL_ENSG00000075539.9	0.0597063	0.495285	328	0.165715
TMEM131_ENSG00000075568.12	0.0767133	0.622365	328	0.197901
FSCN1_ENSG00000075618.13	0.060673	0.420564	328	0.151303
ACTB_ENSG00000075624.9	-0.0418537	0.318525	328	0.13268
MOCOS_ENSG00000075643.5	-0.0377806	0.29554	328	0.129094
PLD1_ENSG00000075651.11	-0.057236	0.457191	328	0.158161
ATP12A_ENSG00000075673.7	-0.0428459	0.360811	328	0.140213
WDR62_ENSG00000075702.12	0.120376	0.895465	328	0.35806
DLG1_ENSG00000075711.16	-0.0649307	0.534984	328	0.174749
RAB7A_ENSG00000075785.8	-0.0839068	0.670677	328	0.213566
BCAP29_ENSG00000075790.6	-0.0239107	0.203129	328	0.114804
SEC31B_ENSG00000075826.12	0.0522306	0.41294	328	0.149969
SART3_ENSG00000075856.7	0.135446	0.954121	328	0.463809
ARHGAP15_ENSG00000075884.8	-0.0278405	0.169308	328	0.10992
TUBA3D_ENSG00000075886.10	0.0165294	0.166576	328	0.109571
PAX2_ENSG00000075891.17	0.0509269	0.397922	328	0.147478
EXOSC7_ENSG00000075914.8	0.0416766	0.330341	328	0.134419
KIFAP3_ENSG00000075945.8	0.0582366	0.454123	328	0.157427
MKRN2_ENSG00000075975.11	0.0395109	0.311568	328	0.131544
MCM6_ENSG00000076003.4	0.0759344	0.61323	328	0.195858
REXO2_ENSG00000076043.5	0.0359037	0.289886	328	0.128412
RBM7_ENSG00000076053.6	0.00704024	0.12411	328	0.103477
RBMS2_ENSG00000076067.7	-0.0184418	0.17167	328	0.110337
BAZ2A_ENSG00000076108.7	0.129545	0.945594	328	0.441628
PTPN23_ENSG00000076201.10	0.11988	0.889608	328	0.351934
MLH1_ENSG00000076242.10	0.0555363	0.441969	328	0.155244
UNG_ENSG00000076248.6	0.0708113	0.581215	328	0.186253
FMO4_ENSG00000076258.5	-0.131649	0.939488	328	0.428307
KLHL20_ENSG00000076321.6	-0.012335	0.14427	328	0.106262
RGS11_ENSG00000076344.11	-0.0927985	0.758908	328	0.25193
SLC46A1_ENSG00000076351.8	-0.0385624	0.300461	328	0.130065
PLXNA2_ENSG00000076356.6	-0.0992495	0.790412	328	0.269573
SPAG5_ENSG00000076382.12	0.098333	0.793467	328	0.271499
ANKRD13A_ENSG00000076513.12	-0.0648338	0.536061	328	0.174982
TPD52_ENSG00000076554.11	-0.130224	0.874011	328	0.336994
ACACB_ENSG00000076555.11	-0.00133743	0.104301	328	0.100807
TRAF4_ENSG00000076604.10	-0.129763	0.915364	328	0.385813
PAG1_ENSG00000076641.4	-0.0190527	0.169629	328	0.109959
GPATCH1_ENSG00000076650.2	0.0114375	0.142519	328	0.106033
ICAM3_ENSG00000076662.5	-0.145216	0.921768	328	0.395191
NT5C2_ENSG00000076685.14	-0.0377959	0.297813	328	0.129432
MCAM_ENSG00000076706.10	-0.0243839	0.194875	328	0.113566
GPC4_ENSG00000076716.7	-0.00621757	0.121318	328	0.103051
MBNL3_ENSG00000076770.10	0.0287272	0.237577	328	0.120042
CAMSAP3_ENSG00000076826.5	-0.119876	0.768449	328	0.257902
RAP1GAP_ENSG00000076864.15	-0.0183072	0.169812	328	0.11001
XAB2_ENSG00000076924.7	0.013444	0.152201	328	0.107404
ARHGEF1_ENSG00000076928.13	0.0187355	0.170207	328	0.110081
STXBP2_ENSG00000076944.10	-0.18565	0.980719	328	0.580315
MAP2K7_ENSG00000076984.13	0.00862983	0.130476	328	0.104346
NMRK2_ENSG00000077009.9	-0.117382	0.917894	328	0.389098
DGKD_ENSG00000077044.5	0.0461138	0.35382	328	0.138915
CTTNBP2_ENSG00000077063.6	0.00284273	0.109534	328	0.101505
ACTL6B_ENSG00000077080.5	0.0139753	0.147263	328	0.106737
RARB_ENSG00000077092.14	0.0629432	0.487548	328	0.164277
TOP2B_ENSG00000077097.9	0.17351	0.991469	328	0.682206
TM9SF3_ENSG00000077147.10	0.0800943	0.67243	328	0.214043
NFKB2_ENSG00000077150.13	0.014169	0.154192	328	0.107746
UBE2T_ENSG00000077152.5	0.000815174	0.102476	328	0.100414
PPP1R12B_ENSG00000077157.16	-0.090197	0.755052	328	0.249299
DNAJC10_ENSG00000077232.12	0.0319544	0.257624	328	0.123166
GTF3C1_ENSG00000077235.13	0.101173	0.821805	328	0.291444
IL4R_ENSG00000077238.9	-0.0883061	0.708562	328	0.226842
USP33_ENSG00000077254.10	0.0983808	0.808348	328	0.280827
PAK3_ENSG00000077264.10	-0.0505943	0.389781	328	0.145637
CAPN6_ENSG00000077274.7	-0.0209277	0.192482	328	0.113116
DCX_ENSG00000077279.12	0.0272901	0.226819	328	0.118559
SNRPA_ENSG00000077312.4	0.183389	0.994427	328	0.729265
SPAG6_ENSG00000077327.11	0.0744174	0.617099	328	0.196643
EXOSC5_ENSG00000077348.4	0.0674054	0.545743	328	0.17742
DYNC1I2_ENSG00000077380.11	-0.00733275	0.123925	328	0.103452
APBB1IP_ENSG00000077420.11	0.0939468	0.625171	328	0.198435
LRCH4_ENSG00000077454.11	-0.0619361	0.502109	328	0.167278
FAM76B_ENSG00000077458.8	0.0655488	0.54243	328	0.176683
SIRT6_ENSG00000077463.10	-0.0277808	0.225855	328	0.118435
TYR_ENSG00000077498.8	-0.131785	0.71886	328	0.231138
POLD3_ENSG00000077514.4	0.0733054	0.613089	328	0.195818
ACTN2_ENSG00000077522.8	0.0137413	0.151737	328	0.107369
CAPZB_ENSG00000077549.13	0.0871404	0.717568	328	0.230781
GPR137B_ENSG00000077585.9	-0.159121	0.963676	328	0.496358
NAALAD2_ENSG00000077616.6	0.122919	0.915071	328	0.385405
PHF17_ENSG00000077684.11	0.179571	0.985685	328	0.619857
SLC25A43_ENSG00000077713.14	0.0509945	0.41321	328	0.150002
UBE2A_ENSG00000077721.11	-0.0280528	0.238076	328	0.120085
FGFR1_ENSG00000077782.15	0.230509	0.998555	328	0.83398
FKBP6_ENSG00000077800.7	-0.0360809	0.293307	328	0.128873
GTF2I_ENSG00000077809.8	0.0236288	0.202957	328	0.114735
SMC1B_ENSG00000077935.12	0.0173748	0.172159	328	0.110422
FBLN1_ENSG00000077942.13	0.0582032	0.406202	328	0.148824
ITGA8_ENSG00000077943.7	-0.0447441	0.294664	328	0.128998
CST7_ENSG00000077984.4	-0.174401	0.979738	328	0.573901
MAP2_ENSG00000078018.15	0.0959216	0.68794	328	0.219537
PIAS2_ENSG00000078043.11	0.183129	0.994368	328	0.727394
AMPH_ENSG00000078053.12	-0.0273474	0.213599	328	0.116546
ARAF_ENSG00000078061.8	-0.0404424	0.324501	328	0.1336
MCCC1_ENSG00000078070.7	-0.0343924	0.276858	328	0.125994
LAMP3_ENSG00000078081.3	-0.0965084	0.772901	328	0.260574
FAP_ENSG00000078098.9	0.0707032	0.489247	328	0.164294
NEBL_ENSG00000078114.14	0.0285887	0.221014	328	0.117807
ACER3_ENSG00000078124.7	-0.049937	0.410186	328	0.149661
UBE2K_ENSG00000078140.9	0.0513688	0.423721	328	0.152118
PIK3C3_ENSG00000078142.7	0.133867	0.925983	328	0.404544
N4BP2_ENSG00000078177.9	0.156085	0.968971	328	0.518457
C12orf5_ENSG00000078237.4	-0.0247116	0.205442	328	0.115254
TULP3_ENSG00000078246.11	0.227217	0.999539	328	0.882339
SYNJ2_ENSG00000078269.9	0.0364203	0.272478	328	0.12538
ADCY2_ENSG00000078295.11	-0.0577399	0.483727	328	0.163409
PPP2R5C_ENSG00000078304.15	0.00730331	0.124277	328	0.103477
PMS2P1_ENSG00000078319.7	-0.0187308	0.176063	328	0.110956
RBFOX1_ENSG00000078328.15	-0.00934643	0.133263	328	0.104796
GNB1_ENSG00000078369.13	0.0738876	0.59799	328	0.191265
HOXA9_ENSG00000078399.11	-0.0452762	0.309656	328	0.131222
EDN1_ENSG00000078401.6	-0.139825	0.94237	328	0.433969
MLLT10_ENSG00000078403.12	0.233133	0.999886	328	0.928852
ZCWPW1_ENSG00000078487.13	-0.0330291	0.271142	328	0.125077
ADCYAP1R1_ENSG00000078549.10	0.0379482	0.306249	328	0.130891
FGF20_ENSG00000078579.8	-0.00810975	0.128914	328	0.104211
P2RY10_ENSG00000078589.8	-0.0413574	0.282137	328	0.126959
ITM2A_ENSG00000078596.6	0.0541993	0.411323	328	0.149714
NRD1_ENSG00000078618.15	0.106773	0.840361	328	0.307011
VDAC3_ENSG00000078668.9	0.0386516	0.308137	328	0.131024
PCM1_ENSG00000078674.13	0.0634115	0.504306	328	0.16776
TNRC6C_ENSG00000078687.12	0.103108	0.795242	328	0.27259
CBFA2T2_ENSG00000078699.17	0.0150049	0.157501	328	0.108215
BRINP1_ENSG00000078725.8	-0.0938277	0.767091	328	0.256965
ITCH_ENSG00000078747.8	-0.0397824	0.310721	328	0.131425
PKD2L2_ENSG00000078795.12	-0.0353161	0.272226	328	0.125317
TP53INP2_ENSG00000078804.8	-0.00776369	0.124841	328	0.103603
SDF4_ENSG00000078808.12	0.0660432	0.537394	328	0.175317
MYH7B_ENSG00000078814.11	-0.0057628	0.120493	328	0.102903
BPIFB2_ENSG00000078898.6	-0.0388661	0.315008	328	0.132144
TP73_ENSG00000078900.10	-0.0360516	0.281501	328	0.126702
TOLLIP_ENSG00000078902.11	-0.0298359	0.246788	328	0.121396
UBE2D4_ENSG00000078967.8	-0.070125	0.558128	328	0.180419
CLUL1_ENSG00000079101.12	0.0108172	0.140551	328	0.105741
RUNX1T1_ENSG00000079102.12	0.0501383	0.373587	328	0.142257
CDH17_ENSG00000079112.5	-0.0227564	0.180772	328	0.111494
THOC1_ENSG00000079134.7	0.159366	0.981803	328	0.589767
FKBP7_ENSG00000079150.13	0.00871227	0.12536	328	0.103696
OSBPL6_ENSG00000079156.12	0.243784	0.999766	328	0.905306
SLC1A3_ENSG00000079215.9	-0.0595789	0.467504	328	0.160238
XRCC5_ENSG00000079246.11	0.0893068	0.71128	328	0.227971
LXN_ENSG00000079257.3	-0.147731	0.964271	328	0.498299
SP140_ENSG00000079263.14	0.0447853	0.316807	328	0.132586
MKNK1_ENSG00000079277.15	-0.0130338	0.148648	328	0.106954
TNS1_ENSG00000079308.12	0.037891	0.296085	328	0.1291
REXO1_ENSG00000079313.7	0.0072157	0.125862	328	0.103776
SAR1A_ENSG00000079332.10	0.126068	0.928848	328	0.409898
CDC14A_ENSG00000079335.13	0.0946674	0.772287	328	0.260033
RAPGEF3_ENSG00000079337.11	-0.0418379	0.277142	328	0.126016
CEACAM1_ENSG00000079385.17	-0.223408	0.999114	328	0.859842
SENP1_ENSG00000079387.9	0.181447	0.993027	328	0.70185
DUSP13_ENSG00000079393.16	0.00148375	0.104842	328	0.100914
CIC_ENSG00000079432.3	0.0967811	0.777557	328	0.263106
LIPE_ENSG00000079435.5	-0.0158249	0.163034	328	0.108961
FDFT1_ENSG00000079459.8	-0.0514399	0.428595	328	0.153118
PAFAH1B3_ENSG00000079462.3	0.0636991	0.488388	328	0.164294
OPHN1_ENSG00000079482.11	0.03441	0.242737	328	0.120731
AFM_ENSG00000079557.3	0.025656	0.225626	328	0.118435
KIF22_ENSG00000079616.8	0.0955632	0.77896	328	0.264262
SCGN_ENSG00000079689.9	0.0235185	0.20154	328	0.114462
LRRC16A_ENSG00000079691.15	-0.164356	0.977209	328	0.555818
PGM1_ENSG00000079739.11	-0.0255536	0.208199	328	0.115679
DDX1_ENSG00000079785.10	0.108057	0.836531	328	0.30316
DNM2_ENSG00000079805.12	0.036892	0.298231	328	0.129568
EPB41L2_ENSG00000079819.12	0.137174	0.93343	328	0.417024
RIMS1_ENSG00000079841.14	0.0127843	0.148987	328	0.106972
MOXD1_ENSG00000079931.10	0.0209718	0.174358	328	0.11079
STX7_ENSG00000079950.9	0.0656755	0.539299	328	0.175999
RABL2B_ENSG00000079974.13	0.0293473	0.238796	328	0.120226
KEAP1_ENSG00000079999.9	-0.00246268	0.108323	328	0.10137
DDX43_ENSG00000080007.6	7.36806e-05	0.100237	328	0.100028
PTPRH_ENSG00000080031.5	-0.0180701	0.170775	328	0.110176
DCT_ENSG00000080166.11	-0.0441316	0.234511	328	0.119537
SLC35C2_ENSG00000080189.10	0.0173744	0.169808	328	0.11001
CRYBG3_ENSG00000080200.5	-0.0250319	0.208576	328	0.115751
EPHA6_ENSG00000080224.13	0.0237948	0.207597	328	0.115526
SCTR_ENSG00000080293.5	-0.00816251	0.129445	328	0.104259
RFX3_ENSG00000080298.11	0.0849137	0.68916	328	0.219977
RIF1_ENSG00000080345.13	0.0462668	0.358761	328	0.139588
RAB21_ENSG00000080371.4	-0.0558079	0.480776	328	0.1628
SLC4A4_ENSG00000080493.9	-0.0414297	0.305224	328	0.130694
SMARCA2_ENSG00000080503.15	-0.0629647	0.507252	328	0.168496
RDH8_ENSG00000080511.2	-0.0756006	0.636573	328	0.202177
SESN1_ENSG00000080546.9	0.045222	0.358396	328	0.139544
MID2_ENSG00000080561.9	-0.0256217	0.209329	328	0.115873
PIH1D3_ENSG00000080572.8	0.0214797	0.196235	328	0.113857
COL5A3_ENSG00000080573.6	-0.0914369	0.685598	328	0.218437
SRCAP_ENSG00000080603.12	0.0812861	0.680055	328	0.216704
KIAA0020_ENSG00000080608.9	0.0176349	0.173603	328	0.110676
CPB2_ENSG00000080618.9	0.0277131	0.223844	328	0.118209
CHRNA3_ENSG00000080644.11	0.120705	0.889699	328	0.351934
KCNN2_ENSG00000080709.10	0.0162757	0.155715	328	0.107998
CNOT4_ENSG00000080802.14	0.0134283	0.152307	328	0.107413
PSEN1_ENSG00000080815.14	-0.0887796	0.729895	328	0.236224
CPOX_ENSG00000080819.2	0.0634334	0.495889	328	0.165831
CLDND1_ENSG00000080822.12	0.0218479	0.186567	328	0.112228
MOK_ENSG00000080823.17	0.0738576	0.579403	328	0.185779
HSP90AA1_ENSG00000080824.14	0.0311104	0.252261	328	0.122649
RBL1_ENSG00000080839.7	0.0665	0.557793	328	0.180358
DLGAP4_ENSG00000080845.13	-0.0241697	0.200681	328	0.11428
IGSF9B_ENSG00000080854.10	0.0548349	0.413673	328	0.150059
CFHR2_ENSG00000080910.7	0.084261	0.742566	328	0.242621
CROCCP3_ENSG00000080947.10	0.0850928	0.710225	328	0.227631
NDC80_ENSG00000080986.8	0.12559	0.92108	328	0.394701
AP4E1_ENSG00000081014.6	0.0983762	0.806527	328	0.279718
RSBN1_ENSG00000081019.9	0.0351366	0.278857	328	0.126222
MAGI3_ENSG00000081026.14	0.0500468	0.366823	328	0.141092
CXCL2_ENSG00000081041.8	-0.0412758	0.330301	328	0.134419
AFP_ENSG00000081051.3	0.154435	0.977214	328	0.555818
COL4A4_ENSG00000081052.10	-0.0164638	0.164614	328	0.109194
TCF7_ENSG00000081059.15	0.0475792	0.353594	328	0.138894
OSTM1_ENSG00000081087.10	0.130999	0.886059	328	0.347752
CDH7_ENSG00000081138.9	0.0893257	0.725041	328	0.233988
IMPG2_ENSG00000081148.11	0.0781879	0.698158	328	0.223108
PCNP_ENSG00000081154.7	0.0308066	0.25232	328	0.122649
EXD2_ENSG00000081177.14	-0.0732238	0.574448	328	0.184597
ARG2_ENSG00000081181.3	0.0138833	0.152105	328	0.107396
MEF2C_ENSG00000081189.9	-0.00662572	0.1196	328	0.102756
PTPRC_ENSG00000081237.14	-0.0758082	0.301337	328	0.130244
CACNA1S_ENSG00000081248.6	0.0313072	0.268772	328	0.124841
PKP1_ENSG00000081277.7	-0.0432749	0.310829	328	0.131425
UBA5_ENSG00000081307.8	0.0228531	0.202098	328	0.114594
STK17B_ENSG00000081320.6	-0.0045818	0.115103	328	0.102287
CDC14B_ENSG00000081377.12	-0.0918538	0.697252	328	0.222744
ZNF510_ENSG00000081386.8	-0.00192583	0.106144	328	0.101017
LRP2_ENSG00000081479.8	-0.0113263	0.14174	328	0.105985
ZNF506_ENSG00000081665.9	-0.127226	0.939837	328	0.428362
JMJD4_ENSG00000081692.8	0.0129916	0.147593	328	0.106789
DUSP12_ENSG00000081721.7	0.0615205	0.509372	328	0.168772
AACS_ENSG00000081760.12	-0.0024554	0.108013	328	0.101314
KIAA0141_ENSG00000081791.4	0.0387579	0.321411	328	0.132972
SLC13A1_ENSG00000081800.4	-0.0101123	0.138408	328	0.105415
CADPS2_ENSG00000081803.11	-0.063107	0.500536	328	0.167086
PCDHB4_ENSG00000081818.1	-0.0680684	0.566898	328	0.182614
PCDHA6_ENSG00000081842.13	0.0212305	0.190965	328	0.112743
PCDHGA2_ENSG00000081853.13	-0.0720788	0.576309	328	0.185063
HSPB11_ENSG00000081870.7	-0.0443784	0.363453	328	0.140606
PHLPP1_ENSG00000081913.9	0.0114233	0.140945	328	0.105789
ATP8B1_ENSG00000081923.6	-0.145853	0.940203	328	0.428682
IL12RB2_ENSG00000081985.6	-0.0339295	0.271069	328	0.12504
SMARCD3_ENSG00000082014.12	0.122983	0.911284	328	0.379782
WDR70_ENSG00000082068.4	-0.0247314	0.206298	328	0.115414
FYB_ENSG00000082074.11	-0.0655688	0.47022	328	0.160812
MPP4_ENSG00000082126.13	0.114731	0.862252	328	0.325597
STRADB_ENSG00000082146.8	0.000263188	0.100774	328	0.100043
BZW1_ENSG00000082153.13	0.0371599	0.295489	328	0.129094
PGR_ENSG00000082175.10	-0.0472321	0.355364	328	0.139172
C1QTNF3_ENSG00000082196.16	-0.0513183	0.401833	328	0.148069
ME2_ENSG00000082212.7	0.163991	0.969956	328	0.523233
C5orf22_ENSG00000082213.13	0.0315184	0.256333	328	0.123024
CCNT2_ENSG00000082258.8	-0.00482927	0.115998	328	0.10247
FAM135A_ENSG00000082269.12	0.0303287	0.230116	328	0.119157
COL19A1_ENSG00000082293.8	-0.195724	0.976219	328	0.549672
EPB41L3_ENSG00000082397.11	0.068241	0.514977	328	0.169998
COBLL1_ENSG00000082438.11	-0.0334391	0.270196	328	0.124908
DLG3_ENSG00000082458.7	-0.0836713	0.589483	328	0.188401
KCNK2_ENSG00000082482.9	-0.0558055	0.448275	328	0.156139
SERTAD4_ENSG00000082497.7	-0.00980825	0.131598	328	0.104486
TRAF5_ENSG00000082512.10	-0.0300444	0.243423	328	0.120949
MRPL22_ENSG00000082515.12	-0.0154828	0.16486	328	0.109298
GEMIN5_ENSG00000082516.8	0.169553	0.992951	328	0.700968
OPRK1_ENSG00000082556.6	-0.0284987	0.238879	328	0.120237
NFE2L1_ENSG00000082641.11	0.118349	0.891879	328	0.354821
SEMA5B_ENSG00000082684.10	-0.047579	0.384534	328	0.14444
GSK3B_ENSG00000082701.10	-0.0383652	0.29816	328	0.129567
ITGB5_ENSG00000082781.7	-0.0986283	0.740448	328	0.241541
ERC1_ENSG00000082805.15	0.186511	0.995725	328	0.753577
XPO1_ENSG00000082898.12	0.141263	0.963812	328	0.496707
C4orf6_ENSG00000082929.4	-0.0901973	0.753446	328	0.248587
RNF13_ENSG00000082996.15	-0.0641435	0.537974	328	0.175517
TRPM3_ENSG00000083067.18	0.0448721	0.341002	328	0.136426
PALB2_ENSG00000083093.5	-0.059691	0.484483	328	0.163712
DOPEY1_ENSG00000083097.10	0.0227029	0.200394	328	0.114207
LYRM2_ENSG00000083099.6	0.135824	0.949948	328	0.452669
BCKDHB_ENSG00000083123.10	0.134734	0.954956	328	0.466455
KAT6A_ENSG00000083168.5	0.1163	0.891973	328	0.354821
ZCCHC6_ENSG00000083223.13	-0.00734132	0.126167	328	0.103776
ULK2_ENSG00000083290.15	0.0642467	0.48977	328	0.164462
GRHL2_ENSG00000083307.6	-0.207406	0.990238	328	0.667492
TNPO1_ENSG00000083312.13	0.170295	0.990215	328	0.667481
PLOD1_ENSG00000083444.12	-0.0158364	0.153054	328	0.107512
P2RX5_ENSG00000083454.17	-0.065218	0.53651	328	0.175086
ITGAE_ENSG00000083457.7	-0.0116348	0.143749	328	0.106257
DIS3_ENSG00000083520.10	0.0789407	0.655357	328	0.208328
PIBF1_ENSG00000083535.11	0.042709	0.344302	328	0.13702
TDRD3_ENSG00000083544.9	0.102157	0.820084	328	0.289844
AC000111.6_ENSG00000083622.8	-0.033268	0.280192	328	0.126487
NUFIP1_ENSG00000083635.7	0.111748	0.881104	328	0.34351
PDS5B_ENSG00000083642.14	0.0471722	0.387455	328	0.145182
OXCT1_ENSG00000083720.8	0.0399768	0.320967	328	0.132901
RRAGB_ENSG00000083750.8	-0.00186361	0.105882	328	0.101007
EPYC_ENSG00000083782.3	0.160262	0.990349	328	0.669837
CYLD_ENSG00000083799.13	0.00202932	0.106193	328	0.10103
SLC27A5_ENSG00000083807.5	-0.0396886	0.307237	328	0.131021
ZNF324_ENSG00000083812.7	0.00261402	0.108372	328	0.10137
ZNF671_ENSG00000083814.8	0.0440276	0.30981	328	0.131233
ZNF416_ENSG00000083817.8	0.00633496	0.121728	328	0.103111
ZNF586_ENSG00000083828.11	0.0369134	0.290942	328	0.128507
ZNF446_ENSG00000083838.11	0.0333153	0.262893	328	0.123842
None_ENSG00000083842.8	-0.00842109	0.129614	328	0.104259
ZNF264_ENSG00000083844.6	0.0446351	0.351381	328	0.138649
RPS5_ENSG00000083845.4	0.0674068	0.579886	328	0.185978
FAT1_ENSG00000083857.9	0.0664721	0.493047	328	0.16511
YTHDC1_ENSG00000083896.8	0.0106253	0.140112	328	0.105659
CHMP2B_ENSG00000083937.4	-0.0102252	0.135669	328	0.105169
SMAP2_ENSG00000084070.7	0.102966	0.771889	328	0.259954
PPIE_ENSG00000084072.12	0.124179	0.922522	328	0.396633
ZMPSTE24_ENSG00000084073.4	0.0781862	0.668189	328	0.212358
STARD7_ENSG00000084090.9	0.0520781	0.409884	328	0.149603
NOA1_ENSG00000084092.6	0.0940743	0.77591	328	0.262185
REST_ENSG00000084093.11	0.0589833	0.454113	328	0.157427
HAL_ENSG00000084110.6	-0.0391729	0.291485	328	0.128553
SSH1_ENSG00000084112.10	0.0874954	0.612004	328	0.195417
GSTP1_ENSG00000084207.11	0.0344388	0.251565	328	0.122492
APLP2_ENSG00000084234.12	0.0719912	0.586029	328	0.187434
KIAA1467_ENSG00000084444.9	0.0467252	0.371467	328	0.141971
SLCO1A2_ENSG00000084453.12	0.0302003	0.24182	328	0.120548
WBP11_ENSG00000084463.3	0.162393	0.990669	328	0.674195
EIF3I_ENSG00000084623.7	0.0380299	0.291494	328	0.128553
NKAIN1_ENSG00000084628.5	0.0641213	0.504679	328	0.167795
COL16A1_ENSG00000084636.13	-0.0962631	0.738908	328	0.240453
TXLNA_ENSG00000084652.11	0.0806216	0.662161	328	0.210246
APOB_ENSG00000084674.9	0.11786	0.888246	328	0.350752
NCOA1_ENSG00000084676.11	0.129011	0.924702	328	0.401588
AGBL5_ENSG00000084693.11	0.11344	0.864689	328	0.327778
EFR3B_ENSG00000084710.9	0.0702312	0.529312	328	0.173299
KIF3C_ENSG00000084731.9	-0.0321079	0.24037	328	0.120331
RAB10_ENSG00000084733.6	-0.0519708	0.44101	328	0.155132
GCKR_ENSG00000084734.4	-0.0312466	0.253223	328	0.122843
HADHA_ENSG00000084754.6	0.0541293	0.449423	328	0.156274
MAPRE3_ENSG00000084764.6	-0.054279	0.409847	328	0.149603
CAD_ENSG00000084774.9	0.139141	0.959315	328	0.478014
CD59_ENSG00000085063.10	-0.0980109	0.707253	328	0.226535
CD82_ENSG00000085117.7	-0.0902167	0.714078	328	0.229205
BCORL1_ENSG00000085185.11	0.128255	0.938977	328	0.428042
ATRX_ENSG00000085224.16	0.0997261	0.805399	328	0.27916
TAF9_ENSG00000085231.9	0.119173	0.9107	328	0.379288
FCN1_ENSG00000085265.6	-0.0243172	0.204827	328	0.115127
MYNN_ENSG00000085274.11	-0.00990073	0.137648	328	0.105235
MECOM_ENSG00000085276.13	0.0259844	0.214327	328	0.116679
SCAMP1_ENSG00000085365.13	0.0840583	0.685624	328	0.218437
PREP_ENSG00000085377.9	0.100919	0.795336	328	0.272656
HACE1_ENSG00000085382.7	0.170806	0.990876	328	0.676643
SEH1L_ENSG00000085415.11	0.176373	0.993404	328	0.706861
WDR47_ENSG00000085433.11	0.0432516	0.331015	328	0.134473
WDFY1_ENSG00000085449.10	-0.0200546	0.180833	328	0.111502
OVGP1_ENSG00000085465.11	-0.0500787	0.409751	328	0.149588
SLC25A24_ENSG00000085491.11	-0.106978	0.855396	328	0.320137
MAP3K4_ENSG00000085511.15	0.202871	0.998831	328	0.846846
PILRA_ENSG00000085514.11	-0.00742582	0.127146	328	0.103915
IGSF9_ENSG00000085552.12	-0.119434	0.830867	328	0.298714
ABCB1_ENSG00000085563.10	0.0339446	0.265739	328	0.124522
ZNF213_ENSG00000085644.9	0.0241866	0.207744	328	0.115541
AKR1B1_ENSG00000085662.9	0.00840762	0.123655	328	0.103371
CPNE3_ENSG00000085719.7	0.09214	0.744829	328	0.243898
RRN3_ENSG00000085721.8	-0.0157501	0.162251	328	0.108834
CTTN_ENSG00000085733.11	0.108852	0.612758	328	0.19571
WNT11_ENSG00000085741.8	0.00495331	0.116702	328	0.102578
MTIF2_ENSG00000085760.10	0.0810125	0.670323	328	0.21344
DDHD2_ENSG00000085788.9	0.116404	0.894352	328	0.356243
TTC39A_ENSG00000085831.11	-0.129497	0.873472	328	0.336204
EPS15_ENSG00000085832.12	0.0633047	0.536772	328	0.175105
ORC1_ENSG00000085840.8	0.0901309	0.746739	328	0.245075
MGST2_ENSG00000085871.4	-0.161953	0.986699	328	0.630111
CHERP_ENSG00000085872.10	0.0899661	0.746623	328	0.245019
ATG16L1_ENSG00000085978.17	-0.0767437	0.64868	328	0.206356
USP40_ENSG00000085982.9	0.050893	0.418403	328	0.151013
POMGNT1_ENSG00000085998.9	0.0707671	0.523628	328	0.171987
RAD54L_ENSG00000085999.7	0.168211	0.990714	328	0.674572
MAST2_ENSG00000086015.16	0.0776056	0.63624	328	0.202061
DNAJA1_ENSG00000086061.11	0.0520583	0.426271	328	0.152759
B4GALT1_ENSG00000086062.8	-0.0372754	0.291828	328	0.128585
CHMP5_ENSG00000086065.9	-0.0771301	0.646075	328	0.20557
NFX1_ENSG00000086102.14	0.0625607	0.522144	328	0.171657
AQP6_ENSG00000086159.8	-0.151256	0.982074	328	0.591485
DIMT1_ENSG00000086189.5	0.189341	0.997408	328	0.793138
IPO11_ENSG00000086200.12	0.146809	0.980498	328	0.578181
FOLH1_ENSG00000086205.12	0.0436065	0.344606	328	0.13702
EIF2AK1_ENSG00000086232.8	-0.029192	0.235888	328	0.119768
NME8_ENSG00000086288.7	0.046095	0.37861	328	0.14326
EPDR1_ENSG00000086289.7	-0.077874	0.628671	328	0.199745
SNX10_ENSG00000086300.11	-0.0699441	0.55571	328	0.180016
SEPHS1_ENSG00000086475.10	0.217929	0.999533	328	0.882196
MRPL28_ENSG00000086504.11	0.0700939	0.605197	328	0.19341
HBQ1_ENSG00000086506.2	0.121252	0.901355	328	0.364957
ITPKC_ENSG00000086544.2	-0.111648	0.871915	328	0.334341
CEACAM6_ENSG00000086548.8	-0.157769	0.98041	328	0.577943
FAT2_ENSG00000086570.8	-0.017222	0.158483	328	0.108298
RBM22_ENSG00000086589.7	0.0909127	0.776177	328	0.262245
TMED2_ENSG00000086598.6	-0.00590198	0.119958	328	0.102803
ERO1LB_ENSG00000086619.9	0.0298889	0.247388	328	0.121543
ZFAND6_ENSG00000086666.14	-0.171873	0.994631	328	0.734288
HSD17B2_ENSG00000086696.6	0.00254656	0.108106	328	0.101318
TXLNG_ENSG00000086712.8	0.110698	0.859721	328	0.322623
PPEF1_ENSG00000086717.14	0.0731095	0.632873	328	0.200834
LAT2_ENSG00000086730.12	0.0432474	0.312314	328	0.131652
HUWE1_ENSG00000086758.11	0.0189299	0.177472	328	0.111149
ZW10_ENSG00000086827.4	0.129295	0.94308	328	0.434844
ALG9_ENSG00000086848.10	0.105809	0.858576	328	0.322401
MYBPC2_ENSG00000086967.9	-0.0284538	0.22725	328	0.118649
NOX4_ENSG00000086991.8	-0.0320887	0.251673	328	0.122536
ACOX3_ENSG00000087008.11	0.192162	0.99689	328	0.779598
MTMR2_ENSG00000087053.14	0.015966	0.162815	328	0.108937
PPP1R15A_ENSG00000087074.7	-0.0685536	0.555573	328	0.180002
HSD17B14_ENSG00000087076.4	0.135961	0.946345	328	0.443189
TRIP6_ENSG00000087077.7	-0.10705	0.793625	328	0.271499
ACHE_ENSG00000087085.9	-0.0873498	0.741914	328	0.242289
FTL_ENSG00000087086.9	0.00475436	0.115098	328	0.102287
SRRT_ENSG00000087087.14	0.0609868	0.509402	328	0.168772
BAX_ENSG00000087088.15	-0.0510089	0.384754	328	0.144461
NLK_ENSG00000087095.8	0.116654	0.89797	328	0.359569
PIGS_ENSG00000087111.16	0.0475145	0.384607	328	0.144447
ADAMTS2_ENSG00000087116.9	0.0761127	0.637493	328	0.202712
TMPRSS11E_ENSG00000087128.5	-0.0842578	0.720309	328	0.231966
ATXN7L3_ENSG00000087152.11	0.0579533	0.47467	328	0.161491
PGS1_ENSG00000087157.14	0.00530653	0.117615	328	0.102644
PSMC5_ENSG00000087191.8	0.0893971	0.742737	328	0.242621
UIMC1_ENSG00000087206.12	0.132096	0.95597	328	0.469321
CETP_ENSG00000087237.6	0.00596878	0.11983	328	0.102772
MMP2_ENSG00000087245.8	0.0230929	0.178775	328	0.111358
MT3_ENSG00000087250.4	-0.0602727	0.487927	328	0.164288
LPCAT2_ENSG00000087253.7	-0.0543018	0.406615	328	0.148971
GNAO1_ENSG00000087258.9	-0.00366823	0.111023	328	0.10174
OGFOD1_ENSG00000087263.12	0.125661	0.936838	328	0.425167
SH3BP2_ENSG00000087266.11	-0.00927885	0.133932	328	0.104926
NOP14_ENSG00000087269.11	0.209332	0.999299	328	0.868599
ADD1_ENSG00000087274.12	0.148128	0.976414	328	0.551191
L2HGDH_ENSG00000087299.7	-0.0307438	0.235935	328	0.119768
TXNDC16_ENSG00000087301.4	0.0420197	0.318176	328	0.132675
C14orf166_ENSG00000087302.4	-0.079964	0.648256	328	0.206198
NID2_ENSG00000087303.12	-0.0097825	0.132497	328	0.10469
GMCL1_ENSG00000087338.4	0.0527114	0.422276	328	0.151772
SF3B2_ENSG00000087365.10	0.109396	0.858017	328	0.322368
KLHL42_ENSG00000087448.5	0.0985892	0.788924	328	0.269299
GNAS_ENSG00000087460.19	0.0222566	0.194999	328	0.11359
DNM1L_ENSG00000087470.13	0.156652	0.986805	328	0.631817
PTHLH_ENSG00000087494.11	0.0542576	0.379367	328	0.14339
PHACTR3_ENSG00000087495.12	-0.166025	0.985614	328	0.619488
ERGIC2_ENSG00000087502.13	-0.00810187	0.130116	328	0.104315
TFAP2C_ENSG00000087510.5	-0.200094	0.992859	328	0.699133
AURKA_ENSG00000087586.13	0.0313762	0.253778	328	0.122889
CASS4_ENSG00000087589.12	0.0257995	0.213759	328	0.116594
PIR_ENSG00000087842.6	0.0390034	0.289113	328	0.128243
AAMDC_ENSG00000087884.10	-0.0459015	0.361285	328	0.140231
RFX2_ENSG00000087903.8	-0.0388152	0.301177	328	0.130238
SLC6A14_ENSG00000087916.7	-0.100454	0.830121	328	0.29843
METTL2A_ENSG00000087995.11	0.0258017	0.216904	328	0.117094
SULT2B1_ENSG00000088002.7	-0.140927	0.935433	328	0.421936
ALG6_ENSG00000088035.11	0.0580284	0.479739	328	0.162488
CNOT3_ENSG00000088038.13	0.0728403	0.614464	328	0.196043
GP6_ENSG00000088053.7	-0.0521844	0.382161	328	0.144002
PTPN4_ENSG00000088179.4	-0.00895616	0.131368	328	0.104467
DDX18_ENSG00000088205.8	0.0128078	0.148786	328	0.106954
KHSRP_ENSG00000088247.11	0.14445	0.974618	328	0.541423
GNA11_ENSG00000088256.4	0.0767649	0.469154	328	0.160543
ASAP3_ENSG00000088280.14	0.0194962	0.172798	328	0.110534
EDEM2_ENSG00000088298.8	-0.0599634	0.468187	328	0.160305
DNMT3B_ENSG00000088305.14	0.154137	0.976801	328	0.553236
REM1_ENSG00000088320.3	-0.0544311	0.429229	328	0.153118
TPX2_ENSG00000088325.11	0.0684533	0.568387	328	0.183112
FER1L4_ENSG00000088340.11	-0.147677	0.969797	328	0.522864
PDRG1_ENSG00000088356.4	-0.0414004	0.327838	328	0.134143
EPB41L1_ENSG00000088367.16	-0.10388	0.780584	328	0.264703
SLC15A1_ENSG00000088386.11	-0.0362634	0.294567	328	0.128988
DOCK9_ENSG00000088387.13	-0.0929943	0.685039	328	0.21827
ANKRD10_ENSG00000088448.10	-0.0326963	0.270739	328	0.12497
TGDS_ENSG00000088451.6	0.0417847	0.308603	328	0.131024
DOCK3_ENSG00000088538.12	0.0598331	0.465563	328	0.159882
C3orf18_ENSG00000088543.10	0.102207	0.80066	328	0.276246
COQ9_ENSG00000088682.9	0.0601901	0.505218	328	0.167891
TMEM40_ENSG00000088726.11	-0.121378	0.851011	328	0.316765
KIF9_ENSG00000088727.8	0.020706	0.184599	328	0.112036
ARHGAP28_ENSG00000088756.8	0.055301	0.435598	328	0.154357
CRLS1_ENSG00000088766.7	0.0603936	0.48168	328	0.163051
PPP1R13B_ENSG00000088808.12	-0.108558	0.782945	328	0.266103
ATRN_ENSG00000088812.13	0.0271566	0.217169	328	0.117094
SMOX_ENSG00000088826.13	-0.0739303	0.61642	328	0.196503
SIGLEC1_ENSG00000088827.8	0.0341613	0.273845	328	0.125534
FKBP1A_ENSG00000088832.10	0.0613401	0.462395	328	0.159115
NSFL1C_ENSG00000088833.13	0.00529027	0.118371	328	0.102742
SLC4A11_ENSG00000088836.8	-0.131724	0.943131	328	0.435067
C20orf194_ENSG00000088854.11	0.00851989	0.125763	328	0.103776
ZNF343_ENSG00000088876.7	0.0640822	0.528284	328	0.173216
EBF4_ENSG00000088881.16	0.0409428	0.321134	328	0.132901
CPXM1_ENSG00000088882.7	0.0888773	0.738527	328	0.240273
MAVS_ENSG00000088888.13	0.0839579	0.711006	328	0.227944
LZTS3_ENSG00000088899.10	-0.0205326	0.184024	328	0.112036
F11_ENSG00000088926.9	0.0495049	0.402813	328	0.148117
XRN2_ENSG00000088930.6	0.0914696	0.746197	328	0.244797
PLK1S1_ENSG00000088970.11	-0.0426796	0.334672	328	0.135412
DYNLL1_ENSG00000088986.6	0.00841131	0.128858	328	0.104191
TESC_ENSG00000088992.13	-0.08519	0.639733	328	0.203417
SNX5_ENSG00000089006.12	0.0578202	0.482292	328	0.163051
RPL6_ENSG00000089009.11	0.122971	0.917879	328	0.389098
SIRPG_ENSG00000089012.10	-0.0725755	0.611793	328	0.195334
MAPKAPK5_ENSG00000089022.9	0.0145234	0.15289	328	0.107465
P2RX7_ENSG00000089041.12	-0.0969704	0.598833	328	0.191689
ESF1_ENSG00000089048.10	0.0309295	0.251723	328	0.122536
RBBP9_ENSG00000089050.10	0.0369483	0.270635	328	0.124957
ANAPC5_ENSG00000089053.8	0.120897	0.896393	328	0.358622
SLC23A2_ENSG00000089057.10	0.133084	0.91202	328	0.380555
SLC8B1_ENSG00000089060.7	-0.111267	0.873901	328	0.336918
TMEM230_ENSG00000089063.10	0.0711475	0.568354	328	0.183112
DZANK1_ENSG00000089091.12	0.0210563	0.186923	328	0.11227
KDM2B_ENSG00000089094.12	0.0773188	0.627969	328	0.199358
C20orf26_ENSG00000089101.13	-0.000488921	0.10151	328	0.100179
LHX5_ENSG00000089116.3	-0.0554319	0.458821	328	0.158271
TASP1_ENSG00000089123.11	-0.0930581	0.78287	328	0.266102
OAS1_ENSG00000089127.8	-0.242312	0.999943	328	0.948935
GCN1L1_ENSG00000089154.6	0.125064	0.930682	328	0.412942
RPLP0_ENSG00000089157.11	0.103654	0.83901	328	0.305475
PXN_ENSG00000089159.11	0.00847224	0.126375	328	0.103776
SIRT4_ENSG00000089163.4	0.00374488	0.112479	328	0.101861
RPH3A_ENSG00000089169.10	-0.0314062	0.264647	328	0.124272
KIF16B_ENSG00000089177.13	-0.0560627	0.445992	328	0.155789
TRMT6_ENSG00000089195.10	0.0583498	0.458694	328	0.158268
CHGB_ENSG00000089199.5	0.0773926	0.554474	328	0.179648
PEBP1_ENSG00000089220.4	0.0896711	0.757103	328	0.250639
TBX5_ENSG00000089225.15	0.111235	0.891561	328	0.354821
BRAP_ENSG00000089234.11	-0.0215775	0.194122	328	0.113383
ERP29_ENSG00000089248.6	0.010056	0.136717	328	0.1052
NOS1_ENSG00000089250.14	-0.0798555	0.665769	328	0.211179
FUS_ENSG00000089280.14	0.107487	0.865782	328	0.328714
IGBP1_ENSG00000089289.11	-0.0146742	0.156224	328	0.107998
FXYD5_ENSG00000089327.10	-0.126589	0.914547	328	0.385042
ZNF302_ENSG00000089335.16	0.00266552	0.108477	328	0.101402
GRAMD1A_ENSG00000089351.10	-0.0046674	0.114902	328	0.102287
FXYD3_ENSG00000089356.12	-0.269005	0.999646	328	0.896816
HEPH_ENSG00000089472.12	-0.0268476	0.199184	328	0.114102
CDIP1_ENSG00000089486.12	0.0629651	0.464211	328	0.159557
CMTM1_ENSG00000089505.13	0.074627	0.608178	328	0.194343
KCNH4_ENSG00000089558.4	-0.0276527	0.219707	328	0.117485
GANAB_ENSG00000089597.12	0.139546	0.955965	328	0.469321
GMIP_ENSG00000089639.6	-0.0816351	0.624965	328	0.198414
RBM41_ENSG00000089682.12	-0.0634347	0.531031	328	0.173734
BIRC5_ENSG00000089685.10	0.102929	0.81715	328	0.287756
LAG3_ENSG00000089692.4	0.210029	0.999085	328	0.858049
MLF2_ENSG00000089693.6	0.148436	0.970271	328	0.525164
OTUB2_ENSG00000089723.5	-0.0698088	0.596467	328	0.190633
DDX24_ENSG00000089737.11	-0.0186528	0.175582	328	0.110865
ZBTB25_ENSG00000089775.7	-0.093224	0.750107	328	0.247049
NECAP1_ENSG00000089818.12	0.135859	0.944369	328	0.437802
ARHGAP4_ENSG00000089820.11	0.0436517	0.320734	328	0.132885
ANKRD24_ENSG00000089847.8	0.0779773	0.656036	328	0.208542
DHX32_ENSG00000089876.7	-0.106765	0.852762	328	0.317938
RCOR1_ENSG00000089902.8	-0.0100643	0.133824	328	0.104926
GPATCH2L_ENSG00000089916.13	0.00432099	0.114193	328	0.1022
LTBP4_ENSG00000090006.13	0.0230474	0.204751	328	0.115101
BLVRB_ENSG00000090013.5	-0.0586547	0.478006	328	0.161982
SLC9A1_ENSG00000090020.6	0.0366098	0.276182	328	0.12597
SPTLC1_ENSG00000090054.9	-0.000205782	0.100628	328	0.100043
PAPOLA_ENSG00000090060.13	0.0358387	0.280296	328	0.126487
CCNK_ENSG00000090061.13	0.00602984	0.121037	328	0.103008
PCBP4_ENSG00000090097.16	0.168294	0.979314	328	0.570619
RGS1_ENSG00000090104.7	-0.0189595	0.170905	328	0.110176
YPEL3_ENSG00000090238.7	-0.096276	0.765367	328	0.255632
MRPS33_ENSG00000090263.11	-0.123934	0.91404	328	0.384147
NDUFB2_ENSG00000090266.8	-0.0496225	0.37906	328	0.143365
NUDC_ENSG00000090273.9	0.142384	0.956749	328	0.472036
MAEA_ENSG00000090316.11	0.154677	0.985596	328	0.619473
ICAM1_ENSG00000090339.4	-0.15429	0.97487	328	0.542587
STRN4_ENSG00000090372.10	0.0695843	0.560651	328	0.180839
IRAK3_ENSG00000090376.4	-0.111157	0.828354	328	0.296662
LYZ_ENSG00000090382.2	-0.138692	0.888968	328	0.351116
SI_ENSG00000090402.3	0.128367	0.945675	328	0.441628
MUL1_ENSG00000090432.5	0.015763	0.160321	328	0.108462
TFAP4_ENSG00000090447.7	0.0618354	0.499462	328	0.166844
PDCD7_ENSG00000090470.10	0.137155	0.957274	328	0.4734
SPG21_ENSG00000090487.6	0.0232824	0.205884	328	0.115404
FETUB_ENSG00000090512.7	0.0150456	0.160039	328	0.10839
DNAJB11_ENSG00000090520.6	-0.046251	0.373456	328	0.142211
LEPREL1_ENSG00000090530.5	-0.0155027	0.155075	328	0.107884
THPO_ENSG00000090534.13	0.0743857	0.601026	328	0.192432
CHRD_ENSG00000090539.11	0.0472656	0.374484	328	0.142525
FLT3LG_ENSG00000090554.8	-0.101607	0.800478	328	0.275976
RAB11FIP3_ENSG00000090565.11	0.060304	0.491613	328	0.164725
GNPTG_ENSG00000090581.5	-0.118966	0.914311	328	0.384555
ZNF268_ENSG00000090612.16	0.144028	0.955444	328	0.467833
GOLGA3_ENSG00000090615.8	0.0679408	0.565636	328	0.182221
PABPC4_ENSG00000090621.9	0.183401	0.99681	328	0.777611
CD209_ENSG00000090659.13	-0.00787103	0.122617	328	0.103197
CERS4_ENSG00000090661.7	-0.0204295	0.182647	328	0.11185
MCOLN1_ENSG00000090674.11	0.0473795	0.353763	328	0.138915
USP48_ENSG00000090686.11	0.113235	0.859117	328	0.322623
EFNB1_ENSG00000090776.5	0.0354614	0.258113	328	0.123187
PDPR_ENSG00000090857.9	0.137324	0.965234	328	0.50138
AARS_ENSG00000090861.11	0.0962419	0.81613	328	0.287355
GLG1_ENSG00000090863.7	0.103886	0.821283	328	0.290936
KIF4A_ENSG00000090889.10	0.169044	0.988145	328	0.644585
TNRC6A_ENSG00000090905.13	0.103003	0.810599	328	0.282015
FCGBP_ENSG00000090920.9	-0.0223693	0.198436	328	0.11408
PLEKHG2_ENSG00000090924.10	0.0347015	0.273713	328	0.125534
DLL3_ENSG00000090932.6	-0.00473599	0.113884	328	0.102123
NAT14_ENSG00000090971.4	0.0366882	0.26704	328	0.124717
PITPNM2_ENSG00000090975.8	0.00805365	0.127661	328	0.103942
EXOC1_ENSG00000090989.13	-0.0399473	0.316518	328	0.132523
RBM27_ENSG00000091009.6	0.126328	0.935174	328	0.421316
POU4F3_ENSG00000091010.4	0.0109071	0.142632	328	0.106038
OSBPL8_ENSG00000091039.12	0.0644484	0.516649	328	0.170452
DTX2_ENSG00000091073.15	-0.210198	0.998813	328	0.845545
NLRC4_ENSG00000091106.14	0.0771264	0.536006	328	0.174982
PUS7_ENSG00000091127.9	0.111381	0.868483	328	0.330103
LAMB4_ENSG00000091128.8	-0.0219405	0.199917	328	0.114141
NRCAM_ENSG00000091129.15	-0.0479133	0.371784	328	0.141971
LAMB1_ENSG00000091136.9	-0.106385	0.75833	328	0.251645
SLC26A4_ENSG00000091137.7	-0.0451809	0.329507	328	0.134319
SLC26A3_ENSG00000091138.8	0.074139	0.618627	328	0.19672
DLD_ENSG00000091140.8	0.0407824	0.32262	328	0.133215
WDR7_ENSG00000091157.9	0.188491	0.99279	328	0.697939
TXNL1_ENSG00000091164.8	0.186205	0.994884	328	0.736506
IL5RA_ENSG00000091181.15	-0.109213	0.861738	328	0.325106
ABCC6_ENSG00000091262.10	-0.0361757	0.280759	328	0.126487
CMTM6_ENSG00000091317.7	-0.0331405	0.265296	328	0.124416
ITGA6_ENSG00000091409.10	-0.0141445	0.143539	328	0.106221
RAPGEF4_ENSG00000091428.13	-0.00913902	0.131373	328	0.104467
MLTK_ENSG00000091436.12	0.0100015	0.135966	328	0.1052
SMPX_ENSG00000091482.5	-0.0335566	0.280415	328	0.126487
FH_ENSG00000091483.6	0.0250521	0.217874	328	0.117157
SEL1L3_ENSG00000091490.6	-0.0986442	0.763919	328	0.254945
TF_ENSG00000091513.10	0.0458146	0.339203	328	0.136174
CDV3_ENSG00000091527.11	-0.0152185	0.161561	328	0.108686
MYO15A_ENSG00000091536.12	0.0122526	0.147326	328	0.106737
ALKBH5_ENSG00000091542.8	0.0811642	0.670014	328	0.213262
APOH_ENSG00000091583.6	0.0643196	0.526289	328	0.172693
NLRP1_ENSG00000091592.11	0.0745997	0.598916	328	0.191732
PITPNM3_ENSG00000091622.11	-0.123951	0.901556	328	0.365054
SPAG7_ENSG00000091640.3	0.0259869	0.216743	328	0.117094
ORC6_ENSG00000091651.4	0.0898538	0.767577	328	0.257332
ZFHX4_ENSG00000091656.11	0.0601478	0.468035	328	0.160305
SLC17A6_ENSG00000091664.7	0.0367738	0.302601	328	0.130328
CPA1_ENSG00000091704.5	-0.0123654	0.146427	328	0.106659
ZC3HC1_ENSG00000091732.11	0.0977992	0.738078	328	0.239889
ESR1_ENSG00000091831.17	-0.101992	0.718831	328	0.231138
RGS17_ENSG00000091844.3	0.0785135	0.610779	328	0.194847
ANGPT2_ENSG00000091879.9	0.0298741	0.252862	328	0.122751
TMEM101_ENSG00000091947.5	-0.0618616	0.38577	328	0.144789
CD200_ENSG00000091972.14	-0.000862115	0.102556	328	0.100414
CCDC80_ENSG00000091986.11	0.00137543	0.104023	328	0.100743
CMA1_ENSG00000092009.6	-0.0315331	0.266637	328	0.124643
PSME1_ENSG00000092010.10	-0.202809	0.999171	328	0.860187
PPP2R3C_ENSG00000092020.6	0.039977	0.304654	328	0.130537
HAUS4_ENSG00000092036.12	-0.0178668	0.171385	328	0.110311
JPH4_ENSG00000092051.12	-0.0186719	0.171753	328	0.110341
MYH7_ENSG00000092054.12	-0.00357571	0.112396	328	0.101844
CEBPE_ENSG00000092067.5	-0.0631171	0.38394	328	0.144408
SLC7A8_ENSG00000092068.14	-0.0623084	0.50835	328	0.168589
OSGEP_ENSG00000092094.6	-0.0284932	0.2286	328	0.118889
SLC22A17_ENSG00000092096.10	0.0335956	0.255512	328	0.122913
RNF31_ENSG00000092098.12	-0.0607671	0.49998	328	0.166883
SCFD1_ENSG00000092108.16	-0.0229677	0.201028	328	0.114336
G2E3_ENSG00000092140.10	0.034088	0.255139	328	0.122907
HECTD1_ENSG00000092148.8	-0.00812709	0.128569	328	0.104103
HNRNPC_ENSG00000092199.13	0.0816943	0.692425	328	0.220945
RPGRIP1_ENSG00000092200.8	-0.106	0.824827	328	0.293825
SUPT16H_ENSG00000092201.5	0.0210496	0.184481	328	0.112036
TOX4_ENSG00000092203.9	-0.0876307	0.706999	328	0.226535
GEMIN2_ENSG00000092208.12	0.0229293	0.187556	328	0.112278
TGM1_ENSG00000092295.7	-0.156989	0.978171	328	0.563231
TINF2_ENSG00000092330.11	-0.132413	0.933406	328	0.416984
DAZL_ENSG00000092345.9	-0.0148415	0.163135	328	0.108978
TBL1Y_ENSG00000092377.9	0.0602092	0.512252	328	0.169358
SEMA6A_ENSG00000092421.12	0.0403215	0.318345	328	0.132675
TRPM7_ENSG00000092439.9	0.0907178	0.755581	328	0.249631
TYRO3_ENSG00000092445.7	0.130039	0.940115	328	0.428682
WDR76_ENSG00000092470.7	0.110968	0.860487	328	0.32361
CAPN3_ENSG00000092529.18	-0.0989856	0.59564	328	0.190235
SNAP23_ENSG00000092531.5	0.0714755	0.585272	328	0.187252
TBX15_ENSG00000092607.9	0.0310756	0.232872	328	0.119444
PHGDH_ENSG00000092621.7	0.0866791	0.724301	328	0.233613
COL9A3_ENSG00000092758.11	-0.0299081	0.236516	328	0.119866
[truncated: 46,019 more rows]

## Sheet: Merged_TC_vs_transcript_RNA
Supplementary Table S2b: Merged TC vs. transcript expression
Correlations of merged log2 z-scored CCLE WGS + GDSC WES TC and expression levels of all transcripts
	coef	P_value	Sample_size	Q_value
TSPAN6_ENST00000373020.4	-0.122099	0.807722	328	0.245014
TSPAN6_ENST00000494424.1	0.00646649	0.122236	328	0.102468
TSPAN6_ENST00000496771.1	-0.120005	0.885981	328	0.302225
TNMD_ENST00000373031.4	-0.0313667	0.264812	328	0.119707
TNMD_ENST00000485971.1	-0.0246544	0.21252	328	0.113617
DPM1_ENST00000371582.4	-0.0292334	0.243154	328	0.117147
DPM1_ENST00000371583.5	0.102499	0.865286	328	0.284689
DPM1_ENST00000371584.4	-0.0488562	0.393756	328	0.136253
DPM1_ENST00000371588.5	-0.0259605	0.22186	328	0.114692
DPM1_ENST00000413082.1	-0.0412505	0.346349	328	0.129041
DPM1_ENST00000466152.1	-0.0618326	0.533894	328	0.159669
DPM1_ENST00000494752.1	-0.00896733	0.133452	328	0.103831
SCYL3_ENST00000367770.1	-0.0442447	0.363165	328	0.131531
SCYL3_ENST00000367771.6	0.0260256	0.21116	328	0.113407
SCYL3_ENST00000367772.4	0.0172057	0.166066	328	0.107826
SCYL3_ENST00000423670.1	0.0942838	0.802729	328	0.242236
SCYL3_ENST00000470238.1	0.0537908	0.414853	328	0.139156
C1orf112_ENST00000286031.6	-0.00716974	0.125059	328	0.102786
C1orf112_ENST00000359326.4	0.0221977	0.198042	328	0.111752
C1orf112_ENST00000413811.2	-0.0498781	0.414721	328	0.139141
C1orf112_ENST00000456684.1	-0.0213027	0.196375	328	0.111516
C1orf112_ENST00000459772.1	-0.0403695	0.329398	328	0.127155
C1orf112_ENST00000466580.2	0.0396828	0.325209	328	0.126812
C1orf112_ENST00000472795.1	-0.0159351	0.166936	328	0.107943
C1orf112_ENST00000481744.1	0.0134521	0.153909	328	0.106402
C1orf112_ENST00000496973.1	0.0410867	0.329578	328	0.127164
C1orf112_ENST00000498289.1	0.0586697	0.485119	328	0.150639
FGR_ENST00000374003.3	-0.0129967	0.139011	328	0.104459
FGR_ENST00000374004.1	-0.0953099	0.689742	328	0.195223
FGR_ENST00000374005.3	-0.0284452	0.201383	328	0.112154
FGR_ENST00000399173.1	0.0400021	0.272705	328	0.12072
FGR_ENST00000457296.1	-0.0265401	0.228373	328	0.115337
FGR_ENST00000468038.1	0.0936115	0.731806	328	0.209719
FGR_ENST00000475472.1	-0.0168849	0.156731	328	0.106735
FGR_ENST00000545953.1	0.050817	0.401521	328	0.137447
CFH_ENST00000359637.2	-0.0539456	0.451641	328	0.145015
CFH_ENST00000367429.4	-0.0731122	0.603299	328	0.173168
CFH_ENST00000439155.2	-0.0745224	0.617001	328	0.176328
CFH_ENST00000466229.1	-0.0231033	0.205666	328	0.112699
CFH_ENST00000470918.1	-0.032496	0.269096	328	0.120272
CFH_ENST00000496761.1	0.00816431	0.1295	328	0.103372
FUCA2_ENST00000002165.6	0.00226143	0.107137	328	0.100728
FUCA2_ENST00000367585.1	0.0425446	0.356346	328	0.130402
FUCA2_ENST00000438118.2	0.00216086	0.106972	328	0.100724
FUCA2_ENST00000451668.1	0.0478491	0.395951	328	0.136605
GCLC_ENST00000229416.6	-0.0499862	0.383636	328	0.134675
GCLC_ENST00000504353.1	-0.0609745	0.490435	328	0.151616
GCLC_ENST00000504525.1	-0.163177	0.989561	328	0.57262
GCLC_ENST00000505197.1	-0.0896832	0.783733	328	0.23306
GCLC_ENST00000505294.1	-0.0681513	0.566178	328	0.165568
GCLC_ENST00000509541.1	-0.0429216	0.334336	328	0.127785
GCLC_ENST00000510837.1	-0.0559719	0.469798	328	0.147869
GCLC_ENST00000513939.1	-0.0568788	0.475142	328	0.148614
GCLC_ENST00000514004.1	-0.0025417	0.108156	328	0.100825
GCLC_ENST00000514373.1	-0.0350551	0.288246	328	0.122389
GCLC_ENST00000514933.1	-0.0109388	0.142219	328	0.104909
GCLC_ENST00000515580.1	-0.073339	0.603252	328	0.173148
NFYA_ENST00000341376.6	0.138922	0.962019	328	0.422454
NFYA_ENST00000353205.5	0.0214388	0.189111	328	0.110681
STPG1_ENST00000003583.8	-0.0212575	0.196295	328	0.111506
STPG1_ENST00000337248.4	0.0614442	0.507492	328	0.154673
STPG1_ENST00000374409.1	-0.0103387	0.139793	328	0.104564
STPG1_ENST00000435187.1	-0.0151366	0.162156	328	0.107341
STPG1_ENST00000438866.1	-0.0290569	0.242303	328	0.11699
STPG1_ENST00000440416.1	-0.0590781	0.513816	328	0.155891
STPG1_ENST00000468303.1	0.0121024	0.143385	328	0.104993
STPG1_ENST00000475760.1	-0.00883106	0.132655	328	0.103765
STPG1_ENST00000483261.1	-0.00365696	0.112578	328	0.101344
STPG1_ENST00000483528.1	0.0710003	0.631493	328	0.179818
STPG1_ENST00000492753.1	-0.0513683	0.435601	328	0.142446
STPG1_ENST00000497384.1	-0.0717424	0.616817	328	0.176244
STPG1_ENST00000498488.1	0.0570773	0.478771	328	0.149185
NIPAL3_ENST00000003912.3	0.0152012	0.158023	328	0.106944
NIPAL3_ENST00000339255.2	-0.0247535	0.20927	328	0.113149
NIPAL3_ENST00000358028.4	-0.039895	0.323512	328	0.126485
NIPAL3_ENST00000374399.4	0.057007	0.445629	328	0.143826
NIPAL3_ENST00000428131.1	0.0198344	0.188338	328	0.110575
NIPAL3_ENST00000432012.1	0.0104793	0.138431	328	0.104413
NIPAL3_ENST00000475663.2	0.0673169	0.572493	328	0.166844
NIPAL3_ENST00000488155.1	0.100034	0.815148	328	0.249096
LAS1L_ENST00000312391.8	-0.0347997	0.283341	328	0.121917
LAS1L_ENST00000374804.5	-0.210476	0.996884	328	0.702102
LAS1L_ENST00000374807.5	0.109149	0.887313	328	0.303365
LAS1L_ENST00000374811.3	0.235664	0.999215	328	0.807078
LAS1L_ENST00000469091.1	-0.011449	0.143533	328	0.105011
LAS1L_ENST00000484069.1	0.0906364	0.737648	328	0.212152
ENPP4_ENST00000321037.4	-0.0650644	0.48468	328	0.150519
SEMA3F_ENST00000002829.3	0.0288039	0.219386	328	0.114368
SEMA3F_ENST00000413852.1	0.0430439	0.309995	328	0.124864
SEMA3F_ENST00000414301.1	-0.0111367	0.14069	328	0.104656
SEMA3F_ENST00000420831.1	-0.0799863	0.668071	328	0.189164
SEMA3F_ENST00000426511.1	-0.00577873	0.119709	328	0.10215
SEMA3F_ENST00000434342.1	0.0211969	0.192622	328	0.110961
SEMA3F_ENST00000450338.1	0.0450541	0.33543	328	0.127935
SEMA3F_ENST00000470737.1	-0.0413061	0.30631	328	0.124577
SEMA3F_ENST00000493743.1	0.0505456	0.409933	328	0.138575
CFTR_ENST00000003084.6	-0.0484945	0.3276	328	0.127046
CFTR_ENST00000426809.1	0.109708	0.892699	328	0.307856
CFTR_ENST00000429014.1	-0.0290334	0.241776	328	0.116937
CFTR_ENST00000446805.1	-0.0641485	0.418809	328	0.139777
CFTR_ENST00000454343.1	-0.0669368	0.479277	328	0.149354
CFTR_ENST00000468795.1	-0.0205232	0.175449	328	0.108982
CFTR_ENST00000546407.1	0.0922473	0.80261	328	0.242236
CFTR_ENST00000600166.1	-0.123269	0.925805	328	0.348034
CFTR_ENST00000608965.1	-0.0848458	0.720754	328	0.205295
CFTR_ENST00000610149.1	-0.134049	0.961335	328	0.420445
ANKIB1_ENST00000265742.3	-0.0482684	0.371958	328	0.132893
ANKIB1_ENST00000413588.1	-0.0677649	0.561936	328	0.164859
ANKIB1_ENST00000422095.1	-0.0224375	0.201491	328	0.112172
ANKIB1_ENST00000439883.1	-0.0247006	0.21536	328	0.113916
ANKIB1_ENST00000442183.1	-0.0396074	0.330782	328	0.127272
ANKIB1_ENST00000465883.1	0.00646472	0.122932	328	0.102535
ANKIB1_ENST00000486698.1	-0.0536974	0.447271	328	0.144147
CYP51A1_ENST00000003100.8	-0.0128094	0.14956	328	0.105763
CYP51A1_ENST00000422867.1	0.0259018	0.224229	328	0.114883
CYP51A1_ENST00000435873.1	0.0913295	0.79794	328	0.239561
CYP51A1_ENST00000450723.1	0.0249558	0.211296	328	0.11343
CYP51A1_ENST00000482924.1	-0.00731535	0.126859	328	0.103005
KRIT1_ENST00000340022.2	-0.00321812	0.11064	328	0.101176
KRIT1_ENST00000394503.2	-0.0366126	0.29759	328	0.123547
KRIT1_ENST00000394505.2	0.0735027	0.581592	328	0.168553
KRIT1_ENST00000394507.1	0.0358122	0.280865	328	0.121594
KRIT1_ENST00000412043.2	-0.000887522	0.102859	328	0.100242
KRIT1_ENST00000413688.1	0.00110995	0.103637	328	0.100344
KRIT1_ENST00000422347.1	0.0708642	0.60639	328	0.173948
KRIT1_ENST00000425073.1	-0.0574725	0.493566	328	0.152002
KRIT1_ENST00000425919.1	0.0721361	0.620268	328	0.177056
KRIT1_ENST00000430102.1	-0.0620545	0.512731	328	0.155734
KRIT1_ENST00000433016.1	-0.0421401	0.343261	328	0.128704
KRIT1_ENST00000440209.1	0.0696265	0.594736	328	0.171344
KRIT1_ENST00000444960.1	-0.0597694	0.487884	328	0.151118
KRIT1_ENST00000445516.1	0.0556817	0.476939	328	0.148959
KRIT1_ENST00000452773.1	-0.0600036	0.503478	328	0.153782
KRIT1_ENST00000454017.1	0.0275654	0.232981	328	0.115767
KRIT1_ENST00000458493.1	-0.0466695	0.377217	328	0.133594
KRIT1_ENST00000466166.1	-0.0165319	0.170518	328	0.108427
KRIT1_ENST00000470309.1	-0.0214466	0.194453	328	0.111224
KRIT1_ENST00000475770.1	-0.119019	0.910876	328	0.327517
KRIT1_ENST00000486261.1	-0.0597956	0.500489	328	0.153426
KRIT1_ENST00000487168.1	0.0267849	0.227063	328	0.11517
KRIT1_ENST00000489087.1	0.0188397	0.179451	328	0.109512
RAD52_ENST00000228345.5	0.0894104	0.752613	328	0.218381
RAD52_ENST00000358495.3	0.111829	0.894957	328	0.310398
RAD52_ENST00000397230.2	-0.0450185	0.354637	328	0.13026
RAD52_ENST00000430095.2	0.118454	0.91498	328	0.332461
RAD52_ENST00000461568.1	0.137608	0.961334	328	0.420445
RAD52_ENST00000463750.1	0.137455	0.960983	328	0.419122
RAD52_ENST00000468231.1	0.0921746	0.796491	328	0.238898
RAD52_ENST00000481052.1	0.0794548	0.687599	328	0.194519
RAD52_ENST00000488642.2	0.0801695	0.693111	328	0.196217
RAD52_ENST00000535376.1	0.0407084	0.341468	328	0.128504
RAD52_ENST00000536177.1	0.0958756	0.819074	328	0.251319
RAD52_ENST00000539046.1	0.018149	0.179711	328	0.109548
RAD52_ENST00000541619.1	0.145166	0.97885	328	0.492266
RAD52_ENST00000542297.1	0.122571	0.933589	328	0.361083
RAD52_ENST00000542584.1	0.0959375	0.815706	328	0.249369
RAD52_ENST00000542785.1	0.12417	0.924902	328	0.346583
RAD52_ENST00000543912.1	0.0825158	0.718948	328	0.204539
RAD52_ENST00000544742.1	-0.00756067	0.12762	328	0.103118
RAD52_ENST00000545564.1	0.0489868	0.417635	328	0.139595
RAD52_ENST00000545967.1	-0.0458332	0.365473	328	0.131886
MYH16_ENST00000330888.2	0.0309225	0.256062	328	0.11864
MYH16_ENST00000413734.1	-0.0252937	0.223923	328	0.11487
MYH16_ENST00000425880.1	-0.0134755	0.155971	328	0.106681
MYH16_ENST00000429079.1	-0.0302495	0.25087	328	0.118059
MYH16_ENST00000439784.1	-0.00893883	0.133316	328	0.103829
MYH16_ENST00000452010.1	0.0147392	0.159172	328	0.107023
MYH16_ENST00000453194.1	-0.124695	0.90922	328	0.325538
MYH16_ENST00000453378.1	0.043224	0.352511	328	0.129994
BAD_ENST00000309032.3	0.00308201	0.10978	328	0.10104
BAD_ENST00000394531.3	-0.0874243	0.740042	328	0.213094
BAD_ENST00000394532.3	-0.119607	0.892849	328	0.307952
BAD_ENST00000492141.1	0.0328955	0.273756	328	0.120804
BAD_ENST00000493798.1	0.018541	0.180681	328	0.109622
BAD_ENST00000544271.1	0.0469502	0.370434	328	0.132777
BAD_ENST00000544785.1	0.000511702	0.101673	328	0.100174
LAP3_ENST00000226299.4	0.187575	0.997448	328	0.717516
LAP3_ENST00000503467.1	-0.110445	0.879535	328	0.297
LAP3_ENST00000504614.1	0.107006	0.866409	328	0.28527
LAP3_ENST00000507960.1	-0.0272973	0.234505	328	0.115928
LAP3_ENST00000508014.1	-0.144013	0.970473	328	0.453562
LAP3_ENST00000508497.1	-0.0736296	0.626586	328	0.178392
LAP3_ENST00000509583.1	-0.010544	0.139544	328	0.104554
LAP3_ENST00000512397.1	0.0622633	0.522658	328	0.157582
LAP3_ENST00000513105.1	-0.00698649	0.125188	328	0.1028
LAP3_ENST00000606142.1	0.0283125	0.239079	328	0.116576
CD99_ENST00000381177.1	-0.0951388	0.802661	328	0.242236
CD99_ENST00000381180.3	-0.0883676	0.770158	328	0.226864
CD99_ENST00000381184.1	-0.0739386	0.581823	328	0.168557
CD99_ENST00000381187.3	-0.0352514	0.271821	328	0.120622
CD99_ENST00000381192.3	-0.028799	0.233909	328	0.115846
CD99_ENST00000449611.1	0.0602903	0.482377	328	0.150026
CD99_ENST00000482293.1	-0.00703188	0.125425	328	0.102821
CD99_ENST00000482405.2	-0.125257	0.92656	328	0.349313
CD99_ENST00000497752.1	-0.0287472	0.236921	328	0.116251
HS3ST1_ENST00000002596.5	-0.181665	0.989508	328	0.57262
HS3ST1_ENST00000510712.1	-0.173899	0.993785	328	0.631346
HS3ST1_ENST00000514690.1	-0.0451385	0.351999	328	0.129994
AOC1_ENST00000360937.4	-0.133846	0.922197	328	0.341775
AOC1_ENST00000416793.2	-0.138693	0.941279	328	0.373435
AOC1_ENST00000460213.1	0.0151759	0.157187	328	0.106821
AOC1_ENST00000467291.1	0.0318614	0.254751	328	0.118575
AOC1_ENST00000480582.1	-0.105358	0.844009	328	0.267907
AOC1_ENST00000483043.1	-0.0620825	0.529562	328	0.158727
AOC1_ENST00000493429.1	-0.0350982	0.293897	328	0.123009
WNT16_ENST00000222462.2	0.0545056	0.461221	328	0.146512
WNT16_ENST00000361301.2	-0.0176393	0.176527	328	0.109115
HECW1_ENST00000395891.2	0.00958565	0.13504	328	0.103952
HECW1_ENST00000429529.1	-0.0730626	0.656439	328	0.185977
HECW1_ENST00000453890.1	0.0145061	0.155722	328	0.10668
HECW1_ENST00000461842.1	0.00276723	0.108901	328	0.100928
HECW1_ENST00000464944.1	-0.0294237	0.239161	328	0.116576
HECW1_ENST00000471043.1	0.0022201	0.107089	328	0.100728
HECW1_ENST00000471527.1	-0.0191009	0.184641	328	0.110077
HECW1_ENST00000481031.1	-0.0678097	0.549915	328	0.162607
HECW1_ENST00000490954.2	0.0658137	0.584044	328	0.16897
HECW1_ENST00000492310.1	0.0385319	0.326901	328	0.127007
HECW1_ENST00000493057.1	-0.0564038	0.45413	328	0.145334
MAD1L1_ENST00000265854.7	0.0718489	0.591188	328	0.170776
MAD1L1_ENST00000399654.2	0.112387	0.868826	328	0.287041
MAD1L1_ENST00000402746.1	0.062938	0.550819	328	0.162768
MAD1L1_ENST00000406869.1	0.155064	0.978792	328	0.491938
MAD1L1_ENST00000421113.1	-0.0352108	0.256639	328	0.118698
MAD1L1_ENST00000429625.1	-0.0488629	0.406466	328	0.138153
MAD1L1_ENST00000437877.1	-0.0563443	0.369228	328	0.132577
MAD1L1_ENST00000438959.1	0.0512465	0.393719	328	0.136246
MAD1L1_ENST00000444373.2	0.154379	0.985859	328	0.54027
MAD1L1_ENST00000445959.1	0.0687901	0.607211	328	0.174119
MAD1L1_ENST00000450235.1	-0.0119956	0.140414	328	0.104656
MAD1L1_ENST00000455998.1	0.115536	0.8934	328	0.308556
MAD1L1_ENST00000459731.1	0.0344545	0.280614	328	0.12158
MAD1L1_ENST00000464742.1	0.0323287	0.262719	328	0.119492
MAD1L1_ENST00000468372.1	-0.0398758	0.292873	328	0.12286
MAD1L1_ENST00000469871.1	0.0230475	0.209753	328	0.113201
MAD1L1_ENST00000477172.1	0.0609713	0.45008	328	0.14467
MAD1L1_ENST00000481633.1	-0.0101891	0.1394	328	0.104536
MAD1L1_ENST00000483165.1	0.0460136	0.383847	328	0.134705
MAD1L1_ENST00000486340.1	-0.0371609	0.310014	328	0.124864
MAD1L1_ENST00000491858.1	0.144673	0.97798	328	0.487115
MAD1L1_ENST00000496548.1	-0.0128783	0.151043	328	0.105941
LASP1_ENST00000318008.6	-0.0324518	0.265028	328	0.119721
LASP1_ENST00000419929.1	0.0717525	0.609844	328	0.174545
LASP1_ENST00000433206.2	0.0394052	0.32096	328	0.126136
LASP1_ENST00000435347.3	-0.112104	0.871609	328	0.289485
LASP1_ENST00000443937.3	-0.0927339	0.76714	328	0.225565
LASP1_ENST00000579123.1	-0.0580442	0.466151	328	0.147258
LASP1_ENST00000581485.1	-0.0643672	0.555737	328	0.163741
LASP1_ENST00000584106.1	-0.0111982	0.143002	328	0.10497
LASP1_ENST00000585841.1	0.0394052	0.32096	328	0.126136
SNX11_ENST00000359238.2	0.0460341	0.382918	328	0.134545
SNX11_ENST00000393405.2	0.0393821	0.322634	328	0.126393
SNX11_ENST00000439357.2	-0.0746341	0.655296	328	0.185634
SNX11_ENST00000452859.2	0.0142207	0.157879	328	0.106939
SNX11_ENST00000577310.1	0.0877186	0.742572	328	0.214367
SNX11_ENST00000578861.1	0.0953854	0.816102	328	0.249543
SNX11_ENST00000580219.1	0.000697743	0.102328	328	0.100213
SNX11_ENST00000580875.1	0.0819662	0.703141	328	0.199852
SNX11_ENST00000581298.1	0.00598395	0.121141	328	0.102317
SNX11_ENST00000581705.1	-0.0746341	0.655296	328	0.185634
SNX11_ENST00000582104.1	0.077693	0.664585	328	0.188129
SNX11_ENST00000582481.1	-0.0540192	0.450092	328	0.14467
SNX11_ENST00000583320.1	-0.030276	0.255487	328	0.118575
SNX11_ENST00000584335.1	0.000604527	0.101973	328	0.100177
TMEM176A_ENST00000004103.3	-0.0634461	0.532772	328	0.159398
TMEM176A_ENST00000461345.1	-0.0179934	0.177539	328	0.109274
TMEM176A_ENST00000462826.1	-0.0382112	0.314086	328	0.125341
TMEM176A_ENST00000468689.1	0.0355784	0.296439	328	0.123438
TMEM176A_ENST00000474166.1	-0.0635479	0.543823	328	0.161497
TMEM176A_ENST00000475007.1	0.00289417	0.109747	328	0.101037
TMEM176A_ENST00000475536.1	-0.0765162	0.664138	328	0.188094
TMEM176A_ENST00000475710.1	-0.0116502	0.145012	328	0.105238
TMEM176A_ENST00000481305.1	0.0126861	0.14921	328	0.105734
TMEM176A_ENST00000484928.1	-0.0654169	0.55249	328	0.163176
TMEM176A_ENST00000494349.1	-0.0119816	0.146748	328	0.105499
M6PR_ENST00000000412.3	0.106287	0.846367	328	0.269432
M6PR_ENST00000537621.1	0.0648456	0.498625	328	0.153129
M6PR_ENST00000539143.1	0.0521343	0.431712	328	0.141814
M6PR_ENST00000540837.1	0.117014	0.891407	328	0.306786
M6PR_ENST00000541507.1	0.0183885	0.174956	328	0.10892
M6PR_ENST00000543159.1	0.102687	0.828404	328	0.256896
M6PR_ENST00000543258.1	-0.0641268	0.533043	328	0.159422
M6PR_ENST00000543704.1	-0.060484	0.522326	328	0.157512
M6PR_ENST00000543834.1	0.045963	0.361367	328	0.131255
M6PR_ENST00000543845.1	0.0989778	0.825544	328	0.255068
M6PR_ENST00000544193.1	0.116164	0.907106	328	0.323069
M6PR_ENST00000544245.1	0.107632	0.864741	328	0.284381
KLHL13_ENST00000262820.3	-0.0472001	0.400248	328	0.137275
KLHL13_ENST00000371876.1	0.0297943	0.227464	328	0.115212
KLHL13_ENST00000371878.1	-0.0594602	0.517027	328	0.15669
KLHL13_ENST00000371882.1	-0.0164443	0.163105	328	0.107435
KLHL13_ENST00000447671.2	-0.0472001	0.400248	328	0.137275
KLHL13_ENST00000453826.1	0.018246	0.178179	328	0.109368
KLHL13_ENST00000469946.1	0.019469	0.184749	328	0.110099
KLHL13_ENST00000539496.1	0.00318043	0.110581	328	0.101175
KLHL13_ENST00000540167.1	-0.00390418	0.11297	328	0.101369
KLHL13_ENST00000541812.1	0.00146608	0.104699	328	0.10048
KLHL13_ENST00000545703.1	0.0318233	0.264871	328	0.119707
CYP26B1_ENST00000001146.2	0.0503399	0.411633	328	0.138799
CYP26B1_ENST00000412253.1	0.0406752	0.325476	328	0.126823
CYP26B1_ENST00000461519.1	0.0456004	0.367701	328	0.132254
CYP26B1_ENST00000474509.1	0.0276042	0.227569	328	0.115223
CYP26B1_ENST00000546307.1	-0.00370026	0.112948	328	0.101369
ICA1_ENST00000265577.7	-0.0739323	0.569878	328	0.166463
ICA1_ENST00000317367.5	-0.0530101	0.447869	328	0.144234
ICA1_ENST00000339809.6	-0.144932	0.969566	328	0.449038
ICA1_ENST00000396675.3	-0.00617465	0.12158	328	0.102376
ICA1_ENST00000401396.1	-0.114454	0.895711	328	0.311069
ICA1_ENST00000402384.3	-0.0475972	0.369427	328	0.132593
ICA1_ENST00000406470.2	-0.0869482	0.646355	328	0.183446
ICA1_ENST00000407906.1	-0.136365	0.936902	328	0.364884
ICA1_ENST00000422063.2	-0.00320221	0.110165	328	0.101086
ICA1_ENST00000430867.1	-0.127459	0.919749	328	0.33783
ICA1_ENST00000446305.1	-0.106375	0.799489	328	0.240643
ICA1_ENST00000447326.1	-0.0787782	0.63259	328	0.180047
ICA1_ENST00000455539.1	-0.0956712	0.749495	328	0.217458
ICA1_ENST00000457755.1	-0.0711267	0.616315	328	0.176177
ICA1_ENST00000470696.1	-0.0935	0.744964	328	0.215466
ICA1_ENST00000476942.1	-0.104209	0.85999	328	0.280831
ICA1_ENST00000486677.1	-0.0988736	0.763585	328	0.223523
ICA1_ENST00000490041.1	-0.0888841	0.708639	328	0.201373
DBNDD1_ENST00000002501.6	0.0523508	0.358331	328	0.130689
DBNDD1_ENST00000304733.3	0.0908474	0.789883	328	0.235962
DBNDD1_ENST00000392973.3	0.00523896	0.116481	328	0.101817
DBNDD1_ENST00000568330.2	0.00145398	0.104897	328	0.100486
DBNDD1_ENST00000568662.1	-0.052157	0.399354	328	0.137191
DBNDD1_ENST00000568838.1	0.0877675	0.697476	328	0.19797
ALS2_ENST00000264276.6	0.0411025	0.311456	328	0.125054
ALS2_ENST00000409632.2	0.0606428	0.526597	328	0.158365
ALS2_ENST00000410052.1	-0.100411	0.848016	328	0.2711
ALS2_ENST00000439495.1	0.0365947	0.297879	328	0.12362
ALS2_ENST00000457679.2	0.0365947	0.297879	328	0.12362
ALS2_ENST00000462747.1	-0.0279668	0.237533	328	0.116319
ALS2_ENST00000467448.1	0.00288755	0.109308	328	0.100987
ALS2_ENST00000482789.1	0.018761	0.178518	328	0.10939
ALS2_ENST00000482891.1	-0.0116219	0.142862	328	0.10496
ALS2_ENST00000483703.1	0.12089	0.933597	328	0.361083
ALS2_ENST00000489440.1	-0.0302701	0.247995	328	0.117697
ALS2_ENST00000494017.1	-0.034017	0.282241	328	0.121756
ALS2_ENST00000496244.1	0.0194796	0.18456	328	0.110076
CASP10_ENST00000272879.5	-0.115976	0.86939	328	0.287464
CASP10_ENST00000286186.6	-0.156067	0.966132	328	0.435432
CASP10_ENST00000313728.7	-0.0386903	0.310003	328	0.124864
CASP10_ENST00000346817.5	-0.0972285	0.749158	328	0.217342
CASP10_ENST00000360132.3	-0.0851958	0.632452	328	0.180013
CASP10_ENST00000374650.3	-0.0192151	0.176669	328	0.109147
CASP10_ENST00000438843.1	0.0166319	0.16547	328	0.107787
CASP10_ENST00000448480.1	0.0533905	0.461896	328	0.146591
CASP10_ENST00000460140.1	0.0385191	0.286759	328	0.122298
CASP10_ENST00000471191.1	0.0109578	0.142259	328	0.104909
CASP10_ENST00000484926.1	-0.00370129	0.113043	328	0.101369
CASP10_ENST00000485408.1	0.0360817	0.290461	328	0.122726
CASP10_ENST00000492363.1	0.00327972	0.111434	328	0.101267
CFLAR_ENST00000309955.3	-0.0312532	0.251388	328	0.118127
CFLAR_ENST00000340870.5	0.0615544	0.527067	328	0.158433
CFLAR_ENST00000341222.6	-0.0403276	0.316974	328	0.125728
CFLAR_ENST00000341582.6	-0.0196831	0.184647	328	0.11008
CFLAR_ENST00000342795.5	0.0437692	0.358696	328	0.130727
CFLAR_ENST00000355558.4	-0.0546865	0.469387	328	0.14781
CFLAR_ENST00000395148.2	-0.0850702	0.700166	328	0.198717
CFLAR_ENST00000417748.1	-0.0770001	0.642962	328	0.18248
CFLAR_ENST00000423241.2	-0.0321405	0.253288	328	0.118422
CFLAR_ENST00000425030.1	-0.0506329	0.403725	328	0.137765
CFLAR_ENST00000433445.1	0.0212716	0.198134	328	0.111762
CFLAR_ENST00000439154.2	-0.0740082	0.562081	328	0.16486
CFLAR_ENST00000440180.1	-0.151566	0.969805	328	0.450057
CFLAR_ENST00000441224.1	0.0239377	0.210036	328	0.113264
CFLAR_ENST00000443227.1	0.0492968	0.401445	328	0.137436
CFLAR_ENST00000457277.1	0.00652228	0.123021	328	0.102541
CFLAR_ENST00000460961.1	-0.0321183	0.263339	328	0.119546
CFLAR_ENST00000461422.1	0.0105432	0.139624	328	0.104554
CFLAR_ENST00000461820.1	-0.0554537	0.476961	328	0.148959
CFLAR_ENST00000462763.1	-0.136127	0.964265	328	0.429454
CFLAR_ENST00000470178.2	-0.154313	0.9828	328	0.514388
CFLAR_ENST00000470664.1	-0.0921669	0.781241	328	0.232035
CFLAR_ENST00000474842.1	-0.0727361	0.620195	328	0.177029
CFLAR_ENST00000479953.2	0.0463383	0.395205	328	0.136512
CFLAR_ENST00000490965.1	0.00198157	0.106008	328	0.100597
CFLAR_ENST00000494258.1	-0.0239444	0.207046	328	0.112909
TFPI_ENST00000233156.3	-0.0504787	0.402901	328	0.137655
TFPI_ENST00000339091.4	0.00223201	0.107277	328	0.10073
TFPI_ENST00000392365.1	0.0242493	0.202566	328	0.112317
TFPI_ENST00000409676.1	0.0444774	0.347813	328	0.12932
TFPI_ENST00000417013.1	-0.0634761	0.521531	328	0.157464
TFPI_ENST00000420747.1	-0.017625	0.171068	328	0.108469
TFPI_ENST00000421427.1	0.041765	0.337689	328	0.128178
TFPI_ENST00000426055.1	0.0184369	0.171702	328	0.108566
TFPI_ENST00000435414.1	0.0241803	0.215986	328	0.11398
TFPI_ENST00000437725.1	-0.0535082	0.445202	328	0.143795
TFPI_ENST00000453013.1	0.00596851	0.119443	328	0.102131
TFPI_ENST00000481132.1	-0.0276836	0.226083	328	0.115012
TFPI_ENST00000481389.1	-0.0135622	0.153412	328	0.106321
NDUFAF7_ENST00000002125.4	0.0248451	0.208039	328	0.112983
NDUFAF7_ENST00000336237.6	-0.0937736	0.804548	328	0.243353
NDUFAF7_ENST00000416653.1	0.043619	0.368517	328	0.132451
NDUFAF7_ENST00000419278.2	-0.000678371	0.102244	328	0.100199
NDUFAF7_ENST00000431821.1	-0.0569093	0.484905	328	0.150577
NDUFAF7_ENST00000432075.1	0.0306364	0.250915	328	0.118077
NDUFAF7_ENST00000439218.1	-0.132078	0.96342	328	0.426141
NDUFAF7_ENST00000441905.1	0.115503	0.896009	328	0.311398
NDUFAF7_ENST00000455230.1	0.0408416	0.324295	328	0.126625
NDUFAF7_ENST00000469831.1	-0.00667409	0.123694	328	0.1026
NDUFAF7_ENST00000474154.1	0.0980311	0.802731	328	0.242236
NDUFAF7_ENST00000474257.1	0.131355	0.946323	328	0.383652
NDUFAF7_ENST00000483999.1	0.0465311	0.393314	328	0.136195
RBM5_ENST00000347869.3	0.165835	0.988099	328	0.558963
RBM5_ENST00000395174.2	0.148023	0.966369	328	0.436426
RBM5_ENST00000404526.2	0.0100692	0.137918	328	0.104338
RBM5_ENST00000417905.1	-0.0157685	0.164983	328	0.107712
RBM5_ENST00000433556.2	-0.01915	0.184517	328	0.110076
RBM5_ENST00000437500.1	0.0391273	0.327115	328	0.127017
RBM5_ENST00000438369.1	-0.126308	0.936122	328	0.363909
RBM5_ENST00000441305.1	-0.0556827	0.468971	328	0.147758
RBM5_ENST00000441812.2	0.00916727	0.134119	328	0.103866
RBM5_ENST00000461242.1	0.0374125	0.313114	328	0.125222
RBM5_ENST00000462025.1	0.0267022	0.224456	328	0.114916
RBM5_ENST00000464087.2	0.106355	0.851183	328	0.27352
RBM5_ENST00000464988.1	0.0202315	0.181528	328	0.109707
RBM5_ENST00000469838.1	0.129599	0.939171	328	0.36869
RBM5_ENST00000471995.1	0.126943	0.932752	328	0.359198
RBM5_ENST00000474470.1	0.0065896	0.123947	328	0.102643
RBM5_ENST00000474818.1	0.0709766	0.603535	328	0.173216
RBM5_ENST00000475128.1	0.132549	0.948823	328	0.389981
RBM5_ENST00000475590.1	0.0808524	0.674317	328	0.190924
RBM5_ENST00000479275.1	0.0737364	0.617337	328	0.176387
RBM5_ENST00000489437.1	0.0973345	0.801446	328	0.241548
RBM5_ENST00000492430.1	-0.087219	0.742509	328	0.214365
RBM5_ENST00000492472.1	0.145282	0.975431	328	0.474912
RBM5_ENST00000493993.1	0.0231593	0.207517	328	0.112919
RBM5_ENST00000494360.1	0.107414	0.860655	328	0.28117
RBM5_ENST00000496179.1	0.102	0.824931	328	0.254654
MTMR7_ENST00000180173.5	-0.0308623	0.237338	328	0.116313
MTMR7_ENST00000398099.3	0.0172777	0.16889	328	0.108148
MTMR7_ENST00000517317.1	-0.0424845	0.346005	328	0.129014
MTMR7_ENST00000518272.1	-0.126913	0.914291	328	0.331544
MTMR7_ENST00000519122.1	-0.0229557	0.201815	328	0.112212
MTMR7_ENST00000519590.1	0.00474057	0.116097	328	0.101744
MTMR7_ENST00000519763.1	-0.0339146	0.289921	328	0.122666
MTMR7_ENST00000521177.1	-0.0435448	0.338063	328	0.128219
MTMR7_ENST00000521857.1	-0.034402	0.265286	328	0.119779
MTMR7_ENST00000523571.1	-0.037379	0.299289	328	0.123786
SLC7A2_ENST00000004531.10	0.0201552	0.190074	328	0.110722
SLC7A2_ENST00000398090.3	0.128715	0.947042	328	0.385653
SLC7A2_ENST00000470360.1	0.0159473	0.167903	328	0.108076
SLC7A2_ENST00000494857.1	0.0574498	0.47858	328	0.149146
SLC7A2_ENST00000522656.1	0.0889876	0.762051	328	0.222924
ARF5_ENST00000000233.5	-0.0429077	0.332895	328	0.127611
ARF5_ENST00000415666.1	0.0300166	0.247109	328	0.117596
ARF5_ENST00000459680.1	-0.0261343	0.223184	328	0.114848
ARF5_ENST00000463733.1	-0.132844	0.941323	328	0.373444
ARF5_ENST00000467281.1	-0.0679069	0.566871	328	0.165694
ARF5_ENST00000489673.1	-0.0902977	0.710673	328	0.202093
SARM1_ENST00000003834.5	0.00181618	0.105534	328	0.100546
SARM1_ENST00000379061.4	0.0874846	0.724974	328	0.206952
SARM1_ENST00000457710.3	0.00812886	0.125982	328	0.102931
SARM1_ENST00000577870.1	0.00390855	0.112792	328	0.101369
SARM1_ENST00000578128.1	0.029666	0.243834	328	0.117257
SARM1_ENST00000579593.1	-0.0160005	0.165236	328	0.107739
SARM1_ENST00000580711.1	-0.0378883	0.291669	328	0.122738
SARM1_ENST00000582323.1	0.0678897	0.5647	328	0.165246
POLDIP2_ENST00000003607.4	0.0386431	0.309484	328	0.124825
POLDIP2_ENST00000540200.1	0.0339338	0.280943	328	0.121616
PLXND1_ENST00000324093.4	0.0683466	0.523017	328	0.157646
PLXND1_ENST00000393239.1	-0.0101375	0.13582	328	0.104095
PLXND1_ENST00000501038.2	-0.0117825	0.141572	328	0.104806
PLXND1_ENST00000503166.1	-0.0450583	0.354731	328	0.13026
PLXND1_ENST00000504524.1	0.0253368	0.203527	328	0.112465
PLXND1_ENST00000504689.1	-0.00760826	0.127857	328	0.103159
PLXND1_ENST00000504767.1	0.0524734	0.410088	328	0.138598
PLXND1_ENST00000504979.1	-0.00785836	0.126619	328	0.102983
PLXND1_ENST00000505237.2	0.0254908	0.217953	328	0.114189
PLXND1_ENST00000505505.1	0.0682557	0.422413	328	0.140438
PLXND1_ENST00000505665.1	0.0803602	0.704864	328	0.200333
PLXND1_ENST00000506979.1	0.0421585	0.318697	328	0.125928
PLXND1_ENST00000508630.1	0.021567	0.185374	328	0.110162
PLXND1_ENST00000511018.1	0.03407	0.272454	328	0.120707
PLXND1_ENST00000512744.1	0.0126767	0.14547	328	0.105307
PLXND1_ENST00000512807.1	0.0020164	0.10612	328	0.100626
PLXND1_ENST00000514990.1	0.078374	0.607985	328	0.174255
PLXND1_ENST00000515191.1	-0.00764857	0.126495	328	0.102975
AK2_ENST00000354858.6	0.0134806	0.153434	328	0.106325
AK2_ENST00000373449.2	0.0223556	0.186169	328	0.110322
AK2_ENST00000466029.1	0.00429736	0.115236	328	0.10167
AK2_ENST00000467905.1	-0.0352288	0.294048	328	0.123032
AK2_ENST00000469238.1	-0.0315175	0.259035	328	0.119012
AK2_ENST00000480134.1	-0.118488	0.89888	328	0.314026
AK2_ENST00000482191.1	0.0215272	0.192843	328	0.110992
AK2_ENST00000487289.1	0.0620895	0.494378	328	0.152189
AK2_ENST00000491241.1	0.0120631	0.14679	328	0.105513
AK2_ENST00000548033.1	-0.102879	0.838999	328	0.264556
AK2_ENST00000548559.1	-0.0754067	0.634995	328	0.18069
AK2_ENST00000550338.1	0.0141135	0.153908	328	0.106402
AK2_ENST00000551979.1	-0.0175462	0.173767	328	0.108779
CD38_ENST00000226279.3	-0.037183	0.250049	328	0.117963
CD38_ENST00000502843.1	-0.0487627	0.364485	328	0.131753
CD38_ENST00000506191.1	0.0284418	0.224026	328	0.114874
CD38_ENST00000510674.1	-0.017639	0.16848	328	0.108136
CD38_ENST00000511430.1	-0.0228803	0.178981	328	0.109453
FKBP4_ENST00000001008.4	0.134075	0.934563	328	0.362366
FKBP4_ENST00000538622.1	0.0800827	0.628943	328	0.179176
FKBP4_ENST00000539181.1	-0.0152574	0.160951	328	0.107206
FKBP4_ENST00000540260.1	0.069248	0.534283	328	0.159773
FKBP4_ENST00000543037.1	0.0797394	0.636667	328	0.180984
FKBP4_ENST00000543769.1	0.0562935	0.444305	328	0.143756
FKBP4_ENST00000544366.1	0.0783861	0.661251	328	0.18714
KDM1A_ENST00000356634.3	0.106818	0.843587	328	0.267713
KDM1A_ENST00000400181.4	0.0285353	0.231775	328	0.115651
KDM1A_ENST00000465864.1	0.0811795	0.697876	328	0.198022
KDM1A_ENST00000481879.1	0.0674866	0.582744	328	0.168638
KDM1A_ENST00000494920.1	0.0450285	0.378535	328	0.133851
KDM1A_ENST00000542151.1	0.0574546	0.475413	328	0.14867
KDM1A_ENST00000602503.1	0.0376519	0.294397	328	0.123065
RBM6_ENST00000266022.4	0.169624	0.990396	328	0.581836
RBM6_ENST00000419610.1	-0.0262803	0.229021	328	0.115417
RBM6_ENST00000421682.1	0.0157603	0.162989	328	0.10743
RBM6_ENST00000422955.1	0.0274226	0.228954	328	0.115403
RBM6_ENST00000425608.1	0.072522	0.61467	328	0.175666
RBM6_ENST00000433811.1	0.0846616	0.719356	328	0.204649
RBM6_ENST00000434592.1	0.0598122	0.516708	328	0.156616
RBM6_ENST00000438912.1	0.00998929	0.138	328	0.104342
RBM6_ENST00000441115.1	0.0996076	0.82897	328	0.257405
RBM6_ENST00000442092.1	0.173684	0.992866	328	0.617959
RBM6_ENST00000443081.1	0.102412	0.855205	328	0.277475
RBM6_ENST00000446471.1	0.0221621	0.196322	328	0.111506
RBM6_ENST00000454079.1	0.0316601	0.257867	328	0.11889
RBM6_ENST00000464013.1	0.0131318	0.152663	328	0.106188
RBM6_ENST00000466247.1	0.066421	0.543922	328	0.161527
RBM6_ENST00000478026.1	0.114372	0.895829	328	0.311132
RBM6_ENST00000483350.1	0.0929866	0.765595	328	0.224722
RBM6_ENST00000488807.2	0.0317858	0.265069	328	0.119728
RBM6_ENST00000491874.1	-0.020181	0.191672	328	0.110891
RBM6_ENST00000493652.1	0.0836943	0.706472	328	0.200775
RBM6_ENST00000539992.1	-0.0262803	0.229021	328	0.115417
CAMKK1_ENST00000158166.5	0.0208379	0.191837	328	0.110903
CAMKK1_ENST00000348335.2	0.0447016	0.349671	328	0.129595
CAMKK1_ENST00000381769.2	-0.0549916	0.452725	328	0.14523
CAMKK1_ENST00000381771.2	0.0569793	0.471285	328	0.1481
CAMKK1_ENST00000573483.1	0.0195627	0.18244	328	0.109866
RECQL_ENST00000314748.6	0.077452	0.64328	328	0.182553
RECQL_ENST00000396093.3	0.0957798	0.794	328	0.237696
RECQL_ENST00000421138.2	0.0921788	0.76049	328	0.222125
RECQL_ENST00000444129.2	0.0706971	0.56249	328	0.164919
RECQL_ENST00000536240.1	0.0885375	0.748198	328	0.216935
RECQL_ENST00000536964.1	0.145738	0.967861	328	0.441822
RECQL_ENST00000539672.1	0.109097	0.86491	328	0.284446
RECQL_ENST00000542432.1	0.123524	0.93151	328	0.35703
CCDC132_ENST00000251739.5	-0.104942	0.859006	328	0.280202
CCDC132_ENST00000305866.5	-0.101656	0.82042	328	0.252125
CCDC132_ENST00000317751.6	0.104332	0.868029	328	0.286137
CCDC132_ENST00000436177.1	-0.177905	0.995566	328	0.668753
CCDC132_ENST00000438395.1	0.0212967	0.197787	328	0.111707
CCDC132_ENST00000441602.1	-0.0750476	0.658611	328	0.186437
CCDC132_ENST00000443443.1	-0.124436	0.932652	328	0.359095
CCDC132_ENST00000458530.1	-0.0271022	0.230696	328	0.115574
CCDC132_ENST00000458707.1	-0.00160554	0.105347	328	0.100534
CCDC132_ENST00000467326.1	-0.0154788	0.164264	328	0.107583
CCDC132_ENST00000471188.1	-0.0329982	0.275144	328	0.12102
CCDC132_ENST00000474412.1	0.00596513	0.121155	328	0.102318
CCDC132_ENST00000476413.1	-0.117618	0.919672	328	0.337718
CCDC132_ENST00000477572.1	-0.0378374	0.318744	328	0.125928
CCDC132_ENST00000477935.1	0.00355461	0.112395	328	0.101337
CCDC132_ENST00000480943.1	0.0794408	0.693035	328	0.196192
CCDC132_ENST00000484954.1	-0.0193779	0.184524	328	0.110076
CCDC132_ENST00000485140.1	-0.0694117	0.600679	328	0.172727
CCDC132_ENST00000485994.1	0.0400869	0.329488	328	0.127159
CCDC132_ENST00000495039.1	0.030274	0.255614	328	0.118609
CCDC132_ENST00000535481.1	-0.0528379	0.445635	328	0.143826
CCDC132_ENST00000541136.1	-0.0750476	0.658611	328	0.186437
CCDC132_ENST00000544910.1	-0.0815898	0.705905	328	0.200618
HSPB6_ENST00000004982.3	-0.000586299	0.101759	328	0.100177
HSPB6_ENST00000587965.1	-0.0666258	0.538395	328	0.160396
HSPB6_ENST00000592984.1	5.42497e-05	0.100162	328	0.100018
ARHGAP33_ENST00000007510.4	0.0707291	0.538478	328	0.160427
ARHGAP33_ENST00000221905.1	0.0553573	0.452592	328	0.145208
ARHGAP33_ENST00000314737.5	0.0499276	0.387289	328	0.135292
ARHGAP33_ENST00000378944.5	0.0572866	0.445183	328	0.143795
ARHGAP33_ENST00000586918.1	0.00758524	0.126871	328	0.103006
ARHGAP33_ENST00000587447.3	0.0418336	0.329126	328	0.12713
ARHGAP33_ENST00000587984.1	0.0280677	0.235185	328	0.116028
ARHGAP33_ENST00000588248.2	-0.0367578	0.305978	328	0.124532
ARHGAP33_ENST00000589133.1	-0.0539696	0.448893	328	0.144396
ARHGAP33_ENST00000590893.1	-0.0203301	0.191758	328	0.1109
ARHGAP33_ENST00000591438.1	0.0364836	0.277819	328	0.121271
ARHGAP33_ENST00000593034.1	0.0380589	0.292512	328	0.122794
ARHGAP33_ENST00000601474.1	0.0455963	0.351509	328	0.129936
NDUFAB1_ENST00000007516.3	0.0032923	0.110757	328	0.101192
NDUFAB1_ENST00000484769.1	0.0336613	0.271452	328	0.120572
NDUFAB1_ENST00000562133.1	-0.048856	0.399641	328	0.137247
NDUFAB1_ENST00000567761.1	0.0536022	0.449186	328	0.144464
NDUFAB1_ENST00000570319.1	0.0144587	0.157815	328	0.106925
PDK4_ENST00000005178.5	-0.130185	0.94457	328	0.380616
PDK4_ENST00000468445.1	-0.0489181	0.413489	328	0.139075
PDK4_ENST00000473301.1	-0.0739541	0.649236	328	0.18433
PDK4_ENST00000473796.1	-0.0633113	0.5551	328	0.163641
PDK4_ENST00000498190.1	-0.110775	0.893181	328	0.30821
SLC22A16_ENST00000330550.4	0.00505665	0.118243	328	0.102055
SLC22A16_ENST00000368919.3	-0.029974	0.2103	328	0.113304
SLC22A16_ENST00000424139.1	0.0406038	0.333295	328	0.127667
SLC22A16_ENST00000434949.1	-0.0160571	0.153161	328	0.106308
SLC22A16_ENST00000437378.1	0.051824	0.405354	328	0.138064
SLC22A16_ENST00000439654.1	-0.0023789	0.108051	328	0.100806
SLC22A16_ENST00000451557.1	0.0214891	0.176927	328	0.109188
SLC22A16_ENST00000456137.2	0.0163653	0.154504	328	0.10647
SLC22A16_ENST00000460159.1	0.000904506	0.102302	328	0.100206
SLC22A16_ENST00000461487.1	-0.0190915	0.163465	328	0.107471
ZMYND10_ENST00000231749.3	0.0308874	0.250563	328	0.118025
ZMYND10_ENST00000360165.3	0.0358491	0.270823	328	0.120461
ZMYND10_ENST00000431869.1	-0.0589692	0.510581	328	0.155219
ZMYND10_ENST00000442887.1	0.0140986	0.151104	328	0.105941
ZMYND10_ENST00000443080.1	0.019137	0.183088	328	0.109928
ZMYND10_ENST00000468182.1	-0.00648535	0.123676	328	0.102599
ZMYND10_ENST00000475688.1	0.0580755	0.477602	328	0.149001
ZMYND10_ENST00000478269.1	0.0574003	0.476839	328	0.148959
ZMYND10_ENST00000490675.1	0.0227787	0.20028	328	0.111981
ABCB5_ENST00000258738.6	-0.0822725	0.619056	328	0.176775
ABCB5_ENST00000404938.2	-0.0170464	0.169994	328	0.108335
ABCB5_ENST00000406935.1	-0.0743474	0.53382	328	0.159669
ABCB5_ENST00000441315.1	-0.0575583	0.490947	328	0.151664
ABCB5_ENST00000443026.2	-0.0812476	0.528407	328	0.158611
ABCB5_ENST00000477094.1	-0.0654146	0.451436	328	0.144959
ARX_ENST00000379044.4	-0.0183608	0.179048	328	0.109466
SLC25A13_ENST00000265631.5	0.0713229	0.562768	328	0.164952
SLC25A13_ENST00000416240.2	0.112912	0.872207	328	0.289995
SLC25A13_ENST00000472162.2	0.0510016	0.398489	328	0.13705
SLC25A13_ENST00000484495.1	0.0755128	0.652633	328	0.185087
SLC25A13_ENST00000487710.1	-0.0966666	0.810683	328	0.246747
SLC25A13_ENST00000490072.1	0.0517262	0.443841	328	0.14364
SLC25A13_ENST00000492869.1	0.0780437	0.679588	328	0.192565
SLC25A13_ENST00000494085.1	0.0253127	0.216357	328	0.113999
SLC25A13_ENST00000542654.1	0.0194079	0.179266	328	0.109496
ST7_ENST00000265437.5	-0.0256145	0.209414	328	0.113153
ST7_ENST00000323984.3	0.162608	0.988099	328	0.558963
ST7_ENST00000393443.1	0.00218626	0.10696	328	0.100724
ST7_ENST00000393444.3	-0.0266961	0.227274	328	0.115197
ST7_ENST00000393446.2	0.169493	0.993631	328	0.629053
ST7_ENST00000393447.4	0.0184639	0.176488	328	0.109112
ST7_ENST00000393449.1	0.107064	0.876616	328	0.294249
ST7_ENST00000393451.3	-0.0662471	0.527168	328	0.158444
ST7_ENST00000417919.1	-0.0401248	0.324626	328	0.126726
ST7_ENST00000420755.1	0.111292	0.901327	328	0.316868
ST7_ENST00000421345.1	0.0403435	0.337611	328	0.128174
ST7_ENST00000422922.1	-0.0590463	0.492668	328	0.151806
ST7_ENST00000432298.1	-0.00394453	0.113303	328	0.101369
ST7_ENST00000434836.1	-0.0405035	0.340983	328	0.128432
ST7_ENST00000438863.1	0.0975612	0.813746	328	0.24848
ST7_ENST00000443979.1	0.050974	0.43473	328	0.142272
ST7_ENST00000446490.1	-0.0503032	0.41275	328	0.138903
ST7_ENST00000449366.1	-0.021726	0.199226	328	0.11188
ST7_ENST00000462544.1	-0.00237532	0.108108	328	0.100815
ST7_ENST00000464020.1	-0.0323454	0.270975	328	0.120472
ST7_ENST00000465133.1	0.181561	0.99753	328	0.71905
ST7_ENST00000465641.1	-0.0255111	0.220443	328	0.114534
ST7_ENST00000467538.1	-0.0180982	0.177757	328	0.109294
ST7_ENST00000477742.1	-0.0581512	0.506448	328	0.154554
ST7_ENST00000485394.2	-0.0131077	0.15379	328	0.106383
ST7_ENST00000487459.1	0.0281804	0.23042	328	0.11555
ST7_ENST00000489293.1	0.09459	0.784137	328	0.233256
ST7_ENST00000490039.1	-0.00429398	0.11494	328	0.101592
ST7_ENST00000543837.1	0.0453343	0.375939	328	0.133389
CDC27_ENST00000066544.3	0.167032	0.984747	328	0.528677
CDC27_ENST00000446365.2	-0.04545	0.375362	328	0.133292
CDC27_ENST00000525495.2	0.014646	0.157447	328	0.106883
CDC27_ENST00000526866.1	0.0489184	0.388547	328	0.135513
CDC27_ENST00000527547.1	0.141072	0.95361	328	0.40023
CDC27_ENST00000528147.1	-0.000870114	0.102833	328	0.100242
CDC27_ENST00000528748.1	-0.00103479	0.103405	328	0.100321
CDC27_ENST00000531206.1	0.119981	0.909712	328	0.325952
CDC27_ENST00000532575.1	0.0205091	0.192795	328	0.110991
CDC27_ENST00000532893.1	0.0890478	0.746405	328	0.216092
CDC27_ENST00000533415.1	-0.04545	0.375362	328	0.133292
CDC27_ENST00000570740.1	0.00537693	0.117825	328	0.101991
CDC27_ENST00000570818.1	0.0937873	0.797074	328	0.239218
CDC27_ENST00000571643.1	0.0363482	0.2895	328	0.122598
CDC27_ENST00000573502.1	0.140292	0.9697	328	0.449257
CDC27_ENST00000573550.1	0.0591147	0.503424	328	0.15378
CDC27_ENST00000574304.1	0.0453273	0.377898	328	0.133757
CDC27_ENST00000575483.1	0.107543	0.835499	328	0.261855
CDC27_ENST00000575830.2	0.024025	0.21596	328	0.11398
CDC27_ENST00000576484.1	0.0403738	0.331001	328	0.127307
SLC4A1_ENST00000262418.6	0.0284205	0.240249	328	0.116669
SLC4A1_ENST00000471005.1	-0.0594889	0.518227	328	0.156888
SLC4A1_ENST00000497360.1	-0.0105735	0.141248	328	0.104739
SLC4A1_ENST00000498270.1	-0.00498872	0.117843	328	0.101995
CALCR_ENST00000360249.4	-0.0247512	0.219717	328	0.114424
CALCR_ENST00000415529.1	-0.078763	0.695092	328	0.197175
CALCR_ENST00000421592.1	0.0136163	0.156195	328	0.106681
CALCR_ENST00000423724.1	0.0321079	0.274092	328	0.120822
CALCR_ENST00000426151.1	0.00689012	0.12538	328	0.102809
HCCS_ENST00000321143.4	-0.0271265	0.231193	328	0.115591
HCCS_ENST00000380762.4	-0.0278151	0.234957	328	0.116019
HCCS_ENST00000380763.3	0.000827963	0.102701	328	0.100242
DVL2_ENST00000005340.5	0.0502089	0.38936	328	0.135609
DVL2_ENST00000571745.1	0.00501184	0.117601	328	0.10197
DVL2_ENST00000572285.1	0.0170144	0.168416	328	0.108136
DVL2_ENST00000573354.1	-0.00195161	0.106531	328	0.100665
DVL2_ENST00000574143.1	0.0895308	0.764855	328	0.224242
DVL2_ENST00000574591.1	0.0130585	0.150656	328	0.105898
DVL2_ENST00000574642.1	0.0116863	0.145318	328	0.105289
DVL2_ENST00000575086.1	0.108251	0.872619	328	0.290492
DVL2_ENST00000575458.1	0.0472458	0.373125	328	0.133061
DVL2_ENST00000575756.1	0.0597373	0.474498	328	0.148492
DVL2_ENST00000576285.1	0.0650714	0.54024	328	0.16084
DVL2_ENST00000576439.1	0.0742563	0.638378	328	0.181478
DVL2_ENST00000576840.1	0.00510242	0.11755	328	0.101951
DVL2_ENST00000576949.1	-0.0267625	0.226418	328	0.115058
DVL2_ENST00000577154.1	-0.0140094	0.156531	328	0.106702
PRSS22_ENST00000161006.3	-0.295871	0.999958	328	0.925074
PRSS22_ENST00000570950.1	-0.267203	0.999628	328	0.845371
PRSS22_ENST00000571228.1	-0.257315	0.999937	328	0.916022
PRSS22_ENST00000572061.1	-0.161161	0.983765	328	0.522652
PRSS22_ENST00000574768.1	-0.22838	0.998952	328	0.787894
PRSS22_ENST00000575164.1	-0.245946	0.999291	328	0.811911
PRSS22_ENST00000576381.1	-0.197202	0.992253	328	0.60698
PRSS22_ENST00000577177.1	-0.132363	0.931759	328	0.357253
UPF1_ENST00000262803.5	0.0727745	0.627477	328	0.178627
UPF1_ENST00000594243.1	0.0283247	0.23417	328	0.115864
UPF1_ENST00000594504.1	0.0386319	0.318221	328	0.125872
UPF1_ENST00000596842.1	0.015229	0.159706	328	0.107079
UPF1_ENST00000598209.1	0.0244274	0.21957	328	0.114393
UPF1_ENST00000598471.1	-0.0822481	0.706387	328	0.20077
UPF1_ENST00000599848.1	-0.0130985	0.151267	328	0.105953
UPF1_ENST00000600012.1	-0.0410484	0.337981	328	0.128216
UPF1_ENST00000600310.1	-0.0629638	0.523149	328	0.157673
UPF1_ENST00000600689.1	-0.0985187	0.820977	328	0.252564
UPF1_ENST00000600868.1	0.0586543	0.501	328	0.153434
UPF1_ENST00000601689.1	-0.0110065	0.141889	328	0.10485
UPF1_ENST00000601981.1	0.0751877	0.655058	328	0.185618
SKAP2_ENST00000345317.2	-0.102746	0.800925	328	0.241269
SKAP2_ENST00000432747.1	-0.162481	0.990443	328	0.582421
SKAP2_ENST00000468712.1	-0.0163919	0.170007	328	0.108338
SKAP2_ENST00000481204.1	-0.00933792	0.134379	328	0.1039
SKAP2_ENST00000487720.1	-0.098496	0.838806	328	0.264362
SKAP2_ENST00000489977.1	-0.0861046	0.758843	328	0.221448
SKAP2_ENST00000490456.2	0.0929863	0.804691	328	0.243433
SKAP2_ENST00000495802.1	0.0290333	0.246813	328	0.117555
SKAP2_ENST00000497511.1	-0.034814	0.282636	328	0.121793
SKAP2_ENST00000539623.1	0.102097	0.86162	328	0.281754
SLC25A5_ENST00000317881.8	0.0171989	0.173531	328	0.108775
SLC25A5_ENST00000460013.1	0.0480203	0.397744	328	0.136912
SLC25A5_ENST00000463551.1	0.00877685	0.133075	328	0.103811
SLC25A5_ENST00000475354.1	-0.0555489	0.473548	328	0.148392
CCDC109B_ENST00000394650.4	-0.087673	0.730268	328	0.209344
CCDC109B_ENST00000452915.2	-0.0335672	0.282727	328	0.121804
CCDC109B_ENST00000472310.1	-0.00196549	0.106429	328	0.100665
CCDC109B_ENST00000494604.1	-0.0664775	0.547927	328	0.162264
CCDC109B_ENST00000515114.1	-0.0388223	0.322697	328	0.1264
HOXA11_ENST00000006015.3	-0.0578489	0.461914	328	0.146592
HOXA11_ENST00000517402.1	-0.0378156	0.307155	328	0.124671
POLR2J_ENST00000292614.5	-0.0579127	0.463097	328	0.146746
POLR2J_ENST00000393794.3	0.0124627	0.145378	328	0.1053
DHX33_ENST00000225296.3	0.16655	0.984692	328	0.528384
DHX33_ENST00000433302.3	-0.00290029	0.109553	328	0.101011
DHX33_ENST00000572490.1	-0.0584507	0.503458	328	0.15378
DHX33_ENST00000574023.1	0.1269	0.937833	328	0.366544
DHX33_ENST00000575153.1	0.0718716	0.595424	328	0.171515
MEOX1_ENST00000318579.4	0.0202754	0.178133	328	0.109358
MEOX1_ENST00000329168.3	0.00987992	0.134673	328	0.103915
MEOX1_ENST00000393661.2	0.0179362	0.171152	328	0.108505
MEOX1_ENST00000549132.1	0.0644193	0.55802	328	0.164048
THSD7A_ENST00000408005.2	0.0473088	0.395573	328	0.136564
THSD7A_ENST00000423059.4	-0.0254166	0.214362	328	0.113801
THSD7A_ENST00000480061.1	-0.0427384	0.348727	328	0.129458
THSD7A_ENST00000497575.1	-0.0475835	0.382997	328	0.134559
LIG3_ENST00000262327.5	0.126903	0.942455	328	0.375704
LIG3_ENST00000378526.4	0.149316	0.971448	328	0.457954
LIG3_ENST00000585370.1	0.00330742	0.111536	328	0.101267
LIG3_ENST00000585740.1	-0.00384117	0.113109	328	0.101369
LIG3_ENST00000585941.1	0.120072	0.918136	328	0.336108
LIG3_ENST00000586058.1	0.0122092	0.146665	328	0.105488
LIG3_ENST00000586119.1	-0.0575177	0.481244	328	0.149835
LIG3_ENST00000586407.1	0.0589776	0.499641	328	0.153381
LIG3_ENST00000586435.1	0.00105638	0.103357	328	0.100321
LIG3_ENST00000588109.1	0.0786007	0.68669	328	0.194194
LIG3_ENST00000588713.1	0.107106	0.868371	328	0.286602
LIG3_ENST00000590181.1	0.0721883	0.591721	328	0.170906
LIG3_ENST00000590630.1	0.0748461	0.640712	328	0.182007
LIG3_ENST00000592244.1	0.0416544	0.351025	328	0.129832
LIG3_ENST00000592690.1	0.0613194	0.523237	328	0.157685
LIG3_ENST00000593099.1	0.118035	0.892842	328	0.307952
RPAP3_ENST00000005386.3	0.10593	0.858472	328	0.279797
RPAP3_ENST00000380650.4	0.00403272	0.113396	328	0.101376
RPAP3_ENST00000432584.3	-0.0227349	0.20223	328	0.112263
RPAP3_ENST00000547706.1	0.0666415	0.573243	328	0.167069
RPAP3_ENST00000548211.1	0.0487945	0.404155	328	0.13782
RPAP3_ENST00000548296.1	0.00264642	0.108961	328	0.100943
RPAP3_ENST00000551293.1	0.0158244	0.165164	328	0.107717
ACSM3_ENST00000289416.5	0.0204458	0.177858	328	0.109319
ACSM3_ENST00000440284.2	0.00612736	0.11877	328	0.102076
ACSM3_ENST00000450120.2	0.0390238	0.295709	328	0.123325
ACSM3_ENST00000501740.2	-0.0293493	0.224603	328	0.114916
ACSM3_ENST00000561499.1	0.00728415	0.125753	328	0.102901
ACSM3_ENST00000561584.1	-0.0180854	0.177943	328	0.109331
ACSM3_ENST00000561795.1	0.0753273	0.648077	328	0.184001
ACSM3_ENST00000562251.1	0.0390238	0.295709	328	0.123325
ACSM3_ENST00000563914.1	0.0124134	0.148737	328	0.105668
ACSM3_ENST00000564701.1	0.0332411	0.266843	328	0.120043
ACSM3_ENST00000567006.1	-0.0154983	0.15826	328	0.106952
ACSM3_ENST00000567387.1	0.0577927	0.444539	328	0.143764
ACSM3_ENST00000567711.1	0.0252932	0.213552	328	0.113732
ACSM3_ENST00000568235.1	0.056129	0.453982	328	0.145333
ACSM3_ENST00000569141.1	0.0682986	0.572269	328	0.166791
AC004381.6_ENST00000261377.6	0.0397909	0.322995	328	0.126422
AC004381.6_ENST00000348433.6	0.0591225	0.461062	328	0.146512
AC004381.6_ENST00000561474.1	-0.0225671	0.203356	328	0.112445
AC004381.6_ENST00000563045.1	-0.0469163	0.374524	328	0.13326
AC004381.6_ENST00000563068.1	0.0325526	0.258718	328	0.118978
AC004381.6_ENST00000563617.1	0.00237738	0.10809	328	0.100813
AC004381.6_ENST00000564200.1	0.0293916	0.25136	328	0.118127
AC004381.6_ENST00000564274.1	-0.039814	0.322102	328	0.12629
AC004381.6_ENST00000565340.1	-0.0192363	0.18497	328	0.110127
AC004381.6_ENST00000566276.1	0.00760597	0.128068	328	0.103172
AC004381.6_ENST00000566518.1	-0.0289509	0.241782	328	0.116937
AC004381.6_ENST00000566993.1	0.0212617	0.187311	328	0.110448
AC004381.6_ENST00000567297.1	0.0890564	0.775772	328	0.229422
AC004381.6_ENST00000568046.1	0.0204453	0.188606	328	0.110601
AC004381.6_ENST00000568334.1	-0.0304011	0.245926	328	0.117459
AC004381.6_ENST00000568476.1	0.0520479	0.426772	328	0.141118
AC004381.6_ENST00000568501.1	0.00836459	0.12986	328	0.103397
AC004381.6_ENST00000568647.1	-0.0504947	0.427721	328	0.141328
AC004381.6_ENST00000568894.1	0.0353848	0.295379	328	0.123241
CIAPIN1_ENST00000394391.4	0.116886	0.913369	328	0.330546
CIAPIN1_ENST00000563341.1	0.0312675	0.262289	328	0.11943
CIAPIN1_ENST00000563561.1	0.0712332	0.590842	328	0.170632
CIAPIN1_ENST00000564885.1	-0.0891277	0.758709	328	0.221431
CIAPIN1_ENST00000565368.1	0.140519	0.967792	328	0.441368
CIAPIN1_ENST00000565786.1	0.119872	0.916591	328	0.334727
CIAPIN1_ENST00000565961.1	-0.0856612	0.74212	328	0.214193
CIAPIN1_ENST00000566284.1	0.0538792	0.431715	328	0.141814
CIAPIN1_ENST00000567518.1	0.115527	0.914559	328	0.331824
CIAPIN1_ENST00000567751.1	-0.0508144	0.424146	328	0.140698
CIAPIN1_ENST00000568940.1	0.0520824	0.435093	328	0.142296
CIAPIN1_ENST00000569246.1	-0.0392566	0.327399	328	0.127046
CIAPIN1_ENST00000569370.1	0.0657788	0.573123	328	0.167028
CIAPIN1_ENST00000569979.1	0.0482584	0.403578	328	0.137715
CIAPIN1_ENST00000570000.1	-0.00710303	0.126131	328	0.102936
SPPL2B_ENST00000452401.2	-0.000645855	0.102091	328	0.100178
SPPL2B_ENST00000585725.2	0.00614942	0.120488	328	0.102231
SPPL2B_ENST00000586332.1	-0.0227585	0.19824	328	0.111782
SPPL2B_ENST00000586377.2	0.112184	0.867931	328	0.286108
SPPL2B_ENST00000587851.1	0.03018	0.242703	328	0.117072
SPPL2B_ENST00000589515.2	-0.0305151	0.243585	328	0.117225
SPPL2B_ENST00000590295.2	0.033994	0.280499	328	0.121566
SPPL2B_ENST00000590902.1	-0.0376849	0.301825	328	0.124077
SPPL2B_ENST00000590982.1	-0.0148897	0.15865	328	0.106968
SPPL2B_ENST00000591959.2	-0.029007	0.244098	328	0.117285
SPPL2B_ENST00000592738.2	-0.0159545	0.16092	328	0.107206
SPPL2B_ENST00000592845.2	-0.00540813	0.118389	328	0.102064
SPPL2B_ENST00000593198.1	-0.0629082	0.526151	328	0.158289
SPPL2B_ENST00000593243.1	-0.0552217	0.476778	328	0.148933
SPPL2B_ENST00000610255.1	0.131554	0.963988	328	0.428381
FAM214B_ENST00000322813.5	-0.0091927	0.13208	328	0.103688
FAM214B_ENST00000378554.2	-0.0285709	0.220493	328	0.114543
FAM214B_ENST00000378557.1	0.0765118	0.601449	328	0.17275
FAM214B_ENST00000378561.1	0.0601067	0.48985	328	0.151501
FAM214B_ENST00000378566.1	-0.0503269	0.368004	328	0.132326
FAM214B_ENST00000488109.2	0.0888279	0.752592	328	0.218381
FAM214B_ENST00000603301.1	0.0126775	0.143233	328	0.104993
FAM214B_ENST00000605104.1	0.0759424	0.639152	328	0.181654
FAM214B_ENST00000605244.1	0.0212625	0.195612	328	0.111358
FAM214B_ENST00000605392.1	0.000812272	0.102465	328	0.100216
COPZ2_ENST00000006101.4	-0.129167	0.889141	328	0.304814
COPZ2_ENST00000579263.1	-0.104226	0.764833	328	0.224242
COPZ2_ENST00000580174.1	-0.0455963	0.385953	328	0.135052
COPZ2_ENST00000580409.1	-0.0151467	0.15933	328	0.107037
COPZ2_ENST00000581637.1	-0.0517771	0.397619	328	0.136882
COPZ2_ENST00000581756.1	-0.115135	0.853436	328	0.275674
COPZ2_ENST00000582553.1	-0.0438919	0.334984	328	0.127886
COPZ2_ENST00000583414.1	-0.0359805	0.262796	328	0.119499
COPZ2_ENST00000584666.1	-0.0518478	0.452167	328	0.145153
COPZ2_ENST00000584955.1	-0.10861	0.852047	328	0.274421
COPZ2_ENST00000585182.1	-0.00650188	0.122443	328	0.102492
PRKAR2B_ENST00000265717.4	0.0896552	0.709129	328	0.201569
PRKAR2B_ENST00000393613.2	-0.0876819	0.760723	328	0.222243
PRKAR2B_ENST00000488792.1	-0.0170939	0.172294	328	0.108637
MSL3_ENST00000312196.4	0.0896992	0.753196	328	0.218617
MSL3_ENST00000337339.2	-0.061974	0.517131	328	0.156717
MSL3_ENST00000361672.2	-0.0425544	0.356896	328	0.130524
MSL3_ENST00000380691.2	0.0370369	0.306037	328	0.124554
MSL3_ENST00000380692.2	-0.020286	0.187586	328	0.110491
MSL3_ENST00000380693.3	-0.0622187	0.499517	328	0.15334
MSL3_ENST00000398527.2	0.0397204	0.328481	328	0.127109
MSL3_ENST00000421368.2	0.0393774	0.318516	328	0.125924
MSL3_ENST00000467141.1	-0.0431309	0.354674	328	0.13026
MSL3_ENST00000468149.1	-0.0639807	0.5452	328	0.161747
MSL3_ENST00000473380.1	-0.065518	0.5516	328	0.162962
MSL3_ENST00000473806.1	0.00249722	0.105396	328	0.100546
MSL3_ENST00000476743.1	0.113512	0.902667	328	0.318134
MSL3_ENST00000478462.1	-0.0398952	0.326889	328	0.127007
MSL3_ENST00000482871.1	0.0272735	0.199048	328	0.111878
MSL3_ENST00000483645.1	0.0467034	0.340971	328	0.128432
MSL3_ENST00000494268.1	0.0116121	0.144065	328	0.105061
CREBBP_ENST00000262367.5	0.0118033	0.145868	328	0.105382
CREBBP_ENST00000382070.3	0.0295097	0.245303	328	0.117399
CREBBP_ENST00000570939.1	-0.0317143	0.258786	328	0.118983
CREBBP_ENST00000571763.1	-0.0167771	0.171075	328	0.108469
CREBBP_ENST00000571826.1	-0.0900875	0.780423	328	0.231706
CREBBP_ENST00000572134.1	0.143788	0.971185	328	0.45708
CREBBP_ENST00000572569.1	0.0219398	0.197382	328	0.111655
CREBBP_ENST00000573517.1	-0.0193936	0.183859	328	0.110043
CREBBP_ENST00000573672.1	0.0243516	0.211478	328	0.113449
CREBBP_ENST00000574740.1	-0.0284495	0.239445	328	0.116578
CREBBP_ENST00000575237.1	0.0481752	0.406435	328	0.138153
CREBBP_ENST00000576720.1	-0.012251	0.148197	328	0.105615
BZRAP1_ENST00000268893.6	0.0424494	0.307026	328	0.124656
BZRAP1_ENST00000343736.4	0.0279809	0.2304	328	0.11555
BZRAP1_ENST00000355701.3	-0.0498636	0.296798	328	0.123495
BZRAP1_ENST00000577871.1	0.0314088	0.253213	328	0.118422
BZRAP1_ENST00000578486.1	0.0257365	0.211418	328	0.113434
BZRAP1_ENST00000578511.1	0.0581984	0.435093	328	0.142296
BZRAP1_ENST00000580669.1	0.0223641	0.193021	328	0.11102
BZRAP1_ENST00000581675.1	0.020559	0.182034	328	0.109784
BZRAP1_ENST00000581692.1	0.0525876	0.342419	328	0.128581
BZRAP1_ENST00000582679.1	0.0476669	0.386394	328	0.135132
BZRAP1_ENST00000583624.1	0.0198649	0.179637	328	0.109526
BZRAP1_ENST00000585149.1	-0.00577797	0.113853	328	0.101429
MPO_ENST00000225275.3	-0.031509	0.231349	328	0.115607
MPO_ENST00000340482.3	-0.0300827	0.254901	328	0.118575
MPO_ENST00000577220.1	-0.0103405	0.139606	328	0.104554
MPO_ENST00000578493.1	-0.0792575	0.600669	328	0.172727
MPO_ENST00000580005.1	-0.0322409	0.254798	328	0.118575
MPO_ENST00000581022.1	-0.0385487	0.302848	328	0.124198
PON1_ENST00000222381.3	-0.0345888	0.278101	328	0.121307
PON1_ENST00000433729.1	0.0313524	0.244121	328	0.117288
PON1_ENST00000462594.1	-0.0495204	0.417654	328	0.139595
PON1_ENST00000470502.1	-0.013335	0.153908	328	0.106402
PON1_ENST00000542556.1	-0.0686856	0.583975	328	0.168963
GCFC2_ENST00000321027.3	0.192668	0.997545	328	0.719612
GCFC2_ENST00000409857.3	0.0850093	0.731568	328	0.209615
GCFC2_ENST00000427862.1	0.0439197	0.350244	328	0.129718
GCFC2_ENST00000442309.1	0.0207465	0.190903	328	0.110811
GCFC2_ENST00000470197.1	0.0118766	0.145631	328	0.10532
GCFC2_ENST00000470285.1	0.133626	0.962391	328	0.423509
GCFC2_ENST00000470503.1	0.0944351	0.768712	328	0.226187
GCFC2_ENST00000472230.1	0.10445	0.84596	328	0.269152
GCFC2_ENST00000486016.1	0.110313	0.879864	328	0.297371
GCFC2_ENST00000492826.1	0.0227507	0.205856	328	0.112744
GCFC2_ENST00000541687.1	0.0747125	0.63939	328	0.181733
WDR54_ENST00000348227.4	0.0167373	0.162828	328	0.107414
WDR54_ENST00000409791.1	0.0519715	0.393564	328	0.136219
WDR54_ENST00000426787.1	0.0833722	0.690898	328	0.195539
WDR54_ENST00000461531.1	0.0160181	0.162109	328	0.107341
WDR54_ENST00000465134.1	-0.0089571	0.130713	328	0.103482
WDR54_ENST00000468778.1	0.0113706	0.141622	328	0.104806
WDR54_ENST00000469321.1	-0.010288	0.135434	328	0.104023
WDR54_ENST00000469932.1	-0.0138085	0.154545	328	0.106475
WDR54_ENST00000475328.1	0.048206	0.384392	328	0.134821
WDR54_ENST00000480089.1	0.085514	0.687678	328	0.194535
WDR54_ENST00000482605.1	-0.0698094	0.601831	328	0.172835
WDR54_ENST00000482880.1	0.0688427	0.536692	328	0.160141
WDR54_ENST00000493982.1	0.0831801	0.717394	328	0.204094
CROT_ENST00000331536.3	-0.0735234	0.58173	328	0.168557
CROT_ENST00000412227.2	-0.104083	0.83031	328	0.258277
CROT_ENST00000419147.2	-0.00795318	0.127513	328	0.103098
CROT_ENST00000442291.1	-0.0395092	0.318815	328	0.125928
CROT_ENST00000469785.1	-0.00771039	0.125905	328	0.102918
CROT_ENST00000479014.1	-0.0181063	0.171644	328	0.108559
CROT_ENST00000488850.1	-0.024523	0.208752	328	0.113071
ABCB4_ENST00000265723.4	-0.102547	0.721678	328	0.205654
ABCB4_ENST00000358400.3	-0.113305	0.815778	328	0.249403
ABCB4_ENST00000359206.3	-0.121143	0.889472	328	0.304991
ABCB4_ENST00000417608.1	-0.103549	0.813939	328	0.248581
ABCB4_ENST00000440025.1	-0.117359	0.893047	328	0.308162
ABCB4_ENST00000453593.1	0.0197273	0.188639	328	0.110601
ABCB4_ENST00000467079.1	-0.137513	0.955529	328	0.404659
ABCB4_ENST00000467983.1	-0.0900744	0.709994	328	0.201897
ABCB4_ENST00000469770.1	-0.108868	0.838471	328	0.264169
ABCB4_ENST00000473795.1	-0.0933471	0.782542	328	0.232595
ABCB4_ENST00000545634.1	0.0144706	0.157938	328	0.106943
KMT2E_ENST00000257745.4	-0.00450958	0.115314	328	0.101681
KMT2E_ENST00000311117.3	0.162035	0.98774	328	0.55471
KMT2E_ENST00000334877.4	0.00744216	0.126413	328	0.102966
KMT2E_ENST00000334884.5	-0.0999185	0.820138	328	0.251995
KMT2E_ENST00000334914.7	-0.0531404	0.463395	328	0.146778
KMT2E_ENST00000468607.1	0.0589739	0.489243	328	0.151327
KMT2E_ENST00000473063.1	-0.0432543	0.370543	328	0.132779
KMT2E_ENST00000474203.1	0.0277831	0.228844	328	0.115391
KMT2E_ENST00000476671.1	0.135413	0.955092	328	0.403847
KMT2E_ENST00000478079.1	0.0217487	0.198799	328	0.111861
KMT2E_ENST00000478990.1	0.074875	0.643429	328	0.182578
KMT2E_ENST00000479838.2	0.0844436	0.72093	328	0.205435
KMT2E_ENST00000480368.1	0.0679086	0.574929	328	0.167317
KMT2E_ENST00000482560.2	0.0706622	0.611643	328	0.175032
KMT2E_ENST00000485619.1	0.00026739	0.100874	328	0.100078
KMT2E_ENST00000495267.1	0.0832588	0.688209	328	0.194709
KMT2E_ENST00000496191.1	0.0899006	0.764528	328	0.224067
RHBDD2_ENST00000006777.6	0.0167278	0.166436	328	0.107886
RHBDD2_ENST00000318622.4	-0.00681408	0.123382	328	0.102568
RHBDD2_ENST00000428119.1	0.00917997	0.133533	328	0.10384
RHBDD2_ENST00000454791.1	0.0121326	0.147872	328	0.105551
RHBDD2_ENST00000466232.1	-0.00808465	0.129103	328	0.103322
RHBDD2_ENST00000467406.2	-0.0685435	0.563254	328	0.16504
RHBDD2_ENST00000468304.1	-0.147933	0.977428	328	0.484508
RHBDD2_ENST00000468644.1	0.147303	0.979676	328	0.496903
RHBDD2_ENST00000476218.1	0.0421526	0.357449	328	0.130594
SOX8_ENST00000293894.3	0.0529902	0.430707	328	0.141711
SOX8_ENST00000566034.1	0.0538891	0.43108	328	0.141718
IBTK_ENST00000306270.7	0.11916	0.910918	328	0.327523
IBTK_ENST00000445419.2	-0.0501328	0.413922	328	0.139121
IBTK_ENST00000471036.1	0.0193981	0.18352	328	0.109983
IBTK_ENST00000503400.1	0.0060685	0.120988	328	0.1023
IBTK_ENST00000503631.1	0.0221982	0.203985	328	0.112506
IBTK_ENST00000505222.1	0.0127637	0.149297	328	0.105739
IBTK_ENST00000508381.1	-0.0625069	0.517869	328	0.156806
IBTK_ENST00000510291.1	0.159603	0.988876	328	0.566855
ZNF195_ENST00000005082.9	-0.032402	0.259933	328	0.119155
ZNF195_ENST00000330692.7	-0.0339766	0.281217	328	0.121656
ZNF195_ENST00000343338.7	-0.00547072	0.118744	328	0.102076
ZNF195_ENST00000354599.6	-0.0445324	0.343009	328	0.128693
ZNF195_ENST00000399602.4	-0.0828372	0.682913	328	0.19344
ZNF195_ENST00000427810.2	-0.0757836	0.64366	328	0.182619
ZNF195_ENST00000429541.2	-0.0582841	0.453579	328	0.145285
ZNF195_ENST00000438262.2	0.0103839	0.139437	328	0.104541
ZNF195_ENST00000524857.1	-0.00466396	0.116037	328	0.101744
ZNF195_ENST00000525313.2	0.0032926	0.110897	328	0.101199
ZNF195_ENST00000525502.1	-0.0461749	0.381004	328	0.134271
ZNF195_ENST00000526501.1	-0.0800319	0.686508	328	0.194129
ZNF195_ENST00000526540.1	0.0272881	0.233691	328	0.115832
ZNF195_ENST00000526598.1	-0.0282787	0.235477	328	0.116045
ZNF195_ENST00000526601.1	-0.00330918	0.110653	328	0.101176
ZNF195_ENST00000527386.1	-0.00979211	0.133979	328	0.103861
ZNF195_ENST00000528218.1	-0.0896278	0.728865	328	0.208774
ZNF195_ENST00000528410.1	-0.116873	0.908717	328	0.32493
ZNF195_ENST00000528636.1	-0.0154245	0.160506	328	0.107178
ZNF195_ENST00000528796.1	0.0384765	0.260806	328	0.119262
ZNF195_ENST00000529085.1	0.0116259	0.143397	328	0.104993
ZNF195_ENST00000529228.1	-0.0298119	0.250037	328	0.117963
ZNF195_ENST00000529678.1	-0.0298134	0.243654	328	0.117241
ZNF195_ENST00000529789.1	0.0149024	0.159934	328	0.107112
ZNF195_ENST00000530643.1	-0.0389135	0.315331	328	0.125486
ZNF195_ENST00000532539.1	0.0499053	0.408227	328	0.138383
ZNF195_ENST00000533036.1	-0.0843701	0.724657	328	0.206895
ZNF195_ENST00000534569.1	0.00212367	0.106855	328	0.100683
MYCBP2_ENST00000360084.5	0.157515	0.986241	328	0.544326
MYCBP2_ENST00000407578.2	0.0392314	0.314585	328	0.125389
MYCBP2_ENST00000429715.1	0.00861149	0.128862	328	0.103313
MYCBP2_ENST00000462987.2	0.151099	0.978078	328	0.487552
MYCBP2_ENST00000466564.2	-0.0452645	0.378075	328	0.133779
MYCBP2_ENST00000474882.2	0.063372	0.538027	328	0.160338
MYCBP2_ENST00000482517.1	0.0709421	0.586121	328	0.169369
MYCBP2_ENST00000485061.2	-0.0536808	0.442312	328	0.143424
MYCBP2_ENST00000486679.2	0.045621	0.379744	328	0.13404
MYCBP2_ENST00000491491.1	-0.0919781	0.787551	328	0.234922
MYCBP2_ENST00000498073.2	0.104106	0.833434	328	0.260715
MYCBP2_ENST00000544440.2	0.0638269	0.503203	328	0.153727
FBXL3_ENST00000355619.5	-0.00675573	0.124696	328	0.102746
FBXL3_ENST00000417323.1	0.0209166	0.194866	328	0.111271
FBXL3_ENST00000470210.1	-0.0629381	0.547577	328	0.162185
FBXL3_ENST00000472949.1	-0.0405154	0.343369	328	0.128713
FBXL3_ENST00000477982.1	0.0422593	0.355605	328	0.130319
FBXL3_ENST00000485797.1	0.0122045	0.147425	328	0.105521
ITGAL_ENST00000356798.6	-0.031641	0.158577	328	0.106967
ITGAL_ENST00000358164.5	-0.030603	0.16639	328	0.107875
ITGAL_ENST00000433423.2	-0.0298019	0.209606	328	0.11318
ITGAL_ENST00000454514.2	0.0642835	0.491948	328	0.151699
ITGAL_ENST00000562020.1	-0.0141632	0.133826	328	0.103861
ITGAL_ENST00000562652.1	-0.0213606	0.158513	328	0.106961
ITGAL_ENST00000562857.1	-0.105141	0.687869	328	0.194576
ITGAL_ENST00000563615.1	-0.0259257	0.159176	328	0.107023
ITGAL_ENST00000564118.1	0.0500114	0.430907	328	0.141711
ITGAL_ENST00000564632.1	-0.025298	0.163554	328	0.107478
ITGAL_ENST00000564935.1	-0.0555287	0.393454	328	0.136204
ITGAL_ENST00000565348.1	-0.010027	0.13712	328	0.104202
ITGAL_ENST00000565864.1	-0.0784706	0.41757	328	0.139577
ITGAL_ENST00000566149.1	-0.0237622	0.181471	328	0.109699
ITGAL_ENST00000566267.1	0.0444984	0.372952	328	0.133017
ITGAL_ENST00000568012.1	-0.0243951	0.206548	328	0.112852
ITGAL_ENST00000568926.1	0.03241	0.251538	328	0.118158
ITGAL_ENST00000568987.1	-0.0667817	0.374939	328	0.133289
ITGAL_ENST00000569570.1	0.0332961	0.21394	328	0.113758
ITGAL_ENST00000569725.1	-0.0296863	0.193631	328	0.111082
PDK2_ENST00000007708.3	-0.0425971	0.348516	328	0.129415
PDK2_ENST00000503076.1	-0.0380583	0.307726	328	0.124692
PDK2_ENST00000503176.1	0.0560706	0.470307	328	0.147948
PDK2_ENST00000503614.1	0.077529	0.665562	328	0.188245
PDK2_ENST00000505440.1	0.000581663	0.101884	328	0.100177
PDK2_ENST00000505897.1	-0.041248	0.333078	328	0.127643
PDK2_ENST00000506242.1	-0.00465867	0.116561	328	0.10182
PDK2_ENST00000506647.1	-0.0210036	0.195677	328	0.111379
PDK2_ENST00000508030.1	-0.00250211	0.108584	328	0.100899
PDK2_ENST00000508960.1	-0.0229513	0.201363	328	0.112154
PDK2_ENST00000510219.2	0.119012	0.926428	328	0.349011
PDK2_ENST00000511026.1	-0.0355679	0.285949	328	0.122243
PDK2_ENST00000512204.1	-0.0752167	0.633769	328	0.180285
PDK2_ENST00000515040.1	-0.0124449	0.147742	328	0.10553
ITGA3_ENST00000007722.7	-0.0237306	0.203019	328	0.112395
ITGA3_ENST00000320031.8	-0.111451	0.806544	328	0.244511
ITGA3_ENST00000504417.1	-0.0778606	0.646892	328	0.183636
ITGA3_ENST00000505306.1	-0.0534308	0.387406	328	0.135312
ITGA3_ENST00000505552.1	-0.071621	0.558293	328	0.164075
ITGA3_ENST00000505612.1	-0.0675073	0.522541	328	0.157548
ITGA3_ENST00000506401.2	-0.0223602	0.201908	328	0.112228
ITGA3_ENST00000506437.1	-0.132418	0.91856	328	0.336365
ITGA3_ENST00000506827.1	-0.0621032	0.493824	328	0.152035
ITGA3_ENST00000507771.1	-0.106307	0.813743	328	0.24848
ITGA3_ENST00000508100.1	-0.0938089	0.757645	328	0.220831
ITGA3_ENST00000510809.1	-0.0529958	0.391979	328	0.136066
ITGA3_ENST00000512553.1	-0.0951236	0.750359	328	0.217738
ITGA3_ENST00000514834.1	-0.121751	0.864422	328	0.283979
ITGA3_ENST00000515147.1	-0.0801349	0.619212	328	0.176799
ITGA3_ENST00000544892.1	-0.0600041	0.442066	328	0.14339
ITGA3_ENST00000570989.1	-0.0673547	0.537812	328	0.160338
ZFX_ENST00000304543.5	0.000683019	0.10215	328	0.100181
ZFX_ENST00000338565.3	-0.0500283	0.424705	328	0.140775
ZFX_ENST00000379177.1	0.093415	0.782589	328	0.232634
ZFX_ENST00000379188.3	0.0290751	0.243532	328	0.117225
ZFX_ENST00000419690.1	0.0454529	0.375179	328	0.133289
ZFX_ENST00000428571.1	0.0377757	0.304589	328	0.124359
ZFX_ENST00000459724.1	0.0147575	0.161257	328	0.107215
ZFX_ENST00000474385.1	0.0416611	0.343942	328	0.128754
ZFX_ENST00000480195.1	-0.0318402	0.264257	328	0.119638
ZFX_ENST00000497813.1	-0.0210367	0.19334	328	0.111046
ZFX_ENST00000539115.1	-0.0477416	0.399687	328	0.137256
ZFX_ENST00000540034.1	0.0107257	0.139518	328	0.104552
LAMP2_ENST00000200639.4	-0.108337	0.779976	328	0.23146
LAMP2_ENST00000371335.4	-0.0699591	0.53734	328	0.16026
LAMP2_ENST00000434600.2	0.0151092	0.154611	328	0.106494
LAMP2_ENST00000486593.1	-0.121174	0.8709	328	0.288866
LAMP2_ENST00000538785.1	-0.012432	0.146874	328	0.105513
LAMP2_ENST00000540603.1	0.0102688	0.131762	328	0.103622
GGNBP2_ENST00000304718.4	-0.0149023	0.16104	328	0.107212
GGNBP2_ENST00000483256.1	-0.00829825	0.129796	328	0.103397
GGNBP2_ENST00000485685.2	0.0351071	0.269214	328	0.120288
GGNBP2_ENST00000486208.2	-0.0291451	0.242932	328	0.11712
GGNBP2_ENST00000495023.1	-0.0231084	0.204759	328	0.112574
GGNBP2_ENST00000586045.1	-0.0259833	0.220554	328	0.114549
GGNBP2_ENST00000588222.1	-0.0152456	0.160906	328	0.107206
GGNBP2_ENST00000589269.1	-0.0172656	0.172445	328	0.108651
GGNBP2_ENST00000593016.1	0.0665907	0.570956	328	0.166618
ITGA2B_ENST00000262407.5	0.0265816	0.204113	328	0.112506
ITGA2B_ENST00000353281.4	0.0232461	0.189368	328	0.110699
ITGA2B_ENST00000377068.3	0.0662145	0.573829	328	0.167117
ITGA2B_ENST00000587295.1	0.00523642	0.118941	328	0.102097
ITGA2B_ENST00000588098.1	-0.00852742	0.127777	328	0.103153
ITGA2B_ENST00000589645.1	0.0353151	0.263493	328	0.119546
ITGA2B_ENST00000591990.1	0.0471235	0.348029	328	0.129347
ITGA2B_ENST00000592075.1	0.0513718	0.400621	328	0.13732
ITGA2B_ENST00000592226.1	0.030789	0.232771	328	0.115762
ITGA2B_ENST00000592253.1	-0.0341326	0.267796	328	0.120141
ITGA2B_ENST00000592462.1	0.0575365	0.428526	328	0.141407
ITGA2B_ENST00000592944.1	0.036863	0.263962	328	0.119623
ASB4_ENST00000257621.4	-0.115482	0.904607	328	0.320516
ASB4_ENST00000325885.5	-0.0868569	0.738933	328	0.212564
ASB4_ENST00000428113.1	-0.0765002	0.656216	328	0.185877
GDE1_ENST00000353258.3	-0.0510596	0.42581	328	0.140974
GDE1_ENST00000563645.1	-0.0282183	0.239683	328	0.116593
GDE1_ENST00000564172.1	-0.051757	0.416516	328	0.139415
GDE1_ENST00000569773.1	-0.103459	0.848472	328	0.271528
GDE1_ENST00000569899.1	-0.113965	0.875855	328	0.293528
C19orf60_ENST00000358607.6	-0.027436	0.227417	328	0.115207
C19orf60_ENST00000450195.2	-0.0622782	0.508189	328	0.154823
C19orf60_ENST00000595077.1	0.0346637	0.280031	328	0.121524
C19orf60_ENST00000595490.1	0.0375781	0.313676	328	0.125257
C19orf60_ENST00000597371.1	-0.0550913	0.439416	328	0.143053
C19orf60_ENST00000598375.1	0.063089	0.523854	328	0.157827
C19orf60_ENST00000600997.1	0.0336487	0.266759	328	0.120037
C19orf60_ENST00000601736.1	0.000390351	0.101268	328	0.100119
CRLF1_ENST00000392386.3	0.0130476	0.150024	328	0.105824
CRLF1_ENST00000593286.1	-0.0181568	0.180241	328	0.109558
CRLF1_ENST00000594325.1	0.030251	0.250413	328	0.117999
CRLF1_ENST00000596360.1	0.0124745	0.148269	328	0.105619
CRLF1_ENST00000597131.1	0.0116625	0.144009	328	0.105061
OSBPL7_ENST00000007414.3	-0.0667314	0.549515	328	0.16257
OSBPL7_ENST00000392507.3	-0.00131438	0.104344	328	0.10044
OSBPL7_ENST00000578461.1	-0.10092	0.838161	328	0.263878
OSBPL7_ENST00000579728.1	-0.0659746	0.553909	328	0.163422
OSBPL7_ENST00000580140.1	-0.102199	0.837522	328	0.263517
OSBPL7_ENST00000580226.1	-0.0548469	0.448484	328	0.144346
OSBPL7_ENST00000580808.1	0.0287762	0.242044	328	0.116962
OSBPL7_ENST00000583167.1	-0.0800723	0.668675	328	0.189318
OSBPL7_ENST00000584698.1	0.0557831	0.441472	328	0.14339
OSBPL7_ENST00000585051.1	-0.120631	0.91887	328	0.336557
TMEM98_ENST00000261713.4	0.0626055	0.542762	328	0.161182
TMEM98_ENST00000394642.3	-0.0867169	0.699763	328	0.198664
TMEM98_ENST00000395149.2	-0.0552876	0.427942	328	0.141369
TMEM98_ENST00000439138.1	-0.0793189	0.632168	328	0.179936
TMEM98_ENST00000578289.1	-0.114058	0.867013	328	0.285496
TMEM98_ENST00000579849.1	-0.0425268	0.329277	328	0.127153
TMEM98_ENST00000582227.1	0.0233079	0.207059	328	0.112909
TMEM98_ENST00000583120.1	-0.0401132	0.322009	328	0.126271
TMEM98_ENST00000583437.2	0.0138407	0.151728	328	0.106054
YBX2_ENST00000007699.5	-0.0403371	0.294362	328	0.123052
YBX2_ENST00000570627.1	-0.0547364	0.414306	328	0.139127
YBX2_ENST00000570720.1	-0.028148	0.218929	328	0.114282
YBX2_ENST00000571127.1	-0.00951204	0.135082	328	0.103963
YBX2_ENST00000571464.1	-0.0638792	0.545838	328	0.161811
YBX2_ENST00000571485.1	-0.0212915	0.181455	328	0.109699
YBX2_ENST00000571834.1	-0.0341252	0.24997	328	0.117947
KRT33A_ENST00000007735.3	-0.0787517	0.654504	328	0.185509
MAP3K14_ENST00000344686.2	0.0749247	0.618859	328	0.176742
MAP3K14_ENST00000376926.4	0.00421944	0.114095	328	0.101462
MAP3K14_ENST00000586644.1	0.122802	0.918206	328	0.336232
MAP3K14_ENST00000587332.1	0.0875195	0.712502	328	0.202786
MAP3K14_ENST00000592267.1	0.0865376	0.711212	328	0.202257
ABCC8_ENST00000302539.4	-0.00312956	0.110074	328	0.101069
ABCC8_ENST00000389817.3	0.000963497	0.102988	328	0.100273
ABCC8_ENST00000524561.1	0.00746305	0.12584	328	0.10291
ABCC8_ENST00000525022.1	0.00365006	0.112511	328	0.101337
ABCC8_ENST00000526002.1	0.0258681	0.228653	328	0.115371
ABCC8_ENST00000526037.1	-0.0028844	0.10915	328	0.100977
ABCC8_ENST00000526168.1	0.004426	0.114747	328	0.101566
ABCC8_ENST00000526921.1	0.049165	0.407213	328	0.138261
ABCC8_ENST00000527905.1	-0.00281625	0.109329	328	0.100987
ABCC8_ENST00000528202.1	0.00558529	0.119131	328	0.102101
ABCC8_ENST00000528374.1	0.0116033	0.144222	328	0.105061
ABCC8_ENST00000529967.1	-0.0154683	0.161141	328	0.107212
ABCC8_ENST00000530147.1	0.00921613	0.134451	328	0.103906
ABCC8_ENST00000531137.1	0.0717401	0.613415	328	0.17547
ABCC8_ENST00000531642.1	-0.00372581	0.112598	328	0.101344
ABCC8_ENST00000531891.1	-0.00995621	0.13714	328	0.104213
ABCC8_ENST00000531911.1	0.012806	0.149491	328	0.105757
ABCC8_ENST00000532220.1	-0.0136545	0.153209	328	0.10631
ABCC8_ENST00000532728.1	0.0396823	0.322663	328	0.126393
CCL18_ENST00000004921.3	-0.0996892	0.747536	328	0.216611
CCL18_ENST00000586857.1	-0.0359092	0.297653	328	0.123563
CCL3_ENST00000225245.5	-0.0826412	0.541278	328	0.160982
CCL3_ENST00000470334.1	0.0361721	0.230753	328	0.115582
CCL3_ENST00000585830.1	0.0619398	0.540924	328	0.160886
SYNRG_ENST00000339208.6	0.0584705	0.467032	328	0.14748
SYNRG_ENST00000345615.4	-0.0594522	0.505824	328	0.154395
SYNRG_ENST00000346661.4	0.0338919	0.279429	328	0.121432
SYNRG_ENST00000378189.1	0.154551	0.983454	328	0.519927
SYNRG_ENST00000394378.2	-0.00677555	0.124028	328	0.102666
SYNRG_ENST00000394379.3	0.121244	0.906653	328	0.322549
SYNRG_ENST00000421408.2	0.137201	0.956548	328	0.406679
SYNRG_ENST00000427923.1	0.0816954	0.692799	328	0.196065
SYNRG_ENST00000502449.2	0.0239252	0.203682	328	0.112471
SYNRG_ENST00000508220.1	0.0375964	0.302491	328	0.124117
SYNRG_ENST00000585472.1	0.0358439	0.27352	328	0.120804
SYNRG_ENST00000585689.1	0.0689332	0.60148	328	0.17275
SYNRG_ENST00000587040.1	0.0710747	0.622213	328	0.177429
SYNRG_ENST00000588194.1	0.0356361	0.287778	328	0.122361
SYNRG_ENST00000590102.1	0.0655767	0.577111	328	0.167487
SYNRG_ENST00000591288.1	0.0471482	0.398356	328	0.137044
SYNRG_ENST00000591427.1	0.0305185	0.256764	328	0.118733
CACNG3_ENST00000005284.3	-0.0886007	0.778801	328	0.230945
TMEM132A_ENST00000005286.4	-0.0352957	0.235819	328	0.116085
TMEM132A_ENST00000453848.2	-0.047671	0.33554	328	0.127938
TMEM132A_ENST00000534983.1	-0.0099361	0.131798	328	0.103629
TMEM132A_ENST00000535480.1	-0.118648	0.860926	328	0.28138
TMEM132A_ENST00000536409.1	-0.00662253	0.122925	328	0.102535
TMEM132A_ENST00000536928.1	-0.0509913	0.409981	328	0.138576
TMEM132A_ENST00000537065.1	-0.0691162	0.557513	328	0.163904
TMEM132A_ENST00000537110.1	-0.0102904	0.133607	328	0.103853
TMEM132A_ENST00000538090.1	-0.0230469	0.198512	328	0.111837
TMEM132A_ENST00000539899.1	0.0253189	0.221174	328	0.114625
TMEM132A_ENST00000540112.1	0.0244759	0.183088	328	0.109928
TMEM132A_ENST00000540276.1	0.0117636	0.14452	328	0.105136
TMEM132A_ENST00000543732.1	-0.0628776	0.455944	328	0.145664
TMEM132A_ENST00000544065.1	0.0269385	0.225969	328	0.115004
TMEM132A_ENST00000544098.1	-0.0201564	0.175834	328	0.109058
AP2B1_ENST00000262325.7	0.112624	0.86319	328	0.283347
AP2B1_ENST00000312678.8	0.210286	0.99853	328	0.763818
AP2B1_ENST00000537622.2	0.017706	0.171063	328	0.108468
AP2B1_ENST00000538556.1	0.0755529	0.640481	328	0.182007
AP2B1_ENST00000545922.2	-0.100399	0.842324	328	0.266836
AP2B1_ENST00000587805.1	0.0432056	0.344578	328	0.128794
AP2B1_ENST00000588093.1	-0.150703	0.971316	328	0.457391
AP2B1_ENST00000588116.1	0.0404732	0.325086	328	0.126786
AP2B1_ENST00000588493.1	0.049187	0.40754	328	0.138261
AP2B1_ENST00000589344.1	-0.00604357	0.119607	328	0.102142
AP2B1_ENST00000589774.1	0.044431	0.362725	328	0.131403
AP2B1_ENST00000590432.1	0.0306311	0.252947	328	0.118402
AP2B1_ENST00000590538.1	-0.00546506	0.119214	328	0.102112
AP2B1_ENST00000591561.1	0.0310699	0.248954	328	0.117765
AP2B1_ENST00000591610.1	0.0761943	0.665698	328	0.188255
AP2B1_ENST00000592167.1	-0.0379471	0.315978	328	0.125609
AP2B1_ENST00000592191.1	-0.0883657	0.764672	328	0.224175
AP2B1_ENST00000592545.1	0.13688	0.961269	328	0.420181
AP2B1_ENST00000593014.1	-0.00752986	0.126528	328	0.102975
TAC1_ENST00000319273.5	-0.00347481	0.111033	328	0.101203
TAC1_ENST00000346867.4	-0.00554566	0.118383	328	0.102064
TAC1_ENST00000350485.4	-0.104919	0.856929	328	0.278715
TAC1_ENST00000491437.1	-0.0061626	0.12161	328	0.102384
TAC1_ENST00000495916.1	0.0365924	0.29828	328	0.1237
ZNF263_ENST00000219069.5	0.017471	0.173437	328	0.108763
ZNF263_ENST00000538765.1	0.039715	0.322883	328	0.126422
ZNF263_ENST00000572123.1	0.0454025	0.382483	328	0.134483
ZNF263_ENST00000572748.1	0.00973633	0.136328	328	0.104119
ZNF263_ENST00000573578.1	0.0372536	0.297603	328	0.123549
ZNF263_ENST00000573951.1	-0.0493103	0.37281	328	0.133
ZNF263_ENST00000574253.1	-0.0780541	0.672113	328	0.190387
ZNF263_ENST00000574674.1	0.0734038	0.626775	328	0.178428
ZNF263_ENST00000575332.1	0.0394534	0.317339	328	0.125756
ZNF263_ENST00000575823.1	-0.0272201	0.233628	328	0.115832
CX3CL1_ENST00000006053.6	-0.119605	0.885239	328	0.301642
CX3CL1_ENST00000563383.1	-0.0246935	0.214168	328	0.113796
CX3CL1_ENST00000564948.1	0.0190028	0.181092	328	0.109667
CX3CL1_ENST00000565912.1	-0.0490761	0.396461	328	0.136737
SPATA20_ENST00000006658.6	0.000782881	0.102465	328	0.100216
SPATA20_ENST00000356488.4	-0.0368937	0.302603	328	0.124151
SPATA20_ENST00000393244.3	0.0134492	0.151192	328	0.105947
SPATA20_ENST00000502911.1	-0.0833558	0.721019	328	0.205456
SPATA20_ENST00000503063.1	-0.0775307	0.645242	328	0.183109
SPATA20_ENST00000503127.1	0.0912422	0.789525	328	0.235741
SPATA20_ENST00000504265.1	0.0262854	0.224149	328	0.114883
SPATA20_ENST00000504271.1	-0.0885507	0.736552	328	0.211691
SPATA20_ENST00000504334.1	0.0235601	0.206198	328	0.11279
SPATA20_ENST00000505085.1	-0.0367714	0.304405	328	0.124358
SPATA20_ENST00000505336.1	-0.0634291	0.535859	328	0.159982
SPATA20_ENST00000505456.2	-0.00719437	0.126399	328	0.102961
SPATA20_ENST00000505559.1	-0.0216998	0.197819	328	0.111707
SPATA20_ENST00000505656.1	-0.0657255	0.544076	328	0.161556
SPATA20_ENST00000508528.1	-0.0101553	0.138547	328	0.104437
SPATA20_ENST00000508598.1	0.0058991	0.121301	328	0.102329
SPATA20_ENST00000510917.1	0.0637988	0.556111	328	0.163763
SPATA20_ENST00000511347.1	-0.00469747	0.116047	328	0.101744
SPATA20_ENST00000511605.1	-0.0609923	0.502221	328	0.153535
SPATA20_ENST00000511845.1	-0.0636582	0.541677	328	0.161054
SPATA20_ENST00000511937.1	-0.10359	0.827298	328	0.255967
SPATA20_ENST00000512181.1	-0.0748282	0.623249	328	0.177608
SPATA20_ENST00000512416.1	0.0376658	0.307022	328	0.124656
SPATA20_ENST00000513618.1	-0.0405635	0.335744	328	0.127958
SPATA20_ENST00000515526.1	0.116342	0.921605	328	0.34057
SPATA20_ENST00000515619.1	-0.0523526	0.43231	328	0.14189
CACNA1G_ENST00000352832.5	0.11385	0.886172	328	0.30259
CACNA1G_ENST00000354983.4	-0.0547486	0.46248	328	0.1467
CACNA1G_ENST00000358244.5	0.114239	0.899209	328	0.314516
CACNA1G_ENST00000359106.5	0.0278171	0.229221	328	0.115434
CACNA1G_ENST00000360761.4	0.114343	0.892067	328	0.307221
CACNA1G_ENST00000416767.4	0.0610143	0.533823	328	0.159669
CACNA1G_ENST00000429973.2	0.0375436	0.315126	328	0.125474
CACNA1G_ENST00000442258.2	0.0404708	0.33145	328	0.127369
CACNA1G_ENST00000502264.1	0.0458877	0.374806	328	0.133271
CACNA1G_ENST00000503436.1	0.0858928	0.732143	328	0.209833
CACNA1G_ENST00000503485.1	0.0662737	0.593465	328	0.171186
CACNA1G_ENST00000503607.1	-0.000406796	0.101321	328	0.100123
CACNA1G_ENST00000505165.1	0.133231	0.963138	328	0.425661
CACNA1G_ENST00000506406.1	0.0750313	0.67516	328	0.19115
CACNA1G_ENST00000506520.1	0.0990895	0.828832	328	0.257308
CACNA1G_ENST00000507510.2	-0.0850592	0.749992	328	0.21766
CACNA1G_ENST00000507609.1	0.123052	0.932403	328	0.358571
CACNA1G_ENST00000507896.1	0.00671033	0.123999	328	0.102661
CACNA1G_ENST00000510115.1	-0.0461912	0.384504	328	0.134844
CACNA1G_ENST00000510366.1	-0.010605	0.136344	328	0.104121
CACNA1G_ENST00000511768.1	0.0969457	0.826809	328	0.255904
CACNA1G_ENST00000513689.2	0.0381872	0.164297	328	0.107588
CACNA1G_ENST00000513964.1	0.161127	0.983223	328	0.517601
CACNA1G_ENST00000514079.1	0.106919	0.869563	328	0.287497
CACNA1G_ENST00000514181.1	-0.00801038	0.128862	328	0.103313
CACNA1G_ENST00000514717.1	0.122703	0.929232	328	0.353758
CACNA1G_ENST00000515165.1	0.114499	0.915423	328	0.333026
CACNA1G_ENST00000570567.1	0.0820278	0.698299	328	0.198245
TNFRSF12A_ENST00000326577.4	-0.0959768	0.694658	328	0.197029
TNFRSF12A_ENST00000341627.5	-0.0698762	0.534956	328	0.159844
TNFRSF12A_ENST00000571351.1	-0.0783626	0.593673	328	0.171229
TNFRSF12A_ENST00000573001.1	0.00322867	0.111022	328	0.101203
TNFRSF12A_ENST00000574699.1	-0.0755719	0.6003	328	0.172727
TNFRSF12A_ENST00000575124.1	-0.0904253	0.684407	328	0.193745
TNFRSF12A_ENST00000575836.1	0.00632838	0.122115	328	0.102437
DLX6_ENST00000007660.5	0.0827733	0.646122	328	0.183367
DLX6_ENST00000493273.2	0.0340081	0.274097	328	0.120822
DLX6_ENST00000518156.2	0.065275	0.516509	328	0.156546
DLX6_ENST00000555308.1	0.0613746	0.49867	328	0.153138
MAP3K9_ENST00000381250.4	-0.0762942	0.604916	328	0.173511
MAP3K9_ENST00000553414.1	-0.103786	0.819874	328	0.251821
MAP3K9_ENST00000554024.1	-0.130389	0.941652	328	0.374411
MAP3K9_ENST00000554146.1	0.0682725	0.579441	328	0.168056
MAP3K9_ENST00000554752.2	-0.129653	0.865965	328	0.285121
MAP3K9_ENST00000555993.2	-0.0808118	0.681806	328	0.193215
RALA_ENST00000005257.2	-0.0601389	0.491017	328	0.151664
RALA_ENST00000434466.1	-0.141142	0.970037	328	0.451099
RALA_ENST00000436179.1	-0.0277424	0.233142	328	0.115779
RALA_ENST00000466491.1	0.0237358	0.207785	328	0.112956
RALA_ENST00000468201.1	-0.0755882	0.658254	328	0.186413
BAIAP2L1_ENST00000005260.8	-0.130772	0.843144	328	0.267459
BAIAP2L1_ENST00000462558.1	0.0490711	0.412904	328	0.138941
BAIAP2L1_ENST00000473569.1	-0.0881654	0.722118	328	0.205914
BAIAP2L1_ENST00000479789.1	0.0628633	0.52674	328	0.1584
BAIAP2L1_ENST00000480580.1	0.0104343	0.139664	328	0.104554
JHDM1D_ENST00000006967.5	-0.0159121	0.166145	328	0.107833
JHDM1D_ENST00000397560.2	-0.043721	0.328123	328	0.127053
JHDM1D_ENST00000472616.1	-0.0948021	0.749901	328	0.21766
JHDM1D_ENST00000478996.1	-0.0600985	0.495629	328	0.15248
ETV1_ENST00000242066.5	0.00249113	0.108309	328	0.100854
ETV1_ENST00000343495.5	0.0397495	0.32504	328	0.126777
ETV1_ENST00000399357.3	-0.0767895	0.656841	328	0.186048
ETV1_ENST00000403527.1	-0.0288669	0.235378	328	0.116045
ETV1_ENST00000403685.1	-0.0252635	0.207094	328	0.112909
ETV1_ENST00000405192.2	0.0310664	0.226683	328	0.115098
ETV1_ENST00000405218.2	0.0596838	0.478611	328	0.149156
ETV1_ENST00000405358.4	0.0684878	0.497967	328	0.153012
ETV1_ENST00000420159.2	-0.0927827	0.769919	328	0.226687
ETV1_ENST00000421381.1	0.057994	0.491479	328	0.151664
ETV1_ENST00000430479.1	0.0590048	0.419849	328	0.139962
ETV1_ENST00000431887.1	-0.0552381	0.458041	328	0.145987
ETV1_ENST00000433547.1	0.0279342	0.213583	328	0.113732
ETV1_ENST00000438956.1	0.0627723	0.550145	328	0.162637
ETV1_ENST00000443137.1	-0.00726618	0.12438	328	0.102694
ETV1_ENST00000443608.1	0.00494202	0.117381	328	0.101944
ETV1_ENST00000460438.1	0.0879964	0.740564	328	0.213391
ETV1_ENST00000472931.2	-0.0314986	0.251264	328	0.118127
ETV1_ENST00000476355.1	-0.0446251	0.337975	328	0.128216
ETV1_ENST00000476720.2	-0.045913	0.367149	328	0.132149
ETV1_ENST00000483075.1	0.0839551	0.676968	328	0.191723
ETV1_ENST00000485475.1	0.0339248	0.285499	328	0.122154
ETV1_ENST00000493831.1	-0.0206032	0.178995	328	0.109457
ETV1_ENST00000497115.1	0.00319063	0.110619	328	0.101176
AGK_ENST00000355413.4	0.0473739	0.347433	328	0.129252
AGK_ENST00000465241.1	0.0465311	0.355577	328	0.130318
AGK_ENST00000473247.1	0.0743232	0.597757	328	0.172151
AGK_ENST00000473884.1	0.109895	0.860407	328	0.281055
AGK_ENST00000492693.1	0.0456282	0.344223	328	0.128755
AGK_ENST00000494053.1	-0.0417556	0.337677	328	0.128178
AGK_ENST00000494688.1	-0.0180042	0.180038	328	0.109554
AGK_ENST00000495028.1	-0.134252	0.954983	328	0.403687
AGK_ENST00000496273.1	-0.056389	0.467001	328	0.147472
AGK_ENST00000496784.1	0.0294164	0.231874	328	0.115659
AGK_ENST00000535825.1	0.11099	0.891464	328	0.306793
ALDH3B1_ENST00000007633.8	-0.131573	0.947356	328	0.386323
ALDH3B1_ENST00000316367.6	0.0077886	0.12873	328	0.103295
ALDH3B1_ENST00000342456.6	-0.117977	0.903426	328	0.318885
ALDH3B1_ENST00000433100.1	-0.0313706	0.258781	328	0.118983
ALDH3B1_ENST00000434449.1	-0.140029	0.964177	328	0.428965
ALDH3B1_ENST00000525518.1	0.00297205	0.110284	328	0.101101
ALDH3B1_ENST00000526609.1	-0.000993246	0.103292	328	0.10032
ALDH3B1_ENST00000527179.1	0.0420345	0.347707	328	0.129307
ALDH3B1_ENST00000527514.1	-0.0736193	0.640721	328	0.182007
ALDH3B1_ENST00000529232.1	-0.117723	0.910524	328	0.326923
ALDH3B1_ENST00000530046.1	-0.0705045	0.622164	328	0.177429
ALDH3B1_ENST00000531459.1	-0.067918	0.579833	328	0.168158
ALDH3B1_ENST00000539229.1	-0.0537688	0.435227	328	0.142326
TTC22_ENST00000371274.4	-0.0534586	0.42135	328	0.140226
TTC22_ENST00000371276.4	-0.127323	0.899128	328	0.314404
TTC22_ENST00000448308.2	-0.0812512	0.681287	328	0.193198
TTC22_ENST00000474654.1	-0.0254442	0.215345	328	0.113916
TTC22_ENST00000488771.1	-0.0495963	0.382514	328	0.134483
PHTF2_ENST00000248550.7	0.0753289	0.65803	328	0.186252
PHTF2_ENST00000275575.7	-0.0240919	0.208622	328	0.113067
PHTF2_ENST00000307305.8	0.0791858	0.631903	328	0.179883
PHTF2_ENST00000415251.2	-0.0414017	0.343207	328	0.128704
PHTF2_ENST00000416283.2	0.01263	0.147411	328	0.105518
PHTF2_ENST00000422959.2	0.0258782	0.227518	328	0.115218
PHTF2_ENST00000424760.1	-0.0308509	0.257213	328	0.11882
PHTF2_ENST00000450574.1	-0.061856	0.523589	328	0.157743
PHTF2_ENST00000454592.1	0.00433189	0.114318	328	0.101494
PHTF2_ENST00000468351.1	0.0166367	0.169432	328	0.10824
PHTF2_ENST00000470215.1	0.0786885	0.679865	328	0.192687
PHTF2_ENST00000479515.1	0.100511	0.775118	328	0.229126
CCL26_ENST00000005180.4	-0.094085	0.753474	328	0.21873
CCL26_ENST00000394905.2	0.0573465	0.492091	328	0.15173
FARP2_ENST00000264042.3	-0.0378766	0.28741	328	0.122329
FARP2_ENST00000373287.4	-0.0621305	0.502011	328	0.153498
FARP2_ENST00000412332.1	-0.0433798	0.346703	328	0.129081
FARP2_ENST00000413432.2	0.0915174	0.705672	328	0.20053
FARP2_ENST00000418082.1	-0.0589243	0.50282	328	0.153649
FARP2_ENST00000422951.1	0.004733	0.115615	328	0.101723
FARP2_ENST00000444371.1	0.0134926	0.153399	328	0.106321
FARP2_ENST00000445489.1	0.0403195	0.329337	328	0.127155
FARP2_ENST00000464142.1	0.0584782	0.508496	328	0.15486
FARP2_ENST00000467260.1	-0.0993197	0.833923	328	0.261076
FARP2_ENST00000470617.1	-0.0247795	0.20868	328	0.113068
FARP2_ENST00000471447.1	-0.0490087	0.343418	328	0.128713
FARP2_ENST00000473082.1	0.0534465	0.454314	328	0.145349
FARP2_ENST00000473510.1	-0.0917802	0.784977	328	0.233767
FARP2_ENST00000476799.1	-0.0670898	0.549155	328	0.16248
FARP2_ENST00000478489.1	0.0122945	0.147205	328	0.105513
FARP2_ENST00000479427.1	0.0170748	0.162646	328	0.10741
FARP2_ENST00000485051.1	0.0228439	0.178727	328	0.109427
FARP2_ENST00000486736.1	-0.0986039	0.825696	328	0.255226
FARP2_ENST00000491425.1	0.0304522	0.258738	328	0.118983
FARP2_ENST00000492868.1	0.0344826	0.291303	328	0.122726
FARP2_ENST00000496470.1	0.0131142	0.152519	328	0.106161
FARP2_ENST00000545004.1	0.144292	0.965999	328	0.435018
USH1C_ENST00000005226.7	-0.0643522	0.490561	328	0.151616
USH1C_ENST00000318024.4	-0.0253681	0.192307	328	0.110949
USH1C_ENST00000526181.1	-0.00410711	0.114638	328	0.10154
USH1C_ENST00000526313.1	0.0098858	0.134965	328	0.103943
USH1C_ENST00000527020.1	0.00226084	0.106411	328	0.100665
USH1C_ENST00000527551.1	-0.0539556	0.432149	328	0.141867
USH1C_ENST00000527720.1	0.0695119	0.573446	328	0.167095
USH1C_ENST00000529563.1	-0.069865	0.562431	328	0.164919
USH1C_ENST00000530700.1	-0.0631004	0.464639	328	0.146999
USH1C_ENST00000534556.1	-0.0242516	0.196175	328	0.11148
GGCT_ENST00000005374.6	0.0430114	0.340527	328	0.12842
GGCT_ENST00000275428.4	-0.056996	0.428206	328	0.141396
GGCT_ENST00000409144.1	0.0506772	0.384297	328	0.134808
GGCT_ENST00000409390.1	-0.0397181	0.331346	328	0.127359
GGCT_ENST00000409436.1	-0.0067847	0.123385	328	0.102568
GGCT_ENST00000426081.1	-0.0259185	0.227701	328	0.115249
GGCT_ENST00000440082.1	-0.0829047	0.678728	328	0.192171
GGCT_ENST00000447901.1	-0.0123069	0.146353	328	0.105475
GGCT_ENST00000598361.1	0.0402874	0.334223	328	0.127784
DBF4_ENST00000265728.1	0.0494742	0.397284	328	0.136862
DBF4_ENST00000413643.1	0.0381641	0.302698	328	0.124163
DBF4_ENST00000430279.1	0.0174921	0.174124	328	0.108847
DBF4_ENST00000431138.1	-0.0134028	0.151875	328	0.106077
DBF4_ENST00000486925.1	0.0141769	0.156493	328	0.106702
DBF4_ENST00000495067.1	0.0502349	0.41463	328	0.139141
DBF4_ENST00000498144.1	0.0235627	0.202445	328	0.112282
DBF4_ENST00000498726.1	0.00215176	0.106983	328	0.100724
TBXA2R_ENST00000375190.4	0.286457	0.999991	328	0.953464
TBXA2R_ENST00000411851.3	0.202394	0.998715	328	0.773123
TBXA2R_ENST00000587717.1	0.0731396	0.614258	328	0.175604
TBXA2R_ENST00000589966.1	0.0167041	0.168876	328	0.108148
IFRD1_ENST00000005558.4	-0.0672991	0.554718	328	0.163589
IFRD1_ENST00000403825.3	-0.0355857	0.275559	328	0.12105
IFRD1_ENST00000417662.1	-0.10811	0.876984	328	0.294502
IFRD1_ENST00000421296.1	-0.0325079	0.265819	328	0.119876
IFRD1_ENST00000429071.1	0.0384098	0.309763	328	0.124851
IFRD1_ENST00000432734.1	-0.0343973	0.281693	328	0.121699
IFRD1_ENST00000440625.1	0.000831854	0.102674	328	0.100242
IFRD1_ENST00000443101.2	-0.0145647	0.160847	328	0.107206
IFRD1_ENST00000445335.1	-0.0907732	0.781257	328	0.232035
IFRD1_ENST00000462155.2	-0.00732323	0.127238	328	0.103074
IFRD1_ENST00000466459.1	-0.0282424	0.238538	328	0.116465
IFRD1_ENST00000470441.1	-0.0771699	0.676627	328	0.19167
IFRD1_ENST00000476927.1	-0.0512276	0.432129	328	0.141867
IFRD1_ENST00000486688.1	0.0122092	0.14807	328	0.105588
IFRD1_ENST00000489994.1	-0.064822	0.57111	328	0.166687
IFRD1_ENST00000535603.1	-0.0331921	0.267618	328	0.120122
LGALS14_ENST00000360675.3	0.015524	0.165955	328	0.107816
LGALS14_ENST00000392052.3	0.0236067	0.211969	328	0.113546
LGALS14_ENST00000601802.1	-0.00293226	0.110138	328	0.101081
COX10_ENST00000261643.3	0.0304417	0.246514	328	0.117533
COX10_ENST00000429152.2	0.102815	0.832493	328	0.25997
COX10_ENST00000536205.1	0.0504141	0.424522	328	0.140732
COX10_ENST00000537334.1	-0.061208	0.534336	328	0.159773
COX10_ENST00000580561.1	-0.061208	0.534336	328	0.159773
COX10_ENST00000581931.1	0.0504141	0.424522	328	0.140732
GTF2IRD1_ENST00000265755.3	0.0781312	0.594373	328	0.171326
GTF2IRD1_ENST00000424337.2	-0.00125736	0.103635	328	0.100344
GTF2IRD1_ENST00000455841.2	-0.0336129	0.265184	328	0.119757
GTF2IRD1_ENST00000470715.1	0.00238068	0.107209	328	0.10073
GTF2IRD1_ENST00000476977.1	0.0136587	0.148161	328	0.105605
GTF2IRD1_ENST00000486086.1	-0.102851	0.819176	328	0.251392
GTF2IRD1_ENST00000489094.1	0.0765329	0.652436	328	0.185043
PAF1_ENST00000221265.3	0.0646302	0.525274	328	0.158117
PAF1_ENST00000221266.7	0.0433261	0.359467	328	0.130918
PAF1_ENST00000416728.3	-0.0588355	0.49979	328	0.153381
PAF1_ENST00000595379.1	-0.0218701	0.198991	328	0.111878
PAF1_ENST00000595564.1	-0.00547449	0.118626	328	0.102064
PAF1_ENST00000595797.1	-0.0173813	0.173779	328	0.108779
PAF1_ENST00000597365.1	-0.0266428	0.231021	328	0.115583
PAF1_ENST00000598127.1	-0.0260177	0.224751	328	0.11495
PAF1_ENST00000598594.1	-0.0572935	0.495215	328	0.152331
VPS41_ENST00000265745.9	-0.0200179	0.184964	328	0.110127
VPS41_ENST00000310301.4	-0.0379263	0.290355	328	0.12271
VPS41_ENST00000395969.2	-0.0988544	0.822654	328	0.253581
VPS41_ENST00000413141.1	0.00138223	0.104608	328	0.100457
VPS41_ENST00000414632.1	-0.0579368	0.486873	328	0.150966
VPS41_ENST00000418457.2	-0.0822617	0.719119	328	0.204578
VPS41_ENST00000439468.1	0.0573823	0.491896	328	0.151677
VPS41_ENST00000448833.1	0.0131823	0.15168	328	0.10604
VPS41_ENST00000457055.1	-0.0297712	0.254682	328	0.118571
VPS41_ENST00000462429.1	0.0539841	0.463708	328	0.146871
VPS41_ENST00000466017.1	-0.0215209	0.200567	328	0.112033
VPS41_ENST00000482217.1	-0.0121218	0.146402	328	0.105475
VPS41_ENST00000485955.1	0.0217556	0.20239	328	0.11228
VPS41_ENST00000490924.1	-0.0584457	0.492706	328	0.151808
ARHGAP44_ENST00000262444.9	-0.05639	0.475458	328	0.14867
ARHGAP44_ENST00000340825.3	-0.0546027	0.438764	328	0.142964
ARHGAP44_ENST00000379672.5	-0.0536899	0.455735	328	0.145648
ARHGAP44_ENST00000538915.2	-0.0474876	0.391554	328	0.135994
ARHGAP44_ENST00000544416.2	-0.0321461	0.265252	328	0.119779
ARHGAP44_ENST00000578087.1	-0.0784004	0.694783	328	0.197066
ARHGAP44_ENST00000578442.1	-0.06707	0.584311	328	0.168982
ARHGAP44_ENST00000580768.1	-0.0184793	0.17845	328	0.109387
ARHGAP44_ENST00000581437.1	0.00561964	0.119894	328	0.10219
ARHGAP44_ENST00000583608.1	0.0202099	0.184962	328	0.110127
ARHGAP44_ENST00000584974.1	-0.041721	0.33805	328	0.128219
ELAC2_ENST00000338034.4	0.0993223	0.822868	328	0.253668
ELAC2_ENST00000395962.2	0.0903399	0.775097	328	0.229115
ELAC2_ENST00000426905.3	0.0551686	0.472998	328	0.148349
ELAC2_ENST00000446899.1	0.103085	0.85087	328	0.273142
ELAC2_ENST00000465825.1	0.036881	0.300729	328	0.124002
ELAC2_ENST00000476042.1	-0.0252981	0.221568	328	0.114669
ELAC2_ENST00000480891.1	0.0152244	0.162906	328	0.107414
ELAC2_ENST00000484122.1	0.0280069	0.237202	328	0.116286
ELAC2_ENST00000487229.2	-0.0376288	0.310658	328	0.124921
ELAC2_ENST00000491478.1	0.0374907	0.312093	328	0.125128
ELAC2_ENST00000492559.1	0.0130042	0.151333	328	0.105958
ELAC2_ENST00000578071.1	0.0582121	0.506968	328	0.154624
ELAC2_ENST00000578104.1	0.0443748	0.36677	328	0.132099
ELAC2_ENST00000578991.1	0.0427967	0.354653	328	0.13026
ELAC2_ENST00000580504.1	-0.0246787	0.21349	328	0.113732
ELAC2_ENST00000581499.2	0.0859104	0.752341	328	0.218263
ELAC2_ENST00000583371.1	-0.036634	0.307642	328	0.124691
ELAC2_ENST00000584650.1	0.0328965	0.272546	328	0.120711
ELAC2_ENST00000609101.1	0.00791215	0.12902	328	0.103322
ELAC2_ENST00000609345.1	0.0784164	0.679694	328	0.192627
ELAC2_ENST00000609757.1	0.0350773	0.29338	328	0.122931
SCIN_ENST00000297029.5	-0.0418206	0.345772	328	0.128987
SCIN_ENST00000341757.5	-0.0129946	0.151258	328	0.105953
SCIN_ENST00000417018.1	0.0269618	0.235016	328	0.116019
SCIN_ENST00000436854.1	0.0546535	0.471299	328	0.1481
SCIN_ENST00000445618.2	0.00483572	0.117059	328	0.101891
SCIN_ENST00000473722.1	0.05497	0.464058	328	0.146905
SCIN_ENST00000476649.1	0.0232515	0.209359	328	0.11315
SCIN_ENST00000486980.1	-0.0178487	0.178944	328	0.109447
SCIN_ENST00000518849.1	0.0192204	0.18354	328	0.109983
SCIN_ENST00000519209.1	-0.022428	0.205719	328	0.112699
SCIN_ENST00000523729.1	0.0279027	0.240254	328	0.116669
ARSD_ENST00000217890.6	-0.113222	0.870411	328	0.288415
ARSD_ENST00000381154.1	-0.151483	0.964103	328	0.428965
ARSD_ENST00000458014.1	0.0475578	0.400154	328	0.13727
ARSD_ENST00000481340.1	-0.0965076	0.786508	328	0.234469
ARSD_ENST00000494870.1	-0.1269	0.920597	328	0.339134
ARSD_ENST00000495294.1	-0.117762	0.89003	328	0.305302
ARSD_ENST00000559324.1	-0.0858037	0.738891	328	0.212564
PNPLA4_ENST00000381042.4	-0.0824979	0.680803	328	0.193022
PNPLA4_ENST00000442940.1	-0.0565472	0.45387	328	0.145331
PNPLA4_ENST00000444736.1	0.0168761	0.17067	328	0.108456
PNPLA4_ENST00000537427.1	0.130188	0.95626	328	0.406393
MYH13_ENST00000252172.4	0.122698	0.868723	328	0.286951
MYH13_ENST00000418404.3	0.0298839	0.254419	328	0.118531
ADIPOR2_ENST00000357103.4	0.0818109	0.712449	328	0.202765
ADIPOR2_ENST00000535774.1	-0.0504107	0.422988	328	0.140529
ADIPOR2_ENST00000537190.1	0.0840568	0.727509	328	0.208063
ADIPOR2_ENST00000537545.1	0.0241945	0.2152	328	0.113905
ADIPOR2_ENST00000540974.1	0.0741526	0.658763	328	0.186461
ADIPOR2_ENST00000543456.1	-0.00716083	0.125835	328	0.10291
ADIPOR2_ENST00000544470.1	0.107404	0.874388	328	0.291909
CDKL3_ENST00000265334.4	0.0258821	0.22109	328	0.114614
CDKL3_ENST00000435211.1	0.11989	0.921402	328	0.340468
CDKL3_ENST00000435240.2	0.0235749	0.204774	328	0.112581
CDKL3_ENST00000518990.1	-0.079039	0.678004	328	0.191905
CDKL3_ENST00000519312.1	-0.018122	0.174972	328	0.10892
CDKL3_ENST00000520592.1	0.0394545	0.312361	328	0.12513
CDKL3_ENST00000520693.1	0.0235749	0.204774	328	0.112581
CDKL3_ENST00000521118.1	0.053928	0.462455	328	0.1467
CDKL3_ENST00000521755.1	0.0394708	0.322027	328	0.126274
CDKL3_ENST00000522501.1	0.00344538	0.111689	328	0.101267
CDKL3_ENST00000523054.1	-0.0236869	0.20799	328	0.112972
CDKL3_ENST00000523832.1	0.0766799	0.667114	328	0.18876
CDKL3_ENST00000536186.1	0.0230217	0.205431	328	0.112668
CDKL3_ENST00000609383.1	-0.0233825	0.205319	328	0.112654
CDKL3_ENST00000609654.1	0.0420998	0.349487	328	0.129582
UPP2_ENST00000005756.4	0.0442484	0.375546	328	0.133316
UPP2_ENST00000409859.4	-0.0224565	0.203967	328	0.112506
UPP2_ENST00000460456.1	0.14238	0.973764	328	0.465204
UPP2_ENST00000489438.1	0.00739293	0.127507	328	0.103098
UPP2_ENST00000605860.1	-0.00588356	0.121689	328	0.102399
PRSS21_ENST00000005995.3	-0.0188274	0.179494	328	0.109512
PRSS21_ENST00000450020.3	-0.0334652	0.274142	328	0.120822
PRSS21_ENST00000455114.1	-0.0252464	0.217882	328	0.114189
PRSS21_ENST00000570594.1	-0.0192361	0.182205	328	0.109815
PRSS21_ENST00000570629.1	0.010232	0.137637	328	0.104286
PRSS21_ENST00000571141.1	-0.0314166	0.260539	328	0.119226
PRSS21_ENST00000574265.1	-0.0597026	0.509721	328	0.155088
PRSS21_ENST00000574813.1	-0.0420412	0.345769	328	0.128987
PRSS21_ENST00000575199.1	-0.0518218	0.428233	328	0.141396
PRSS21_ENST00000575739.1	0.015819	0.163616	328	0.107485
PRSS21_ENST00000577043.1	-0.0268825	0.228518	328	0.115363
MARK4_ENST00000262891.4	0.088815	0.738534	328	0.212524
MARK4_ENST00000300843.4	0.0210536	0.191632	328	0.110891
MARK4_ENST00000587566.1	0.0651704	0.572404	328	0.166791
MARK4_ENST00000588533.1	0.012943	0.151091	328	0.105941
MARK4_ENST00000588621.1	0.136649	0.96568	328	0.434192
MARK4_ENST00000590897.1	-0.0804783	0.700167	328	0.198717
MARK4_ENST00000590909.1	0.0675114	0.576768	328	0.167483
MARK4_ENST00000592207.1	0.0496109	0.411474	328	0.138779
MARK4_ENST00000592762.1	0.034965	0.296766	328	0.123487
PROM1_ENST00000447510.2	-0.0412548	0.334529	328	0.127819
PROM1_ENST00000502501.1	-0.0565611	0.474778	328	0.148554
PROM1_ENST00000502943.1	-0.0263958	0.226193	328	0.115026
PROM1_ENST00000503884.1	0.0126468	0.150799	328	0.105908
PROM1_ENST00000504842.1	0.0395943	0.335574	328	0.127938
PROM1_ENST00000505450.1	0.00926513	0.133556	328	0.103846
PROM1_ENST00000508167.1	-0.0273281	0.226621	328	0.115098
PROM1_ENST00000508322.1	-0.0601132	0.509781	328	0.155088
PROM1_ENST00000508940.1	-0.0618928	0.521374	328	0.157462
PROM1_ENST00000510224.1	0.0362362	0.306329	328	0.124577
PROM1_ENST00000511153.1	-0.062915	0.551831	328	0.162992
PROM1_ENST00000511270.1	0.0824185	0.732196	328	0.20984
PROM1_ENST00000512304.2	0.0107392	0.142361	328	0.104909
PROM1_ENST00000513108.1	0.0659635	0.579864	328	0.168158
PROM1_ENST00000513448.1	-0.00165654	0.105318	328	0.100522
PROM1_ENST00000513946.1	-0.0392588	0.315438	328	0.125495
PROM1_ENST00000514693.1	-0.0196419	0.185653	328	0.110224
PROM1_ENST00000514967.1	-0.0265803	0.227482	328	0.115215
PROM1_ENST00000539194.1	0.0471351	0.387201	328	0.135292
PROM1_ENST00000540805.1	0.0386511	0.327898	328	0.127046
PROM1_ENST00000543373.1	0.0337944	0.271277	328	0.120545
CCDC124_ENST00000445755.2	0.0937217	0.769967	328	0.226696
CCDC124_ENST00000596123.1	0.0160604	0.165753	328	0.107802
CCDC124_ENST00000597436.1	0.051592	0.425048	328	0.140838
CCDC124_ENST00000602080.1	0.0100819	0.137957	328	0.104338
CEACAM21_ENST00000187608.9	-0.040681	0.266653	328	0.12002
CEACAM21_ENST00000401445.2	-0.0298121	0.218015	328	0.114189
CEACAM21_ENST00000407170.2	0.00481033	0.110165	328	0.101086
CEACAM21_ENST00000457737.1	0.000478267	0.101164	328	0.100098
CEACAM21_ENST00000461658.2	-0.0633059	0.289247	328	0.12257
CEACAM21_ENST00000482870.2	0.0145087	0.143548	328	0.105017
PAFAH1B1_ENST00000397193.3	-0.00351355	0.111764	328	0.101267
PAFAH1B1_ENST00000397195.5	0.125453	0.923505	328	0.343994
PAFAH1B1_ENST00000451360.2	0.0740922	0.654997	328	0.185618
PAFAH1B1_ENST00000570400.1	0.12272	0.921471	328	0.340499
PAFAH1B1_ENST00000571289.1	0.0717435	0.6261	328	0.178286
PAFAH1B1_ENST00000571495.1	0.104518	0.84939	328	0.272247
PAFAH1B1_ENST00000572915.2	0.0692993	0.592614	328	0.171018
PAFAH1B1_ENST00000574213.1	-0.00432349	0.114732	328	0.101566
PAFAH1B1_ENST00000574468.1	0.0740922	0.654997	328	0.185618
PAFAH1B1_ENST00000574816.1	0.0101433	0.136701	328	0.104122
PAFAH1B1_ENST00000575477.1	-0.0300609	0.252078	328	0.118251
PAFAH1B1_ENST00000576586.1	-0.00078031	0.102478	328	0.100217
PAFAH1B1_ENST00000609078.1	-0.0417279	0.339845	328	0.128373
PAFAH1B1_ENST00000610190.1	0.0375094	0.301878	328	0.124084
NOS2_ENST00000313735.6	0.0636052	0.534379	328	0.159776
DNAH9_ENST00000262442.4	0.00896376	0.13255	328	0.103765
DNAH9_ENST00000396001.2	0.00457729	0.115146	328	0.101646
DNAH9_ENST00000454412.2	0.0306368	0.260852	328	0.119277
DNAH9_ENST00000578834.1	0.019346	0.179617	328	0.109526
DNAH9_ENST00000579406.1	-0.00628697	0.123163	328	0.102549
DNAH9_ENST00000579602.1	-0.0385131	0.326757	328	0.126996
DNAH9_ENST00000579703.1	-0.00287387	0.109183	328	0.100985
DNAH9_ENST00000579813.1	0.0754225	0.664209	328	0.188094
DNAH9_ENST00000579828.1	0.00820393	0.131104	328	0.103549
DNAH9_ENST00000580255.1	0.00890768	0.130419	328	0.103433
DNAH9_ENST00000581682.1	-0.0445398	0.340815	328	0.12842
DNAH9_ENST00000583192.1	-0.0473775	0.410314	328	0.138598
DNAH9_ENST00000584663.1	0.0887952	0.779073	328	0.230948
DNAH9_ENST00000585197.1	0.0533916	0.460203	328	0.146295
DNAH9_ENST00000608377.1	0.0339202	0.29046	328	0.122726
KIAA0100_ENST00000389003.3	0.136245	0.961952	328	0.422282
KIAA0100_ENST00000528896.2	0.146418	0.972288	328	0.459315
KIAA0100_ENST00000544884.1	0.00295248	0.109522	328	0.101011
KIAA0100_ENST00000577261.1	0.138032	0.965267	328	0.432241
KIAA0100_ENST00000577417.1	0.0958454	0.779134	328	0.230964
KIAA0100_ENST00000577580.1	0.0484933	0.395294	328	0.136524
KIAA0100_ENST00000579253.1	0.0467256	0.382478	328	0.134483
KIAA0100_ENST00000579924.2	-0.114573	0.907752	328	0.323951
KIAA0100_ENST00000580395.1	0.0584072	0.478752	328	0.149182
KIAA0100_ENST00000580882.1	0.135778	0.956684	328	0.407208
KIAA0100_ENST00000581064.1	-0.000352742	0.101082	328	0.100093
KIAA0100_ENST00000581267.1	0.0564887	0.490436	328	0.151616
KIAA0100_ENST00000582417.1	0.0185986	0.177722	328	0.109294
KIAA0100_ENST00000582901.1	0.0130299	0.149935	328	0.105809
KIAA0100_ENST00000583403.1	0.0520785	0.435851	328	0.142518
KIAA0100_ENST00000583860.1	-0.0563953	0.447318	328	0.144152
SLC13A2_ENST00000314669.5	0.0135815	0.155434	328	0.106616
SLC13A2_ENST00000444914.3	-0.0126515	0.15055	328	0.105886
SLC13A2_ENST00000459818.2	-0.0199757	0.185917	328	0.110281
SLC13A2_ENST00000537681.1	-0.0199757	0.185917	328	0.110281
SLC13A2_ENST00000541739.2	-0.0281764	0.242834	328	0.117107
SLC13A2_ENST00000545060.1	-0.0521513	0.434289	328	0.142153
SLC13A2_ENST00000577903.1	-0.0197543	0.187471	328	0.11048
SLC13A2_ENST00000579281.1	-0.014602	0.157924	328	0.106943
GAS7_ENST00000323816.4	-0.0907075	0.778508	328	0.230846
GAS7_ENST00000396115.2	0.0124836	0.148451	328	0.105642
GAS7_ENST00000432992.2	-0.0146505	0.156149	328	0.106681
GAS7_ENST00000437099.2	-0.075608	0.455523	328	0.145618
GAS7_ENST00000540214.1	-0.000170498	0.100565	328	0.100066
GAS7_ENST00000542249.1	0.0685286	0.592364	328	0.170994
GAS7_ENST00000578456.1	-0.0710476	0.488999	328	0.151297
GAS7_ENST00000578599.1	0.0586503	0.51743	328	0.156741
GAS7_ENST00000578655.1	-0.125681	0.661634	328	0.187273
GAS7_ENST00000579140.1	-0.159235	0.929158	328	0.353665
GAS7_ENST00000579158.1	-0.00569567	0.118175	328	0.10204
GAS7_ENST00000580043.1	-0.116513	0.659773	328	0.186812
GAS7_ENST00000580811.1	0.0679212	0.59842	328	0.17231
GAS7_ENST00000580865.1	-0.042213	0.315195	328	0.125474
GAS7_ENST00000581112.1	0.0329386	0.276779	328	0.121156
GAS7_ENST00000581871.1	-0.0275127	0.235003	328	0.116019
GAS7_ENST00000583882.1	-0.0842986	0.682776	328	0.19344
GAS7_ENST00000584146.2	-0.0557448	0.440714	328	0.143281
GAS7_ENST00000584389.1	-0.031272	0.26393	328	0.119623
GAS7_ENST00000585266.1	-0.143367	0.711619	328	0.202417
TRAPPC6A_ENST00000006275.4	-0.193659	0.996359	328	0.687853
TRAPPC6A_ENST00000585934.1	-0.178345	0.990887	328	0.588599
TRAPPC6A_ENST00000587818.1	-0.12823	0.931641	328	0.357087
TRAPPC6A_ENST00000588062.1	-0.0722539	0.595918	328	0.171635
TRAPPC6A_ENST00000592647.1	-0.0928471	0.76297	328	0.223402
MATK_ENST00000310132.6	0.140444	0.95637	328	0.406393
MATK_ENST00000395040.2	0.132494	0.925823	328	0.348034
MATK_ENST00000395045.2	0.0340181	0.289108	328	0.122542
MATK_ENST00000585778.1	-0.00462415	0.115314	328	0.101681
MATK_ENST00000587180.1	0.0570359	0.457363	328	0.145854
MATK_ENST00000588983.1	-0.0539797	0.418234	328	0.139725
MATK_ENST00000590028.1	0.00960751	0.136231	328	0.104107
MATK_ENST00000590493.1	0.07394	0.59371	328	0.171229
MATK_ENST00000590821.1	-0.0616634	0.525404	328	0.158165
MATK_ENST00000590849.1	0.0512827	0.440686	328	0.143277
MATK_ENST00000590980.1	0.0216486	0.201197	328	0.112126
MATK_ENST00000591059.1	-0.0344993	0.270938	328	0.12047
MATK_ENST00000592300.1	0.0109934	0.143822	328	0.105061
CEACAM7_ENST00000006724.3	-0.0338113	0.282438	328	0.121771
CEACAM7_ENST00000338196.4	0.0145463	0.158668	328	0.106972
CEACAM7_ENST00000401731.1	-0.040671	0.339795	328	0.128372
CEACAM7_ENST00000599715.1	-0.104833	0.876766	328	0.294427
CEACAM7_ENST00000602225.1	-0.0215191	0.200341	328	0.111996
CD79B_ENST00000006750.3	-0.024038	0.184774	328	0.110104
CD79B_ENST00000349817.2	-0.00926343	0.129956	328	0.103401
CD79B_ENST00000392795.3	-0.0123341	0.138509	328	0.104424
CD79B_ENST00000558969.1	0.0402109	0.258163	328	0.118921
CD79B_ENST00000559358.1	0.00383618	0.11099	328	0.101203
CD79B_ENST00000583260.1	0.0660652	0.427414	328	0.14123
SCN4A_ENST00000435607.1	0.0160341	0.163371	328	0.107461
SCN4A_ENST00000578147.1	-0.00292568	0.109811	328	0.101048
SCN4A_ENST00000581514.1	0.0281156	0.233165	328	0.115786
SCN4A_ENST00000584310.1	-0.102604	0.83393	328	0.261076
ST7L_ENST00000343210.7	-0.0255102	0.221378	328	0.114669
ST7L_ENST00000358039.4	0.00769542	0.127787	328	0.103153
ST7L_ENST00000360743.4	0.022777	0.199825	328	0.111936
ST7L_ENST00000361846.3	0.0494821	0.406469	328	0.138153
ST7L_ENST00000369664.1	-0.0946593	0.809436	328	0.246157
ST7L_ENST00000369666.1	0.0112312	0.143896	328	0.105061
ST7L_ENST00000369668.2	0.135864	0.962143	328	0.422561
ST7L_ENST00000369669.1	0.0465485	0.38514	328	0.134915
ST7L_ENST00000418497.1	-0.00248836	0.1083	328	0.100853
ST7L_ENST00000459630.1	-0.00302682	0.110212	328	0.101098
ST7L_ENST00000463235.1	0.102317	0.840803	328	0.265747
ST7L_ENST00000466360.1	0.0213105	0.196355	328	0.11151
ST7L_ENST00000467335.1	0.0942951	0.76593	328	0.224774
ST7L_ENST00000470519.1	0.0763779	0.671963	328	0.190368
ST7L_ENST00000470683.1	-0.026606	0.224781	328	0.11495
ST7L_ENST00000473206.1	0.105606	0.839613	328	0.264943
ST7L_ENST00000477332.1	0.0540316	0.432618	328	0.141912
ST7L_ENST00000477682.1	0.0512586	0.439249	328	0.143041
ST7L_ENST00000479436.1	0.0562094	0.444441	328	0.143756
ST7L_ENST00000480988.1	-0.0522442	0.438021	328	0.14291
ST7L_ENST00000485753.1	0.0507454	0.418071	328	0.139696
ST7L_ENST00000490067.1	0.122017	0.930031	328	0.355629
ST7L_ENST00000490715.1	0.0225778	0.205793	328	0.112724
ST7L_ENST00000492274.1	0.144819	0.978072	328	0.487518
ST7L_ENST00000495109.2	0.0559938	0.473876	328	0.1484
ST7L_ENST00000497235.1	-0.0864761	0.72217	328	0.20595
ST7L_ENST00000497457.1	-0.0373251	0.3015	328	0.12407
ST7L_ENST00000498197.1	0.0895256	0.753097	328	0.218569
ST7L_ENST00000498383.1	0.000167365	0.100536	328	0.10006
ST7L_ENST00000538187.1	0.0420304	0.348504	328	0.129415
ST7L_ENST00000543570.1	-0.0264281	0.224809	328	0.11495
ST7L_ENST00000544629.1	-0.0335598	0.281725	328	0.121699
TKTL1_ENST00000217905.7	-0.0209652	0.19476	328	0.111249
TKTL1_ENST00000369912.2	0.0490681	0.376214	328	0.133442
TKTL1_ENST00000369915.3	0.00868671	0.132893	328	0.103801
TKTL1_ENST00000426203.1	0.034253	0.271697	328	0.120594
TKTL1_ENST00000426989.1	0.0174468	0.173392	328	0.108757
TKTL1_ENST00000439635.1	0.0234661	0.204581	328	0.112533
TKTL1_ENST00000463884.1	-0.0676741	0.527531	328	0.158507
TKTL1_ENST00000465168.1	0.0728347	0.601846	328	0.172835
TKTL1_ENST00000482044.1	-0.00924737	0.135349	328	0.104014
PAX6_ENST00000241001.8	0.0454936	0.375875	328	0.133377
PAX6_ENST00000379107.2	0.0680953	0.587496	328	0.169644
PAX6_ENST00000379109.2	0.121189	0.927193	328	0.350402
PAX6_ENST00000379111.2	0.0670875	0.572637	328	0.166878
PAX6_ENST00000379115.4	0.103682	0.864798	328	0.284388
PAX6_ENST00000379123.5	0.0857106	0.738244	328	0.212385
PAX6_ENST00000379129.2	-0.0105551	0.141298	328	0.104752
PAX6_ENST00000379132.3	0.0732342	0.634358	328	0.180485
PAX6_ENST00000419022.1	0.0986466	0.817703	328	0.250508
PAX6_ENST00000423822.2	0.0863811	0.765811	328	0.224774
PAX6_ENST00000438681.1	0.095876	0.812074	328	0.247461
PAX6_ENST00000455099.1	0.0244277	0.218593	328	0.114235
PAX6_ENST00000464174.1	0.0293921	0.24156	328	0.116899
PAX6_ENST00000470027.2	0.0693415	0.601523	328	0.17275
PAX6_ENST00000471303.1	0.142428	0.97574	328	0.476631
PAX6_ENST00000474783.1	0.0874182	0.758759	328	0.221448
PAX6_ENST00000481563.1	0.123783	0.934002	328	0.36154
PAX6_ENST00000494377.2	0.0959331	0.817876	328	0.250602
PAX6_ENST00000524853.1	0.0838469	0.729051	328	0.208829
PAX6_ENST00000525535.1	0.101433	0.849445	328	0.27231
PAX6_ENST00000527769.1	0.0379026	0.307023	328	0.124656
PAX6_ENST00000530373.1	0.0213346	0.192361	328	0.110949
PAX6_ENST00000530714.1	0.0889336	0.774551	328	0.228982
PAX6_ENST00000531910.1	-0.0164117	0.171019	328	0.108461
PAX6_ENST00000532175.1	0.0689121	0.614152	328	0.175597
PAX6_ENST00000532916.1	0.0367139	0.302468	328	0.124117
PAX6_ENST00000533156.1	0.122375	0.941814	328	0.374783
PAX6_ENST00000533333.1	0.068889	0.600387	328	0.172727
PAX6_ENST00000534353.1	0.119742	0.936034	328	0.363909
PAX6_ENST00000534390.1	0.110422	0.884659	328	0.301191
RPUSD1_ENST00000007264.2	-0.0115854	0.143869	328	0.105061
RPUSD1_ENST00000561734.1	0.0122864	0.146527	328	0.105475
RPUSD1_ENST00000562070.1	0.0574455	0.490574	328	0.151616
RPUSD1_ENST00000563560.1	0.0136053	0.15567	328	0.106669
RPUSD1_ENST00000565377.1	-0.0368218	0.304706	328	0.12438
RPUSD1_ENST00000565503.1	-0.0310753	0.264678	328	0.119707
RPUSD1_ENST00000565809.1	0.00342132	0.111737	328	0.101267
RPUSD1_ENST00000567114.1	0.00175093	0.10574	328	0.100585
RPUSD1_ENST00000567283.1	-0.00279181	0.109686	328	0.101029
RPUSD1_ENST00000569601.1	0.0737109	0.629336	328	0.179239
RHBDF1_ENST00000262316.6	-0.0277207	0.20409	328	0.112506
RHBDF1_ENST00000417043.1	-0.0411873	0.338974	328	0.128324
RHBDF1_ENST00000419764.1	0.0257422	0.221717	328	0.114669
RHBDF1_ENST00000428730.1	-0.0453571	0.337626	328	0.128174
RHBDF1_ENST00000448893.1	-0.0329489	0.236446	328	0.116198
RHBDF1_ENST00000450643.1	-0.0267981	0.229442	328	0.115438
RHBDF1_ENST00000454039.2	-0.0571367	0.417789	328	0.139631
RHBDF1_ENST00000472390.1	-0.0726205	0.588824	328	0.169995
RHBDF1_ENST00000482904.1	-0.135828	0.92576	328	0.347965
RHBDF1_ENST00000486045.1	-0.0486795	0.343089	328	0.128693
RHBDF1_ENST00000487201.1	-0.00341349	0.109981	328	0.101062
RHBDF1_ENST00000493647.1	-0.0866757	0.642905	328	0.18248
LUC7L_ENST00000293872.8	0.130941	0.946412	328	0.384084
LUC7L_ENST00000337351.4	0.0454849	0.373955	328	0.133198
LUC7L_ENST00000397780.1	-0.043743	0.354822	328	0.13026
LUC7L_ENST00000397783.1	0.145947	0.97426	328	0.468092
LUC7L_ENST00000418978.1	-0.0097482	0.135227	328	0.103993
LUC7L_ENST00000419516.1	0.0424533	0.336414	328	0.12808
LUC7L_ENST00000426094.1	0.0601259	0.496031	328	0.15254
LUC7L_ENST00000428363.1	0.0185277	0.178568	328	0.109397
LUC7L_ENST00000429378.1	-0.0281454	0.239694	328	0.116593
LUC7L_ENST00000430864.1	0.0685091	0.604826	328	0.17349
LUC7L_ENST00000442701.1	0.101606	0.848169	328	0.27126
LUC7L_ENST00000443357.1	-0.0306796	0.250239	328	0.117987
LUC7L_ENST00000464711.1	-0.0214093	0.191962	328	0.11091
LUC7L_ENST00000467552.1	-0.0298349	0.246839	328	0.117555
LUC7L_ENST00000468732.1	-0.053954	0.443669	328	0.143616
LUC7L_ENST00000469109.1	0.0227241	0.20002	328	0.11195
LUC7L_ENST00000490762.1	0.0459151	0.368067	328	0.132336
LUC7L_ENST00000494366.1	-0.0093662	0.135745	328	0.104075
LUC7L_ENST00000494545.1	0.0084276	0.131559	328	0.103571
LUC7L_ENST00000495349.1	-0.0410405	0.325118	328	0.126795
CACNA2D2_ENST00000266039.3	0.0742184	0.661065	328	0.18711
CACNA2D2_ENST00000360963.3	0.0522335	0.420742	328	0.140105
CACNA2D2_ENST00000395083.1	-0.0150846	0.164226	328	0.107572
CACNA2D2_ENST00000423994.2	0.027738	0.235337	328	0.116041
CACNA2D2_ENST00000424201.2	0.0559399	0.450256	328	0.144688
CACNA2D2_ENST00000429770.1	0.0385877	0.310113	328	0.124867
CACNA2D2_ENST00000435965.1	-0.0757917	0.682525	328	0.19344
CACNA2D2_ENST00000479441.1	-0.0374356	0.317231	328	0.125755
CACNA2D2_ENST00000483620.1	-0.0109507	0.140245	328	0.104635
CACNA2D2_ENST00000487413.1	0.0805492	0.687527	328	0.194499
BAIAP3_ENST00000324385.5	-0.127927	0.938708	328	0.367981
BAIAP3_ENST00000397488.2	-0.114056	0.892186	328	0.307251
BAIAP3_ENST00000397489.1	0.115928	0.917172	328	0.335622
BAIAP3_ENST00000421665.2	0.013191	0.153606	328	0.106367
BAIAP3_ENST00000426824.3	-0.0320116	0.268844	328	0.120251
BAIAP3_ENST00000561602.1	-0.112657	0.89652	328	0.311953
BAIAP3_ENST00000561793.1	-0.00689771	0.124874	328	0.102763
BAIAP3_ENST00000562208.1	-0.064087	0.555711	328	0.163741
BAIAP3_ENST00000564213.1	-0.0884961	0.753963	328	0.218949
BAIAP3_ENST00000565665.1	-0.124239	0.937536	328	0.366051
BAIAP3_ENST00000566162.1	0.000769545	0.102585	328	0.100225
BAIAP3_ENST00000566389.1	-0.0790966	0.670593	328	0.190005
BAIAP3_ENST00000567203.1	-0.0549177	0.463458	328	0.146793
BAIAP3_ENST00000567825.1	-0.0722231	0.63798	328	0.181351
BAIAP3_ENST00000568198.1	-0.0800311	0.681621	328	0.193212
BAIAP3_ENST00000568887.1	-0.106785	0.872145	328	0.289912
TSR3_ENST00000007390.2	-0.0567005	0.463945	328	0.146904
TSR3_ENST00000566296.1	0.0711293	0.612634	328	0.175258
PIGQ_ENST00000026218.5	-0.00752267	0.12709	328	0.103037
PIGQ_ENST00000293874.2	-0.0935423	0.810266	328	0.246584
PIGQ_ENST00000321878.5	0.0245222	0.205683	328	0.112699
PIGQ_ENST00000409439.2	0.0431042	0.345207	328	0.128937
PIGQ_ENST00000409527.2	-0.0427819	0.354193	328	0.130205
PIGQ_ENST00000420990.2	-0.111163	0.867479	328	0.285731
PIGQ_ENST00000422307.1	0.125983	0.919139	328	0.336837
PIGQ_ENST00000439574.1	-0.0427376	0.343208	328	0.128704
PIGQ_ENST00000443147.1	0.0420873	0.336362	328	0.128074
PIGQ_ENST00000470411.2	0.111008	0.87498	328	0.292686
PIGQ_ENST00000476438.1	-0.0363324	0.282408	328	0.121768
PIGQ_ENST00000480424.2	-0.000581516	0.101763	328	0.100177
PIGQ_ENST00000537901.1	0.0141322	0.155441	328	0.106618
PIGQ_ENST00000540241.1	0.0557175	0.479048	328	0.149269
PIGQ_ENST00000540548.1	0.0332146	0.278996	328	0.121419
PIGQ_ENST00000544860.1	0.000790087	0.102522	328	0.100221
CRAMP1L_ENST00000262317.4	0.0114217	0.14152	328	0.1048
CRAMP1L_ENST00000293925.5	0.0574451	0.474714	328	0.148554
CRAMP1L_ENST00000397412.3	-0.0146842	0.158235	328	0.106952
CRAMP1L_ENST00000415022.1	0.0365304	0.295146	328	0.123206
CRAMP1L_ENST00000436138.3	0.0201948	0.190943	328	0.110811
CRAMP1L_ENST00000466562.1	0.0221697	0.201506	328	0.112172
CRAMP1L_ENST00000467286.1	0.00872437	0.132709	328	0.103771
CRAMP1L_ENST00000468839.1	0.0163311	0.16809	328	0.108104
CRAMP1L_ENST00000492778.1	0.0375667	0.308376	328	0.124697
CRAMP1L_ENST00000498594.1	0.0130987	0.153557	328	0.10636
TEAD3_ENST00000338863.7	-0.0235088	0.189629	328	0.11071
TEAD3_ENST00000402886.3	-0.0460384	0.369988	328	0.132695
TEAD3_ENST00000433586.1	0.152204	0.983074	328	0.516788
SELE_ENST00000333360.7	0.0921797	0.805041	328	0.243689
SELE_ENST00000367774.1	-0.0534579	0.458446	328	0.146028
SELE_ENST00000367775.1	-0.061802	0.52094	328	0.157384
SELE_ENST00000367776.1	-0.0718486	0.628279	328	0.178901
SELE_ENST00000367777.1	-0.0455999	0.390827	328	0.135836
SELE_ENST00000367779.4	0.0152369	0.164437	328	0.107623
SELE_ENST00000367780.4	-0.0732471	0.623542	328	0.177672
SELE_ENST00000367782.4	0.0920476	0.796448	328	0.238862
SELE_ENST00000461085.1	0.0408984	0.343448	328	0.12872
SELE_ENST00000609271.1	0.158498	0.987401	328	0.552972
DNAJC11_ENST00000294401.7	0.0671214	0.580048	328	0.168185
DNAJC11_ENST00000349363.6	-0.0589868	0.517118	328	0.156717
DNAJC11_ENST00000377573.5	-0.0554312	0.474385	328	0.148453
DNAJC11_ENST00000377577.5	0.141456	0.969633	328	0.449038
DNAJC11_ENST00000426784.1	-0.0554828	0.477923	328	0.14905
DNAJC11_ENST00000451196.1	-0.0589868	0.517118	328	0.156717
DNAJC11_ENST00000460594.1	-0.0205624	0.191899	328	0.110904
DNAJC11_ENST00000465508.1	0.0343915	0.283225	328	0.121898
DNAJC11_ENST00000465911.1	0.144204	0.968481	328	0.444144
DNAJC11_ENST00000472414.1	0.000370165	0.10121	328	0.100099
DNAJC11_ENST00000473993.1	0.0636741	0.555034	328	0.163641
DNAJC11_ENST00000485073.1	0.0262489	0.225222	328	0.11495
DNAJC11_ENST00000542246.1	-0.0210307	0.195285	328	0.111318
FMO3_ENST00000367755.4	0.0270829	0.230308	328	0.11555
FMO3_ENST00000392085.2	0.0226724	0.20392	328	0.112506
FMO3_ENST00000472784.1	0.0755863	0.651299	328	0.184696
FMO3_ENST00000478457.1	-0.032754	0.276813	328	0.121159
FMO3_ENST00000479749.1	0.00792978	0.129553	328	0.103372
FMO3_ENST00000530212.1	0.00691394	0.125715	328	0.102894
FMO3_ENST00000534514.1	-0.0321176	0.272777	328	0.12072
FMO3_ENST00000538429.1	-0.0134313	0.154571	328	0.106483
FMO3_ENST00000542847.1	-0.0440763	0.375613	328	0.13334
MYLIP_ENST00000349606.4	-0.0953478	0.762534	328	0.223238
MYLIP_ENST00000356840.3	-0.0764192	0.618831	328	0.176731
NOX1_ENST00000217885.5	0.040249	0.301289	328	0.12407
NOX1_ENST00000372960.4	0.096308	0.819993	328	0.251932
NOX1_ENST00000372964.1	0.0198855	0.190588	328	0.110747
NOX1_ENST00000372966.3	0.00543113	0.116556	328	0.10182
[truncated: 182,571 more rows]

## Sheet: Merged_TC_vs_exon_inclusion
Supplementary Table S2c: Merged TC vs. exon inclusion proportions
Correlations of merged log2 z-scored CCLE WGS + GDSC WES TC and inclusion levels of all exons
	coef	P_value	Sample_size	Q_value
WASH7P_3p_chr1_29370_29321_ENSG00000227232.4	0.0852841	0.751657	327	0.121823
WASH7P_3p_chr1_18379_18268_ENSG00000227232.4	-0.113385	0.861085	324	0.146495
WASH7P_3p_chr1_18061_17915_ENSG00000227232.4	-0.0481642	0.4025	328	0.101337
WASH7P_3p_chr1_17504_17498_ENSG00000227232.4	0.00118174	0.103896	327	0.10003
WASH7P_3p_chr1_17368_17233_ENSG00000227232.4	-0.0808638	0.685665	324	0.114407
WASH7P_3p_chr1_16765_16607_ENSG00000227232.4	-0.118581	0.580501	114	0.10837
WASH7P_3p_chr1_15947_15796_ENSG00000227232.4	-0.103191	0.776447	251	0.125353
WASH7P_3p_chr1_15038_14970_ENSG00000227232.4	0.0240066	0.213234	325	0.10003
RP11-34P13.7_3p_chr1_129223_129055_ENSG00000238009.2	-0.0794109	0.24571	50	0.10003
RP11-34P13.7_3p_chr1_112804_112700_ENSG00000238009.2	-0.185566	0.34057	33	0.10003
RP11-34P13.7_3p_chr1_92240_92091_ENSG00000238009.2	-0.00629684	0.105734	29	0.10003
AL627309.1_3p_chr1_137681_137621_ENSG00000237683.5	-0.0736877	0.513404	216	0.105362
RP11-34P13.14_3p_chr1_140339_140075_ENSG00000239906.1	-0.0267541	0.218769	294	0.10003
RP11-34P13.14_3p_chr1_139847_139790_ENSG00000239906.1	-0.058629	0.451894	295	0.102631
RP11-34P13.13_3p_chr1_173862_173753_ENSG00000241860.2	-0.0431242	0.34317	309	0.10003
RP11-34P13.13_3p_chr1_172688_172557_ENSG00000241860.2	-0.0764334	0.622751	307	0.110354
RP11-34P13.13_3p_chr1_169264_169049_ENSG00000241860.2	0.00635655	0.121681	309	0.10003
RP11-34P13.13_3p_chr1_168767_168610_ENSG00000241860.2	0.112033	0.86354	312	0.14702
RP11-34P13.13_3p_chr1_168165_168100_ENSG00000241860.2	0.0914827	0.744014	307	0.120755
RP11-34P13.13_3p_chr1_165942_165884_ENSG00000241860.2	0.0833884	0.657938	298	0.112439
RP11-34P13.13_3p_chr1_164791_164263_ENSG00000241860.2	-0.0796084	0.658202	300	0.112439
RP11-34P13.13_3p_chr1_155831_155767_ENSG00000241860.2	-0.0794232	0.646254	297	0.111879
RP11-34P13.13_3p_chr1_149707_146386_ENSG00000241860.2	-0.0175826	0.170934	297	0.10003
AP006222.2_3p_chr1_267253_267096_ENSG00000228463.4	-0.0102613	0.137521	302	0.10003
AP006222.2_3p_chr1_259121_259017_ENSG00000228463.4	-0.00510888	0.117561	307	0.10003
AP006222.2_3p_chr1_238567_238418_ENSG00000228463.4	0.0956999	0.765232	309	0.12338
AP006222.2_3p_chr1_234484_234355_ENSG00000228463.4	0.0730202	0.624551	311	0.110487
RP4-669L17.10_5p_chr1_319968_320653_ENSG00000237094.7	-0.0987823	0.81517	304	0.133335
RP4-669L17.10_5p_chr1_320881_320938_ENSG00000237094.7	0.102974	0.794245	305	0.128596
RP4-669L17.10_5p_chr1_321032_321290_ENSG00000237094.7	-0.0560437	0.446202	305	0.102449
RP4-669L17.10_5p_chr1_322038_322228_ENSG00000237094.7	0.0570937	0.458695	311	0.102807
RP4-669L17.10_5p_chr1_324288_324345_ENSG00000237094.7	-0.0191821	0.179168	305	0.10003
RP4-669L17.10_5p_chr1_324439_326095_ENSG00000237094.7	0.0760461	0.630755	307	0.110868
RP4-669L17.10_5p_chr1_446014_446193_ENSG00000237094.7	0.0474217	0.38726	306	0.100842
RP5-857K21.15_5p_chr1_461154_461288_ENSG00000236743.1	-0.0530569	0.430038	308	0.101967
RP5-857K21.15_5p_chr1_461751_461954_ENSG00000236743.1	-0.0798872	0.67288	308	0.113722
RP5-857K21.1_3p_chr1_522335_522201_ENSG00000231709.1	0.0702534	0.590336	308	0.108525
RP5-857K21.4_3p_chr1_655580_655412_ENSG00000230021.3	-0.0207744	0.190129	305	0.10003
RP5-857K21.4_3p_chr1_543436_543335_ENSG00000230021.3	0.110808	0.876744	316	0.151759
MTATP6P1_5p_chr1_569122_569755_ENSG00000248527.1	-0.103814	0.806193	325	0.131193
RP11-206L10.3_3p_chr1_685396_682075_ENSG00000235373.1	0.0785077	0.578842	243	0.108283
RP11-206L10.5_3p_chr1_700236_700103_ENSG00000240618.1	-0.00335695	0.109428	233	0.10003
RP11-206L10.2_3p_chr1_714006_713664_ENSG00000228327.2	0.0248981	0.216399	326	0.10003
RP11-206L10.2_3p_chr1_709660_709551_ENSG00000228327.2	0.101457	0.817678	305	0.134077
RP11-206L10.2_3p_chr1_708487_708356_ENSG00000228327.2	0.147348	0.974246	307	0.241992
RP11-206L10.2_3p_chr1_705092_704877_ENSG00000228327.2	0.0807377	0.677962	316	0.114052
RP11-206L10.2_3p_chr1_703993_703928_ENSG00000228327.2	0.128517	0.927254	292	0.182098
RP11-206L10.2_3p_chr1_701767_701709_ENSG00000228327.2	0.0785148	0.647329	289	0.111969
RP11-206L10.9_5p_chr1_717317_717571_ENSG00000237491.4	0.0680144	0.351796	137	0.10003
RP11-206L10.9_5p_chr1_719750_720357_ENSG00000237491.4	0.144328	0.782674	127	0.12627
RP11-206L10.9_5p_chr1_728262_728421_ENSG00000237491.4	-0.0496365	0.279958	140	0.10003
RP11-206L10.9_5p_chr1_730850_730962_ENSG00000237491.4	0.11954	0.68418	141	0.114201
RP11-206L10.9_5p_chr1_739299_739602_ENSG00000237491.4	0.159102	0.899758	179	0.163981
RP11-206L10.9_5p_chr1_740156_740650_ENSG00000237491.4	0.129433	0.81847	190	0.134166
RP11-206L10.9_5p_chr1_742597_742845_ENSG00000237491.4	-0.021979	0.174179	223	0.10003
RP11-206L10.9_5p_chr1_745002_745440_ENSG00000237491.4	0.139874	0.92438	240	0.18003
RP11-206L10.8_3p_chr1_745488_745447_ENSG00000230092.3	0.141286	0.912212	228	0.17041
RP11-206L10.8_3p_chr1_744003_743954_ENSG00000230092.3	0.129486	0.852809	217	0.143411
RP11-206L10.8_3p_chr1_741271_741179_ENSG00000230092.3	0.0355913	0.214524	165	0.10003
FAM87B_5p_chr1_754103_755214_ENSG00000177757.1	0.0498518	0.358553	256	0.100122
RP11-206L10.11_5p_chr1_764383_764484_ENSG00000228794.4	0.0790254	0.681004	328	0.114197
RP11-206L10.11_5p_chr1_776580_777400_ENSG00000228794.4	-0.0831464	0.708943	326	0.116982
RP11-206L10.11_5p_chr1_783034_783186_ENSG00000228794.4	0.0548872	0.449458	327	0.102599
RP11-206L10.11_5p_chr1_784864_784982_ENSG00000228794.4	0.0461391	0.378959	325	0.100491
RP11-206L10.11_5p_chr1_785558_785731_ENSG00000228794.4	-0.0190968	0.184117	325	0.10003
RP11-206L10.11_5p_chr1_787307_787490_ENSG00000228794.4	0.102114	0.844716	325	0.141107
RP11-206L10.11_5p_chr1_788051_788146_ENSG00000228794.4	0.130544	0.946919	321	0.199978
RP11-206L10.11_5p_chr1_788771_794826_ENSG00000228794.4	0.122221	0.913952	306	0.171456
FAM41C_3p_chr1_812283_812126_ENSG00000230368.2	0.153169	0.469215	54	0.103374
FAM41C_3p_chr1_805581_805466_ENSG00000230368.2	0.214807	0.677856	52	0.114052
TUBB8P11_5p_chr1_808672_809491_ENSG00000234711.1	-0.0368906	0.155274	53	0.10003
RP11-54O7.16_5p_chr1_851130_851356_ENSG00000272438.1	0.0773921	0.446991	193	0.102449
RP11-54O7.1_5p_chr1_847325_849550_ENSG00000230699.2	0.140183	0.503767	80	0.104843
RP11-54O7.3_3p_chr1_855072_854715_ENSG00000223764.2	0.164456	0.714949	99	0.117578
RP11-54O7.3_3p_chr1_854295_854205_ENSG00000223764.2	0.0592467	0.275092	104	0.10003
RP11-54O7.3_3p_chr1_853490_853402_ENSG00000223764.2	0.141977	0.482864	64	0.103858
SAMD11_5p_chr1_865535_865555_ENSG00000187634.6	0.147507	0.831246	201	0.136757
SAMD11_5p_chr1_866419_866425_ENSG00000187634.6	0.141158	0.846185	213	0.141786
SAMD11_5p_chr1_871152_871276_ENSG00000187634.6	0.140055	0.826424	209	0.135717
SAMD11_5p_chr1_874420_874509_ENSG00000187634.6	0.144106	0.845471	212	0.14134
SAMD11_5p_chr1_874655_874840_ENSG00000187634.6	0.1448	0.832675	196	0.137162
SAMD11_5p_chr1_876524_876686_ENSG00000187634.6	0.217513	0.98583	200	0.286612
SAMD11_5p_chr1_877516_877631_ENSG00000187634.6	0.19936	0.969592	202	0.231375
SAMD11_5p_chr1_877790_877868_ENSG00000187634.6	0.17647	0.961162	220	0.216713
SAMD11_5p_chr1_877939_878438_ENSG00000187634.6	0.177921	0.952215	208	0.206019
SAMD11_5p_chr1_878633_878757_ENSG00000187634.6	0.125343	0.815121	229	0.133327
SAMD11_5p_chr1_879078_879583_ENSG00000187634.6	0.138122	0.885002	241	0.155858
NOC2L_3p_chr1_894689_894595_ENSG00000188976.6	0.0739232	0.6488	328	0.112085
NOC2L_3p_chr1_894461_894309_ENSG00000188976.6	0.0783714	0.686423	328	0.11446
NOC2L_3p_chr1_892653_892479_ENSG00000188976.6	0.0769753	0.676389	328	0.113987
NOC2L_3p_chr1_892405_892274_ENSG00000188976.6	0.0715202	0.627766	328	0.110683
NOC2L_3p_chr1_891595_891475_ENSG00000188976.6	0.0732294	0.64121	328	0.111611
NOC2L_3p_chr1_891393_891303_ENSG00000188976.6	0.0719076	0.628317	328	0.1107
NOC2L_3p_chr1_889462_889384_ENSG00000188976.6	0.0828296	0.723411	328	0.118692
NOC2L_3p_chr1_889272_889162_ENSG00000188976.6	0.0849478	0.739976	328	0.120506
NOC2L_3p_chr1_888668_888555_ENSG00000188976.6	0.0715121	0.630733	328	0.110868
NOC2L_3p_chr1_887980_887792_ENSG00000188976.6	0.0720122	0.630616	328	0.110868
NOC2L_3p_chr1_887519_887380_ENSG00000188976.6	0.0768189	0.674957	328	0.113867
NOC2L_3p_chr1_886618_886507_ENSG00000188976.6	0.0826667	0.721361	328	0.118289
NOC2L_3p_chr1_883983_883870_ENSG00000188976.6	0.0649426	0.565444	328	0.107284
NOC2L_3p_chr1_883612_883511_ENSG00000188976.6	0.0710889	0.612678	328	0.1098
NOC2L_3p_chr1_881925_881782_ENSG00000188976.6	0.0847445	0.741363	328	0.120579
NOC2L_3p_chr1_881666_881553_ENSG00000188976.6	0.0768133	0.676549	328	0.113987
NOC2L_3p_chr1_881033_880898_ENSG00000188976.6	0.071889	0.630602	328	0.110868
NOC2L_3p_chr1_880526_880437_ENSG00000188976.6	0.0779584	0.68379	328	0.114201
KLHL17_5p_chr1_896673_896932_ENSG00000187961.9	0.313476	0.977671	76	0.252452
KLHL17_5p_chr1_897009_897130_ENSG00000187961.9	0.132817	0.947536	308	0.200808
KLHL17_5p_chr1_897206_897427_ENSG00000187961.9	0.108012	0.871992	327	0.150085
KLHL17_5p_chr1_897735_897851_ENSG00000187961.9	0.116229	0.902692	322	0.165649
KLHL17_5p_chr1_898084_898297_ENSG00000187961.9	0.113584	0.895402	325	0.161334
KLHL17_5p_chr1_898412_898633_ENSG00000187961.9	0.112529	0.895495	325	0.161334
KLHL17_5p_chr1_898717_898884_ENSG00000187961.9	0.115654	0.905952	327	0.16735
KLHL17_5p_chr1_899300_899388_ENSG00000187961.9	0.121084	0.922564	327	0.178261
KLHL17_5p_chr1_899487_899560_ENSG00000187961.9	0.112311	0.888112	327	0.157463
KLHL17_5p_chr1_899729_899910_ENSG00000187961.9	0.112001	0.886236	327	0.156357
KLHL17_5p_chr1_900343_901095_ENSG00000187961.9	0.107648	0.868682	326	0.149339
PLEKHN1_5p_chr1_902084_902183_ENSG00000187583.6	-0.0149779	0.150232	243	0.10003
PLEKHN1_5p_chr1_905657_905803_ENSG00000187583.6	0.0300971	0.225434	246	0.10003
PLEKHN1_5p_chr1_905901_905981_ENSG00000187583.6	0.0468604	0.333835	244	0.10003
PLEKHN1_5p_chr1_906066_906386_ENSG00000187583.6	0.0454846	0.315175	232	0.10003
PLEKHN1_5p_chr1_906457_906588_ENSG00000187583.6	0.0858659	0.584358	215	0.108435
PLEKHN1_5p_chr1_906704_906784_ENSG00000187583.6	0.0379426	0.267927	232	0.10003
PLEKHN1_5p_chr1_907455_907530_ENSG00000187583.6	0.0414132	0.291942	233	0.10003
PLEKHN1_5p_chr1_907668_907804_ENSG00000187583.6	0.0271493	0.209714	246	0.10003
PLEKHN1_5p_chr1_908241_908390_ENSG00000187583.6	0.0452958	0.326	248	0.10003
PLEKHN1_5p_chr1_908566_908706_ENSG00000187583.6	0.0458975	0.334281	256	0.10003
PLEKHN1_5p_chr1_908880_909020_ENSG00000187583.6	-0.0315849	0.237531	250	0.10003
PLEKHN1_5p_chr1_909213_909431_ENSG00000187583.6	0.0326535	0.24305	251	0.10003
PLEKHN1_5p_chr1_909696_909744_ENSG00000187583.6	0.051941	0.365556	238	0.100281
PLEKHN1_5p_chr1_909822_910488_ENSG00000187583.6	0.066656	0.461585	226	0.103032
C1orf170_3p_chr1_917497_917445_ENSG00000187642.5	-0.209645	0.647041	46	0.111946
C1orf170_3p_chr1_916037_914261_ENSG00000187642.5	0.0862429	0.228266	48	0.10003
C1orf170_3p_chr1_912004_911879_ENSG00000187642.5	-0.0966288	0.331687	82	0.10003
HES4_3p_chr1_935552_935072_ENSG00000188290.6	-0.0454946	0.353389	286	0.10003
HES4_3p_chr1_934993_934906_ENSG00000188290.6	-0.00676118	0.122916	290	0.10003
RP11-54O7.11_3p_chr1_948573_948297_ENSG00000224969.1	-0.0746112	0.347048	110	0.10003
ISG15_5p_chr1_948803_948956_ENSG00000187608.5	0.00176441	0.103231	109	0.10003
ISG15_5p_chr1_949364_949920_ENSG00000187608.5	-0.00380502	0.113345	324	0.10003
AGRN_5p_chr1_957581_957842_ENSG00000188157.9	0.0365163	0.301311	311	0.10003
AGRN_5p_chr1_970657_970704_ENSG00000188157.9	0.0378173	0.313286	316	0.10003
AGRN_5p_chr1_976045_976260_ENSG00000188157.9	-0.000117678	0.100372	317	0.100002
AGRN_5p_chr1_976553_976777_ENSG00000188157.9	-0.0425117	0.33393	308	0.10003
AGRN_5p_chr1_976858_977082_ENSG00000188157.9	-0.010386	0.137967	311	0.10003
AGRN_5p_chr1_977336_977542_ENSG00000188157.9	-0.0189623	0.180867	318	0.10003
AGRN_5p_chr1_978619_978837_ENSG00000188157.9	0.0119757	0.147228	316	0.10003
AGRN_5p_chr1_978918_979112_ENSG00000188157.9	0.0567281	0.486074	319	0.104057
AGRN_5p_chr1_979203_979403_ENSG00000188157.9	0.0750958	0.657415	316	0.112439
AGRN_5p_chr1_979489_979637_ENSG00000188157.9	0.0483209	0.408038	318	0.101385
AGRN_5p_chr1_979714_979819_ENSG00000188157.9	0.044292	0.373058	323	0.100341
AGRN_5p_chr1_980541_980657_ENSG00000188157.9	0.0422563	0.353528	318	0.10003
AGRN_5p_chr1_980739_980903_ENSG00000188157.9	0.0400563	0.333663	319	0.10003
AGRN_5p_chr1_981113_981256_ENSG00000188157.9	0.0384141	0.320652	319	0.10003
AGRN_5p_chr1_981344_981468_ENSG00000188157.9	0.0163652	0.167781	320	0.10003
AGRN_5p_chr1_981540_981645_ENSG00000188157.9	0.0337358	0.279383	318	0.10003
AGRN_5p_chr1_981777_982115_ENSG00000188157.9	0.0265149	0.230402	318	0.10003
AGRN_5p_chr1_982200_982337_ENSG00000188157.9	0.024561	0.217179	315	0.10003
AGRN_5p_chr1_982707_982834_ENSG00000188157.9	0.0228656	0.20654	316	0.10003
AGRN_5p_chr1_982953_983067_ENSG00000188157.9	0.0315749	0.265792	317	0.10003
AGRN_5p_chr1_983156_983275_ENSG00000188157.9	0.0574052	0.493254	319	0.104287
AGRN_5p_chr1_983392_983745_ENSG00000188157.9	0.0250078	0.220783	321	0.10003
AGRN_5p_chr1_984247_984439_ENSG00000188157.9	0.0323142	0.271516	315	0.10003
AGRN_5p_chr1_984616_984831_ENSG00000188157.9	0.041219	0.345345	320	0.10003
AGRN_5p_chr1_984946_985175_ENSG00000188157.9	0.0565695	0.484767	319	0.103948
AGRN_5p_chr1_985283_985417_ENSG00000188157.9	0.0274087	0.236546	318	0.10003
AGRN_5p_chr1_985613_985709_ENSG00000188157.9	0.0208318	0.194421	317	0.10003
AGRN_5p_chr1_985807_985971_ENSG00000188157.9	0.028104	0.241765	317	0.10003
AGRN_5p_chr1_986106_986217_ENSG00000188157.9	0.057548	0.478039	317	0.103704
AGRN_5p_chr1_986412_986423_ENSG00000188157.9	0.0474414	0.379144	318	0.100491
AGRN_5p_chr1_986633_986749_ENSG00000188157.9	0.0411401	0.344399	319	0.10003
AGRN_5p_chr1_986833_987025_ENSG00000188157.9	0.0497095	0.417659	318	0.101772
AGRN_5p_chr1_987108_987195_ENSG00000188157.9	0.0437066	0.362853	322	0.100222
AGRN_5p_chr1_987373_987396_ENSG00000188157.9	-0.0176942	0.170455	321	0.10003
AGRN_5p_chr1_988841_988873_ENSG00000188157.9	0.00443044	0.115192	321	0.10003
AGRN_5p_chr1_989133_989357_ENSG00000188157.9	0.0136334	0.15571	321	0.10003
AGRN_5p_chr1_989828_989931_ENSG00000188157.9	0.00792226	0.129276	317	0.10003
AGRN_5p_chr1_990204_990412_ENSG00000188157.9	0.0459832	0.38086	318	0.100587
AGRN_5p_chr1_990596_991277_ENSG00000188157.9	-0.00689118	0.119207	209	0.10003
RP11-465B22.3_5p_chr1_995660_995773_ENSG00000217801.5	0.00490209	0.113662	203	0.10003
RP11-465B22.3_5p_chr1_996400_996497_ENSG00000217801.5	-0.127965	0.882078	260	0.154575
RP11-465B22.3_5p_chr1_1000732_1000855_ENSG00000217801.5	-0.0487138	0.365361	265	0.100281
RP11-465B22.3_5p_chr1_1001210_1001836_ENSG00000217801.5	-0.0102514	0.134635	264	0.10003
RP11-465B22.3_5p_chr1_1003249_1003383_ENSG00000217801.5	0.144655	0.688573	94	0.114765
RP11-465B22.3_5p_chr1_1003957_1004104_ENSG00000217801.5	0.0150625	0.120969	53	0.10003
RP11-54O7.18_3p_chr1_998458_998441_ENSG00000273443.1	-0.156507	0.890453	246	0.158688
RNF223_3p_chr1_1009687_1009396_ENSG00000237330.2	-0.187775	0.861771	135	0.146551
C1orf159_3p_chr1_1051741_1051440_ENSG00000131591.13	0.0711683	0.617732	323	0.110042
C1orf159_3p_chr1_1050455_1050402_ENSG00000131591.13	0.00807149	0.129491	323	0.10003
C1orf159_3p_chr1_1042251_1042030_ENSG00000131591.13	0.0094329	0.134834	323	0.10003
C1orf159_3p_chr1_1041507_1041336_ENSG00000131591.13	-0.0478149	0.397242	325	0.101149
C1orf159_3p_chr1_1028193_1027946_ENSG00000131591.13	-0.0477169	0.384425	325	0.100708
C1orf159_3p_chr1_1027554_1026852_ENSG00000131591.13	0.057341	0.491809	328	0.104287
C1orf159_3p_chr1_1026754_1025733_ENSG00000131591.13	0.0656699	0.568455	325	0.10745
C1orf159_3p_chr1_1022977_1022882_ENSG00000131591.13	0.0718009	0.627615	327	0.110683
C1orf159_3p_chr1_1022584_1022519_ENSG00000131591.13	0.076946	0.673835	328	0.113827
C1orf159_3p_chr1_1021392_1021258_ENSG00000131591.13	0.0764332	0.669432	327	0.113311
C1orf159_3p_chr1_1020690_1020631_ENSG00000131591.13	-0.0627662	0.534156	327	0.105987
C1orf159_3p_chr1_1019763_1019295_ENSG00000131591.13	-0.00838633	0.130099	328	0.10003
TTLL10_5p_chr1_1114569_1114713_ENSG00000162571.9	0.099429	0.287298	50	0.10003
TTLL10_5p_chr1_1115037_1115233_ENSG00000162571.9	-0.144551	0.428129	57	0.101967
TTLL10_5p_chr1_1115414_1115720_ENSG00000162571.9	-0.104042	0.303756	60	0.10003
TTLL10_5p_chr1_1115863_1115981_ENSG00000162571.9	-0.0124645	0.114287	55	0.10003
TTLL10_5p_chr1_1116111_1116240_ENSG00000162571.9	0.210798	0.684809	63	0.114337
TTLL10_5p_chr1_1117121_1117195_ENSG00000162571.9	0.146203	0.436015	59	0.102084
TTLL10_5p_chr1_1117741_1117826_ENSG00000162571.9	-0.121145	0.375069	66	0.100398
TTLL10_5p_chr1_1118256_1118427_ENSG00000162571.9	-0.0625216	0.215771	74	0.10003
TTLL10_5p_chr1_1119300_1119471_ENSG00000162571.9	0.0502217	0.182353	72	0.10003
TTLL10_5p_chr1_1120349_1121244_ENSG00000162571.9	0.0748638	0.241785	67	0.10003
TTLL10_5p_chr1_1131980_1132096_ENSG00000162571.9	0.0504236	0.17284	51	0.10003
TTLL10_5p_chr1_1132473_1132566_ENSG00000162571.9	0.200789	0.51167	50	0.10529
TTLL10_5p_chr1_1132818_1133315_ENSG00000162571.9	0.110655	0.324691	51	0.10003
TNFRSF18_3p_chr1_1142071_1141765_ENSG00000186891.9	-0.136493	0.62634	124	0.110657
TNFRSF18_3p_chr1_1141060_1140750_ENSG00000186891.9	-0.134726	0.624195	125	0.110432
TNFRSF18_3p_chr1_1139866_1139779_ENSG00000186891.9	-0.160719	0.736068	122	0.119762
TNFRSF18_3p_chr1_1139616_1139414_ENSG00000186891.9	-0.0978695	0.442026	123	0.102315
TNFRSF4_3p_chr1_1149512_1149363_ENSG00000186827.6	0.177701	0.513421	55	0.105362
TNFRSF4_3p_chr1_1149165_1149043_ENSG00000186827.6	0.0860313	0.249888	55	0.10003
TNFRSF4_3p_chr1_1148878_1148775_ENSG00000186827.6	0.0701321	0.245588	55	0.10003
TNFRSF4_3p_chr1_1148473_1148372_ENSG00000186827.6	0.12273	0.348208	59	0.10003
TNFRSF4_3p_chr1_1148084_1148018_ENSG00000186827.6	0.027767	0.134423	59	0.10003
TNFRSF4_3p_chr1_1147518_1147322_ENSG00000186827.6	0.145371	0.377425	58	0.100462
TNFRSF4_3p_chr1_1147212_1147084_ENSG00000186827.6	0.0626432	0.183583	55	0.10003
SDF4_3p_chr1_1167411_1167272_ENSG00000078808.12	0.0400933	0.33736	328	0.10003
SDF4_3p_chr1_1164326_1163848_ENSG00000078808.12	0.0110234	0.143257	328	0.10003
SDF4_3p_chr1_1159348_1159212_ENSG00000078808.12	0.0147575	0.16186	328	0.10003
SDF4_3p_chr1_1158737_1158624_ENSG00000078808.12	0.0258589	0.228486	328	0.10003
SDF4_3p_chr1_1154385_1154149_ENSG00000078808.12	0.0518246	0.444237	328	0.102346
SDF4_3p_chr1_1154013_1153838_ENSG00000078808.12	0.0445087	0.374184	328	0.100364
FAM132A_3p_chr1_1182102_1181894_ENSG00000184163.3	-0.197061	0.726753	75	0.118932
FAM132A_3p_chr1_1179877_1179761_ENSG00000184163.3	0.142567	0.885452	189	0.155939
FAM132A_3p_chr1_1179655_1179571_ENSG00000184163.3	0.184001	0.81481	99	0.133327
FAM132A_3p_chr1_1179485_1179334_ENSG00000184163.3	0.215496	0.913096	104	0.170728
FAM132A_3p_chr1_1178932_1178824_ENSG00000184163.3	0.17015	0.635846	74	0.111211
FAM132A_3p_chr1_1178532_1178442_ENSG00000184163.3	0.0989876	0.366121	77	0.100281
FAM132A_3p_chr1_1178293_1178215_ENSG00000184163.3	0.145248	0.648316	100	0.112073
UBE2J2_3p_chr1_1209265_1208233_ENSG00000160087.16	0.0291042	0.235331	328	0.10003
UBE2J2_3p_chr1_1207017_1206890_ENSG00000160087.16	0.0343828	0.293124	328	0.10003
UBE2J2_3p_chr1_1203372_1203113_ENSG00000160087.16	0.0568296	0.483687	328	0.103883
UBE2J2_3p_chr1_1201670_1201478_ENSG00000160087.16	0.0590149	0.509956	328	0.105138
UBE2J2_3p_chr1_1200210_1200163_ENSG00000160087.16	-0.0053571	0.119308	328	0.10003
UBE2J2_3p_chr1_1198766_1198726_ENSG00000160087.16	0.0714154	0.625257	328	0.110569
UBE2J2_3p_chr1_1192690_1192588_ENSG00000160087.16	0.0428848	0.35805	328	0.100118
UBE2J2_3p_chr1_1192510_1192372_ENSG00000160087.16	0.0590373	0.509092	328	0.105106
UBE2J2_3p_chr1_1191715_1191425_ENSG00000160087.16	0.0501297	0.427939	328	0.101967
RP5-902P8.10_5p_chr1_1214448_1214773_ENSG00000230415.1	0.0643789	0.375343	185	0.100423
RP5-902P8.10_5p_chr1_1215691_1215800_ENSG00000230415.1	0.0946669	0.24252	37	0.10003
SCNN1D_5p_chr1_1219358_1219470_ENSG00000162572.15	0.0739736	0.455772	193	0.102697
SCNN1D_5p_chr1_1220951_1221044_ENSG00000162572.15	-0.0359758	0.207746	160	0.10003
SCNN1D_5p_chr1_1221306_1221658_ENSG00000162572.15	0.115344	0.673416	166	0.113809
SCNN1D_5p_chr1_1222148_1222355_ENSG00000162572.15	0.0955794	0.548685	169	0.10672
SCNN1D_5p_chr1_1222489_1222679_ENSG00000162572.15	0.0851641	0.537555	199	0.106231
SCNN1D_5p_chr1_1222888_1223216_ENSG00000162572.15	0.0538159	0.345502	236	0.10003
SCNN1D_5p_chr1_1223319_1223417_ENSG00000162572.15	0.095734	0.662603	228	0.112589
SCNN1D_5p_chr1_1225651_1225768_ENSG00000162572.15	0.0947376	0.624411	213	0.110471
SCNN1D_5p_chr1_1225857_1225935_ENSG00000162572.15	0.0770132	0.524503	232	0.105683
SCNN1D_5p_chr1_1226017_1226074_ENSG00000162572.15	0.0638573	0.421472	226	0.101809
SCNN1D_5p_chr1_1226275_1226333_ENSG00000162572.15	0.0423236	0.280383	236	0.10003
SCNN1D_5p_chr1_1226445_1226520_ENSG00000162572.15	0.0582115	0.391222	240	0.100953
SCNN1D_5p_chr1_1226634_1227409_ENSG00000162572.15	0.057134	0.362411	220	0.100213
ACAP3_3p_chr1_1243398_1243149_ENSG00000131584.14	0.0150917	0.160898	324	0.10003
ACAP3_3p_chr1_1242763_1242717_ENSG00000131584.14	-0.0114109	0.143193	325	0.10003
ACAP3_3p_chr1_1239523_1239466_ENSG00000131584.14	-0.0137827	0.156323	328	0.10003
ACAP3_3p_chr1_1238661_1238542_ENSG00000131584.14	-7.19446e-05	0.100235	328	0.100002
ACAP3_3p_chr1_1238355_1238302_ENSG00000131584.14	0.016824	0.17177	328	0.10003
ACAP3_3p_chr1_1237426_1237368_ENSG00000131584.14	0.0190239	0.184298	328	0.10003
ACAP3_3p_chr1_1236072_1235889_ENSG00000131584.14	-0.0218576	0.200831	327	0.10003
ACAP3_3p_chr1_1235582_1235538_ENSG00000131584.14	-0.0262142	0.229845	328	0.10003
ACAP3_3p_chr1_1235448_1235353_ENSG00000131584.14	0.0141282	0.157844	327	0.10003
ACAP3_3p_chr1_1235285_1235211_ENSG00000131584.14	0.0414301	0.345474	328	0.10003
ACAP3_3p_chr1_1234736_1234725_ENSG00000131584.14	0.0382589	0.31852	328	0.10003
ACAP3_3p_chr1_1234059_1233947_ENSG00000131584.14	0.01549	0.164786	328	0.10003
ACAP3_3p_chr1_1233801_1233750_ENSG00000131584.14	0.00143503	0.10481	328	0.10003
ACAP3_3p_chr1_1233645_1233565_ENSG00000131584.14	-0.0456747	0.37616	328	0.100426
ACAP3_3p_chr1_1233493_1233393_ENSG00000131584.14	0.0123858	0.149496	328	0.10003
ACAP3_3p_chr1_1233313_1233202_ENSG00000131584.14	0.00867097	0.13275	328	0.10003
ACAP3_3p_chr1_1232013_1231805_ENSG00000131584.14	0.0240592	0.214047	327	0.10003
ACAP3_3p_chr1_1231660_1231591_ENSG00000131584.14	0.0211718	0.196421	328	0.10003
ACAP3_3p_chr1_1231489_1231395_ENSG00000131584.14	0.00523124	0.118683	328	0.10003
ACAP3_3p_chr1_1231318_1231116_ENSG00000131584.14	0.0232325	0.209217	328	0.10003
ACAP3_3p_chr1_1230934_1230827_ENSG00000131584.14	0.0164221	0.169593	328	0.10003
ACAP3_3p_chr1_1230196_1230098_ENSG00000131584.14	0.00261389	0.108673	327	0.10003
ACAP3_3p_chr1_1230008_1229782_ENSG00000131584.14	0.00649419	0.123586	327	0.10003
ACAP3_3p_chr1_1229579_1229470_ENSG00000131584.14	0.0312409	0.263869	328	0.10003
ACAP3_3p_chr1_1229313_1229203_ENSG00000131584.14	0.0295816	0.251194	328	0.10003
PUSL1_5p_chr1_1244466_1244653_ENSG00000169972.7	0.0274486	0.237435	327	0.10003
PUSL1_5p_chr1_1244834_1244983_ENSG00000169972.7	0.0300907	0.255969	328	0.10003
PUSL1_5p_chr1_1245061_1245231_ENSG00000169972.7	0.030925	0.263746	327	0.10003
PUSL1_5p_chr1_1246014_1246068_ENSG00000169972.7	0.0646329	0.561835	328	0.107157
PUSL1_5p_chr1_1246289_1246451_ENSG00000169972.7	0.0446764	0.372969	327	0.100341
PUSL1_5p_chr1_1246710_1246976_ENSG00000169972.7	0.0525186	0.448881	328	0.102574
CPSF3L_3p_chr1_1260071_1259961_ENSG00000127054.14	0.0282253	0.24288	328	0.10003
CPSF3L_3p_chr1_1257364_1257288_ENSG00000127054.14	-0.0886263	0.747558	328	0.121343
CPSF3L_3p_chr1_1256476_1256376_ENSG00000127054.14	0.0224896	0.205956	328	0.10003
CPSF3L_3p_chr1_1256062_1255836_ENSG00000127054.14	0.0142205	0.159015	328	0.10003
CPSF3L_3p_chr1_1250998_1250900_ENSG00000127054.14	0.0766323	0.677395	328	0.114037
CPSF3L_3p_chr1_1250818_1250784_ENSG00000127054.14	0.0611964	0.533522	328	0.105987
CPSF3L_3p_chr1_1250342_1250204_ENSG00000127054.14	0.0559527	0.48176	328	0.103831
CPSF3L_3p_chr1_1249745_1249681_ENSG00000127054.14	0.0540935	0.467558	328	0.103371
CPSF3L_3p_chr1_1249485_1249112_ENSG00000127054.14	0.0511249	0.43563	328	0.102084
CPSF3L_3p_chr1_1248972_1248889_ENSG00000127054.14	0.0365963	0.305753	328	0.10003
CPSF3L_3p_chr1_1248504_1248415_ENSG00000127054.14	0.0128682	0.151732	328	0.10003
CPSF3L_3p_chr1_1248329_1248167_ENSG00000127054.14	0.0676671	0.58941	328	0.108525
CPSF3L_3p_chr1_1248080_1247973_ENSG00000127054.14	0.0770033	0.671951	328	0.113596
CPSF3L_3p_chr1_1247881_1247820_ENSG00000127054.14	0.0477287	0.401714	328	0.10133
CPSF3L_3p_chr1_1247748_1247606_ENSG00000127054.14	0.0603105	0.520134	328	0.105528
CPSF3L_3p_chr1_1247527_1247398_ENSG00000127054.14	0.0509422	0.432059	328	0.102001
GLTPD1_5p_chr1_1262216_1262412_ENSG00000224051.2	0.0213646	0.196923	327	0.10003
GLTPD1_5p_chr1_1262621_1264277_ENSG00000224051.2	0.0283413	0.24452	328	0.10003
TAS1R3_5p_chr1_1267018_1267318_ENSG00000169962.4	-0.0668122	0.20339	63	0.10003
TAS1R3_5p_chr1_1267404_1268186_ENSG00000169962.4	-0.0248815	0.131898	68	0.10003
TAS1R3_5p_chr1_1268301_1268504_ENSG00000169962.4	-0.078399	0.247683	75	0.10003
TAS1R3_5p_chr1_1268639_1268759_ENSG00000169962.4	-0.131948	0.368332	66	0.100281
TAS1R3_5p_chr1_1268886_1270655_ENSG00000169962.4	-0.0614125	0.195259	67	0.10003
DVL1_3p_chr1_1284730_1284276_ENSG00000107404.13	0.0846074	0.731901	328	0.119373
DVL1_3p_chr1_1278138_1278069_ENSG00000107404.13	0.049539	0.421052	328	0.101809
DVL1_3p_chr1_1277864_1277743_ENSG00000107404.13	0.0389601	0.326721	328	0.10003
DVL1_3p_chr1_1277536_1277433_ENSG00000107404.13	0.0499811	0.422843	328	0.101871
DVL1_3p_chr1_1277185_1277047_ENSG00000107404.13	0.0402848	0.336512	328	0.10003
DVL1_3p_chr1_1275883_1275790_ENSG00000107404.13	0.029961	0.255135	328	0.10003
DVL1_3p_chr1_1275696_1275627_ENSG00000107404.13	0.0307355	0.260766	328	0.10003
DVL1_3p_chr1_1275557_1275418_ENSG00000107404.13	0.025332	0.223545	328	0.10003
DVL1_3p_chr1_1275192_1275116_ENSG00000107404.13	0.0674898	0.592042	328	0.108635
DVL1_3p_chr1_1275029_1274962_ENSG00000107404.13	0.0624987	0.542343	328	0.106405
DVL1_3p_chr1_1274819_1274667_ENSG00000107404.13	-0.120596	0.836728	328	0.138351
DVL1_3p_chr1_1274033_1273902_ENSG00000107404.13	0.053146	0.451388	328	0.102631
DVL1_3p_chr1_1273816_1273649_ENSG00000107404.13	0.0463729	0.389676	328	0.10091
DVL1_3p_chr1_1273563_1273357_ENSG00000107404.13	0.0424562	0.355993	328	0.100071
MXRA8_3p_chr1_1297157_1296622_ENSG00000162576.12	0.277025	0.703027	42	0.116388
MXRA8_3p_chr1_1293923_1293836_ENSG00000162576.12	0.0136322	0.123739	98	0.10003
MXRA8_3p_chr1_1292084_1292061_ENSG00000162576.12	0.0723712	0.371349	158	0.100304
MXRA8_3p_chr1_1291132_1290830_ENSG00000162576.12	-0.0796743	0.359964	119	0.100211
MXRA8_3p_chr1_1290725_1290624_ENSG00000162576.12	0.0350954	0.215897	198	0.10003
MXRA8_3p_chr1_1290532_1290062_ENSG00000162576.12	0.120526	0.605064	133	0.109456
MXRA8_3p_chr1_1289889_1289734_ENSG00000162576.12	0.0992314	0.472013	130	0.103491
MXRA8_3p_chr1_1289612_1289573_ENSG00000162576.12	0.0753053	0.407213	159	0.101339
MXRA8_3p_chr1_1289486_1289410_ENSG00000162576.12	0.138294	0.806396	185	0.131195
MXRA8_3p_chr1_1289326_1289228_ENSG00000162576.12	0.123682	0.683863	165	0.114201
AURKAIP1_3p_chr1_1310875_1309380_ENSG00000175756.9	0.002391	0.108151	328	0.10003
CCNL2_3p_chr1_1334708_1334368_ENSG00000221978.7	-0.0864645	0.724166	328	0.118692
CCNL2_3p_chr1_1334336_1333977_ENSG00000221978.7	0.0147546	0.160823	328	0.10003
CCNL2_3p_chr1_1333746_1333613_ENSG00000221978.7	0.0696207	0.612056	328	0.1098
CCNL2_3p_chr1_1330917_1330774_ENSG00000221978.7	0.0129606	0.152143	328	0.10003
CCNL2_3p_chr1_1328840_1328776_ENSG00000221978.7	-0.000330791	0.101091	328	0.10003
CCNL2_3p_chr1_1327029_1326146_ENSG00000221978.7	-0.00114854	0.103831	328	0.10003
CCNL2_3p_chr1_1325943_1325839_ENSG00000221978.7	0.00136689	0.10456	328	0.10003
CCNL2_3p_chr1_1325751_1325610_ENSG00000221978.7	0.00270517	0.109236	328	0.10003
CCNL2_3p_chr1_1324123_1324006_ENSG00000221978.7	-0.0357399	0.290911	328	0.10003
CCNL2_3p_chr1_1323890_1323872_ENSG00000221978.7	-0.0380632	0.310562	328	0.10003
CCNL2_3p_chr1_1323445_1323334_ENSG00000221978.7	-0.000398458	0.101311	328	0.10003
CCNL2_3p_chr1_1323249_1323157_ENSG00000221978.7	0.00942626	0.135771	328	0.10003
MRPL20_3p_chr1_1342399_1342289_ENSG00000242485.1	-0.0420938	0.346289	328	0.10003
MRPL20_3p_chr1_1341726_1341606_ENSG00000242485.1	-0.0176726	0.174241	328	0.10003
ANKRD65_3p_chr1_1357149_1356177_ENSG00000235098.4	0.0372147	0.165027	85	0.10003
ANKRD65_3p_chr1_1355624_1355432_ENSG00000235098.4	-0.273226	0.978198	97	0.253723
RP4-758J18.7_5p_chr1_1357849_1358071_ENSG00000225905.1	-0.307524	0.826164	37	0.135625
TMEM88B_5p_chr1_1362934_1363167_ENSG00000205116.3	-0.0332085	0.140238	42	0.10003
RP4-758J18.10_3p_chr1_1369953_1369558_ENSG00000225285.1	-0.301381	0.757387	37	0.122779
RP4-758J18.10_3p_chr1_1367223_1367185_ENSG00000225285.1	0.20642	0.573396	46	0.107891
VWA1_5p_chr1_1372187_1372864_ENSG00000179403.10	0.0838932	0.623064	250	0.110354
VWA1_5p_chr1_1374461_1378262_ENSG00000179403.10	-0.021985	0.194756	296	0.10003
ATAD3C_5p_chr1_1387426_1387502_ENSG00000215915.5	-0.161523	0.610814	71	0.10979
ATAD3C_5p_chr1_1387745_1387814_ENSG00000215915.5	-0.0944222	0.32028	64	0.10003
ATAD3C_5p_chr1_1389725_1389880_ENSG00000215915.5	0.0186814	0.145255	142	0.10003
ATAD3C_5p_chr1_1390840_1390899_ENSG00000215915.5	-0.014583	0.129371	120	0.10003
ATAD3C_5p_chr1_1391171_1391296_ENSG00000215915.5	0.00212227	0.103983	133	0.10003
ATAD3C_5p_chr1_1391605_1391729_ENSG00000215915.5	-0.0345319	0.202421	156	0.10003
ATAD3C_5p_chr1_1392509_1392560_ENSG00000215915.5	-0.0572981	0.287144	146	0.10003
ATAD3C_5p_chr1_1394541_1394611_ENSG00000215915.5	-0.128972	0.738927	170	0.120412
ATAD3C_5p_chr1_1396130_1396297_ENSG00000215915.5	-0.098905	0.539802	161	0.106323
ATAD3C_5p_chr1_1397980_1398088_ENSG00000215915.5	-0.158739	0.847321	163	0.142076
ATAD3C_5p_chr1_1403764_1405538_ENSG00000215915.5	-0.103668	0.6463	194	0.111879
ATAD3B_5p_chr1_1412654_1412730_ENSG00000160072.15	0.0189395	0.179191	327	0.10003
ATAD3B_5p_chr1_1414024_1414125_ENSG00000160072.15	0.0430689	0.348017	325	0.10003
ATAD3B_5p_chr1_1414429_1414488_ENSG00000160072.15	0.0481442	0.388568	326	0.100874
ATAD3B_5p_chr1_1416247_1416316_ENSG00000160072.15	0.0615886	0.505546	326	0.104954
ATAD3B_5p_chr1_1417518_1417683_ENSG00000160072.15	0.0686112	0.572729	327	0.107781
ATAD3B_5p_chr1_1417925_1418042_ENSG00000160072.15	0.0837186	0.708293	327	0.116936
ATAD3B_5p_chr1_1420396_1420551_ENSG00000160072.15	0.0822772	0.697697	327	0.115733
ATAD3B_5p_chr1_1421162_1421218_ENSG00000160072.15	0.0838423	0.697983	327	0.115752
ATAD3B_5p_chr1_1421490_1421615_ENSG00000160072.15	0.0931332	0.762985	326	0.123086
ATAD3B_5p_chr1_1421924_1422048_ENSG00000160072.15	0.0659992	0.546163	326	0.106515
ATAD3B_5p_chr1_1423243_1423294_ENSG00000160072.15	0.0484268	0.389214	327	0.100874
ATAD3B_5p_chr1_1424584_1424654_ENSG00000160072.15	0.0661307	0.550585	327	0.106841
ATAD3B_5p_chr1_1425637_1425804_ENSG00000160072.15	0.0743108	0.62466	327	0.110487
ATAD3B_5p_chr1_1425943_1426051_ENSG00000160072.15	0.0765204	0.647777	327	0.112038
ATAD3B_5p_chr1_1430865_1431582_ENSG00000160072.15	0.0596288	0.492064	327	0.104287
ATAD3A_5p_chr1_1451392_1451468_ENSG00000197785.9	0.0791513	0.66229	328	0.112532
ATAD3A_5p_chr1_1453096_1453155_ENSG00000197785.9	0.095118	0.796398	328	0.129188
ATAD3A_5p_chr1_1454301_1454370_ENSG00000197785.9	0.106421	0.859162	327	0.146021
ATAD3A_5p_chr1_1455521_1455686_ENSG00000197785.9	0.0512558	0.421722	327	0.101818
ATAD3A_5p_chr1_1455928_1455997_ENSG00000197785.9	0.0488712	0.406316	328	0.101339
ATAD3A_5p_chr1_1458124_1458279_ENSG00000197785.9	0.0904456	0.755156	328	0.122586
ATAD3A_5p_chr1_1458891_1458947_ENSG00000197785.9	0.0288702	0.24369	328	0.10003
ATAD3A_5p_chr1_1459219_1459344_ENSG00000197785.9	0.015486	0.164563	328	0.10003
ATAD3A_5p_chr1_1459653_1459777_ENSG00000197785.9	0.00584829	0.12101	328	0.10003
ATAD3A_5p_chr1_1460620_1460671_ENSG00000197785.9	0.0236831	0.211181	328	0.10003
ATAD3A_5p_chr1_1461841_1461911_ENSG00000197785.9	0.024403	0.216745	328	0.10003
ATAD3A_5p_chr1_1462541_1462618_ENSG00000197785.9	-0.143701	0.972492	328	0.238598
ATAD3A_5p_chr1_1463075_1463242_ENSG00000197785.9	0.00387916	0.113475	328	0.10003
ATAD3A_5p_chr1_1464603_1464711_ENSG00000197785.9	0.0181744	0.178536	327	0.10003
ATAD3A_5p_chr1_1469306_1470067_ENSG00000197785.9	0.00613875	0.122012	328	0.10003
TMEM240_3p_chr1_1475737_1475670_ENSG00000205090.4	-0.105684	0.221871	44	0.10003
TMEM240_3p_chr1_1475170_1475064_ENSG00000205090.4	-0.194121	0.370657	47	0.100299
TMEM240_3p_chr1_1471177_1470969_ENSG00000205090.4	0.0333076	0.140768	52	0.10003
SSU72_3p_chr1_1510249_1509858_ENSG00000160075.10	0.0106507	0.141669	328	0.10003
SSU72_3p_chr1_1479367_1479249_ENSG00000160075.10	-0.0380659	0.322008	328	0.10003
MIB2_5p_chr1_1552458_1552703_ENSG00000197530.8	-0.0186082	0.180022	324	0.10003
MIB2_5p_chr1_1559154_1559325_ENSG00000197530.8	0.0439305	0.367225	325	0.100281
MIB2_5p_chr1_1560175_1560281_ENSG00000197530.8	0.0529306	0.452867	328	0.102631
MIB2_5p_chr1_1560371_1560565_ENSG00000197530.8	0.0403265	0.325979	327	0.10003
MIB2_5p_chr1_1560666_1560808_ENSG00000197530.8	0.0363284	0.305243	327	0.10003
MIB2_5p_chr1_1560926_1561033_ENSG00000197530.8	-0.0164612	0.169628	328	0.10003
MIB2_5p_chr1_1562217_1562587_ENSG00000197530.8	0.0397057	0.331281	328	0.10003
MIB2_5p_chr1_1562676_1562824_ENSG00000197530.8	0.0127051	0.151488	328	0.10003
MIB2_5p_chr1_1563053_1563209_ENSG00000197530.8	0.0356453	0.301254	328	0.10003
MIB2_5p_chr1_1563399_1563559_ENSG00000197530.8	-0.00602111	0.121924	328	0.10003
MIB2_5p_chr1_1563653_1563779_ENSG00000197530.8	0.00539596	0.119481	328	0.10003
MIB2_5p_chr1_1563869_1564102_ENSG00000197530.8	-0.0176079	0.177077	327	0.10003
MIB2_5p_chr1_1564414_1564691_ENSG00000197530.8	-0.0528763	0.441373	323	0.102315
MIB2_5p_chr1_1564765_1564946_ENSG00000197530.8	-0.0743959	0.544039	247	0.106466
MIB2_5p_chr1_1565019_1565084_ENSG00000197530.8	-0.012143	0.148611	323	0.10003
MIB2_5p_chr1_1565672_1565990_ENSG00000197530.8	-0.0189506	0.184405	322	0.10003
CDK11B_3p_chr1_1590473_1590375_ENSG00000248333.3	-0.0167861	0.170257	328	0.10003
CDK11B_3p_chr1_1588948_1588825_ENSG00000248333.3	0.0047543	0.116378	326	0.10003
CDK11B_3p_chr1_1588714_1588706_ENSG00000248333.3	0.0408543	0.340712	326	0.10003
CDK11B_3p_chr1_1586938_1586823_ENSG00000248333.3	0.0328779	0.266771	319	0.10003
CDK11B_3p_chr1_1581330_1581314_ENSG00000248333.3	-0.0418525	0.300266	264	0.10003
CDK11B_3p_chr1_1580665_1580487_ENSG00000248333.3	-0.0580556	0.446137	291	0.102446
CDK11B_3p_chr1_1577869_1577747_ENSG00000248333.3	-0.0784041	0.594476	269	0.108695
CDK11B_3p_chr1_1577362_1577267_ENSG00000248333.3	-0.0336459	0.250594	268	0.10003
CDK11B_3p_chr1_1577181_1577023_ENSG00000248333.3	0.0636115	0.477575	274	0.103695
CDK11B_3p_chr1_1576474_1576409_ENSG00000248333.3	0.0539433	0.446672	316	0.102449
CDK11B_3p_chr1_1575813_1575638_ENSG00000248333.3	-0.0164293	0.16935	328	0.10003
CDK11B_3p_chr1_1573952_1573862_ENSG00000248333.3	-0.00519513	0.118358	328	0.10003
CDK11B_3p_chr1_1573245_1573124_ENSG00000248333.3	-0.00833143	0.131354	328	0.10003
CDK11B_3p_chr1_1572875_1572770_ENSG00000248333.3	-0.0137128	0.155542	328	0.10003
CDK11B_3p_chr1_1572564_1572443_ENSG00000248333.3	0.0146105	0.160697	328	0.10003
CDK11B_3p_chr1_1572366_1572259_ENSG00000248333.3	0.066253	0.581831	328	0.108392
CDK11B_3p_chr1_1572160_1572044_ENSG00000248333.3	0.0299076	0.255392	328	0.10003
CDK11B_3p_chr1_1571843_1571695_ENSG00000248333.3	0.000235247	0.100777	328	0.10002
CDK11B_3p_chr1_1571488_1571299_ENSG00000248333.3	0.0356986	0.300248	323	0.10003
SLC35E2B_3p_chr1_1624167_1623888_ENSG00000189339.7	0.0110844	0.14282	327	0.10003
SLC35E2B_3p_chr1_1622832_1622415_ENSG00000189339.7	-0.000922345	0.102937	326	0.10003
SLC35E2B_3p_chr1_1608285_1607817_ENSG00000189339.7	0.0192372	0.180341	324	0.10003
SLC35E2B_3p_chr1_1607638_1607503_ENSG00000189339.7	0.0104354	0.138472	323	0.10003
SLC35E2B_3p_chr1_1607029_1606902_ENSG00000189339.7	0.0199774	0.186451	328	0.10003
SLC35E2B_3p_chr1_1603068_1602948_ENSG00000189339.7	0.032422	0.267653	328	0.10003
SLC35E2B_3p_chr1_1601590_1601537_ENSG00000189339.7	0.0261398	0.224084	328	0.10003
SLC35E2B_3p_chr1_1601175_1601103_ENSG00000189339.7	0.0212938	0.194528	328	0.10003
SLC35E2B_3p_chr1_1599911_1599766_ENSG00000189339.7	0.0237553	0.208229	328	0.10003
MMP23A_5p_chr1_1631579_1631953_ENSG00000215914.3	-0.0591821	0.48266	313	0.103858
MMP23A_5p_chr1_1632800_1632926_ENSG00000215914.3	-0.00667481	0.118753	314	0.10003
MMP23A_5p_chr1_1633047_1633249_ENSG00000215914.3	-0.0471897	0.317131	313	0.10003
CDK11A_3p_chr1_1655766_1655239_ENSG00000008128.18	-0.153633	0.986156	328	0.287812
CDK11A_3p_chr1_1654271_1654027_ENSG00000008128.18	-0.000798501	0.102635	328	0.10003
CDK11A_3p_chr1_1653150_1653035_ENSG00000008128.18	-0.00283322	0.109717	328	0.10003
CDK11A_3p_chr1_1650894_1650767_ENSG00000008128.18	0.0231314	0.204285	328	0.10003
CDK11A_3p_chr1_1647917_1647785_ENSG00000008128.18	-0.0338738	0.285462	328	0.10003
CDK11A_3p_chr1_1643866_1643703_ENSG00000008128.18	-0.105301	0.863946	326	0.147414
CDK11A_3p_chr1_1641079_1640918_ENSG00000008128.18	-0.0667263	0.577592	327	0.108135
CDK11A_3p_chr1_1640572_1640477_ENSG00000008128.18	-0.0650211	0.543819	321	0.106461
CDK11A_3p_chr1_1640391_1640233_ENSG00000008128.18	-0.0368373	0.304063	327	0.10003
CDK11A_3p_chr1_1639684_1639619_ENSG00000008128.18	-0.0596185	0.504821	325	0.104912
CDK11A_3p_chr1_1639023_1638848_ENSG00000008128.18	-0.0828323	0.707663	327	0.116905
CDK11A_3p_chr1_1636464_1636343_ENSG00000008128.18	-0.00319622	0.110838	326	0.10003
CDK11A_3p_chr1_1636094_1635989_ENSG00000008128.18	-0.0282777	0.238945	327	0.10003
CDK11A_3p_chr1_1635783_1635662_ENSG00000008128.18	-0.032851	0.272759	328	0.10003
CDK11A_3p_chr1_1635585_1635478_ENSG00000008128.18	0.0187345	0.181788	327	0.10003
CDK11A_3p_chr1_1635434_1635263_ENSG00000008128.18	-0.00647702	0.123225	328	0.10003
CDK11A_3p_chr1_1635063_1634915_ENSG00000008128.18	0.0306968	0.257965	327	0.10003
CDK11A_3p_chr1_1634708_1634519_ENSG00000008128.18	0.0318333	0.263157	324	0.10003
RP1-283E3.4_5p_chr1_1661685_1663343_ENSG00000227775.3	-0.0261706	0.215132	298	0.10003
RP1-283E3.4_5p_chr1_1667256_1667414_ENSG00000227775.3	0.0199814	0.166922	208	0.10003
SLC35E2_3p_chr1_1677431_1677163_ENSG00000215790.2	-0.0159903	0.153202	230	0.10003
SLC35E2_3p_chr1_1676107_1675690_ENSG00000215790.2	0.00425906	0.112941	273	0.10003
SLC35E2_3p_chr1_1671143_1670675_ENSG00000215790.2	0.0419026	0.333756	303	0.10003
SLC35E2_3p_chr1_1670496_1670361_ENSG00000215790.2	0.0274466	0.231883	314	0.10003
SLC35E2_3p_chr1_1669887_1669760_ENSG00000215790.2	-0.0080109	0.12739	292	0.10003
SLC35E2_3p_chr1_1666713_1666643_ENSG00000215790.2	-0.0397255	0.314508	299	0.10003
SLC35E2_3p_chr1_1666274_1666129_ENSG00000215790.2	-0.00217529	0.107015	315	0.10003
NADK_3p_chr1_1711508_1711344_ENSG00000008130.11	-0.175621	0.561022	50	0.107029
NADK_3p_chr1_1710229_1710185_ENSG00000008130.11	-0.0137146	0.142173	241	0.10003
NADK_3p_chr1_1709909_1709728_ENSG00000008130.11	0.0858382	0.646266	328	0.111879
NADK_3p_chr1_1696885_1696667_ENSG00000008130.11	0.000144122	0.100477	328	0.100006
NADK_3p_chr1_1693474_1693391_ENSG00000008130.11	-0.00692362	0.125543	327	0.10003
NADK_3p_chr1_1691341_1691173_ENSG00000008130.11	0.0314449	0.257793	328	0.10003
NADK_3p_chr1_1690081_1689804_ENSG00000008130.11	-0.0738998	0.625263	327	0.110569
NADK_3p_chr1_1688321_1687942_ENSG00000008130.11	-0.000954009	0.10319	328	0.10003
NADK_3p_chr1_1687782_1687697_ENSG00000008130.11	0.0419078	0.353558	328	0.10003
NADK_3p_chr1_1686915_1686813_ENSG00000008130.11	0.0773358	0.664586	328	0.112857
NADK_3p_chr1_1686137_1685983_ENSG00000008130.11	-0.00381788	0.113354	328	0.10003
NADK_3p_chr1_1685822_1685723_ENSG00000008130.11	-0.00638153	0.123288	328	0.10003
NADK_3p_chr1_1685647_1685490_ENSG00000008130.11	-0.027045	0.228873	328	0.10003
NADK_3p_chr1_1685088_1685006_ENSG00000008130.11	0.0167891	0.170504	328	0.10003
GNB1_3p_chr1_1821840_1821803_ENSG00000078369.13	-0.0903755	0.712156	328	0.117331
GNB1_3p_chr1_1770677_1770629_ENSG00000078369.13	-0.0447596	0.360821	328	0.100211
GNB1_3p_chr1_1749314_1749276_ENSG00000078369.13	0.0588247	0.504351	328	0.104907
GNB1_3p_chr1_1747301_1747195_ENSG00000078369.13	-0.0442161	0.382779	328	0.100595
GNB1_3p_chr1_1737977_1737914_ENSG00000078369.13	-0.0970095	0.834531	328	0.137652
GNB1_3p_chr1_1736020_1735858_ENSG00000078369.13	-0.0594005	0.51564	328	0.105384
GNB1_3p_chr1_1724750_1724684_ENSG00000078369.13	-0.0366445	0.309329	328	0.10003
GNB1_3p_chr1_1722035_1721834_ENSG00000078369.13	-0.0392075	0.329699	328	0.10003
GNB1_3p_chr1_1720708_1720492_ENSG00000078369.13	0.0931129	0.804628	328	0.130891
GNB1_3p_chr1_1718876_1718761_ENSG00000078369.13	-0.0427929	0.34574	328	0.10003
CALML6_5p_chr1_1848191_1848335_ENSG00000169885.5	-0.243294	0.608411	33	0.109696
CALML6_5p_chr1_1848413_1848513_ENSG00000169885.5	-0.0464679	0.153779	41	0.10003
TMEM52_3p_chr1_1850712_1850332_ENSG00000178821.8	-0.16109	0.769063	122	0.124014
TMEM52_3p_chr1_1850236_1849692_ENSG00000178821.8	-0.100716	0.68783	203	0.114596
GABRD_5p_chr1_1956773_1956840_ENSG00000187730.6	0.0343502	0.142095	47	0.10003
GABRD_5p_chr1_1956957_1957177_ENSG00000187730.6	-0.0305737	0.148128	55	0.10003
GABRD_5p_chr1_1959016_1959098_ENSG00000187730.6	-0.0393687	0.162412	54	0.10003
GABRD_5p_chr1_1959594_1959731_ENSG00000187730.6	-0.0209385	0.128382	50	0.10003
GABRD_5p_chr1_1960550_1960705_ENSG00000187730.6	-0.0427837	0.168446	51	0.10003
GABRD_5p_chr1_1960990_1961201_ENSG00000187730.6	-0.0121055	0.11658	49	0.10003
GABRD_5p_chr1_1961422_1962192_ENSG00000187730.6	-0.0233337	0.133915	52	0.10003
PRKCZ_5p_chr1_1986880_1987001_ENSG00000067606.11	-0.0292804	0.216834	263	0.10003
PRKCZ_5p_chr1_1987923_1988012_ENSG00000067606.11	-0.00945384	0.130646	276	0.10003
PRKCZ_5p_chr1_1990980_1991030_ENSG00000067606.11	-0.0308648	0.230797	274	0.10003
PRKCZ_5p_chr1_2002738_2002975_ENSG00000067606.11	0.0181585	0.169025	278	0.10003
PRKCZ_5p_chr1_2029786_2029994_ENSG00000067606.11	0.0561008	0.430791	284	0.101967
PRKCZ_5p_chr1_2066701_2066786_ENSG00000067606.11	-0.084488	0.562543	287	0.10716
PRKCZ_5p_chr1_2076777_2076950_ENSG00000067606.11	-0.103943	0.834741	289	0.137722
PRKCZ_5p_chr1_2077466_2077547_ENSG00000067606.11	-0.0676703	0.407589	289	0.101354
PRKCZ_5p_chr1_2080311_2080363_ENSG00000067606.11	-0.0806061	0.528064	291	0.105822
PRKCZ_5p_chr1_2082229_2082418_ENSG00000067606.11	-0.0823068	0.638193	291	0.111385
PRKCZ_5p_chr1_2087434_2087531_ENSG00000067606.11	-0.0417589	0.312011	302	0.10003
PRKCZ_5p_chr1_2100957_2101043_ENSG00000067606.11	-0.0369198	0.289351	297	0.10003
PRKCZ_5p_chr1_2103494_2103629_ENSG00000067606.11	-0.0496356	0.382041	294	0.100595
PRKCZ_5p_chr1_2103740_2103827_ENSG00000067606.11	-0.0383128	0.296004	294	0.10003
PRKCZ_5p_chr1_2105336_2105455_ENSG00000067606.11	-0.0509368	0.395536	291	0.101077
PRKCZ_5p_chr1_2106193_2106272_ENSG00000067606.11	-0.03585	0.276366	294	0.10003
PRKCZ_5p_chr1_2106663_2106752_ENSG00000067606.11	-0.0597801	0.469873	296	0.103374
C1orf86_3p_chr1_2132664_2129446_ENSG00000162585.12	-0.182855	0.579457	56	0.10837
C1orf86_3p_chr1_2126214_2126127_ENSG00000162585.12	-0.0276087	0.231962	327	0.10003
C1orf86_3p_chr1_2125652_2125437_ENSG00000162585.12	0.0259663	0.21964	328	0.10003
C1orf86_3p_chr1_2125349_2125078_ENSG00000162585.12	-0.0463142	0.387291	328	0.100842
C1orf86_3p_chr1_2118645_2118277_ENSG00000162585.12	-0.0243381	0.20489	305	0.10003
C1orf86_3p_chr1_2117688_2117443_ENSG00000162585.12	-0.038836	0.303641	311	0.10003
SKI_5p_chr1_2234417_2234542_ENSG00000157933.9	-0.0199256	0.190224	326	0.10003
SKI_5p_chr1_2234724_2234839_ENSG00000157933.9	-0.0479347	0.407051	328	0.101339
SKI_5p_chr1_2235279_2235541_ENSG00000157933.9	-0.0434803	0.366975	327	0.100281
SKI_5p_chr1_2235732_2236024_ENSG00000157933.9	-0.0474433	0.393332	326	0.101047
SKI_5p_chr1_2237459_2237689_ENSG00000157933.9	-0.00343781	0.111916	328	0.10003
SKI_5p_chr1_2238016_2241558_ENSG00000157933.9	-0.092207	0.795367	326	0.128806
MORN1_3p_chr1_2323146_2322897_ENSG00000116151.9	0.015569	0.162565	319	0.10003
MORN1_3p_chr1_2321435_2321364_ENSG00000116151.9	-0.00185801	0.105939	322	0.10003
MORN1_3p_chr1_2316504_2316417_ENSG00000116151.9	0.0162349	0.161003	315	0.10003
MORN1_3p_chr1_2305996_2305900_ENSG00000116151.9	0.0306874	0.247004	314	0.10003
MORN1_3p_chr1_2304030_2303920_ENSG00000116151.9	0.0151409	0.154243	286	0.10003
MORN1_3p_chr1_2290154_2290031_ENSG00000116151.9	-0.100558	0.682856	216	0.1142
MORN1_3p_chr1_2289037_2288871_ENSG00000116151.9	-0.0305053	0.194267	155	0.10003
MORN1_3p_chr1_2268289_2268156_ENSG00000116151.9	-0.17802	0.692417	77	0.115122
MORN1_3p_chr1_2267987_2267908_ENSG00000116151.9	-0.240814	0.723163	55	0.118692
RER1_5p_chr1_2330854_2330953_ENSG00000157916.14	0.128139	0.943592	328	0.195223
PEX10_3p_chr1_2345236_2345036_ENSG00000157911.5	-0.141271	0.657957	126	0.112439
PEX10_3p_chr1_2344010_2343830_ENSG00000157911.5	-0.0312366	0.242203	327	0.10003
PEX10_3p_chr1_2342312_2342069_ENSG00000157911.5	0.066559	0.529364	327	0.10587
PEX10_3p_chr1_2340297_2339891_ENSG00000157911.5	0.0149837	0.157397	328	0.10003
PEX10_3p_chr1_2338394_2338159_ENSG00000157911.5	-0.0201664	0.18805	328	0.10003
PEX10_3p_chr1_2338058_2337923_ENSG00000157911.5	-0.0270941	0.232067	327	0.10003
PLCH2_5p_chr1_2361777_2362068_ENSG00000149527.13	-0.508668	0.974357	35	0.242317
PLCH2_5p_chr1_2409915_2410061_ENSG00000149527.13	-0.387562	0.931361	55	0.184844
PLCH2_5p_chr1_2411173_2411417_ENSG00000149527.13	-0.371844	0.9202	61	0.176408
PLCH2_5p_chr1_2411622_2411751_ENSG00000149527.13	-0.463737	0.96629	52	0.224744
PLCH2_5p_chr1_2415887_2416057_ENSG00000149527.13	-0.35649	0.933385	72	0.186285
PLCH2_5p_chr1_2418346_2418439_ENSG00000149527.13	-0.259936	0.78449	71	0.126671
PLCH2_5p_chr1_2418612_2418815_ENSG00000149527.13	-0.297258	0.812989	61	0.132837
PLCH2_5p_chr1_2419037_2419157_ENSG00000149527.13	-0.30894	0.868624	62	0.149339
PLCH2_5p_chr1_2420646_2420817_ENSG00000149527.13	-0.248298	0.786495	72	0.127115
PLCH2_5p_chr1_2421199_2421306_ENSG00000149527.13	-0.307138	0.864804	65	0.147889
PLCH2_5p_chr1_2422631_2422774_ENSG00000149527.13	-0.259768	0.843082	88	0.140696
PLCH2_5p_chr1_2426295_2426387_ENSG00000149527.13	-0.308187	0.912016	75	0.170303
PLCH2_5p_chr1_2426927_2427009_ENSG00000149527.13	-0.387589	0.969047	76	0.230158
PLCH2_5p_chr1_2428046_2428143_ENSG00000149527.13	-0.2818	0.804046	66	0.13081
PLCH2_5p_chr1_2428267_2428449_ENSG00000149527.13	-0.374146	0.962873	79	0.219657
PLCH2_5p_chr1_2428941_2429048_ENSG00000149527.13	-0.136	0.445033	72	0.102346
PLCH2_5p_chr1_2429962_2430086_ENSG00000149527.13	-0.339929	0.927043	71	0.181907
PLCH2_5p_chr1_2430183_2430267_ENSG00000149527.13	-0.36797	0.919088	65	0.175374
PLCH2_5p_chr1_2430523_2430669_ENSG00000149527.13	-0.373845	0.917354	61	0.174655
PLCH2_5p_chr1_2431080_2431159_ENSG00000149527.13	-0.356496	0.944018	74	0.196029
PLCH2_5p_chr1_2433551_2434525_ENSG00000149527.13	-0.402657	0.917437	54	0.17471
PLCH2_5p_chr1_2435056_2436965_ENSG00000149527.13	-0.157657	0.344209	47	0.10003
RP3-395M20.2_3p_chr1_2424697_2424540_ENSG00000224387.1	-0.0357112	0.163976	76	0.10003
RP3-395M20.3_3p_chr1_2425918_2425822_ENSG00000229393.1	0.157066	0.672514	76	0.113675
PANK4_3p_chr1_2458039_2457903_ENSG00000157881.9	-0.0715054	0.628246	328	0.11069
PANK4_3p_chr1_2457626_2457040_ENSG00000157881.9	0.0775277	0.679809	328	0.114147
PANK4_3p_chr1_2453380_2452540_ENSG00000157881.9	-0.0347375	0.286494	328	0.10003
PANK4_3p_chr1_2452345_2452162_ENSG00000157881.9	-0.0647448	0.565078	327	0.107256
PANK4_3p_chr1_2451853_2451761_ENSG00000157881.9	-0.0575488	0.499246	327	0.104655
PANK4_3p_chr1_2451393_2451240_ENSG00000157881.9	-0.0256873	0.220343	328	0.10003
PANK4_3p_chr1_2450763_2450582_ENSG00000157881.9	-0.0580863	0.503478	327	0.104798
PANK4_3p_chr1_2450036_2449955_ENSG00000157881.9	0.0014728	0.104955	327	0.10003
PANK4_3p_chr1_2449703_2449603_ENSG00000157881.9	-0.00778309	0.129117	328	0.10003
PANK4_3p_chr1_2447156_2447001_ENSG00000157881.9	0.0227514	0.206856	328	0.10003
PANK4_3p_chr1_2444478_2444327_ENSG00000157881.9	0.0906632	0.766514	327	0.123547
PANK4_3p_chr1_2443122_2443067_ENSG00000157881.9	-0.0512174	0.434309	328	0.102057
PANK4_3p_chr1_2442826_2442777_ENSG00000157881.9	-0.0228817	0.206441	328	0.10003
PANK4_3p_chr1_2442221_2442117_ENSG00000157881.9	-0.0603821	0.518163	328	0.105435
PANK4_3p_chr1_2441596_2441496_ENSG00000157881.9	-0.0757485	0.665451	327	0.112926
RP3-395M20.8_3p_chr1_2488470_2488416_ENSG00000238164.2	-0.0677383	0.434307	237	0.102057
RP3-395M20.8_3p_chr1_2487077_2486163_ENSG00000238164.2	-0.222423	0.497254	22	0.104475
RP3-395M20.8_3p_chr1_2485735_2482431_ENSG00000238164.2	-0.246144	0.912819	56	0.170607
TNFRSF14_5p_chr1_2489165_2489273_ENSG00000157873.13	-0.0869337	0.654712	235	0.112397
TNFRSF14_5p_chr1_2489782_2489907_ENSG00000157873.13	-0.0833051	0.626392	235	0.110657
TNFRSF14_5p_chr1_2490320_2490595_ENSG00000157873.13	-0.124155	0.829026	231	0.136262
TNFRSF14_5p_chr1_2491262_2491417_ENSG00000157873.13	-0.0848328	0.611797	219	0.1098
TNFRSF14_5p_chr1_2492063_2492153_ENSG00000157873.13	-0.0874027	0.652985	232	0.112397
TNFRSF14_5p_chr1_2492933_2493396_ENSG00000157873.13	-0.0166451	0.15518	228	0.10003
TNFRSF14_5p_chr1_2494304_2494335_ENSG00000157873.13	-0.0707191	0.527655	238	0.105818
TNFRSF14_5p_chr1_2494587_2495268_ENSG00000157873.13	-0.0748865	0.55188	230	0.106851
FAM213B_5p_chr1_2519180_2519231_ENSG00000157870.10	-0.112151	0.88767	323	0.157252
FAM213B_5p_chr1_2519775_2520479_ENSG00000157870.10	-0.0876153	0.746259	323	0.121118
FAM213B_5p_chr1_2520849_2522077_ENSG00000157870.10	-0.0419053	0.345891	326	0.10003
MMEL1_3p_chr1_2524159_2524094_ENSG00000142606.11	-0.179455	0.716715	70	0.117679
MMEL1_3p_chr1_2523466_2523371_ENSG00000142606.11	-0.175871	0.672193	66	0.113651
MMEL1_3p_chr1_2523072_2522996_ENSG00000142606.11	-0.179947	0.732063	73	0.119391
LINC00982_3p_chr1_2984612_2983901_ENSG00000177133.6	1.0181	0.590008	32	0.108525
PRDM16_5p_chr1_3102689_3103038_ENSG00000142611.12	0.587837	0.514698	77	0.105363
PRDM16_5p_chr1_3160651_3160701_ENSG00000142611.12	1.05577	0.237519	63	0.10003
PRDM16_5p_chr1_3301713_3301850_ENSG00000142611.12	-0.30301	0.894564	65	0.160884
PRDM16_5p_chr1_3303240_3303482_ENSG00000142611.12	0.126859	0.400707	63	0.101314
PRDM16_5p_chr1_3313055_3313157_ENSG00000142611.12	1.44436	0.512315	63	0.105298
PRDM16_5p_chr1_3319355_3319562_ENSG00000142611.12	11.6799	0.637486	62	0.111315
PRDM16_5p_chr1_3321303_3321450_ENSG00000142611.12	3.50894	0.768201	63	0.123809
PRDM16_5p_chr1_3322059_3322212_ENSG00000142611.12	7.36132	0.592732	53	0.108695
PRDM16_5p_chr1_3327948_3329364_ENSG00000142611.12	0.953372	0.322773	46	0.10003
PRDM16_5p_chr1_3331124_3331211_ENSG00000142611.12	0.10402	0.276673	61	0.10003
PRDM16_5p_chr1_3334392_3334561_ENSG00000142611.12	2.22404	0.817753	57	0.134085
PRDM16_5p_chr1_3335231_3335308_ENSG00000142611.12	1.94766	0.834242	51	0.137569
PRDM16_5p_chr1_3342145_3342314_ENSG00000142611.12	1.39697	0.756274	58	0.122635
PRDM16_5p_chr1_3342615_3342789_ENSG00000142611.12	1.0744	0.882271	74	0.15479
PRDM16_5p_chr1_3347436_3347672_ENSG00000142611.12	4.15509	0.836663	75	0.138334
PRDM16_5p_chr1_3348530_3348704_ENSG00000142611.12	0.0510593	0.163481	62	0.10003
PRDM16_5p_chr1_3350241_3355185_ENSG00000142611.12	0.191314	0.280079	57	0.10003
RP1-163G9.2_3p_chr1_3050273_3050137_ENSG00000226286.1	-0.0957107	0.347317	77	0.10003
ARHGEF16_5p_chr1_3379630_3380236_ENSG00000130762.10	-0.0222635	0.169765	210	0.10003
ARHGEF16_5p_chr1_3385997_3386157_ENSG00000130762.10	0.0382549	0.262456	262	0.10003
ARHGEF16_5p_chr1_3389642_3389794_ENSG00000130762.10	-0.0179877	0.163383	262	0.10003
ARHGEF16_5p_chr1_3389957_3390086_ENSG00000130762.10	0.0204587	0.17438	265	0.10003
ARHGEF16_5p_chr1_3391272_3391346_ENSG00000130762.10	0.00919052	0.129397	270	0.10003
ARHGEF16_5p_chr1_3392534_3392626_ENSG00000130762.10	-0.00955021	0.130259	267	0.10003
ARHGEF16_5p_chr1_3394439_3394590_ENSG00000130762.10	0.000426809	0.101233	268	0.10003
ARHGEF16_5p_chr1_3394988_3395176_ENSG00000130762.10	0.0129748	0.143398	263	0.10003
ARHGEF16_5p_chr1_3396081_3396154_ENSG00000130762.10	-0.0190757	0.167342	261	0.10003
ARHGEF16_5p_chr1_3396376_3396477_ENSG00000130762.10	-0.00771122	0.123469	260	0.10003
ARHGEF16_5p_chr1_3397012_3397677_ENSG00000130762.10	-0.0155663	0.153438	260	0.10003
MEGF6_3p_chr1_3528059_3527702_ENSG00000162591.11	-0.0173885	0.126899	78	0.10003
MEGF6_3p_chr1_3519164_3519030_ENSG00000162591.11	0.0175769	0.129064	110	0.10003
MEGF6_3p_chr1_3512011_3511902_ENSG00000162591.11	0.019555	0.141066	128	0.10003
MEGF6_3p_chr1_3496493_3496389_ENSG00000162591.11	0.0876996	0.35808	111	0.100118
MEGF6_3p_chr1_3463687_3463562_ENSG00000162591.11	-0.0491709	0.237767	116	0.10003
MEGF6_3p_chr1_3448012_3447644_ENSG00000162591.11	-0.147441	0.897569	223	0.162781
MEGF6_3p_chr1_3440810_3440688_ENSG00000162591.11	-0.0667168	0.47625	232	0.103619
MEGF6_3p_chr1_3432091_3431966_ENSG00000162591.11	-0.167984	0.977803	246	0.252504
MEGF6_3p_chr1_3431236_3431114_ENSG00000162591.11	-0.101081	0.752734	241	0.122084
MEGF6_3p_chr1_3428692_3428570_ENSG00000162591.11	-0.158591	0.96716	245	0.225951
MEGF6_3p_chr1_3428251_3428114_ENSG00000162591.11	-0.0442058	0.298796	229	0.10003
MEGF6_3p_chr1_3427466_3427347_ENSG00000162591.11	-0.150766	0.928198	220	0.183175
MEGF6_3p_chr1_3426556_3426434_ENSG00000162591.11	-0.179442	0.962479	202	0.218954
MEGF6_3p_chr1_3425809_3425639_ENSG00000162591.11	-0.0813242	0.576121	231	0.108061
MEGF6_3p_chr1_3425253_3425122_ENSG00000162591.11	-0.0113244	0.135813	239	0.10003
MEGF6_3p_chr1_3424487_3424359_ENSG00000162591.11	-0.0715469	0.492244	233	0.104287
MEGF6_3p_chr1_3422800_3422672_ENSG00000162591.11	-0.0553547	0.381824	232	0.100595
MEGF6_3p_chr1_3422120_3421986_ENSG00000162591.11	-0.10024	0.73716	242	0.119935
MEGF6_3p_chr1_3421906_3421772_ENSG00000162591.11	-0.0912169	0.672477	244	0.113675
MEGF6_3p_chr1_3418485_3418360_ENSG00000162591.11	0.013617	0.139453	195	0.10003
MEGF6_3p_chr1_3417872_3417741_ENSG00000162591.11	-0.0964482	0.698526	241	0.115815
MEGF6_3p_chr1_3417658_3417530_ENSG00000162591.11	-0.0450508	0.305911	233	0.10003
MEGF6_3p_chr1_3417328_3417197_ENSG00000162591.11	-0.0742699	0.519818	233	0.105528
MEGF6_3p_chr1_3416488_3416360_ENSG00000162591.11	-0.0836354	0.605329	235	0.109466
MEGF6_3p_chr1_3416280_3416152_ENSG00000162591.11	-0.0714694	0.479865	216	0.10375
MEGF6_3p_chr1_3415830_3415702_ENSG00000162591.11	-0.214788	0.988226	212	0.302114
MEGF6_3p_chr1_3415390_3415262_ENSG00000162591.11	-0.0963723	0.664379	219	0.112857
MEGF6_3p_chr1_3415063_3414935_ENSG00000162591.11	-0.123972	0.801917	198	0.130241
MEGF6_3p_chr1_3414185_3414055_ENSG00000162591.11	0.0431501	0.276192	200	0.10003
MEGF6_3p_chr1_3413925_3413797_ENSG00000162591.11	-0.0520443	0.358037	235	0.100118
MEGF6_3p_chr1_3413683_3413552_ENSG00000162591.11	-0.116427	0.834231	240	0.137569
MEGF6_3p_chr1_3413347_3413219_ENSG00000162591.11	-0.0711061	0.51021	243	0.105148
MEGF6_3p_chr1_3412582_3412454_ENSG00000162591.11	-0.0512642	0.359523	248	0.100192
MEGF6_3p_chr1_3411305_3411177_ENSG00000162591.11	-0.112325	0.78505	225	0.126803
MEGF6_3p_chr1_3411063_3410935_ENSG00000162591.11	-0.0782633	0.567882	243	0.107383
MEGF6_3p_chr1_3410688_3410560_ENSG00000162591.11	-0.0926739	0.687121	247	0.114499
MEGF6_3p_chr1_3410463_3410335_ENSG00000162591.11	-0.143158	0.932464	256	0.185763
MEGF6_3p_chr1_3409331_3409203_ENSG00000162591.11	-0.0965485	0.691071	247	0.114953
MEGF6_3p_chr1_3407523_3407476_ENSG00000162591.11	-0.0451355	0.314409	248	0.10003
TPRG1L_5p_chr1_3541988_3542079_ENSG00000158109.10	-0.0445582	0.360478	326	0.100211
TPRG1L_5p_chr1_3542277_3542453_ENSG00000158109.10	-0.039944	0.319997	326	0.10003
TPRG1L_5p_chr1_3544064_3544217_ENSG00000158109.10	-0.0747928	0.628442	327	0.110706
TPRG1L_5p_chr1_3544973_3546691_ENSG00000158109.10	-0.0563416	0.467692	327	0.103374
WRAP73_3p_chr1_3569325_3569277_ENSG00000116213.11	0.0637221	0.353174	156	0.10003
WRAP73_3p_chr1_3566637_3566495_ENSG00000116213.11	-0.0268405	0.22671	327	0.10003
WRAP73_3p_chr1_3564124_3563972_ENSG00000116213.11	-0.0536419	0.438661	327	0.102201
WRAP73_3p_chr1_3563346_3563230_ENSG00000116213.11	-0.0602504	0.506591	327	0.104993
WRAP73_3p_chr1_3552594_3552508_ENSG00000116213.11	0.0176761	0.175125	327	0.10003
WRAP73_3p_chr1_3551858_3551724_ENSG00000116213.11	-0.0214214	0.197401	327	0.10003
WRAP73_3p_chr1_3551638_3551561_ENSG00000116213.11	-0.036046	0.288772	327	0.10003
WRAP73_3p_chr1_3550067_3549962_ENSG00000116213.11	-0.034932	0.2808	327	0.10003
WRAP73_3p_chr1_3548902_3548777_ENSG00000116213.11	-0.0278407	0.23339	327	0.10003
TP73_5p_chr1_3598897_3598994_ENSG00000078900.10	-0.0231707	0.164304	152	0.10003
TP73_5p_chr1_3599624_3599744_ENSG00000078900.10	-0.0619847	0.359558	172	0.100194
TP73_5p_chr1_3624113_3624355_ENSG00000078900.10	-0.0676688	0.387552	168	0.100848
TP73_5p_chr1_3638585_3638771_ENSG00000078900.10	-0.0776976	0.522789	215	0.105588
TP73_5p_chr1_3639918_3640033_ENSG00000078900.10	0.0309879	0.210102	202	0.10003
TP73_5p_chr1_3643679_3643788_ENSG00000078900.10	-0.0779926	0.499712	198	0.104661
TP73_5p_chr1_3644192_3644334_ENSG00000078900.10	-0.0509336	0.295247	171	0.10003
TP73_5p_chr1_3644693_3644781_ENSG00000078900.10	-0.0686608	0.436503	202	0.102084
TP73_5p_chr1_3645891_3646012_ENSG00000078900.10	-0.0924896	0.600554	201	0.109002
TP73_5p_chr1_3646564_3646712_ENSG00000078900.10	-0.0652741	0.407002	188	0.101339
TP73_5p_chr1_3647491_3647629_ENSG00000078900.10	-0.104027	0.646967	183	0.111946
TP73_5p_chr1_3648027_3648120_ENSG00000078900.10	-0.132531	0.790648	199	0.127885
TP73_5p_chr1_3649311_3652547_ENSG00000078900.10	-0.0884803	0.564287	196	0.107221
RP5-1092A11.5_3p_chr1_3585336_3585189_ENSG00000227589.1	0.0761202	0.396233	150	0.101121
RP5-1092A11.5_3p_chr1_3578829_3578717_ENSG00000227589.1	-0.0264855	0.166445	148	0.10003
TP73-AS1_3p_chr1_3663900_3662171_ENSG00000227372.6	-0.0154825	0.149072	252	0.10003
TP73-AS1_3p_chr1_3659754_3659625_ENSG00000227372.6	0.040775	0.274849	249	0.10003
TP73-AS1_3p_chr1_3659521_3659368_ENSG00000227372.6	-0.000466837	0.101219	252	0.10003
TP73-AS1_3p_chr1_3659081_3658994_ENSG00000227372.6	0.0125715	0.142239	252	0.10003
SMIM1_5p_chr1_3691863_3692234_ENSG00000235169.3	0.0229781	0.152817	172	0.10003
SMIM1_5p_chr1_3692359_3692546_ENSG00000235169.3	0.0405296	0.199164	164	0.10003
LRRC47_3p_chr1_3713068_3712426_ENSG00000130764.5	-0.028788	0.23658	326	0.10003
LRRC47_3p_chr1_3703874_3703413_ENSG00000130764.5	-0.038041	0.312497	326	0.10003
LRRC47_3p_chr1_3700475_3700334_ENSG00000130764.5	0.0136508	0.152738	326	0.10003
CEP104_3p_chr1_3773778_3773453_ENSG00000116198.8	-0.00940542	0.134053	303	0.10003
CEP104_3p_chr1_3768985_3768859_ENSG00000116198.8	-0.00149012	0.104959	325	0.10003
CEP104_3p_chr1_3765345_3765172_ENSG00000116198.8	0.0700612	0.611333	326	0.1098
CEP104_3p_chr1_3764177_3764039_ENSG00000116198.8	0.0320045	0.267626	326	0.10003
CEP104_3p_chr1_3761915_3761853_ENSG00000116198.8	0.0408159	0.341778	326	0.10003
CEP104_3p_chr1_3761547_3761471_ENSG00000116198.8	0.0144297	0.159337	326	0.10003
CEP104_3p_chr1_3756340_3756172_ENSG00000116198.8	0.0349113	0.292627	326	0.10003
CEP104_3p_chr1_3755683_3755528_ENSG00000116198.8	-0.00783959	0.128624	326	0.10003
CEP104_3p_chr1_3754083_3753856_ENSG00000116198.8	0.046396	0.387781	325	0.100848
CEP104_3p_chr1_3753256_3753059_ENSG00000116198.8	0.0698211	0.61512	326	0.10984
CEP104_3p_chr1_3751656_3751489_ENSG00000116198.8	0.0415592	0.350261	325	0.10003
CEP104_3p_chr1_3750599_3750426_ENSG00000116198.8	0.0341829	0.286702	326	0.10003
CEP104_3p_chr1_3747786_3747610_ENSG00000116198.8	0.00394809	0.113646	323	0.10003
CEP104_3p_chr1_3746561_3746355_ENSG00000116198.8	0.0905865	0.785196	325	0.126803
CEP104_3p_chr1_3743308_3743272_ENSG00000116198.8	0.0560953	0.484982	326	0.103948
CEP104_3p_chr1_3743000_3742934_ENSG00000116198.8	0.05094	0.437516	326	0.10213
CEP104_3p_chr1_3740126_3739988_ENSG00000116198.8	-0.00515176	0.11742	326	0.10003
DFFB_5p_chr1_3775282_3775430_ENSG00000169598.11	-0.0260944	0.223672	315	0.10003
DFFB_5p_chr1_3782207_3782564_ENSG00000169598.11	0.0787231	0.664666	306	0.112857
DFFB_5p_chr1_3782848_3782962_ENSG00000169598.11	0.00288401	0.109484	318	0.10003
DFFB_5p_chr1_3784538_3784617_ENSG00000169598.11	-0.0608534	0.513046	317	0.105332
DFFB_5p_chr1_3786169_3786339_ENSG00000169598.11	-0.0716377	0.613336	319	0.1098
DFFB_5p_chr1_3789036_3789136_ENSG00000169598.11	-0.0593202	0.484414	318	0.103924
DFFB_5p_chr1_3789578_3789701_ENSG00000169598.11	-0.043315	0.349777	321	0.10003
DFFB_5p_chr1_3800071_3800627_ENSG00000169598.11	-0.0563178	0.454429	322	0.10268
C1orf174_3p_chr1_3816849_3816736_ENSG00000198912.6	0.0283056	0.242234	326	0.10003
C1orf174_3p_chr1_3812747_3811859_ENSG00000198912.6	-0.0482454	0.402513	326	0.101337
C1orf174_3p_chr1_3809560_3809447_ENSG00000198912.6	0.00601154	0.121569	326	0.10003
C1orf174_3p_chr1_3807621_3807133_ENSG00000198912.6	0.0200428	0.189015	326	0.10003
RP13-15E13.1_5p_chr1_3820529_3820600_ENSG00000236423.1	-0.0288075	0.127641	34	0.10003
RP13-15E13.1_5p_chr1_3821795_3822096_ENSG00000236423.1	-0.321386	0.849435	45	0.142522
RP13-15E13.1_5p_chr1_3830256_3830854_ENSG00000236423.1	0.157815	0.403464	38	0.101337
RP13-15E13.1_5p_chr1_3830959_3833789_ENSG00000236423.1	0.081172	0.242095	50	0.10003
AJAP1_5p_chr1_4771960_4772759_ENSG00000196581.6	-0.998101	0.356694	39	0.100071
AJAP1_5p_chr1_4829913_4830000_ENSG00000196581.6	-0.0188507	0.101268	56	0.10003
AJAP1_5p_chr1_4832340_4832585_ENSG00000196581.6	0.142448	0.339738	55	0.10003
AJAP1_5p_chr1_4834487_4834618_ENSG00000196581.6	0.14183	0.344719	57	0.10003
AJAP1_5p_chr1_4837461_4837854_ENSG00000196581.6	-0.34505	0.873799	54	0.15058
AJAP1_5p_chr1_4842605_4852594_ENSG00000196581.6	-3.38442	0.315811	52	0.10003
NPHP4_3p_chr1_6052422_6052304_ENSG00000131697.13	0.0542609	0.438612	294	0.102201
NPHP4_3p_chr1_6046387_6046215_ENSG00000131697.13	-0.0159722	0.165578	317	0.10003
NPHP4_3p_chr1_6038473_6038330_ENSG00000131697.13	0.00830351	0.130778	318	0.10003
NPHP4_3p_chr1_6029319_6029147_ENSG00000131697.13	0.03363	0.284947	324	0.10003
NPHP4_3p_chr1_6027423_6027359_ENSG00000131697.13	0.0365124	0.308662	324	0.10003
NPHP4_3p_chr1_6022009_6021854_ENSG00000131697.13	0.0239622	0.215652	320	0.10003
NPHP4_3p_chr1_6012896_6012760_ENSG00000131697.13	0.00350692	0.111497	311	0.10003
NPHP4_3p_chr1_6008311_6008130_ENSG00000131697.13	0.0327406	0.278139	321	0.10003
NPHP4_3p_chr1_6007290_6007164_ENSG00000131697.13	0.0330718	0.281447	322	0.10003
NPHP4_3p_chr1_5993389_5993207_ENSG00000131697.13	0.00941915	0.136233	320	0.10003
NPHP4_3p_chr1_5987847_5987709_ENSG00000131697.13	0.0397002	0.336141	320	0.10003
NPHP4_3p_chr1_5969273_5969212_ENSG00000131697.13	-0.0626092	0.535152	322	0.106086
NPHP4_3p_chr1_5967282_5967175_ENSG00000131697.13	0.0342082	0.274014	323	0.10003
NPHP4_3p_chr1_5965843_5965692_ENSG00000131697.13	-0.0176125	0.176697	320	0.10003
NPHP4_3p_chr1_5965543_5965352_ENSG00000131697.13	-0.0147301	0.161406	319	0.10003
NPHP4_3p_chr1_5964864_5964677_ENSG00000131697.13	-0.00617343	0.122295	315	0.10003
NPHP4_3p_chr1_5951088_5950928_ENSG00000131697.13	-0.0434145	0.363134	321	0.100247
NPHP4_3p_chr1_5947526_5947346_ENSG00000131697.13	-0.12425	0.933106	322	0.186285
NPHP4_3p_chr1_5940299_5940174_ENSG00000131697.13	-0.0216923	0.196729	323	0.10003
NPHP4_3p_chr1_5939692_5939406_ENSG00000131697.13	0.0275694	0.235978	320	0.10003
NPHP4_3p_chr1_5937358_5937153_ENSG00000131697.13	-0.0347428	0.288168	324	0.10003
NPHP4_3p_chr1_5935160_5934934_ENSG00000131697.13	0.0212465	0.19574	324	0.10003
NPHP4_3p_chr1_5934717_5934531_ENSG00000131697.13	0.0653149	0.560575	323	0.107029
NPHP4_3p_chr1_5933395_5933312_ENSG00000131697.13	-0.0350112	0.292302	325	0.10003
NPHP4_3p_chr1_5927956_5927800_ENSG00000131697.13	-0.0396477	0.324158	323	0.10003
NPHP4_3p_chr1_5927175_5927090_ENSG00000131697.13	-0.0155276	0.165135	325	0.10003
NPHP4_3p_chr1_5926518_5926433_ENSG00000131697.13	-0.0050414	0.117629	324	0.10003
NPHP4_3p_chr1_5925333_5925162_ENSG00000131697.13	-0.044589	0.350666	322	0.10003
NPHP4_3p_chr1_5924577_5924398_ENSG00000131697.13	-0.0521644	0.423091	322	0.101871
NPHP4_3p_chr1_5924093_5923950_ENSG00000131697.13	-0.0362173	0.295194	320	0.10003
KCNAB2_5p_chr1_6055923_6056144_ENSG00000069424.10	-0.0146119	0.157366	307	0.10003
KCNAB2_5p_chr1_6078695_6078895_ENSG00000069424.10	0.0484193	0.378583	303	0.100484
KCNAB2_5p_chr1_6100577_6100629_ENSG00000069424.10	0.00142131	0.104715	304	0.10003
KCNAB2_5p_chr1_6101891_6101932_ENSG00000069424.10	-0.0251609	0.206414	303	0.10003
KCNAB2_5p_chr1_6111571_6111814_ENSG00000069424.10	-0.0933577	0.755844	303	0.122607
KCNAB2_5p_chr1_6132815_6132858_ENSG00000069424.10	0.018459	0.179376	303	0.10003
KCNAB2_5p_chr1_6133793_6133830_ENSG00000069424.10	0.0179891	0.177726	306	0.10003
KCNAB2_5p_chr1_6142255_6142334_ENSG00000069424.10	0.0137092	0.154946	304	0.10003
KCNAB2_5p_chr1_6145264_6145309_ENSG00000069424.10	0.00303376	0.110249	302	0.10003
KCNAB2_5p_chr1_6145800_6146423_ENSG00000069424.10	-0.0501589	0.389759	303	0.10091
KCNAB2_5p_chr1_6147527_6147571_ENSG00000069424.10	0.0275908	0.234654	300	0.10003
KCNAB2_5p_chr1_6149068_6149111_ENSG00000069424.10	0.0244181	0.212492	294	0.10003
KCNAB2_5p_chr1_6150449_6150535_ENSG00000069424.10	0.0150655	0.161118	298	0.10003
KCNAB2_5p_chr1_6151323_6151367_ENSG00000069424.10	-0.0770849	0.653614	299	0.112397
KCNAB2_5p_chr1_6154460_6154545_ENSG00000069424.10	0.0110342	0.142199	299	0.10003
KCNAB2_5p_chr1_6155383_6155503_ENSG00000069424.10	0.0138454	0.153979	288	0.10003
KCNAB2_5p_chr1_6155590_6155685_ENSG00000069424.10	0.0221701	0.199051	294	0.10003
KCNAB2_5p_chr1_6156696_6156816_ENSG00000069424.10	0.0146717	0.156953	280	0.10003
KCNAB2_5p_chr1_6157329_6161253_ENSG00000069424.10	0.0259281	0.21861	280	0.10003
CHD5_3p_chr1_6240183_6240005_ENSG00000116254.13	-0.0362495	0.171973	73	0.10003
CHD5_3p_chr1_6228337_6228210_ENSG00000116254.13	0.0838898	0.305788	79	0.10003
CHD5_3p_chr1_6219575_6219396_ENSG00000116254.13	-0.0500566	0.230401	82	0.10003
CHD5_3p_chr1_6215777_6215659_ENSG00000116254.13	0.00822861	0.114922	75	0.10003
CHD5_3p_chr1_6214958_6214720_ENSG00000116254.13	-0.00247046	0.103768	79	0.10003
CHD5_3p_chr1_6212596_6212472_ENSG00000116254.13	0.0514354	0.259898	106	0.10003
CHD5_3p_chr1_6211215_6211092_ENSG00000116254.13	0.0732738	0.344082	93	0.10003
CHD5_3p_chr1_6209472_6209306_ENSG00000116254.13	-0.0118893	0.123254	80	0.10003
CHD5_3p_chr1_6209135_6208914_ENSG00000116254.13	0.00585092	0.11061	83	0.10003
CHD5_3p_chr1_6206931_6206725_ENSG00000116254.13	0.00956784	0.117357	75	0.10003
CHD5_3p_chr1_6206483_6206272_ENSG00000116254.13	-0.0160994	0.131416	78	0.10003
CHD5_3p_chr1_6204215_6204084_ENSG00000116254.13	-0.0412627	0.201864	81	0.10003
CHD5_3p_chr1_6203991_6203883_ENSG00000116254.13	0.000173629	0.100312	94	0.100002
CHD5_3p_chr1_6202665_6202474_ENSG00000116254.13	-0.0153695	0.129108	72	0.10003
CHD5_3p_chr1_6202388_6202188_ENSG00000116254.13	0.00606338	0.110508	72	0.10003
CHD5_3p_chr1_6196925_6196788_ENSG00000116254.13	0.0495759	0.211589	64	0.10003
CHD5_3p_chr1_6196698_6196577_ENSG00000116254.13	-0.00382669	0.106149	65	0.10003
CHD5_3p_chr1_6195463_6195290_ENSG00000116254.13	-0.0102318	0.118805	81	0.10003
CHD5_3p_chr1_6194919_6194778_ENSG00000116254.13	0.00263123	0.104748	81	0.10003
CHD5_3p_chr1_6194319_6194188_ENSG00000116254.13	0.009634	0.118127	82	0.10003
CHD5_3p_chr1_6191808_6191691_ENSG00000116254.13	-0.00369596	0.10616	71	0.10003
CHD5_3p_chr1_6189129_6188898_ENSG00000116254.13	-0.0108535	0.12224	86	0.10003
CHD5_3p_chr1_6188669_6188559_ENSG00000116254.13	0.036479	0.194468	98	0.10003
CHD5_3p_chr1_6188278_6188106_ENSG00000116254.13	-0.0560006	0.247673	86	0.10003
CHD5_3p_chr1_6187224_6187143_ENSG00000116254.13	0.190625	0.855305	86	0.144288
CHD5_3p_chr1_6186806_6186632_ENSG00000116254.13	-0.0344772	0.183834	92	0.10003
CHD5_3p_chr1_6185918_6185826_ENSG00000116254.13	0.00112204	0.102243	105	0.10003
CHD5_3p_chr1_6185672_6185584_ENSG00000116254.13	0.0458672	0.210478	89	0.10003
CHD5_3p_chr1_6185293_6185160_ENSG00000116254.13	-0.0916334	0.342584	66	0.10003
CHD5_3p_chr1_6184721_6184577_ENSG00000116254.13	-0.0322308	0.167224	79	0.10003
CHD5_3p_chr1_6184167_6184008_ENSG00000116254.13	-0.0895649	0.395333	93	0.101059
CHD5_3p_chr1_6181633_6181554_ENSG00000116254.13	-0.0494892	0.227023	89	0.10003
CHD5_3p_chr1_6181297_6181165_ENSG00000116254.13	0.00420122	0.107634	89	0.10003
CHD5_3p_chr1_6173476_6173371_ENSG00000116254.13	0.0224859	0.146625	84	0.10003
CHD5_3p_chr1_6173058_6172969_ENSG00000116254.13	-0.0248453	0.156411	96	0.10003
CHD5_3p_chr1_6172337_6172200_ENSG00000116254.13	0.0294901	0.166822	90	0.10003
CHD5_3p_chr1_6171943_6171835_ENSG00000116254.13	0.011056	0.121099	91	0.10003
CHD5_3p_chr1_6170586_6170454_ENSG00000116254.13	0.0141006	0.129386	86	0.10003
CHD5_3p_chr1_6170050_6169855_ENSG00000116254.13	-0.0498005	0.234838	86	0.10003
CHD5_3p_chr1_6166839_6166676_ENSG00000116254.13	-0.0323976	0.170146	82	0.10003
CHD5_3p_chr1_6166569_6166455_ENSG00000116254.13	0.0369506	0.179698	87	0.10003
CHD5_3p_chr1_6166347_6166294_ENSG00000116254.13	0.0227725	0.146071	84	0.10003
RPL22_3p_chr1_6268799_6268741_ENSG00000116251.5	0.126982	0.729013	238	0.119015
RPL22_3p_chr1_6263554_6263427_ENSG00000116251.5	-0.0557725	0.252401	136	0.10003
RPL22_3p_chr1_6260902_6260549_ENSG00000116251.5	0.0062314	0.115248	183	0.10003
RPL22_3p_chr1_6259672_6259622_ENSG00000116251.5	-0.0288695	0.245294	328	0.10003
RP1-120G22.11_3p_chr1_6265840_6265814_ENSG00000226944.1	-0.20836	0.923463	171	0.178957
RP1-120G22.11_3p_chr1_6265473_6265266_ENSG00000226944.1	0.0238852	0.156562	141	0.10003
RNF207_5p_chr1_6266596_6266786_ENSG00000158286.8	-0.11051	0.692737	263	0.115185
RNF207_5p_chr1_6267439_6267571_ENSG00000158286.8	-0.104608	0.658178	258	0.112439
RNF207_5p_chr1_6268941_6269085_ENSG00000158286.8	-0.136282	0.781922	237	0.126248
RNF207_5p_chr1_6269175_6269194_ENSG00000158286.8	-0.0875307	0.568683	272	0.107458
RNF207_5p_chr1_6269474_6269599_ENSG00000158286.8	-0.017627	0.162254	256	0.10003
RNF207_5p_chr1_6269984_6270030_ENSG00000158286.8	-0.0173005	0.162976	268	0.10003
RNF207_5p_chr1_6270283_6270355_ENSG00000158286.8	-0.0167334	0.159626	258	0.10003
RNF207_5p_chr1_6270430_6270498_ENSG00000158286.8	-0.00307476	0.109145	265	0.10003
RNF207_5p_chr1_6270930_6270998_ENSG00000158286.8	-0.0389125	0.263933	228	0.10003
RNF207_5p_chr1_6271081_6271178_ENSG00000158286.8	-0.0448459	0.309799	246	0.10003
RNF207_5p_chr1_6271927_6272113_ENSG00000158286.8	-0.0500662	0.335323	243	0.10003
RNF207_5p_chr1_6272291_6272476_ENSG00000158286.8	-0.00242034	0.107335	281	0.10003
RNF207_5p_chr1_6272742_6272793_ENSG00000158286.8	-0.0502154	0.36441	261	0.100281
RNF207_5p_chr1_6273126_6273243_ENSG00000158286.8	-0.0152179	0.153546	257	0.10003
RNF207_5p_chr1_6278349_6278429_ENSG00000158286.8	-0.0494319	0.36308	273	0.100234
RNF207_5p_chr1_6279296_6281252_ENSG00000158286.8	-0.0207038	0.180215	272	0.10003
ICMT_3p_chr1_6296032_6295777_ENSG00000116237.11	0.00618173	0.122857	328	0.10003
ICMT_3p_chr1_6295034_6294946_ENSG00000116237.11	0.0120612	0.149218	328	0.10003
ICMT_3p_chr1_6294571_6294465_ENSG00000116237.11	-0.106744	0.863669	328	0.147146
ICMT_3p_chr1_6293703_6293534_ENSG00000116237.11	0.0808997	0.709149	328	0.116985
ICMT_3p_chr1_6292179_6291962_ENSG00000116237.11	0.0293081	0.255023	328	0.10003
LINC00337_5p_chr1_6297026_6297210_ENSG00000225077.2	0.0588185	0.225351	79	0.10003
LINC00337_5p_chr1_6297305_6297405_ENSG00000225077.2	0.0841607	0.39499	114	0.101047
LINC00337_5p_chr1_6298281_6299504_ENSG00000225077.2	0.0395257	0.201891	114	0.10003
GPR153_3p_chr1_6321035_6320885_ENSG00000158292.6	-0.0704817	0.402482	163	0.101337
GPR153_3p_chr1_6315074_6314610_ENSG00000158292.6	-0.0256249	0.210355	280	0.10003
GPR153_3p_chr1_6314207_6313778_ENSG00000158292.6	-0.00600747	0.118273	250	0.10003
GPR153_3p_chr1_6311590_6311398_ENSG00000158292.6	0.00824862	0.128159	287	0.10003
GPR153_3p_chr1_6310684_6310500_ENSG00000158292.6	-0.01285	0.130613	150	0.10003
ACOT7_3p_chr1_6445873_6445554_ENSG00000097021.15	-0.00894802	0.127585	328	0.10003
ACOT7_3p_chr1_6420767_6420630_ENSG00000097021.15	0.0354328	0.287047	328	0.10003
ACOT7_3p_chr1_6419404_6418886_ENSG00000097021.15	-0.00809816	0.127585	328	0.10003
ACOT7_3p_chr1_6412309_6412285_ENSG00000097021.15	-0.0596933	0.511543	328	0.105272
ACOT7_3p_chr1_6399649_6399493_ENSG00000097021.15	0.018441	0.181712	328	0.10003
HES2_3p_chr1_6479979_6479836_ENSG00000069812.7	-0.118507	0.565095	101	0.107256
HES2_3p_chr1_6479762_6479667_ENSG00000069812.7	-0.0501262	0.228859	100	0.10003
ESPN_5p_chr1_6488286_6488479_ENSG00000187017.10	-0.242109	0.852719	73	0.143411
ESPN_5p_chr1_6500314_6500500_ENSG00000187017.10	-0.163953	0.733325	95	0.119444
ESPN_5p_chr1_6500686_6500868_ENSG00000187017.10	-0.18523	0.69945	85	0.115929
ESPN_5p_chr1_6500994_6501125_ENSG00000187017.10	-0.133358	0.56578	92	0.107284
ESPN_5p_chr1_6504541_6504742_ENSG00000187017.10	-0.082346	0.395585	108	0.101081
ESPN_5p_chr1_6508701_6509151_ENSG00000187017.10	0.00291758	0.105428	120	0.10003
ESPN_5p_chr1_6511663_6511808_ENSG00000187017.10	0.0068675	0.115894	141	0.10003
ESPN_5p_chr1_6511893_6512156_ENSG00000187017.10	-0.0341272	0.212121	160	0.10003
ESPN_5p_chr1_6517244_6517323_ENSG00000187017.10	0.0233895	0.165944	158	0.10003
ESPN_5p_chr1_6517421_6517432_ENSG00000187017.10	-0.0390547	0.238365	165	0.10003
ESPN_5p_chr1_6520059_6521040_ENSG00000187017.10	-0.0569796	0.328036	168	0.10003
TNFRSF25_3p_chr1_6526151_6526129_ENSG00000215788.5	-0.112025	0.569469	123	0.107532
TNFRSF25_3p_chr1_6525690_6525500_ENSG00000215788.5	-0.0892261	0.660086	247	0.112495
TNFRSF25_3p_chr1_6525282_6525148_ENSG00000215788.5	-0.069197	0.503764	263	0.104843
TNFRSF25_3p_chr1_6524779_6524612_ENSG00000215788.5	-0.0456224	0.316697	279	0.10003
TNFRSF25_3p_chr1_6524513_6524435_ENSG00000215788.5	-0.10711	0.80369	252	0.130711
TNFRSF25_3p_chr1_6523207_6522923_ENSG00000215788.5	-0.049384	0.378143	284	0.100484
TNFRSF25_3p_chr1_6522726_6522689_ENSG00000215788.5	-0.0220183	0.18566	292	0.10003
TNFRSF25_3p_chr1_6522234_6522054_ENSG00000215788.5	-0.0304451	0.236229	291	0.10003
PLEKHG5_3p_chr1_6557484_6557380_ENSG00000171680.16	0.00804199	0.111728	76	0.10003
PLEKHG5_3p_chr1_6557156_6557019_ENSG00000171680.16	0.055456	0.191927	76	0.10003
PLEKHG5_3p_chr1_6556756_6556553_ENSG00000171680.16	0.0151128	0.142473	166	0.10003
PLEKHG5_3p_chr1_6551760_6551697_ENSG00000171680.16	0.00777475	0.122281	211	0.10003
PLEKHG5_3p_chr1_6550640_6550505_ENSG00000171680.16	-0.00565874	0.115668	258	0.10003
PLEKHG5_3p_chr1_6546014_6545896_ENSG00000171680.16	-0.0891084	0.697762	264	0.115733
PLEKHG5_3p_chr1_6545529_6545384_ENSG00000171680.16	-0.145676	0.955859	266	0.211409
PLEKHG5_3p_chr1_6537718_6537589_ENSG00000171680.16	-0.0322902	0.251549	271	0.10003
PLEKHG5_3p_chr1_6536096_6535991_ENSG00000171680.16	-0.0403691	0.302611	295	0.10003
PLEKHG5_3p_chr1_6535582_6535522_ENSG00000171680.16	-0.0517202	0.37925	304	0.100491
PLEKHG5_3p_chr1_6535198_6535107_ENSG00000171680.16	-0.0476034	0.377904	299	0.100472
PLEKHG5_3p_chr1_6534647_6534511_ENSG00000171680.16	-0.00468659	0.115381	282	0.10003
PLEKHG5_3p_chr1_6534224_6534073_ENSG00000171680.16	-0.0156755	0.160671	281	0.10003
PLEKHG5_3p_chr1_6533514_6533311_ENSG00000171680.16	-0.0249328	0.205449	274	0.10003
PLEKHG5_3p_chr1_6533234_6533046_ENSG00000171680.16	-0.0143684	0.15566	285	0.10003
PLEKHG5_3p_chr1_6532682_6532587_ENSG00000171680.16	-0.0169315	0.169346	296	0.10003
PLEKHG5_3p_chr1_6531868_6531818_ENSG00000171680.16	-0.0434783	0.346018	292	0.10003
PLEKHG5_3p_chr1_6531697_6531548_ENSG00000171680.16	-0.0550302	0.453478	304	0.102631
PLEKHG5_3p_chr1_6531160_6531050_ENSG00000171680.16	-0.0432524	0.346077	296	0.10003
PLEKHG5_3p_chr1_6530944_6530795_ENSG00000171680.16	-0.0349704	0.285847	300	0.10003
PLEKHG5_3p_chr1_6530703_6530566_ENSG00000171680.16	-0.0429199	0.347492	300	0.10003
PLEKHG5_3p_chr1_6530415_6530296_ENSG00000171680.16	-0.060411	0.51024	313	0.105148
PLEKHG5_3p_chr1_6529736_6529604_ENSG00000171680.16	-0.0562775	0.4672	301	0.103344
PLEKHG5_3p_chr1_6529510_6529395_ENSG00000171680.16	-0.069008	0.593104	314	0.108695
PLEKHG5_3p_chr1_6529301_6529102_ENSG00000171680.16	-0.0504174	0.411384	291	0.10144
PLEKHG5_3p_chr1_6528646_6527885_ENSG00000171680.16	-0.101913	0.833635	296	0.137271
NOL9_3p_chr1_6614595_6614167_ENSG00000162408.10	-0.00967296	0.13439	313	0.10003
NOL9_3p_chr1_6610675_6610456_ENSG00000162408.10	-0.0459149	0.377246	328	0.100449
NOL9_3p_chr1_6609758_6609631_ENSG00000162408.10	0.0335292	0.277009	327	0.10003
NOL9_3p_chr1_6605240_6605105_ENSG00000162408.10	0.0685221	0.594133	328	0.108695
NOL9_3p_chr1_6604982_6604886_ENSG00000162408.10	0.0703936	0.614418	326	0.1098
NOL9_3p_chr1_6601987_6601890_ENSG00000162408.10	0.0837321	0.728816	328	0.118972
NOL9_3p_chr1_6593501_6593340_ENSG00000162408.10	-0.0458032	0.377095	324	0.100449
NOL9_3p_chr1_6592820_6592523_ENSG00000162408.10	-0.0403484	0.325234	323	0.10003
NOL9_3p_chr1_6592139_6592028_ENSG00000162408.10	-0.0353311	0.287088	325	0.10003
NOL9_3p_chr1_6589231_6589054_ENSG00000162408.10	-0.00349629	0.11186	328	0.10003
NOL9_3p_chr1_6586889_6586756_ENSG00000162408.10	-0.0459288	0.370696	327	0.100301
ZBTB48_5p_chr1_6640601_6641359_ENSG00000204859.7	0.0194019	0.185118	325	0.10003
ZBTB48_5p_chr1_6642118_6642359_ENSG00000204859.7	0.00912531	0.133752	325	0.10003
ZBTB48_5p_chr1_6645979_6646090_ENSG00000204859.7	0.0203907	0.191612	322	0.10003
ZBTB48_5p_chr1_6646755_6646847_ENSG00000204859.7	0.0359828	0.298433	327	0.10003
ZBTB48_5p_chr1_6647265_6647351_ENSG00000204859.7	0.0573923	0.468986	328	0.103374
ZBTB48_5p_chr1_6647538_6647692_ENSG00000204859.7	0.0613557	0.480282	326	0.103757
ZBTB48_5p_chr1_6648120_6648256_ENSG00000204859.7	0.00425674	0.114568	327	0.10003
ZBTB48_5p_chr1_6648338_6648502_ENSG00000204859.7	-0.0130209	0.150679	328	0.10003
ZBTB48_5p_chr1_6648816_6648904_ENSG00000204859.7	-0.0183833	0.178097	328	0.10003
ZBTB48_5p_chr1_6648976_6649340_ENSG00000204859.7	0.0208105	0.191346	324	0.10003
KLHL21_3p_chr1_6663061_6661857_ENSG00000162413.12	0.00319998	0.110912	328	0.10003
KLHL21_3p_chr1_6659512_6659107_ENSG00000162413.12	-0.0315343	0.258027	328	0.10003
PHF13_5p_chr1_6676817_6676918_ENSG00000116273.5	-0.00829328	0.129816	326	0.10003
PHF13_5p_chr1_6679863_6680397_ENSG00000116273.5	0.00372098	0.112644	328	0.10003
PHF13_5p_chr1_6681471_6684093_ENSG00000116273.5	-0.0216808	0.195634	327	0.10003
THAP3_5p_chr1_6685210_6685352_ENSG00000041988.11	0.0469941	0.208534	101	0.10003
THAP3_5p_chr1_6689703_6689784_ENSG00000041988.11	-0.226004	0.999666	328	0.760304
THAP3_5p_chr1_6690348_6690413_ENSG00000041988.11	-0.0673655	0.582227	328	0.108401
THAP3_5p_chr1_6694080_6694227_ENSG00000041988.11	0.0467812	0.200376	89	0.10003
DNAJC11_3p_chr1_6738527_6738454_ENSG00000007923.11	0.0671886	0.577012	328	0.108101
DNAJC11_3p_chr1_6713011_6712889_ENSG00000007923.11	0.0558079	0.479033	328	0.103723
DNAJC11_3p_chr1_6711662_6711589_ENSG00000007923.11	-0.0707279	0.618588	328	0.110081
DNAJC11_3p_chr1_6705186_6705101_ENSG00000007923.11	0.0113449	0.14484	328	0.10003
DNAJC11_3p_chr1_6700117_6699962_ENSG00000007923.11	-0.051141	0.433278	328	0.102038
CAMTA1_5p_chr1_6880241_6880310_ENSG00000171735.14	-0.0350307	0.273906	328	0.10003
CAMTA1_5p_chr1_6931817_6932113_ENSG00000171735.14	-0.158743	0.989555	328	0.308274
CAMTA1_5p_chr1_6946300_6946406_ENSG00000171735.14	0.0557928	0.461415	328	0.103031
CAMTA1_5p_chr1_6947714_6948261_ENSG00000171735.14	-0.117181	0.913851	328	0.171383
CAMTA1_5p_chr1_7151364_7151431_ENSG00000171735.14	-0.087407	0.249948	51	0.10003
CAMTA1_5p_chr1_7309551_7309686_ENSG00000171735.14	0.0265067	0.146999	65	0.10003
CAMTA1_5p_chr1_7792508_7792659_ENSG00000171735.14	0.216639	0.931996	104	0.185376
CAMTA1_5p_chr1_7796404_7796600_ENSG00000171735.14	0.0916513	0.462334	113	0.103038
CAMTA1_5p_chr1_7796991_7797069_ENSG00000171735.14	0.0832549	0.488026	151	0.10418
CAMTA1_5p_chr1_7797315_7797630_ENSG00000171735.14	0.0977316	0.510505	129	0.105191
CAMTA1_5p_chr1_7798019_7798542_ENSG00000171735.14	-0.140596	0.745576	135	0.121068
CAMTA1_5p_chr1_7804895_7805082_ENSG00000171735.14	0.0269506	0.174286	166	0.10003
CAMTA1_5p_chr1_7805905_7806151_ENSG00000171735.14	0.100428	0.54618	137	0.106515
CAMTA1_5p_chr1_7807770_7807841_ENSG00000171735.14	0.100175	0.467641	110	0.103374
CAMTA1_5p_chr1_7809831_7809851_ENSG00000171735.14	-0.0536895	0.195377	93	0.10003
CAMTA1_5p_chr1_7811259_7811452_ENSG00000171735.14	0.104547	0.462056	94	0.103038
CAMTA1_5p_chr1_7812519_7812593_ENSG00000171735.14	-0.0178888	0.14093	131	0.10003
CAMTA1_5p_chr1_7815698_7815728_ENSG00000171735.14	-0.0860235	0.449739	129	0.102599
CAMTA1_5p_chr1_7826519_7829766_ENSG00000171735.14	0.0387418	0.212109	124	0.10003
VAMP3_5p_chr1_7833502_7833571_ENSG00000049245.8	-0.0755396	0.650896	328	0.112236
VAMP3_5p_chr1_7837220_7837378_ENSG00000049245.8	-0.104288	0.864093	328	0.147483
VAMP3_5p_chr1_7838178_7838229_ENSG00000049245.8	-0.11115	0.904513	328	0.167047
VAMP3_5p_chr1_7839686_7841492_ENSG00000049245.8	-0.0154706	0.164352	328	0.10003
PER3_5p_chr1_7844714_7845065_ENSG00000049246.10	-0.103047	0.747882	220	0.121343
PER3_5p_chr1_7845501_7845646_ENSG00000049246.10	-0.0358165	0.285113	296	0.10003
PER3_5p_chr1_7846781_7846896_ENSG00000049246.10	-0.0470226	0.371203	290	0.100304
PER3_5p_chr1_7848105_7848306_ENSG00000049246.10	-0.0609601	0.483906	281	0.103883
PER3_5p_chr1_7854017_7854068_ENSG00000049246.10	-0.0675439	0.542386	279	0.106405
PER3_5p_chr1_7858585_7858733_ENSG00000049246.10	-0.0796383	0.65047	286	0.112215
PER3_5p_chr1_7861173_7861251_ENSG00000049246.10	-0.131757	0.893358	283	0.160056
PER3_5p_chr1_7863107_7863213_ENSG00000049246.10	-0.144481	0.917962	279	0.174821
PER3_5p_chr1_7863752_7864018_ENSG00000049246.10	-0.0354605	0.271744	271	0.10003
PER3_5p_chr1_7868953_7869058_ENSG00000049246.10	0.0769317	0.594372	265	0.108695
PER3_5p_chr1_7869953_7870081_ENSG00000049246.10	0.0159765	0.156005	259	0.10003
PER3_5p_chr1_7879345_7879480_ENSG00000049246.10	-0.10117	0.709188	264	0.116985
PER3_5p_chr1_7880175_7880299_ENSG00000049246.10	-0.0947027	0.680626	284	0.114197
PER3_5p_chr1_7880527_7880700_ENSG00000049246.10	-0.0719142	0.522549	273	0.105588
PER3_5p_chr1_7886540_7886770_ENSG00000049246.10	-0.110717	0.754291	284	0.122437
PER3_5p_chr1_7889894_7890221_ENSG00000049246.10	-0.0318957	0.251864	286	0.10003
PER3_5p_chr1_7895822_7896005_ENSG00000049246.10	0.0846034	0.70256	283	0.116333
PER3_5p_chr1_7897059_7897209_ENSG00000049246.10	0.0410133	0.315785	282	0.10003
PER3_5p_chr1_7902732_7903142_ENSG00000049246.10	-0.0313896	0.25055	281	0.10003
RP3-467L1.4_3p_chr1_7887177_7887164_ENSG00000236266.1	0.0641231	0.48017	271	0.103757
RP3-467L1.4_3p_chr1_7871664_7871549_ENSG00000236266.1	0.115192	0.738634	265	0.120318
UTS2_3p_chr1_7913572_7913367_ENSG00000049247.9	0.124166	0.256406	27	0.10003
UTS2_3p_chr1_7913178_7912961_ENSG00000049247.9	0.0869164	0.183983	37	0.10003
UTS2_3p_chr1_7910982_7910872_ENSG00000049247.9	-0.00916426	0.109037	36	0.10003
UTS2_3p_chr1_7909743_7909700_ENSG00000049247.9	0.147716	0.344497	35	0.10003
TNFRSF9_3p_chr1_8000926_8000844_ENSG00000049249.4	-0.119058	0.530062	91	0.105915
TNFRSF9_3p_chr1_8000138_7999955_ENSG00000049249.4	-0.244507	0.78878	69	0.127599
TNFRSF9_3p_chr1_7998888_7998781_ENSG00000049249.4	-0.217731	0.744708	74	0.120918
TNFRSF9_3p_chr1_7998390_7998253_ENSG00000049249.4	-0.089436	0.330723	79	0.10003
TNFRSF9_3p_chr1_7997816_7997750_ENSG00000049249.4	-0.115579	0.491713	79	0.104287
TNFRSF9_3p_chr1_7996623_7996520_ENSG00000049249.4	0.0921592	0.406265	79	0.101339
TNFRSF9_3p_chr1_7995203_7995073_ENSG00000049249.4	-0.153516	0.563629	73	0.107221
PARK7_5p_chr1_8022823_8022935_ENSG00000116288.8	0.0599479	0.517886	328	0.105418
PARK7_5p_chr1_8025384_8025485_ENSG00000116288.8	0.00509485	0.118348	328	0.10003
PARK7_5p_chr1_8029405_8029464_ENSG00000116288.8	0.0589343	0.509061	328	0.105096
PARK7_5p_chr1_8030954_8031023_ENSG00000116288.8	-0.0629464	0.548918	328	0.106732
PARK7_5p_chr1_8037712_8037798_ENSG00000116288.8	0.099894	0.843912	328	0.140867
ERRFI1_3p_chr1_8086368_8086218_ENSG00000116285.8	-0.0666534	0.560946	315	0.107029
ERRFI1_3p_chr1_8075752_8075555_ENSG00000116285.8	-0.101674	0.831061	323	0.13675
SLC45A1_5p_chr1_8384366_8384786_ENSG00000162426.10	-0.114267	0.428949	76	0.101967
SLC45A1_5p_chr1_8385358_8385450_ENSG00000162426.10	0.00834552	0.113386	80	0.10003
SLC45A1_5p_chr1_8385878_8386102_ENSG00000162426.10	-0.00165809	0.102321	88	0.10003
SLC45A1_5p_chr1_8390269_8390996_ENSG00000162426.10	-0.0214082	0.136065	84	0.10003
SLC45A1_5p_chr1_8395497_8395650_ENSG00000162426.10	-0.0492358	0.209786	90	0.10003
SLC45A1_5p_chr1_8396139_8396169_ENSG00000162426.10	-0.0215768	0.145749	92	0.10003
SLC45A1_5p_chr1_8397876_8398052_ENSG00000162426.10	-0.0465943	0.203391	91	0.10003
SLC45A1_5p_chr1_8399553_8399758_ENSG00000162426.10	-0.0796414	0.361125	105	0.100211
SLC45A1_5p_chr1_8403807_8404227_ENSG00000162426.10	-0.0716698	0.290041	87	0.10003
RERE_3p_chr1_8877702_8877219_ENSG00000142599.13	-0.0115453	0.129719	189	0.10003
RERE_3p_chr1_8852647_8852463_ENSG00000142599.13	-0.0371833	0.24559	207	0.10003
RERE_3p_chr1_8763278_8763114_ENSG00000142599.13	0.0359339	0.258184	304	0.10003
RERE_3p_chr1_8716500_8716032_ENSG00000142599.13	0.0464246	0.385858	328	0.100797
RERE_3p_chr1_8684439_8684369_ENSG00000142599.13	0.0454347	0.375521	328	0.100426
RERE_3p_chr1_8674745_8674620_ENSG00000142599.13	-0.0609371	0.519728	327	0.105528
RERE_3p_chr1_8617582_8617477_ENSG00000142599.13	0.0213257	0.195589	326	0.10003
RERE_3p_chr1_8616630_8616534_ENSG00000142599.13	0.0391173	0.32243	326	0.10003
RERE_3p_chr1_8601377_8601273_ENSG00000142599.13	0.0544062	0.456309	325	0.102697
RERE_3p_chr1_8586098_8585818_ENSG00000142599.13	-0.109451	0.834675	328	0.13771
RERE_3p_chr1_8568734_8568686_ENSG00000142599.13	0.0462785	0.385959	328	0.100797
RERE_3p_chr1_8557589_8557465_ENSG00000142599.13	0.053128	0.445397	327	0.102392
RERE_3p_chr1_8555222_8555123_ENSG00000142599.13	0.050143	0.418649	328	0.101808
RERE_3p_chr1_8526083_8525985_ENSG00000142599.13	0.0153894	0.164121	328	0.10003
RERE_3p_chr1_8485272_8484848_ENSG00000142599.13	-0.0729082	0.637919	325	0.111385
RERE_3p_chr1_8484294_8484075_ENSG00000142599.13	-0.0377383	0.279541	326	0.10003
RERE_3p_chr1_8483726_8483621_ENSG00000142599.13	-0.114552	0.854816	326	0.144195
RERE_3p_chr1_8483479_8483227_ENSG00000142599.13	-0.0250897	0.211299	326	0.10003
RERE_3p_chr1_8482867_8482787_ENSG00000142599.13	0.0153378	0.162219	325	0.10003
RERE_3p_chr1_8426034_8425872_ENSG00000142599.13	-0.0339571	0.279737	326	0.10003
RERE_3p_chr1_8424898_8424806_ENSG00000142599.13	-0.0373328	0.308042	327	0.10003
RERE_3p_chr1_8422904_8422743_ENSG00000142599.13	-0.038446	0.315097	328	0.10003
RERE_3p_chr1_8421936_8421823_ENSG00000142599.13	-0.0351927	0.285814	328	0.10003
RERE_3p_chr1_8421550_8420172_ENSG00000142599.13	-0.0463157	0.385341	328	0.100784
RERE_3p_chr1_8420046_8419824_ENSG00000142599.13	-0.0188575	0.181676	328	0.10003
RERE_3p_chr1_8418976_8418256_ENSG00000142599.13	-0.0340336	0.282817	328	0.10003
RERE_3p_chr1_8416306_8416160_ENSG00000142599.13	-0.0270769	0.233536	328	0.10003
RERE_3p_chr1_8415659_8415479_ENSG00000142599.13	-0.0569587	0.484219	328	0.103907
RP5-1115A15.1_5p_chr1_8488542_8488648_ENSG00000232912.1	-0.153622	0.982668	325	0.270577
RP5-1115A15.1_5p_chr1_8489887_8490101_ENSG00000232912.1	-0.116031	0.9149	326	0.172576
ENO1_3p_chr1_8934976_8934883_ENSG00000074800.9	-0.0210426	0.196163	328	0.10003
ENO1_3p_chr1_8932045_8931950_ENSG00000074800.9	-0.00115598	0.103912	328	0.10003
ENO1_3p_chr1_8930569_8930511_ENSG00000074800.9	0.0666048	0.589494	328	0.108525
ENO1_3p_chr1_8928116_8928047_ENSG00000074800.9	0.0903745	0.790631	328	0.127871
ENO1_3p_chr1_8927309_8927176_ENSG00000074800.9	0.0658494	0.576057	328	0.10806
ENO1_3p_chr1_8926560_8926338_ENSG00000074800.9	0.0999402	0.843875	328	0.140867
ENO1_3p_chr1_8925541_8925344_ENSG00000074800.9	0.0310844	0.26242	328	0.10003
ENO1_3p_chr1_8924151_8923950_ENSG00000074800.9	0.0934954	0.796211	328	0.129134
ENO1-AS1_5p_chr1_8939624_8939953_ENSG00000230679.1	-0.0955009	0.350062	79	0.10003
SLC2A5_3p_chr1_9145225_9145073_ENSG00000142583.13	-0.285993	0.742345	32	0.120665
SLC2A5_3p_chr1_9133181_9133135_ENSG00000142583.13	-0.0919992	0.235302	32	0.10003
SLC2A5_3p_chr1_9132444_9132363_ENSG00000142583.13	-0.0252283	0.123575	33	0.10003
SLC2A5_3p_chr1_9129910_9129563_ENSG00000142583.13	-0.00499514	0.106982	48	0.10003
SLC2A5_3p_chr1_9118309_9118211_ENSG00000142583.13	0.0395758	0.170111	51	0.10003
SLC2A5_3p_chr1_9117667_9117507_ENSG00000142583.13	0.051117	0.194556	41	0.10003
SLC2A5_3p_chr1_9109319_9109159_ENSG00000142583.13	0.094011	0.329948	41	0.10003
SLC2A5_3p_chr1_9107793_9107669_ENSG00000142583.13	-0.0191729	0.126189	42	0.10003
SLC2A5_3p_chr1_9101996_9100123_ENSG00000142583.13	0.0397254	0.165351	45	0.10003
SLC2A5_3p_chr1_9100046_9099859_ENSG00000142583.13	-0.0255444	0.135227	34	0.10003
SLC2A5_3p_chr1_9099721_9099611_ENSG00000142583.13	-0.0259481	0.136935	43	0.10003
SLC2A5_3p_chr1_9098988_9098887_ENSG00000142583.13	-0.115938	0.462045	55	0.103038
SLC2A5_3p_chr1_9098565_9098490_ENSG00000142583.13	-0.0291526	0.15031	53	0.10003
SLC2A5_3p_chr1_9098083_9097956_ENSG00000142583.13	-0.05522	0.212858	54	0.10003
GPR157_3p_chr1_9189229_9188704_ENSG00000180758.10	0.137817	0.908577	232	0.16872
GPR157_3p_chr1_9171548_9171335_ENSG00000180758.10	0.0909458	0.762015	299	0.12305
GPR157_3p_chr1_9165739_9165545_ENSG00000180758.10	0.0718089	0.5859	295	0.108459
RP3-510D11.2_5p_chr1_9251452_9252148_ENSG00000234546.2	0.0172218	0.136385	96	0.10003
H6PD_5p_chr1_9304984_9305620_ENSG00000049239.8	0.0535062	0.391454	249	0.100977
H6PD_5p_chr1_9307025_9307142_ENSG00000049239.8	0.0767035	0.66634	317	0.112964
H6PD_5p_chr1_9322118_9322387_ENSG00000049239.8	0.102994	0.857812	319	0.14555
H6PD_5p_chr1_9323568_9331396_ENSG00000049239.8	0.0651647	0.554618	317	0.106894
SPSB1_5p_chr1_9427507_9429591_ENSG00000171621.9	-0.04923	0.410903	312	0.10144
SLC25A33_5p_chr1_9613684_9613863_ENSG00000171612.6	0.00258902	0.108606	323	0.10003
SLC25A33_5p_chr1_9627342_9627419_ENSG00000171612.6	-0.0308543	0.253583	326	0.10003
SLC25A33_5p_chr1_9630316_9630416_ENSG00000171612.6	0.0523534	0.424657	325	0.101871
SLC25A33_5p_chr1_9633404_9633470_ENSG00000171612.6	0.0128041	0.150621	326	0.10003
SLC25A33_5p_chr1_9640012_9640292_ENSG00000171612.6	-0.0339423	0.275153	326	0.10003
SLC25A33_5p_chr1_9642357_9645237_ENSG00000171612.6	-0.01462	0.158491	326	0.10003
TMEM201_5p_chr1_9655948_9656068_ENSG00000188807.8	-0.0310017	0.257533	313	0.10003
TMEM201_5p_chr1_9656917_9657111_ENSG00000188807.8	-0.0234337	0.209917	319	0.10003
TMEM201_5p_chr1_9658507_9658683_ENSG00000188807.8	-0.00552335	0.11959	325	0.10003
TMEM201_5p_chr1_9661163_9661512_ENSG00000188807.8	-0.00400289	0.113887	327	0.10003
TMEM201_5p_chr1_9662127_9665012_ENSG00000188807.8	0.00776514	0.128581	327	0.10003
TMEM201_5p_chr1_9667615_9667847_ENSG00000188807.8	-0.0202102	0.189606	322	0.10003
TMEM201_5p_chr1_9669898_9669969_ENSG00000188807.8	-0.0194539	0.185766	327	0.10003
TMEM201_5p_chr1_9670564_9670863_ENSG00000188807.8	-0.0604256	0.511711	318	0.10529
TMEM201_5p_chr1_9671073_9671131_ENSG00000188807.8	-0.0377707	0.316449	325	0.10003
TMEM201_5p_chr1_9671811_9671948_ENSG00000188807.8	-0.0127997	0.150757	325	0.10003
TMEM201_5p_chr1_9673044_9674935_ENSG00000188807.8	-0.0381654	0.31573	323	0.10003
PIK3CD_5p_chr1_9751525_9751629_ENSG00000171608.11	0.0426424	0.254941	173	0.10003
PIK3CD_5p_chr1_9751733_9752004_ENSG00000171608.11	-0.0769555	0.48142	193	0.103784
PIK3CD_5p_chr1_9770482_9770654_ENSG00000171608.11	0.061227	0.36394	184	0.10027
PIK3CD_5p_chr1_9775599_9775827_ENSG00000171608.11	-0.0221749	0.180682	229	0.10003
PIK3CD_5p_chr1_9775907_9776136_ENSG00000171608.11	0.0592344	0.391915	210	0.10101
PIK3CD_5p_chr1_9776498_9776677_ENSG00000171608.11	0.0208883	0.164953	197	0.10003
PIK3CD_5p_chr1_9777017_9777166_ENSG00000171608.11	0.102917	0.663122	193	0.112624
PIK3CD_5p_chr1_9777595_9777684_ENSG00000171608.11	0.0726385	0.478948	212	0.103723
PIK3CD_5p_chr1_9778752_9778973_ENSG00000171608.11	0.0370301	0.248429	214	0.10003
PIK3CD_5p_chr1_9779979_9780075_ENSG00000171608.11	0.00196872	0.105617	252	0.10003
PIK3CD_5p_chr1_9780170_9780300_ENSG00000171608.11	0.132364	0.870029	235	0.149653
PIK3CD_5p_chr1_9780492_9780719_ENSG00000171608.11	-0.0752031	0.507011	206	0.104993
PIK3CD_5p_chr1_9780800_9780967_ENSG00000171608.11	-0.00222089	0.106166	220	0.10003
PIK3CD_5p_chr1_9781185_9781306_ENSG00000171608.11	0.0749633	0.547761	237	0.106679
PIK3CD_5p_chr1_9781502_9781918_ENSG00000171608.11	0.0696629	0.468737	222	0.103374
PIK3CD_5p_chr1_9782033_9782211_ENSG00000171608.11	0.0581368	0.389838	217	0.10091
PIK3CD_5p_chr1_9782302_9782414_ENSG00000171608.11	0.0680904	0.459885	218	0.102863
PIK3CD_5p_chr1_9782586_9782664_ENSG00000171608.11	0.0786782	0.550547	226	0.106841
PIK3CD_5p_chr1_9783183_9783350_ENSG00000171608.11	0.0274282	0.206477	227	0.10003
PIK3CD_5p_chr1_9784027_9784150_ENSG00000171608.11	0.08477	0.575971	219	0.108048
PIK3CD_5p_chr1_9784334_9784479_ENSG00000171608.11	0.0859587	0.620043	236	0.110162
PIK3CD_5p_chr1_9784862_9784994_ENSG00000171608.11	0.0890376	0.620406	222	0.110194
PIK3CD_5p_chr1_9786967_9789083_ENSG00000171608.11	0.00950555	0.128866	228	0.10003
C1orf200_3p_chr1_9714644_9714256_ENSG00000179840.5	0.320634	0.714316	53	0.117578
RP11-558F24.4_3p_chr1_9747613_9747393_ENSG00000231789.2	0.172395	0.948038	220	0.200953
RP11-558F24.4_3p_chr1_9741193_9740770_ENSG00000231789.2	0.0520263	0.231399	99	0.10003
CLSTN1_3p_chr1_9884584_9883701_ENSG00000171603.12	0.0511988	0.431129	326	0.101976
CLSTN1_3p_chr1_9833452_9833330_ENSG00000171603.12	-0.000929605	0.103059	328	0.10003
CLSTN1_3p_chr1_9816568_9816539_ENSG00000171603.12	0.118798	0.75048	328	0.121648
CLSTN1_3p_chr1_9815367_9815172_ENSG00000171603.12	0.0721452	0.581395	328	0.10837
CLSTN1_3p_chr1_9810225_9809822_ENSG00000171603.12	0.00350267	0.112014	328	0.10003
CLSTN1_3p_chr1_9801314_9801152_ENSG00000171603.12	-0.00643712	0.123505	328	0.10003
CLSTN1_3p_chr1_9797612_9797556_ENSG00000171603.12	0.187073	0.971291	328	0.234683
CLSTN1_3p_chr1_9796100_9795943_ENSG00000171603.12	0.00701114	0.125639	328	0.10003
CLSTN1_3p_chr1_9794200_9794030_ENSG00000171603.12	0.0219176	0.197065	328	0.10003
CLSTN1_3p_chr1_9793604_9793459_ENSG00000171603.12	0.0159872	0.167962	328	0.10003
CTNNBIP1_3p_chr1_9970394_9970153_ENSG00000178585.10	-0.031228	0.258906	310	0.10003
CTNNBIP1_3p_chr1_9953295_9953067_ENSG00000178585.10	0.0480875	0.392191	318	0.101036
CTNNBIP1_3p_chr1_9943796_9943763_ENSG00000178585.10	-0.0374542	0.305185	319	0.10003
CTNNBIP1_3p_chr1_9938234_9938198_ENSG00000178585.10	-0.0987272	0.791803	319	0.128155
CTNNBIP1_3p_chr1_9938047_9937963_ENSG00000178585.10	0.00514774	0.118169	326	0.10003
CTNNBIP1_3p_chr1_9932150_9932027_ENSG00000178585.10	-0.0211182	0.196455	327	0.10003
CTNNBIP1_3p_chr1_9931335_9931245_ENSG00000178585.10	-0.0302338	0.256155	327	0.10003
LZIC_3p_chr1_10003465_10003407_ENSG00000162441.7	0.0679668	0.563496	326	0.107219
LZIC_3p_chr1_10003387_10003307_ENSG00000162441.7	-0.105146	0.85009	328	0.142647
LZIC_3p_chr1_10002840_10002682_ENSG00000162441.7	-0.00354694	0.112372	328	0.10003
LZIC_3p_chr1_9996685_9996577_ENSG00000162441.7	0.0478041	0.402958	328	0.101337
LZIC_3p_chr1_9995685_9995550_ENSG00000162441.7	-0.0299999	0.257567	328	0.10003
LZIC_3p_chr1_9994918_9994820_ENSG00000162441.7	0.0668053	0.574139	328	0.1079
LZIC_3p_chr1_9992956_9992861_ENSG00000162441.7	0.0191774	0.183314	328	0.10003
LZIC_3p_chr1_9992030_9991949_ENSG00000162441.7	0.0175566	0.175289	328	0.10003
RP11-84A14.4_5p_chr1_10009696_10010032_ENSG00000228150.1	0.00585279	0.120579	327	0.10003
NMNAT1_5p_chr1_10032076_10032561_ENSG00000173614.9	-0.0164708	0.168806	327	0.10003
NMNAT1_5p_chr1_10035650_10035833_ENSG00000173614.9	0.0236841	0.20951	327	0.10003
NMNAT1_5p_chr1_10041089_10041228_ENSG00000173614.9	0.000711151	0.102291	324	0.10003
NMNAT1_5p_chr1_10041314_10041824_ENSG00000173614.9	-0.033635	0.277891	322	0.10003
NMNAT1_5p_chr1_10042359_10043198_ENSG00000173614.9	-0.0223429	0.199634	322	0.10003
RBP7_5p_chr1_10067628_10067806_ENSG00000162444.11	-0.061149	0.329505	179	0.10003
RBP7_5p_chr1_10068231_10068332_ENSG00000162444.11	-0.0960717	0.517673	175	0.105418
RBP7_5p_chr1_10075840_10076078_ENSG00000162444.11	-0.0692953	0.367439	163	0.100281
UBE4B_5p_chr1_10132086_10132272_ENSG00000130939.14	-0.00261893	0.109058	328	0.10003
UBE4B_5p_chr1_10132512_10133176_ENSG00000130939.14	-0.171914	0.9942	328	0.374681
UBE4B_5p_chr1_10155519_10155654_ENSG00000130939.14	0.00938479	0.135794	328	0.10003
UBE4B_5p_chr1_10161166_10161253_ENSG00000130939.14	0.0097005	0.137268	328	0.10003
UBE4B_5p_chr1_10163006_10163150_ENSG00000130939.14	0.00129524	0.104296	328	0.10003
UBE4B_5p_chr1_10165574_10165802_ENSG00000130939.14	0.0180441	0.179287	328	0.10003
UBE4B_5p_chr1_10166255_10166641_ENSG00000130939.14	-0.010142	0.13815	328	0.10003
UBE4B_5p_chr1_10177517_10177658_ENSG00000130939.14	0.0171276	0.174399	328	0.10003
UBE4B_5p_chr1_10179571_10179671_ENSG00000130939.14	0.0362789	0.304128	328	0.10003
UBE4B_5p_chr1_10182020_10182134_ENSG00000130939.14	0.0423265	0.35604	328	0.100071
UBE4B_5p_chr1_10186852_10186935_ENSG00000130939.14	0.000280619	0.100926	328	0.100026
UBE4B_5p_chr1_10189450_10189506_ENSG00000130939.14	0.0181096	0.179212	328	0.10003
UBE4B_5p_chr1_10190558_10190674_ENSG00000130939.14	0.03631	0.304344	328	0.10003
UBE4B_5p_chr1_10190773_10190871_ENSG00000130939.14	0.0193488	0.186123	328	0.10003
UBE4B_5p_chr1_10192427_10192540_ENSG00000130939.14	0.0243101	0.214848	328	0.10003
UBE4B_5p_chr1_10195046_10195244_ENSG00000130939.14	0.0228729	0.208142	328	0.10003
UBE4B_5p_chr1_10197125_10197263_ENSG00000130939.14	0.0173001	0.175385	328	0.10003
UBE4B_5p_chr1_10204998_10205097_ENSG00000130939.14	0.0107901	0.141769	328	0.10003
UBE4B_5p_chr1_10207021_10207148_ENSG00000130939.14	0.00462997	0.116459	328	0.10003
UBE4B_5p_chr1_10209242_10209340_ENSG00000130939.14	0.0265741	0.232297	328	0.10003
UBE4B_5p_chr1_10211384_10211619_ENSG00000130939.14	0.0375334	0.314068	328	0.10003
UBE4B_5p_chr1_10221200_10221344_ENSG00000130939.14	0.0131599	0.153401	328	0.10003
UBE4B_5p_chr1_10228194_10228328_ENSG00000130939.14	0.00197568	0.106635	328	0.10003
UBE4B_5p_chr1_10231196_10231387_ENSG00000130939.14	-0.00656422	0.12336	328	0.10003
UBE4B_5p_chr1_10238702_10238888_ENSG00000130939.14	-0.00126662	0.104131	328	0.10003
UBE4B_5p_chr1_10239474_10239620_ENSG00000130939.14	0.0110099	0.142934	328	0.10003
UBE4B_5p_chr1_10239953_10241297_ENSG00000130939.14	-0.0165737	0.170127	328	0.10003
KIF1B_5p_chr1_10292308_10292492_ENSG00000054523.12	0.0043251	0.113695	291	0.10003
KIF1B_5p_chr1_10316305_10316381_ENSG00000054523.12	-0.00742874	0.12698	326	0.10003
KIF1B_5p_chr1_10318551_10318730_ENSG00000054523.12	0.00368807	0.11255	325	0.10003
KIF1B_5p_chr1_10321963_10322028_ENSG00000054523.12	0.0216839	0.197801	327	0.10003
KIF1B_5p_chr1_10327438_10327616_ENSG00000054523.12	0.0180262	0.177142	327	0.10003
KIF1B_5p_chr1_10328210_10328321_ENSG00000054523.12	-0.00551814	0.119186	326	0.10003
KIF1B_5p_chr1_10331560_10331637_ENSG00000054523.12	0.0380224	0.316577	326	0.10003
KIF1B_5p_chr1_10332299_10332364_ENSG00000054523.12	0.0508688	0.426636	325	0.101927
KIF1B_5p_chr1_10333072_10333089_ENSG00000054523.12	-0.022771	0.194885	323	0.10003
KIF1B_5p_chr1_10335486_10335561_ENSG00000054523.12	0.0297046	0.247281	323	0.10003
KIF1B_5p_chr1_10336379_10336457_ENSG00000054523.12	0.0528263	0.443201	324	0.102346
KIF1B_5p_chr1_10338044_10338186_ENSG00000054523.12	0.0739942	0.649282	326	0.112133
KIF1B_5p_chr1_10339155_10339196_ENSG00000054523.12	0.00686285	0.122891	325	0.10003
KIF1B_5p_chr1_10342380_10342591_ENSG00000054523.12	-0.0243312	0.210664	325	0.10003
KIF1B_5p_chr1_10351140_10351219_ENSG00000054523.12	0.00252367	0.108381	325	0.10003
KIF1B_5p_chr1_10352105_10352180_ENSG00000054523.12	-0.00823326	0.129975	326	0.10003
KIF1B_5p_chr1_10355144_10355223_ENSG00000054523.12	0.0210738	0.193426	326	0.10003
KIF1B_5p_chr1_10355718_10355824_ENSG00000054523.12	0.0237223	0.209149	326	0.10003
KIF1B_5p_chr1_10356640_10356723_ENSG00000054523.12	0.022996	0.205619	326	0.10003
KIF1B_5p_chr1_10356955_10357135_ENSG00000054523.12	-0.00603907	0.121475	327	0.10003
KIF1B_5p_chr1_10357232_10357304_ENSG00000054523.12	-0.0122001	0.147214	325	0.10003
KIF1B_5p_chr1_10363221_10366522_ENSG00000054523.12	0.0502105	0.365061	326	0.100281
KIF1B_5p_chr1_10380101_10380194_ENSG00000054523.12	-0.0408125	0.325686	313	0.10003
KIF1B_5p_chr1_10381767_10381915_ENSG00000054523.12	-0.0479533	0.386351	319	0.100801
KIF1B_5p_chr1_10383942_10384120_ENSG00000054523.12	-0.0170528	0.169789	318	0.10003
KIF1B_5p_chr1_10384816_10384953_ENSG00000054523.12	-0.00456075	0.115828	324	0.10003
KIF1B_5p_chr1_10386169_10386417_ENSG00000054523.12	0.00486139	0.115768	323	0.10003
KIF1B_5p_chr1_10394578_10394696_ENSG00000054523.12	-0.0216549	0.195095	322	0.10003
KIF1B_5p_chr1_10396715_10396800_ENSG00000054523.12	-0.03087	0.256866	323	0.10003
KIF1B_5p_chr1_10397132_10397261_ENSG00000054523.12	-0.0335282	0.278159	324	0.10003
KIF1B_5p_chr1_10397429_10397591_ENSG00000054523.12	-0.00362213	0.112316	323	0.10003
KIF1B_5p_chr1_10399827_10399917_ENSG00000054523.12	-0.00668991	0.123782	323	0.10003
KIF1B_5p_chr1_10402108_10402226_ENSG00000054523.12	-0.0208904	0.191915	321	0.10003
KIF1B_5p_chr1_10403290_10403345_ENSG00000054523.12	-0.0383018	0.307402	314	0.10003
KIF1B_5p_chr1_10405903_10406011_ENSG00000054523.12	-0.027416	0.232805	321	0.10003
KIF1B_5p_chr1_10407819_10407885_ENSG00000054523.12	-0.019079	0.181232	318	0.10003
KIF1B_5p_chr1_10408707_10408791_ENSG00000054523.12	-0.0349758	0.287419	320	0.10003
KIF1B_5p_chr1_10412689_10412794_ENSG00000054523.12	-0.043077	0.353718	321	0.10003
KIF1B_5p_chr1_10420987_10421101_ENSG00000054523.12	-0.0280414	0.235918	321	0.10003
KIF1B_5p_chr1_10421750_10421883_ENSG00000054523.12	0.000119461	0.100384	324	0.100002
KIF1B_5p_chr1_10423341_10423402_ENSG00000054523.12	-0.00785841	0.128629	324	0.10003
KIF1B_5p_chr1_10425158_10425303_ENSG00000054523.12	-0.0304885	0.25388	322	0.10003
KIF1B_5p_chr1_10425467_10425706_ENSG00000054523.12	-0.0219613	0.19821	325	0.10003
KIF1B_5p_chr1_10428525_10428596_ENSG00000054523.12	0.0110007	0.142448	324	0.10003
KIF1B_5p_chr1_10431199_10431320_ENSG00000054523.12	0.00322265	0.110853	326	0.10003
KIF1B_5p_chr1_10434374_10434523_ENSG00000054523.12	-0.0169081	0.170231	325	0.10003
KIF1B_5p_chr1_10434912_10435104_ENSG00000054523.12	-0.0276711	0.234616	325	0.10003
KIF1B_5p_chr1_10435313_10435431_ENSG00000054523.12	-0.00534841	0.118803	324	0.10003
KIF1B_5p_chr1_10436603_10441661_ENSG00000054523.12	-0.00486419	0.116706	322	0.10003
PGD_5p_chr1_10463128_10463193_ENSG00000142657.16	-0.00797477	0.128258	328	0.10003
APITD1_5p_chr1_10493899_10494022_ENSG00000175279.17	-0.0233404	0.202202	328	0.10003
APITD1_5p_chr1_10494714_10494747_ENSG00000175279.17	-0.0123649	0.145751	328	0.10003
APITD1_5p_chr1_10500404_10500470_ENSG00000175279.17	-0.0269807	0.226282	328	0.10003
APITD1_5p_chr1_10502322_10502866_ENSG00000175279.17	-0.0230532	0.201538	328	0.10003
CORT_5p_chr1_10511434_10511959_ENSG00000241563.2	-0.0403219	0.327699	309	0.10003
DFFA_3p_chr1_10532583_10532380_ENSG00000160049.7	-0.0584279	0.483159	328	0.103883
DFFA_3p_chr1_10529395_10529234_ENSG00000160049.7	-0.0287791	0.24028	328	0.10003
DFFA_3p_chr1_10527389_10527247_ENSG00000160049.7	-0.0667035	0.566835	328	0.1073
DFFA_3p_chr1_10523677_10523488_ENSG00000160049.7	0.0229954	0.206152	328	0.10003
DFFA_3p_chr1_10519146_10518830_ENSG00000160049.7	-0.0357757	0.18213	101	0.10003
PEX14_5p_chr1_10555331_10555378_ENSG00000142655.8	-0.0742404	0.631881	328	0.110897
PEX14_5p_chr1_10596270_10596354_ENSG00000142655.8	-0.0624521	0.532612	328	0.10597
PEX14_5p_chr1_10659295_10659423_ENSG00000142655.8	-0.0361626	0.29668	328	0.10003
PEX14_5p_chr1_10678389_10678474_ENSG00000142655.8	-0.05618	0.478798	328	0.103723
PEX14_5p_chr1_10683076_10683343_ENSG00000142655.8	-0.0537229	0.447179	328	0.102449
PEX14_5p_chr1_10684397_10684494_ENSG00000142655.8	-0.0755729	0.639754	328	0.111505
PEX14_5p_chr1_10687329_10687420_ENSG00000142655.8	-0.0502563	0.417648	328	0.101772
PEX14_5p_chr1_10689588_10690815_ENSG00000142655.8	-0.0458707	0.377891	328	0.100472
CASZ1_3p_chr1_10856707_10856621_ENSG00000130940.10	-0.0548084	0.342855	208	0.10003
CASZ1_3p_chr1_10820914_10820758_ENSG00000130940.10	-0.0926448	0.585024	175	0.108436
CASZ1_3p_chr1_10765632_10765549_ENSG00000130940.10	-0.115445	0.668713	167	0.113213
CASZ1_3p_chr1_10753969_10753931_ENSG00000130940.10	-0.0538202	0.396384	258	0.101121
CASZ1_3p_chr1_10725628_10725140_ENSG00000130940.10	-0.0482803	0.333988	244	0.10003
CASZ1_3p_chr1_10720593_10719759_ENSG00000130940.10	-0.0695794	0.541141	274	0.10638
CASZ1_3p_chr1_10718633_10718565_ENSG00000130940.10	-0.0376734	0.278783	274	0.10003
CASZ1_3p_chr1_10716793_10716703_ENSG00000130940.10	-0.0861614	0.637972	249	0.111385
CASZ1_3p_chr1_10715870_10715706_ENSG00000130940.10	-0.00970042	0.131123	271	0.10003
CASZ1_3p_chr1_10714648_10714476_ENSG00000130940.10	-0.0528149	0.387354	273	0.100845
CASZ1_3p_chr1_10706383_10706185_ENSG00000130940.10	-0.054649	0.33607	199	0.10003
CASZ1_3p_chr1_10705145_10704974_ENSG00000130940.10	0.0107354	0.13009	208	0.10003
CASZ1_3p_chr1_10703368_10703217_ENSG00000130940.10	-0.0409957	0.26695	216	0.10003
CASZ1_3p_chr1_10703057_10702916_ENSG00000130940.10	-0.119611	0.761207	208	0.122961
TARDBP_5p_chr1_11078790_11078930_ENSG00000120948.11	-0.0113447	0.145346	328	0.10003
TARDBP_5p_chr1_11085167_11085548_ENSG00000120948.11	0.0494632	0.394192	286	0.101047
TARDBP_5p_chr1_11085608_11085796_ENSG00000120948.11	0.148436	0.734726	117	0.119582
SRM_3p_chr1_11120081_11119834_ENSG00000116649.5	-0.0208618	0.192271	328	0.10003
SRM_3p_chr1_11116814_11116661_ENSG00000116649.5	-0.0311527	0.253255	328	0.10003
SRM_3p_chr1_11115983_11115838_ENSG00000116649.5	0.0697348	0.601314	328	0.109042
EXOSC10_3p_chr1_11158213_11158077_ENSG00000171824.9	-0.023639	0.206904	328	0.10003
EXOSC10_3p_chr1_11155938_11155815_ENSG00000171824.9	-0.00849426	0.130734	328	0.10003
EXOSC10_3p_chr1_11151654_11151550_ENSG00000171824.9	-0.0562663	0.467907	328	0.103374
EXOSC10_3p_chr1_11151236_11151071_ENSG00000171824.9	-0.0319595	0.263404	328	0.10003
EXOSC10_3p_chr1_11150725_11150611_ENSG00000171824.9	-0.0220423	0.197619	328	0.10003
EXOSC10_3p_chr1_11148255_11148180_ENSG00000171824.9	-0.0574823	0.473081	328	0.103511
EXOSC10_3p_chr1_11147967_11147857_ENSG00000171824.9	-0.0601114	0.505581	328	0.104954
EXOSC10_3p_chr1_11147648_11147505_ENSG00000171824.9	-0.0460637	0.377058	328	0.100445
EXOSC10_3p_chr1_11142935_11142745_ENSG00000171824.9	0.0221415	0.203719	328	0.10003
EXOSC10_3p_chr1_11142680_11142591_ENSG00000171824.9	-0.0450891	0.38166	328	0.100595
EXOSC10_3p_chr1_11141295_11141139_ENSG00000171824.9	0.0201516	0.188005	328	0.10003
EXOSC10_3p_chr1_11140606_11140556_ENSG00000171824.9	0.0548138	0.451101	328	0.102631
EXOSC10_3p_chr1_11139879_11139768_ENSG00000171824.9	0.123609	0.936322	328	0.18905
EXOSC10_3p_chr1_11134065_11133991_ENSG00000171824.9	-0.0171775	0.171931	328	0.10003
EXOSC10_3p_chr1_11128141_11128065_ENSG00000171824.9	-0.0270743	0.231202	328	0.10003
RP4-635E18.6_5p_chr1_11161858_11162157_ENSG00000230337.1	0.0698903	0.387329	180	0.100845
MTOR_3p_chr1_11322564_11322502_ENSG00000198793.8	0.0237446	0.208025	325	0.10003
MTOR_3p_chr1_11319480_11319305_ENSG00000198793.8	0.00311876	0.110496	327	0.10003
MTOR_3p_chr1_11318650_11318542_ENSG00000198793.8	-0.00262714	0.10863	326	0.10003
MTOR_3p_chr1_11317222_11316990_ENSG00000198793.8	-0.015178	0.162921	327	0.10003
MTOR_3p_chr1_11316249_11316049_ENSG00000198793.8	0.059095	0.492463	326	0.104287
MTOR_3p_chr1_11314030_11313896_ENSG00000198793.8	0.0109412	0.141131	327	0.10003
MTOR_3p_chr1_11308151_11307876_ENSG00000198793.8	0.0467405	0.381336	326	0.100595
MTOR_3p_chr1_11307790_11307682_ENSG00000198793.8	0.0425924	0.349428	326	0.10003
MTOR_3p_chr1_11303357_11303171_ENSG00000198793.8	0.0446146	0.364214	324	0.100275
MTOR_3p_chr1_11301738_11301610_ENSG00000198793.8	0.0541141	0.450318	326	0.102599
MTOR_3p_chr1_11300604_11300360_ENSG00000198793.8	0.0531469	0.443129	326	0.102346
MTOR_3p_chr1_11298674_11298459_ENSG00000198793.8	0.0297374	0.247795	327	0.10003
MTOR_3p_chr1_11298105_11297900_ENSG00000198793.8	0.0251544	0.215783	326	0.10003
MTOR_3p_chr1_11294322_11294200_ENSG00000198793.8	0.0326944	0.273062	326	0.10003
MTOR_3p_chr1_11293544_11293455_ENSG00000198793.8	0.0422359	0.34702	327	0.10003
MTOR_3p_chr1_11292585_11292493_ENSG00000198793.8	0.0381028	0.310037	326	0.10003
MTOR_3p_chr1_11291491_11291357_ENSG00000198793.8	0.0236261	0.206798	326	0.10003
MTOR_3p_chr1_11291111_11290982_ENSG00000198793.8	0.0254677	0.223567	328	0.10003
MTOR_3p_chr1_11288975_11288725_ENSG00000198793.8	0.0392604	0.31925	327	0.10003
MTOR_3p_chr1_11276291_11276205_ENSG00000198793.8	-0.00400488	0.113481	327	0.10003
MTOR_3p_chr1_11273623_11273456_ENSG00000198793.8	0.00475574	0.116434	327	0.10003
MTOR_3p_chr1_11272965_11272853_ENSG00000198793.8	-0.0118624	0.144661	326	0.10003
MTOR_3p_chr1_11272531_11272369_ENSG00000198793.8	-0.0173583	0.171641	327	0.10003
MTOR_3p_chr1_11270963_11270871_ENSG00000198793.8	-0.0227099	0.200742	326	0.10003
MTOR_3p_chr1_11269515_11269369_ENSG00000198793.8	-0.0174465	0.17315	326	0.10003
MTOR_3p_chr1_11264760_11264618_ENSG00000198793.8	-0.015543	0.162218	328	0.10003
MTOR_3p_chr1_11259760_11259598_ENSG00000198793.8	-0.0136468	0.153273	328	0.10003
MTOR_3p_chr1_11259460_11259315_ENSG00000198793.8	0.0140947	0.155661	327	0.10003
MTOR_3p_chr1_11227574_11227499_ENSG00000198793.8	-0.0199574	0.189001	327	0.10003
MTOR_3p_chr1_11217348_11217209_ENSG00000198793.8	-0.0146518	0.158735	328	0.10003
MTOR_3p_chr1_11210283_11210183_ENSG00000198793.8	0.0444098	0.372404	328	0.10032
MTOR_3p_chr1_11206848_11206733_ENSG00000198793.8	0.00574716	0.120143	328	0.10003
MTOR_3p_chr1_11204723_11204705_ENSG00000198793.8	-0.0188632	0.180827	328	0.10003
MTOR_3p_chr1_11199717_11199590_ENSG00000198793.8	-0.0171652	0.171219	328	0.10003
MTOR_3p_chr1_11194523_11194408_ENSG00000198793.8	-0.0276268	0.235673	328	0.10003
MTOR_3p_chr1_11191615_11190586_ENSG00000198793.8	-0.0708709	0.604686	328	0.109435
MTOR_3p_chr1_11189895_11189795_ENSG00000198793.8	0.00549635	0.119543	328	0.10003
MTOR_3p_chr1_11189008_11188912_ENSG00000198793.8	-0.00144718	0.104785	327	0.10003
MTOR_3p_chr1_11188609_11188511_ENSG00000198793.8	0.00232616	0.107792	328	0.10003
MTOR_3p_chr1_11188183_11188061_ENSG00000198793.8	0.00138784	0.104579	328	0.10003
MTOR_3p_chr1_11187863_11187681_ENSG00000198793.8	-0.0179772	0.177569	328	0.10003
MTOR_3p_chr1_11187201_11187067_ENSG00000198793.8	-0.0158962	0.165463	328	0.10003
MTOR_3p_chr1_11186853_11186679_ENSG00000198793.8	-0.00669654	0.123732	328	0.10003
MTOR_3p_chr1_11184690_11184555_ENSG00000198793.8	-0.0122745	0.147826	328	0.10003
MTOR_3p_chr1_11182183_11182036_ENSG00000198793.8	-0.0131035	0.151571	328	0.10003
MTOR_3p_chr1_11181425_11181303_ENSG00000198793.8	-0.0237071	0.209297	328	0.10003
MTOR_3p_chr1_11177143_11177061_ENSG00000198793.8	0.00992307	0.137013	328	0.10003
MTOR_3p_chr1_11175720_11175453_ENSG00000198793.8	-0.0273512	0.233993	328	0.10003
MTOR_3p_chr1_11174944_11174870_ENSG00000198793.8	-0.0271537	0.229173	328	0.10003
MTOR_3p_chr1_11174686_11174375_ENSG00000198793.8	-0.0195111	0.185634	328	0.10003
MTOR_3p_chr1_11172974_11172909_ENSG00000198793.8	-0.0221446	0.20021	328	0.10003
MTOR_3p_chr1_11169786_11169706_ENSG00000198793.8	-0.0324327	0.269628	328	0.10003
MTOR_3p_chr1_11169427_11169347_ENSG00000198793.8	-0.017253	0.172285	328	0.10003
MTOR_3p_chr1_11168343_11168238_ENSG00000198793.8	-0.0387324	0.31373	328	0.10003
ANGPTL7_5p_chr1_11252327_11252427_ENSG00000171819.4	-0.0548613	0.463628	327	0.10312
ANGPTL7_5p_chr1_11253637_11253831_ENSG00000171819.4	-0.0422295	0.350744	327	0.10003
ANGPTL7_5p_chr1_11254518_11254716_ENSG00000171819.4	-0.0507355	0.424055	327	0.101871
ANGPTL7_5p_chr1_11254911_11256038_ENSG00000171819.4	-0.0485657	0.40391	327	0.101337
UBIAD1_5p_chr1_11345701_11348491_ENSG00000120942.9	-0.0606156	0.501503	327	0.10474
UBIAD1_5p_chr1_11352106_11352204_ENSG00000120942.9	-0.0500458	0.291457	163	0.10003
UBIAD1_5p_chr1_11353524_11353683_ENSG00000120942.9	0.0663994	0.368877	162	0.100281
UBIAD1_5p_chr1_11354930_11356106_ENSG00000120942.9	-0.00803027	0.118362	169	0.10003
PTCHD2_5p_chr1_11541315_11542017_ENSG00000204624.6	0.0873239	0.308635	65	0.10003
PTCHD2_5p_chr1_11561047_11562145_ENSG00000204624.6	-0.116474	0.434371	54	0.102057
PTCHD2_5p_chr1_11562735_11562954_ENSG00000204624.6	-0.0929655	0.34259	50	0.10003
PTCHD2_5p_chr1_11574447_11574583_ENSG00000204624.6	-0.108998	0.395727	50	0.101083
PTCHD2_5p_chr1_11575426_11575560_ENSG00000204624.6	-0.12662	0.432111	49	0.102001
PTCHD2_5p_chr1_11576058_11576218_ENSG00000204624.6	-0.102503	0.392713	55	0.101047
PTCHD2_5p_chr1_11577520_11577659_ENSG00000204624.6	-0.07581	0.279677	51	0.10003
PTCHD2_5p_chr1_11579776_11579937_ENSG00000204624.6	-0.0995519	0.36056	52	0.100211
PTCHD2_5p_chr1_11585233_11585369_ENSG00000204624.6	-0.112849	0.368193	47	0.100281
PTCHD2_5p_chr1_11586708_11586892_ENSG00000204624.6	-0.105677	0.314412	48	0.10003
PTCHD2_5p_chr1_11589613_11589743_ENSG00000204624.6	-0.126243	0.456083	49	0.102697
PTCHD2_5p_chr1_11589844_11590016_ENSG00000204624.6	-0.107016	0.40193	52	0.101337
PTCHD2_5p_chr1_11590964_11591090_ENSG00000204624.6	-0.0723878	0.238253	48	0.10003
PTCHD2_5p_chr1_11591622_11591767_ENSG00000204624.6	-0.120241	0.462291	53	0.103038
PTCHD2_5p_chr1_11594438_11594597_ENSG00000204624.6	-0.1497	0.390044	46	0.100915
PTCHD2_5p_chr1_11594927_11594930_ENSG00000204624.6	-0.120511	0.335168	45	0.10003
PTCHD2_5p_chr1_11595068_11595181_ENSG00000204624.6	-0.14826	0.335951	45	0.10003
PTCHD2_5p_chr1_11595535_11595701_ENSG00000204624.6	-0.193956	0.443928	50	0.102346
PTCHD2_5p_chr1_11596381_11597641_ENSG00000204624.6	-0.165988	0.379318	46	0.100491
FBXO2_3p_chr1_11714431_11714376_ENSG00000116661.9	-0.0206106	0.168573	190	0.10003
FBXO2_3p_chr1_11713586_11713448_ENSG00000116661.9	0.135825	0.871958	192	0.150081
FBXO2_3p_chr1_11710891_11710523_ENSG00000116661.9	-0.0263934	0.199682	207	0.10003
FBXO2_3p_chr1_11710131_11710002_ENSG00000116661.9	-0.00622487	0.119366	239	0.10003
FBXO2_3p_chr1_11709931_11709836_ENSG00000116661.9	-0.0145768	0.149941	234	0.10003
FBXO2_3p_chr1_11709282_11709144_ENSG00000116661.9	-0.0593095	0.419529	220	0.101809
FBXO44_5p_chr1_11715385_11715696_ENSG00000132879.9	-0.139039	0.967386	314	0.22627
FBXO44_5p_chr1_11715863_11716157_ENSG00000132879.9	-0.0277491	0.235228	315	0.10003
FBXO44_5p_chr1_11718324_11718450_ENSG00000132879.9	-0.0479203	0.402187	319	0.101337
FBXO44_5p_chr1_11718590_11718685_ENSG00000132879.9	-0.0670349	0.565511	315	0.107284
FBXO44_5p_chr1_11718793_11718928_ENSG00000132879.9	-0.0459373	0.382384	318	0.100595
FBXO44_5p_chr1_11721187_11723384_ENSG00000132879.9	-0.0864237	0.742193	320	0.120665
FBXO6_5p_chr1_11728713_11729001_ENSG00000116663.6	-0.00969792	0.133763	287	0.10003
FBXO6_5p_chr1_11731323_11731449_ENSG00000116663.6	-0.0233764	0.196764	284	0.10003
FBXO6_5p_chr1_11731985_11732080_ENSG00000116663.6	-0.0172147	0.166772	288	0.10003
FBXO6_5p_chr1_11733334_11733469_ENSG00000116663.6	-0.0279533	0.223757	279	0.10003
FBXO6_5p_chr1_11733672_11734411_ENSG00000116663.6	-0.036946	0.287636	287	0.10003
MAD2L2_3p_chr1_11751707_11751470_ENSG00000116670.10	0.291459	0.983877	120	0.276518
MAD2L2_3p_chr1_11742073_11741795_ENSG00000116670.10	0.174704	0.872978	121	0.150349
MAD2L2_3p_chr1_11737005_11736866_ENSG00000116670.10	-0.0806794	0.70536	328	0.116535
DRAXIN_5p_chr1_11769332_11769522_ENSG00000162490.6	-0.100894	0.249026	40	0.10003
DRAXIN_5p_chr1_11771908_11772022_ENSG00000162490.6	-0.0775578	0.246743	49	0.10003
DRAXIN_5p_chr1_11772397_11772486_ENSG00000162490.6	-0.0748281	0.262473	62	0.10003
DRAXIN_5p_chr1_11775176_11775265_ENSG00000162490.6	-0.0165083	0.121305	58	0.10003
DRAXIN_5p_chr1_11779641_11785914_ENSG00000162490.6	-0.0592352	0.201419	50	0.10003
AGTRAP_5p_chr1_11807497_11807602_ENSG00000177674.11	-0.0514916	0.440512	327	0.102277
AGTRAP_5p_chr1_11808472_11808667_ENSG00000177674.11	0.157687	0.984467	328	0.279639
AGTRAP_5p_chr1_11810134_11810826_ENSG00000177674.11	-0.0272854	0.238064	327	0.10003
MTHFR_3p_chr1_11866206_11865404_ENSG00000177000.6	0.0520264	0.346098	236	0.10003
MTHFR_3p_chr1_11865351_11865056_ENSG00000177000.6	-0.0377834	0.270641	236	0.10003
MTHFR_3p_chr1_11864589_11862938_ENSG00000177000.6	0.00577894	0.120785	318	0.10003
MTHFR_3p_chr1_11861456_11861218_ENSG00000177000.6	0.0135351	0.153843	307	0.10003
MTHFR_3p_chr1_11860379_11860269_ENSG00000177000.6	0.0546971	0.443695	304	0.102346
MTHFR_3p_chr1_11856456_11856263_ENSG00000177000.6	-0.00541217	0.119279	316	0.10003
MTHFR_3p_chr1_11855405_11855155_ENSG00000177000.6	0.00874045	0.131757	309	0.10003
MTHFR_3p_chr1_11854920_11854786_ENSG00000177000.6	-0.00479685	0.115945	283	0.10003
MTHFR_3p_chr1_11854595_11854415_ENSG00000177000.6	0.0279944	0.241968	319	0.10003
MTHFR_3p_chr1_11854146_11853964_ENSG00000177000.6	-0.00623083	0.120931	292	0.10003
MTHFR_3p_chr1_11852436_11852335_ENSG00000177000.6	-0.00883584	0.131811	294	0.10003
MTHFR_3p_chr1_11851383_11851264_ENSG00000177000.6	-0.0159145	0.166817	317	0.10003
CLCN6_5p_chr1_11867188_11867247_ENSG00000011021.17	-0.00533535	0.119147	326	0.10003
CLCN6_5p_chr1_11875903_11875968_ENSG00000011021.17	-0.0165364	0.170886	326	0.10003
CLCN6_5p_chr1_11876672_11876737_ENSG00000011021.17	-0.0342581	0.284349	325	0.10003
CLCN6_5p_chr1_11879545_11879611_ENSG00000011021.17	0.0383389	0.32074	325	0.10003
CLCN6_5p_chr1_11880419_11880836_ENSG00000011021.17	-0.084827	0.722061	323	0.118453
CLCN6_5p_chr1_11882752_11882858_ENSG00000011021.17	0.0685126	0.596081	319	0.108709
CLCN6_5p_chr1_11883764_11883890_ENSG00000011021.17	-0.014942	0.161479	317	0.10003
CLCN6_5p_chr1_11884543_11884610_ENSG00000011021.17	-0.00686595	0.12515	326	0.10003
CLCN6_5p_chr1_11886213_11886281_ENSG00000011021.17	0.0764922	0.665239	327	0.112921
CLCN6_5p_chr1_11887146_11887278_ENSG00000011021.17	0.0108011	0.140561	326	0.10003
CLCN6_5p_chr1_11888163_11888276_ENSG00000011021.17	0.00158555	0.105342	322	0.10003
CLCN6_5p_chr1_11888515_11888681_ENSG00000011021.17	0.0137308	0.151803	323	0.10003
CLCN6_5p_chr1_11889253_11889379_ENSG00000011021.17	-0.0494081	0.415639	325	0.101625
CLCN6_5p_chr1_11893572_11893695_ENSG00000011021.17	-0.108315	0.884919	325	0.155814
CLCN6_5p_chr1_11893934_11894087_ENSG00000011021.17	0.00584057	0.121132	326	0.10003
CLCN6_5p_chr1_11894293_11894452_ENSG00000011021.17	0.0142438	0.158285	324	0.10003
CLCN6_5p_chr1_11894541_11894647_ENSG00000011021.17	-0.0324883	0.274583	324	0.10003
CLCN6_5p_chr1_11896024_11896210_ENSG00000011021.17	-0.0199158	0.190242	324	0.10003
CLCN6_5p_chr1_11897056_11897213_ENSG00000011021.17	0.0227132	0.2075	327	0.10003
CLCN6_5p_chr1_11897400_11897556_ENSG00000011021.17	0.0266506	0.228127	327	0.10003
CLCN6_5p_chr1_11898392_11898499_ENSG00000011021.17	0.00655907	0.124057	323	0.10003
CLCN6_5p_chr1_11898592_11899107_ENSG00000011021.17	-0.0245432	0.218032	326	0.10003
CLCN6_5p_chr1_11900200_11901073_ENSG00000011021.17	-0.0394594	0.327275	325	0.10003
NPPA-AS1_5p_chr1_11903761_11904130_ENSG00000242349.1	0.0840695	0.417034	142	0.101768
NPPA-AS1_5p_chr1_11905604_11905765_ENSG00000242349.1	-0.0785083	0.467175	158	0.103337
NPPA_3p_chr1_11907490_11907170_ENSG00000175206.6	-0.0437025	0.208963	124	0.10003
NPPB_3p_chr1_11918988_11918759_ENSG00000120937.8	102.583	0.377283	45	0.100449
NPPB_3p_chr1_11918526_11918271_ENSG00000120937.8	0.017027	0.121983	31	0.10003
KIAA2013_3p_chr1_11986485_11985262_ENSG00000116685.11	0.0048089	0.117507	328	0.10003
PLOD1_5p_chr1_12004579_12004719_ENSG00000083444.12	-0.0337573	0.279847	326	0.10003
PLOD1_5p_chr1_12008033_12008124_ENSG00000083444.12	0.0261606	0.227299	326	0.10003
PLOD1_5p_chr1_12009830_12009963_ENSG00000083444.12	0.00150507	0.105033	327	0.10003
PLOD1_5p_chr1_12010414_12010577_ENSG00000083444.12	-0.0100923	0.137769	327	0.10003
PLOD1_5p_chr1_12012680_12012792_ENSG00000083444.12	-0.0193742	0.185562	327	0.10003
PLOD1_5p_chr1_12014887_12014950_ENSG00000083444.12	0.0114592	0.144246	327	0.10003
PLOD1_5p_chr1_12016974_12017071_ENSG00000083444.12	-0.00701689	0.125704	327	0.10003
PLOD1_5p_chr1_12017147_12017250_ENSG00000083444.12	-0.02467	0.217831	327	0.10003
PLOD1_5p_chr1_12017899_12018000_ENSG00000083444.12	0.0174244	0.17571	327	0.10003
PLOD1_5p_chr1_12018573_12018704_ENSG00000083444.12	-0.00545918	0.119742	327	0.10003
PLOD1_5p_chr1_12020703_12020824_ENSG00000083444.12	0.00530516	0.118962	327	0.10003
PLOD1_5p_chr1_12023589_12023693_ENSG00000083444.12	-0.0316824	0.267324	327	0.10003
PLOD1_5p_chr1_12024232_12024357_ENSG00000083444.12	0.0277989	0.239353	327	0.10003
PLOD1_5p_chr1_12024701_12024842_ENSG00000083444.12	-0.123266	0.922593	328	0.178261
PLOD1_5p_chr1_12025537_12025650_ENSG00000083444.12	0.0474206	0.403561	327	0.101337
PLOD1_5p_chr1_12026308_12026373_ENSG00000083444.12	0.0869092	0.743043	327	0.120665
PLOD1_5p_chr1_12027044_12027148_ENSG00000083444.12	0.0641991	0.545411	327	0.106499
PLOD1_5p_chr1_12030727_12030873_ENSG00000083444.12	-0.0737513	0.609508	328	0.109696
PLOD1_5p_chr1_12032929_12033054_ENSG00000083444.12	0.000815552	0.102754	327	0.10003
PLOD1_5p_chr1_12034710_12035595_ENSG00000083444.12	0.0710592	0.618145	327	0.11007
MFN2_5p_chr1_12041867_12041910_ENSG00000116688.12	-0.0962356	0.812094	328	0.132458
MFN2_5p_chr1_12042027_12042171_ENSG00000116688.12	0.0328678	0.270996	328	0.10003
MFN2_5p_chr1_12042580_12042647_ENSG00000116688.12	-0.0527485	0.444034	328	0.102346
MFN2_5p_chr1_12049222_12049400_ENSG00000116688.12	-0.0620523	0.538096	328	0.106274
MFN2_5p_chr1_12052336_12052520_ENSG00000116688.12	0.00306798	0.110488	328	0.10003
MFN2_5p_chr1_12052612_12052747_ENSG00000116688.12	0.00243666	0.108339	328	0.10003
MFN2_5p_chr1_12056213_12056375_ENSG00000116688.12	0.0810225	0.719294	328	0.118124
MFN2_5p_chr1_12057354_12057478_ENSG00000116688.12	0.0805367	0.704045	328	0.116449
MFN2_5p_chr1_12058827_12058935_ENSG00000116688.12	0.0105596	0.140164	328	0.10003
MFN2_5p_chr1_12059045_12059152_ENSG00000116688.12	0.0284431	0.241013	328	0.10003
MFN2_5p_chr1_12061458_12061611_ENSG00000116688.12	0.0355101	0.299464	328	0.10003
MFN2_5p_chr1_12061826_12061893_ENSG00000116688.12	0.00252108	0.108567	328	0.10003
MFN2_5p_chr1_12062039_12062160_ENSG00000116688.12	0.0216386	0.199605	328	0.10003
MFN2_5p_chr1_12064049_12064175_ENSG00000116688.12	0.0597951	0.522398	328	0.105588
MFN2_5p_chr1_12064566_12064670_ENSG00000116688.12	0.0588551	0.504382	328	0.104907
MFN2_5p_chr1_12064882_12064984_ENSG00000116688.12	0.0777658	0.677428	328	0.114037
MFN2_5p_chr1_12065768_12065988_ENSG00000116688.12	-0.0245115	0.217622	328	0.10003
MFN2_5p_chr1_12066595_12066750_ENSG00000116688.12	0.00556437	0.119756	328	0.10003
MFN2_5p_chr1_12067110_12067306_ENSG00000116688.12	0.0188724	0.181438	328	0.10003
MFN2_5p_chr1_12069649_12069783_ENSG00000116688.12	0.0245368	0.212679	328	0.10003
MFN2_5p_chr1_12071553_12073571_ENSG00000116688.12	0.0629176	0.559237	328	0.107016
MIIP_5p_chr1_12081702_12081897_ENSG00000116691.6	-0.150433	0.983111	328	0.271346
MIIP_5p_chr1_12082152_12082499_ENSG00000116691.6	-0.0764002	0.687809	328	0.114596
MIIP_5p_chr1_12082890_12082974_ENSG00000116691.6	0.00752903	0.128319	328	0.10003
MIIP_5p_chr1_12089280_12090181_ENSG00000116691.6	-0.0101344	0.139798	328	0.10003
MIIP_5p_chr1_12091598_12092102_ENSG00000116691.6	0.100042	0.838764	328	0.139219
TNFRSF8_5p_chr1_12144521_12144608_ENSG00000120949.10	0.366362	0.217545	22	0.10003
TNFRSF8_5p_chr1_12157158_12157274_ENSG00000120949.10	0.243269	0.50899	26	0.105092
TNFRSF8_5p_chr1_12164436_12164588_ENSG00000120949.10	0.172745	0.273627	24	0.10003
TNFRSF8_5p_chr1_12169623_12169713_ENSG00000120949.10	0.167992	0.394373	27	0.101047
TNFRSF8_5p_chr1_12170098_12170261_ENSG00000120949.10	0.23719	0.608619	31	0.109696
TNFRSF8_5p_chr1_12171955_12172071_ENSG00000120949.10	0.128994	0.238381	26	0.10003
TNFRSF8_5p_chr1_12175634_12175786_ENSG00000120949.10	0.323252	0.19395	29	0.10003
TNFRSF8_5p_chr1_12183341_12183434_ENSG00000120949.10	0.367153	0.760119	29	0.122832
TNFRSF8_5p_chr1_12183772_12183884_ENSG00000120949.10	0.0169065	0.115756	28	0.10003
TNFRSF8_5p_chr1_12186240_12186293_ENSG00000120949.10	0.272638	0.713754	32	0.117458
TNFRSF8_5p_chr1_12195645_12195670_ENSG00000120949.10	0.259227	0.629375	30	0.11075
TNFRSF8_5p_chr1_12198286_12198493_ENSG00000120949.10	0.050849	0.131175	28	0.10003
TNFRSF8_5p_chr1_12202344_12204264_ENSG00000120949.10	0.343289	0.633529	24	0.110989
TNFRSF1B_5p_chr1_12248853_12248952_ENSG00000028137.12	-0.00851369	0.112711	79	0.10003
TNFRSF1B_5p_chr1_12251014_12251142_ENSG00000028137.12	0.0203026	0.144325	119	0.10003
TNFRSF1B_5p_chr1_12251831_12251980_ENSG00000028137.12	0.0252776	0.16227	133	0.10003
TNFRSF1B_5p_chr1_12252405_12252581_ENSG00000028137.12	0.138946	0.734797	137	0.119582
TNFRSF1B_5p_chr1_12252920_12253155_ENSG00000028137.12	-0.00452874	0.109676	141	0.10003
TNFRSF1B_5p_chr1_12254012_12254089_ENSG00000028137.12	0.0269835	0.164028	125	0.10003
TNFRSF1B_5p_chr1_12254641_12254675_ENSG00000028137.12	-0.025737	0.174422	163	0.10003
TNFRSF1B_5p_chr1_12262024_12262228_ENSG00000028137.12	-0.063131	0.352777	163	0.10003
TNFRSF1B_5p_chr1_12266797_12269285_ENSG00000028137.12	0.0160117	0.136629	132	0.10003
VPS13D_5p_chr1_12294248_12294420_ENSG00000048707.9	-0.0784907	0.645925	295	0.111879
VPS13D_5p_chr1_12302570_12302647_ENSG00000048707.9	-0.0492707	0.406738	311	0.101339
VPS13D_5p_chr1_12304303_12304493_ENSG00000048707.9	-0.0157856	0.164006	312	0.10003
VPS13D_5p_chr1_12304594_12304674_ENSG00000048707.9	-0.0327666	0.273004	319	0.10003
VPS13D_5p_chr1_12309280_12309660_ENSG00000048707.9	-0.0355492	0.277046	321	0.10003
VPS13D_5p_chr1_12313779_12313883_ENSG00000048707.9	-0.0559975	0.442923	314	0.102334
VPS13D_5p_chr1_12316333_12316560_ENSG00000048707.9	0.0358657	0.295033	310	0.10003
VPS13D_5p_chr1_12317044_12317144_ENSG00000048707.9	-0.0227263	0.197803	312	0.10003
VPS13D_5p_chr1_12317992_12318160_ENSG00000048707.9	0.00472258	0.115381	302	0.10003
VPS13D_5p_chr1_12320750_12320851_ENSG00000048707.9	0.00247735	0.108144	321	0.10003
VPS13D_5p_chr1_12321005_12321206_ENSG00000048707.9	-0.0184718	0.177147	319	0.10003
VPS13D_5p_chr1_12321958_12322137_ENSG00000048707.9	0.0402919	0.320165	309	0.10003
VPS13D_5p_chr1_12326938_12327068_ENSG00000048707.9	0.017884	0.171417	305	0.10003
VPS13D_5p_chr1_12327902_12327977_ENSG00000048707.9	-2.27994e-05	0.100071	314	0.1
VPS13D_5p_chr1_12328763_12328933_ENSG00000048707.9	0.0574244	0.47231	312	0.103498
VPS13D_5p_chr1_12331051_12331181_ENSG00000048707.9	0.0108527	0.137938	301	0.10003
VPS13D_5p_chr1_12333060_12333192_ENSG00000048707.9	-0.0327585	0.270851	318	0.10003
VPS13D_5p_chr1_12335882_12338095_ENSG00000048707.9	-0.0108882	0.140659	319	0.10003
VPS13D_5p_chr1_12339556_12339707_ENSG00000048707.9	0.0653634	0.555519	319	0.106932
VPS13D_5p_chr1_12342762_12343793_ENSG00000048707.9	-0.029551	0.242608	311	0.10003
VPS13D_5p_chr1_12348280_12348370_ENSG00000048707.9	-0.019141	0.183682	317	0.10003
VPS13D_5p_chr1_12351055_12351181_ENSG00000048707.9	-0.0675538	0.579697	319	0.10837
VPS13D_5p_chr1_12353581_12353761_ENSG00000048707.9	-0.0186803	0.180127	324	0.10003
VPS13D_5p_chr1_12359259_12359441_ENSG00000048707.9	0.00247095	0.108204	322	0.10003
VPS13D_5p_chr1_12364563_12364785_ENSG00000048707.9	0.0150277	0.159973	320	0.10003
VPS13D_5p_chr1_12368488_12368698_ENSG00000048707.9	0.0577546	0.487733	324	0.104177
VPS13D_5p_chr1_12371511_12371682_ENSG00000048707.9	0.035525	0.290866	323	0.10003
VPS13D_5p_chr1_12371870_12371982_ENSG00000048707.9	0.0519337	0.433773	321	0.102057
VPS13D_5p_chr1_12374172_12374384_ENSG00000048707.9	-0.0207632	0.188932	323	0.10003
VPS13D_5p_chr1_12378129_12378394_ENSG00000048707.9	-0.0227585	0.201624	323	0.10003
VPS13D_5p_chr1_12379554_12379687_ENSG00000048707.9	0.043479	0.357011	323	0.100083
VPS13D_5p_chr1_12381866_12382021_ENSG00000048707.9	0.0463409	0.382321	325	0.100595
VPS13D_5p_chr1_12382593_12382803_ENSG00000048707.9	0.0460875	0.377313	323	0.100449
VPS13D_5p_chr1_12383763_12383837_ENSG00000048707.9	0.0788541	0.673892	320	0.113827
VPS13D_5p_chr1_12387705_12387911_ENSG00000048707.9	0.0227744	0.205579	326	0.10003
VPS13D_5p_chr1_12389886_12389975_ENSG00000048707.9	0.0437682	0.354044	324	0.10003
VPS13D_5p_chr1_12393283_12393423_ENSG00000048707.9	0.00146944	0.104738	325	0.10003
VPS13D_5p_chr1_12395762_12398045_ENSG00000048707.9	0.0187896	0.181911	325	0.10003
VPS13D_5p_chr1_12398288_12398362_ENSG00000048707.9	-0.02152	0.192388	323	0.10003
VPS13D_5p_chr1_12401837_12401942_ENSG00000048707.9	-0.0273128	0.231391	323	0.10003
VPS13D_5p_chr1_12402956_12403108_ENSG00000048707.9	-0.0146262	0.159989	326	0.10003
VPS13D_5p_chr1_12405431_12405566_ENSG00000048707.9	0.0416755	0.346218	324	0.10003
VPS13D_5p_chr1_12406662_12406709_ENSG00000048707.9	-0.00707225	0.124939	325	0.10003
VPS13D_5p_chr1_12408880_12409431_ENSG00000048707.9	-4.36147e-05	0.100139	326	0.1
VPS13D_5p_chr1_12414031_12414278_ENSG00000048707.9	0.126818	0.939999	324	0.192543
VPS13D_5p_chr1_12415956_12416147_ENSG00000048707.9	-0.0231729	0.208475	325	0.10003
VPS13D_5p_chr1_12416455_12416581_ENSG00000048707.9	-0.043021	0.35456	325	0.10003
VPS13D_5p_chr1_12418515_12418657_ENSG00000048707.9	-0.0317398	0.263331	324	0.10003
VPS13D_5p_chr1_12422776_12422906_ENSG00000048707.9	-0.00766223	0.127318	324	0.10003
VPS13D_5p_chr1_12423128_12423303_ENSG00000048707.9	-0.00433558	0.115224	328	0.10003
VPS13D_5p_chr1_12428523_12428646_ENSG00000048707.9	0.0421838	0.347484	327	0.10003
VPS13D_5p_chr1_12429522_12429757_ENSG00000048707.9	0.0322408	0.264586	326	0.10003
VPS13D_5p_chr1_12433805_12433913_ENSG00000048707.9	-0.0128357	0.150565	324	0.10003
VPS13D_5p_chr1_12438482_12438645_ENSG00000048707.9	0.0276424	0.23376	327	0.10003
VPS13D_5p_chr1_12439542_12439650_ENSG00000048707.9	0.0127609	0.149196	328	0.10003
VPS13D_5p_chr1_12443035_12443214_ENSG00000048707.9	-0.00583881	0.121312	328	0.10003
VPS13D_5p_chr1_12445319_12445432_ENSG00000048707.9	-0.0140812	0.158738	328	0.10003
VPS13D_5p_chr1_12446244_12446393_ENSG00000048707.9	-0.0101857	0.139845	328	0.10003
VPS13D_5p_chr1_12460238_12460387_ENSG00000048707.9	-0.0458793	0.384062	328	0.100708
VPS13D_5p_chr1_12461661_12461757_ENSG00000048707.9	-0.04253	0.361472	328	0.100211
VPS13D_5p_chr1_12462621_12462755_ENSG00000048707.9	0.00843017	0.130863	328	0.10003
VPS13D_5p_chr1_12463878_12464026_ENSG00000048707.9	-0.0320521	0.271893	328	0.10003
VPS13D_5p_chr1_12475140_12475274_ENSG00000048707.9	-0.0241512	0.216949	328	0.10003
VPS13D_5p_chr1_12476713_12476880_ENSG00000048707.9	-0.0070304	0.126055	328	0.10003
VPS13D_5p_chr1_12516054_12516186_ENSG00000048707.9	-0.0779621	0.690225	328	0.114922
VPS13D_5p_chr1_12520256_12520451_ENSG00000048707.9	-0.0332545	0.280549	328	0.10003
VPS13D_5p_chr1_12557554_12557685_ENSG00000048707.9	0.0302397	0.253007	328	0.10003
VPS13D_5p_chr1_12566907_12567147_ENSG00000048707.9	-0.0215543	0.200561	328	0.10003
VPS13D_5p_chr1_12568947_12572099_ENSG00000048707.9	0.0116745	0.145738	328	0.10003
DHRS3_3p_chr1_12677737_12677159_ENSG00000162496.4	0.0814959	0.500203	274	0.104669
DHRS3_3p_chr1_12676799_12676564_ENSG00000162496.4	-0.0865272	0.654383	275	0.112397
DHRS3_3p_chr1_12656321_12655999_ENSG00000162496.4	0.0862524	0.65002	280	0.112187
DHRS3_3p_chr1_12639440_12639321_ENSG00000162496.4	-0.0802111	0.653907	289	0.112397
DHRS3_3p_chr1_12638984_12638746_ENSG00000162496.4	-0.0404995	0.318402	290	0.10003
DHRS3_3p_chr1_12632881_12632756_ENSG00000162496.4	0.0294578	0.237287	291	0.10003
PRAMEF16_5p_chr1_13497570_13498260_ENSG00000204488.3	0.0161229	0.12844	57	0.10003
PRAMEF21_5p_chr1_13523737_13524315_ENSG00000204486.3	0.542352	0.988507	56	0.303249
PRAMEF15_5p_chr1_13644784_13645092_ENSG00000157358.7	0.074131	0.103836	55	0.10003
PDPN_5p_chr1_13933668_13933801_ENSG00000162493.12	-0.181626	0.78517	76	0.126803
PDPN_5p_chr1_13936882_13937011_ENSG00000162493.12	-0.198355	0.845695	76	0.141527
PDPN_5p_chr1_13940182_13940220_ENSG00000162493.12	-0.187043	0.801626	75	0.130221
PDPN_5p_chr1_13940795_13941009_ENSG00000162493.12	-0.00727988	0.111786	68	0.10003
PDPN_5p_chr1_13942400_13944452_ENSG00000162493.12	-0.200242	0.841812	72	0.140129
PRDM2_5p_chr1_14042036_14042109_ENSG00000116731.18	0.228409	0.419957	30	0.101809
PRDM2_5p_chr1_14057495_14057612_ENSG00000116731.18	0.0724037	0.262034	81	0.10003
PRDM2_5p_chr1_14059274_14059377_ENSG00000116731.18	-0.00584921	0.113047	145	0.10003
PRDM2_5p_chr1_14068500_14068652_ENSG00000116731.18	-0.0445357	0.271066	179	0.10003
PRDM2_5p_chr1_14075856_14075982_ENSG00000116731.18	-0.144137	0.900307	211	0.164332
PRDM2_5p_chr1_14099573_14099683_ENSG00000116731.18	0.0418164	0.350866	326	0.10003
PRDM2_5p_chr1_14104913_14109326_ENSG00000116731.18	0.0654433	0.575346	325	0.10801
PRDM2_5p_chr1_14113010_14114574_ENSG00000116731.18	-0.0178462	0.175278	327	0.10003
PRDM2_5p_chr1_14142922_14143065_ENSG00000116731.18	0.120996	0.873231	252	0.150349
PRDM2_5p_chr1_14149654_14151574_ENSG00000116731.18	0.147937	0.951874	246	0.205872
KAZN_5p_chr1_15287180_15287371_ENSG00000189337.11	0.0272187	0.197767	197	0.10003
KAZN_5p_chr1_15361245_15361381_ENSG00000189337.11	-0.0863526	0.620168	258	0.110178
KAZN_5p_chr1_15370485_15370655_ENSG00000189337.11	-0.00174387	0.104689	273	0.10003
KAZN_5p_chr1_15382587_15382776_ENSG00000189337.11	-0.0086067	0.12918	269	0.10003
KAZN_5p_chr1_15386668_15386798_ENSG00000189337.11	0.0157003	0.155449	243	0.10003
KAZN_5p_chr1_15390068_15390118_ENSG00000189337.11	-0.0201201	0.178237	260	0.10003
KAZN_5p_chr1_15392126_15394651_ENSG00000189337.11	-0.0439602	0.325243	261	0.10003
TMEM51-AS1_3p_chr1_15478960_15478787_ENSG00000175147.7	0.0557837	0.195208	54	0.10003
TMEM51-AS1_3p_chr1_15450869_15450724_ENSG00000175147.7	-0.115052	0.420077	72	0.101809
TMEM51-AS1_3p_chr1_15447555_15447468_ENSG00000175147.7	0.181525	0.460686	38	0.102886
TMEM51-AS1_3p_chr1_15447193_15447073_ENSG00000175147.7	0.0296761	0.13025	37	0.10003
TMEM51-AS1_3p_chr1_15445400_15444823_ENSG00000175147.7	-0.236183	0.539365	37	0.106323
TMEM51_5p_chr1_15536986_15537058_ENSG00000171729.9	-0.0304356	0.237764	289	0.10003
TMEM51_5p_chr1_15541391_15541927_ENSG00000171729.9	0.00355723	0.111719	296	0.10003
TMEM51_5p_chr1_15545822_15546976_ENSG00000171729.9	0.0415774	0.340859	319	0.10003
C1orf195_3p_chr1_15497813_15497677_ENSG00000204464.3	-0.00862039	0.129223	289	0.10003
FHAD1_5p_chr1_15578267_15578373_ENSG00000142621.15	-0.00753296	0.109474	52	0.10003
FHAD1_5p_chr1_15598819_15599025_ENSG00000142621.15	-0.0710107	0.227105	56	0.10003
FHAD1_5p_chr1_15623180_15623289_ENSG00000142621.15	-0.120359	0.378601	53	0.100484
FHAD1_5p_chr1_15627701_15627937_ENSG00000142621.15	0.000650504	0.100826	59	0.100026
FHAD1_5p_chr1_15635109_15635232_ENSG00000142621.15	0.120838	0.396172	63	0.101121
FHAD1_5p_chr1_15639553_15639683_ENSG00000142621.15	0.0116308	0.115794	50	0.10003
FHAD1_5p_chr1_15640938_15641094_ENSG00000142621.15	0.150428	0.555607	63	0.106932
FHAD1_5p_chr1_15641543_15641735_ENSG00000142621.15	-0.213501	0.806675	62	0.131195
FHAD1_5p_chr1_15642874_15642963_ENSG00000142621.15	0.0248832	0.137985	62	0.10003
FHAD1_5p_chr1_15644320_15644424_ENSG00000142621.15	0.0731135	0.2631	76	0.10003
FHAD1_5p_chr1_15650948_15651055_ENSG00000142621.15	0.0945532	0.288794	53	0.10003
FHAD1_5p_chr1_15668232_15668389_ENSG00000142621.15	0.015064	0.115565	39	0.10003
FHAD1_5p_chr1_15671579_15671686_ENSG00000142621.15	-0.0507727	0.184659	50	0.10003
FHAD1_5p_chr1_15671912_15672102_ENSG00000142621.15	-0.0808381	0.22117	42	0.10003
FHAD1_5p_chr1_15675538_15675645_ENSG00000142621.15	0.109062	0.240364	39	0.10003
FHAD1_5p_chr1_15679373_15679480_ENSG00000142621.15	-0.102133	0.2153	32	0.10003
FHAD1_5p_chr1_15684606_15684779_ENSG00000142621.15	-0.148184	0.288114	34	0.10003
FHAD1_5p_chr1_15686974_15687199_ENSG00000142621.15	-0.0978098	0.211059	45	0.10003
FHAD1_5p_chr1_15689138_15689222_ENSG00000142621.15	-0.151087	0.435567	45	0.102084
FHAD1_5p_chr1_15695866_15695998_ENSG00000142621.15	0.237549	0.525084	36	0.105711
FHAD1_5p_chr1_15700998_15701127_ENSG00000142621.15	-0.000167993	0.100116	33	0.1
RP3-467K16.2_3p_chr1_15670372_15670272_ENSG00000233485.1	-0.0620327	0.213621	53	0.10003
EFHD2_5p_chr1_15752367_15752514_ENSG00000142634.8	-0.103624	0.840781	328	0.13962
EFHD2_5p_chr1_15753646_15753780_ENSG00000142634.8	0.00699108	0.12508	328	0.10003
CASP9_3p_chr1_15850940_15850564_ENSG00000132906.13	-0.0719772	0.613271	326	0.1098
CASP9_3p_chr1_15844890_15844605_ENSG00000132906.13	-0.0739645	0.616544	326	0.109942
CASP9_3p_chr1_15834402_15834368_ENSG00000132906.13	-0.0298527	0.247369	325	0.10003
CASP9_3p_chr1_15833628_15833394_ENSG00000132906.13	-0.0489164	0.399951	325	0.101273
CASP9_3p_chr1_15832574_15832485_ENSG00000132906.13	-0.0792091	0.673728	323	0.113827
CASP9_3p_chr1_15831253_15831106_ENSG00000132906.13	-0.0115949	0.143615	323	0.10003
CASP9_3p_chr1_15821947_15821768_ENSG00000132906.13	-0.0661915	0.561831	325	0.107157
DNAJC16_5p_chr1_15855583_15855767_ENSG00000116138.8	-0.020631	0.183858	324	0.10003
DNAJC16_5p_chr1_15860732_15860798_ENSG00000116138.8	-0.0547896	0.444121	323	0.102346
DNAJC16_5p_chr1_15862970_15863309_ENSG00000116138.8	-0.0480379	0.384342	323	0.100708
DNAJC16_5p_chr1_15870894_15871078_ENSG00000116138.8	-0.0647972	0.541836	327	0.106405
DNAJC16_5p_chr1_15873262_15873366_ENSG00000116138.8	-0.04806	0.386341	321	0.100801
DNAJC16_5p_chr1_15874765_15874923_ENSG00000116138.8	-0.0673725	0.566013	324	0.107293
DNAJC16_5p_chr1_15886021_15886151_ENSG00000116138.8	-0.0774084	0.656383	328	0.112433
DNAJC16_5p_chr1_15888637_15888820_ENSG00000116138.8	-0.0481806	0.394931	327	0.101047
DNAJC16_5p_chr1_15890424_15890606_ENSG00000116138.8	-0.0605856	0.50459	327	0.104912
DNAJC16_5p_chr1_15890778_15890854_ENSG00000116138.8	-0.0817676	0.691118	326	0.114953
DNAJC16_5p_chr1_15891677_15891948_ENSG00000116138.8	-0.121963	0.918637	327	0.175193
DNAJC16_5p_chr1_15892577_15893090_ENSG00000116138.8	-0.0806066	0.683849	328	0.114201
DNAJC16_5p_chr1_15894273_15898228_ENSG00000116138.8	-0.0388112	0.312576	325	0.10003
AGMAT_3p_chr1_15911605_15911191_ENSG00000116771.5	-0.0495302	0.289821	180	0.10003
AGMAT_3p_chr1_15909890_15909688_ENSG00000116771.5	-0.126441	0.791802	206	0.128155
AGMAT_3p_chr1_15906637_15906589_ENSG00000116771.5	-0.121877	0.774199	209	0.124968
AGMAT_3p_chr1_15905549_15905354_ENSG00000116771.5	-0.0940009	0.595263	205	0.108709
AGMAT_3p_chr1_15904359_15904180_ENSG00000116771.5	-0.126687	0.797205	211	0.129379
AGMAT_3p_chr1_15901254_15901252_ENSG00000116771.5	-0.0579329	0.343803	205	0.10003
DDI2_5p_chr1_15953164_15953293_ENSG00000197312.7	-0.0749984	0.620314	319	0.110194
DDI2_5p_chr1_15956820_15957056_ENSG00000197312.7	-0.0618512	0.51416	325	0.105362
DDI2_5p_chr1_15959934_15960060_ENSG00000197312.7	-0.075087	0.639684	327	0.111505
DDI2_5p_chr1_15964802_15964929_ENSG00000197312.7	-0.00611586	0.121227	327	0.10003
DDI2_5p_chr1_15970017_15970145_ENSG00000197312.7	-0.0596276	0.493706	328	0.104287
DDI2_5p_chr1_15976215_15976318_ENSG00000197312.7	-0.0485027	0.395622	324	0.101083
DDI2_5p_chr1_15978201_15978390_ENSG00000197312.7	-0.064597	0.532245	327	0.105946
DDI2_5p_chr1_15983112_15983174_ENSG00000197312.7	-0.0608003	0.502183	328	0.104769
DDI2_5p_chr1_15986332_15986363_ENSG00000197312.7	-0.0556103	0.439294	327	0.102201
PLEKHM2_5p_chr1_16042732_16042838_ENSG00000116786.7	-0.0752916	0.630799	328	0.110868
PLEKHM2_5p_chr1_16043202_16043311_ENSG00000116786.7	-0.0418357	0.332067	328	0.10003
PLEKHM2_5p_chr1_16044388_16044487_ENSG00000116786.7	-0.0167526	0.168307	327	0.10003
PLEKHM2_5p_chr1_16045033_16045120_ENSG00000116786.7	0.000872053	0.10279	327	0.10003
PLEKHM2_5p_chr1_16046229_16046415_ENSG00000116786.7	-0.0146127	0.15851	328	0.10003
PLEKHM2_5p_chr1_16047824_16047883_ENSG00000116786.7	0.0551942	0.40708	328	0.101339
PLEKHM2_5p_chr1_16051812_16052040_ENSG00000116786.7	-0.0681204	0.567163	328	0.107322
PLEKHM2_5p_chr1_16053509_16054327_ENSG00000116786.7	-0.0741082	0.616534	328	0.109942
PLEKHM2_5p_chr1_16054574_16054643_ENSG00000116786.7	-0.0628926	0.51519	328	0.105368
PLEKHM2_5p_chr1_16054762_16054852_ENSG00000116786.7	-0.0478218	0.38154	328	0.100595
PLEKHM2_5p_chr1_16055164_16055228_ENSG00000116786.7	-0.0240162	0.208422	328	0.10003
PLEKHM2_5p_chr1_16055597_16055685_ENSG00000116786.7	-0.0288502	0.237897	328	0.10003
PLEKHM2_5p_chr1_16056292_16056424_ENSG00000116786.7	-0.0602132	0.491009	328	0.104287
PLEKHM2_5p_chr1_16057027_16057217_ENSG00000116786.7	-0.0654793	0.53999	328	0.106323
PLEKHM2_5p_chr1_16057687_16057752_ENSG00000116786.7	-0.0497749	0.393841	328	0.101047
PLEKHM2_5p_chr1_16058384_16058543_ENSG00000116786.7	0.0305098	0.250127	328	0.10003
PLEKHM2_5p_chr1_16058845_16058881_ENSG00000116786.7	-0.0503079	0.408741	328	0.10144
PLEKHM2_5p_chr1_16059107_16059223_ENSG00000116786.7	-0.0883654	0.736724	328	0.119935
PLEKHM2_5p_chr1_16060292_16061264_ENSG00000116786.7	-0.0537275	0.434141	328	0.102057
SLC25A34_5p_chr1_16064588_16064740_ENSG00000162461.7	0.0708008	0.165756	42	0.10003
SLC25A34_5p_chr1_16065089_16065223_ENSG00000162461.7	-0.0603733	0.179143	50	0.10003
SLC25A34_5p_chr1_16065719_16066545_ENSG00000162461.7	-0.0234831	0.128851	56	0.10003
FBLIM1_5p_chr1_16084669_16084850_ENSG00000162458.8	-0.0458869	0.22813	135	0.10003
FBLIM1_5p_chr1_16090988_16091180_ENSG00000162458.8	0.0357633	0.257494	264	0.10003
FBLIM1_5p_chr1_16093871_16094058_ENSG00000162458.8	-0.0532241	0.402393	262	0.101337
FBLIM1_5p_chr1_16095023_16095125_ENSG00000162458.8	0.021941	0.186069	257	0.10003
FBLIM1_5p_chr1_16096904_16097073_ENSG00000162458.8	-0.0291194	0.227887	266	0.10003
FBLIM1_5p_chr1_16101113_16101737_ENSG00000162458.8	-0.0480566	0.364888	268	0.100281
FBLIM1_5p_chr1_16111043_16113089_ENSG00000162458.8	-0.0505124	0.395975	277	0.101091
SPEN_5p_chr1_16199311_16199631_ENSG00000065526.6	-0.0267619	0.231493	324	0.10003
SPEN_5p_chr1_16202697_16203206_ENSG00000065526.6	0.0607288	0.526798	325	0.105818
SPEN_5p_chr1_16235816_16235976_ENSG00000065526.6	-0.00502263	0.117587	324	0.10003
SPEN_5p_chr1_16237596_16237796_ENSG00000065526.6	-0.0281084	0.241289	323	0.10003
SPEN_5p_chr1_16242623_16242774_ENSG00000065526.6	-0.0127217	0.150564	324	0.10003
SPEN_5p_chr1_16245421_16245546_ENSG00000065526.6	-0.00139904	0.104643	324	0.10003
SPEN_5p_chr1_16245899_16246012_ENSG00000065526.6	-0.0125894	0.149926	323	0.10003
SPEN_5p_chr1_16247365_16247478_ENSG00000065526.6	-0.00959237	0.136532	323	0.10003
SPEN_5p_chr1_16248744_16248844_ENSG00000065526.6	-0.00221992	0.107598	327	0.10003
SPEN_5p_chr1_16254586_16262761_ENSG00000065526.6	-0.0257488	0.225703	325	0.10003
SPEN_5p_chr1_16263658_16264140_ENSG00000065526.6	0.0101909	0.138395	328	0.10003
SPEN_5p_chr1_16264307_16264501_ENSG00000065526.6	-0.0115844	0.145648	328	0.10003
SPEN_5p_chr1_16265791_16266955_ENSG00000065526.6	-0.0345582	0.287726	328	0.10003
ZBTB17_3p_chr1_16302627_16302478_ENSG00000116809.7	-0.0375065	0.314794	328	0.10003
ZBTB17_3p_chr1_16299620_16299534_ENSG00000116809.7	-0.010764	0.141947	327	0.10003
ZBTB17_3p_chr1_16274992_16274786_ENSG00000116809.7	-0.0341724	0.286528	328	0.10003
ZBTB17_3p_chr1_16273787_16273652_ENSG00000116809.7	-0.0267523	0.225809	328	0.10003
ZBTB17_3p_chr1_16273618_16273430_ENSG00000116809.7	-0.0348503	0.292931	328	0.10003
ZBTB17_3p_chr1_16272811_16272210_ENSG00000116809.7	0.0147656	0.160922	328	0.10003
ZBTB17_3p_chr1_16271697_16271432_ENSG00000116809.7	0.00485414	0.117174	328	0.10003
ZBTB17_3p_chr1_16271334_16271192_ENSG00000116809.7	-0.0370864	0.311201	327	0.10003
ZBTB17_3p_chr1_16271095_16270094_ENSG00000116809.7	0.0126198	0.151125	328	0.10003
ZBTB17_3p_chr1_16270014_16269559_ENSG00000116809.7	-0.00773193	0.128795	328	0.10003
ZBTB17_3p_chr1_16269233_16268826_ENSG00000116809.7	-0.041708	0.352114	328	0.10003
HSPB7_3p_chr1_16345285_16344082_ENSG00000173641.13	-0.686815	0.991976	28	0.338675
HSPB7_3p_chr1_16343717_16343569_ENSG00000173641.13	-0.230856	0.426306	29	0.101895
RP11-5P18.10_3p_chr1_16362841_16362731_ENSG00000232456.1	-0.10898	0.492771	113	0.104287
CLCNKB_5p_chr1_16377011_16377095_ENSG00000184908.13	-0.229966	0.577893	54	0.108178
CLCNKB_5p_chr1_16377370_16377543_ENSG00000184908.13	-0.16962	0.393183	50	0.101047
CLCNKB_5p_chr1_16377973_16378042_ENSG00000184908.13	-0.00419989	0.103598	44	0.10003
CLCNKB_5p_chr1_16378205_16378315_ENSG00000184908.13	0.035075	0.132602	38	0.10003
CLCNKB_5p_chr1_16380134_16380267_ENSG00000184908.13	-0.195693	0.438436	46	0.102201
CLCNKB_5p_chr1_16382170_16382253_ENSG00000184908.13	-0.18192	0.392561	43	0.101047
FAM131C_3p_chr1_16400127_16399916_ENSG00000185519.8	-0.16968	0.673953	86	0.113827
FAM131C_3p_chr1_16390131_16390016_ENSG00000185519.8	0.0341964	0.203869	166	0.10003
FAM131C_3p_chr1_16389029_16388994_ENSG00000185519.8	0.0192248	0.152231	171	0.10003
FAM131C_3p_chr1_16388687_16388594_ENSG00000185519.8	-0.00669377	0.114878	146	0.10003
FAM131C_3p_chr1_16386546_16386364_ENSG00000185519.8	0.0122192	0.127594	146	0.10003
FAM131C_3p_chr1_16386099_16385989_ENSG00000185519.8	-0.0271025	0.161045	124	0.10003
EPHA2_3p_chr1_16482582_16482343_ENSG00000142627.9	-0.0738999	0.499509	284	0.104661
EPHA2_3p_chr1_16477458_16477391_ENSG00000142627.9	0.0154768	0.149303	294	0.10003
EPHA2_3p_chr1_16475542_16474873_ENSG00000142627.9	0.0206408	0.165651	289	0.10003
EPHA2_3p_chr1_16464925_16464770_ENSG00000142627.9	0.029743	0.198433	292	0.10003
EPHA2_3p_chr1_16464680_16464348_ENSG00000142627.9	0.0472672	0.300676	294	0.10003
EPHA2_3p_chr1_16462265_16462150_ENSG00000142627.9	0.0112586	0.133066	293	0.10003
EPHA2_3p_chr1_16461684_16461531_ENSG00000142627.9	0.0250658	0.18869	295	0.10003
EPHA2_3p_chr1_16461062_16460963_ENSG00000142627.9	-0.00537314	0.114972	292	0.10003
EPHA2_3p_chr1_16460410_16460355_ENSG00000142627.9	-0.0165045	0.153084	300	0.10003
EPHA2_3p_chr1_16460101_16459976_ENSG00000142627.9	0.0265865	0.208257	309	0.10003
EPHA2_3p_chr1_16458934_16458873_ENSG00000142627.9	-0.0145376	0.143992	298	0.10003
EPHA2_3p_chr1_16458768_16458559_ENSG00000142627.9	0.0234489	0.176712	289	0.10003
EPHA2_3p_chr1_16458365_16458216_ENSG00000142627.9	0.0390906	0.261204	299	0.10003
EPHA2_3p_chr1_16456914_16456721_ENSG00000142627.9	0.0175846	0.153296	295	0.10003
EPHA2_3p_chr1_16456084_16455929_ENSG00000142627.9	0.00863112	0.122217	294	0.10003
RP11-276H7.2_5p_chr1_16483466_16483824_ENSG00000227959.1	0.00207174	0.10354	110	0.10003
RP11-276H7.3_5p_chr1_16487996_16488378_ENSG00000224621.1	-0.0667245	0.293444	120	0.10003
ARHGEF19_3p_chr1_16539104_16538997_ENSG00000142632.12	-0.174574	0.828265	126	0.136027
ARHGEF19_3p_chr1_16535578_16535138_ENSG00000142632.12	-0.180367	0.8549	128	0.144195
ARHGEF19_3p_chr1_16534720_16534439_ENSG00000142632.12	-0.142558	0.747461	144	0.121343
ARHGEF19_3p_chr1_16534272_16534170_ENSG00000142632.12	-0.167986	0.824966	141	0.135503
ARHGEF19_3p_chr1_16534093_16534017_ENSG00000142632.12	-0.098107	0.619341	180	0.110094
ARHGEF19_3p_chr1_16533705_16533443_ENSG00000142632.12	-0.0366815	0.29283	295	0.10003
ARHGEF19_3p_chr1_16533038_16532675_ENSG00000142632.12	-0.0714637	0.620446	319	0.110194
ARHGEF19_3p_chr1_16532578_16532033_ENSG00000142632.12	-0.14235	0.972245	318	0.237381
ARHGEF19_3p_chr1_16531920_16531846_ENSG00000142632.12	-0.0487122	0.405809	318	0.101339
ARHGEF19_3p_chr1_16531671_16531582_ENSG00000142632.12	-0.0487823	0.408867	319	0.10144
ARHGEF19_3p_chr1_16531414_16531254_ENSG00000142632.12	-0.0429968	0.3584	319	0.100118
ARHGEF19_3p_chr1_16529069_16528911_ENSG00000142632.12	-0.0539863	0.455148	318	0.102697
ARHGEF19_3p_chr1_16528356_16528277_ENSG00000142632.12	-0.0615135	0.523579	316	0.105589
ARHGEF19_3p_chr1_16525749_16525645_ENSG00000142632.12	-0.0293749	0.246924	314	0.10003
ANO7P1_3p_chr1_16543823_16543622_ENSG00000237276.4	0.0302732	0.194521	175	0.10003
RSG1_3p_chr1_16563657_16563126_ENSG00000132881.7	0.0132884	0.151123	303	0.10003
RSG1_3p_chr1_16560259_16560107_ENSG00000132881.7	-0.0246082	0.216349	320	0.10003
RSG1_3p_chr1_16559512_16559388_ENSG00000132881.7	-0.0834092	0.70911	323	0.116985
RSG1_3p_chr1_16559141_16559005_ENSG00000132881.7	-0.0800962	0.672674	299	0.11371
FBXO42_3p_chr1_16678949_16678750_ENSG00000037637.6	0.00926893	0.134879	327	0.10003
FBXO42_3p_chr1_16641930_16641664_ENSG00000037637.6	-0.0319596	0.270617	328	0.10003
FBXO42_3p_chr1_16632414_16632298_ENSG00000037637.6	-0.0455048	0.382565	327	0.100595
FBXO42_3p_chr1_16583254_16583101_ENSG00000037637.6	-0.0356282	0.300197	327	0.10003
FBXO42_3p_chr1_16582316_16582206_ENSG00000037637.6	-0.0349399	0.294001	328	0.10003
FBXO42_3p_chr1_16580226_16580130_ENSG00000037637.6	-0.0330539	0.27769	327	0.10003
FBXO42_3p_chr1_16580088_16580051_ENSG00000037637.6	0.014886	0.160844	327	0.10003
FBXO42_3p_chr1_16579922_16579591_ENSG00000037637.6	-0.0228738	0.207407	327	0.10003
FBXO42_3p_chr1_16578899_16578783_ENSG00000037637.6	-0.0295513	0.25467	328	0.10003
SZRD1_5p_chr1_16717870_16717919_ENSG00000055070.12	-0.0159689	0.163563	328	0.10003
SZRD1_5p_chr1_16719723_16719977_ENSG00000055070.12	-0.095308	0.801017	328	0.130029
SZRD1_5p_chr1_16721533_16722175_ENSG00000055070.12	-0.0229792	0.209509	328	0.10003
NECAP2_5p_chr1_16767661_16768114_ENSG00000157191.15	-0.0391935	0.309477	328	0.10003
NECAP2_5p_chr1_16770127_16770227_ENSG00000157191.15	-0.0292201	0.252117	328	0.10003
NECAP2_5p_chr1_16774365_16774469_ENSG00000157191.15	-0.020142	0.191996	328	0.10003
NECAP2_5p_chr1_16774555_16774636_ENSG00000157191.15	-0.0299123	0.256914	328	0.10003
NECAP2_5p_chr1_16775588_16775696_ENSG00000157191.15	-0.0311952	0.26658	328	0.10003
NECAP2_5p_chr1_16776620_16776736_ENSG00000157191.15	0.0166362	0.169128	328	0.10003
NECAP2_5p_chr1_16778333_16778510_ENSG00000157191.15	-0.0288201	0.249312	328	0.10003
NECAP2_5p_chr1_16782313_16782388_ENSG00000157191.15	-0.0141765	0.158435	328	0.10003
NECAP2_5p_chr1_16785337_16786573_ENSG00000157191.15	-0.0275947	0.239968	328	0.10003
CROCCP3_3p_chr1_16825752_16825698_ENSG00000080947.10	0.118917	0.897192	313	0.162669
CROCCP3_3p_chr1_16819196_16818476_ENSG00000080947.10	-0.0388769	0.29991	314	0.10003
CROCCP3_3p_chr1_16817811_16817505_ENSG00000080947.10	-0.0558026	0.443206	315	0.102346
CROCCP3_3p_chr1_16817421_16817360_ENSG00000080947.10	0.0312955	0.246963	319	0.10003
CROCCP3_3p_chr1_16817278_16817113_ENSG00000080947.10	0.0363051	0.27933	316	0.10003
CROCCP3_3p_chr1_16813156_16812921_ENSG00000080947.10	0.0971083	0.720288	274	0.118289
CROCCP3_3p_chr1_16812160_16812064_ENSG00000080947.10	0.076305	0.552189	270	0.106851
CROCCP3_3p_chr1_16811401_16811318_ENSG00000080947.10	0.0715801	0.502378	247	0.104769
CROCCP3_3p_chr1_16810959_16810728_ENSG00000080947.10	0.0726766	0.489981	239	0.104235
CROCCP3_3p_chr1_16809981_16809782_ENSG00000080947.10	0.02352	0.18	248	0.10003
CROCCP3_3p_chr1_16804932_16804750_ENSG00000080947.10	0.0186255	0.16527	269	0.10003
CROCCP3_3p_chr1_16803569_16803425_ENSG00000080947.10	0.00895676	0.127347	246	0.10003
CROCCP3_3p_chr1_16802999_16802894_ENSG00000080947.10	0.0383969	0.286774	272	0.10003
CROCCP3_3p_chr1_16802557_16802320_ENSG00000080947.10	0.124728	0.508401	106	0.105087
RP4-798A10.4_5p_chr1_16848059_16848291_ENSG00000224174.2	-0.0355527	0.277916	278	0.10003
RP5-875O13.6_3p_chr1_16877724_16877196_ENSG00000225710.1	-0.0598288	0.459399	279	0.102814
NBPF1_3p_chr1_16940057_16939833_ENSG00000219481.6	0.0305537	0.236177	327	0.10003
NBPF1_3p_chr1_16935274_16935003_ENSG00000219481.6	0.0421489	0.317054	326	0.10003
NBPF1_3p_chr1_16921508_16921426_ENSG00000219481.6	-0.00655071	0.121643	327	0.10003
NBPF1_3p_chr1_16921156_16921087_ENSG00000219481.6	0.0193797	0.177499	326	0.10003
NBPF1_3p_chr1_16920248_16919936_ENSG00000219481.6	0.0664211	0.534553	325	0.106032
NBPF1_3p_chr1_16918808_16918654_ENSG00000219481.6	0.0176649	0.168533	326	0.10003
NBPF1_3p_chr1_16918551_16918342_ENSG00000219481.6	0.0593013	0.467043	325	0.103307
NBPF1_3p_chr1_16916496_16916394_ENSG00000219481.6	0.074425	0.618152	316	0.11007
NBPF1_3p_chr1_16915558_16915344_ENSG00000219481.6	0.110229	0.87142	319	0.149776
NBPF1_3p_chr1_16914292_16914220_ENSG00000219481.6	0.0857295	0.724117	322	0.118692
NBPF1_3p_chr1_16913756_16913545_ENSG00000219481.6	0.0980168	0.794479	325	0.128686
NBPF1_3p_chr1_16912193_16911984_ENSG00000219481.6	0.0814308	0.663093	328	0.112624
NBPF1_3p_chr1_16910191_16910089_ENSG00000219481.6	0.0371058	0.300209	319	0.10003
NBPF1_3p_chr1_16909253_16909039_ENSG00000219481.6	0.0417259	0.327822	315	0.10003
NBPF1_3p_chr1_16907987_16907915_ENSG00000219481.6	0.0474176	0.385163	321	0.100769
NBPF1_3p_chr1_16907451_16907240_ENSG00000219481.6	0.0511589	0.400975	324	0.101314
NBPF1_3p_chr1_16905897_16905688_ENSG00000219481.6	0.0957293	0.791809	318	0.128155
NBPF1_3p_chr1_16903914_16903812_ENSG00000219481.6	0.0943784	0.784264	315	0.126655
NBPF1_3p_chr1_16902976_16902762_ENSG00000219481.6	0.0559012	0.4445	325	0.102346
NBPF1_3p_chr1_16901724_16901652_ENSG00000219481.6	0.0569398	0.451636	327	0.102631
NBPF1_3p_chr1_16901187_16900982_ENSG00000219481.6	0.0728271	0.58882	324	0.108511
NBPF1_3p_chr1_16899688_16899637_ENSG00000219481.6	0.0626731	0.511409	326	0.105256
NBPF1_3p_chr1_16895731_16895568_ENSG00000219481.6	0.0621578	0.487594	327	0.104177
NBPF1_3p_chr1_16894525_16894474_ENSG00000219481.6	0.0308429	0.246031	328	0.10003
NBPF1_3p_chr1_16893846_16893674_ENSG00000219481.6	0.0329082	0.259338	328	0.10003
NBPF1_3p_chr1_16892954_16892903_ENSG00000219481.6	0.0298427	0.237346	328	0.10003
NBPF1_3p_chr1_16892300_16892128_ENSG00000219481.6	0.0267992	0.221671	328	0.10003
NBPF1_3p_chr1_16891413_16891302_ENSG00000219481.6	0.0256391	0.208157	327	0.10003
CROCCP2_3p_chr1_16959841_16959784_ENSG00000215908.5	-0.0966447	0.600379	176	0.109002
CROCCP2_3p_chr1_16957604_16957385_ENSG00000215908.5	0.0335308	0.280001	327	0.10003
CROCCP2_3p_chr1_16955145_16954963_ENSG00000215908.5	0.0398297	0.331867	327	0.10003
CROCCP2_3p_chr1_16953784_16953640_ENSG00000215908.5	0.0359364	0.298704	328	0.10003
CROCCP2_3p_chr1_16952994_16952848_ENSG00000215908.5	0.0465684	0.375837	327	0.100426
CROCCP2_3p_chr1_16952500_16952270_ENSG00000215908.5	0.0619222	0.538422	327	0.106302
MST1P2_5p_chr1_16972864_16973010_ENSG00000186301.7	0.10342	0.450608	104	0.102631
MST1P2_5p_chr1_16973092_16973204_ENSG00000186301.7	0.0526061	0.334705	217	0.10003
MST1P2_5p_chr1_16973282_16973396_ENSG00000186301.7	0.0659154	0.40952	183	0.10144
MST1P2_5p_chr1_16973475_16973611_ENSG00000186301.7	0.0364404	0.236121	213	0.10003
MST1P2_5p_chr1_16973693_16973813_ENSG00000186301.7	0.0920593	0.571666	204	0.107735
MST1P2_5p_chr1_16973958_16974076_ENSG00000186301.7	0.0697253	0.431103	201	0.101972
MST1P2_5p_chr1_16974279_16974896_ENSG00000186301.7	0.0898659	0.448558	139	0.102508
MST1P2_5p_chr1_16974927_16975159_ENSG00000186301.7	0.072761	0.239892	53	0.10003
MST1P2_5p_chr1_16975251_16975287_ENSG00000186301.7	0.0854439	0.465353	154	0.103171
MST1P2_5p_chr1_16975669_16975746_ENSG00000186301.7	0.224591	0.797257	73	0.129389
MST1P2_5p_chr1_16975874_16976020_ENSG00000186301.7	0.117496	0.430791	85	0.101967
MST1P2_5p_chr1_16976102_16976208_ENSG00000186301.7	0.0870218	0.417789	140	0.101772
MST1P2_5p_chr1_16976305_16976444_ENSG00000186301.7	0.0256952	0.170596	162	0.10003
MST1P2_5p_chr1_16976569_16976914_ENSG00000186301.7	0.0127194	0.12597	137	0.10003
ESPNP_3p_chr1_17026515_17026354_ENSG00000268869.1	-0.183835	0.465994	46	0.10321
ESPNP_3p_chr1_17026116_17025921_ENSG00000268869.1	-0.292344	0.79619	51	0.129134
ESPNP_3p_chr1_17023419_17023274_ENSG00000268869.1	-0.229269	0.92848	103	0.183303
ESPNP_3p_chr1_17023189_17022926_ENSG00000268869.1	0.0282937	0.157191	94	0.10003
ESPNP_3p_chr1_17018804_17018600_ENSG00000268869.1	0.0510886	0.220139	91	0.10003
ESPNP_3p_chr1_17017789_17017608_ENSG00000268869.1	-0.215627	0.90675	106	0.167939
CROCC_5p_chr1_17249158_17249293_ENSG00000058453.12	0.111879	0.809996	269	0.131942
CROCC_5p_chr1_17250820_17250974_ENSG00000058453.12	0.0192289	0.172564	275	0.10003
CROCC_5p_chr1_17256341_17256526_ENSG00000058453.12	-0.0196236	0.174496	280	0.10003
CROCC_5p_chr1_17256619_17256702_ENSG00000058453.12	-0.0128012	0.14594	285	0.10003
CROCC_5p_chr1_17256781_17256842_ENSG00000058453.12	-0.0576347	0.462898	297	0.103052
CROCC_5p_chr1_17256924_17257089_ENSG00000058453.12	-0.0588108	0.479964	307	0.103752
CROCC_5p_chr1_17257786_17257892_ENSG00000058453.12	-0.0371529	0.292466	298	0.10003
CROCC_5p_chr1_17263132_17263368_ENSG00000058453.12	-0.0473882	0.367451	291	0.100281
CROCC_5p_chr1_17264136_17264232_ENSG00000058453.12	-0.0399262	0.309958	298	0.10003
CROCC_5p_chr1_17264895_17264978_ENSG00000058453.12	0.0544767	0.435935	302	0.102084
CROCC_5p_chr1_17265404_17265637_ENSG00000058453.12	-0.0543572	0.417348	272	0.101769
CROCC_5p_chr1_17266389_17266588_ENSG00000058453.12	0.00666999	0.121056	259	0.10003
CROCC_5p_chr1_17267267_17267929_ENSG00000058453.12	-0.102771	0.814184	287	0.133105
CROCC_5p_chr1_17270595_17270777_ENSG00000058453.12	-0.0142272	0.153535	287	0.10003
CROCC_5p_chr1_17271957_17272101_ENSG00000058453.12	0.00721025	0.1252	305	0.10003
CROCC_5p_chr1_17272754_17272900_ENSG00000058453.12	0.00360043	0.112216	320	0.10003
CROCC_5p_chr1_17273256_17273486_ENSG00000058453.12	0.00390262	0.112224	278	0.10003
CROCC_5p_chr1_17274826_17275019_ENSG00000058453.12	0.00861793	0.130331	299	0.10003
CROCC_5p_chr1_17275294_17275421_ENSG00000058453.12	0.0571332	0.450995	295	0.102631
CROCC_5p_chr1_17277448_17277833_ENSG00000058453.12	0.0601151	0.471146	286	0.103469
CROCC_5p_chr1_17278408_17278450_ENSG00000058453.12	0.0701167	0.547837	278	0.106683
CROCC_5p_chr1_17279575_17279710_ENSG00000058453.12	0.0993977	0.783662	273	0.126557
CROCC_5p_chr1_17279797_17279976_ENSG00000058453.12	0.113611	0.856056	273	0.14461
CROCC_5p_chr1_17280718_17280857_ENSG00000058453.12	0.00608892	0.12092	306	0.10003
CROCC_5p_chr1_17281229_17281372_ENSG00000058453.12	0.0701187	0.589039	303	0.108523
CROCC_5p_chr1_17281807_17282045_ENSG00000058453.12	0.00659893	0.12266	304	0.10003
CROCC_5p_chr1_17282492_17282651_ENSG00000058453.12	0.0846624	0.712357	315	0.117331
CROCC_5p_chr1_17285078_17285245_ENSG00000058453.12	0.0621451	0.509403	310	0.105113
CROCC_5p_chr1_17287253_17287625_ENSG00000058453.12	-0.037552	0.297529	306	0.10003
CROCC_5p_chr1_17292218_17292387_ENSG00000058453.12	0.0108147	0.134399	244	0.10003
CROCC_5p_chr1_17292494_17292614_ENSG00000058453.12	0.0119022	0.145038	316	0.10003
CROCC_5p_chr1_17292903_17293066_ENSG00000058453.12	0.0166073	0.170132	325	0.10003
CROCC_5p_chr1_17294698_17294913_ENSG00000058453.12	-0.0389406	0.319132	326	0.10003
CROCC_5p_chr1_17295611_17295835_ENSG00000058453.12	0.00706075	0.124942	326	0.10003
CROCC_5p_chr1_17296280_17296429_ENSG00000058453.12	0.0242462	0.207561	323	0.10003
CROCC_5p_chr1_17296748_17296948_ENSG00000058453.12	0.0153712	0.162889	327	0.10003
CROCC_5p_chr1_17297131_17297462_ENSG00000058453.12	0.0405679	0.338737	327	0.10003
CROCC_5p_chr1_17297960_17298142_ENSG00000058453.12	-0.00413916	0.113445	325	0.10003
CROCC_5p_chr1_17298855_17299474_ENSG00000058453.12	0.0202532	0.186541	324	0.10003
CROCCP4_5p_chr1_17077009_17077089_ENSG00000227684.1	-0.46129	0.83419	28	0.137569
CROCCP4_5p_chr1_17077168_17077227_ENSG00000227684.1	-0.289752	0.722257	39	0.11851
MST1L_3p_chr1_17087597_17087450_ENSG00000186715.6	-0.216394	0.557945	55	0.106984
MST1L_3p_chr1_17087178_17087064_ENSG00000186715.6	-0.26303	0.308254	33	0.10003
MST1L_3p_chr1_17085530_17085298_ENSG00000186715.6	-0.103069	0.465641	117	0.103178
MST1L_3p_chr1_17085206_17085170_ENSG00000186715.6	-0.0365866	0.187259	119	0.10003
MST1L_3p_chr1_17085081_17084437_ENSG00000186715.6	-0.0728965	0.418631	175	0.101808
MST1L_3p_chr1_17084355_17084249_ENSG00000186715.6	-0.0683258	0.439395	209	0.102201
MST1L_3p_chr1_17084152_17084013_ENSG00000186715.6	-0.0744859	0.290035	97	0.10003
MFAP2_3p_chr1_17307330_17307082_ENSG00000117122.9	-0.0414591	0.248992	221	0.10003
MFAP2_3p_chr1_17304809_17303203_ENSG00000117122.9	0.0456011	0.321196	231	0.10003
MFAP2_3p_chr1_17302225_17302138_ENSG00000117122.9	0.0261476	0.198976	221	0.10003
MFAP2_3p_chr1_17301837_17301764_ENSG00000117122.9	-0.00108025	0.102966	218	0.10003
ATP13A2_3p_chr1_17338423_17338224_ENSG00000159363.13	0.0220494	0.201379	319	0.10003
ATP13A2_3p_chr1_17332273_17332179_ENSG00000159363.13	0.0287548	0.246908	325	0.10003
ATP13A2_3p_chr1_17332051_17331869_ENSG00000159363.13	0.00505656	0.118239	328	0.10003
ATP13A2_3p_chr1_17330906_17330827_ENSG00000159363.13	-0.0102873	0.138049	328	0.10003
ATP13A2_3p_chr1_17328868_17328791_ENSG00000159363.13	0.00639183	0.122909	328	0.10003
ATP13A2_3p_chr1_17328598_17328529_ENSG00000159363.13	-0.002169	0.107132	328	0.10003
ATP13A2_3p_chr1_17327029_17326895_ENSG00000159363.13	-0.0503024	0.38916	328	0.100874
ATP13A2_3p_chr1_17326807_17326741_ENSG00000159363.13	-0.0266008	0.226743	328	0.10003
ATP13A2_3p_chr1_17326637_17326506_ENSG00000159363.13	-0.0947631	0.736901	327	0.119935
ATP13A2_3p_chr1_17323670_17323515_ENSG00000159363.13	-0.0358091	0.274966	328	0.10003
ATP13A2_3p_chr1_17322991_17322881_ENSG00000159363.13	-0.0648314	0.550497	328	0.106841
ATP13A2_3p_chr1_17322795_17322749_ENSG00000159363.13	-0.035051	0.259527	328	0.10003
ATP13A2_3p_chr1_17320330_17320124_ENSG00000159363.13	0.0420322	0.351863	328	0.10003
ATP13A2_3p_chr1_17319076_17318981_ENSG00000159363.13	-0.00529012	0.116264	328	0.10003
ATP13A2_3p_chr1_17318897_17318738_ENSG00000159363.13	0.047277	0.373107	328	0.100341
ATP13A2_3p_chr1_17318624_17318504_ENSG00000159363.13	0.0418336	0.3233	328	0.10003
ATP13A2_3p_chr1_17318353_17318229_ENSG00000159363.13	-0.00904184	0.128324	327	0.10003
ATP13A2_3p_chr1_17316782_17316622_ENSG00000159363.13	-0.00479909	0.114767	328	0.10003
ATP13A2_3p_chr1_17316498_17316382_ENSG00000159363.13	-0.00904802	0.132964	328	0.10003
ATP13A2_3p_chr1_17316265_17316186_ENSG00000159363.13	-0.020322	0.181717	328	0.10003
ATP13A2_3p_chr1_17314969_17314817_ENSG00000159363.13	-0.0554715	0.414804	328	0.10157
ATP13A2_3p_chr1_17314729_17314633_ENSG00000159363.13	-0.0382405	0.284621	328	0.10003
ATP13A2_3p_chr1_17313764_17313541_ENSG00000159363.13	0.00550924	0.117111	328	0.10003
ATP13A2_3p_chr1_17313451_17313300_ENSG00000159363.13	-0.027476	0.207748	328	0.10003
ATP13A2_3p_chr1_17313127_17312958_ENSG00000159363.13	-0.0380612	0.308214	328	0.10003
PADI2_3p_chr1_17445948_17445775_ENSG00000117115.8	-0.116513	0.543	128	0.106406
PADI2_3p_chr1_17431556_17431373_ENSG00000117115.8	-0.085959	0.424404	130	0.101871
PADI2_3p_chr1_17429554_17429482_ENSG00000117115.8	-0.161572	0.808823	133	0.131907
PADI2_3p_chr1_17422465_17422404_ENSG00000117115.8	-0.144054	0.776767	144	0.125371
PADI2_3p_chr1_17420179_17420062_ENSG00000117115.8	-0.16968	0.842009	135	0.140229
PADI2_3p_chr1_17419028_17418903_ENSG00000117115.8	-0.128434	0.679664	131	0.114147
PADI2_3p_chr1_17413194_17413016_ENSG00000117115.8	-0.133922	0.71466	141	0.117578
PADI2_3p_chr1_17411197_17411094_ENSG00000117115.8	-0.133052	0.696791	127	0.115565
PADI2_3p_chr1_17410332_17410221_ENSG00000117115.8	-0.0866071	0.428702	138	0.101967
PADI2_3p_chr1_17409633_17409040_ENSG00000117115.8	-0.1461	0.694276	141	0.115363
PADI2_3p_chr1_17402318_17401351_ENSG00000117115.8	-0.0741497	0.361352	131	0.100211
PADI2_3p_chr1_17397986_17397901_ENSG00000117115.8	-0.094374	0.502517	146	0.104769
PADI2_3p_chr1_17396711_17396583_ENSG00000117115.8	-0.127531	0.71551	153	0.117587
RP11-380J14.1_5p_chr1_17519460_17519660_ENSG00000204362.5	-0.403032	0.961847	59	0.217928
RP11-380J14.1_5p_chr1_17519786_17524112_ENSG00000204362.5	0.308059	0.841306	51	0.139845
PADI1_5p_chr1_17548785_17548965_ENSG00000142623.8	-0.211183	0.766374	73	0.123522
PADI1_5p_chr1_17550862_17550923_ENSG00000142623.8	-0.0734396	0.247153	70	0.10003
PADI1_5p_chr1_17552306_17552423_ENSG00000142623.8	-0.0908069	0.297673	68	0.10003
PADI1_5p_chr1_17552528_17552653_ENSG00000142623.8	-0.0378237	0.166127	72	0.10003
PADI1_5p_chr1_17555120_17555292_ENSG00000142623.8	-0.233727	0.810699	71	0.132046
PADI1_5p_chr1_17555443_17555546_ENSG00000142623.8	-0.223844	0.790273	70	0.127781
PADI1_5p_chr1_17556580_17556703_ENSG00000142623.8	0.00266419	0.103654	68	0.10003
PADI1_5p_chr1_17557067_17557174_ENSG00000142623.8	-0.0827773	0.290052	70	0.10003
PADI1_5p_chr1_17559314_17559465_ENSG00000142623.8	-0.0165142	0.12339	61	0.10003
PADI1_5p_chr1_17563809_17563953_ENSG00000142623.8	-0.0112938	0.117883	90	0.10003
[truncated: 307,762+ more rows]

## Sheet: Merged_TC_vs_tss_1kb
Supplementary Table S2d: Merged TC vs. TSS methylation (prior 1kb)
Correlations of merged log2 z-scored CCLE WGS + GDSC WES TC and TSS prior 1kb region methylation
locus_id	coef	P_value	Sample_size	Q_value
SGIP1_1_66998638_66999638	0.112203	0.707689	216	0.233292
SGIP1_1_66998251_66999251	0.0518144	0.203782	76	0.117187
AZIN2_1_33545713_33546713	0.0763473	0.60193	290	0.195945
AZIN2_1_33546778_33547778	0.072941	0.594761	290	0.193989
AGBL4_1_50489626_50490626	0.136769	0.910548	288	0.375384
NECAP2_1_16766166_16767166	-0.0200942	0.183116	282	0.113363
CLIC4_1_25070759_25071759	0.008229	0.128544	290	0.104919
SLC45A1_1_8377144_8378144	-0.0177469	0.170308	278	0.111539
TGFBR3_1_92351836_92352836	0.0614583	0.462709	287	0.161251
COP1_1_176176380_176177380	-0.0195487	0.178722	288	0.112665
PRUNE1_1_150979866_150980866	0.0662387	0.495443	223	0.168713
C1orf21_1_184355149_184356149	-0.037446	0.276375	290	0.129122
LIN9_1_226497204_226498204	0.0356331	0.279167	289	0.129552
LIN9_1_226497449_226498449	-0.048502	0.252863	134	0.125328
LIN9_1_226496865_226497865	0.03245	0.259778	289	0.126385
PRKCZ_1_1980908_1981908	0.303752	0.999833	288	0.922873
PRKCZ_1_2003900_2004900	-0.120432	0.78676	284	0.26698
PRKCZ_1_2004424_2005424	-0.179071	0.939845	290	0.424378
PRDM16_1_2984741_2985741	-0.0207582	0.176874	290	0.112424
ICMT_1_6296044_6297044	0.00776266	0.125784	289	0.104626
CAMTA1_1_6844383_6845383	0.120627	0.903586	291	0.366464
C1orf159_1_1051736_1052736	0.0193501	0.174253	291	0.112134
KAZN-AS1_1_14746469_14747469	-0.122255	0.879416	287	0.33865
EPHB2_1_23036330_23037330	-0.000604691	0.101737	291	0.100416
LOC105378614_1_19923326_19924326	0.0269306	0.224971	290	0.120158
USP48_1_22109692_22110692	-0.0408311	0.329323	288	0.135447
PINK1_1_20958947_20959947	0.0783846	0.591872	285	0.192934
PINK1-AS_1_20978686_20979686	-0.00139554	0.104385	285	0.100857
STMN1_1_26232993_26233993	0.0593484	0.453386	291	0.159096
EYA3_1_28415148_28416148	0.0956267	0.778095	285	0.262501
PUM1_1_31538564_31539564	-0.0470176	0.359489	282	0.141024
EPB41_1_29212602_29213602	0.0957723	0.774951	289	0.260864
EPB41_1_29240087_29241087	-0.0776308	0.666425	288	0.216119
NUDC_1_27247212_27248212	0.0339297	0.259324	278	0.126357
THRAP3_1_36689012_36690012	-0.0837427	0.696199	287	0.228765
CSMD2_1_34630875_34631875	-0.0168289	0.154486	250	0.108821
CSMD2_1_34631443_34632443	0.0767561	0.601002	285	0.195945
PTPRF_1_43995530_43996530	0.0225223	0.177854	287	0.112526
RNF220_1_44888495_44889495	0.136938	0.93771	277	0.422086
CCDC30_1_42928386_42929386	0.040888	0.296928	290	0.131759
CCDC30_1_42928024_42929024	0.0251817	0.203002	290	0.117075
GPBP1L1_1_46152302_46153302	0.0821971	0.682129	291	0.223487
CCDC30_1_42920740_42921740	-0.0368661	0.278921	289	0.129552
TRABD2B_1_48462562_48463562	0.0491423	0.351043	285	0.139372
SCP2_1_53391900_53392900	0.0311531	0.248983	281	0.124768
FAF1_1_51425936_51426936	0.0633576	0.493614	256	0.168159
TCEANC2_1_54518244_54519244	0.138132	0.961073	291	0.481462
RAB3B_1_52456436_52457436	0.0191607	0.171445	284	0.111762
USP24_1_55681039_55682039	0.0717451	0.603443	288	0.196106
DAB1_1_57888784_57889784	0.024395	0.188614	281	0.114238
DAB1_1_57889732_57890732	0.0699551	0.452997	235	0.159041
LEPR_1_65990371_65991371	0.0978568	0.680895	251	0.222827
ITGB3BP_1_63988944_63989944	0.0362659	0.288924	287	0.130811
CACHD1_1_64970596_64971596	0.0127525	0.144579	287	0.107296
USP1_1_62901382_62902382	0.0573177	0.465935	291	0.161827
FGGY_1_59761309_59762309	0.102581	0.768725	287	0.25867
FGGY_1_59761624_59762624	0.106158	0.77604	288	0.261572
LEPR_1_65885334_65886334	0.117728	0.895169	284	0.356625
NFIA_1_61546979_61547979	0.1008	0.638681	290	0.207618
CACHD1_1_64934811_64935811	0.0589564	0.473146	288	0.163678
FGGY_1_59761683_59762683	-0.0155557	0.163341	289	0.110274
NFIA_1_61546533_61547533	0.0439207	0.312505	291	0.133289
NFIA_1_61541945_61542945	-0.00167613	0.105157	289	0.100991
USP1_1_62900974_62901974	0.0985363	0.805585	291	0.278118
LRRC7_1_70033436_70034436	0.0455682	0.296133	280	0.131759
NEGR1_1_72748277_72749277	-0.0531975	0.384779	288	0.145336
PIGK_1_77685132_77686132	-0.0148741	0.158779	284	0.109562
LRRC8C_1_90097643_90098643	-0.0637475	0.48561	273	0.166526
PKN2-AS1_1_89150887_89151887	-0.0594777	0.477218	291	0.165025
DIPK1A_1_93427079_93428079	0.0246527	0.198356	287	0.116289
GCLM_1_94375154_94376154	0.0776574	0.633484	290	0.205411
LOC729970_1_95392583_95393583	-0.0429943	0.302924	291	0.132482
NTNG1_1_107681539_107682539	0.0506979	0.383424	291	0.145157
NTNG1_1_107682213_107683213	0.0419837	0.292186	289	0.131018
RAP1A_1_112161404_112162404	0.139625	0.957981	284	0.471145
RHOC_1_113250025_113251025	0.00424594	0.114181	287	0.102633
PHTF1_1_114301777_114302777	0.0349922	0.277446	287	0.129332
GNAI3_1_110090185_110091185	0.0892601	0.702155	287	0.231292
RAP1A_1_112161768_112162768	-0.103774	0.835279	291	0.298353
RHOC_1_113249678_113250678	0.0888046	0.738672	289	0.24617
WDR3_1_118471371_118472371	0.0502493	0.399856	291	0.148042
OTUD7B_1_149982686_149983686	0.0219927	0.151055	136	0.108283
SMG5_1_156252681_156253681	0.101968	0.776803	285	0.261831
TPM3_1_154155725_154156725	0.0476848	0.375445	289	0.143754
SMG5_1_156261289_156262289	-0.0611962	0.418395	286	0.150772
TPM3_1_154155694_154156694	0.075029	0.602081	289	0.195945
FCGR2A_1_161474204_161475204	0.0525988	0.332576	244	0.136113
PBX1_1_164527596_164528596	0.0217753	0.191744	285	0.11495
LOC440700_1_165666986_165667986	0.00838329	0.129997	290	0.105275
PBX1_1_164527958_164528958	0.0817188	0.67353	287	0.21939
DNM3_1_171809617_171810617	-0.0893845	0.619992	290	0.200792
SOAT1_1_179261848_179262848	0.0137937	0.148706	265	0.107863
BRINP2_1_177139523_177140523	0.0538025	0.352256	286	0.13972
SMG7_1_183440505_183441505	0.0786675	0.649926	290	0.210779
RASAL2_1_178061863_178062863	-0.0246574	0.178376	287	0.112534
PTGS2_1_186649559_186650559	-0.0428829	0.310734	282	0.133084
ZBTB41_1_197169672_197170672	0.0685108	0.570311	291	0.186726
NEK7_1_198125107_198126107	0.0461774	0.37655	288	0.143888
PPP1R12B_1_202316829_202317829	-0.0227987	0.196069	289	0.115846
BATF3_1_212873327_212874327	0.046416	0.343151	290	0.137747
HHAT_1_210501249_210502249	-0.0123373	0.138677	284	0.106338
ESRRG_1_217311097_217312097	0.0217674	0.185767	274	0.113645
ESRRG_1_217262987_217263987	0.0912414	0.718651	291	0.236952
ESRRG_1_217263196_217264196	0.0606075	0.471237	291	0.163206
ESRRG_1_217263889_217264889	0.0733821	0.595018	285	0.19403
HHAT_1_210501639_210502639	-0.0240074	0.198677	291	0.116354
EPRS_1_220220000_220221000	-0.0389425	0.308414	285	0.133021
DNAH14_1_225116355_225117355	-0.114265	0.787854	262	0.267766
TSNAX-DISC1_1_231663398_231664398	-0.08549	0.681821	258	0.223243
[truncated: 21,227 more rows]

## Sheet: Merged_TC_vs_tss_cluster
Supplementary Table S2e: Merged TC vs. TSS methylation (CpG clusters)
[truncated: 56,143 more rows]

[truncated: 10 more sheets: Merged_TC_vs_CGI, Merged_TC_vs_rppa_protein, Merged_TC_vs_RPPA_ms_protein, Merged_TC_vs_histone_profiles, Merged_TC_vs_Avana, Merged_TC_vs_DRIVE, Merged_TC_vs_Achilles, TERC_coexpression, CCLE WGS linear model results, GDSC WES linear model results]
