# Supplementary material for: Integrated evaluation of telomerase activation and telomere maintenance across cancer cell lines
Source: eLife. 2021 Sep 6;10:e66198. doi: 10.7554/eLife.66198 (PMC8530513; doi:10.7554/eLife.66198)
Supplement: Supplementary file 3. [file elife-66198-supp3.xlsx]

## Sheet: TC_vs_dependencies
Supplementary Table S3a: TC estimates vs. dependency levels
Correlations between telomere content and genome-wide dependency screens
DepMap_gene_identifier	CCLE_WGS-Avana_pearson	CCLE_WGS-Avana_P_value	CCLE_WGS-Avana_Q_value	CCLE_WGS-Avana_sample_size	GDSC_WES-Avana_pearson	GDSC_WES-Avana_P_value	GDSC_WES-Avana_Q_value	GDSC_WES-Avana_sample_size	CCLE_WGS-DRIVE_pearson	CCLE_WGS-DRIVE_P_value	CCLE_WGS-DRIVE_Q_value	CCLE_WGS-DRIVE_sample_size	GDSC_WES-DRIVE_pearson	GDSC_WES-DRIVE_P_value	GDSC_WES-DRIVE_Q_value	GDSC_WES-DRIVE_sample_size	CCLE_WGS-Achilles_pearson	CCLE_WGS-Achilles_P_value	CCLE_WGS-Achilles_Q_value	CCLE_WGS-Achilles_sample_size	GDSC_WES-Achilles_pearson	GDSC_WES-Achilles_P_value	GDSC_WES-Achilles_Q_value	GDSC_WES-Achilles_sample_size
A1BG_1	-0.0676742	0.327923	0.999491	211	-0.0284256	0.558486	0.928028	426									-0.0967901	0.17166	0.769027	201	0.0103962	0.847646	0.945432	344
A1CF_29974	0.00285354	0.967133	0.999491	211	-0.00455822	0.925264	0.990275	426	0.0152977	0.838942	0.961536	179	0.0189887	0.750015	0.893942	284	0.0770375	0.277037	0.834817	201	0.100541	0.0625058	0.320518	344
A2ML1_144568	-0.034647	0.616767	0.999491	211	0.00291103	0.95223	0.994665	426									0.0162854	0.818511	0.975794	201	-0.0206282	0.703022	0.885982	344
A2M_2	-0.035899	0.604087	0.999491	211	-0.0348292	0.473391	0.908823	426									0.0586321	0.408362	0.884604	201	0.00811013	0.880863	0.957745	344
A3GALT2_127550	0.00184977	0.978691	0.999491	211	-0.0539756	0.266318	0.834392	426
A4GALT_53947	-0.00649158	0.925319	0.999491	211	0.0333736	0.492089	0.91492	426									-0.0831419	0.240627	0.814497	201	-0.159728	0.00296998	0.082033	344
A4GNT_51146	0.0802622	0.245714	0.999491	211	-0.00471053	0.922775	0.990242	426									-0.0166729	0.81427	0.975343	201	-0.0893616	0.0979872	0.397905	344
AAAS_8086	0.0193903	0.779467	0.999491	211	0.00746742	0.877866	0.98639	426	0.151509	0.0429127	0.400268	179	0.0249509	0.675443	0.854997	284	0.126346	0.194705	0.784959	107	0.00977252	0.892702	0.961797	193
AACS_65985	0.0132135	0.848678	0.999491	211	-0.00839458	0.862843	0.984977	426									0.0577842	0.415185	0.886244	201	0.0185978	0.731062	0.897185	344
AADACL2_344752	0.00848346	0.902503	0.999491	211	0.00646408	0.894172	0.987818	426									0.0331412	0.734699	0.963145	107	-0.16322	0.0233274	0.202184	193
AADACL3_126767	-0.0415402	0.548452	0.999491	211	-0.0186424	0.701217	0.959327	426
AADACL4_343066	-0.0714941	0.301293	0.999491	211	-0.0238756	0.623138	0.944942	426									0.042895	0.660879	0.949614	107	-0.0217475	0.764026	0.910657	193
AADAC_13	-0.0437975	0.526917	0.999491	211	-0.0341552	0.482001	0.911418	426									0.109953	0.120221	0.706919	201	0.11456	0.0336671	0.240654	344
AADAT_51166	0.0208998	0.763344	0.999491	210	0.0199532	0.683464	0.955977	420	0.169056	0.0240795	0.332814	178	0.0671246	0.261236	0.557644	282	0.162793	0.0209423	0.532991	201	0.139697	0.00947852	0.136426	344
AAED1_195827	0.072865	0.292094	0.999491	211	-0.0186173	0.701601	0.959419	426									-0.100926	0.300964	0.845264	107	-0.0114691	0.874217	0.954762	193
AAGAB_79719	0.0902553	0.191582	0.999491	211	0.0557339	0.251032	0.825339	426									-0.0903883	0.354498	0.86224	107	-0.133592	0.0640005	0.322686	193
AAK1_22848	0.139621	0.0427655	0.98243	211	0.0796301	0.10073	0.707021	426	-0.00919733	0.903021	0.979276	178	-0.117862	0.0480028	0.239065	282	-0.0195561	0.782892	0.970763	201	0.0362831	0.502397	0.781771	344
AAMDC_28971	0.0166469	0.810028	0.999491	211	0.0307867	0.526267	0.922814	426	0.0401613	0.593499	0.877721	179	-0.0569492	0.338937	0.628074	284
AAMP_14	-0.0838484	0.225179	0.999491	211	0.00531771	0.912858	0.990242	426	-0.176326	0.0182215	0.306551	179	-0.114335	0.0542764	0.253576	284	-0.201443	0.0374666	0.602125	107	-0.032986	0.648819	0.862022	193
AANAT_15	0.0308293	0.656127	0.999491	211	0.0280792	0.563292	0.931042	426	-0.119421	0.111329	0.538238	179	-0.128122	0.0314887	0.193171	282	-0.102261	0.148585	0.741603	201	-0.163228	0.00239106	0.0751513	344
AAR2_25980	0.0650418	0.34713	0.999491	211	-0.0227241	0.639998	0.948768	426									-0.0234729	0.810341	0.974866	107	0.00812747	0.910682	0.967744	193
AARD_441376	0.0713911	0.301991	0.999491	211	0.0316656	0.514522	0.921952	426									0.0294775	0.763108	0.968321	107	0.00461938	0.949163	0.982799	193
AARS2_57505	0.041018	0.553495	0.999491	211	-0.0154535	0.750455	0.965379	426									-0.044659	0.529012	0.923782	201	0.0188161	0.728031	0.895829	344
AARSD1_80755	-0.0617621	0.372034	0.999491	211	0.0201553	0.678273	0.955056	426
AARS_16	8.40492e-05	0.999032	0.999972	211	-0.0684658	0.158356	0.771883	426									-0.0688387	0.331537	0.857431	201	0.0543347	0.314977	0.649675	344
AASDHPPT_60496	0.00610292	0.929778	0.999491	211	0.0899432	0.0636371	0.666528	426									0.0656423	0.354532	0.86224	201	0.0055129	0.918854	0.970411	344
AASDH_132949	-0.0186813	0.787335	0.999491	211	-0.0680538	0.160882	0.772803	426									-0.0557947	0.431454	0.891713	201	-0.0321753	0.552014	0.812851	344
AASS_10157	0.014538	0.834113	0.999491	210	-0.00849211	0.862242	0.984977	420									-0.0802541	0.257412	0.824942	201	0.00325181	0.952082	0.983971	344
AATF_26574	0.0611536	0.376773	0.999491	211	-0.01358	0.779879	0.970576	426	-0.134543	0.0725543	0.466627	179	-0.0523075	0.379827	0.659868	284	-0.0851073	0.229651	0.807512	201	-0.0402513	0.456795	0.757284	344
AATK_9625	0.0833066	0.228201	0.999491	211	0.049074	0.312251	0.851035	426	0.0350047	0.641794	0.891932	179	0.0744765	0.212452	0.505009	282	-0.0111884	0.874741	0.98291	201	-0.0502189	0.353087	0.680793	344
ABAT_18	0.0717915	0.300443	0.999491	210	-0.0417755	0.393125	0.881438	420									0.0339383	0.63244	0.944371	201	0.0747365	0.166651	0.503714	344
ABCA10_10349	0.0563967	0.415077	0.999491	211	-0.00728228	0.880871	0.98639	426	-0.0956535	0.204049	0.645586	178	-0.0670138	0.262026	0.558509	282	0.0233336	0.742313	0.96423	201	0.0102459	0.849821	0.946469	344
ABCA11P_79963									0.00273035	0.971146	0.994518	178	-0.0339103	0.570657	0.795488	282	-0.12572	0.196945	0.785338	107	-0.111465	0.122763	0.439606	193
ABCA12_26154	-0.0906427	0.189675	0.999491	211	-0.0236273	0.626756	0.946507	426	-0.0685716	0.36173	0.764199	179	-0.0906041	0.129048	0.397755	282	-0.0126127	0.858953	0.97998	201	0.0303374	0.574964	0.825515	344
ABCA13_154664	-0.020285	0.769571	0.999491	211	0.0237554	0.624888	0.945571	426	-0.0638545	0.397114	0.784877	178	0.00800235	0.893571	0.957569	282	0.0382754	0.589569	0.934764	201	0.00123554	0.981784	0.993345	344
ABCA1_19	-0.0567819	0.411893	0.999491	211	0.0508332	0.295201	0.847156	426	-0.0486452	0.519046	0.849831	178	-0.0960046	0.107671	0.362617	282	0.0112565	0.873985	0.98291	201	-0.0660693	0.221602	0.564874	344
ABCA2_20	0.0554521	0.422946	0.999491	211	-0.00769438	0.874184	0.98639	426	-0.133386	0.0758998	0.470052	178	-0.122797	0.0393259	0.215733	282	0.139004	0.0490679	0.614805	201	0.0801966	0.137702	0.462549	344
ABCA3_21	0.0389223	0.573957	0.999491	211	0.101293	0.0366262	0.599002	426	0.0349939	0.642842	0.892756	178	-0.0442105	0.459613	0.719555	282	-0.115187	0.103462	0.69366	201	-0.104016	0.0539266	0.299185	344
ABCA4_24	0.0617131	0.372415	0.999491	211	0.0566359	0.243431	0.822159	426	-0.121836	0.104228	0.52918	179	-0.0571746	0.338748	0.628074	282	-0.0153538	0.828728	0.976513	201	-0.028287	0.601085	0.839027	344
ABCA5_23461	-0.00914288	0.894967	0.999491	211	0.0131573	0.786562	0.972751	426	0.0794599	0.291733	0.716972	178	-0.0300106	0.615781	0.819705	282	0.0155859	0.82618	0.976427	201	-5.41769e-05	0.999201	0.999858	344
ABCA6_23460	-0.024579	0.722617	0.999491	211	0.0479936	0.323037	0.857221	426	-0.13781	0.0665905	0.459791	178	-0.0702347	0.239733	0.533	282	0.0937417	0.185621	0.782928	201	0.0871782	0.106505	0.411804	344
ABCA7_10347	-0.0923917	0.181237	0.999491	211	-0.0732663	0.131098	0.746263	426	0.0225138	0.765479	0.93904	178	0.0439885	0.461873	0.721113	282	0.0830161	0.241342	0.814497	201	0.233553	1.20502e-05	0.00721073	344
ABCA8_10351	0.0288763	0.676644	0.999491	211	0.0378712	0.435605	0.893345	426	-0.0163479	0.828051	0.957891	179	-0.0146097	0.807027	0.921991	282	0.138518	0.154772	0.750905	107	0.0532724	0.461853	0.759555	193
ABCA9_10350	-0.0205385	0.766773	0.999491	211	-0.0050506	0.917219	0.990242	426	-0.00414558	0.956078	0.989324	179	-0.000541412	0.992778	0.997748	282	-0.0632977	0.372019	0.87012	201	-0.138009	0.0103878	0.141387	344
ABCB10_23456	0.0123429	0.85854	0.999491	211	0.0566023	0.243711	0.822159	426	-0.112264	0.135711	0.572174	178	-0.142765	0.0164361	0.140247	282	0.0295329	0.677278	0.953169	201	0.0372359	0.491234	0.774712	344
ABCB11_8647	0.0500741	0.469372	0.999491	211	0.0933814	0.0541147	0.648988	426	-0.0535411	0.477826	0.829825	178	-0.0743928	0.212968	0.505483	282	-0.140526	0.0466183	0.607379	201	-0.016408	0.76171	0.909978	344
ABCB1_5243	0.0844904	0.221636	0.999491	211	0.0584228	0.228853	0.816262	426	-0.049117	0.514995	0.848032	178	-0.186593	0.00164839	0.046814	282	-0.0659485	0.352287	0.861563	201	0.0612634	0.257132	0.599367	344
ABCB4_5244	0.0319893	0.64406	0.999491	211	0.0847893	0.0804572	0.683132	426	-0.103964	0.166065	0.61022	179	-0.132505	0.0260768	0.175052	282	0.0227061	0.749007	0.966055	201	0.135318	0.0119982	0.1499	344
ABCB5_340273	-0.0928499	0.179073	0.999491	211	0.0813524	0.093554	0.701914	426	0.0677686	0.368754	0.767837	178	0.0739246	0.21587	0.509082	282	0.136794	0.0528187	0.624509	201	0.150859	0.00504903	0.102517	344
ABCB6_10058	0.00166651	0.980802	0.999491	211	-0.0149893	0.757715	0.966322	426	-0.00184037	0.980549	0.995672	178	-0.0697692	0.24287	0.536265	282	0.0386146	0.586273	0.933436	201	0.0341994	0.527269	0.797318	344
ABCB7_22	-0.0542142	0.433389	0.999491	211	-0.0184815	0.703674	0.960226	426	0.0684765	0.362398	0.764382	179	0.0124713	0.834834	0.935064	282	-0.0125148	0.860036	0.980204	201	0.0311259	0.565062	0.821012	344
ABCB8_11194	-0.0509408	0.461706	0.999491	211	-0.0354082	0.466064	0.906548	426	-0.19367	0.00959053	0.248491	178	-0.199352	0.000760813	0.0324464	282	0.0526883	0.457577	0.898539	201	0.0808311	0.134605	0.458397	344
ABCB9_23457	-0.0469752	0.497343	0.999491	211	-0.0747994	0.123204	0.739736	426	-0.0361626	0.631777	0.88758	178	-0.0743588	0.213178	0.50583	282	-0.12252	0.0831455	0.671199	201	0.0300255	0.578902	0.827815	344
ABCC10_89845	0.185494	0.00689377	0.98243	211	0.0136465	0.778829	0.97038	426	-0.0610914	0.417897	0.799982	178	-0.0550963	0.356625	0.64157	282	-0.0255098	0.719246	0.958617	201	-0.0697921	0.196595	0.542677	344
ABCC11_85320	-0.00499106	0.942547	0.999491	211	-0.00923933	0.849198	0.981686	426	0.0648691	0.38964	0.781089	178	0.0551409	0.356235	0.641015	282	0.00674797	0.924257	0.989814	201	0.00356477	0.947476	0.982322	344
ABCC12_94160	0.00584553	0.932732	0.999491	211	0.0122067	0.801649	0.974983	426	-0.131211	0.0808464	0.483321	178	-0.149575	0.0119102	0.121618	282	-0.0209388	0.767963	0.968617	201	-0.0352574	0.514563	0.789443	344
ABCC13_150000																	0.00366163	0.958856	0.993221	201	-0.0773601	0.152218	0.485055	344
ABCC1_4363	0.0211071	0.76051	0.999491	211	-0.0293369	0.545939	0.924622	426	-0.0884371	0.24044	0.680581	178	0.00675469	0.910088	0.966396	282	-0.135408	0.0552884	0.628825	201	0.0308669	0.568306	0.822277	344
ABCC2_1244	-0.0696806	0.313752	0.999491	211	-0.0163097	0.737127	0.964906	426	-0.0248199	0.741558	0.930829	179	0.0740907	0.214837	0.507954	282	0.0335759	0.636081	0.944441	201	0.0390236	0.470651	0.763702	344
ABCC3_8714	0.074796	0.279459	0.999491	211	-0.0166914	0.731209	0.964022	426	-0.103972	0.166032	0.61022	179	-0.0738813	0.21614	0.509355	282	0.122054	0.0843334	0.671467	201	0.101724	0.0594667	0.314251	344
ABCC4_10257	0.0908842	0.188493	0.999491	211	0.0147105	0.762083	0.967085	426	-0.102352	0.172767	0.61464	179	-0.0672045	0.260668	0.556947	282	-0.0284243	0.68875	0.954452	201	0.0499848	0.355339	0.682297	344
ABCC5_10057	-0.0598389	0.387136	0.999491	211	-0.0604429	0.213131	0.804004	426	-0.0811793	0.281384	0.708191	178	0.109222	0.0670274	0.284037	282	-0.0186212	0.79303	0.971804	201	0.0938459	0.0821961	0.364541	344
ABCC6P1_653190									0.0915233	0.224358	0.667938	178	0.0710205	0.234502	0.527595	282
ABCC6_368	-0.0918545	0.183799	0.999491	211	0.0065147	0.893349	0.987818	426	-0.160104	0.0327774	0.368775	178	-0.181605	0.00220147	0.0533	282
ABCC8_6833	-0.160904	0.0193544	0.98243	211	-0.0563302	0.245988	0.822769	426	-0.0949795	0.20598	0.64779	179	0.0392524	0.511512	0.756371	282	0.169331	0.0162572	0.508203	201	0.130019	0.015823	0.171484	344
ABCC9_10060	0.0114296	0.868909	0.999491	211	-0.0337458	0.48727	0.911715	426	0.0634753	0.390687	0.781279	185	0.0268904	0.648938	0.837287	289	-0.000950145	0.989319	0.998413	201	0.110739	0.0400974	0.259732	344
ABCD1_215	-0.034923	0.613961	0.999491	211	0.0683983	0.158768	0.772641	426	0.0187885	0.80287	0.950001	179	-0.0313867	0.59968	0.810209	282	-0.137723	0.0512141	0.622796	201	-0.101343	0.0604327	0.316144	344
ABCD2_225	-0.0778692	0.26012	0.999491	211	-0.0509618	0.29398	0.847156	426	0.0237019	0.753492	0.933688	178	0.0248547	0.677708	0.856623	282	0.0975505	0.168302	0.763788	201	0.00169619	0.974994	0.991436	344
ABCD3_5825	0.0074482	0.914353	0.999491	211	0.0305208	0.529848	0.92284	426	0.031489	0.676489	0.90502	178	0.0379465	0.525671	0.76558	282	-0.0136481	0.847509	0.979146	201	0.108738	0.0438595	0.27027	344
ABCD4_5826	0.0698839	0.312338	0.999491	211	0.056455	0.244942	0.822159	426	-0.0239513	0.750298	0.93261	179	-0.0441918	0.459803	0.719657	282	-0.00205133	0.976943	0.996693	201	-0.0133421	0.805241	0.927259	344
ABCE1_6059	0.0404144	0.559352	0.999491	211	-0.0138506	0.775608	0.97038	426	0.00482781	0.948859	0.988029	179	0.0268188	0.653832	0.840645	282	-0.0187851	0.847704	0.979163	107	0.0506569	0.484161	0.77148	193
ABCF1_23	0.0840898	0.223842	0.999491	211	0.0931029	0.0548391	0.648988	426	-0.0891898	0.236445	0.676585	178	-0.0205582	0.731046	0.885091	282	-0.154484	0.112111	0.700846	107	-0.026254	0.717035	0.891235	193
ABCF2_10061	0.0173116	0.802594	0.999491	211	0.0591308	0.223252	0.811781	426	0.0378623	0.607898	0.883583	186	0.0183843	0.754821	0.897468	291	0.0184654	0.794723	0.971804	201	0.0449904	0.405503	0.720313	344
ABCF3_55324	0.00675868	0.922255	0.999491	211	0.0596443	0.219251	0.808591	426	0.0180804	0.810685	0.951163	178	-0.0167669	0.779221	0.907223	282	0.132944	0.172223	0.769176	107	0.0546541	0.450302	0.753567	193
ABCG1_9619	-0.0346095	0.617148	0.999491	211	-0.0641864	0.18608	0.787104	426	-0.00811992	0.914335	0.981313	178	-0.0763182	0.20133	0.491462	282	-0.127613	0.190231	0.782928	107	-0.126201	0.0803166	0.360972	193
ABCG2_9429	-0.0212113	0.759364	0.999491	211	-0.0371841	0.443985	0.896328	426	0.129673	0.084499	0.491883	178	0.113649	0.0566246	0.259243	282	0.0428492	0.545857	0.925568	201	0.11136	0.0389874	0.256439	344
ABCG4_64137	-0.0838971	0.224909	0.999491	211	-0.0849091	0.0800292	0.682598	426	-0.059513	0.428738	0.804136	179	-0.113359	0.0572634	0.260809	282	-0.00178543	0.979931	0.997546	201	-0.0467303	0.387568	0.707875	344
ABCG5_64240	0.0236734	0.73244	0.999491	211	0.00892742	0.854231	0.983454	426	-0.0880823	0.241002	0.680581	179	-0.141109	0.0177415	0.145117	282	-0.0247523	0.727248	0.961193	201	0.0114627	0.832236	0.938745	344
ABCG8_64241	0.042161	0.542486	0.999491	211	-0.00826388	0.864958	0.984977	426	-0.0611742	0.415941	0.799308	179	-0.106656	0.0737418	0.29822	282	0.12939	0.067148	0.653728	201	-0.0219546	0.684916	0.878562	344
ABHD10_55347	-0.0239125	0.729842	0.999491	211	0.0529687	0.275354	0.838392	426									0.0832093	0.240244	0.814497	201	0.0355379	0.51122	0.787166	344
ABHD11_83451	-0.0514113	0.457574	0.999491	211	-0.0145994	0.763827	0.967541	426									0.115792	0.10165	0.6916	201	0.111594	0.0385756	0.256016	344
ABHD12B_145447	0.0379608	0.583462	0.999491	211	0.0290284	0.550171	0.926007	426									-0.106364	0.132881	0.729019	201	-0.103695	0.0546755	0.300949	344
ABHD12_26090	-0.0788009	0.254443	0.999491	211	0.0201903	0.677746	0.955056	426									-0.0946724	0.181273	0.781088	201	0.0117941	0.827461	0.93736	344
ABHD13_84945	0.0378391	0.584671	0.999491	211	0.0475095	0.327948	0.859893	426	-0.146157	0.0515707	0.424434	178	-0.146511	0.0137889	0.129672	282	-0.0910274	0.198737	0.78609	201	-0.0252836	0.640279	0.858573	344
ABHD14A-ACY1_100526760																	-0.031083	0.661361	0.949614	201	-0.075819	0.160577	0.496225	344
ABHD14A_25864	0.0899591	0.19305	0.999491	211	0.0404802	0.404625	0.885278	426									-0.102345	0.148249	0.741603	201	0.00421113	0.937971	0.97815	344
ABHD14B_84836	0.0286348	0.679197	0.999491	211	0.0209447	0.666417	0.953758	426									0.00528696	0.940622	0.990913	201	-0.0316159	0.558952	0.817471	344
ABHD15_116236	0.0925776	0.180357	0.999491	211	0.0733792	0.130504	0.7453	426									0.0346284	0.723266	0.960018	107	0.0251632	0.728319	0.895829	193
ABHD16A_7920	0.0227952	0.742009	0.999491	211	-0.00469872	0.922968	0.990242	426									-0.00298723	0.966429	0.994377	201	0.0203196	0.70726	0.887454	344
ABHD16B_140701	-0.0995623	0.149523	0.999491	211	0.0307189	0.527179	0.92284	426									0.048681	0.492539	0.91433	201	-0.0663987	0.219302	0.562425	344
ABHD17A_81926	0.0155891	0.821891	0.999491	211	-0.00791308	0.870639	0.985079	426									-0.0396419	0.576343	0.932634	201	-0.0665703	0.21811	0.561692	344
ABHD17B_51104	0.003376	0.96112	0.999491	211	-0.05183	0.285821	0.845391	426									0.00826492	0.907299	0.987514	201	-0.010925	0.839997	0.942171	344
ABHD17C_58489	0.0117118	0.865703	0.999491	211	0.0301023	0.535509	0.923421	426
ABHD18_80167	0.0044691	0.948547	0.999491	211	-0.0322544	0.506729	0.919915	426
ABHD1_84696	-0.117321	0.0891434	0.999491	211	-0.0122715	0.800618	0.974871	426
ABHD2_11057	0.0221975	0.748543	0.999491	211	0.0495651	0.307428	0.848593	426									0.181199	0.0100454	0.480404	201	0.160305	0.00286656	0.0809541	344
ABHD3_171586	-0.049323	0.476071	0.999491	211	0.0424157	0.382516	0.877883	426									-0.11588	0.101389	0.69112	201	-0.132018	0.01427	0.163285	344
ABHD4_63874	-0.0792286	0.251867	0.999491	211	0.0196487	0.685925	0.956583	426									0.0585832	0.408753	0.884604	201	0.0486627	0.368223	0.692277	344
ABHD5_51099	-0.0814367	0.23885	0.999491	211	-0.0301265	0.53518	0.923421	426									-0.0196517	0.781857	0.970763	201	-0.0702019	0.193973	0.539333	344
ABHD6_57406	0.0721304	0.296999	0.999491	211	0.0208431	0.667939	0.953758	426									-0.00534353	0.956437	0.993066	107	-0.0779201	0.281433	0.622964	193
ABHD8_79575	0.0702947	0.309495	0.999491	211	0.0543865	0.26269	0.831851	426									0.0479618	0.498961	0.915772	201	0.0326884	0.545688	0.809043	344
ABI1_10006	0.0551461	0.425514	0.999491	211	0.047434	0.328717	0.860685	426	0.0609772	0.417447	0.799705	179	0.0935479	0.117022	0.378018	282	-0.100372	0.303639	0.847065	107	0.0657246	0.363812	0.688891	193
ABI2_10152	0.0573186	0.407481	0.999491	211	0.0356747	0.462712	0.904971	426									0.0515115	0.598242	0.937095	107	0.0861383	0.233609	0.575678	193
ABI3BP_25890	0.125596	0.0686421	0.987144	211	0.00377201	0.938126	0.991867	426									-0.0144884	0.882251	0.983757	107	-0.0103439	0.886469	0.959063	193
ABI3_51225	-0.0298873	0.665992	0.999491	211	0.0366663	0.45036	0.899405	426									0.0657694	0.500907	0.916139	107	0.0622411	0.389845	0.709455	193
ABL1_25	0.0735322	0.287686	0.999491	211	0.103458	0.032777	0.584974	426	-0.0100351	0.892161	0.976528	185	-0.0765555	0.194387	0.483091	289	0.0744121	0.293787	0.842589	201	-0.0726151	0.179052	0.518763	344
ABL2_27	0.0689899	0.318584	0.999491	211	-0.0527616	0.277238	0.840028	426	0.0332183	0.658896	0.897338	179	-0.0320736	0.591715	0.805552	282	0.121476	0.0858252	0.676215	201	0.117747	0.0289962	0.226389	344
ABLIM1_3983	0.00869956	0.900033	0.999491	211	-0.0510201	0.293427	0.847156	426									-0.0700911	0.322794	0.856403	201	-0.0286073	0.59697	0.837147	344
ABLIM2_84448	-0.0263223	0.703835	0.999491	211	-0.0523446	0.281059	0.84299	426									-0.0279914	0.774724	0.969689	107	0.102673	0.155354	0.48869	193
ABLIM3_22885	-0.00198729	0.977107	0.999491	211	-0.0139642	0.773818	0.97038	426									-0.135414	0.0552769	0.628825	201	0.0315933	0.559233	0.817471	344
ABO_28																	0.0717244	0.311619	0.850078	201	0.0956835	0.0763491	0.353007	344
ABRACL_58527	-0.0394763	0.568514	0.999491	211	-0.00542869	0.911047	0.990242	426
ABRAXAS1_84142	0.0166651	0.810272	0.999491	210	0.0575318	0.239391	0.822159	420	-0.0489264	0.51663	0.849159	178	-0.0322988	0.589114	0.804621	282	-0.00898667	0.926802	0.990192	107	0.0267887	0.711525	0.888672	193
ABRAXAS2_23172	-0.00630583	0.927449	0.999491	211	0.0118582	0.8072	0.976449	426									0.0137225	0.888434	0.984775	107	0.00738406	0.918822	0.970411	193
ABRA_137735	0.011389	0.869371	0.999491	211	0.0545112	0.261596	0.831694	426									-0.00449497	0.949504	0.992152	201	-0.0210671	0.697012	0.88393	344
ABR_29	0.0796124	0.24957	0.999491	211	0.0258373	0.594866	0.939141	426	-0.177948	0.0171648	0.304261	179	-0.157771	0.00772666	0.102991	284	0.0534861	0.450785	0.897019	201	-0.140163	0.0092403	0.134627	344
ABT1_29777	-0.0199948	0.773307	0.999491	210	-0.0384914	0.43141	0.891465	420									-0.0524969	0.459215	0.898748	201	-0.0739927	0.170924	0.509759	344
ABTB1_80325	-0.0184905	0.789456	0.999491	211	-0.0151111	0.755807	0.966322	426	-0.00711819	0.92487	0.982431	178	-0.0350044	0.558284	0.786351	282	0.0172106	0.860333	0.980204	107	-0.15893	0.0272696	0.219243	193
ABTB2_25841	0.0903572	0.191079	0.999491	211	0.0162126	0.738634	0.964906	426	-0.0231203	0.758689	0.935473	179	-0.115806	0.052063	0.24803	282	-0.0333344	0.73321	0.963044	107	-0.120616	0.094747	0.392165	193
ACAA1_30	-0.0472924	0.49444	0.999491	211	0.00268589	0.955921	0.995077	426									0.0470647	0.507033	0.917827	201	0.110243	0.0410032	0.262718	344
ACAA2_10449	-0.0887054	0.199353	0.999491	211	0.0217873	0.653852	0.951663	426									0.159321	0.0238755	0.542976	201	0.179806	0.000807778	0.0504999	344
ACACA_31	0.055665	0.421165	0.999491	211	0.0543103	0.26336	0.832074	426	0.133927	0.0691466	0.465194	185	0.155842	0.00795266	0.104226	289	0.0151223	0.831272	0.97699	201	0.0508354	0.347201	0.675683	344
ACACB_32	0.0541034	0.434331	0.999491	211	-0.0657189	0.175768	0.783036	426	0.0111993	0.879739	0.972286	185	-0.0975477	0.0979095	0.346265	289	0.0146571	0.836388	0.977858	201	0.00860613	0.873636	0.954675	344
ACAD10_80724	0.0534556	0.439862	0.999491	211	0.0424736	0.381865	0.877883	426	0.0273532	0.716257	0.921909	179	-0.000502629	0.993295	0.997748	282	0.21277	0.00242517	0.341459	201	0.134922	0.0122524	0.151281	344
ACAD11_84129	0.0649516	0.347801	0.999491	211	0.0332989	0.493058	0.915178	426	-0.169395	0.0233979	0.328332	179	-0.0881299	0.139876	0.413814	282	-0.169007	0.0164657	0.509451	201	-0.209242	9.22576e-05	0.0163	344
ACAD8_27034	-0.0702666	0.309689	0.999491	211	-0.0396577	0.414248	0.886001	426	0.0968279	0.19725	0.641807	179	0.055779	0.350689	0.637361	282	0.00693092	0.922209	0.989814	201	-0.125288	0.0201016	0.190082	344
ACAD9_28976	-0.0795033	0.250221	0.999491	211	-0.0549187	0.258041	0.82854	426	-0.0446864	0.552531	0.861979	179	-0.116154	0.0513552	0.246038	282	-0.127192	0.0719662	0.661434	201	-0.0808642	0.134445	0.45813	344
ACADL_33	-0.107631	0.119072	0.999491	211	-0.117823	0.0149667	0.492845	426	0.0769784	0.305738	0.730893	179	-0.0179303	0.764339	0.901316	282	-0.100375	0.15626	0.752416	201	0.0160841	0.766276	0.911276	344
ACADM_34	-0.043574	0.52903	0.999491	211	-0.0686974	0.15695	0.770252	426	0.134336	0.0729991	0.466658	179	0.0828039	0.165527	0.44999	282	0.108821	0.124111	0.7154	201	0.042177	0.435528	0.743255	344
ACADSB_36	0.0927406	0.179587	0.999491	211	0.0361765	0.456438	0.902028	426	0.147938	0.0487598	0.415089	178	0.140646	0.0181219	0.146905	282	-0.00178987	0.979881	0.997546	201	0.0050631	0.925455	0.973478	344
ACADS_35	-0.106251	0.123907	0.999491	211	0.0203383	0.675518	0.954896	426	0.0423273	0.574805	0.870888	178	0.0421039	0.481298	0.735722	282	-0.00150585	0.983073	0.997819	201	-0.033198	0.53944	0.805698	344
ACADVL_37	0.205085	0.00276054	0.953229	211	0.0645366	0.183686	0.78542	426	-0.0665838	0.375848	0.774119	179	-0.057648	0.334756	0.624195	282	-0.0584158	0.410096	0.884604	201	-0.101304	0.0605324	0.316252	344
ACAN_176	-0.158216	0.0215011	0.98243	211	-0.0132618	0.784909	0.972245	426	-0.167413	0.0250928	0.337462	179	-0.145355	0.0145628	0.132276	282	0.112462	0.248779	0.81995	107	0.00573299	0.93693	0.97793	193
ACAP1_9744	0.00609143	0.92991	0.999491	211	-0.0710798	0.143026	0.758678	426	-0.0471413	0.532063	0.855005	178	-0.0751055	0.208605	0.500489	282	-0.0719383	0.310175	0.849731	201	-0.0446108	0.409481	0.722079	344
ACAP2_23527	0.102912	0.136233	0.999491	211	0.127366	0.00849343	0.427479	426	-0.110987	0.139121	0.575461	179	-0.121751	0.041045	0.22118	282	-0.215264	0.0259652	0.554827	107	-0.0392974	0.587405	0.832353	193
ACAP3_116983	0.0690385	0.318242	0.999491	211	0.0280111	0.564238	0.931321	426	-0.240802	0.00116607	0.125668	179	-0.144873	0.0148966	0.133621	282	0.0690612	0.479673	0.907716	107	0.0283233	0.695795	0.883609	193
ACAT1_38	-0.10784	0.118355	0.999491	211	0.0374982	0.440144	0.894974	426									-0.152138	0.0310799	0.572246	201	-0.223762	2.8107e-05	0.0109205	344
ACAT2_39	0.00203151	0.976598	0.999491	211	-0.0497672	0.305457	0.847511	426									0.00291347	0.967258	0.994536	201	0.0817179	0.130367	0.451208	344
ACBD3_64746	0.0145993	0.833029	0.999491	211	0.0479879	0.323095	0.857249	426									0.200707	0.00427804	0.410016	201	0.160287	0.00286978	0.0809541	344
ACBD4_79777	0.0156793	0.820878	0.999491	211	0.0606278	0.211732	0.803385	426									-0.203333	0.0356776	0.597209	107	-0.233988	0.00105611	0.0546146	193
ACBD5_91452	0.0230335	0.739408	0.999491	211	0.0278033	0.567134	0.932054	426	0.041413	0.582029	0.875294	179	-0.0325854	0.584474	0.801544	284	-0.105291	0.13686	0.732324	201	-0.0246615	0.648529	0.861832	344
ACBD6_84320	0.0560416	0.418025	0.999491	211	0.0258232	0.595067	0.939141	426									0.0683296	0.48435	0.910887	107	0.111875	0.121383	0.436714	193
ACBD7_414149	-0.0402344	0.561105	0.999491	211	0.0269092	0.579669	0.936692	426
ACCSL_390110	-0.0658795	0.340942	0.999491	211	-0.0583765	0.229223	0.816262	426	0.0178872	0.812147	0.951642	179	0.0466164	0.435527	0.703815	282	0.0755876	0.439044	0.893894	107	0.0131777	0.85567	0.948649	193
ACCS_84680	0.0321404	0.642495	0.999491	211	-0.00324275	0.946794	0.993452	426	-0.181376	0.0151055	0.29261	179	-0.0288758	0.629199	0.829125	282	0.102113	0.149179	0.741842	201	-0.0190219	0.725175	0.894589	344
ACD_65057	0.182137	0.0081489	0.98243	210	0.125108	0.0102759	0.443306	420									0.263958	0.00600994	0.421727	107	0.211098	0.00320982	0.0848091	193
ACE2_59272	0.0192859	0.780624	0.999491	211	0.00409915	0.932772	0.990965	426									0.0766196	0.279659	0.835562	201	0.170568	0.00149658	0.0616098	344
ACER1_125981	-0.0570861	0.409388	0.999491	211	0.0372338	0.443376	0.896328	426									-0.0729344	0.303505	0.847027	201	-0.0543092	0.315205	0.64992	344
ACER2_340485	-0.0154569	0.823376	0.999491	211	0.0617178	0.203619	0.800384	426									0.101842	0.150266	0.743044	201	0.0968596	0.0727878	0.343002	344
ACER3_55331	0.016199	0.815046	0.999491	211	0.0414147	0.393857	0.881559	426									0.110214	0.119338	0.706255	201	0.0133973	0.804452	0.927074	344
ACE_1636	0.00103759	0.988046	0.999491	211	0.0373134	0.442401	0.895628	426									0.164884	0.019331	0.526985	201	0.190666	0.000376351	0.0328478	344
ACHE_43	-0.0551609	0.425389	0.999491	211	-0.0288185	0.553059	0.926828	426	-0.127123	0.0899305	0.500084	179	-0.087998	0.140472	0.413959	282	-0.124741	0.0776676	0.665116	201	0.0118911	0.826065	0.936802	344
ACIN1_22985	0.0156789	0.820883	0.999491	211	-0.0432477	0.373242	0.874239	426	-0.0199909	0.790537	0.947338	179	-0.0357105	0.550368	0.780022	282	0.0503009	0.478238	0.906664	201	0.0329557	0.542407	0.807086	344
ACKR1_2532	0.0886704	0.199531	0.999491	211	0.102793	0.0339206	0.589504	426									0.017683	0.803241	0.97336	201	-0.0108621	0.840906	0.942623	344
ACKR2_1238	0.0359699	0.603372	0.999491	211	0.0261124	0.590949	0.939141	426	-0.0940893	0.211578	0.65442	178	-0.127227	0.0327038	0.1961	282	0.0680172	0.337353	0.858398	201	0.0200408	0.711095	0.888452	344
ACKR3_57007	-0.0516756	0.455262	0.999491	211	-0.0991163	0.0408781	0.612506	426									0.0762471	0.28201	0.835562	201	-0.0172352	0.750087	0.906238	344
ACKR4_51554	0.0859611	0.213668	0.999491	211	0.00509548	0.916486	0.990242	426	-0.176201	0.018638	0.306551	178	-0.116495	0.0506722	0.244028	282	0.0483095	0.495851	0.915772	201	0.00929302	0.863645	0.951851	344
ACLY_47	-0.0236706	0.732471	0.999491	211	0.0322266	0.507096	0.919939	426	-0.16291	0.0293394	0.353981	179	-0.177392	0.00279504	0.0599206	282	-0.0104264	0.883209	0.983757	201	-0.0623307	0.24892	0.59196	344
ACMSD_130013	-0.0809343	0.241769	0.999491	211	-0.0363631	0.454117	0.900999	426									-0.150441	0.03303	0.587166	201	-0.192843	0.000321267	0.030865	344
ACO1_48	0.0208222	0.763646	0.999491	211	0.0242384	0.617864	0.944096	426	-0.050137	0.506295	0.843941	178	-0.0810896	0.174491	0.462588	282	0.122107	0.084198	0.671216	201	0.153675	0.00427858	0.0945139	344
ACO2_50	0.0425069	0.539177	0.999491	211	0.0217934	0.653762	0.951663	426	0.12267	0.102835	0.52918	178	-0.0125735	0.8335	0.934746	282	0.0720278	0.309571	0.849558	201	-0.0447864	0.407639	0.721611	344
ACOD1_730249	-0.0460188	0.506151	0.999491	211	-0.0263544	0.587512	0.938836	426
ACOT11_26027	0.067663	0.328003	0.999491	211	0.00389579	0.9361	0.991477	426	-0.0587105	0.435001	0.807273	179	0.00180131	0.975975	0.993161	282	0.00488113	0.945172	0.991042	201	-0.0457604	0.397506	0.714872	344
ACOT12_134526	-0.0759124	0.272324	0.999491	211	-0.0241226	0.619545	0.944942	426	-0.0962094	0.200141	0.64466	179	-0.0952849	0.110348	0.367135	282	-0.0985072	0.164148	0.761643	201	-0.118097	0.0285192	0.224022	344
ACOT13_55856	-0.0259841	0.707465	0.999491	211	0.0494663	0.308394	0.849329	426									-0.0454124	0.522077	0.921061	201	-0.100723	0.0620292	0.319199	344
ACOT1_641371	-0.0311355	0.652933	0.999491	211	-0.0346866	0.475205	0.909405	426	-0.0439438	0.559158	0.86406	179	-0.0667709	0.262062	0.558509	284	0.111549	0.114901	0.702158	201	0.212869	6.90712e-05	0.0137772	344
ACOT2_10965	0.00877925	0.899122	0.999491	211	0.0179212	0.712253	0.962171	426									0.0723311	0.307533	0.848742	201	-0.0732176	0.175462	0.514592	344
ACOT4_122970	-0.0944532	0.171651	0.999491	211	-0.159136	0.000981036	0.236271	426									0.0184556	0.79483	0.971804	201	-0.0417416	0.440286	0.745913	344
ACOT6_641372	-0.0483859	0.484502	0.999491	211	-0.104399	0.0312143	0.576175	426
ACOT7_11332	0.00339679	0.960881	0.999491	211	0.0356078	0.463552	0.904971	426									-0.00792012	0.91115	0.988413	201	0.050458	0.350797	0.678966	344
ACOT8_10005	0.0106541	0.877732	0.999491	211	-4.29965e-05	0.999294	0.999949	426									-0.0398052	0.574771	0.932477	201	0.0333556	0.537516	0.804379	344
ACOT9_23597	-0.0389281	0.5739	0.999491	211	-0.0258095	0.595263	0.939141	426									-0.15087	0.0325284	0.586977	201	-0.131226	0.0148684	0.166104	344
ACOX1_51	0.0524416	0.448598	0.999491	211	0.117556	0.0151981	0.493462	426	-0.00518102	0.945279	0.986598	178	-0.0331469	0.579366	0.799069	282	-0.0576449	0.416311	0.886826	201	-0.0697577	0.196816	0.542677	344
ACOX2_8309	0.0857171	0.214976	0.999491	211	-0.018082	0.709787	0.96183	426	-0.04713	0.530995	0.854965	179	-0.115409	0.0528784	0.249825	282	-0.0829967	0.241452	0.814497	201	-0.0986732	0.0675619	0.331868	344
ACOX3_8310	0.127745	0.0639999	0.987144	211	0.104241	0.0314728	0.576175	426	-0.0342487	0.643499	0.892813	185	-0.0259483	0.660457	0.845584	289	0.0272065	0.701435	0.956216	201	-0.0207726	0.701043	0.88535	344
ACOXL-AS1_400997																	0.0826748	0.397218	0.882671	107	0.0623715	0.388851	0.708481	193
ACOXL_55289	-0.0754558	0.275227	0.999491	211	-0.0398229	0.412304	0.886001	426	0.0258434	0.732033	0.928122	178	-0.0557163	0.351231	0.63791	282	-0.0234525	0.741046	0.964157	201	0.0171144	0.751781	0.906764	344
ACP1_52	0.0727155	0.293088	0.999491	211	-0.0446464	0.357969	0.869816	426									-0.0646057	0.362198	0.864447	201	-0.0307065	0.57032	0.822916	344
ACP2_53	-0.0343697	0.619592	0.999491	211	-0.0809706	0.0951084	0.703317	426									0.00503825	0.94341	0.990913	201	-0.0662907	0.220055	0.563333	344
ACP4_93650	-0.0993443	0.150421	0.999491	211	-0.0944884	0.0513132	0.645655	426
ACP5_54	0.136403	0.0478322	0.98243	211	-0.0124834	0.79725	0.974463	426	-0.0870668	0.247833	0.688096	178	-0.0527304	0.377683	0.658509	282	0.0395536	0.577193	0.932793	201	0.0451441	0.4039	0.71985	344
ACP6_51205	-0.0160159	0.817099	0.999491	211	-0.00435866	0.928527	0.990788	426									-0.205292	0.00346038	0.386524	201	-0.171168	0.00143916	0.0608666	344
ACP7_390928	-0.0314738	0.649411	0.999491	211	-0.103638	0.0324729	0.584974	426	-0.0897942	0.231945	0.673129	179	0.0176143	0.768374	0.903462	282	0.0329448	0.642443	0.94688	201	-0.00134124	0.980226	0.992908	344
ACPP_55	0.0747894	0.279501	0.999491	211	0.0681103	0.160533	0.772717	426									-0.142314	0.0438701	0.607325	201	-0.109601	0.0422014	0.266021	344
ACRBP_84519	0.004934	0.943203	0.999491	211	-0.0895794	0.064721	0.666528	426									0.0531643	0.453518	0.897766	201	0.0771213	0.153491	0.486442	344
ACRV1_56	-0.0313581	0.650615	0.999491	211	0.0399164	0.411206	0.886001	426									0.185198	0.0561643	0.629395	107	0.0631285	0.383109	0.704299	193
ACR_49	-0.00787389	0.909478	0.999491	211	0.0421354	0.385671	0.878481	426									0.0631094	0.373446	0.870952	201	0.075393	0.162947	0.498677	344
ACSBG1_23205	0.147182	0.0326067	0.98243	211	0.0701735	0.148207	0.76284	426									0.116767	0.231008	0.808087	107	0.0145276	0.841071	0.942682	193
ACSBG2_81616	-0.0785794	0.255785	0.999491	211	-0.0565145	0.244445	0.822159	426									0.144795	0.136743	0.732324	107	0.0769755	0.287324	0.627818	193
ACSF2_80221	-0.0144035	0.835236	0.999491	211	0.0599284	0.21706	0.805848	426									-0.04364	0.655362	0.94875	107	-0.0374302	0.605296	0.841368	193
ACSF3_197322	-0.0258367	0.70905	0.999491	211	-0.0295074	0.543607	0.9244	426									0.110236	0.258329	0.825001	107	0.0143298	0.843207	0.943379	193
ACSL1_2180	0.0531874	0.442162	0.999491	211	-0.0164733	0.734587	0.964627	426									-0.0521145	0.462497	0.89979	201	0.0311095	0.565268	0.821071	344
ACSL3_2181	0.0271115	0.69539	0.999491	211	-0.0219056	0.652097	0.951622	426	-0.100974	0.178653	0.62	179	-0.129615	0.0295463	0.187333	282	-0.0986676	0.163459	0.761187	201	-0.137779	0.0105176	0.142362	344
ACSL4_2182	-0.0519308	0.453036	0.999491	211	-0.0079834	0.8695	0.984977	426									-0.0301992	0.670418	0.952137	201	-0.000224378	0.996692	0.998234	344
ACSL5_51703	0.0227301	0.742719	0.999491	211	0.037784	0.436663	0.894279	426									0.0167205	0.81375	0.975068	201	-0.0420421	0.436999	0.744345	344
ACSL6_23305	0.0120718	0.861615	0.999491	211	0.00312113	0.948787	0.993829	426	-0.0572635	0.447714	0.815001	178	-0.0171118	0.774801	0.905699	282	0.0277863	0.695385	0.955203	201	0.0530651	0.326435	0.659681	344
ACSM1_116285	-0.0398645	0.564714	0.999491	211	-0.0392573	0.41898	0.887065	426									-0.0441495	0.533727	0.925256	201	-0.144984	0.00707034	0.121012	344
ACSM2A_123876	-0.0386314	0.576825	0.999491	211	-0.0585901	0.227521	0.815774	426
ACSM2B_348158	-0.00192276	0.97785	0.999491	211	-0.00641845	0.894915	0.988055	426									0.0357158	0.61471	0.940505	201	-0.00601845	0.911442	0.967757	344
ACSM3_6296	-0.0492246	0.476953	0.999491	211	-0.00402119	0.934048	0.991332	426									-0.0141019	0.842503	0.978031	201	-0.0564917	0.296122	0.635116	344
ACSM4_341392	0.0859365	0.2138	0.999491	211	0.0495984	0.307103	0.848593	426
ACSM5_54988	-0.0286374	0.67917	0.999491	211	0.00719273	0.882325	0.986554	426									-0.0865525	0.375372	0.870952	107	0.0384406	0.595584	0.836709	193
ACSM6_142827	-0.0193007	0.78046	0.999491	211	0.00519854	0.914803	0.990242	426									-0.154192	0.112798	0.700846	107	0.00918895	0.899075	0.964404	193
ACSS1_84532	-0.00940599	0.891963	0.999491	211	0.041877	0.388594	0.879417	426									-0.0262606	0.711345	0.957192	201	0.0619621	0.251735	0.594227	344
ACSS2_55902	0.0483366	0.484948	0.999491	211	-0.032177	0.50775	0.920082	426									0.038151	0.59078	0.934786	201	-0.0208836	0.699522	0.884951	344
ACSS3_79611	0.0777194	0.261041	0.999491	211	-0.00374466	0.938574	0.991894	426									-0.0091882	0.925165	0.989814	107	-0.0337452	0.641294	0.858818	193
ACTA1_58	0.0678645	0.326561	0.999491	211	0.0391422	0.420346	0.887513	426	-0.0699069	0.352435	0.75923	179	-0.136531	0.0218303	0.160681	282	-0.0430778	0.659524	0.94923	107	0.06105	0.398999	0.715904	193
ACTA2_59	-0.00352483	0.959408	0.999491	211	0.0258151	0.595183	0.939141	426	0.00933039	0.899693	0.978859	185	-0.0201988	0.732406	0.885761	289	0.00283479	0.976881	0.996693	107	-0.0296721	0.682077	0.876453	193
ACTBL2_345651	-0.0517384	0.454713	0.999491	211	-0.10109	0.0370063	0.59955	426									-0.125141	0.19903	0.78609	107	-0.170025	0.0180807	0.181947	193
ACTB_60	0.0875921	0.206164	0.999491	210	0.0959735	0.0493506	0.641652	420	0.0297785	0.689853	0.908751	182	0.0360764	0.543431	0.775909	286	0.0749241	0.290469	0.84103	201	-0.00192131	0.971677	0.990687	344
ACTC1_70	0.0284881	0.680751	0.999491	211	0.0593507	0.221532	0.809984	426	-0.00922516	0.902454	0.979079	179	0.112394	0.0594295	0.266264	282	0.0165703	0.815392	0.9755	201	0.0126758	0.814787	0.932198	344
ACTG1P17_283693									-0.0425818	0.572505	0.869809	178	-0.0481541	0.420519	0.691573	282
ACTG1P20_644961									-0.0543594	0.471114	0.826991	178	0.00125053	0.98332	0.99484	282
ACTG1P4_648740									0.00994695	0.895161	0.977664	178	0.0524894	0.379869	0.659868	282
ACTG1_71	0.0530153	0.443643	0.999491	211	0.128669	0.0078385	0.418955	426	-0.00611938	0.934657	0.983171	182	0.0217357	0.714352	0.877223	286	0.0628266	0.375595	0.870952	201	0.0523882	0.332653	0.663681	344
ACTG2_72	-0.00304684	0.964908	0.999491	211	0.0146224	0.763467	0.967541	426	0.0717749	0.339685	0.753642	179	0.102347	0.0862398	0.32503	282	-0.0632737	0.3722	0.87012	201	0.101011	0.0612844	0.317311	344
ACTL10_170487	-0.00238381	0.972541	0.999491	211	-0.0227499	0.639618	0.948768	426
ACTL6A_86	0.0837093	0.227069	0.999491	210	0.0147024	0.763851	0.967541	420	-0.0985472	0.189374	0.632042	179	-0.120907	0.0417445	0.222519	284	0.076434	0.280829	0.835562	201	-0.0523897	0.332638	0.663681	344
ACTL6B_51412	-0.0496152	0.474521	0.999491	210	0.0335616	0.492744	0.915178	420	-0.164206	0.0280583	0.346385	179	-0.206464	0.000462045	0.0239276	284	-0.056587	0.562637	0.929648	107	0.0326814	0.651848	0.862848	193
ACTL7A_10881	-0.0250667	0.717346	0.999491	211	0.0337623	0.487057	0.911715	426									-0.0690371	0.330142	0.857132	201	-0.0344755	0.523937	0.795593	344
ACTL7B_10880	-0.0827357	0.231416	0.999491	211	0.000415877	0.993171	0.999946	426									0.0505572	0.475995	0.906664	201	0.0994453	0.0654325	0.326189	344
ACTL8_81569	-0.0896036	0.194822	0.999491	211	-0.0189725	0.696188	0.958163	426									-0.0836162	0.237945	0.814497	201	-0.00677797	0.900321	0.964814	344
ACTL9_284382	-0.15568	0.0237123	0.98243	211	-0.116444	0.0161949	0.495664	426									0.155928	0.108756	0.700816	107	0.0818211	0.257967	0.600228	193
ACTN1_87	0.0577646	0.403834	0.999491	211	0.0334586	0.490986	0.914585	426									0.0393903	0.578767	0.933029	201	0.0137607	0.799259	0.924897	344
ACTN2_88	-0.0508857	0.462191	0.999491	211	0.0273078	0.574064	0.93474	426									-0.111226	0.115962	0.702158	201	-0.0502586	0.352706	0.680605	344
ACTN3_89																	-0.102273	0.148538	0.741603	201	-0.102172	0.0583498	0.312049	344
ACTN4_81	0.00310746	0.964211	0.999491	211	-0.0624619	0.19821	0.795982	426									0.0562605	0.427612	0.890906	201	-0.0631287	0.242901	0.585584	344
ACTR10_55860	0.0109928	0.873877	0.999491	211	0.0231213	0.634161	0.947884	426									-0.0893336	0.360164	0.863559	107	-0.153318	0.0332773	0.239605	193
ACTR1A_10121	-0.0703202	0.30932	0.999491	211	0.024289	0.617132	0.943975	426									0.0833398	0.239505	0.814497	201	0.0346953	0.521293	0.793663	344
ACTR1B_10120	-0.0425074	0.539172	0.999491	211	-0.120393	0.0128959	0.471847	426									-0.0244137	0.730834	0.96279	201	-0.094832	0.0790152	0.358662	344
ACTR2_10097	-0.0099813	0.885399	0.999491	211	-0.0411669	0.396695	0.88355	426									-0.00550691	0.938156	0.990913	201	0.0880999	0.102841	0.405294	344
ACTR3BP5&ACTR3BP2_399746&440888																	0.00311305	0.974613	0.99606	107	0.103768	0.150973	0.483033	193
ACTR3B_57180	-0.0483567	0.484766	0.999491	211	0.0207656	0.6691	0.953758	426									-0.176014	0.0124401	0.49625	201	-0.105324	0.0509629	0.290842	344
ACTR3C_653857	-0.0209208	0.76256	0.999491	211	-0.040907	0.399685	0.884322	426
ACTR3_10096	-0.0527545	0.445892	0.999491	211	0.00276128	0.954685	0.994806	426									0.0324457	0.647493	0.946989	201	0.10223	0.0582064	0.311916	344
ACTR5_79913	-0.0376302	0.587646	0.999491	210	-0.0810462	0.0971698	0.704508	420	-0.0258287	0.731447	0.928122	179	-0.08447	0.155674	0.434409	284	0.0164671	0.816522	0.975599	201	0.017858	0.741371	0.902356	344
ACTR6_64431	0.0217131	0.754424	0.999491	210	0.0530257	0.278264	0.841137	420	-0.00968404	0.897627	0.978859	179	0.0136421	0.818948	0.927847	284	0.0557654	0.431696	0.891713	201	-0.00388975	0.942696	0.980084	344
ACTR8_93973	0.0582315	0.401171	0.999491	210	-0.00734104	0.880765	0.98639	420	0.00217923	0.976903	0.994994	179	0.0454513	0.445478	0.709293	284	0.15485	0.111253	0.700846	107	0.0655393	0.365169	0.690256	193
ACTRT1_139741	-0.148195	0.0314158	0.98243	211	-0.0760177	0.117198	0.730494	426									0.130774	0.179396	0.779922	107	0.0455443	0.52939	0.799164	193
ACTRT2_140625	-0.00526016	0.939455	0.999491	211	0.0676627	0.163307	0.775001	426									0.0322838	0.649134	0.947063	201	-0.0270794	0.616715	0.845584	344
ACTRT3_84517	0.0820164	0.235512	0.999491	211	0.0516592	0.287414	0.846268	426	0.0135763	0.856858	0.965368	179	-0.0645415	0.278362	0.573919	284	0.0172135	0.808362	0.974209	201	0.0149948	0.781692	0.91756	344
ACVR1B_91	-0.0136089	0.844207	0.999491	211	-0.01134	0.81547	0.977154	426	-0.174822	0.0192513	0.30875	179	-0.17367	0.00332282	0.0660835	284	0.0588593	0.406545	0.88392	201	0.0772359	0.15288	0.485892	344
ACVR1C_130399	-0.020324	0.769141	0.999491	211	-0.0532784	0.272553	0.837937	426	0.0082496	0.912973	0.981313	178	-0.0265452	0.657137	0.843196	282	-0.0450557	0.525355	0.923009	201	-0.0141432	0.793803	0.922903	344
ACVR1_90	0.0186639	0.787528	0.999491	211	0.0167445	0.730387	0.964022	426	0.0880164	0.241356	0.680702	179	0.14791	0.0125826	0.123732	284	0.00166542	0.98128	0.997776	201	-0.0542829	0.31544	0.650198	344
ACVR2A_92	-0.123063	0.0744631	0.987144	211	-0.089367	0.0653608	0.666528	426	-0.0774665	0.302672	0.727928	179	0.0774311	0.193227	0.482173	284	-0.0255963	0.718334	0.958617	201	0.00949807	0.860667	0.950779	344
ACVR2B_93	0.0852303	0.217601	0.999491	211	0.0171547	0.724048	0.962865	426	0.0182503	0.808407	0.950751	179	0.0953252	0.108931	0.364442	284	0.0460087	0.516622	0.919442	201	0.0685086	0.204973	0.549932	344
ACVRL1_94	0.0850334	0.21867	0.999491	211	0.0202825	0.676358	0.955029	426	-0.02345	0.755356	0.934383	179	0.0132123	0.824559	0.929713	284	0.0751663	0.288908	0.84103	201	0.0351724	0.515578	0.789672	344
ACY1_95	0.0533201	0.441023	0.999491	211	0.0162118	0.738646	0.964906	426									-0.138937	0.0491786	0.614825	201	-0.11442	0.0338856	0.241084	344
ACY3_91703	-0.0704905	0.308147	0.999491	211	0.0251229	0.605094	0.941251	426									-0.127822	0.0705585	0.661018	201	-0.0844112	0.118126	0.431732	344
ACYP1_97	0.0913667	0.186148	0.999491	211	-0.023288	0.631717	0.94768	426									0.0751886	0.288764	0.84103	201	0.00808071	0.881292	0.95785	344
ACYP2_98	0.0435732	0.529037	0.999491	211	0.0651143	0.179785	0.783279	426	0.0560653	0.456009	0.818948	179	0.039169	0.510905	0.756352	284	0.0144088	0.839122	0.978031	201	-0.00698207	0.897335	0.963958	344
ADA2_51816	-0.00655717	0.924566	0.999491	211	0.018859	0.697916	0.959019	426									-0.0590967	0.404651	0.883402	201	-0.0405168	0.453829	0.7555	344
ADAD1_132612	-0.100943	0.14393	0.999491	211	-0.0970072	0.0453876	0.62729	426									-0.0414205	0.671853	0.952762	107	0.0434081	0.5489	0.810513	193
ADAD2_161931	0.0729484	0.291541	0.999491	211	0.0105268	0.82849	0.978505	426									-0.0127613	0.857309	0.97998	201	-0.0111034	0.83742	0.94065	344
ADAL_161823	-0.0342556	0.620754	0.999491	211	0.0886559	0.0675403	0.669821	426									0.0663363	0.497216	0.915772	107	0.114242	0.113656	0.424196	193
ADAM10_102	0.0527909	0.445577	0.999491	211	0.068559	0.157789	0.771883	426
ADAM11_4185	0.00277509	0.968036	0.999491	211	0.0760394	0.117093	0.730494	426									-0.175236	0.0128397	0.497298	201	-0.141584	0.00854602	0.131344	344
ADAM12_8038	0.130918	0.0576202	0.983399	211	-0.0426577	0.379804	0.877028	426	-0.0645792	0.391766	0.782382	178	-0.0518175	0.386007	0.666177	282	0.0295971	0.676616	0.953169	201	-0.0600508	0.266687	0.608575	344
ADAM15_8751	0.0548503	0.428004	0.999491	211	0.0089883	0.853249	0.983289	426									0.0438465	0.536541	0.925568	201	0.0745851	0.167514	0.50453	344
ADAM17_6868	-0.0223545	0.746824	0.999491	211	-0.0238286	0.623821	0.945076	426	-0.0813338	0.2791	0.706618	179	-0.0862261	0.148671	0.424277	282	0.0493057	0.486998	0.911901	201	0.0759983	0.159587	0.494888	344
ADAM18_8749	0.0395628	0.567665	0.999491	211	0.0222956	0.646319	0.950379	426									-0.0870882	0.21895	0.798819	201	-0.141941	0.00837941	0.130037	344
ADAM19_8728	-0.0747455	0.279785	0.999491	211	-0.0796025	0.100848	0.707021	426									0.124029	0.0793922	0.666253	201	0.0383087	0.478825	0.76868	344
ADAM20_8748	-0.00406223	0.953225	0.999491	211	-0.0622933	0.199426	0.796207	426									0.0176408	0.803701	0.973361	201	0.00938185	0.862354	0.951574	344
ADAM21_8747	-0.132833	0.0540301	0.983399	211	-0.0415187	0.392669	0.881149	426									-0.113535	0.10854	0.700816	201	-0.0796046	0.14064	0.46689	344
ADAM22_53616	0.0252847	0.714993	0.999491	211	0.0172027	0.723307	0.962843	426									-0.015966	0.82201	0.976294	201	0.0241336	0.655563	0.865152	344
ADAM23_8745	-0.115328	0.0947494	0.999491	211	-0.0930276	0.0550363	0.648988	426	0.00560226	0.940669	0.984364	179	0.00406364	0.945642	0.980944	284	-0.140569	0.046549	0.607379	201	-0.157808	0.00333918	0.0861598	344
ADAM28_10863	-0.0602174	0.384135	0.999491	211	-0.0110253	0.820504	0.977494	426									-0.0470188	0.507448	0.917827	201	-0.0846741	0.116981	0.42965	344
ADAM29_11086	-0.118318	0.0864404	0.999491	211	-0.113302	0.019325	0.518739	426									-0.0700121	0.323341	0.856403	201	0.0738935	0.171499	0.510343	344
ADAM2_2515	0.0706622	0.306967	0.999491	211	0.0673826	0.16506	0.776407	426									-0.0302987	0.669396	0.951857	201	-0.000344788	0.994916	0.997671	344
ADAM30_11085	-0.0387097	0.576052	0.999491	211	0.0112117	0.817522	0.977154	426	0.13283	0.0763016	0.470251	179	0.138546	0.0199391	0.153849	282	0.000329582	0.996295	0.999723	201	-0.0417552	0.440137	0.745878	344
ADAM32_203102	0.0707242	0.306541	0.999491	211	0.101062	0.0370603	0.59955	426									0.0208063	0.76939	0.968617	201	-0.0872539	0.1062	0.41102	344
ADAM33_80332	0.0318349	0.645661	0.999491	211	0.0784799	0.105761	0.715071	426									-0.000544009	0.993885	0.999333	201	-0.0826837	0.12587	0.444099	344
ADAM7_8756	0.0594747	0.390038	0.999491	211	0.0178091	0.713973	0.962171	426									-0.0996766	0.159174	0.754445	201	-0.0477719	0.377066	0.699868	344
ADAM8_101	0.0648236	0.348754	0.999491	211	-0.00543679	0.910914	0.990242	426									-0.00706936	0.920661	0.989814	201	0.000636258	0.990619	0.996746	344
ADAM9_8754	-0.0199516	0.773254	0.999491	211	0.00446365	0.926811	0.99073	426									-0.0578202	0.414893	0.886244	201	0.0594824	0.271248	0.613276	344
ADAMDEC1_27299	0.0236545	0.732646	0.999491	211	0.0562755	0.246449	0.822834	426									-0.214704	0.00220789	0.333271	201	-0.0719241	0.183234	0.525071	344
ADAMTS10_81794	-0.0301693	0.663033	0.999491	211	-0.0363879	0.45381	0.900999	426	-0.0661253	0.379151	0.775157	179	0.0339754	0.56854	0.793875	284	0.00941002	0.894525	0.984775	201	0.067535	0.211498	0.556348	344
ADAMTS12_81792	0.00566192	0.934841	0.999491	211	0.0489701	0.313279	0.851691	426									-0.0676609	0.339896	0.858514	201	-0.089552	0.0972712	0.396141	344
ADAMTS13_11093	0.0772364	0.264025	0.999491	211	0.148154	0.00217071	0.303022	426									0.0256227	0.718056	0.958617	201	0.0381349	0.480823	0.769862	344
ADAMTS14_140766	-0.0698952	0.31226	0.999491	211	-0.0319162	0.511197	0.921461	426									-0.0112349	0.874226	0.98291	201	0.00460944	0.932117	0.97604	344
ADAMTS15_170689	0.0229774	0.74002	0.999491	211	-0.0299328	0.53781	0.924047	426									-0.0405823	0.567321	0.93105	201	-0.121687	0.0239995	0.204846	344
ADAMTS16_170690	-0.00767154	0.911795	0.999491	211	0.0111926	0.817826	0.977154	426									0.144723	0.0403835	0.60281	201	0.186569	0.000504548	0.0387784	344
ADAMTS17_170691	-0.0348024	0.615187	0.999491	211	-0.0379314	0.434875	0.892858	426									-0.0911196	0.198281	0.78609	201	-0.116083	0.0313613	0.233973	344
ADAMTS18_170692	-0.0036468	0.958004	0.999491	211	0.0100171	0.836674	0.979788	426									0.0989263	0.162352	0.760259	201	0.0377972	0.48472	0.771714	344
ADAMTS19_171019	0.0810083	0.241338	0.999491	211	0.00765318	0.874852	0.98639	426									0.106139	0.133709	0.729908	201	0.0337025	0.53329	0.802281	344
ADAMTS1_9510	0.0815725	0.238065	0.999491	211	0.0397358	0.413328	0.886001	426									0.047207	0.505749	0.917827	201	-0.0651756	0.227929	0.5709	344
ADAMTS20_80070	0.0602111	0.384185	0.999491	211	0.0445046	0.359499	0.870304	426	-0.0591712	0.431399	0.80515	179	0.00471347	0.936967	0.976772	284	0.138861	0.0493035	0.61556	201	0.0834457	0.122407	0.439066	344
ADAMTS2_9509	-0.0326325	0.63741	0.999491	211	-0.0677055	0.16304	0.774864	426									-0.0363026	0.608905	0.939927	201	-0.0345519	0.523017	0.794788	344
ADAMTS3_9508	0.00576835	0.933619	0.999491	211	-0.0491703	0.311302	0.850849	426	0.057912	0.44258	0.811967	178	0.0754249	0.206671	0.49887	282	-0.0253071	0.721384	0.959366	201	-0.014038	0.795303	0.923572	344
ADAMTS4_9507	0.0459966	0.506357	0.999491	211	0.0408629	0.400194	0.884322	426									0.0185597	0.793699	0.971804	201	0.00565946	0.916704	0.969704	344
ADAMTS5_11096	0.0463482	0.503108	0.999491	211	0.0672475	0.165911	0.777463	426									-0.0241901	0.733206	0.963044	201	0.0313885	0.561783	0.819134	344
ADAMTS6_11174	-0.0601004	0.385061	0.999491	211	-0.0308645	0.525223	0.922403	426									0.126622	0.0732613	0.665116	201	0.0141649	0.793493	0.922858	344
ADAMTS7_11173	-0.0226957	0.743095	0.999491	211	0.0272042	0.575519	0.935181	426									0.033716	0.634672	0.944441	201	0.0228489	0.672808	0.872928	344
ADAMTS8_11095	0.196492	0.00416693	0.953229	211	0.126635	0.00888149	0.430011	426									0.033546	0.636382	0.944441	201	-0.0343921	0.524943	0.796275	344
ADAMTS9_56999	0.016847	0.807788	0.999491	211	0.019283	0.691468	0.957701	426									0.0161126	0.820403	0.975794	201	0.0771212	0.153492	0.486442	344
ADAMTSL1_92949	0.0387171	0.575979	0.999491	211	0.0250185	0.606595	0.941539	426									-0.0524952	0.591263	0.934787	107	0.0278709	0.700419	0.884953	193
ADAMTSL2_9719	0.0714573	0.301542	0.999491	211	0.0108606	0.82314	0.978063	426									0.0649495	0.506272	0.917827	107	-0.0454631	0.530125	0.79945	193
ADAMTSL3_57188	0.0690445	0.318201	0.999491	211	-0.0330607	0.496159	0.916215	426	0.0171902	0.81934	0.954046	179	0.0130155	0.82713	0.931164	284	-0.135254	0.164821	0.762304	107	0.0227833	0.753141	0.907596	193
ADAMTSL4_54507	0.108329	0.116685	0.999491	211	0.0341148	0.482519	0.911418	426									0.00139691	0.984298	0.99785	201	-0.111598	0.0385674	0.256016	344
ADAMTSL5_339366	0.0294083	0.67103	0.999491	211	0.0853735	0.0783863	0.682598	426	0.0254802	0.734935	0.928165	179	0.0611134	0.306466	0.601087	282	0.100385	0.303575	0.847027	107	0.0889014	0.218895	0.561692	193
ADAP1_11033	0.085593	0.215643	0.999491	211	0.0185411	0.702763	0.959929	426									0.0649398	0.506335	0.917827	107	0.0820172	0.256824	0.59896	193
ADAP2_55803	-0.00735777	0.915389	0.999491	211	0.0225585	0.642437	0.948991	426	0.0441908	0.558069	0.863021	178	0.181739	0.00218464	0.0533	282	0.0393707	0.687223	0.954452	107	-0.0202305	0.78005	0.917174	193
ADARB1_104	0.155593	0.0237919	0.98243	211	0.0761851	0.116391	0.730259	426	-0.0104113	0.889986	0.976115	179	0.0203176	0.733161	0.885761	284	0.0803802	0.256662	0.82452	201	0.047793	0.376854	0.699711	344
ADARB2_105	0.0114957	0.868158	0.999491	211	-0.0426949	0.379388	0.877028	426									0.161878	0.0216836	0.533474	201	0.0890512	0.0991642	0.399801	344
ADAR_103	0.131506	0.0564967	0.983399	211	0.122376	0.0114748	0.457901	426	0.102813	0.170832	0.614354	179	0.158205	0.00755789	0.101472	284	0.0792307	0.263549	0.82864	201	0.125695	0.0196969	0.187737	344
ADAT1_23536	0.0126643	0.854897	0.999491	211	0.052332	0.281175	0.843058	426									-0.0568151	0.423064	0.889442	201	0.0158852	0.769084	0.912165	344
ADAT2_134637	-0.00811491	0.906719	0.999491	211	0.0787157	0.104714	0.714752	426									0.0298539	0.67397	0.953169	201	0.0353544	0.513406	0.788823	344
ADAT3_113179	-0.0299061	0.665795	0.999491	211	0.0569521	0.240805	0.822159	426									-0.0691342	0.329461	0.857132	201	-0.0834405	0.12243	0.439066	344
ADA_100	0.00496112	0.942891	0.999491	211	0.0376852	0.437865	0.894974	426									0.123079	0.0817382	0.671199	201	0.00482542	0.928944	0.974789	344
ADCK1_57143	0.085571	0.215761	0.999491	211	0.0220443	0.650039	0.951146	426	0.107305	0.152799	0.592978	179	-0.0490365	0.412046	0.686853	282	0.0317413	0.654646	0.94875	201	0.0330368	0.541413	0.806708	344
ADCK2_90956	-0.0322131	0.641743	0.999491	211	0.0285964	0.556123	0.927606	426	0.131069	0.0811793	0.484222	178	-0.0704277	0.238441	0.531461	282	-0.0134094	0.850145	0.979703	201	0.0687241	0.203549	0.548832	344
ADCK5_203054	0.0763228	0.269733	0.999491	211	0.0745344	0.124541	0.740647	426	0.021476	0.775377	0.942097	179	0.0857761	0.15081	0.426693	282	-0.0745646	0.292796	0.842247	201	-0.0662974	0.220008	0.563333	344
ADCY10_55811	0.10742	0.119802	0.999491	211	0.0602237	0.214799	0.804004	426	0.0327809	0.663111	0.898633	179	0.00712323	0.905204	0.964686	282	-0.0292427	0.680274	0.953169	201	-0.0677998	0.209709	0.555109	344
ADCY1_107	0.0393741	0.569516	0.999491	211	0.0423883	0.382823	0.877883	426	-0.0187268	0.800263	0.94977	185	-0.00536249	0.927677	0.972683	289	0.0252514	0.721972	0.959366	201	0.0200975	0.710314	0.888452	344
ADCY2_108	0.129953	0.0595023	0.983399	211	0.0162063	0.738732	0.964906	426	-0.158914	0.0302752	0.356761	186	-0.13617	0.0201402	0.153849	291	0.162002	0.0215817	0.533474	201	0.0584479	0.279686	0.62118	344
ADCY3_109	0.0036168	0.958349	0.999491	211	0.056689	0.242989	0.822159	426	-0.119575	0.110864	0.538233	179	-0.0994492	0.0955638	0.342417	282	0.00810325	0.909104	0.988179	201	0.0507394	0.348113	0.67664	344
ADCY4_196883	0.114072	0.0984225	0.999491	211	0.0788683	0.10404	0.714307	426	-0.0599459	0.425382	0.802755	179	-0.0873053	0.143635	0.418379	282	0.157679	0.0253818	0.55374	201	0.171268	0.00142975	0.0608666	344
ADCY5_111	0.159282	0.0206261	0.98243	211	0.0373464	0.441998	0.895628	426	0.0950572	0.205607	0.647748	179	-0.0546045	0.360941	0.645331	282	0.0603731	0.394561	0.880745	201	0.0594869	0.271212	0.613276	344
ADCY6_112	-0.0215138	0.75604	0.999491	211	0.0172771	0.72216	0.962843	426	0.0716275	0.342052	0.754341	178	0.0190849	0.749655	0.893942	282	0.081875	0.247894	0.819469	201	0.126721	0.0187105	0.184409	344
ADCY7_113	-0.0838894	0.224952	0.999491	211	0.049323	0.3098	0.850366	426	-0.143616	0.0511438	0.42296	185	-0.127845	0.0297901	0.187807	289	-0.0311522	0.660653	0.949614	201	-0.00724749	0.893455	0.96206	344
ADCY8_114	0.0404503	0.559002	0.999491	211	-0.0455977	0.347808	0.868349	426	0.0500643	0.505706	0.843901	179	0.0133072	0.823938	0.929674	282	0.06722	0.34306	0.859032	201	-0.0251382	0.642204	0.859092	344
ADCY9_115	0.0803872	0.244977	0.999491	211	0.0106845	0.825962	0.978505	426	0.0642738	0.394015	0.783661	178	0.135743	0.022611	0.162746	282	0.0747419	0.291647	0.842216	201	0.130454	0.0154732	0.169558	344
ADCYAP1R1_117	0.0141091	0.838558	0.999491	211	0.0924702	0.0565149	0.648988	426									0.013991	0.843727	0.978031	201	-0.122632	0.0229183	0.201987	344
ADCYAP1_116	0.0816901	0.237387	0.999491	211	0.106467	0.0280035	0.568936	426									0.0295065	0.67755	0.953169	201	-0.0419871	0.4376	0.744591	344
ADD1_118	0.0480314	0.487712	0.999491	211	-0.00733034	0.880091	0.98639	426									0.183157	0.0092532	0.466553	201	0.0938577	0.0821572	0.364541	344
ADD2_119	0.0499826	0.470185	0.999491	211	0.0414709	0.393215	0.881438	426									-0.0573771	0.557186	0.927263	107	-0.115347	0.110183	0.417483	193
ADD3_120	0.172438	0.0121158	0.98243	211	0.00526966	0.913642	0.990242	426									-0.0948386	0.331206	0.857396	107	0.106031	0.142212	0.469878	193
ADGRA1_84435	-0.00450559	0.948127	0.999491	211	0.0230683	0.634938	0.947884	426									0.118607	0.0935471	0.681865	201	0.0375958	0.487051	0.773656	344
ADGRA2_25960	0.127057	0.0654581	0.987144	211	0.0921588	0.0573551	0.649531	426									0.00341265	0.961652	0.993331	201	-0.104047	0.053856	0.299185	344
ADGRA3_166647	-0.0175763	0.79964	0.999491	211	-0.00305702	0.949837	0.993829	426									0.00775328	0.936826	0.990729	107	-0.0235944	0.744651	0.903972	193
ADGRB1_575	0.0875058	0.205522	0.999491	211	0.0516432	0.287564	0.846268	426	-0.155306	0.0384509	0.387669	178	-0.161145	0.00669164	0.0947883	282	0.0683949	0.334671	0.858398	201	-0.0267213	0.621383	0.8481	344
ADGRB2_576	0.0985879	0.153567	0.999491	211	0.0224072	0.64467	0.950164	426									0.0139338	0.844357	0.978098	201	0.0624798	0.247788	0.590736	344
ADGRB3_577	0.0377165	0.585889	0.999491	211	0.0520725	0.28357	0.84354	426	0.0801387	0.278204	0.706537	185	-0.00393046	0.946957	0.981386	289	0.0492343	0.487629	0.91203	201	0.0577042	0.28586	0.626626	344
ADGRD1_283383	-0.156794	0.0227176	0.98243	211	-0.0502803	0.300491	0.847511	426									-0.034529	0.626524	0.943551	201	-0.118169	0.0284225	0.223505	344
ADGRD2_347088																	0.0507995	0.473882	0.905448	201	-0.0110578	0.838079	0.940964	344
ADGRE1_2015	0.0516231	0.45572	0.999491	211	-0.0278627	0.566306	0.93178	426									0.0473612	0.504358	0.917827	201	0.0601925	0.265558	0.607429	344
ADGRE2_30817	-0.0245509	0.722921	0.999491	211	-0.0294324	0.544631	0.9244	426	0.110933	0.139313	0.57566	179	0.0823086	0.168081	0.452547	282	-0.0512007	0.470392	0.903521	201	-0.0449933	0.405473	0.720313	344
ADGRE3_84658	0.0401668	0.561763	0.999491	211	0.0677098	0.163013	0.774864	426									0.0199002	0.779169	0.97049	201	-0.0838213	0.120728	0.435383	344
ADGRE4P_326342																	-0.0411772	0.56165	0.929648	201	-0.0655071	0.225568	0.568751	344
ADGRE5_976	-0.0916064	0.184991	0.999491	211	-0.0117327	0.809201	0.976608	426	-0.0836727	0.265461	0.69794	179	-0.0713126	0.232578	0.52574	282	0.0101403	0.886393	0.98457	201	-0.0240189	0.657096	0.86581	344
ADGRF1_266977	0.0461948	0.504524	0.999491	211	0.0885431	0.0678913	0.672439	426	-0.202703	0.00650263	0.21518	179	-0.181104	0.0022654	0.0544174	282	0.085928	0.225173	0.803016	201	-0.101582	0.0598251	0.31517	344
ADGRF2_222611																	-0.0286318	0.686598	0.954268	201	0.0126203	0.815583	0.932329	344
ADGRF3_165082	-0.0628266	0.363833	0.999491	211	0.0103301	0.831646	0.978803	426									-0.131694	0.0623834	0.641215	201	-0.177495	0.000945209	0.0518729	344
ADGRF4_221393	0.0600511	0.385452	0.999491	211	0.0200458	0.679924	0.955226	426									0.056831	0.422934	0.889442	201	0.0120366	0.823971	0.93573	344
ADGRF5_221395	0.0793382	0.251209	0.999491	211	0.0626011	0.19721	0.795629	426	0.0776146	0.292352	0.717612	186	-0.0280012	0.634286	0.831012	291	0.0563231	0.427098	0.890749	201	-0.0657977	0.223512	0.567502	344
ADGRG1_9289	0.0213274	0.758088	0.999491	211	0.0243045	0.616907	0.943975	426									-0.0339609	0.632213	0.944371	201	-0.0221649	0.682062	0.876453	344
ADGRG2_10149	-0.0533468	0.440794	0.999491	211	-0.0419604	0.387649	0.879075	426	0.0366882	0.61908	0.884917	186	0.0264421	0.653283	0.840645	291	-0.0429567	0.544848	0.925568	201	-0.040173	0.457672	0.757284	344
ADGRG3_222487	-0.0162621	0.814339	0.999491	211	-0.000204265	0.996646	0.999949	426									0.0689648	0.33065	0.857386	201	0.0253838	0.638954	0.857757	344
ADGRG4_139378	-0.0930949	0.177923	0.999491	211	-0.0552132	0.255493	0.828421	426									0.0388706	0.58379	0.933029	201	0.0516826	0.339214	0.668755	344
ADGRG5_221188	0.0796781	0.249178	0.999491	211	0.125207	0.009686	0.436286	426									0.0266982	0.706755	0.957058	201	-0.0432065	0.424397	0.734565	344
ADGRG6_57211	-0.0796377	0.249418	0.999491	211	-0.0113099	0.815952	0.977154	426									-0.0291488	0.681245	0.953282	201	-0.148942	0.00564246	0.108916	344
ADGRG7_84873	-0.00295755	0.965936	0.999491	211	0.0287716	0.553705	0.926828	426									0.0733678	0.300633	0.845264	201	-0.0182593	0.735773	0.899583	344
ADGRL1_22859	-0.0346464	0.616773	0.999491	211	0.01326	0.784938	0.972245	426									-0.0705254	0.319798	0.855742	201	-0.0763994	0.157389	0.491896	344
ADGRL2_23266	-0.0972589	0.159216	0.999491	211	-0.0445776	0.358711	0.870304	426									0.0390603	0.581955	0.933029	201	-0.00689945	0.898543	0.964281	344
ADGRL3_23284	0.000628421	0.99276	0.999963	211	-0.0342415	0.480894	0.911418	426	0.0238893	0.746867	0.932602	185	-0.000579134	0.992179	0.997683	289	-0.0783754	0.268755	0.830191	201	-0.0517048	0.339006	0.668648	344
ADGRL4_64123	0.0632573	0.360547	0.999491	211	0.0552086	0.255533	0.828421	426									-0.131372	0.0630311	0.642315	201	-0.0983523	0.0684636	0.333881	344
ADGRV1_84059	-0.0294218	0.670888	0.999491	211	-0.0194168	0.689438	0.957389	426	-0.0338267	0.65397	0.895674	178	0.0439731	0.462029	0.721113	282	0.0677245	0.339441	0.858514	201	0.0940447	0.0815465	0.363882	344
ADH1A_124	-0.0267047	0.699739	0.999491	211	-0.0672685	0.165778	0.777463	426	-0.0802313	0.285691	0.713555	179	0.0209784	0.725768	0.883395	282	0.0078324	0.91213	0.988591	201	0.0325988	0.54679	0.809668	344
ADH1B_125	-0.0672006	0.331327	0.999491	211	-0.0555207	0.252852	0.826709	426	0.0827051	0.271047	0.699758	179	0.0676161	0.257752	0.553615	282	0.12048	0.0884458	0.67819	201	0.132863	0.0136549	0.158867	344
ADH1C_126									0.0797386	0.288669	0.716729	179	0.0734316	0.218956	0.511925	282	-0.0203833	0.773951	0.969689	201	-0.00639565	0.905916	0.966335	344
ADH4_127	-0.146416	0.0335319	0.98243	211	-0.0428235	0.377952	0.877028	426	0.0762643	0.311634	0.734573	178	0.117851	0.0480228	0.239065	282	-0.044174	0.533499	0.925178	201	-0.00824285	0.878928	0.957269	344
ADH5_128	0.017647	0.798851	0.999491	211	0.0146053	0.763734	0.967541	426	-0.0560523	0.456114	0.818948	179	-0.139658	0.0189587	0.150444	282	-0.128744	0.068536	0.65731	201	-0.130637	0.0153277	0.168736	344
ADH6_130	-0.0355325	0.607787	0.999491	211	-0.0983253	0.0425229	0.62185	426	0.0258235	0.7315	0.928122	179	0.124351	0.0368842	0.210108	282	0.052571	0.45858	0.898748	201	0.0332104	0.539289	0.805648	344
ADH7_131	0.0011296	0.986986	0.999491	211	0.0377625	0.436925	0.894535	426	0.0931509	0.214886	0.658259	179	-0.0314171	0.599326	0.810209	282	0.087	0.219419	0.798819	201	0.0833372	0.122895	0.439606	344
ADHFE1_137872	0.126883	0.0664815	0.987144	210	0.0545827	0.264374	0.832753	420									0.124466	0.0783293	0.665116	201	0.137172	0.0108669	0.143517	344
ADI1_55256	0.0583676	0.40007	0.999491	210	0.0438431	0.370109	0.872951	420									-0.0142999	0.840322	0.978031	201	0.0902053	0.0948448	0.392183	344
ADIG_149685	0.0172894	0.802842	0.999491	211	-0.0533773	0.271663	0.837279	426									0.159085	0.101693	0.6916	107	0.144564	0.0448722	0.273992	193
ADIPOQ_9370	-0.0916578	0.184743	0.999491	211	-0.00484458	0.920584	0.990242	426	0.0974308	0.195731	0.640522	178	0.075039	0.209009	0.501026	282	-0.143522	0.140264	0.737247	107	-0.105273	0.145101	0.474708	193
ADIPOR1_51094	-0.0251979	0.71593	0.999491	211	0.0448667	0.355599	0.868967	426	0.0771899	0.304407	0.728864	179	0.0514721	0.387494	0.666843	284	-0.0516552	0.466456	0.90159	201	0.0329866	0.542028	0.806974	344
ADIPOR2_79602	0.0711117	0.303892	0.999491	211	-0.0308856	0.524939	0.922355	426	-0.0281544	0.703633	0.914992	185	-0.0643418	0.275625	0.57174	289	-0.0819807	0.247282	0.819302	201	-0.0111073	0.837364	0.94065	344
ADIRF_10974	0.131657	0.0562119	0.983399	211	0.0718671	0.138639	0.754297	426									0.127863	0.0704669	0.661018	201	0.181171	0.000735579	0.0485221	344
ADK_132	-0.072804	0.292499	0.999491	211	-0.0172659	0.722332	0.962843	426	0.0652605	0.38678	0.778145	178	-0.0638692	0.285126	0.581236	282	0.0359295	0.612593	0.940122	201	0.0309624	0.56711	0.82196	344
ADM2_79924	-0.0272602	0.693804	0.999491	211	-0.0467472	0.335777	0.864464	426	0.033977	0.65161	0.895674	179	-0.0226743	0.703591	0.872243	284	-0.0826174	0.397546	0.882671	107	-0.135577	0.0601154	0.315902	193
ADM5_199800	-0.106188	0.124131	0.999491	211	-0.114888	0.0176848	0.502788	426
ADM_133	-0.0533904	0.44042	0.999491	211	0.0567651	0.242356	0.822159	426	-0.071974	0.338344	0.753642	179	-0.132657	0.0253778	0.172686	284	0.143386	0.0422888	0.606457	201	0.117895	0.0287942	0.225432	344
ADNP2_22850	-0.0876861	0.204587	0.999491	211	-0.00558101	0.908561	0.98998	426									0.0221724	0.754717	0.966559	201	-0.0174152	0.747565	0.904799	344
ADNP_23394	0.0918695	0.183727	0.999491	211	0.00415416	0.931872	0.990823	426	0.0926841	0.217203	0.660891	179	0.183536	0.00189774	0.0491399	284	0.131654	0.0624627	0.641215	201	0.10975	0.0419209	0.264751	344
ADORA1_134	-0.00510822	0.941201	0.999491	211	-0.0222059	0.647646	0.950497	426	0.0369014	0.617043	0.884917	186	0.0350009	0.552056	0.781429	291	0.0745162	0.29311	0.842247	201	0.0557697	0.302348	0.640759	344
ADORA2A_135	0.0454609	0.511326	0.999491	211	0.0275691	0.570404	0.933453	426									0.0848242	0.231209	0.808244	201	0.147322	0.00619227	0.114516	344
ADORA2B_136	0.0950154	0.169103	0.999491	211	0.0168214	0.729197	0.964022	426	0.0202458	0.788516	0.946549	178	-0.01346	0.821949	0.929398	282	0.0319657	0.652363	0.947897	201	0.0945132	0.0800322	0.360371	344
ADORA3&TMIGD3_140&57413									-0.0917266	0.222011	0.666042	179	-0.0293166	0.623973	0.825771	282
ADORA3_140																	0.0407152	0.566052	0.930819	201	0.0779229	0.149249	0.480806	344
ADO_84890	-0.0445418	0.520913	0.999491	210	0.011128	0.820125	0.977494	420
ADPGK_83440	0.000841455	0.990306	0.99963	211	0.0238881	0.622956	0.944942	426	0.12561	0.0947882	0.510768	178	0.156965	0.00827678	0.104995	282	0.16779	0.0172702	0.512884	201	-0.0336028	0.534503	0.8031	344
ADPRHL1_113622	-0.0615255	0.373872	0.999491	211	-0.0346385	0.475818	0.90957	426									0.0230537	0.82544	0.976427	94	-0.0707925	0.387715	0.707875	151
ADPRHL2_54936	0.0929633	0.17854	0.999491	211	0.0101384	0.834726	0.979496	426									-0.0368869	0.603149	0.937818	201	-0.00395844	0.941686	0.979818	344
ADPRH_141	0.0265406	0.701496	0.999491	211	-0.0511289	0.292397	0.847156	426									-2.47782e-05	0.999721	0.999827	201	0.0855329	0.113301	0.423269	344
ADPRM_56985	-0.0968492	0.160988	0.999491	211	0.0416118	0.391608	0.880404	426	-0.0450961	0.54889	0.861317	179	-0.00451478	0.939833	0.978993	282	-0.0475312	0.502828	0.916998	201	-0.0548483	0.310418	0.646476	344
ADRA1A_148	-0.0488207	0.48058	0.999491	211	-0.023428	0.629668	0.947086	426	-0.108562	0.14802	0.586127	179	-0.081662	0.171458	0.458391	282	0.0645385	0.362699	0.864447	201	-0.0516013	0.339975	0.669408	344
ADRA1B_147	-0.0507612	0.463289	0.999491	211	0.0535194	0.270387	0.837141	426	0.00186951	0.980185	0.995539	179	0.000870897	0.988383	0.997103	282	-0.0696461	0.325884	0.857114	201	0.0277824	0.607595	0.842267	344
ADRA1D_146	0.0854546	0.216389	0.999491	211	0.0228241	0.638526	0.948439	426	0.0793785	0.292229	0.717612	178	0.103844	0.0817195	0.315638	282	0.0197807	0.780461	0.970763	201	-0.0339815	0.529905	0.799438	344
ADRA2A_150	-0.0245199	0.723257	0.999491	211	-0.00803608	0.868646	0.984977	426	-0.00770406	0.918707	0.981313	178	-0.000795076	0.989395	0.997103	282	0.0451872	0.524145	0.921806	201	0.12583	0.0195652	0.187119	344
ADRA2B_151	-0.0657111	0.34218	0.999491	211	-0.0785473	0.105461	0.715071	426	-0.0110606	0.883501	0.973059	178	-0.0709513	0.23496	0.527595	282	-0.0573469	0.418729	0.888233	201	-0.0638127	0.237823	0.579428	344
ADRA2C_152	-0.147612	0.0320962	0.98243	211	-0.0374946	0.440187	0.894974	426	-0.0962439	0.201258	0.645586	178	-0.0771869	0.196233	0.484925	282	-0.056978	0.421733	0.888884	201	-0.110392	0.0407304	0.261571	344
ADRB1_153	-0.00974096	0.88814	0.999491	211	0.0186394	0.701263	0.959327	426	-0.0206282	0.784619	0.944412	178	-0.0445182	0.456491	0.717364	282	-0.00900755	0.899012	0.985515	201	0.0386093	0.475379	0.766748	344
ADRB2_154	0.0351633	0.611523	0.999491	211	-0.00230716	0.962131	0.996262	426	-0.0971404	0.197073	0.641807	178	-0.0608208	0.308791	0.601958	282	0.082281	0.245549	0.815657	201	0.15475	0.00401371	0.0912037	344
ADRB3_155	-0.0296363	0.668631	0.999491	211	0.0613499	0.206331	0.801143	426	-0.0371566	0.621441	0.884917	179	-0.0654023	0.273698	0.57174	282	0.134947	0.0561312	0.629395	201	0.0535826	0.321733	0.655314	344
ADRM1_11047	0.0293882	0.671985	0.999491	210	0.0264228	0.589207	0.939141	420	-0.0221259	0.76436	0.938036	186	0.0911284	0.120884	0.38273	291	0.110086	0.119772	0.706255	201	0.0900541	0.095402	0.392926	344
ADSL_158	0.0349028	0.614167	0.999491	211	0.0341932	0.481513	0.911418	426	0.0519085	0.482854	0.832766	185	0.00977487	0.868585	0.94799	289	0.147333	0.036871	0.600066	201	0.179031	0.000851647	0.0506988	344
ADSSL1_122622	-0.0621719	0.368864	0.999491	211	-0.0594666	0.22063	0.808591	426									-0.0434738	0.550402	0.925568	191	-0.0276368	0.616371	0.845252	331
ADSS_159	0.0468797	0.49822	0.999491	211	-0.0120486	0.804166	0.97523	426									-0.0243895	0.73109	0.96279	201	-0.0274074	0.612452	0.84333	344
ADTRP_84830	0.0596575	0.38858	0.999491	211	0.00665698	0.891034	0.987643	426	0.137704	0.0608881	0.44745	186	0.104556	0.074945	0.301183	291	-0.055511	0.433803	0.891713	201	-0.0694747	0.198643	0.544477	344
AEBP1_165	0.0381224	0.58186	0.999491	211	0.0440522	0.364409	0.871144	426									0.0915946	0.195942	0.785338	201	-0.0022682	0.966566	0.989273	344
AEBP2_121536	-0.00753697	0.913543	0.999491	210	0.0472481	0.334069	0.863849	420	-0.0802572	0.285534	0.713555	179	-0.104305	0.0803662	0.31295	282	0.108138	0.267559	0.830137	107	0.0296239	0.682565	0.876694	193
AEN_64782	-0.00189	0.978228	0.999491	211	0.00259173	0.957465	0.995244	426	-0.0150824	0.841178	0.962563	179	-0.0642041	0.280888	0.576114	284	0.204661	0.0344639	0.591055	107	0.190177	0.00807121	0.127513	193
AES_166	0.074616	0.280621	0.999491	211	0.072874	0.13318	0.74879	426									-0.0432921	0.541709	0.925568	201	-0.139608	0.00952444	0.136494	344
AFAP1L1_134265	0.0505844	0.46485	0.999491	211	0.00488829	0.91987	0.990242	426									-0.0424966	0.549168	0.925568	201	0.0166159	0.758783	0.908945	344
AFAP1L2_84632	-0.0789711	0.253416	0.999491	211	0.0293039	0.54639	0.924746	426
AFAP1_60312	-0.0293156	0.672007	0.999491	211	-0.00589535	0.903436	0.989264	426									0.0329294	0.736332	0.963682	107	0.0435817	0.547301	0.809979	193
AFDN_4301	-0.147031	0.0327875	0.98243	211	-0.0259348	0.593476	0.939141	426	-0.0260424	0.73005	0.928122	178	0.0226072	0.70543	0.873061	282	0.00705557	0.942501	0.990913	107	-0.076786	0.288516	0.628195	193
AFF1_4299	0.035415	0.609835	0.999491	210	0.0201546	0.680443	0.955362	420	-0.0839902	0.263646	0.697153	179	-0.0765273	0.198492	0.488183	284	0.0382665	0.589655	0.934764	201	-0.119946	0.0261075	0.215006	344
AFF2_2334	-0.0627447	0.365613	0.999491	210	-0.0980708	0.0445681	0.626783	420									0.0895047	0.359242	0.863415	107	0.0162716	0.822291	0.935328	193
AFF3_3899	-0.065036	0.348333	0.999491	210	-0.0711417	0.145539	0.760498	420	-0.0380092	0.614461	0.88414	178	0.0120858	0.839869	0.937138	282	0.117389	0.0969863	0.684344	201	0.139545	0.00955763	0.13652	344
AFF4_27125	-0.0440406	0.525619	0.999491	210	-0.0418075	0.392763	0.881149	420	-0.017471	0.81644	0.95345	179	-0.00158469	0.978788	0.993835	284	-0.123474	0.0807565	0.667526	201	-0.119819	0.0262677	0.21532	344
AFG1L_246269	-0.0268503	0.698182	0.999491	211	-0.0235429	0.627989	0.946765	426									-0.0285989	0.76997	0.968823	107	0.0482866	0.504867	0.783159	193
AFG3L1P_172																	-0.0841887	0.234736	0.811597	201	-0.0350916	0.516543	0.789948	344
AFG3L2_10939	0.0835611	0.226778	0.999491	211	0.121477	0.0121009	0.467159	426	-0.088904	0.236625	0.676616	179	-0.00965677	0.871286	0.949379	284	0.0147962	0.834858	0.977472	201	-0.0829988	0.124429	0.441931	344
AFMID_125061	0.0611381	0.376894	0.999491	211	0.0533544	0.271869	0.837611	426									-0.0469222	0.508322	0.918173	201	-0.039	0.47092	0.76382	344
AFM_173	-0.05267	0.446622	0.999491	211	0.0244157	0.615295	0.943662	426									0.0769764	0.277419	0.834817	201	0.0331688	0.539798	0.805781	344
AFP_174	-0.0613832	0.374981	0.999491	211	0.00636393	0.895803	0.988146	426	-0.0807694	0.282461	0.708372	179	-0.0592027	0.320138	0.611239	284	0.0692834	0.328415	0.857132	201	-0.011481	0.831973	0.93873	344
AFTPH_54812	0.00149325	0.982797	0.999491	211	0.0169325	0.727479	0.963663	426									0.0584364	0.549919	0.925568	107	0.0735782	0.309192	0.645546	193
AGAP11_119385									-0.101727	0.171792	0.614354	182	-0.157385	0.00766238	0.102529	286	0.077584	0.273633	0.833088	201	0.0508891	0.346691	0.675286	344
AGAP12P_414224									-0.0079816	0.914839	0.981313	182	-0.0148567	0.802461	0.919731	286	0.117442	0.0968338	0.684344	201	0.0892456	0.0984258	0.398339	344
AGAP1_116987	0.0909601	0.188123	0.999491	211	0.0663154	0.171871	0.780767	426	-0.0912101	0.220738	0.664921	182	-0.0455071	0.443306	0.707357	286	-0.069363	0.477751	0.906664	107	-0.0538088	0.45735	0.757284	193
AGAP2_116986	-0.0710712	0.304168	0.999491	211	-0.0391965	0.419701	0.887513	426	-0.0128158	0.865178	0.967849	178	0.0464888	0.436786	0.70485	282	-0.150186	0.0333321	0.587166	201	-0.0808671	0.134431	0.45813	344
AGAP3_116988	0.0382979	0.580121	0.999491	211	-0.0410494	0.398046	0.883577	426	-0.166791	0.0260675	0.337953	178	-0.255459	1.40478e-05	0.00509232	282	0.0448552	0.527201	0.923365	201	0.0888033	0.100112	0.401268	344
AGAP4_119016									-0.0486401	0.514365	0.847709	182	-0.00430873	0.942165	0.979503	286	0.113117	0.109854	0.700846	201	0.113242	0.0357787	0.247972	344
AGAP5_729092	-0.0364044	0.599001	0.999491	211	-0.066303	0.171951	0.780767	426	0.10402	0.162285	0.603929	182	0.151022	0.0105426	0.117426	286	-0.000548449	0.993835	0.999333	201	-0.0587273	0.27739	0.618287	344
AGAP6_414189	-0.0440823	0.52423	0.999491	211	-0.0499577	0.303607	0.847511	426	-0.077257	0.299911	0.726092	182	0.00681836	0.908599	0.965766	286	0.0943999	0.182538	0.782538	201	0.0826318	0.126108	0.444099	344
AGAP7P_653268									0.0379074	0.611413	0.884135	182	0.0580123	0.32827	0.618029	286	-0.106345	0.132954	0.729177	201	-0.0447417	0.408108	0.721871	344
AGAP9_642517	0.0120364	0.862017	0.999491	211	-0.019343	0.690558	0.957552	426	-0.0241949	0.747843	0.93261	179	-0.0788804	0.186567	0.475511	282	-0.0965051	0.172931	0.770806	201	-0.0317244	0.557603	0.816735	344
AGA_175	0.0348616	0.614586	0.999491	211	0.0230301	0.635499	0.947884	426									0.0512712	0.46978	0.903212	201	0.0385893	0.475607	0.76679	344
AGBL1_123624	-0.0630943	0.361789	0.999491	211	0.0132023	0.785849	0.972336	426
AGBL2_79841	0.167835	0.014655	0.98243	211	0.0827848	0.0879022	0.69611	426									-0.0206136	0.771467	0.969228	201	-0.0325103	0.54788	0.810142	344
AGBL3_340351	-0.0235268	0.734034	0.999491	211	-0.0253241	0.602206	0.93952	426									0.0615859	0.385115	0.876242	201	-0.013051	0.809409	0.929141	344
AGBL4_84871	0.113958	0.0987618	0.999491	211	0.0266509	0.583314	0.937728	426									0.101646	0.151055	0.744391	201	0.141972	0.00836491	0.130013	344
AGBL5_60509	0.11172	0.105608	0.999491	211	0.0297433	0.540388	0.9244	426									0.0718616	0.310692	0.849731	201	0.063421	0.240722	0.583109	344
AGER_177	-0.00513016	0.940949	0.999491	211	-0.0149964	0.757602	0.966322	426									0.0844558	0.233249	0.809535	201	0.0265241	0.623961	0.849281	344
AGFG1_3267	0.0554878	0.422647	0.999491	211	0.0364743	0.452738	0.900388	426	0.015814	0.833583	0.96053	179	-0.00372118	0.950394	0.982442	282	0.0936574	0.186018	0.782928	201	0.0962279	0.0746835	0.349025	344
AGFG2_3268	0.0195217	0.778011	0.999491	211	0.00959015	0.843545	0.980839	426	-0.127169	0.0898138	0.500084	179	-0.0975528	0.102088	0.353778	282	0.021565	0.825501	0.976427	107	-0.054282	0.453397	0.755376	193
AGGF1_55109	-0.029355	0.671592	0.999491	211	-0.039651	0.414327	0.886001	426									-0.00461475	0.962374	0.993385	107	-0.0890911	0.21791	0.561583	193
AGK_55750	-0.00800925	0.907929	0.999491	211	-0.028905	0.551868	0.926491	426									0.0132129	0.892552	0.984775	107	0.0198005	0.784609	0.919332	193
AGL_178	-0.0311518	0.652763	0.999491	211	-0.0268025	0.581174	0.937115	426
AGMAT_79814	0.0520102	0.452344	0.999491	211	0.0742682	0.125896	0.743064	426									-0.0511351	0.470961	0.9042	201	-0.0394296	0.466043	0.76161	344
AGMO_392636	0.0172901	0.802835	0.999491	211	0.0455182	0.348651	0.868464	426									0.0901413	0.35582	0.86265	107	0.0746246	0.302343	0.640759	193
AGO1_26523	-0.0857717	0.214682	0.999491	211	-0.0367835	0.448913	0.898982	426	-0.00220944	0.976583	0.994795	179	0.0179795	0.762893	0.900954	284	-6.27272e-05	0.999295	0.999827	201	0.0859216	0.111666	0.420582	344
AGO2_27161	0.0982065	0.155172	0.999491	211	0.0708035	0.144591	0.760057	426									0.108107	0.126612	0.720824	201	0.152998	0.0044533	0.0968537	344
AGO3_192669	0.000541228	0.993765	0.999963	211	0.0496769	0.306337	0.847545	426	-0.0683835	0.364415	0.765382	178	-0.042093	0.481411	0.735722	282	-0.00814811	0.908603	0.988144	201	-0.0016895	0.975093	0.991436	344
AGO4_192670	0.0436073	0.528715	0.999491	211	0.0357457	0.461822	0.904867	426									-0.0379413	0.592824	0.93536	201	-0.0100684	0.852393	0.947575	344
AGPAT1_10554	-0.136157	0.0482393	0.98243	211	-0.0655996	0.176555	0.783036	426									-0.0291974	0.680742	0.953282	201	-0.0642858	0.234355	0.576765	344
AGPAT2_10555	0.103352	0.134557	0.999491	211	0.0608169	0.210308	0.802317	426	0.105015	0.162995	0.604881	178	-0.0182188	0.760662	0.900442	282	-0.0502172	0.478971	0.907175	201	-0.00146809	0.978356	0.992361	344
AGPAT3_56894	0.153517	0.0257502	0.98243	211	0.0639206	0.187914	0.790104	426									0.0310664	0.661531	0.949614	201	-0.0420585	0.43682	0.744246	344
AGPAT4_56895	-0.0193401	0.780023	0.999491	211	0.0341859	0.481607	0.911418	426									-0.0741672	0.295383	0.843265	201	0.0326963	0.545591	0.809043	344
AGPAT5_55326	-0.120379	0.0810606	0.991144	211	0.0449702	0.35449	0.868967	426	-0.0109042	0.884813	0.973698	179	-0.0297532	0.617561	0.820295	284	-0.0243047	0.73199	0.962978	201	-0.0546601	0.312084	0.648031	344
AGPS_8540	0.0807698	0.24273	0.999491	211	0.0222848	0.64648	0.950379	426									-0.0140331	0.843262	0.978031	201	-0.0225537	0.676797	0.873967	344
AGR2_10551	0.0850072	0.218812	0.999491	211	0.0959749	0.0477427	0.631987	426	-0.0044184	0.953191	0.989285	179	-0.0607075	0.309695	0.60206	282	-0.0445349	0.648758	0.947035	107	-0.145607	0.0433333	0.269007	193
AGR3_155465	-0.0294923	0.670145	0.999491	211	0.0874483	0.071378	0.674457	426									-0.0363305	0.710254	0.957192	107	0.0971658	0.178856	0.518287	193
AGRN_375790	0.113838	0.0991198	0.999491	211	0.0839445	0.0835304	0.68743	426									-0.0955487	0.177248	0.778101	201	-0.0790383	0.143496	0.471963	344
AGRP_181	0.0144443	0.834777	0.999491	211	0.0275381	0.570838	0.933453	426	-0.139311	0.0629035	0.448915	179	-0.0396445	0.505785	0.752965	284	0.0635745	0.515334	0.918947	107	-0.0391403	0.588901	0.832621	193
AGTPBP1_23287	-0.0352319	0.610829	0.999491	211	0.0421947	0.385002	0.878185	426									0.235809	0.000751777	0.272242	201	0.163272	0.00238451	0.0751513	344
AGTR1_185	-0.0759516	0.272076	0.999491	211	0.0393512	0.417867	0.886416	426	-0.0381977	0.60472	0.88232	186	-0.0327133	0.578352	0.798261	291	-0.00987133	0.889386	0.984775	201	0.0237924	0.660126	0.867142	344
AGTR2_186	0.00143126	0.983511	0.999491	211	-0.0296649	0.541456	0.9244	426	-0.0607269	0.419364	0.799991	179	-0.00579286	0.922848	0.969963	282	0.0393366	0.579286	0.933029	201	-0.0821406	0.128384	0.448163	344
AGTRAP_57085	-0.0875904	0.205083	0.999491	211	-0.0540834	0.265363	0.834022	426									-0.112869	0.110643	0.700846	201	-0.0554805	0.304866	0.642843	344
AGT_183	-0.0480268	0.487753	0.999491	211	-0.039586	0.415092	0.886001	426	-0.102701	0.171298	0.614354	179	-0.114056	0.05574	0.257249	282	-0.0490551	0.489216	0.912857	201	-0.0045439	0.93308	0.976255	344
AGXT2_64902	0.15979	0.0205226	0.98243	210	0.0710318	0.146164	0.7608	420	-0.0844701	0.262272	0.696975	178	-0.0280327	0.639249	0.833115	282	-0.054293	0.443973	0.893902	201	-0.0605226	0.262941	0.60537	344
AGXT_189	-0.11616	0.0931588	0.999491	210	-0.0349812	0.474619	0.909147	420	-0.250491	0.000719768	0.115866	179	-0.212278	0.000330779	0.0201672	282	0.0647553	0.361086	0.863578	201	0.0145775	0.78762	0.920264	344
AHCTF1P1_285116									-0.0700931	0.351151	0.757282	179	-0.10192	0.0864401	0.325477	284	0.0829868	0.241508	0.814497	201	-0.00213242	0.968566	0.989872	344
AHCTF1_25909	-0.0327013	0.636699	0.999491	211	-0.151833	0.00167319	0.280151	426	0.121442	0.105363	0.52918	179	0.0634992	0.286214	0.581599	284	0.0371501	0.600564	0.93741	201	0.0536833	0.320822	0.654543	344
AHCYL1_10768	-0.0944529	0.171652	0.999491	211	-0.0569561	0.240772	0.822159	426	-0.127261	0.0895797	0.500084	179	-0.0860671	0.149424	0.424955	282	-0.0150901	0.831626	0.97699	201	-0.0313807	0.561881	0.819134	344
AHCYL2_23382	-0.0705926	0.307444	0.999491	211	-0.0129052	0.790556	0.973236	426	-0.0490534	0.514347	0.847709	179	0.0696105	0.243946	0.537273	282	0.0734233	0.300267	0.845264	201	0.164139	0.00225828	0.0730455	344
AHCY_191	-0.0217746	0.753177	0.999491	211	-0.0851073	0.0793248	0.682598	426	0.0598187	0.427679	0.803589	178	0.0167651	0.779245	0.907223	282	-0.0265364	0.708451	0.957192	201	-0.0610876	0.258502	0.600805	344
AHDC1_27245	0.120786	0.0800309	0.991144	211	0.0226555	0.641008	0.948768	426
AHI1_54806	0.0910713	0.187581	0.999491	211	-0.00421309	0.930908	0.990788	426	-0.10264	0.171555	0.614354	179	-0.0282536	0.635405	0.831788	284	-0.195637	0.0434375	0.607325	107	-0.200297	0.0052239	0.104572	193
AHNAK2_113146	-0.0168352	0.807921	0.999491	211	-0.0473559	0.329516	0.860685	426
AHNAK_79026	-0.0290365	0.674951	0.999491	211	0.00480164	0.921286	0.990242	426									-0.0651901	0.504695	0.917827	107	-0.109913	0.128095	0.447515	193
AHRR_57491	-0.0640018	0.35491	0.999491	211	-0.00459087	0.924731	0.990242	426	0.102467	0.172281	0.614354	179	0.118903	0.0452779	0.231761	284	0.0164343	0.816881	0.975662	201	-0.0291094	0.590543	0.833858	344
AHR_196	0.0625617	0.365863	0.999491	211	0.0543442	0.263062	0.831981	426	-0.0811626	0.280117	0.707118	179	0.0365433	0.53966	0.773506	284	-0.0442562	0.532738	0.924784	201	-0.0499108	0.356052	0.682803	344
AHSA1_10598	0.0263896	0.703114	0.999491	211	-0.023244	0.632362	0.947857	426									0.0990839	0.309918	0.849731	107	0.0440495	0.543005	0.807265	193
AHSA2_130872																	0.0580399	0.552634	0.925753	107	0.0414679	0.566919	0.821832	193
AHSG_197	0.0491662	0.477476	0.999491	211	0.0146437	0.763131	0.967411	426									-0.0793503	0.262827	0.828491	201	-0.0812104	0.13278	0.455149	344
AHSP_51327	-0.0353002	0.610137	0.999491	211	-0.0303306	0.532417	0.923065	426									-0.119901	0.218644	0.798819	107	-0.0738034	0.307709	0.644595	193
AICDA_57379	0.00792644	0.909094	0.999491	210	0.0458982	0.348078	0.868349	420	-0.000410893	0.995644	0.999027	179	0.0237647	0.690055	0.864737	284	0.0787988	0.450288	0.896824	94	-0.0300412	0.71424	0.890077	151
AIDA_64853	-0.0114232	0.868982	0.999491	211	0.0102241	0.833348	0.978962	426									0.144505	0.137538	0.734268	107	0.18808	0.00881017	0.132503	193
AIF1L_83543	0.00185078	0.978679	0.999491	211	-0.0103052	0.832046	0.978803	426									-0.0391404	0.58118	0.933029	201	-0.0682474	0.20671	0.551851	344
AIF1_199	-0.023782	0.73126	0.999491	211	0.0209063	0.666991	0.953758	426									0.0941993	0.183474	0.782538	201	0.0906058	0.0933817	0.389487	344
AIFM1_9131	-0.0977582	0.158074	0.999491	210	0.00466683	0.924031	0.990242	420	-0.141051	0.0596543	0.442552	179	-0.0613925	0.304258	0.59918	282	0.0223918	0.752368	0.966272	201	0.0420129	0.437318	0.744446	344
AIFM2_84883	-0.106563	0.122803	0.999491	211	-0.0919563	0.0579073	0.650721	426	0.0447876	0.544945	0.85976	185	-0.0361482	0.540501	0.773559	289	-0.301855	1.3315e-05	0.0541047	201	-0.164376	0.00222487	0.0728513	344
AIFM3_150209	0.0145495	0.83359	0.999491	211	-0.00478268	0.921596	0.990242	426	-0.0296566	0.693518	0.910303	179	-0.0401333	0.502074	0.750126	282	-0.149875	0.0337036	0.588233	201	-0.0864802	0.109348	0.416392	344
AIG1_51390	-8.21016e-05	0.999054	0.999972	211	-0.0681598	0.160229	0.772717	426	0.0305876	0.68525	0.907095	178	-0.0144906	0.808571	0.923039	282
AIM2_9447	0.00769574	0.911518	0.999491	211	-0.0440975	0.363915	0.871144	426									-0.0575458	0.417114	0.887549	201	-0.0864955	0.109285	0.416246	344
AIMP1_9255	-0.0323836	0.63998	0.999491	211	0.00389123	0.936175	0.991482	426									-0.00452521	0.963103	0.993462	107	0.0368529	0.610876	0.842885	193
AIMP2_7965	-0.000357414	0.995882	0.999963	211	0.0986546	0.0418316	0.61987	426									-0.0210081	0.767218	0.968617	201	0.0498602	0.35654	0.683271	344
AIPL1_23746	0.130775	0.0578951	0.983399	211	0.0930809	0.0548966	0.648988	426	0.115673	0.123088	0.552098	179	0.127415	0.0324457	0.19573	282	-0.0123055	0.862353	0.980459	201	-0.0653588	0.226622	0.569616	344
AIP_9049	0.0838207	0.226449	0.999491	210	0.0195842	0.68901	0.957375	420	-0.190149	0.0110135	0.25986	178	-0.0651624	0.275466	0.57174	282	0.0661108	0.3511	0.861546	201	-0.0228303	0.673059	0.872928	344
AIRE_326	-0.0615464	0.374858	0.999491	210	-0.0633945	0.194757	0.795213	420	-0.154079	0.0394645	0.389332	179	-0.081152	0.172625	0.459972	284	-0.119683	0.0905872	0.67819	201	-0.105086	0.0514925	0.29246	344
AJAP1_55966	0.026681	0.699993	0.999491	211	-0.0192134	0.692525	0.957706	426	-0.147287	0.0491254	0.415897	179	-0.0830282	0.16438	0.447875	282	-0.0422878	0.551135	0.925568	201	-0.109439	0.0425094	0.267373	344
AJM1_389813	0.0315008	0.649131	0.999491	211	-0.0323095	0.506002	0.919613	426
AJUBA_84962	-0.0436487	0.529314	0.999491	210	0.0154892	0.751618	0.965526	420									0.0716139	0.312367	0.850852	201	-0.0244111	0.651861	0.862848	344
AK1_203	0.174446	0.0111357	0.98243	211	0.0504362	0.298993	0.847511	426	0.0188776	0.801955	0.949887	179	0.0542822	0.363786	0.647273	282	0.122443	0.0833407	0.671206	201	0.0667018	0.217201	0.561324	344
AK2_204	-0.0687359	0.320373	0.999491	211	-0.105644	0.0292449	0.572992	426									0.0396922	0.575858	0.93261	201	-0.0153206	0.777071	0.915435	344
AK3_50808	-0.0212291	0.759168	0.999491	211	-0.00601315	0.901516	0.989035	426									0.0330823	0.641054	0.946404	201	-0.0329686	0.542249	0.807016	344
AK4_205	0.0067142	0.922765	0.999491	211	0.0358499	0.460516	0.904216	426	-0.102728	0.172404	0.614354	178	-0.0494544	0.408068	0.684261	282	0.0718332	0.310883	0.849731	201	-0.0196646	0.716282	0.890899	344
AK5_26289	-0.0542765	0.43286	0.999491	211	-0.0297037	0.540928	0.9244	426	0.0673928	0.36205	0.764382	185	-0.0454985	0.440991	0.706197	289	0.0110372	0.87642	0.98291	201	-0.00192967	0.971554	0.990687	344
AK6_102157402	-0.0540949	0.434404	0.999491	211	0.00872699	0.857469	0.984318	426
AK7_122481	0.00298125	0.965663	0.999491	211	0.0159121	0.743307	0.965043	426									0.0324646	0.647301	0.946989	201	0.082836	0.125171	0.442863	344
AK8_158067	0.100251	0.146712	0.999491	211	0.00536506	0.912085	0.990242	426									0.0949004	0.180219	0.780392	201	0.0167566	0.756805	0.908605	344
AK9_221264	0.0297386	0.667554	0.999491	211	0.0304912	0.530247	0.922916	426									-0.123738	0.204152	0.790844	107	0.0117519	0.871142	0.954422	193
AKAIN1_642597	0.00956912	0.890101	0.999491	211	0.0323255	0.505792	0.919613	426
AKAP10_11216	-0.073604	0.287214	0.999491	211	-0.0149728	0.757972	0.966322	426	0.0734258	0.328665	0.746467	179	-0.09021	0.129359	0.398315	284	-0.133156	0.0595057	0.635448	201	-0.164731	0.00217558	0.0725924	344
AKAP11_11215	0.000764123	0.991197	0.999963	211	0.010602	0.827285	0.978505	426									-0.139822	0.0477386	0.608721	201	-0.207522	0.000105648	0.0163351	344
AKAP12_9590	0.0678309	0.326801	0.999491	211	0.0593262	0.221724	0.81029	426									-0.128945	0.0681027	0.65641	201	-0.0579168	0.284086	0.625392	344
AKAP13_11214	-0.0937294	0.174973	0.999491	211	0.0382745	0.43073	0.891396	426	0.112261	0.13461	0.569777	179	0.148864	0.0120168	0.121926	284	-0.101813	0.15038	0.743044	201	-0.0765834	0.156388	0.490648	344
AKAP14_158798	-0.0823585	0.233558	0.999491	211	0.0130116	0.78887	0.972919	426									0.0555929	0.433125	0.891713	201	0.0196043	0.717115	0.891235	344
AKAP17A_8227	-0.0202796	0.769631	0.999491	211	0.00816576	0.866546	0.984977	426									0.101591	0.151277	0.744634	201	-0.0832089	0.123475	0.440279	344
AKAP1_8165	-0.0448039	0.518461	0.999491	210	0.0648508	0.18468	0.786404	420	-0.0754165	0.315685	0.738513	179	-0.113531	0.0560045	0.257841	284	-0.0302892	0.669493	0.951914	201	-0.136691	0.011151	0.144926	344
AKAP2_11217	0.0496641	0.473022	0.999491	211	0.0472098	0.331012	0.861471	426									0.0985494	0.312548	0.850852	107	-0.000727618	0.991987	0.997051	193
AKAP3_10566	-0.00769999	0.911469	0.999491	211	-0.0135523	0.780316	0.970723	426									0.148704	0.0351329	0.594357	201	0.0241105	0.655872	0.86516	344
AKAP4_8852	-0.101258	0.142679	0.999491	211	-0.0561744	0.2473	0.823083	426									0.091823	0.194825	0.784959	201	-0.0364463	0.500476	0.780553	344
AKAP5_9495	-0.0482793	0.485466	0.999491	211	0.0378738	0.435573	0.893345	426									0.000587372	0.993397	0.999258	201	0.0318739	0.555746	0.815202	344
AKAP6_9472	-0.00820225	0.90572	0.999491	211	0.000628967	0.989673	0.999923	426									-0.0215213	0.7617	0.967988	201	0.0407189	0.451579	0.754383	344
AKAP7_9465	-4.08203e-05	0.99953	0.999972	211	-0.0455282	0.348545	0.868464	426									-0.00784398	0.912	0.988591	201	0.0750099	0.165101	0.501407	344
AKAP8L_26993	0.0218185	0.752696	0.999491	211	0.0387398	0.425143	0.890026	426									-0.0388532	0.58396	0.933029	201	-0.0160564	0.766667	0.911516	344
AKAP8_10270	0.0900997	0.192352	0.999491	211	0.0309246	0.524416	0.922355	426	-0.0318683	0.671939	0.903204	179	-0.112004	0.0594121	0.266264	284	0.127494	0.0712891	0.661018	201	0.0167179	0.757349	0.908605	344
AKAP9_10142	0.0333289	0.630241	0.999491	211	0.0142127	0.769904	0.969591	426	0.0507483	0.501119	0.841175	178	-0.016806	0.77872	0.907009	282	0.0248201	0.72653	0.960902	201	0.137549	0.0106487	0.142805	344
AKIP1_56672	-0.149737	0.0296744	0.98243	211	-0.0763338	0.115677	0.730259	426									-0.0527588	0.456974	0.898507	201	-0.00660629	0.902833	0.965407	344
AKIRIN1_79647	-0.0175988	0.799388	0.999491	211	-0.066624	0.16988	0.77978	426									0.000140633	0.998853	0.999827	107	-0.151754	0.0351382	0.245615	193
AKIRIN2_55122	0.144635	0.0362182	0.98243	210	-0.0177053	0.717504	0.962684	420
AKNAD1_254268	-0.0866109	0.210214	0.999491	211	-0.0457081	0.346642	0.868349	426
AKNA_80709	-0.0415053	0.548789	0.999491	211	0.0642411	0.185705	0.787004	426	-0.217394	0.00346456	0.170731	179	-0.135344	0.0225309	0.162316	284	-0.0750711	0.289521	0.84103	201	-0.0730953	0.176186	0.515015	344
AKR1A1_10327	0.112015	0.104685	0.999491	211	0.054255	0.263847	0.832721	426	-0.174027	0.0201682	0.313283	178	-0.154207	0.00949738	0.111058	282	-0.00869974	0.902445	0.986228	201	0.063837	0.237644	0.579201	344
AKR1B10_57016	-0.0703881	0.308852	0.999491	211	-0.0459224	0.344382	0.868349	426	0.0688635	0.355634	0.761187	182	0.133509	0.0239407	0.167922	286	0.00387207	0.956494	0.993066	201	-0.0355823	0.510692	0.786763	344
AKR1B15_441282	-0.139065	0.0436071	0.98243	211	-0.0176985	0.715672	0.962539	426	-0.0115342	0.877185	0.972286	182	-0.0381	0.521042	0.761893	286
AKR1B1_231	0.0284841	0.680793	0.999491	211	-0.0188666	0.6978	0.959019	426	-0.0185663	0.805155	0.95022	179	0.0873414	0.143469	0.418342	282	0.136479	0.053372	0.626663	201	0.135198	0.0120743	0.150078	344
AKR1C1_1645	0.0267603	0.699144	0.999491	211	0.076999	0.112529	0.726625	426	-0.062374	0.40288	0.789355	182	0.0124744	0.833632	0.934746	286	0.0532086	0.453141	0.897681	201	-0.0162632	0.76375	0.910657	344
AKR1C2_1646	0.1572	0.0223648	0.98243	211	0.00310182	0.949103	0.993829	426	0.0250945	0.736672	0.928407	182	-0.15343	0.00935557	0.110231	286	0.0353463	0.618378	0.941593	201	-0.0915695	0.0899346	0.38245	344
AKR1C3_8644	-0.02084	0.763451	0.999491	211	-0.0272722	0.574564	0.93474	426	0.101585	0.176024	0.617007	179	0.111623	0.0612061	0.270898	282	-0.00126331	0.985799	0.998091	201	0.0896561	0.0968813	0.395721	344
AKR1C4_1109	0.0726612	0.293449	0.999491	211	0.0692113	0.153863	0.76808	426	0.0223863	0.764204	0.938036	182	-0.115862	0.050298	0.243756	286	-0.00635136	0.928696	0.990322	201	0.037881	0.483751	0.771216	344
AKR1C6P_389932																	-0.07347	0.299959	0.845033	201	-0.0564087	0.296834	0.635828	344
AKR1C8P_340811																	-0.0673993	0.341771	0.858514	201	-0.0197436	0.715191	0.890355	344
AKR1D1_6718	0.13052	0.0583896	0.983399	211	-0.00278128	0.954357	0.994806	426	-0.0371339	0.621654	0.884917	179	-0.0239642	0.688643	0.863918	282	0.00342624	0.961499	0.993331	201	0.0749701	0.165326	0.501695	344
AKR1E2_83592	0.108759	0.11523	0.999491	211	0.0504254	0.299097	0.847511	426	0.0827647	0.272062	0.700459	178	0.0582815	0.329464	0.619004	282	0.09068	0.200463	0.786624	201	0.00729851	0.89271	0.961797	344
AKR7A2P1_246182									0.0254569	0.735168	0.928165	179	-0.0698487	0.242332	0.535643	282
AKR7A2_8574	-0.0800555	0.246935	0.999491	211	-0.0921584	0.0573562	0.649531	426	-0.0465271	0.53627	0.856577	179	0.0420987	0.481352	0.735722	282	0.00938474	0.894806	0.984775	201	-0.105002	0.0516807	0.293267	344
AKR7A3_22977	0.0858356	0.21434	0.999491	211	0.0615085	0.205159	0.801143	426	-0.126702	0.0910094	0.503329	179	-0.0853901	0.152663	0.429752	282	0.0569615	0.421868	0.888884	201	0.0124122	0.818571	0.934272	344
AKR7L_246181									0.110299	0.141601	0.577228	179	0.01269	0.831979	0.933854	282	-0.0884335	0.211888	0.796963	201	-0.101615	0.0597428	0.31517	344
AKT1S1_84335	0.0346161	0.617082	0.999491	211	-0.00749052	0.877491	0.98639	426	-0.0545419	0.469624	0.825899	178	0.0104042	0.861908	0.946141	282	-0.0141703	0.884818	0.984124	107	0.104124	0.149567	0.481276	193
AKT1_207	0.0489817	0.479133	0.999491	211	-0.0156788	0.746941	0.965043	426	-0.054748	0.466679	0.825183	179	-0.118737	0.0455816	0.232129	284	0.134551	0.0568637	0.631906	201	0.00642811	0.905441	0.966335	344
AKT2_208	-0.0858452	0.214288	0.999491	211	-0.0882868	0.068695	0.672439	426	-0.0257594	0.732141	0.928122	179	-0.110231	0.0635814	0.276548	284	-0.0180569	0.799168	0.972465	201	-0.0477538	0.377247	0.699974	344
AKT3_10000	-0.0487768	0.480975	0.999491	211	-0.0112887	0.81629	0.977154	426	0.0116878	0.876599	0.972286	179	-0.0374741	0.529375	0.767153	284	0.0167756	0.813147	0.975029	201	0.0540793	0.31726	0.651852	344
AKTIP_64400	0.151833	0.0274404	0.98243	211	0.0824603	0.0891578	0.699095	426	0.116281	0.121117	0.550687	179	0.215594	0.000264959	0.0182159	282	0.160349	0.0229727	0.542122	201	0.0749517	0.16543	0.50177	344
ALAD_210	-0.0642107	0.353339	0.999491	211	-0.0509176	0.294399	0.847156	426									-0.0389533	0.58299	0.933029	201	0.0512288	0.343478	0.672939	344
ALAS1_211	-0.0182519	0.79211	0.999491	211	-0.0606043	0.21191	0.803385	426	-0.0779246	0.299814	0.72609	179	-0.0363293	0.543477	0.775909	282	0.061481	0.385926	0.876416	201	0.124693	0.020705	0.192837	344
ALAS2_212	0.0378706	0.584358	0.999491	211	-0.0381506	0.432224	0.891931	426	-0.0937922	0.213031	0.655621	178	-0.0025649	0.965797	0.988305	282	0.0555519	0.433464	0.891713	201	-0.0146941	0.785963	0.919654	344
ALB_213	-0.137734	0.0456784	0.98243	211	-0.0153967	0.751343	0.965526	426	-0.169687	0.0235493	0.328332	178	-0.168116	0.00464333	0.0794648	282	-0.0443784	0.531606	0.924261	201	-0.0677596	0.20998	0.55541	344
ALCAM_214	0.10142	0.142036	0.999491	211	0.0836241	0.0847203	0.687826	426	-0.17595	0.0188093	0.306551	178	-0.0345354	0.563572	0.790587	282	-0.0457819	0.639602	0.945605	107	-0.13746	0.0566099	0.306877	193
ALDH16A1_126133	-0.149438	0.0300053	0.98243	211	-0.0537629	0.26821	0.836342	426	-0.00591004	0.937593	0.983258	178	0.016458	0.783187	0.909527	282	-0.226004	0.00125522	0.284907	201	-0.145623	0.00682015	0.119597	344
ALDH18A1_5832	0.0213049	0.758335	0.999491	211	0.0746768	0.123821	0.739743	426	0.139622	0.0630573	0.449403	178	0.0669022	0.262823	0.559086	282	-0.0442738	0.532574	0.924784	201	0.00951077	0.860482	0.950638	344
ALDH1A1_216	-0.00243488	0.971953	0.999491	211	0.0502718	0.300574	0.847511	426	-0.0301658	0.683559	0.906974	185	-0.137422	0.0194312	0.152657	289	-0.032862	0.643279	0.946989	201	0.0379931	0.482458	0.769971	344
ALDH1A2_8854	0.0025747	0.970343	0.999491	211	0.0249452	0.60765	0.941539	426	-0.0222713	0.767933	0.939995	178	-0.0124052	0.835696	0.935262	282	0.0372485	0.599599	0.937095	201	0.0593445	0.272362	0.613939	344
ALDH1A3_220	-0.0182659	0.791954	0.999491	211	0.0797739	0.100115	0.706927	426	-0.0721482	0.338545	0.753642	178	-0.0653101	0.274377	0.57174	282	-0.228407	0.00110919	0.279479	201	-0.139568	0.00954552	0.136494	344
ALDH1B1_219	-0.0348201	0.615856	0.999491	210	0.069825	0.153158	0.767016	420	-0.0072612	0.921644	0.981323	186	-0.00181475	0.97541	0.992768	291	-0.125815	0.176482	0.776715	117	-0.127843	0.0670631	0.330101	206
ALDH1L1_10840	0.0432126	0.532456	0.999491	211	-0.0199651	0.681142	0.955608	426	0.0872707	0.246723	0.687178	178	0.0693952	0.245411	0.538392	282	0.0367292	0.6047	0.938907	201	0.0010598	0.984375	0.994488	344
ALDH1L2_160428	0.0818817	0.236285	0.999491	211	0.00384908	0.936865	0.991867	426	-0.0737284	0.32667	0.746467	179	-0.0801607	0.179496	0.468603	282	0.10269	0.292549	0.842247	107	-0.0513915	0.477838	0.76815	193
ALDH2_217	0.109788	0.112674	0.999491	210	0.0766828	0.116611	0.730259	420	-0.201902	0.00687957	0.218901	178	-0.212922	0.000316905	0.0199001	282	-0.0596081	0.40059	0.882712	201	-0.107338	0.0466644	0.280137	344
ALDH3A1_218	-0.0603627	0.382987	0.999491	211	-0.0085088	0.860996	0.984977	426	-0.225952	0.00192869	0.14242	186	-0.22333	0.000122058	0.0124796	291	0.0491764	0.488142	0.912102	201	0.0949327	0.0786958	0.358279	344
ALDH3A2_224	0.005466	0.937241	0.999491	210	0.00831283	0.865122	0.984977	420	-0.0163804	0.824857	0.956847	185	0.00568342	0.923362	0.969984	289	0.14293	0.0429553	0.606457	201	0.0143661	0.790628	0.921655	344
ALDH3B1_221									-0.129957	0.077882	0.476538	185	0.00894097	0.879707	0.952653	289	-0.0354539	0.617309	0.941326	201	0.0537831	0.319922	0.653695	344
ALDH3B2_222	0.0268366	0.698328	0.999491	211	-0.00335998	0.944874	0.993307	426	0.0919952	0.221967	0.666042	178	0.161727	0.00649411	0.0937465	282	-0.000279642	0.996856	0.999723	201	0.0905082	0.0937366	0.390007	344
ALDH4A1_8659	0.163372	0.0175493	0.98243	211	0.110418	0.02265	0.537726	426	-0.0982384	0.182207	0.62258	186	-0.148302	0.0113097	0.120378	291	-0.0421565	0.552373	0.925594	201	0.0241601	0.655209	0.865003	344
ALDH5A1_7915	0.0896117	0.194782	0.999491	211	0.0977464	0.0437618	0.622875	426	0.0732288	0.320559	0.742759	186	-0.00389154	0.947299	0.981386	291	-0.121095	0.0868189	0.678159	201	-0.0475926	0.378861	0.701362	344
ALDH6A1_4329	0.0721371	0.296954	0.999491	211	0.0566042	0.243695	0.822159	426	-0.212587	0.00438671	0.183787	178	-0.0990381	0.0969491	0.344519	282	0.087512	0.216708	0.798417	201	0.0236555	0.661961	0.867716	344
ALDH7A1_501	0.0616195	0.37429	0.999491	210	0.0330472	0.499401	0.916808	420	-0.00602544	0.934947	0.983171	186	0.0488245	0.406655	0.683184	291	0.106664	0.131787	0.728423	201	0.133221	0.0134014	0.157764	344
ALDH8A1_64577	0.113775	0.0993094	0.999491	211	0.00352693	0.942139	0.99294	426	-0.118804	0.113201	0.540346	179	-0.137071	0.0213087	0.158081	282	0.0425906	0.548284	0.925568	201	-0.108086	0.0451478	0.275073	344
ALDH9A1_223	0.0832724	0.229512	0.999491	210	0.0524883	0.28317	0.843478	420	0.0339459	0.651908	0.895674	179	-0.0360042	0.547092	0.777713	282	0.0588275	0.406798	0.88392	201	-0.0367567	0.496832	0.778347	344
ALDOA_226	-0.116007	0.0928069	0.999491	211	-0.0697211	0.150847	0.764485	426	-0.0465974	0.535653	0.856216	179	-0.00594803	0.920788	0.969218	282	-0.00921671	0.896679	0.985228	201	0.0125392	0.816748	0.93283	344
ALDOB_229	-0.0753333	0.27601	0.999491	211	-0.0262102	0.589559	0.939141	426	-0.133127	0.0764752	0.470594	178	-0.180212	0.0023836	0.056112	282	-0.113752	0.107861	0.700387	201	-0.142951	0.0079228	0.126546	344
ALDOC_230	-0.03044	0.660196	0.999491	211	0.0904028	0.0622896	0.66102	426	-0.03234	0.668257	0.901141	178	0.00111588	0.985116	0.995079	282	-0.0943167	0.182926	0.782538	201	-0.0578814	0.284381	0.625793	344
ALG10B_144245	0.0596581	0.388575	0.999491	211	0.0361241	0.457091	0.902477	426	-0.13014	0.0825027	0.486477	179	-0.0866152	0.14684	0.422305	282	-0.103351	0.144283	0.738396	201	-0.11099	0.0396447	0.258361	344
ALG10_84920	-0.0162832	0.814101	0.999491	211	-0.00204973	0.966354	0.996845	426	-0.0215942	0.774173	0.941594	179	0.0123504	0.836412	0.9358	282	0.191002	0.00660584	0.424064	201	0.202732	0.000153204	0.0201696	344
ALG11_440138	0.0402663	0.560794	0.999491	211	-0.0340823	0.482937	0.911418	426									0.164541	0.0903423	0.67819	107	0.199613	0.00538305	0.106186	193
ALG12_79087	-0.00679839	0.9218	0.999491	211	0.0256961	0.596881	0.939141	426									0.116674	0.0990525	0.688699	201	0.0329517	0.542456	0.807086	344
ALG13_79868	-0.00476538	0.945272	0.999491	210	0.0450802	0.356745	0.868967	420									-0.0379454	0.592784	0.93536	201	-0.00679598	0.900057	0.964655	344
ALG14_199857	-0.036223	0.600824	0.999491	211	0.00625529	0.897572	0.988524	426
ALG1L2_644974																	0.0851859	0.229219	0.806747	201	0.0325952	0.546834	0.809668	344
ALG1L_200810	0.00298777	0.965588	0.999491	211	0.0327985	0.499584	0.916839	426									0.0534558	0.451042	0.897211	201	0.0403769	0.455391	0.757002	344
ALG1_56052	0.000338297	0.996102	0.999963	211	0.00229464	0.962336	0.996262	426									-0.204575	0.00357827	0.387484	201	-0.157041	0.00349787	0.0864407	344
ALG2_85365	-0.0719857	0.297972	0.999491	211	0.0110322	0.820393	0.977494	426									0.00224382	0.974781	0.99606	201	-0.0439014	0.416977	0.728589	344
ALG3_10195	0.119032	0.084544	0.996557	211	0.0761186	0.116711	0.730259	426	0.00842792	0.910847	0.98117	179	-0.0361599	0.545359	0.777205	282	-0.0394569	0.578125	0.933029	201	-0.0139685	0.796294	0.924147	344
ALG5_29880	0.00654286	0.92473	0.999491	211	0.017319	0.721514	0.962684	426	0.250014	0.000578338	0.114382	186	0.258717	7.7953e-06	0.00488156	291	0.10397	0.14188	0.737328	201	0.117117	0.0298732	0.229363	344
ALG6_29929	-0.0626235	0.365389	0.999491	211	0.0518827	0.285331	0.845276	426									0.0894633	0.206595	0.794103	201	0.0852863	0.114348	0.425473	344
ALG8_79053	-0.0116281	0.866654	0.999491	211	0.0509953	0.293662	0.847156	426	-0.122611	0.0954708	0.511069	186	-0.15964	0.00635149	0.0931124	291	-0.08498	0.230351	0.807699	201	-0.0130057	0.810058	0.929561	344
ALG9_79796	0.0277655	0.688421	0.999491	211	0.0158302	0.744582	0.965043	426									0.154755	0.0282652	0.561491	201	0.0892574	0.0983811	0.398255	344
ALKAL1_389658	0.0190396	0.783356	0.999491	211	0.00802086	0.868893	0.984977	426									0.146571	0.131943	0.728423	107	-0.0435729	0.547382	0.809979	193
ALKAL2_285016	-0.0813896	0.239123	0.999491	211	-0.066832	0.168548	0.779303	426
ALKBH1_8846	0.0576775	0.405674	0.999491	210	-0.0173361	0.723151	0.962843	420	0.0448765	0.550841	0.861465	179	-0.0576765	0.332794	0.622142	284
ALKBH2_121642	0.0971039	0.160889	0.999491	210	-0.0804578	0.0996297	0.70685	420	-0.0234081	0.75578	0.934564	179	-0.0583169	0.327445	0.617492	284	0.0645587	0.362549	0.864447	201	-0.0659748	0.222265	0.56545	344
ALKBH3_221120	-0.0754366	0.276504	0.999491	210	-0.0433799	0.375191	0.87585	420	-0.0126442	0.866591	0.968427	179	0.0747714	0.209017	0.501026	284	0.0433312	0.541344	0.925568	201	0.0351275	0.516114	0.789672	344
ALKBH4_54784	-0.0187301	0.786793	0.999491	211	0.0332009	0.494333	0.915269	426	-0.0897589	0.232129	0.673158	179	-0.0940944	0.113598	0.372504	284	0.00545323	0.955544	0.992903	107	0.0370495	0.608973	0.842593	193
ALKBH5_54890	0.088892	0.199485	0.999491	210	-0.0134617	0.78326	0.97198	420	-0.0528276	0.482477	0.832766	179	-0.0474075	0.426119	0.695744	284	-0.00690739	0.922473	0.989814	201	-0.0403414	0.455787	0.757073	344
ALKBH6_84964	-0.127768	0.0645928	0.987144	210	-0.077055	0.114842	0.730259	420
ALKBH7_84266	-0.050146	0.468734	0.999491	211	-0.0355284	0.46455	0.905268	426	0.0235752	0.754092	0.933803	179	0.000134586	0.998198	0.999295	284	-0.00725865	0.918543	0.989814	201	0.0633424	0.241306	0.583285	344
ALKBH8_91801	-0.0186586	0.787587	0.999491	211	0.00411736	0.932475	0.990865	426	-0.0633591	0.399455	0.787163	179	-0.0889841	0.134669	0.405279	284	0.165211	0.0890209	0.67819	107	0.108018	0.134845	0.45856	193
ALK_238	-0.066734	0.334703	0.999491	211	-0.0356786	0.462664	0.904971	426	0.0605989	0.421667	0.800956	178	0.0253823	0.671262	0.85339	282	0.137785	0.051109	0.622796	201	0.182657	0.000663738	0.0459048	344
ALLC_55821	0.0165981	0.810573	0.999491	211	-0.0110357	0.820337	0.977494	426									-0.0773683	0.274973	0.83408	201	-0.0183942	0.733895	0.898335	344
ALMS1P1_200420																	-0.0409625	0.675276	0.953169	107	0.00340956	0.962466	0.988121	193
ALMS1_7840	-0.0304088	0.660524	0.999491	211	0.0226638	0.640885	0.948768	426									-0.0663246	0.349541	0.860701	201	-0.0378178	0.484481	0.771698	344
ALOX12B_242	-0.0320398	0.643537	0.999491	211	-0.0309519	0.52405	0.922355	426	-0.156938	0.0359056	0.383761	179	-0.0979948	0.100536	0.350734	282	0.00154464	0.982637	0.997803	201	0.0496889	0.358198	0.68488	344
ALOX12_239	0.10869	0.115464	0.999491	211	0.0433606	0.371995	0.873645	426	0.111714	0.137648	0.573236	178	0.0784295	0.189106	0.477902	282	-0.00381998	0.957079	0.993141	201	0.0675805	0.21119	0.556348	344
ALOX15B_247	0.113576	0.0999037	0.999491	211	0.0546003	0.260816	0.830934	426	-0.0367565	0.626186	0.886056	178	0.0383443	0.521336	0.762034	282	-0.0494816	0.485443	0.911404	201	-0.102294	0.0580483	0.311802	344
ALOX15P1_100652883									0.000631618	0.993305	0.997581	179	-0.040193	0.501438	0.749572	282
ALOX15_246	0.114204	0.0980325	0.999491	211	0.0837356	0.0843047	0.687747	426	-0.147635	0.0485862	0.415089	179	-0.00810704	0.892187	0.957162	282	0.0168637	0.812184	0.974935	201	0.0488589	0.366293	0.69043	344
ALOX5AP_241	0.0531537	0.442452	0.999491	211	-0.0159138	0.74328	0.965043	426	0.043699	0.562463	0.865604	178	0.00213969	0.971464	0.991175	282	-0.0504552	0.476888	0.906664	201	-0.0954134	0.0771868	0.354925	344
ALOX5_240	-0.0377112	0.585942	0.999491	211	-0.0248829	0.608547	0.941539	426	-0.0282556	0.707318	0.917362	179	-0.00260553	0.965255	0.988305	282	0.141206	0.0455562	0.607379	201	0.0674902	0.211802	0.556579	344
ALOXE3_59344	0.0278329	0.687704	0.999491	211	0.0647387	0.182313	0.784215	426	0.0621631	0.409762	0.794279	178	0.0074595	0.900752	0.961775	282	-0.0821936	0.246052	0.816518	201	-0.137051	0.0109377	0.14396	344
ALPG_251	-0.013774	0.842341	0.999491	211	0.0397624	0.413016	0.886001	426
ALPI_248	0.0317472	0.646571	0.999491	211	0.0487112	0.315847	0.852957	426	-0.086256	0.250934	0.690261	179	0.0213971	0.719564	0.879737	284	0.0518126	0.465097	0.901154	201	-0.0147518	0.785143	0.91947	344
ALPK1_80216	-0.0977375	0.157164	0.999491	211	-0.0455941	0.347846	0.868349	426	-0.140047	0.0615119	0.44745	179	-0.0717829	0.229504	0.522603	282
ALPK2_115701	0.0729693	0.291402	0.999491	211	-0.0160022	0.741905	0.964906	426	0.108445	0.14846	0.586996	179	0.119822	0.0443824	0.228946	282	0.0681757	0.336226	0.858398	201	0.1167	0.0304652	0.231704	344
ALPK3_57538	-0.00785277	0.90972	0.999491	211	0.00923176	0.84932	0.981686	426	0.00209642	0.97778	0.995031	179	0.00300672	0.959909	0.986093	282	0.0605194	0.393414	0.879767	201	0.0488045	0.366828	0.690906	344
ALPL_249	0.0628326	0.363787	0.999491	211	0.00974768	0.841009	0.980322	426									0.0467179	0.510172	0.918533	201	0.0416429	0.441369	0.746832	344
ALPPL2_251									-0.0345675	0.645962	0.894521	179	-0.119309	0.0445433	0.229	284	-0.0284202	0.688793	0.954452	201	0.0853627	0.114023	0.424735	344
ALPP_250	0.00510642	0.941221	0.999491	211	-0.00942691	0.846174	0.981325	426	0.0148268	0.843835	0.963033	179	-0.0156336	0.793078	0.915443	284	0.171288	0.0150457	0.506665	201	-0.0204248	0.705813	0.887031	344
ALS2CL_259173	0.0205622	0.766512	0.999491	211	0.0550905	0.256553	0.828421	426	-0.0786536	0.295301	0.720631	179	-0.0156564	0.792783	0.915235	284	-0.00695397	0.921951	0.989814	201	-0.0506886	0.348597	0.676953	344
ALS2CR12_130540	-0.0530291	0.443524	0.999491	211	0.00394523	0.935291	0.991477	426									-0.101865	0.296468	0.843265	107	-0.11326	0.116813	0.429575	193
ALS2_57679	-0.0602612	0.383789	0.999491	211	-0.0811438	0.0944007	0.703019	426	-0.0811897	0.279956	0.707118	179	-0.102817	0.0836939	0.320124	284	-0.0172112	0.808387	0.974209	201	-0.0101375	0.851392	0.947342	344
ALX1_8092	0.00815415	0.90627	0.999491	211	-0.0564198	0.245237	0.822159	426	0.00808116	0.914501	0.981313	179	0.0172716	0.771965	0.904925	284	0.150735	0.0326857	0.586977	201	0.12812	0.0174335	0.178981	344
ALX3_257	0.0109115	0.874802	0.999491	211	-0.0157055	0.746525	0.965043	426	0.1005	0.180711	0.621649	179	-0.0133268	0.823063	0.929674	284	0.0606845	0.392123	0.878906	201	0.0585354	0.278965	0.620231	344
ALX4_60529	-0.0330289	0.633325	0.999491	211	0.0417157	0.390426	0.880401	426	0.0386332	0.607638	0.883485	179	0.0649681	0.275191	0.57174	284	-0.124027	0.0793957	0.666253	201	-0.0335837	0.534737	0.803111	344
ALYREF_10189	0.0636622	0.35863	0.999491	210	0.0602803	0.217644	0.806275	420	0.042377	0.56682	0.867139	185	0.0747542	0.205124	0.497072	289	0.0598073	0.399015	0.882712	201	0.0739927	0.170924	0.509759	344
AMACR_23600	0.00553301	0.936321	0.999491	211	-0.0439223	0.365826	0.871144	426									-0.180429	0.062922	0.642057	107	-0.037781	0.601916	0.839027	193
AMBN_258	-0.0498776	0.471119	0.999491	211	-0.0308981	0.524771	0.922355	426									0.0496727	0.611386	0.940122	107	-0.0567725	0.432913	0.740904	193
AMBP_259	0.00760894	0.912512	0.999491	211	-0.0609932	0.208987	0.802264	426	-0.0440449	0.559372	0.864198	178	-0.0621642	0.298208	0.592774	282	-0.130788	0.0642221	0.645883	201	-0.0548416	0.310477	0.646476	344
AMBRA1_55626	0.0924791	0.180823	0.999491	211	0.0664794	0.170811	0.780661	426	0.0081641	0.913627	0.981313	179	-0.018858	0.751679	0.895257	284
AMD1_262	0.0581958	0.400329	0.999491	211	0.0353918	0.46627	0.906548	426	0.0493563	0.512947	0.846944	178	-0.0644161	0.281013	0.576114	282	0.0179156	0.800706	0.972798	201	0.0793174	0.142083	0.469547	344
AMDHD1_144193	0.0626464	0.365214	0.999491	211	0.0194947	0.688257	0.957029	426									0.0698476	0.324482	0.856692	201	0.114566	0.0336585	0.240654	344
AMDHD2_51005	-0.0703049	0.309425	0.999491	211	0.00159984	0.973736	0.998141	426									0.0903118	0.202305	0.78865	201	0.0192094	0.722576	0.893916	344
AMELX_265	-0.0219321	0.75145	0.999491	211	0.0166935	0.731176	0.964022	426									-0.11816	0.094796	0.682849	201	0.0487866	0.367004	0.690994	344
AMER1_139285	0.034547	0.617785	0.999491	211	-0.00674318	0.889632	0.987396	426	-0.187618	0.0119052	0.265206	179	-0.147297	0.0132836	0.127067	282	0.187671	0.0529025	0.624652	107	0.0196237	0.786486	0.919901	193
AMER2_219287	0.0394585	0.568688	0.999491	211	-0.00850573	0.861045	0.984977	426
AMER3_205147	0.00965024	0.889175	0.999491	211	0.0466254	0.337039	0.864583	426									0.0695407	0.476621	0.906664	107	0.0754583	0.296959	0.635933	193
AMFR_267	0.026285	0.704236	0.999491	211	0.035008	0.471122	0.908499	426									0.0545883	0.441495	0.893902	201	0.0322094	0.551593	0.812568	344
AMHR2_269	-0.0728943	0.2919	0.999491	211	0.0221124	0.649031	0.951055	426	-0.00847896	0.91031	0.980911	179	-0.00065899	0.99121	0.997212	282	0.123069	0.0817623	0.671199	201	0.00329404	0.95146	0.983687	344
AMH_268	0.00558128	0.935767	0.999491	211	0.089715	0.0643153	0.666528	426									-0.0635741	0.36993	0.868424	201	0.0116605	0.829385	0.937936	344
AMIGO1_57463	0.0858936	0.214029	0.999491	211	0.0306115	0.528626	0.92284	426	0.0865092	0.250886	0.690261	178	0.0534153	0.371509	0.654181	282	-0.135336	0.164563	0.761673	107	-0.141484	0.0496842	0.287702	193
AMIGO2_347902	0.028234	0.683444	0.999491	211	-0.0302472	0.533545	0.923421	426	0.0241343	0.748453	0.93261	179	0.0712518	0.232978	0.52575	282	0.24701	0.0103188	0.484537	107	0.166228	0.0208654	0.193362	193
AMIGO3_386724	0.0443294	0.521905	0.999491	211	0.0315889	0.515542	0.921952	426									0.155049	0.110787	0.700846	107	0.0121243	0.867096	0.952918	193
AMMECR1L_83607	-0.0393013	0.57023	0.999491	211	-0.0591451	0.22314	0.811698	426
AMMECR1_9949	-0.0607415	0.380003	0.999491	211	0.0577839	0.233993	0.821772	426									-0.0685022	0.483245	0.910465	107	-0.0564103	0.435858	0.743642	193
AMN1_196394	0.0528192	0.445333	0.999491	211	0.0115665	0.811852	0.976894	426									0.0275224	0.778401	0.97049	107	0.0841945	0.244368	0.587599	193
AMN_81693	0.111334	0.106825	0.999491	211	0.05605	0.248349	0.823083	426
AMOTL1_154810	0.0285865	0.679709	0.999491	211	0.0369598	0.446741	0.898265	426									0.105097	0.281325	0.835562	107	0.119009	0.0992604	0.399801	193
AMOTL2_51421	0.10278	0.13674	0.999491	211	0.0103919	0.830655	0.978691	426									0.0739743	0.448902	0.895659	107	-0.0514287	0.477518	0.76798	193
AMOT_154796	-0.0111703	0.871858	0.999491	211	-0.0163427	0.736614	0.964906	426									-0.0775412	0.427272	0.890749	107	-0.0722235	0.318208	0.65258	193
AMPD1_270	-0.0129619	0.851526	0.999491	211	-0.00408297	0.933037	0.991014	426									0.0664686	0.348494	0.860453	201	0.0885251	0.101184	0.403077	344
AMPD2_271	0.0663456	0.33753	0.999491	211	-0.0397136	0.41359	0.886001	426									0.0267875	0.705818	0.957058	201	0.0811761	0.132944	0.455296	344
AMPD3_272	-0.0892603	0.196545	0.999491	211	-0.0436844	0.368432	0.871717	426									0.0999386	0.158075	0.753309	201	0.0901875	0.0949103	0.39226	344
AMPH_273	-0.0567129	0.412462	0.999491	211	-0.0504809	0.298565	0.847511	426									0.0342169	0.629647	0.943551	201	0.0292241	0.589081	0.832704	344
AMTN_401138	-0.0617433	0.37218	0.999491	211	-0.101946	0.0354264	0.596552	426									-0.136147	0.162025	0.760078	107	-0.0868566	0.229719	0.572199	193
AMT_275	0.0786166	0.25556	0.999491	211	-0.0734337	0.130218	0.7453	426	0.0232156	0.758391	0.93538	178	0.0242772	0.684792	0.861358	282	-0.0732548	0.30138	0.845267	201	-0.0558257	0.301862	0.640296	344
AMY1A&AMY1B&AMY1C_276&277&278																	-0.0251159	0.723403	0.960018	201	-0.0587171	0.277473	0.618366	344
AMY2A_279	0.0394358	0.568911	0.999491	211	0.0380449	0.433501	0.892302	426									0.00951829	0.893318	0.984775	201	0.0223715	0.679261	0.87593	344
AMY2B_280	0.0774265	0.262848	0.999491	211	0.0492383	0.310632	0.850845	426									-0.0485569	0.493644	0.914669	201	-0.055237	0.306996	0.643885	344
AMZ1_155185	0.0407005	0.556573	0.999491	211	-0.0146778	0.762596	0.967137	426									0.00152129	0.987592	0.998188	107	0.13927	0.0534022	0.298052	193
AMZ2P1_201283									0.0189048	0.801675	0.949887	179	-0.0209174	0.725596	0.883395	284
AMZ2_51321	0.0916241	0.184906	0.999491	211	0.0394476	0.416727	0.886001	426	-0.0831505	0.268466	0.699319	179	-0.0511882	0.390121	0.668663	284	0.134772	0.166346	0.762625	107	0.0759176	0.294019	0.633107	193
ANAPC10_10393	0.0848067	0.219905	0.999491	211	0.0294101	0.544936	0.9244	426									-0.0785642	0.2676	0.830137	201	-0.062761	0.245662	0.588572	344
ANAPC11_51529	-0.0666318	0.335445	0.999491	211	-0.074385	0.1253	0.74163	426									0.0818147	0.248243	0.819618	201	-0.0285409	0.597821	0.837802	344
ANAPC13_25847	-0.0441968	0.523153	0.999491	211	-0.0257117	0.596659	0.939141	426									-0.055276	0.571736	0.932215	107	0.0760289	0.29331	0.632362	193
ANAPC15_25906	-0.0150944	0.827454	0.999491	211	-0.0741656	0.126421	0.743064	426									-0.132957	0.172181	0.769176	107	-0.177044	0.0137746	0.159478	193
ANAPC16_119504	-0.00300707	0.965366	0.999491	211	-0.0126042	0.795332	0.974217	426
ANAPC1_64682	0.121254	0.0788595	0.987144	211	-0.0443731	0.360922	0.870304	426	0.05587	0.457583	0.819262	179	0.0193957	0.744839	0.892269	284	0.00991319	0.91928	0.989814	107	0.0739663	0.306639	0.643851	193
ANAPC2_29882	-0.0723013	0.295854	0.999491	211	-0.0373052	0.442502	0.895724	426									-0.0909138	0.199301	0.786187	201	-0.0806764	0.135355	0.459021	344
ANAPC4_29945	-0.0796531	0.249327	0.999491	211	-0.0762601	0.11603	0.730259	426	0.1348	0.0720058	0.466627	179	0.0990737	0.0956421	0.342417	284	0.0357264	0.614605	0.94047	201	0.0454005	0.401233	0.717772	344
ANAPC5_51433	0.0126401	0.855171	0.999491	211	-0.0405367	0.40397	0.885033	426									-0.0608405	0.390904	0.878316	201	0.00552344	0.918699	0.970411	344
ANAPC7_51434	0.00609932	0.929819	0.999491	211	-0.0850651	0.0794741	0.682598	426									0.0545795	0.576598	0.932708	107	0.0487162	0.501081	0.78098	193
ANGEL1_23357	0.036122	0.60184	0.999491	211	0.00192658	0.968374	0.997283	426	0.106931	0.155414	0.598181	178	0.111386	0.0617616	0.272261	282	-0.0535172	0.584051	0.933045	107	0.0277419	0.70174	0.885556	193
ANGEL2_90806	0.078683	0.255157	0.999491	211	-0.00102564	0.98316	0.999574	426	-0.0903397	0.229109	0.670236	179	-0.0772099	0.196099	0.484925	282	0.0910262	0.198743	0.78609	201	0.119793	0.0263	0.215462	344
ANGPT1_284	-0.00679467	0.921842	0.999491	211	0.0861938	0.0755514	0.679059	426									0.0370812	0.601241	0.93741	201	0.0763424	0.1577	0.492224	344
ANGPT2_285	0.03227	0.641154	0.999491	211	0.0461154	0.342356	0.867754	426									-0.0227713	0.748311	0.966055	201	0.00819667	0.879601	0.957349	344
ANGPT4_51378	0.00507868	0.94154	0.999491	211	0.0094349	0.846046	0.981325	426									-0.00779864	0.912507	0.988751	201	0.0167518	0.756872	0.908605	344
ANGPTL1_9068	-0.0173379	0.802301	0.999491	211	0.00567617	0.907009	0.9898	426									-0.073318	0.452947	0.897681	107	-0.084901	0.240418	0.582954	193
ANGPTL2_23452	0.104088	0.131789	0.999491	211	0.0882073	0.0689456	0.673555	426									-0.0501438	0.608006	0.939837	107	-0.0271821	0.707481	0.887454	193
ANGPTL3_27329	0.0329616	0.634017	0.999491	211	0.0421214	0.385829	0.878481	426
ANGPTL4_51129	0.0903187	0.191269	0.999491	211	0.0839597	0.0834744	0.68743	426	0.00898756	0.904954	0.980106	179	-0.11567	0.0515042	0.246398	284	-0.0403243	0.680056	0.953169	107	-0.0702638	0.331551	0.663141	193
ANGPTL5_253935	0.0937425	0.174912	0.999491	211	0.0585451	0.227879	0.815774	426	0.0133048	0.859691	0.966746	179	-0.146337	0.0135666	0.128641	284	-0.18073	0.0624758	0.641215	107	-0.194991	0.00657885	0.117892	193
ANGPTL6_83854	0.0457629	0.508521	0.999491	211	0.0702254	0.147907	0.76284	426									-0.266336	0.00555576	0.421727	107	-0.224598	0.00168854	0.0647402	193
ANGPTL7_10218	-0.0313198	0.651014	0.999491	211	-0.0733902	0.130446	0.7453	426									-0.0218108	0.823544	0.976294	107	-0.0411483	0.569914	0.822874	193
ANGPTL8_55908	0.0121757	0.860437	0.999491	211	-0.041055	0.397981	0.883577	426	-0.0161823	0.830241	0.958413	178	-0.0753613	0.207055	0.49887	282
ANG_283	0.0833782	0.2278	0.999491	211	0.0393511	0.417869	0.886416	426									-0.01536	0.82866	0.976513	201	-0.0461718	0.393272	0.712235	344
ANHX_647589	0.0563435	0.415518	0.999491	211	0.0251241	0.605077	0.941251	426
ANK1_286	-0.0495985	0.473608	0.999491	211	-0.0149282	0.758671	0.966556	426	-0.00307946	0.967366	0.993614	179	-3.29589e-05	0.999559	0.999684	284	-0.0445451	0.530063	0.923782	201	-0.0483461	0.371351	0.695428	344
ANK2_287	-0.0171875	0.803982	0.999491	211	-0.0244435	0.614894	0.943585	426	-0.0455533	0.536973	0.857158	186	-0.0702164	0.23243	0.525636	291	-0.00953764	0.893103	0.984775	201	0.00390965	0.942403	0.979989	344
ANK3_288	-0.0496278	0.473346	0.999491	211	0.0321979	0.507473	0.920034	426	-0.0546834	0.46847	0.825646	178	-0.0110017	0.854064	0.943162	282	-0.0165113	0.816038	0.975582	201	0.0803181	0.137105	0.461561	344
ANKAR_150709	-0.0741419	0.283696	0.999491	211	-0.0149678	0.75805	0.966322	426	-0.0703008	0.35109	0.757282	178	0.032885	0.582368	0.801187	282
ANKDD1A_348094	0.0326087	0.637655	0.999491	211	0.115812	0.0167864	0.496981	426
ANKDD1B_728780	0.00157971	0.981802	0.999491	211	-0.0506385	0.297057	0.847156	426
ANKEF1_63926	0.0331233	0.632354	0.999491	211	0.0204795	0.673394	0.954444	426									0.0977711	0.167337	0.762625	201	0.0994496	0.0654207	0.326189	344
ANKFN1_162282	0.0347189	0.616036	0.999491	211	0.0330527	0.496263	0.916269	426
ANKFY1_51479	0.171667	0.0125122	0.98243	211	0.0383453	0.429877	0.891342	426	-0.0691966	0.358727	0.762991	178	0.00310205	0.958639	0.986093	282	0.11475	0.104786	0.695708	201	0.0704346	0.192496	0.537723	344
ANKHD1-EIF4EBP3_404734									-0.226726	0.00208527	0.147178	182	-0.150775	0.0106714	0.117436	286	-0.0125738	0.859383	0.979988	201	-0.128177	0.0173834	0.178941	344
ANKHD1_54882	0.0115135	0.867956	0.999491	211	0.0260318	0.592095	0.939141	426	-0.0369267	0.624587	0.885683	178	-0.0143658	0.810188	0.923668	282	-0.0662676	0.497662	0.915772	107	0.0719578	0.319996	0.653696	193
ANKH_56172	0.0267705	0.699035	0.999491	211	-0.0153683	0.751786	0.965534	426	-0.0244648	0.745126	0.93202	179	-0.0222405	0.70999	0.875959	282	0.0700462	0.323105	0.856403	201	0.0201711	0.709301	0.888119	344
ANKIB1_54467	-0.0698975	0.312244	0.999491	211	0.0105632	0.827907	0.978505	426	0.102539	0.173198	0.614864	178	0.0117659	0.844053	0.93884	282
ANKK1_255239	-0.000974452	0.988774	0.999491	211	-0.0673951	0.164982	0.776407	426	-0.149533	0.0457329	0.409338	179	-0.10487	0.078731	0.309935	282	-0.0901902	0.202916	0.789929	201	-0.0636369	0.239121	0.5811	344
ANKLE1_126549	0.0467458	0.499449	0.999491	211	0.0652516	0.178866	0.783269	426									0.0172335	0.860149	0.980204	107	0.0124687	0.863357	0.951807	193
ANKLE2_23141	-0.115433	0.0944457	0.999491	211	-0.0354935	0.464989	0.905556	426	-0.174189	0.0196995	0.312148	179	-0.209327	0.000383025	0.0215114	284
ANKMY1_51281	-0.0644646	0.351435	0.999491	211	-0.0243566	0.616151	0.943882	426									-0.0122244	0.900548	0.985592	107	0.031005	0.668622	0.871132	193
ANKMY2_57037	0.0455792	0.510226	0.999491	211	0.0611036	0.208162	0.802264	426									0.00143999	0.988255	0.998293	107	0.0815294	0.259674	0.602093	193
ANKRA2_57763	-0.0968371	0.161041	0.999491	211	0.00242201	0.960248	0.996039	426	-0.0263926	0.726563	0.927142	178	0.0285213	0.633416	0.83048	282	0.112055	0.250507	0.820579	107	0.0552335	0.445507	0.750374	193
ANKRD10_55608	0.124053	0.0721422	0.987144	211	-0.0062671	0.897379	0.988524	426									-0.13043	0.18055	0.780392	107	-0.0866069	0.231066	0.573132	193
ANKRD11_29123	-0.00316093	0.963595	0.999491	211	0.0286187	0.555815	0.927606	426	-0.0221303	0.769361	0.940516	178	-0.0354444	0.553345	0.782295	282	0.0853973	0.381802	0.873563	107	0.149726	0.0376839	0.252962	193
ANKRD12_23253	0.116793	0.0906006	0.999491	211	0.142926	0.00311166	0.329914	426	0.0546494	0.468747	0.825899	178	0.0783239	0.189704	0.478157	282	-0.0767298	0.43214	0.891713	107	0.050776	0.483133	0.770721	193
ANKRD13A_88455	0.070417	0.308652	0.999491	211	0.0228134	0.638683	0.948439	426	-0.102105	0.17381	0.61504	179	0.0174817	0.770068	0.904328	282	-0.159987	0.0997423	0.688699	107	-0.00226292	0.975083	0.991436	193
ANKRD13B_124930	-0.00672332	0.922661	0.999491	211	0.0848718	0.0801624	0.682598	426									0.0134991	0.890239	0.984775	107	-0.108059	0.134695	0.458517	193
ANKRD13C_81573	-0.0931828	0.177512	0.999491	211	0.000930844	0.984717	0.999587	426									0.0569977	0.559801	0.929119	107	0.065402	0.366176	0.69043	193
ANKRD13D_338692	-0.101579	0.14141	0.999491	211	0.0136183	0.779274	0.970421	426									-0.121654	0.211934	0.796963	107	-0.159095	0.027108	0.218678	193
ANKRD16_54522	0.0623984	0.367119	0.999491	211	0.030041	0.53634	0.923421	426									-0.0700125	0.473628	0.905448	107	-0.042307	0.559092	0.817471	193
ANKRD17_26057	0.0578978	0.40275	0.999491	211	0.0546084	0.260745	0.830888	426	0.0132203	0.860573	0.967039	179	-0.0420418	0.481945	0.736164	282	0.0624998	0.378089	0.871612	201	0.126871	0.0185699	0.184026	344
ANKRD18A&ANKRD18B_253650&441459									0.0393993	0.597452	0.8796	182	0.0101141	0.864774	0.946811	286
ANKRD18A_253650	0.0150704	0.827724	0.999491	211	0.0202579	0.676727	0.955048	426
ANKRD18DP_348840																	0.0783997	0.422157	0.889045	107	0.0826311	0.253269	0.595798	193
ANKRD1_27063	0.0497287	0.47351	0.999491	210	0.0366135	0.454239	0.900999	420									-0.243149	0.011616	0.494999	107	-0.215113	0.00266209	0.0794431	193
ANKRD20A11P_391267																	-0.00342997	0.972029	0.995647	107	-0.0388806	0.591377	0.834537	193
ANKRD20A19P_400110																	0.0319528	0.743877	0.96453	107	0.0171604	0.812759	0.931312	193
ANKRD20A2&ANKRD20A1_441430&84210																	0.0374934	0.701413	0.956216	107	0.00276014	0.969611	0.989936	193
ANKRD20A2&ANKRD20A4&ANKRD20A1_441430&728747&84210									-0.13427	0.0707438	0.466627	182	-0.129182	0.0289428	0.185175	286
ANKRD20A21P_102723552									0.101044	0.174705	0.615403	182	0.182787	0.00191014	0.0491399	286	-0.0539342	0.58112	0.933029	107	-0.0179231	0.8046	0.927107	193
ANKRD20A3_441425									0.13352	0.0723475	0.466627	182	0.122276	0.0387737	0.215006	286	-0.0464	0.635084	0.944441	107	-0.0148841	0.837225	0.94065	193
ANKRD20A4-ANKRD20A20P_110006327									-0.0761366	0.306996	0.732583	182	-0.0734612	0.215503	0.508623	286	0.0338802	0.72901	0.961965	107	0.155206	0.0311409	0.233873	193
ANKRD20A4_728747																	-0.166167	0.0871602	0.67819	107	-0.161387	0.0249474	0.209626	193
ANKRD20A5P_440482									0.0322531	0.665573	0.899651	182	0.131813	0.0258055	0.173523	286	0.0638118	0.513765	0.918947	107	0.0351158	0.627801	0.851495	193
ANKRD20A8P_729171									0.226064	0.00215076	0.147865	182	0.189992	0.00124469	0.0411885	286	-0.0126636	0.896994	0.985228	107	0.0731747	0.311859	0.647806	193
ANKRD20A9P_284232									0.0272363	0.715131	0.921352	182	0.0557211	0.347766	0.635659	286	-0.0219447	0.822478	0.976294	107	-0.0343499	0.635325	0.855973	193
ANKRD22_118932	-0.0269941	0.696645	0.999491	211	0.0788153	0.104274	0.714307	426									0.0334512	0.732311	0.963044	107	0.0252118	0.727815	0.895829	193
ANKRD23_200539	-0.112554	0.103015	0.999491	211	-0.0514963	0.288939	0.846586	426	-0.0492803	0.5124	0.846944	179	-0.0763247	0.201291	0.491462	282
ANKRD24_170961	-0.0310346	0.653985	0.999491	211	0.004646	0.923829	0.990242	426	0.0236515	0.753321	0.933688	179	0.0879128	0.140858	0.414219	282
ANKRD26P1_124149																	-0.119623	0.219721	0.798819	107	-0.181306	0.0116235	0.147401	193
ANKRD26_22852	-0.0176746	0.798543	0.999491	211	0.0149677	0.758053	0.966322	426	-0.182489	0.0144852	0.288299	179	-0.315062	6.45997e-08	0.000515182	282	0.0651146	0.505189	0.917827	107	0.0523355	0.469778	0.763298	193
ANKRD27_84079	-0.107048	0.121097	0.999491	211	-0.0842136	0.0825415	0.685422	426	-0.0627849	0.403749	0.789578	179	-0.0651206	0.275774	0.57174	282	0.0612689	0.530714	0.923973	107	0.0309458	0.669218	0.871434	193
ANKRD28_23243	-0.052087	0.451676	0.999491	211	0.0123612	0.799192	0.974463	426	-0.032122	0.670362	0.90283	178	-0.0471307	0.430473	0.69919	282	-0.186823	0.0540031	0.62668	107	-0.0239794	0.740633	0.90224	193
ANKRD29_147463	0.0186195	0.788022	0.999491	211	-0.00026792	0.995601	0.999946	426	-0.145666	0.0478832	0.415089	185	-0.202456	0.000534667	0.0258422	289	0.0497073	0.483453	0.910595	201	-0.0771319	0.153435	0.486442	344
ANKRD2_26287	-0.0585794	0.397225	0.999491	211	-0.0626276	0.19702	0.795629	426									0.139506	0.15182	0.74524	107	-0.00696724	0.92339	0.972722	193
ANKRD30A_91074	0.113502	0.100128	0.999491	211	0.087237	0.0720677	0.67448	426	0.11125	0.13818	0.573565	179	0.210213	0.000379135	0.021444	282	0.00153974	0.982693	0.997803	201	-0.0375669	0.487387	0.773656	344
ANKRD30B_374860	0.166083	0.0157372	0.98243	211	-0.00111639	0.981671	0.999292	426	-0.114228	0.127871	0.558473	179	-0.167477	0.00480428	0.0798211	282	-0.127659	0.19007	0.782928	107	-0.0242107	0.738222	0.900677	193
ANKRD31_256006	-0.0391312	0.571901	0.999491	211	0.034124	0.482401	0.911418	426	-0.273012	0.000226859	0.0999181	178	-0.263573	7.25534e-06	0.00488156	282
ANKRD33B_651746	-0.125294	0.0693155	0.987144	211	0.0257458	0.596172	0.939141	426	-0.0380727	0.61387	0.88414	178	-0.0895277	0.133676	0.404273	282
ANKRD33_341405	-0.00134497	0.984505	0.999491	211	-0.00508213	0.916704	0.990242	426									0.00398599	0.967497	0.994536	107	0.0376516	0.603162	0.839742	193
ANKRD34A_284615	0.0849356	0.219202	0.999491	211	0.00873622	0.85732	0.984318	426
ANKRD34B_340120	-0.0403081	0.560387	0.999491	211	0.0351342	0.469524	0.907959	426									-0.0598886	0.54003	0.925568	107	0.00786052	0.913604	0.968407	193
ANKRD34C_390616	0.103701	0.133238	0.999491	211	0.0821431	0.0903991	0.699746	426									0.0934989	0.338113	0.858398	107	0.0376697	0.602987	0.839682	193
ANKRD35_148741	0.00581199	0.933117	0.999491	211	-0.031439	0.517536	0.922024	426									0.0256386	0.717889	0.958617	201	-0.0755592	0.162019	0.4977	344
ANKRD36B_57730	-0.097817	0.156825	0.999491	211	-0.00706634	0.884379	0.987179	426	0.059473	0.430359	0.804812	178	0.172313	0.00370179	0.0685209	282
ANKRD36C_400986									-0.0436613	0.562801	0.865636	178	0.0658832	0.270179	0.568366	282	0.014577	0.881536	0.983757	107	0.124054	0.0856383	0.372017	193
ANKRD36_375248									-0.0540403	0.473725	0.827174	178	-0.156671	0.00839958	0.104995	282
ANKRD37_353322	-0.0475775	0.491839	0.999491	211	-0.0131123	0.787274	0.972781	426									0.133842	0.0581939	0.631906	201	0.131097	0.0149681	0.166676	344
ANKRD39_51239	-0.0906315	0.18973	0.999491	211	-0.0510306	0.293327	0.847156	426
ANKRD40_91369	0.0182061	0.792621	0.999491	211	0.0340163	0.483785	0.911418	426									0.0864693	0.222254	0.799457	201	0.141386	0.00863987	0.131601	344
ANKRD42_338699	-0.0249485	0.718621	0.999491	211	0.00712632	0.883404	0.986892	426	0.112498	0.133785	0.568544	179	0.0957833	0.108489	0.363682	282
ANKRD44_91526	-0.00619304	0.928744	0.999491	211	-0.0668096	0.168691	0.779303	426									0.078729	0.420205	0.888233	107	0.00796999	0.912405	0.968196	193
ANKRD45_339416	-0.0539443	0.435685	0.999491	211	0.0437677	0.367518	0.871144	426									0.165175	0.0890897	0.67819	107	0.0622	0.390159	0.709617	193
ANKRD46_157567	0.154494	0.0248117	0.98243	211	0.0814537	0.0931448	0.701914	426	-0.0690558	0.350299	0.757276	185	-0.112373	0.0563766	0.258929	289	-0.142835	0.142192	0.737328	107	-0.167375	0.0199879	0.189315	193
ANKRD49_54851	0.0210592	0.761037	0.999491	211	0.132175	0.00629436	0.395867	426									-0.0119426	0.866375	0.981683	201	0.0169696	0.753813	0.907644	344
ANKRD50_57182	-0.112187	0.10415	0.999491	211	-0.0432724	0.372969	0.874234	426	-0.110628	0.14041	0.576346	179	-0.0862208	0.148696	0.424277	282
ANKRD52_283373	0.0911733	0.187085	0.999491	211	0.0434109	0.37144	0.873554	426
ANKRD53_79998	0.0345411	0.617845	0.999491	211	-0.0457746	0.34594	0.868349	426
ANKRD54_129138	0.123201	0.0741353	0.987144	211	0.0683001	0.159368	0.772717	426
ANKRD55_79722	-0.0262744	0.70435	0.999491	211	0.00928865	0.848403	0.981686	426
ANKRD60_140731																	0.0350858	0.62097	0.941767	201	0.00274059	0.959608	0.98729	344
ANKRD61_100310846	-0.00159543	0.981621	0.999491	211	0.0294961	0.54376	0.9244	426
ANKRD62P1-PARP4P3_23783									-0.0696647	0.35411	0.760373	179	-0.0873045	0.143639	0.418379	282
ANKRD62_342850	0.0989281	0.152146	0.999491	211	0.128446	0.00794734	0.419067	426	-0.0680922	0.361061	0.763438	182	-0.0646134	0.276125	0.571825	286
ANKRD65_441869	-0.0211266	0.760295	0.999491	211	-0.0849539	0.0798694	0.682598	426	-0.185426	0.0129536	0.27423	179	-0.123774	0.0377755	0.212197	282
ANKRD66_100287718	-0.00635177	0.926922	0.999491	211	0.0281645	0.562107	0.930445	426									-0.151609	0.11903	0.706255	107	-0.209906	0.00339102	0.0861598	193
ANKRD6_22881	0.111771	0.105446	0.999491	211	0.0232179	0.632743	0.947857	426	-0.227874	0.0022197	0.148878	178	-0.153276	0.00994433	0.114109	282	-0.256015	0.00777589	0.446181	107	-0.211543	0.00314442	0.0842645	193
ANKRD7_56311	0.00380401	0.956195	0.999491	211	0.0353427	0.46689	0.906548	426	0.185163	0.0133453	0.276375	178	0.0684918	0.251625	0.546082	282
ANKRD9_122416	-0.0102956	0.881816	0.999491	211	-0.00377426	0.93809	0.991867	426
ANKS1A_23294	0.174055	0.0113207	0.98243	211	0.0998165	0.0394673	0.60601	426	-0.0342328	0.649161	0.895674	179	0.06758	0.258007	0.553864	282	-0.0764201	0.434005	0.891713	107	-0.0190894	0.792166	0.922166	193
ANKS1B_56899	0.00739655	0.914944	0.999491	211	-0.0279973	0.564431	0.931321	426
ANKS3_124401	0.0644398	0.351621	0.999491	211	0.0560304	0.248515	0.823083	426									-0.00727679	0.940701	0.990913	107	0.0921779	0.202319	0.548032	193
ANKS4B_257629	0.00709934	0.91835	0.999491	211	-0.0117608	0.808753	0.976608	426									-0.0214997	0.826021	0.976427	107	-0.00729763	0.919769	0.970826	193
ANKS6_203286	0.0230438	0.739296	0.999491	211	-0.0334914	0.490561	0.914152	426	-0.0302763	0.687445	0.908129	179	0.00187998	0.974837	0.992477	284	0.208201	0.0313982	0.57432	107	0.0744182	0.303685	0.641889	193
ANKUB1_389161																	0.0577584	0.554565	0.926832	107	0.00231464	0.974514	0.991359	193
ANKZF1_55139	-0.124372	0.0714059	0.987144	211	0.00733281	0.880051	0.98639	426	-0.168419	0.0242197	0.333045	179	-0.111607	0.0612451	0.270898	282	-0.009801	0.92019	0.989814	107	0.0664478	0.358545	0.684997	193
ANLN_54443	-0.0848533	0.21965	0.999491	211	-0.0218108	0.653504	0.951663	426									-0.0536424	0.583171	0.933029	107	0.0585353	0.41874	0.730304	193
ANO10_55129	0.0265423	0.701478	0.999491	211	0.0206692	0.670546	0.954221	426									0.0870332	0.372716	0.87012	107	0.116032	0.108069	0.414253	193
ANO1_55107	-0.0666609	0.335233	0.999491	211	-0.0047121	0.922749	0.990242	426	-0.00641571	0.930932	0.983171	185	-0.140995	0.0164617	0.140247	289	-0.110741	0.117571	0.704549	201	-0.0470911	0.38391	0.704527	344
ANO2_57101	-0.0182533	0.792095	0.999491	211	-0.032416	0.504601	0.919159	426									0.135492	0.164073	0.761643	107	0.0528079	0.465773	0.761517	193
ANO3_63982	0.0249952	0.718117	0.999491	211	-0.0162069	0.738723	0.964906	426									0.0373974	0.702141	0.956216	107	0.0632448	0.382231	0.703322	193
ANO4_121601	-0.0920767	0.182736	0.999491	211	-0.0477613	0.325387	0.858179	426
ANO5_203859	-0.0726382	0.293602	0.999491	211	-0.0575339	0.236026	0.822159	426									-0.0315383	0.747086	0.965853	107	-0.0359018	0.620117	0.84722	193
ANO6_196527	-0.0031251	0.964008	0.999491	211	-0.0614269	0.205761	0.801143	426									-0.00540494	0.955937	0.992903	107	0.0509086	0.481989	0.769862	193
ANO7_50636	-0.0135554	0.844811	0.999491	211	-0.0461451	0.342046	0.867393	426
ANO8_57719	-0.0537573	0.437281	0.999491	211	-0.0216739	0.655537	0.952001	426									0.111552	0.252653	0.821503	107	0.165375	0.0215397	0.196674	193
ANO9_338440	-0.0453718	0.512155	0.999491	211	-0.0294769	0.544023	0.9244	426
ANOS1_3730	0.0389089	0.574089	0.999491	211	-0.022205	0.64766	0.950497	426									0.0736964	0.298468	0.843878	201	0.00551316	0.91885	0.970411	344
ANP32AP1_723972																	0.0933354	0.187543	0.782928	201	0.0711193	0.188197	0.532102	344
ANP32A_8125	-0.00549176	0.936795	0.999491	211	0.0404518	0.404956	0.885504	426									0.000741639	0.991663	0.999171	201	0.0208506	0.699974	0.884953	344
ANP32B_10541	0.018949	0.784867	0.999491	210	-0.0390931	0.42424	0.889264	420									-0.0486058	0.493209	0.91433	201	-0.0290095	0.59182	0.834745	344
ANP32C_23520																	0.0735444	0.451549	0.897329	107	0.0292445	0.686416	0.879139	193
ANP32D_23519	0.0155693	0.822114	0.999491	211	0.0505343	0.298053	0.847391	426									0.114741	0.23926	0.814497	107	-0.0438311	0.545008	0.808474	193
ANP32E_81611	0.155191	0.0245028	0.98243	210	0.0365231	0.455353	0.901602	420									0.029704	0.675514	0.953169	201	0.00273992	0.959618	0.98729	344
ANPEP_290	0.0198176	0.774737	0.999491	211	0.00121357	0.980075	0.999148	426	-0.132837	0.0714617	0.466627	185	-0.141853	0.0158104	0.13765	289	-0.0366442	0.605537	0.93902	201	-0.0432941	0.423457	0.73379	344
ANTXR1_84168	-0.066207	0.338542	0.999491	211	-0.0522197	0.282209	0.843274	426	-0.0128643	0.864292	0.967849	179	0.0049594	0.933921	0.975985	282	0.11058	0.118108	0.705741	201	0.115025	0.0329483	0.238384	344
ANTXR2_118429	-0.0692038	0.317082	0.999491	211	-0.0549315	0.25793	0.828477	426	0.0195019	0.795548	0.94852	179	0.0560815	0.348078	0.635659	282	0.0753805	0.287532	0.839329	201	0.0866701	0.108569	0.415312	344
ANTXRL_195977	-0.0470233	0.496903	0.999491	211	-0.107174	0.0269714	0.566035	426									0.130182	0.0654783	0.649934	201	0.143413	0.00772138	0.125324	344
ANXA10_11199	0.0670506	0.33241	0.999491	211	0.0119261	0.806117	0.976229	426									0.0296278	0.676299	0.953169	201	0.00214667	0.968356	0.989872	344
ANXA11_311	-0.00555761	0.936038	0.999491	211	-0.00215916	0.964559	0.996529	426									-0.0290038	0.682745	0.953691	201	0.03791	0.483416	0.771026	344
ANXA13_312	0.0288872	0.676528	0.999491	211	0.0658212	0.175095	0.783036	426	-0.0560191	0.456381	0.819001	179	-0.131728	0.0264312	0.176167	284	0.0125445	0.859708	0.980158	201	-0.0476491	0.378294	0.700909	344
ANXA1_301	-0.0780271	0.259152	0.999491	211	-0.0446806	0.3576	0.869362	426									-0.092923	0.189508	0.782928	201	-0.137958	0.0104164	0.141546	344
ANXA2P1&ANXA2P2_303&304																	0.0244787	0.730144	0.962551	201	0.0751431	0.16435	0.499941	344
ANXA2R_389289	0.0534913	0.439556	0.999491	211	-0.101514	0.0362175	0.599002	426
ANXA2_302	0.0256424	0.71114	0.999491	211	0.0520875	0.283431	0.843478	426									-0.0148736	0.834006	0.97736	201	-0.0791241	0.14306	0.471567	344
ANXA3_306	0.0102686	0.882123	0.999491	211	-0.0181752	0.70836	0.961115	426									0.00266201	0.970082	0.995251	201	-0.0354305	0.512499	0.788369	344
ANXA4_307	-0.00618269	0.928863	0.999491	211	-0.0409291	0.39943	0.884322	426	-0.0615359	0.413184	0.796727	179	0.041238	0.488821	0.741695	284	-0.0877286	0.215568	0.798417	201	-0.0995749	0.0650805	0.325551	344
ANXA5_308	-0.0941188	0.173179	0.999491	211	-0.0160524	0.741123	0.964906	426									0.093487	0.186824	0.782928	201	-0.0256038	0.63605	0.856586	344
ANXA6_309	0.0893007	0.196342	0.999491	211	0.15513	0.00131854	0.259681	426	0.171669	0.0219492	0.32401	178	0.0373144	0.532596	0.769864	282	0.0656751	0.354291	0.86224	201	-0.017537	0.74586	0.904195	344
ANXA7_310	-0.0954478	0.167162	0.999491	211	-0.0715544	0.140369	0.755769	426									-0.0440359	0.534782	0.925467	201	0.108809	0.0437222	0.27012	344
ANXA8&ANXA8L1_653145&728113																	0.021255	0.764561	0.968321	201	0.000371786	0.994518	0.997671	344
ANXA8L1_728113	-0.0463015	0.503539	0.999491	211	-0.0624203	0.19851	0.795982	426
ANXA8_653145	-0.0317089	0.646969	0.999491	211	0.00757123	0.876182	0.98639	426
ANXA9_8416	0.0179549	0.795418	0.999491	211	0.00294071	0.951744	0.994386	426									0.0387128	0.58532	0.933253	201	0.0461492	0.393505	0.712328	344
AOAH_313	-0.0886876	0.199444	0.999491	211	-0.0687328	0.156736	0.769619	426									-0.148803	0.0350107	0.59383	201	-0.105356	0.0508919	0.290823	344
AOC1_26	0.035651	0.60659	0.999491	211	0.0287704	0.553722	0.926828	426									-0.130988	0.0638122	0.643693	201	-0.0248403	0.646153	0.860202	344
AOC2_314	0.00657837	0.924323	0.999491	211	0.0925656	0.0562595	0.648988	426									0.103954	0.141944	0.737328	201	0.0484699	0.370126	0.694156	344
AOC3_8639	0.0622376	0.368357	0.999491	211	0.0647883	0.181978	0.784085	426									0.0636816	0.36912	0.867747	201	0.0719061	0.183345	0.525297	344
AOX1_316	0.0132856	0.847863	0.999491	211	0.0112898	0.816273	0.977154	426									0.0428983	0.545396	0.925568	201	0.0683085	0.206302	0.551203	344
AP1AR_55435	-0.109654	0.112252	0.999491	211	-0.0547951	0.259116	0.829639	426									0.00831524	0.932258	0.990322	107	0.0418596	0.563259	0.82022	193
AP1B1_162	0.148007	0.0316341	0.98243	211	0.0256936	0.596917	0.939141	426									0.0902707	0.202511	0.789087	201	-0.00651913	0.904108	0.96597	344
AP1G1_164	0.0582588	0.399818	0.999491	211	0.00968196	0.842067	0.980322	426									0.203986	0.00367754	0.38753	201	0.124261	0.0211527	0.194825	344
AP1G2_8906	0.0360098	0.60297	0.999491	211	0.0570885	0.239679	0.822159	426	-0.00556974	0.94118	0.984511	178	0.0304994	0.61004	0.815056	282	-0.0591885	0.403921	0.883395	201	-0.0286243	0.596752	0.837147	344
AP1M1_8907	-0.0841844	0.22332	0.999491	211	-0.112022	0.0207447	0.533249	426									-0.00323307	0.963668	0.993704	201	0.0869176	0.107559	0.413187	344
AP1M2_10053	-0.0432136	0.532446	0.999491	211	0.00200755	0.967046	0.996845	426									0.233131	0.0156662	0.506665	107	0.226746	0.00151919	0.0617815	193
AP1S1_1174	0.0360771	0.602292	0.999491	211	0.134756	0.00533827	0.383542	426									-0.0130984	0.853581	0.979813	201	0.0145795	0.787592	0.920264	344
AP1S2_8905	-0.0320623	0.643304	0.999491	211	0.0367931	0.448794	0.898982	426	-0.066416	0.377054	0.774314	179	-0.0741378	0.212912	0.505483	284	-0.153019	0.0301075	0.566799	201	-0.082019	0.128952	0.448813	344
AP1S3_130340	0.0422603	0.541535	0.999491	211	-0.0173261	0.721403	0.962684	426									0.0422368	0.551615	0.925568	201	-0.140602	0.00902086	0.13352	344
AP2A1_160	-0.0248722	0.719446	0.999491	211	-0.0141961	0.770166	0.969591	426									0.0547402	0.440224	0.893902	201	0.0608732	0.260181	0.602533	344
AP2A2_161	-0.0870963	0.20766	0.999491	211	-0.0203377	0.675526	0.954896	426	-0.044374	0.555314	0.86236	179	0.000361606	0.995159	0.99843	284	0.063061	0.373813	0.870952	201	0.0295785	0.58457	0.830922	344
AP2B1_163	-0.0168045	0.808264	0.999491	211	0.12269	0.0112631	0.457901	426									0.0724853	0.458109	0.898748	107	0.134943	0.0613347	0.317474	193
AP2M1_1173	0.0763764	0.269396	0.999491	211	0.0904436	0.062171	0.66102	426	-0.0145966	0.846229	0.963033	179	-0.0741737	0.21269	0.505264	284	0.049248	0.487508	0.911934	201	0.0387244	0.474063	0.765832	344
AP2S1_1175	0.0616695	0.372753	0.999491	211	0.0688239	0.156186	0.769619	426	0.01867	0.804088	0.95022	179	-0.108866	0.0679284	0.286482	282	0.0461305	0.515512	0.919068	201	0.0727719	0.178112	0.517506	344
AP3B1_8546	-0.0424738	0.539493	0.999491	211	0.0168079	0.729406	0.964022	426									0.160969	0.0224419	0.53862	201	0.0939977	0.0816995	0.36399	344
AP3B2_8120	-0.0904409	0.190667	0.999491	211	-0.00191084	0.968633	0.997366	426
AP3D1_8943	0.0803962	0.244924	0.999491	211	0.0655041	0.177187	0.783037	426									-0.0431301	0.543225	0.925568	201	-0.0150375	0.781085	0.91756	344
AP3M1_26985	-0.107823	0.118412	0.999491	211	0.0365371	0.451959	0.900093	426									-0.0741048	0.295791	0.843265	201	-0.0716509	0.184908	0.527759	344
AP3M2_10947	-0.00722237	0.91694	0.999491	211	0.034128	0.48235	0.911418	426	0.00874965	0.907459	0.980178	179	0.0598392	0.314954	0.606325	284	-0.10628	0.133192	0.729489	201	-0.0532641	0.324622	0.657918	344
AP3S1_1176	0.0756783	0.27381	0.999491	211	-0.0115796	0.811643	0.976894	426									0.145596	0.0391788	0.60281	201	0.0671634	0.214028	0.557947	344
AP3S2_10239	0.0578075	0.403485	0.999491	211	0.0701624	0.148272	0.76284	426									-0.0553708	0.434968	0.891981	201	-0.0558868	0.301332	0.639577	344
AP4B1_10717	0.0425138	0.539111	0.999491	211	0.0561613	0.24741	0.823083	426									0.0406113	0.677905	0.953169	107	0.0763096	0.291526	0.631157	193
AP4E1_23431	-0.0660283	0.33985	0.999491	211	-0.0133014	0.784282	0.97205	426									-0.248344	0.00990143	0.478094	107	-0.271656	0.000132606	0.0182115	193
AP4M1_9179	0.0510898	0.460396	0.999491	211	0.0584446	0.228679	0.816262	426									-0.0139867	0.843774	0.978031	201	-0.000956717	0.985894	0.995166	344
AP4S1_11154	0.17372	0.0114815	0.98243	211	0.0326436	0.501612	0.917869	426									-0.0344004	0.62781	0.943551	201	-0.0201784	0.709201	0.888092	344
AP5B1_91056	0.0428378	0.53602	0.999491	211	0.0557126	0.251213	0.825637	426
AP5M1_55745	-0.0400726	0.562682	0.999491	211	0.028283	0.560462	0.92952	426	0.0427904	0.569529	0.867887	179	-0.0727199	0.223466	0.516767	282	0.0803602	0.256781	0.824524	201	0.139514	0.0095736	0.13659	344
AP5S1_55317	-0.00627207	0.927837	0.999491	211	0.0413148	0.394999	0.882598	426
AP5Z1_9907	-0.0344488	0.618786	0.999491	211	-0.0502392	0.300888	0.847511	426
APAF1_317	-0.0364914	0.598128	0.999491	211	0.037029	0.44589	0.897875	426	-0.0741353	0.323999	0.744424	179	-0.0754666	0.204803	0.496445	284	0.0583037	0.410996	0.885235	201	0.0523768	0.332758	0.663733	344
APBA1_320	0.0513153	0.458416	0.999491	211	-0.00378948	0.93784	0.991867	426									-0.0436579	0.538297	0.925568	201	-0.0217402	0.687831	0.880235	344
APBA2_321	-0.00301167	0.965313	0.999491	211	0.0430662	0.375254	0.87585	426									0.0474144	0.503879	0.917364	201	0.0461442	0.393555	0.712328	344
APBA3_9546	-0.0451975	0.513779	0.999491	211	-0.0349964	0.471269	0.908686	426									-0.0587515	0.547765	0.925568	107	-0.18769	0.00895407	0.133127	193
APBB1IP_54518	0.113391	0.100462	0.999491	211	0.0529753	0.275295	0.838392	426									0.0926071	0.191024	0.782928	201	0.13174	0.0144777	0.164123	344
APBB1_322	-0.060251	0.385012	0.999491	210	0.00929793	0.849319	0.981686	420									-0.0150766	0.831774	0.97699	201	-0.0203777	0.706461	0.887113	344
APBB2_323	-0.01087	0.875274	0.999491	211	0.0663955	0.171353	0.780767	426									-0.00804761	0.909725	0.988179	201	-0.0542811	0.315456	0.650198	344
APBB3_10307	-0.0371888	0.591147	0.999491	211	0.0474345	0.328713	0.860685	426									-0.0592824	0.403174	0.883395	201	-0.0777479	0.150168	0.482004	344
APC2_10297	0.169408	0.0137389	0.98243	211	0.0151526	0.755158	0.966249	426	-0.112952	0.133315	0.568544	178	-0.0314273	0.599208	0.810209	282	-0.0886063	0.364104	0.865658	107	-0.100944	0.162466	0.498176	193
APCDD1L_164284	0.000983043	0.988675	0.999491	211	-0.0637847	0.188856	0.790982	426	-0.0413826	0.582307	0.875341	179	0.0541057	0.365351	0.648636	282
APCDD1_147495	0.160448	0.0197043	0.98243	211	0.128869	0.0077418	0.416936	426									-0.0599203	0.539816	0.925568	107	-0.0045005	0.95047	0.983153	193
APCS_325	-0.100055	0.147508	0.999491	211	-0.0798797	0.0996637	0.70685	426									0.114373	0.240781	0.814497	107	0.052949	0.46458	0.760773	193
APC_324	-0.00428233	0.950694	0.999491	211	-0.00817982	0.866319	0.984977	426	0.00108822	0.988498	0.996835	178	0.040554	0.497599	0.747035	282	-0.110419	0.11865	0.706255	201	-0.11172	0.0383554	0.25583	344
APEH_327	0.0784644	0.256484	0.999491	211	0.0198201	0.683333	0.955977	426									-0.0294326	0.678313	0.953169	201	0.00423304	0.937649	0.97815	344
APEX1_328	0.0165056	0.812054	0.999491	210	-0.0308356	0.528559	0.92284	420	0.0179731	0.811262	0.951163	179	-0.0313881	0.599663	0.810209	282	-0.149575	0.0340651	0.589913	201	-0.203863	0.000140441	0.0189766	344
APEX2_27301	0.00738553	0.91507	0.999491	211	0.0160191	0.741641	0.964906	426	-0.0614171	0.406264	0.791943	185	-0.120638	0.0404189	0.218982	289	-0.119572	0.251006	0.820606	94	-0.0919882	0.261284	0.603754	151
APH1A_51107	-0.00667378	0.923229	0.999491	211	-0.00180795	0.970321	0.997607	426	0.0193217	0.797395	0.94896	179	0.0762157	0.201937	0.49159	282	0.131962	0.17544	0.775493	107	0.0394123	0.586313	0.832021	193
APH1B_83464	-0.0133383	0.847266	0.999491	211	0.0259733	0.592928	0.939141	426	0.100376	0.181252	0.621713	179	0.17668	0.00290852	0.0612017	282	0.075376	0.44033	0.893902	107	-0.0667055	0.35668	0.68328	193
API5_8539	-0.0602593	0.383804	0.999491	211	0.063655	0.189758	0.791312	426									-0.0700899	0.322803	0.856403	201	-0.0248871	0.645532	0.860202	344
APIP_51074	0.0583835	0.398808	0.999491	211	0.0471294	0.331836	0.861766	426									0.0175892	0.857293	0.97998	107	-0.0258276	0.721439	0.893136	193
APLF_200558	-0.0196335	0.776774	0.999491	211	0.0556521	0.251729	0.825832	426									-0.196072	0.0429648	0.606457	107	-0.118556	0.100562	0.402031	193
APLNR_187	-0.0480581	0.48747	0.999491	211	0.1018	0.035692	0.597695	426	-0.0152455	0.839484	0.961693	179	-0.0669132	0.262744	0.559086	282	-0.015346	0.828814	0.976513	201	-0.0501262	0.353977	0.681602	344
APLN_8862	-0.0387496	0.575659	0.999491	211	-0.0167339	0.73055	0.964022	426									-0.0269531	0.78287	0.970763	107	0.122854	0.0887352	0.379372	193
APLP1_333	-0.0780004	0.259315	0.999491	211	-0.114167	0.0184153	0.508453	426									0.0560103	0.429674	0.891226	201	0.157441	0.00341422	0.0861598	344
APLP2_334	0.0930877	0.177957	0.999491	211	0.0804163	0.097402	0.704508	426									0.00141502	0.984094	0.99785	201	0.00970902	0.857604	0.949309	344
APMAP_57136	-0.0758306	0.272843	0.999491	211	0.0311762	0.521046	0.922355	426	-0.0542308	0.463462	0.823062	185	-0.0603209	0.306808	0.601087	289
APOA1_335	0.0200849	0.771781	0.999491	211	0.0220219	0.650371	0.951225	426									-0.0854176	0.22795	0.80532	201	-0.163093	0.00241126	0.0751513	344
APOA2_336	-0.0233835	0.735594	0.999491	211	0.0272835	0.574405	0.93474	426	0.0101073	0.893481	0.977034	178	0.0940933	0.114893	0.374753	282	0.164274	0.0197895	0.528391	201	0.175058	0.0011132	0.055105	344
APOA4_337	0.0759679	0.271973	0.999491	211	0.0377935	0.436549	0.894279	426									0.123939	0.0796117	0.666253	201	-0.0021921	0.967687	0.989565	344
APOA5_116519	0.092255	0.181886	0.999491	211	0.0793442	0.101962	0.710902	426									0.0586386	0.408309	0.884604	201	-0.0115595	0.830841	0.938625	344
APOBEC1_339	-0.0892672	0.197587	0.999491	210	-0.018852	0.700064	0.959327	420									0.0182895	0.796636	0.972056	201	-0.0272319	0.614731	0.844594	344
APOBEC2_10930	0.130799	0.0578499	0.983399	211	0.0197913	0.683768	0.956003	426									0.0215306	0.7616	0.967959	201	0.057837	0.284751	0.625793	344
APOBEC3A_200315	0.10166	0.141092	0.999491	211	0.0847777	0.080499	0.683167	426									-0.0492849	0.487182	0.911901	201	-0.0298097	0.581635	0.829107	344
APOBEC3A_B_100913187																	0.0490455	0.489302	0.912857	201	0.0368938	0.495227	0.777213	344
APOBEC3B_9582	-0.107359	0.120014	0.999491	211	0.0104163	0.830263	0.978691	426									0.0233012	0.811702	0.974866	107	0.093294	0.196884	0.542677	193
APOBEC3C_27350	-0.00183727	0.978835	0.999491	211	0.0201865	0.677803	0.955056	426									-0.000895515	0.989933	0.998413	201	-0.00610802	0.910129	0.967604	344
APOBEC3D_140564	0.0503302	0.4671	0.999491	211	-0.0488932	0.31404	0.851691	426									0.163154	0.093128	0.681865	107	0.0466969	0.51901	0.792065	193
APOBEC3F_200316	0.0514421	0.457304	0.999491	211	0.0394861	0.416272	0.886001	426									-0.0931228	0.188554	0.782928	201	-0.0746914	0.166908	0.503773	344
APOBEC3G_60489	0.0203321	0.769051	0.999491	211	-0.0139119	0.774642	0.97038	426									0.0540496	0.446023	0.894922	201	0.0733994	0.174389	0.513209	344
APOBEC3H_164668	0.0759721	0.271946	0.999491	211	0.00057764	0.990516	0.999923	426									0.0442591	0.53271	0.924784	201	0.00683494	0.899487	0.964552	344
APOBEC4_403314	0.125524	0.0688016	0.987144	211	0.0661279	0.173089	0.781867	426									0.0262668	0.788268	0.971804	107	0.00249144	0.972568	0.991052	193
APOBR_55911	-0.114254	0.097885	0.999491	211	-0.01725	0.722577	0.962843	426									-0.00225877	0.974613	0.99606	201	-0.03868	0.474569	0.766356	344
APOB_338	0.0194269	0.779061	0.999491	211	-0.0335003	0.490446	0.914152	426	0.0158962	0.832731	0.960103	179	-0.0851632	0.15376	0.431622	282	0.0625174	0.377955	0.87147	201	0.0943142	0.0806725	0.362183	344
APOC1_341	-0.0306614	0.65788	0.999491	211	-0.0692715	0.153505	0.767693	426									0.108233	0.267135	0.830137	107	0.170462	0.0177821	0.18097	193
APOC2_344	-0.0228905	0.740968	0.999491	211	-0.0394431	0.41678	0.886001	426									-0.0105687	0.881627	0.983757	201	-0.065945	0.222475	0.565783	344
APOC3_345	-0.0794672	0.250437	0.999491	211	0.032423	0.504509	0.919083	426									-0.0170426	0.810228	0.974866	201	-0.0401635	0.457778	0.757284	344
APOC4-APOC2_100533990																	-0.043304	0.541599	0.925568	201	-0.0543762	0.314608	0.649462	344
APOC4_346	-0.243105	0.000365334	0.574216	211	-0.0807869	0.0958637	0.703317	426									-0.0404136	0.679386	0.953169	107	0.0337703	0.641045	0.858818	193
APOD_347	0.0621628	0.368934	0.999491	211	0.0250559	0.606058	0.941539	426	0.263064	0.000374025	0.0999181	179	0.188795	0.00144747	0.0440593	282	-0.192581	0.00616319	0.421727	201	-0.17839	0.000889592	0.0508771	344
APOE_348	-0.0349676	0.613509	0.999491	211	-0.0545399	0.261344	0.831694	426									-0.000138176	0.998447	0.999827	201	-0.0660514	0.221728	0.564941	344
APOF_319	-0.0447241	0.518202	0.999491	211	-0.0365874	0.451336	0.899742	426									-0.129166	0.184848	0.782928	107	-0.172634	0.0163599	0.174482	193
APOH_350	-0.0485134	0.48335	0.999491	211	0.0136127	0.779362	0.970421	426	0.0585788	0.427076	0.803589	186	-0.0144912	0.805565	0.921453	291	0.000467717	0.994742	0.999549	201	0.000463692	0.993163	0.997494	344
APOL1_8542	0.133856	0.0521895	0.983399	211	0.0276591	0.569147	0.933223	426									0.108104	0.267711	0.830137	107	0.0302102	0.676633	0.873967	193
APOL2_23780	0.0837247	0.225867	0.999491	211	0.00335204	0.945004	0.993307	426									-0.0733236	0.300925	0.845264	201	-0.0178159	0.74196	0.902537	344
APOL3_80833	0.0779675	0.259517	0.999491	211	0.0508676	0.294874	0.847156	426									0.0610803	0.531983	0.924311	107	0.143871	0.0459193	0.277554	193
APOL4_80832																	0.188099	0.00749436	0.444075	201	0.156979	0.00351109	0.0865873	344
APOL5_80831	0.0941576	0.173002	0.999491	211	-0.058062	0.231746	0.819057	426									-0.059757	0.540923	0.925568	107	-0.0762108	0.292153	0.631535	193
APOL6_80830	0.0681343	0.324637	0.999491	211	-0.0137371	0.777398	0.97038	426									0.181844	0.0608514	0.637422	107	0.0680433	0.347096	0.675681	193
APOLD1_81575	-0.0239187	0.729775	0.999491	211	-0.0289912	0.550682	0.926007	426									-0.0257602	0.716608	0.958617	201	-0.0960708	0.0751612	0.350397	344
APOM_55937	0.130275	0.0588691	0.983399	211	0.052598	0.278733	0.841167	426									0.143088	0.0427231	0.606457	201	0.090886	0.0923687	0.387837	344
APOOL_139322	-0.0318829	0.645163	0.999491	211	-0.0374023	0.441314	0.895506	426									-0.0731268	0.45413	0.897972	107	-0.112122	0.12056	0.435143	193
APOO_79135	0.125345	0.0692029	0.987144	211	0.02159	0.656786	0.952206	426									0.0171617	0.808927	0.974377	201	0.0402553	0.45675	0.757284	344
APOPT1_84334	0.0608856	0.378872	0.999491	211	0.0598057	0.218005	0.806631	426									0.0681295	0.485634	0.911404	107	0.123555	0.0869164	0.375174	193
APPBP2_10513	-0.0476901	0.490814	0.999491	211	0.0452604	0.35139	0.868544	426	0.17556	0.0190785	0.307997	178	0.128362	0.0311682	0.192005	282	0.0474783	0.503304	0.917219	201	0.0417394	0.440311	0.745913	344
APPL1_26060	0.0907037	0.190441	0.999491	210	0.0365461	0.45507	0.901533	420									-0.115676	0.101995	0.692153	201	-0.115778	0.0318122	0.234881	344
APPL2_55198	0.147251	0.0329429	0.98243	210	0.0736474	0.131844	0.748248	420									-0.0743349	0.446688	0.894922	107	0.0206605	0.775498	0.914711	193
APP_351	-0.0417277	0.546647	0.999491	211	-0.0601959	0.215011	0.804004	426									-0.0403107	0.579802	0.933029	191	-0.160759	0.00335926	0.0861598	331
APRT_353	0.0167234	0.809172	0.999491	211	-0.0380687	0.433213	0.892302	426	-0.0684261	0.35472	0.760864	185	-0.0308194	0.601822	0.810863	289	-0.0326555	0.645367	0.946989	201	-0.00210709	0.968939	0.989872	344
APTX_54840	-0.113717	0.0994804	0.999491	211	0.0742258	0.126113	0.743064	426	-0.00448603	0.95261	0.989201	178	0.0310255	0.603887	0.811696	282	0.0573787	0.418471	0.888233	201	-0.0234425	0.664818	0.868994	344
AQP10_89872	-0.0159879	0.817413	0.999491	211	0.0138402	0.775773	0.97038	426									-0.0590792	0.40479	0.883402	201	-0.0636226	0.239227	0.581159	344
AQP11_282679	0.0137457	0.842661	0.999491	211	0.0367623	0.449175	0.899173	426	-0.0777505	0.292824	0.718324	185	-0.0796456	0.176935	0.465235	289	-0.0340837	0.630982	0.944106	201	0.00793225	0.883457	0.958307	344
AQP12A_375318																	-0.0746219	0.292424	0.842247	201	-0.0470437	0.38439	0.704876	344
AQP12B_653437	0.0668437	0.333907	0.999491	211	0.00432952	0.929004	0.990788	426									0.0781812	0.269946	0.831883	201	-0.0355803	0.510717	0.786763	344
AQP1_358	-0.0201039	0.771571	0.999491	211	-0.0292352	0.547331	0.924786	426									0.0547624	0.440038	0.893894	201	-0.017457	0.746979	0.904552	344
AQP2_359	-0.0807456	0.242872	0.999491	211	-0.0165155	0.733933	0.964401	426									-0.0111051	0.875666	0.98291	201	-0.0233346	0.666268	0.869644	344
AQP3_360	-0.0342515	0.620797	0.999491	211	0.138107	0.00429265	0.357882	426									5.53145e-05	0.999394	0.999827	191	-0.0488272	0.375886	0.698757	331
AQP4_361	0.0708714	0.305533	0.999491	211	0.0862367	0.0754057	0.679059	426	-0.0990558	0.179767	0.621531	185	-0.105725	0.0727232	0.29562	289	0.0365445	0.60652	0.939075	201	-0.10025	0.0632716	0.321525	344
AQP5_362	-0.0669352	0.333244	0.999491	211	-0.0514669	0.289215	0.846719	426									0.0163839	0.817433	0.975751	201	0.0531744	0.325438	0.65854	344
AQP6_363	0.0342513	0.620799	0.999491	211	0.0178608	0.713179	0.962171	426									0.0221606	0.754843	0.966559	201	-0.00916973	0.865437	0.952349	344
AQP7_364	0.0214951	0.756245	0.999491	211	0.0782916	0.106603	0.716377	426									0.0380384	0.591877	0.934864	201	0.0837634	0.120985	0.435883	344
AQP8_343	-0.130749	0.0579454	0.983399	211	-0.122997	0.0110593	0.457901	426									0.0786882	0.266843	0.830137	201	0.0919805	0.0884955	0.37854	344
AQP9_366	0.0598617	0.386955	0.999491	211	0.0575586	0.235824	0.822159	426									-0.182172	0.0603789	0.637407	107	-0.155593	0.0307182	0.232064	193
AQR_9716	-0.0805403	0.244076	0.999491	211	-0.118406	0.0144733	0.491575	426									0.0452284	0.523766	0.921731	201	-0.0727667	0.178143	0.517506	344
ARAF_369	0.0290054	0.67528	0.999491	211	0.0427823	0.378412	0.877028	426	-0.0857901	0.253513	0.691694	179	-0.0726139	0.224144	0.517348	282	-0.0684353	0.334385	0.858398	201	-0.0196549	0.716416	0.891	344
ARAP1_116985	0.107486	0.119575	0.999491	211	0.0951112	0.049791	0.641652	426	0.0551912	0.464344	0.823286	178	0.102964	0.0843543	0.321571	282	0.00937585	0.894906	0.984775	201	0.0440533	0.415365	0.726759	344
ARAP2_116984	0.13324	0.053292	0.983399	211	0.0048393	0.920671	0.990242	426	-0.165715	0.0270606	0.341469	178	-0.160613	0.00687693	0.0963116	282	0.0765288	0.43335	0.891713	107	0.0164454	0.820425	0.934907	193
ARAP3_64411	-0.013214	0.848672	0.999491	211	-0.0390092	0.421927	0.887608	426	-0.0572683	0.446385	0.81437	179	-0.0855357	0.151962	0.428232	282	0.0202596	0.775287	0.969689	201	-0.0188374	0.727735	0.895829	344
ARCN1_372	0.0437489	0.527376	0.999491	211	0.014303	0.768485	0.969047	426									0.0838199	0.2368	0.813696	201	0.0442799	0.412968	0.724849	344
ARC_23237	0.032485	0.638932	0.999491	211	0.0541938	0.264387	0.832753	426									0.0847691	0.385327	0.876341	107	0.0257911	0.721816	0.893537	193
AREG_374	0.036149	0.601569	0.999491	211	0.0332924	0.493142	0.915178	426									-0.0128718	0.89531	0.984959	107	0.112344	0.119821	0.434646	193
AREL1_9870	-0.0254479	0.713235	0.999491	211	0.0176762	0.716016	0.962539	426	0.0370731	0.622226	0.884917	179	0.0312444	0.600038	0.810381	284	0.0779007	0.271674	0.831941	201	0.0957461	0.076156	0.352679	344
ARF1_375	-0.0349154	0.614039	0.999491	211	0.00115944	0.980964	0.999218	426	-0.12257	0.103119	0.52918	178	-0.00578936	0.922894	0.969963	282	0.174673	0.0131356	0.497589	201	0.118053	0.0285782	0.224361	344
ARF3_377	-0.0189704	0.784124	0.999491	211	0.0116532	0.810469	0.976868	426	-0.0799161	0.288963	0.716752	178	0.0654514	0.273338	0.57174	282	0.102975	0.145755	0.738396	201	0.0468852	0.385996	0.706719	344
ARF4_378	-0.165294	0.0162467	0.98243	211	-0.0617461	0.203411	0.800384	426	-0.0171226	0.82054	0.954641	178	-0.00206893	0.972407	0.991175	282	-0.0073221	0.917834	0.989814	201	0.0244729	0.651038	0.862484	344
ARF5_381	-0.0729082	0.291807	0.999491	211	-0.0154406	0.750658	0.965379	426	-0.0619552	0.40087	0.787926	186	-0.121891	0.0376996	0.212197	291	-0.0952999	0.178384	0.779922	201	-0.0947481	0.0792817	0.35892	344
ARF6_382	-0.0252324	0.715557	0.999491	211	-0.0655474	0.1769	0.783037	426	-0.0361061	0.63231	0.887886	178	-0.0395605	0.508201	0.755011	282	-0.0620801	0.381306	0.872896	201	-0.0985606	0.0678773	0.332539	344
ARFGAP1_55738	-0.0172542	0.803236	0.999491	211	0.00175822	0.971137	0.997699	426	-0.0204272	0.786667	0.945525	178	-0.0515834	0.38816	0.667294	282	0.0878821	0.214763	0.798214	201	0.133212	0.0134077	0.157764	344
ARFGAP2_84364	-0.0165227	0.811419	0.999491	211	-0.0231702	0.633444	0.947857	426	0.067198	0.372809	0.770845	178	0.0392413	0.511632	0.756371	282
ARFGAP3_26286	-0.0309948	0.6544	0.999491	211	0.0113807	0.814821	0.977154	426	-0.12297	0.101019	0.525865	179	-0.186298	0.00167726	0.046814	282	-0.191216	0.00654425	0.421727	201	-0.0698315	0.196341	0.542677	344
ARFGEF1_10565	-0.0180501	0.794357	0.999491	211	0.0592641	0.222209	0.810536	426									0.0399594	0.573289	0.932477	201	0.00965092	0.858448	0.949392	344
ARFGEF2_10564	-0.0795959	0.249668	0.999491	211	-0.0416018	0.391722	0.880404	426									-0.0355037	0.616814	0.941326	201	-0.0333529	0.537549	0.804379	344
ARFGEF3_57221	-0.116135	0.0924454	0.999491	211	-0.0420763	0.386338	0.878599	426									0.0321116	0.742649	0.96423	107	0.096566	0.181567	0.522284	193
ARFIP1_27236	0.00369705	0.957426	0.999491	211	0.138445	0.0041981	0.355058	426									0.00346149	0.961103	0.993331	201	-0.225837	2.35622e-05	0.00992154	344
ARFIP2_23647	-0.0765966	0.268013	0.999491	211	-0.0388779	0.423493	0.888664	426									0.0734143	0.300326	0.845264	201	0.114955	0.0330557	0.238728	344
ARFRP1_10139	-0.0641696	0.353648	0.999491	211	-0.0518559	0.285581	0.845358	426	0.0259849	0.729887	0.928122	179	-0.028311	0.635924	0.832074	282	0.0147739	0.835103	0.977472	201	-0.048546	0.369374	0.693741	344
ARG1_383	0.0155049	0.822837	0.999491	211	0.0514605	0.289275	0.846719	426	0.0713891	0.342294	0.754341	179	0.0903239	0.130241	0.399529	282	0.0288068	0.684784	0.953985	201	0.0628934	0.244665	0.587757	344
ARG2_384	0.0259767	0.707545	0.999491	211	-0.0175908	0.717328	0.962684	426	0.0352106	0.639834	0.891089	179	-0.0306625	0.608131	0.814142	282	0.161167	0.0222746	0.538239	201	0.00959234	0.859298	0.949831	344
ARGFX_503582	-0.0123388	0.858586	0.999491	211	0.00896558	0.853615	0.983384	426									-0.116897	0.230486	0.807737	107	-0.183364	0.0106951	0.142805	193
ARGLU1_55082	-0.00909505	0.895513	0.999491	211	-0.0678382	0.162215	0.774357	426									0.028447	0.771158	0.969228	107	0.053333	0.461343	0.759313	193
ARHGAP10_79658	-0.0910129	0.187865	0.999491	211	-0.0383986	0.429235	0.891337	426	-0.107354	0.153777	0.595616	178	-0.155395	0.00895323	0.108514	282	0.0529054	0.455723	0.898318	201	0.027941	0.605546	0.841426	344
ARHGAP11A_9824	-0.0391654	0.571566	0.999491	211	-0.0105457	0.828187	0.978505	426	0.0318602	0.672893	0.903725	178	0.0309551	0.60471	0.811742	282	-0.00612471	0.931234	0.990322	201	0.0275587	0.61049	0.842885	344
ARHGAP11B_89839	-0.0976681	0.15746	0.999491	211	-0.0034192	0.943904	0.993182	426	0.0552578	0.463805	0.823062	178	0.00410843	0.945239	0.980654	282
ARHGAP12_94134	0.132632	0.0543979	0.983399	211	0.103053	0.0334696	0.587187	426	0.141043	0.060397	0.444342	178	0.118237	0.0472905	0.237281	282	-0.030445	0.667894	0.95166	201	0.0429879	0.426746	0.736264	344
ARHGAP15_55843	0.0810992	0.240808	0.999491	211	0.00100961	0.983424	0.999574	426	-0.0146601	0.846002	0.963033	178	-0.116714	0.0502359	0.243756	282	-0.00477718	0.946338	0.991427	201	-0.0279805	0.605035	0.841205	344
ARHGAP17_55114	-0.0807462	0.242869	0.999491	211	-0.0535119	0.270454	0.837141	426	0.125059	0.0889882	0.499775	186	0.133538	0.0227034	0.163146	291	0.00674172	0.924326	0.989814	201	0.0586485	0.278036	0.619068	344
ARHGAP18_93663	-0.040462	0.558889	0.999491	211	-0.000680776	0.988822	0.999871	426	0.144216	0.0501714	0.41985	185	0.0317687	0.590672	0.805189	289	-0.0763698	0.281234	0.835562	201	-0.0539928	0.318036	0.652467	344
ARHGAP19-SLIT1_100533184									-0.0559534	0.456911	0.819213	179	-0.13833	0.0201351	0.153849	282	-0.0558461	0.431029	0.891713	201	-0.171384	0.00141893	0.0606486	344
ARHGAP19_84986	0.0175597	0.799825	0.999491	211	0.00196323	0.967773	0.996973	426	0.0145668	0.846539	0.963033	179	0.150511	0.0113829	0.120378	282	0.0355979	0.61588	0.94118	201	-0.0328392	0.543835	0.80772	344
ARHGAP1_392	-0.0415163	0.548682	0.999491	211	0.0248623	0.608844	0.941539	426	-0.0754281	0.31561	0.738513	179	-0.0763189	0.201325	0.491462	282	-0.0329694	0.642194	0.946856	201	0.0396304	0.463774	0.760768	344
ARHGAP20_57569	0.0377401	0.585655	0.999491	211	0.0443954	0.360681	0.870304	426	-0.0575525	0.445422	0.814232	178	-0.00798	0.893866	0.957757	282	0.000128163	0.998559	0.999827	201	0.0161783	0.764948	0.910991	344
ARHGAP21_57584	0.0757228	0.273527	0.999491	211	0.0863762	0.0749325	0.678473	426	-0.0321679	0.669035	0.901732	179	0.0338238	0.57164	0.795508	282	0.0100743	0.917972	0.989814	107	0.0210257	0.771638	0.913117	193
ARHGAP22_58504	0.0542389	0.43318	0.999491	211	-0.0480833	0.322132	0.85708	426	-0.0688389	0.361222	0.763517	178	-0.0511964	0.391734	0.670547	282	-0.145463	0.0393598	0.60281	201	-0.147767	0.00603657	0.113064	344
ARHGAP23_57636	0.0677389	0.327459	0.999491	211	-0.00638144	0.895518	0.988146	426	-0.0450429	0.550496	0.861465	178	-0.0012314	0.983575	0.99484	282	0.0424833	0.549293	0.925568	201	-0.0184721	0.732811	0.897898	344
ARHGAP24_83478	0.0853938	0.216717	0.999491	211	0.0178641	0.713129	0.962171	426	0.00788218	0.916834	0.981313	178	0.0032803	0.956265	0.984937	282	0.150368	0.0331164	0.587166	201	0.110095	0.041277	0.263164	344
ARHGAP25_9938	0.130299	0.0588213	0.983399	211	0.0945492	0.0511629	0.645557	426	-0.246619	0.000874786	0.116598	179	-0.252695	1.75068e-05	0.00558467	282	0.034572	0.626094	0.943551	201	-0.0359598	0.506215	0.78381	344
ARHGAP26_23092	-0.0272554	0.693855	0.999491	211	0.0253905	0.601254	0.939384	426	0.0826376	0.27144	0.699882	179	0.0480466	0.421559	0.69174	282	0.115406	0.102803	0.693423	201	0.117672	0.0291001	0.226567	344
ARHGAP27P1-BPTFP1-KPNA2P3_109286553									-0.182667	0.0125784	0.271732	186	-0.0286751	0.626149	0.827132	291
ARHGAP27_201176	-0.0232931	0.736578	0.999491	211	-0.0476952	0.326059	0.858547	426	-0.0960726	0.202065	0.645586	178	0.0691768	0.246903	0.540119	282	-0.00553701	0.937819	0.990913	201	-0.00989084	0.854967	0.948411	344
ARHGAP28_79822	0.0940207	0.17363	0.999491	211	0.0830094	0.0870414	0.695797	426									-0.07877	0.419962	0.888233	107	-0.00545526	0.93998	0.979342	193
ARHGAP29_9411	0.0101157	0.883866	0.999491	211	0.0392425	0.419156	0.887284	426	0.0186519	0.804819	0.95022	178	0.017036	0.775772	0.905958	282	0.125645	0.0755236	0.665116	201	0.0614756	0.255484	0.597521	344
ARHGAP30_257106	-0.107713	0.118792	0.999491	211	-0.0288568	0.552531	0.926715	426	0.108622	0.148946	0.588041	178	0.163672	0.00587083	0.0872945	282
ARHGAP31_57514	0.0991602	0.151182	0.999491	211	0.0314581	0.517282	0.922024	426	-0.0379817	0.614718	0.88414	178	-0.111953	0.0604404	0.269281	282	-0.052135	0.46232	0.89979	201	-0.0177832	0.742417	0.902962	344
ARHGAP32_9743	0.0566009	0.413387	0.999491	211	0.046342	0.339988	0.866463	426									0.0172987	0.807433	0.974186	201	-0.00735033	0.891953	0.961391	344
ARHGAP33_115703	-0.140872	0.0409206	0.98243	211	-0.125824	0.00933108	0.434889	426	-0.0660133	0.381314	0.775549	178	-0.117667	0.0483757	0.240072	282	0.12066	0.215721	0.798417	107	0.139094	0.0537064	0.29912	193
ARHGAP35_2909	0.100727	0.145761	0.999491	210	0.0134511	0.783427	0.971988	420	-0.0790358	0.292954	0.718421	179	-0.0595547	0.31899	0.610434	282	0.0973284	0.169278	0.766135	201	-0.0218595	0.686209	0.879008	344
ARHGAP36_158763	-0.0126857	0.854654	0.999491	211	0.0049288	0.919208	0.990242	426	0.0355769	0.637312	0.890571	178	-0.0323631	0.588372	0.803883	282	-0.0156975	0.872504	0.982497	107	-0.00457148	0.949689	0.982887	193
ARHGAP39_80728	-0.0434446	0.530255	0.999491	211	0.0158198	0.744744	0.965043	426	0.0410445	0.585395	0.875732	179	0.0311107	0.602894	0.811354	282	0.134174	0.0575679	0.631906	201	0.101382	0.0603316	0.316027	344
ARHGAP40_343578																	-0.0369601	0.602429	0.93764	201	-0.0706651	0.191041	0.535659	344
ARHGAP42&TMEM133_143872&83935																	-0.213919	0.0269331	0.557805	107	-0.175698	0.0145228	0.164396	193
ARHGAP42_143872									0.161719	0.0305606	0.356761	179	0.10848	0.0689161	0.288166	282
ARHGAP44_9912	0.0622216	0.36848	0.999491	211	0.0360732	0.457726	0.902523	426	-0.165507	0.0272563	0.342853	178	-0.0791719	0.184939	0.47348	282	0.115144	0.237601	0.814497	107	0.0744811	0.303276	0.641821	193
ARHGAP45_23526	0.061871	0.37119	0.999491	211	0.0122075	0.801637	0.974983	426	-0.0988491	0.188016	0.630946	179	-0.0717653	0.229619	0.522605	282	0.0423506	0.550543	0.925568	201	0.00259465	0.961757	0.98789	344
ARHGAP4_393	0.0363716	0.59933	0.999491	211	-0.029891	0.538378	0.924199	426	-0.101178	0.177774	0.618871	179	-0.0484498	0.417669	0.690343	282	-0.0895033	0.206391	0.794103	201	-0.103665	0.0547462	0.30114	344
ARHGAP5_394	0.106417	0.12332	0.999491	211	0.114714	0.0178587	0.502974	426	0.128187	0.0872533	0.498209	179	0.11386	0.0561638	0.258308	282	0.0527031	0.45745	0.898539	201	-0.0650624	0.22874	0.571533	344
ARHGAP6_395	-0.0290511	0.674797	0.999491	211	0.0548869	0.258318	0.828694	426	-0.0832578	0.269207	0.699319	178	-0.0562526	0.346607	0.63428	282	-0.045335	0.522788	0.921178	201	0.0283039	0.600868	0.839027	344
ARHGAP8_23779	0.0439894	0.525106	0.999491	211	-0.0274541	0.572014	0.93411	426	-0.0332429	0.655955	0.896452	182	-0.0725125	0.221504	0.514414	286	-0.20103	0.0378673	0.602125	107	-0.193894	0.0068953	0.119597	193
ARHGAP9_64333	-0.0221902	0.748622	0.999491	211	0.0084023	0.862718	0.984977	426									-0.094238	0.183293	0.782538	201	-0.085316	0.114222	0.425286	344
ARHGDIA_396	0.15587	0.02354	0.98243	211	0.137361	0.00450783	0.364631	426									0.0660313	0.351681	0.861563	201	-0.00886226	0.869908	0.954131	344
ARHGDIB_397	0.149843	0.0295576	0.98243	211	0.0577127	0.234571	0.822159	426									-0.010038	0.887531	0.984775	201	0.00716474	0.894665	0.962694	344
ARHGDIG_398	-0.0164383	0.812364	0.999491	211	0.040801	0.400909	0.884322	426									-0.0523433	0.460531	0.899534	201	-0.0167127	0.757423	0.908605	344
ARHGEF10L_55160	0.096142	0.164082	0.999491	211	0.11254	0.0201602	0.529106	426	-0.139759	0.0620538	0.44745	179	-0.0654143	0.2719	0.570033	284	-0.128293	0.187861	0.782928	107	-0.0125255	0.86274	0.951627	193
ARHGEF10_9639	-0.0134761	0.845707	0.999491	211	-0.0390174	0.42183	0.887608	426	0.120609	0.107789	0.532203	179	0.0859374	0.14859	0.424277	284	0.096159	0.174484	0.773818	201	0.0555376	0.304367	0.642438	344
ARHGEF11_9826	-0.00569181	0.934497	0.999491	211	0.0221234	0.648868	0.951047	426	-0.116798	0.113357	0.540346	185	-0.132287	0.0245106	0.170272	289	-0.125958	0.0747939	0.665116	201	-0.127616	0.0178848	0.181172	344
ARHGEF12_23365	-0.00533903	0.938549	0.999491	211	-0.0631579	0.193247	0.794085	426	0.0145987	0.846208	0.963033	179	-0.0305926	0.60767	0.814078	284	-0.0756298	0.285936	0.839109	201	-0.0196683	0.716231	0.890899	344
ARHGEF15_22899	0.0125952	0.85568	0.999491	211	-0.0525391	0.279272	0.841187	426	-0.121446	0.105349	0.52918	179	-0.108903	0.0668576	0.284037	284	-0.0392531	0.580092	0.933029	201	-0.127148	0.018312	0.183066	344
ARHGEF16_27237	0.089225	0.196723	0.999491	211	0.030128	0.53516	0.923421	426	-0.0346752	0.644934	0.893874	179	-0.0531003	0.372637	0.654932	284	0.0526755	0.457686	0.898586	201	0.099106	0.0663616	0.328422	344
ARHGEF17_9828	0.0758394	0.272787	0.999491	211	0.0174014	0.720244	0.962684	426	-0.018177	0.809161	0.950967	179	-0.0612634	0.303554	0.598922	284	-0.113721	0.107958	0.700387	201	-0.174605	0.00114732	0.055732	344
ARHGEF18_23370	-0.154821	0.0245048	0.98243	211	-0.113419	0.0191996	0.517675	426	-0.126944	0.0850897	0.493025	185	-0.0221899	0.707185	0.874463	289	0.107492	0.128799	0.723683	201	0.091571	0.0899292	0.38245	344
ARHGEF19_128272	-0.123599	0.0731993	0.987144	211	-0.0315377	0.516223	0.921952	426	-0.121684	0.104663	0.52918	179	-0.152205	0.010209	0.115615	284	0.047362	0.504351	0.917827	201	0.0126197	0.815592	0.932329	344
ARHGEF1_9138	0.054077	0.434555	0.999491	211	-0.100402	0.038319	0.603518	426	0.00315498	0.966566	0.993218	179	-0.0797924	0.179955	0.469352	284	0.140165	0.0471892	0.607858	201	0.092366	0.0871629	0.375585	344
ARHGEF25_115557	0.00623856	0.928221	0.999491	211	0.0864762	0.0745952	0.678074	426	0.0680131	0.365663	0.765382	179	0.0399799	0.502189	0.750132	284	-0.0570454	0.421183	0.88867	201	-0.0768559	0.154916	0.48819	344
ARHGEF26_26084	0.0199118	0.773695	0.999491	211	0.00214678	0.964762	0.996609	426	-0.0646223	0.390104	0.781089	179	-0.0664307	0.264505	0.561044	284	0.0398702	0.574146	0.932477	201	-0.0762555	0.158175	0.493157	344
ARHGEF28_64283	0.0451292	0.514415	0.999491	211	-0.0215251	0.657752	0.952511	426	0.0281136	0.703271	0.914992	186	-0.0611906	0.298194	0.592774	291	-0.0875976	0.216257	0.798417	201	-0.0486714	0.368137	0.692194	344
ARHGEF2_9181	-0.0235043	0.734279	0.999491	211	0.0151735	0.754832	0.966249	426	0.0238588	0.746511	0.932602	186	0.045363	0.440766	0.706197	291	-0.175213	0.0128517	0.497298	201	-0.163345	0.00237365	0.0751513	344
ARHGEF33_100271715	-0.0732065	0.289832	0.999491	211	0.0257515	0.596091	0.939141	426	0.0444904	0.554277	0.86236	179	0.0126696	0.831656	0.933791	284	0.109394	0.262009	0.828491	107	0.0605353	0.402993	0.719156	193
ARHGEF34P_728377									-0.0501424	0.505041	0.843674	179	-0.0503949	0.397519	0.674083	284	0.111415	0.11534	0.702158	201	-0.0146376	0.786765	0.919959	344
ARHGEF35_445328	0.0155851	0.821936	0.999491	211	0.026168	0.590159	0.939141	426	0.128305	0.0869589	0.497131	179	0.0548048	0.357466	0.642504	284	-0.0226515	0.816859	0.975662	107	-0.066452	0.358515	0.684997	193
ARHGEF37_389337	0.0339697	0.623675	0.999491	211	0.0199104	0.681968	0.955743	426	0.0113258	0.880392	0.972286	179	0.0976542	0.100514	0.350734	284	0.0223565	0.819203	0.975794	107	-0.0561776	0.437756	0.744616	193
ARHGEF38_54848	0.122897	0.0748579	0.987144	211	0.0759838	0.117362	0.730494	426	0.00756635	0.919929	0.981313	179	-0.067209	0.258937	0.555113	284
ARHGEF39_84904	-0.0231246	0.738414	0.999491	211	-0.0426172	0.380256	0.877028	426	-0.0235544	0.754302	0.933803	179	-0.132349	0.0257235	0.173264	284	-0.035313	0.718023	0.958617	107	-0.0523657	0.469521	0.763103	193
ARHGEF3_50650	0.0416903	0.547007	0.999491	211	0.0376875	0.437836	0.894974	426	0.0122024	0.871212	0.970545	179	0.043748	0.462732	0.721464	284	0.0599453	0.397926	0.882671	201	0.0536181	0.321411	0.655186	344
ARHGEF40_55701	0.046268	0.503848	0.999491	211	-0.026086	0.591324	0.939141	426	-0.160599	0.0317472	0.362728	179	-0.113337	0.0564288	0.258929	284
ARHGEF4_50649	0.0736108	0.28717	0.999491	211	-0.0397365	0.41332	0.886001	426	-0.0375416	0.617829	0.884917	179	-0.0115597	0.846212	0.940167	284	-0.036576	0.606208	0.939075	201	-0.0193863	0.720128	0.892899	344
ARHGEF5_7984	-0.0370429	0.592604	0.999491	211	-0.0535082	0.270487	0.837141	426	-0.0987314	0.188544	0.631264	179	-0.0327583	0.582481	0.801187	284
ARHGEF6_9459	-0.0460553	0.505814	0.999491	211	-0.0448123	0.356184	0.868967	426	-0.0635133	0.398306	0.785516	179	-0.0489631	0.41108	0.686853	284	-0.134663	0.0566561	0.631906	201	-0.180772	0.000756033	0.0493193	344
ARHGEF7_8874	0.0555789	0.421885	0.999491	211	0.10218	0.0350061	0.594109	426	-0.00747926	0.920848	0.981313	179	-0.0184771	0.756535	0.898021	284	0.0554562	0.434258	0.891713	201	0.144072	0.00744205	0.122815	344
ARHGEF9_23229	0.125992	0.0677666	0.987144	211	0.0356811	0.462632	0.904971	426	-0.0780063	0.299306	0.725741	179	-0.0351622	0.555101	0.783838	284	-0.030306	0.669321	0.951857	201	-0.0251213	0.642427	0.859116	344
ARID1A_8289	0.116238	0.0929385	0.999491	210	0.0598812	0.22071	0.808591	420	-0.0568004	0.450115	0.815462	179	-0.0295979	0.6194	0.821779	284	0.195968	0.00530199	0.419815	201	0.110547	0.0404468	0.260348	344
ARID1B_57492	-3.02422e-05	0.999652	0.999972	210	-0.0152659	0.755083	0.966249	420	0.0114638	0.878946	0.972286	179	-0.0552262	0.353775	0.639908	284	0.0979346	0.166625	0.762625	201	0.0162662	0.763708	0.910657	344
ARID2_196528	-0.0168521	0.808184	0.999491	210	-0.0451783	0.355699	0.868967	420	-0.0836736	0.265456	0.69794	179	-0.174277	0.00321284	0.065197	284	-0.0793369	0.416614	0.886974	107	-0.00063992	0.992953	0.997494	193
ARID3A_1820	-0.00362958	0.958303	0.999491	210	0.0312177	0.523459	0.922355	420	-0.103619	0.167484	0.611857	179	-0.2496	2.08737e-05	0.00616548	284	0.110081	0.119787	0.706255	201	0.146229	0.00658977	0.117939	344
ARID3B_10620	-0.0814122	0.240121	0.999491	210	-0.0339832	0.487323	0.911715	420	-0.158989	0.0335227	0.372268	179	-0.226835	0.000115151	0.0123894	284	0.0686954	0.482008	0.90967	107	0.084891	0.240474	0.583004	193
ARID3C_138715	-0.0579348	0.40358	0.999491	210	-0.0007376	0.987975	0.999616	420	-0.130332	0.082047	0.48584	179	-0.0990617	0.0956826	0.342417	284	0.068805	0.481308	0.909144	107	0.0893368	0.216638	0.56041	193
ARID4A_5926	0.0178832	0.796695	0.999491	210	0.0202394	0.679174	0.955091	420	0.0300754	0.689412	0.908639	179	-0.0818946	0.168717	0.4538	284	-0.00619442	0.930454	0.990322	201	-0.0524221	0.33234	0.66361	344
ARID4B_51742	0.0605468	0.382679	0.999491	210	0.0414794	0.39649	0.88355	420	-0.0307823	0.682502	0.906974	179	-0.0118249	0.842728	0.937998	284	-0.0822757	0.399508	0.882712	107	-0.0300649	0.678101	0.875314	193
ARID5A_10865	-0.0897914	0.194957	0.999491	210	-0.0873246	0.0738236	0.677614	420	-0.0232108	0.753822	0.933803	185	-0.000227177	0.996932	0.998882	289	0.109994	0.259384	0.825979	107	0.128304	0.0753647	0.350955	193
ARID5B_84159	0.0440906	0.525149	0.999491	210	-0.0445376	0.362569	0.870304	420	-0.0232569	0.757307	0.934897	179	-0.0866935	0.145037	0.420149	284	0.0600786	0.538743	0.925568	107	0.121106	0.0934025	0.389487	193
ARIH1_25820	0.134972	0.0502414	0.983399	211	0.0615873	0.204578	0.800645	426									-0.00982884	0.889859	0.984775	201	0.111537	0.0386757	0.256016	344
ARIH2OS_646450	0.0306207	0.658306	0.999491	211	0.0524541	0.280052	0.841922	426
ARIH2_10425	-0.0207632	0.764297	0.999491	211	-0.00296093	0.951412	0.994386	426									0.125581	0.0756739	0.665116	201	0.142439	0.00815121	0.128238	344
ARL10_285598	-0.0249545	0.718557	0.999491	211	0.00705408	0.884578	0.987224	426	-0.110091	0.143493	0.579715	178	-0.0715642	0.23093	0.523358	282	0.0674607	0.489937	0.912857	107	0.15697	0.0292524	0.226595	193
ARL11_115761	0.0695862	0.314409	0.999491	211	0.016354	0.736438	0.964906	426	-0.0899774	0.232316	0.673158	178	-0.0999063	0.0940417	0.339358	282	-0.232855	0.0157932	0.506665	107	-0.0511014	0.48033	0.769842	193
ARL13A_392509	0.0184736	0.789644	0.999491	211	-0.00738402	0.879219	0.98639	426	-0.0832093	0.269487	0.699319	178	-0.131178	0.0276233	0.180127	282	-0.0924839	0.343406	0.859032	107	0.0295091	0.683729	0.877626	193
ARL13B_200894	-0.00534119	0.938524	0.999491	211	-0.0462349	0.341106	0.866778	426	0.131003	0.0813336	0.484357	178	0.14271	0.016478	0.140247	282	0.199244	0.00457339	0.411974	201	0.126327	0.0190842	0.185857	344
ARL14EPL_644100	-0.0128259	0.853066	0.999491	211	-0.069797	0.150401	0.764485	426
ARL14EP_120534	-0.0957818	0.165675	0.999491	211	0.0303163	0.53261	0.923126	426									0.0755797	0.439092	0.893894	107	0.115196	0.11065	0.418497	193
ARL14_80117	0.00785106	0.909739	0.999491	211	-0.0865136	0.0744692	0.678074	426	-0.0789307	0.294969	0.720264	178	-0.0817979	0.170744	0.457556	282	0.0059923	0.932717	0.990322	201	-0.0307629	0.569611	0.822874	344
ARL15_54622	-0.00221292	0.974509	0.999491	211	-0.0556811	0.251482	0.825832	426	0.196761	0.00847805	0.237237	178	0.167967	0.00468044	0.0795684	282	0.0440233	0.534898	0.925467	201	0.0635781	0.239557	0.581545	344
ARL16_339231	0.158664	0.0211296	0.98243	211	0.0535029	0.270535	0.837141	426	-0.085954	0.253952	0.691694	178	-0.152251	0.0104577	0.116807	282
ARL17A_51326									0.0797191	0.284726	0.713051	182	0.121798	0.0395471	0.216306	286
ARL17B&LOC100996709&LOC107984156&ARL17A_100506084&100996709&107984156&51326																	-0.0352863	0.718227	0.958617	107	0.126247	0.0802065	0.360671	193
ARL17B_100506084									-0.165931	0.0251784	0.337475	182	-0.140663	0.0173003	0.143402	286
ARL1_400	0.080864	0.24218	0.999491	211	0.00327461	0.946272	0.993329	426	-0.051494	0.493615	0.836575	179	-0.0465028	0.436648	0.70485	282	0.0493251	0.486826	0.911901	201	-0.013972	0.796244	0.924147	344
ARL2-SNX15_100528018									-0.119123	0.11223	0.540154	179	-0.0613341	0.304719	0.599441	282	-0.101205	0.152847	0.747068	201	-0.0372686	0.490853	0.774688	344
ARL2BP_23568	0.0232392	0.737774	0.999491	210	0.0778874	0.110963	0.724922	420									-0.175832	0.0700483	0.660156	107	-0.122763	0.0889739	0.379862	193
ARL2_402	-0.0482089	0.486103	0.999491	211	-0.0786148	0.105161	0.714752	426	0.104409	0.164253	0.607165	179	0.165624	0.0052997	0.0841934	282	0.0170516	0.81013	0.974866	201	-0.054775	0.311066	0.646719	344
ARL3_403	-0.0664141	0.33703	0.999491	211	0.0813793	0.093445	0.701914	426	-0.10373	0.159987	0.602921	185	-0.0442172	0.453977	0.715859	289	-0.0402157	0.57083	0.931896	201	0.0173704	0.748191	0.905123	344
ARL4A_10124	-0.0202475	0.769985	0.999491	211	0.0839282	0.0835906	0.687507	426	-0.12199	0.104772	0.52918	178	-0.108527	0.0687949	0.288151	282	-0.108198	0.126292	0.71998	201	-0.113615	0.0351696	0.245711	344
ARL4C_10123	0.0951495	0.168499	0.999491	211	0.0920345	0.0576936	0.650545	426	-0.0891254	0.226385	0.668428	186	-0.042816	0.466873	0.724584	291	0.0187586	0.791538	0.971804	201	-0.00605212	0.910948	0.967744	344
ARL4D_379	-0.0177237	0.797995	0.999491	211	0.0525622	0.27906	0.841187	426	-0.092719	0.217029	0.660614	179	0.10384	0.0817296	0.315638	282	-0.0630683	0.373758	0.870952	201	-0.149965	0.0053184	0.105331	344
ARL5A_26225	0.0541384	0.434034	0.999491	211	0.0381665	0.432032	0.891931	426	-0.0663159	0.379131	0.775157	178	-0.043794	0.463856	0.722652	282	-0.0921418	0.345202	0.859032	107	-0.133788	0.0636089	0.32179	193
ARL5B_221079	0.0303142	0.661514	0.999491	211	0.0892303	0.065775	0.666528	426	-0.0454812	0.54548	0.860063	179	-0.0491024	0.411417	0.686853	282	0.035793	0.613945	0.94047	201	0.114912	0.0331216	0.238892	344
ARL5C_390790	0.122273	0.0763575	0.987144	211	0.138391	0.00421312	0.355058	426	0.0728911	0.333582	0.750516	178	-0.0506305	0.396997	0.673713	282	0.054683	0.575875	0.93261	107	-0.115769	0.108875	0.415469	193
ARL6IP1_23204	0.00425446	0.951015	0.999491	211	-0.0519502	0.284704	0.844555	426									0.123763	0.204062	0.790844	107	-0.0826444	0.253192	0.595798	193
ARL6IP4_51329	-0.031743	0.646614	0.999491	211	-0.0460585	0.342953	0.867754	426									-0.0707048	0.469255	0.902992	107	-0.00952648	0.895388	0.962965	193
ARL6IP5_10550	-0.0674913	0.329235	0.999491	211	-0.0819257	0.091258	0.699746	426									-0.00346562	0.961057	0.993331	201	0.00116149	0.982876	0.993969	344
ARL6IP6_151188	-0.0966377	0.161909	0.999491	211	-0.00755399	0.876461	0.98639	426
ARL6_84100	-0.039494	0.56834	0.999491	211	-0.0090853	0.851683	0.98224	426	0.043161	0.566187	0.866643	179	-0.00708995	0.905645	0.964782	282	0.0799889	0.258993	0.825296	201	0.113562	0.0352554	0.24582	344
ARL8A_127829	0.0153743	0.824305	0.999491	211	-0.0280875	0.563176	0.930971	426	0.0372501	0.621555	0.884917	178	0.118138	0.047478	0.237688	282	-0.050867	0.473294	0.905448	201	-0.0391628	0.469068	0.763103	344
ARL8B_55207	0.0301507	0.663227	0.999491	211	0.00159681	0.973785	0.998141	426	0.0331341	0.65434	0.895674	185	-0.0594871	0.313555	0.605472	289	0.0369611	0.602419	0.93764	201	0.0537501	0.32022	0.653934	344
ARL9_132946	-0.0954422	0.167188	0.999491	211	-0.0765113	0.114831	0.730259	426	-0.152154	0.0420251	0.397097	179	-0.0774535	0.194687	0.483385	282	-0.011158	0.875079	0.98291	201	0.069017	0.201624	0.547486	344
ARMC10_83787	-0.0260503	0.706755	0.999491	211	-0.00462106	0.924237	0.990242	426									-0.0134352	0.890756	0.984775	107	-0.0236146	0.74444	0.903887	193
ARMC12_221481	0.0131303	0.849619	0.999491	211	0.0117185	0.809427	0.976608	426
ARMC1_55156	0.0618562	0.371305	0.999491	211	0.104802	0.0305652	0.576022	426	-0.135263	0.0718282	0.466627	178	-0.0818355	0.170548	0.457336	282
ARMC2_84071	-0.0677823	0.327148	0.999491	211	-0.00881174	0.8561	0.98418	426									0.0983258	0.313653	0.851459	107	-0.0565457	0.434755	0.742238	193
ARMC3_219681	0.135433	0.0494549	0.983057	211	0.0850152	0.0796515	0.682598	426	-0.0401439	0.593659	0.877721	179	-0.0518998	0.385252	0.666155	282	-0.0307082	0.753528	0.966559	107	0.00580528	0.936137	0.977622	193
ARMC4_55130	0.187912	0.00618518	0.98243	211	0.0785985	0.105233	0.714817	426									0.0678046	0.487722	0.91203	107	0.0955534	0.18621	0.529312	193
ARMC5_79798	-0.0906122	0.189824	0.999491	211	-0.0867307	0.0737418	0.67743	426									0.179198	0.0647694	0.647501	107	0.078879	0.275535	0.616286	193
ARMC6_93436	-0.0561515	0.417111	0.999491	211	-0.0138907	0.774977	0.97038	426	0.0279921	0.710709	0.91812	178	0.000805776	0.989252	0.997103	282	-0.128378	0.187566	0.782928	107	-0.113422	0.116289	0.428924	193
ARMC7_79637	-0.00368569	0.957557	0.999491	211	-0.0730132	0.132438	0.74879	426	0.0931893	0.214696	0.658259	179	0.220166	0.000194068	0.0153237	282	0.0205708	0.833427	0.97699	107	0.0761052	0.292824	0.631926	193
ARMC8_25852	0.0557876	0.420142	0.999491	211	-0.0184689	0.703866	0.960253	426	-0.0564691	0.454049	0.817391	178	-0.126916	0.0331348	0.197427	282	-0.196932	0.042042	0.606457	107	-0.0981122	0.174641	0.513551	193
ARMC9_80210	0.0535507	0.439047	0.999491	211	0.0274267	0.572397	0.934318	426
ARMCX1_51309	0.00118641	0.986332	0.999491	211	-0.038998	0.422061	0.887608	426									0.00364954	0.97024	0.995251	107	-0.0253725	0.726149	0.895219	193
ARMCX2_9823	0.0269393	0.69723	0.999491	211	-0.00698446	0.885709	0.987224	426									-0.161604	0.0963208	0.684155	107	-0.0727014	0.315008	0.649675	193
ARMCX3_51566	-0.072703	0.293171	0.999491	211	-0.0158096	0.744902	0.965043	426									0.048625	0.61893	0.941593	107	-0.0514708	0.477158	0.767688	193
ARMCX4_100131755	-0.0184498	0.789909	0.999491	211	0.00101945	0.983262	0.999574	426
ARMCX5-GPRASP2_100528062																	0.070388	0.320744	0.855742	201	0.0406817	0.451992	0.754569	344
ARMCX5_64860	0.0193839	0.779538	0.999491	211	-0.00198736	0.967377	0.996845	426									-0.0623393	0.523545	0.921719	107	-0.0223714	0.757464	0.908605	193
ARMCX6_54470	-0.017416	0.801428	0.999491	211	-0.00247584	0.959365	0.995815	426									-0.178416	0.0659666	0.650918	107	-0.0512849	0.478752	0.768636	193
ARMH1_339541	0.0356255	0.606847	0.999491	211	0.00583339	0.904446	0.989497	426
ARMH2_101928603	0.0321524	0.642371	0.999491	211	0.120825	0.0125733	0.468758	426
ARMH3_79591	0.0409673	0.553986	0.999491	211	0.00918518	0.850072	0.981865	426
ARMH4_145407	-0.0519171	0.453155	0.999491	211	-0.0155627	0.748752	0.965281	426
ARMS2_387715	-0.0554792	0.42272	0.999491	211	-0.0829078	0.08743	0.695825	426
ARMT1_79624	0.0714107	0.301858	0.999491	211	0.0711928	0.14239	0.758145	426
ARNT2_9915	0.0707741	0.306199	0.999491	211	0.049866	0.304497	0.847511	426	0.063032	0.392719	0.782896	186	-0.0991163	0.0914731	0.335401	291	0.0443282	0.53207	0.924311	201	3.16389e-05	0.999533	0.999983	344
ARNTL2_56938	0.0987364	0.152946	0.999491	211	0.115517	0.0170689	0.497571	426	-0.0853685	0.255862	0.692763	179	-0.0203274	0.733037	0.885761	284	-0.158373	0.0247354	0.544824	201	-0.195676	0.000260813	0.0285616	344
ARNTL_406	-0.0233026	0.736475	0.999491	211	0.0632062	0.192906	0.793603	426	0.133228	0.0754176	0.469929	179	0.0739873	0.213845	0.506747	284	-0.00534561	0.939964	0.990913	201	0.0137323	0.799664	0.925087	344
ARNT_405	0.0986199	0.153433	0.999491	211	0.0637713	0.188949	0.790982	426	-0.0717758	0.339679	0.753642	179	-0.0195451	0.742943	0.891305	284	0.0465545	0.511655	0.918742	201	-0.0027266	0.959814	0.987333	344
ARPC1A_10552	0.0480888	0.487191	0.999491	211	-0.0555934	0.25223	0.826237	426									0.112324	0.112384	0.700846	201	0.0756646	0.161433	0.497116	344
ARPC1B_10095	-0.0662435	0.338276	0.999491	211	-0.0113508	0.815299	0.977154	426	-0.0524365	0.485729	0.834055	179	-0.0646967	0.277206	0.572873	284	-0.00771765	0.913412	0.989054	201	-0.0478878	0.375908	0.698757	344
ARPC2_10109	-0.115763	0.093501	0.999491	211	-0.0996148	0.0398694	0.607565	426									0.0140265	0.843335	0.978031	201	0.0804212	0.1366	0.460972	344
ARPC3_10094	0.0164448	0.81229	0.999491	211	-0.0304037	0.531429	0.923065	426									0.102839	0.146293	0.738396	201	0.0468947	0.385899	0.706716	344
ARPC4-TTLL3_100526693									0.0726366	0.335277	0.751077	178	0.10574	0.0762688	0.304122	282	0.00513453	0.942331	0.990913	201	0.0646062	0.232027	0.574322	344
ARPC4_10093	0.0199374	0.773411	0.999491	211	-0.01614	0.739762	0.964906	426	0.053509	0.47809	0.829825	178	0.0355273	0.552416	0.781536	282	-0.0653522	0.356667	0.863375	201	-0.0590317	0.274902	0.61594	344
ARPC5L_81873	0.169705	0.0135718	0.98243	211	0.101377	0.036471	0.599002	426									0.184084	0.0576872	0.631906	107	0.194185	0.00681011	0.119597	193
ARPC5_10092	-0.0349927	0.613255	0.999491	211	-0.0280868	0.563187	0.930971	426									-0.107099	0.130208	0.725046	201	-0.179307	0.000835816	0.0505931	344
ARPIN_348110	-0.0447446	0.51801	0.999491	211	-0.0239151	0.622562	0.944942	426									-0.00912589	0.925671	0.989814	107	-0.0529734	0.464374	0.760773	193
ARPP19_10776	0.0219424	0.751337	0.999491	211	-0.0494954	0.308109	0.848999	426									0.0372142	0.703532	0.956947	107	-0.0162083	0.822971	0.935328	193
ARPP21_10777	-0.0131268	0.849659	0.999491	211	0.0114701	0.813392	0.977154	426									-0.0403602	0.569446	0.931109	201	-0.0405263	0.453722	0.7555	344
ARR3_407	0.0221463	0.749103	0.999491	211	-0.0122833	0.800431	0.974871	426									0.0430923	0.659416	0.94923	107	-0.0765341	0.290105	0.630014	193
ARRB1_408	-0.00110929	0.987251	0.999491	210	0.0569302	0.244347	0.822159	420									0.0389362	0.583156	0.933029	201	0.111339	0.0390247	0.256439	344
ARRB2_409	0.107966	0.117922	0.999491	211	0.0194848	0.688407	0.957029	426									0.00396724	0.96765	0.994536	107	0.0379499	0.600292	0.838991	193
ARRDC1_92714	0.0869836	0.20825	0.999491	211	0.0850242	0.0796193	0.682598	426									-0.0322806	0.741341	0.964202	107	-0.185757	0.00969841	0.137476	193
ARRDC2_27106	0.107154	0.120726	0.999491	211	0.109034	0.0244142	0.54211	426									-0.117329	0.228756	0.806138	107	-0.0673262	0.352213	0.68019	193
ARRDC3_57561	-0.0539569	0.435579	0.999491	211	0.0453269	0.350682	0.868544	426
ARRDC4_91947	0.0475481	0.492107	0.999491	211	0.0201114	0.678936	0.955056	426									-0.0914385	0.196709	0.785338	201	0.0394082	0.466285	0.761834	344
ARRDC5_645432	0.0202645	0.769797	0.999491	211	-0.0254454	0.600467	0.939384	426
ARSA_410	0.0397656	0.565681	0.999491	211	-0.0173444	0.721122	0.962684	426									0.145873	0.0388022	0.60281	201	0.0497006	0.358084	0.684856	344
ARSB_411	-0.0682092	0.324104	0.999491	211	0.053862	0.267327	0.83552	426									-0.0217814	0.758908	0.967805	201	-0.0438082	0.417967	0.729787	344
ARSD_414	0.0729599	0.291465	0.999491	211	-0.00694192	0.886401	0.987224	426									0.0959731	0.175323	0.775493	201	0.047394	0.380856	0.702703	344
ARSE_415	0.04427	0.522464	0.999491	211	0.0416813	0.390817	0.880401	426									0.000824048	0.990737	0.998664	201	-0.00820379	0.879497	0.957349	344
ARSF_416	-0.00394678	0.954553	0.999491	211	0.0160041	0.741875	0.964906	426									0.0624295	0.378627	0.872003	201	0.0111873	0.83621	0.940252	344
ARSG_22901	0.151218	0.0280803	0.98243	211	0.100876	0.0374103	0.601459	426	-0.0316197	0.674351	0.903882	179	0.00920456	0.877265	0.951992	284	0.105612	0.13566	0.731082	201	-0.00897374	0.868286	0.953569	344
ARSH_347527	-0.0809555	0.241646	0.999491	211	-0.0138761	0.775206	0.97038	426									0.0208273	0.83138	0.97699	107	0.0839658	0.245656	0.588572	193
ARSI_340075	0.000959449	0.988946	0.999491	211	-0.0580673	0.231703	0.819057	426									-0.0310423	0.750933	0.966055	107	0.028744	0.691505	0.881724	193
ARSJ_79642	-0.00959056	0.889856	0.999491	211	-0.0833274	0.0858342	0.691521	426									-0.0594155	0.402116	0.882712	201	-0.0436208	0.419963	0.731207	344
ARSK_153642	-0.143573	0.037166	0.98243	211	0.0174618	0.719314	0.962684	426									0.0696849	0.475705	0.906662	107	-0.0118091	0.870521	0.954235	193
ART1_417	-0.0118055	0.864639	0.999491	211	0.0447205	0.357171	0.86898	426									0.0560435	0.4294	0.891226	201	0.00728204	0.89295	0.961797	344
ART3_419	-0.0641628	0.353699	0.999491	211	-0.0769833	0.112602	0.726779	426	-0.067867	0.358674	0.762991	185	-0.0713743	0.226414	0.518753	289	-0.0456511	0.51989	0.920336	201	-0.000660902	0.990255	0.996746	344
ART4_420	0.126961	0.0656628	0.987144	211	0.0276483	0.569298	0.93324	426									-0.026486	0.708979	0.957192	201	-0.0419725	0.437759	0.744616	344
ART5_116969	-0.0139136	0.840765	0.999491	211	-0.0499816	0.303376	0.847511	426									-0.122519	0.0831484	0.671199	201	-0.0970775	0.0721428	0.342229	344
ARTN_9048	-0.0729634	0.291441	0.999491	211	-0.0368542	0.448041	0.898877	426
ARV1_64801	-0.0785265	0.256107	0.999491	211	-0.0196177	0.686394	0.956712	426									-0.0232032	0.743702	0.964463	201	-0.0458884	0.396186	0.713773	344
ARVCF_421	-0.0373525	0.589513	0.999491	211	0.0256616	0.597374	0.939141	426	-0.0569926	0.449869	0.815215	178	-0.10987	0.065414	0.280925	282	-0.186021	0.0550605	0.628433	107	-0.0870276	0.2288	0.571573	193
ARX_170302	-0.0331454	0.632126	0.999491	211	-0.0360937	0.457471	0.902523	426	-0.108178	0.149468	0.588085	179	-0.0421727	0.479015	0.73542	284	-0.0660767	0.351349	0.861563	201	0.025325	0.639731	0.858045	344
AR_367	-0.0536324	0.438348	0.999491	211	0.0269108	0.579647	0.936692	426	-0.0628684	0.393951	0.783661	186	0.0599965	0.307739	0.601377	291	0.156499	0.0265138	0.555239	201	0.100503	0.0626047	0.320518	344
AS3MT_57412	-0.0484845	0.484662	0.999491	210	0.0483738	0.322667	0.857119	420									-0.0142756	0.840589	0.978031	201	-0.122497	0.0230696	0.201987	344
ASAH1_427	0.0677398	0.327453	0.999491	211	0.071033	0.143291	0.758678	426									-0.00161813	0.981811	0.997787	201	0.00611539	0.910021	0.967604	344
ASAH2B_653308	-0.00419444	0.951705	0.999491	211	0.0303974	0.531514	0.923065	426
ASAH2_56624	-0.021908	0.751714	0.999491	211	-0.0357189	0.462158	0.904971	426									0.0255839	0.718465	0.958617	201	0.0122815	0.820448	0.934907	344
ASAP1_50807	0.0116715	0.866161	0.999491	211	0.0324286	0.504435	0.919083	426	-0.00442729	0.953097	0.989285	179	0.147935	0.0128859	0.12517	282	-0.0956769	0.32693	0.857114	107	0.0369624	0.609815	0.842593	193
ASAP2_8853	0.104323	0.130916	0.999491	211	0.0575409	0.235969	0.822159	426	0.0332322	0.658762	0.897338	179	-0.0435578	0.466273	0.724313	282	0.0955587	0.177202	0.778101	201	-0.0372417	0.491166	0.774712	344
ASAP3_55616	0.0362107	0.600948	0.999491	211	-0.00487222	0.920133	0.990242	426	-0.0959846	0.201199	0.645586	179	-0.0811523	0.174157	0.46235	282	0.0919476	0.346224	0.85915	107	0.0899424	0.213527	0.557714	193
ASB10_136371	0.0115088	0.868009	0.999491	211	-0.00659301	0.892074	0.987808	426	-0.0320366	0.671188	0.90283	178	0.0124326	0.835339	0.935256	282	0.104233	0.285319	0.838945	107	0.0107903	0.881606	0.95785	193
ASB11_140456	0.0142072	0.83745	0.999491	211	0.0723261	0.136129	0.752453	426	-0.0466575	0.535126	0.856216	179	0.0312346	0.601451	0.810863	282	0.00943036	0.923199	0.989814	107	0.0380391	0.599435	0.838539	193
ASB12_142689	0.0138307	0.841701	0.999491	211	0.0521944	0.282443	0.843274	426	-0.0819748	0.275316	0.704082	179	-0.031511	0.598235	0.809876	282	-0.00555224	0.954737	0.992903	107	-0.0995646	0.168316	0.505884	193
ASB13_79754	0.0730597	0.290803	0.999491	211	0.0804086	0.097434	0.704508	426	-0.0463169	0.531286	0.854965	185	-0.126632	0.0313901	0.192863	289	-0.160112	0.099474	0.688699	107	-0.0387401	0.592719	0.835258	193
ASB14_142686	0.0956052	0.16646	0.999491	211	0.0305801	0.529049	0.92284	426	-0.117747	0.116466	0.543556	179	-0.112414	0.0593825	0.266264	282	0.166226	0.0870459	0.67819	107	0.0934062	0.196344	0.542677	193
ASB15_142685	-0.132452	0.0547294	0.983399	211	-0.00596922	0.902232	0.989035	426	-0.0742643	0.323156	0.744424	179	-0.048361	0.418524	0.690969	282	-0.0410868	0.674346	0.953169	107	0.0445456	0.538467	0.805124	193
ASB16_92591	0.0532896	0.441285	0.999491	211	0.070577	0.145883	0.760498	426	-0.00613624	0.935026	0.983171	179	0.13174	0.0269592	0.17798	282	-0.00961515	0.921699	0.989814	107	0.00586367	0.935496	0.977368	193
ASB17_127247	-0.0814645	0.238689	0.999491	211	-0.0444286	0.360321	0.870304	426									0.0188144	0.847469	0.979146	107	-0.0350945	0.628009	0.851525	193
ASB18_401036	0.0124722	0.857074	0.999491	211	0.0725029	0.135172	0.752453	426	0.0494082	0.512504	0.846944	178	0.0131829	0.825555	0.930234	282	-0.0888386	0.362843	0.864539	107	-0.006473	0.92881	0.974709	193
ASB1_51665	0.0106666	0.87759	0.999491	211	0.0204357	0.674053	0.954444	426									0.096367	0.323437	0.856403	107	-0.00582282	0.935944	0.977604	193
ASB2_51676	-0.0649771	0.347611	0.999491	211	0.0260046	0.592482	0.939141	426									-0.167034	0.0855014	0.674471	107	-0.122715	0.0890988	0.379867	193
ASB3_51130	0.0576399	0.404852	0.999491	211	0.0236298	0.62672	0.946507	426									-0.0796837	0.414573	0.886244	107	-0.125949	0.0809279	0.362302	193
ASB4_51666	0.0056229	0.935289	0.999491	211	0.0174203	0.719952	0.962684	426	-0.21737	0.00346815	0.170731	179	-0.139413	0.0191712	0.151568	282	0.0809171	0.407364	0.884232	107	0.208846	0.00355971	0.0867578	193
ASB5_140458	-0.091351	0.186224	0.999491	211	0.00294166	0.951728	0.994386	426									0.0211173	0.829067	0.976572	107	0.0669142	0.355174	0.682213	193
ASB6_140459	0.053774	0.437139	0.999491	211	-0.000700593	0.988497	0.999809	426									-0.0646005	0.508564	0.91821	107	-0.118778	0.0999234	0.401202	193
ASB7_140460	-0.102284	0.138654	0.999491	211	-0.0251343	0.60493	0.941158	426	0.116998	0.119876	0.548431	178	-0.0855486	0.1519	0.428208	282	0.0964666	0.322935	0.856403	107	0.129468	0.0727333	0.343002	193
ASB8_140461	-0.057039	0.409776	0.999491	211	0.0289647	0.551046	0.926007	426									-0.0600647	0.538838	0.925568	107	-0.0557779	0.441029	0.746537	193
ASB9_140462	0.0610824	0.37733	0.999491	211	0.0306839	0.52765	0.92284	426									-0.0878419	0.368274	0.867322	107	-0.0902623	0.211896	0.556686	193
ASCC1_51008	0.140822	0.040993	0.98243	211	0.0427772	0.378469	0.877028	426									0.154866	0.111216	0.700846	107	0.133633	0.0639176	0.322572	193
ASCC2_84164	0.00900955	0.89649	0.999491	211	-0.0221081	0.649094	0.95107	426									0.0428897	0.545477	0.925568	201	0.0425208	0.431793	0.740726	344
ASCC3_10973	-0.0176931	0.798336	0.999491	211	-0.0314573	0.517293	0.922024	426	-0.16868	0.0244005	0.333045	178	-0.0638018	0.285636	0.581554	282	-0.0524471	0.459641	0.899053	201	0.0148864	0.783231	0.918722	344
ASCL1_429	0.0127226	0.854236	0.999491	211	0.0138983	0.774856	0.97038	426	0.00163279	0.982693	0.996311	179	0.0113986	0.848329	0.941031	284	-0.0277957	0.695287	0.955203	201	0.0654187	0.226196	0.569123	344
ASCL2_430	0.00652657	0.924917	0.999491	211	0.00863767	0.858912	0.984627	426	0.0468959	0.53304	0.855714	179	0.0593124	0.319241	0.610539	284	-0.0977176	0.167571	0.762625	201	-0.0939912	0.0817208	0.36399	344
ASCL3_56676	-0.0471986	0.495298	0.999491	211	0.0517336	0.28672	0.845391	426	0.0459407	0.542571	0.85976	178	0.0227016	0.704257	0.87263	282	0.0177575	0.802428	0.973095	201	0.0425631	0.431334	0.740396	344
ASCL4_121549	-0.099417	0.150121	0.999491	211	-0.0168488	0.728772	0.964022	426	-0.215931	0.00379385	0.17489	178	-0.143782	0.015677	0.136638	282	-0.0692764	0.328464	0.857132	201	0.015516	0.774305	0.914685	344
ASCL5_647219	0.0311524	0.652756	0.999491	211	-0.0206674	0.670572	0.954221	426
ASF1A_25842	-0.0160217	0.817466	0.999491	210	-0.00337511	0.945019	0.993307	420	0.0193785	0.796813	0.948937	179	0.0608118	0.307139	0.601087	284	-0.00411882	0.953724	0.992864	201	0.0614034	0.256045	0.598558	344
ASF1B_55723	0.129835	0.0603522	0.983399	210	0.00985964	0.840335	0.980199	420	-0.00071525	0.992418	0.997581	179	-0.0483901	0.416583	0.68937	284	-0.128703	0.0686257	0.657615	201	0.00873603	0.871745	0.954466	344
ASGR1_432	0.0653057	0.345173	0.999491	211	0.0552014	0.255596	0.828421	426	0.0169982	0.818364	0.953941	185	0.0392514	0.506282	0.753283	289	0.0631614	0.373051	0.870621	201	0.00756233	0.888856	0.959648	344
ASGR2_433	-0.0411205	0.552503	0.999491	211	7.3254e-05	0.998797	0.999949	426	-0.117445	0.117414	0.54542	179	-0.104757	0.0790561	0.31043	282	-0.126087	0.0744946	0.665116	201	-0.0974898	0.0709356	0.339967	344
ASH1L_55870	0.0177503	0.798174	0.999491	210	0.0824724	0.0914073	0.699746	420	0.0287172	0.70276	0.914873	179	0.0810826	0.172994	0.460643	284	0.0662624	0.349994	0.860701	201	0.0984891	0.0680781	0.333169	344
ASH2L_9070	0.0788215	0.255461	0.999491	210	0.0647253	0.185533	0.787004	420	-0.0966505	0.198076	0.642723	179	-0.104839	0.0777582	0.307753	284	-0.0291761	0.680962	0.953282	201	-0.0539251	0.318645	0.653021	344
ASIC1_41	-0.106327	0.123638	0.999491	211	0.0532528	0.272784	0.837937	426									-0.041516	0.67114	0.952347	107	-0.17985	0.0123229	0.151713	193
ASIC2_40	-0.00222292	0.974394	0.999491	211	0.0624017	0.198644	0.795982	426									-0.0544836	0.442374	0.893902	201	-0.0401532	0.457893	0.757284	344
ASIC3_9311	-0.0412869	0.550896	0.999491	211	-0.019757	0.684286	0.956018	426
ASIC4_55515	-0.0219204	0.751578	0.999491	211	0.0121275	0.80291	0.974997	426									-0.143764	0.139588	0.736994	107	0.029952	0.679243	0.87593	193
ASIC5_51802	-0.176778	0.0100855	0.98243	211	-0.0431031	0.374844	0.875792	426									-0.0560436	0.5664	0.930819	107	0.0327442	0.651223	0.862549	193
ASIP_434	-0.0738922	0.285326	0.999491	211	-0.0646454	0.182946	0.78504	426									-0.12692	0.0725835	0.663043	201	-0.106711	0.0479693	0.283401	344
ASL_435	0.0358751	0.604328	0.999491	211	-0.0127116	0.793626	0.97351	426	0.0244392	0.746081	0.932455	178	-0.0320961	0.591454	0.805552	282	0.183124	0.0092661	0.466553	201	0.127658	0.0178468	0.181172	344
ASMTL_8623	-0.00532889	0.938665	0.999491	211	-0.0279663	0.564862	0.931531	426									0.032314	0.648827	0.947036	201	0.150735	0.00508548	0.102659	344
ASMT_438	-0.0375347	0.587697	0.999491	211	-0.00741171	0.87877	0.98639	426									-0.128376	0.0693373	0.660156	201	-0.150028	0.00529901	0.10532	344
ASNA1_439	-0.0361681	0.601377	0.999491	211	0.0284	0.55884	0.928359	426									0.0884128	0.211996	0.796963	201	0.0982419	0.0687761	0.334497	344
ASNSD1_54529	0.0345742	0.617508	0.999491	211	0.00967763	0.842136	0.980322	426									0.0129773	0.854919	0.979976	201	-0.00742423	0.890873	0.960897	344
ASNSP1_389652									0.0251465	0.738279	0.929697	179	0.111431	0.0607332	0.269681	284
ASNS_440	-0.0553273	0.423993	0.999491	211	0.0807273	0.0961098	0.703317	426									-0.0625334	0.377832	0.87147	201	-0.0556055	0.303775	0.641997	344
ASPA_443	-0.0328121	0.635557	0.999491	211	-0.0436945	0.36832	0.871717	426									-0.113198	0.1096	0.700846	201	-0.0744969	0.168018	0.505297	344
ASPDH_554235	-0.107575	0.119266	0.999491	211	-0.0786333	0.105079	0.714752	426
ASPG_374569	-0.0354236	0.608888	0.999491	211	0.0168699	0.728447	0.964022	426
ASPHD1_253982	0.111285	0.107824	0.999491	210	0.0396702	0.417427	0.886416	420									0.0574147	0.556927	0.927263	107	0.0278086	0.701057	0.88535	193
ASPHD2_57168	-0.0112517	0.87124	0.999491	210	0.0159444	0.744568	0.965043	420	-0.0174999	0.816141	0.95338	179	-0.0532406	0.371373	0.654086	284	-0.00386029	0.968522	0.994764	107	-0.101089	0.161863	0.4977	193
ASPH_444	-0.0155671	0.822558	0.999491	210	-0.0242054	0.620842	0.944942	420	-0.0846778	0.259742	0.695679	179	-0.0806582	0.175261	0.462687	284	0.0162132	0.819302	0.975794	201	-0.0245118	0.65052	0.862484	344
ASPM_259266	-0.0831104	0.229302	0.999491	211	-0.0466876	0.336395	0.864464	426									0.0374119	0.702031	0.956216	107	-0.0773901	0.284728	0.625793	193
ASPN_54829									-0.0368491	0.625316	0.886018	178	-0.0616561	0.302182	0.597249	282	0.0227031	0.816449	0.975582	107	0.00552647	0.939198	0.97889	193
ASPRV1_151516	0.0823048	0.233864	0.999491	211	-0.0199124	0.681938	0.955743	426	0.0239591	0.750219	0.93261	179	-0.0569662	0.340514	0.628757	282	-0.137505	0.157838	0.753309	107	0.0550559	0.446974	0.751105	193
ASPSCR1_79058	-0.156235	0.0232127	0.98243	211	-0.000623883	0.989756	0.999923	426	-0.124942	0.096571	0.513778	178	-0.0607189	0.309604	0.60206	282
ASRGL1_80150	-0.0410028	0.553642	0.999491	211	0.0827025	0.0882193	0.696697	426									0.122834	0.0823515	0.671199	201	0.0593882	0.272009	0.613711	344
ASS1_445	-0.0164532	0.812196	0.999491	211	-0.0605883	0.212031	0.803385	426	-0.142718	0.0573784	0.43966	178	-0.152921	0.0101197	0.114963	282	-0.0450098	0.525777	0.923009	201	-0.0529904	0.327117	0.659939	344
ASTE1_28990	0.09162	0.184925	0.999491	211	-0.0348534	0.473084	0.908823	426									-0.123355	0.205566	0.79306	107	-0.0410362	0.570966	0.823237	193
ASTL_431705	-0.0450076	0.515551	0.999491	211	-0.0917984	0.0583407	0.652237	426									-0.0222491	0.820057	0.975794	107	0.0973209	0.178161	0.517506	193
ASTN1_460	-0.0595994	0.389043	0.999491	211	-0.0216351	0.656115	0.952027	426									-0.0270651	0.78199	0.970763	107	-0.114078	0.114179	0.425221	193
ASTN2_23245	-0.0230183	0.739574	0.999491	211	-0.0284708	0.55786	0.927908	426	0.0417013	0.580479	0.874446	178	0.090624	0.128964	0.397755	282	-0.114537	0.240102	0.814497	107	-0.0757025	0.295394	0.634567	193
ASXL1_171023	0.152248	0.0273842	0.98243	210	0.0139718	0.775263	0.97038	420	-0.044765	0.551831	0.861776	179	-0.107012	0.071764	0.2941	284	-0.20705	0.0323686	0.586309	107	-0.0905661	0.210356	0.555689	193
ASXL2_55252									-0.219611	0.00266854	0.164974	185	-0.0239636	0.684982	0.861358	289	0.135779	0.163172	0.761127	107	0.0980477	0.174926	0.514073	193
ASXL3_80816	-0.0471296	0.495929	0.999491	211	-0.0109772	0.821273	0.977768	426	-0.12802	0.0876684	0.498261	179	-0.0641876	0.281011	0.576114	284
ASZ1_136991	-0.0658763	0.342126	0.999491	210	-0.0240836	0.622601	0.944942	420									0.154514	0.11204	0.700846	107	0.0414866	0.566744	0.821649	193
ATAD1_84896	0.0359653	0.603419	0.999491	211	0.0361302	0.457015	0.902426	426	0.0077271	0.918465	0.981313	178	0.0376004	0.529456	0.767153	282	0.00925726	0.924605	0.989814	107	0.0611105	0.398531	0.715613	193
ATAD2B_54454	0.0193383	0.780558	0.999491	210	0.0694857	0.155169	0.768374	420	0.0632562	0.400222	0.787669	179	0.0285253	0.632157	0.83028	284	0.108643	0.124729	0.715699	201	-0.0193243	0.720986	0.892931	344
ATAD2_29028	0.0340632	0.623554	0.999491	210	0.0503917	0.302869	0.847511	420									-0.0939783	0.335631	0.858398	107	-0.0680436	0.347094	0.675681	193
ATAD3A_55210	0.031658	0.647497	0.999491	211	-0.0406529	0.402622	0.884578	426	-0.0534856	0.477032	0.829553	179	-0.023834	0.690247	0.864842	282	-0.161323	0.0969086	0.684344	107	-0.0122479	0.865754	0.952568	193
ATAD3B_83858	0.0317962	0.646063	0.999491	211	0.0615596	0.204782	0.800947	426	-0.197351	0.00757641	0.227986	182	-0.106858	0.0711711	0.292572	286	-0.19758	0.0413566	0.605525	107	-0.147682	0.040405	0.260348	193
ATAD3C_219293	0.0281869	0.683944	0.999491	211	0.0425355	0.381172	0.877233	426	-0.0628303	0.399441	0.787163	182	-0.0475965	0.422635	0.692254	286
ATAD5_79915	0.0205567	0.766573	0.999491	211	-0.0386969	0.425656	0.890056	426	0.000745585	0.992119	0.997581	178	-0.0795078	0.183077	0.471375	282	-0.083385	0.393161	0.879641	107	-0.0466993	0.518989	0.792065	193
ATAT1_79969	0.0830475	0.229656	0.999491	211	0.086013	0.0761691	0.67966	426	-0.0717296	0.339991	0.753642	179	-0.145918	0.01384	0.129672	284
ATCAY_85300	-0.0883854	0.200985	0.999491	211	-0.0731769	0.13157	0.747699	426									-0.113303	0.109269	0.700846	201	-0.0965999	0.0735621	0.345333	344
ATE1_11101	-0.00867221	0.900345	0.999491	211	0.0401632	0.408319	0.886001	426									-0.109788	0.120783	0.707594	201	-0.0405748	0.453182	0.755338	344
ATF1_466	-0.120629	0.0804271	0.991144	211	0.0127799	0.792543	0.973367	426	0.154279	0.039207	0.389033	179	0.13505	0.0228277	0.163715	284	0.0127879	0.857014	0.97998	201	-0.0303485	0.574824	0.825515	344
ATF2_1386	0.0576243	0.406108	0.999491	210	-0.0470754	0.33584	0.864464	420	0.0341242	0.6502	0.895674	179	0.0431037	0.469355	0.726957	284	0.246355	0.000422857	0.239461	201	0.13303	0.0135364	0.158271	344
ATF3_467	0.16774	0.0149516	0.98243	210	0.176817	0.000270941	0.164024	420	-0.00636409	0.932619	0.983171	179	-0.0969784	0.102901	0.355188	284	0.0180953	0.798749	0.972414	201	-0.00361233	0.946777	0.98223	344
ATF4_468	0.0632482	0.360617	0.999491	211	0.0117891	0.808301	0.976608	426	-0.0739852	0.324983	0.74561	179	-0.0829629	0.16321	0.446366	284	-0.0547106	0.440472	0.893902	201	0.0856725	0.112712	0.422107	344
ATF5_22809	-0.147761	0.0319214	0.98243	211	-0.110422	0.0226453	0.537726	426	0.0564541	0.452887	0.81659	179	-7.02633e-05	0.999059	0.99931	284	-0.140295	0.0469835	0.607858	201	-0.17936	0.000832809	0.0505931	344
ATF6B_1388	-0.0455765	0.510251	0.999491	211	0.0508978	0.294587	0.847156	426	-0.0991428	0.1867	0.628243	179	-0.0578735	0.331142	0.620795	284	0.0279578	0.6936	0.954911	201	-0.00913424	0.865953	0.952624	344
ATF6_22926	-0.000891435	0.98973	0.999491	211	0.018385	0.705149	0.960253	426	-0.0588592	0.433836	0.806829	179	-0.0221929	0.709596	0.875809	284	0.0202504	0.775386	0.969689	201	-0.0108719	0.840764	0.942559	344
ATF7IP2_80063	-0.0546988	0.430392	0.999491	210	0.00391331	0.936269	0.991482	420									0.105161	0.137347	0.734268	201	0.133761	0.0130271	0.155795	344
ATF7IP_55729	0.0283434	0.683005	0.999491	210	0.00860173	0.860482	0.984977	420									0.0686559	0.332825	0.858398	201	-0.0543033	0.315257	0.649949	344
ATF7_11016	-0.0542709	0.432907	0.999491	211	0.0325986	0.502202	0.917997	426									0.0313053	0.65909	0.94923	201	0.0276806	0.608911	0.842593	344
ATG101_60673	0.048218	0.486021	0.999491	211	0.0546631	0.260267	0.830404	426									0.0895567	0.358961	0.863415	107	-0.0317629	0.661017	0.867158	193
ATG10_83734	-0.116287	0.0920157	0.999491	211	0.0202879	0.676275	0.955029	426	0.0616513	0.403189	0.789355	186	0.115112	0.0497939	0.24273	291	-0.0973385	0.31856	0.854815	107	-0.0292031	0.686836	0.879435	193
ATG12_9140	-0.0694244	0.315538	0.999491	211	-0.0310382	0.522893	0.922355	426	-0.100477	0.172399	0.614354	186	-0.0756673	0.198067	0.487665	291	0.0823839	0.244957	0.814497	201	0.152947	0.0044667	0.0969424	344
ATG13_9776	-0.0482446	0.48578	0.999491	211	0.00490752	0.919556	0.990242	426	0.0432998	0.558397	0.863361	185	-0.00272154	0.963258	0.987401	289
ATG14_22863	0.000121468	0.998601	0.999972	211	0.00677612	0.889096	0.987365	426	0.0155628	0.83619	0.960654	179	0.000501548	0.993286	0.997748	284	-0.0109295	0.911037	0.988413	107	-0.0778128	0.282097	0.623473	193
ATG16L1_55054	-0.0629816	0.362648	0.999491	211	0.068057	0.160862	0.772803	426	-0.149539	0.0457246	0.409338	179	-0.129195	0.0294981	0.187333	284	0.0121865	0.900854	0.985592	107	-0.0454601	0.530152	0.79945	193
ATG16L2_89849	-0.0291849	0.673385	0.999491	211	0.0594844	0.220491	0.808591	426	-0.214083	0.00400704	0.177534	179	-0.169772	0.00411404	0.0737291	284	0.126135	0.195457	0.784959	107	0.0611314	0.398369	0.715509	193
ATG2A_23130	0.0444413	0.520854	0.999491	211	0.063483	0.19096	0.792475	426	-0.0587275	0.427165	0.803589	185	-0.0755654	0.200237	0.489994	289
ATG2B_55102	0.0267989	0.698732	0.999491	211	-0.0312463	0.520109	0.922355	426	-0.0378667	0.608836	0.884099	185	-0.0567449	0.336423	0.626553	289
ATG3_64422	-0.110075	0.110871	0.999491	211	-0.0271633	0.576094	0.935553	426	0.0445407	0.546071	0.860393	186	0.128035	0.0289836	0.185212	291	0.163766	0.0918904	0.680687	107	0.0921612	0.202401	0.548032	193
ATG4A_115201	-0.0242185	0.726522	0.999491	211	0.0148653	0.759657	0.966734	426	-0.0578255	0.433055	0.806829	186	0.0890768	0.129517	0.398494	291	-0.0022708	0.974477	0.99606	201	-0.116513	0.0307341	0.232064	344
ATG4B_23192	-0.0816047	0.237879	0.999491	211	-0.0559476	0.249216	0.823703	426	-0.0104987	0.889068	0.975576	179	0.00870137	0.883926	0.954359	284	0.0616733	0.38444	0.876242	201	0.0138467	0.798031	0.924498	344
ATG4C_84938	-0.054226	0.433289	0.999491	211	-0.00119273	0.980418	0.999202	426	-0.0679923	0.357786	0.762506	185	-0.0596952	0.311862	0.603958	289	0.117506	0.0966514	0.684155	201	0.16634	0.00196468	0.0695946	344
ATG4D_84971	0.124514	0.0710809	0.987144	211	0.0122332	0.801228	0.974914	426	0.0393077	0.595263	0.878953	185	0.0153289	0.795268	0.915849	289	-0.0233139	0.742523	0.96423	201	0.0221651	0.682059	0.876453	344
ATG5_9474	-0.0652219	0.345794	0.999491	211	0.0231812	0.633281	0.947857	426	0.0402348	0.586604	0.876483	185	0.0781323	0.185331	0.474179	289	-0.0397335	0.684493	0.953985	107	-0.184418	0.0102455	0.140707	193
ATG7_10533	-0.00574113	0.933931	0.999491	211	0.0226556	0.641007	0.948768	426	-0.0740054	0.324851	0.74552	179	0.0339239	0.569126	0.794252	284	-0.143799	0.0416914	0.606025	201	-0.0113884	0.833308	0.939069	344
ATG9A_79065	0.0516603	0.455396	0.999491	211	0.0917639	0.0584357	0.652237	426	-0.15958	0.0295803	0.354741	186	-0.0561104	0.340183	0.628728	291
ATG9B_285973									-0.0339388	0.645605	0.894182	186	-0.0621653	0.290549	0.585231	291	0.0428518	0.6612	0.949614	107	-0.0308087	0.670597	0.87201	193
ATIC_471	0.0272331	0.694093	0.999491	211	-0.0165302	0.733705	0.96429	426	-0.0129681	0.863592	0.967567	178	-0.0687421	0.249892	0.543835	282	0.0373969	0.598145	0.937095	201	0.119562	0.0265938	0.216511	344
ATL1_51062	0.0566826	0.412712	0.999491	211	-0.0125586	0.796056	0.974463	426									-0.155372	0.110038	0.700846	107	-0.013977	0.84702	0.944861	193
ATL2_64225	0.0681385	0.324607	0.999491	211	0.0627345	0.196256	0.795629	426	0.0483312	0.520566	0.850721	179	-0.00417358	0.944174	0.980314	284	-0.0866632	0.374759	0.870952	107	-0.00848154	0.906808	0.966719	193
ATL3_25923	0.0918441	0.183849	0.999491	211	-0.0264341	0.586382	0.938492	426	-0.0837015	0.265296	0.69794	179	-0.0651867	0.273576	0.57174	284	0.0277759	0.776413	0.969689	107	0.0440345	0.543142	0.807265	193
ATMIN_23300	-0.00983291	0.887091	0.999491	211	-0.0238396	0.623662	0.945064	426									-0.185241	0.0561061	0.629395	107	-0.0480182	0.507241	0.784169	193
ATM_472	-0.0202705	0.769731	0.999491	211	-0.0187464	0.699632	0.959327	426	-0.0734853	0.318863	0.741267	186	-0.0558171	0.342717	0.630928	291	-0.119446	0.0912339	0.680117	201	-0.138198	0.0102822	0.140904	344
ATN1_1822	0.0392079	0.572072	0.999491	210	-0.0401034	0.412356	0.886001	420	0.031664	0.673921	0.903882	179	-0.0115605	0.846741	0.940167	282	0.0292464	0.680236	0.953169	201	0.0597654	0.268971	0.611619	344
ATOH1_474	-0.130238	0.0589413	0.983399	211	-0.0497126	0.305988	0.847511	426	-0.197785	0.0079563	0.229142	179	-0.142818	0.0160157	0.13888	284	0.0872267	0.230189	0.807699	191	0.0408699	0.458658	0.757389	331
ATOH7_220202	0.0252558	0.715305	0.999491	211	0.00512104	0.916069	0.990242	426	-0.166806	0.0256328	0.337953	179	-0.169141	0.00425704	0.0756122	284	-0.0373876	0.598236	0.937095	201	-0.0161187	0.765788	0.911212	344
ATOH8_84913	0.0911633	0.187134	0.999491	211	-0.0420336	0.38682	0.878674	426	-0.15911	0.033386	0.371863	179	-0.192074	0.00118954	0.040715	282	-0.0802425	0.257481	0.824942	201	-0.073015	0.176663	0.515344	344
ATOX1_475	0.0069972	0.919521	0.999491	211	0.0395	0.416108	0.886001	426	-0.0433626	0.564372	0.865839	179	-0.115437	0.0528208	0.249701	282	-0.0105488	0.881848	0.983757	201	0.0140615	0.794967	0.923418	344
ATP10A_57194	-0.0373153	0.589885	0.999491	211	-0.0121854	0.801989	0.974983	426	0.168308	0.0243147	0.333045	179	0.07509	0.208699	0.500564	282	-0.0342688	0.629127	0.943551	201	-0.0869209	0.107546	0.413187	344
ATP10B_23120	0.00493982	0.943136	0.999491	211	0.00916609	0.85038	0.981903	426	-0.0288144	0.702607	0.914823	178	-0.0552625	0.355174	0.64019	282
ATP10D_57205	-0.00742399	0.91463	0.999491	211	-0.0253653	0.601615	0.939384	426	-0.010247	0.892018	0.976528	178	-0.0218886	0.714377	0.877223	282
ATP11AUN_400165																	-0.0712725	0.465685	0.901154	107	-0.108605	0.132728	0.455149	193
ATP11A_23250	-0.0315473	0.648647	0.999491	211	-0.00757056	0.876192	0.98639	426	-0.0361666	0.63077	0.887038	179	-0.10119	0.0898699	0.331198	282	0.023939	0.735871	0.963665	201	-0.0512241	0.343522	0.672946	344
ATP11B_23200	0.00778587	0.910485	0.999491	211	0.0808295	0.0956879	0.703317	426	0.146869	0.0497783	0.417572	179	0.119736	0.0445359	0.229	282	-0.130227	0.0653827	0.649755	201	-0.0107555	0.842447	0.943267	344
ATP11C_286410	-0.0646219	0.350258	0.999491	211	-0.106633	0.0277577	0.568936	426	-0.0727549	0.333115	0.750516	179	-0.0355429	0.552242	0.781429	282	-0.126667	0.073159	0.665116	201	-0.11464	0.0335425	0.240584	344
ATP12A_479	-0.056156	0.417074	0.999491	211	-0.0149165	0.758855	0.966722	426	-0.0195221	0.79534	0.94852	179	0.0136327	0.819703	0.928152	282	0.0229194	0.74673	0.965838	201	0.0223176	0.679991	0.876006	344
ATP13A1_57130	-0.0226649	0.743432	0.999491	211	-0.0452572	0.351424	0.868544	426	-0.144433	0.0537352	0.432531	179	-0.124679	0.0363864	0.209366	282	-0.0690071	0.330353	0.857132	201	-0.123319	0.022159	0.199323	344
ATP13A2_23400	-0.00132936	0.984685	0.999491	211	-0.0610373	0.208657	0.802264	426	0.100974	0.179889	0.621584	178	-0.0142879	0.811198	0.924193	282	-0.0986151	0.163684	0.761335	201	0.0267493	0.621017	0.847877	344
ATP13A3_79572	-0.0891425	0.197139	0.999491	211	-0.0226054	0.641746	0.948821	426	-0.199695	0.00736073	0.226648	179	-0.0671289	0.261205	0.557644	282
ATP13A4_84239	0.0911469	0.187213	0.999491	211	-0.034323	0.479849	0.911418	426	-0.14244	0.057161	0.43966	179	-0.199986	0.000731202	0.0315208	282
ATP13A5_344905	-0.0408825	0.554807	0.999491	211	-0.0246251	0.612268	0.942298	426	-0.198441	0.00774725	0.227986	179	-0.194299	0.00103934	0.038089	282
ATP1A1_476	0.0955247	0.166819	0.999491	211	0.10289	0.0337516	0.589504	426	0.106825	0.154652	0.596977	179	0.0977231	0.101488	0.352818	282	0.112904	0.11053	0.700846	201	0.0674173	0.212297	0.556793	344
ATP1A2_477	-0.0524344	0.44866	0.999491	211	-0.0961135	0.0474206	0.631234	426	0.0246549	0.741119	0.930829	182	-0.0717698	0.226286	0.518753	286	0.00247027	0.972236	0.995647	201	0.0613295	0.256618	0.59877	344
ATP1A3_478	-0.0684269	0.322559	0.999491	211	-0.0798171	0.0999304	0.70685	426	-0.262683	0.000340331	0.0999181	182	-0.127435	0.0312024	0.192005	286	-0.0506295	0.475364	0.906628	201	-0.0340129	0.529526	0.799297	344
ATP1A4_480	-0.0241932	0.726796	0.999491	211	0.0166682	0.731567	0.964022	426	0.00258394	0.972693	0.994518	178	0.060574	0.310763	0.602854	282	-0.000118823	0.998664	0.999827	201	0.0392129	0.468499	0.762856	344
ATP1B1_481	-0.011751	0.865258	0.999491	211	-0.00173875	0.971456	0.997711	426									-0.0770134	0.277187	0.834817	201	-0.0305468	0.572327	0.823848	344
ATP1B2_482	0.205501	0.00270495	0.953229	211	0.0330429	0.49639	0.916269	426									-0.0362574	0.710811	0.957192	107	0.0396142	0.584394	0.830845	193
ATP1B3_483	-0.0180462	0.794401	0.999491	211	-0.0955104	0.0488354	0.640267	426									-0.103824	0.142446	0.737328	201	-0.0669593	0.215427	0.559262	344
ATP1B4_23439	-0.0474165	0.493307	0.999491	211	-0.0394156	0.417105	0.886001	426									0.0212429	0.764692	0.968321	201	0.0300895	0.578094	0.827746	344
ATP23_91419	-0.000655036	0.992453	0.999963	211	-0.0555136	0.252913	0.826709	426									-0.0225995	0.817272	0.975732	107	-0.0240572	0.739821	0.90196	193
ATP2A1_487	-0.038494	0.578182	0.999491	211	-0.0882903	0.0686838	0.672439	426	0.00883808	0.906528	0.980178	179	-0.0633682	0.28893	0.584678	282	-0.124558	0.0781079	0.665116	201	-0.0878452	0.103843	0.406478	344
ATP2A2_488	-0.10381	0.13283	0.999491	211	0.0300217	0.536603	0.923421	426	-0.0124163	0.868975	0.969648	179	-0.00153459	0.979532	0.993835	282	0.0393239	0.579407	0.933029	201	-0.028676	0.596088	0.836952	344
ATP2A3_489	0.127573	0.064362	0.987144	211	0.0157856	0.745277	0.965043	426	-0.117578	0.118039	0.545828	178	-0.125096	0.0357595	0.207556	282	0.0359261	0.612627	0.940122	201	0.0594084	0.271846	0.613709	344
ATP2B1_490	0.0719587	0.298154	0.999491	211	-0.0550291	0.257084	0.828421	426	-0.0148398	0.844138	0.963033	178	-0.0573083	0.337617	0.627213	282	0.13254	0.060704	0.637407	201	0.134297	0.0126645	0.153986	344
ATP2B2_491	-0.0222694	0.747756	0.999491	211	-0.0061153	0.899852	0.989035	426	-0.0611659	0.417328	0.799705	178	-0.151399	0.0109019	0.118937	282	0.0190675	0.788186	0.971804	201	-0.0933407	0.0838651	0.368518	344
ATP2B3_492	0.00675615	0.922284	0.999491	211	0.0253954	0.601183	0.939384	426	0.0177466	0.813597	0.952428	179	0.0231188	0.699084	0.869421	282	0.155481	0.0275243	0.559889	201	0.173154	0.00126315	0.0578678	344
ATP2B4_493	0.0964909	0.16255	0.999491	211	0.0295221	0.543405	0.9244	426	0.00733111	0.922411	0.981719	179	0.0190634	0.749927	0.893942	282	0.0855912	0.227003	0.804172	201	0.0234414	0.664833	0.868994	344
ATP2C1_27032	-0.00386719	0.955469	0.999491	211	-0.00131082	0.978479	0.999087	426	-0.0583043	0.43819	0.809678	179	-0.0306866	0.607848	0.814078	282	-0.000426857	0.995202	0.999723	201	0.00486057	0.928428	0.974453	344
ATP2C2_9914	0.0695485	0.314672	0.999491	211	0.057398	0.237136	0.822159	426	-0.0547361	0.468041	0.825604	178	0.0132711	0.824408	0.929674	282	-0.052347	0.616318	0.941326	94	-0.130665	0.109785	0.417263	151
ATP4A_495	-0.0669608	0.333059	0.999491	211	-0.111167	0.021743	0.53655	426	0.0141487	0.85131	0.964527	178	0.0477326	0.424603	0.694038	282	0.0460653	0.516106	0.919171	201	0.0184722	0.73281	0.897898	344
ATP4B_496	0.0569996	0.410099	0.999491	211	0.0484519	0.318433	0.85454	426									-0.0414843	0.671376	0.952451	107	0.0657888	0.363342	0.688665	193
ATP5A1_498									-0.138152	0.0651467	0.455341	179	-0.114024	0.0558095	0.257421	282	0.00672173	0.92455	0.989814	201	0.0123781	0.819061	0.93437	344
ATP5B_506									-0.196205	0.0086695	0.240903	178	-0.222937	0.000160177	0.013698	282	0.000943616	0.989393	0.998413	201	-0.00267724	0.960541	0.987612	344
ATP5C1_509																	0.0668414	0.345791	0.859032	201	-0.00277171	0.95915	0.987287	344
ATP5D_513																	0.150077	0.0334614	0.587166	201	0.178745	0.000868398	0.0506988	344
ATP5E_514																	-0.0283404	0.689621	0.954452	201	0.0227854	0.673665	0.87313	344
ATP5F1A_498	0.105741	0.125734	0.999491	211	-0.00650181	0.893558	0.987818	426
ATP5F1B_506	0.00411729	0.952592	0.999491	211	0.0178225	0.713768	0.962171	426
ATP5F1C_509	0.0224253	0.74605	0.999491	211	0.0215553	0.657302	0.952378	426
ATP5F1D_513	-0.0638415	0.35612	0.999491	211	-0.0517409	0.286651	0.845391	426
ATP5F1E_514	-0.0242223	0.72648	0.999491	211	-0.0539833	0.26625	0.834392	426
ATP5F1_515																	0.124975	0.0771077	0.665116	201	0.118864	0.0274961	0.219944	344
ATP5G1_516																	0.0172994	0.807425	0.974186	201	-0.074052	0.17058	0.509006	344
ATP5G2_517																	0.072752	0.30472	0.847853	201	-0.0555721	0.304066	0.642236	344
ATP5G3_518																	0.0464067	0.512997	0.918947	201	0.124923	0.0204695	0.192185	344
ATP5H_10476																	-0.0168733	0.812079	0.974879	201	-0.119188	0.0270738	0.218508	344
ATP5IF1_93974	0.0206202	0.765873	0.999491	211	0.0268186	0.580946	0.936992	426
ATP5I_521																	0.0927153	0.190504	0.782928	201	-0.0335553	0.535081	0.803125	344
ATP5J2-PTCD1_100526740									-0.0817025	0.276919	0.705003	179	-0.0508937	0.394544	0.672985	282	-0.110413	0.128366	0.723021	191	-0.146562	0.00756664	0.123687	331
ATP5J2_9551									-0.244649	0.000964946	0.116598	179	-0.205623	0.000511109	0.0256007	282	-0.00288846	0.967538	0.994536	201	-0.0806159	0.135649	0.459523	344
ATP5J_522																	0.0022428	0.974792	0.99606	201	-0.0630194	0.243719	0.586627	344
ATP5L_10632																	-0.0250774	0.723809	0.960132	201	0.0321209	0.552687	0.813343	344
ATP5MC1_516	-0.00242522	0.972065	0.999491	211	0.0199604	0.681213	0.955608	426
ATP5MC2_517	-0.00899403	0.896667	0.999491	211	0.00820681	0.865882	0.984977	426
ATP5MC3_518	-0.0638174	0.356302	0.999491	211	-0.0435815	0.369561	0.872534	426
ATP5MD_84833	0.0550865	0.426015	0.999491	211	-0.0170162	0.726185	0.963663	426
ATP5ME_521	0.0412405	0.551344	0.999491	211	-0.0528048	0.276845	0.839991	426
ATP5MF_9551	-0.0431771	0.532793	0.999491	211	-0.0560525	0.248329	0.823083	426
ATP5MGL_267020	-0.0401755	0.561678	0.999491	211	-0.00413265	0.932224	0.990865	426
ATP5MG_10632	0.0200045	0.772669	0.999491	211	-0.0208432	0.667937	0.953758	426
ATP5MPL_9556	0.0181904	0.792795	0.999491	211	-0.0946219	0.0509839	0.645003	426
ATP5O_539									-0.0860087	0.253649	0.691694	178	-0.122934	0.0391054	0.215291	282	0.0168202	0.812659	0.974962	201	-0.046233	0.392645	0.711663	344
ATP5PB_515	-0.0466529	0.500303	0.999491	211	-0.0255654	0.598749	0.939141	426
ATP5PD_10476	0.0280143	0.685776	0.999491	211	0.0192075	0.692615	0.957718	426
ATP5PF_522	0.015358	0.824489	0.999491	211	-0.0138889	0.775005	0.97038	426
ATP5PO_539	-0.0246726	0.721604	0.999491	211	-0.0201274	0.678694	0.955056	426
ATP5S_27109	0.0653366	0.344945	0.999491	211	0.026002	0.592519	0.939141	426									0.0492707	0.487307	0.911901	201	-0.0392744	0.467802	0.762525	344
ATP6AP1L_92270	0.0289988	0.67535	0.999491	211	0.0221525	0.648436	0.950915	426									-0.142205	0.143978	0.738173	107	-0.0869955	0.228972	0.57169	193
ATP6AP1_537	-0.0147096	0.831786	0.999491	211	0.107323	0.0267586	0.564422	426	0.188947	0.0115402	0.262131	178	0.09337	0.117723	0.379442	282	-0.0762765	0.281824	0.835562	201	0.0248936	0.645446	0.860202	344
ATP6AP2_10159	0.0111282	0.872337	0.999491	211	0.0761233	0.116688	0.730259	426									0.0741867	0.295256	0.843265	201	0.0392665	0.467892	0.762525	344
ATP6V0A1_535	0.0646664	0.349926	0.999491	211	0.0663205	0.171838	0.780767	426									0.135823	0.0545391	0.627514	201	0.186441	0.000509117	0.0389509	344
ATP6V0A2_23545	-0.0372377	0.590659	0.999491	211	-0.0488937	0.314035	0.851691	426
ATP6V0A4_50617	-0.0683544	0.323073	0.999491	211	-0.0317293	0.513675	0.921949	426									0.0974297	0.168832	0.765157	201	0.0527436	0.329379	0.661982	344
ATP6V0B_533	0.0950488	0.168952	0.999491	211	0.0515517	0.28842	0.846307	426									0.0483545	0.49545	0.915772	201	0.107432	0.0464725	0.279285	344
ATP6V0C_527	-0.0443557	0.521658	0.999491	211	-0.0424763	0.381836	0.877883	426	0.106717	0.155074	0.597735	179	0.0371696	0.534187	0.770788	282	0.0592193	0.403676	0.883395	201	0.0823958	0.127198	0.445763	344
ATP6V0D1_9114	0.138891	0.0438725	0.98243	211	0.0340768	0.483006	0.911418	426									0.06618	0.350595	0.860944	201	0.065891	0.222854	0.566264	344
ATP6V0D2_245972	0.0876822	0.204607	0.999491	211	0.00753302	0.876801	0.98639	426									0.105333	0.136703	0.732324	201	0.0453114	0.402159	0.718397	344
ATP6V0E1_8992	-0.0297983	0.666927	0.999491	211	0.0505581	0.297826	0.847156	426	-0.0992566	0.186193	0.628026	179	-0.0723901	0.223926	0.517325	284	-0.109281	0.122518	0.713519	201	-0.0999124	0.0641712	0.322879	344
ATP6V0E2_155066	-0.0750182	0.278029	0.999491	211	0.0129915	0.789189	0.972919	426									-0.0305155	0.667171	0.95161	201	-0.0688334	0.202829	0.548199	344
ATP6V1A_523	-0.0444945	0.520355	0.999491	211	-0.000436222	0.992837	0.999923	426	0.117486	0.118327	0.545884	178	0.0256348	0.668185	0.851107	282	0.113665	0.108134	0.700387	201	0.0200648	0.710764	0.888452	344
ATP6V1B1_525	-0.0726942	0.293229	0.999491	211	0.0162201	0.738517	0.964906	426	-0.0379308	0.614187	0.88414	179	-0.0134616	0.821929	0.929398	282	-0.031016	0.662046	0.949614	201	-0.0197488	0.71512	0.890355	344
ATP6V1B2_526	-0.0418415	0.545553	0.999491	211	0.0343495	0.479509	0.911418	426	0.228489	0.00209546	0.147178	179	0.197336	0.000826272	0.0334493	284	0.0264958	0.708876	0.957192	201	0.122558	0.0230011	0.201987	344
ATP6V1C1_528	-0.0179267	0.795732	0.999491	211	0.0210358	0.665053	0.953758	426									-0.0333014	0.638845	0.945603	201	-0.0158779	0.769187	0.912165	344
ATP6V1C2_245973	0.0424166	0.54004	0.999491	211	0.0776095	0.109699	0.723229	426									-0.0592181	0.403685	0.883395	201	0.0208694	0.699716	0.884951	344
ATP6V1D_51382	0.0147255	0.831607	0.999491	211	0.0706178	0.14565	0.760498	426									-0.0564544	0.426019	0.8904	201	-0.0334198	0.536732	0.803803	344
ATP6V1E1_529	0.0350057	0.613122	0.999491	211	0.0468358	0.334861	0.864464	426									-0.00656823	0.926268	0.989835	201	0.0598203	0.26853	0.611225	344
ATP6V1E2_90423	0.0350441	0.612732	0.999491	211	0.0407296	0.401734	0.884322	426									-0.0866773	0.22114	0.798819	201	-0.0615457	0.254942	0.59666	344
ATP6V1F_9296	-0.0124537	0.857284	0.999491	211	0.0584545	0.228601	0.816262	426									0.0522598	0.461248	0.89979	201	0.0637203	0.238505	0.580498	344
ATP6V1G1_9550	-0.0564904	0.414301	0.999491	211	0.04859	0.317054	0.854212	426									0.0238909	0.736382	0.963682	201	0.0697189	0.197066	0.542677	344
ATP6V1G2-DDX39B_100532737									0.015733	0.834423	0.960654	179	0.142489	0.0166474	0.140304	282	-0.0249848	0.724789	0.960442	201	-0.0974304	0.0711085	0.340162	344
ATP6V1G2_534	0.0998048	0.148529	0.999491	211	0.0864404	0.074716	0.678074	426	-0.156535	0.0363902	0.383761	179	-0.100656	0.0904363	0.332517	284	0.0986693	0.163451	0.761187	201	0.136203	0.0114458	0.146169	344
ATP6V1G3_127124	-0.0326088	0.637654	0.999491	211	-0.0193217	0.69088	0.957697	426									0.0153653	0.828602	0.976513	201	-0.0711988	0.187702	0.531601	344
ATP6V1H_51606	0.0924209	0.181099	0.999491	211	0.0316181	0.515153	0.921952	426									0.059388	0.402335	0.882816	201	0.0771058	0.153574	0.486442	344
ATP7A_538	0.0293025	0.672145	0.999491	211	0.0131024	0.787431	0.972826	426	-0.0382901	0.611845	0.884135	178	-0.00810369	0.892231	0.957162	282	0.137759	0.0511523	0.622796	201	0.112889	0.0363628	0.249389	344
ATP7B_540	-0.0305094	0.65947	0.999491	211	0.0461904	0.341571	0.866932	426	-0.133873	0.0748251	0.469157	178	-0.00183966	0.975464	0.992768	282	-0.0560684	0.429194	0.891226	201	0.0460445	0.394579	0.712636	344
ATP8A1_10396	-0.00447319	0.948499	0.999491	211	0.0652499	0.178878	0.783269	426	-0.115434	0.124939	0.554517	178	-0.181628	0.00219858	0.0533	282	0.0839877	0.235859	0.812419	201	0.100146	0.0635489	0.32168	344
ATP8A2_51761	-0.00609823	0.929832	0.999491	211	0.0204041	0.674528	0.954444	426	0.116881	0.12025	0.548936	178	-0.0388263	0.516111	0.758986	282	0.00862203	0.903312	0.986572	201	0.0413227	0.444892	0.749841	344
ATP8B1_5205	-0.0115014	0.868093	0.999491	211	0.00303346	0.950223	0.993829	426	0.0597605	0.426817	0.803589	179	0.106209	0.0749654	0.301183	282	-0.0514029	0.468638	0.902992	201	-0.0649682	0.229416	0.572004	344
ATP8B2_57198	0.0632177	0.360849	0.999491	211	0.0324087	0.504697	0.919217	426	-0.00880955	0.907091	0.980178	178	0.0043475	0.942058	0.979503	282	-0.0131058	0.853499	0.979813	201	-0.0870092	0.107188	0.412478	344
ATP8B3_148229	-0.07107	0.304176	0.999491	211	-0.0359039	0.45984	0.904162	426	-0.0406183	0.590356	0.876483	178	-0.0925903	0.120834	0.38273	282	0.0688456	0.331488	0.857431	201	0.0832391	0.123338	0.440062	344
ATP8B4_79895	-0.0598444	0.387093	0.999491	211	-0.00732148	0.880235	0.98639	426	-0.0153704	0.838639	0.961536	178	0.0381682	0.523253	0.76391	282	0.0643996	0.363735	0.865423	201	0.033054	0.541202	0.806708	344
ATP8B5P_158381																	0.0361753	0.711437	0.957192	107	0.0187219	0.796079	0.924147	193
ATP9A_10079	-0.0456443	0.509622	0.999491	211	0.0258248	0.595045	0.939141	426	0.0173379	0.817814	0.953845	179	0.00887907	0.881991	0.953876	282	-0.0187472	0.791662	0.971804	201	0.0452689	0.402601	0.718761	344
ATP9B_374868	0.00874058	0.899564	0.999491	211	-0.0512927	0.290852	0.846719	426	-0.0900706	0.230505	0.671804	179	-0.0288177	0.62989	0.829219	282	0.0127783	0.85712	0.97998	201	0.157248	0.00345443	0.0861598	344
ATPAF1_64756	-0.126658	0.0663151	0.987144	211	-0.0598053	0.218007	0.806631	426									-0.137968	0.0507982	0.622687	201	-0.134348	0.0126299	0.153678	344
ATPAF2_91647	-0.0113823	0.869447	0.999491	211	-0.0613218	0.206539	0.801143	426									0.117835	0.0957157	0.684155	201	0.0450468	0.404915	0.720208	344
ATPIF1_93974																	0.0716891	0.463075	0.899834	107	0.0194528	0.788302	0.920638	193
ATRAID_51374	0.0333771	0.629745	0.999491	211	0.0335761	0.489464	0.913442	426									0.236569	0.0141561	0.506665	107	0.125437	0.0821799	0.364541	193
ATRIP_84126	0.094381	0.17198	0.999491	211	0.0484815	0.318137	0.85454	426	-0.13744	0.0665563	0.459791	179	-0.0623912	0.296444	0.591037	282
ATRNL1_26033	-0.0503879	0.466588	0.999491	211	0.060957	0.209258	0.802264	426	-0.108176	0.149473	0.588085	179	-0.065706	0.269764	0.567792	284	-0.00997953	0.888182	0.984775	201	-0.0450651	0.404724	0.720129	344
ATRN_8455	-0.125582	0.068673	0.987144	211	-0.0383632	0.429661	0.891342	426									-0.0113892	0.872512	0.982497	201	0.104449	0.0529305	0.297181	344
ATRX_546	0.0435669	0.530086	0.999491	210	0.0897662	0.0660789	0.666528	420	0.000856926	0.990917	0.997571	179	-0.0861087	0.14778	0.423848	284	0.0847534	0.231601	0.808387	201	0.0874383	0.105461	0.409583	344
ATR_545	0.0348868	0.614329	0.999491	211	-0.0439006	0.366063	0.871144	426	-0.184236	0.0118263	0.264281	186	-0.119261	0.0420578	0.222852	291	-0.0388531	0.58396	0.933029	201	-0.0446034	0.40956	0.722079	344
ATXN10_25814	0.129094	0.06122	0.983399	211	0.100041	0.0390237	0.603793	426									-0.0557379	0.431924	0.891713	201	-0.0478556	0.37623	0.698938	344
ATXN1L_342371	0.0142259	0.837239	0.999491	211	-0.0418831	0.388524	0.879417	426
ATXN1_6310	0.0910088	0.187885	0.999491	211	0.150034	0.00190169	0.284766	426									-0.0953189	0.178297	0.779922	201	-0.0907025	0.0930311	0.388858	344
ATXN2L_11273	0.120415	0.0809685	0.991144	211	0.0263379	0.587746	0.938995	426									-0.0150436	0.877773	0.983113	107	-0.0848261	0.240835	0.583109	193
ATXN2_6311	0.0584739	0.398077	0.999491	211	-0.0113121	0.815916	0.977154	426									-0.0508122	0.603225	0.937818	107	-0.0575065	0.426978	0.736442	193
ATXN3L_92552	-0.100287	0.146568	0.999491	211	0.0391785	0.419914	0.887513	426
ATXN3_4287	0.153619	0.0256511	0.98243	211	0.0945953	0.0510493	0.645003	426	-0.0042938	0.954509	0.989285	179	0.00309208	0.958625	0.986093	284	-0.0874458	0.348495	0.860453	117	-0.05285	0.450578	0.75366	206
ATXN7L1_222255	-0.0469277	0.497779	0.999491	211	-0.0674526	0.16462	0.776407	426									-0.14949	0.124336	0.7154	107	-0.0678221	0.348669	0.677014	193
ATXN7L2_127002	0.0728896	0.291931	0.999491	211	-0.034192	0.481528	0.911418	426									-0.142405	0.143409	0.737328	107	-0.0682456	0.345661	0.674142	193
ATXN7L3B_552889	-0.0471136	0.496076	0.999491	211	0.0768913	0.113034	0.726779	426
ATXN7L3_56970	0.0920378	0.183975	0.999491	210	0.0277305	0.570903	0.933453	420
ATXN7_6314	0.0657444	0.343096	0.999491	210	0.012846	0.792943	0.973374	420									-0.108759	0.124326	0.7154	201	-0.162688	0.00247302	0.0759509	344
AUH_549	0.102276	0.138687	0.999491	211	-0.00567915	0.906961	0.9898	426	-0.133989	0.0737487	0.468269	179	-0.160406	0.00695057	0.0970767	282	0.0362382	0.609541	0.94006	201	0.0496986	0.358103	0.684856	344
AUNIP_79000	-0.0459491	0.506796	0.999491	211	-0.0379019	0.435233	0.893091	426
AUP1_550	0.150573	0.0287652	0.98243	211	0.116224	0.0163982	0.496625	426									0.0423748	0.550315	0.925568	201	0.155558	0.00382439	0.0888733	344
AURKAIP1_54998	-0.065228	0.345749	0.999491	211	-0.0289958	0.550618	0.926007	426									-0.0885533	0.211268	0.796963	201	-0.023618	0.662463	0.867967	344
AURKAPS1_6791									0.0447452	0.544227	0.85976	186	0.0475368	0.419158	0.691264	291	0.112545	0.111676	0.700846	201	0.189873	0.000398516	0.0333891	344
AURKA_6790	-0.0980133	0.155991	0.999491	211	-0.080887	0.0954514	0.703317	426	-0.191532	0.00882325	0.242639	186	-0.139913	0.0169297	0.141673	291	0.0663662	0.349238	0.860639	201	-0.0388133	0.473048	0.764976	344
AURKB_9212	-0.0528101	0.446505	0.999491	210	-0.0384642	0.431737	0.891816	420	-0.0362069	0.62369	0.885002	186	-0.0139788	0.812311	0.924794	291	0.0620703	0.381381	0.872896	201	-0.0105849	0.844914	0.943777	344
AURKC_6795	-0.118845	0.0857887	0.999416	210	-0.0618332	0.206001	0.801143	420	-0.0545261	0.469753	0.825899	178	-0.0208822	0.726975	0.884054	282	0.0566078	0.436673	0.892904	191	-0.0162478	0.768373	0.911855	331
AUTS2_26053	-0.0278771	0.687234	0.999491	211	-0.0326063	0.502101	0.917927	426									0.127658	0.190072	0.782928	107	0.0830478	0.250875	0.593316	193
AVEN_57099	0.0597367	0.387949	0.999491	211	0.0763806	0.115454	0.730259	426									0.0292111	0.765187	0.968321	107	0.0624146	0.388522	0.708191	193
AVIL_10677	-0.103664	0.133378	0.999491	211	-0.0628688	0.195297	0.795425	426									-0.024184	0.73327	0.963044	201	-0.0521554	0.334808	0.665449	344
AVL9_23080	0.0230028	0.739743	0.999491	211	0.0151757	0.754797	0.966249	426									-0.0279844	0.77478	0.969689	107	0.112942	0.117852	0.431233	193
AVPI1_60370	-0.0472604	0.494733	0.999491	211	0.00676559	0.889267	0.987365	426									-0.0998514	0.306166	0.848403	107	-0.0205689	0.776467	0.915403	193
AVPR1A_552	-0.0131223	0.84971	0.999491	211	-0.0434682	0.370808	0.873419	426	-0.0311468	0.67895	0.905448	179	-0.0623282	0.296933	0.591123	282	-0.0483352	0.495622	0.915772	201	-0.0238983	0.658708	0.866704	344
AVPR1B_553	0.0388847	0.574327	0.999491	211	0.0559039	0.249587	0.824027	426	-0.16548	0.0268458	0.339941	179	-0.150244	0.0115311	0.120378	282	0.0434428	0.540303	0.925568	201	0.0706327	0.191245	0.535837	344
AVPR2_554	-0.0673072	0.330558	0.999491	211	-0.0065272	0.893145	0.987818	426	0.123621	0.100176	0.5225	178	0.0517817	0.386336	0.666348	282	-0.0998967	0.158251	0.75348	201	-0.0703001	0.193349	0.538762	344
AVP_551	-0.0557281	0.420638	0.999491	211	0.0189958	0.695833	0.957852	426									0.00306965	0.965503	0.994105	201	-0.0570319	0.29152	0.631157	344
AWAT1_158833	-0.0255826	0.711784	0.999491	211	-0.110302	0.0227942	0.538356	426									0.0359556	0.612335	0.940122	201	-0.0433423	0.422941	0.733566	344
AWAT2_158835	-0.0535721	0.438864	0.999491	211	-0.0198311	0.683166	0.955977	426									0.0471417	0.506338	0.917827	201	-0.00463355	0.931763	0.975901	344
AXDND1_126859	0.122545	0.0757001	0.987144	211	-0.0262405	0.589128	0.939141	426									-0.124253	0.202262	0.78865	107	-0.0830997	0.250578	0.592937	193
AXIN1_8312	0.0895571	0.195055	0.999491	211	0.0329031	0.498215	0.916411	426	-0.145044	0.0527195	0.42684	179	-0.177326	0.00270891	0.0591878	284	0.0773582	0.275036	0.83408	201	0.038304	0.478879	0.768692	344
AXIN2_8313	0.0343968	0.620157	0.999491	210	0.0266347	0.586222	0.938483	420									0.0200454	0.7776	0.970228	201	0.0393908	0.466482	0.761859	344
AXL_558	-0.129683	0.0600386	0.983399	211	-0.0329401	0.497732	0.916411	426	-0.011047	0.881041	0.972286	186	0.0638225	0.277855	0.57362	291	-0.119228	0.0918304	0.680687	201	-0.184058	0.000602035	0.0436671	344
AZGP1_563	-0.0555121	0.422444	0.999491	211	-0.133207	0.00589501	0.385866	426	-0.0866114	0.24898	0.688096	179	-0.0232004	0.698073	0.869421	282	0.0550988	0.43723	0.89328	201	-0.0164982	0.760441	0.909389	344
AZI2_64343	0.0306583	0.657913	0.999491	211	-0.00123043	0.979799	0.999117	426									-0.0215884	0.760979	0.967879	201	0.00245212	0.963857	0.988592	344
AZIN1_51582	0.0762117	0.270433	0.999491	211	0.0123081	0.800036	0.974808	426									-0.0280807	0.692321	0.95463	201	0.0223663	0.679333	0.87593	344
AZIN2_113451	0.0882217	0.201824	0.999491	211	-0.00988541	0.838793	0.979889	426									0.00603895	0.932195	0.990322	201	-0.0363307	0.501836	0.78137	344
AZU1_566	0.0725521	0.294177	0.999491	211	0.106659	0.027719	0.56879	426									0.0404008	0.569058	0.93105	201	-0.0445171	0.410467	0.722869	344
B2M_567	0.094587	0.171042	0.999491	211	0.0279376	0.565262	0.93175	426	0.153872	0.0397338	0.389763	179	0.0589884	0.321896	0.612824	284	0.0420681	0.553207	0.926157	201	-0.0375653	0.487405	0.773656	344
B3GALNT1_8706	0.012175	0.860445	0.999491	211	0.0348896	0.472624	0.908823	426									-0.0717574	0.311396	0.850078	201	-0.068168	0.207239	0.552399	344
B3GALNT2_148789	-0.0228317	0.74161	0.999491	211	-0.0406672	0.402457	0.884322	426									0.00753314	0.915474	0.989812	201	-0.0181765	0.736928	0.899943	344
B3GALT1_8708	-0.0112818	0.87059	0.999491	211	0.0378595	0.435747	0.893345	426									-0.118886	0.0927713	0.681865	201	-0.0271996	0.615151	0.844683	344
B3GALT2_8707	0.0556039	0.421676	0.999491	211	-0.037781	0.436701	0.894279	426									0.103447	0.143909	0.738173	201	-0.036263	0.502634	0.781771	344
B3GALT4_8705	0.105505	0.126582	0.999491	211	0.0856119	0.0775538	0.682598	426									0.111823	0.114008	0.700846	201	0.052541	0.331243	0.662921	344
B3GALT5_10317	0.0257291	0.710207	0.999491	211	0.00813245	0.867086	0.984977	426									0.0177116	0.802929	0.97336	201	0.00507599	0.925265	0.973416	344
B3GALT6_126792	0.0096785	0.888852	0.999491	211	-0.00399854	0.934419	0.991335	426	0.0704763	0.348517	0.756541	179	0.111874	0.0606232	0.269342	282	-0.0369725	0.602308	0.937626	201	0.0176191	0.744711	0.90398	344
B3GAT1_27087	-0.00753738	0.913331	0.999491	211	-0.0351759	0.468996	0.907959	426									-0.123917	0.203496	0.790844	107	0.0305934	0.672766	0.872928	193
B3GAT2_135152	-0.00396142	0.954385	0.999491	211	-0.0971249	0.0451253	0.626987	426									0.0273402	0.700038	0.956216	201	0.147417	0.00615873	0.114022	344
B3GAT3_26229	-0.0518083	0.454104	0.999491	211	-0.0249701	0.607292	0.941539	426									-0.126077	0.0745171	0.665116	201	-0.153762	0.0042565	0.0943356	344
B3GLCT_145173	-0.103742	0.133084	0.999491	211	0.0431671	0.374134	0.874968	426	-0.0382191	0.612506	0.884135	178	-0.0748427	0.210206	0.502282	282	-0.153844	0.0292197	0.562199	201	-0.156849	0.00353873	0.0865873	344
B3GNT2_10678	-0.0617554	0.372086	0.999491	211	0.0229356	0.636886	0.948147	426	-0.0369713	0.624168	0.885404	178	0.0506534	0.396783	0.673713	282	-0.0704744	0.320148	0.855742	201	0.0114548	0.83235	0.93881	344
B3GNT3_10331	0.00251218	0.971063	0.999491	211	-0.00380109	0.93765	0.991867	426									0.0867933	0.22052	0.798819	201	-0.00849961	0.875187	0.955288	344
B3GNT4_79369	0.110371	0.109909	0.999491	211	0.0388917	0.423328	0.888664	426									0.156586	0.026429	0.555239	201	0.136616	0.0111959	0.144926	344
B3GNT5_84002	-0.0284859	0.680774	0.999491	211	0.0785755	0.105335	0.714821	426									0.11157	0.114832	0.702158	201	0.195439	0.000265441	0.0286777	344
B3GNT6_192134	-0.0318254	0.64576	0.999491	211	0.0296015	0.542321	0.9244	426									0.0337794	0.634036	0.944441	201	-0.00899448	0.867985	0.953569	344
B3GNT7_93010	0.013834	0.841663	0.999491	211	-0.0491239	0.31176	0.851035	426	-0.0251005	0.73874	0.930132	179	0.102438	0.085959	0.324892	282	0.137047	0.0523778	0.624356	201	0.137175	0.0108649	0.143517	344
B3GNT8_374907	-0.114847	0.0961433	0.999491	211	-0.00457799	0.924941	0.990242	426									-0.0266751	0.706996	0.957153	201	-0.052406	0.332488	0.66368	344
B3GNT9_84752	0.101673	0.14104	0.999491	211	0.0305828	0.529012	0.92284	426
B3GNTL1_146712	0.0755371	0.274709	0.999491	211	0.0594431	0.220813	0.808591	426									-0.0534936	0.584217	0.933132	107	-0.0887985	0.219431	0.562425	193
B4GALNT1_2583	0.0661156	0.339211	0.999491	211	0.00295309	0.951541	0.994386	426									-0.0832374	0.240085	0.814497	201	-0.0700471	0.19496	0.540911	344
B4GALNT2_124872	-0.0469008	0.498025	0.999491	211	0.0396135	0.414769	0.886001	426									0.009997	0.887987	0.984775	201	-0.0413322	0.444787	0.749815	344
B4GALNT3_283358	0.0475371	0.492207	0.999491	211	0.016829	0.729079	0.964022	426	-0.0345299	0.647256	0.895119	178	-0.144521	0.0151448	0.1342	282	0.103581	0.143388	0.737328	201	-0.0153504	0.77665	0.915435	344
B4GALNT4_338707	-0.0304945	0.659626	0.999491	211	0.0147795	0.761002	0.967047	426									0.0363685	0.608254	0.939872	201	0.0191079	0.723983	0.894172	344
B4GALT1_2683	0.0334288	0.629215	0.999491	211	0.094048	0.0524129	0.648988	426									-0.0741324	0.295611	0.843265	201	-0.0165394	0.75986	0.909389	344
B4GALT2_8704	-0.0611319	0.376942	0.999491	211	-0.0333228	0.492748	0.915178	426									0.0113745	0.872676	0.982497	201	-0.0203931	0.706249	0.887047	344
B4GALT3_8703	-0.0863559	0.211564	0.999491	211	-0.0506049	0.297378	0.847156	426									-0.0552523	0.435952	0.892531	201	0.0121154	0.822838	0.935328	344
B4GALT4_8702	-0.0580495	0.401517	0.999491	211	-0.0183956	0.704987	0.960253	426									-0.0211749	0.765423	0.968321	201	-0.0520005	0.336247	0.666498	344
B4GALT5_9334	0.0727887	0.292601	0.999491	211	0.091612	0.0588557	0.652237	426									0.0102865	0.884765	0.984124	201	0.0492287	0.362672	0.688542	344
B4GALT6_9331	-0.0548481	0.428023	0.999491	211	0.0122498	0.800965	0.974871	426									-0.00815016	0.90858	0.988144	201	-0.0210895	0.696706	0.883818	344
B4GALT7_11285	0.0949277	0.169498	0.999491	211	0.0159763	0.742308	0.964906	426									0.0981705	0.165601	0.762625	201	0.17716	0.000966848	0.0523512	344
B4GAT1_11041	0.047497	0.492573	0.999491	211	0.0476397	0.326622	0.858974	426									-0.0301507	0.670916	0.95224	201	-0.026569	0.623374	0.848967	344
B9D1_27077	-0.0242552	0.726125	0.999491	211	0.0574889	0.236393	0.822159	426	-0.101681	0.175613	0.616861	179	-0.0499966	0.401263	0.677186	284	0.00543803	0.955668	0.992903	107	0.0378816	0.600949	0.839027	193
B9D2_80776	-0.14268	0.038373	0.98243	211	-0.0667756	0.168909	0.779338	426
BAALC_79870	0.105835	0.125394	0.999491	211	0.0571599	0.23909	0.822159	426									0.0829771	0.395488	0.881244	107	-0.0142196	0.844398	0.943615	193
BAAT_570	-0.06033	0.383245	0.999491	211	0.0603428	0.213892	0.804004	426									-0.0117145	0.868904	0.981704	201	-0.0364021	0.500995	0.78098	344
BABAM1_29086	0.0516898	0.456222	0.999491	210	0.00711077	0.884478	0.987179	420
BABAM2_9577	0.00386932	0.955551	0.999491	210	-0.0305779	0.532012	0.923065	420									-0.0187092	0.792075	0.971804	201	0.0111283	0.837061	0.940641	344
BACE1_23621	-0.0363162	0.599888	0.999491	211	0.0081065	0.867506	0.984977	426									0.0565928	0.424884	0.890115	201	-0.0171564	0.751191	0.906525	344
BACE2_25825	0.0803276	0.245328	0.999491	211	0.01509	0.756137	0.966322	426									-0.0136178	0.847844	0.979163	201	0.0374763	0.488438	0.773881	344
BACH1_571	0.0135795	0.844539	0.999491	211	0.0675867	0.163781	0.775555	426	-0.0795217	0.289987	0.716877	179	-0.0717871	0.229477	0.522603	282	0.0676919	0.339675	0.858514	201	0.0361373	0.504118	0.782552	344
BACH2_60468	0.0088444	0.898377	0.999491	211	0.00780743	0.872351	0.985543	426	-0.0544227	0.469335	0.825899	179	-0.0384261	0.518959	0.760517	284	0.162969	0.0208026	0.532941	201	0.0548621	0.310296	0.646476	344
BAD_572	-0.086243	0.212165	0.999491	211	0.00133507	0.978081	0.999087	426	-0.0743852	0.323742	0.744424	178	-0.00908873	0.879226	0.952653	282	0.0521466	0.462221	0.89979	201	0.0366233	0.498396	0.779194	344
BAG1_573	-0.15352	0.0257475	0.98243	211	-0.0218689	0.652641	0.951663	426									-0.116134	0.100638	0.689251	201	0.0594853	0.271224	0.613276	344
BAG2_9532	0.0523223	0.449632	0.999491	211	0.0485313	0.317639	0.854264	426									-0.0534204	0.451342	0.897329	201	-0.0276402	0.609435	0.842593	344
BAG3_9531	-0.0511496	0.45987	0.999491	211	-0.0225754	0.642189	0.948917	426	-0.0323245	0.667519	0.900847	179	-0.0526973	0.376282	0.657072	284	0.00066546	0.992519	0.999215	201	-0.0866763	0.108543	0.415312	344
BAG4_9530	-0.0447466	0.517991	0.999491	211	0.0173902	0.720417	0.962684	426									-0.0320263	0.651748	0.947897	201	-0.0108741	0.840733	0.942559	344
BAG5_9529	0.00722445	0.916916	0.999491	211	-0.00553145	0.90937	0.98998	426									0.0224051	0.752226	0.966272	201	-0.0661987	0.220697	0.564115	344
BAG6_7917	0.1431	0.0382645	0.98243	210	0.0979888	0.0447474	0.626783	420	-0.024489	0.745582	0.932346	178	0.0962685	0.106703	0.361954	282	0.0547365	0.440255	0.893902	201	0.150572	0.00513398	0.103211	344
BAGE2_85319																	-0.134924	0.165864	0.762625	107	0.142442	0.048143	0.283581	193
BAGE3_85318																	0.0884026	0.365212	0.865659	107	-0.0534356	0.460481	0.758751	193
BAGE4_85317									0.0705766	0.34783	0.755843	179	0.000131589	0.998238	0.999295	284	-0.28171	0.00328657	0.377726	107	-0.299775	2.28168e-05	0.00992154	193
BAGE5&BAGE3_85316&85318									-0.0314413	0.676085	0.904812	179	-0.0190143	0.749689	0.893942	284
BAGE5_85316																	-0.0192327	0.84412	0.978062	107	0.0138211	0.848706	0.945805	193
BAGE_574																	0.103702	0.287795	0.839513	107	-0.0398088	0.582548	0.829559	193
BAHD1_22893	0.0205159	0.767566	0.999491	210	-0.00360727	0.941244	0.992689	420									0.0390909	0.689331	0.954452	107	-0.0205197	0.776988	0.915435	193
BAIAP2-AS1_440465																	0.0173353	0.859332	0.979988	107	0.0324385	0.654269	0.864416	193
BAIAP2L1_55971	-0.0237392	0.731725	0.999491	211	-0.0295303	0.543294	0.9244	426									0.00907578	0.898251	0.985412	201	0.014225	0.792637	0.922458	344
BAIAP2L2_80115	0.0385037	0.578086	0.999491	211	0.00100036	0.983575	0.999574	426									0.0242921	0.803852	0.973361	107	0.108019	0.13484	0.45856	193
BAIAP2_10458	0.0103098	0.881653	0.999491	211	0.0806948	0.0962441	0.703447	426	-0.128657	0.0860888	0.494751	179	-0.0751404	0.206773	0.49887	284	-0.0834454	0.238909	0.814497	201	0.017205	0.75051	0.906291	344
BAIAP3_8938	0.0146558	0.832393	0.999491	211	0.0309697	0.52381	0.922355	426									-0.206092	0.0331952	0.587166	107	-0.0384377	0.595612	0.836709	193
BAK1_578	0.086179	0.212505	0.999491	211	0.0527081	0.277726	0.840705	426									0.0348726	0.623094	0.942143	201	0.113023	0.0361391	0.249181	344
BAMBI_25805	0.0624978	0.366354	0.999491	211	0.0693725	0.152904	0.766757	426									0.234808	0.0149133	0.506665	107	0.107028	0.138477	0.463758	193
BANF1_8815	0.00708572	0.918701	0.999491	210	-0.08057	0.0991569	0.70685	420									0.00835709	0.931918	0.990322	107	0.120786	0.0942798	0.391392	193
BANF2_140836	0.0636187	0.357804	0.999491	211	0.0916443	0.0587663	0.652237	426									-0.000112791	0.99908	0.999827	107	0.0015333	0.983116	0.99401	193
BANK1_55024	-0.003671	0.957726	0.999491	211	-0.0557883	0.250568	0.82531	426	0.139787	0.0620002	0.44745	179	0.00130133	0.982643	0.99484	282	-0.0406501	0.677614	0.953169	107	-0.0576959	0.425454	0.735112	193
BANP_54971	0.122781	0.0758362	0.987144	210	-0.00518369	0.915647	0.990242	420
BAP1_8314	-0.0329752	0.634692	0.999491	210	0.00891703	0.855423	0.983879	420	-0.13537	0.0707997	0.466627	179	-0.10656	0.074005	0.298799	282	-0.03746	0.597527	0.937095	201	0.00782932	0.884959	0.958524	344
BARD1_580	-0.137701	0.0457309	0.98243	211	-0.11893	0.0140418	0.489275	426	-0.13739	0.0666568	0.459851	179	-0.0698306	0.242455	0.535765	282	-0.145686	0.0390561	0.60281	201	-0.170775	0.0014765	0.0612962	344
BARHL1_56751	-0.0180308	0.794573	0.999491	211	0.0284916	0.557572	0.927908	426	0.14376	0.0548717	0.435859	179	0.0399891	0.502091	0.750126	284	-0.162851	0.020896	0.532991	201	-0.216661	5.07658e-05	0.0123167	344
BARHL2_343472	-0.0533262	0.440971	0.999491	211	0.0117668	0.808658	0.976608	426	-0.0789498	0.293481	0.718874	179	-0.11754	0.0478225	0.238725	284	-0.0240692	0.734489	0.96309	201	-0.0185888	0.731188	0.897185	344
BARX1_56033	0.0299129	0.665723	0.999491	211	-0.00306131	0.949767	0.993829	426	-0.0902187	0.229736	0.670624	179	-0.0379416	0.524247	0.764969	284	-0.131807	0.0691274	0.659584	191	-0.12173	0.0267909	0.217586	331
BARX2_8538	0.0414463	0.549358	0.999491	211	0.03468	0.475289	0.909469	426	-0.203334	0.00633456	0.214384	179	-0.171742	0.00369518	0.0685209	284	0.00631908	0.929058	0.990322	201	0.0748957	0.165747	0.502369	344
BASP1_10409	0.129807	0.0604084	0.983399	210	0.10561	0.0304674	0.576022	420									0.080145	0.411868	0.885568	107	0.0439922	0.543531	0.807417	193
BATF2_116071	0.0104493	0.880065	0.999491	211	0.10014	0.038829	0.603793	426									-0.0602675	0.39539	0.881244	201	0.107284	0.0467758	0.280586	344
BATF3_55509	0.152514	0.026746	0.98243	211	0.0596292	0.219368	0.808591	426	-0.0659475	0.380437	0.775297	179	-0.106923	0.0720016	0.294651	284	0.0537227	0.448781	0.895659	201	0.0661656	0.220928	0.564404	344
BATF_10538	0.0137485	0.84263	0.999491	211	-0.0140988	0.771697	0.969911	426	-0.0249573	0.740178	0.930829	179	-0.0225741	0.704839	0.872976	284	0.0389164	0.583347	0.933029	201	-0.0494621	0.360398	0.686608	344
BAX_581	0.0670171	0.332652	0.999491	211	-0.0365914	0.451287	0.899742	426	-0.0953523	0.204197	0.645586	179	-0.131227	0.0270155	0.178057	284	0.00343871	0.961359	0.993331	201	0.0596405	0.269974	0.6128	344
BAZ1A_11177	0.0813194	0.240659	0.999491	210	0.114143	0.0192885	0.518528	420	0.117575	0.117006	0.545049	179	0.0914781	0.124038	0.38704	284	0.15979	0.0234598	0.542976	201	0.170742	0.00147966	0.0612962	344
BAZ1B_9031	-0.00851826	0.902339	0.999491	210	0.0408523	0.403675	0.885033	420	0.11236	0.134268	0.569567	179	0.0846716	0.154686	0.433304	284	-0.209588	0.00282531	0.361342	201	-0.102	0.0587764	0.313032	344
BAZ2A_11176	-0.0656598	0.343718	0.999491	210	0.0170816	0.727051	0.963663	420	-0.100421	0.181054	0.621649	179	-0.197651	0.000810224	0.032967	284	-0.0596357	0.400372	0.882712	201	-0.056742	0.293984	0.633107	344
BAZ2B_29994	0.00295723	0.966021	0.999491	210	-0.0335583	0.492786	0.915178	420	-0.111715	0.128996	0.561235	186	-0.245786	2.23555e-05	0.00636731	291	0.00954946	0.892971	0.984775	201	0.00439926	0.935205	0.977368	344
BBC3_27113	-0.032972	0.63391	0.999491	211	-0.0454288	0.349599	0.868544	426	0.0995294	0.18498	0.626072	179	-0.0177827	0.765412	0.901649	284	-0.0271492	0.702034	0.956216	201	-0.154902	0.0039775	0.0909182	344
BBIP1_92482	0.0573889	0.406904	0.999491	211	0.0269757	0.578732	0.936505	426
BBOF1_80127	0.0130307	0.850747	0.999491	211	-0.0366283	0.45083	0.899519	426
BBOX1_8424	-0.12302	0.0752643	0.987144	210	-0.0673013	0.1686	0.779303	420	-0.0940388	0.210528	0.65431	179	-0.150003	0.0113712	0.120378	284	-0.000966771	0.989132	0.998413	201	0.112745	0.0366035	0.2503	344
BBS10_79738	0.144603	0.0358127	0.98243	211	-0.00253997	0.958313	0.995475	426
BBS12_166379	-0.0142317	0.837174	0.999491	211	0.000266477	0.995625	0.999946	426									-0.11936	0.220744	0.798819	107	0.0135366	0.851784	0.947541	193
BBS1_582	0.0847988	0.219947	0.999491	211	0.114029	0.0185574	0.509457	426									0.0503117	0.478143	0.906664	201	0.0624884	0.247723	0.590736	344
BBS2_583	0.0684413	0.322457	0.999491	211	0.0141557	0.770802	0.969695	426									-0.0121672	0.863886	0.980717	201	0.0151744	0.779143	0.916687	344
BBS4_585	-0.048205	0.486139	0.999491	211	0.0530985	0.274178	0.838392	426									0.109472	0.121863	0.711519	201	0.0742363	0.169515	0.50761	344
BBS5_129880	0.0311934	0.65233	0.999491	211	0.010846	0.823374	0.978148	426									0.014118	0.88524	0.984174	107	-0.0388522	0.591649	0.834716	193
BBS7_55212	-0.0366627	0.59641	0.999491	211	0.0841545	0.0827579	0.685422	426									0.0487196	0.492197	0.914274	201	0.0589427	0.275628	0.616328	344
BBS9_27241	-0.0672653	0.33086	0.999491	211	-0.045159	0.352472	0.868967	426									0.0978689	0.315917	0.852714	107	0.00101451	0.988828	0.996201	193
BBX_56987	-0.0463326	0.503252	0.999491	211	0.0290407	0.550001	0.926007	426									0.0634629	0.37077	0.868967	201	-0.0208712	0.699693	0.884951	344
BCAM_4059	-0.00815626	0.906246	0.999491	211	-0.0804313	0.0973393	0.704508	426	-0.142376	0.0572745	0.43966	179	-0.0994866	0.0954385	0.342417	282	-0.118174	0.2254	0.803016	107	-0.114127	0.114023	0.424735	193
BCAN_63827	0.0491585	0.477546	0.999491	211	0.0732648	0.131106	0.746263	426	-0.0117852	0.875579	0.972189	179	0.0547154	0.359964	0.64438	282	0.0460371	0.637735	0.94473	107	0.0903658	0.211371	0.556348	193
BCAP29_55973	0.0453402	0.512449	0.999491	211	-0.0548875	0.258313	0.828694	426									-0.0632878	0.372094	0.87012	201	-0.0768565	0.154912	0.48819	344
BCAP31_10134	-0.108125	0.117379	0.999491	211	0.0165788	0.732953	0.964022	426
BCAR1_9564	-0.0284213	0.681458	0.999491	211	-0.0576574	0.23502	0.822159	426	-0.00880233	0.906904	0.980178	179	0.0698505	0.240642	0.533585	284	-0.00949821	0.893542	0.984775	201	0.0310169	0.566427	0.8215	344
BCAR3_8412	-0.00964164	0.889273	0.999491	211	-0.00613339	0.899557	0.989035	426	0.0968449	0.197171	0.641807	179	0.129822	0.0287118	0.184213	284	0.0804548	0.25622	0.82452	201	0.00599111	0.911842	0.967998	344
BCAS1_8537	0.0402096	0.561345	0.999491	211	-0.0392881	0.418615	0.886538	426									0.137258	0.158596	0.753625	107	0.0332993	0.645709	0.860202	193
BCAS2_10286	-0.0164528	0.812201	0.999491	211	0.0875707	0.0709811	0.673555	426									-0.154781	0.0282388	0.561491	201	-0.103449	0.0552562	0.302753	344
BCAS3_54828	-0.0462874	0.503669	0.999491	211	-0.0978874	0.0434573	0.622361	426	0.0184418	0.806436	0.950479	179	-0.0871762	0.142803	0.417316	284	0.22942	0.0174512	0.512884	107	0.0858397	0.23524	0.577163	193
BCAS4_55653	0.0396055	0.567247	0.999491	211	-0.022269	0.646713	0.950414	426									-0.072594	0.457434	0.898539	107	0.0921197	0.202605	0.548199	193
BCAT1_586	0.0508091	0.463941	0.999491	210	0.00319959	0.947874	0.993829	420									-0.115014	0.103986	0.694416	201	-0.0577272	0.285668	0.626487	344
BCAT2_587	-0.161256	0.0193767	0.98243	210	-0.0769338	0.115416	0.730259	420									-0.104838	0.138567	0.736994	201	-0.0874452	0.105433	0.409583	344
BCCIP_56647	0.174872	0.0109367	0.98243	211	-0.0151333	0.75546	0.966249	426	0.0726575	0.333765	0.750516	179	-0.0203232	0.734004	0.88617	282	0.110054	0.11988	0.706255	201	0.112381	0.0372169	0.251794	344
BCDIN3D_144233	-0.0397791	0.565548	0.999491	211	-0.0260233	0.592216	0.939141	426	0.0264743	0.725001	0.926184	179	-0.0698466	0.240668	0.533585	284	-0.120918	0.214733	0.798214	107	-0.0786322	0.277045	0.617887	193
BCHE_590	-0.0489779	0.479166	0.999491	211	-0.0722341	0.13663	0.752453	426	0.0480558	0.524128	0.853168	178	0.0169681	0.776642	0.90631	282	-0.113928	0.107314	0.700383	201	-0.157957	0.00330906	0.0859506	344
BCKDHA_593	-0.119714	0.0827656	0.991819	211	-0.0304071	0.531383	0.923065	426									0.0324258	0.647694	0.946989	201	-0.0119331	0.82546	0.936453	344
BCKDHB_594	0.10157	0.141446	0.999491	211	0.062752	0.19613	0.795629	426									0.0400231	0.572678	0.932477	201	0.056603	0.29517	0.634361	344
BCKDK_10295	-0.109353	0.113248	0.999491	211	-0.0124007	0.798564	0.974463	426	-0.239201	0.00100852	0.120044	186	-0.2374	4.29604e-05	0.00856523	291	-0.151673	0.0316043	0.576787	201	-0.124693	0.0207051	0.192837	344
BCL10_8915	-0.028565	0.679936	0.999491	211	-0.0332664	0.493481	0.915178	426	-0.0952301	0.206068	0.64779	178	-0.0888696	0.136568	0.408527	282	0.124085	0.0792556	0.666253	201	0.12162	0.0240777	0.205151	344
BCL11A_53335	0.0194499	0.778806	0.999491	211	0.0221341	0.648709	0.951032	426	-0.00205088	0.978263	0.995031	179	0.0220672	0.712149	0.877105	282	-0.0147537	0.835325	0.97748	201	0.0593523	0.272299	0.613883	344
BCL11B_64919	0.0420394	0.543653	0.999491	211	-0.0916121	0.0588554	0.652237	426	-0.0572537	0.446501	0.81437	179	-0.0188571	0.752545	0.895887	282	0.0597743	0.399276	0.882712	201	-0.0353209	0.513805	0.789003	344
BCL2A1_597	-0.0773724	0.263182	0.999491	211	0.00591826	0.903062	0.98918	426									-0.0280065	0.693093	0.95463	201	-0.0711587	0.187951	0.531947	344
BCL2L10_10017	0.000567814	0.993458	0.999963	211	0.00782738	0.872028	0.985362	426	0.0240137	0.749669	0.93261	179	0.00781471	0.896052	0.959068	282	0.0242566	0.7325	0.963044	201	0.00265241	0.960907	0.987669	344
BCL2L11_10018	-0.132579	0.0544959	0.983399	211	0.0126519	0.794574	0.973753	426									-0.0264175	0.709698	0.957192	201	-0.011538	0.83115	0.93873	344
BCL2L12_83596	-0.125656	0.0685087	0.987144	211	-0.111977	0.0207968	0.533735	426									0.0729514	0.303392	0.847027	201	-0.00355279	0.947653	0.982322	344
BCL2L13_23786	0.0190641	0.783084	0.999491	211	-0.0752059	0.121174	0.73797	426									-0.0937112	0.185764	0.782928	201	-0.0200877	0.71045	0.888452	344
BCL2L14_79370	-0.0660935	0.339373	0.999491	211	-0.105632	0.0292631	0.572992	426	0.0639301	0.395211	0.783866	179	0.0430739	0.469663	0.727293	284	-0.0504671	0.476783	0.906664	201	0.0536982	0.320689	0.654462	344
BCL2L15_440603	0.0124042	0.857846	0.999491	211	0.00924453	0.849114	0.981686	426
BCL2L1_598	-0.0266828	0.699973	0.999491	211	-0.0635164	0.190726	0.792349	426	0.225155	0.00244329	0.154298	179	0.226226	0.000120268	0.0124563	284	0.181005	0.0101269	0.480404	201	0.108188	0.0449447	0.274234	344
BCL2L2-PABPN1_100529063									0.0866883	0.240673	0.680581	185	0.0503944	0.393363	0.672236	289	0.0425699	0.548479	0.925568	201	-0.00123791	0.981749	0.993345	344
BCL2L2_599	-0.0527058	0.446312	0.999491	211	-0.0357973	0.461175	0.904621	426	0.121743	0.104494	0.52918	179	-0.00210626	0.97181	0.991175	284	0.00581906	0.934658	0.990331	201	0.050695	0.348536	0.676938	344
BCL2_596	-0.0077665	0.910707	0.999491	211	-0.126704	0.00884402	0.430011	426	-0.0438401	0.552409	0.861957	186	-0.129348	0.0273631	0.178577	291	0.013893	0.844807	0.978292	201	-0.0907497	0.0928603	0.38858	344
BCL3_602	-0.0949762	0.16928	0.999491	211	-0.0481495	0.321466	0.856533	426	-0.0567311	0.450669	0.815881	179	0.0303946	0.609997	0.815056	284	0.0918783	0.194555	0.784959	201	0.0364863	0.500006	0.78041	344
BCL6B_255877	0.0705961	0.307421	0.999491	211	0.0713069	0.14175	0.756829	426	-0.0353541	0.639422	0.891089	178	-0.0790144	0.185818	0.47473	282	0.0881115	0.213564	0.798214	201	0.0384972	0.476662	0.767488	344
BCL6_604	0.0909144	0.188346	0.999491	211	-0.109561	0.0237289	0.538356	426	0.0859806	0.252456	0.691694	179	-0.0391116	0.511525	0.756371	284	0.123858	0.0798088	0.666253	201	0.0197832	0.714645	0.890256	344
BCL7A_605	0.104739	0.12938	0.999491	211	0.026868	0.58025	0.936741	426	-0.13649	0.0692658	0.465194	178	-0.0461868	0.439774	0.706197	282	-0.0490126	0.489594	0.912857	201	-0.0406351	0.452511	0.75468	344
BCL7B_9275	0.0284066	0.681614	0.999491	211	0.0105345	0.828366	0.978505	426									0.0977849	0.167277	0.762625	201	0.128209	0.0173552	0.178941	344
BCL7C_9274	0.0448211	0.517294	0.999491	211	-0.0218582	0.6528	0.951663	426									0.0893034	0.20741	0.794167	201	0.135515	0.0118727	0.149233	344
BCL9L_283149	-0.0134824	0.845637	0.999491	211	0.00555828	0.908932	0.98998	426									-0.0690594	0.329985	0.857132	201	0.0320551	0.553501	0.813787	344
BCL9_607	0.0572642	0.407926	0.999491	211	0.0471044	0.332094	0.862064	426	-0.0782661	0.297694	0.722931	179	-0.0452498	0.449119	0.71128	282	0.112264	0.112577	0.700846	201	0.0588229	0.276607	0.617244	344
BCLAF1_9774	0.148481	0.0310865	0.98243	211	0.0422073	0.38486	0.878185	426	0.0377149	0.616206	0.884641	179	0.112641	0.0588687	0.265027	282	-0.0506999	0.47475	0.905957	201	0.00124118	0.981701	0.993345	344
BCLAF3_256643	-0.0196476	0.776618	0.999491	211	-0.00550989	0.909722	0.990114	426									-0.155102	0.0279091	0.561175	201	-0.100516	0.0625699	0.320518	344
BCO1_53630	0.0702876	0.310707	0.999491	210	0.0698928	0.152758	0.766498	420
BCO2_83875	0.0522438	0.451402	0.999491	210	0.0354423	0.468811	0.907714	420									-0.113103	0.109899	0.700846	201	-0.0586436	0.278076	0.619077	344
BCORL1_63035	0.134769	0.0511484	0.983399	210	0.060411	0.216646	0.805848	420									0.014997	0.832649	0.97699	201	-0.00798645	0.882667	0.958276	344
BCORP1_286554																	0.0032545	0.963428	0.993612	201	0.126144	0.0192594	0.186092	344
BCOR_54880	-0.0482257	0.486999	0.999491	210	-0.0576629	0.23832	0.822159	420	-0.0736346	0.328661	0.746467	178	-0.0771375	0.19652	0.485066	282	-0.0570863	0.420851	0.888365	201	-0.108157	0.045006	0.274509	344
BCRP2_400892																	-0.332741	0.000462115	0.239461	107	-0.183404	0.0106777	0.142805	193
BCR_613	-0.00252061	0.970966	0.999491	211	-0.0638601	0.188333	0.790402	426	-0.117848	0.116151	0.543556	179	-0.061678	0.300287	0.594831	284	0.0858762	0.225454	0.803036	201	-0.0318835	0.555628	0.815202	344
BCS1L_617	-0.0136158	0.844129	0.999491	211	-0.0838397	0.0839182	0.687747	426	-0.170036	0.0228704	0.328028	179	-0.178613	0.00260946	0.058953	282	-0.0315442	0.656654	0.94875	201	-0.0588264	0.276578	0.617244	344
BDH1_622	0.0342433	0.620881	0.999491	211	-0.0126287	0.794943	0.973938	426									0.0839882	0.235856	0.812419	201	-0.00604399	0.911067	0.967754	344
BDH2_56898	0.0847441	0.220246	0.999491	211	-0.118094	0.0147358	0.491575	426									0.041801	0.555732	0.926963	201	0.106193	0.04907	0.285574	344
BDKRB1_623	0.0388144	0.57502	0.999491	211	-0.0293256	0.546093	0.924648	426	-0.0222156	0.768497	0.939995	178	0.0552822	0.355002	0.64019	282	0.053535	0.45037	0.896824	201	0.00224022	0.966978	0.989273	344
BDKRB2_624	-0.110735	0.108737	0.999491	211	-0.0131316	0.786969	0.972781	426	-0.103798	0.167952	0.612251	178	-0.0155217	0.795241	0.915849	282	0.051722	0.465879	0.901259	201	0.0626165	0.246752	0.58965	344
BDNF_627	-0.0534676	0.439759	0.999491	211	-0.0376228	0.438624	0.894974	426									-0.035809	0.613787	0.94047	201	-0.0101496	0.851216	0.947209	344
BDP1_55814	-0.0493145	0.477207	0.999491	210	-0.0253304	0.604699	0.94112	420	-0.214398	0.00395223	0.176084	179	-0.143981	0.0151664	0.134242	284	0.0235913	0.739569	0.964157	201	-0.0782044	0.147781	0.478561	344
BEAN1_146227	0.142422	0.0387291	0.98243	211	0.143876	0.00291712	0.329914	426
BECN1_8678	0.0664404	0.336838	0.999491	211	-0.0810285	0.0948713	0.703317	426	-0.0966875	0.19045	0.633906	185	-0.0539705	0.360617	0.64526	289	0.0766444	0.279503	0.835562	201	0.0548381	0.310508	0.646476	344
BEGAIN_57596	0.0489038	0.479833	0.999491	211	-0.0249187	0.608032	0.941539	426									-0.0196286	0.782107	0.970763	201	-0.0581322	0.282295	0.623663	344
BEND2_139105	-0.0885452	0.200169	0.999491	211	-0.0390531	0.421405	0.887608	426									-0.134018	0.16875	0.765001	107	-0.00779779	0.914291	0.968879	193
BEND3_57673	-0.0511146	0.460178	0.999491	211	-0.046208	0.341387	0.866817	426
BEND4_389206	-0.0693258	0.316228	0.999491	211	0.101588	0.0360814	0.598825	426
BEND5_79656	-0.0701314	0.310623	0.999491	211	-0.0468297	0.334924	0.864464	426
BEND6_221336	-0.0816673	0.237518	0.999491	211	-0.0178768	0.712934	0.962171	426									0.174387	0.072419	0.663043	107	0.118808	0.099837	0.401048	193
BEND7_222389	-0.0305871	0.658657	0.999491	211	-0.0327717	0.499933	0.917098	426
BEST1_7439	-0.190331	0.0055424	0.98243	211	0.00614624	0.899348	0.989035	426									0.03831	0.695227	0.955203	107	0.18569	0.00972514	0.137694	193
BEST2_54831	0.0564795	0.414391	0.999491	211	0.00979415	0.840261	0.980199	426									-0.00808281	0.934147	0.990331	107	0.121611	0.0920341	0.387445	193
BEST3_144453	0.0128794	0.85246	0.999491	211	0.00118521	0.980541	0.999202	426									0.070915	0.467931	0.90281	107	0.00666537	0.9267	0.973837	193
BEST4_266675	-0.0542684	0.432929	0.999491	211	0.0168813	0.72827	0.964022	426									0.0644734	0.5094	0.918533	107	0.0358641	0.620486	0.847634	193
BET1L_51272	0.0148657	0.830027	0.999491	211	0.0453059	0.350905	0.868544	426
BET1_10282	-0.033917	0.624214	0.999491	211	-0.0300961	0.535593	0.923421	426	-0.110808	0.139764	0.576346	179	-0.110537	0.0637858	0.276875	282	-0.116157	0.233473	0.809625	107	-0.0737401	0.308125	0.644783	193
BEX1_55859	0.0002911	0.996646	0.999963	211	-0.0332254	0.494015	0.915269	426									0.063847	0.513531	0.918947	107	-0.0597628	0.409033	0.721948	193
BEX2_84707	-0.0110206	0.873561	0.999491	211	-0.0199723	0.681033	0.955608	426									0.0750458	0.442341	0.893902	107	0.0469233	0.516984	0.790479	193
BEX3_27018	-0.046448	0.502189	0.999491	211	-0.0367077	0.449849	0.899343	426									-0.00154214	0.982666	0.997803	201	-0.0861456	0.110731	0.418616	344
BEX4_56271	0.120515	0.0807158	0.991144	211	0.0667959	0.168779	0.779303	426
BEX5_340542	-0.0953481	0.167608	0.999491	211	0.00423588	0.930535	0.990788	426									0.134185	0.168216	0.763604	107	0.0205087	0.777104	0.915435	193
BFAR_51283	-0.0477938	0.48987	0.999491	211	-0.00215626	0.964606	0.996529	426									0.0740201	0.296345	0.843265	201	-0.00785035	0.884652	0.958524	344
BFSP1_631	0.133093	0.053558	0.983399	211	0.115975	0.0166315	0.496625	426	-0.0520212	0.489196	0.834769	179	-0.0328389	0.582897	0.801453	282	-0.033632	0.635517	0.944441	201	0.0618624	0.252501	0.59528	344
BFSP2_8419	-0.0460162	0.506175	0.999491	211	-0.00943464	0.84605	0.981325	426									0.0117888	0.86808	0.981704	201	0.0969051	0.0726525	0.342845	344
BGLAP_632	-0.0103858	0.880788	0.999491	211	0.0437548	0.367659	0.871144	426	-0.000769212	0.991846	0.997581	179	0.133196	0.0253009	0.172457	282	0.0319414	0.652611	0.947897	201	0.0171847	0.750794	0.906392	344
BGN_633	0.0945094	0.171394	0.999491	211	0.0926525	0.0560279	0.648988	426	-0.04862	0.518074	0.849612	179	-0.0778776	0.192247	0.48092	282	0.0750063	0.442582	0.893902	107	0.0718098	0.320995	0.65461	193
BHLHA15_168620	0.00300924	0.965341	0.999491	211	-0.0649573	0.180839	0.783521	426	-0.183813	0.0140468	0.283669	178	-0.10589	0.0758501	0.302907	282	0.0211816	0.765351	0.968321	201	-0.0679163	0.208925	0.554585	344
BHLHA9_727857	0.10288	0.136356	0.999491	211	-0.0149634	0.758119	0.966322	426
BHLHB9_80823	-0.00901278	0.896453	0.999491	211	-0.0181723	0.708403	0.961115	426									0.1748	0.0717347	0.661305	107	0.117694	0.103078	0.40585	193
BHLHE22_27319	-0.0516048	0.455881	0.999491	211	-0.00461695	0.924304	0.990242	426	0.00288507	0.969425	0.994518	179	-0.023332	0.696445	0.869035	282	0.0615012	0.38577	0.876341	201	0.0311544	0.564707	0.821012	344
BHLHE23_128408	0.0829519	0.230195	0.999491	211	-0.00562772	0.9078	0.989974	426	-0.0662042	0.379935	0.775297	178	-0.095846	0.108257	0.363682	282	-0.0792689	0.263318	0.828491	201	-0.144089	0.00743499	0.122815	344
BHLHE40_8553	-0.0352931	0.610209	0.999491	211	-0.0639778	0.187518	0.789414	426	0.0404667	0.590691	0.876483	179	0.152519	0.0100518	0.114682	284	0.078016	0.270963	0.831941	201	0.05081	0.347442	0.675885	344
BHLHE41_79365	0.0664851	0.336512	0.999491	211	-0.0191686	0.693205	0.957718	426	0.0883501	0.239569	0.680401	179	0.123282	0.0378619	0.212335	284	-0.00635713	0.928632	0.990322	201	-0.166131	0.00199098	0.0699896	344
BHMT2_23743	-0.0614075	0.374791	0.999491	211	0.04484	0.355886	0.868967	426	-0.00546029	0.94217	0.985023	179	0.117278	0.0491281	0.241397	282	-0.150459	0.0330086	0.587166	201	-0.0446669	0.408892	0.721948	344
BHMT_635	0.0456337	0.50972	0.999491	211	-0.0366141	0.451007	0.899519	426	-0.0466306	0.535362	0.856216	179	-0.058724	0.325798	0.616289	282	-0.150668	0.0327635	0.587115	201	-0.0607927	0.260812	0.603185	344
BICC1_80114	-0.053223	0.441857	0.999491	211	-0.0129679	0.789562	0.972919	426									-0.0151085	0.87725	0.983113	107	0.0636118	0.37947	0.701938	193
BICD1_636	0.0389738	0.57345	0.999491	211	0.0499224	0.30395	0.847511	426									0.0743177	0.446793	0.894922	107	0.0299639	0.679123	0.87593	193
BICD2_23299	-0.0202016	0.770492	0.999491	211	-0.015998	0.741971	0.964906	426									0.0493908	0.486245	0.911404	201	0.0970164	0.0723233	0.342407	344
BICDL1_92558	0.0524269	0.448725	0.999491	211	-0.0101582	0.834407	0.979252	426									-0.0712959	0.465538	0.901154	107	-0.0794783	0.271893	0.613709	193
BICDL2_146439	0.112696	0.102579	0.999491	211	0.138786	0.00410478	0.355058	426
BICRAL_23506	0.116451	0.0915573	0.999491	211	-0.0597723	0.218262	0.80675	426
BICRA_29998	-0.0327074	0.636637	0.999491	211	-0.137854	0.0043646	0.357882	426									-0.0279491	0.69369	0.954911	201	-0.0575683	0.286998	0.627433	344
BID_637	0.124843	0.0703335	0.987144	211	-0.0197408	0.684531	0.956064	426									-0.146812	0.0375517	0.602125	201	-0.180019	0.000796098	0.0503344	344
BIK_638	0.0591076	0.392975	0.999491	211	0.0640939	0.186717	0.787541	426									-0.108739	0.124395	0.715498	201	-0.139412	0.00962695	0.137104	344
BIN1_274	-0.13132	0.0568502	0.983399	211	-0.0345619	0.476796	0.91034	426	0.0256206	0.733529	0.928122	179	0.044692	0.454734	0.715951	282	-0.0440916	0.652026	0.947897	107	-0.00614423	0.932417	0.97611	193
BIN2_51411	-0.0558313	0.419777	0.999491	211	-0.118203	0.0146435	0.491575	426	-0.0556146	0.460919	0.820864	178	-0.0959131	0.108009	0.36314	282	-0.233781	0.0153707	0.506665	107	-0.172407	0.0165038	0.175267	193
BIN3_55909	0.0831105	0.229302	0.999491	211	0.0399848	0.410405	0.886001	426	-0.0836545	0.265566	0.69794	179	-0.0857246	0.151056	0.426695	282	-0.0795377	0.415432	0.886244	107	0.0371262	0.608231	0.842471	193
BIRC2_329	0.00974082	0.888408	0.999491	210	0.0289993	0.553407	0.926828	420	0.063983	0.385603	0.77715	186	-0.00283777	0.961556	0.986799	291	-0.0171073	0.809522	0.97458	201	-0.029251	0.588737	0.832621	344
BIRC3_330	0.0562124	0.416606	0.999491	211	0.0228467	0.638193	0.948439	426	-0.110377	0.133673	0.568544	186	-0.0913706	0.119896	0.382471	291	-0.00108586	0.987794	0.998188	201	0.038263	0.479349	0.768713	344
BIRC5_332	0.017322	0.802479	0.999491	211	-0.0538667	0.267285	0.83552	426	-0.0425066	0.565634	0.866643	185	-0.0207265	0.725693	0.883395	289	0.0968601	0.171349	0.768013	201	0.0323312	0.550088	0.811617	344
BIRC6_57448	0.0968762	0.160871	0.999491	211	0.103895	0.0320428	0.583311	426	0.0866476	0.240894	0.680581	185	0.149108	0.011147	0.120131	289	0.188213	0.00745752	0.444075	201	0.119704	0.0264128	0.215618	344
BIRC7_79444	-0.00501066	0.942322	0.999491	211	-0.0130261	0.78864	0.972919	426	-0.0949598	0.206074	0.64779	179	-0.0985865	0.0972924	0.345001	284	-0.0583307	0.410779	0.885108	201	0.00816101	0.880121	0.957349	344
BIRC8_112401	0.0026905	0.96901	0.999491	211	0.0208074	0.668474	0.953758	426									-0.161932	0.0216388	0.533474	201	-0.124845	0.0205487	0.192392	344
BIVM-ERCC5_100533467									0.0640979	0.386047	0.777558	185	0.148178	0.0116675	0.120378	289	-0.0857649	0.226058	0.803821	201	-0.0654108	0.226252	0.569123	344
BIVM_54841	-0.00890771	0.897654	0.999491	211	-0.0119909	0.805085	0.97567	426
BLCAP_10904	-0.0812584	0.239883	0.999491	211	-0.0442136	0.362653	0.870319	426	-0.0593842	0.420737	0.800806	186	-0.0793826	0.176865	0.465205	291	0.0879245	0.367822	0.866755	107	0.137295	0.0569095	0.307785	193
BLID_414899	-0.0876699	0.20467	0.999491	211	0.0102965	0.832186	0.978803	426
BLK_640	-0.0464364	0.502295	0.999491	211	0.017309	0.721668	0.962712	426	-0.0734801	0.32968	0.747357	178	0.0515856	0.388139	0.667294	282	-0.0778771	0.27182	0.831941	201	-0.037435	0.488918	0.774201	344
BLMH_642	-0.0541181	0.434206	0.999491	211	0.0427521	0.37875	0.877028	426									-0.0176583	0.80351	0.97336	201	-0.00674627	0.900784	0.964941	344
BLM_641	0.129773	0.0598584	0.983399	211	0.155742	0.00126091	0.259681	426	0.0214579	0.77618	0.942552	178	0.0305128	0.609883	0.815056	282	0.0510529	0.471675	0.904452	201	0.0858756	0.111858	0.420851	344
BLNK_29760	-0.128029	0.0634069	0.987144	211	-0.087593	0.0709091	0.673555	426	-0.136305	0.0665419	0.459791	182	-0.0494619	0.404662	0.68084	286	0.0183555	0.795918	0.971804	201	-0.0488473	0.366407	0.690568	344
BLOC1S1-RDH5_100528022									-0.113429	0.130577	0.563805	179	-0.0587604	0.325498	0.616289	282	0.0632317	0.372518	0.87012	201	0.0517566	0.338522	0.668638	344
BLOC1S1_2647	-0.0222158	0.748342	0.999491	211	-0.00582313	0.904613	0.989497	426									-0.0754624	0.287007	0.839329	201	-0.018593	0.731129	0.897185	344
BLOC1S2_282991	0.0181476	0.793271	0.999491	211	0.0214214	0.659296	0.952666	426									0.178165	0.0663539	0.651615	107	0.0580384	0.422707	0.733371	193
BLOC1S3_388552	0.0110509	0.873216	0.999491	211	-0.0124179	0.798291	0.974463	426
BLOC1S4_55330	-0.00445088	0.948756	0.999491	211	0.0205763	0.67194	0.954444	426									-0.00369157	0.969897	0.9952	107	0.0991146	0.170257	0.508374	193
BLOC1S5-TXNDC5_100526836																	0.00358836	0.959679	0.993221	201	-0.104715	0.0523254	0.29509	344
BLOC1S5_63915	0.00899366	0.896672	0.999491	211	0.0466345	0.336945	0.864582	426									-0.0549914	0.573721	0.932477	107	-0.0283997	0.695016	0.883401	193
BLOC1S6_26258	0.113316	0.10069	0.999491	211	0.0512582	0.291177	0.846927	426									0.100301	0.303981	0.847395	107	-0.00730176	0.919724	0.970826	193
BLVRA_644	0.0193394	0.780031	0.999491	211	0.036254	0.455474	0.901602	426									0.0947711	0.180816	0.780392	201	0.0589034	0.275949	0.616799	344
BLVRB_645	-0.0343239	0.620058	0.999491	211	-0.0135339	0.780607	0.970883	426									-0.0944196	0.182446	0.782538	201	-0.0562504	0.298194	0.636868	344
BLZF1_8548	0.181885	0.00808587	0.98243	211	0.0540006	0.266096	0.834297	426	0.111301	0.137999	0.573565	179	-0.0525478	0.377639	0.658509	284	-0.0085155	0.904501	0.986797	201	0.00437629	0.935543	0.977368	344
BMF_90427	0.0547539	0.428818	0.999491	211	0.0312062	0.520644	0.922355	426									-0.134366	0.167636	0.762625	107	-0.105694	0.14349	0.471963	193
BMI1_648	0.105656	0.126952	0.999491	210	0.016835	0.730838	0.964022	420									-0.00620706	0.930312	0.990322	201	0.0427834	0.428951	0.738227	344
BMP10_27302	0.0562023	0.41669	0.999491	211	0.107391	0.0266618	0.563178	426									-0.0453488	0.642777	0.946989	107	-0.0857886	0.23552	0.577453	193
BMP15_9210	0.0139445	0.840415	0.999491	211	-0.0512123	0.29161	0.847156	426									0.0692019	0.328986	0.857132	201	0.0812294	0.132689	0.455149	344
BMP1_649	0.0597167	0.388108	0.999491	211	0.0807895	0.0958528	0.703317	426									-0.115288	0.103158	0.693616	201	0.0787682	0.144873	0.474463	344
BMP2K_55589	-0.0625264	0.366135	0.999491	211	-0.0157776	0.745401	0.965043	426	0.0405549	0.589881	0.876483	179	0.129432	0.0297777	0.187807	282	0.0775287	0.273976	0.83357	201	0.0414265	0.443748	0.748665	344
BMP2_650	0.0905831	0.189967	0.999491	211	0.0783469	0.106356	0.716377	426	-0.160732	0.0316046	0.362499	179	-0.183753	0.00187395	0.0489326	284	-0.0328688	0.643211	0.946989	201	-0.0111942	0.836109	0.940202	344
BMP3_651	-5.76249e-05	0.999336	0.999972	211	-0.0730027	0.132494	0.74879	426									0.022476	0.751468	0.966159	201	-0.00281223	0.958553	0.987188	344
BMP4_652	0.039081	0.572395	0.999491	211	0.0488287	0.314679	0.852141	426	-0.0952764	0.204559	0.645827	179	-0.0981457	0.0988053	0.347737	284	0.0763116	0.281602	0.835562	201	-0.0795895	0.140716	0.466963	344
BMP5_653	-0.0374967	0.588076	0.999491	211	-0.0583234	0.229648	0.816421	426									0.0840271	0.235639	0.812419	201	0.112012	0.0378482	0.253456	344
BMP6_654	0.0269101	0.697542	0.999491	211	0.0214269	0.659215	0.952666	426									-0.0316459	0.655618	0.94875	201	-0.052738	0.32943	0.661982	344
BMP7_655	0.00823846	0.905306	0.999491	211	-0.00423686	0.93052	0.990788	426	-0.045866	0.543229	0.85976	178	-0.0319273	0.593407	0.80681	282	0.0832592	0.239962	0.814497	201	0.0703554	0.192998	0.538435	344
BMP8A_353500	-0.000591974	0.99318	0.999963	211	-0.0610523	0.208545	0.802264	426									-0.0214467	0.762502	0.968159	201	-0.013826	0.798327	0.924531	344
BMP8B_656	0.0837222	0.225881	0.999491	211	0.0113951	0.814589	0.977154	426									0.0275348	0.698007	0.955717	201	-0.00700294	0.89703	0.963816	344
BMPER_168667	0.0340262	0.623097	0.999491	211	-0.0215753	0.657005	0.952206	426	0.0708899	0.347059	0.755701	178	0.0486649	0.415602	0.689006	282	-0.00384997	0.956742	0.993136	201	-0.0644797	0.232944	0.574985	344
BMPR1A_657	0.0903126	0.191299	0.999491	211	0.0145622	0.76441	0.967541	426	-0.0195043	0.795523	0.94852	179	-0.0168523	0.777355	0.906611	284	-0.0276988	0.696297	0.955272	201	-0.0134941	0.803068	0.926442	344
BMPR1B_658	-0.177645	0.00971795	0.98243	211	-0.0528385	0.276538	0.839825	426	-0.147503	0.0445253	0.406281	186	-0.0857798	0.144376	0.419448	291	0.0399205	0.573663	0.932477	201	0.0234728	0.664412	0.868994	344
BMPR2_659	0.070281	0.30959	0.999491	211	-0.123475	0.0107484	0.457895	426	-0.0855608	0.254788	0.692656	179	-0.0779071	0.190496	0.478942	284	0.00122132	0.986271	0.998091	201	-0.038268	0.479292	0.768713	344
BMS1_9790	-0.0769363	0.265891	0.999491	211	-0.0160224	0.74159	0.964906	426	-0.0368424	0.625379	0.886018	178	0.0151571	0.799947	0.918454	282	-0.069359	0.477777	0.906664	107	0.0376419	0.603255	0.839742	193
BMT2_154743	0.120626	0.0804342	0.991144	211	0.0922387	0.0571386	0.649478	426									0.0307961	0.752845	0.966272	107	0.0175991	0.808063	0.928671	193
BMX_660	-0.0748253	0.27927	0.999491	211	0.00963696	0.842791	0.980451	426	0.0189589	0.801119	0.949887	179	0.0702565	0.239586	0.532822	282	0.00366525	0.958816	0.993221	201	-0.0924111	0.0870082	0.375244	344
BNC1_646	0.059638	0.388735	0.999491	211	0.0631288	0.193453	0.794085	426	0.00760007	0.919573	0.981313	179	0.0625919	0.293169	0.588033	284	0.0128783	0.856014	0.97998	201	0.0994496	0.0654208	0.326189	344
BNC2_54796	-0.106469	0.123136	0.999491	211	-0.0120367	0.804355	0.975272	426									0.0494641	0.485597	0.911404	201	0.0681	0.207694	0.552805	344
BNIP1_662	0.027139	0.695097	0.999491	211	0.00031939	0.994756	0.999946	426	0.190488	0.0106454	0.258172	179	0.125753	0.0341505	0.20204	284	0.154162	0.0288841	0.561903	201	0.0441649	0.414184	0.725905	344
BNIP2_663	0.0344682	0.618587	0.999491	211	0.0623531	0.198995	0.795982	426									-0.0185115	0.794223	0.971804	201	-0.00697435	0.897448	0.963958	344
BNIP3L_665	0.0470262	0.496876	0.999491	211	0.00994952	0.837762	0.979788	426	0.0567075	0.450857	0.815881	179	0.00788515	0.894748	0.958186	284	-0.0152356	0.830027	0.976751	201	-0.0937579	0.0824848	0.364863	344
BNIP3_664	-0.0283202	0.68253	0.999491	211	0.037117	0.444808	0.896953	426	-0.0433714	0.564294	0.865839	179	0.0604732	0.309845	0.60206	284	-0.0292215	0.680494	0.953282	201	-0.0400835	0.458675	0.757389	344
BNIPL_149428	0.114817	0.0962289	0.999491	211	0.0226885	0.640522	0.948768	426									0.0690736	0.329885	0.857132	201	0.0489234	0.36566	0.690354	344
BOC_91653	0.0478089	0.489733	0.999491	211	0.00326673	0.946401	0.993329	426									0.0980747	0.166016	0.762625	201	0.0422073	0.435198	0.742766	344
BOD1L1_259282	-0.0452471	0.513316	0.999491	211	-0.0144421	0.766298	0.968251	426
BOD1L2_284257	-0.0776919	0.26121	0.999491	211	-0.0149839	0.757799	0.966322	426
BOD1_91272	0.0347883	0.61533	0.999491	211	-0.0252803	0.602834	0.939833	426
BOK_666	0.0182923	0.791661	0.999491	211	-0.0163366	0.736709	0.964906	426									-0.0635337	0.370235	0.868585	201	0.0387387	0.473899	0.765761	344
BOLA1_51027	0.00535616	0.938352	0.999491	211	-0.0321392	0.508249	0.920252	426									0.106517	0.132324	0.728423	201	-0.0859389	0.111593	0.420582	344
BOLA3_388962	0.0373396	0.589642	0.999491	211	0.0717435	0.139321	0.755769	426									-0.102946	0.291343	0.841906	107	-0.0484852	0.503116	0.781771	193
BOLL_66037	0.0266887	0.69991	0.999491	211	-0.0328253	0.499232	0.916808	426	-0.0667805	0.375793	0.774119	178	0.019557	0.743676	0.891315	282	0.0348253	0.721757	0.959366	107	0.0110104	0.879208	0.957308	193
BOP1_23246	0.000294259	0.99661	0.999963	211	-0.0297398	0.540436	0.9244	426	-0.145973	0.0512048	0.42296	179	-0.112597	0.0580693	0.263276	284	0.0678734	0.338378	0.858499	201	0.0713055	0.18704	0.530688	344
BORA_79866	-0.0130216	0.85085	0.999491	211	-0.0465298	0.338031	0.865472	426									0.21847	0.0237775	0.542976	107	0.079721	0.270427	0.6128	193
BORCS5_118426	0.0687455	0.320305	0.999491	211	0.0373327	0.442165	0.895628	426									0.0462189	0.636407	0.944441	107	0.0293307	0.68554	0.878799	193
BORCS6_54785	-0.000592344	0.993176	0.999963	211	-0.0511535	0.292165	0.847156	426
BORCS7-ASMT_100528007																	-0.180714	0.0102506	0.483798	201	-0.139672	0.00949145	0.136426	344
BORCS7_119032	0.0675509	0.328806	0.999491	211	0.0962405	0.0471272	0.630183	426									0.048982	0.616355	0.941326	107	0.199586	0.00538954	0.106186	193
BORCS8-MEF2B_4207									-0.165629	0.0267072	0.339941	179	-0.147078	0.0130947	0.126429	284
BORCS8_729991	0.0447629	0.517839	0.999491	211	0.0335621	0.489645	0.913591	426
BPESC1_60467																	0.00278719	0.977269	0.996752	107	-0.0329765	0.648913	0.862038	193
BPGM_669	0.0840195	0.224231	0.999491	211	0.0339033	0.48524	0.911715	426	0.0320712	0.670853	0.90283	178	0.00209826	0.972016	0.991175	282	0.0676659	0.33986	0.858514	201	0.00178956	0.973618	0.99106	344
BPHL_670	-0.0315329	0.648797	0.999491	211	0.0257915	0.59552	0.939141	426									0.0234561	0.741008	0.964157	201	-0.00275549	0.959389	0.98729	344
BPIFA1_51297	-0.0806153	0.243636	0.999491	211	-0.048146	0.321501	0.856533	426									-0.0403723	0.679696	0.953169	107	0.0361373	0.617824	0.845584	193
BPIFA2_140683	-0.0599609	0.386167	0.999491	211	-0.0315352	0.516255	0.921952	426									0.148154	0.127775	0.721742	107	-0.046784	0.51823	0.791619	193
BPIFA3_128861	-0.0243668	0.724915	0.999491	211	-0.0606928	0.211242	0.802692	426									0.0529912	0.587758	0.93409	107	-0.0443292	0.540445	0.806336	193
BPIFA4P_317716																	-0.032051	0.651497	0.947897	201	-0.0296872	0.583189	0.829978	344
BPIFB1_92747	0.0690268	0.318325	0.999491	211	-0.0434078	0.371474	0.873554	426									-0.104905	0.282211	0.835562	107	-0.0709949	0.326531	0.659736	193
BPIFB2_80341	-0.0092047	0.894261	0.999491	211	-0.0667084	0.169339	0.779765	426
BPIFB3_359710	-0.0390675	0.572527	0.999491	211	-0.0755627	0.119413	0.73417	426									0.0130239	0.89408	0.984775	107	0.0319193	0.659453	0.866802	193
BPIFB4_149954	0.0220393	0.750276	0.999491	211	-0.0418332	0.389091	0.879654	426
BPIFB6_128859	-0.0426343	0.537961	0.999491	211	-0.0677028	0.163057	0.774864	426									-0.12246	0.208902	0.795009	107	-0.11172	0.121906	0.437937	193
BPIFC_254240	0.0511231	0.460103	0.999491	211	-0.0331054	0.495577	0.916086	426									0.137053	0.159223	0.754461	107	0.0770077	0.287122	0.627459	193
BPI_671	-0.0137357	0.842774	0.999491	211	-0.0154513	0.75049	0.965379	426									-0.0574268	0.556844	0.927263	107	-0.0533429	0.46126	0.75925	193
BPNT1_10380	0.0421244	0.542838	0.999491	211	0.114756	0.017816	0.502817	426									0.101411	0.152008	0.745609	201	0.0364932	0.499924	0.78041	344
BPTF_2186	-0.0317847	0.646974	0.999491	210	-0.0427221	0.382482	0.877883	420	-0.117094	0.11852	0.545884	179	-0.0743781	0.211429	0.503068	284	-0.149574	0.0340659	0.589913	201	-0.0833849	0.12268	0.439559	344
BPY2B&BPY2C&BPY2_442867&442868&9083																	-0.0652431	0.357472	0.863375	201	-0.071442	0.186195	0.529312	344
BRAF_673	0.0545	0.430965	0.999491	211	0.0592441	0.222365	0.810536	426	0.0435844	0.554731	0.86236	186	0.017325	0.768534	0.903462	291	0.0168297	0.812555	0.974962	201	-0.0210135	0.697745	0.88412	344
BRAP_8315	-0.0375092	0.587952	0.999491	211	0.0270657	0.577465	0.936288	426	-0.115412	0.123942	0.553077	179	0.0211824	0.723209	0.881925	282	0.031014	0.662066	0.949614	201	0.103584	0.0549365	0.301889	344
BRAT1_221927	-0.0467644	0.499278	0.999491	211	0.0321338	0.50832	0.920288	426
BRCA1_672	-0.0434604	0.531093	0.999491	210	0.00798168	0.870447	0.984988	420	-0.113696	0.129668	0.561709	179	-0.151864	0.0103815	0.116445	284	0.0208353	0.769079	0.968617	201	-0.0160088	0.767339	0.911698	344
BRCA2_675	-0.105778	0.12651	0.999491	210	-0.0052752	0.914164	0.990242	420	-0.193654	0.0095969	0.248491	178	-0.0611318	0.30632	0.601087	282	-0.0648197	0.360607	0.863578	201	-0.0453553	0.401702	0.718229	344
BRCC3_79184	0.093011	0.179361	0.999491	210	0.0867149	0.075869	0.679059	420	-0.0651409	0.378348	0.774471	185	-0.0351082	0.55222	0.781429	289	0.0406921	0.566272	0.930819	201	0.0149348	0.782543	0.918237	344
BRD1_23774	0.0453346	0.513514	0.999491	210	0.0512106	0.29507	0.847156	420	-0.106782	0.154821	0.597125	179	-0.100202	0.0919038	0.335813	284	-0.149815	0.0337755	0.588263	201	-0.0906434	0.0932453	0.389025	344
BRD2_6046	-0.097432	0.159473	0.999491	210	-0.035148	0.472514	0.908823	420	0.0422989	0.567536	0.867244	185	0.028942	0.624145	0.825771	289	0.145466	0.0393559	0.60281	201	0.0107106	0.843096	0.943379	344
BRD3_8019	0.0831834	0.230012	0.999491	210	0.0272849	0.577109	0.936249	420	-0.0525939	0.484419	0.83392	179	-0.184299	0.00181513	0.0489326	284	-0.0215321	0.761584	0.967959	201	-0.13815	0.0103091	0.140943	344
BRD4_23476	0.086288	0.213024	0.999491	210	-0.0649404	0.184073	0.785521	420	-0.0553587	0.461715	0.821548	179	-0.126837	0.0326216	0.195754	284	0.142529	0.0435479	0.607325	201	-0.00878811	0.870987	0.954422	344
BRD7P3_23629									0.0121998	0.871239	0.970545	179	-0.0136552	0.818778	0.927813	284
BRD7_29117	-0.0466607	0.50126	0.999491	210	-0.0234593	0.631651	0.947659	420	-0.05803	0.440351	0.811662	179	-0.0450421	0.44959	0.71128	284	0.0849502	0.384309	0.876186	107	-0.0632906	0.381886	0.7029	193
BRD8_10902	0.0387546	0.576527	0.999491	210	-0.0251979	0.606591	0.941539	420	-0.0342698	0.648806	0.895674	179	-0.0669821	0.260552	0.556929	284	-0.00575388	0.935389	0.990512	201	-0.0717894	0.184058	0.526501	344
BRD9_65980	0.108177	0.118083	0.999491	210	-0.0264822	0.588369	0.939045	420	-0.0554751	0.460773	0.820864	179	0.0184347	0.757076	0.898331	284	0.00231249	0.98114	0.997776	107	0.0881451	0.222856	0.566264	193
BRDT_676	0.011206	0.871758	0.999491	210	-0.000422626	0.99311	0.999946	420	-0.04523	0.547704	0.860677	179	-0.0910678	0.125741	0.390643	284	0.0103514	0.884044	0.983757	201	0.0655156	0.225507	0.568751	344
BRF1_2972	-0.047474	0.493821	0.999491	210	-0.0363403	0.457615	0.902523	420									-0.000797732	0.991033	0.998891	201	-0.0739017	0.171452	0.510343	344
BRF2_55290	-0.0427404	0.536948	0.999491	211	-0.0161689	0.739313	0.964906	426									0.0701402	0.322454	0.856403	201	0.0930193	0.0849414	0.37043	344
BRI3BP_140707	-0.0096437	0.889249	0.999491	211	-0.00328026	0.94618	0.993329	426
BRI3_25798	0.00738526	0.915074	0.999491	211	-0.00204573	0.96642	0.996845	426	-0.0404885	0.591545	0.876549	178	-0.0270585	0.650942	0.838247	282	-0.00128725	0.98553	0.998091	201	0.0955911	0.0766348	0.353723	344
BRICD5_283870	0.00254674	0.970665	0.999491	211	0.015991	0.742078	0.964906	426
BRINP1_1620	-0.024652	0.721827	0.999491	211	0.0152211	0.754086	0.965835	426
BRINP2_57795	0.000671723	0.992261	0.999963	211	0.0326772	0.501172	0.917826	426									0.0658211	0.50057	0.916117	107	0.0775435	0.283771	0.625345	193
BRINP3_339479	0.054993	0.426802	0.999491	211	0.0382439	0.431098	0.891465	426									0.194157	0.0450814	0.607379	107	0.105775	0.143185	0.471605	193
BRIP1_83990	0.00613436	0.929417	0.999491	211	0.0172629	0.722378	0.962843	426	0.133181	0.0755218	0.469929	179	0.142521	0.0166229	0.140304	282	-0.00997237	0.888261	0.984775	201	0.0286534	0.596378	0.837147	344
BRIX1_55299	0.0711677	0.30351	0.999491	211	-0.0509228	0.29435	0.847156	426	-0.134792	0.0720213	0.466627	179	-0.0864103	0.147802	0.423848	282	-0.0348178	0.721814	0.959366	107	0.0653125	0.366834	0.690906	193
BRK1_55845	0.0221953	0.748567	0.999491	211	0.0468198	0.335026	0.864464	426									0.102162	0.295051	0.843265	107	0.0640156	0.376446	0.699263	193
BRMS1L_84312	-0.0346402	0.616836	0.999491	211	0.0540728	0.265457	0.834022	426	0.0177751	0.813303	0.952423	179	0.0713053	0.230962	0.523358	284	0.103328	0.289546	0.84103	107	-0.0445986	0.537983	0.804814	193
BRMS1_25855	0.0697539	0.313242	0.999491	211	0.0631754	0.193124	0.794012	426	-0.186133	0.012607	0.271732	179	-0.0796207	0.180897	0.470226	284	0.0393227	0.579419	0.933029	201	0.0460631	0.394388	0.712636	344
BROX_148362	-0.00343568	0.960433	0.999491	211	-0.00432771	0.929033	0.990788	426									0.193512	0.0458128	0.607379	107	0.110479	0.126132	0.444099	193
BRPF1_7862	0.0354525	0.609456	0.999491	210	-0.0143949	0.768649	0.969047	420	-0.00136601	0.985521	0.996325	179	0.0545317	0.35987	0.644357	284	0.00710383	0.920275	0.989814	201	0.110351	0.0408042	0.261743	344
BRPF3_27154	0.0095492	0.89059	0.999491	210	-0.0177683	0.716542	0.962539	420	-0.0756434	0.314227	0.736711	179	-0.134639	0.0232491	0.165546	284	0.0141417	0.842065	0.978031	201	-0.0820006	0.129038	0.448928	344
BRS3_680	0.0258782	0.708604	0.999491	211	0.0355999	0.463652	0.904971	426	0.0183385	0.808034	0.950751	178	-0.0139917	0.81504	0.925127	282	0.0585341	0.409147	0.884604	201	0.139404	0.00963121	0.137104	344
BRSK1_84446	-0.0600696	0.385306	0.999491	211	-0.089493	0.0649806	0.666528	426	-0.0704221	0.348889	0.756701	179	-0.0264476	0.657177	0.843196	284	0.173962	0.0135183	0.50306	201	0.0721908	0.181611	0.522296	344
BRSK2_9024	-0.031805	0.645972	0.999491	211	-0.045667	0.347075	0.868349	426	-0.208071	0.00519068	0.199979	179	-0.136141	0.0217413	0.160247	284	-0.0638436	0.3679	0.866755	201	-0.0479516	0.375271	0.698718	344
BRWD1_54014	0.0322431	0.642233	0.999491	210	0.0511756	0.2954	0.847156	420	-0.196476	0.00838903	0.235572	179	-0.204808	0.000514392	0.0256007	284	0.0549505	0.438467	0.893894	201	0.030352	0.57478	0.825515	344
BRWD3_254065	-0.00845892	0.903016	0.999491	210	-0.050902	0.297993	0.847353	420	-0.092256	0.219344	0.663338	179	0.0130607	0.82654	0.930893	284	0.0405269	0.678537	0.953169	107	0.0287583	0.69136	0.881722	193
BSCL2_26580	-0.070722	0.306557	0.999491	211	0.0750002	0.122197	0.738524	426
BSDC1_55108	0.0281623	0.684205	0.999491	211	0.0497767	0.305365	0.847511	426									-0.0407548	0.67683	0.953169	107	-0.039313	0.587256	0.832303	193
BSG_682	0.00747405	0.914056	0.999491	211	0.0293625	0.545588	0.924571	426	0.0191856	0.798791	0.949078	179	-0.00524799	0.929836	0.973621	284	0.0156113	0.825901	0.976427	201	-0.0931742	0.0844213	0.369598	344
BSND_7809	-0.0570866	0.409384	0.999491	211	-0.0401338	0.408661	0.886001	426									-0.132798	0.0602006	0.637407	201	-0.11492	0.0331088	0.238892	344
BSN_8927	-0.0568343	0.411461	0.999491	211	-0.00737017	0.879444	0.98639	426									-0.0545713	0.576656	0.932708	107	-0.00203672	0.977573	0.992166	193
BSPH1_100131137	-0.0040122	0.953801	0.999491	211	-0.0648093	0.181837	0.784085	426
BSPRY_54836	-0.0118652	0.863961	0.999491	211	-0.0303917	0.531591	0.923065	426									-0.0793679	0.416431	0.886826	107	0.0927945	0.199303	0.54472	193
BST1_683	0.0563212	0.415703	0.999491	211	-0.0473609	0.329464	0.860685	426									0.0466657	0.510646	0.918533	201	0.0884549	0.101456	0.403298	344
BST2_684	0.0240099	0.728785	0.999491	211	0.0297953	0.53968	0.924248	426									0.0889996	0.208967	0.795009	201	0.0655937	0.224953	0.568705	344
BSX_390259	0.0280482	0.685416	0.999491	211	0.000279513	0.99541	0.999946	426									-0.149626	0.123991	0.715134	107	-0.0514755	0.477117	0.767688	193
BTAF1_9044	-0.0487486	0.48123	0.999491	211	-0.0810061	0.0949631	0.703317	426	-0.111403	0.137635	0.573236	179	-0.0503622	0.397825	0.674172	284	0.0645515	0.362602	0.864447	201	-0.011473	0.832088	0.93873	344
BTBD10_84280	-0.0758365	0.272805	0.999491	211	0.019782	0.683909	0.956003	426									0.169824	0.0803309	0.667222	107	0.060634	0.402225	0.718397	193
BTBD11_121551	-0.045088	0.5148	0.999491	211	-0.0873672	0.071642	0.674457	426	-0.0819215	0.276994	0.705003	178	-0.132448	0.0261414	0.175339	282	-0.302886	0.00151858	0.300893	107	-0.188294	0.00873217	0.132166	193
BTBD16_118663	0.0625537	0.365925	0.999491	211	0.0413848	0.394199	0.881789	426									-0.142664	0.142674	0.737328	107	-0.117065	0.104947	0.408928	193
BTBD17_388419	0.00918324	0.894506	0.999491	211	0.0252595	0.603133	0.940106	426	-0.0469805	0.532301	0.855005	179	0.0326609	0.584942	0.801544	282
BTBD18_643376	-0.0268754	0.697913	0.999491	211	-0.0161852	0.73906	0.964906	426	-0.0295804	0.69509	0.911153	178	-0.0969397	0.104271	0.35766	282
BTBD19_149478									-0.0113067	0.880592	0.972286	179	-0.0785837	0.188235	0.477596	282
BTBD1_53339	0.0494607	0.474839	0.999491	211	0.081243	0.093997	0.702323	426	-0.0756524	0.314169	0.736711	179	-0.142789	0.0164178	0.140247	282	0.153085	0.115437	0.702158	107	0.0513569	0.478134	0.768307	193
BTBD2_55643	-0.143199	0.0376674	0.98243	211	-0.0559622	0.249093	0.823447	426	-0.130474	0.08171	0.48521	179	-0.0986951	0.0981171	0.346432	282	-0.0515922	0.597668	0.937095	107	-0.0901935	0.212246	0.556785	193
BTBD3_22903	-0.0518886	0.453404	0.999491	211	-0.0118131	0.807919	0.97654	426	-0.0508225	0.500492	0.841009	178	-0.00413023	0.944949	0.980654	282	-0.0996085	0.30735	0.848742	107	-0.0271906	0.707393	0.887454	193
BTBD6_90135	0.0112215	0.871275	0.999491	211	0.042072	0.386386	0.878599	426	-0.130876	0.0807668	0.483321	179	-0.17653	0.00293304	0.0615552	282	-0.0832943	0.239763	0.814497	201	-0.00370575	0.945402	0.981481	344
BTBD7_55727	0.0510514	0.460733	0.999491	211	0.0774832	0.11028	0.723428	426	-0.180482	0.0159175	0.298159	178	-0.0650774	0.276094	0.571825	282	0.00325094	0.973489	0.99606	107	0.015647	0.829006	0.93788	193
BTBD8_284697	-0.0299017	0.665841	0.999491	211	-0.0416997	0.390607	0.880401	426	-0.0262363	0.727376	0.927287	179	-0.117394	0.0489024	0.240888	282	0.0200325	0.837725	0.978031	107	-0.0169079	0.815465	0.932329	193
BTBD9_114781	0.142608	0.0384726	0.98243	211	0.141984	0.00331609	0.3314	426	0.00971402	0.897312	0.978859	179	-0.0861852	0.148864	0.424277	282	-0.000242134	0.998025	0.999827	107	-0.0477126	0.509951	0.786109	193
BTC_685	0.0162381	0.814608	0.999491	211	0.0164497	0.734953	0.96481	426									0.151586	0.119086	0.706255	107	-0.0159197	0.826073	0.936802	193
BTD_686	-0.135734	0.0489455	0.98243	211	-0.1677	0.00050939	0.192284	426	-0.052133	0.488261	0.834523	179	0.026052	0.661985	0.846047	284	-0.0041788	0.953051	0.992864	201	-0.0479043	0.375743	0.698757	344
BTF3L4_91408	-0.0932995	0.176968	0.999491	211	-0.0627771	0.195951	0.795629	426									-0.0534371	0.451201	0.897329	201	-0.125828	0.0195663	0.187119	344
BTF3P11_690									-0.0331683	0.659377	0.897338	179	-0.127003	0.0323935	0.19573	284
BTF3_689	0.0658068	0.341476	0.999491	211	0.0859242	0.0764739	0.679912	426	0.000794117	0.991582	0.997581	179	-0.0165932	0.780691	0.907714	284	-0.0425616	0.548557	0.925568	201	-0.0321348	0.552515	0.813193	344
BTG1_694	0.030996	0.654387	0.999491	211	0.079704	0.100413	0.707021	426	-0.0606073	0.421602	0.800956	178	-0.0981148	0.100119	0.350113	282	0.141812	0.0446273	0.607379	201	0.124243	0.0211715	0.194825	344
BTG2_7832	-0.0182271	0.792387	0.999491	211	0.0173863	0.720476	0.962684	426	0.039762	0.597179	0.8796	179	0.0964179	0.104915	0.358484	284	-0.162573	0.0211183	0.533474	201	-0.169156	0.00164008	0.0643935	344
BTG3_10950	-0.0369289	0.593744	0.999491	211	-0.0219996	0.650701	0.951225	426									0.002207	0.982	0.997787	107	0.0599846	0.407293	0.721374	193
BTG4_54766	-0.0231111	0.738562	0.999491	211	0.08909	0.0662029	0.666528	426									0.119845	0.218862	0.798819	107	0.110477	0.126139	0.444099	193
BTK_695	-0.0288489	0.676933	0.999491	211	0.0094879	0.845192	0.981325	426	0.0132465	0.860301	0.967005	179	-0.0776048	0.193814	0.482719	282	0.0348427	0.623391	0.942143	201	-0.0613285	0.256626	0.59877	344
BTLA_151888	0.0902084	0.191814	0.999491	211	0.00398147	0.934698	0.991396	426									-0.177395	0.0675554	0.65503	107	-0.15717	0.0290446	0.226451	193
BTN1A1_696	0.024321	0.725411	0.999491	211	-0.0115883	0.811506	0.976894	426	0.146721	0.050666	0.422536	178	0.109446	0.0664668	0.28331	282	-0.00755369	0.915245	0.989785	201	0.0216926	0.688479	0.880629	344
BTN2A1_11120	0.00159152	0.981666	0.999491	211	0.024303	0.616929	0.943975	426	-0.154689	0.0386818	0.388222	179	-0.0589245	0.324147	0.614907	282	0.0830421	0.395117	0.881017	107	0.0833349	0.249235	0.592052	193
BTN2A2_10385	0.0205801	0.766315	0.999491	211	0.0576452	0.235119	0.822159	426									0.0804946	0.409825	0.884604	107	0.105102	0.145762	0.475413	193
BTN3A1_11119	0.00283968	0.967293	0.999491	211	0.072032	0.137734	0.752453	426	-0.1293	0.0785901	0.476983	186	-0.20212	0.000522518	0.0256122	291	0.0303264	0.756496	0.967054	107	0.107518	0.136671	0.461075	193
BTN3A2_11118	0.00861233	0.90103	0.999491	211	0.0847147	0.080725	0.684764	426	0.109362	0.137303	0.572693	186	0.143513	0.0142734	0.130762	291	0.0162201	0.819226	0.975794	201	-0.0106603	0.843824	0.943379	344
BTN3A3_10384	-0.0623	0.367876	0.999491	211	0.0697501	0.150676	0.764485	426	-0.0563356	0.445021	0.814187	186	-0.0520821	0.376032	0.656923	291	-0.124863	0.0773774	0.665116	201	-0.0810764	0.133422	0.456165	344
BTNL2_56244									-0.175876	0.0188605	0.306551	178	-0.198365	0.000809092	0.032967	282	0.0590161	0.545961	0.925568	107	0.0664654	0.358418	0.684988	193
BTNL3_10917	-0.0913911	0.18603	0.999491	211	-0.0643956	0.184647	0.786404	426	-0.0693107	0.347202	0.755701	186	-0.0130767	0.824219	0.929674	291	0.0354526	0.617321	0.941326	201	0.133651	0.0131021	0.156135	344
BTNL8_79908	0.114649	0.0967203	0.999491	211	0.00539485	0.911599	0.990242	426	-0.108203	0.141544	0.577228	186	0.00741188	0.899815	0.961418	291	0.0301155	0.758137	0.967805	107	0.00624646	0.931295	0.975901	193
BTNL9_153579	0.0243526	0.725069	0.999491	211	0.0330163	0.496738	0.916308	426	-0.0319327	0.665248	0.899388	186	-0.0455078	0.439307	0.706197	291	-0.193737	0.045557	0.607379	107	-0.142993	0.0472749	0.281694	193
BTRC_8945	-0.126506	0.0666444	0.987144	211	0.0068037	0.888648	0.98725	426	-0.0765786	0.308264	0.73266	179	-0.0872851	0.142303	0.416674	284	0.0464402	0.512693	0.918947	201	-0.131542	0.0146275	0.164776	344
BUB1B-PAK6&PAK6_106821730&56924									-0.0931862	0.207084	0.649586	185	-0.0593164	0.314948	0.606325	289	-0.0556481	0.432667	0.891713	201	0.0138567	0.797889	0.924483	344
BUB1B_701	-0.0376647	0.586404	0.999491	211	-0.0338481	0.48595	0.911715	426	0.0430374	0.559715	0.864226	186	0.0846461	0.149775	0.425528	291	-0.0933186	0.187622	0.782928	201	-0.0057826	0.914899	0.969094	344
BUB1_699	-0.0477399	0.491402	0.999491	210	0.0165494	0.735233	0.96485	420	0.201999	0.00582735	0.211242	185	0.0372549	0.528167	0.767026	289	0.158042	0.0250417	0.548462	201	0.101902	0.0590197	0.313113	344
BUB3_9184	-0.0452412	0.513372	0.999491	211	-0.0259451	0.593329	0.939141	426	0.0365916	0.626757	0.886056	179	0.0358185	0.547737	0.777713	284	-0.10289	0.14609	0.738396	201	-0.0642646	0.23451	0.576892	344
BUD13_84811	0.0281486	0.68435	0.999491	211	-0.0328176	0.499333	0.916808	426									0.0449559	0.526273	0.923224	201	0.00321597	0.952609	0.98421	344
BUD23_114049	0.11736	0.0898048	0.999491	210	0.0377903	0.439854	0.894974	420									-0.126764	0.193219	0.784959	107	-0.0477687	0.509453	0.785756	193
BUD31_8896	-0.0709076	0.305285	0.999491	211	-0.0318291	0.512351	0.921949	426	-0.0222659	0.767347	0.939885	179	-0.0372878	0.531426	0.769169	284	-0.048453	0.494571	0.915235	201	-0.0277401	0.608141	0.842471	344
BVES_11149	-0.000403781	0.995348	0.999963	211	0.0260676	0.591586	0.939141	426									-0.0400826	0.68187	0.953365	107	0.00738024	0.918864	0.970411	193
BYSL_705	-0.0161427	0.815677	0.999491	211	0.0344357	0.478408	0.911418	426									-0.0299834	0.759165	0.967805	107	0.00951414	0.895523	0.962965	193
BZW1_9689	0.00822506	0.905459	0.999491	211	-0.091833	0.0582453	0.652237	426									-0.0525903	0.59059	0.934786	107	-0.107417	0.137041	0.461533	193
BZW2_28969	0.0120943	0.861361	0.999491	211	0.150809	0.0018	0.280151	426									-0.0301894	0.757562	0.967805	107	-0.0422225	0.559878	0.81792	193
C10orf105_414152	-0.0379224	0.583843	0.999491	211	-0.0414739	0.393181	0.881438	426
C10orf10_11067																	-0.0344024	0.62779	0.943551	201	0.0260674	0.629947	0.852911	344
C10orf111_221060																	-0.00623663	0.949165	0.992152	107	0.0930464	0.198081	0.543805	193
C10orf113_387638	0.0452498	0.513291	0.999491	211	0.0136896	0.778148	0.97038	426									0.0125197	0.898158	0.985412	107	-0.101468	0.160285	0.496225	193
C10orf120_399814	0.0454911	0.511045	0.999491	211	0.0293097	0.54631	0.924746	426									-0.0284312	0.771281	0.969228	107	0.021581	0.76578	0.911212	193
C10orf25_220979																	-0.0700245	0.473552	0.905448	107	-0.00205625	0.977358	0.992166	193
C10orf53_282966	0.00611897	0.929594	0.999491	211	-0.0334249	0.491423	0.914753	426									-0.0447351	0.647285	0.946989	107	0.0119924	0.868529	0.953569	193
C10orf55_414236	-0.0927717	0.179441	0.999491	211	-0.00798122	0.869535	0.984977	426
C10orf62_414157	0.111427	0.106532	0.999491	211	-0.0167536	0.730245	0.964022	426
C10orf67_256815	0.0669472	0.333158	0.999491	211	-0.00292366	0.952023	0.994506	426
C10orf71_118461	0.0547887	0.428524	0.999491	211	0.0171242	0.724518	0.963207	426									-0.149988	0.123074	0.713699	107	-0.245143	0.00059016	0.0431796	193
C10orf76_79591																	-0.152993	0.115658	0.702158	107	-0.132248	0.0667461	0.329425	193
C10orf82_143379	-0.141912	0.0394393	0.98243	211	0.0241252	0.619508	0.944942	426
C10orf88_80007	0.096585	0.162139	0.999491	211	0.0734251	0.130263	0.7453	426
C10orf90_118611	0.0757407	0.273414	0.999491	211	-0.0184888	0.703563	0.960197	426
C10orf99_387695	-0.0569331	0.410647	0.999491	211	0.0592508	0.222312	0.810536	426									0.0232805	0.811866	0.974866	107	-0.0226187	0.754867	0.908215	193
C11orf16_56673	-0.025385	0.713912	0.999491	211	-0.0622919	0.199436	0.796207	426									0.163158	0.0931198	0.681865	107	0.0396948	0.583629	0.830393	193
C11orf1_64776	-0.0458948	0.507298	0.999491	211	0.0336387	0.488655	0.912683	426									-0.0968001	0.321257	0.856403	107	-0.0413836	0.567709	0.821978	193
C11orf21_29125	-0.0769861	0.265581	0.999491	211	-0.0680553	0.160872	0.772803	426
C11orf24_53838	-0.032742	0.636279	0.999491	211	-0.00605145	0.900892	0.989035	426	0.0117793	0.875641	0.972189	179	-0.0693871	0.245466	0.538392	282	0.0980958	0.165925	0.762625	201	0.13897	0.00986137	0.138374	344
C11orf40_143501	-0.0716542	0.300208	0.999491	211	-0.0868676	0.0732858	0.676447	426									-0.146171	0.133013	0.729267	107	-0.03194	0.659246	0.866728	193
C11orf42_160298	-0.0183591	0.790917	0.999491	211	-0.0108481	0.823341	0.978148	426									-0.139067	0.153127	0.747316	107	-0.0222932	0.758286	0.908869	193
C11orf45_219833	-0.0267115	0.699666	0.999491	211	0.0631678	0.193177	0.794051	426									-0.0361299	0.610611	0.94006	201	0.0363526	0.501578	0.781181	344
C11orf49_79096	0.122196	0.0765448	0.987144	211	0.0502894	0.300404	0.847511	426									-0.0175288	0.857778	0.97998	107	0.0760573	0.29313	0.632362	193
C11orf52_91894	-0.0187787	0.786253	0.999491	211	0.0344277	0.47851	0.911418	426
C11orf53_341032	-0.021072	0.760897	0.999491	211	-0.0344242	0.478554	0.911418	426
C11orf54_28970	0.0176804	0.798479	0.999491	211	0.0421928	0.385023	0.878185	426
C11orf57_55216																	-0.0864864	0.375739	0.870952	107	0.0119161	0.869357	0.953903	193
C11orf58_10944	-0.11408	0.0983997	0.999491	211	-0.0310062	0.523321	0.922355	426									-0.164972	0.0894899	0.67819	107	-0.14056	0.0512084	0.291538	193
C11orf63_79864																	-0.0844111	0.387344	0.877258	107	-0.176133	0.0142771	0.163285	193
C11orf65_160140	0.020614	0.765941	0.999491	211	0.0355651	0.46409	0.90515	426
C11orf68_83638	-0.0580467	0.401539	0.999491	211	-0.0236007	0.627145	0.946765	426
C11orf70_85016									-0.0501885	0.504649	0.843478	179	-0.00223659	0.970066	0.990414	284	-0.168731	0.0823266	0.671199	107	-0.0640941	0.37586	0.698757	193
C11orf71_54494	0.0282874	0.682878	0.999491	211	0.0266714	0.583025	0.937728	426									-0.197169	0.00502363	0.419815	201	-0.170111	0.00154167	0.0622427	344
C11orf74_119710	0.0168347	0.807925	0.999491	211	0.0379352	0.434829	0.892858	426									0.067256	0.491258	0.913258	107	0.0949669	0.188939	0.53341	193
C11orf80_79703	-0.0327989	0.635693	0.999491	211	0.049911	0.30406	0.847511	426									-0.351289	0.000207214	0.197016	107	-0.0985994	0.1725	0.511275	193
C11orf86_254439	0.0733909	0.288616	0.999491	211	-0.0303586	0.532038	0.923065	426
C11orf87_399947	-0.028612	0.679439	0.999491	211	-0.0559088	0.249545	0.824027	426
C11orf88_399949	-0.0609864	0.378082	0.999491	211	-0.0487789	0.315174	0.85249	426
C11orf91_100131378	0.063221	0.360823	0.999491	211	0.0380911	0.432943	0.892137	426
C11orf94_143678	-0.144517	0.0359238	0.98243	211	-0.0491916	0.311092	0.850849	426
C11orf95_65998																	-0.0327548	0.737679	0.963682	107	-0.025294	0.726963	0.895608	193
C11orf98_102288414																	0.030312	0.669259	0.951857	201	-0.0757534	0.16094	0.496328	344
C12orf10_60314	-0.0418914	0.545074	0.999491	211	0.0209612	0.666171	0.953758	426									-0.12743	0.190872	0.782928	107	-0.128517	0.0748782	0.349564	193
C12orf29_91298	0.0575189	0.405841	0.999491	211	-0.0167742	0.729927	0.964022	426									0.0647113	0.507836	0.918173	107	-0.0379978	0.599831	0.838594	193
C12orf40_283461	0.0167319	0.809076	0.999491	211	-0.076017	0.117201	0.730494	426									-0.151219	0.119992	0.706376	107	-0.0640754	0.375999	0.698757	193
C12orf42_374470	0.0692315	0.316888	0.999491	211	0.0145397	0.764765	0.967758	426
C12orf43_64897	0.0860192	0.213357	0.999491	211	0.051398	0.289861	0.846719	426
C12orf45_121053	0.0117348	0.865442	0.999491	211	0.069919	0.149688	0.764485	426									-0.184017	0.0577801	0.631906	107	-0.0178878	0.804977	0.927223	193
C12orf49_79794	0.0363678	0.599369	0.999491	211	-0.0302204	0.533909	0.923421	426									-0.013777	0.846087	0.978597	201	-0.0356951	0.509353	0.785756	344
C12orf4_57102	0.0796141	0.249559	0.999491	211	0.0385738	0.427131	0.890847	426									-0.126166	0.195346	0.784959	107	0.0240897	0.739483	0.901749	193
C12orf50_160419	-0.0630195	0.362359	0.999491	211	0.0613505	0.206327	0.801143	426
C12orf54_121273	0.0148729	0.829947	0.999491	211	-0.00420081	0.931109	0.990788	426									0.0594237	0.543187	0.925568	107	0.00537468	0.940865	0.979454	193
C12orf56_115749	0.0125451	0.856247	0.999491	211	-0.0539645	0.266417	0.834436	426
C12orf57_113246	0.0578405	0.403217	0.999491	211	0.0300044	0.536837	0.923561	426
C12orf60_144608	0.089643	0.194625	0.999491	211	0.0283809	0.559105	0.928647	426									0.0914123	0.34905	0.860601	107	0.048864	0.499781	0.78041	193
C12orf65_91574	-0.0603946	0.382735	0.999491	211	-0.0753574	0.120424	0.736401	426
C12orf66_144577	-0.000318823	0.996327	0.999963	211	0.0327436	0.500301	0.917098	426									0.00792988	0.93539	0.990512	107	0.116839	0.105624	0.409661	193
C12orf71_728858	0.0205974	0.766124	0.999491	211	0.0386106	0.42669	0.890486	426
C12orf73_728568	0.0278162	0.687882	0.999491	211	-0.0222386	0.647163	0.950495	426
C12orf74_338809	-0.132239	0.0551237	0.983399	211	-0.000190181	0.996877	0.999949	426
C12orf75_387882	0.111908	0.105018	0.999491	211	0.0199489	0.681387	0.955608	426
C12orf76_400073	0.083131	0.229187	0.999491	211	0.0282785	0.560524	0.929538	426
C14orf105_55195																	-0.0193048	0.843543	0.978031	107	-0.0150511	0.835424	0.939747	193
C14orf119_55017	0.104251	0.131183	0.999491	211	0.0508874	0.294686	0.847156	426									0.118582	0.223792	0.801375	107	0.0467426	0.518601	0.791939	193
C14orf132_56967																	0.123987	0.0794946	0.666253	201	0.157055	0.00349488	0.0864407	344
C14orf159_80017																	-0.0309126	0.75194	0.966272	107	-0.0865662	0.231286	0.573272	193
C14orf166_51637																	-0.190738	0.00668264	0.427358	201	-0.129276	0.0164369	0.174857	344
C14orf177_283598	-0.0408024	0.555584	0.999491	211	-0.0506103	0.297327	0.847156	426
C14orf180_400258	0.155995	0.0234277	0.98243	211	0.02871	0.554554	0.926992	426
C14orf28_122525	-0.0313516	0.650682	0.999491	211	0.0230605	0.635053	0.947884	426									0.065219	0.504505	0.917827	107	0.155695	0.0306072	0.231935	193
C14orf2_9556																	-0.176832	0.0684441	0.65731	107	-0.0556426	0.442139	0.747293	193
C14orf39_317761	-0.0361026	0.602035	0.999491	211	-0.0416956	0.390654	0.880401	426									-0.0714303	0.313612	0.851459	201	-0.140435	0.00910381	0.133962	344
C14orf79_122616																	0.160827	0.0979538	0.687247	107	0.133279	0.0646311	0.324083	193
C14orf93_60686	-0.118329	0.0864098	0.999491	211	0.0250428	0.606246	0.941539	426									-0.0528081	0.456553	0.898318	201	-0.0649694	0.229407	0.572004	344
C15orf38-AP3S2_100526783																	-0.224761	0.0013375	0.287305	201	-0.203867	0.000140392	0.0189766	344
C15orf39_56905	-0.008932	0.897376	0.999491	211	0.0208006	0.668575	0.953758	426									0.0615017	0.529151	0.923782	107	0.0740308	0.306217	0.643747	193
C15orf40_123207	-0.0333499	0.630025	0.999491	211	0.056942	0.240889	0.822159	426
C15orf41_84529	-0.0567114	0.412475	0.999491	211	-0.0722126	0.136747	0.752453	426
C15orf48_84419	-0.193517	0.00478717	0.98243	211	-0.0476149	0.326874	0.858974	426									0.135337	0.164561	0.761673	107	0.117374	0.104026	0.406478	193
C15orf53_400359	0.0220936	0.74968	0.999491	211	0.0804269	0.0973574	0.704508	426
C15orf54_400360																	0.0399154	0.683126	0.953691	107	0.153033	0.0336093	0.240654	193
C15orf61_145853	0.0581669	0.400563	0.999491	211	0.0423081	0.383725	0.877883	426									0.0260736	0.789788	0.971804	107	-0.0667273	0.356522	0.683271	193
C15orf62_643338	0.134406	0.0512226	0.983399	211	0.033292	0.493148	0.915178	426
C15orf65_145788	-0.0169482	0.806656	0.999491	211	0.0535024	0.270539	0.837141	426	0.136656	0.0681393	0.463802	179	0.115497	0.0526958	0.249406	282
C16orf45_89927	0.0175945	0.799436	0.999491	211	-0.0597622	0.21834	0.806758	426									0.0665987	0.495512	0.915772	107	0.0273901	0.705345	0.886878	193
C16orf46_123775	0.000485513	0.994406	0.999963	211	0.0251471	0.604746	0.94112	426									-0.040371	0.679706	0.953169	107	-0.0409678	0.571609	0.823494	193
C16orf47_388289																	-0.0448787	0.646229	0.946989	107	0.0928221	0.199169	0.54472	193
C16orf54_283897	0.00494907	0.943029	0.999491	211	-0.0619854	0.201661	0.79815	426
C16orf58_64755	0.0281633	0.684194	0.999491	211	0.0687493	0.156636	0.769619	426									0.19883	0.0400627	0.60281	107	0.137124	0.0572236	0.309085	193
C16orf62_57020																	0.151815	0.118522	0.706255	107	-0.0843845	0.243302	0.586128	193
C16orf70_80262	-0.120456	0.0808636	0.991144	211	-0.0564063	0.24535	0.822159	426
C16orf71_146562	-0.0211259	0.760304	0.999491	211	0.0384816	0.428238	0.891063	426									-0.0238015	0.807736	0.974186	107	0.0711148	0.325713	0.658619	193
C16orf72_29035	0.0480057	0.487945	0.999491	211	0.0294209	0.544788	0.9244	426
C16orf74_404550	-0.0384293	0.578821	0.999491	211	0.0455326	0.348498	0.868464	426
C16orf78_123970	0.129294	0.0608174	0.983399	211	0.0420955	0.386122	0.87852	426									-0.0944356	0.333274	0.858398	107	0.0251553	0.728401	0.895864	193
C16orf82_162083																	0.0571062	0.559052	0.928653	107	0.0286658	0.692303	0.881991	193
C16orf86_388284	0.0328204	0.635472	0.999491	211	-0.0192801	0.691511	0.957701	426
C16orf87_388272	0.0802713	0.24566	0.999491	211	-0.00208174	0.965829	0.996845	426									-0.177745	0.0670073	0.653117	107	-0.0704696	0.330133	0.662417	193
C16orf89_146556	0.00929584	0.89322	0.999491	211	0.0734877	0.129935	0.745255	426									0.0129885	0.894366	0.984775	107	-0.0908075	0.209138	0.55471	193
C16orf90_646174	0.00503609	0.942029	0.999491	211	0.00237473	0.961023	0.996059	426
C16orf91_283951	-0.109828	0.111682	0.999491	211	-0.012383	0.798846	0.974463	426
C16orf92_146378	-0.0325817	0.637934	0.999491	211	-0.0850143	0.0796545	0.682598	426
C16orf95_100506581	0.058448	0.398286	0.999491	211	0.0444422	0.360174	0.870304	426
C16orf96_342346	-0.0410356	0.553325	0.999491	211	-0.009389	0.846785	0.981325	426
C17orf102_400591																	-0.187307	0.0533717	0.626663	107	-0.106581	0.140143	0.466797	193
C17orf107_100130311	0.167512	0.0148493	0.98243	211	0.00675326	0.889468	0.987365	426
C17orf47_284083	0.0772516	0.263931	0.999491	211	-0.00303576	0.950186	0.993829	426
C17orf49_124944	0.144465	0.0364399	0.98243	210	0.0914047	0.0612653	0.660719	420
C17orf50_146853	0.0722019	0.296519	0.999491	211	0.0314722	0.517094	0.922024	426
C17orf51_339263	-0.111751	0.105508	0.999491	211	-0.0967923	0.0458698	0.627572	426									0.0323284	0.648682	0.947035	201	-0.00832403	0.877745	0.95656	344
C17orf53_78995	0.0157779	0.819771	0.999491	211	-0.0433367	0.372259	0.873763	426
C17orf58_284018	0.0313328	0.650878	0.999491	211	0.0156134	0.74796	0.965043	426	0.0572475	0.446551	0.81437	179	-0.00940326	0.874637	0.950958	284
C17orf62_79415									-0.212055	0.004376	0.183787	179	-0.144589	0.0150965	0.13407	282
C17orf64_124773	-0.033839	0.625012	0.999491	211	-0.0110017	0.820881	0.977558	426									0.0880689	0.367033	0.866197	107	0.0645937	0.372143	0.696365	193
C17orf67_339210	-0.0224434	0.745852	0.999491	211	0.0604016	0.213445	0.804004	426
C17orf75_64149	0.0271029	0.695482	0.999491	211	0.0441116	0.363762	0.871144	426									-0.245214	0.000450553	0.239461	201	-0.121911	0.0237391	0.203905	344
C17orf77_146723																	-0.10731	0.271261	0.831941	107	-0.0529569	0.464513	0.760773	193
C17orf78_284099	0.0891409	0.197147	0.999491	211	0.0583804	0.229192	0.816262	426									-0.00237797	0.980606	0.997685	107	-0.182667	0.0110021	0.144292	193
C17orf80_55028	0.0994153	0.150128	0.999491	211	0.0889388	0.066666	0.66736	426	-0.10645	0.149255	0.588085	185	-0.0691403	0.24132	0.534733	289	0.0114431	0.906875	0.987373	107	-0.000589531	0.993508	0.997601	193
C17orf82_388407									-0.0515491	0.493152	0.836575	179	-0.0674461	0.257257	0.552849	284
C17orf97_400566	-0.0157539	0.82004	0.999491	211	0.0479263	0.323717	0.857492	426									-0.0440283	0.652493	0.947897	107	0.0162442	0.822586	0.935328	193
C17orf98_388381	0.0427158	0.537183	0.999491	211	0.0943937	0.0515482	0.646162	426
C17orf99_100141515	0.133977	0.0519754	0.983399	211	0.0667835	0.168858	0.779303	426	-0.1137	0.130746	0.564009	178	-0.0863894	0.1479	0.423944	282	0.00145695	0.988117	0.998248	107	-0.121173	0.0932216	0.389023	193
C18orf21_83608	0.0701457	0.310524	0.999491	211	0.0966903	0.0461	0.627572	426
C18orf25_147339	0.0991271	0.151319	0.999491	211	0.0144387	0.766352	0.968251	426									-0.0321695	0.7422	0.96423	107	-0.108307	0.133798	0.456943	193
C18orf32_497661	0.00330823	0.9619	0.999491	211	-0.0303874	0.531649	0.923065	426
C18orf54_162681	-0.0545753	0.430327	0.999491	211	-0.0544533	0.262104	0.831851	426
C18orf63_644041	-0.0147192	0.831678	0.999491	211	-0.0759178	0.117681	0.730687	426
C18orf8_29919									0.0206227	0.784078	0.944407	179	-0.0454531	0.44546	0.709293	284	0.0331637	0.640233	0.946102	201	0.116521	0.0307226	0.232064	344
C19orf12_83636	-0.15968	0.0203077	0.98243	211	-0.1096	0.0236801	0.538356	426	0.000200623	0.997832	0.999281	186	0.0817149	0.164444	0.447897	291	-0.234135	0.0152113	0.506665	107	-0.094889	0.189304	0.533882	193
C19orf18_147685	0.110367	0.109925	0.999491	211	-0.00184814	0.969661	0.997571	426									0.0128035	0.895862	0.985126	107	-0.0379189	0.60059	0.838991	193
C19orf24_55009	0.0320832	0.643087	0.999491	211	0.000360479	0.994081	0.999946	426
C19orf25_148223	-0.0187938	0.786085	0.999491	211	-0.0421608	0.385384	0.878237	426
C19orf33_64073	-0.150793	0.0285296	0.98243	211	-0.112471	0.0202368	0.529106	426
C19orf35_374872																	-0.128672	0.186547	0.782928	107	-0.00442994	0.951245	0.983687	193
C19orf38_255809	-0.0501523	0.468677	0.999491	211	0.0442275	0.362502	0.870304	426
C19orf44_84167	0.161955	0.0185667	0.98243	211	0.0369048	0.447417	0.898543	426
C19orf47_126526	-0.0581554	0.400656	0.999491	211	-0.046938	0.333806	0.863663	426
C19orf48_84798																	-0.0677198	0.339475	0.858514	201	0.0136043	0.801493	0.926177	344
C19orf53_28974	0.0844912	0.221631	0.999491	211	0.00729894	0.880601	0.98639	426									0.263028	0.00619649	0.421727	107	0.204772	0.00428147	0.0945139	193
C19orf54_284325	-0.0460646	0.505727	0.999491	211	-0.0521539	0.282817	0.843478	426
C19orf57_79173	0.0972078	0.159436	0.999491	211	0.0399885	0.410362	0.886001	426
C19orf66_55337	-0.00826142	0.905043	0.999491	211	0.0397788	0.412823	0.886001	426
C19orf67_646457	0.059641	0.388711	0.999491	211	0.000651836	0.989297	0.999923	426
C19orf68_374920																	0.0749715	0.442794	0.893902	107	0.06847	0.344073	0.673318	193
C19orf70_125988	0.0302091	0.662615	0.999491	211	-0.0665149	0.170582	0.780498	426
C19orf71_100128569	-0.0134204	0.846337	0.999491	211	0.0582598	0.230157	0.816887	426
C19orf73_55150	-0.158174	0.0215361	0.98243	211	-0.0568689	0.241494	0.822159	426
C19orf81_342918	-0.0279829	0.68611	0.999491	211	-0.082682	0.0882983	0.696697	426
C19orf84_147646	-0.0634756	0.358888	0.999491	211	-0.0546813	0.260108	0.830404	426
C1D_10438	0.0305704	0.658832	0.999491	211	0.0893162	0.0655143	0.666528	426									-0.10162	0.297635	0.843265	107	-0.0309256	0.66942	0.871491	193
C1GALT1C1_29071	-0.0670146	0.33267	0.999491	211	-0.0543659	0.262871	0.831851	426									0.0331697	0.640173	0.946102	201	-0.0507766	0.34776	0.676272	344
C1GALT1_56913	-0.0331067	0.632525	0.999491	211	-0.0278121	0.567011	0.931937	426									0.0881858	0.213176	0.797533	201	0.049369	0.361304	0.687279	344
C1QA_712	0.00784212	0.909842	0.999491	211	-0.0937446	0.0531818	0.648988	426	-0.121502	0.105187	0.52918	179	-0.0978052	0.1012	0.352277	282	0.088025	0.214015	0.798214	201	-0.0691924	0.200478	0.546358	344
C1QBP_708	0.0137134	0.843398	0.999491	210	-0.0438901	0.369595	0.872534	420	-0.109917	0.142997	0.578943	179	-0.102145	0.0857458	0.324394	284	-0.0769008	0.277893	0.834817	201	-0.130285	0.0156085	0.170102	344
C1QB_713	0.135109	0.0500064	0.983399	211	0.0650973	0.179898	0.783279	426	0.0831335	0.269924	0.699319	178	-0.0335854	0.574356	0.796053	282	0.0185795	0.793483	0.971804	201	-0.0634726	0.240339	0.582876	344
C1QC_714	-0.0179667	0.795286	0.999491	211	0.00399431	0.934488	0.991335	426	0.071725	0.340022	0.753642	179	0.0797727	0.181618	0.470719	282	-0.149359	0.0343271	0.591055	201	-0.186851	0.000494563	0.038363	344
C1QL1_10882	0.137045	0.0467824	0.98243	211	0.0191571	0.69338	0.957718	426	-0.0714241	0.342057	0.754341	179	-0.0554689	0.353377	0.639479	282	-0.00869918	0.929138	0.990322	107	-0.0880751	0.223225	0.56703	193
C1QL2_165257	-0.0537073	0.437708	0.999491	211	-0.00288423	0.952669	0.994806	426	-0.0280607	0.710032	0.918073	178	0.0406342	0.496749	0.746762	282	0.0737017	0.45058	0.896824	107	0.123501	0.0870562	0.375353	193
C1QL3_389941	-0.0580447	0.401555	0.999491	211	0.022625	0.641457	0.948768	426	0.167258	0.0256465	0.337953	178	0.068537	0.251312	0.546082	282	0.106264	0.275988	0.834817	107	-0.0217755	0.763731	0.910657	193
C1QL4_338761	-0.0402625	0.560831	0.999491	211	-0.00305222	0.949916	0.993829	426	-0.128792	0.0866513	0.496083	178	-0.0638224	0.28548	0.581526	282
C1QTNF12_388581	0.0768442	0.266465	0.999491	211	0.0500437	0.302775	0.847511	426	-0.135328	0.071692	0.466627	178	-0.0578247	0.333275	0.622286	282
C1QTNF1_114897	0.116239	0.0921513	0.999491	211	0.0665478	0.17037	0.780321	426	0.00623904	0.93394	0.983171	179	-0.0384161	0.520557	0.761872	282	-0.0513744	0.599217	0.937095	107	0.0352521	0.626465	0.850809	193
C1QTNF2_114898	0.119015	0.0845885	0.996557	211	-0.00257844	0.957682	0.995244	426	-0.0309953	0.680425	0.905783	179	-0.0310513	0.603587	0.811696	282	0.0759223	0.437014	0.892948	107	0.0741363	0.305526	0.642895	193
C1QTNF3-AMACR_100534612									-0.0862473	0.250982	0.690261	179	-0.0761996	0.202033	0.491673	282	-0.0233463	0.811345	0.974866	107	0.0641748	0.375258	0.698718	193
C1QTNF3_114899	0.0844755	0.221718	0.999491	211	0.0228709	0.637837	0.948428	426	-0.0130639	0.862207	0.967504	179	-0.110716	0.0633545	0.275943	282	-0.0163777	0.867029	0.981704	107	-0.13652	0.0583384	0.312049	193
C1QTNF4_114900	-0.0204676	0.767556	0.999491	211	0.00222377	0.963499	0.996529	426
C1QTNF5&MFRP_114902&83552									0.00130261	0.986232	0.996325	178	-0.0689233	0.248644	0.541933	282	0.0628419	0.375479	0.870952	201	-0.0266953	0.621723	0.848287	344
C1QTNF5_114902	0.0119377	0.863138	0.999491	211	0.0077139	0.873868	0.98639	426
C1QTNF6_114904	0.158148	0.0215576	0.98243	211	0.0503406	0.299912	0.847511	426	-0.021724	0.77348	0.941181	178	-0.0961916	0.106984	0.362179	282	-0.0727908	0.456212	0.898318	107	-0.155705	0.0305969	0.231935	193
C1QTNF7_114905	-0.180118	0.00873374	0.98243	211	-0.0461073	0.342441	0.867754	426	0.0737627	0.326444	0.746385	179	-0.0456114	0.445499	0.709293	282	-0.140865	0.147831	0.741145	107	-0.14302	0.0472331	0.281694	193
C1QTNF8_390664	-0.0615477	0.373699	0.999491	211	-0.032803	0.499524	0.916822	426	-0.127893	0.0879853	0.498411	179	-0.119169	0.0455623	0.232129	282	0.106351	0.275591	0.834392	107	0.0590516	0.414641	0.726042	193
C1QTNF9B_387911	-0.153814	0.0254618	0.98243	211	-0.0403761	0.405836	0.886001	426	-0.0411792	0.580986	0.874715	182	-0.0855553	0.148969	0.424296	286	-0.179521	0.0642797	0.646074	107	0.0108117	0.881373	0.95785	193
C1QTNF9_338872	0.00367961	0.957627	0.999491	211	0.0114641	0.813489	0.977154	426	0.0151125	0.839537	0.961693	182	0.0253384	0.669596	0.852495	286	0.102578	0.293079	0.842247	107	-0.0261028	0.718595	0.892322	193
C1RL_51279	-0.05148	0.456972	0.999491	211	-0.0529557	0.275472	0.838392	426									-0.0677825	0.339027	0.858514	201	-0.0774115	0.151945	0.484422	344
C1R_715									-0.076767	0.308446	0.73266	178	-0.0161244	0.787476	0.911625	282	-0.0221674	0.754771	0.966559	201	0.0433266	0.423108	0.733566	344
C1S_716	0.0136594	0.843636	0.999491	211	-0.0408174	0.40072	0.884322	426	-0.154645	0.038737	0.388222	179	-0.12281	0.0393052	0.215733	282	0.0645881	0.36233	0.864447	201	0.0621727	0.250124	0.592756	344
C1orf100_200159	-0.0847402	0.220268	0.999491	211	-0.0179489	0.711828	0.962171	426									-0.0419134	0.668177	0.951786	107	-0.00203185	0.977627	0.992166	193
C1orf105_92346	0.017394	0.801675	0.999491	211	-0.0229116	0.637239	0.948147	426									0.0253653	0.795372	0.971804	107	0.00086203	0.990507	0.996746	193
C1orf109_54955	-0.0450736	0.514934	0.999491	211	0.0679487	0.16153	0.774357	426									-0.00179262	0.985379	0.998007	107	0.113298	0.116691	0.4293	193
C1orf112_55732	-0.0377909	0.585149	0.999491	211	-0.0836586	0.0845914	0.687826	426
C1orf115_79762	0.129069	0.0612711	0.983399	211	0.0607369	0.21091	0.802692	426									-0.0428025	0.661565	0.949614	107	-0.00206092	0.977307	0.992166	193
C1orf116_79098	-0.068476	0.322211	0.999491	211	-0.00241701	0.96033	0.996039	426									-0.12531	0.0763141	0.665116	201	-0.119785	0.0263107	0.215462	344
C1orf122_127687	0.0235741	0.733521	0.999491	211	-0.00546463	0.91046	0.990242	426									0.0147854	0.879855	0.983616	107	0.0556119	0.442391	0.747293	193
C1orf123_54987	-0.0210297	0.761362	0.999491	211	0.0501227	0.302011	0.847511	426									0.0655121	0.502588	0.916906	107	-0.0256141	0.723647	0.894078	193
C1orf127_148345	-0.0699291	0.312025	0.999491	211	-0.0332029	0.494307	0.915269	426
C1orf131_128061	-0.0388696	0.574476	0.999491	211	-0.0248381	0.609193	0.941539	426									-0.0404255	0.679297	0.953169	107	-0.119776	0.0970841	0.396003	193
C1orf141_400757	-0.0695486	0.314672	0.999491	211	-0.0202939	0.676186	0.955029	426									0.11115	0.116213	0.702158	201	0.0568204	0.293316	0.632362	344
C1orf146_388649	0.0149945	0.828578	0.999491	211	-0.0182961	0.706509	0.960549	426									0.0155963	0.873319	0.982637	107	0.0427012	0.555432	0.815195	193
C1orf158_93190	0.0357438	0.605652	0.999491	211	-0.0332624	0.493532	0.915178	426									-0.021223	0.828225	0.976513	107	-0.0125352	0.862636	0.951574	193
C1orf159_54991	0.0716517	0.300225	0.999491	211	0.0381277	0.432501	0.891931	426	-0.102822	0.172011	0.614354	178	-0.111577	0.0613136	0.271003	282
C1orf162_128346	-0.0154755	0.823167	0.999491	211	-0.0191776	0.693068	0.957718	426									-0.0931562	0.339894	0.858514	107	0.110403	0.126395	0.444517	193
C1orf174_339448	-0.0569713	0.410332	0.999491	211	-0.0190828	0.694509	0.957852	426									0.0942099	0.334436	0.858398	107	0.0398127	0.58251	0.829559	193
C1orf185_284546	0.0437363	0.527494	0.999491	211	-0.0315177	0.516489	0.921952	426
C1orf186_440712									0.0278844	0.71099	0.91812	179	0.0429114	0.472921	0.731181	282
C1orf189_388701	0.0905982	0.189893	0.999491	211	-0.000871193	0.985696	0.999587	426
C1orf194_127003	-0.0131236	0.849695	0.999491	211	-0.0250293	0.606441	0.941539	426
C1orf198_84886	-0.139443	0.0430324	0.98243	211	0.0110209	0.820573	0.977494	426									-0.00948949	0.922719	0.989814	107	0.0183453	0.800094	0.925304	193
C1orf210_149466	0.0841439	0.223544	0.999491	211	-0.0174205	0.71995	0.962684	426
C1orf216_127703	0.027142	0.695065	0.999491	211	0.0340973	0.482744	0.911418	426
C1orf21_81563	0.0219456	0.751302	0.999491	211	0.00700927	0.885306	0.987224	426
[truncated: 17,819 more rows]

## Sheet: Avana_codependencies
Supplementary Table S3b: Avana telomere protein codependencies
Genome-wide codependencies with CST and shelterin members in the Avana panel
gene	CTC1_80169_pearson	CTC1_80169_P_value	CTC1_80169_Q_value	CTC1_80169_sample_size	STN1_79991_pearson	STN1_79991_P_value	STN1_79991_Q_value	STN1_79991_sample_size	TEN1_100134934_pearson	TEN1_100134934_P_value	TEN1_100134934_Q_value	TEN1_100134934_sample_size	ACD_65057_pearson	ACD_65057_P_value	ACD_65057_Q_value	ACD_65057_sample_size	POT1_25913_pearson	POT1_25913_P_value	POT1_25913_Q_value	POT1_25913_sample_size	TERF1_7013_pearson	TERF1_7013_P_value	TERF1_7013_Q_value	TERF1_7013_sample_size	TERF2_7014_pearson	TERF2_7014_P_value	TERF2_7014_Q_value	TERF2_7014_sample_size	TERF2IP_54386_pearson	TERF2IP_54386_P_value	TERF2IP_54386_Q_value	TERF2IP_54386_sample_size	TINF2_26277_pearson	TINF2_26277_P_value	TINF2_26277_Q_value	TINF2_26277_sample_size
A1BG_1	0.0239546	0.496529	0.805908	808	-0.0732669	0.0373232	0.238863	808	-0.038177	0.278405	0.602646	808	-0.0102373	0.773053	0.912537	796	0.104508	0.00315742	0.0566958	796	-0.0357876	0.313248	0.595783	796	-0.00788548	0.824212	0.92879	796	0.0770716	0.0296845	0.22025	796	-0.0165658	0.640731	0.822792	796
A1CF_29974	0.00428354	0.903237	0.974613	808	0.113441	0.00123778	0.0360913	808	0.046104	0.19047	0.504449	808	-0.0939304	0.0080063	0.102412	796	-0.0459701	0.195106	0.492706	796	-0.0759736	0.0320963	0.177401	796	-0.0662982	0.0615367	0.240337	796	-0.0406488	0.251996	0.589042	796	-0.121686	0.000580461	0.0133462	796
A2ML1_144568	0.0182435	0.604585	0.860544	808	0.0511071	0.146659	0.459876	808	0.0680791	0.0530616	0.262763	808	0.0630802	0.075291	0.320743	796	0.0349672	0.324478	0.62964	796	0.0546376	0.123501	0.370399	796	0.00857998	0.809017	0.920786	796	0.0474842	0.180784	0.507936	796	0.074187	0.0363788	0.172944	796
A2M_2	0.0604225	0.0860816	0.412801	808	0.0861636	0.0142858	0.147508	808	0.0390745	0.267253	0.593388	808	-0.00601648	0.865419	0.953866	796	0.0151681	0.669163	0.859852	796	-0.0195561	0.581681	0.801015	796	0.0209443	0.55516	0.773741	796	-0.0212799	0.548837	0.812604	796	-0.0174367	0.623276	0.812538	796
A3GALT2_127550	0.00910233	0.796143	0.937875	808	-0.00589678	0.867087	0.951806	808	0.0292122	0.406959	0.711913	808	0.0170488	0.631025	0.84328	796	0.0523266	0.140211	0.420548	796	0.0509584	0.150892	0.412099	796	0.0325365	0.359264	0.625518	796	0.0838882	0.0179216	0.170807	796	0.0678592	0.0556531	0.222579	796
A4GALT_53947	-0.0614055	0.0810867	0.404368	808	-0.0606206	0.0850555	0.359467	808	-0.0681067	0.052965	0.26255	808	0.0574589	0.105252	0.37509	796	-0.0652841	0.0656273	0.286653	796	-0.00372339	0.916467	0.965381	796	0.0427611	0.228166	0.494074	796	0.0741649	0.0364347	0.242252	796	0.000832654	0.981287	0.992634	796
A4GNT_51146	-0.00625967	0.85899	0.958915	808	-0.00937828	0.790105	0.92241	808	-0.00712295	0.839791	0.947188	808	-0.0092716	0.793955	0.922521	796	0.000931478	0.979067	0.993151	796	-0.0196007	0.58082	0.800637	796	0.0404309	0.254549	0.522779	796	0.0452532	0.202169	0.532897	796	0.0644836	0.0690123	0.252605	796
AAAS_8086	0.0510423	0.147172	0.514001	808	-0.026527	0.451447	0.751733	808	-0.0112725	0.749014	0.908039	808	0.00786357	0.824693	0.936874	796	-0.0138674	0.696055	0.872621	796	-0.0503183	0.156097	0.418546	796	-0.0136094	0.701437	0.863544	796	-0.00326463	0.926728	0.977937	796	0.00428656	0.90389	0.960058	796
AACS_65985	-0.0255402	0.468463	0.793022	808	0.000286264	0.993518	0.997846	808	-0.0502929	0.15321	0.452611	808	0.126979	0.000328858	0.017371	796	-0.0178929	0.614214	0.832243	796	0.0945942	0.00757097	0.0753272	796	0.0319172	0.368489	0.632044	796	0.0697618	0.0491224	0.277518	796	0.0227028	0.522432	0.745484	796
AADACL2_344752	-0.0434061	0.217761	0.594495	808	0.0243927	0.488685	0.77619	808	-0.000495882	0.988771	0.99747	808	-0.0397406	0.262756	0.580918	796	0.00622985	0.860694	0.950094	796	0.0411648	0.24602	0.525025	796	-0.0341495	0.335927	0.604522	796	0.0455571	0.199152	0.529426	796	0.035033	0.323568	0.588417	796
AADACL3_126767	0.106318	0.00247781	0.0797131	808	0.0433232	0.218641	0.552759	808	0.0127562	0.717313	0.893891	808	-0.0269571	0.447556	0.728919	796	0.0444632	0.210166	0.50988	796	-0.041724	0.239658	0.518229	796	0.0260323	0.463296	0.706922	796	-0.00141486	0.968208	0.991297	796	0.0165858	0.640329	0.822719	796
AADACL4_343066	0.0235704	0.503463	0.809003	808	-0.0839583	0.0169835	0.162207	808	-0.090957	0.00968595	0.100423	808	0.0142697	0.687694	0.871216	796	-0.00362694	0.918623	0.971096	796	0.07805	0.027668	0.162177	796	0.015924	0.653724	0.833451	796	0.00316299	0.929003	0.979018	796	0.0109793	0.757104	0.887788	796
AADAC_13	0.0521742	0.138398	0.501824	808	0.0106405	0.762652	0.91357	808	0.038871	0.269754	0.596244	808	-0.0261089	0.46198	0.739347	796	0.0666653	0.0601087	0.274015	796	-0.00910116	0.79766	0.915089	796	-0.000982255	0.977926	0.992526	796	0.00612609	0.862991	0.954384	796	0.0326449	0.357664	0.620943	796
AADAT_51166	0.035265	0.320372	0.688479	796	0.0220516	0.534435	0.803348	796	-0.022778	0.521055	0.792319	796	0.0675361	0.056831	0.277015	796	0.0975355	0.00588612	0.0800541	796	0.0734527	0.0382749	0.195949	796	0.0606029	0.087506	0.292498	796	-0.068126	0.054696	0.292667	796	0.068532	0.0532659	0.217541	796
AAED1_195827	0.0886418	0.011711	0.168832	808	0.0659093	0.0611196	0.304244	808	0.0475715	0.176725	0.486538	808	0.0508358	0.151879	0.448093	796	-0.0408238	0.249958	0.557189	796	0.0686484	0.0528615	0.233904	796	0.0253163	0.475689	0.716062	796	-0.0580855	0.101505	0.391005	796	0.0342943	0.333882	0.59939	796
AAGAB_79719	-0.00193094	0.956296	0.989374	808	0.0585473	0.0962968	0.382216	808	0.0726301	0.0390114	0.22164	808	0.00116575	0.973804	0.992093	796	-0.0869864	0.014089	0.127275	796	-0.00766444	0.829063	0.928539	796	0.0231945	0.513461	0.745125	796	-0.00910951	0.797478	0.9287	796	-0.0478441	0.177498	0.429375	796
AAK1_22848	-0.0345091	0.327231	0.69383	808	-0.0328488	0.351056	0.678653	808	0.0208635	0.553717	0.809244	808	0.0209693	0.554686	0.799735	796	-0.0315007	0.374773	0.670591	796	-0.0113868	0.748386	0.892551	796	-0.117573	0.000889041	0.0179773	796	-0.0294682	0.406384	0.721213	796	-0.0974903	0.00590919	0.057903	796
AAMDC_28971	0.0263872	0.453836	0.781875	808	-0.0089172	0.800201	0.927194	808	0.044908	0.202241	0.520003	808	0.021658	0.541757	0.792405	796	0.0818034	0.020988	0.157458	796	-0.035777	0.313392	0.595994	796	-0.129688	0.000243795	0.00768189	796	0.00380992	0.914533	0.973269	796	-0.0408481	0.249676	0.514461	796
AAMP_14	-0.0355291	0.313127	0.683516	808	0.00977839	0.781373	0.920176	808	0.0374088	0.288197	0.611495	808	0.0372837	0.293436	0.611563	796	0.0854069	0.0159419	0.135792	796	0.117959	0.000854718	0.0189777	796	0.129953	0.000236665	0.0075496	796	-0.0285732	0.420793	0.732668	796	0.0756194	0.0329093	0.163088	796
AANAT_15	0.0194066	0.581745	0.849389	808	-0.0716399	0.0417652	0.25376	808	-0.00407347	0.907961	0.972141	808	-0.00436982	0.902032	0.96773	796	-0.0862023	0.0149836	0.131631	796	-0.0349718	0.324415	0.607017	796	0.00521564	0.883194	0.954415	796	0.0161296	0.649551	0.860715	796	-0.0400235	0.25937	0.525352	796
AAR2_25980	0.12124	0.000552939	0.0372422	808	0.078865	0.0249752	0.195633	808	0.0565652	0.108124	0.379061	808	0.00324473	0.927174	0.976836	796	0.0833517	0.0186709	0.147655	796	-0.0146576	0.67967	0.858266	796	0.05883	0.0971911	0.310773	796	-0.0544255	0.124967	0.428542	796	0.13006	0.000233852	0.00729248	796
AARD_441376	0.033454	0.342247	0.70448	808	0.0155359	0.659246	0.868874	808	0.0448686	0.202637	0.52069	808	-0.025718	0.468713	0.743165	796	-0.0521089	0.141871	0.422753	796	0.0254692	0.473028	0.726882	796	-0.00926057	0.794194	0.913021	796	-0.00370195	0.916946	0.974484	796	0.0146917	0.678966	0.844767	796
AARS2_57505	-0.0193087	0.583653	0.850323	808	0.0938648	0.00758728	0.104062	808	0.0818921	0.0199058	0.151027	808	-0.118791	0.000784695	0.028488	796	-0.133064	0.00016652	0.0101583	796	-0.118937	0.000772992	0.0178636	796	-0.157821	7.6865e-06	0.000689426	796	-0.0718201	0.0427929	0.261957	796	-0.0667717	0.0597	0.231368	796
AARSD1_80755	-0.00737315	0.834243	0.950959	808	-0.0514205	0.144194	0.456391	808	-0.00524346	0.881698	0.96192	808	-0.0417473	0.239396	0.557336	796	0.0342752	0.334151	0.638784	796	-0.0772409	0.0293268	0.168411	796	-0.0901038	0.0109805	0.0885771	796	0.0511732	0.149176	0.468202	796	-0.0128472	0.717419	0.866831	796
AARS_16	-0.00280336	0.936585	0.984192	808	-0.0607853	0.0842101	0.357814	808	-0.115654	0.000989578	0.0255979	808	0.137447	0.000100147	0.0089802	796	-0.0474298	0.181285	0.475399	796	-0.00299496	0.932766	0.971925	796	0.10173	0.00406459	0.048055	796	-0.0202059	0.569193	0.823175	796	0.0175368	0.621281	0.811329	796
AASDHPPT_60496	0.0425167	0.227345	0.604845	808	0.060488	0.0857415	0.360281	808	0.151941	1.44111e-05	0.00115531	808	-0.0723287	0.0413394	0.23707	796	0.00635976	0.857819	0.948838	796	0.00171691	0.961426	0.984632	796	-0.0274272	0.439673	0.689349	796	0.0128626	0.717095	0.891816	796	0.0134178	0.705441	0.85924	796
AASDH_132949	-0.0347286	0.324161	0.691041	808	-0.048853	0.165338	0.485982	808	-0.0522308	0.13797	0.429202	808	-0.057806	0.103163	0.371378	796	-0.0932247	0.00849356	0.0976639	796	-0.0373745	0.29226	0.574563	796	-0.127253	0.000319126	0.00902015	796	0.00550078	0.876858	0.960286	796	-0.141904	5.87796e-05	0.00275899	796
AASS_10157	-0.0417933	0.238878	0.616787	796	-0.0543723	0.125336	0.430076	796	-0.0400072	0.259565	0.585469	796	-0.00628893	0.859386	0.950571	796	0.0459385	0.195413	0.492984	796	-0.114747	0.00118262	0.0235126	796	-0.0269933	0.446945	0.695026	796	-0.0814944	0.0214793	0.187568	796	0.0160412	0.651343	0.82855	796
AATF_26574	-0.104563	0.00292238	0.0865165	808	-0.0533006	0.130072	0.438282	808	-0.0201834	0.56672	0.815554	808	0.0538731	0.128848	0.414132	796	-0.0598534	0.0915012	0.338192	796	0.125762	0.000375475	0.0109259	796	-0.0386397	0.276218	0.546286	796	0.0697344	0.0492119	0.277677	796	-0.0743806	0.0358925	0.171589	796
AATK_9625	0.0466028	0.185713	0.561072	808	0.0130292	0.71153	0.892454	808	-0.0205253	0.560166	0.812369	808	-0.0252195	0.477378	0.747484	796	0.0294665	0.406411	0.696495	796	-0.0153346	0.66575	0.851175	796	-0.0500299	0.158486	0.407471	796	0.0068861	0.846193	0.949367	796	-0.0145958	0.680946	0.845418	796
ABAT_18	0.000658259	0.985206	0.996037	796	0.0356633	0.314934	0.64889	796	-0.0251547	0.478512	0.763567	796	0.0762673	0.0314354	0.207108	796	-0.0027879	0.937404	0.977749	796	-0.00445715	0.900085	0.956719	796	-0.00719348	0.839419	0.935351	796	-0.0703561	0.0472192	0.272137	796	0.0229932	0.517125	0.741415	796
ABCA10_10349	-0.027308	0.438232	0.770628	808	-0.00462868	0.895483	0.962637	808	0.0467669	0.184167	0.496022	808	-0.0552292	0.119483	0.399375	796	0.0181439	0.609252	0.829459	796	-0.0173376	0.625251	0.827064	796	-0.0374457	0.291341	0.561963	796	-0.0824528	0.0199873	0.181065	796	-0.0547296	0.122869	0.352228	796
ABCA12_26154	-0.0149466	0.671399	0.889801	808	-0.0121203	0.730845	0.900553	808	-0.00661545	0.851067	0.95128	808	0.0568973	0.108704	0.380904	796	-0.0324535	0.360491	0.658339	796	0.0855058	0.0158198	0.116291	796	0.0645569	0.0686966	0.255403	796	-0.0093388	0.792495	0.926867	796	0.0657404	0.0637599	0.240167	796
ABCA13_154664	-0.0467228	0.184582	0.560896	808	0.00792482	0.822041	0.935821	808	-0.00364736	0.917552	0.975199	808	-0.00515414	0.884562	0.96209	796	-0.0667805	0.0596665	0.272989	796	-0.0624695	0.078165	0.289196	796	-0.0725221	0.0407978	0.192343	796	0.0279344	0.431258	0.740129	796	-0.0257907	0.467457	0.706077	796
ABCA1_19	0.00637875	0.856337	0.958014	808	0.0283525	0.420911	0.730974	808	0.050671	0.15014	0.448279	808	0.030558	0.389242	0.68998	796	-0.0344222	0.332081	0.637264	796	-0.00533678	0.880501	0.948559	796	-0.0133281	0.707321	0.866632	796	-0.0126414	0.721757	0.893773	796	-0.00395123	0.911376	0.964067	796
ABCA2_20	0.00593611	0.866209	0.961127	808	-0.00111628	0.974726	0.991304	808	0.0157137	0.655594	0.862478	808	-0.0470756	0.18457	0.489139	796	0.0521891	0.141257	0.42184	796	-0.00317761	0.928676	0.970655	796	0.0593919	0.0940327	0.304338	796	-0.0163189	0.645716	0.859728	796	0.0556468	0.116709	0.342497	796
ABCA3_21	0.040413	0.251198	0.627823	808	-0.0621515	0.0774546	0.343531	808	-0.0444842	0.206537	0.525641	808	0.0112754	0.750767	0.902148	796	-0.00393519	0.911734	0.969129	796	0.0374625	0.291125	0.573915	796	0.0286732	0.419169	0.674483	796	0.0743218	0.0360397	0.241835	796	0.0224811	0.526503	0.748034	796
ABCA4_24	0.0565781	0.108043	0.451692	808	0.0387047	0.271811	0.607459	808	0.055576	0.114441	0.389745	808	-0.126436	0.000348967	0.0179619	796	-0.0890941	0.0119132	0.116483	796	-0.0117234	0.741212	0.88954	796	-0.135164	0.000130766	0.00518003	796	-0.0409449	0.248555	0.584695	796	-0.0406849	0.251575	0.516666	796
ABCA5_23461	0.0142667	0.68553	0.895634	808	-0.0166205	0.637108	0.860437	808	0.0151102	0.668017	0.868479	808	-0.0458725	0.196057	0.503121	796	-0.00899355	0.800001	0.923928	796	-0.00761329	0.830186	0.929107	796	-0.0118914	0.737638	0.883713	796	0.100551	0.00451649	0.091226	796	-0.0885532	0.0124411	0.0921174	796
ABCA6_23460	0.0472416	0.179749	0.556224	808	0.0530107	0.132177	0.441596	808	0.0200794	0.56872	0.816156	808	-0.0300502	0.397173	0.694651	796	-0.0317675	0.370739	0.666837	796	0.0398028	0.262009	0.54271	796	-0.00881256	0.803943	0.918054	796	0.00788358	0.824254	0.940393	796	-0.0115453	0.745005	0.88084	796
ABCA7_10347	-0.0579966	0.0994743	0.434702	808	-0.0322024	0.360619	0.685552	808	-0.0354622	0.314039	0.635427	808	0.0414504	0.242757	0.561315	796	0.00327985	0.926388	0.973602	796	-0.036104	0.308987	0.591465	796	0.0554974	0.117695	0.345856	796	-0.101263	0.00423838	0.088063	796	0.0263184	0.458393	0.701287	796
ABCA8_10351	-0.0862312	0.0142095	0.183407	808	-0.116899	0.000871038	0.0287983	808	-0.0279452	0.427616	0.727606	808	-0.068605	0.0530119	0.267168	796	-0.0136724	0.70012	0.874632	796	-0.0314355	0.375764	0.651661	796	-0.0695994	0.0496537	0.213576	796	-0.026922	0.448148	0.749311	796	-0.0251909	0.477878	0.714255	796
ABCA9_10350	0.0130816	0.710423	0.905228	808	0.0146637	0.677266	0.876968	808	-0.0237827	0.499625	0.777147	808	0.0505246	0.154405	0.451226	796	-0.050449	0.155023	0.441854	796	0.0150235	0.672132	0.854821	796	0.0621737	0.0795889	0.276697	796	0.0703131	0.0473546	0.272449	796	0.0617536	0.0816471	0.278322	796
ABCB10_23456	0.0411068	0.243146	0.621995	808	0.0163074	0.643466	0.863196	808	0.00184423	0.958256	0.988687	808	0.0718887	0.0425943	0.240463	796	0.111508	0.00162765	0.0379534	796	0.101998	0.0039677	0.0508752	796	0.0771949	0.0294236	0.158565	796	-0.0778926	0.0279844	0.214295	796	0.0967536	0.00629749	0.06021	796
ABCB11_8647	-0.072616	0.0390497	0.297074	808	-0.029662	0.399769	0.714513	808	-0.0604287	0.0860494	0.339735	808	-0.0806041	0.0229509	0.177779	796	-0.0476769	0.179019	0.473	796	-0.0259732	0.464311	0.720762	796	-0.0568128	0.109231	0.331386	796	-0.00124822	0.971951	0.992246	796	-0.0151226	0.670097	0.840369	796
ABCB1_5243	-0.0242097	0.491955	0.803895	808	-0.00719806	0.838124	0.942006	808	0.0316993	0.368176	0.682127	808	-0.0127651	0.719149	0.88686	796	-0.0174152	0.623703	0.837613	796	-0.0228549	0.519649	0.761054	796	-0.0170292	0.631417	0.820837	796	-0.00229199	0.948522	0.984663	796	-0.0535743	0.130986	0.364478	796
ABCB4_5244	0.0306156	0.384785	0.73633	808	0.0627071	0.0748366	0.338212	808	0.0854264	0.0151424	0.1288	808	-0.0165407	0.641238	0.848228	796	-0.0293356	0.4085	0.697897	796	-0.00795122	0.822771	0.925611	796	-0.0350277	0.323641	0.593014	796	0.00861235	0.80831	0.934405	796	0.0174277	0.623454	0.812538	796
ABCB5_340273	0.035137	0.3185	0.687015	808	0.0591786	0.0927548	0.375292	808	0.0513745	0.144554	0.438535	808	-0.0685435	0.0532256	0.26765	796	0.0516607	0.145335	0.427377	796	-0.00939768	0.791217	0.912106	796	0.036012	0.310222	0.580401	796	-0.0585665	0.0987007	0.386567	796	-0.0218213	0.538713	0.756993	796
ABCB6_10058	-0.0566534	0.107574	0.451061	808	-0.0905402	0.0100257	0.122237	808	-0.0907158	0.00988129	0.101225	808	0.104584	0.00313549	0.0616947	796	-0.0284811	0.422293	0.709555	796	0.20013	1.23216e-08	6.37836e-06	796	0.110816	0.00174065	0.027376	796	-0.0188247	0.595888	0.836664	796	0.0982978	0.00550848	0.0554455	796
ABCB7_22	-0.0671038	0.0570289	0.346836	805	0.00646381	0.854711	0.948514	805	-0.0235024	0.505489	0.781938	805	0.0340498	0.338257	0.64921	793	-0.0628491	0.0769265	0.31069	793	0.136104	0.000120756	0.00506448	793	0.100867	0.00446612	0.051057	793	0.0818269	0.0211947	0.186524	793	0.0437154	0.218815	0.479118	793
ABCB8_11194	-0.0181786	0.605871	0.861202	808	-0.0532649	0.13033	0.43892	808	-0.0901021	0.0103942	0.10422	808	0.0542542	0.12616	0.40976	796	0.00642072	0.856471	0.948099	796	-0.0195808	0.581204	0.800719	796	0.105551	0.00286732	0.0381081	796	0.036548	0.303071	0.638273	796	0.0190893	0.59073	0.792676	796
ABCB9_23457	0.0574638	0.102627	0.440802	808	0.0340095	0.334287	0.664698	808	0.0416673	0.236774	0.561208	808	-0.022314	0.529582	0.784613	796	0.0772411	0.0293263	0.188714	796	-0.016411	0.643855	0.838029	796	-0.0013922	0.968717	0.988697	796	0.00643798	0.85609	0.95239	796	-0.0279888	0.43036	0.681279	796
ABCC10_89845	0.0399471	0.256709	0.633113	808	0.0173445	0.622509	0.851409	808	0.0339068	0.33575	0.656364	808	0.0415414	0.241724	0.560188	796	-0.0365421	0.303149	0.610476	796	-0.047688	0.178918	0.446999	796	-0.0181245	0.609637	0.809279	796	-0.0142717	0.687652	0.878596	796	-0.0391235	0.270246	0.537112	796
ABCC11_85320	-0.0394092	0.263174	0.638502	808	-0.0243228	0.489933	0.777123	808	-0.027746	0.430919	0.730756	808	0.0661116	0.0622731	0.290411	796	0.0325949	0.358403	0.656377	796	0.00192424	0.956773	0.982834	796	0.086337	0.0148265	0.104973	796	0.0118923	0.737618	0.901378	796	0.055895	0.115085	0.339593	796
ABCC12_94160	-0.000907036	0.979462	0.994781	808	-0.0935855	0.00776951	0.105208	808	-0.0479988	0.172865	0.480512	808	-0.0118777	0.737929	0.896544	796	-0.0132567	0.708816	0.879058	796	0.0160949	0.650254	0.842544	796	0.056632	0.110365	0.333099	796	-0.0539825	0.128072	0.432831	796	0.0297642	0.401684	0.657368	796
ABCC1_4363	-0.0386756	0.272171	0.647026	808	0.00265681	0.939893	0.979098	808	-0.0570612	0.105062	0.373165	808	0.0288513	0.416284	0.708257	796	-0.0603242	0.0889747	0.333717	796	0.0175194	0.621629	0.824862	796	0.0108862	0.759098	0.895631	796	0.0684159	0.0536716	0.290109	796	-0.024695	0.48659	0.720264	796
ABCC2_1244	-0.0577202	0.1011	0.437481	808	0.0096192	0.784844	0.921326	808	-0.0336119	0.339973	0.658643	808	-0.0714215	0.0439619	0.24355	796	-0.0177809	0.616433	0.83341	796	0.0230062	0.516888	0.759006	796	0.0203475	0.566489	0.781099	796	-0.0279093	0.431672	0.740286	796	-0.142182	5.68285e-05	0.0026813	796
ABCC3_8714	0.032173	0.361058	0.719562	808	0.0219546	0.533169	0.803139	808	0.0025744	0.941754	0.983895	808	-0.00336432	0.924497	0.975611	796	0.0765939	0.030714	0.193221	796	-0.00509096	0.885967	0.951167	796	0.0467624	0.187511	0.445726	796	0.016911	0.633788	0.853308	796	0.0323156	0.362538	0.625086	796
ABCC4_10257	-0.0104324	0.76716	0.927307	808	-0.0235462	0.503901	0.785281	808	-0.0645382	0.0667147	0.297541	808	0.0291484	0.411499	0.704482	796	-0.0283034	0.425195	0.712051	796	0.00829485	0.815247	0.9224	796	0.0615799	0.0825106	0.282646	796	0.0274157	0.439865	0.744394	796	-0.0206889	0.559993	0.771544	796
ABCC5_10057	0.049309	0.161421	0.5334	808	0.0495475	0.159401	0.47831	808	-0.0181711	0.606021	0.834966	808	-0.0130158	0.713873	0.884458	796	-0.0216394	0.542104	0.791191	796	0.0362256	0.307359	0.590077	796	-0.0155465	0.661418	0.83786	796	-0.0270438	0.446096	0.747883	796	0.000364522	0.991807	0.996888	796
ABCC6_368	-0.055606	0.114246	0.463481	808	-0.0234706	0.505271	0.786304	808	-0.0358472	0.308812	0.630571	808	0.117343	0.000910176	0.0308235	796	-0.0350288	0.323626	0.629143	796	0.0345714	0.329988	0.61222	796	0.0661852	0.0619818	0.241219	796	0.0914782	0.00981506	0.128804	796	-0.0119799	0.735759	0.877046	796
ABCC8_6833	0.00250073	0.943418	0.985633	808	-0.020844	0.554089	0.81423	808	-0.0204825	0.560984	0.812722	808	-0.00806147	0.820355	0.934962	796	0.0234246	0.509291	0.768928	796	-0.0294501	0.406672	0.676281	796	-0.0263379	0.45806	0.703506	796	-0.047601	0.179713	0.50717	796	0.0499181	0.159419	0.403561	796
ABCC9_10060	0.0383341	0.27643	0.650268	808	0.00661155	0.851154	0.946609	808	0.0308222	0.381583	0.692529	808	0.0394553	0.2662	0.584466	796	-0.00410618	0.907916	0.967732	796	-0.0247918	0.484883	0.734602	796	-0.0716369	0.0433269	0.198504	796	-0.027781	0.433793	0.741457	796	-0.00555481	0.875658	0.948406	796
ABCD1_215	-0.00463944	0.895436	0.971714	805	-0.0756428	0.0318795	0.22198	805	-0.0605127	0.0861983	0.339908	805	-0.00341011	0.923617	0.975138	793	-0.0346823	0.329354	0.634593	793	-0.0269452	0.448617	0.708758	793	0.0166786	0.639095	0.825269	793	0.0278429	0.43364	0.741336	793	-0.0649377	0.0675934	0.249319	793
ABCD2_225	-0.0681081	0.05296	0.336795	808	-0.101838	0.00375751	0.0698858	808	-0.0952353	0.00674731	0.0814985	808	-0.0938667	0.00804924	0.102686	796	0.0158846	0.654526	0.852732	796	-0.0316019	0.373241	0.649587	796	-0.0288765	0.415876	0.672034	796	0.031341	0.3772	0.700331	796	0.00718332	0.839643	0.931404	796
ABCD3_5825	-0.0274103	0.436517	0.76949	808	-0.0204508	0.56159	0.818347	808	0.00404425	0.908618	0.972209	808	-0.0962854	0.00655597	0.0925807	796	-0.117471	0.000898333	0.0270365	796	-0.0409093	0.248967	0.528634	796	-0.062089	0.0800004	0.277353	796	0.0902184	0.0108788	0.135567	796	-0.110133	0.00185934	0.0274775	796
ABCD4_5826	0.0056988	0.87151	0.963511	808	0.0152256	0.665633	0.871958	808	0.0420908	0.232039	0.556169	808	-0.0185501	0.601262	0.826154	796	0.0702119	0.0476752	0.242226	796	-0.0885623	0.0124321	0.101244	796	0.0161188	0.649769	0.831363	796	-0.0268695	0.449033	0.750107	796	-0.00563739	0.873825	0.947284	796
ABCE1_6059	0.0520268	0.139517	0.503641	808	-0.00230868	0.947757	0.980939	808	0.0231466	0.511169	0.784805	808	0.00634617	0.85812	0.949692	796	0.0909431	0.010255	0.107773	796	-0.0511429	0.149417	0.4104	796	-0.114313	0.00123495	0.0223302	796	-0.0498637	0.159875	0.483171	796	-0.0487968	0.169013	0.417799	796
ABCF1_23	-0.0699905	0.0467162	0.320851	808	-0.0137376	0.696604	0.886311	808	-0.0233953	0.506639	0.782151	808	0.0297487	0.40193	0.697529	796	0.0306486	0.387837	0.68132	796	-0.00132892	0.970138	0.988743	796	-0.0662443	0.0617484	0.240697	796	-0.0678661	0.0556282	0.295217	796	-0.0717172	0.0430921	0.191781	796
ABCF2_10061	0.0470322	0.181688	0.558057	808	0.0480668	0.172257	0.49594	808	0.0128522	0.715277	0.892704	808	0.036154	0.308317	0.623934	796	0.056737	0.109705	0.369999	796	0.0828973	0.0193265	0.131392	796	0.0634122	0.0737653	0.264859	796	0.0632991	0.0742825	0.336631	796	0.0473888	0.181663	0.435655	796
ABCF3_55324	0.0515087	0.143506	0.509315	808	0.068757	0.0507334	0.278717	808	0.0562994	0.109794	0.382473	808	-0.0265515	0.454421	0.733146	796	0.0126839	0.720861	0.885759	796	-0.0214108	0.54638	0.777576	796	0.0179156	0.613765	0.811292	796	-0.0671594	0.0582301	0.301113	796	0.0831248	0.0189958	0.11913	796
ABCG1_9619	-0.016249	0.644656	0.878821	808	0.00239733	0.945754	0.980117	808	-0.0667527	0.0578746	0.275433	808	0.141221	6.38495e-05	0.00688587	796	0.0148184	0.676352	0.861823	796	0.0353632	0.319025	0.601231	796	0.212344	1.44226e-09	5.93882e-07	796	-0.0489223	0.167918	0.494003	796	0.172215	1.02015e-06	0.000130162	796
ABCG2_9429	0.0300211	0.394086	0.74247	808	0.051165	0.146201	0.458995	808	0.0397064	0.259589	0.585469	808	-0.0456645	0.198094	0.505854	796	-0.0479891	0.176186	0.469088	796	-9.85932e-05	0.997784	0.999399	796	-0.0262979	0.458744	0.703898	796	0.0321228	0.36541	0.690787	796	0.011071	0.755139	0.886631	796
ABCG4_64137	0.088829	0.0115343	0.167854	808	0.0501815	0.154124	0.470896	808	0.0090831	0.796565	0.928352	808	0.0208472	0.556995	0.800339	796	0.0642289	0.0701187	0.29634	796	-0.0368589	0.298974	0.58139	796	-0.0534219	0.132086	0.369408	796	0.0251526	0.478549	0.771041	796	-0.00714146	0.840565	0.93166	796
ABCG5_64240	-0.0133819	0.704084	0.90366	808	-0.0455597	0.195763	0.523257	808	-0.0129681	0.712822	0.891729	808	-0.0313825	0.376568	0.679497	796	-0.0117723	0.74017	0.896098	796	-0.0970783	0.00612361	0.0661979	796	0.00382332	0.914234	0.966065	796	-0.0492071	0.165454	0.49054	796	-0.00833936	0.814274	0.918389	796
ABCG8_64241	0.0801346	0.0227272	0.229399	808	0.0630093	0.0734432	0.335445	808	0.0516219	0.142627	0.435582	808	-0.0246413	0.487537	0.755168	796	0.0183416	0.605357	0.827326	796	-0.014405	0.684892	0.860647	796	0.0652906	0.0656003	0.249138	796	0.0376936	0.288156	0.624052	796	0.0416137	0.240905	0.505319	796
ABHD10_55347	0.000648237	0.985321	0.996042	808	-0.00870888	0.804773	0.9286	808	-0.00102542	0.976783	0.993523	808	-0.0763018	0.0313585	0.207053	796	0.021073	0.55273	0.799039	796	-0.00177724	0.960072	0.984135	796	-0.0311515	0.380093	0.641912	796	-0.0153628	0.665173	0.869257	796	-0.0450606	0.204098	0.461711	796
ABHD11_83451	-0.0509659	0.147779	0.514708	808	-0.0138405	0.694445	0.885557	808	0.0199865	0.570509	0.81707	808	0.0100617	0.776842	0.91477	796	0.0251229	0.479068	0.750713	796	0.0300031	0.397914	0.669584	796	-0.0187684	0.596988	0.801191	796	-0.0137497	0.698508	0.883773	796	-0.0218388	0.538387	0.756867	796
ABHD12B_145447	0.0220944	0.530565	0.821378	808	0.101191	0.00398535	0.0725095	808	0.065313	0.0635034	0.28991	808	0.0216517	0.541875	0.792405	796	0.0667974	0.0596015	0.272899	796	-0.0314676	0.375276	0.651206	796	-0.106971	0.00251153	0.0347889	796	0.0897905	0.0112627	0.138063	796	-0.0657361	0.0637771	0.240182	796
ABHD12_26090	0.0450498	0.200818	0.576767	808	0.0533206	0.129927	0.438178	808	-0.00949176	0.787626	0.924448	808	-0.00476384	0.893249	0.964073	796	0.020128	0.570683	0.808669	796	-0.0562376	0.112871	0.352957	796	-0.0127712	0.719019	0.872968	796	0.0287885	0.4173	0.729613	796	-0.011434	0.747379	0.881741	796
ABHD13_84945	0.0196649	0.576729	0.847752	808	-0.0153455	0.663162	0.870539	808	0.0189854	0.589969	0.826367	808	-0.0660957	0.0623363	0.290411	796	0.0669984	0.058837	0.271387	796	0.00873644	0.805603	0.918294	796	0.0190361	0.591765	0.797264	796	-0.0524032	0.139631	0.451795	796	-0.012996	0.71429	0.865235	796
ABHD14A_25864	0.0699009	0.0469988	0.321491	808	0.0373804	0.288565	0.623297	808	0.0756164	0.0316208	0.19722	808	-0.003829	0.914107	0.971993	796	-0.0113443	0.749295	0.900991	796	-0.0213981	0.546619	0.777724	796	-0.0378485	0.286178	0.556806	796	0.0143468	0.686097	0.878036	796	0.0311713	0.37979	0.638547	796
ABHD14B_84836	-0.0256091	0.467264	0.792555	808	0.0335258	0.341211	0.670654	808	0.0527754	0.133904	0.422589	808	-0.0459474	0.195327	0.502189	796	-0.067643	0.0564392	0.265188	796	-0.071665	0.0432444	0.209213	796	0.0138784	0.695826	0.859554	796	0.0242082	0.495224	0.781294	796	-0.0192694	0.587231	0.790103	796
ABHD15_116236	0.0517434	0.141689	0.507009	808	-0.00641511	0.855527	0.948676	808	0.0861063	0.0143508	0.124406	808	-0.0184378	0.603467	0.827176	796	-0.0187612	0.597129	0.823157	796	-0.000883063	0.980155	0.991815	796	-0.0246935	0.486617	0.724567	796	-0.0564287	0.111651	0.405863	796	0.00999672	0.778246	0.900744	796
ABHD16A_7920	-0.0470446	0.181572	0.558057	808	-0.0493577	0.161008	0.481139	808	-0.0310585	0.377942	0.689232	808	-0.0433162	0.222179	0.536583	796	-0.0358035	0.313033	0.619908	796	-0.0841118	0.0176173	0.124489	796	-0.0305419	0.389492	0.649764	796	-0.00683558	0.847308	0.949898	796	-0.0212258	0.549853	0.764561	796
ABHD16B_140701	-0.0216668	0.538551	0.826281	808	-0.0624726	0.0759325	0.340332	808	-0.0787113	0.0252599	0.173882	808	-0.0715817	0.0434889	0.242655	796	-0.0576404	0.104156	0.360339	796	-0.00335836	0.924631	0.968613	796	0.0393471	0.267515	0.537947	796	-0.0508627	0.151662	0.471621	796	-0.0253226	0.47558	0.712689	796
ABHD17A_81926	0.02178	0.536431	0.824768	808	-0.0743798	0.0345215	0.229696	808	-0.0336205	0.339849	0.658643	808	-0.0770463	0.0297383	0.201345	796	-0.0957989	0.00683463	0.0866548	796	-0.118566	0.000803078	0.0183863	796	-0.045117	0.203532	0.466547	796	0.00828907	0.815373	0.936246	796	-0.0490481	0.166826	0.414684	796
ABHD17B_51104	0.088559	0.0117899	0.169396	808	0.109435	0.00183779	0.0459271	808	0.0907431	0.00985901	0.10109	808	0.0224132	0.527753	0.78382	796	0.0866844	0.0144278	0.128553	796	0.0283784	0.423968	0.691525	796	0.0442281	0.212589	0.476871	796	-0.155129	1.1002e-05	0.00433336	796	0.0502454	0.156698	0.399616	796
ABHD17C_58489	0.0148999	0.672366	0.890361	808	0.0138017	0.695258	0.885678	808	-0.0595486	0.0907279	0.347352	808	0.0406925	0.251485	0.570329	796	-0.0428381	0.22733	0.530427	796	0.0226828	0.522799	0.76277	796	-0.00680411	0.848002	0.939088	796	0.0252232	0.477314	0.770607	796	0.0251053	0.479377	0.715374	796
ABHD18_80167	-0.098422	0.00510791	0.113402	808	-0.0408078	0.246593	0.582804	808	-0.00534351	0.879457	0.961244	808	-0.0315793	0.373582	0.67678	796	-0.0329144	0.353707	0.65339	796	-0.040897	0.249109	0.528869	796	0.0881871	0.0128101	0.0961472	796	-0.0209047	0.555908	0.817223	796	-0.0519333	0.14322	0.382089	796
ABHD1_84696	-0.000192813	0.995634	0.998473	808	-0.0120462	0.732426	0.901389	808	-0.0379681	0.281045	0.605038	808	0.101461	0.00416401	0.0715829	796	0.0432754	0.222616	0.526145	796	0.0841164	0.0176111	0.124489	796	0.112188	0.00152306	0.0254097	796	-0.0148454	0.675798	0.874298	796	0.0688853	0.0520466	0.214605	796
ABHD2_11057	-0.00351464	0.920542	0.978869	808	0.0165026	0.639501	0.861151	808	-0.0167132	0.635232	0.850828	808	-0.0286962	0.418795	0.710114	796	0.0656249	0.0642284	0.283758	796	-0.0475385	0.180286	0.449043	796	-0.00977606	0.783017	0.908021	796	-0.0539902	0.128017	0.432831	796	0.0931468	0.00854893	0.073477	796
ABHD3_171586	-0.0157896	0.654039	0.882062	808	0.0193534	0.582782	0.830519	808	0.00252729	0.942818	0.984319	808	-0.0471187	0.184168	0.488615	796	-0.0608041	0.0864578	0.328156	796	0.0684472	0.053562	0.235428	796	-0.00739672	0.834946	0.933135	796	0.0816448	0.0212388	0.186708	796	-0.0877698	0.0132425	0.0959995	796
ABHD4_63874	-0.0250355	0.477299	0.79888	808	-0.0158309	0.653193	0.867063	808	-0.00296775	0.932874	0.981241	808	-0.0744212	0.0357912	0.221342	796	-0.0244795	0.490402	0.757529	796	-0.0351704	0.321672	0.604069	796	-0.0458028	0.196737	0.457925	796	0.0378656	0.285961	0.621526	796	0.109114	0.00205033	0.0291057	796
ABHD5_51099	-0.0190378	0.588944	0.85266	808	-0.0190321	0.589055	0.833789	808	-0.065758	0.0617172	0.285326	808	0.0266812	0.45222	0.731677	796	0.0327367	0.356314	0.655201	796	-0.03264	0.357738	0.636251	796	0.0310103	0.382258	0.643597	796	0.0654927	0.0647679	0.315617	796	0.0137271	0.698979	0.855439	796
ABHD6_57406	0.0492602	0.161838	0.533996	808	-0.0057022	0.871434	0.953178	808	0.00865894	0.80587	0.932289	808	0.0124273	0.726278	0.890628	796	-0.0741852	0.0363835	0.211552	796	-0.0470419	0.184885	0.454819	796	0.0149114	0.674438	0.846634	796	0.0218562	0.538064	0.806343	796	0.0337365	0.341808	0.606425	796
ABHD8_79575	-0.0105104	0.765469	0.926907	808	0.0385624	0.273578	0.608938	808	0.0463889	0.187742	0.500885	808	-0.043453	0.220721	0.534701	796	-0.118693	0.000792617	0.0251941	796	-0.074469	0.0356723	0.188045	796	-0.0591563	0.0953472	0.307166	796	-0.0643459	0.0696086	0.326559	796	-0.0304129	0.391498	0.648725	796
ABI1_10006	0.0593239	0.0919545	0.42178	808	0.0900949	0.0104004	0.124693	808	0.0602684	0.0868869	0.341034	808	0.0457807	0.196954	0.504653	796	-0.00430267	0.90353	0.966076	796	0.00920808	0.795335	0.913678	796	0.0163099	0.645899	0.828803	796	0.0579596	0.102249	0.392324	796	0.0142395	0.68832	0.849656	796
ABI2_10152	-0.0285201	0.418169	0.757579	808	-0.00256082	0.942061	0.97964	808	-0.0387633	0.271085	0.596836	808	0.0796936	0.0245458	0.182393	796	0.0260178	0.463545	0.739565	796	0.0792159	0.0254202	0.154035	796	0.0370757	0.296139	0.56626	796	0.0474422	0.181171	0.508436	796	-0.0269068	0.448403	0.694373	796
ABI3BP_25890	0.00768829	0.827268	0.9491	808	0.0312724	0.374665	0.696295	808	-0.00158871	0.964036	0.990942	808	0.0295978	0.404322	0.699662	796	-0.0405553	0.253089	0.560114	796	-0.0153574	0.665284	0.850823	796	0.0380252	0.283934	0.554882	796	0.0333332	0.347613	0.67771	796	-0.0329076	0.353808	0.616967	796
ABI3_51225	0.0172351	0.624706	0.869177	808	0.00506011	0.885806	0.958868	808	0.0409467	0.244988	0.570527	808	-0.0424199	0.231903	0.549247	796	0.0153561	0.665309	0.858246	796	-0.015268	0.667114	0.852081	796	0.0651749	0.0660809	0.249844	796	-0.0890729	0.0119335	0.140642	796	-0.0146372	0.680091	0.845262	796
ABL1_25	0.040767	0.247067	0.624096	808	0.0723855	0.0396769	0.247203	808	-0.00433909	0.901988	0.96998	808	0.00985563	0.781295	0.916787	796	-0.0745552	0.0354585	0.208582	796	-0.0458639	0.19614	0.468667	796	0.0625361	0.0778473	0.273871	796	0.0444748	0.210046	0.542498	796	0.0666455	0.0601849	0.232479	796
ABL2_27	-0.0194272	0.581344	0.849389	808	0.00968428	0.783424	0.920862	808	-0.021682	0.538267	0.801473	808	-0.0502861	0.156362	0.453493	796	-0.0440193	0.214758	0.516115	796	-0.0558148	0.115608	0.357864	796	-0.052316	0.140292	0.381652	796	-0.0640309	0.0709891	0.329537	796	-0.0515049	0.146554	0.386314	796
ABLIM1_3983	0.0658626	0.0613035	0.358752	808	0.0549545	0.118556	0.41925	808	0.0350741	0.319369	0.640485	808	-0.00214918	0.951725	0.984218	796	0.0128425	0.717518	0.884233	796	-0.0198246	0.576506	0.797522	796	-0.000370038	0.991683	0.996247	796	-0.0501807	0.157234	0.480023	796	-0.0491674	0.165795	0.413359	796
ABLIM2_84448	-9.42476e-05	0.997866	0.999203	808	-0.000654916	0.98517	0.9949	808	0.00353063	0.920182	0.97599	808	0.0205195	0.563212	0.804372	796	-0.0177341	0.617362	0.833826	796	-0.0458139	0.196629	0.46937	796	0.0368898	0.298568	0.569305	796	0.0262802	0.459047	0.757262	796	-0.0117861	0.739877	0.878457	796
ABLIM3_22885	-0.0690658	0.0497017	0.327991	808	0.0051422	0.883966	0.958712	808	0.00599368	0.864924	0.956709	808	-0.0604568	0.0882735	0.343699	796	-0.018597	0.600343	0.824901	796	-0.0635823	0.0729934	0.278831	796	-0.0416994	0.239936	0.507313	796	0.0817885	0.0210115	0.185669	796	-0.0234858	0.508186	0.73479	796
ABRACL_58527	-0.0591586	0.0928655	0.423051	808	0.0255527	0.468244	0.762194	808	0.0289884	0.410563	0.715146	808	-0.0776608	0.0284556	0.19697	796	0.0672939	0.0577275	0.268802	796	-0.0634733	0.0734873	0.279568	796	-0.0598117	0.0917276	0.300751	796	-0.0765243	0.0308665	0.224414	796	0.0210191	0.553747	0.767163	796
ABRAXAS1_84142	-0.0556072	0.11697	0.467537	796	0.0149355	0.673942	0.875491	796	0.0537756	0.129542	0.416183	796	-0.0912273	0.0100192	0.115623	796	-0.0305288	0.389696	0.682689	796	-0.0103486	0.770654	0.902451	796	0.0144616	0.68372	0.852733	796	-0.046662	0.188462	0.517575	796	-0.0925319	0.0089975	0.0756809	796
ABRAXAS2_23172	0.0354696	0.313939	0.683952	808	0.064586	0.0665128	0.317963	808	0.01062	0.763095	0.913092	808	-0.0201111	0.571006	0.80976	796	-0.030038	0.397365	0.689399	796	-0.0477598	0.178264	0.445856	796	-0.0308845	0.384192	0.645116	796	-0.000423053	0.990492	0.997794	796	-0.0204243	0.565024	0.7753	796
ABRA_137735	0.0338967	0.335893	0.698592	808	0.0470968	0.181088	0.507809	808	0.023982	0.496037	0.775229	808	-0.0661443	0.0621433	0.290259	796	0.00799736	0.82176	0.932457	796	0.0169203	0.633601	0.832226	796	-0.0258479	0.466471	0.709019	796	-0.0960274	0.00670246	0.108984	796	0.0175229	0.621558	0.811538	796
ABR_29	0.0645014	0.0668702	0.373056	808	0.0375531	0.28634	0.620978	808	0.00449798	0.898419	0.968864	808	0.0494695	0.163207	0.463332	796	0.0641021	0.0706748	0.297212	796	-0.0760811	0.031853	0.176866	796	0.0250823	0.479779	0.719345	796	-0.0408636	0.249496	0.585919	796	0.00838321	0.813315	0.918184	796
ABT1_29777	-0.0950311	0.00729614	0.133711	796	-0.130587	0.000220444	0.011994	796	-0.11662	0.000979514	0.0254617	796	0.0546266	0.123576	0.405829	796	-0.0252985	0.476	0.748493	796	0.0614156	0.0833343	0.299246	796	0.00215502	0.951594	0.980437	796	0.0118578	0.738353	0.901812	796	-0.0177508	0.617029	0.80834	796
ABTB1_80325	-0.00243242	0.944961	0.986613	808	-0.0278657	0.428932	0.736695	808	0.0091296	0.795546	0.927967	808	-0.0558358	0.11547	0.391851	796	-0.132881	0.000170037	0.0103035	796	-0.100131	0.00468825	0.0564772	796	-0.0410109	0.247792	0.515319	796	-0.051367	0.147639	0.465205	796	-0.0526444	0.137815	0.374237	796
ABTB2_25841	0.0336834	0.338945	0.701628	808	0.0175461	0.618469	0.849228	808	-0.00943078	0.788958	0.925135	808	-0.0496686	0.161518	0.460786	796	-0.0305068	0.390038	0.682971	796	-0.0725289	0.040779	0.202935	796	-0.092263	0.00920014	0.0796294	796	0.0188917	0.59458	0.836577	796	-0.0265423	0.454577	0.698573	796
ACAA1_30	-0.0526772	0.134631	0.496486	808	-0.0693425	0.048792	0.274186	808	-0.0723722	0.0397135	0.224013	808	0.0790329	0.0257623	0.187404	796	0.0193718	0.585246	0.816964	796	-0.0176332	0.619364	0.823063	796	0.00801419	0.821391	0.927095	796	-0.0341576	0.335813	0.667486	796	0.0492973	0.164678	0.411893	796
ACAA2_10449	0.0336771	0.339036	0.701628	808	-0.00587457	0.867583	0.951806	808	-0.0503555	0.152699	0.451837	808	-0.0983628	0.00547734	0.0840204	796	-0.0630529	0.0754178	0.307752	796	-0.0880069	0.0129952	0.10329	796	-0.0613411	0.0837097	0.285192	796	0.0442362	0.212505	0.544579	796	0.0213376	0.547753	0.762885	796
ACACA_31	-0.045124	0.200077	0.576405	808	-0.0550069	0.118205	0.418941	808	0.054361	0.122593	0.40484	808	-0.017167	0.62866	0.84269	796	-0.0488818	0.16827	0.459949	796	0.0417501	0.239365	0.518023	796	-0.0177508	0.61703	0.812688	796	0.0118657	0.738185	0.901667	796	-0.0148839	0.675004	0.843197	796
ACACB_32	0.0815397	0.0204457	0.218032	808	-0.0272672	0.438916	0.743708	808	-0.0558067	0.112943	0.38741	808	-0.010258	0.772608	0.912537	796	-0.0104109	0.769313	0.910517	796	-0.049026	0.167017	0.432419	796	0.0688317	0.0522302	0.219459	796	0.0288654	0.416057	0.728525	796	-0.0648199	0.067573	0.249319	796
ACAD10_80724	0.0424295	0.228301	0.605527	808	0.0322615	0.359738	0.685356	808	0.0674554	0.0552814	0.268522	808	-0.0658903	0.0631559	0.292898	796	-0.00674511	0.849304	0.945597	796	-0.0379968	0.284294	0.567135	796	0.0444209	0.2106	0.474466	796	-0.0197753	0.577453	0.826469	796	-0.00976004	0.783363	0.903034	796
ACAD11_84129	-0.0121704	0.729775	0.913253	808	-0.0374679	0.287436	0.622343	808	-0.00810463	0.818073	0.937795	808	-0.11968	0.000715779	0.0273021	796	-0.066201	0.0619194	0.278514	796	-0.117285	0.000915535	0.0198187	796	-0.101532	0.00413767	0.0486478	796	-0.113353	0.00135824	0.0499338	796	-0.0999316	0.00477172	0.0507425	796
ACAD8_27034	0.0210913	0.549397	0.832505	808	-0.0339537	0.335082	0.665755	808	-0.0793071	0.0241715	0.169088	808	0.110204	0.00184665	0.0450304	796	-0.00949398	0.789128	0.919434	796	0.0836952	0.0181881	0.126792	796	0.0701902	0.047744	0.209249	796	0.120388	0.000665013	0.0356471	796	0.0373278	0.292865	0.561174	796
ACAD9_28976	-0.101305	0.00394414	0.0980246	808	-0.027571	0.433832	0.740089	808	-0.05351	0.128568	0.414491	808	-0.0678922	0.055534	0.274875	796	-0.0744565	0.0357031	0.209343	796	-0.0545225	0.124295	0.371796	796	-0.095871	0.00679266	0.066274	796	-0.0946705	0.0075223	0.115206	796	-0.0307572	0.386156	0.643995	796
ACADL_33	-0.107482	0.00221828	0.0759749	808	-0.101189	0.00398606	0.0725095	808	-0.028164	0.424006	0.724525	808	-0.0204039	0.565414	0.805802	796	0.0022461	0.949551	0.982448	796	0.0407522	0.25079	0.531016	796	-0.0455337	0.199383	0.461711	796	-0.0473693	0.181843	0.509453	796	-0.0160566	0.651031	0.828364	796
ACADM_34	-0.0483469	0.169767	0.543169	808	-0.0539487	0.12546	0.430078	808	-0.0899246	0.010547	0.105052	808	-0.0638542	0.071773	0.313503	796	-0.0576902	0.103857	0.360061	796	0.00311702	0.930033	0.970981	796	-0.110115	0.00186258	0.0286681	796	0.0815534	0.0213847	0.187254	796	-0.0144817	0.683304	0.846734	796
ACADSB_36	0.0636495	0.070561	0.382681	808	0.0730635	0.0378555	0.240824	808	-0.00770291	0.826944	0.941607	808	-0.0322944	0.362853	0.667801	796	0.0469457	0.185786	0.481416	796	-0.0185889	0.600501	0.812247	796	0.00318892	0.928423	0.971472	796	-0.0441886	0.212998	0.54462	796	-0.0390445	0.271215	0.538119	796
ACADS_35	-0.0279327	0.427823	0.76411	808	0.029691	0.39931	0.713903	808	-0.0200049	0.570155	0.81695	808	-0.0374585	0.291177	0.609604	796	-0.00407471	0.908618	0.967785	796	-0.0659063	0.0630917	0.256472	796	-0.022836	0.519994	0.749921	796	0.0272588	0.442488	0.745953	796	-0.0215678	0.543442	0.760015	796
ACADVL_37	0.0325708	0.355149	0.714796	808	-0.0151948	0.66627	0.872322	808	-0.0125394	0.721915	0.896358	808	0.00442695	0.900758	0.967214	796	-0.0247322	0.485933	0.754943	796	0.0335348	0.344704	0.624252	796	0.0177465	0.617114	0.812712	796	-0.00860121	0.808553	0.934405	796	-0.00929373	0.793474	0.907472	796
ACAN_176	0.0362098	0.30394	0.675436	808	0.00255572	0.942176	0.979677	808	-0.0169194	0.631065	0.848822	808	-0.0561763	0.113265	0.388909	796	0.0250264	0.480759	0.75148	796	-0.062543	0.0778149	0.288679	796	0.0525584	0.13846	0.378603	796	-0.023351	0.510624	0.790273	796	0.0798859	0.0242012	0.136725	796
ACAP1_9744	0.0772864	0.0280363	0.253383	808	-0.0412271	0.241768	0.577884	808	0.0741124	0.0351778	0.209718	808	-0.0436422	0.218716	0.532048	796	0.00240311	0.946029	0.980446	796	-0.117618	0.000885012	0.0194359	796	-0.0205263	0.563082	0.778737	796	-0.053152	0.134054	0.443371	796	-0.0593146	0.0944627	0.303992	796
ACAP2_23527	0.153813	1.12526e-05	0.00536511	808	0.055563	0.114526	0.414169	808	0.0756715	0.0314965	0.196964	808	0.0332093	0.349409	0.658476	796	-0.0206692	0.560368	0.802765	796	-0.00489254	0.890383	0.952763	796	0.0982988	0.005508	0.0580572	796	-0.00900808	0.799685	0.930215	796	0.00644961	0.855832	0.938929	796
ACAP3_116983	0.151619	1.50344e-05	0.00605317	808	0.0379798	0.280897	0.615391	808	0.0403303	0.252171	0.578406	808	-0.0569427	0.108421	0.380398	796	0.120367	0.000666501	0.0232101	796	-0.0448607	0.206114	0.480306	796	0.00141356	0.968238	0.988646	796	-0.0992897	0.00504986	0.0956043	796	0.0689833	0.0517126	0.213813	796
ACAT1_38	-0.0290694	0.409256	0.751181	808	-0.0292663	0.406089	0.720055	808	-0.0265692	0.450728	0.744257	808	-0.0469443	0.185799	0.490858	796	0.0106452	0.764272	0.907654	796	-0.0415333	0.241815	0.521137	796	0.00509869	0.885795	0.955247	796	-0.031577	0.373616	0.69798	796	-0.0566382	0.110326	0.331744	796
ACAT2_39	0.00686109	0.845605	0.954465	808	-0.0261561	0.457801	0.755344	808	-0.0358704	0.308499	0.630144	808	-0.0653722	0.0652632	0.297468	796	0.0212925	0.5486	0.796529	796	0.0133432	0.707004	0.872879	796	0.000897039	0.979841	0.99267	796	-0.0419132	0.237532	0.572364	796	0.0188189	0.596001	0.796	796
ACBD3_64746	0.0116564	0.740769	0.918333	808	-0.0987562	0.00495869	0.0830464	808	-0.0699107	0.0469677	0.246441	808	-0.0424599	0.231464	0.548908	796	0.055421	0.118202	0.38428	796	0.0660568	0.0624908	0.254944	796	0.0568046	0.109282	0.331431	796	-0.0794683	0.0249549	0.20042	796	0.07661	0.0306788	0.156618	796
ACBD4_79777	-0.0165105	0.639341	0.876639	808	0.0273278	0.437901	0.742545	808	0.0524833	0.136074	0.426169	808	-0.013142	0.711223	0.883628	796	-0.0630454	0.0754525	0.307824	796	-0.146886	3.17905e-05	0.00208507	796	-0.0504031	0.1554	0.402968	796	0.0739996	0.036855	0.243039	796	-0.105677	0.00283397	0.0359313	796
ACBD5_91452	0.0218765	0.534626	0.82353	808	0.00837058	0.812213	0.931829	808	-0.0202592	0.565262	0.814881	808	-0.0499432	0.159209	0.458581	796	0.0473718	0.18182	0.475768	796	0.032335	0.362249	0.639879	796	-0.0378758	0.285831	0.556592	796	0.0326046	0.358259	0.685783	796	-0.00861529	0.808246	0.91581	796
ACBD6_84320	0.0457996	0.193417	0.570275	808	-0.0432307	0.219628	0.55378	808	-0.0222671	0.527356	0.795557	808	-0.0155426	0.661497	0.858339	796	0.0120805	0.733623	0.891707	796	-0.0164172	0.643731	0.837988	796	-0.069974	0.0484355	0.210647	796	-0.0561353	0.113529	0.4093	796	0.0246318	0.487706	0.721151	796
ACBD7_414149	0.010556	0.764482	0.926245	808	0.014123	0.688531	0.882859	808	-0.0116558	0.740782	0.904478	808	0.0314615	0.375368	0.678121	796	-0.0678536	0.0556736	0.26378	796	-0.0127858	0.718713	0.878712	796	0.0676656	0.0563564	0.229093	796	0.00180117	0.959535	0.988163	796	0.0161692	0.648748	0.82704	796
ACCSL_390110	0.0123944	0.725001	0.911171	808	-0.0141271	0.688445	0.882859	808	0.0293329	0.405022	0.710446	808	0.00485271	0.89127	0.963766	796	0.019369	0.585301	0.816964	796	-0.0146547	0.679729	0.858266	796	-0.00905682	0.798624	0.915442	796	0.0150204	0.672196	0.872493	796	-0.00416667	0.906565	0.961266	796
ACCS_84680	-0.0116971	0.739897	0.918034	808	-0.0247013	0.483201	0.772421	808	-0.00802108	0.819916	0.938531	808	0.0742873	0.0361261	0.222039	796	0.0588171	0.0972646	0.347994	796	-0.0380308	0.283863	0.566913	796	-0.00893237	0.801333	0.916643	796	0.0781097	0.0275489	0.212657	796	-0.0385528	0.2773	0.545034	796
ACD_65057	0.1327	0.000173578	0.0191761	796	0.175956	5.86674e-07	0.000217758	796	0.106906	0.00252695	0.0448856	796					0.164182	3.21631e-06	0.000971217	796	0.416213	1.07435e-34	1.94652e-30	796	0.280679	7.07343e-16	1.16506e-12	796	0.0493185	0.164497	0.489236	796	0.254594	3.04946e-13	3.62437e-10	796
ACE2_59272	0.0528095	0.134379	0.495769	805	-0.0150089	0.670689	0.874151	805	0.0300045	0.39523	0.703415	805	-0.00669584	0.850672	0.947157	793	0.0874624	0.0137472	0.125985	793	-0.0434609	0.221512	0.498678	793	0.0205024	0.564276	0.779479	793	-0.0639958	0.0716804	0.331387	793	0.0515082	0.147294	0.387542	793
ACER1_125981	-0.0156574	0.65675	0.883436	808	0.00836372	0.812364	0.931829	808	-0.0366576	0.297996	0.620184	808	-0.0323302	0.36232	0.667423	796	0.00673679	0.849488	0.94567	796	-0.0137148	0.699235	0.868349	796	0.0464781	0.190211	0.449227	796	-0.0706683	0.0462443	0.269406	796	0.0758416	0.0323973	0.161369	796
ACER2_340485	0.0470244	0.18176	0.558057	808	0.0133436	0.704891	0.889759	808	-0.01717	0.626016	0.84587	808	0.102054	0.00394783	0.0697823	796	0.013274	0.708453	0.878886	796	0.10336	0.00350716	0.0472085	796	0.0736497	0.0377581	0.183652	796	0.0956244	0.00693719	0.11113	796	0.0883175	0.0126776	0.0931326	796
ACER3_55331	-0.039294	0.264573	0.639735	808	-0.00704653	0.841486	0.943457	808	-0.00844107	0.810661	0.933967	808	0.0178237	0.615584	0.835254	796	-0.0428571	0.227124	0.530224	796	0.00165648	0.962783	0.985092	796	-0.00032528	0.992689	0.996816	796	-0.0332683	0.348554	0.677979	796	-0.0189168	0.594091	0.795164	796
ACE_1636	-0.0385615	0.27359	0.648469	808	-0.0490076	0.164002	0.484808	808	0.0344692	0.327792	0.648833	808	-0.114132	0.00125731	0.0367625	796	-0.0296633	0.403282	0.694352	796	-0.0442926	0.211923	0.486581	796	-0.0126631	0.721299	0.874439	796	-4.5773e-05	0.998971	0.99961	796	-0.0718553	0.0426909	0.190323	796
ACHE_43	0.0027709	0.937317	0.984192	808	-0.0163521	0.642558	0.862944	808	0.016107	0.647551	0.857751	808	0.00722459	0.838734	0.941256	796	0.00563118	0.873963	0.956061	796	-0.0100342	0.777436	0.906206	796	-0.0618014	0.0814107	0.280058	796	-0.0534163	0.132127	0.439338	796	-0.000607238	0.986353	0.995343	796
ACIN1_22985	-0.0436171	0.21553	0.592112	808	-0.0850246	0.015628	0.155405	808	-0.081785	0.0200685	0.151501	808	-0.0430766	0.22475	0.539999	796	0.0352374	0.320751	0.62716	796	-0.0967679	0.00628969	0.0674011	796	-0.0738817	0.0371571	0.182015	796	0.0212995	0.548469	0.812258	796	0.120356	0.000667254	0.0146097	796
ACKR1_2532	-0.018575	0.598034	0.856704	808	-0.112923	0.0013036	0.0372964	808	-0.0798167	0.0232729	0.165551	808	-0.0697794	0.0490653	0.257373	796	-0.0386684	0.275861	0.582727	796	-0.106275	0.00268043	0.0395761	796	-0.0459747	0.195061	0.455427	796	-0.102753	0.00370629	0.0823933	796	-0.0272549	0.442553	0.689154	796
ACKR2_1238	-0.0182149	0.605152	0.860811	808	0.0480414	0.172483	0.495962	808	0.00904644	0.797368	0.92881	808	-0.0279759	0.430573	0.717234	796	0.0306766	0.387402	0.681205	796	0.0406973	0.25143	0.531429	796	0.115671	0.00107803	0.0204736	796	-0.0539145	0.128554	0.433541	796	0.0102728	0.772287	0.897046	796
ACKR3_57007	0.0883347	0.012006	0.170709	808	-0.00201986	0.954285	0.983873	808	-0.026185	0.457305	0.748541	808	0.0926976	0.00887459	0.108208	796	0.0121188	0.732811	0.891318	796	0.0191063	0.5904	0.805844	796	0.0787641	0.0262719	0.149355	796	-0.0150096	0.672419	0.872512	796	0.0494747	0.163163	0.4095	796
ACKR4_51554	0.00689531	0.844845	0.954394	808	0.00663821	0.85056	0.946609	808	0.0165313	0.638918	0.852864	808	-0.0247167	0.486206	0.7548	796	-0.105872	0.00278318	0.0527465	796	-0.0307298	0.38658	0.659962	796	-0.0750985	0.0341369	0.173734	796	0.116813	0.000960598	0.042133	796	-0.0949808	0.0073273	0.0663117	796
ACLY_47	-0.0457793	0.193615	0.570575	808	0.0306854	0.3837	0.702192	808	0.0612459	0.081881	0.331947	808	-0.0602419	0.0894126	0.346223	796	0.0213968	0.546642	0.795124	796	0.0111657	0.753113	0.894751	796	0.0047674	0.89317	0.958179	796	-0.0364056	0.30496	0.640199	796	0.0894602	0.0115672	0.0878693	796
ACMSD_130013	-0.0270887	0.441921	0.772686	808	-0.00424597	0.904082	0.965488	808	0.00631484	0.857761	0.95384	808	-0.0415999	0.24106	0.559294	796	-0.00667386	0.850878	0.946011	796	-0.00688472	0.846224	0.935213	796	-0.0292161	0.410412	0.66752	796	-0.0768679	0.0301199	0.221924	796	0.0690428	0.0515107	0.213221	796
ACO1_48	-0.0369837	0.293715	0.667128	808	0.00480066	0.891624	0.961052	808	0.0212359	0.546662	0.80491	808	-0.0182569	0.607025	0.828918	796	-0.0154386	0.663623	0.857231	796	0.000283675	0.993624	0.99771	796	0.017554	0.620939	0.815112	796	0.055809	0.115645	0.413267	796	-0.0416243	0.240785	0.505319	796
ACO2_50	-0.0290074	0.410256	0.752178	808	-0.00181519	0.958913	0.985758	808	-0.00681188	0.846699	0.949621	808	-0.03552	0.316883	0.631538	796	-0.0671023	0.0584446	0.270334	796	-0.017451	0.62299	0.825443	796	-0.0236066	0.506006	0.739281	796	-0.0327637	0.355917	0.683435	796	-0.0631031	0.0751849	0.265389	796
ACOD1_730249	0.0227204	0.51898	0.816775	808	0.0179123	0.611162	0.845112	808	0.0260632	0.459401	0.749739	808	-0.0418319	0.238444	0.556001	796	0.0366363	0.301904	0.609641	796	-0.00595408	0.866801	0.943443	796	0.0385778	0.276989	0.547216	796	0.0379588	0.284776	0.620257	796	0.0324534	0.360493	0.623681	796
ACOT11_26027	0.0205919	0.558892	0.83769	808	0.0354087	0.314771	0.64889	808	0.0190139	0.589412	0.826228	808	0.0262215	0.46005	0.738019	796	0.0198933	0.575185	0.811556	796	-0.00751968	0.832243	0.930134	796	-0.00951564	0.788658	0.910258	796	-0.0162456	0.647201	0.860305	796	0.0478913	0.17707	0.42884	796
ACOT12_134526	-0.00208998	0.9527	0.988548	808	-0.108295	0.00205177	0.0492946	808	-0.0944884	0.00719411	0.0847239	808	-0.0431198	0.224285	0.539314	796	-0.0137504	0.698493	0.873853	796	-0.0205536	0.562564	0.788224	796	-0.0663426	0.0613623	0.239872	796	-0.0177049	0.61794	0.846536	796	0.0112696	0.750891	0.883877	796
ACOT13_55856	-0.0343484	0.329491	0.695041	808	0.0387691	0.271013	0.60667	808	0.0179392	0.610626	0.83794	808	0.00126001	0.971686	0.991273	796	0.0187845	0.596673	0.823119	796	0.0441407	0.213496	0.488312	796	-0.0289305	0.415004	0.671122	796	0.00522322	0.883026	0.962361	796	-0.0249073	0.48285	0.717337	796
ACOT1_641371	-0.0396408	0.260376	0.636038	808	-0.0761918	0.0303438	0.216652	808	-0.0208456	0.554058	0.809419	808	-0.0506104	0.153705	0.45048	796	0.0090708	0.79832	0.923592	796	-0.051152	0.149344	0.410384	796	0.00229498	0.948454	0.97969	796	0.0186556	0.599195	0.838447	796	0.0440067	0.214889	0.475521	796
ACOT2_10965	0.0269338	0.444536	0.774747	808	-0.0068957	0.844836	0.945079	808	-0.0141679	0.687593	0.878747	808	-0.0311244	0.380509	0.682946	796	0.00548349	0.877242	0.957289	796	0.0118355	0.738826	0.888671	796	-0.017967	0.612748	0.810805	796	-0.0159899	0.652386	0.862468	796	-0.0292225	0.41031	0.664996	796
ACOT4_122970	-0.0281239	0.424666	0.761867	808	-0.0561824	0.110535	0.408043	808	-0.0417475	0.235872	0.56047	808	-0.0865755	0.0145517	0.140989	796	-0.0121061	0.733079	0.891405	796	-0.122396	0.000538527	0.0138594	796	-0.0625025	0.0780079	0.274019	796	0.0100375	0.777365	0.919588	796	-0.0699816	0.0484112	0.205317	796
ACOT6_641372	0.00143701	0.967468	0.992336	808	-0.00277044	0.937328	0.978192	808	0.0146896	0.676728	0.871987	808	-0.0689361	0.0518732	0.264325	796	0.0409214	0.248827	0.555846	796	-0.0749343	0.0345318	0.185048	796	-0.0908626	0.0103227	0.0851278	796	0.0150197	0.672211	0.872493	796	-0.0416269	0.240754	0.505319	796
ACOT7_11332	0.0349969	0.320436	0.688479	808	-0.0290599	0.40941	0.722408	808	0.00309166	0.930079	0.980219	808	-0.0512928	0.148226	0.442649	796	-0.0291231	0.411904	0.701003	796	-0.0254492	0.473375	0.726882	796	-0.00273986	0.938481	0.976115	796	-0.0263035	0.458647	0.757085	796	0.0342843	0.334022	0.599427	796
ACOT8_10005	0.0485294	0.168159	0.542374	808	-0.0153998	0.662044	0.869763	808	-0.0161088	0.647514	0.857751	808	-0.0142733	0.687621	0.871216	796	0.00660965	0.852296	0.946832	796	-0.0145167	0.68258	0.859201	796	-0.123181	0.000495527	0.0125041	796	0.018477	0.602698	0.84017	796	-0.0452768	0.201933	0.459912	796
ACOT9_23597	0.0261042	0.459533	0.786733	805	-0.0251273	0.476508	0.767615	805	0.000658202	0.985124	0.996175	805	-0.064378	0.0699984	0.309388	793	0.00110943	0.975116	0.992044	793	0.0303841	0.392843	0.665253	793	0.0334718	0.346525	0.61288	793	0.0172134	0.628383	0.851027	793	-0.0118203	0.739626	0.878436	793
ACOX1_51	0.049615	0.158833	0.529384	808	0.00961361	0.784966	0.921326	808	0.0354097	0.314757	0.635792	808	-0.100807	0.00441458	0.073434	796	-0.0200691	0.571811	0.809761	796	-0.0446919	0.207827	0.482319	796	-0.0345129	0.330808	0.599718	796	0.0159061	0.654088	0.863695	796	-0.0838687	0.0179485	0.115521	796
ACOX2_8309	-0.0138094	0.695097	0.900137	808	0.0113963	0.746352	0.906655	808	0.042688	0.225476	0.549083	808	-0.0496099	0.162014	0.461318	796	0.0172815	0.626372	0.839021	796	-0.0509684	0.150812	0.412099	796	-0.114234	0.0012447	0.022484	796	0.0495818	0.162253	0.486519	796	-0.0100091	0.777978	0.900492	796
ACOX3_8310	-0.00723899	0.837217	0.951791	808	0.0374595	0.287545	0.622426	808	0.0891597	0.011228	0.108207	808	-0.0605011	0.0880404	0.343257	796	0.00659008	0.852728	0.946964	796	-0.0504116	0.15533	0.417994	796	0.0274621	0.439091	0.689181	796	-0.0580449	0.101745	0.391494	796	0.0320253	0.366868	0.629024	796
ACOXL_55289	-0.0785995	0.0254689	0.244022	808	-0.0845463	0.0162238	0.15846	808	0.0438213	0.213387	0.534959	808	-0.148448	2.61118e-05	0.00385691	796	-0.112599	0.00146296	0.035916	796	-0.0792335	0.0253875	0.154035	796	-0.120443	0.00066124	0.0148791	796	-0.0208793	0.556388	0.817223	796	-0.141083	6.49164e-05	0.00294776	796
ACP1_52	0.0454186	0.197152	0.57446	808	0.0951813	0.00677875	0.097933	808	0.0694443	0.048461	0.250676	808	0.0923785	0.00911264	0.109557	796	0.123787	0.000464493	0.0186601	796	0.0191995	0.588588	0.80468	796	0.0467669	0.187468	0.44569	796	-0.0239334	0.500134	0.784917	796	0.0501978	0.157092	0.400083	796
ACP2_53	0.0312766	0.3746	0.728907	808	-0.0267822	0.447105	0.749818	808	-0.039319	0.26427	0.590605	808	0.00272058	0.938913	0.980081	796	-0.0182675	0.606817	0.828296	796	-0.00113632	0.974465	0.990291	796	-0.0142105	0.688923	0.856141	796	-0.0234464	0.508897	0.78972	796	-0.0103904	0.769755	0.895723	796
ACP4_93650	-0.0198166	0.573792	0.846198	808	-0.0329626	0.349388	0.677437	808	-0.0930261	0.00814631	0.090272	808	0.0058394	0.869344	0.956035	796	-0.00360854	0.919035	0.971152	796	-0.0199556	0.573987	0.795989	796	-0.0258904	0.465737	0.70871	796	-0.0208236	0.557441	0.817629	796	-0.0320828	0.366008	0.62841	796
ACP5_54	0.0208405	0.554156	0.834883	808	-0.011934	0.734825	0.90258	808	-0.0009103	0.979389	0.994433	808	-0.0694917	0.0500087	0.260062	796	-0.0860565	0.0151554	0.132586	796	-0.10325	0.00354249	0.0475429	796	-0.0623647	0.0786672	0.275213	796	-0.0590581	0.095899	0.380863	796	-0.034414	0.332197	0.597426	796
ACP6_51205	-0.0209053	0.552923	0.834404	808	-0.078566	0.0255317	0.197517	808	-0.0722859	0.0399508	0.224721	808	-0.0402832	0.25629	0.57497	796	-0.117056	0.000937152	0.027744	796	0.0282001	0.426887	0.694024	796	-0.00978548	0.782813	0.907942	796	0.0190741	0.591026	0.834456	796	-0.0737761	0.0374297	0.175881	796
ACP7_390928	-0.0908134	0.00980178	0.154215	808	-0.130258	0.000205049	0.011431	808	-0.106832	0.00236006	0.0432076	808	-0.0527461	0.137055	0.425563	796	-0.0397701	0.262402	0.56985	796	-0.0917128	0.00962754	0.0880523	796	0.00749728	0.832735	0.93263	796	-0.0152807	0.666855	0.869778	796	-0.0865855	0.0145404	0.101683	796
ACPP_55	6.04197e-05	0.998632	0.999438	808	-0.0132411	0.707054	0.890415	808	-0.0206551	0.557686	0.810747	808	-0.0113044	0.750146	0.901983	796	-0.03302	0.352164	0.652583	796	0.0336686	0.342781	0.622794	796	0.0124755	0.725261	0.876778	796	-0.0300066	0.39786	0.714743	796	-0.00308721	0.9307	0.970443	796
ACRBP_84519	0.0282095	0.423257	0.760846	808	-0.0386116	0.272966	0.608614	808	-0.0131462	0.709058	0.889987	808	0.0271871	0.443689	0.72636	796	-0.0232433	0.512576	0.771461	796	0.0290445	0.413167	0.681268	796	0.0365094	0.303582	0.573366	796	-0.0347488	0.327511	0.658679	796	-0.0953603	0.00709494	0.0647262	796
ACRV1_56	-0.0338483	0.336585	0.69902	808	-0.0863129	0.0141176	0.146882	808	-0.0885132	0.0118337	0.111262	808	0.0247023	0.486462	0.7548	796	0.0155432	0.661485	0.856591	796	0.0509306	0.151115	0.41246	796	-0.0142623	0.687848	0.855818	796	0.0541032	0.12722	0.431892	796	-0.00973876	0.783824	0.903131	796
ACR_49	0.0599476	0.0885824	0.4174	808	0.0123868	0.725163	0.898652	808	0.0700542	0.0465163	0.245066	808	0.0488682	0.16839	0.4696	796	0.124968	0.000409177	0.0171608	796	-0.02086	0.556753	0.78439	796	0.0587792	0.0974804	0.311263	796	-0.0444867	0.209924	0.542498	796	0.108308	0.00221376	0.0304547	796
ACSBG1_23205	0.0632977	0.0721331	0.38699	808	0.0708233	0.0441581	0.25959	808	0.0587665	0.0950548	0.354308	808	0.0187986	0.596399	0.823472	796	0.0796074	0.0247017	0.171773	796	0.008795	0.804326	0.917797	796	0.0702198	0.04765	0.209212	796	-0.0558286	0.115517	0.41298	796	0.114517	0.00121007	0.020781	796
ACSBG2_81616	-0.029449	0.403165	0.74837	808	-0.0952327	0.00674886	0.097933	808	-0.107679	0.00217673	0.041167	808	-0.0245582	0.489007	0.756217	796	0.0234769	0.508346	0.768414	796	-0.0373859	0.292113	0.574563	796	-0.0746842	0.0351409	0.176171	796	-0.0392798	0.268334	0.602439	796	-0.0712469	0.0444823	0.195482	796
ACSF2_80221	-0.0306617	0.384069	0.735732	808	-0.0236557	0.501919	0.783917	808	0.0303347	0.389163	0.698854	808	-0.117246	0.000919187	0.0310127	796	-0.0118811	0.737856	0.89458	796	-0.0196134	0.580575	0.800558	796	-0.111856	0.00157333	0.0258906	796	0.0721432	0.0418647	0.258752	796	-0.0461561	0.193303	0.449447	796
ACSF3_197322	-0.0455267	0.196088	0.573239	808	-0.00991227	0.778457	0.919132	808	-0.0419875	0.233188	0.557692	808	0.0275305	0.437952	0.721913	796	0.0150177	0.672251	0.860747	796	-0.0706598	0.0462707	0.21721	796	-0.0264153	0.45674	0.702274	796	0.00875253	0.805252	0.932946	796	-0.0881069	0.0128922	0.094262	796
ACSL1_2180	0.0410466	0.243838	0.62245	808	0.0264833	0.452194	0.751905	808	0.00627333	0.858686	0.954321	808	0.0335762	0.344108	0.654272	796	-0.00294283	0.933933	0.976378	796	0.0679596	0.0552914	0.239371	796	-0.00112011	0.974829	0.991275	796	0.0274884	0.438652	0.743332	796	0.0621824	0.0795467	0.274467	796
ACSL3_2181	0.0221586	0.52937	0.820806	808	-0.00509001	0.885136	0.958764	808	0.0711352	0.0432308	0.234567	808	-0.0312145	0.37913	0.681841	796	0.0342391	0.334661	0.639133	796	0.0501442	0.157536	0.420916	796	-0.0703439	0.0472577	0.208498	796	0.00985548	0.781299	0.921884	796	-0.0771093	0.0296045	0.152596	796
ACSL4_2182	0.0147314	0.676429	0.892126	805	0.0306666	0.384879	0.70309	805	-0.012384	0.725713	0.897767	805	0.0709495	0.0457903	0.248839	793	0.116248	0.00103979	0.0292984	793	-0.0410622	0.248096	0.527396	793	0.0141899	0.689906	0.856616	793	-0.0454768	0.200798	0.531259	793	0.0151616	0.669884	0.840197	793
ACSL5_51703	0.0084219	0.811083	0.943102	808	0.0687187	0.0508628	0.278912	808	0.0681772	0.0527192	0.261764	808	-0.0130402	0.71336	0.884458	796	0.00991576	0.779995	0.915071	796	0.0350686	0.323076	0.605732	796	0.0615663	0.0825785	0.28272	796	0.110687	0.00176261	0.0573339	796	0.0354125	0.318351	0.583972	796
ACSL6_23305	0.00356155	0.919485	0.978687	808	-0.047945	0.173347	0.497104	808	0.00619889	0.860345	0.955307	808	0.0373422	0.292678	0.61105	796	0.0525709	0.138367	0.41687	796	-0.0261219	0.461756	0.719342	796	0.021223	0.549905	0.770447	796	-0.0142916	0.687241	0.87847	796	0.0736809	0.0376768	0.17639	796
ACSM1_116285	-0.0278259	0.429592	0.765012	808	-0.095173	0.00678364	0.097933	808	-0.0530056	0.132214	0.42007	808	0.0329303	0.353475	0.661106	796	-0.0904296	0.0106936	0.110208	796	-0.000336035	0.992447	0.9974	796	9.36758e-05	0.997895	0.999171	796	0.0867741	0.0143265	0.153499	796	-0.0736929	0.0376458	0.176381	796
ACSM2A_123876	0.0125721	0.721222	0.909832	808	-0.0793929	0.0240181	0.191448	808	-0.0956386	0.00651657	0.080159	808	0.0607282	0.086852	0.340335	796	0.0281562	0.427606	0.713715	796	0.0415629	0.241479	0.520694	796	0.0845468	0.0170381	0.114587	796	-0.00474165	0.893744	0.965469	796	0.0285387	0.421354	0.675165	796
ACSM2B_348158	-0.0244719	0.487276	0.802848	808	-0.108242	0.00206233	0.0492946	808	-0.100015	0.00443132	0.0624296	808	0.0194132	0.584443	0.817736	796	-0.0754142	0.0333882	0.201777	796	0.00766186	0.829119	0.928544	796	-0.0271965	0.443531	0.692451	796	0.0822683	0.0202672	0.182202	796	-0.113143	0.00138667	0.0226339	796
ACSM3_6296	-0.0787272	0.0252304	0.24328	808	-0.0175261	0.61887	0.849308	808	-0.0303541	0.388859	0.698735	808	0.057675	0.103948	0.371925	796	-0.0152127	0.668249	0.859506	796	-0.0404003	0.25491	0.534764	796	-0.0397495	0.262649	0.532286	796	-0.0253491	0.475117	0.769056	796	-0.0360545	0.309651	0.576357	796
ACSM4_341392	0.00924213	0.793083	0.936489	808	-0.0353764	0.315214	0.64889	808	-0.0274531	0.435802	0.733905	808	0.0246643	0.487132	0.755074	796	0.014563	0.681624	0.865065	796	0.023246	0.512526	0.755395	796	-0.00827399	0.815703	0.923913	796	0.0824166	0.0200419	0.181197	796	0.0078443	0.825115	0.924288	796
ACSM5_54988	0.0192336	0.585118	0.850816	808	0.0124243	0.724364	0.898458	808	0.0149973	0.67035	0.869143	808	0.0188117	0.596142	0.823472	796	-0.019119	0.590152	0.819025	796	-0.00828218	0.815524	0.922476	796	0.0568397	0.109063	0.331023	796	0.0552015	0.119669	0.420186	796	-0.0629125	0.0760719	0.266837	796
ACSM6_142827	0.0330992	0.347394	0.708793	808	0.0615695	0.0802763	0.349543	808	0.0442653	0.208781	0.5289	808	0.0221148	0.533265	0.786911	796	0.0198031	0.576919	0.811806	796	-0.0139868	0.69357	0.866005	796	0.02146	0.545459	0.766987	796	-0.0650532	0.0665892	0.319534	796	4.7928e-06	0.999892	0.999961	796
ACSS1_84532	0.015072	0.668806	0.888866	808	-0.0175803	0.617785	0.848738	808	0.0133661	0.704417	0.887391	808	2.5595e-05	0.999425	0.999824	796	0.0106639	0.763872	0.907599	796	0.0272051	0.443388	0.706101	796	-0.00262658	0.941019	0.976651	796	-0.0423242	0.232959	0.567851	796	-0.00889484	0.802151	0.912499	796
ACSS2_55902	0.0319217	0.364824	0.722854	808	0.0657958	0.0615673	0.305861	808	0.0048538	0.890432	0.965518	808	-0.00879841	0.804252	0.927075	796	0.0528812	0.13605	0.413499	796	-0.00414972	0.906944	0.960464	796	0.0439021	0.215983	0.480368	796	-0.022754	0.521495	0.797	796	0.0720091	0.0422477	0.189045	796
ACSS3_79611	0.0831553	0.0180713	0.206347	808	0.119424	0.000669923	0.0244219	808	0.0862913	0.0141418	0.123184	808	-0.0173874	0.624258	0.839915	796	-0.0014902	0.966517	0.989463	796	1.33628e-05	0.9997	0.999995	796	-0.0215452	0.543865	0.765993	796	0.0277712	0.433956	0.741498	796	0.0425712	0.230242	0.494197	796
ACTA1_58	-0.0169909	0.629621	0.871906	808	-0.0414485	0.239248	0.574512	808	0.0729769	0.0380841	0.21916	808	0.0751006	0.0341319	0.217364	796	0.0617811	0.0815113	0.318693	796	0.0418381	0.238374	0.516938	796	0.0952661	0.00715199	0.0684291	796	-0.0113056	0.750122	0.90641	796	0.0517189	0.144881	0.384064	796
ACTA2_59	-0.0168868	0.631723	0.873107	808	-0.0190827	0.588065	0.8333	808	-0.0047493	0.892776	0.966383	808	-0.047361	0.18192	0.485145	796	-0.036079	0.309322	0.616528	796	-0.0227596	0.521392	0.761832	796	0.0466451	0.188622	0.447544	796	-0.0456638	0.198101	0.528601	796	-0.0943852	0.00770568	0.0688081	796
ACTBL2_345651	-0.0175383	0.618626	0.865874	808	0.00718308	0.838457	0.942117	808	-0.0183585	0.60231	0.833281	808	-0.0762385	0.0314996	0.207305	796	-0.0624936	0.07805	0.312588	796	-0.0596772	0.0924614	0.316377	796	-0.0722429	0.0415816	0.19447	796	-0.00312173	0.929927	0.979637	796	0.00067452	0.984841	0.994501	796
ACTB_60	0.0136448	0.700696	0.901969	796	0.0611033	0.084918	0.359138	796	0.148207	2.69211e-05	0.00195886	796	-0.106084	0.00272876	0.0574211	796	-0.0067123	0.850029	0.94588	796	-0.0530063	0.135125	0.388295	796	0.00615037	0.862453	0.94612	796	0.00679493	0.848205	0.950005	796	0.0281513	0.427687	0.679285	796
ACTC1_70	0.120437	0.000602125	0.0391014	808	0.0705254	0.0450592	0.262587	808	0.0500861	0.154909	0.454591	808	-0.0442073	0.212804	0.523659	796	0.055521	0.11754	0.383363	796	-0.00437351	0.90195	0.957703	796	0.00420725	0.90566	0.962141	796	-0.0677242	0.0561427	0.29604	796	0.0739602	0.0369557	0.174638	796
ACTG1_71	0.0718346	0.0412111	0.304636	808	0.014282	0.68521	0.881158	808	0.114304	0.00113482	0.0275612	808	-0.0891649	0.0118455	0.126394	796	-0.0280968	0.428582	0.71489	796	0.0274173	0.439839	0.703291	796	-0.0113648	0.748858	0.889608	796	-0.00273723	0.93854	0.982406	796	-0.0201168	0.570898	0.779873	796
ACTG2_72	0.0136072	0.699343	0.90126	808	0.061068	0.0827743	0.35555	808	0.0490054	0.164021	0.467764	808	-0.0536665	0.130323	0.415922	796	0.0521956	0.141208	0.42184	796	-0.0468689	0.186507	0.457072	796	-0.0384077	0.279114	0.549123	796	-0.0680892	0.0548271	0.292767	796	0.0133987	0.705841	0.859452	796
ACTL10_170487	0.043712	0.214532	0.591452	808	0.00350408	0.92078	0.971223	808	-0.0293789	0.404286	0.709968	808	-0.0114725	0.746558	0.900243	796	0.0756603	0.0328146	0.199844	796	-0.0559205	0.114918	0.356706	796	-0.00354835	0.920381	0.968769	796	-0.0677958	0.0558828	0.295637	796	0.0316298	0.372818	0.632464	796
ACTL6A_86	-0.0101861	0.774157	0.929734	796	-0.00633112	0.858453	0.949711	796	-0.0164569	0.642928	0.855177	796	0.0715637	0.0435416	0.24266	796	0.100698	0.00445792	0.0692697	796	0.0506046	0.153753	0.416272	796	0.00262743	0.941	0.976651	796	0.0228282	0.520137	0.796498	796	0.0806897	0.0228059	0.132222	796
ACTL6B_51412	0.0166398	0.639241	0.876639	796	0.0107948	0.76106	0.913232	796	0.0762725	0.0314238	0.196798	796	0.0698182	0.0489391	0.257008	796	-0.0144914	0.683103	0.865911	796	0.0454381	0.20033	0.473464	796	0.0255908	0.470916	0.712407	796	-0.0916923	0.00964376	0.127817	796	0.0202545	0.568264	0.77762	796
ACTL7A_10881	0.00272593	0.938333	0.984288	808	0.00233668	0.947125	0.980516	808	0.0531547	0.131128	0.41828	808	-0.064908	0.0672002	0.302192	796	0.0124981	0.724783	0.887452	796	-0.0665311	0.0606276	0.250273	796	0.0132866	0.70819	0.867134	796	0.000473365	0.989361	0.997714	796	-0.0525891	0.13823	0.374637	796
ACTL7B_10880	0.0806593	0.0218506	0.225321	808	0.0656856	0.0620049	0.307024	808	0.0128283	0.715783	0.892781	808	-0.0187424	0.597497	0.823484	796	-0.0061249	0.863017	0.950454	796	0.00230782	0.948166	0.978888	796	-0.000425394	0.990439	0.996012	796	-0.065398	0.0651571	0.315735	796	-0.00107287	0.97589	0.990154	796
ACTL8_81569	0.0285071	0.418381	0.757579	808	0.100437	0.00426637	0.0757082	808	0.0888124	0.0115498	0.109618	808	0.00293715	0.934061	0.979018	796	0.0405155	0.253556	0.56044	796	-0.0819702	0.020727	0.136091	796	-0.0470581	0.184733	0.44249	796	-0.0433539	0.221777	0.553988	796	0.0305039	0.390082	0.647505	796
ACTL9_284382	-0.11839	0.000746455	0.0437679	808	-0.0881337	0.0122026	0.136053	808	-0.115331	0.00102268	0.0260347	808	-0.0573566	0.105875	0.376337	796	-0.157177	8.3797e-06	0.00163029	796	-0.131485	0.000199242	0.00719098	796	-0.0597013	0.0923296	0.301582	796	0.0671689	0.0581945	0.301113	796	-0.104337	0.00320744	0.0389045	796
ACTN1_87	0.0648199	0.0655319	0.369539	808	0.00662234	0.850914	0.946609	808	0.0142201	0.686503	0.878084	808	0.000703135	0.984198	0.995017	796	0.0390709	0.27089	0.577994	796	0.0269825	0.447128	0.708046	796	-0.0102107	0.773626	0.903478	796	0.0117073	0.741554	0.902321	796	0.0202193	0.568937	0.778079	796
ACTN2_88	0.0460218	0.191263	0.56766	808	-0.0269659	0.443993	0.747459	808	-0.0067081	0.849006	0.950316	808	-0.034519	0.330722	0.643104	796	0.0331307	0.350552	0.651749	796	0.0612188	0.0843297	0.300943	796	-0.0156125	0.66007	0.837182	796	0.0228615	0.519528	0.796009	796	0.0337298	0.341904	0.606425	796
ACTN4_81	0.0586006	0.0959936	0.427535	808	-0.0343367	0.329655	0.660523	808	-0.0559531	0.112	0.385818	808	0.0513222	0.147994	0.442394	796	-0.0195279	0.582226	0.815269	796	-0.0181984	0.608178	0.816569	796	-0.0120242	0.734819	0.882679	796	0.0608564	0.0861872	0.361823	796	-0.0632092	0.0746954	0.264226	796
ACTR10_55860	0.0912213	0.00947582	0.151263	808	0.137586	8.72508e-05	0.00694758	808	0.0743064	0.0347006	0.207631	808	-0.00732425	0.836541	0.94039	796	0.0911274	0.0101016	0.106967	796	-0.0356101	0.315656	0.598291	796	0.0137982	0.697496	0.860739	796	0.098361	0.00547817	0.0992072	796	0.102396	0.00382782	0.0440333	796
ACTR1A_10121	0.0783417	0.0259563	0.246161	808	0.137519	8.79588e-05	0.00695315	808	0.142401	4.86049e-05	0.00298516	808	-0.00537853	0.879574	0.959949	796	0.0943069	0.00775673	0.0933866	796	0.0147692	0.677367	0.85756	796	-0.0412949	0.24453	0.511534	796	0.0274983	0.438487	0.743332	796	0.0529935	0.13522	0.369909	796
ACTR1B_10120	0.0210106	0.550926	0.833257	808	-0.0106325	0.762825	0.91357	808	-0.0274013	0.436668	0.734319	808	-0.0147521	0.677719	0.866799	796	-0.0129901	0.714413	0.882206	796	-0.0714224	0.043959	0.210812	796	-0.0249805	0.481565	0.720308	796	-0.0743839	0.0358842	0.241422	796	-0.0184559	0.603111	0.801066	796
ACTR2_10097	0.05861	0.0959405	0.427509	808	0.0514827	0.143709	0.455945	808	0.126348	0.000317758	0.0116963	808	0.0219178	0.536918	0.789225	796	0.0341473	0.335959	0.640188	796	0.0354977	0.317187	0.59963	796	0.0599759	0.0908387	0.298804	796	-0.0450534	0.20417	0.535272	796	0.0739006	0.0371087	0.175042	796
ACTR3B_57180	-0.0268391	0.446139	0.776212	808	0.0452468	0.198854	0.527425	808	-0.0317704	0.367102	0.681053	808	0.0682727	0.0541755	0.270922	796	0.0494543	0.163336	0.453745	796	0.0688636	0.0521208	0.232121	796	0.0834231	0.0185695	0.121503	796	0.0328808	0.3542	0.681468	796	0.12474	0.000419352	0.0106861	796
ACTR3C_653857	-0.0407882	0.246821	0.624096	808	-0.0457396	0.194002	0.521367	808	-0.045897	0.192471	0.507589	808	0.0164924	0.642213	0.848386	796	0.0584056	0.0996316	0.352151	796	-0.0352269	0.320895	0.60361	796	0.00409282	0.908214	0.963677	796	-0.0280305	0.429674	0.738764	796	0.0235917	0.506275	0.73358	796
ACTR3_10096	0.0393165	0.264299	0.639361	808	0.0153385	0.663307	0.870602	808	0.08503	0.0156213	0.130999	808	-0.021293	0.54859	0.796271	796	0.0230869	0.515418	0.77332	796	0.0288573	0.416187	0.684316	796	-0.0521442	0.1416	0.383898	796	0.0389034	0.272951	0.606613	796	-0.0497763	0.160609	0.405441	796
ACTR5_79913	0.0675583	0.0567495	0.346403	796	0.0908611	0.010324	0.124368	796	0.0937805	0.00810767	0.0899539	796	0.0512109	0.148876	0.443659	796	-0.0278986	0.431849	0.717215	796	0.0842249	0.0174652	0.123897	796	0.0563451	0.112183	0.336346	796	0.0952435	0.00716571	0.112244	796	-0.0195174	0.58243	0.787188	796
ACTR6_64431	0.0390604	0.27102	0.646182	796	0.0439583	0.215395	0.548916	796	0.118382	0.000818413	0.0223988	796	-0.0312532	0.378539	0.68134	796	0.049578	0.162285	0.452071	796	-0.0384552	0.27852	0.561003	796	-0.0801948	0.0236565	0.140389	796	-0.00320479	0.928067	0.978468	796	-0.00686575	0.846642	0.934935	796
ACTR8_93973	0.0366754	0.301388	0.673586	796	0.0286056	0.420266	0.730974	796	0.0328132	0.355191	0.671328	796	0.105525	0.00287416	0.0591584	796	0.0302461	0.394102	0.686247	796	0.118358	0.000820449	0.0185745	796	0.133767	0.000153636	0.00578077	796	-0.0252756	0.4764	0.770016	796	0.0530951	0.134472	0.368908	796
ACTRT1_139741	0.022448	0.524778	0.81878	805	0.0276784	0.432902	0.739099	805	-0.000634489	0.98566	0.996399	805	-0.0282105	0.427592	0.714866	793	0.00407461	0.908793	0.967785	793	0.00872717	0.806165	0.918439	793	-0.0208108	0.558429	0.775355	793	0.0661839	0.0624822	0.310744	793	0.0341396	0.336983	0.602236	793
ACTRT2_140625	0.0427803	0.224474	0.601008	808	0.0463531	0.188083	0.515769	808	0.0510649	0.146993	0.442497	808	0.0181174	0.609776	0.830545	796	-0.00476693	0.89318	0.962628	796	0.0115129	0.745695	0.891548	796	0.0661101	0.062279	0.241518	796	-0.0259093	0.465412	0.762031	796	0.0296694	0.403186	0.658873	796
ACTRT3_84517	0.0634218	0.0715753	0.385583	808	0.048736	0.166354	0.487364	808	0.021988	0.532545	0.798511	808	-0.0278912	0.431971	0.717867	796	0.0541727	0.126731	0.397348	796	0.0177151	0.617739	0.821895	796	-0.0147677	0.677398	0.848402	796	-0.172517	9.75992e-07	0.00136023	796	0.0945193	0.00761903	0.0683712	796
ACVR1B_91	-0.0243755	0.488993	0.802848	808	0.0050551	0.885918	0.958868	808	-0.0553036	0.116231	0.392521	808	-0.0533018	0.132959	0.420117	796	-0.0949145	0.00736855	0.091033	796	-0.0413762	0.243602	0.52291	796	-0.0369491	0.297792	0.568596	796	0.0622643	0.0791508	0.34765	796	-0.0450009	0.204698	0.46255	796
ACVR1C_130399	-0.0843772	0.0164392	0.197641	808	-0.0349822	0.320639	0.654043	808	0.0149704	0.670907	0.869554	808	-0.0730612	0.0393196	0.231146	796	-0.0288659	0.416047	0.704349	796	-0.0728953	0.0397696	0.20043	796	-0.0647883	0.0677072	0.253612	796	-0.0995734	0.00492515	0.0945922	796	-0.0518663	0.143737	0.382919	796
ACVR1_90	-0.0868973	0.0134759	0.179267	808	-0.0365093	0.299956	0.6357	808	-0.0528007	0.133718	0.422221	808	-0.0598263	0.0916481	0.350213	796	-0.0498872	0.159678	0.449021	796	-0.0531728	0.133901	0.386495	796	-0.0317347	0.371234	0.63441	796	-0.00810042	0.819502	0.937683	796	-0.069964	0.0484679	0.205473	796
ACVR2A_92	0.00022365	0.994935	0.998473	808	-0.0771892	0.0282348	0.208374	808	-0.0593795	0.0916497	0.348709	808	0.062571	0.0776815	0.324968	796	0.00846433	0.811542	0.928546	796	-0.0293021	0.409036	0.678048	796	-0.0154218	0.663966	0.839319	796	0.0159071	0.654069	0.863695	796	-0.0286654	0.419295	0.673236	796
ACVR2B_93	-0.0673253	0.0557542	0.343824	808	-0.0118421	0.736791	0.903471	808	-0.0112457	0.749591	0.908395	808	0.0505063	0.154555	0.451388	796	-0.0609042	0.0859405	0.327262	796	-0.0675931	0.0566216	0.241438	796	0.093839	0.00806796	0.0735502	796	-0.00355491	0.920234	0.975759	796	-0.031396	0.376363	0.635385	796
ACVRL1_94	-0.0628586	0.0741355	0.391731	808	-0.0153777	0.662498	0.869904	808	-0.00608956	0.862784	0.955827	808	-0.0734754	0.038215	0.228182	796	-0.0171257	0.629484	0.840173	796	-0.0940068	0.00795508	0.078077	796	-0.0619778	0.0805434	0.278297	796	-0.0558479	0.115391	0.412765	796	-0.0888968	0.0121034	0.0905455	796
ACY1_95	0.0521393	0.138663	0.502358	808	0.0805632	0.0220088	0.183336	808	0.114692	0.00109124	0.0270096	808	-0.0312884	0.378002	0.680508	796	0.0154949	0.66247	0.856759	796	-0.00982268	0.782008	0.907825	796	-0.01763	0.619428	0.813936	796	0.0866553	0.0144609	0.154392	796	-0.032199	0.364273	0.626586	796
ACY3_91703	-0.0511859	0.146036	0.512569	808	-0.0470026	0.181963	0.508927	808	0.0322686	0.359633	0.674587	808	-0.108267	0.00222241	0.050524	796	-0.0542293	0.126334	0.3969	796	-0.0840604	0.0176869	0.124812	796	-0.0207804	0.558259	0.775297	796	-0.0393551	0.267418	0.601916	796	-0.0923029	0.00916983	0.0765484	796
ACYP1_97	-0.00467005	0.894555	0.971615	808	-0.0278566	0.429083	0.736814	808	0.0212115	0.547122	0.805011	808	-0.0514203	0.147219	0.441682	796	-0.0543687	0.125361	0.395397	796	-0.0687093	0.052651	0.233692	796	-0.0961873	0.00661132	0.0648883	796	-0.0520866	0.142041	0.455847	796	-0.0640546	0.0708844	0.256652	796
ACYP2_98	0.0447102	0.204238	0.58075	808	0.0551803	0.117048	0.41795	808	0.013632	0.698821	0.884212	808	0.00266486	0.940161	0.980229	796	-0.0486011	0.17073	0.462721	796	-0.0133234	0.707419	0.873117	796	-0.023759	0.503263	0.737178	796	-0.0297366	0.402121	0.718104	796	0.023314	0.511294	0.737139	796
ADA2_51816	-0.0620927	0.0777362	0.397952	808	-0.0526232	0.135031	0.445059	808	0.00940295	0.789566	0.925135	808	-0.070766	0.0459427	0.249144	796	-0.00403394	0.909529	0.968148	796	-0.0193689	0.585303	0.803601	796	-0.0217935	0.539231	0.763683	796	-0.0614233	0.0832956	0.356183	796	-0.10565	0.00284109	0.0359964	796
ADAD1_132612	-0.0847021	0.0160276	0.194633	808	-0.0383667	0.276022	0.61056	808	0.0387976	0.270661	0.596561	808	-0.0454111	0.200597	0.509237	796	-0.0331804	0.34983	0.651749	796	-0.0156027	0.660269	0.847499	796	0.014168	0.689804	0.856616	796	-0.101318	0.0042176	0.0879603	796	0.00919261	0.795671	0.908323	796
[truncated: 17,877 more rows]

## Sheet: DRIVE_codependencies
Supplementary Table S3c: DRIVE telomere protein codependencies
Genome-wide codependencies with CST and shelterin members in the DRIVE panel
[truncated: 7,976 more rows]

## Sheet: Achilles_codependencies
Supplementary Table S3d: Achilles telomere protein codependencies
[truncated: 16,757 more rows]

[truncated: 6 more sheets: Avana_mutation_comparisons, DRIVE_mutation_comparisons, Achilles_mutation_comparisons, Avana_proteomics_comparisons, DRIVE_proteomics_comparisons, Achilles_proteomics_comparisons]
