# Supplementary material for: Integrated evaluation of telomerase activation and telomere maintenance across cancer cell lines
Source: eLife. 2021 Sep 6;10:e66198. doi: 10.7554/eLife.66198 (PMC8530513; doi:10.7554/eLife.66198)
Supplement: Supplementary file 4. [file elife-66198-supp4.xlsx]

## Sheet: TERT_SNP_counts
Supplementary Table S4a: SNP read counts for TERT
SNP-level allele-specific estimates for TERT
	Achilles_ID	CCLE_name	Disease	Exon_chromosome	Exon_start	Exon_end	Gene_name	SNP	DNA_ref_count	DNA_alt_count	RNA_ref_count	RNA_alt_count	DNA_total_count	RNA_total_count	DNA_source	DNA_ref_frac	RNA_ref_frac	DNA_ratio	RNA_ratio	RNA_DNA_foldchange	RNA_DNA_foldchange_pseudo	MAE	CCLE_WGS_linkage_disequilibrium	CCLE_WES_linkage_disequilibrium
0	ACH-000005	HEL9217_HAEMATOPOIETIC_AND_LYMPHOID_TISSUE	Blood	chr5	1293428	1294781	TERT	5_1294086_C_T	48	19			67		CCLE_WGS	0.716418		2.52632					0.0152882	0.00793388
1	ACH-000007	LS513_LARGE_INTESTINE	Colorectal	chr5	1293428	1294781	TERT	5_1294086_C_T	18	9	30	0	27	30	CCLE_WGS	0.666667	1	2	inf	inf	31.3243	1	0.0152882	0.00793388
2	ACH-000009	C2BBE1_LARGE_INTESTINE	Colorectal	chr5	1293428	1294781	TERT	5_1294086_C_T	19	37			56		CCLE_WGS	0.339286		0.513514					0.0152882	0.00793388
3	ACH-000009	C2BBE1_LARGE_INTESTINE	Colorectal	chr5	1255402	1255526	TERT	5_1255520_G_A	40	16	16	2	56	18	CCLE_WGS	0.714286	0.888889	2.5	8	3.2	2.68889	0	0.00300012	0.00495868
4	ACH-000018	T24_URINARY_TRACT	Urinary tract	chr5	1293428	1294781	TERT	5_1294086_C_T	31	17	12	0	48	12	CCLE_WGS	0.645833	1	1.82353	inf	inf	13.8889	1	0.0152882	0.00793388
5	ACH-000019	MCF7_BREAST	Breast	chr5	1293428	1294781	TERT	5_1294086_C_T	23	36			59		CCLE_WGS	0.389831		0.638889					0.0152882	0.00793388
6	ACH-000021	NCIH1693_LUNG	Lung	chr5	1253282	1253946	TERT	5_1253744_G_A	21	33	5	22	54	27	CCLE_WGS	0.388889	0.185185	0.636364	0.227273	0.357143	0.380879	0	-0.00562643
7	ACH-000021	NCIH1693_LUNG	Lung	chr5	1293428	1294781	TERT	5_1294086_C_T	35	24	19	4	59	23	CCLE_WGS	0.59322	0.826087	1.45833	4.75	3.25714	2.99061	0	0.0152882	0.00793388
8	ACH-000023	PATU8988T_PANCREAS	Pancreas	chr5	1254483	1254620	TERT	5_1254594_C_T	15	35	0	14	50	14	CCLE_WGS	0.3	0	0.428571	0	0	0.0789766	1	-0.00323017	-0.00231405
9	ACH-000024	OPM2_HAEMATOPOIETIC_AND_LYMPHOID_TISSUE	Plasma cell	chr5	1293428	1294781	TERT	5_1294163_C_T	22	17			39		CCLE_WGS	0.564103		1.29412					-0.000575104
10	ACH-000024	OPM2_HAEMATOPOIETIC_AND_LYMPHOID_TISSUE	Plasma cell	chr5	1293428	1294781	TERT	5_1294263_C_T	24	23			47		CCLE_WGS	0.510638		1.04348					-0.000575104
11	ACH-000044	MDAMB134VI_BREAST	Breast	chr5	1293428	1294781	TERT	5_1294086_C_T	20	15			35		CCLE_WGS	0.571429		1.33333					0.0152882	0.00793388
12	ACH-000045	MV411_HAEMATOPOIETIC_AND_LYMPHOID_TISSUE	Blood	chr5	1293428	1294781	TERT	5_1294086_C_T	16	18			34		CCLE_WGS	0.470588		0.888889					0.0152882	0.00793388
13	ACH-000045	MV411_HAEMATOPOIETIC_AND_LYMPHOID_TISSUE	Blood	chr5	1255402	1255526	TERT	5_1255520_G_A	13	11	0	23	24	23	CCLE_WGS	0.541667	0	1.18182	0	0	0.0181245	1	0.00300012	0.00495868
14	ACH-000047	GCIY_STOMACH	Gastric	chr5	1293428	1294781	TERT	5_1294086_C_T	24	12	8	0	36	8	CCLE_WGS	0.666667	1	2	inf	inf	8.67347	1	0.0152882	0.00793388
15	ACH-000051	TE617T_SOFT_TISSUE	Soft tissue	chr5	1255402	1255526	TERT	5_1255520_G_A	30	27	15	18	57	33	CCLE_WES	0.526316	0.454545	1.11111	0.833333	0.75	0.755428	0	0.00300012	0.00495868
16	ACH-000060	PANC1005_PANCREAS	Pancreas	chr5	1293428	1294781	TERT	5_1294086_C_T	17	14			31		CCLE_WGS	0.548387		1.21429					0.0152882	0.00793388
17	ACH-000060	PANC1005_PANCREAS	Pancreas	chr5	1278756	1278911	TERT	5_1278852_G_A	18	14	11	0	32	11	CCLE_WGS	0.5625	1	1.28571	inf	inf	18.027	1	-0.000575104
18	ACH-000068	REC1_HAEMATOPOIETIC_AND_LYMPHOID_TISSUE	Lymphocyte	chr5	1253282	1253946	TERT	5_1253744_G_A	23	21	30	28	44	58	CCLE_WGS	0.522727	0.517241	1.09524	1.07143	0.978261	0.979097	0	-0.00562643
19	ACH-000069	HS611T_HAEMATOPOIETIC_AND_LYMPHOID_TISSUE	Lymphocyte	chr5	1255402	1255526	TERT	5_1255520_G_A	22	20	18	4	42	22	CCLE_WES	0.52381	0.818182	1.1	4.5	4.09091	3.74568	0	0.00300012	0.00495868
20	ACH-000075	U87MG_CENTRAL_NERVOUS_SYSTEM	Central nervous system	chr5	1293428	1294781	TERT	5_1294086_C_T	14	9			23		CCLE_WGS	0.608696		1.55556					0.0152882	0.00793388
21	ACH-000093	PANC0504_PANCREAS	Pancreas	chr5	1255402	1255526	TERT	5_1255520_G_A	15	17	1	10	32	11	CCLE_WES	0.46875	0.0909091	0.882353	0.1	0.113333	0.16129	1	0.00300012	0.00495868
22	ACH-000096	G401_SOFT_TISSUE	Kidney	chr5	1253282	1253946	TERT	5_1253744_G_A	18	18			36		CCLE_WGS	0.5		1					-0.00562643
23	ACH-000098	GAMG_CENTRAL_NERVOUS_SYSTEM	Central nervous system	chr5	1255402	1255526	TERT	5_1255520_G_A	39	28	18	0	67	18	CCLE_WGS	0.58209	1	1.39286	inf	inf	26.6962	1	0.00300012	0.00495868
24	ACH-000109	NCIH3255_LUNG	Lung	chr5	1293428	1294781	TERT	5_1294086_C_T	15	60			75		CCLE_WGS	0.2		0.25					0.0152882	0.00793388
25	ACH-000109	NCIH3255_LUNG	Lung	chr5	1253282	1253946	TERT	5_1253744_G_A	40	19			59		CCLE_WGS	0.677966		2.10526					-0.00562643
26	ACH-000117	EFM192A_BREAST	Breast	chr5	1253282	1253946	TERT	5_1253744_G_A	15	17			32		CCLE_WGS	0.46875		0.882353					-0.00562643
27	ACH-000117	EFM192A_BREAST	Breast	chr5	1254483	1254620	TERT	5_1254594_C_T	18	16			34		CCLE_WGS	0.529412		1.125					-0.00323017	-0.00231405
28	ACH-000117	EFM192A_BREAST	Breast	chr5	1255402	1255526	TERT	5_1255520_G_A	26	21			47		CCLE_WGS	0.553191		1.2381					0.00300012	0.00495868
29	ACH-000120	CHP212_AUTONOMIC_GANGLIA	Peripheral nervous system	chr5	1293428	1294781	TERT	5_1294086_C_T	27	27			54		CCLE_WGS	0.5		1					0.0152882	0.00793388
30	ACH-000120	CHP212_AUTONOMIC_GANGLIA	Peripheral nervous system	chr5	1293428	1294781	TERT	5_1294166_C_T	22	39			61		CCLE_WGS	0.360656		0.564103					0.00216622
31	ACH-000126	KG1C_CENTRAL_NERVOUS_SYSTEM	Central nervous system	chr5	1255402	1255526	TERT	5_1255520_G_A	33	30			63		CCLE_WES	0.52381		1.1					0.00300012	0.00495868
32	ACH-000129	NCIH1341_LUNG	Lung	chr5	1253282	1253946	TERT	5_1253744_G_A	14	10			24		CCLE_WGS	0.583333		1.4					-0.00562643
33	ACH-000130	NALM19_HAEMATOPOIETIC_AND_LYMPHOID_TISSUE	Blood	chr5	1255402	1255526	TERT	5_1255520_G_A	46	17	0	81	63	81	CCLE_WES	0.730159	0	2.70588	0	0	0.00230886	1	0.00300012	0.00495868
34	ACH-000132	JHOS2_OVARY	Ovary	chr5	1255402	1255526	TERT	5_1255520_G_A	15	19			34		CCLE_WGS	0.441176		0.789474					0.00300012	0.00495868
35	ACH-000132	JHOS2_OVARY	Ovary	chr5	1255402	1255526	TERT	5_1255520_G_A	8	28			36		CCLE_WES	0.222222		0.285714					0.00300012	0.00495868
36	ACH-000140	PFEIFFER_HAEMATOPOIETIC_AND_LYMPHOID_TISSUE	Lymphocyte	chr5	1264519	1264707	TERT	5_1264587_G_A	36	20	33	13	56	46	CCLE_WES	0.642857	0.717391	1.8	2.53846	1.41026	1.39371	0		0
37	ACH-000141	SNU308_BILIARY_TRACT	Bile duct	chr5	1255402	1255526	TERT	5_1255520_G_A	17	27			44		CCLE_WES	0.386364		0.62963					0.00300012	0.00495868
38	ACH-000145	SKLMS1_SOFT_TISSUE	Soft tissue	chr5	1293428	1294781	TERT	5_1294086_C_T	23	15			38		CCLE_WGS	0.605263		1.53333					0.0152882	0.00793388
39	ACH-000145	SKLMS1_SOFT_TISSUE	Soft tissue	chr5	1253282	1253946	TERT	5_1253744_G_A	18	21			39		CCLE_WGS	0.461538		0.857143					-0.00562643
40	ACH-000146	THP1_HAEMATOPOIETIC_AND_LYMPHOID_TISSUE	Blood	chr5	1255402	1255526	TERT	5_1255520_G_A	17	24	1	26	41	27	CCLE_WGS	0.414634	0.037037	0.708333	0.0384615	0.0542986	0.0792453	1	0.00300012	0.00495868
41	ACH-000147	T47D_BREAST	Breast	chr5	1255402	1255526	TERT	5_1255520_G_A	29	52			81		CCLE_WGS	0.358025		0.557692					0.00300012	0.00495868
42	ACH-000151	JM1_HAEMATOPOIETIC_AND_LYMPHOID_TISSUE	Blood	chr5	1253282	1253946	TERT	5_1253918_C_T	23	8	51	25	31	76	CCLE_WES	0.741935	0.671053	2.875	2.04	0.709565	0.730496	0	-0.00207996	0
43	ACH-000153	NCIH2052_PLEURA	Lung	chr5	1293428	1294781	TERT	5_1294331_G_A	80	13			93		CCLE_WGS	0.860215		6.15385					0.00252087
44	ACH-000159	OSRC2_KIDNEY	Kidney	chr5	1293428	1294781	TERT	5_1294086_C_T	63	11	34	0	74	34	CCLE_WGS	0.851351	1	5.72727	inf	inf	12.4961	1	0.0152882	0.00793388
45	ACH-000163	SW579_THYROID	Thyroid	chr5	1293428	1294781	TERT	5_1294086_C_T	20	16			36		CCLE_WGS	0.555556		1.25					0.0152882	0.00793388
46	ACH-000164	PANC1_PANCREAS	Pancreas	chr5	1293428	1294781	TERT	5_1294086_C_T	18	21			39		CCLE_WGS	0.461538		0.857143					0.0152882	0.00793388
47	ACH-000179	NCIH1618_LUNG	Lung	chr5	1293428	1294781	TERT	5_1294086_C_T	24	40			64		CCLE_WGS	0.375		0.6					0.0152882	0.00793388
48	ACH-000179	NCIH1618_LUNG	Lung	chr5	1253282	1253946	TERT	5_1253744_G_A	42	22	5	4	64	9	CCLE_WGS	0.65625	0.555556	1.90909	1.25	0.654762	0.647059	0	-0.00562643
49	ACH-000187	CORL311_LUNG	Lung	chr5	1253282	1253946	TERT	5_1253744_G_A	25	268	0	244	293	244	CCLE_WGS	0.0853242	0	0.0932836	0	0	0.0215325	1	-0.00562643
50	ACH-000192	MFE280_ENDOMETRIUM	Uterus	chr5	1253282	1253946	TERT	5_1253744_G_A	10	30			40		CCLE_WGS	0.25		0.333333					-0.00562643
51	ACH-000192	MFE280_ENDOMETRIUM	Uterus	chr5	1293428	1294781	TERT	5_1294086_C_T	14	26			40		CCLE_WGS	0.35		0.538462					0.0152882	0.00793388
52	ACH-000198	EOL1_HAEMATOPOIETIC_AND_LYMPHOID_TISSUE	Blood	chr5	1293428	1294781	TERT	5_1294086_C_T	18	16			34		CCLE_WGS	0.529412		1.125					0.0152882	0.00793388
53	ACH-000201	A204_SOFT_TISSUE	Soft tissue	chr5	1293428	1294781	TERT	5_1294086_C_T	22	16			38		CCLE_WGS	0.578947		1.375					0.0152882	0.00793388
54	ACH-000210	CADOES1_BONE	Bone	chr5	1255402	1255526	TERT	5_1255520_G_A	17	20	11	5	37	16	CCLE_WES	0.459459	0.6875	0.85	2.2	2.58824	2.44935	0	0.00300012	0.00495868
55	ACH-000211	DAOY_CENTRAL_NERVOUS_SYSTEM	Central nervous system	chr5	1253282	1253946	TERT	5_1253744_G_A	16	18	0	30	34	30	CCLE_WGS	0.470588	0	0.888889	0	0	0.0183805	1	-0.00562643
56	ACH-000211	DAOY_CENTRAL_NERVOUS_SYSTEM	Central nervous system	chr5	1260589	1260715	TERT	5_1260644_C_T	22	15	65	0	37	65	CCLE_WGS	0.594595	1	1.46667	inf	inf	90.2444	1	0.00252087
57	ACH-000212	CAL120_BREAST	Breast	chr5	1253282	1253946	TERT	5_1253744_G_A	36	23			59		CCLE_WGS	0.610169		1.56522					-0.00562643
58	ACH-000212	CAL120_BREAST	Breast	chr5	1255402	1255526	TERT	5_1255520_G_A	30	41			71		CCLE_WGS	0.422535		0.731707					0.00300012	0.00495868
59	ACH-000219	A375_SKIN	Skin	chr5	1282544	1282739	TERT	5_1282588_G_A	17	23	0	12	40	12	CCLE_WGS	0.425	0	0.73913	0	0	0.0537143	1	0.00252087
60	ACH-000220	MINO_HAEMATOPOIETIC_AND_LYMPHOID_TISSUE	Lymphocyte	chr5	1254483	1254620	TERT	5_1254594_C_T	28	10	103	129	38	232	CCLE_WES	0.736842	0.443966	2.8	0.79845	0.285161	0.294452	0	-0.00323017	-0.00231405
61	ACH-000223	HCC1937_BREAST	Breast	chr5	1293428	1294781	TERT	5_1294166_C_T	24	56			80		CCLE_WGS	0.3		0.428571					0.00216622
62	ACH-000223	HCC1937_BREAST	Breast	chr5	1255402	1255526	TERT	5_1255520_G_A	59	49			108		CCLE_WGS	0.546296		1.20408					0.00300012	0.00495868
63	ACH-000224	HS819T_FIBROBLAST	Fibroblast	chr5	1255402	1255526	TERT	5_1255520_G_A	16	14			30		CCLE_WES	0.533333		1.14286					0.00300012	0.00495868
64	ACH-000228	BICR31_UPPER_AERODIGESTIVE_TRACT	Upper aerodigestive	chr5	1255402	1255526	TERT	5_1255520_G_A	57	14			71		CCLE_WES	0.802817		4.07143					0.00300012	0.00495868
65	ACH-000238	SCC4_UPPER_AERODIGESTIVE_TRACT	Upper aerodigestive	chr5	1293428	1294781	TERT	5_1294086_C_T	51	69			120		CCLE_WGS	0.425		0.73913					0.0152882	0.00793388
66	ACH-000238	SCC4_UPPER_AERODIGESTIVE_TRACT	Upper aerodigestive	chr5	1255402	1255526	TERT	5_1255520_G_A	93	55			148		CCLE_WGS	0.628378		1.69091					0.00300012	0.00495868
67	ACH-000238	SCC4_UPPER_AERODIGESTIVE_TRACT	Upper aerodigestive	chr5	1293428	1294781	TERT	5_1293833_G_A	100	13			113		CCLE_WGS	0.884956		7.69231					-0.000575104
68	ACH-000241	JK1_HAEMATOPOIETIC_AND_LYMPHOID_TISSUE	Blood	chr5	1255402	1255526	TERT	5_1255520_G_A	28	18			46		CCLE_WES	0.608696		1.55556					0.00300012	0.00495868
69	ACH-000243	DANG_PANCREAS	Pancreas	chr5	1293428	1294781	TERT	5_1294086_C_T	32	26			58		CCLE_WGS	0.551724		1.23077					0.0152882	0.00793388
70	ACH-000247	OCUM1_STOMACH	Gastric	chr5	1280273	1280453	TERT	5_1280381_G_A	12	20	9	7	32	16	CCLE_WGS	0.375	0.5625	0.6	1.28571	2.14286	2.07733	0	-0.000575104
71	ACH-000247	OCUM1_STOMACH	Gastric	chr5	1293428	1294781	TERT	5_1293741_G_A	20	18	6	5	38	11	CCLE_WGS	0.526316	0.545455	1.11111	1.2	1.08	1.06652	0	-0.000575104
72	ACH-000247	OCUM1_STOMACH	Gastric	chr5	1293428	1294781	TERT	5_1294086_C_T	24	22	2	6	46	8	CCLE_WGS	0.521739	0.25	1.09091	0.333333	0.305556	0.353218	0	0.0152882	0.00793388
73	ACH-000249	CL11_LARGE_INTESTINE	Colorectal	chr5	1255402	1255526	TERT	5_1255520_G_A	9	15	1	12	24	13	CCLE_WES	0.375	0.0769231	0.6	0.0833333	0.138889	0.195789	1	0.00300012	0.00495868
74	ACH-000253	COLO201_LARGE_INTESTINE	Colorectal	chr5	1293428	1294781	TERT	5_1294086_C_T	15	14			29		CCLE_WGS	0.517241		1.07143					0.0152882	0.00793388
75	ACH-000253	COLO201_LARGE_INTESTINE	Colorectal	chr5	1268635	1268748	TERT	5_1268700_C_T	31	12			43		CCLE_WGS	0.72093		2.58333					-0.000575104	-0.00115702
76	ACH-000253	COLO201_LARGE_INTESTINE	Colorectal	chr5	1268635	1268748	TERT	5_1268700_C_T	33	26			59		CCLE_WES	0.559322		1.26923					-0.000575104	-0.00115702
77	ACH-000253	COLO201_LARGE_INTESTINE	Colorectal	chr5	1255402	1255526	TERT	5_1255520_G_A	32	33			65		CCLE_WES	0.492308		0.969697					0.00300012	0.00495868
78	ACH-000253	COLO201_LARGE_INTESTINE	Colorectal	chr5	1255402	1255526	TERT	5_1255520_G_A	24	27			51		CCLE_WGS	0.470588		0.888889					0.00300012	0.00495868
79	ACH-000264	CALU6_LUNG	Lung	chr5	1253282	1253946	TERT	5_1253744_G_A	26	11			37		CCLE_WGS	0.702703		2.36364					-0.00562643
80	ACH-000270	HPAC_PANCREAS	Pancreas	chr5	1255402	1255526	TERT	5_1255520_G_A	56	41	23	1	97	24	CCLE_WGS	0.57732	0.958333	1.36585	23	16.8393	11.5074	1	0.00300012	0.00495868
81	ACH-000270	HPAC_PANCREAS	Pancreas	chr5	1279406	1279585	TERT	5_1279439_G_A	60	51			111		CCLE_WGS	0.540541		1.17647					0.00079556
82	ACH-000275	HS834T_FIBROBLAST	Fibroblast	chr5	1268635	1268748	TERT	5_1268700_C_T	48	29			77		CCLE_WES	0.623377		1.65517					-0.000575104	-0.00115702
83	ACH-000276	HCC38_BREAST	Breast	chr5	1253282	1253946	TERT	5_1253744_G_A	21	30			51		CCLE_WGS	0.411765		0.7					-0.00562643
84	ACH-000277	HCC1419_BREAST	Breast	chr5	1293428	1294781	TERT	5_1294086_C_T	28	16			44		CCLE_WGS	0.636364		1.75					0.0152882	0.00793388
85	ACH-000278	COV362_OVARY	Ovary	chr5	1293428	1294781	TERT	5_1294086_C_T	21	18			39		CCLE_WGS	0.538462		1.16667					0.0152882	0.00793388
86	ACH-000290	NCIH209_LUNG	Lung	chr5	1293428	1294781	TERT	5_1294166_C_T	15	41	12	15	56	27	CCLE_WGS	0.267857	0.444444	0.365854	0.8	2.18667	2.15921	0	0.00216622
87	ACH-000293	KLE_ENDOMETRIUM	Uterus	chr5	1293428	1294781	TERT	5_1294086_C_T	33	11			44		CCLE_WGS	0.75		3					0.0152882	0.00793388
88	ACH-000297	NCIH889_LUNG	Lung	chr5	1254483	1254620	TERT	5_1254594_C_T	27	49	11	15	76	26	CCLE_WGS	0.355263	0.423077	0.55102	0.733333	1.33086	1.33548	0	-0.00323017	-0.00231405
89	ACH-000297	NCIH889_LUNG	Lung	chr5	1254483	1254620	TERT	5_1254594_C_T	27	39	11	15	66	26	CCLE_WES	0.409091	0.423077	0.692308	0.733333	1.05926	1.06569	0	-0.00323017	-0.00231405
90	ACH-000297	NCIH889_LUNG	Lung	chr5	1253282	1253946	TERT	5_1253744_G_A	16	26	6	18	42	24	CCLE_WGS	0.380952	0.25	0.615385	0.333333	0.541667	0.564292	0	-0.00562643
91	ACH-000302	SNU1077_ENDOMETRIUM	Uterus	chr5	1278756	1278911	TERT	5_1278814_C_T	496	45	10	0	541	10	CCLE_WES	0.916821	1	11.0222	inf	inf	1.92447	0		0
92	ACH-000308	EFO21_OVARY	Ovary	chr5	1293428	1294781	TERT	5_1294086_C_T	55	15			70		CCLE_WGS	0.785714		3.66667					0.0152882	0.00793388
93	ACH-000308	EFO21_OVARY	Ovary	chr5	1253282	1253946	TERT	5_1253918_C_T	11	65	4	16	76	20	CCLE_WGS	0.144737	0.2	0.169231	0.25	1.47727	1.55336	0	-0.00207996	0
94	ACH-000309	SKLU1_LUNG	Lung	chr5	1253282	1253946	TERT	5_1253744_G_A	27	27			54		CCLE_WGS	0.5		1					-0.00562643
95	ACH-000309	SKLU1_LUNG	Lung	chr5	1255402	1255526	TERT	5_1255520_G_A	24	29			53		CCLE_WGS	0.45283		0.827586					0.00300012	0.00495868
96	ACH-000309	SKLU1_LUNG	Lung	chr5	1293428	1294781	TERT	5_1294086_C_T	21	31			52		CCLE_WGS	0.403846		0.677419					0.0152882	0.00793388
97	ACH-000311	NCIH2122_LUNG	Lung	chr5	1255402	1255526	TERT	5_1255520_G_A	30	40	0	8	70	8	CCLE_WGS	0.428571	0	0.75	0	0	0.0781099	1	0.00300012	0.00495868
98	ACH-000321	MOLM6_HAEMATOPOIETIC_AND_LYMPHOID_TISSUE	Blood	chr5	1255402	1255526	TERT	5_1255520_G_A	21	19	31	23	40	54	CCLE_WES	0.525	0.574074	1.10526	1.34783	1.21946	1.21573	0	0.00300012	0.00495868
99	ACH-000322	HT144_SKIN	Skin	chr5	1253282	1253946	TERT	5_1253744_G_A	17	17			34		CCLE_WGS	0.5		1					-0.00562643
100	ACH-000324	JHOC5_OVARY	Ovary	chr5	1255402	1255526	TERT	5_1255520_G_A	21	29	16	0	50	16	CCLE_WES	0.42	1	0.724138	inf	inf	45.2791	1	0.00300012	0.00495868
101	ACH-000326	JURLMK1_HAEMATOPOIETIC_AND_LYMPHOID_TISSUE	Blood	chr5	1255402	1255526	TERT	5_1255520_G_A	23	19	8	17	42	25	CCLE_WES	0.547619	0.32	1.21053	0.470588	0.388747	0.40304	0	0.00300012	0.00495868
102	ACH-000334	DB_HAEMATOPOIETIC_AND_LYMPHOID_TISSUE	Lymphocyte	chr5	1293428	1294781	TERT	5_1294086_C_T	23	27	6	6	50	12	CCLE_WGS	0.46	0.5	0.851852	1	1.17391	1.17021	0	0.0152882	0.00793388
103	ACH-000351	MKN1_STOMACH	Gastric	chr5	1255402	1255526	TERT	5_1255520_G_A	48	26			74		CCLE_WGS	0.648649		1.84615					0.00300012	0.00495868
104	ACH-000351	MKN1_STOMACH	Gastric	chr5	1293428	1294781	TERT	5_1294086_C_T	17	32			49		CCLE_WGS	0.346939		0.53125					0.0152882	0.00793388
105	ACH-000354	CAPAN1_PANCREAS	Pancreas	chr5	1293428	1294781	TERT	5_1294166_C_T	37	21			58		CCLE_WGS	0.637931		1.7619					0.00216622
106	ACH-000356	MKN45_STOMACH	Gastric	chr5	1293428	1294781	TERT	5_1294086_C_T	28	46	7	11	74	18	CCLE_WGS	0.378378	0.388889	0.608696	0.636364	1.04545	1.06407	0	0.0152882	0.00793388
107	ACH-000358	NCIH69_LUNG	Lung	chr5	1253282	1253946	TERT	5_1253744_G_A	31	23	15	11	54	26	CCLE_WGS	0.574074	0.576923	1.34783	1.36364	1.01173	1.00552	0	-0.00562643
108	ACH-000358	NCIH69_LUNG	Lung	chr5	1293428	1294781	TERT	5_1294086_C_T	26	36	6	6	62	12	CCLE_WGS	0.419355	0.5	0.722222	1	1.38462	1.37736	0	0.0152882	0.00793388
109	ACH-000361	SKHEP1_LIVER	Liver	chr5	1293428	1294781	TERT	5_1294086_C_T	30	16	4	4	46	8	CCLE_WGS	0.652174	0.5	1.875	1	0.533333	0.540984	0	0.0152882	0.00793388
110	ACH-000361	SKHEP1_LIVER	Liver	chr5	1271234	1271319	TERT	5_1271311_G_C	22	36			58		CCLE_WGS	0.37931		0.611111					-0.00115021
111	ACH-000362	MOLM13_HAEMATOPOIETIC_AND_LYMPHOID_TISSUE	Blood	chr5	1255402	1255526	TERT	5_1255520_G_A	21	20	0	35	41	35	CCLE_WES	0.512195	0	1.05	0	0	0.0134294	1	0.00300012	0.00495868
112	ACH-000364	U2OS_BONE	Bone	chr5	1293428	1294781	TERT	5_1294086_C_T	20	23			43		CCLE_WGS	0.465116		0.869565					0.0152882	0.00793388
113	ACH-000367	NCIH226_LUNG	Lung	chr5	1293428	1294781	TERT	5_1293670_T_C	9	18			27		CCLE_WGS	0.333333		0.5					-0.000575104
114	ACH-000368	SNU1105_CENTRAL_NERVOUS_SYSTEM	Central nervous system	chr5	1255402	1255526	TERT	5_1255520_G_A	21	19			40		CCLE_WES	0.525		1.10526					0.00300012	0.00495868
115	ACH-000375	G402_SOFT_TISSUE	Soft tissue	chr5	1293428	1294781	TERT	5_1294086_C_T	16	20	7	2	36	9	CCLE_WGS	0.444444	0.777778	0.8	3.5	4.375	3.72727	0	0.0152882	0.00793388
116	ACH-000376	SF295_CENTRAL_NERVOUS_SYSTEM	Central nervous system	chr5	1255402	1255526	TERT	5_1255520_G_A	26	27	19	0	53	19	CCLE_WGS	0.490566	1	0.962963	inf	inf	40.4717	1	0.00300012	0.00495868
117	ACH-000376	SF295_CENTRAL_NERVOUS_SYSTEM	Central nervous system	chr5	1255402	1255526	TERT	5_1255520_G_A	33	16	19	0	49	19	CCLE_WES	0.673469	1	2.0625	inf	inf	19.209	1	0.00300012	0.00495868
118	ACH-000376	SF295_CENTRAL_NERVOUS_SYSTEM	Central nervous system	chr5	1293428	1294781	TERT	5_1294086_C_T	24	22			46		CCLE_WGS	0.521739		1.09091					0.0152882	0.00793388
119	ACH-000377	SNU478_BILIARY_TRACT	Bile duct	chr5	1255402	1255526	TERT	5_1255520_G_A	55	28	12	2	83	14	CCLE_WES	0.662651	0.857143	1.96429	6	3.05455	2.56757	0	0.00300012	0.00495868
120	ACH-000382	CORL24_LUNG	Lung	chr5	1253282	1253946	TERT	5_1253744_G_A	17	20			37		CCLE_WGS	0.459459		0.85					-0.00562643
121	ACH-000382	CORL24_LUNG	Lung	chr5	1280273	1280453	TERT	5_1280306_G_A	66	55			121		CCLE_WES	0.545455		1.2					-0.000575104	-0.00115702
122	ACH-000382	CORL24_LUNG	Lung	chr5	1280273	1280453	TERT	5_1280306_G_A	30	30			60		CCLE_WGS	0.5		1					-0.000575104	-0.00115702
123	ACH-000387	TF1_HAEMATOPOIETIC_AND_LYMPHOID_TISSUE	Blood	chr5	1255402	1255526	TERT	5_1255520_G_A	17	33	0	53	50	53	CCLE_WES	0.34	0	0.515152	0	0	0.0178905	1	0.00300012	0.00495868
124	ACH-000388	NUDHL1_HAEMATOPOIETIC_AND_LYMPHOID_TISSUE	Lymphocyte	chr5	1255402	1255526	TERT	5_1255520_G_A	61	19	0	18	80	18	CCLE_WES	0.7625	0	3.21053	0	0	0.00856955	1	0.00300012	0.00495868
125	ACH-000392	CALU3_LUNG	Lung	chr5	1255402	1255526	TERT	5_1255520_G_A	20	31			51		CCLE_WES	0.392157		0.645161					0.00300012	0.00495868
126	ACH-000394	NCIH2081_LUNG	Lung	chr5	1293428	1294781	TERT	5_1294086_C_T	77	31			108		CCLE_WGS	0.712963		2.48387					0.0152882	0.00793388
127	ACH-000394	NCIH2081_LUNG	Lung	chr5	1255402	1255526	TERT	5_1255520_G_A	32	67			99		CCLE_WGS	0.323232		0.477612					0.00300012	0.00495868
128	ACH-000395	NCIH520_LUNG	Lung	chr5	1253282	1253946	TERT	5_1253744_G_A	12	30			42		CCLE_WGS	0.285714		0.4					-0.00562643
129	ACH-000400	SKCO1_LARGE_INTESTINE	Colorectal	chr5	1255402	1255526	TERT	5_1255520_G_A	32	22	4	5	54	9	CCLE_WGS	0.592593	0.444444	1.45455	0.8	0.55	0.566434	0	0.00300012	0.00495868
130	ACH-000400	SKCO1_LARGE_INTESTINE	Colorectal	chr5	1253282	1253946	TERT	5_1253744_G_A	21	37			58		CCLE_WGS	0.362069		0.567568					-0.00562643
131	ACH-000400	SKCO1_LARGE_INTESTINE	Colorectal	chr5	1255402	1255526	TERT	5_1255520_G_A	48	19	4	5	67	9	CCLE_WES	0.716418	0.444444	2.52632	0.8	0.316667	0.32896	0	0.00300012	0.00495868
132	ACH-000403	NCIH747_LARGE_INTESTINE	Colorectal	chr5	1293428	1294781	TERT	5_1294086_C_T	24	32			56		CCLE_WGS	0.428571		0.75					0.0152882	0.00793388
133	ACH-000407	SNU685_ENDOMETRIUM	Uterus	chr5	1255402	1255526	TERT	5_1255520_G_A	23	46	26	0	69	26	CCLE_WES	0.333333	1	0.5	inf	inf	104.872	1	0.00300012	0.00495868
134	ACH-000408	TE5_OESOPHAGUS	Esophagus	chr5	1255402	1255526	TERT	5_1255520_G_A	48	26			74		CCLE_WGS	0.648649		1.84615					0.00300012	0.00495868
135	ACH-000408	TE5_OESOPHAGUS	Esophagus	chr5	1293428	1294781	TERT	5_1294086_C_T	25	45			70		CCLE_WGS	0.357143		0.555556					0.0152882	0.00793388
136	ACH-000409	OVSAHO_OVARY	Ovary	chr5	1255402	1255526	TERT	5_1255520_G_A	24	21			45		CCLE_WES	0.533333		1.14286					0.00300012	0.00495868
137	ACH-000409	OVSAHO_OVARY	Ovary	chr5	1253282	1253946	TERT	5_1253591_G_A	34	28	5	4	62	9	CCLE_WGS	0.548387	0.555556	1.21429	1.25	1.02941	1.00966	0	-0.000575104
138	ACH-000409	OVSAHO_OVARY	Ovary	chr5	1255402	1255526	TERT	5_1255520_G_A	36	45			81		CCLE_WGS	0.444444		0.8					0.00300012	0.00495868
139	ACH-000415	BICR6_UPPER_AERODIGESTIVE_TRACT	Upper aerodigestive	chr5	1255402	1255526	TERT	5_1255520_G_A	24	29			53		CCLE_WES	0.45283		0.827586					0.00300012	0.00495868
140	ACH-000420	SNU449_LIVER	Liver	chr5	1255402	1255526	TERT	5_1255520_G_A	14	18	6	9	32	15	CCLE_WGS	0.4375	0.4	0.777778	0.666667	0.857143	0.872958	0	0.00300012	0.00495868
141	ACH-000422	SNU475_LIVER	Liver	chr5	1293428	1294781	TERT	5_1294086_C_T	13	33	0	10	46	10	CCLE_WGS	0.282609	0	0.393939	0	0	0.118166	1	0.0152882	0.00793388
142	ACH-000427	NCIN87_STOMACH	Gastric	chr5	1253282	1253946	TERT	5_1253780_G_A	20	22	0	18	42	18	CCLE_WGS	0.47619	0	0.909091	0	0	0.0296638	1	-0.00115021
143	ACH-000427	NCIN87_STOMACH	Gastric	chr5	1253282	1253946	TERT	5_1253690_G_A	25	17	0	14	42	14	CCLE_WGS	0.595238	0	1.47059	0	0	0.0236646	1	-0.000575104
144	ACH-000427	NCIN87_STOMACH	Gastric	chr5	1293428	1294781	TERT	5_1294086_C_T	21	24			45		CCLE_WGS	0.466667		0.875					0.0152882	0.00793388
145	ACH-000431	NCIH1694_LUNG	Lung	chr5	1271234	1271319	TERT	5_1271311_G_C	24	82			106		CCLE_WGS	0.226415		0.292683					-0.00115021
146	ACH-000444	LU99_LUNG	Lung	chr5	1293428	1294781	TERT	5_1294086_C_T	17	29	1	8	46	9	CCLE_WGS	0.369565	0.111111	0.586207	0.125	0.213235	0.297479	0	0.0152882	0.00793388
147	ACH-000447	NCIH2228_LUNG	Lung	chr5	1253282	1253946	TERT	5_1253744_G_A	45	11			56		CCLE_WGS	0.803571		4.09091					-0.00562643
148	ACH-000447	NCIH2228_LUNG	Lung	chr5	1293428	1294781	TERT	5_1294086_C_T	16	37			53		CCLE_WGS	0.301887		0.432432					0.0152882	0.00793388
149	ACH-000448	NCIH1666_LUNG	Lung	chr5	1253282	1253946	TERT	5_1253744_G_A	36	14			50		CCLE_WGS	0.72		2.57143					-0.00562643
150	ACH-000454	HCC95_LUNG	Lung	chr5	1253282	1253946	TERT	5_1253744_G_A	21	49			70		CCLE_WGS	0.3		0.428571					-0.00562643
151	ACH-000457	CAL54_KIDNEY	Kidney	chr5	1293428	1294781	TERT	5_1294086_C_T	9	30			39		CCLE_WGS	0.230769		0.3					0.0152882	0.00793388
152	ACH-000462	NALM1_HAEMATOPOIETIC_AND_LYMPHOID_TISSUE	Blood	chr5	1282544	1282739	TERT	5_1282654_G_A	37	36	99	0	73	99	CCLE_WES	0.506849	1	1.02778	inf	inf	193.693	1		-0.00115702
153	ACH-000463	NCIH460_LUNG	Lung	chr5	1253282	1253946	TERT	5_1253744_G_A	29	23	32	6	52	38	CCLE_WGS	0.557692	0.842105	1.26087	5.33333	4.22989	3.98305	0	-0.00562643
154	ACH-000468	PK45H_PANCREAS	Pancreas	chr5	1255402	1255526	TERT	5_1255520_G_A	69	70			139		CCLE_WES	0.496403		0.985714					0.00300012	0.00495868
155	ACH-000473	RT112_URINARY_TRACT	Urinary tract	chr5	1255402	1255526	TERT	5_1255520_G_A	15	24	26	0	39	26	CCLE_WGS	0.384615	1	0.625	inf	inf	83.7742	1	0.00300012	0.00495868
156	ACH-000475	HUH1_LIVER	Liver	chr5	1255402	1255526	TERT	5_1255520_G_A	27	32	60	0	59	60	CCLE_WES	0.457627	1	0.84375	inf	inf	143	1	0.00300012	0.00495868
157	ACH-000478	SNU387_LIVER	Liver	chr5	1279406	1279585	TERT	5_1279439_G_A	11	27			38		CCLE_WGS	0.289474		0.407407					0.00079556
158	ACH-000479	KNS81_CENTRAL_NERVOUS_SYSTEM	Central nervous system	chr5	1255402	1255526	TERT	5_1255520_G_A	16	19	9	0	35	9	CCLE_WGS	0.457143	1	0.842105	inf	inf	22.4545	1	0.00300012	0.00495868
159	ACH-000479	KNS81_CENTRAL_NERVOUS_SYSTEM	Central nervous system	chr5	1293428	1294781	TERT	5_1294086_C_T	17	17			34		CCLE_WGS	0.5		1					0.0152882	0.00793388
160	ACH-000481	NCIH2170_LUNG	Lung	chr5	1293428	1294781	TERT	5_1294086_C_T	33	22	8	1	55	9	CCLE_WGS	0.6	0.888889	1.5	8	5.33333	3.80597	0	0.0152882	0.00793388
161	ACH-000486	KU1919_URINARY_TRACT	Urinary tract	chr5	1293428	1294781	TERT	5_1294328_C_T	19	22	8	3	41	11	CCLE_WGS	0.463415	0.727273	0.863636	2.66667	3.08772	2.8022	0	-0.000575104
162	ACH-000486	KU1919_URINARY_TRACT	Urinary tract	chr5	1293428	1294781	TERT	5_1294086_C_T	24	21	5	5	45	10	CCLE_WGS	0.533333	0.5	1.14286	1	0.875	0.877551	0	0.0152882	0.00793388
163	ACH-000493	SNU423_LIVER	Liver	chr5	1293428	1294781	TERT	5_1294086_C_T	17	31			48		CCLE_WGS	0.354167		0.548387					0.0152882	0.00793388
164	ACH-000496	NCIH1792_LUNG	Lung	chr5	1253282	1253946	TERT	5_1253744_G_A	25	13	26	11	38	37	CCLE_WGS	0.657895	0.702703	1.92308	2.36364	1.22909	1.21995	0	-0.00562643
165	ACH-000500	SNU46_UPPER_AERODIGESTIVE_TRACT	Upper aerodigestive	chr5	1255402	1255526	TERT	5_1255520_G_A	20	37	10	2	57	12	CCLE_WES	0.350877	0.833333	0.540541	5	9.25	7.68293	1	0.00300012	0.00495868
166	ACH-000502	TCCPAN2_PANCREAS	Pancreas	chr5	1255402	1255526	TERT	5_1255520_G_A	23	14			37		CCLE_WES	0.621622		1.64286					0.00300012	0.00495868
167	ACH-000503	BICR16_UPPER_AERODIGESTIVE_TRACT	Upper aerodigestive	chr5	1253282	1253946	TERT	5_1253918_C_T	19	9			28		CCLE_WES	0.678571		2.11111					-0.00207996	0
168	ACH-000503	BICR16_UPPER_AERODIGESTIVE_TRACT	Upper aerodigestive	chr5	1255402	1255526	TERT	5_1255520_G_A	32	38			70		CCLE_WES	0.457143		0.842105					0.00300012	0.00495868
169	ACH-000505	RKN_SOFT_TISSUE	Soft tissue	chr5	1293428	1294781	TERT	5_1294086_C_T	34	31			65		CCLE_WGS	0.523077		1.09677					0.0152882	0.00793388
170	ACH-000506	NCIH146_LUNG	Lung	chr5	1253282	1253946	TERT	5_1253918_C_T	11	47	2	24	58	26	CCLE_WGS	0.189655	0.0769231	0.234043	0.0833333	0.356061	0.421473	0	-0.00207996	0
171	ACH-000507	KE39_STOMACH	Gastric	chr5	1255402	1255526	TERT	5_1255520_G_A	23	37	0	15	60	15	CCLE_WGS	0.383333	0	0.621622	0	0	0.0514756	1	0.00300012	0.00495868
172	ACH-000507	KE39_STOMACH	Gastric	chr5	1255402	1255526	TERT	5_1255520_G_A	23	38	0	15	61	15	CCLE_WES	0.377049	0	0.605263	0	0	0.0528483	1	0.00300012	0.00495868
173	ACH-000511	CALU1_LUNG	Lung	chr5	1253282	1253946	TERT	5_1253744_G_A	58	9			67		CCLE_WGS	0.865672		6.44444					-0.00562643
174	ACH-000511	CALU1_LUNG	Lung	chr5	1272300	1272395	TERT	5_1272311_C_T	73	18			91		CCLE_WGS	0.802198		4.05556					0.00252087
175	ACH-000514	NCIH1092_LUNG	Lung	chr5	1293428	1294781	TERT	5_1293893_G_A	31	11			42		CCLE_WGS	0.738095		2.81818					-0.000575104
176	ACH-000514	NCIH1092_LUNG	Lung	chr5	1293428	1294781	TERT	5_1294086_C_T	37	15			52		CCLE_WGS	0.711538		2.46667					0.0152882	0.00793388
177	ACH-000515	HCC33_LUNG	Lung	chr5	1253282	1253946	TERT	5_1253744_G_A	26	9	24	13	35	37	CCLE_WGS	0.742857	0.648649	2.88889	1.84615	0.639053	0.650594	0	-0.00562643
178	ACH-000517	SNU410_PANCREAS	Pancreas	chr5	1255402	1255526	TERT	5_1255520_G_A	10	20			30		CCLE_WES	0.333333		0.5					0.00300012	0.00495868
179	ACH-000519	PEER_HAEMATOPOIETIC_AND_LYMPHOID_TISSUE	Blood	chr5	1255402	1255526	TERT	5_1255520_G_A	18	18	69	94	36	163	CCLE_WES	0.5	0.423313	1	0.734043	0.734043	0.73545	0	0.00300012	0.00495868
180	ACH-000521	NCIH2030_LUNG	Lung	chr5	1253282	1253946	TERT	5_1253744_G_A	30	20	14	5	50	19	CCLE_WGS	0.6	0.736842	1.5	2.8	1.86667	1.77198	0	-0.00562643
181	ACH-000523	NCIH1184_LUNG	Lung	chr5	1293428	1294781	TERT	5_1294086_C_T	35	22			57		CCLE_WGS	0.614035		1.59091					0.0152882	0.00793388
182	ACH-000525	NCIH2171_LUNG	Lung	chr5	1279406	1279585	TERT	5_1279535_G_A	12	51			63		CCLE_WGS	0.190476		0.235294					-0.000575104
183	ACH-000525	NCIH2171_LUNG	Lung	chr5	1253282	1253946	TERT	5_1253744_G_A	29	43	3	8	72	11	CCLE_WGS	0.402778	0.272727	0.674419	0.375	0.556034	0.607178	0	-0.00562643
184	ACH-000525	NCIH2171_LUNG	Lung	chr5	1255402	1255526	TERT	5_1255520_G_A	40	26	12	4	66	16	CCLE_WGS	0.606061	0.75	1.53846	3	1.95	1.81756	0	0.00300012	0.00495868
185	ACH-000528	ABC1_LUNG	Lung	chr5	1253282	1253946	TERT	5_1253592_C_T	71	51			122		CCLE_WGS	0.581967		1.39216					0.00194577
186	ACH-000528	ABC1_LUNG	Lung	chr5	1255402	1255526	TERT	5_1255520_G_A	84	44	10	0	128	10	CCLE_WGS	0.65625	1	1.90909	inf	inf	11.0592	1	0.00300012	0.00495868
187	ACH-000528	ABC1_LUNG	Lung	chr5	1293428	1294781	TERT	5_1294086_C_T	32	57			89		CCLE_WGS	0.359551		0.561404					0.0152882	0.00793388
188	ACH-000530	DMS114_LUNG	Lung	chr5	1253282	1253946	TERT	5_1253744_G_A	24	11	49	26	35	75	CCLE_WGS	0.685714	0.653333	2.18182	1.88462	0.863782	0.876781	0	-0.00562643
189	ACH-000530	DMS114_LUNG	Lung	chr5	1293428	1294781	TERT	5_1293767_G_A	28	26	24	6	54	30	CCLE_WGS	0.518519	0.8	1.07692	4	3.71429	3.50472	0	-0.00115021
190	ACH-000532	SNU61_LARGE_INTESTINE	Colorectal	chr5	1255402	1255526	TERT	5_1255520_G_A	30	13	13	0	43	13	CCLE_WES	0.697674	1	2.30769	inf	inf	11.9508	1	0.00300012	0.00495868
191	ACH-000534	WSUDLCL2_HAEMATOPOIETIC_AND_LYMPHOID_TISSUE	Lymphocyte	chr5	1255402	1255526	TERT	5_1255520_G_A	30	10			40		CCLE_WES	0.75		3					0.00300012	0.00495868
192	ACH-000536	BT20_BREAST	Breast	chr5	1255402	1255526	TERT	5_1255520_G_A	83	46			129		CCLE_WGS	0.643411		1.80435					0.00300012	0.00495868
193	ACH-000538	HUTU80_SMALL_INTESTINE	Gastric	chr5	1293428	1294781	TERT	5_1294086_C_T	21	26	29	17	47	46	CCLE_WGS	0.446809	0.630435	0.807692	1.70588	2.11204	2.07774	0	0.0152882	0.00793388
194	ACH-000538	HUTU80_SMALL_INTESTINE	Gastric	chr5	1253282	1253946	TERT	5_1253744_G_A	18	13	41	39	31	80	CCLE_WGS	0.580645	0.5125	1.38462	1.05128	0.759259	0.766678	0	-0.00562643
195	ACH-000543	SNU489_CENTRAL_NERVOUS_SYSTEM	Central nervous system	chr5	1255402	1255526	TERT	5_1255520_G_A	25	27	9	0	52	9	CCLE_WES	0.480769	1	0.925926	inf	inf	20.4902	1	0.00300012	0.00495868
196	ACH-000546	HSC4_UPPER_AERODIGESTIVE_TRACT	Upper aerodigestive	chr5	1255402	1255526	TERT	5_1255520_G_A	19	19	1	15	38	16	CCLE_WES	0.5	0.0625	1	0.0666667	0.0666667	0.0967742	1	0.00300012	0.00495868
197	ACH-000550	IGR39_SKIN	Skin	chr5	1293428	1294781	TERT	5_1294086_C_T	29	34			63		CCLE_WGS	0.460317		0.852941					0.0152882	0.00793388
198	ACH-000552	HT29_LARGE_INTESTINE	Colorectal	chr5	1279406	1279585	TERT	5_1279439_G_A	34	50			84		CCLE_WGS	0.404762		0.68					0.00079556
199	ACH-000553	SQ1_LUNG	Lung	chr5	1255402	1255526	TERT	5_1255520_G_A	29	20			49		CCLE_WES	0.591837		1.45					0.00300012	0.00495868
200	ACH-000557	AML193_HAEMATOPOIETIC_AND_LYMPHOID_TISSUE	Blood	chr5	1255402	1255526	TERT	5_1255520_G_A	30	19			49		CCLE_WES	0.612245		1.57895					0.00300012	0.00495868
201	ACH-000559	NCIH1836_LUNG	Lung	chr5	1254483	1254620	TERT	5_1254594_C_T	44	15	24	6	59	30	CCLE_WES	0.745763	0.8	2.93333	4	1.36364	1.31288	0	-0.00323017	-0.00231405
202	ACH-000559	NCIH1836_LUNG	Lung	chr5	1254483	1254620	TERT	5_1254594_C_T	47	33	24	6	80	30	CCLE_WGS	0.5875	0.8	1.42424	4	2.80851	2.6583	0	-0.00323017	-0.00231405
203	ACH-000559	NCIH1836_LUNG	Lung	chr5	1253282	1253946	TERT	5_1253744_G_A	17	23	28	6	40	34	CCLE_WGS	0.425	0.823529	0.73913	4.66667	6.31373	5.88791	1	-0.00562643
204	ACH-000572	G361_SKIN	Skin	chr5	1293428	1294781	TERT	5_1294086_C_T	32	30			62		CCLE_WGS	0.516129		1.06667					0.0152882	0.00793388
205	ACH-000574	FUOV1_OVARY	Ovary	chr5	1255402	1255526	TERT	5_1255520_G_A	35	24			59		CCLE_WGS	0.59322		1.45833					0.00300012	0.00495868
206	ACH-000576	KMS27_HAEMATOPOIETIC_AND_LYMPHOID_TISSUE	Plasma cell	chr5	1255402	1255526	TERT	5_1255520_G_A	17	26	0	62	43	62	CCLE_WES	0.395349	0	0.653846	0	0	0.0121143	1	0.00300012	0.00495868
207	ACH-000579	UACC257_SKIN	Skin	chr5	1253282	1253946	TERT	5_1253744_G_A	15	21	0	28	36	28	CCLE_WGS	0.416667	0	0.714286	0	0	0.024335	1	-0.00562643
208	ACH-000582	COLO741_SKIN	Skin	chr5	1293428	1294781	TERT	5_1294086_C_T	22	28			50		CCLE_WGS	0.44		0.785714					0.0152882	0.00793388
209	ACH-000582	COLO741_SKIN	Skin	chr5	1255402	1255526	TERT	5_1255520_G_A	37	30			67		CCLE_WGS	0.552239		1.23333					0.00300012	0.00495868
210	ACH-000586	NCIH1876_LUNG	Lung	chr5	1253282	1253946	TERT	5_1253744_G_A	17	33			50		CCLE_WGS	0.34		0.515152					-0.00562643
211	ACH-000590	NCIH2073_LUNG	Lung	chr5	1255402	1255526	TERT	5_1255520_G_A	75	10	18	2	85	20	CCLE_WES	0.882353	0.9	7.5	9	1.2	1.02914	0	0.00300012	0.00495868
212	ACH-000595	LN229_CENTRAL_NERVOUS_SYSTEM	Central nervous system	chr5	1293428	1294781	TERT	5_1294166_C_T	21	16			37		CCLE_WGS	0.567568		1.3125					0.00216622
213	ACH-000595	LN229_CENTRAL_NERVOUS_SYSTEM	Central nervous system	chr5	1293428	1294781	TERT	5_1294086_C_T	12	36			48		CCLE_WGS	0.25		0.333333					0.0152882	0.00793388
214	ACH-000598	KMS21BM_HAEMATOPOIETIC_AND_LYMPHOID_TISSUE	Plasma cell	chr5	1255402	1255526	TERT	5_1255520_G_A	25	21	216	173	46	389	CCLE_WES	0.543478	0.55527	1.19048	1.24855	1.04879	1.0521	0	0.00300012	0.00495868
215	ACH-000601	MIAPACA2_PANCREAS	Pancreas	chr5	1255402	1255526	TERT	5_1255520_G_A	27	12	15	0	39	15	CCLE_WGS	0.692308	1	2.25	inf	inf	14.0909	1	0.00300012	0.00495868
216	ACH-000601	MIAPACA2_PANCREAS	Pancreas	chr5	1293428	1294781	TERT	5_1294086_C_T	9	32			41		CCLE_WGS	0.219512		0.28125					0.0152882	0.00793388
217	ACH-000604	KYO1_HAEMATOPOIETIC_AND_LYMPHOID_TISSUE	Blood	chr5	1255402	1255526	TERT	5_1255520_G_A	18	21	0	14	39	14	CCLE_WES	0.461538	0	0.857143	0	0	0.0400746	1	0.00300012	0.00495868
218	ACH-000607	KYM1_SOFT_TISSUE	Soft tissue	chr5	1255402	1255526	TERT	5_1255520_G_A	19	19			38		CCLE_WGS	0.5		1					0.00300012	0.00495868
219	ACH-000608	COV644_OVARY	Ovary	chr5	1253282	1253946	TERT	5_1253918_C_T	10	51			61		CCLE_WGS	0.163934		0.196078					-0.00207996	0
220	ACH-000610	NCIH2227_LUNG	Lung	chr5	1253282	1253946	TERT	5_1253744_G_A	29	22			51		CCLE_WGS	0.568627		1.31818					-0.00562643
221	ACH-000614	RVH421_SKIN	Skin	chr5	1253282	1253946	TERT	5_1253744_G_A	12	22			34		CCLE_WGS	0.352941		0.545455					-0.00562643
222	ACH-000614	RVH421_SKIN	Skin	chr5	1293428	1294781	TERT	5_1294086_C_T	20	14			34		CCLE_WGS	0.588235		1.42857					0.0152882	0.00793388
223	ACH-000628	NCIH596_LUNG	Lung	chr5	1293428	1294781	TERT	5_1294086_C_T	31	42			73		CCLE_WGS	0.424658		0.738095					0.0152882	0.00793388
224	ACH-000632	HS944T_SKIN	Skin	chr5	1293428	1294781	TERT	5_1294086_C_T	10	23			33		CCLE_WGS	0.30303		0.434783					0.0152882	0.00793388
225	ACH-000633	FU97_STOMACH	Gastric	chr5	1279406	1279585	TERT	5_1279439_G_A	14	100	5	26	114	31	CCLE_WGS	0.122807	0.16129	0.14	0.192308	1.37363	1.43852	0	0.00079556
226	ACH-000635	SNU119_OVARY	Ovary	chr5	1255402	1255526	TERT	5_1255520_G_A	48	51			99		CCLE_WGS	0.484848		0.941176					0.00300012	0.00495868
227	ACH-000636	RPMI8402_HAEMATOPOIETIC_AND_LYMPHOID_TISSUE	Blood	chr5	1280273	1280453	TERT	5_1280411_T_C	35	29	1	53	64	54	CCLE_WES	0.546875	0.0185185	1.2069	0.0188679	0.0156334	0.0232987	1		-0.00115702
228	ACH-000637	KYSE520_OESOPHAGUS	Esophagus	chr5	1293428	1294781	TERT	5_1294086_C_T	31	10			41		CCLE_WGS	0.756098		3.1					0.0152882	0.00793388
229	ACH-000637	KYSE520_OESOPHAGUS	Esophagus	chr5	1255402	1255526	TERT	5_1255520_G_A	10	49			59		CCLE_WGS	0.169492		0.204082					0.00300012	0.00495868
230	ACH-000643	HDQP1_BREAST	Breast	chr5	1253282	1253946	TERT	5_1253744_G_A	19	61			80		CCLE_WGS	0.2375		0.311475					-0.00562643
231	ACH-000643	HDQP1_BREAST	Breast	chr5	1278756	1278911	TERT	5_1278806_C_T	56	23			79		CCLE_WGS	0.708861		2.43478					-0.000575104
232	ACH-000643	HDQP1_BREAST	Breast	chr5	1293428	1294781	TERT	5_1293443_G_C	63	12			75		CCLE_WGS	0.84		5.25					-0.000575104
233	ACH-000649	786O_KIDNEY	Kidney	chr5	1293428	1294781	TERT	5_1294086_C_T	15	48			63		CCLE_WGS	0.238095		0.3125					0.0152882	0.00793388
234	ACH-000657	A2780_OVARY	Ovary	chr5	1253282	1253946	TERT	5_1253780_G_A	22	22	20	18	44	38	CCLE_WGS	0.5	0.526316	1	1.11111	1.11111	1.10811	0	-0.00115021
235	ACH-000660	SUDHL5_HAEMATOPOIETIC_AND_LYMPHOID_TISSUE	Lymphocyte	chr5	1255402	1255526	TERT	5_1255520_G_A	18	12			30		CCLE_WES	0.6		1.5					0.00300012	0.00495868
236	ACH-000663	OVTOKO_OVARY	Ovary	chr5	1255402	1255526	TERT	5_1255520_G_A	29	10			39		CCLE_WES	0.74359		2.9					0.00300012	0.00495868
237	ACH-000666	NCIH1355_LUNG	Lung	chr5	1255402	1255526	TERT	5_1255520_G_A	17	31	35	20	48	55	CCLE_WGS	0.354167	0.636364	0.548387	1.75	3.19118	3.11707	0	0.00300012	0.00495868
238	ACH-000667	HCC44_LUNG	Lung	chr5	1253282	1253946	TERT	5_1253744_G_A	63	90	0	33	153	33	CCLE_WGS	0.411765	0	0.7	0	0	0.0212716	1	-0.00562643
239	ACH-000667	HCC44_LUNG	Lung	chr5	1254483	1254620	TERT	5_1254594_C_T	67	94	2	38	161	40	CCLE_WGS	0.416149	0.05	0.712766	0.0526316	0.0738413	0.0909091	1	-0.00323017	-0.00231405
240	ACH-000668	HCC70_BREAST	Breast	chr5	1293428	1294781	TERT	5_1294086_C_T	125	17			142		CCLE_WGS	0.880282		7.35294					0.0152882	0.00793388
241	ACH-000668	HCC70_BREAST	Breast	chr5	1253282	1253946	TERT	5_1253744_G_A	13	109	0	25	122	25	CCLE_WGS	0.106557	0	0.119266	0	0	0.159041	1	-0.00562643
242	ACH-000668	HCC70_BREAST	Breast	chr5	1293428	1294781	TERT	5_1294032_C_T	131	20			151		CCLE_WGS	0.86755		6.55					-0.000575104
243	ACH-000677	SW1573_LUNG	Lung	chr5	1255402	1255526	TERT	5_1255520_G_A	15	33			48		CCLE_WES	0.3125		0.454545					0.00300012	0.00495868
244	ACH-000678	MKN7_STOMACH	Gastric	chr5	1293428	1294781	TERT	5_1294086_C_T	32	49			81		CCLE_WGS	0.395062		0.653061					0.0152882	0.00793388
245	ACH-000680	SW948_LARGE_INTESTINE	Colorectal	chr5	1253282	1253946	TERT	5_1253744_G_A	10	24			34		CCLE_WGS	0.294118		0.416667					-0.00562643
246	ACH-000681	A549_LUNG	Lung	chr5	1254483	1254620	TERT	5_1254594_C_T	37	22	9	8	59	17	CCLE_WGS	0.627119	0.529412	1.68182	1.125	0.668919	0.670588	0	-0.00323017	-0.00231405
247	ACH-000681	A549_LUNG	Lung	chr5	1253282	1253946	TERT	5_1253744_G_A	48	21	10	7	69	17	CCLE_WGS	0.695652	0.588235	2.28571	1.42857	0.625	0.620619	0	-0.00562643
248	ACH-000681	A549_LUNG	Lung	chr5	1293428	1294781	TERT	5_1294086_C_T	24	65			89		CCLE_WGS	0.269663		0.369231					0.0152882	0.00793388
249	ACH-000682	SNU1066_UPPER_AERODIGESTIVE_TRACT	Upper aerodigestive	chr5	1293428	1294781	TERT	5_1294086_C_T	11	19	0	15	30	15	CCLE_WES	0.366667	0	0.578947	0	0	0.0546985	1	0.0152882	0.00793388
250	ACH-000688	OV7_OVARY	Ovary	chr5	1255402	1255526	TERT	5_1255520_G_A	28	30			58		CCLE_WGS	0.482759		0.933333					0.00300012	0.00495868
251	ACH-000688	OV7_OVARY	Ovary	chr5	1293428	1294781	TERT	5_1294086_C_T	18	36			54		CCLE_WGS	0.333333		0.5					0.0152882	0.00793388
252	ACH-000691	HCC2157_BREAST	Breast	chr5	1253282	1253946	TERT	5_1253744_G_A	16	33			49		CCLE_WGS	0.326531		0.484848					-0.00562643
253	ACH-000698	DMS53_LUNG	Lung	chr5	1293428	1294781	TERT	5_1294665_G_C	26	18	27	3	44	30	CCLE_WGS	0.590909	0.9	1.44444	9	6.23077	5.48518	1	-0.000575104
254	ACH-000701	RMUGS_OVARY	Ovary	chr5	1255402	1255526	TERT	5_1255520_G_A	24	18	29	0	42	29	CCLE_WES	0.571429	1	1.33333	inf	inf	44.551	1	0.00300012	0.00495868
255	ACH-000703	DMS79_LUNG	Lung	chr5	1293428	1294781	TERT	5_1294086_C_T	11	20			31		CCLE_WGS	0.354839		0.55					0.0152882	0.00793388
256	ACH-000705	LC1F_LUNG	Lung	chr5	1255402	1255526	TERT	5_1255520_G_A	39	22	9	2	61	11	CCLE_WGS	0.639344	0.818182	1.77273	4.5	2.53846	2.16456	0	0.00300012	0.00495868
257	ACH-000705	LC1F_LUNG	Lung	chr5	1293428	1294781	TERT	5_1294086_C_T	34	9			43		CCLE_WGS	0.790698		3.77778					0.0152882	0.00793388
258	ACH-000714	KMS11_HAEMATOPOIETIC_AND_LYMPHOID_TISSUE	Plasma cell	chr5	1293428	1294781	TERT	5_1294086_C_T	15	26	11	0	41	11	CCLE_WGS	0.365854	1	0.576923	inf	inf	39.3226	1	0.0152882	0.00793388
259	ACH-000715	SNU1214_UPPER_AERODIGESTIVE_TRACT	Upper aerodigestive	chr5	1264519	1264707	TERT	5_1264587_G_A	22	12			34		CCLE_WES	0.647059		1.83333						0
260	ACH-000719	RMGI_OVARY	Ovary	chr5	1253282	1253946	TERT	5_1253592_C_T	19	16			35		CCLE_WGS	0.542857		1.1875					0.00194577
261	ACH-000719	RMGI_OVARY	Ovary	chr5	1255402	1255526	TERT	5_1255520_G_A	21	17	9	0	38	9	CCLE_WGS	0.552632	1	1.23529	inf	inf	15.4651	1	0.00300012	0.00495868
262	ACH-000723	YD10B_UPPER_AERODIGESTIVE_TRACT	Upper aerodigestive	chr5	1268635	1268748	TERT	5_1268697_C_T	38	11			49		CCLE_WES	0.77551		3.45455						0
263	ACH-000723	YD10B_UPPER_AERODIGESTIVE_TRACT	Upper aerodigestive	chr5	1255402	1255526	TERT	5_1255520_G_A	29	14			43		CCLE_WES	0.674419		2.07143					0.00300012	0.00495868
264	ACH-000724	HT1376_URINARY_TRACT	Urinary tract	chr5	1293428	1294781	TERT	5_1294086_C_T	35	14	0	17	49	17	CCLE_WGS	0.714286	0	2.5	0	0	0.01167	1	0.0152882	0.00793388
265	ACH-000725	HCC202_BREAST	Breast	chr5	1253282	1253946	TERT	5_1253744_G_A	23	17	8	1	40	9	CCLE_WGS	0.575	0.888889	1.35294	8	5.91304	4.21986	0	-0.00562643
266	ACH-000726	TE14_OESOPHAGUS	Esophagus	chr5	1255402	1255526	TERT	5_1255520_G_A	36	47			83		CCLE_WES	0.433735		0.765957					0.00300012	0.00495868
267	ACH-000726	TE14_OESOPHAGUS	Esophagus	chr5	1268635	1268748	TERT	5_1268697_C_T	37	48			85		CCLE_WES	0.435294		0.770833						0
268	ACH-000727	NCIH2066_LUNG	Lung	chr5	1253282	1253946	TERT	5_1253744_G_A	23	74	2	6	97	8	CCLE_WGS	0.237113	0.25	0.310811	0.333333	1.07246	1.21931	0	-0.00562643
269	ACH-000727	NCIH2066_LUNG	Lung	chr5	1255402	1255526	TERT	5_1255520_G_A	70	34	20	3	104	23	CCLE_WGS	0.673077	0.869565	2.05882	6.66667	3.2381	2.86626	0	0.00300012	0.00495868
270	ACH-000728	KASUMI2_HAEMATOPOIETIC_AND_LYMPHOID_TISSUE	Blood	chr5	1255402	1255526	TERT	5_1255520_G_A	18	13	85	82	31	167	CCLE_WES	0.580645	0.508982	1.38462	1.03659	0.748645	0.756265	0	0.00300012	0.00495868
271	ACH-000729	NCIH1963_LUNG	Lung	chr5	1253282	1253946	TERT	5_1253744_G_A	23	16	17	3	39	20	CCLE_WGS	0.589744	0.85	1.4375	5.66667	3.94203	3.51064	0	-0.00562643
272	ACH-000730	SKMEL5_SKIN	Skin	chr5	1293428	1294781	TERT	5_1294166_C_T	21	17			38		CCLE_WGS	0.552632		1.23529					0.00216622
273	ACH-000734	JHH5_LIVER	Liver	chr5	1255402	1255526	TERT	5_1255520_G_A	46	14	105	1	60	106	CCLE_WES	0.766667	0.990566	3.28571	105	31.9565	21.9319	1	0.00300012	0.00495868
274	ACH-000735	PECAPJ49_UPPER_AERODIGESTIVE_TRACT	Upper aerodigestive	chr5	1255402	1255526	TERT	5_1255520_G_A	60	15	11	0	75	11	CCLE_WES	0.8	1	4	inf	inf	5.89256	1	0.00300012	0.00495868
275	ACH-000736	SNU601_STOMACH	Gastric	chr5	1255402	1255526	TERT	5_1255520_G_A	37	36	1	7	73	8	CCLE_WES	0.506849	0.125	1.02778	0.142857	0.138996	0.194667	1	0.00300012	0.00495868
276	ACH-000738	GB1_CENTRAL_NERVOUS_SYSTEM	Central nervous system	chr5	1255402	1255526	TERT	5_1255520_G_A	14	38	0	10	52	10	CCLE_WGS	0.269231	0	0.368421	0	0	0.126437	1	0.00300012	0.00495868
277	ACH-000739	HEPG2_LIVER	Liver	chr5	1293428	1294781	TERT	5_1294086_C_T	19	19	10	0	38	10	CCLE_WGS	0.5	1	1	inf	inf	21	1	0.0152882	0.00793388
278	ACH-000746	GSS_STOMACH	Gastric	chr5	1255402	1255526	TERT	5_1255520_G_A	42	33	53	0	75	53	CCLE_WES	0.56	1	1.27273	inf	inf	84.3412	1	0.00300012	0.00495868
279	ACH-000746	GSS_STOMACH	Gastric	chr5	1268635	1268748	TERT	5_1268715_G_A	44	40	39	0	84	39	CCLE_WES	0.52381	1	1.1	inf	inf	71.8989	1		-0.00115702
280	ACH-000747	NCIH1703_LUNG	Lung	chr5	1293428	1294781	TERT	5_1294086_C_T	23	44	21	10	67	31	CCLE_WGS	0.343284	0.677419	0.522727	2.1	4.01739	3.87741	0	0.0152882	0.00793388
281	ACH-000749	DMS273_LUNG	Lung	chr5	1253282	1253946	TERT	5_1253918_C_T	34	18			52		CCLE_WGS	0.653846		1.88889					-0.00207996	0
282	ACH-000749	DMS273_LUNG	Lung	chr5	1293428	1294781	TERT	5_1293849_C_A	26	22			48		CCLE_WGS	0.541667		1.18182					-0.000575104
283	ACH-000750	LOXIMVI_SKIN	Skin	chr5	1253282	1253946	TERT	5_1253744_G_A	15	21	0	44	36	44	CCLE_WGS	0.416667	0	0.714286	0	0	0.0155854	1	-0.00562643
284	ACH-000750	LOXIMVI_SKIN	Skin	chr5	1293428	1294781	TERT	5_1294086_C_T	11	10	19	0	21	19	CCLE_WGS	0.52381	1	1.1	inf	inf	35.6087	1	0.0152882	0.00793388
285	ACH-000752	NCIH196_LUNG	Lung	chr5	1293428	1294781	TERT	5_1294086_C_T	77	54	13	0	131	13	CCLE_WGS	0.587786	1	1.42593	inf	inf	18.9871	1	0.0152882	0.00793388
286	ACH-000759	MDAMB175VII_BREAST	Breast	chr5	1293428	1294781	TERT	5_1294086_C_T	12	19			31		CCLE_WGS	0.387097		0.631579					0.0152882	0.00793388
287	ACH-000759	MDAMB175VII_BREAST	Breast	chr5	1253282	1253946	TERT	5_1253744_G_A	20	21			41		CCLE_WGS	0.487805		0.952381					-0.00562643
288	ACH-000761	NUGC2_STOMACH	Gastric	chr5	1255402	1255526	TERT	5_1255520_G_A	26	62			88		CCLE_WES	0.295455		0.419355					0.00300012	0.00495868
289	ACH-000763	MM1S_HAEMATOPOIETIC_AND_LYMPHOID_TISSUE	Plasma cell	chr5	1253282	1253946	TERT	5_1253744_G_A	12	29	37	2	41	39	CCLE_WGS	0.292683	0.948718	0.413793	18.5	44.7083	35.4	1	-0.00562643
290	ACH-000763	MM1S_HAEMATOPOIETIC_AND_LYMPHOID_TISSUE	Plasma cell	chr5	1253282	1253946	TERT	5_1253681_C_T	29	19	3	41	48	44	CCLE_WGS	0.604167	0.0681818	1.52632	0.0731707	0.0479394	0.0557484	1	-0.000575104
291	ACH-000763	MM1S_HAEMATOPOIETIC_AND_LYMPHOID_TISSUE	Plasma cell	chr5	1293428	1294781	TERT	5_1294467_G_A	16	16	0	21	32	21	CCLE_WGS	0.5	0	1	0	0	0.0232558	1	-0.000575104
292	ACH-000765	WM983B_SKIN	Skin	chr5	1255402	1255526	TERT	5_1255520_G_A	14	27	0	9	41	9	CCLE_WES	0.341463	0	0.518519	0	0	0.0998185	1	0.00300012	0.00495868
293	ACH-000767	NCIH526_LUNG	Lung	chr5	1255402	1255526	TERT	5_1255520_G_A	24	20			44		CCLE_WGS	0.545455		1.2					0.00300012	0.00495868
294	ACH-000767	NCIH526_LUNG	Lung	chr5	1293428	1294781	TERT	5_1293783_C_G	29	15			44		CCLE_WGS	0.659091		1.93333					-0.000575104
295	ACH-000768	MDAMB231_BREAST	Breast	chr5	1253282	1253946	TERT	5_1253744_G_A	18	21			39		CCLE_WGS	0.461538		0.857143					-0.00562643
296	ACH-000771	BICR56_UPPER_AERODIGESTIVE_TRACT	Upper aerodigestive	chr5	1255402	1255526	TERT	5_1255520_G_A	15	17			32		CCLE_WES	0.46875		0.882353					0.00300012	0.00495868
297	ACH-000776	ONS76_CENTRAL_NERVOUS_SYSTEM	Central nervous system	chr5	1255402	1255526	TERT	5_1255520_G_A	38	40	1	34	78	35	CCLE_WGS	0.487179	0.0285714	0.95	0.0294118	0.0309598	0.0457369	1	0.00300012	0.00495868
298	ACH-000776	ONS76_CENTRAL_NERVOUS_SYSTEM	Central nervous system	chr5	1293428	1294781	TERT	5_1294086_C_T	18	19	20	0	37	20	CCLE_WGS	0.486486	1	0.947368	inf	inf	43.2162	1	0.0152882	0.00793388
299	ACH-000778	HSC3_UPPER_AERODIGESTIVE_TRACT	Upper aerodigestive	chr5	1293428	1294781	TERT	5_1294086_C_T	22	32	9	0	54	9	CCLE_WGS	0.407407	1	0.6875	inf	inf	27.4444	1	0.0152882	0.00793388
300	ACH-000778	HSC3_UPPER_AERODIGESTIVE_TRACT	Upper aerodigestive	chr5	1255402	1255526	TERT	5_1255520_G_A	37	37	0	43	74	43	CCLE_WGS	0.5	0	1	0	0	0.0114943	1	0.00300012	0.00495868
301	ACH-000780	NCIH1105_LUNG	Lung	chr5	1293428	1294781	TERT	5_1294086_C_T	24	32			56		CCLE_WGS	0.428571		0.75					0.0152882	0.00793388
302	ACH-000783	CAMA1_BREAST	Breast	chr5	1254483	1254620	TERT	5_1254594_C_T	22	22			44		CCLE_WGS	0.5		1					-0.00323017	-0.00231405
303	ACH-000784	KYSE70_OESOPHAGUS	Esophagus	chr5	1293428	1294781	TERT	5_1294086_C_T	31	12			43		CCLE_WGS	0.72093		2.58333					0.0152882	0.00793388
304	ACH-000788	A2058_SKIN	Skin	chr5	1253282	1253946	TERT	5_1253744_G_A	11	27	0	94	38	94	CCLE_WGS	0.289474	0	0.407407	0	0	0.0126524	1	-0.00562643
305	ACH-000788	A2058_SKIN	Skin	chr5	1253282	1253946	TERT	5_1253918_C_T	22	18	119	2	40	121	CCLE_WGS	0.55	0.983471	1.22222	59.5	48.6818	39.3022	1	-0.00207996	0
306	ACH-000790	SHP77_LUNG	Lung	chr5	1255402	1255526	TERT	5_1255520_G_A	61	39	16	29	100	45	CCLE_WGS	0.61	0.355556	1.5641	0.551724	0.352742	0.359239	0	0.00300012	0.00495868
307	ACH-000790	SHP77_LUNG	Lung	chr5	1293428	1294781	TERT	5_1294086_C_T	55	27	1	20	82	21	CCLE_WGS	0.670732	0.047619	2.03704	0.05	0.0245455	0.0362558	1	0.0152882	0.00793388
308	ACH-000790	SHP77_LUNG	Lung	chr5	1253282	1253946	TERT	5_1253744_G_A	21	66	20	13	87	33	CCLE_WGS	0.241379	0.606061	0.318182	1.53846	4.83516	4.69681	0	-0.00562643
309	ACH-000792	BFTC909_KIDNEY	Kidney	chr5	1293428	1294781	TERT	5_1294086_C_T	14	26			40		CCLE_WGS	0.35		0.538462					0.0152882	0.00793388
310	ACH-000796	MCAS_OVARY	Ovary	chr5	1255402	1255526	TERT	5_1255520_G_A	44	36	0	15	80	15	CCLE_WES	0.55	0	1.22222	0	0	0.0264589	1	0.00300012	0.00495868
311	ACH-000798	CL40_LARGE_INTESTINE	Colorectal	chr5	1255402	1255526	TERT	5_1255520_G_A	18	15			33		CCLE_WES	0.545455		1.2					0.00300012	0.00495868
312	ACH-000801	HS936T_SKIN	Skin	chr5	1255402	1255526	TERT	5_1255520_G_A	40	18			58		CCLE_WES	0.689655		2.22222					0.00300012	0.00495868
313	ACH-000803	COLO668_LUNG	Lung	chr5	1253282	1253946	TERT	5_1253744_G_A	32	23	17	21	55	38	CCLE_WGS	0.581818	0.447368	1.3913	0.809524	0.581845	0.588551	0	-0.00562643
314	ACH-000804	NB1_AUTONOMIC_GANGLIA	Peripheral nervous system	chr5	1255402	1255526	TERT	5_1255520_G_A	17	17	1	44	34	45	CCLE_WES	0.5	0.0222222	1	0.0227273	0.0227273	0.0337079	1	0.00300012	0.00495868
315	ACH-000810	SKMEL30_SKIN	Skin	chr5	1253282	1253946	TERT	5_1253744_G_A	27	32	23	0	59	23	CCLE_WGS	0.457627	1	0.84375	inf	inf	55.5455	1	-0.00562643
316	ACH-000811	SKOV3_OVARY	Ovary	chr5	1254483	1254620	TERT	5_1254594_C_T	19	27			46		CCLE_WGS	0.413043		0.703704					-0.00323017	-0.00231405
317	ACH-000811	SKOV3_OVARY	Ovary	chr5	1253282	1253946	TERT	5_1253744_G_A	26	23			49		CCLE_WGS	0.530612		1.13043					-0.00562643
318	ACH-000817	RPMI8226_HAEMATOPOIETIC_AND_LYMPHOID_TISSUE	Plasma cell	chr5	1293428	1294781	TERT	5_1294086_C_T	26	20	2	37	46	39	CCLE_WGS	0.565217	0.0512821	1.3	0.0540541	0.04158	0.0515723	1	0.0152882	0.00793388
319	ACH-000817	RPMI8226_HAEMATOPOIETIC_AND_LYMPHOID_TISSUE	Plasma cell	chr5	1253282	1253946	TERT	5_1253744_G_A	30	27	61	0	57	61	CCLE_WGS	0.526316	1	1.11111	inf	inf	110.902	1	-0.00562643
320	ACH-000818	BT483_BREAST	Breast	chr5	1255402	1255526	TERT	5_1255520_G_A	35	8			43		CCLE_WGS	0.813953		4.375					0.00300012	0.00495868
321	ACH-000818	BT483_BREAST	Breast	chr5	1271234	1271319	TERT	5_1271308_C_G	24	15			39		CCLE_WGS	0.615385		1.6					-0.000575104
322	ACH-000819	LN18_CENTRAL_NERVOUS_SYSTEM	Central nervous system	chr5	1253282	1253946	TERT	5_1253744_G_A	13	23	46	0	36	46	CCLE_WGS	0.361111	1	0.565217	inf	inf	161.889	1	-0.00562643
323	ACH-000819	LN18_CENTRAL_NERVOUS_SYSTEM	Central nervous system	chr5	1293428	1294781	TERT	5_1294086_C_T	12	29	21	0	41	21	CCLE_WGS	0.292683	1	0.413793	inf	inf	101.48	1	0.0152882	0.00793388
324	ACH-000832	CAL27_UPPER_AERODIGESTIVE_TRACT	Upper aerodigestive	chr5	1293428	1294781	TERT	5_1294086_C_T	23	25			48		CCLE_WGS	0.479167		0.92					0.0152882	0.00793388
325	ACH-000832	CAL27_UPPER_AERODIGESTIVE_TRACT	Upper aerodigestive	chr5	1293428	1294781	TERT	5_1294150_G_A	17	11			28		CCLE_WGS	0.607143		1.54545					0.00252087
326	ACH-000832	CAL27_UPPER_AERODIGESTIVE_TRACT	Upper aerodigestive	chr5	1255402	1255526	TERT	5_1255520_G_A	22	19	1	8	41	9	CCLE_WGS	0.536585	0.111111	1.15789	0.125	0.107955	0.152941	1	0.00300012	0.00495868
327	ACH-000838	AMO1_HAEMATOPOIETIC_AND_LYMPHOID_TISSUE	Plasma cell	chr5	1255402	1255526	TERT	5_1255520_G_A	27	20	191	191	47	382	CCLE_WES	0.574468	0.5	1.35	1	0.740741	0.745455	0	0.00300012	0.00495868
328	ACH-000839	SCABER_URINARY_TRACT	Urinary tract	chr5	1253282	1253946	TERT	5_1253744_G_A	16	21	0	25	37	25	CCLE_WGS	0.432432	0	0.761905	0	0	0.0255496	1	-0.00562643
329	ACH-000842	SW480_LARGE_INTESTINE	Colorectal	chr5	1293428	1294781	TERT	5_1294086_C_T	46	18			64		CCLE_WGS	0.71875		2.55556					0.0152882	0.00793388
330	ACH-000848	JHH7_LIVER	Liver	chr5	1293428	1294781	TERT	5_1294086_C_T	34	50	38	0	84	38	CCLE_WGS	0.404762	1	0.68	inf	inf	112.71	1	0.0152882	0.00793388
331	ACH-000852	NCIH1435_LUNG	Lung	chr5	1293428	1294781	TERT	5_1294086_C_T	19	53	10	0	72	10	CCLE_WGS	0.263889	1	0.358491	inf	inf	57.6154	1	0.0152882	0.00793388
332	ACH-000856	CAL51_BREAST	Breast	chr5	1253282	1253946	TERT	5_1253918_C_T	13	14			27		CCLE_WGS	0.481481		0.928571					-0.00207996	0
333	ACH-000856	CAL51_BREAST	Breast	chr5	1293428	1294781	TERT	5_1294086_C_T	19	9			28		CCLE_WGS	0.678571		2.11111					0.0152882	0.00793388
334	ACH-000859	HCC1954_BREAST	Breast	chr5	1255402	1255526	TERT	5_1255520_G_A	53	386			439		CCLE_WGS	0.120729		0.137306					0.00300012	0.00495868
335	ACH-000860	NCIH358_LUNG	Lung	chr5	1255402	1255526	TERT	5_1255520_G_A	28	38			66		CCLE_WGS	0.424242		0.736842					0.00300012	0.00495868
336	ACH-000860	NCIH358_LUNG	Lung	chr5	1253282	1253946	TERT	5_1253641_C_A	35	16			51		CCLE_WGS	0.686275		2.1875					-0.000575104
337	ACH-000865	KYSE450_OESOPHAGUS	Esophagus	chr5	1293428	1294781	TERT	5_1294086_C_T	52	13	11	8	65	19	CCLE_WGS	0.8	0.578947	4	1.375	0.34375	0.347899	0	0.0152882	0.00793388
338	ACH-000866	NCIH1048_LUNG	Lung	chr5	1253282	1253946	TERT	5_1253744_G_A	14	17			31		CCLE_WGS	0.451613		0.823529					-0.00562643
339	ACH-000867	CHAGOK1_LUNG	Lung	chr5	1253282	1253946	TERT	5_1253744_G_A	29	26			55		CCLE_WGS	0.527273		1.11538					-0.00562643
340	ACH-000870	NCIH1930_LUNG	Lung	chr5	1253282	1253946	TERT	5_1253638_G_A	54	25	46	9	79	55	CCLE_WGS	0.683544	0.836364	2.16	5.11111	2.36626	2.2902	0	-0.000575104
341	ACH-000878	HCC15_LUNG	Lung	chr5	1253282	1253946	TERT	5_1253744_G_A	24	23	3	8	47	11	CCLE_WGS	0.510638	0.272727	1.04348	0.375	0.359375	0.394958	0	-0.00562643
342	ACH-000878	HCC15_LUNG	Lung	chr5	1293428	1294781	TERT	5_1294086_C_T	38	29			67		CCLE_WGS	0.567164		1.31034					0.0152882	0.00793388
343	ACH-000879	MFE296_ENDOMETRIUM	Uterus	chr5	1293428	1294781	TERT	5_1294166_C_T	17	17			34		CCLE_WGS	0.5		1					0.00216622
344	ACH-000879	MFE296_ENDOMETRIUM	Uterus	chr5	1253282	1253946	TERT	5_1253744_G_A	21	35	8	1	56	9	CCLE_WGS	0.375	0.888889	0.6	8	13.3333	9.35659	1	-0.00562643
345	ACH-000888	NCIH1793_LUNG	Lung	chr5	1293428	1294781	TERT	5_1294086_C_T	26	34			60		CCLE_WGS	0.433333		0.764706					0.0152882	0.00793388
346	ACH-000888	NCIH1793_LUNG	Lung	chr5	1266565	1266650	TERT	5_1266593_C_T	22	20			42		CCLE_WGS	0.52381		1.1					-0.000575104
347	ACH-000889	KMM1_HAEMATOPOIETIC_AND_LYMPHOID_TISSUE	Plasma cell	chr5	1255402	1255526	TERT	5_1255520_G_A	21	13	213	159	34	372	CCLE_WES	0.617647	0.572581	1.61538	1.33962	0.82929	0.84049	0	0.00300012	0.00495868
348	ACH-000893	NCIH1651_LUNG	Lung	chr5	1254483	1254620	TERT	5_1254594_C_T	14	57			71		CCLE_WGS	0.197183		0.245614					-0.00323017	-0.00231405
349	ACH-000893	NCIH1651_LUNG	Lung	chr5	1253282	1253946	TERT	5_1253744_G_A	9	56			65		CCLE_WGS	0.138462		0.160714					-0.00562643
350	ACH-000894	NCIH1869_LUNG	Lung	chr5	1253282	1253946	TERT	5_1253744_G_A	39	35	63	8	74	71	CCLE_WGS	0.527027	0.887324	1.11429	7.875	7.06731	6.71407	1	-0.00562643
351	ACH-000905	5637_URINARY_TRACT	Urinary tract	chr5	1255402	1255526	TERT	5_1255520_G_A	26	24	0	10	50	10	CCLE_WGS	0.52	0	1.08333	0	0	0.0440252	1	0.00300012	0.00495868
352	ACH-000908	SNU520_STOMACH	Gastric	chr5	1255402	1255526	TERT	5_1255520_G_A	18	11			29		CCLE_WES	0.62069		1.63636					0.00300012	0.00495868
353	ACH-000909	JHUEM2_ENDOMETRIUM	Uterus	chr5	1255402	1255526	TERT	5_1255520_G_A	21	11			32		CCLE_WES	0.65625		1.90909					0.00300012	0.00495868
354	ACH-000910	MDAMB453_BREAST	Breast	chr5	1255402	1255526	TERT	5_1255520_G_A	19	13			32		CCLE_WGS	0.59375		1.46154					0.00300012	0.00495868
355	ACH-000919	IM95_STOMACH	Gastric	chr5	1293428	1294781	TERT	5_1294086_C_T	25	16	32	0	41	32	CCLE_WGS	0.609756	1	1.5625	inf	inf	42.0588	1	0.0152882	0.00793388
356	ACH-000919	IM95_STOMACH	Gastric	chr5	1293428	1294781	TERT	5_1294282_C_T	21	27	10	0	48	10	CCLE_WGS	0.4375	1	0.777778	inf	inf	26.8605	1	-0.000575104
357	ACH-000920	CMLT1_HAEMATOPOIETIC_AND_LYMPHOID_TISSUE	Blood	chr5	1255402	1255526	TERT	5_1255520_G_A	22	15			37		CCLE_WES	0.594595		1.46667					0.00300012	0.00495868
358	ACH-000920	CMLT1_HAEMATOPOIETIC_AND_LYMPHOID_TISSUE	Blood	chr5	1293428	1294781	TERT	5_1293462_G_A	38	23			61		CCLE_WES	0.622951		1.65217						0
359	ACH-000927	BT474_BREAST	Breast	chr5	1255402	1255526	TERT	5_1255520_G_A	40	19	8	0	59	8	CCLE_WGS	0.677966	1	2.10526	inf	inf	8.18519	1	0.00300012	0.00495868
360	ACH-000927	BT474_BREAST	Breast	chr5	1279406	1279585	TERT	5_1279423_C_T	70	11			81		CCLE_WGS	0.864198		6.36364					-0.000575104
361	ACH-000928	JHUEM1_ENDOMETRIUM	Uterus	chr5	1255402	1255526	TERT	5_1255520_G_A	12	11	6	9	23	15	CCLE_WGS	0.521739	0.4	1.09091	0.666667	0.611111	0.629474	0	0.00300012	0.00495868
362	ACH-000930	HCC1569_BREAST	Breast	chr5	1253282	1253946	TERT	5_1253321_A_T	20	10			30		CCLE_WGS	0.666667		2					-0.000575104
363	ACH-000932	SNU1_STOMACH	Gastric	chr5	1279406	1279585	TERT	5_1279448_A_G	23	22	0	12	45	12	CCLE_WGS	0.511111	0	1.04545	0	0	0.0382979	1	-0.000575104
364	ACH-000932	SNU1_STOMACH	Gastric	chr5	1293428	1294781	TERT	5_1294086_C_T	18	17	0	15	35	15	CCLE_WGS	0.514286	0	1.05882	0	0	0.0305144	1	0.0152882	0.00793388
365	ACH-000934	MDAMB361_BREAST	Breast	chr5	1255402	1255526	TERT	5_1255520_G_A	31	69			100		CCLE_WGS	0.31		0.449275					0.00300012	0.00495868
366	ACH-000934	MDAMB361_BREAST	Breast	chr5	1253282	1253946	TERT	5_1253744_G_A	55	13			68		CCLE_WGS	0.808824		4.23077					-0.00562643
367	ACH-000936	EFO27_OVARY	Ovary	chr5	1279406	1279585	TERT	5_1279457_G_A	19	28			47		CCLE_WGS	0.404255		0.678571					-0.000575104
368	ACH-000936	EFO27_OVARY	Ovary	chr5	1293428	1294781	TERT	5_1294086_C_T	19	22			41		CCLE_WGS	0.463415		0.863636					0.0152882	0.00793388
369	ACH-000939	SKUT1_SOFT_TISSUE	Soft tissue	chr5	1280273	1280453	TERT	5_1280405_G_A	23	19	8	0	42	8	CCLE_WGS	0.547619	1	1.21053	inf	inf	14.1064	1	-0.000575104
370	ACH-000939	SKUT1_SOFT_TISSUE	Soft tissue	chr5	1253282	1253946	TERT	5_1253918_C_T	10	16			26		CCLE_WGS	0.384615		0.625					-0.00207996	0
371	ACH-000939	SKUT1_SOFT_TISSUE	Soft tissue	chr5	1253282	1253946	TERT	5_1253744_G_A	20	17			37		CCLE_WGS	0.540541		1.17647					-0.00562643
372	ACH-000940	AN3CA_ENDOMETRIUM	Uterus	chr5	1253282	1253946	TERT	5_1253330_G_A	30	12			42		CCLE_WGS	0.714286		2.5					-0.000575104
373	ACH-000940	AN3CA_ENDOMETRIUM	Uterus	chr5	1253282	1253946	TERT	5_1253744_G_A	11	28	0	12	39	12	CCLE_WGS	0.282051	0	0.392857	0	0	0.0991304	1	-0.00562643
374	ACH-000940	AN3CA_ENDOMETRIUM	Uterus	chr5	1268635	1268748	TERT	5_1268674_T_C	33	13	13	2	46	15	CCLE_WGS	0.717391	0.866667	2.53846	6.5	2.56061	2.17612	0	-0.000575104
375	ACH-000942	HPBALL_HAEMATOPOIETIC_AND_LYMPHOID_TISSUE	Blood	chr5	1255402	1255526	TERT	5_1255520_G_A	27	23	38	0	50	38	CCLE_WES	0.54	1	1.17391	inf	inf	65.8	1	0.00300012	0.00495868
376	ACH-000945	NCIH650_LUNG	Lung	chr5	1293428	1294781	TERT	5_1294099_C_T	79	9	9	0	88	9	CCLE_WGS	0.897727	1	8.77778	inf	inf	2.27044	0	-0.000575104
377	ACH-000945	NCIH650_LUNG	Lung	chr5	1293428	1294781	TERT	5_1294086_C_T	11	66	0	10	77	10	CCLE_WGS	0.142857	0	0.166667	0	0	0.275362	0	0.0152882	0.00793388
378	ACH-000947	OVK18_OVARY	Ovary	chr5	1293428	1294781	TERT	5_1294086_C_T	13	20	9	10	33	19	CCLE_WGS	0.393939	0.473684	0.65	0.9	1.38462	1.3739	0	0.0152882	0.00793388
379	ACH-000948	2313287_STOMACH	Gastric	chr5	1293428	1294781	TERT	5_1293504_C_T	23	32			55		CCLE_WGS	0.418182		0.71875					-0.000575104
380	ACH-000948	2313287_STOMACH	Gastric	chr5	1255402	1255526	TERT	5_1255520_G_A	26	27			53		CCLE_WGS	0.490566		0.962963					0.00300012	0.00495868
381	ACH-000950	LOVO_LARGE_INTESTINE	Colorectal	chr5	1279406	1279585	TERT	5_1279527_G_A	39	10	23	0	49	23	CCLE_WGS	0.795918	1	3.9	inf	inf	12.4937	1	-0.000575104
382	ACH-000954	HEC1A_ENDOMETRIUM	Uterus	chr5	1293428	1294781	TERT	5_1293439_C_T	18	17			35		CCLE_WGS	0.514286		1.05882					-0.000575104
383	ACH-000954	HEC1A_ENDOMETRIUM	Uterus	chr5	1293428	1294781	TERT	5_1294086_C_T	20	18			38		CCLE_WGS	0.526316		1.11111					0.0152882	0.00793388
384	ACH-000955	SNU407_LARGE_INTESTINE	Colorectal	chr5	1255402	1255526	TERT	5_1255520_G_A	19	18	8	11	37	19	CCLE_WGS	0.513514	0.421053	1.05556	0.727273	0.688995	0.701226	0	0.00300012	0.00495868
385	ACH-000956	22RV1_PROSTATE	Prostate	chr5	1253282	1253946	TERT	5_1253744_G_A	17	17	10	17	34	27	CCLE_WGS	0.5	0.37037	1	0.588235	0.588235	0.6	0	-0.00562643
386	ACH-000956	22RV1_PROSTATE	Prostate	chr5	1255402	1255526	TERT	5_1255520_G_A	16	23	39	24	39	63	CCLE_WGS	0.410256	0.619048	0.695652	1.625	2.33594	2.29623	0	0.00300012	0.00495868
387	ACH-000956	22RV1_PROSTATE	Prostate	chr5	1272300	1272395	TERT	5_1272328_G_A	18	22			40		CCLE_WGS	0.45		0.818182					-0.000575104
388	ACH-000956	22RV1_PROSTATE	Prostate	chr5	1255402	1255526	TERT	5_1255520_G_A	19	20	39	24	39	63	CCLE_WES	0.487179	0.619048	0.95	1.625	1.71053	1.69492	0	0.00300012	0.00495868
389	ACH-000956	22RV1_PROSTATE	Prostate	chr5	1293428	1294781	TERT	5_1294086_C_T	10	19	2	7	29	9	CCLE_WGS	0.344828	0.222222	0.526316	0.285714	0.542857	0.619048	0	0.0152882	0.00793388
390	ACH-000957	LS180_LARGE_INTESTINE	Colorectal	chr5	1293428	1294781	TERT	5_1293767_G_A	18	14			32		CCLE_WGS	0.5625		1.28571					-0.00115021
391	ACH-000958	SW48_LARGE_INTESTINE	Colorectal	chr5	1254483	1254620	TERT	5_1254594_C_T	15	23			38		CCLE_WGS	0.394737		0.652174					-0.00323017	-0.00231405
392	ACH-000959	SNUC4_LARGE_INTESTINE	Colorectal	chr5	1255402	1255526	TERT	5_1255520_G_A	13	15			28		CCLE_WES	0.464286		0.866667					0.00300012	0.00495868
393	ACH-000961	ISHIKAWAHERAKLIO02ER_ENDOMETRIUM	Uterus	chr5	1293428	1294781	TERT	5_1294086_C_T	20	15			35		CCLE_WGS	0.571429		1.33333					0.0152882	0.00793388
394	ACH-000963	CCK81_LARGE_INTESTINE	Colorectal	chr5	1293428	1294781	TERT	5_1294686_G_A	36	10			46		CCLE_WGS	0.782609		3.6					-0.000575104
395	ACH-000964	MOLT3_HAEMATOPOIETIC_AND_LYMPHOID_TISSUE	Blood	chr5	1278756	1278911	TERT	5_1278787_T_C	291	252			543		CCLE_WES	0.535912		1.15476						0
396	ACH-000965	RL952_ENDOMETRIUM	Uterus	chr5	1280273	1280453	TERT	5_1280308_C_T	13	18			31		CCLE_WGS	0.419355		0.722222					-0.000575104
397	ACH-000965	RL952_ENDOMETRIUM	Uterus	chr5	1293428	1294781	TERT	5_1294580_G_A	12	13			25		CCLE_WGS	0.48		0.923077					-0.000575104
398	ACH-000966	IGROV1_OVARY	Ovary	chr5	1253282	1253946	TERT	5_1253744_G_A	19	18	0	13	37	13	CCLE_WGS	0.513514	0	1.05556	0	0	0.0351377	1	-0.00562643
399	ACH-000966	IGROV1_OVARY	Ovary	chr5	1254483	1254620	TERT	5_1254594_C_T	19	23	1	14	42	15	CCLE_WGS	0.452381	0.0666667	0.826087	0.0714286	0.0864662	0.124668	1	-0.00323017	-0.00231405
400	ACH-000971	HCT116_LARGE_INTESTINE	Colorectal	chr5	1293428	1294781	TERT	5_1294089_G_A	37	10	7	1	47	8	CCLE_WGS	0.787234	0.875	3.7	7	1.89189	1.4	0	-0.000575104
401	ACH-000971	HCT116_LARGE_INTESTINE	Colorectal	chr5	1293428	1294781	TERT	5_1293551_C_T	32	28	4	5	60	9	CCLE_WGS	0.533333	0.444444	1.14286	0.8	0.7	0.717483	0	-0.000575104
402	ACH-000972	HEC151_ENDOMETRIUM	Uterus	chr5	1280273	1280453	TERT	5_1280450_C_T	24	25	0	20	49	20	CCLE_WES	0.489796	0	0.96	0	0	0.0253858	1		0
403	ACH-000972	HEC151_ENDOMETRIUM	Uterus	chr5	1255402	1255526	TERT	5_1255520_G_A	30	17	17	0	47	17	CCLE_WES	0.638298	1	1.76471	inf	inf	20.082	1	0.00300012	0.00495868
404	ACH-000974	SNGM_ENDOMETRIUM	Uterus	chr5	1255402	1255526	TERT	5_1255520_G_A	21	20			41		CCLE_WES	0.512195		1.05					0.00300012	0.00495868
405	ACH-000974	SNGM_ENDOMETRIUM	Uterus	chr5	1293428	1294781	TERT	5_1294251_G_A	40	8			48		CCLE_WGS	0.833333		5					-0.000575104
406	ACH-000974	SNGM_ENDOMETRIUM	Uterus	chr5	1255402	1255526	TERT	5_1255520_G_A	21	35			56		CCLE_WGS	0.375		0.6					0.00300012	0.00495868
407	ACH-000974	SNGM_ENDOMETRIUM	Uterus	chr5	1293428	1294781	TERT	5_1294086_C_T	23	24			47		CCLE_WGS	0.489362		0.958333					0.0152882	0.00793388
408	ACH-000977	LNCAPCLONEFGC_PROSTATE	Prostate	chr5	1266565	1266650	TERT	5_1266640_G_A	8	9	31	16	17	47	CCLE_WES	0.470588	0.659574	0.888889	1.9375	2.17969	2.13369	0		0
409	ACH-000982	GP2D_LARGE_INTESTINE	Colorectal	chr5	1253282	1253946	TERT	5_1253744_G_A	14	18	5	17	32	22	CCLE_WGS	0.4375	0.227273	0.777778	0.294118	0.378151	0.400985	0	-0.00562643
410	ACH-000982	GP2D_LARGE_INTESTINE	Colorectal	chr5	1271234	1271319	TERT	5_1271282_T_C	15	17	9	2	32	11	CCLE_WGS	0.46875	0.818182	0.882353	4.5	5.1	4.29032	0	-0.000575104
411	ACH-000982	GP2D_LARGE_INTESTINE	Colorectal	chr5	1293428	1294781	TERT	5_1294086_C_T	13	26	4	4	39	8	CCLE_WGS	0.333333	0.5	0.5	1	2	1.96296	0	0.0152882	0.00793388
412	ACH-000983	KCL22_HAEMATOPOIETIC_AND_LYMPHOID_TISSUE	Blood	chr5	1255402	1255526	TERT	5_1255520_G_A	21	20	11	1	41	12	CCLE_WES	0.512195	0.916667	1.05	11	10.4762	7.31008	1	0.00300012	0.00495868
413	ACH-000984	HEC6_ENDOMETRIUM	Uterus	chr5	1255402	1255526	TERT	5_1255520_G_A	24	24			48		CCLE_WES	0.5		1					0.00300012	0.00495868
414	ACH-000984	HEC6_ENDOMETRIUM	Uterus	chr5	1254483	1254620	TERT	5_1254501_G_T	60	29			89		CCLE_WES	0.674157		2.06897						0
415	ACH-000985	LS411N_LARGE_INTESTINE	Colorectal	chr5	1253282	1253946	TERT	5_1253918_C_T	8	36	13	0	44	13	CCLE_WGS	0.181818	1	0.222222	inf	inf	115.941	1	-0.00207996	0
416	ACH-000985	LS411N_LARGE_INTESTINE	Colorectal	chr5	1280273	1280453	TERT	5_1280305_C_T	33	8			41		CCLE_WGS	0.804878		4.125					-0.000575104
417	ACH-000985	LS411N_LARGE_INTESTINE	Colorectal	chr5	1293428	1294781	TERT	5_1294086_C_T	44	13			57		CCLE_WGS	0.77193		3.38462					0.0152882	0.00793388
418	ACH-000986	HT115_LARGE_INTESTINE	Colorectal	chr5	1293428	1294781	TERT	5_1294086_C_T	16	8	22	1	24	23	CCLE_WGS	0.666667	0.956522	2	22	11	7.72727	1	0.0152882	0.00793388
419	ACH-000988	MFE319_ENDOMETRIUM	Uterus	chr5	1280273	1280453	TERT	5_1280379_G_A	16	28			44		CCLE_WGS	0.363636		0.571429					-0.000575104
420	ACH-000989	SNU175_LARGE_INTESTINE	Colorectal	chr5	1278756	1278911	TERT	5_1278815_G_A	215	166	7	6	381	13	CCLE_WES	0.564304	0.538462	1.29518	1.16667	0.900775	0.891487	0		-0.00115702
421	ACH-000989	SNU175_LARGE_INTESTINE	Colorectal	chr5	1271234	1271319	TERT	5_1271301_C_T	12	19			31		CCLE_WES	0.387097		0.631579						-0.00115702
422	ACH-000989	SNU175_LARGE_INTESTINE	Colorectal	chr5	1293428	1294781	TERT	5_1293485_G_A	21	18			39		CCLE_WES	0.538462		1.16667						-0.00115702
423	ACH-000990	HEC108_ENDOMETRIUM	Uterus	chr5	1255402	1255526	TERT	5_1255520_G_A	17	36			53		CCLE_WES	0.320755		0.472222					0.00300012	0.00495868
424	ACH-000990	HEC108_ENDOMETRIUM	Uterus	chr5	1254483	1254620	TERT	5_1254510_C_T	98	9			107		CCLE_WES	0.915888		10.8889						0
425	ACH-000993	JHUEM7_ENDOMETRIUM	Uterus	chr5	1271234	1271319	TERT	5_1271284_G_A	9	9			18		CCLE_WES	0.5		1						0
426	ACH-000994	HEC59_ENDOMETRIUM	Uterus	chr5	1278756	1278911	TERT	5_1278821_C_T	436	198			634		CCLE_WES	0.687697		2.20202						0
427	ACH-000994	HEC59_ENDOMETRIUM	Uterus	chr5	1255402	1255526	TERT	5_1255520_G_A	41	22			63		CCLE_WES	0.650794		1.86364					0.00300012	0.00495868
428	ACH-000995	JURKAT_HAEMATOPOIETIC_AND_LYMPHOID_TISSUE	Blood	chr5	1293428	1294781	TERT	5_1293454_T_C	39	32	9	19	71	28	CCLE_WES	0.549296	0.321429	1.21875	0.473684	0.388664	0.400844	0		0
429	ACH-000996	HEC251_ENDOMETRIUM	Uterus	chr5	1255402	1255526	TERT	5_1255520_G_A	17	26	9	0	43	9	CCLE_WES	0.395349	1	0.653846	inf	inf	28.7714	1	0.00300012	0.00495868
430	ACH-000997	HCT15_LARGE_INTESTINE	Colorectal	chr5	1293428	1294781	TERT	5_1294086_C_T	26	13			39		CCLE_WGS	0.666667		2					0.0152882	0.00793388
431	ACH-001106	KOPN8_HAEMATOPOIETIC_AND_LYMPHOID_TISSUE	Blood	chr5	1255402	1255526	TERT	5_1255520_G_A	20	20	60	6	40	66	CCLE_WES	0.5	0.909091	1	10	10	9.30769	1	0.00300012	0.00495868
432	ACH-001129	MONOMAC1_HAEMATOPOIETIC_AND_LYMPHOID_TISSUE	Blood	chr5	1253282	1253946	TERT	5_1253918_C_T	13	21	26	23	34	49	CCLE_WGS	0.382353	0.530612	0.619048	1.13043	1.82609	1.7959	0	-0.00207996	0
433	ACH-001129	MONOMAC1_HAEMATOPOIETIC_AND_LYMPHOID_TISSUE	Blood	chr5	1293428	1294781	TERT	5_1294086_C_T	15	19	4	7	34	11	CCLE_WGS	0.441176	0.363636	0.789474	0.571429	0.72381	0.754839	0	0.0152882	0.00793388
434	ACH-001321	TT_THYROID	Thyroid	chr5	1255402	1255526	TERT	5_1255520_G_A	24	22	28	19	46	47	CCLE_WES	0.521739	0.595745	1.09091	1.47368	1.35088	1.34223	0	0.00300012	0.00495868

## Sheet: TERT_ASE
Supplementary Table S4b: ASE estimates for TERT
Collapsed ASE calls for TERT
Achilles_ID	CCLE_name	Disease	Exon_chromosome	Exon_start	Exon_end	Gene_name	SNP	DNA_ref_count	DNA_alt_count	RNA_ref_count	RNA_alt_count	DNA_total_count	RNA_total_count	DNA_source	DNA_ref_frac	RNA_ref_frac	DNA_ratio	RNA_ratio	RNA_DNA_foldchange	RNA_DNA_foldchange_pseudo	MAE	CCLE_WGS_linkage_disequilibrium	CCLE_WES_linkage_disequilibrium
ACH-001321	TT_THYROID	Thyroid	chr5	1255402	1255526	TERT	5_1255520_G_A	24	22	28	19	46	47	CCLE_WES	0.521739	0.595745	1.09091	1.47368	1.35088	1.34223	0	0.00300012	0.00495868
ACH-001129	MONOMAC1_HAEMATOPOIETIC_AND_LYMPHOID_TISSUE	Blood	chr5	1253282	1253946	TERT	5_1253918_C_T	13	21	26	23	34	49	CCLE_WGS	0.382353	0.530612	0.619048	1.13043	1.82609	1.7959	0	-0.00207996	0
ACH-001106	KOPN8_HAEMATOPOIETIC_AND_LYMPHOID_TISSUE	Blood	chr5	1255402	1255526	TERT	5_1255520_G_A	20	20	60	6	40	66	CCLE_WES	0.5	0.909091	1	10	10	9.30769	1	0.00300012	0.00495868
ACH-000996	HEC251_ENDOMETRIUM	Uterus	chr5	1255402	1255526	TERT	5_1255520_G_A	17	26	9	0	43	9	CCLE_WES	0.395349	1	0.653846	inf	inf	28.7714	1	0.00300012	0.00495868
ACH-000995	JURKAT_HAEMATOPOIETIC_AND_LYMPHOID_TISSUE	Blood	chr5	1293428	1294781	TERT	5_1293454_T_C	39	32	9	19	71	28	CCLE_WES	0.549296	0.321429	1.21875	0.473684	0.388664	0.400844	0		0
ACH-000989	SNU175_LARGE_INTESTINE	Colorectal	chr5	1278756	1278911	TERT	5_1278815_G_A	215	166	7	6	381	13	CCLE_WES	0.564304	0.538462	1.29518	1.16667	0.900775	0.891487	0		-0.00115702
ACH-000986	HT115_LARGE_INTESTINE	Colorectal	chr5	1293428	1294781	TERT	5_1294086_C_T	16	8	22	1	24	23	CCLE_WGS	0.666667	0.956522	2	22	11	7.72727	1	0.0152882	0.00793388
ACH-000985	LS411N_LARGE_INTESTINE	Colorectal	chr5	1253282	1253946	TERT	5_1253918_C_T	8	36	13	0	44	13	CCLE_WGS	0.181818	1	0.222222	inf	inf	115.941	1	-0.00207996	0
ACH-000983	KCL22_HAEMATOPOIETIC_AND_LYMPHOID_TISSUE	Blood	chr5	1255402	1255526	TERT	5_1255520_G_A	21	20	11	1	41	12	CCLE_WES	0.512195	0.916667	1.05	11	10.4762	7.31008	1	0.00300012	0.00495868
ACH-000982	GP2D_LARGE_INTESTINE	Colorectal	chr5	1253282	1253946	TERT	5_1253744_G_A	14	18	5	17	32	22	CCLE_WGS	0.4375	0.227273	0.777778	0.294118	0.378151	0.400985	0	-0.00562643
ACH-000977	LNCAPCLONEFGC_PROSTATE	Prostate	chr5	1266565	1266650	TERT	5_1266640_G_A	8	9	31	16	17	47	CCLE_WES	0.470588	0.659574	0.888889	1.9375	2.17969	2.13369	0		0
ACH-000972	HEC151_ENDOMETRIUM	Uterus	chr5	1280273	1280453	TERT	5_1280450_C_T	24	25	0	20	49	20	CCLE_WES	0.489796	0	0.96	0	0	0.0253858	1		0
ACH-000971	HCT116_LARGE_INTESTINE	Colorectal	chr5	1293428	1294781	TERT	5_1293551_C_T	32	28	4	5	60	9	CCLE_WGS	0.533333	0.444444	1.14286	0.8	0.7	0.717483	0	-0.000575104
ACH-000966	IGROV1_OVARY	Ovary	chr5	1254483	1254620	TERT	5_1254594_C_T	19	23	1	14	42	15	CCLE_WGS	0.452381	0.0666667	0.826087	0.0714286	0.0864662	0.124668	1	-0.00323017	-0.00231405
ACH-000956	22RV1_PROSTATE	Prostate	chr5	1255402	1255526	TERT	5_1255520_G_A	16	23	39	24	39	63	CCLE_WGS	0.410256	0.619048	0.695652	1.625	2.33594	2.29623	0	0.00300012	0.00495868
ACH-000955	SNU407_LARGE_INTESTINE	Colorectal	chr5	1255402	1255526	TERT	5_1255520_G_A	19	18	8	11	37	19	CCLE_WGS	0.513514	0.421053	1.05556	0.727273	0.688995	0.701226	0	0.00300012	0.00495868
ACH-000950	LOVO_LARGE_INTESTINE	Colorectal	chr5	1279406	1279585	TERT	5_1279527_G_A	39	10	23	0	49	23	CCLE_WGS	0.795918	1	3.9	inf	inf	12.4937	1	-0.000575104
ACH-000947	OVK18_OVARY	Ovary	chr5	1293428	1294781	TERT	5_1294086_C_T	13	20	9	10	33	19	CCLE_WGS	0.393939	0.473684	0.65	0.9	1.38462	1.3739	0	0.0152882	0.00793388
ACH-000945	NCIH650_LUNG	Lung	chr5	1293428	1294781	TERT	5_1294086_C_T	11	66	0	10	77	10	CCLE_WGS	0.142857	0	0.166667	0	0	0.275362	0	0.0152882	0.00793388
ACH-000942	HPBALL_HAEMATOPOIETIC_AND_LYMPHOID_TISSUE	Blood	chr5	1255402	1255526	TERT	5_1255520_G_A	27	23	38	0	50	38	CCLE_WES	0.54	1	1.17391	inf	inf	65.8	1	0.00300012	0.00495868
ACH-000940	AN3CA_ENDOMETRIUM	Uterus	chr5	1268635	1268748	TERT	5_1268674_T_C	33	13	13	2	46	15	CCLE_WGS	0.717391	0.866667	2.53846	6.5	2.56061	2.17612	0	-0.000575104
ACH-000939	SKUT1_SOFT_TISSUE	Soft tissue	chr5	1280273	1280453	TERT	5_1280405_G_A	23	19	8	0	42	8	CCLE_WGS	0.547619	1	1.21053	inf	inf	14.1064	1	-0.000575104
ACH-000932	SNU1_STOMACH	Gastric	chr5	1293428	1294781	TERT	5_1294086_C_T	18	17	0	15	35	15	CCLE_WGS	0.514286	0	1.05882	0	0	0.0305144	1	0.0152882	0.00793388
ACH-000928	JHUEM1_ENDOMETRIUM	Uterus	chr5	1255402	1255526	TERT	5_1255520_G_A	12	11	6	9	23	15	CCLE_WGS	0.521739	0.4	1.09091	0.666667	0.611111	0.629474	0	0.00300012	0.00495868
ACH-000927	BT474_BREAST	Breast	chr5	1255402	1255526	TERT	5_1255520_G_A	40	19	8	0	59	8	CCLE_WGS	0.677966	1	2.10526	inf	inf	8.18519	1	0.00300012	0.00495868
ACH-000919	IM95_STOMACH	Gastric	chr5	1293428	1294781	TERT	5_1294086_C_T	25	16	32	0	41	32	CCLE_WGS	0.609756	1	1.5625	inf	inf	42.0588	1	0.0152882	0.00793388
ACH-000905	5637_URINARY_TRACT	Urinary tract	chr5	1255402	1255526	TERT	5_1255520_G_A	26	24	0	10	50	10	CCLE_WGS	0.52	0	1.08333	0	0	0.0440252	1	0.00300012	0.00495868
ACH-000894	NCIH1869_LUNG	Lung	chr5	1253282	1253946	TERT	5_1253744_G_A	39	35	63	8	74	71	CCLE_WGS	0.527027	0.887324	1.11429	7.875	7.06731	6.71407	1	-0.00562643
ACH-000889	KMM1_HAEMATOPOIETIC_AND_LYMPHOID_TISSUE	Plasma cell	chr5	1255402	1255526	TERT	5_1255520_G_A	21	13	213	159	34	372	CCLE_WES	0.617647	0.572581	1.61538	1.33962	0.82929	0.84049	0	0.00300012	0.00495868
ACH-000879	MFE296_ENDOMETRIUM	Uterus	chr5	1253282	1253946	TERT	5_1253744_G_A	21	35	8	1	56	9	CCLE_WGS	0.375	0.888889	0.6	8	13.3333	9.35659	1	-0.00562643
ACH-000878	HCC15_LUNG	Lung	chr5	1253282	1253946	TERT	5_1253744_G_A	24	23	3	8	47	11	CCLE_WGS	0.510638	0.272727	1.04348	0.375	0.359375	0.394958	0	-0.00562643
ACH-000870	NCIH1930_LUNG	Lung	chr5	1253282	1253946	TERT	5_1253638_G_A	54	25	46	9	79	55	CCLE_WGS	0.683544	0.836364	2.16	5.11111	2.36626	2.2902	0	-0.000575104
ACH-000865	KYSE450_OESOPHAGUS	Esophagus	chr5	1293428	1294781	TERT	5_1294086_C_T	52	13	11	8	65	19	CCLE_WGS	0.8	0.578947	4	1.375	0.34375	0.347899	0	0.0152882	0.00793388
ACH-000852	NCIH1435_LUNG	Lung	chr5	1293428	1294781	TERT	5_1294086_C_T	19	53	10	0	72	10	CCLE_WGS	0.263889	1	0.358491	inf	inf	57.6154	1	0.0152882	0.00793388
ACH-000848	JHH7_LIVER	Liver	chr5	1293428	1294781	TERT	5_1294086_C_T	34	50	38	0	84	38	CCLE_WGS	0.404762	1	0.68	inf	inf	112.71	1	0.0152882	0.00793388
ACH-000839	SCABER_URINARY_TRACT	Urinary tract	chr5	1253282	1253946	TERT	5_1253744_G_A	16	21	0	25	37	25	CCLE_WGS	0.432432	0	0.761905	0	0	0.0255496	1	-0.00562643
ACH-000838	AMO1_HAEMATOPOIETIC_AND_LYMPHOID_TISSUE	Plasma cell	chr5	1255402	1255526	TERT	5_1255520_G_A	27	20	191	191	47	382	CCLE_WES	0.574468	0.5	1.35	1	0.740741	0.745455	0	0.00300012	0.00495868
ACH-000832	CAL27_UPPER_AERODIGESTIVE_TRACT	Upper aerodigestive	chr5	1255402	1255526	TERT	5_1255520_G_A	22	19	1	8	41	9	CCLE_WGS	0.536585	0.111111	1.15789	0.125	0.107955	0.152941	1	0.00300012	0.00495868
ACH-000819	LN18_CENTRAL_NERVOUS_SYSTEM	Central nervous system	chr5	1253282	1253946	TERT	5_1253744_G_A	13	23	46	0	36	46	CCLE_WGS	0.361111	1	0.565217	inf	inf	161.889	1	-0.00562643
ACH-000817	RPMI8226_HAEMATOPOIETIC_AND_LYMPHOID_TISSUE	Plasma cell	chr5	1253282	1253946	TERT	5_1253744_G_A	30	27	61	0	57	61	CCLE_WGS	0.526316	1	1.11111	inf	inf	110.902	1	-0.00562643
ACH-000810	SKMEL30_SKIN	Skin	chr5	1253282	1253946	TERT	5_1253744_G_A	27	32	23	0	59	23	CCLE_WGS	0.457627	1	0.84375	inf	inf	55.5455	1	-0.00562643
ACH-000804	NB1_AUTONOMIC_GANGLIA	Peripheral nervous system	chr5	1255402	1255526	TERT	5_1255520_G_A	17	17	1	44	34	45	CCLE_WES	0.5	0.0222222	1	0.0227273	0.0227273	0.0337079	1	0.00300012	0.00495868
ACH-000803	COLO668_LUNG	Lung	chr5	1253282	1253946	TERT	5_1253744_G_A	32	23	17	21	55	38	CCLE_WGS	0.581818	0.447368	1.3913	0.809524	0.581845	0.588551	0	-0.00562643
ACH-000796	MCAS_OVARY	Ovary	chr5	1255402	1255526	TERT	5_1255520_G_A	44	36	0	15	80	15	CCLE_WES	0.55	0	1.22222	0	0	0.0264589	1	0.00300012	0.00495868
ACH-000790	SHP77_LUNG	Lung	chr5	1255402	1255526	TERT	5_1255520_G_A	61	39	16	29	100	45	CCLE_WGS	0.61	0.355556	1.5641	0.551724	0.352742	0.359239	0	0.00300012	0.00495868
ACH-000788	A2058_SKIN	Skin	chr5	1253282	1253946	TERT	5_1253918_C_T	22	18	119	2	40	121	CCLE_WGS	0.55	0.983471	1.22222	59.5	48.6818	39.3022	1	-0.00207996	0
ACH-000778	HSC3_UPPER_AERODIGESTIVE_TRACT	Upper aerodigestive	chr5	1255402	1255526	TERT	5_1255520_G_A	37	37	0	43	74	43	CCLE_WGS	0.5	0	1	0	0	0.0114943	1	0.00300012	0.00495868
ACH-000776	ONS76_CENTRAL_NERVOUS_SYSTEM	Central nervous system	chr5	1255402	1255526	TERT	5_1255520_G_A	38	40	1	34	78	35	CCLE_WGS	0.487179	0.0285714	0.95	0.0294118	0.0309598	0.0457369	1	0.00300012	0.00495868
ACH-000765	WM983B_SKIN	Skin	chr5	1255402	1255526	TERT	5_1255520_G_A	14	27	0	9	41	9	CCLE_WES	0.341463	0	0.518519	0	0	0.0998185	1	0.00300012	0.00495868
ACH-000763	MM1S_HAEMATOPOIETIC_AND_LYMPHOID_TISSUE	Plasma cell	chr5	1253282	1253946	TERT	5_1253681_C_T	29	19	3	41	48	44	CCLE_WGS	0.604167	0.0681818	1.52632	0.0731707	0.0479394	0.0557484	1	-0.000575104
ACH-000752	NCIH196_LUNG	Lung	chr5	1293428	1294781	TERT	5_1294086_C_T	77	54	13	0	131	13	CCLE_WGS	0.587786	1	1.42593	inf	inf	18.9871	1	0.0152882	0.00793388
ACH-000750	LOXIMVI_SKIN	Skin	chr5	1253282	1253946	TERT	5_1253744_G_A	15	21	0	44	36	44	CCLE_WGS	0.416667	0	0.714286	0	0	0.0155854	1	-0.00562643
ACH-000747	NCIH1703_LUNG	Lung	chr5	1293428	1294781	TERT	5_1294086_C_T	23	44	21	10	67	31	CCLE_WGS	0.343284	0.677419	0.522727	2.1	4.01739	3.87741	0	0.0152882	0.00793388
ACH-000746	GSS_STOMACH	Gastric	chr5	1255402	1255526	TERT	5_1255520_G_A	42	33	53	0	75	53	CCLE_WES	0.56	1	1.27273	inf	inf	84.3412	1	0.00300012	0.00495868
ACH-000739	HEPG2_LIVER	Liver	chr5	1293428	1294781	TERT	5_1294086_C_T	19	19	10	0	38	10	CCLE_WGS	0.5	1	1	inf	inf	21	1	0.0152882	0.00793388
ACH-000738	GB1_CENTRAL_NERVOUS_SYSTEM	Central nervous system	chr5	1255402	1255526	TERT	5_1255520_G_A	14	38	0	10	52	10	CCLE_WGS	0.269231	0	0.368421	0	0	0.126437	1	0.00300012	0.00495868
ACH-000736	SNU601_STOMACH	Gastric	chr5	1255402	1255526	TERT	5_1255520_G_A	37	36	1	7	73	8	CCLE_WES	0.506849	0.125	1.02778	0.142857	0.138996	0.194667	1	0.00300012	0.00495868
ACH-000735	PECAPJ49_UPPER_AERODIGESTIVE_TRACT	Upper aerodigestive	chr5	1255402	1255526	TERT	5_1255520_G_A	60	15	11	0	75	11	CCLE_WES	0.8	1	4	inf	inf	5.89256	1	0.00300012	0.00495868
ACH-000734	JHH5_LIVER	Liver	chr5	1255402	1255526	TERT	5_1255520_G_A	46	14	105	1	60	106	CCLE_WES	0.766667	0.990566	3.28571	105	31.9565	21.9319	1	0.00300012	0.00495868
ACH-000729	NCIH1963_LUNG	Lung	chr5	1253282	1253946	TERT	5_1253744_G_A	23	16	17	3	39	20	CCLE_WGS	0.589744	0.85	1.4375	5.66667	3.94203	3.51064	0	-0.00562643
ACH-000728	KASUMI2_HAEMATOPOIETIC_AND_LYMPHOID_TISSUE	Blood	chr5	1255402	1255526	TERT	5_1255520_G_A	18	13	85	82	31	167	CCLE_WES	0.580645	0.508982	1.38462	1.03659	0.748645	0.756265	0	0.00300012	0.00495868
ACH-000727	NCIH2066_LUNG	Lung	chr5	1255402	1255526	TERT	5_1255520_G_A	70	34	20	3	104	23	CCLE_WGS	0.673077	0.869565	2.05882	6.66667	3.2381	2.86626	0	0.00300012	0.00495868
ACH-000725	HCC202_BREAST	Breast	chr5	1253282	1253946	TERT	5_1253744_G_A	23	17	8	1	40	9	CCLE_WGS	0.575	0.888889	1.35294	8	5.91304	4.21986	0	-0.00562643
ACH-000724	HT1376_URINARY_TRACT	Urinary tract	chr5	1293428	1294781	TERT	5_1294086_C_T	35	14	0	17	49	17	CCLE_WGS	0.714286	0	2.5	0	0	0.01167	1	0.0152882	0.00793388
ACH-000719	RMGI_OVARY	Ovary	chr5	1255402	1255526	TERT	5_1255520_G_A	21	17	9	0	38	9	CCLE_WGS	0.552632	1	1.23529	inf	inf	15.4651	1	0.00300012	0.00495868
ACH-000714	KMS11_HAEMATOPOIETIC_AND_LYMPHOID_TISSUE	Plasma cell	chr5	1293428	1294781	TERT	5_1294086_C_T	15	26	11	0	41	11	CCLE_WGS	0.365854	1	0.576923	inf	inf	39.3226	1	0.0152882	0.00793388
ACH-000705	LC1F_LUNG	Lung	chr5	1255402	1255526	TERT	5_1255520_G_A	39	22	9	2	61	11	CCLE_WGS	0.639344	0.818182	1.77273	4.5	2.53846	2.16456	0	0.00300012	0.00495868
ACH-000701	RMUGS_OVARY	Ovary	chr5	1255402	1255526	TERT	5_1255520_G_A	24	18	29	0	42	29	CCLE_WES	0.571429	1	1.33333	inf	inf	44.551	1	0.00300012	0.00495868
ACH-000698	DMS53_LUNG	Lung	chr5	1293428	1294781	TERT	5_1294665_G_C	26	18	27	3	44	30	CCLE_WGS	0.590909	0.9	1.44444	9	6.23077	5.48518	1	-0.000575104
ACH-000682	SNU1066_UPPER_AERODIGESTIVE_TRACT	Upper aerodigestive	chr5	1293428	1294781	TERT	5_1294086_C_T	11	19	0	15	30	15	CCLE_WES	0.366667	0	0.578947	0	0	0.0546985	1	0.0152882	0.00793388
ACH-000681	A549_LUNG	Lung	chr5	1253282	1253946	TERT	5_1253744_G_A	48	21	10	7	69	17	CCLE_WGS	0.695652	0.588235	2.28571	1.42857	0.625	0.620619	0	-0.00562643
ACH-000668	HCC70_BREAST	Breast	chr5	1253282	1253946	TERT	5_1253744_G_A	13	109	0	25	122	25	CCLE_WGS	0.106557	0	0.119266	0	0	0.159041	1	-0.00562643
ACH-000667	HCC44_LUNG	Lung	chr5	1254483	1254620	TERT	5_1254594_C_T	67	94	2	38	161	40	CCLE_WGS	0.416149	0.05	0.712766	0.0526316	0.0738413	0.0909091	1	-0.00323017	-0.00231405
ACH-000666	NCIH1355_LUNG	Lung	chr5	1255402	1255526	TERT	5_1255520_G_A	17	31	35	20	48	55	CCLE_WGS	0.354167	0.636364	0.548387	1.75	3.19118	3.11707	0	0.00300012	0.00495868
ACH-000657	A2780_OVARY	Ovary	chr5	1253282	1253946	TERT	5_1253780_G_A	22	22	20	18	44	38	CCLE_WGS	0.5	0.526316	1	1.11111	1.11111	1.10811	0	-0.00115021
ACH-000636	RPMI8402_HAEMATOPOIETIC_AND_LYMPHOID_TISSUE	Blood	chr5	1280273	1280453	TERT	5_1280411_T_C	35	29	1	53	64	54	CCLE_WES	0.546875	0.0185185	1.2069	0.0188679	0.0156334	0.0232987	1		-0.00115702
ACH-000633	FU97_STOMACH	Gastric	chr5	1279406	1279585	TERT	5_1279439_G_A	14	100	5	26	114	31	CCLE_WGS	0.122807	0.16129	0.14	0.192308	1.37363	1.43852	0	0.00079556
ACH-000604	KYO1_HAEMATOPOIETIC_AND_LYMPHOID_TISSUE	Blood	chr5	1255402	1255526	TERT	5_1255520_G_A	18	21	0	14	39	14	CCLE_WES	0.461538	0	0.857143	0	0	0.0400746	1	0.00300012	0.00495868
ACH-000601	MIAPACA2_PANCREAS	Pancreas	chr5	1255402	1255526	TERT	5_1255520_G_A	27	12	15	0	39	15	CCLE_WGS	0.692308	1	2.25	inf	inf	14.0909	1	0.00300012	0.00495868
ACH-000598	KMS21BM_HAEMATOPOIETIC_AND_LYMPHOID_TISSUE	Plasma cell	chr5	1255402	1255526	TERT	5_1255520_G_A	25	21	216	173	46	389	CCLE_WES	0.543478	0.55527	1.19048	1.24855	1.04879	1.0521	0	0.00300012	0.00495868
ACH-000590	NCIH2073_LUNG	Lung	chr5	1255402	1255526	TERT	5_1255520_G_A	75	10	18	2	85	20	CCLE_WES	0.882353	0.9	7.5	9	1.2	1.02914	0	0.00300012	0.00495868
ACH-000579	UACC257_SKIN	Skin	chr5	1253282	1253946	TERT	5_1253744_G_A	15	21	0	28	36	28	CCLE_WGS	0.416667	0	0.714286	0	0	0.024335	1	-0.00562643
ACH-000576	KMS27_HAEMATOPOIETIC_AND_LYMPHOID_TISSUE	Plasma cell	chr5	1255402	1255526	TERT	5_1255520_G_A	17	26	0	62	43	62	CCLE_WES	0.395349	0	0.653846	0	0	0.0121143	1	0.00300012	0.00495868
ACH-000559	NCIH1836_LUNG	Lung	chr5	1253282	1253946	TERT	5_1253744_G_A	17	23	28	6	40	34	CCLE_WGS	0.425	0.823529	0.73913	4.66667	6.31373	5.88791	1	-0.00562643
ACH-000546	HSC4_UPPER_AERODIGESTIVE_TRACT	Upper aerodigestive	chr5	1255402	1255526	TERT	5_1255520_G_A	19	19	1	15	38	16	CCLE_WES	0.5	0.0625	1	0.0666667	0.0666667	0.0967742	1	0.00300012	0.00495868
ACH-000543	SNU489_CENTRAL_NERVOUS_SYSTEM	Central nervous system	chr5	1255402	1255526	TERT	5_1255520_G_A	25	27	9	0	52	9	CCLE_WES	0.480769	1	0.925926	inf	inf	20.4902	1	0.00300012	0.00495868
ACH-000538	HUTU80_SMALL_INTESTINE	Gastric	chr5	1253282	1253946	TERT	5_1253744_G_A	18	13	41	39	31	80	CCLE_WGS	0.580645	0.5125	1.38462	1.05128	0.759259	0.766678	0	-0.00562643
ACH-000532	SNU61_LARGE_INTESTINE	Colorectal	chr5	1255402	1255526	TERT	5_1255520_G_A	30	13	13	0	43	13	CCLE_WES	0.697674	1	2.30769	inf	inf	11.9508	1	0.00300012	0.00495868
ACH-000530	DMS114_LUNG	Lung	chr5	1253282	1253946	TERT	5_1253744_G_A	24	11	49	26	35	75	CCLE_WGS	0.685714	0.653333	2.18182	1.88462	0.863782	0.876781	0	-0.00562643
ACH-000528	ABC1_LUNG	Lung	chr5	1255402	1255526	TERT	5_1255520_G_A	84	44	10	0	128	10	CCLE_WGS	0.65625	1	1.90909	inf	inf	11.0592	1	0.00300012	0.00495868
ACH-000525	NCIH2171_LUNG	Lung	chr5	1255402	1255526	TERT	5_1255520_G_A	40	26	12	4	66	16	CCLE_WGS	0.606061	0.75	1.53846	3	1.95	1.81756	0	0.00300012	0.00495868
ACH-000521	NCIH2030_LUNG	Lung	chr5	1253282	1253946	TERT	5_1253744_G_A	30	20	14	5	50	19	CCLE_WGS	0.6	0.736842	1.5	2.8	1.86667	1.77198	0	-0.00562643
ACH-000519	PEER_HAEMATOPOIETIC_AND_LYMPHOID_TISSUE	Blood	chr5	1255402	1255526	TERT	5_1255520_G_A	18	18	69	94	36	163	CCLE_WES	0.5	0.423313	1	0.734043	0.734043	0.73545	0	0.00300012	0.00495868
ACH-000515	HCC33_LUNG	Lung	chr5	1253282	1253946	TERT	5_1253744_G_A	26	9	24	13	35	37	CCLE_WGS	0.742857	0.648649	2.88889	1.84615	0.639053	0.650594	0	-0.00562643
ACH-000507	KE39_STOMACH	Gastric	chr5	1255402	1255526	TERT	5_1255520_G_A	23	38	0	15	61	15	CCLE_WES	0.377049	0	0.605263	0	0	0.0528483	1	0.00300012	0.00495868
ACH-000506	NCIH146_LUNG	Lung	chr5	1253282	1253946	TERT	5_1253918_C_T	11	47	2	24	58	26	CCLE_WGS	0.189655	0.0769231	0.234043	0.0833333	0.356061	0.421473	0	-0.00207996	0
ACH-000500	SNU46_UPPER_AERODIGESTIVE_TRACT	Upper aerodigestive	chr5	1255402	1255526	TERT	5_1255520_G_A	20	37	10	2	57	12	CCLE_WES	0.350877	0.833333	0.540541	5	9.25	7.68293	1	0.00300012	0.00495868
ACH-000496	NCIH1792_LUNG	Lung	chr5	1253282	1253946	TERT	5_1253744_G_A	25	13	26	11	38	37	CCLE_WGS	0.657895	0.702703	1.92308	2.36364	1.22909	1.21995	0	-0.00562643
ACH-000486	KU1919_URINARY_TRACT	Urinary tract	chr5	1293428	1294781	TERT	5_1294328_C_T	19	22	8	3	41	11	CCLE_WGS	0.463415	0.727273	0.863636	2.66667	3.08772	2.8022	0	-0.000575104
ACH-000481	NCIH2170_LUNG	Lung	chr5	1293428	1294781	TERT	5_1294086_C_T	33	22	8	1	55	9	CCLE_WGS	0.6	0.888889	1.5	8	5.33333	3.80597	0	0.0152882	0.00793388
ACH-000479	KNS81_CENTRAL_NERVOUS_SYSTEM	Central nervous system	chr5	1255402	1255526	TERT	5_1255520_G_A	16	19	9	0	35	9	CCLE_WGS	0.457143	1	0.842105	inf	inf	22.4545	1	0.00300012	0.00495868
ACH-000475	HUH1_LIVER	Liver	chr5	1255402	1255526	TERT	5_1255520_G_A	27	32	60	0	59	60	CCLE_WES	0.457627	1	0.84375	inf	inf	143	1	0.00300012	0.00495868
ACH-000473	RT112_URINARY_TRACT	Urinary tract	chr5	1255402	1255526	TERT	5_1255520_G_A	15	24	26	0	39	26	CCLE_WGS	0.384615	1	0.625	inf	inf	83.7742	1	0.00300012	0.00495868
ACH-000463	NCIH460_LUNG	Lung	chr5	1253282	1253946	TERT	5_1253744_G_A	29	23	32	6	52	38	CCLE_WGS	0.557692	0.842105	1.26087	5.33333	4.22989	3.98305	0	-0.00562643
ACH-000462	NALM1_HAEMATOPOIETIC_AND_LYMPHOID_TISSUE	Blood	chr5	1282544	1282739	TERT	5_1282654_G_A	37	36	99	0	73	99	CCLE_WES	0.506849	1	1.02778	inf	inf	193.693	1		-0.00115702
ACH-000444	LU99_LUNG	Lung	chr5	1293428	1294781	TERT	5_1294086_C_T	17	29	1	8	46	9	CCLE_WGS	0.369565	0.111111	0.586207	0.125	0.213235	0.297479	0	0.0152882	0.00793388
ACH-000427	NCIN87_STOMACH	Gastric	chr5	1253282	1253946	TERT	5_1253780_G_A	20	22	0	18	42	18	CCLE_WGS	0.47619	0	0.909091	0	0	0.0296638	1	-0.00115021
ACH-000422	SNU475_LIVER	Liver	chr5	1293428	1294781	TERT	5_1294086_C_T	13	33	0	10	46	10	CCLE_WGS	0.282609	0	0.393939	0	0	0.118166	1	0.0152882	0.00793388
ACH-000420	SNU449_LIVER	Liver	chr5	1255402	1255526	TERT	5_1255520_G_A	14	18	6	9	32	15	CCLE_WGS	0.4375	0.4	0.777778	0.666667	0.857143	0.872958	0	0.00300012	0.00495868
ACH-000409	OVSAHO_OVARY	Ovary	chr5	1253282	1253946	TERT	5_1253591_G_A	34	28	5	4	62	9	CCLE_WGS	0.548387	0.555556	1.21429	1.25	1.02941	1.00966	0	-0.000575104
ACH-000407	SNU685_ENDOMETRIUM	Uterus	chr5	1255402	1255526	TERT	5_1255520_G_A	23	46	26	0	69	26	CCLE_WES	0.333333	1	0.5	inf	inf	104.872	1	0.00300012	0.00495868
ACH-000400	SKCO1_LARGE_INTESTINE	Colorectal	chr5	1255402	1255526	TERT	5_1255520_G_A	48	19	4	5	67	9	CCLE_WES	0.716418	0.444444	2.52632	0.8	0.316667	0.32896	0	0.00300012	0.00495868
ACH-000388	NUDHL1_HAEMATOPOIETIC_AND_LYMPHOID_TISSUE	Lymphocyte	chr5	1255402	1255526	TERT	5_1255520_G_A	61	19	0	18	80	18	CCLE_WES	0.7625	0	3.21053	0	0	0.00856955	1	0.00300012	0.00495868
ACH-000387	TF1_HAEMATOPOIETIC_AND_LYMPHOID_TISSUE	Blood	chr5	1255402	1255526	TERT	5_1255520_G_A	17	33	0	53	50	53	CCLE_WES	0.34	0	0.515152	0	0	0.0178905	1	0.00300012	0.00495868
ACH-000377	SNU478_BILIARY_TRACT	Bile duct	chr5	1255402	1255526	TERT	5_1255520_G_A	55	28	12	2	83	14	CCLE_WES	0.662651	0.857143	1.96429	6	3.05455	2.56757	0	0.00300012	0.00495868
ACH-000376	SF295_CENTRAL_NERVOUS_SYSTEM	Central nervous system	chr5	1255402	1255526	TERT	5_1255520_G_A	26	27	19	0	53	19	CCLE_WGS	0.490566	1	0.962963	inf	inf	40.4717	1	0.00300012	0.00495868
ACH-000375	G402_SOFT_TISSUE	Soft tissue	chr5	1293428	1294781	TERT	5_1294086_C_T	16	20	7	2	36	9	CCLE_WGS	0.444444	0.777778	0.8	3.5	4.375	3.72727	0	0.0152882	0.00793388
ACH-000362	MOLM13_HAEMATOPOIETIC_AND_LYMPHOID_TISSUE	Blood	chr5	1255402	1255526	TERT	5_1255520_G_A	21	20	0	35	41	35	CCLE_WES	0.512195	0	1.05	0	0	0.0134294	1	0.00300012	0.00495868
ACH-000361	SKHEP1_LIVER	Liver	chr5	1293428	1294781	TERT	5_1294086_C_T	30	16	4	4	46	8	CCLE_WGS	0.652174	0.5	1.875	1	0.533333	0.540984	0	0.0152882	0.00793388
ACH-000358	NCIH69_LUNG	Lung	chr5	1253282	1253946	TERT	5_1253744_G_A	31	23	15	11	54	26	CCLE_WGS	0.574074	0.576923	1.34783	1.36364	1.01173	1.00552	0	-0.00562643
ACH-000356	MKN45_STOMACH	Gastric	chr5	1293428	1294781	TERT	5_1294086_C_T	28	46	7	11	74	18	CCLE_WGS	0.378378	0.388889	0.608696	0.636364	1.04545	1.06407	0	0.0152882	0.00793388
ACH-000334	DB_HAEMATOPOIETIC_AND_LYMPHOID_TISSUE	Lymphocyte	chr5	1293428	1294781	TERT	5_1294086_C_T	23	27	6	6	50	12	CCLE_WGS	0.46	0.5	0.851852	1	1.17391	1.17021	0	0.0152882	0.00793388
ACH-000326	JURLMK1_HAEMATOPOIETIC_AND_LYMPHOID_TISSUE	Blood	chr5	1255402	1255526	TERT	5_1255520_G_A	23	19	8	17	42	25	CCLE_WES	0.547619	0.32	1.21053	0.470588	0.388747	0.40304	0	0.00300012	0.00495868
ACH-000324	JHOC5_OVARY	Ovary	chr5	1255402	1255526	TERT	5_1255520_G_A	21	29	16	0	50	16	CCLE_WES	0.42	1	0.724138	inf	inf	45.2791	1	0.00300012	0.00495868
ACH-000321	MOLM6_HAEMATOPOIETIC_AND_LYMPHOID_TISSUE	Blood	chr5	1255402	1255526	TERT	5_1255520_G_A	21	19	31	23	40	54	CCLE_WES	0.525	0.574074	1.10526	1.34783	1.21946	1.21573	0	0.00300012	0.00495868
ACH-000311	NCIH2122_LUNG	Lung	chr5	1255402	1255526	TERT	5_1255520_G_A	30	40	0	8	70	8	CCLE_WGS	0.428571	0	0.75	0	0	0.0781099	1	0.00300012	0.00495868
ACH-000308	EFO21_OVARY	Ovary	chr5	1253282	1253946	TERT	5_1253918_C_T	11	65	4	16	76	20	CCLE_WGS	0.144737	0.2	0.169231	0.25	1.47727	1.55336	0	-0.00207996	0
ACH-000302	SNU1077_ENDOMETRIUM	Uterus	chr5	1278756	1278911	TERT	5_1278814_C_T	496	45	10	0	541	10	CCLE_WES	0.916821	1	11.0222	inf	inf	1.92447	0		0
ACH-000297	NCIH889_LUNG	Lung	chr5	1254483	1254620	TERT	5_1254594_C_T	27	49	11	15	76	26	CCLE_WGS	0.355263	0.423077	0.55102	0.733333	1.33086	1.33548	0	-0.00323017	-0.00231405
ACH-000290	NCIH209_LUNG	Lung	chr5	1293428	1294781	TERT	5_1294166_C_T	15	41	12	15	56	27	CCLE_WGS	0.267857	0.444444	0.365854	0.8	2.18667	2.15921	0	0.00216622
ACH-000270	HPAC_PANCREAS	Pancreas	chr5	1255402	1255526	TERT	5_1255520_G_A	56	41	23	1	97	24	CCLE_WGS	0.57732	0.958333	1.36585	23	16.8393	11.5074	1	0.00300012	0.00495868
ACH-000249	CL11_LARGE_INTESTINE	Colorectal	chr5	1255402	1255526	TERT	5_1255520_G_A	9	15	1	12	24	13	CCLE_WES	0.375	0.0769231	0.6	0.0833333	0.138889	0.195789	1	0.00300012	0.00495868
ACH-000247	OCUM1_STOMACH	Gastric	chr5	1280273	1280453	TERT	5_1280381_G_A	12	20	9	7	32	16	CCLE_WGS	0.375	0.5625	0.6	1.28571	2.14286	2.07733	0	-0.000575104
ACH-000220	MINO_HAEMATOPOIETIC_AND_LYMPHOID_TISSUE	Lymphocyte	chr5	1254483	1254620	TERT	5_1254594_C_T	28	10	103	129	38	232	CCLE_WES	0.736842	0.443966	2.8	0.79845	0.285161	0.294452	0	-0.00323017	-0.00231405
ACH-000219	A375_SKIN	Skin	chr5	1282544	1282739	TERT	5_1282588_G_A	17	23	0	12	40	12	CCLE_WGS	0.425	0	0.73913	0	0	0.0537143	1	0.00252087
ACH-000211	DAOY_CENTRAL_NERVOUS_SYSTEM	Central nervous system	chr5	1260589	1260715	TERT	5_1260644_C_T	22	15	65	0	37	65	CCLE_WGS	0.594595	1	1.46667	inf	inf	90.2444	1	0.00252087
ACH-000210	CADOES1_BONE	Bone	chr5	1255402	1255526	TERT	5_1255520_G_A	17	20	11	5	37	16	CCLE_WES	0.459459	0.6875	0.85	2.2	2.58824	2.44935	0	0.00300012	0.00495868
ACH-000187	CORL311_LUNG	Lung	chr5	1253282	1253946	TERT	5_1253744_G_A	25	268	0	244	293	244	CCLE_WGS	0.0853242	0	0.0932836	0	0	0.0215325	1	-0.00562643
ACH-000179	NCIH1618_LUNG	Lung	chr5	1253282	1253946	TERT	5_1253744_G_A	42	22	5	4	64	9	CCLE_WGS	0.65625	0.555556	1.90909	1.25	0.654762	0.647059	0	-0.00562643
ACH-000159	OSRC2_KIDNEY	Kidney	chr5	1293428	1294781	TERT	5_1294086_C_T	63	11	34	0	74	34	CCLE_WGS	0.851351	1	5.72727	inf	inf	12.4961	1	0.0152882	0.00793388
ACH-000151	JM1_HAEMATOPOIETIC_AND_LYMPHOID_TISSUE	Blood	chr5	1253282	1253946	TERT	5_1253918_C_T	23	8	51	25	31	76	CCLE_WES	0.741935	0.671053	2.875	2.04	0.709565	0.730496	0	-0.00207996	0
ACH-000146	THP1_HAEMATOPOIETIC_AND_LYMPHOID_TISSUE	Blood	chr5	1255402	1255526	TERT	5_1255520_G_A	17	24	1	26	41	27	CCLE_WGS	0.414634	0.037037	0.708333	0.0384615	0.0542986	0.0792453	1	0.00300012	0.00495868
ACH-000140	PFEIFFER_HAEMATOPOIETIC_AND_LYMPHOID_TISSUE	Lymphocyte	chr5	1264519	1264707	TERT	5_1264587_G_A	36	20	33	13	56	46	CCLE_WES	0.642857	0.717391	1.8	2.53846	1.41026	1.39371	0		0
ACH-000130	NALM19_HAEMATOPOIETIC_AND_LYMPHOID_TISSUE	Blood	chr5	1255402	1255526	TERT	5_1255520_G_A	46	17	0	81	63	81	CCLE_WES	0.730159	0	2.70588	0	0	0.00230886	1	0.00300012	0.00495868
ACH-000098	GAMG_CENTRAL_NERVOUS_SYSTEM	Central nervous system	chr5	1255402	1255526	TERT	5_1255520_G_A	39	28	18	0	67	18	CCLE_WGS	0.58209	1	1.39286	inf	inf	26.6962	1	0.00300012	0.00495868
ACH-000093	PANC0504_PANCREAS	Pancreas	chr5	1255402	1255526	TERT	5_1255520_G_A	15	17	1	10	32	11	CCLE_WES	0.46875	0.0909091	0.882353	0.1	0.113333	0.16129	1	0.00300012	0.00495868
ACH-000069	HS611T_HAEMATOPOIETIC_AND_LYMPHOID_TISSUE	Lymphocyte	chr5	1255402	1255526	TERT	5_1255520_G_A	22	20	18	4	42	22	CCLE_WES	0.52381	0.818182	1.1	4.5	4.09091	3.74568	0	0.00300012	0.00495868
ACH-000068	REC1_HAEMATOPOIETIC_AND_LYMPHOID_TISSUE	Lymphocyte	chr5	1253282	1253946	TERT	5_1253744_G_A	23	21	30	28	44	58	CCLE_WGS	0.522727	0.517241	1.09524	1.07143	0.978261	0.979097	0	-0.00562643
ACH-000060	PANC1005_PANCREAS	Pancreas	chr5	1278756	1278911	TERT	5_1278852_G_A	18	14	11	0	32	11	CCLE_WGS	0.5625	1	1.28571	inf	inf	18.027	1	-0.000575104
ACH-000051	TE617T_SOFT_TISSUE	Soft tissue	chr5	1255402	1255526	TERT	5_1255520_G_A	30	27	15	18	57	33	CCLE_WES	0.526316	0.454545	1.11111	0.833333	0.75	0.755428	0	0.00300012	0.00495868
ACH-000047	GCIY_STOMACH	Gastric	chr5	1293428	1294781	TERT	5_1294086_C_T	24	12	8	0	36	8	CCLE_WGS	0.666667	1	2	inf	inf	8.67347	1	0.0152882	0.00793388
ACH-000045	MV411_HAEMATOPOIETIC_AND_LYMPHOID_TISSUE	Blood	chr5	1255402	1255526	TERT	5_1255520_G_A	13	11	0	23	24	23	CCLE_WGS	0.541667	0	1.18182	0	0	0.0181245	1	0.00300012	0.00495868
ACH-000023	PATU8988T_PANCREAS	Pancreas	chr5	1254483	1254620	TERT	5_1254594_C_T	15	35	0	14	50	14	CCLE_WGS	0.3	0	0.428571	0	0	0.0789766	1	-0.00323017	-0.00231405
ACH-000021	NCIH1693_LUNG	Lung	chr5	1253282	1253946	TERT	5_1253744_G_A	21	33	5	22	54	27	CCLE_WGS	0.388889	0.185185	0.636364	0.227273	0.357143	0.380879	0	-0.00562643
ACH-000018	T24_URINARY_TRACT	Urinary tract	chr5	1293428	1294781	TERT	5_1294086_C_T	31	17	12	0	48	12	CCLE_WGS	0.645833	1	1.82353	inf	inf	13.8889	1	0.0152882	0.00793388
ACH-000009	C2BBE1_LARGE_INTESTINE	Colorectal	chr5	1255402	1255526	TERT	5_1255520_G_A	40	16	16	2	56	18	CCLE_WGS	0.714286	0.888889	2.5	8	3.2	2.68889	0	0.00300012	0.00495868
ACH-000007	LS513_LARGE_INTESTINE	Colorectal	chr5	1293428	1294781	TERT	5_1294086_C_T	18	9	30	0	27	30	CCLE_WGS	0.666667	1	2	inf	inf	31.3243	1	0.0152882	0.00793388

## Sheet: SLC6A19_SNP_counts
Supplementary Table S4c: SNP read counts for SLC6A19
SNP-level allele-specific estimates for SLC6A19
	Achilles_ID	CCLE_name	Disease	Exon_chromosome	Exon_start	Exon_end	Gene_name	SNP	DNA_ref_count	DNA_alt_count	RNA_ref_count	RNA_alt_count	DNA_total_count	RNA_total_count	DNA_source	DNA_ref_frac	RNA_ref_frac	DNA_ratio	RNA_ratio	RNA_DNA_foldchange	RNA_DNA_foldchange_pseudo	MAE
0	ACH-000001	NIHOVCAR3_OVARY	Ovary	chr5	1221816	1225232	SLC6A19	5_1224003_C_T	21	15			36		CCLE_WGS	0.583333		1.4
1	ACH-000001	NIHOVCAR3_OVARY	Ovary	chr5	1213578	1213688	SLC6A19	5_1213668_G_A	19	22			41		CCLE_WGS	0.463415		0.863636
2	ACH-000001	NIHOVCAR3_OVARY	Ovary	chr5	1216673	1217060	SLC6A19	5_1216900_G_A	16	12			28		CCLE_WGS	0.571429		1.33333
3	ACH-000001	NIHOVCAR3_OVARY	Ovary	chr5	1221816	1225232	SLC6A19	5_1222499_T_C	24	35			59		CCLE_WGS	0.40678		0.685714
4	ACH-000001	NIHOVCAR3_OVARY	Ovary	chr5	1221816	1225232	SLC6A19	5_1223730_G_A	34	23			57		CCLE_WGS	0.596491		1.47826
5	ACH-000001	NIHOVCAR3_OVARY	Ovary	chr5	1221816	1225232	SLC6A19	5_1223835_T_C	28	27			55		CCLE_WGS	0.509091		1.03704
6	ACH-000001	NIHOVCAR3_OVARY	Ovary	chr5	1221816	1225232	SLC6A19	5_1223845_A_G	27	29			56		CCLE_WGS	0.482143		0.931034
7	ACH-000001	NIHOVCAR3_OVARY	Ovary	chr5	1221816	1225232	SLC6A19	5_1223940_A_G	29	20			49		CCLE_WGS	0.591837		1.45
8	ACH-000001	NIHOVCAR3_OVARY	Ovary	chr5	1221816	1225232	SLC6A19	5_1224001_T_C	18	15			33		CCLE_WGS	0.545455		1.2
9	ACH-000001	NIHOVCAR3_OVARY	Ovary	chr5	1221816	1225232	SLC6A19	5_1225121_C_T	27	27			54		CCLE_WGS	0.5		1
10	ACH-000001	NIHOVCAR3_OVARY	Ovary	chr5	1208861	1209001	SLC6A19	5_1208964_T_C	9	18			27		CCLE_WGS	0.333333		0.5
11	ACH-000005	HEL9217_HAEMATOPOIETIC_AND_LYMPHOID_TISSUE	Blood	chr5	1221816	1225232	SLC6A19	5_1223062_G_T	18	40	1	55	58	56	CCLE_WGS	0.310345	0.0178571	0.45	0.0181818	0.040404	0.0591673	1
12	ACH-000005	HEL9217_HAEMATOPOIETIC_AND_LYMPHOID_TISSUE	Blood	chr5	1221816	1225232	SLC6A19	5_1225043_C_T	18	32	0	15	50	15	CCLE_WGS	0.36	0	0.5625	0	0	0.0566696	1
13	ACH-000005	HEL9217_HAEMATOPOIETIC_AND_LYMPHOID_TISSUE	Blood	chr5	1221816	1225232	SLC6A19	5_1224405_A_G	17	41	1	54	58	55	CCLE_WGS	0.293103	0.0181818	0.414634	0.0185185	0.0446623	0.0652687	1
14	ACH-000005	HEL9217_HAEMATOPOIETIC_AND_LYMPHOID_TISSUE	Blood	chr5	1221816	1225232	SLC6A19	5_1224285_G_A	25	32	0	50	57	50	CCLE_WGS	0.438596	0	0.78125	0	0	0.0126189	1
15	ACH-000005	HEL9217_HAEMATOPOIETIC_AND_LYMPHOID_TISSUE	Blood	chr5	1221816	1225232	SLC6A19	5_1224174_T_C	21	48	2	98	69	100	CCLE_WGS	0.304348	0.02	0.4375	0.0204082	0.0466472	0.0572542	1
16	ACH-000005	HEL9217_HAEMATOPOIETIC_AND_LYMPHOID_TISSUE	Blood	chr5	1221816	1225232	SLC6A19	5_1224083_C_A	23	30	0	59	53	59	CCLE_WGS	0.433962	0	0.766667	0	0	0.0109065	1
17	ACH-000005	HEL9217_HAEMATOPOIETIC_AND_LYMPHOID_TISSUE	Blood	chr5	1221816	1225232	SLC6A19	5_1223940_A_G	50	16	177	1	66	178	CCLE_WGS	0.757576	0.994382	3.125	177	56.64	38.6634	1
18	ACH-000005	HEL9217_HAEMATOPOIETIC_AND_LYMPHOID_TISSUE	Blood	chr5	1221816	1225232	SLC6A19	5_1223835_T_C	48	22	147	7	70	154	CCLE_WGS	0.685714	0.954545	2.18182	21	9.625	9.12371	1
19	ACH-000005	HEL9217_HAEMATOPOIETIC_AND_LYMPHOID_TISSUE	Blood	chr5	1221816	1225232	SLC6A19	5_1223772_T_C	53	42	118	143	95	261	CCLE_WGS	0.557895	0.452107	1.2619	0.825175	0.653912	0.655997	0
20	ACH-000005	HEL9217_HAEMATOPOIETIC_AND_LYMPHOID_TISSUE	Blood	chr5	1221816	1225232	SLC6A19	5_1223700_C_T	53	17	198	7	70	205	CCLE_WGS	0.757143	0.965854	3.11765	28.2857	9.07278	8.65732	1
21	ACH-000005	HEL9217_HAEMATOPOIETIC_AND_LYMPHOID_TISSUE	Blood	chr5	1221816	1225232	SLC6A19	5_1222672_T_C	45	28	119	1	73	120	CCLE_WGS	0.616438	0.991667	1.60714	119	74.0444	49.9011	1
22	ACH-000005	HEL9217_HAEMATOPOIETIC_AND_LYMPHOID_TISSUE	Blood	chr5	1221816	1225232	SLC6A19	5_1225121_C_T	36	14	14	0	50	14	CCLE_WGS	0.72	1	2.57143	inf	inf	11.5205	1
23	ACH-000007	LS513_LARGE_INTESTINE	Colorectal	chr5	1213578	1213688	SLC6A19	5_1213668_G_A	11	21			32		CCLE_WGS	0.34375		0.52381
24	ACH-000007	LS513_LARGE_INTESTINE	Colorectal	chr5	1221816	1225232	SLC6A19	5_1222499_T_C	12	32			44		CCLE_WGS	0.272727		0.375
25	ACH-000007	LS513_LARGE_INTESTINE	Colorectal	chr5	1221816	1225232	SLC6A19	5_1224001_T_C	19	11			30		CCLE_WGS	0.633333		1.72727
26	ACH-000007	LS513_LARGE_INTESTINE	Colorectal	chr5	1221816	1225232	SLC6A19	5_1224003_C_T	21	11			32		CCLE_WGS	0.65625		1.90909
27	ACH-000007	LS513_LARGE_INTESTINE	Colorectal	chr5	1221816	1225232	SLC6A19	5_1223730_G_A	25	10			35		CCLE_WGS	0.714286		2.5
28	ACH-000007	LS513_LARGE_INTESTINE	Colorectal	chr5	1216673	1217060	SLC6A19	5_1216900_G_A	12	24			36		CCLE_WGS	0.333333		0.5
29	ACH-000007	LS513_LARGE_INTESTINE	Colorectal	chr5	1221816	1225232	SLC6A19	5_1223940_A_G	25	13			38		CCLE_WGS	0.657895		1.92308
30	ACH-000007	LS513_LARGE_INTESTINE	Colorectal	chr5	1221816	1225232	SLC6A19	5_1223835_T_C	31	8			39		CCLE_WGS	0.794872		3.875
31	ACH-000007	LS513_LARGE_INTESTINE	Colorectal	chr5	1221816	1225232	SLC6A19	5_1225121_C_T	23	13			36		CCLE_WGS	0.638889		1.76923
32	ACH-000007	LS513_LARGE_INTESTINE	Colorectal	chr5	1221816	1225232	SLC6A19	5_1223845_A_G	9	32			41		CCLE_WGS	0.219512		0.28125
33	ACH-000008	A101D_SKIN	Skin	chr5	1221816	1225232	SLC6A19	5_1224003_C_T	24	9			33		CCLE_WGS	0.727273		2.66667
34	ACH-000008	A101D_SKIN	Skin	chr5	1221816	1225232	SLC6A19	5_1224083_C_A	14	28			42		CCLE_WGS	0.333333		0.5
35	ACH-000008	A101D_SKIN	Skin	chr5	1216673	1217060	SLC6A19	5_1216833_G_A	12	29			41		CCLE_WGS	0.292683		0.413793
36	ACH-000008	A101D_SKIN	Skin	chr5	1221816	1225232	SLC6A19	5_1223772_T_C	35	21			56		CCLE_WGS	0.625		1.66667
37	ACH-000008	A101D_SKIN	Skin	chr5	1221816	1225232	SLC6A19	5_1223730_G_A	46	17			63		CCLE_WGS	0.730159		2.70588
38	ACH-000008	A101D_SKIN	Skin	chr5	1221816	1225232	SLC6A19	5_1223062_G_T	9	29			38		CCLE_WGS	0.236842		0.310345
39	ACH-000008	A101D_SKIN	Skin	chr5	1221816	1225232	SLC6A19	5_1223835_T_C	22	16			38		CCLE_WGS	0.578947		1.375
40	ACH-000008	A101D_SKIN	Skin	chr5	1221816	1225232	SLC6A19	5_1224174_T_C	18	24			42		CCLE_WGS	0.428571		0.75
41	ACH-000008	A101D_SKIN	Skin	chr5	1221816	1225232	SLC6A19	5_1224285_G_A	16	21			37		CCLE_WGS	0.432432		0.761905
42	ACH-000008	A101D_SKIN	Skin	chr5	1221816	1225232	SLC6A19	5_1224405_A_G	18	25			43		CCLE_WGS	0.418605		0.72
43	ACH-000008	A101D_SKIN	Skin	chr5	1221816	1225232	SLC6A19	5_1225121_C_T	29	20			49		CCLE_WGS	0.591837		1.45
44	ACH-000008	A101D_SKIN	Skin	chr5	1221816	1225232	SLC6A19	5_1223940_A_G	25	14			39		CCLE_WGS	0.641026		1.78571
45	ACH-000009	C2BBE1_LARGE_INTESTINE	Colorectal	chr5	1221816	1225232	SLC6A19	5_1222672_T_C	16	48			64		CCLE_WGS	0.25		0.333333
46	ACH-000009	C2BBE1_LARGE_INTESTINE	Colorectal	chr5	1213578	1213688	SLC6A19	5_1213668_G_A	20	15			35		CCLE_WGS	0.571429		1.33333
47	ACH-000011	253J_URINARY_TRACT	Urinary tract	chr5	1216673	1217060	SLC6A19	5_1216900_G_A	51	20			71		CCLE_WES	0.71831		2.55
48	ACH-000012	HCC827_LUNG	Lung	chr5	1216673	1217060	SLC6A19	5_1216900_G_A	15	10			25		CCLE_WGS	0.6		1.5
49	ACH-000012	HCC827_LUNG	Lung	chr5	1221816	1225232	SLC6A19	5_1223062_G_T	13	8			21		CCLE_WGS	0.619048		1.625
50	ACH-000012	HCC827_LUNG	Lung	chr5	1221816	1225232	SLC6A19	5_1223730_G_A	21	21			42		CCLE_WGS	0.5		1
51	ACH-000012	HCC827_LUNG	Lung	chr5	1221816	1225232	SLC6A19	5_1223772_T_C	36	8			44		CCLE_WGS	0.818182		4.5
52	ACH-000012	HCC827_LUNG	Lung	chr5	1221816	1225232	SLC6A19	5_1224083_C_A	27	8			35		CCLE_WGS	0.771429		3.375
53	ACH-000012	HCC827_LUNG	Lung	chr5	1221816	1225232	SLC6A19	5_1224285_G_A	21	13			34		CCLE_WGS	0.617647		1.61538
54	ACH-000012	HCC827_LUNG	Lung	chr5	1221816	1225232	SLC6A19	5_1225121_C_T	9	26			35		CCLE_WGS	0.257143		0.346154
55	ACH-000012	HCC827_LUNG	Lung	chr5	1221816	1225232	SLC6A19	5_1224405_A_G	19	13			32		CCLE_WGS	0.59375		1.46154
56	ACH-000013	ONCODG1_OVARY	Ovary	chr5	1208861	1209001	SLC6A19	5_1208964_T_C	42	46			88		CCLE_WES	0.477273		0.913043
57	ACH-000013	ONCODG1_OVARY	Ovary	chr5	1213578	1213688	SLC6A19	5_1213668_G_A	26	29			55		CCLE_WES	0.472727		0.896552
58	ACH-000013	ONCODG1_OVARY	Ovary	chr5	1216673	1217060	SLC6A19	5_1216900_G_A	48	88			136		CCLE_WES	0.352941		0.545455
59	ACH-000014	HS294T_SKIN	Skin	chr5	1221816	1225232	SLC6A19	5_1224405_A_G	32	31			63		CCLE_WGS	0.507937		1.03226
60	ACH-000014	HS294T_SKIN	Skin	chr5	1221816	1225232	SLC6A19	5_1225121_C_T	24	22			46		CCLE_WGS	0.521739		1.09091
61	ACH-000014	HS294T_SKIN	Skin	chr5	1221816	1225232	SLC6A19	5_1224285_G_A	14	20			34		CCLE_WGS	0.411765		0.7
62	ACH-000014	HS294T_SKIN	Skin	chr5	1221816	1225232	SLC6A19	5_1224174_T_C	28	18			46		CCLE_WGS	0.608696		1.55556
63	ACH-000014	HS294T_SKIN	Skin	chr5	1221816	1225232	SLC6A19	5_1223062_G_T	24	33			57		CCLE_WGS	0.421053		0.727273
64	ACH-000014	HS294T_SKIN	Skin	chr5	1216673	1217060	SLC6A19	5_1216833_G_A	28	13			41		CCLE_WGS	0.682927		2.15385
65	ACH-000014	HS294T_SKIN	Skin	chr5	1221816	1225232	SLC6A19	5_1224003_C_T	18	19			37		CCLE_WGS	0.486486		0.947368
66	ACH-000014	HS294T_SKIN	Skin	chr5	1221816	1225232	SLC6A19	5_1223940_A_G	26	20			46		CCLE_WGS	0.565217		1.3
67	ACH-000014	HS294T_SKIN	Skin	chr5	1221816	1225232	SLC6A19	5_1223835_T_C	22	24			46		CCLE_WGS	0.478261		0.916667
68	ACH-000014	HS294T_SKIN	Skin	chr5	1221816	1225232	SLC6A19	5_1223772_T_C	48	15			63		CCLE_WGS	0.761905		3.2
69	ACH-000014	HS294T_SKIN	Skin	chr5	1221816	1225232	SLC6A19	5_1223730_G_A	36	26			62		CCLE_WGS	0.580645		1.38462
70	ACH-000014	HS294T_SKIN	Skin	chr5	1221816	1225232	SLC6A19	5_1224083_C_A	25	17			42		CCLE_WGS	0.595238		1.47059
71	ACH-000018	T24_URINARY_TRACT	Urinary tract	chr5	1221816	1225232	SLC6A19	5_1223730_G_A	46	14			60		CCLE_WGS	0.766667		3.28571
72	ACH-000018	T24_URINARY_TRACT	Urinary tract	chr5	1221816	1225232	SLC6A19	5_1222499_T_C	16	37			53		CCLE_WGS	0.301887		0.432432
73	ACH-000018	T24_URINARY_TRACT	Urinary tract	chr5	1216673	1217060	SLC6A19	5_1216900_G_A	8	40			48		CCLE_WGS	0.166667		0.2
74	ACH-000018	T24_URINARY_TRACT	Urinary tract	chr5	1208861	1209001	SLC6A19	5_1208964_T_C	8	22			30		CCLE_WGS	0.266667		0.363636
75	ACH-000018	T24_URINARY_TRACT	Urinary tract	chr5	1221816	1225232	SLC6A19	5_1224001_T_C	44	11			55		CCLE_WGS	0.8		4
76	ACH-000018	T24_URINARY_TRACT	Urinary tract	chr5	1221816	1225232	SLC6A19	5_1223835_T_C	43	14			57		CCLE_WGS	0.754386		3.07143
77	ACH-000018	T24_URINARY_TRACT	Urinary tract	chr5	1221816	1225232	SLC6A19	5_1224003_C_T	45	10			55		CCLE_WGS	0.818182		4.5
78	ACH-000018	T24_URINARY_TRACT	Urinary tract	chr5	1221816	1225232	SLC6A19	5_1225121_C_T	38	23			61		CCLE_WGS	0.622951		1.65217
79	ACH-000018	T24_URINARY_TRACT	Urinary tract	chr5	1221816	1225232	SLC6A19	5_1223940_A_G	39	14			53		CCLE_WGS	0.735849		2.78571
80	ACH-000018	T24_URINARY_TRACT	Urinary tract	chr5	1221816	1225232	SLC6A19	5_1223845_A_G	18	38			56		CCLE_WGS	0.321429		0.473684
81	ACH-000019	MCF7_BREAST	Breast	chr5	1221816	1225232	SLC6A19	5_1224490_G_T	58	28			86		CCLE_WGS	0.674419		2.07143
82	ACH-000019	MCF7_BREAST	Breast	chr5	1221816	1225232	SLC6A19	5_1222499_T_C	62	27			89		CCLE_WGS	0.696629		2.2963
83	ACH-000019	MCF7_BREAST	Breast	chr5	1208861	1209001	SLC6A19	5_1208964_T_C	20	42			62		CCLE_WGS	0.322581		0.47619
84	ACH-000019	MCF7_BREAST	Breast	chr5	1221816	1225232	SLC6A19	5_1224795_G_C	61	33			94		CCLE_WGS	0.648936		1.84848
85	ACH-000019	MCF7_BREAST	Breast	chr5	1216673	1217060	SLC6A19	5_1216900_G_A	59	26			85		CCLE_WGS	0.694118		2.26923
86	ACH-000019	MCF7_BREAST	Breast	chr5	1216673	1217060	SLC6A19	5_1216775_A_G	57	22			79		CCLE_WGS	0.721519		2.59091
87	ACH-000019	MCF7_BREAST	Breast	chr5	1221816	1225232	SLC6A19	5_1223845_A_G	67	18			85		CCLE_WGS	0.788235		3.72222
88	ACH-000019	MCF7_BREAST	Breast	chr5	1221816	1225232	SLC6A19	5_1224051_C_T	51	18			69		CCLE_WGS	0.73913		2.83333
89	ACH-000021	NCIH1693_LUNG	Lung	chr5	1221816	1225232	SLC6A19	5_1224662_G_T	30	29			59		CCLE_WGS	0.508475		1.03448
90	ACH-000021	NCIH1693_LUNG	Lung	chr5	1221816	1225232	SLC6A19	5_1224661_G_T	30	29			59		CCLE_WGS	0.508475		1.03448
91	ACH-000021	NCIH1693_LUNG	Lung	chr5	1221816	1225232	SLC6A19	5_1222134_G_T	39	39			78		CCLE_WGS	0.5		1
92	ACH-000023	PATU8988T_PANCREAS	Pancreas	chr5	1213578	1213688	SLC6A19	5_1213668_G_A	21	15			36		CCLE_WGS	0.583333		1.4
93	ACH-000023	PATU8988T_PANCREAS	Pancreas	chr5	1208861	1209001	SLC6A19	5_1208964_T_C	21	16			37		CCLE_WGS	0.567568		1.3125
94	ACH-000024	OPM2_HAEMATOPOIETIC_AND_LYMPHOID_TISSUE	Plasma cell	chr5	1213578	1213688	SLC6A19	5_1213668_G_A	14	14			28		CCLE_WGS	0.5		1
95	ACH-000024	OPM2_HAEMATOPOIETIC_AND_LYMPHOID_TISSUE	Plasma cell	chr5	1221816	1225232	SLC6A19	5_1223700_C_T	34	18			52		CCLE_WGS	0.653846		1.88889
96	ACH-000024	OPM2_HAEMATOPOIETIC_AND_LYMPHOID_TISSUE	Plasma cell	chr5	1221816	1225232	SLC6A19	5_1223730_G_A	9	28			37		CCLE_WGS	0.243243		0.321429
97	ACH-000024	OPM2_HAEMATOPOIETIC_AND_LYMPHOID_TISSUE	Plasma cell	chr5	1208861	1209001	SLC6A19	5_1208964_T_C	10	8			18		CCLE_WGS	0.555556		1.25
98	ACH-000026	253JBV_URINARY_TRACT	Urinary tract	chr5	1208861	1209001	SLC6A19	5_1208964_T_C	20	50			70		CCLE_WES	0.285714		0.4
99	ACH-000026	253JBV_URINARY_TRACT	Urinary tract	chr5	1216673	1217060	SLC6A19	5_1216900_G_A	81	41			122		CCLE_WES	0.663934		1.97561
100	ACH-000027	GOS3_CENTRAL_NERVOUS_SYSTEM	Central nervous system	chr5	1216673	1217060	SLC6A19	5_1216900_G_A	39	41			80		CCLE_WES	0.4875		0.95122
101	ACH-000030	PC14_LUNG	Lung	chr5	1221816	1225232	SLC6A19	5_1223772_T_C	120	133			253		CCLE_WGS	0.474308		0.902256
102	ACH-000035	NCIH1650_LUNG	Lung	chr5	1221816	1225232	SLC6A19	5_1223730_G_A	23	76			99		CCLE_WGS	0.232323		0.302632
103	ACH-000035	NCIH1650_LUNG	Lung	chr5	1221816	1225232	SLC6A19	5_1222499_T_C	83	30			113		CCLE_WGS	0.734513		2.76667
104	ACH-000035	NCIH1650_LUNG	Lung	chr5	1216673	1217060	SLC6A19	5_1216900_G_A	78	23			101		CCLE_WGS	0.772277		3.3913
105	ACH-000035	NCIH1650_LUNG	Lung	chr5	1208861	1209001	SLC6A19	5_1208964_T_C	10	40			50		CCLE_WGS	0.2		0.25
106	ACH-000035	NCIH1650_LUNG	Lung	chr5	1221816	1225232	SLC6A19	5_1223940_A_G	14	48			62		CCLE_WGS	0.225806		0.291667
107	ACH-000035	NCIH1650_LUNG	Lung	chr5	1221816	1225232	SLC6A19	5_1223845_A_G	66	25			91		CCLE_WGS	0.725275		2.64
108	ACH-000035	NCIH1650_LUNG	Lung	chr5	1221816	1225232	SLC6A19	5_1224001_T_C	18	23			41		CCLE_WGS	0.439024		0.782609
109	ACH-000035	NCIH1650_LUNG	Lung	chr5	1221816	1225232	SLC6A19	5_1223835_T_C	24	64			88		CCLE_WGS	0.272727		0.375
110	ACH-000035	NCIH1650_LUNG	Lung	chr5	1221816	1225232	SLC6A19	5_1225121_C_T	19	67			86		CCLE_WGS	0.22093		0.283582
111	ACH-000035	NCIH1650_LUNG	Lung	chr5	1221816	1225232	SLC6A19	5_1224003_C_T	18	24			42		CCLE_WGS	0.428571		0.75
112	ACH-000045	MV411_HAEMATOPOIETIC_AND_LYMPHOID_TISSUE	Blood	chr5	1221816	1225232	SLC6A19	5_1225121_C_T	12	22			34		CCLE_WGS	0.352941		0.545455
113	ACH-000045	MV411_HAEMATOPOIETIC_AND_LYMPHOID_TISSUE	Blood	chr5	1221816	1225232	SLC6A19	5_1224405_A_G	15	17			32		CCLE_WGS	0.46875		0.882353
114	ACH-000045	MV411_HAEMATOPOIETIC_AND_LYMPHOID_TISSUE	Blood	chr5	1221816	1225232	SLC6A19	5_1224174_T_C	22	22			44		CCLE_WGS	0.5		1
115	ACH-000045	MV411_HAEMATOPOIETIC_AND_LYMPHOID_TISSUE	Blood	chr5	1221816	1225232	SLC6A19	5_1224083_C_A	19	13			32		CCLE_WGS	0.59375		1.46154
116	ACH-000045	MV411_HAEMATOPOIETIC_AND_LYMPHOID_TISSUE	Blood	chr5	1221816	1225232	SLC6A19	5_1224003_C_T	13	17			30		CCLE_WGS	0.433333		0.764706
117	ACH-000045	MV411_HAEMATOPOIETIC_AND_LYMPHOID_TISSUE	Blood	chr5	1221816	1225232	SLC6A19	5_1223940_A_G	13	25			38		CCLE_WGS	0.342105		0.52
118	ACH-000045	MV411_HAEMATOPOIETIC_AND_LYMPHOID_TISSUE	Blood	chr5	1221816	1225232	SLC6A19	5_1223835_T_C	10	15			25		CCLE_WGS	0.4		0.666667
119	ACH-000045	MV411_HAEMATOPOIETIC_AND_LYMPHOID_TISSUE	Blood	chr5	1221816	1225232	SLC6A19	5_1223772_T_C	25	20			45		CCLE_WGS	0.555556		1.25
120	ACH-000045	MV411_HAEMATOPOIETIC_AND_LYMPHOID_TISSUE	Blood	chr5	1221816	1225232	SLC6A19	5_1224285_G_A	16	17			33		CCLE_WGS	0.484848		0.941176
121	ACH-000045	MV411_HAEMATOPOIETIC_AND_LYMPHOID_TISSUE	Blood	chr5	1208861	1209001	SLC6A19	5_1208964_T_C	17	11			28		CCLE_WGS	0.607143		1.54545
122	ACH-000045	MV411_HAEMATOPOIETIC_AND_LYMPHOID_TISSUE	Blood	chr5	1216673	1217060	SLC6A19	5_1216768_G_A	10	9			19		CCLE_WGS	0.526316		1.11111
123	ACH-000045	MV411_HAEMATOPOIETIC_AND_LYMPHOID_TISSUE	Blood	chr5	1221816	1225232	SLC6A19	5_1223062_G_T	17	19			36		CCLE_WGS	0.472222		0.894737
124	ACH-000045	MV411_HAEMATOPOIETIC_AND_LYMPHOID_TISSUE	Blood	chr5	1221816	1225232	SLC6A19	5_1223730_G_A	33	18			51		CCLE_WGS	0.647059		1.83333
125	ACH-000047	GCIY_STOMACH	Gastric	chr5	1201710	1201967	SLC6A19	5_1201806_G_A	24	12			36		CCLE_WGS	0.666667		2
126	ACH-000047	GCIY_STOMACH	Gastric	chr5	1216673	1217060	SLC6A19	5_1216775_A_G	20	35			55		CCLE_WGS	0.363636		0.571429
127	ACH-000047	GCIY_STOMACH	Gastric	chr5	1221816	1225232	SLC6A19	5_1223062_G_T	12	24			36		CCLE_WGS	0.333333		0.5
128	ACH-000047	GCIY_STOMACH	Gastric	chr5	1221816	1225232	SLC6A19	5_1223772_T_C	43	38			81		CCLE_WGS	0.530864		1.13158
129	ACH-000047	GCIY_STOMACH	Gastric	chr5	1221816	1225232	SLC6A19	5_1224405_A_G	22	42			64		CCLE_WGS	0.34375		0.52381
130	ACH-000047	GCIY_STOMACH	Gastric	chr5	1221816	1225232	SLC6A19	5_1224285_G_A	12	41			53		CCLE_WGS	0.226415		0.292683
131	ACH-000047	GCIY_STOMACH	Gastric	chr5	1221816	1225232	SLC6A19	5_1224001_T_C	17	28			45		CCLE_WGS	0.377778		0.607143
132	ACH-000047	GCIY_STOMACH	Gastric	chr5	1221816	1225232	SLC6A19	5_1224795_G_C	19	35			54		CCLE_WGS	0.351852		0.542857
133	ACH-000047	GCIY_STOMACH	Gastric	chr5	1221816	1225232	SLC6A19	5_1224083_C_A	13	33			46		CCLE_WGS	0.282609		0.393939
134	ACH-000047	GCIY_STOMACH	Gastric	chr5	1221816	1225232	SLC6A19	5_1224174_T_C	19	42			61		CCLE_WGS	0.311475		0.452381
135	ACH-000047	GCIY_STOMACH	Gastric	chr5	1221816	1225232	SLC6A19	5_1224490_G_T	20	49			69		CCLE_WGS	0.289855		0.408163
136	ACH-000053	KARPAS299_HAEMATOPOIETIC_AND_LYMPHOID_TISSUE	Lymphocyte	chr5	1221816	1225232	SLC6A19	5_1223062_G_T	9	18			27		CCLE_WGS	0.333333		0.5
137	ACH-000053	KARPAS299_HAEMATOPOIETIC_AND_LYMPHOID_TISSUE	Lymphocyte	chr5	1221816	1225232	SLC6A19	5_1224174_T_C	20	16			36		CCLE_WGS	0.555556		1.25
138	ACH-000053	KARPAS299_HAEMATOPOIETIC_AND_LYMPHOID_TISSUE	Lymphocyte	chr5	1221816	1225232	SLC6A19	5_1223772_T_C	21	16			37		CCLE_WGS	0.567568		1.3125
139	ACH-000053	KARPAS299_HAEMATOPOIETIC_AND_LYMPHOID_TISSUE	Lymphocyte	chr5	1221816	1225232	SLC6A19	5_1223835_T_C	15	22			37		CCLE_WGS	0.405405		0.681818
140	ACH-000053	KARPAS299_HAEMATOPOIETIC_AND_LYMPHOID_TISSUE	Lymphocyte	chr5	1221816	1225232	SLC6A19	5_1223940_A_G	19	17			36		CCLE_WGS	0.527778		1.11765
141	ACH-000053	KARPAS299_HAEMATOPOIETIC_AND_LYMPHOID_TISSUE	Lymphocyte	chr5	1221816	1225232	SLC6A19	5_1224003_C_T	20	8			28		CCLE_WGS	0.714286		2.5
142	ACH-000053	KARPAS299_HAEMATOPOIETIC_AND_LYMPHOID_TISSUE	Lymphocyte	chr5	1221816	1225232	SLC6A19	5_1225121_C_T	12	16			28		CCLE_WGS	0.428571		0.75
143	ACH-000053	KARPAS299_HAEMATOPOIETIC_AND_LYMPHOID_TISSUE	Lymphocyte	chr5	1221816	1225232	SLC6A19	5_1224405_A_G	12	16			28		CCLE_WGS	0.428571		0.75
144	ACH-000053	KARPAS299_HAEMATOPOIETIC_AND_LYMPHOID_TISSUE	Lymphocyte	chr5	1221816	1225232	SLC6A19	5_1223700_C_T	25	8			33		CCLE_WGS	0.757576		3.125
145	ACH-000053	KARPAS299_HAEMATOPOIETIC_AND_LYMPHOID_TISSUE	Lymphocyte	chr5	1221816	1225232	SLC6A19	5_1224083_C_A	14	20			34		CCLE_WGS	0.411765		0.7
146	ACH-000060	PANC1005_PANCREAS	Pancreas	chr5	1221816	1225232	SLC6A19	5_1225121_C_T	26	23			49		CCLE_WGS	0.530612		1.13043
147	ACH-000060	PANC1005_PANCREAS	Pancreas	chr5	1221816	1225232	SLC6A19	5_1223062_G_T	23	17			40		CCLE_WGS	0.575		1.35294
148	ACH-000060	PANC1005_PANCREAS	Pancreas	chr5	1221816	1225232	SLC6A19	5_1223730_G_A	43	21			64		CCLE_WGS	0.671875		2.04762
149	ACH-000060	PANC1005_PANCREAS	Pancreas	chr5	1221816	1225232	SLC6A19	5_1223772_T_C	44	25			69		CCLE_WGS	0.637681		1.76
150	ACH-000060	PANC1005_PANCREAS	Pancreas	chr5	1221816	1225232	SLC6A19	5_1223835_T_C	29	28			57		CCLE_WGS	0.508772		1.03571
151	ACH-000060	PANC1005_PANCREAS	Pancreas	chr5	1221816	1225232	SLC6A19	5_1223940_A_G	22	14			36		CCLE_WGS	0.611111		1.57143
152	ACH-000060	PANC1005_PANCREAS	Pancreas	chr5	1221816	1225232	SLC6A19	5_1224003_C_T	13	13			26		CCLE_WGS	0.5		1
153	ACH-000060	PANC1005_PANCREAS	Pancreas	chr5	1221816	1225232	SLC6A19	5_1224083_C_A	21	25			46		CCLE_WGS	0.456522		0.84
154	ACH-000060	PANC1005_PANCREAS	Pancreas	chr5	1221816	1225232	SLC6A19	5_1224174_T_C	32	28			60		CCLE_WGS	0.533333		1.14286
155	ACH-000060	PANC1005_PANCREAS	Pancreas	chr5	1221816	1225232	SLC6A19	5_1224285_G_A	25	11			36		CCLE_WGS	0.694444		2.27273
156	ACH-000060	PANC1005_PANCREAS	Pancreas	chr5	1221816	1225232	SLC6A19	5_1224405_A_G	23	16			39		CCLE_WGS	0.589744		1.4375
157	ACH-000062	RERFLCMS_LUNG	Lung	chr5	1221816	1225232	SLC6A19	5_1223772_T_C	36	68			104		CCLE_WGS	0.346154		0.529412
158	ACH-000063	HS616T_FIBROBLAST	Fibroblast	chr5	1216673	1217060	SLC6A19	5_1216900_G_A	45	45			90		CCLE_WES	0.5		1
159	ACH-000063	HS616T_FIBROBLAST	Fibroblast	chr5	1208861	1209001	SLC6A19	5_1208964_T_C	21	21			42		CCLE_WES	0.5		1
160	ACH-000065	OCIAML5_HAEMATOPOIETIC_AND_LYMPHOID_TISSUE	Blood	chr5	1213578	1213688	SLC6A19	5_1213668_G_A	19	12			31		CCLE_WES	0.612903		1.58333
161	ACH-000065	OCIAML5_HAEMATOPOIETIC_AND_LYMPHOID_TISSUE	Blood	chr5	1216673	1217060	SLC6A19	5_1216900_G_A	26	35			61		CCLE_WES	0.42623		0.742857
162	ACH-000066	HCC4006_LUNG	Lung	chr5	1216673	1217060	SLC6A19	5_1216900_G_A	96	36			132		CCLE_WES	0.727273		2.66667
163	ACH-000068	REC1_HAEMATOPOIETIC_AND_LYMPHOID_TISSUE	Lymphocyte	chr5	1221816	1225232	SLC6A19	5_1223062_G_T	18	23			41		CCLE_WGS	0.439024		0.782609
164	ACH-000068	REC1_HAEMATOPOIETIC_AND_LYMPHOID_TISSUE	Lymphocyte	chr5	1221816	1225232	SLC6A19	5_1223772_T_C	43	36			79		CCLE_WGS	0.544304		1.19444
165	ACH-000068	REC1_HAEMATOPOIETIC_AND_LYMPHOID_TISSUE	Lymphocyte	chr5	1221816	1225232	SLC6A19	5_1223835_T_C	15	20			35		CCLE_WGS	0.428571		0.75
166	ACH-000068	REC1_HAEMATOPOIETIC_AND_LYMPHOID_TISSUE	Lymphocyte	chr5	1221816	1225232	SLC6A19	5_1223940_A_G	30	12			42		CCLE_WGS	0.714286		2.5
167	ACH-000068	REC1_HAEMATOPOIETIC_AND_LYMPHOID_TISSUE	Lymphocyte	chr5	1221816	1225232	SLC6A19	5_1224003_C_T	28	13			41		CCLE_WGS	0.682927		2.15385
168	ACH-000068	REC1_HAEMATOPOIETIC_AND_LYMPHOID_TISSUE	Lymphocyte	chr5	1221816	1225232	SLC6A19	5_1224083_C_A	19	23			42		CCLE_WGS	0.452381		0.826087
169	ACH-000068	REC1_HAEMATOPOIETIC_AND_LYMPHOID_TISSUE	Lymphocyte	chr5	1221816	1225232	SLC6A19	5_1224174_T_C	19	32			51		CCLE_WGS	0.372549		0.59375
170	ACH-000068	REC1_HAEMATOPOIETIC_AND_LYMPHOID_TISSUE	Lymphocyte	chr5	1221816	1225232	SLC6A19	5_1224285_G_A	24	17			41		CCLE_WGS	0.585366		1.41176
171	ACH-000068	REC1_HAEMATOPOIETIC_AND_LYMPHOID_TISSUE	Lymphocyte	chr5	1221816	1225232	SLC6A19	5_1224405_A_G	19	31			50		CCLE_WGS	0.38		0.612903
172	ACH-000068	REC1_HAEMATOPOIETIC_AND_LYMPHOID_TISSUE	Lymphocyte	chr5	1221816	1225232	SLC6A19	5_1225121_C_T	26	27			53		CCLE_WGS	0.490566		0.962963
173	ACH-000068	REC1_HAEMATOPOIETIC_AND_LYMPHOID_TISSUE	Lymphocyte	chr5	1221816	1225232	SLC6A19	5_1223730_G_A	51	22			73		CCLE_WGS	0.69863		2.31818
174	ACH-000068	REC1_HAEMATOPOIETIC_AND_LYMPHOID_TISSUE	Lymphocyte	chr5	1208861	1209001	SLC6A19	5_1208964_T_C	14	11			25		CCLE_WGS	0.56		1.27273
175	ACH-000068	REC1_HAEMATOPOIETIC_AND_LYMPHOID_TISSUE	Lymphocyte	chr5	1213578	1213688	SLC6A19	5_1213668_G_A	21	28			49		CCLE_WGS	0.428571		0.75
176	ACH-000073	GRANTA519_HAEMATOPOIETIC_AND_LYMPHOID_TISSUE	Lymphocyte	chr5	1216673	1217060	SLC6A19	5_1216769_C_T	30	22			52		CCLE_WES	0.576923		1.36364
177	ACH-000075	U87MG_CENTRAL_NERVOUS_SYSTEM	Central nervous system	chr5	1221816	1225232	SLC6A19	5_1223730_G_A	19	12			31		CCLE_WGS	0.612903		1.58333
178	ACH-000075	U87MG_CENTRAL_NERVOUS_SYSTEM	Central nervous system	chr5	1221816	1225232	SLC6A19	5_1225121_C_T	19	22			41		CCLE_WGS	0.463415		0.863636
179	ACH-000075	U87MG_CENTRAL_NERVOUS_SYSTEM	Central nervous system	chr5	1221816	1225232	SLC6A19	5_1223940_A_G	17	10			27		CCLE_WGS	0.62963		1.7
180	ACH-000075	U87MG_CENTRAL_NERVOUS_SYSTEM	Central nervous system	chr5	1221816	1225232	SLC6A19	5_1223845_A_G	10	26			36		CCLE_WGS	0.277778		0.384615
181	ACH-000075	U87MG_CENTRAL_NERVOUS_SYSTEM	Central nervous system	chr5	1221816	1225232	SLC6A19	5_1223835_T_C	25	9			34		CCLE_WGS	0.735294		2.77778
182	ACH-000075	U87MG_CENTRAL_NERVOUS_SYSTEM	Central nervous system	chr5	1221816	1225232	SLC6A19	5_1222499_T_C	19	21			40		CCLE_WGS	0.475		0.904762
183	ACH-000075	U87MG_CENTRAL_NERVOUS_SYSTEM	Central nervous system	chr5	1216673	1217060	SLC6A19	5_1216900_G_A	15	31			46		CCLE_WGS	0.326087		0.483871
184	ACH-000075	U87MG_CENTRAL_NERVOUS_SYSTEM	Central nervous system	chr5	1208861	1209001	SLC6A19	5_1208964_T_C	9	10			19		CCLE_WGS	0.473684		0.9
185	ACH-000079	TE125T_FIBROBLAST	Fibroblast	chr5	1216673	1217060	SLC6A19	5_1216900_G_A	48	54			102		CCLE_WES	0.470588		0.888889
186	ACH-000079	TE125T_FIBROBLAST	Fibroblast	chr5	1208861	1209001	SLC6A19	5_1208964_T_C	19	29			48		CCLE_WES	0.395833		0.655172
187	ACH-000080	BDCM_HAEMATOPOIETIC_AND_LYMPHOID_TISSUE	Blood	chr5	1216673	1217060	SLC6A19	5_1216900_G_A	47	54			101		CCLE_WES	0.465347		0.87037
188	ACH-000080	BDCM_HAEMATOPOIETIC_AND_LYMPHOID_TISSUE	Blood	chr5	1213578	1213688	SLC6A19	5_1213668_G_A	22	21			43		CCLE_WES	0.511628		1.04762
189	ACH-000080	BDCM_HAEMATOPOIETIC_AND_LYMPHOID_TISSUE	Blood	chr5	1208861	1209001	SLC6A19	5_1208964_T_C	19	32			51		CCLE_WES	0.372549		0.59375
190	ACH-000081	GDM1_HAEMATOPOIETIC_AND_LYMPHOID_TISSUE	Blood	chr5	1216673	1217060	SLC6A19	5_1216775_A_G	38	35			73		CCLE_WES	0.520548		1.08571
191	ACH-000083	HS281T_FIBROBLAST	Fibroblast	chr5	1213578	1213688	SLC6A19	5_1213668_G_A	12	9			21		CCLE_WES	0.571429		1.33333
192	ACH-000083	HS281T_FIBROBLAST	Fibroblast	chr5	1216673	1217060	SLC6A19	5_1216900_G_A	49	30			79		CCLE_WES	0.620253		1.63333
193	ACH-000083	HS281T_FIBROBLAST	Fibroblast	chr5	1208861	1209001	SLC6A19	5_1208964_T_C	23	15			38		CCLE_WES	0.605263		1.53333
194	ACH-000085	T3M4_PANCREAS	Pancreas	chr5	1216673	1217060	SLC6A19	5_1216775_A_G	84	42			126		CCLE_WES	0.666667		2
195	ACH-000089	NCIH684_LARGE_INTESTINE	Colorectal	chr5	1216673	1217060	SLC6A19	5_1216900_G_A	27	63			90		CCLE_WES	0.3		0.428571
196	ACH-000089	NCIH684_LARGE_INTESTINE	Colorectal	chr5	1208861	1209001	SLC6A19	5_1208964_T_C	20	8			28		CCLE_WES	0.714286		2.5
197	ACH-000091	OV56_OVARY	Ovary	chr5	1221816	1225232	SLC6A19	5_1223772_T_C	24	32			56		CCLE_WGS	0.428571		0.75
198	ACH-000091	OV56_OVARY	Ovary	chr5	1221816	1225232	SLC6A19	5_1222798_G_A	18	16			34		CCLE_WGS	0.529412		1.125
199	ACH-000093	PANC0504_PANCREAS	Pancreas	chr5	1216673	1217060	SLC6A19	5_1216900_G_A	39	41			80		CCLE_WES	0.4875		0.95122
200	ACH-000093	PANC0504_PANCREAS	Pancreas	chr5	1213578	1213688	SLC6A19	5_1213668_G_A	10	16			26		CCLE_WES	0.384615		0.625
201	ACH-000093	PANC0504_PANCREAS	Pancreas	chr5	1208861	1209001	SLC6A19	5_1208964_T_C	18	17			35		CCLE_WES	0.514286		1.05882
202	ACH-000096	G401_SOFT_TISSUE	Kidney	chr5	1221816	1225232	SLC6A19	5_1223772_T_C	43	23			66		CCLE_WGS	0.651515		1.86957
203	ACH-000096	G401_SOFT_TISSUE	Kidney	chr5	1221816	1225232	SLC6A19	5_1223730_G_A	46	20			66		CCLE_WGS	0.69697		2.3
204	ACH-000096	G401_SOFT_TISSUE	Kidney	chr5	1221816	1225232	SLC6A19	5_1223835_T_C	21	22			43		CCLE_WGS	0.488372		0.954545
205	ACH-000096	G401_SOFT_TISSUE	Kidney	chr5	1221816	1225232	SLC6A19	5_1223940_A_G	15	16			31		CCLE_WGS	0.483871		0.9375
206	ACH-000096	G401_SOFT_TISSUE	Kidney	chr5	1221816	1225232	SLC6A19	5_1224003_C_T	19	8			27		CCLE_WGS	0.703704		2.375
207	ACH-000096	G401_SOFT_TISSUE	Kidney	chr5	1221816	1225232	SLC6A19	5_1225121_C_T	21	15			36		CCLE_WGS	0.583333		1.4
208	ACH-000096	G401_SOFT_TISSUE	Kidney	chr5	1221816	1225232	SLC6A19	5_1223062_G_T	13	17			30		CCLE_WGS	0.433333		0.764706
209	ACH-000096	G401_SOFT_TISSUE	Kidney	chr5	1221816	1225232	SLC6A19	5_1224405_A_G	27	26			53		CCLE_WGS	0.509434		1.03846
210	ACH-000096	G401_SOFT_TISSUE	Kidney	chr5	1221816	1225232	SLC6A19	5_1224285_G_A	15	17			32		CCLE_WGS	0.46875		0.882353
211	ACH-000096	G401_SOFT_TISSUE	Kidney	chr5	1221816	1225232	SLC6A19	5_1224174_T_C	23	20			43		CCLE_WGS	0.534884		1.15
212	ACH-000096	G401_SOFT_TISSUE	Kidney	chr5	1221816	1225232	SLC6A19	5_1224083_C_A	14	10			24		CCLE_WGS	0.583333		1.4
213	ACH-000097	ZR751_BREAST	Breast	chr5	1208861	1209001	SLC6A19	5_1208964_T_C	27	14			41		CCLE_WES	0.658537		1.92857
214	ACH-000097	ZR751_BREAST	Breast	chr5	1221816	1225232	SLC6A19	5_1225121_C_T	10	26			36		CCLE_WGS	0.277778		0.384615
215	ACH-000097	ZR751_BREAST	Breast	chr5	1221816	1225232	SLC6A19	5_1224795_G_C	9	28			37		CCLE_WGS	0.243243		0.321429
216	ACH-000097	ZR751_BREAST	Breast	chr5	1221816	1225232	SLC6A19	5_1224490_G_T	13	23			36		CCLE_WGS	0.361111		0.565217
217	ACH-000097	ZR751_BREAST	Breast	chr5	1221816	1225232	SLC6A19	5_1224001_T_C	12	17			29		CCLE_WGS	0.413793		0.705882
218	ACH-000097	ZR751_BREAST	Breast	chr5	1221816	1225232	SLC6A19	5_1224003_C_T	12	17			29		CCLE_WGS	0.413793		0.705882
219	ACH-000097	ZR751_BREAST	Breast	chr5	1221816	1225232	SLC6A19	5_1223802_G_A	9	10			19		CCLE_WGS	0.473684		0.9
220	ACH-000097	ZR751_BREAST	Breast	chr5	1216673	1217060	SLC6A19	5_1216775_A_G	11	20			31		CCLE_WGS	0.354839		0.55
221	ACH-000097	ZR751_BREAST	Breast	chr5	1216673	1217060	SLC6A19	5_1216775_A_G	15	34			49		CCLE_WES	0.306122		0.441176
222	ACH-000097	ZR751_BREAST	Breast	chr5	1221816	1225232	SLC6A19	5_1224051_C_T	12	17			29		CCLE_WGS	0.413793		0.705882
223	ACH-000098	GAMG_CENTRAL_NERVOUS_SYSTEM	Central nervous system	chr5	1221816	1225232	SLC6A19	5_1222499_T_C	27	26			53		CCLE_WGS	0.509434		1.03846
224	ACH-000098	GAMG_CENTRAL_NERVOUS_SYSTEM	Central nervous system	chr5	1221816	1225232	SLC6A19	5_1223700_C_T	21	26			47		CCLE_WGS	0.446809		0.807692
225	ACH-000098	GAMG_CENTRAL_NERVOUS_SYSTEM	Central nervous system	chr5	1221816	1225232	SLC6A19	5_1223835_T_C	46	31			77		CCLE_WGS	0.597403		1.48387
226	ACH-000098	GAMG_CENTRAL_NERVOUS_SYSTEM	Central nervous system	chr5	1216673	1217060	SLC6A19	5_1216900_G_A	30	30			60		CCLE_WGS	0.5		1
227	ACH-000098	GAMG_CENTRAL_NERVOUS_SYSTEM	Central nervous system	chr5	1221816	1225232	SLC6A19	5_1223940_A_G	27	24			51		CCLE_WGS	0.529412		1.125
228	ACH-000098	GAMG_CENTRAL_NERVOUS_SYSTEM	Central nervous system	chr5	1221816	1225232	SLC6A19	5_1224001_T_C	22	13			35		CCLE_WGS	0.628571		1.69231
229	ACH-000098	GAMG_CENTRAL_NERVOUS_SYSTEM	Central nervous system	chr5	1221816	1225232	SLC6A19	5_1224003_C_T	24	13			37		CCLE_WGS	0.648649		1.84615
230	ACH-000098	GAMG_CENTRAL_NERVOUS_SYSTEM	Central nervous system	chr5	1221816	1225232	SLC6A19	5_1225121_C_T	23	36			59		CCLE_WGS	0.389831		0.638889
231	ACH-000098	GAMG_CENTRAL_NERVOUS_SYSTEM	Central nervous system	chr5	1221816	1225232	SLC6A19	5_1223845_A_G	33	41			74		CCLE_WGS	0.445946		0.804878
232	ACH-000099	SIMA_AUTONOMIC_GANGLIA	Peripheral nervous system	chr5	1212418	1212599	SLC6A19	5_1212434_C_T	35	26			61		CCLE_WES	0.57377		1.34615
233	ACH-000099	SIMA_AUTONOMIC_GANGLIA	Peripheral nervous system	chr5	1213578	1213688	SLC6A19	5_1213668_G_A	11	13			24		CCLE_WES	0.458333		0.846154
234	ACH-000099	SIMA_AUTONOMIC_GANGLIA	Peripheral nervous system	chr5	1216673	1217060	SLC6A19	5_1216900_G_A	38	37			75		CCLE_WES	0.506667		1.02703
235	ACH-000105	ALLSIL_HAEMATOPOIETIC_AND_LYMPHOID_TISSUE	Blood	chr5	1208861	1209001	SLC6A19	5_1208964_T_C	27	28			55		CCLE_WES	0.490909		0.964286
236	ACH-000105	ALLSIL_HAEMATOPOIETIC_AND_LYMPHOID_TISSUE	Blood	chr5	1216673	1217060	SLC6A19	5_1216900_G_A	44	39			83		CCLE_WES	0.53012		1.12821
237	ACH-000109	NCIH3255_LUNG	Lung	chr5	1221816	1225232	SLC6A19	5_1223730_G_A	28	14			42		CCLE_WGS	0.666667		2
238	ACH-000109	NCIH3255_LUNG	Lung	chr5	1221816	1225232	SLC6A19	5_1222316_G_T	57	12			69		CCLE_WGS	0.826087		4.75
239	ACH-000109	NCIH3255_LUNG	Lung	chr5	1221816	1225232	SLC6A19	5_1223700_C_T	14	42			56		CCLE_WGS	0.25		0.333333
240	ACH-000110	NCCSTCK140_STOMACH	Gastric	chr5	1216673	1217060	SLC6A19	5_1216900_G_A	55	45			100		CCLE_WES	0.55		1.22222
241	ACH-000117	EFM192A_BREAST	Breast	chr5	1208861	1209001	SLC6A19	5_1208964_T_C	14	15			29		CCLE_WGS	0.482759		0.933333
242	ACH-000117	EFM192A_BREAST	Breast	chr5	1221816	1225232	SLC6A19	5_1223700_C_T	22	16			38		CCLE_WGS	0.578947		1.375
243	ACH-000117	EFM192A_BREAST	Breast	chr5	1221816	1225232	SLC6A19	5_1223730_G_A	9	21			30		CCLE_WGS	0.3		0.428571
244	ACH-000119	HS863T_FIBROBLAST	Fibroblast	chr5	1216673	1217060	SLC6A19	5_1216900_G_A	60	47			107		CCLE_WES	0.560748		1.2766
245	ACH-000120	CHP212_AUTONOMIC_GANGLIA	Peripheral nervous system	chr5	1221816	1225232	SLC6A19	5_1224083_C_A	25	19			44		CCLE_WGS	0.568182		1.31579
246	ACH-000120	CHP212_AUTONOMIC_GANGLIA	Peripheral nervous system	chr5	1221816	1225232	SLC6A19	5_1223940_A_G	20	15			35		CCLE_WGS	0.571429		1.33333
247	ACH-000120	CHP212_AUTONOMIC_GANGLIA	Peripheral nervous system	chr5	1221816	1225232	SLC6A19	5_1223835_T_C	27	23			50		CCLE_WGS	0.54		1.17391
248	ACH-000120	CHP212_AUTONOMIC_GANGLIA	Peripheral nervous system	chr5	1213578	1213688	SLC6A19	5_1213668_G_A	21	20			41		CCLE_WGS	0.512195		1.05
249	ACH-000120	CHP212_AUTONOMIC_GANGLIA	Peripheral nervous system	chr5	1221816	1225232	SLC6A19	5_1224174_T_C	24	27			51		CCLE_WGS	0.470588		0.888889
250	ACH-000120	CHP212_AUTONOMIC_GANGLIA	Peripheral nervous system	chr5	1221816	1225232	SLC6A19	5_1224285_G_A	21	24			45		CCLE_WGS	0.466667		0.875
251	ACH-000120	CHP212_AUTONOMIC_GANGLIA	Peripheral nervous system	chr5	1221816	1225232	SLC6A19	5_1224405_A_G	27	27			54		CCLE_WGS	0.5		1
252	ACH-000120	CHP212_AUTONOMIC_GANGLIA	Peripheral nervous system	chr5	1221816	1225232	SLC6A19	5_1223772_T_C	41	22			63		CCLE_WGS	0.650794		1.86364
253	ACH-000120	CHP212_AUTONOMIC_GANGLIA	Peripheral nervous system	chr5	1221816	1225232	SLC6A19	5_1225121_C_T	24	17			41		CCLE_WGS	0.585366		1.41176
254	ACH-000120	CHP212_AUTONOMIC_GANGLIA	Peripheral nervous system	chr5	1221816	1225232	SLC6A19	5_1223730_G_A	38	20			58		CCLE_WGS	0.655172		1.9
255	ACH-000120	CHP212_AUTONOMIC_GANGLIA	Peripheral nervous system	chr5	1221816	1225232	SLC6A19	5_1223062_G_T	24	32			56		CCLE_WGS	0.428571		0.75
256	ACH-000120	CHP212_AUTONOMIC_GANGLIA	Peripheral nervous system	chr5	1208861	1209001	SLC6A19	5_1208964_T_C	12	16			28		CCLE_WGS	0.428571		0.75
257	ACH-000124	OCILY19_HAEMATOPOIETIC_AND_LYMPHOID_TISSUE	Lymphocyte	chr5	1216673	1217060	SLC6A19	5_1216900_G_A	59	38			97		CCLE_WES	0.608247		1.55263
258	ACH-000125	TO175T_FIBROBLAST	Fibroblast	chr5	1216673	1217060	SLC6A19	5_1216900_G_A	44	39			83		CCLE_WES	0.53012		1.12821
259	ACH-000125	TO175T_FIBROBLAST	Fibroblast	chr5	1208861	1209001	SLC6A19	5_1208964_T_C	28	31			59		CCLE_WES	0.474576		0.903226
260	ACH-000129	NCIH1341_LUNG	Lung	chr5	1221816	1225232	SLC6A19	5_1223062_G_T	18	19			37		CCLE_WGS	0.486486		0.947368
261	ACH-000129	NCIH1341_LUNG	Lung	chr5	1216673	1217060	SLC6A19	5_1216900_G_A	48	48			96		CCLE_WES	0.5		1
262	ACH-000129	NCIH1341_LUNG	Lung	chr5	1221816	1225232	SLC6A19	5_1224795_G_C	24	19			43		CCLE_WGS	0.55814		1.26316
263	ACH-000129	NCIH1341_LUNG	Lung	chr5	1221816	1225232	SLC6A19	5_1224174_T_C	15	14			29		CCLE_WGS	0.517241		1.07143
264	ACH-000129	NCIH1341_LUNG	Lung	chr5	1221816	1225232	SLC6A19	5_1224083_C_A	14	18			32		CCLE_WGS	0.4375		0.777778
265	ACH-000129	NCIH1341_LUNG	Lung	chr5	1221816	1225232	SLC6A19	5_1224285_G_A	13	18			31		CCLE_WGS	0.419355		0.722222
266	ACH-000129	NCIH1341_LUNG	Lung	chr5	1221816	1225232	SLC6A19	5_1223772_T_C	34	32			66		CCLE_WGS	0.515152		1.0625
267	ACH-000129	NCIH1341_LUNG	Lung	chr5	1221816	1225232	SLC6A19	5_1222667_G_A	19	9			28		CCLE_WGS	0.678571		2.11111
268	ACH-000129	NCIH1341_LUNG	Lung	chr5	1221816	1225232	SLC6A19	5_1222480_C_T	22	22			44		CCLE_WGS	0.5		1
269	ACH-000129	NCIH1341_LUNG	Lung	chr5	1221816	1225232	SLC6A19	5_1223700_C_T	52	9			61		CCLE_WGS	0.852459		5.77778
270	ACH-000129	NCIH1341_LUNG	Lung	chr5	1216673	1217060	SLC6A19	5_1216900_G_A	23	20			43		CCLE_WGS	0.534884		1.15
271	ACH-000130	NALM19_HAEMATOPOIETIC_AND_LYMPHOID_TISSUE	Blood	chr5	1208861	1209001	SLC6A19	5_1208964_T_C	41	38			79		CCLE_WES	0.518987		1.07895
272	ACH-000130	NALM19_HAEMATOPOIETIC_AND_LYMPHOID_TISSUE	Blood	chr5	1216673	1217060	SLC6A19	5_1216775_A_G	36	51			87		CCLE_WES	0.413793		0.705882
273	ACH-000130	NALM19_HAEMATOPOIETIC_AND_LYMPHOID_TISSUE	Blood	chr5	1216673	1217060	SLC6A19	5_1216900_G_A	51	82			133		CCLE_WES	0.383459		0.621951
274	ACH-000130	NALM19_HAEMATOPOIETIC_AND_LYMPHOID_TISSUE	Blood	chr5	1213578	1213688	SLC6A19	5_1213668_G_A	17	45			62		CCLE_WES	0.274194		0.377778
275	ACH-000132	JHOS2_OVARY	Ovary	chr5	1221816	1225232	SLC6A19	5_1224003_C_T	10	13			23		CCLE_WGS	0.434783		0.769231
276	ACH-000132	JHOS2_OVARY	Ovary	chr5	1216673	1217060	SLC6A19	5_1216775_A_G	15	20			35		CCLE_WGS	0.428571		0.75
277	ACH-000132	JHOS2_OVARY	Ovary	chr5	1221816	1225232	SLC6A19	5_1222776_G_A	27	13			40		CCLE_WGS	0.675		2.07692
278	ACH-000132	JHOS2_OVARY	Ovary	chr5	1221816	1225232	SLC6A19	5_1224051_C_T	14	16			30		CCLE_WGS	0.466667		0.875
279	ACH-000132	JHOS2_OVARY	Ovary	chr5	1221816	1225232	SLC6A19	5_1224490_G_T	15	26			41		CCLE_WGS	0.365854		0.576923
280	ACH-000132	JHOS2_OVARY	Ovary	chr5	1221816	1225232	SLC6A19	5_1224795_G_C	17	25			42		CCLE_WGS	0.404762		0.68
281	ACH-000132	JHOS2_OVARY	Ovary	chr5	1221816	1225232	SLC6A19	5_1225121_C_T	20	24			44		CCLE_WGS	0.454545		0.833333
282	ACH-000132	JHOS2_OVARY	Ovary	chr5	1213578	1213688	SLC6A19	5_1213668_G_A	13	18			31		CCLE_WGS	0.419355		0.722222
283	ACH-000132	JHOS2_OVARY	Ovary	chr5	1221816	1225232	SLC6A19	5_1223730_G_A	18	29			47		CCLE_WGS	0.382979		0.62069
284	ACH-000132	JHOS2_OVARY	Ovary	chr5	1221816	1225232	SLC6A19	5_1224001_T_C	9	12			21		CCLE_WGS	0.428571		0.75
285	ACH-000132	JHOS2_OVARY	Ovary	chr5	1216673	1217060	SLC6A19	5_1216775_A_G	17	27			44		CCLE_WES	0.386364		0.62963
286	ACH-000132	JHOS2_OVARY	Ovary	chr5	1213578	1213688	SLC6A19	5_1213668_G_A	12	13			25		CCLE_WES	0.48		0.923077
287	ACH-000132	JHOS2_OVARY	Ovary	chr5	1208861	1209001	SLC6A19	5_1208964_T_C	8	24			32		CCLE_WES	0.25		0.333333
288	ACH-000132	JHOS2_OVARY	Ovary	chr5	1221816	1225232	SLC6A19	5_1223835_T_C	20	30			50		CCLE_WGS	0.4		0.666667
289	ACH-000133	HS729_SOFT_TISSUE	Fibroblast	chr5	1208861	1209001	SLC6A19	5_1208964_T_C	32	21			53		CCLE_WES	0.603774		1.52381
290	ACH-000134	HS274T_FIBROBLAST	Fibroblast	chr5	1208861	1209001	SLC6A19	5_1208964_T_C	20	25			45		CCLE_WES	0.444444		0.8
291	ACH-000134	HS274T_FIBROBLAST	Fibroblast	chr5	1213578	1213688	SLC6A19	5_1213668_G_A	14	21			35		CCLE_WES	0.4		0.666667
292	ACH-000135	HS940T_FIBROBLAST	Fibroblast	chr5	1216673	1217060	SLC6A19	5_1216900_G_A	39	38			77		CCLE_WES	0.506494		1.02632
293	ACH-000135	HS940T_FIBROBLAST	Fibroblast	chr5	1208861	1209001	SLC6A19	5_1208964_T_C	21	17			38		CCLE_WES	0.552632		1.23529
294	ACH-000135	HS940T_FIBROBLAST	Fibroblast	chr5	1213578	1213688	SLC6A19	5_1213668_G_A	14	15			29		CCLE_WES	0.482759		0.933333
295	ACH-000139	PANC0327_PANCREAS	Pancreas	chr5	1221816	1225232	SLC6A19	5_1222667_G_A	26	25			51		CCLE_WGS	0.509804		1.04
296	ACH-000139	PANC0327_PANCREAS	Pancreas	chr5	1221816	1225232	SLC6A19	5_1224001_T_C	29	35			64		CCLE_WGS	0.453125		0.828571
297	ACH-000139	PANC0327_PANCREAS	Pancreas	chr5	1221816	1225232	SLC6A19	5_1224405_A_G	33	39			72		CCLE_WGS	0.458333		0.846154
298	ACH-000139	PANC0327_PANCREAS	Pancreas	chr5	1221816	1225232	SLC6A19	5_1222499_T_C	36	26			62		CCLE_WGS	0.580645		1.38462
299	ACH-000139	PANC0327_PANCREAS	Pancreas	chr5	1221816	1225232	SLC6A19	5_1222480_C_T	23	36			59		CCLE_WGS	0.389831		0.638889
300	ACH-000139	PANC0327_PANCREAS	Pancreas	chr5	1221816	1225232	SLC6A19	5_1223874_A_G	24	21			45		CCLE_WGS	0.533333		1.14286
301	ACH-000139	PANC0327_PANCREAS	Pancreas	chr5	1221816	1225232	SLC6A19	5_1224795_G_C	26	26			52		CCLE_WGS	0.5		1
302	ACH-000140	PFEIFFER_HAEMATOPOIETIC_AND_LYMPHOID_TISSUE	Lymphocyte	chr5	1216673	1217060	SLC6A19	5_1216900_G_A	51	47			98		CCLE_WES	0.520408		1.08511
303	ACH-000141	SNU308_BILIARY_TRACT	Bile duct	chr5	1216673	1217060	SLC6A19	5_1216775_A_G	26	46			72		CCLE_WES	0.361111		0.565217
304	ACH-000141	SNU308_BILIARY_TRACT	Bile duct	chr5	1208861	1209001	SLC6A19	5_1208964_T_C	37	12			49		CCLE_WES	0.755102		3.08333
305	ACH-000141	SNU308_BILIARY_TRACT	Bile duct	chr5	1216673	1217060	SLC6A19	5_1216900_G_A	26	52			78		CCLE_WES	0.333333		0.5
306	ACH-000145	SKLMS1_SOFT_TISSUE	Soft tissue	chr5	1221816	1225232	SLC6A19	5_1223845_A_G	29	21			50		CCLE_WGS	0.58		1.38095
307	ACH-000145	SKLMS1_SOFT_TISSUE	Soft tissue	chr5	1221816	1225232	SLC6A19	5_1225121_C_T	21	28			49		CCLE_WGS	0.428571		0.75
308	ACH-000145	SKLMS1_SOFT_TISSUE	Soft tissue	chr5	1221816	1225232	SLC6A19	5_1224003_C_T	22	17			39		CCLE_WGS	0.564103		1.29412
309	ACH-000145	SKLMS1_SOFT_TISSUE	Soft tissue	chr5	1221816	1225232	SLC6A19	5_1224001_T_C	22	17			39		CCLE_WGS	0.564103		1.29412
310	ACH-000145	SKLMS1_SOFT_TISSUE	Soft tissue	chr5	1221816	1225232	SLC6A19	5_1223835_T_C	24	29			53		CCLE_WGS	0.45283		0.827586
311	ACH-000145	SKLMS1_SOFT_TISSUE	Soft tissue	chr5	1216673	1217060	SLC6A19	5_1216900_G_A	27	25			52		CCLE_WGS	0.519231		1.08
312	ACH-000145	SKLMS1_SOFT_TISSUE	Soft tissue	chr5	1221816	1225232	SLC6A19	5_1223940_A_G	16	31			47		CCLE_WGS	0.340426		0.516129
313	ACH-000145	SKLMS1_SOFT_TISSUE	Soft tissue	chr5	1221816	1225232	SLC6A19	5_1222499_T_C	46	43			89		CCLE_WGS	0.516854		1.06977
314	ACH-000145	SKLMS1_SOFT_TISSUE	Soft tissue	chr5	1221816	1225232	SLC6A19	5_1223730_G_A	21	26			47		CCLE_WGS	0.446809		0.807692
315	ACH-000146	THP1_HAEMATOPOIETIC_AND_LYMPHOID_TISSUE	Blood	chr5	1221816	1225232	SLC6A19	5_1224795_G_C	15	24			39		CCLE_WGS	0.384615		0.625
316	ACH-000146	THP1_HAEMATOPOIETIC_AND_LYMPHOID_TISSUE	Blood	chr5	1221816	1225232	SLC6A19	5_1224490_G_T	25	20			45		CCLE_WGS	0.555556		1.25
317	ACH-000146	THP1_HAEMATOPOIETIC_AND_LYMPHOID_TISSUE	Blood	chr5	1221816	1225232	SLC6A19	5_1224051_C_T	17	32			49		CCLE_WGS	0.346939		0.53125
318	ACH-000146	THP1_HAEMATOPOIETIC_AND_LYMPHOID_TISSUE	Blood	chr5	1221816	1225232	SLC6A19	5_1224003_C_T	20	22			42		CCLE_WGS	0.47619		0.909091
319	ACH-000146	THP1_HAEMATOPOIETIC_AND_LYMPHOID_TISSUE	Blood	chr5	1221816	1225232	SLC6A19	5_1224001_T_C	18	24			42		CCLE_WGS	0.428571		0.75
320	ACH-000146	THP1_HAEMATOPOIETIC_AND_LYMPHOID_TISSUE	Blood	chr5	1221816	1225232	SLC6A19	5_1223940_A_G	23	23			46		CCLE_WGS	0.5		1
321	ACH-000146	THP1_HAEMATOPOIETIC_AND_LYMPHOID_TISSUE	Blood	chr5	1221816	1225232	SLC6A19	5_1223835_T_C	32	27			59		CCLE_WGS	0.542373		1.18519
322	ACH-000146	THP1_HAEMATOPOIETIC_AND_LYMPHOID_TISSUE	Blood	chr5	1221816	1225232	SLC6A19	5_1223700_C_T	24	27			51		CCLE_WGS	0.470588		0.888889
323	ACH-000146	THP1_HAEMATOPOIETIC_AND_LYMPHOID_TISSUE	Blood	chr5	1216673	1217060	SLC6A19	5_1216775_A_G	20	20			40		CCLE_WGS	0.5		1
324	ACH-000146	THP1_HAEMATOPOIETIC_AND_LYMPHOID_TISSUE	Blood	chr5	1221816	1225232	SLC6A19	5_1225121_C_T	25	30			55		CCLE_WGS	0.454545		0.833333
325	ACH-000147	T47D_BREAST	Breast	chr5	1221816	1225232	SLC6A19	5_1225121_C_T	29	39			68		CCLE_WGS	0.426471		0.74359
326	ACH-000147	T47D_BREAST	Breast	chr5	1221816	1225232	SLC6A19	5_1222499_T_C	40	24			64		CCLE_WGS	0.625		1.66667
327	ACH-000147	T47D_BREAST	Breast	chr5	1221816	1225232	SLC6A19	5_1223940_A_G	26	43			69		CCLE_WGS	0.376812		0.604651
328	ACH-000147	T47D_BREAST	Breast	chr5	1221816	1225232	SLC6A19	5_1223845_A_G	34	21			55		CCLE_WGS	0.618182		1.61905
329	ACH-000147	T47D_BREAST	Breast	chr5	1221816	1225232	SLC6A19	5_1222756_G_C	12	43			55		CCLE_WGS	0.218182		0.27907
330	ACH-000147	T47D_BREAST	Breast	chr5	1221816	1225232	SLC6A19	5_1223730_G_A	20	40			60		CCLE_WGS	0.333333		0.5
331	ACH-000147	T47D_BREAST	Breast	chr5	1221816	1225232	SLC6A19	5_1223835_T_C	20	35			55		CCLE_WGS	0.363636		0.571429
332	ACH-000147	T47D_BREAST	Breast	chr5	1216673	1217060	SLC6A19	5_1216900_G_A	34	23			57		CCLE_WGS	0.596491		1.47826
333	ACH-000151	JM1_HAEMATOPOIETIC_AND_LYMPHOID_TISSUE	Blood	chr5	1213578	1213688	SLC6A19	5_1213668_G_A	38	11			49		CCLE_WES	0.77551		3.45455
334	ACH-000151	JM1_HAEMATOPOIETIC_AND_LYMPHOID_TISSUE	Blood	chr5	1208861	1209001	SLC6A19	5_1208964_T_C	52	25			77		CCLE_WES	0.675325		2.08
335	ACH-000151	JM1_HAEMATOPOIETIC_AND_LYMPHOID_TISSUE	Blood	chr5	1216673	1217060	SLC6A19	5_1216900_G_A	42	95			137		CCLE_WES	0.306569		0.442105
336	ACH-000153	NCIH2052_PLEURA	Lung	chr5	1216673	1217060	SLC6A19	5_1216900_G_A	44	69			113		CCLE_WGS	0.389381		0.637681
337	ACH-000153	NCIH2052_PLEURA	Lung	chr5	1221816	1225232	SLC6A19	5_1223062_G_T	53	33			86		CCLE_WGS	0.616279		1.60606
338	ACH-000153	NCIH2052_PLEURA	Lung	chr5	1221816	1225232	SLC6A19	5_1222499_T_C	23	60			83		CCLE_WGS	0.277108		0.383333
339	ACH-000153	NCIH2052_PLEURA	Lung	chr5	1221816	1225232	SLC6A19	5_1223845_A_G	28	69			97		CCLE_WGS	0.28866		0.405797
340	ACH-000153	NCIH2052_PLEURA	Lung	chr5	1221816	1225232	SLC6A19	5_1224174_T_C	51	26			77		CCLE_WGS	0.662338		1.96154
341	ACH-000153	NCIH2052_PLEURA	Lung	chr5	1221816	1225232	SLC6A19	5_1224083_C_A	42	26			68		CCLE_WGS	0.617647		1.61538
342	ACH-000153	NCIH2052_PLEURA	Lung	chr5	1221816	1225232	SLC6A19	5_1223772_T_C	65	39			104		CCLE_WGS	0.625		1.66667
343	ACH-000153	NCIH2052_PLEURA	Lung	chr5	1221816	1225232	SLC6A19	5_1224285_G_A	69	35			104		CCLE_WGS	0.663462		1.97143
344	ACH-000153	NCIH2052_PLEURA	Lung	chr5	1221816	1225232	SLC6A19	5_1224405_A_G	46	21			67		CCLE_WGS	0.686567		2.19048
345	ACH-000153	NCIH2052_PLEURA	Lung	chr5	1221816	1225232	SLC6A19	5_1224001_T_C	37	27			64		CCLE_WGS	0.578125		1.37037
346	ACH-000153	NCIH2052_PLEURA	Lung	chr5	1213578	1213688	SLC6A19	5_1213668_G_A	55	21			76		CCLE_WGS	0.723684		2.61905
347	ACH-000156	MHHCALL4_HAEMATOPOIETIC_AND_LYMPHOID_TISSUE	Blood	chr5	1208861	1209001	SLC6A19	5_1208964_T_C	29	23			52		CCLE_WES	0.557692		1.26087
348	ACH-000159	OSRC2_KIDNEY	Kidney	chr5	1221816	1225232	SLC6A19	5_1225121_C_T	18	85			103		CCLE_WGS	0.174757		0.211765
349	ACH-000159	OSRC2_KIDNEY	Kidney	chr5	1221816	1225232	SLC6A19	5_1224795_G_C	15	85			100		CCLE_WGS	0.15		0.176471
350	ACH-000159	OSRC2_KIDNEY	Kidney	chr5	1221816	1225232	SLC6A19	5_1224490_G_T	14	74			88		CCLE_WGS	0.159091		0.189189
351	ACH-000159	OSRC2_KIDNEY	Kidney	chr5	1221816	1225232	SLC6A19	5_1224051_C_T	13	72			85		CCLE_WGS	0.152941		0.180556
352	ACH-000159	OSRC2_KIDNEY	Kidney	chr5	1221816	1225232	SLC6A19	5_1224003_C_T	18	48			66		CCLE_WGS	0.272727		0.375
353	ACH-000159	OSRC2_KIDNEY	Kidney	chr5	1221816	1225232	SLC6A19	5_1223940_A_G	15	63			78		CCLE_WGS	0.192308		0.238095
354	ACH-000159	OSRC2_KIDNEY	Kidney	chr5	1221816	1225232	SLC6A19	5_1223835_T_C	24	76			100		CCLE_WGS	0.24		0.315789
355	ACH-000159	OSRC2_KIDNEY	Kidney	chr5	1221816	1225232	SLC6A19	5_1223730_G_A	20	101			121		CCLE_WGS	0.165289		0.19802
356	ACH-000159	OSRC2_KIDNEY	Kidney	chr5	1216673	1217060	SLC6A19	5_1216775_A_G	15	62			77		CCLE_WGS	0.194805		0.241935
357	ACH-000159	OSRC2_KIDNEY	Kidney	chr5	1208861	1209001	SLC6A19	5_1208964_T_C	9	43			52		CCLE_WGS	0.173077		0.209302
358	ACH-000163	SW579_THYROID	Thyroid	chr5	1221816	1225232	SLC6A19	5_1224001_T_C	9	11			20		CCLE_WGS	0.45		0.818182
359	ACH-000163	SW579_THYROID	Thyroid	chr5	1221816	1225232	SLC6A19	5_1224003_C_T	11	9			20		CCLE_WGS	0.55		1.22222
360	ACH-000163	SW579_THYROID	Thyroid	chr5	1221816	1225232	SLC6A19	5_1223940_A_G	18	27			45		CCLE_WGS	0.4		0.666667
361	ACH-000163	SW579_THYROID	Thyroid	chr5	1221816	1225232	SLC6A19	5_1223845_A_G	27	31			58		CCLE_WGS	0.465517		0.870968
362	ACH-000163	SW579_THYROID	Thyroid	chr5	1216673	1217060	SLC6A19	5_1216900_G_A	48	45			93		CCLE_WES	0.516129		1.06667
363	ACH-000163	SW579_THYROID	Thyroid	chr5	1221816	1225232	SLC6A19	5_1223835_T_C	29	25			54		CCLE_WGS	0.537037		1.16
364	ACH-000163	SW579_THYROID	Thyroid	chr5	1221816	1225232	SLC6A19	5_1223730_G_A	14	32			46		CCLE_WGS	0.304348		0.4375
365	ACH-000163	SW579_THYROID	Thyroid	chr5	1221816	1225232	SLC6A19	5_1222499_T_C	33	31			64		CCLE_WGS	0.515625		1.06452
366	ACH-000163	SW579_THYROID	Thyroid	chr5	1216673	1217060	SLC6A19	5_1216900_G_A	34	19			53		CCLE_WGS	0.641509		1.78947
367	ACH-000163	SW579_THYROID	Thyroid	chr5	1221816	1225232	SLC6A19	5_1225121_C_T	31	22			53		CCLE_WGS	0.584906		1.40909
368	ACH-000164	PANC1_PANCREAS	Pancreas	chr5	1221816	1225232	SLC6A19	5_1223700_C_T	25	9			34		CCLE_WGS	0.735294		2.77778
369	ACH-000164	PANC1_PANCREAS	Pancreas	chr5	1221816	1225232	SLC6A19	5_1222672_T_C	22	22			44		CCLE_WGS	0.5		1
370	ACH-000165	HS751T_FIBROBLAST	Fibroblast	chr5	1210559	1210696	SLC6A19	5_1210677_G_A	34	27			61		CCLE_WES	0.557377		1.25926
371	ACH-000165	HS751T_FIBROBLAST	Fibroblast	chr5	1216673	1217060	SLC6A19	5_1216900_G_A	65	54			119		CCLE_WES	0.546218		1.2037
372	ACH-000166	KASUMI6_HAEMATOPOIETIC_AND_LYMPHOID_TISSUE	Blood	chr5	1208861	1209001	SLC6A19	5_1208964_T_C	16	15			31		CCLE_WES	0.516129		1.06667
373	ACH-000166	KASUMI6_HAEMATOPOIETIC_AND_LYMPHOID_TISSUE	Blood	chr5	1213578	1213688	SLC6A19	5_1213668_G_A	13	11			24		CCLE_WES	0.541667		1.18182
374	ACH-000175	TE159T_FIBROBLAST	Fibroblast	chr5	1216673	1217060	SLC6A19	5_1216900_G_A	39	27			66		CCLE_WES	0.590909		1.44444
375	ACH-000175	TE159T_FIBROBLAST	Fibroblast	chr5	1208861	1209001	SLC6A19	5_1208964_T_C	20	17			37		CCLE_WES	0.540541		1.17647
376	ACH-000177	NCIH660_PROSTATE	Prostate	chr5	1216673	1217060	SLC6A19	5_1216900_G_A	52	49			101		CCLE_WES	0.514851		1.06122
377	ACH-000177	NCIH660_PROSTATE	Prostate	chr5	1208861	1209001	SLC6A19	5_1208964_T_C	27	37			64		CCLE_WES	0.421875		0.72973
378	ACH-000179	NCIH1618_LUNG	Lung	chr5	1208861	1209001	SLC6A19	5_1208964_T_C	17	24			41		CCLE_WGS	0.414634		0.708333
379	ACH-000179	NCIH1618_LUNG	Lung	chr5	1221816	1225232	SLC6A19	5_1223730_G_A	37	29			66		CCLE_WGS	0.560606		1.27586
380	ACH-000179	NCIH1618_LUNG	Lung	chr5	1221816	1225232	SLC6A19	5_1222499_T_C	32	33			65		CCLE_WGS	0.492308		0.969697
381	ACH-000179	NCIH1618_LUNG	Lung	chr5	1221816	1225232	SLC6A19	5_1223940_A_G	39	29			68		CCLE_WGS	0.573529		1.34483
382	ACH-000179	NCIH1618_LUNG	Lung	chr5	1221816	1225232	SLC6A19	5_1224001_T_C	33	8			41		CCLE_WGS	0.804878		4.125
383	ACH-000179	NCIH1618_LUNG	Lung	chr5	1221816	1225232	SLC6A19	5_1225121_C_T	26	38			64		CCLE_WGS	0.40625		0.684211
384	ACH-000179	NCIH1618_LUNG	Lung	chr5	1221816	1225232	SLC6A19	5_1223835_T_C	29	34			63		CCLE_WGS	0.460317		0.852941
385	ACH-000179	NCIH1618_LUNG	Lung	chr5	1221816	1225232	SLC6A19	5_1223845_A_G	37	33			70		CCLE_WGS	0.528571		1.12121
386	ACH-000180	HS839T_FIBROBLAST	Fibroblast	chr5	1216673	1217060	SLC6A19	5_1216900_G_A	40	47			87		CCLE_WES	0.45977		0.851064
387	ACH-000180	HS839T_FIBROBLAST	Fibroblast	chr5	1208861	1209001	SLC6A19	5_1208964_T_C	23	22			45		CCLE_WES	0.511111		1.04545
388	ACH-000184	HS343T_FIBROBLAST	Fibroblast	chr5	1208861	1209001	SLC6A19	5_1208964_T_C	20	20			40		CCLE_WES	0.5		1
389	ACH-000184	HS343T_FIBROBLAST	Fibroblast	chr5	1216673	1217060	SLC6A19	5_1216900_G_A	25	32			57		CCLE_WES	0.438596		0.78125
390	ACH-000187	CORL311_LUNG	Lung	chr5	1208861	1209001	SLC6A19	5_1208964_T_C	30	35			65		CCLE_WES	0.461538		0.857143
391	ACH-000187	CORL311_LUNG	Lung	chr5	1208861	1209001	SLC6A19	5_1208964_T_C	17	16			33		CCLE_WGS	0.515152		1.0625
392	ACH-000188	SCC25_UPPER_AERODIGESTIVE_TRACT	Upper aerodigestive	chr5	1213578	1213688	SLC6A19	5_1213668_G_A	34	11			45		CCLE_WGS	0.755556		3.09091
393	ACH-000188	SCC25_UPPER_AERODIGESTIVE_TRACT	Upper aerodigestive	chr5	1221816	1225232	SLC6A19	5_1224174_T_C	9	53			62		CCLE_WGS	0.145161		0.169811
394	ACH-000188	SCC25_UPPER_AERODIGESTIVE_TRACT	Upper aerodigestive	chr5	1221816	1225232	SLC6A19	5_1222672_T_C	37	10			47		CCLE_WGS	0.787234		3.7
395	ACH-000188	SCC25_UPPER_AERODIGESTIVE_TRACT	Upper aerodigestive	chr5	1221816	1225232	SLC6A19	5_1223062_G_T	13	39			52		CCLE_WGS	0.25		0.333333
396	ACH-000188	SCC25_UPPER_AERODIGESTIVE_TRACT	Upper aerodigestive	chr5	1221816	1225232	SLC6A19	5_1223772_T_C	46	65			111		CCLE_WGS	0.414414		0.707692
397	ACH-000188	SCC25_UPPER_AERODIGESTIVE_TRACT	Upper aerodigestive	chr5	1221816	1225232	SLC6A19	5_1223835_T_C	53	24			77		CCLE_WGS	0.688312		2.20833
398	ACH-000188	SCC25_UPPER_AERODIGESTIVE_TRACT	Upper aerodigestive	chr5	1221816	1225232	SLC6A19	5_1225121_C_T	44	12			56		CCLE_WGS	0.785714		3.66667
399	ACH-000188	SCC25_UPPER_AERODIGESTIVE_TRACT	Upper aerodigestive	chr5	1221816	1225232	SLC6A19	5_1224285_G_A	10	41			51		CCLE_WGS	0.196078		0.243902
400	ACH-000188	SCC25_UPPER_AERODIGESTIVE_TRACT	Upper aerodigestive	chr5	1221816	1225232	SLC6A19	5_1225043_C_T	10	36			46		CCLE_WGS	0.217391		0.277778
401	ACH-000188	SCC25_UPPER_AERODIGESTIVE_TRACT	Upper aerodigestive	chr5	1221816	1225232	SLC6A19	5_1224405_A_G	15	55			70		CCLE_WGS	0.214286		0.272727
402	ACH-000192	MFE280_ENDOMETRIUM	Uterus	chr5	1221816	1225232	SLC6A19	5_1223772_T_C	38	58			96		CCLE_WGS	0.395833		0.655172
403	ACH-000192	MFE280_ENDOMETRIUM	Uterus	chr5	1213578	1213688	SLC6A19	5_1213668_G_A	11	12			23		CCLE_WGS	0.478261		0.916667
404	ACH-000192	MFE280_ENDOMETRIUM	Uterus	chr5	1201710	1201967	SLC6A19	5_1201921_C_T	10	13			23		CCLE_WGS	0.434783		0.769231
405	ACH-000193	KARPAS620_HAEMATOPOIETIC_AND_LYMPHOID_TISSUE	Plasma cell	chr5	1208861	1209001	SLC6A19	5_1208964_T_C	19	16			35		CCLE_WES	0.542857		1.1875
406	ACH-000196	HCC1599_BREAST	Breast	chr5	1221816	1225232	SLC6A19	5_1223763_C_T	14	31			45		CCLE_WGS	0.311111		0.451613
407	ACH-000196	HCC1599_BREAST	Breast	chr5	1221816	1225232	SLC6A19	5_1223772_T_C	29	14			43		CCLE_WGS	0.674419		2.07143
408	ACH-000196	HCC1599_BREAST	Breast	chr5	1221816	1225232	SLC6A19	5_1223786_T_C	25	15			40		CCLE_WGS	0.625		1.66667
409	ACH-000198	EOL1_HAEMATOPOIETIC_AND_LYMPHOID_TISSUE	Blood	chr5	1221816	1225232	SLC6A19	5_1223845_A_G	13	16			29		CCLE_WGS	0.448276		0.8125
410	ACH-000198	EOL1_HAEMATOPOIETIC_AND_LYMPHOID_TISSUE	Blood	chr5	1221816	1225232	SLC6A19	5_1222499_T_C	17	17			34		CCLE_WGS	0.5		1
411	ACH-000198	EOL1_HAEMATOPOIETIC_AND_LYMPHOID_TISSUE	Blood	chr5	1221816	1225232	SLC6A19	5_1223062_G_T	14	19			33		CCLE_WGS	0.424242		0.736842
412	ACH-000198	EOL1_HAEMATOPOIETIC_AND_LYMPHOID_TISSUE	Blood	chr5	1221816	1225232	SLC6A19	5_1223772_T_C	27	8			35		CCLE_WGS	0.771429		3.375
413	ACH-000198	EOL1_HAEMATOPOIETIC_AND_LYMPHOID_TISSUE	Blood	chr5	1216673	1217060	SLC6A19	5_1216900_G_A	18	20			38		CCLE_WGS	0.473684		0.9
414	ACH-000198	EOL1_HAEMATOPOIETIC_AND_LYMPHOID_TISSUE	Blood	chr5	1221816	1225232	SLC6A19	5_1224083_C_A	13	13			26		CCLE_WGS	0.5		1
415	ACH-000198	EOL1_HAEMATOPOIETIC_AND_LYMPHOID_TISSUE	Blood	chr5	1221816	1225232	SLC6A19	5_1224405_A_G	26	19			45		CCLE_WGS	0.577778		1.36842
416	ACH-000198	EOL1_HAEMATOPOIETIC_AND_LYMPHOID_TISSUE	Blood	chr5	1221816	1225232	SLC6A19	5_1224174_T_C	21	15			36		CCLE_WGS	0.583333		1.4
417	ACH-000198	EOL1_HAEMATOPOIETIC_AND_LYMPHOID_TISSUE	Blood	chr5	1221816	1225232	SLC6A19	5_1224285_G_A	17	12			29		CCLE_WGS	0.586207		1.41667
418	ACH-000198	EOL1_HAEMATOPOIETIC_AND_LYMPHOID_TISSUE	Blood	chr5	1221816	1225232	SLC6A19	5_1224001_T_C	19	16			35		CCLE_WGS	0.542857		1.1875
419	ACH-000199	HS255T_FIBROBLAST	Fibroblast	chr5	1216673	1217060	SLC6A19	5_1216900_G_A	38	33			71		CCLE_WES	0.535211		1.15152
420	ACH-000201	A204_SOFT_TISSUE	Soft tissue	chr5	1221816	1225232	SLC6A19	5_1223845_A_G	21	18			39		CCLE_WGS	0.538462		1.16667
421	ACH-000201	A204_SOFT_TISSUE	Soft tissue	chr5	1216673	1217060	SLC6A19	5_1216900_G_A	23	21			44		CCLE_WGS	0.522727		1.09524
422	ACH-000201	A204_SOFT_TISSUE	Soft tissue	chr5	1221816	1225232	SLC6A19	5_1222499_T_C	20	13			33		CCLE_WGS	0.606061		1.53846
423	ACH-000201	A204_SOFT_TISSUE	Soft tissue	chr5	1221816	1225232	SLC6A19	5_1225121_C_T	22	18			40		CCLE_WGS	0.55		1.22222
424	ACH-000201	A204_SOFT_TISSUE	Soft tissue	chr5	1221816	1225232	SLC6A19	5_1224003_C_T	9	17			26		CCLE_WGS	0.346154		0.529412
425	ACH-000201	A204_SOFT_TISSUE	Soft tissue	chr5	1221816	1225232	SLC6A19	5_1224001_T_C	9	17			26		CCLE_WGS	0.346154		0.529412
426	ACH-000201	A204_SOFT_TISSUE	Soft tissue	chr5	1221816	1225232	SLC6A19	5_1223835_T_C	21	17			38		CCLE_WGS	0.552632		1.23529
427	ACH-000201	A204_SOFT_TISSUE	Soft tissue	chr5	1221816	1225232	SLC6A19	5_1223940_A_G	13	18			31		CCLE_WGS	0.419355		0.722222
428	ACH-000201	A204_SOFT_TISSUE	Soft tissue	chr5	1221816	1225232	SLC6A19	5_1223700_C_T	11	12			23		CCLE_WGS	0.478261		0.916667
429	ACH-000203	NH6_AUTONOMIC_GANGLIA	Peripheral nervous system	chr5	1208861	1209001	SLC6A19	5_1208964_T_C	9	19			28		CCLE_WES	0.321429		0.473684
430	ACH-000203	NH6_AUTONOMIC_GANGLIA	Peripheral nervous system	chr5	1216673	1217060	SLC6A19	5_1216900_G_A	40	36			76		CCLE_WES	0.526316		1.11111
431	ACH-000204	LP1_HAEMATOPOIETIC_AND_LYMPHOID_TISSUE	Plasma cell	chr5	1216673	1217060	SLC6A19	5_1216900_G_A	46	62			108		CCLE_WES	0.425926		0.741935
432	ACH-000205	PK59_PANCREAS	Pancreas	chr5	1213578	1213688	SLC6A19	5_1213668_G_A	8	53			61		CCLE_WES	0.131148		0.150943
433	ACH-000207	DETROIT562_UPPER_AERODIGESTIVE_TRACT	Upper aerodigestive	chr5	1221816	1225232	SLC6A19	5_1222499_T_C	26	36			62		CCLE_WGS	0.419355		0.722222
434	ACH-000207	DETROIT562_UPPER_AERODIGESTIVE_TRACT	Upper aerodigestive	chr5	1221816	1225232	SLC6A19	5_1223940_A_G	32	31			63		CCLE_WGS	0.507937		1.03226
435	ACH-000207	DETROIT562_UPPER_AERODIGESTIVE_TRACT	Upper aerodigestive	chr5	1221816	1225232	SLC6A19	5_1223835_T_C	40	44			84		CCLE_WGS	0.47619		0.909091
436	ACH-000207	DETROIT562_UPPER_AERODIGESTIVE_TRACT	Upper aerodigestive	chr5	1221816	1225232	SLC6A19	5_1224001_T_C	25	23			48		CCLE_WGS	0.520833		1.08696
437	ACH-000207	DETROIT562_UPPER_AERODIGESTIVE_TRACT	Upper aerodigestive	chr5	1221816	1225232	SLC6A19	5_1225121_C_T	45	37			82		CCLE_WGS	0.54878		1.21622
438	ACH-000207	DETROIT562_UPPER_AERODIGESTIVE_TRACT	Upper aerodigestive	chr5	1216673	1217060	SLC6A19	5_1216900_G_A	26	31			57		CCLE_WGS	0.45614		0.83871
439	ACH-000207	DETROIT562_UPPER_AERODIGESTIVE_TRACT	Upper aerodigestive	chr5	1221816	1225232	SLC6A19	5_1223730_G_A	30	41			71		CCLE_WGS	0.422535		0.731707
440	ACH-000207	DETROIT562_UPPER_AERODIGESTIVE_TRACT	Upper aerodigestive	chr5	1221816	1225232	SLC6A19	5_1223845_A_G	42	36			78		CCLE_WGS	0.538462		1.16667
441	ACH-000209	SNU1079_BILIARY_TRACT	Bile duct	chr5	1216673	1217060	SLC6A19	5_1216900_G_A	39	72			111		CCLE_WES	0.351351		0.541667
442	ACH-000210	CADOES1_BONE	Bone	chr5	1208861	1209001	SLC6A19	5_1208964_T_C	18	23			41		CCLE_WES	0.439024		0.782609
443	ACH-000210	CADOES1_BONE	Bone	chr5	1216673	1217060	SLC6A19	5_1216775_A_G	26	25			51		CCLE_WES	0.509804		1.04
444	ACH-000211	DAOY_CENTRAL_NERVOUS_SYSTEM	Central nervous system	chr5	1221816	1225232	SLC6A19	5_1224051_C_T	21	10			31		CCLE_WGS	0.677419		2.1
445	ACH-000211	DAOY_CENTRAL_NERVOUS_SYSTEM	Central nervous system	chr5	1221816	1225232	SLC6A19	5_1225121_C_T	25	16			41		CCLE_WGS	0.609756		1.5625
446	ACH-000211	DAOY_CENTRAL_NERVOUS_SYSTEM	Central nervous system	chr5	1221816	1225232	SLC6A19	5_1224003_C_T	22	9			31		CCLE_WGS	0.709677		2.44444
447	ACH-000211	DAOY_CENTRAL_NERVOUS_SYSTEM	Central nervous system	chr5	1221816	1225232	SLC6A19	5_1224001_T_C	20	10			30		CCLE_WGS	0.666667		2
448	ACH-000211	DAOY_CENTRAL_NERVOUS_SYSTEM	Central nervous system	chr5	1221816	1225232	SLC6A19	5_1223940_A_G	22	16			38		CCLE_WGS	0.578947		1.375
449	ACH-000211	DAOY_CENTRAL_NERVOUS_SYSTEM	Central nervous system	chr5	1221816	1225232	SLC6A19	5_1223835_T_C	23	29			52		CCLE_WGS	0.442308		0.793103
450	ACH-000211	DAOY_CENTRAL_NERVOUS_SYSTEM	Central nervous system	chr5	1221816	1225232	SLC6A19	5_1223730_G_A	24	26			50		CCLE_WGS	0.48		0.923077
451	ACH-000211	DAOY_CENTRAL_NERVOUS_SYSTEM	Central nervous system	chr5	1216673	1217060	SLC6A19	5_1216775_A_G	19	19			38		CCLE_WGS	0.5		1
452	ACH-000211	DAOY_CENTRAL_NERVOUS_SYSTEM	Central nervous system	chr5	1221816	1225232	SLC6A19	5_1224490_G_T	22	21			43		CCLE_WGS	0.511628		1.04762
453	ACH-000211	DAOY_CENTRAL_NERVOUS_SYSTEM	Central nervous system	chr5	1221816	1225232	SLC6A19	5_1224795_G_C	23	28			51		CCLE_WGS	0.45098		0.821429
454	ACH-000212	CAL120_BREAST	Breast	chr5	1208861	1209001	SLC6A19	5_1208964_T_C	31	14			45		CCLE_WGS	0.688889		2.21429
455	ACH-000214	HS675T_FIBROBLAST	Fibroblast	chr5	1208861	1209001	SLC6A19	5_1208964_T_C	24	19			43		CCLE_WES	0.55814		1.26316
456	ACH-000214	HS675T_FIBROBLAST	Fibroblast	chr5	1213578	1213688	SLC6A19	5_1213668_G_A	19	13			32		CCLE_WES	0.59375		1.46154
457	ACH-000218	PL21_HAEMATOPOIETIC_AND_LYMPHOID_TISSUE	Blood	chr5	1208861	1209001	SLC6A19	5_1208964_T_C	28	18			46		CCLE_WES	0.608696		1.55556
458	ACH-000218	PL21_HAEMATOPOIETIC_AND_LYMPHOID_TISSUE	Blood	chr5	1213578	1213688	SLC6A19	5_1213668_G_A	21	17			38		CCLE_WES	0.552632		1.23529
459	ACH-000218	PL21_HAEMATOPOIETIC_AND_LYMPHOID_TISSUE	Blood	chr5	1216673	1217060	SLC6A19	5_1216775_A_G	47	31			78		CCLE_WES	0.602564		1.51613
460	ACH-000219	A375_SKIN	Skin	chr5	1221816	1225232	SLC6A19	5_1224795_G_C	21	33			54		CCLE_WGS	0.388889		0.636364
461	ACH-000219	A375_SKIN	Skin	chr5	1221816	1225232	SLC6A19	5_1224490_G_T	15	28			43		CCLE_WGS	0.348837		0.535714
462	ACH-000219	A375_SKIN	Skin	chr5	1221816	1225232	SLC6A19	5_1224051_C_T	13	22			35		CCLE_WGS	0.371429		0.590909
463	ACH-000219	A375_SKIN	Skin	chr5	1221816	1225232	SLC6A19	5_1223845_A_G	14	21			35		CCLE_WGS	0.4		0.666667
464	ACH-000219	A375_SKIN	Skin	chr5	1221816	1225232	SLC6A19	5_1222499_T_C	18	46			64		CCLE_WGS	0.28125		0.391304
465	ACH-000219	A375_SKIN	Skin	chr5	1216673	1217060	SLC6A19	5_1216900_G_A	22	26			48		CCLE_WGS	0.458333		0.846154
466	ACH-000219	A375_SKIN	Skin	chr5	1216673	1217060	SLC6A19	5_1216775_A_G	11	30			41		CCLE_WGS	0.268293		0.366667
467	ACH-000223	HCC1937_BREAST	Breast	chr5	1221816	1225232	SLC6A19	5_1224001_T_C	51	22			73		CCLE_WGS	0.69863		2.31818
468	ACH-000223	HCC1937_BREAST	Breast	chr5	1221816	1225232	SLC6A19	5_1222499_T_C	56	72			128		CCLE_WGS	0.4375		0.777778
469	ACH-000223	HCC1937_BREAST	Breast	chr5	1221816	1225232	SLC6A19	5_1224003_C_T	54	22			76		CCLE_WGS	0.710526		2.45455
470	ACH-000223	HCC1937_BREAST	Breast	chr5	1221816	1225232	SLC6A19	5_1225121_C_T	60	43			103		CCLE_WGS	0.582524		1.39535
471	ACH-000223	HCC1937_BREAST	Breast	chr5	1221816	1225232	SLC6A19	5_1223700_C_T	58	24			82		CCLE_WGS	0.707317		2.41667
472	ACH-000223	HCC1937_BREAST	Breast	chr5	1221816	1225232	SLC6A19	5_1223940_A_G	44	34			78		CCLE_WGS	0.564103		1.29412
473	ACH-000223	HCC1937_BREAST	Breast	chr5	1216673	1217060	SLC6A19	5_1216900_G_A	29	69			98		CCLE_WGS	0.295918		0.42029
474	ACH-000223	HCC1937_BREAST	Breast	chr5	1221816	1225232	SLC6A19	5_1223845_A_G	50	45			95		CCLE_WGS	0.526316		1.11111
475	ACH-000223	HCC1937_BREAST	Breast	chr5	1221816	1225232	SLC6A19	5_1223835_T_C	44	44			88		CCLE_WGS	0.5		1
476	ACH-000226	SUPM2_HAEMATOPOIETIC_AND_LYMPHOID_TISSUE	Lymphocyte	chr5	1213578	1213688	SLC6A19	5_1213668_G_A	27	15			42		CCLE_WES	0.642857		1.8
477	ACH-000226	SUPM2_HAEMATOPOIETIC_AND_LYMPHOID_TISSUE	Lymphocyte	chr5	1216673	1217060	SLC6A19	5_1216900_G_A	87	45			132		CCLE_WES	0.659091		1.93333
478	ACH-000228	BICR31_UPPER_AERODIGESTIVE_TRACT	Upper aerodigestive	chr5	1216673	1217060	SLC6A19	5_1216775_A_G	33	76			109		CCLE_WES	0.302752		0.434211
479	ACH-000232	U251MG_CENTRAL_NERVOUS_SYSTEM	Central nervous system	chr5	1221816	1225232	SLC6A19	5_1223845_A_G	13	31			44		CCLE_WGS	0.295455		0.419355
480	ACH-000232	U251MG_CENTRAL_NERVOUS_SYSTEM	Central nervous system	chr5	1221816	1225232	SLC6A19	5_1224174_T_C	37	11			48		CCLE_WGS	0.770833		3.36364
481	ACH-000232	U251MG_CENTRAL_NERVOUS_SYSTEM	Central nervous system	chr5	1221816	1225232	SLC6A19	5_1224285_G_A	23	13			36		CCLE_WGS	0.638889		1.76923
482	ACH-000232	U251MG_CENTRAL_NERVOUS_SYSTEM	Central nervous system	chr5	1221816	1225232	SLC6A19	5_1224083_C_A	27	13			40		CCLE_WGS	0.675		2.07692
483	ACH-000232	U251MG_CENTRAL_NERVOUS_SYSTEM	Central nervous system	chr5	1216673	1217060	SLC6A19	5_1216900_G_A	14	21			35		CCLE_WGS	0.4		0.666667
484	ACH-000232	U251MG_CENTRAL_NERVOUS_SYSTEM	Central nervous system	chr5	1213578	1213688	SLC6A19	5_1213668_G_A	23	8			31		CCLE_WGS	0.741935		2.875
485	ACH-000232	U251MG_CENTRAL_NERVOUS_SYSTEM	Central nervous system	chr5	1221816	1225232	SLC6A19	5_1224001_T_C	19	8			27		CCLE_WGS	0.703704		2.375
486	ACH-000232	U251MG_CENTRAL_NERVOUS_SYSTEM	Central nervous system	chr5	1221816	1225232	SLC6A19	5_1223062_G_T	35	11			46		CCLE_WGS	0.76087		3.18182
487	ACH-000232	U251MG_CENTRAL_NERVOUS_SYSTEM	Central nervous system	chr5	1221816	1225232	SLC6A19	5_1222499_T_C	11	21			32		CCLE_WGS	0.34375		0.52381
488	ACH-000232	U251MG_CENTRAL_NERVOUS_SYSTEM	Central nervous system	chr5	1221816	1225232	SLC6A19	5_1224405_A_G	36	15			51		CCLE_WGS	0.705882		2.4
489	ACH-000232	U251MG_CENTRAL_NERVOUS_SYSTEM	Central nervous system	chr5	1221816	1225232	SLC6A19	5_1222989_G_A	30	9			39		CCLE_WGS	0.769231		3.33333
490	ACH-000234	CAKI2_KIDNEY	Kidney	chr5	1216673	1217060	SLC6A19	5_1216900_G_A	87	36			123		CCLE_WES	0.707317		2.41667
491	ACH-000238	SCC4_UPPER_AERODIGESTIVE_TRACT	Upper aerodigestive	chr5	1216673	1217060	SLC6A19	5_1216900_G_A	69	77			146		CCLE_WGS	0.472603		0.896104
492	ACH-000238	SCC4_UPPER_AERODIGESTIVE_TRACT	Upper aerodigestive	chr5	1221816	1225232	SLC6A19	5_1222499_T_C	40	63			103		CCLE_WGS	0.38835		0.634921
493	ACH-000238	SCC4_UPPER_AERODIGESTIVE_TRACT	Upper aerodigestive	chr5	1221816	1225232	SLC6A19	5_1225121_C_T	62	41			103		CCLE_WGS	0.601942		1.5122
494	ACH-000238	SCC4_UPPER_AERODIGESTIVE_TRACT	Upper aerodigestive	chr5	1221816	1225232	SLC6A19	5_1223835_T_C	56	36			92		CCLE_WGS	0.608696		1.55556
495	ACH-000238	SCC4_UPPER_AERODIGESTIVE_TRACT	Upper aerodigestive	chr5	1221816	1225232	SLC6A19	5_1223845_A_G	38	55			93		CCLE_WGS	0.408602		0.690909
496	ACH-000238	SCC4_UPPER_AERODIGESTIVE_TRACT	Upper aerodigestive	chr5	1221816	1225232	SLC6A19	5_1224003_C_T	68	20			88		CCLE_WGS	0.772727		3.4
497	ACH-000238	SCC4_UPPER_AERODIGESTIVE_TRACT	Upper aerodigestive	chr5	1221816	1225232	SLC6A19	5_1223940_A_G	71	33			104		CCLE_WGS	0.682692		2.15152
498	ACH-000238	SCC4_UPPER_AERODIGESTIVE_TRACT	Upper aerodigestive	chr5	1221816	1225232	SLC6A19	5_1224001_T_C	68	21			89		CCLE_WGS	0.764045		3.2381
499	ACH-000238	SCC4_UPPER_AERODIGESTIVE_TRACT	Upper aerodigestive	chr5	1221816	1225232	SLC6A19	5_1223700_C_T	57	27			84		CCLE_WGS	0.678571		2.11111
500	ACH-000243	DANG_PANCREAS	Pancreas	chr5	1221816	1225232	SLC6A19	5_1225121_C_T	25	28			53		CCLE_WGS	0.471698		0.892857
501	ACH-000243	DANG_PANCREAS	Pancreas	chr5	1221816	1225232	SLC6A19	5_1223062_G_T	32	27			59		CCLE_WGS	0.542373		1.18519
502	ACH-000243	DANG_PANCREAS	Pancreas	chr5	1221816	1225232	SLC6A19	5_1223700_C_T	38	16			54		CCLE_WGS	0.703704		2.375
503	ACH-000243	DANG_PANCREAS	Pancreas	chr5	1221816	1225232	SLC6A19	5_1223772_T_C	22	44			66		CCLE_WGS	0.333333		0.5
504	ACH-000243	DANG_PANCREAS	Pancreas	chr5	1221816	1225232	SLC6A19	5_1223835_T_C	17	26			43		CCLE_WGS	0.395349		0.653846
505	ACH-000243	DANG_PANCREAS	Pancreas	chr5	1221816	1225232	SLC6A19	5_1224405_A_G	31	24			55		CCLE_WGS	0.563636		1.29167
506	ACH-000243	DANG_PANCREAS	Pancreas	chr5	1221816	1225232	SLC6A19	5_1224083_C_A	32	15			47		CCLE_WGS	0.680851		2.13333
507	ACH-000243	DANG_PANCREAS	Pancreas	chr5	1221816	1225232	SLC6A19	5_1223940_A_G	26	31			57		CCLE_WGS	0.45614		0.83871
508	ACH-000243	DANG_PANCREAS	Pancreas	chr5	1221816	1225232	SLC6A19	5_1224174_T_C	35	32			67		CCLE_WGS	0.522388		1.09375
509	ACH-000243	DANG_PANCREAS	Pancreas	chr5	1221816	1225232	SLC6A19	5_1224285_G_A	21	33			54		CCLE_WGS	0.388889		0.636364
510	ACH-000245	BL41_HAEMATOPOIETIC_AND_LYMPHOID_TISSUE	Lymphocyte	chr5	1208861	1209001	SLC6A19	5_1208964_T_C	26	33			59		CCLE_WES	0.440678		0.787879
511	ACH-000245	BL41_HAEMATOPOIETIC_AND_LYMPHOID_TISSUE	Lymphocyte	chr5	1216673	1217060	SLC6A19	5_1216900_G_A	48	53			101		CCLE_WES	0.475248		0.90566
512	ACH-000247	OCUM1_STOMACH	Gastric	chr5	1216673	1217060	SLC6A19	5_1216775_A_G	24	17	4	4	41	8	CCLE_WGS	0.585366	0.5	1.41176	1	0.708333	0.714286	0
513	ACH-000247	OCUM1_STOMACH	Gastric	chr5	1221816	1225232	SLC6A19	5_1222776_G_A	20	21	10	4	41	14	CCLE_WGS	0.487805	0.714286	0.952381	2.5	2.625	2.44715	0
514	ACH-000248	AU565_BREAST	Breast	chr5	1221816	1225232	SLC6A19	5_1224001_T_C	52	10			62		CCLE_WGS	0.83871		5.2
515	ACH-000248	AU565_BREAST	Breast	chr5	1221816	1225232	SLC6A19	5_1223845_A_G	13	48			61		CCLE_WGS	0.213115		0.270833
516	ACH-000248	AU565_BREAST	Breast	chr5	1221816	1225232	SLC6A19	5_1223835_T_C	43	12			55		CCLE_WGS	0.781818		3.58333
517	ACH-000248	AU565_BREAST	Breast	chr5	1221816	1225232	SLC6A19	5_1223730_G_A	46	17			63		CCLE_WGS	0.730159		2.70588
518	ACH-000248	AU565_BREAST	Breast	chr5	1221816	1225232	SLC6A19	5_1222499_T_C	15	43			58		CCLE_WGS	0.258621		0.348837
519	ACH-000248	AU565_BREAST	Breast	chr5	1216673	1217060	SLC6A19	5_1216900_G_A	19	60			79		CCLE_WGS	0.240506		0.316667
520	ACH-000248	AU565_BREAST	Breast	chr5	1221816	1225232	SLC6A19	5_1225043_C_T	12	47			59		CCLE_WGS	0.20339		0.255319
521	ACH-000248	AU565_BREAST	Breast	chr5	1221816	1225232	SLC6A19	5_1225121_C_T	55	12			67		CCLE_WGS	0.820896		4.58333
522	ACH-000248	AU565_BREAST	Breast	chr5	1221816	1225232	SLC6A19	5_1224003_C_T	53	11			64		CCLE_WGS	0.828125		4.81818
523	ACH-000248	AU565_BREAST	Breast	chr5	1221816	1225232	SLC6A19	5_1223940_A_G	68	11			79		CCLE_WGS	0.860759		6.18182
524	ACH-000249	CL11_LARGE_INTESTINE	Colorectal	chr5	1216673	1217060	SLC6A19	5_1216900_G_A	28	39			67		CCLE_WES	0.41791		0.717949
525	ACH-000253	COLO201_LARGE_INTESTINE	Colorectal	chr5	1221816	1225232	SLC6A19	5_1224405_A_G	16	16			32		CCLE_WGS	0.5		1
526	ACH-000253	COLO201_LARGE_INTESTINE	Colorectal	chr5	1221816	1225232	SLC6A19	5_1224083_C_A	9	20			29		CCLE_WGS	0.310345		0.45
527	ACH-000253	COLO201_LARGE_INTESTINE	Colorectal	chr5	1221816	1225232	SLC6A19	5_1223062_G_T	20	16			36		CCLE_WGS	0.555556		1.25
528	ACH-000253	COLO201_LARGE_INTESTINE	Colorectal	chr5	1221816	1225232	SLC6A19	5_1223730_G_A	33	26			59		CCLE_WGS	0.559322		1.26923
529	ACH-000253	COLO201_LARGE_INTESTINE	Colorectal	chr5	1221816	1225232	SLC6A19	5_1223772_T_C	40	13			53		CCLE_WGS	0.754717		3.07692
530	ACH-000253	COLO201_LARGE_INTESTINE	Colorectal	chr5	1221816	1225232	SLC6A19	5_1224285_G_A	18	16			34		CCLE_WGS	0.529412		1.125
531	ACH-000253	COLO201_LARGE_INTESTINE	Colorectal	chr5	1221816	1225232	SLC6A19	5_1224174_T_C	15	20			35		CCLE_WGS	0.428571		0.75
532	ACH-000253	COLO201_LARGE_INTESTINE	Colorectal	chr5	1221816	1225232	SLC6A19	5_1225121_C_T	12	17			29		CCLE_WGS	0.413793		0.705882
533	ACH-000253	COLO201_LARGE_INTESTINE	Colorectal	chr5	1221816	1225232	SLC6A19	5_1223940_A_G	20	14			34		CCLE_WGS	0.588235		1.42857
534	ACH-000253	COLO201_LARGE_INTESTINE	Colorectal	chr5	1221816	1225232	SLC6A19	5_1223835_T_C	11	21			32		CCLE_WGS	0.34375		0.52381
535	ACH-000256	COV318_OVARY	Ovary	chr5	1208861	1209001	SLC6A19	5_1208964_T_C	27	8			35		CCLE_WES	0.771429		3.375
536	ACH-000257	CORL279_LUNG	Lung	chr5	1214068	1214180	SLC6A19	5_1214110_G_A	94	23			117		CCLE_WGS	0.803419		4.08696
537	ACH-000257	CORL279_LUNG	Lung	chr5	1221816	1225232	SLC6A19	5_1222480_C_T	29	107			136		CCLE_WGS	0.213235		0.271028
538	ACH-000257	CORL279_LUNG	Lung	chr5	1221816	1225232	SLC6A19	5_1222499_T_C	102	30			132		CCLE_WGS	0.772727		3.4
539	ACH-000257	CORL279_LUNG	Lung	chr5	1221816	1225232	SLC6A19	5_1224795_G_C	101	31			132		CCLE_WGS	0.765152		3.25806
540	ACH-000257	CORL279_LUNG	Lung	chr5	1221816	1225232	SLC6A19	5_1223700_C_T	115	21			136		CCLE_WGS	0.845588		5.47619
541	ACH-000257	CORL279_LUNG	Lung	chr5	1221816	1225232	SLC6A19	5_1223772_T_C	88	32			120		CCLE_WGS	0.733333		2.75
542	ACH-000257	CORL279_LUNG	Lung	chr5	1221816	1225232	SLC6A19	5_1223786_T_C	78	21			99		CCLE_WGS	0.787879		3.71429
543	ACH-000257	CORL279_LUNG	Lung	chr5	1221816	1225232	SLC6A19	5_1223874_A_G	22	32			54		CCLE_WGS	0.407407		0.6875
544	ACH-000257	CORL279_LUNG	Lung	chr5	1221816	1225232	SLC6A19	5_1224001_T_C	22	86			108		CCLE_WGS	0.203704		0.255814
545	ACH-000257	CORL279_LUNG	Lung	chr5	1221816	1225232	SLC6A19	5_1224405_A_G	20	107			127		CCLE_WGS	0.15748		0.186916
546	ACH-000257	CORL279_LUNG	Lung	chr5	1221816	1225232	SLC6A19	5_1222667_G_A	18	92			110		CCLE_WGS	0.163636		0.195652
547	ACH-000258	DU4475_BREAST	Breast	chr5	1208861	1209001	SLC6A19	5_1208964_T_C	20	11			31		CCLE_WGS	0.645161		1.81818
548	ACH-000258	DU4475_BREAST	Breast	chr5	1221816	1225232	SLC6A19	5_1225121_C_T	28	19			47		CCLE_WGS	0.595745		1.47368
549	ACH-000258	DU4475_BREAST	Breast	chr5	1221816	1225232	SLC6A19	5_1224405_A_G	38	41			79		CCLE_WGS	0.481013		0.926829
550	ACH-000258	DU4475_BREAST	Breast	chr5	1221816	1225232	SLC6A19	5_1224285_G_A	29	22			51		CCLE_WGS	0.568627		1.31818
551	ACH-000258	DU4475_BREAST	Breast	chr5	1221816	1225232	SLC6A19	5_1224174_T_C	24	36			60		CCLE_WGS	0.4		0.666667
552	ACH-000258	DU4475_BREAST	Breast	chr5	1221816	1225232	SLC6A19	5_1224083_C_A	21	27			48		CCLE_WGS	0.4375		0.777778
553	ACH-000258	DU4475_BREAST	Breast	chr5	1221816	1225232	SLC6A19	5_1224003_C_T	28	14			42		CCLE_WGS	0.666667		2
554	ACH-000258	DU4475_BREAST	Breast	chr5	1213578	1213688	SLC6A19	5_1213668_G_A	12	15			27		CCLE_WGS	0.444444		0.8
555	ACH-000258	DU4475_BREAST	Breast	chr5	1221816	1225232	SLC6A19	5_1223940_A_G	33	25			58		CCLE_WGS	0.568966		1.32
556	ACH-000258	DU4475_BREAST	Breast	chr5	1221816	1225232	SLC6A19	5_1223835_T_C	43	31			74		CCLE_WGS	0.581081		1.3871
557	ACH-000258	DU4475_BREAST	Breast	chr5	1221816	1225232	SLC6A19	5_1223772_T_C	67	35			102		CCLE_WGS	0.656863		1.91429
558	ACH-000258	DU4475_BREAST	Breast	chr5	1221816	1225232	SLC6A19	5_1223730_G_A	63	16			79		CCLE_WGS	0.797468		3.9375
559	ACH-000258	DU4475_BREAST	Breast	chr5	1221816	1225232	SLC6A19	5_1223062_G_T	32	24			56		CCLE_WGS	0.571429		1.33333
560	ACH-000260	SKNAS_AUTONOMIC_GANGLIA	Peripheral nervous system	chr5	1221816	1225232	SLC6A19	5_1223650_G_T	23	19			42		CCLE_WGS	0.547619		1.21053
561	ACH-000260	SKNAS_AUTONOMIC_GANGLIA	Peripheral nervous system	chr5	1216673	1217060	SLC6A19	5_1216900_G_A	11	14			25		CCLE_WGS	0.44		0.785714
562	ACH-000260	SKNAS_AUTONOMIC_GANGLIA	Peripheral nervous system	chr5	1221816	1225232	SLC6A19	5_1222499_T_C	10	14			24		CCLE_WGS	0.416667		0.714286
563	ACH-000260	SKNAS_AUTONOMIC_GANGLIA	Peripheral nervous system	chr5	1221816	1225232	SLC6A19	5_1223940_A_G	20	19			39		CCLE_WGS	0.512821		1.05263
564	ACH-000260	SKNAS_AUTONOMIC_GANGLIA	Peripheral nervous system	chr5	1221816	1225232	SLC6A19	5_1224001_T_C	19	17			36		CCLE_WGS	0.527778		1.11765
565	ACH-000260	SKNAS_AUTONOMIC_GANGLIA	Peripheral nervous system	chr5	1221816	1225232	SLC6A19	5_1223845_A_G	16	20			36		CCLE_WGS	0.444444		0.8
566	ACH-000260	SKNAS_AUTONOMIC_GANGLIA	Peripheral nervous system	chr5	1221816	1225232	SLC6A19	5_1224003_C_T	21	16			37		CCLE_WGS	0.567568		1.3125
567	ACH-000260	SKNAS_AUTONOMIC_GANGLIA	Peripheral nervous system	chr5	1221816	1225232	SLC6A19	5_1223730_G_A	24	20			44		CCLE_WGS	0.545455		1.2
568	ACH-000260	SKNAS_AUTONOMIC_GANGLIA	Peripheral nervous system	chr5	1221816	1225232	SLC6A19	5_1223835_T_C	25	15			40		CCLE_WGS	0.625		1.66667
569	ACH-000260	SKNAS_AUTONOMIC_GANGLIA	Peripheral nervous system	chr5	1221816	1225232	SLC6A19	5_1225121_C_T	15	13			28		CCLE_WGS	0.535714		1.15385
570	ACH-000264	CALU6_LUNG	Lung	chr5	1221816	1225232	SLC6A19	5_1223940_A_G	28	15			43		CCLE_WGS	0.651163		1.86667
571	ACH-000264	CALU6_LUNG	Lung	chr5	1221816	1225232	SLC6A19	5_1224174_T_C	12	24			36		CCLE_WGS	0.333333		0.5
572	ACH-000264	CALU6_LUNG	Lung	chr5	1221816	1225232	SLC6A19	5_1223730_G_A	50	14			64		CCLE_WGS	0.78125		3.57143
573	ACH-000264	CALU6_LUNG	Lung	chr5	1221816	1225232	SLC6A19	5_1223772_T_C	32	31			63		CCLE_WGS	0.507937		1.03226
574	ACH-000264	CALU6_LUNG	Lung	chr5	1221816	1225232	SLC6A19	5_1223835_T_C	20	14			34		CCLE_WGS	0.588235		1.42857
575	ACH-000264	CALU6_LUNG	Lung	chr5	1213578	1213688	SLC6A19	5_1213668_G_A	8	16			24		CCLE_WGS	0.333333		0.5
576	ACH-000264	CALU6_LUNG	Lung	chr5	1221816	1225232	SLC6A19	5_1224083_C_A	12	20			32		CCLE_WGS	0.375		0.6
577	ACH-000264	CALU6_LUNG	Lung	chr5	1221816	1225232	SLC6A19	5_1224285_G_A	11	29			40		CCLE_WGS	0.275		0.37931
578	ACH-000264	CALU6_LUNG	Lung	chr5	1221816	1225232	SLC6A19	5_1224405_A_G	8	25			33		CCLE_WGS	0.242424		0.32
579	ACH-000264	CALU6_LUNG	Lung	chr5	1221816	1225232	SLC6A19	5_1225121_C_T	20	16			36		CCLE_WGS	0.555556		1.25
580	ACH-000264	CALU6_LUNG	Lung	chr5	1221816	1225232	SLC6A19	5_1223062_G_T	11	22			33		CCLE_WGS	0.333333		0.5
581	ACH-000270	HPAC_PANCREAS	Pancreas	chr5	1216673	1217060	SLC6A19	5_1216775_A_G	50	63			113		CCLE_WGS	0.442478		0.793651
582	ACH-000270	HPAC_PANCREAS	Pancreas	chr5	1221816	1225232	SLC6A19	5_1224001_T_C	34	54			88		CCLE_WGS	0.386364		0.62963
583	ACH-000270	HPAC_PANCREAS	Pancreas	chr5	1221816	1225232	SLC6A19	5_1224051_C_T	48	54			102		CCLE_WGS	0.470588		0.888889
584	ACH-000270	HPAC_PANCREAS	Pancreas	chr5	1208861	1209001	SLC6A19	5_1208964_T_C	22	34			56		CCLE_WGS	0.392857		0.647059
585	ACH-000270	HPAC_PANCREAS	Pancreas	chr5	1221816	1225232	SLC6A19	5_1222480_C_T	55	103			158		CCLE_WGS	0.348101		0.533981
586	ACH-000270	HPAC_PANCREAS	Pancreas	chr5	1216673	1217060	SLC6A19	5_1216900_G_A	46	54			100		CCLE_WGS	0.46		0.851852
587	ACH-000270	HPAC_PANCREAS	Pancreas	chr5	1221816	1225232	SLC6A19	5_1222667_G_A	63	72			135		CCLE_WGS	0.466667		0.875
588	ACH-000270	HPAC_PANCREAS	Pancreas	chr5	1221816	1225232	SLC6A19	5_1223874_A_G	38	17			55		CCLE_WGS	0.690909		2.23529
589	ACH-000270	HPAC_PANCREAS	Pancreas	chr5	1221816	1225232	SLC6A19	5_1223786_T_C	76	20			96		CCLE_WGS	0.791667		3.8
590	ACH-000270	HPAC_PANCREAS	Pancreas	chr5	1221816	1225232	SLC6A19	5_1223772_T_C	75	23			98		CCLE_WGS	0.765306		3.26087
591	ACH-000270	HPAC_PANCREAS	Pancreas	chr5	1221816	1225232	SLC6A19	5_1224405_A_G	44	64			108		CCLE_WGS	0.407407		0.6875
592	ACH-000270	HPAC_PANCREAS	Pancreas	chr5	1221816	1225232	SLC6A19	5_1224490_G_T	41	58			99		CCLE_WGS	0.414141		0.706897
593	ACH-000271	SUDHL10_HAEMATOPOIETIC_AND_LYMPHOID_TISSUE	Lymphocyte	chr5	1216673	1217060	SLC6A19	5_1216900_G_A	53	58			111		CCLE_WES	0.477477		0.913793
594	ACH-000274	HS852T_SKIN	Skin	chr5	1216673	1217060	SLC6A19	5_1216900_G_A	195	55			250		CCLE_WES	0.78		3.54545
595	ACH-000276	HCC38_BREAST	Breast	chr5	1216673	1217060	SLC6A19	5_1216900_G_A	20	31			51		CCLE_WGS	0.392157		0.645161
596	ACH-000276	HCC38_BREAST	Breast	chr5	1221816	1225232	SLC6A19	5_1224001_T_C	36	11			47		CCLE_WGS	0.765957		3.27273
597	ACH-000276	HCC38_BREAST	Breast	chr5	1221816	1225232	SLC6A19	5_1223835_T_C	31	8			39		CCLE_WGS	0.794872		3.875
598	ACH-000276	HCC38_BREAST	Breast	chr5	1221816	1225232	SLC6A19	5_1222499_T_C	13	35			48		CCLE_WGS	0.270833		0.371429
599	ACH-000276	HCC38_BREAST	Breast	chr5	1213578	1213688	SLC6A19	5_1213668_G_A	14	25			39		CCLE_WGS	0.358974		0.56
600	ACH-000276	HCC38_BREAST	Breast	chr5	1221816	1225232	SLC6A19	5_1223940_A_G	41	10			51		CCLE_WGS	0.803922		4.1
601	ACH-000276	HCC38_BREAST	Breast	chr5	1221816	1225232	SLC6A19	5_1224003_C_T	36	11			47		CCLE_WGS	0.765957		3.27273
602	ACH-000276	HCC38_BREAST	Breast	chr5	1221816	1225232	SLC6A19	5_1225121_C_T	23	8			31		CCLE_WGS	0.741935		2.875
603	ACH-000277	HCC1419_BREAST	Breast	chr5	1221816	1225232	SLC6A19	5_1224795_G_C	39	28			67		CCLE_WGS	0.58209		1.39286
604	ACH-000277	HCC1419_BREAST	Breast	chr5	1221816	1225232	SLC6A19	5_1223940_A_G	38	20			58		CCLE_WGS	0.655172		1.9
605	ACH-000277	HCC1419_BREAST	Breast	chr5	1221816	1225232	SLC6A19	5_1223786_T_C	36	21			57		CCLE_WGS	0.631579		1.71429
606	ACH-000277	HCC1419_BREAST	Breast	chr5	1221816	1225232	SLC6A19	5_1222667_G_A	16	41			57		CCLE_WGS	0.280702		0.390244
607	ACH-000277	HCC1419_BREAST	Breast	chr5	1221816	1225232	SLC6A19	5_1224405_A_G	16	35			51		CCLE_WGS	0.313725		0.457143
608	ACH-000277	HCC1419_BREAST	Breast	chr5	1221816	1225232	SLC6A19	5_1225106_C_T	32	14			46		CCLE_WGS	0.695652		2.28571
609	ACH-000277	HCC1419_BREAST	Breast	chr5	1221816	1225232	SLC6A19	5_1222480_C_T	15	40			55		CCLE_WGS	0.272727		0.375
610	ACH-000277	HCC1419_BREAST	Breast	chr5	1216673	1217060	SLC6A19	5_1216900_G_A	15	22			37		CCLE_WGS	0.405405		0.681818
611	ACH-000277	HCC1419_BREAST	Breast	chr5	1208861	1209001	SLC6A19	5_1208964_T_C	10	14			24		CCLE_WGS	0.416667		0.714286
612	ACH-000277	HCC1419_BREAST	Breast	chr5	1221816	1225232	SLC6A19	5_1225121_C_T	32	17			49		CCLE_WGS	0.653061		1.88235
613	ACH-000277	HCC1419_BREAST	Breast	chr5	1221816	1225232	SLC6A19	5_1223772_T_C	39	21			60		CCLE_WGS	0.65		1.85714
614	ACH-000277	HCC1419_BREAST	Breast	chr5	1221816	1225232	SLC6A19	5_1223730_G_A	60	19			79		CCLE_WGS	0.759494		3.15789
615	ACH-000278	COV362_OVARY	Ovary	chr5	1221816	1225232	SLC6A19	5_1224795_G_C	22	17			39		CCLE_WGS	0.564103		1.29412
616	ACH-000278	COV362_OVARY	Ovary	chr5	1221816	1225232	SLC6A19	5_1224051_C_T	19	26			45		CCLE_WGS	0.422222		0.730769
617	ACH-000278	COV362_OVARY	Ovary	chr5	1221816	1225232	SLC6A19	5_1224490_G_T	22	23			45		CCLE_WGS	0.488889		0.956522
618	ACH-000278	COV362_OVARY	Ovary	chr5	1221816	1225232	SLC6A19	5_1223845_A_G	20	22			42		CCLE_WGS	0.47619		0.909091
619	ACH-000278	COV362_OVARY	Ovary	chr5	1221816	1225232	SLC6A19	5_1222499_T_C	30	20			50		CCLE_WGS	0.6		1.5
620	ACH-000278	COV362_OVARY	Ovary	chr5	1216673	1217060	SLC6A19	5_1216900_G_A	24	18			42		CCLE_WGS	0.571429		1.33333
621	ACH-000278	COV362_OVARY	Ovary	chr5	1216673	1217060	SLC6A19	5_1216775_A_G	13	17			30		CCLE_WGS	0.433333		0.764706
622	ACH-000281	KP2_PANCREAS	Pancreas	chr5	1216673	1217060	SLC6A19	5_1216900_G_A	50	37			87		CCLE_WES	0.574713		1.35135
623	ACH-000281	KP2_PANCREAS	Pancreas	chr5	1219018	1219222	SLC6A19	5_1219161_C_T	21	23			44		CCLE_WES	0.477273		0.913043
624	ACH-000281	KP2_PANCREAS	Pancreas	chr5	1213578	1213688	SLC6A19	5_1213668_G_A	15	27			42		CCLE_WES	0.357143		0.555556
625	ACH-000289	SNU466_CENTRAL_NERVOUS_SYSTEM	Central nervous system	chr5	1208861	1209001	SLC6A19	5_1208964_T_C	24	23			47		CCLE_WES	0.510638		1.04348
626	ACH-000289	SNU466_CENTRAL_NERVOUS_SYSTEM	Central nervous system	chr5	1213578	1213688	SLC6A19	5_1213668_G_A	16	16			32		CCLE_WES	0.5		1
627	ACH-000290	NCIH209_LUNG	Lung	chr5	1221816	1225232	SLC6A19	5_1223940_A_G	22	37			59		CCLE_WGS	0.372881		0.594595
628	ACH-000290	NCIH209_LUNG	Lung	chr5	1221816	1225232	SLC6A19	5_1224001_T_C	14	19			33		CCLE_WGS	0.424242		0.736842
629	ACH-000290	NCIH209_LUNG	Lung	chr5	1221816	1225232	SLC6A19	5_1224003_C_T	15	20			35		CCLE_WGS	0.428571		0.75
630	ACH-000290	NCIH209_LUNG	Lung	chr5	1221816	1225232	SLC6A19	5_1224795_G_C	21	48			69		CCLE_WGS	0.304348		0.4375
631	ACH-000290	NCIH209_LUNG	Lung	chr5	1221816	1225232	SLC6A19	5_1224490_G_T	28	46			74		CCLE_WGS	0.378378		0.608696
632	ACH-000290	NCIH209_LUNG	Lung	chr5	1221816	1225232	SLC6A19	5_1223835_T_C	26	39			65		CCLE_WGS	0.4		0.666667
633	ACH-000290	NCIH209_LUNG	Lung	chr5	1221816	1225232	SLC6A19	5_1225121_C_T	19	36			55		CCLE_WGS	0.345455		0.527778
634	ACH-000290	NCIH209_LUNG	Lung	chr5	1221816	1225232	SLC6A19	5_1224051_C_T	19	29			48		CCLE_WGS	0.395833		0.655172
635	ACH-000290	NCIH209_LUNG	Lung	chr5	1216673	1217060	SLC6A19	5_1216775_A_G	20	50			70		CCLE_WGS	0.285714		0.4
636	ACH-000290	NCIH209_LUNG	Lung	chr5	1221816	1225232	SLC6A19	5_1223730_G_A	20	51			71		CCLE_WGS	0.28169		0.392157
637	ACH-000291	OV90_OVARY	Ovary	chr5	1221816	1225232	SLC6A19	5_1222499_T_C	14	9			23		CCLE_WGS	0.608696		1.55556
638	ACH-000291	OV90_OVARY	Ovary	chr5	1216673	1217060	SLC6A19	5_1216900_G_A	43	35			78		CCLE_WES	0.551282		1.22857
639	ACH-000291	OV90_OVARY	Ovary	chr5	1216673	1217060	SLC6A19	5_1216900_G_A	15	8			23		CCLE_WGS	0.652174		1.875
640	ACH-000291	OV90_OVARY	Ovary	chr5	1221816	1225232	SLC6A19	5_1223700_C_T	11	9			20		CCLE_WGS	0.55		1.22222
641	ACH-000292	NCIH841_LUNG	Lung	chr5	1221816	1225232	SLC6A19	5_1223940_A_G	23	10			33		CCLE_WGS	0.69697		2.3
642	ACH-000292	NCIH841_LUNG	Lung	chr5	1221816	1225232	SLC6A19	5_1223845_A_G	15	30			45		CCLE_WGS	0.333333		0.5
643	ACH-000292	NCIH841_LUNG	Lung	chr5	1221816	1225232	SLC6A19	5_1223835_T_C	33	16			49		CCLE_WGS	0.673469		2.0625
644	ACH-000292	NCIH841_LUNG	Lung	chr5	1221816	1225232	SLC6A19	5_1223730_G_A	30	18			48		CCLE_WGS	0.625		1.66667
645	ACH-000292	NCIH841_LUNG	Lung	chr5	1221816	1225232	SLC6A19	5_1222499_T_C	24	40			64		CCLE_WGS	0.375		0.6
646	ACH-000292	NCIH841_LUNG	Lung	chr5	1221816	1225232	SLC6A19	5_1222282_A_G	38	10			48		CCLE_WGS	0.791667		3.8
647	ACH-000292	NCIH841_LUNG	Lung	chr5	1216673	1217060	SLC6A19	5_1216900_G_A	17	39			56		CCLE_WGS	0.303571		0.435897
648	ACH-000292	NCIH841_LUNG	Lung	chr5	1208861	1209001	SLC6A19	5_1208964_T_C	9	20			29		CCLE_WGS	0.310345		0.45
649	ACH-000292	NCIH841_LUNG	Lung	chr5	1221816	1225232	SLC6A19	5_1224003_C_T	20	9			29		CCLE_WGS	0.689655		2.22222
650	ACH-000292	NCIH841_LUNG	Lung	chr5	1221816	1225232	SLC6A19	5_1225121_C_T	25	14			39		CCLE_WGS	0.641026		1.78571
651	ACH-000293	KLE_ENDOMETRIUM	Uterus	chr5	1221816	1225232	SLC6A19	5_1224083_C_A	36	18			54		CCLE_WGS	0.666667		2
652	ACH-000293	KLE_ENDOMETRIUM	Uterus	chr5	1221816	1225232	SLC6A19	5_1224285_G_A	34	17			51		CCLE_WGS	0.666667		2
653	ACH-000293	KLE_ENDOMETRIUM	Uterus	chr5	1221816	1225232	SLC6A19	5_1224174_T_C	36	18			54		CCLE_WGS	0.666667		2
654	ACH-000293	KLE_ENDOMETRIUM	Uterus	chr5	1221816	1225232	SLC6A19	5_1224405_A_G	32	21			53		CCLE_WGS	0.603774		1.52381
655	ACH-000293	KLE_ENDOMETRIUM	Uterus	chr5	1221816	1225232	SLC6A19	5_1223730_G_A	24	36			60		CCLE_WGS	0.4		0.666667
656	ACH-000293	KLE_ENDOMETRIUM	Uterus	chr5	1221816	1225232	SLC6A19	5_1225121_C_T	13	31			44		CCLE_WGS	0.295455		0.419355
657	ACH-000293	KLE_ENDOMETRIUM	Uterus	chr5	1221816	1225232	SLC6A19	5_1223772_T_C	41	16			57		CCLE_WGS	0.719298		2.5625
658	ACH-000293	KLE_ENDOMETRIUM	Uterus	chr5	1221816	1225232	SLC6A19	5_1223835_T_C	18	28			46		CCLE_WGS	0.391304		0.642857
659	ACH-000293	KLE_ENDOMETRIUM	Uterus	chr5	1221816	1225232	SLC6A19	5_1223940_A_G	17	30			47		CCLE_WGS	0.361702		0.566667
660	ACH-000293	KLE_ENDOMETRIUM	Uterus	chr5	1221816	1225232	SLC6A19	5_1223062_G_T	34	17			51		CCLE_WGS	0.666667		2
661	ACH-000293	KLE_ENDOMETRIUM	Uterus	chr5	1208861	1209001	SLC6A19	5_1208964_T_C	24	10			34		CCLE_WGS	0.705882		2.4
662	ACH-000294	NB4_HAEMATOPOIETIC_AND_LYMPHOID_TISSUE	Blood	chr5	1208861	1209001	SLC6A19	5_1208964_T_C	32	31			63		CCLE_WES	0.507937		1.03226
663	ACH-000297	NCIH889_LUNG	Lung	chr5	1221816	1225232	SLC6A19	5_1224285_G_A	39	24			63		CCLE_WGS	0.619048		1.625
664	ACH-000297	NCIH889_LUNG	Lung	chr5	1221816	1225232	SLC6A19	5_1224174_T_C	51	36			87		CCLE_WGS	0.586207		1.41667
665	ACH-000297	NCIH889_LUNG	Lung	chr5	1221816	1225232	SLC6A19	5_1224083_C_A	47	17			64		CCLE_WGS	0.734375		2.76471
666	ACH-000297	NCIH889_LUNG	Lung	chr5	1221816	1225232	SLC6A19	5_1223940_A_G	25	46			71		CCLE_WGS	0.352113		0.543478
667	ACH-000297	NCIH889_LUNG	Lung	chr5	1221816	1225232	SLC6A19	5_1223062_G_T	41	29			70		CCLE_WGS	0.585714		1.41379
668	ACH-000297	NCIH889_LUNG	Lung	chr5	1221816	1225232	SLC6A19	5_1223835_T_C	25	40			65		CCLE_WGS	0.384615		0.625
669	ACH-000297	NCIH889_LUNG	Lung	chr5	1221816	1225232	SLC6A19	5_1223772_T_C	79	25			104		CCLE_WGS	0.759615		3.16
670	ACH-000297	NCIH889_LUNG	Lung	chr5	1221816	1225232	SLC6A19	5_1225224_C_T	55	8			63		CCLE_WGS	0.873016		6.875
671	ACH-000297	NCIH889_LUNG	Lung	chr5	1221816	1225232	SLC6A19	5_1223730_G_A	43	51			94		CCLE_WGS	0.457447		0.843137
672	ACH-000297	NCIH889_LUNG	Lung	chr5	1221816	1225232	SLC6A19	5_1225121_C_T	23	42			65		CCLE_WGS	0.353846		0.547619
673	ACH-000297	NCIH889_LUNG	Lung	chr5	1221816	1225232	SLC6A19	5_1224003_C_T	25	13			38		CCLE_WGS	0.657895		1.92308
674	ACH-000297	NCIH889_LUNG	Lung	chr5	1221816	1225232	SLC6A19	5_1224405_A_G	59	34			93		CCLE_WGS	0.634409		1.73529
675	ACH-000298	NCIH2029_LUNG	Lung	chr5	1221816	1225232	SLC6A19	5_1224490_G_T	23	21			44		CCLE_WGS	0.522727		1.09524
676	ACH-000298	NCIH2029_LUNG	Lung	chr5	1221816	1225232	SLC6A19	5_1224001_T_C	17	14			31		CCLE_WGS	0.548387		1.21429
677	ACH-000298	NCIH2029_LUNG	Lung	chr5	1221816	1225232	SLC6A19	5_1224405_A_G	24	23			47		CCLE_WGS	0.510638		1.04348
678	ACH-000298	NCIH2029_LUNG	Lung	chr5	1216673	1217060	SLC6A19	5_1216775_A_G	18	21			39		CCLE_WGS	0.461538		0.857143
679	ACH-000298	NCIH2029_LUNG	Lung	chr5	1221816	1225232	SLC6A19	5_1224795_G_C	17	34			51		CCLE_WGS	0.333333		0.5
680	ACH-000298	NCIH2029_LUNG	Lung	chr5	1221816	1225232	SLC6A19	5_1223062_G_T	24	19			43		CCLE_WGS	0.55814		1.26316
681	ACH-000298	NCIH2029_LUNG	Lung	chr5	1221816	1225232	SLC6A19	5_1223772_T_C	42	13			55		CCLE_WGS	0.763636		3.23077
682	ACH-000298	NCIH2029_LUNG	Lung	chr5	1221816	1225232	SLC6A19	5_1224285_G_A	16	11			27		CCLE_WGS	0.592593		1.45455
683	ACH-000298	NCIH2029_LUNG	Lung	chr5	1221816	1225232	SLC6A19	5_1224051_C_T	25	17			42		CCLE_WGS	0.595238		1.47059
684	ACH-000298	NCIH2029_LUNG	Lung	chr5	1221816	1225232	SLC6A19	5_1224083_C_A	26	15			41		CCLE_WGS	0.634146		1.73333
685	ACH-000298	NCIH2029_LUNG	Lung	chr5	1221816	1225232	SLC6A19	5_1224174_T_C	27	23			50		CCLE_WGS	0.54		1.17391
686	ACH-000301	LAMA84_HAEMATOPOIETIC_AND_LYMPHOID_TISSUE	Blood	chr5	1221816	1225232	SLC6A19	5_1224083_C_A	31	25	122	65	56	187	CCLE_WGS	0.553571	0.652406	1.24	1.87692	1.51365	1.51399	0
687	ACH-000301	LAMA84_HAEMATOPOIETIC_AND_LYMPHOID_TISSUE	Blood	chr5	1221816	1225232	SLC6A19	5_1224003_C_T	40	14	96	26	54	122	CCLE_WGS	0.740741	0.786885	2.85714	3.69231	1.29231	1.30375	0
688	ACH-000301	LAMA84_HAEMATOPOIETIC_AND_LYMPHOID_TISSUE	Blood	chr5	1221816	1225232	SLC6A19	5_1223940_A_G	29	28	140	172	57	312	CCLE_WGS	0.508772	0.448718	1.03571	0.813953	0.785886	0.786883	0
689	ACH-000301	LAMA84_HAEMATOPOIETIC_AND_LYMPHOID_TISSUE	Blood	chr5	1221816	1225232	SLC6A19	5_1223835_T_C	34	30	145	254	64	399	CCLE_WGS	0.53125	0.363409	1.13333	0.570866	0.503705	0.505424	0
690	ACH-000301	LAMA84_HAEMATOPOIETIC_AND_LYMPHOID_TISSUE	Blood	chr5	1221816	1225232	SLC6A19	5_1223772_T_C	39	24	219	111	63	330	CCLE_WGS	0.619048	0.663636	1.625	1.97297	1.21414	1.22104	0
691	ACH-000301	LAMA84_HAEMATOPOIETIC_AND_LYMPHOID_TISSUE	Blood	chr5	1208861	1209001	SLC6A19	5_1208964_T_C	19	15	51	96	34	147	CCLE_WGS	0.558824	0.346939	1.26667	0.53125	0.419408	0.424206	0
692	ACH-000301	LAMA84_HAEMATOPOIETIC_AND_LYMPHOID_TISSUE	Blood	chr5	1221816	1225232	SLC6A19	5_1223062_G_T	19	27	193	123	46	316	CCLE_WGS	0.413043	0.610759	0.703704	1.56911	2.22978	2.20959	0
693	ACH-000301	LAMA84_HAEMATOPOIETIC_AND_LYMPHOID_TISSUE	Blood	chr5	1221816	1225232	SLC6A19	5_1224174_T_C	30	31	128	96	61	224	CCLE_WGS	0.491803	0.571429	0.967742	1.33333	1.37778	1.37527	0
694	ACH-000301	LAMA84_HAEMATOPOIETIC_AND_LYMPHOID_TISSUE	Blood	chr5	1221816	1225232	SLC6A19	5_1223700_C_T	44	13	175	125	57	300	CCLE_WGS	0.77193	0.583333	3.38462	1.4	0.413636	0.424236	0
695	ACH-000301	LAMA84_HAEMATOPOIETIC_AND_LYMPHOID_TISSUE	Blood	chr5	1221816	1225232	SLC6A19	5_1225121_C_T	23	27	13	9	50	22	CCLE_WGS	0.46	0.590909	0.851852	1.44444	1.69565	1.66293	0
696	ACH-000301	LAMA84_HAEMATOPOIETIC_AND_LYMPHOID_TISSUE	Blood	chr5	1221816	1225232	SLC6A19	5_1224285_G_A	23	22	91	70	45	161	CCLE_WGS	0.511111	0.565217	1.04545	1.3	1.24348	1.24264	0
697	ACH-000301	LAMA84_HAEMATOPOIETIC_AND_LYMPHOID_TISSUE	Blood	chr5	1221816	1225232	SLC6A19	5_1224405_A_G	42	31	110	58	73	168	CCLE_WGS	0.575342	0.654762	1.35484	1.89655	1.39984	1.4	0
698	ACH-000302	SNU1077_ENDOMETRIUM	Uterus	chr5	1216673	1217060	SLC6A19	5_1216775_A_G	11	72			83		CCLE_WES	0.13253		0.152778
699	ACH-000302	SNU1077_ENDOMETRIUM	Uterus	chr5	1208861	1209001	SLC6A19	5_1208964_T_C	71	11			82		CCLE_WES	0.865854		6.45455
700	ACH-000302	SNU1077_ENDOMETRIUM	Uterus	chr5	1216673	1217060	SLC6A19	5_1216900_G_A	12	118			130		CCLE_WES	0.0923077		0.101695
701	ACH-000308	EFO21_OVARY	Ovary	chr5	1221816	1225232	SLC6A19	5_1224174_T_C	21	70			91		CCLE_WGS	0.230769		0.3
702	ACH-000308	EFO21_OVARY	Ovary	chr5	1221816	1225232	SLC6A19	5_1224405_A_G	17	88			105		CCLE_WGS	0.161905		0.193182
703	ACH-000308	EFO21_OVARY	Ovary	chr5	1221816	1225232	SLC6A19	5_1224285_G_A	12	66			78		CCLE_WGS	0.153846		0.181818
704	ACH-000308	EFO21_OVARY	Ovary	chr5	1221816	1225232	SLC6A19	5_1224083_C_A	23	86			109		CCLE_WGS	0.211009		0.267442
705	ACH-000308	EFO21_OVARY	Ovary	chr5	1221816	1225232	SLC6A19	5_1224001_T_C	15	60			75		CCLE_WGS	0.2		0.25
706	ACH-000308	EFO21_OVARY	Ovary	chr5	1221816	1225232	SLC6A19	5_1223845_A_G	78	20			98		CCLE_WGS	0.795918		3.9
707	ACH-000308	EFO21_OVARY	Ovary	chr5	1221816	1225232	SLC6A19	5_1223786_T_C	134	9			143		CCLE_WGS	0.937063		14.8889
708	ACH-000308	EFO21_OVARY	Ovary	chr5	1221816	1225232	SLC6A19	5_1223772_T_C	98	51			149		CCLE_WGS	0.657718		1.92157
709	ACH-000308	EFO21_OVARY	Ovary	chr5	1208861	1209001	SLC6A19	5_1208964_T_C	33	11			44		CCLE_WGS	0.75		3
710	ACH-000308	EFO21_OVARY	Ovary	chr5	1221816	1225232	SLC6A19	5_1222499_T_C	74	20			94		CCLE_WGS	0.787234		3.7
711	ACH-000308	EFO21_OVARY	Ovary	chr5	1216673	1217060	SLC6A19	5_1216900_G_A	91	8			99		CCLE_WGS	0.919192		11.375
712	ACH-000308	EFO21_OVARY	Ovary	chr5	1221816	1225232	SLC6A19	5_1223062_G_T	19	78			97		CCLE_WGS	0.195876		0.24359
713	ACH-000309	SKLU1_LUNG	Lung	chr5	1216673	1217060	SLC6A19	5_1216900_G_A	27	26			53		CCLE_WGS	0.509434		1.03846
714	ACH-000309	SKLU1_LUNG	Lung	chr5	1221816	1225232	SLC6A19	5_1222499_T_C	23	28			51		CCLE_WGS	0.45098		0.821429
715	ACH-000309	SKLU1_LUNG	Lung	chr5	1221816	1225232	SLC6A19	5_1223062_G_T	36	18			54		CCLE_WGS	0.666667		2
716	ACH-000309	SKLU1_LUNG	Lung	chr5	1221816	1225232	SLC6A19	5_1223772_T_C	61	33			94		CCLE_WGS	0.648936		1.84848
717	ACH-000309	SKLU1_LUNG	Lung	chr5	1208861	1209001	SLC6A19	5_1208964_T_C	14	18			32		CCLE_WGS	0.4375		0.777778
718	ACH-000309	SKLU1_LUNG	Lung	chr5	1221816	1225232	SLC6A19	5_1224083_C_A	30	23			53		CCLE_WGS	0.566038		1.30435
719	ACH-000309	SKLU1_LUNG	Lung	chr5	1221816	1225232	SLC6A19	5_1224174_T_C	47	21			68		CCLE_WGS	0.691176		2.2381
720	ACH-000309	SKLU1_LUNG	Lung	chr5	1221816	1225232	SLC6A19	5_1224405_A_G	37	27			64		CCLE_WGS	0.578125		1.37037
721	ACH-000309	SKLU1_LUNG	Lung	chr5	1221816	1225232	SLC6A19	5_1224285_G_A	36	22			58		CCLE_WGS	0.62069		1.63636
722	ACH-000309	SKLU1_LUNG	Lung	chr5	1221816	1225232	SLC6A19	5_1223845_A_G	34	44			78		CCLE_WGS	0.435897		0.772727
723	ACH-000311	NCIH2122_LUNG	Lung	chr5	1216673	1217060	SLC6A19	5_1216792_G_T	29	29			58		CCLE_WGS	0.5		1
724	ACH-000311	NCIH2122_LUNG	Lung	chr5	1221816	1225232	SLC6A19	5_1223062_G_T	35	35			70		CCLE_WGS	0.5		1
725	ACH-000311	NCIH2122_LUNG	Lung	chr5	1221816	1225232	SLC6A19	5_1223730_G_A	65	27			92		CCLE_WGS	0.706522		2.40741
726	ACH-000311	NCIH2122_LUNG	Lung	chr5	1221816	1225232	SLC6A19	5_1223772_T_C	69	33			102		CCLE_WGS	0.676471		2.09091
727	ACH-000311	NCIH2122_LUNG	Lung	chr5	1221816	1225232	SLC6A19	5_1223835_T_C	26	40			66		CCLE_WGS	0.393939		0.65
728	ACH-000311	NCIH2122_LUNG	Lung	chr5	1221816	1225232	SLC6A19	5_1224003_C_T	33	12			45		CCLE_WGS	0.733333		2.75
729	ACH-000311	NCIH2122_LUNG	Lung	chr5	1221816	1225232	SLC6A19	5_1224083_C_A	34	29			63		CCLE_WGS	0.539683		1.17241
730	ACH-000311	NCIH2122_LUNG	Lung	chr5	1221816	1225232	SLC6A19	5_1224285_G_A	38	34			72		CCLE_WGS	0.527778		1.11765
731	ACH-000311	NCIH2122_LUNG	Lung	chr5	1221816	1225232	SLC6A19	5_1224405_A_G	34	34			68		CCLE_WGS	0.5		1
732	ACH-000311	NCIH2122_LUNG	Lung	chr5	1221816	1225232	SLC6A19	5_1225121_C_T	25	35			60		CCLE_WGS	0.416667		0.714286
733	ACH-000311	NCIH2122_LUNG	Lung	chr5	1221816	1225232	SLC6A19	5_1223940_A_G	32	28			60		CCLE_WGS	0.533333		1.14286
734	ACH-000311	NCIH2122_LUNG	Lung	chr5	1221816	1225232	SLC6A19	5_1224174_T_C	37	40			77		CCLE_WGS	0.480519		0.925
735	ACH-000311	NCIH2122_LUNG	Lung	chr5	1208861	1209001	SLC6A19	5_1208964_T_C	18	16			34		CCLE_WGS	0.529412		1.125
736	ACH-000311	NCIH2122_LUNG	Lung	chr5	1213578	1213688	SLC6A19	5_1213668_G_A	24	24			48		CCLE_WGS	0.5		1
737	ACH-000313	KMRC3_KIDNEY	Kidney	chr5	1213578	1213688	SLC6A19	5_1213668_G_A	49	25			74		CCLE_WES	0.662162		1.96
738	ACH-000316	SNU886_LIVER	Liver	chr5	1216673	1217060	SLC6A19	5_1216787_C_T	30	31			61		CCLE_WES	0.491803		0.967742
739	ACH-000316	SNU886_LIVER	Liver	chr5	1216673	1217060	SLC6A19	5_1216775_A_G	37	30			67		CCLE_WES	0.552239		1.23333
740	ACH-000317	TUHR14TKB_KIDNEY	Kidney	chr5	1216673	1217060	SLC6A19	5_1216900_G_A	52	50			102		CCLE_WES	0.509804		1.04
741	ACH-000321	MOLM6_HAEMATOPOIETIC_AND_LYMPHOID_TISSUE	Blood	chr5	1208861	1209001	SLC6A19	5_1208964_T_C	33	20			53		CCLE_WES	0.622642		1.65
742	ACH-000321	MOLM6_HAEMATOPOIETIC_AND_LYMPHOID_TISSUE	Blood	chr5	1213578	1213688	SLC6A19	5_1213668_G_A	18	24			42		CCLE_WES	0.428571		0.75
743	ACH-000321	MOLM6_HAEMATOPOIETIC_AND_LYMPHOID_TISSUE	Blood	chr5	1216673	1217060	SLC6A19	5_1216775_A_G	36	30			66		CCLE_WES	0.545455		1.2
744	ACH-000322	HT144_SKIN	Skin	chr5	1221816	1225232	SLC6A19	5_1225121_C_T	32	18			50		CCLE_WGS	0.64		1.77778
745	ACH-000322	HT144_SKIN	Skin	chr5	1221816	1225232	SLC6A19	5_1224003_C_T	35	16			51		CCLE_WGS	0.686275		2.1875
746	ACH-000322	HT144_SKIN	Skin	chr5	1221816	1225232	SLC6A19	5_1223940_A_G	27	19			46		CCLE_WGS	0.586957		1.42105
747	ACH-000322	HT144_SKIN	Skin	chr5	1221816	1225232	SLC6A19	5_1224001_T_C	32	16			48		CCLE_WGS	0.666667		2
748	ACH-000322	HT144_SKIN	Skin	chr5	1221816	1225232	SLC6A19	5_1223730_G_A	34	21			55		CCLE_WGS	0.618182		1.61905
749	ACH-000322	HT144_SKIN	Skin	chr5	1216673	1217060	SLC6A19	5_1216900_G_A	18	18			36		CCLE_WGS	0.5		1
750	ACH-000322	HT144_SKIN	Skin	chr5	1213578	1213688	SLC6A19	5_1213668_G_A	19	11			30		CCLE_WGS	0.633333		1.72727
751	ACH-000322	HT144_SKIN	Skin	chr5	1221816	1225232	SLC6A19	5_1223845_A_G	21	30			51		CCLE_WGS	0.411765		0.7
752	ACH-000322	HT144_SKIN	Skin	chr5	1221816	1225232	SLC6A19	5_1223835_T_C	31	21			52		CCLE_WGS	0.596154		1.47619
753	ACH-000324	JHOC5_OVARY	Ovary	chr5	1208861	1209001	SLC6A19	5_1208964_T_C	24	35			59		CCLE_WES	0.40678		0.685714
754	ACH-000325	SNU620_STOMACH	Gastric	chr5	1213578	1213688	SLC6A19	5_1213668_G_A	21	9			30		CCLE_WES	0.7		2.33333
755	ACH-000330	EFM19_BREAST	Breast	chr5	1216673	1217060	SLC6A19	5_1216783_A_C	18	11			29		CCLE_WGS	0.62069		1.63636
756	ACH-000330	EFM19_BREAST	Breast	chr5	1221816	1225232	SLC6A19	5_1222667_G_A	19	11			30		CCLE_WGS	0.633333		1.72727
757	ACH-000330	EFM19_BREAST	Breast	chr5	1221816	1225232	SLC6A19	5_1224405_A_G	21	14			35		CCLE_WGS	0.6		1.5
758	ACH-000330	EFM19_BREAST	Breast	chr5	1221816	1225232	SLC6A19	5_1224795_G_C	10	21			31		CCLE_WGS	0.322581		0.47619
759	ACH-000330	EFM19_BREAST	Breast	chr5	1221816	1225232	SLC6A19	5_1222499_T_C	14	25			39		CCLE_WGS	0.358974		0.56
760	ACH-000330	EFM19_BREAST	Breast	chr5	1216673	1217060	SLC6A19	5_1216767_C_A	18	9			27		CCLE_WGS	0.666667		2
761	ACH-000330	EFM19_BREAST	Breast	chr5	1221816	1225232	SLC6A19	5_1222480_C_T	26	14			40		CCLE_WGS	0.65		1.85714
762	ACH-000334	DB_HAEMATOPOIETIC_AND_LYMPHOID_TISSUE	Lymphocyte	chr5	1221816	1225232	SLC6A19	5_1224001_T_C	14	15			29		CCLE_WGS	0.482759		0.933333
763	ACH-000334	DB_HAEMATOPOIETIC_AND_LYMPHOID_TISSUE	Lymphocyte	chr5	1221816	1225232	SLC6A19	5_1224003_C_T	16	16			32		CCLE_WGS	0.5		1
764	ACH-000334	DB_HAEMATOPOIETIC_AND_LYMPHOID_TISSUE	Lymphocyte	chr5	1221816	1225232	SLC6A19	5_1222499_T_C	34	17			51		CCLE_WGS	0.666667		2
765	ACH-000334	DB_HAEMATOPOIETIC_AND_LYMPHOID_TISSUE	Lymphocyte	chr5	1221816	1225232	SLC6A19	5_1225121_C_T	17	24			41		CCLE_WGS	0.414634		0.708333
766	ACH-000334	DB_HAEMATOPOIETIC_AND_LYMPHOID_TISSUE	Lymphocyte	chr5	1221816	1225232	SLC6A19	5_1223940_A_G	23	17			40		CCLE_WGS	0.575		1.35294
767	ACH-000334	DB_HAEMATOPOIETIC_AND_LYMPHOID_TISSUE	Lymphocyte	chr5	1221816	1225232	SLC6A19	5_1223845_A_G	18	23			41		CCLE_WGS	0.439024		0.782609
768	ACH-000334	DB_HAEMATOPOIETIC_AND_LYMPHOID_TISSUE	Lymphocyte	chr5	1221816	1225232	SLC6A19	5_1223835_T_C	27	15			42		CCLE_WGS	0.642857		1.8
769	ACH-000334	DB_HAEMATOPOIETIC_AND_LYMPHOID_TISSUE	Lymphocyte	chr5	1221816	1225232	SLC6A19	5_1223730_G_A	17	23			40		CCLE_WGS	0.425		0.73913
770	ACH-000334	DB_HAEMATOPOIETIC_AND_LYMPHOID_TISSUE	Lymphocyte	chr5	1216673	1217060	SLC6A19	5_1216900_G_A	26	24			50		CCLE_WGS	0.52		1.08333
771	ACH-000335	MSTO211H_PLEURA	Lung	chr5	1221816	1225232	SLC6A19	5_1222499_T_C	12	39			51		CCLE_WGS	0.235294		0.307692
772	ACH-000335	MSTO211H_PLEURA	Lung	chr5	1221816	1225232	SLC6A19	5_1223772_T_C	48	17			65		CCLE_WGS	0.738462		2.82353
773	ACH-000335	MSTO211H_PLEURA	Lung	chr5	1221816	1225232	SLC6A19	5_1224285_G_A	34	8			42		CCLE_WGS	0.809524		4.25
774	ACH-000335	MSTO211H_PLEURA	Lung	chr5	1221816	1225232	SLC6A19	5_1224174_T_C	41	15			56		CCLE_WGS	0.732143		2.73333
775	ACH-000335	MSTO211H_PLEURA	Lung	chr5	1221816	1225232	SLC6A19	5_1223062_G_T	35	13			48		CCLE_WGS	0.729167		2.69231
776	ACH-000335	MSTO211H_PLEURA	Lung	chr5	1221816	1225232	SLC6A19	5_1223845_A_G	14	47			61		CCLE_WGS	0.229508		0.297872
777	ACH-000335	MSTO211H_PLEURA	Lung	chr5	1221816	1225232	SLC6A19	5_1224405_A_G	43	18			61		CCLE_WGS	0.704918		2.38889
778	ACH-000335	MSTO211H_PLEURA	Lung	chr5	1216673	1217060	SLC6A19	5_1216900_G_A	13	44			57		CCLE_WGS	0.22807		0.295455
779	ACH-000342	CL14_LARGE_INTESTINE	Colorectal	chr5	1208861	1209001	SLC6A19	5_1208964_T_C	15	32			47		CCLE_WES	0.319149		0.46875
780	ACH-000342	CL14_LARGE_INTESTINE	Colorectal	chr5	1216673	1217060	SLC6A19	5_1216900_G_A	45	94			139		CCLE_WES	0.323741		0.478723
781	ACH-000345	KPNRTBM1_AUTONOMIC_GANGLIA	Peripheral nervous system	chr5	1208861	1209001	SLC6A19	5_1208964_T_C	26	40			66		CCLE_WES	0.393939		0.65
782	ACH-000347	QGP1_PANCREAS	Pancreas	chr5	1221816	1225232	SLC6A19	5_1222798_G_A	20	35			55		CCLE_WGS	0.363636		0.571429
783	ACH-000347	QGP1_PANCREAS	Pancreas	chr5	1216673	1217060	SLC6A19	5_1217045_C_T	36	24			60		CCLE_WGS	0.6		1.5
784	ACH-000347	QGP1_PANCREAS	Pancreas	chr5	1221816	1225232	SLC6A19	5_1222843_T_C	27	17			44		CCLE_WGS	0.613636		1.58824
785	ACH-000349	HCC1500_BREAST	Breast	chr5	1221816	1225232	SLC6A19	5_1223772_T_C	13	34			47		CCLE_WGS	0.276596		0.382353
786	ACH-000351	MKN1_STOMACH	Gastric	chr5	1221816	1225232	SLC6A19	5_1225121_C_T	40	16			56		CCLE_WGS	0.714286		2.5
787	ACH-000351	MKN1_STOMACH	Gastric	chr5	1221816	1225232	SLC6A19	5_1224490_G_T	50	24			74		CCLE_WGS	0.675676		2.08333
788	ACH-000351	MKN1_STOMACH	Gastric	chr5	1221816	1225232	SLC6A19	5_1223940_A_G	31	15			46		CCLE_WGS	0.673913		2.06667
789	ACH-000351	MKN1_STOMACH	Gastric	chr5	1221816	1225232	SLC6A19	5_1223835_T_C	36	19			55		CCLE_WGS	0.654545		1.89474
790	ACH-000351	MKN1_STOMACH	Gastric	chr5	1221816	1225232	SLC6A19	5_1223730_G_A	41	17			58		CCLE_WGS	0.706897		2.41176
791	ACH-000351	MKN1_STOMACH	Gastric	chr5	1216673	1217060	SLC6A19	5_1216900_G_A	44	18			62		CCLE_WGS	0.709677		2.44444
792	ACH-000351	MKN1_STOMACH	Gastric	chr5	1216673	1217060	SLC6A19	5_1216775_A_G	44	21			65		CCLE_WGS	0.676923		2.09524
793	ACH-000351	MKN1_STOMACH	Gastric	chr5	1208861	1209001	SLC6A19	5_1208964_T_C	22	14			36		CCLE_WGS	0.611111		1.57143
794	ACH-000351	MKN1_STOMACH	Gastric	chr5	1221816	1225232	SLC6A19	5_1224795_G_C	35	26			61		CCLE_WGS	0.57377		1.34615
795	ACH-000351	MKN1_STOMACH	Gastric	chr5	1201710	1201967	SLC6A19	5_1201751_C_T	42	24			66		CCLE_WGS	0.636364		1.75
796	ACH-000352	HCC1428_BREAST	Breast	chr5	1221816	1225232	SLC6A19	5_1225121_C_T	16	11			27		CCLE_WGS	0.592593		1.45455
797	ACH-000352	HCC1428_BREAST	Breast	chr5	1221816	1225232	SLC6A19	5_1224405_A_G	8	12			20		CCLE_WGS	0.4		0.666667
798	ACH-000352	HCC1428_BREAST	Breast	chr5	1221816	1225232	SLC6A19	5_1223835_T_C	10	22			32		CCLE_WGS	0.3125		0.454545
799	ACH-000352	HCC1428_BREAST	Breast	chr5	1221816	1225232	SLC6A19	5_1223772_T_C	23	9			32		CCLE_WGS	0.71875		2.55556
800	ACH-000352	HCC1428_BREAST	Breast	chr5	1221816	1225232	SLC6A19	5_1223730_G_A	17	13			30		CCLE_WGS	0.566667		1.30769
801	ACH-000354	CAPAN1_PANCREAS	Pancreas	chr5	1221816	1225232	SLC6A19	5_1224174_T_C	15	54			69		CCLE_WGS	0.217391		0.277778
802	ACH-000354	CAPAN1_PANCREAS	Pancreas	chr5	1221816	1225232	SLC6A19	5_1224083_C_A	13	33			46		CCLE_WGS	0.282609		0.393939
803	ACH-000354	CAPAN1_PANCREAS	Pancreas	chr5	1221816	1225232	SLC6A19	5_1224001_T_C	12	44			56		CCLE_WGS	0.214286		0.272727
804	ACH-000354	CAPAN1_PANCREAS	Pancreas	chr5	1221816	1225232	SLC6A19	5_1223845_A_G	49	23			72		CCLE_WGS	0.680556		2.13043
805	ACH-000354	CAPAN1_PANCREAS	Pancreas	chr5	1221816	1225232	SLC6A19	5_1223772_T_C	65	54			119		CCLE_WGS	0.546218		1.2037
806	ACH-000354	CAPAN1_PANCREAS	Pancreas	chr5	1221816	1225232	SLC6A19	5_1223062_G_T	22	46			68		CCLE_WGS	0.323529		0.478261
807	ACH-000354	CAPAN1_PANCREAS	Pancreas	chr5	1221816	1225232	SLC6A19	5_1222499_T_C	41	18			59		CCLE_WGS	0.694915		2.27778
808	ACH-000354	CAPAN1_PANCREAS	Pancreas	chr5	1216673	1217060	SLC6A19	5_1216900_G_A	44	18			62		CCLE_WGS	0.709677		2.44444
809	ACH-000354	CAPAN1_PANCREAS	Pancreas	chr5	1208861	1209001	SLC6A19	5_1208964_T_C	15	37			52		CCLE_WGS	0.288462		0.405405
810	ACH-000354	CAPAN1_PANCREAS	Pancreas	chr5	1221816	1225232	SLC6A19	5_1224405_A_G	19	55			74		CCLE_WGS	0.256757		0.345455
811	ACH-000354	CAPAN1_PANCREAS	Pancreas	chr5	1221816	1225232	SLC6A19	5_1224285_G_A	14	47			61		CCLE_WGS	0.229508		0.297872
812	ACH-000356	MKN45_STOMACH	Gastric	chr5	1221816	1225232	SLC6A19	5_1223772_T_C	83	96			179		CCLE_WGS	0.463687		0.864583
813	ACH-000358	NCIH69_LUNG	Lung	chr5	1221816	1225232	SLC6A19	5_1223835_T_C	29	31			60		CCLE_WGS	0.483333		0.935484
814	ACH-000358	NCIH69_LUNG	Lung	chr5	1221816	1225232	SLC6A19	5_1223730_G_A	20	16			36		CCLE_WGS	0.555556		1.25
815	ACH-000358	NCIH69_LUNG	Lung	chr5	1221816	1225232	SLC6A19	5_1222499_T_C	26	37			63		CCLE_WGS	0.412698		0.702703
816	ACH-000358	NCIH69_LUNG	Lung	chr5	1216673	1217060	SLC6A19	5_1216900_G_A	29	33			62		CCLE_WGS	0.467742		0.878788
817	ACH-000358	NCIH69_LUNG	Lung	chr5	1221816	1225232	SLC6A19	5_1223845_A_G	34	29			63		CCLE_WGS	0.539683		1.17241
818	ACH-000358	NCIH69_LUNG	Lung	chr5	1221816	1225232	SLC6A19	5_1225121_C_T	21	27			48		CCLE_WGS	0.4375		0.777778
819	ACH-000358	NCIH69_LUNG	Lung	chr5	1221816	1225232	SLC6A19	5_1224003_C_T	24	8			32		CCLE_WGS	0.75		3
820	ACH-000358	NCIH69_LUNG	Lung	chr5	1221816	1225232	SLC6A19	5_1224001_T_C	24	8			32		CCLE_WGS	0.75		3
821	ACH-000358	NCIH69_LUNG	Lung	chr5	1221816	1225232	SLC6A19	5_1223940_A_G	29	17			46		CCLE_WGS	0.630435		1.70588
822	ACH-000360	NCIH508_LARGE_INTESTINE	Colorectal	chr5	1221816	1225232	SLC6A19	5_1224003_C_T	29	41			70		CCLE_WGS	0.414286		0.707317
823	ACH-000360	NCIH508_LARGE_INTESTINE	Colorectal	chr5	1221816	1225232	SLC6A19	5_1224001_T_C	25	41			66		CCLE_WGS	0.378788		0.609756
824	ACH-000360	NCIH508_LARGE_INTESTINE	Colorectal	chr5	1221816	1225232	SLC6A19	5_1223940_A_G	38	41			79		CCLE_WGS	0.481013		0.926829
825	ACH-000360	NCIH508_LARGE_INTESTINE	Colorectal	chr5	1221816	1225232	SLC6A19	5_1223845_A_G	53	24			77		CCLE_WGS	0.688312		2.20833
826	ACH-000360	NCIH508_LARGE_INTESTINE	Colorectal	chr5	1221816	1225232	SLC6A19	5_1223835_T_C	24	52			76		CCLE_WGS	0.315789		0.461538
827	ACH-000360	NCIH508_LARGE_INTESTINE	Colorectal	chr5	1221816	1225232	SLC6A19	5_1223730_G_A	29	45			74		CCLE_WGS	0.391892		0.644444
828	ACH-000360	NCIH508_LARGE_INTESTINE	Colorectal	chr5	1221816	1225232	SLC6A19	5_1222499_T_C	44	40			84		CCLE_WGS	0.52381		1.1
829	ACH-000360	NCIH508_LARGE_INTESTINE	Colorectal	chr5	1216673	1217060	SLC6A19	5_1216900_G_A	39	39			78		CCLE_WGS	0.5		1
830	ACH-000360	NCIH508_LARGE_INTESTINE	Colorectal	chr5	1208861	1209001	SLC6A19	5_1208964_T_C	16	35			51		CCLE_WGS	0.313725		0.457143
831	ACH-000360	NCIH508_LARGE_INTESTINE	Colorectal	chr5	1221816	1225232	SLC6A19	5_1225121_C_T	30	70			100		CCLE_WGS	0.3		0.428571
832	ACH-000361	SKHEP1_LIVER	Liver	chr5	1221816	1225232	SLC6A19	5_1223730_G_A	21	40			61		CCLE_WGS	0.344262		0.525
833	ACH-000361	SKHEP1_LIVER	Liver	chr5	1201710	1201967	SLC6A19	5_1201810_C_G	20	32			52		CCLE_WGS	0.384615		0.625
834	ACH-000361	SKHEP1_LIVER	Liver	chr5	1221816	1225232	SLC6A19	5_1222756_G_C	16	38			54		CCLE_WGS	0.296296		0.421053
835	ACH-000361	SKHEP1_LIVER	Liver	chr5	1221816	1225232	SLC6A19	5_1225121_C_T	16	32			48		CCLE_WGS	0.333333		0.5
836	ACH-000361	SKHEP1_LIVER	Liver	chr5	1221816	1225232	SLC6A19	5_1224795_G_C	14	38			52		CCLE_WGS	0.269231		0.368421
837	ACH-000361	SKHEP1_LIVER	Liver	chr5	1221816	1225232	SLC6A19	5_1223835_T_C	13	31			44		CCLE_WGS	0.295455		0.419355
838	ACH-000361	SKHEP1_LIVER	Liver	chr5	1221816	1225232	SLC6A19	5_1223940_A_G	21	23			44		CCLE_WGS	0.477273		0.913043
839	ACH-000361	SKHEP1_LIVER	Liver	chr5	1221816	1225232	SLC6A19	5_1224003_C_T	10	11			21		CCLE_WGS	0.47619		0.909091
840	ACH-000361	SKHEP1_LIVER	Liver	chr5	1221816	1225232	SLC6A19	5_1224490_G_T	22	41			63		CCLE_WGS	0.349206		0.536585
841	ACH-000361	SKHEP1_LIVER	Liver	chr5	1221816	1225232	SLC6A19	5_1224001_T_C	11	12			23		CCLE_WGS	0.478261		0.916667
842	ACH-000361	SKHEP1_LIVER	Liver	chr5	1221816	1225232	SLC6A19	5_1224051_C_T	11	16			27		CCLE_WGS	0.407407		0.6875
843	ACH-000361	SKHEP1_LIVER	Liver	chr5	1216673	1217060	SLC6A19	5_1216775_A_G	22	45			67		CCLE_WGS	0.328358		0.488889
844	ACH-000362	MOLM13_HAEMATOPOIETIC_AND_LYMPHOID_TISSUE	Blood	chr5	1208861	1209001	SLC6A19	5_1208964_T_C	19	14			33		CCLE_WES	0.575758		1.35714
845	ACH-000364	U2OS_BONE	Bone	chr5	1221816	1225232	SLC6A19	5_1223700_C_T	26	17			43		CCLE_WGS	0.604651		1.52941
846	ACH-000364	U2OS_BONE	Bone	chr5	1208861	1209001	SLC6A19	5_1208964_T_C	9	12			21		CCLE_WGS	0.428571		0.75
847	ACH-000364	U2OS_BONE	Bone	chr5	1221816	1225232	SLC6A19	5_1223730_G_A	11	29			40		CCLE_WGS	0.275		0.37931
848	ACH-000365	SUDHL4_HAEMATOPOIETIC_AND_LYMPHOID_TISSUE	Lymphocyte	chr5	1208861	1209001	SLC6A19	5_1208964_T_C	16	23			39		CCLE_WES	0.410256		0.695652
849	ACH-000367	NCIH226_LUNG	Lung	chr5	1221816	1225232	SLC6A19	5_1224405_A_G	18	10			28		CCLE_WGS	0.642857		1.8
850	ACH-000367	NCIH226_LUNG	Lung	chr5	1221816	1225232	SLC6A19	5_1224285_G_A	25	22			47		CCLE_WGS	0.531915		1.13636
851	ACH-000367	NCIH226_LUNG	Lung	chr5	1221816	1225232	SLC6A19	5_1224174_T_C	11	10			21		CCLE_WGS	0.52381		1.1
852	ACH-000367	NCIH226_LUNG	Lung	chr5	1221816	1225232	SLC6A19	5_1224083_C_A	15	15			30		CCLE_WGS	0.5		1
853	ACH-000367	NCIH226_LUNG	Lung	chr5	1216673	1217060	SLC6A19	5_1216900_G_A	10	15			25		CCLE_WGS	0.4		0.666667
854	ACH-000367	NCIH226_LUNG	Lung	chr5	1221816	1225232	SLC6A19	5_1222499_T_C	23	22			45		CCLE_WGS	0.511111		1.04545
855	ACH-000367	NCIH226_LUNG	Lung	chr5	1221816	1225232	SLC6A19	5_1223062_G_T	15	15			30		CCLE_WGS	0.5		1
856	ACH-000367	NCIH226_LUNG	Lung	chr5	1221816	1225232	SLC6A19	5_1223772_T_C	40	21			61		CCLE_WGS	0.655738		1.90476
857	ACH-000367	NCIH226_LUNG	Lung	chr5	1221816	1225232	SLC6A19	5_1223845_A_G	19	22			41		CCLE_WGS	0.463415		0.863636
858	ACH-000368	SNU1105_CENTRAL_NERVOUS_SYSTEM	Central nervous system	chr5	1216673	1217060	SLC6A19	5_1216900_G_A	42	42			84		CCLE_WES	0.5		1
859	ACH-000369	MOLM16_HAEMATOPOIETIC_AND_LYMPHOID_TISSUE	Blood	chr5	1216673	1217060	SLC6A19	5_1216900_G_A	66	86	9	10	152	19	CCLE_WES	0.434211	0.473684	0.767442	0.9	1.17273	1.17687	0
860	ACH-000370	SNU626_CENTRAL_NERVOUS_SYSTEM	Central nervous system	chr5	1216673	1217060	SLC6A19	5_1216775_A_G	43	30			73		CCLE_WES	0.589041		1.43333
861	ACH-000375	G402_SOFT_TISSUE	Soft tissue	chr5	1221816	1225232	SLC6A19	5_1222499_T_C	11	22			33		CCLE_WGS	0.333333		0.5
862	ACH-000375	G402_SOFT_TISSUE	Soft tissue	chr5	1221816	1225232	SLC6A19	5_1223730_G_A	27	13			40		CCLE_WGS	0.675		2.07692
863	ACH-000375	G402_SOFT_TISSUE	Soft tissue	chr5	1216673	1217060	SLC6A19	5_1216775_A_G	18	17			35		CCLE_WGS	0.514286		1.05882
864	ACH-000375	G402_SOFT_TISSUE	Soft tissue	chr5	1208861	1209001	SLC6A19	5_1208964_T_C	16	13			29		CCLE_WGS	0.551724		1.23077
865	ACH-000375	G402_SOFT_TISSUE	Soft tissue	chr5	1201710	1201967	SLC6A19	5_1201758_C_T	16	19			35		CCLE_WGS	0.457143		0.842105
866	ACH-000375	G402_SOFT_TISSUE	Soft tissue	chr5	1221816	1225232	SLC6A19	5_1223835_T_C	27	18			45		CCLE_WGS	0.6		1.5
867	ACH-000375	G402_SOFT_TISSUE	Soft tissue	chr5	1216673	1217060	SLC6A19	5_1216900_G_A	15	10			25		CCLE_WGS	0.6		1.5
868	ACH-000375	G402_SOFT_TISSUE	Soft tissue	chr5	1221816	1225232	SLC6A19	5_1223940_A_G	13	12			25		CCLE_WGS	0.52		1.08333
869	ACH-000375	G402_SOFT_TISSUE	Soft tissue	chr5	1221816	1225232	SLC6A19	5_1225121_C_T	21	15			36		CCLE_WGS	0.583333		1.4
870	ACH-000375	G402_SOFT_TISSUE	Soft tissue	chr5	1221816	1225232	SLC6A19	5_1224003_C_T	16	11			27		CCLE_WGS	0.592593		1.45455
871	ACH-000375	G402_SOFT_TISSUE	Soft tissue	chr5	1221816	1225232	SLC6A19	5_1224001_T_C	13	11			24		CCLE_WGS	0.541667		1.18182
872	ACH-000375	G402_SOFT_TISSUE	Soft tissue	chr5	1221816	1225232	SLC6A19	5_1223845_A_G	17	26			43		CCLE_WGS	0.395349		0.653846
873	ACH-000376	SF295_CENTRAL_NERVOUS_SYSTEM	Central nervous system	chr5	1221816	1225232	SLC6A19	5_1223730_G_A	11	23			34		CCLE_WGS	0.323529		0.478261
874	ACH-000376	SF295_CENTRAL_NERVOUS_SYSTEM	Central nervous system	chr5	1221816	1225232	SLC6A19	5_1223700_C_T	28	17			45		CCLE_WGS	0.622222		1.64706
875	ACH-000377	SNU478_BILIARY_TRACT	Bile duct	chr5	1216673	1217060	SLC6A19	5_1216767_C_T	108	21			129		CCLE_WES	0.837209		5.14286
876	ACH-000381	T84_LARGE_INTESTINE	Colorectal	chr5	1221816	1225232	SLC6A19	5_1223772_T_C	25	40			65		CCLE_WGS	0.384615		0.625
877	ACH-000382	CORL24_LUNG	Lung	chr5	1221816	1225232	SLC6A19	5_1223700_C_T	17	14			31		CCLE_WGS	0.548387		1.21429
878	ACH-000382	CORL24_LUNG	Lung	chr5	1208861	1209001	SLC6A19	5_1208964_T_C	16	13			29		CCLE_WGS	0.551724		1.23077
879	ACH-000387	TF1_HAEMATOPOIETIC_AND_LYMPHOID_TISSUE	Blood	chr5	1219018	1219222	SLC6A19	5_1219151_T_C	12	23	0	29	35	29	CCLE_WES	0.342857	0	0.521739	0	0	0.0318644	1
880	ACH-000387	TF1_HAEMATOPOIETIC_AND_LYMPHOID_TISSUE	Blood	chr5	1208861	1209001	SLC6A19	5_1208964_T_C	12	30	0	9	42	9	CCLE_WES	0.285714	0	0.4	0	0	0.128421	1
881	ACH-000387	TF1_HAEMATOPOIETIC_AND_LYMPHOID_TISSUE	Blood	chr5	1216673	1217060	SLC6A19	5_1216775_A_G	21	41	0	19	62	19	CCLE_WES	0.33871	0	0.512195	0	0	0.0494931	1
882	ACH-000388	NUDHL1_HAEMATOPOIETIC_AND_LYMPHOID_TISSUE	Lymphocyte	chr5	1216673	1217060	SLC6A19	5_1216775_A_G	29	72			101		CCLE_WES	0.287129		0.402778
883	ACH-000389	H4_CENTRAL_NERVOUS_SYSTEM	Central nervous system	chr5	1208861	1209001	SLC6A19	5_1208964_T_C	19	14			33		CCLE_WGS	0.575758		1.35714
884	ACH-000392	CALU3_LUNG	Lung	chr5	1213578	1213688	SLC6A19	5_1213668_G_A	28	19			47		CCLE_WES	0.595745		1.47368
885	ACH-000392	CALU3_LUNG	Lung	chr5	1208861	1209001	SLC6A19	5_1208964_T_C	29	16			45		CCLE_WES	0.644444		1.8125
886	ACH-000394	NCIH2081_LUNG	Lung	chr5	1221816	1225232	SLC6A19	5_1224285_G_A	74	49			123		CCLE_WGS	0.601626		1.5102
887	ACH-000394	NCIH2081_LUNG	Lung	chr5	1221816	1225232	SLC6A19	5_1224795_G_C	71	27			98		CCLE_WGS	0.72449		2.62963
888	ACH-000394	NCIH2081_LUNG	Lung	chr5	1221816	1225232	SLC6A19	5_1224174_T_C	57	26			83		CCLE_WGS	0.686747		2.19231
889	ACH-000394	NCIH2081_LUNG	Lung	chr5	1216673	1217060	SLC6A19	5_1216900_G_A	24	65			89		CCLE_WGS	0.269663		0.369231
890	ACH-000394	NCIH2081_LUNG	Lung	chr5	1221816	1225232	SLC6A19	5_1223874_A_G	26	15			41		CCLE_WGS	0.634146		1.73333
891	ACH-000394	NCIH2081_LUNG	Lung	chr5	1221816	1225232	SLC6A19	5_1224083_C_A	75	27			102		CCLE_WGS	0.735294		2.77778
892	ACH-000394	NCIH2081_LUNG	Lung	chr5	1213578	1213688	SLC6A19	5_1213668_G_A	22	41			63		CCLE_WGS	0.349206		0.536585
893	ACH-000394	NCIH2081_LUNG	Lung	chr5	1216673	1217060	SLC6A19	5_1216788_G_A	28	69			97		CCLE_WGS	0.28866		0.405797
894	ACH-000394	NCIH2081_LUNG	Lung	chr5	1221816	1225232	SLC6A19	5_1222480_C_T	37	60			97		CCLE_WGS	0.381443		0.616667
895	ACH-000394	NCIH2081_LUNG	Lung	chr5	1208861	1209001	SLC6A19	5_1208964_T_C	25	28			53		CCLE_WGS	0.471698		0.892857
896	ACH-000394	NCIH2081_LUNG	Lung	chr5	1221816	1225232	SLC6A19	5_1223062_G_T	55	25			80		CCLE_WGS	0.6875		2.2
897	ACH-000394	NCIH2081_LUNG	Lung	chr5	1221816	1225232	SLC6A19	5_1223700_C_T	95	17			112		CCLE_WGS	0.848214		5.58824
898	ACH-000394	NCIH2081_LUNG	Lung	chr5	1221816	1225232	SLC6A19	5_1223772_T_C	62	48			110		CCLE_WGS	0.563636		1.29167
899	ACH-000394	NCIH2081_LUNG	Lung	chr5	1221816	1225232	SLC6A19	5_1223786_T_C	67	18			85		CCLE_WGS	0.788235		3.72222
900	ACH-000394	NCIH2081_LUNG	Lung	chr5	1221816	1225232	SLC6A19	5_1222667_G_A	33	52			85		CCLE_WGS	0.388235		0.634615
901	ACH-000395	NCIH520_LUNG	Lung	chr5	1221816	1225232	SLC6A19	5_1223730_G_A	27	25			52		CCLE_WGS	0.519231		1.08
902	ACH-000395	NCIH520_LUNG	Lung	chr5	1221816	1225232	SLC6A19	5_1224405_A_G	29	19			48		CCLE_WGS	0.604167		1.52632
903	ACH-000395	NCIH520_LUNG	Lung	chr5	1221816	1225232	SLC6A19	5_1223772_T_C	46	11			57		CCLE_WGS	0.807018		4.18182
904	ACH-000395	NCIH520_LUNG	Lung	chr5	1221816	1225232	SLC6A19	5_1223835_T_C	16	32			48		CCLE_WGS	0.333333		0.5
905	ACH-000395	NCIH520_LUNG	Lung	chr5	1221816	1225232	SLC6A19	5_1223940_A_G	21	26			47		CCLE_WGS	0.446809		0.807692
906	ACH-000395	NCIH520_LUNG	Lung	chr5	1221816	1225232	SLC6A19	5_1224003_C_T	15	30			45		CCLE_WGS	0.333333		0.5
907	ACH-000395	NCIH520_LUNG	Lung	chr5	1221816	1225232	SLC6A19	5_1224083_C_A	28	12			40		CCLE_WGS	0.7		2.33333
908	ACH-000395	NCIH520_LUNG	Lung	chr5	1221816	1225232	SLC6A19	5_1224174_T_C	21	21			42		CCLE_WGS	0.5		1
909	ACH-000395	NCIH520_LUNG	Lung	chr5	1221816	1225232	SLC6A19	5_1224285_G_A	24	14			38		CCLE_WGS	0.631579		1.71429
910	ACH-000395	NCIH520_LUNG	Lung	chr5	1221816	1225232	SLC6A19	5_1225121_C_T	22	23			45		CCLE_WGS	0.488889		0.956522
911	ACH-000395	NCIH520_LUNG	Lung	chr5	1221816	1225232	SLC6A19	5_1223062_G_T	18	8			26		CCLE_WGS	0.692308		2.25
912	ACH-000402	BL70_HAEMATOPOIETIC_AND_LYMPHOID_TISSUE	Lymphocyte	chr5	1216673	1217060	SLC6A19	5_1216900_G_A	49	46			95		CCLE_WES	0.515789		1.06522
913	ACH-000402	BL70_HAEMATOPOIETIC_AND_LYMPHOID_TISSUE	Lymphocyte	chr5	1208861	1209001	SLC6A19	5_1208964_T_C	14	21			35		CCLE_WES	0.4		0.666667
914	ACH-000403	NCIH747_LARGE_INTESTINE	Colorectal	chr5	1213578	1213688	SLC6A19	5_1213668_G_A	22	18			40		CCLE_WGS	0.55		1.22222
915	ACH-000403	NCIH747_LARGE_INTESTINE	Colorectal	chr5	1208861	1209001	SLC6A19	5_1208964_T_C	10	18			28		CCLE_WGS	0.357143		0.555556
916	ACH-000407	SNU685_ENDOMETRIUM	Uterus	chr5	1216673	1217060	SLC6A19	5_1216900_G_A	86	80			166		CCLE_WES	0.518072		1.075
917	ACH-000408	TE5_OESOPHAGUS	Esophagus	chr5	1208861	1209001	SLC6A19	5_1208964_T_C	25	13			38		CCLE_WGS	0.657895		1.92308
918	ACH-000408	TE5_OESOPHAGUS	Esophagus	chr5	1221816	1225232	SLC6A19	5_1223859_G_A	36	42			78		CCLE_WGS	0.461538		0.857143
919	ACH-000409	OVSAHO_OVARY	Ovary	chr5	1221816	1225232	SLC6A19	5_1224003_C_T	34	21			55		CCLE_WGS	0.618182		1.61905
920	ACH-000409	OVSAHO_OVARY	Ovary	chr5	1221816	1225232	SLC6A19	5_1223940_A_G	38	27			65		CCLE_WGS	0.584615		1.40741
921	ACH-000409	OVSAHO_OVARY	Ovary	chr5	1221816	1225232	SLC6A19	5_1224083_C_A	33	32			65		CCLE_WGS	0.507692		1.03125
922	ACH-000409	OVSAHO_OVARY	Ovary	chr5	1213578	1213688	SLC6A19	5_1213668_G_A	19	33			52		CCLE_WES	0.365385		0.575758
923	ACH-000409	OVSAHO_OVARY	Ovary	chr5	1221816	1225232	SLC6A19	5_1224285_G_A	39	42			81		CCLE_WGS	0.481481		0.928571
924	ACH-000409	OVSAHO_OVARY	Ovary	chr5	1221816	1225232	SLC6A19	5_1224405_A_G	55	42			97		CCLE_WGS	0.56701		1.30952
925	ACH-000409	OVSAHO_OVARY	Ovary	chr5	1221816	1225232	SLC6A19	5_1225121_C_T	29	31			60		CCLE_WGS	0.483333		0.935484
926	ACH-000409	OVSAHO_OVARY	Ovary	chr5	1208861	1209001	SLC6A19	5_1208964_T_C	29	19			48		CCLE_WES	0.604167		1.52632
927	ACH-000409	OVSAHO_OVARY	Ovary	chr5	1221816	1225232	SLC6A19	5_1224174_T_C	39	60			99		CCLE_WGS	0.393939		0.65
928	ACH-000409	OVSAHO_OVARY	Ovary	chr5	1221816	1225232	SLC6A19	5_1223772_T_C	66	53			119		CCLE_WGS	0.554622		1.24528
929	ACH-000409	OVSAHO_OVARY	Ovary	chr5	1213578	1213688	SLC6A19	5_1213668_G_A	27	20			47		CCLE_WGS	0.574468		1.35
930	ACH-000409	OVSAHO_OVARY	Ovary	chr5	1221816	1225232	SLC6A19	5_1223062_G_T	24	34			58		CCLE_WGS	0.413793		0.705882
931	ACH-000409	OVSAHO_OVARY	Ovary	chr5	1221816	1225232	SLC6A19	5_1223730_G_A	93	29			122		CCLE_WGS	0.762295		3.2069
932	ACH-000409	OVSAHO_OVARY	Ovary	chr5	1221816	1225232	SLC6A19	5_1223835_T_C	42	38			80		CCLE_WGS	0.525		1.10526
933	ACH-000409	OVSAHO_OVARY	Ovary	chr5	1208861	1209001	SLC6A19	5_1208964_T_C	24	16			40		CCLE_WGS	0.6		1.5
934	ACH-000411	769P_KIDNEY	Kidney	chr5	1221816	1225232	SLC6A19	5_1223062_G_T	16	12			28		CCLE_WGS	0.571429		1.33333
935	ACH-000411	769P_KIDNEY	Kidney	chr5	1221816	1225232	SLC6A19	5_1224405_A_G	23	23			46		CCLE_WGS	0.5		1
936	ACH-000411	769P_KIDNEY	Kidney	chr5	1221816	1225232	SLC6A19	5_1224285_G_A	18	24			42		CCLE_WGS	0.428571		0.75
937	ACH-000411	769P_KIDNEY	Kidney	chr5	1221816	1225232	SLC6A19	5_1224174_T_C	18	17			35		CCLE_WGS	0.514286		1.05882
938	ACH-000411	769P_KIDNEY	Kidney	chr5	1221816	1225232	SLC6A19	5_1224083_C_A	25	20			45		CCLE_WGS	0.555556		1.25
939	ACH-000411	769P_KIDNEY	Kidney	chr5	1221816	1225232	SLC6A19	5_1224051_C_T	29	21			50		CCLE_WGS	0.58		1.38095
940	ACH-000411	769P_KIDNEY	Kidney	chr5	1221816	1225232	SLC6A19	5_1224001_T_C	18	16			34		CCLE_WGS	0.529412		1.125
941	ACH-000411	769P_KIDNEY	Kidney	chr5	1221816	1225232	SLC6A19	5_1224490_G_T	26	19			45		CCLE_WGS	0.577778		1.36842
942	ACH-000411	769P_KIDNEY	Kidney	chr5	1221816	1225232	SLC6A19	5_1224795_G_C	22	19			41		CCLE_WGS	0.536585		1.15789
943	ACH-000411	769P_KIDNEY	Kidney	chr5	1216673	1217060	SLC6A19	5_1216775_A_G	22	22			44		CCLE_WGS	0.5		1
944	ACH-000411	769P_KIDNEY	Kidney	chr5	1208861	1209001	SLC6A19	5_1208964_T_C	10	10			20		CCLE_WGS	0.5		1
945	ACH-000412	SNU1197_LARGE_INTESTINE	Colorectal	chr5	1216673	1217060	SLC6A19	5_1216900_G_A	43	44			87		CCLE_WES	0.494253		0.977273
946	ACH-000412	SNU1197_LARGE_INTESTINE	Colorectal	chr5	1213578	1213688	SLC6A19	5_1213668_G_A	11	17			28		CCLE_WES	0.392857		0.647059
947	ACH-000412	SNU1197_LARGE_INTESTINE	Colorectal	chr5	1208861	1209001	SLC6A19	5_1208964_T_C	26	15			41		CCLE_WES	0.634146		1.73333
948	ACH-000414	NCIH1944_LUNG	Lung	chr5	1216673	1217060	SLC6A19	5_1216900_G_A	117	64			181		CCLE_WES	0.646409		1.82812
949	ACH-000416	NCIH838_LUNG	Lung	chr5	1221816	1225232	SLC6A19	5_1223772_T_C	33	49			82		CCLE_WGS	0.402439		0.673469
950	ACH-000418	SW1353_BONE	Bone	chr5	1216673	1217060	SLC6A19	5_1216900_G_A	34	30			64		CCLE_WES	0.53125		1.13333
951	ACH-000420	SNU449_LIVER	Liver	chr5	1221816	1225232	SLC6A19	5_1224490_G_T	23	22			45		CCLE_WGS	0.511111		1.04545
952	ACH-000420	SNU449_LIVER	Liver	chr5	1221816	1225232	SLC6A19	5_1225121_C_T	20	15			35		CCLE_WGS	0.571429		1.33333
953	ACH-000420	SNU449_LIVER	Liver	chr5	1221816	1225232	SLC6A19	5_1224051_C_T	13	12			25		CCLE_WGS	0.52		1.08333
954	ACH-000420	SNU449_LIVER	Liver	chr5	1221816	1225232	SLC6A19	5_1223940_A_G	12	13			25		CCLE_WGS	0.48		0.923077
955	ACH-000420	SNU449_LIVER	Liver	chr5	1221816	1225232	SLC6A19	5_1224795_G_C	22	15			37		CCLE_WGS	0.594595		1.46667
956	ACH-000420	SNU449_LIVER	Liver	chr5	1213578	1213688	SLC6A19	5_1213668_G_A	12	10			22		CCLE_WGS	0.545455		1.2
957	ACH-000420	SNU449_LIVER	Liver	chr5	1221816	1225232	SLC6A19	5_1223730_G_A	21	14			35		CCLE_WGS	0.6		1.5
958	ACH-000420	SNU449_LIVER	Liver	chr5	1221816	1225232	SLC6A19	5_1223835_T_C	16	8			24		CCLE_WGS	0.666667		2
959	ACH-000422	SNU475_LIVER	Liver	chr5	1221816	1225232	SLC6A19	5_1223772_T_C	39	48			87		CCLE_WGS	0.448276		0.8125
960	ACH-000422	SNU475_LIVER	Liver	chr5	1221816	1225232	SLC6A19	5_1224083_C_A	22	11			33		CCLE_WGS	0.666667		2
961	ACH-000422	SNU475_LIVER	Liver	chr5	1221816	1225232	SLC6A19	5_1223016_A_G	8	32			40		CCLE_WGS	0.2		0.25
962	ACH-000427	NCIN87_STOMACH	Gastric	chr5	1221816	1225232	SLC6A19	5_1222775_C_T	30	23			53		CCLE_WGS	0.566038		1.30435
963	ACH-000427	NCIN87_STOMACH	Gastric	chr5	1221816	1225232	SLC6A19	5_1222787_C_T	33	24			57		CCLE_WGS	0.578947		1.375
964	ACH-000427	NCIN87_STOMACH	Gastric	chr5	1221816	1225232	SLC6A19	5_1223500_G_C	24	21			45		CCLE_WGS	0.533333		1.14286
965	ACH-000427	NCIN87_STOMACH	Gastric	chr5	1221816	1225232	SLC6A19	5_1225121_C_T	16	22			38		CCLE_WGS	0.421053		0.727273
966	ACH-000427	NCIN87_STOMACH	Gastric	chr5	1221816	1225232	SLC6A19	5_1224003_C_T	24	15			39		CCLE_WGS	0.615385		1.6
967	ACH-000427	NCIN87_STOMACH	Gastric	chr5	1221816	1225232	SLC6A19	5_1223294_C_T	19	28			47		CCLE_WGS	0.404255		0.678571
968	ACH-000427	NCIN87_STOMACH	Gastric	chr5	1221816	1225232	SLC6A19	5_1222315_T_A	32	30			62		CCLE_WGS	0.516129		1.06667
969	ACH-000427	NCIN87_STOMACH	Gastric	chr5	1221816	1225232	SLC6A19	5_1222167_C_T	20	21			41		CCLE_WGS	0.487805		0.952381
970	ACH-000427	NCIN87_STOMACH	Gastric	chr5	1221816	1225232	SLC6A19	5_1222578_A_T	22	27			49		CCLE_WGS	0.44898		0.814815
971	ACH-000429	A704_KIDNEY	Kidney	chr5	1208861	1209001	SLC6A19	5_1208964_T_C	15	19			34		CCLE_WGS	0.441176		0.789474
972	ACH-000429	A704_KIDNEY	Kidney	chr5	1221816	1225232	SLC6A19	5_1222957_C_T	18	20			38		CCLE_WGS	0.473684		0.9
973	ACH-000429	A704_KIDNEY	Kidney	chr5	1221816	1225232	SLC6A19	5_1222798_G_A	17	18			35		CCLE_WGS	0.485714		0.944444
974	ACH-000429	A704_KIDNEY	Kidney	chr5	1216673	1217060	SLC6A19	5_1216900_G_A	21	13			34		CCLE_WGS	0.617647		1.61538
975	ACH-000430	TYKNU_OVARY	Ovary	chr5	1208861	1209001	SLC6A19	5_1208964_T_C	23	40			63		CCLE_WES	0.365079		0.575
976	ACH-000431	NCIH1694_LUNG	Lung	chr5	1221816	1225232	SLC6A19	5_1223730_G_A	50	61			111		CCLE_WGS	0.45045		0.819672
977	ACH-000431	NCIH1694_LUNG	Lung	chr5	1221816	1225232	SLC6A19	5_1224003_C_T	8	24			32		CCLE_WGS	0.25		0.333333
978	ACH-000431	NCIH1694_LUNG	Lung	chr5	1221816	1225232	SLC6A19	5_1224083_C_A	54	12			66		CCLE_WGS	0.818182		4.5
979	ACH-000431	NCIH1694_LUNG	Lung	chr5	1221816	1225232	SLC6A19	5_1223062_G_T	65	17			82		CCLE_WGS	0.792683		3.82353
980	ACH-000431	NCIH1694_LUNG	Lung	chr5	1221816	1225232	SLC6A19	5_1222756_G_C	29	73			102		CCLE_WGS	0.284314		0.39726
981	ACH-000431	NCIH1694_LUNG	Lung	chr5	1221816	1225232	SLC6A19	5_1224174_T_C	78	20			98		CCLE_WGS	0.795918		3.9
982	ACH-000431	NCIH1694_LUNG	Lung	chr5	1221816	1225232	SLC6A19	5_1223835_T_C	24	69			93		CCLE_WGS	0.258065		0.347826
983	ACH-000431	NCIH1694_LUNG	Lung	chr5	1221816	1225232	SLC6A19	5_1223772_T_C	81	28			109		CCLE_WGS	0.743119		2.89286
984	ACH-000431	NCIH1694_LUNG	Lung	chr5	1221816	1225232	SLC6A19	5_1223940_A_G	15	55			70		CCLE_WGS	0.214286		0.272727
985	ACH-000431	NCIH1694_LUNG	Lung	chr5	1221816	1225232	SLC6A19	5_1224405_A_G	65	19			84		CCLE_WGS	0.77381		3.42105
986	ACH-000431	NCIH1694_LUNG	Lung	chr5	1221816	1225232	SLC6A19	5_1224285_G_A	68	15			83		CCLE_WGS	0.819277		4.53333
987	ACH-000433	CAKI1_KIDNEY	Kidney	chr5	1221816	1225232	SLC6A19	5_1224405_A_G	35	32			67		CCLE_WGS	0.522388		1.09375
988	ACH-000433	CAKI1_KIDNEY	Kidney	chr5	1221816	1225232	SLC6A19	5_1224285_G_A	63	26			89		CCLE_WGS	0.707865		2.42308
989	ACH-000433	CAKI1_KIDNEY	Kidney	chr5	1221816	1225232	SLC6A19	5_1224174_T_C	42	19			61		CCLE_WGS	0.688525		2.21053
990	ACH-000433	CAKI1_KIDNEY	Kidney	chr5	1221816	1225232	SLC6A19	5_1224083_C_A	47	23			70		CCLE_WGS	0.671429		2.04348
991	ACH-000433	CAKI1_KIDNEY	Kidney	chr5	1221816	1225232	SLC6A19	5_1224003_C_T	24	22			46		CCLE_WGS	0.521739		1.09091
992	ACH-000433	CAKI1_KIDNEY	Kidney	chr5	1221816	1225232	SLC6A19	5_1223940_A_G	17	28			45		CCLE_WGS	0.377778		0.607143
993	ACH-000433	CAKI1_KIDNEY	Kidney	chr5	1221816	1225232	SLC6A19	5_1225121_C_T	25	44			69		CCLE_WGS	0.362319		0.568182
994	ACH-000433	CAKI1_KIDNEY	Kidney	chr5	1221816	1225232	SLC6A19	5_1223700_C_T	28	34			62		CCLE_WGS	0.451613		0.823529
995	ACH-000433	CAKI1_KIDNEY	Kidney	chr5	1221816	1225232	SLC6A19	5_1223772_T_C	39	14			53		CCLE_WGS	0.735849		2.78571
996	ACH-000433	CAKI1_KIDNEY	Kidney	chr5	1221816	1225232	SLC6A19	5_1223835_T_C	26	52			78		CCLE_WGS	0.333333		0.5
997	ACH-000433	CAKI1_KIDNEY	Kidney	chr5	1221816	1225232	SLC6A19	5_1223062_G_T	49	20			69		CCLE_WGS	0.710145		2.45
998	ACH-000435	EFE184_ENDOMETRIUM	Uterus	chr5	1208861	1209001	SLC6A19	5_1208964_T_C	24	8			32		CCLE_WES	0.75		3
999	ACH-000439	ME1_HAEMATOPOIETIC_AND_LYMPHOID_TISSUE	Blood	chr5	1208861	1209001	SLC6A19	5_1208964_T_C	28	28			56		CCLE_WES	0.5		1
1000	ACH-000439	ME1_HAEMATOPOIETIC_AND_LYMPHOID_TISSUE	Blood	chr5	1213578	1213688	SLC6A19	5_1213668_G_A	24	22			46		CCLE_WES	0.521739		1.09091
1001	ACH-000444	LU99_LUNG	Lung	chr5	1221816	1225232	SLC6A19	5_1225121_C_T	20	28			48		CCLE_WGS	0.416667		0.714286
1002	ACH-000444	LU99_LUNG	Lung	chr5	1221816	1225232	SLC6A19	5_1224003_C_T	26	30			56		CCLE_WGS	0.464286		0.866667
1003	ACH-000444	LU99_LUNG	Lung	chr5	1221816	1225232	SLC6A19	5_1223700_C_T	24	18			42		CCLE_WGS	0.571429		1.33333
1004	ACH-000444	LU99_LUNG	Lung	chr5	1216673	1217060	SLC6A19	5_1216775_A_G	24	36			60		CCLE_WGS	0.4		0.666667
1005	ACH-000444	LU99_LUNG	Lung	chr5	1221816	1225232	SLC6A19	5_1223835_T_C	17	38			55		CCLE_WGS	0.309091		0.447368
1006	ACH-000444	LU99_LUNG	Lung	chr5	1221816	1225232	SLC6A19	5_1224001_T_C	23	30			53		CCLE_WGS	0.433962		0.766667
1007	ACH-000444	LU99_LUNG	Lung	chr5	1221816	1225232	SLC6A19	5_1224051_C_T	19	32			51		CCLE_WGS	0.372549		0.59375
1008	ACH-000444	LU99_LUNG	Lung	chr5	1221816	1225232	SLC6A19	5_1224490_G_T	26	41			67		CCLE_WGS	0.38806		0.634146
1009	ACH-000444	LU99_LUNG	Lung	chr5	1221816	1225232	SLC6A19	5_1224795_G_C	20	27			47		CCLE_WGS	0.425532		0.740741
1010	ACH-000444	LU99_LUNG	Lung	chr5	1221816	1225232	SLC6A19	5_1223940_A_G	20	30			50		CCLE_WGS	0.4		0.666667
1011	ACH-000445	KNS60_CENTRAL_NERVOUS_SYSTEM	Central nervous system	chr5	1216673	1217060	SLC6A19	5_1216775_A_G	80	57			137		CCLE_WES	0.583942		1.40351
1012	ACH-000445	KNS60_CENTRAL_NERVOUS_SYSTEM	Central nervous system	chr5	1208861	1209001	SLC6A19	5_1208964_T_C	63	56			119		CCLE_WES	0.529412		1.125
1013	ACH-000445	KNS60_CENTRAL_NERVOUS_SYSTEM	Central nervous system	chr5	1216673	1217060	SLC6A19	5_1216900_G_A	106	89			195		CCLE_WES	0.54359		1.19101
1014	ACH-000446	KPNSI9S_AUTONOMIC_GANGLIA	Peripheral nervous system	chr5	1213578	1213688	SLC6A19	5_1213668_G_A	12	26	14	30	38	44	CCLE_WES	0.315789	0.318182	0.461538	0.466667	1.01111	1.00787	0
1015	ACH-000446	KPNSI9S_AUTONOMIC_GANGLIA	Peripheral nervous system	chr5	1216673	1217060	SLC6A19	5_1216775_A_G	54	22	12	14	76	26	CCLE_WES	0.710526	0.461538	2.45455	0.857143	0.349206	0.3559	0
1016	ACH-000446	KPNSI9S_AUTONOMIC_GANGLIA	Peripheral nervous system	chr5	1216673	1217060	SLC6A19	5_1216900_G_A	61	30			91		CCLE_WES	0.67033		2.03333
1017	ACH-000447	NCIH2228_LUNG	Lung	chr5	1221816	1225232	SLC6A19	5_1222481_G_A	17	40			57		CCLE_WGS	0.298246		0.425
1018	ACH-000447	NCIH2228_LUNG	Lung	chr5	1221816	1225232	SLC6A19	5_1224174_T_C	20	47			67		CCLE_WGS	0.298507		0.425532
1019	ACH-000447	NCIH2228_LUNG	Lung	chr5	1221816	1225232	SLC6A19	5_1223730_G_A	68	15			83		CCLE_WGS	0.819277		4.53333
1020	ACH-000447	NCIH2228_LUNG	Lung	chr5	1221816	1225232	SLC6A19	5_1223772_T_C	48	32			80		CCLE_WGS	0.6		1.5
1021	ACH-000447	NCIH2228_LUNG	Lung	chr5	1221816	1225232	SLC6A19	5_1223835_T_C	56	21			77		CCLE_WGS	0.727273		2.66667
1022	ACH-000447	NCIH2228_LUNG	Lung	chr5	1221816	1225232	SLC6A19	5_1223940_A_G	40	12			52		CCLE_WGS	0.769231		3.33333
1023	ACH-000447	NCIH2228_LUNG	Lung	chr5	1221816	1225232	SLC6A19	5_1224083_C_A	26	47			73		CCLE_WGS	0.356164		0.553191
1024	ACH-000447	NCIH2228_LUNG	Lung	chr5	1221816	1225232	SLC6A19	5_1224285_G_A	21	47			68		CCLE_WGS	0.308824		0.446809
1025	ACH-000447	NCIH2228_LUNG	Lung	chr5	1221816	1225232	SLC6A19	5_1224405_A_G	18	58			76		CCLE_WGS	0.236842		0.310345
1026	ACH-000447	NCIH2228_LUNG	Lung	chr5	1221816	1225232	SLC6A19	5_1225121_C_T	44	15			59		CCLE_WGS	0.745763		2.93333
1027	ACH-000447	NCIH2228_LUNG	Lung	chr5	1221816	1225232	SLC6A19	5_1223062_G_T	14	50			64		CCLE_WGS	0.21875		0.28
1028	ACH-000448	NCIH1666_LUNG	Lung	chr5	1221816	1225232	SLC6A19	5_1223700_C_T	17	16			33		CCLE_WGS	0.515152		1.0625
1029	ACH-000448	NCIH1666_LUNG	Lung	chr5	1208861	1209001	SLC6A19	5_1208964_T_C	11	10			21		CCLE_WGS	0.52381		1.1
1030	ACH-000453	MOLP2_HAEMATOPOIETIC_AND_LYMPHOID_TISSUE	Plasma cell	chr5	1216673	1217060	SLC6A19	5_1216775_A_G	31	32			63		CCLE_WES	0.492063		0.96875
1031	ACH-000454	HCC95_LUNG	Lung	chr5	1221816	1225232	SLC6A19	5_1225121_C_T	22	50			72		CCLE_WGS	0.305556		0.44
1032	ACH-000454	HCC95_LUNG	Lung	chr5	1221816	1225232	SLC6A19	5_1223940_A_G	27	33			60		CCLE_WGS	0.45		0.818182
1033	ACH-000454	HCC95_LUNG	Lung	chr5	1216673	1217060	SLC6A19	5_1216833_G_A	37	26			63		CCLE_WGS	0.587302		1.42308
1034	ACH-000454	HCC95_LUNG	Lung	chr5	1221816	1225232	SLC6A19	5_1223772_T_C	72	16			88		CCLE_WGS	0.818182		4.5
1035	ACH-000454	HCC95_LUNG	Lung	chr5	1221816	1225232	SLC6A19	5_1224405_A_G	55	29			84		CCLE_WGS	0.654762		1.89655
1036	ACH-000454	HCC95_LUNG	Lung	chr5	1221816	1225232	SLC6A19	5_1223835_T_C	22	50			72		CCLE_WGS	0.305556		0.44
1037	ACH-000454	HCC95_LUNG	Lung	chr5	1221816	1225232	SLC6A19	5_1223062_G_T	40	21			61		CCLE_WGS	0.655738		1.90476
1038	ACH-000454	HCC95_LUNG	Lung	chr5	1221816	1225232	SLC6A19	5_1224083_C_A	38	18			56		CCLE_WGS	0.678571		2.11111
1039	ACH-000454	HCC95_LUNG	Lung	chr5	1221816	1225232	SLC6A19	5_1224174_T_C	53	23			76		CCLE_WGS	0.697368		2.30435
1040	ACH-000454	HCC95_LUNG	Lung	chr5	1221816	1225232	SLC6A19	5_1223730_G_A	42	51			93		CCLE_WGS	0.451613		0.823529
1041	ACH-000454	HCC95_LUNG	Lung	chr5	1221816	1225232	SLC6A19	5_1224285_G_A	40	27			67		CCLE_WGS	0.597015		1.48148
1042	ACH-000457	CAL54_KIDNEY	Kidney	chr5	1221816	1225232	SLC6A19	5_1222499_T_C	34	19			53		CCLE_WGS	0.641509		1.78947
1043	ACH-000457	CAL54_KIDNEY	Kidney	chr5	1221816	1225232	SLC6A19	5_1224795_G_C	32	13			45		CCLE_WGS	0.711111		2.46154
1044	ACH-000457	CAL54_KIDNEY	Kidney	chr5	1221816	1225232	SLC6A19	5_1224490_G_T	33	16			49		CCLE_WGS	0.673469		2.0625
1045	ACH-000457	CAL54_KIDNEY	Kidney	chr5	1216673	1217060	SLC6A19	5_1216775_A_G	19	17			36		CCLE_WGS	0.527778		1.11765
1046	ACH-000457	CAL54_KIDNEY	Kidney	chr5	1216673	1217060	SLC6A19	5_1216900_G_A	22	18			40		CCLE_WGS	0.55		1.22222
1047	ACH-000457	CAL54_KIDNEY	Kidney	chr5	1221816	1225232	SLC6A19	5_1223845_A_G	25	16			41		CCLE_WGS	0.609756		1.5625
1048	ACH-000457	CAL54_KIDNEY	Kidney	chr5	1221816	1225232	SLC6A19	5_1224051_C_T	31	10			41		CCLE_WGS	0.756098		3.1
1049	ACH-000459	TUHR10TKB_KIDNEY	Kidney	chr5	1216673	1217060	SLC6A19	5_1216900_G_A	46	58			104		CCLE_WES	0.442308		0.793103
1050	ACH-000459	TUHR10TKB_KIDNEY	Kidney	chr5	1216673	1217060	SLC6A19	5_1216775_A_G	36	28			64		CCLE_WES	0.5625		1.28571
1051	ACH-000462	NALM1_HAEMATOPOIETIC_AND_LYMPHOID_TISSUE	Blood	chr5	1208861	1209001	SLC6A19	5_1208964_T_C	17	23			40		CCLE_WES	0.425		0.73913
1052	ACH-000462	NALM1_HAEMATOPOIETIC_AND_LYMPHOID_TISSUE	Blood	chr5	1216673	1217060	SLC6A19	5_1216900_G_A	43	33			76		CCLE_WES	0.565789		1.30303
1053	ACH-000462	NALM1_HAEMATOPOIETIC_AND_LYMPHOID_TISSUE	Blood	chr5	1213578	1213688	SLC6A19	5_1213668_G_A	17	13			30		CCLE_WES	0.566667		1.30769
1054	ACH-000463	NCIH460_LUNG	Lung	chr5	1208861	1209001	SLC6A19	5_1208964_T_C	15	21			36		CCLE_WGS	0.416667		0.714286
1055	ACH-000464	CAS1_CENTRAL_NERVOUS_SYSTEM	Central nervous system	chr5	1221816	1225232	SLC6A19	5_1223835_T_C	15	64			79		CCLE_WGS	0.189873		0.234375
1056	ACH-000464	CAS1_CENTRAL_NERVOUS_SYSTEM	Central nervous system	chr5	1221816	1225232	SLC6A19	5_1223772_T_C	83	10			93		CCLE_WGS	0.892473		8.3
1057	ACH-000464	CAS1_CENTRAL_NERVOUS_SYSTEM	Central nervous system	chr5	1221816	1225232	SLC6A19	5_1223730_G_A	24	64			88		CCLE_WGS	0.272727		0.375
1058	ACH-000464	CAS1_CENTRAL_NERVOUS_SYSTEM	Central nervous system	chr5	1221816	1225232	SLC6A19	5_1223940_A_G	24	50			74		CCLE_WGS	0.324324		0.48
1059	ACH-000464	CAS1_CENTRAL_NERVOUS_SYSTEM	Central nervous system	chr5	1221816	1225232	SLC6A19	5_1225121_C_T	18	57			75		CCLE_WGS	0.24		0.315789
1060	ACH-000464	CAS1_CENTRAL_NERVOUS_SYSTEM	Central nervous system	chr5	1221816	1225232	SLC6A19	5_1224174_T_C	49	19			68		CCLE_WGS	0.720588		2.57895
1061	ACH-000464	CAS1_CENTRAL_NERVOUS_SYSTEM	Central nervous system	chr5	1221816	1225232	SLC6A19	5_1224083_C_A	66	25			91		CCLE_WGS	0.725275		2.64
1062	ACH-000464	CAS1_CENTRAL_NERVOUS_SYSTEM	Central nervous system	chr5	1221816	1225232	SLC6A19	5_1224405_A_G	60	25			85		CCLE_WGS	0.705882		2.4
1063	ACH-000464	CAS1_CENTRAL_NERVOUS_SYSTEM	Central nervous system	chr5	1221816	1225232	SLC6A19	5_1224285_G_A	65	22			87		CCLE_WGS	0.747126		2.95455
1064	ACH-000464	CAS1_CENTRAL_NERVOUS_SYSTEM	Central nervous system	chr5	1221816	1225232	SLC6A19	5_1223062_G_T	49	20			69		CCLE_WGS	0.710145		2.45
1065	ACH-000466	SNU216_STOMACH	Gastric	chr5	1216673	1217060	SLC6A19	5_1216775_A_G	36	23			59		CCLE_WES	0.610169		1.56522
1066	ACH-000466	SNU216_STOMACH	Gastric	chr5	1213578	1213688	SLC6A19	5_1213668_G_A	9	13			22		CCLE_WES	0.409091		0.692308
1067	ACH-000466	SNU216_STOMACH	Gastric	chr5	1208861	1209001	SLC6A19	5_1208964_T_C	17	21			38		CCLE_WES	0.447368		0.809524
1068	ACH-000471	LI7_LIVER	Liver	chr5	1216673	1217060	SLC6A19	5_1216775_A_G	55	94	133	272	149	405	CCLE_WES	0.369128	0.328395	0.585106	0.488971	0.835695	0.834168	0
1069	ACH-000473	RT112_URINARY_TRACT	Urinary tract	chr5	1221816	1225232	SLC6A19	5_1223940_A_G	19	16			35		CCLE_WGS	0.542857		1.1875
1070	ACH-000473	RT112_URINARY_TRACT	Urinary tract	chr5	1221816	1225232	SLC6A19	5_1223874_A_G	19	8			27		CCLE_WGS	0.703704		2.375
1071	ACH-000473	RT112_URINARY_TRACT	Urinary tract	chr5	1221816	1225232	SLC6A19	5_1223700_C_T	23	18			41		CCLE_WGS	0.560976		1.27778
1072	ACH-000473	RT112_URINARY_TRACT	Urinary tract	chr5	1221816	1225232	SLC6A19	5_1224250_G_A	13	18			31		CCLE_WGS	0.419355		0.722222
1073	ACH-000473	RT112_URINARY_TRACT	Urinary tract	chr5	1221816	1225232	SLC6A19	5_1224795_G_C	20	22			42		CCLE_WGS	0.47619		0.909091
1074	ACH-000473	RT112_URINARY_TRACT	Urinary tract	chr5	1221816	1225232	SLC6A19	5_1225121_C_T	15	20			35		CCLE_WGS	0.428571		0.75
1075	ACH-000473	RT112_URINARY_TRACT	Urinary tract	chr5	1221816	1225232	SLC6A19	5_1222667_G_A	19	17			36		CCLE_WGS	0.527778		1.11765
1076	ACH-000473	RT112_URINARY_TRACT	Urinary tract	chr5	1221816	1225232	SLC6A19	5_1222480_C_T	20	19			39		CCLE_WGS	0.512821		1.05263
1077	ACH-000473	RT112_URINARY_TRACT	Urinary tract	chr5	1216673	1217060	SLC6A19	5_1216900_G_A	26	19			45		CCLE_WGS	0.577778		1.36842
1078	ACH-000473	RT112_URINARY_TRACT	Urinary tract	chr5	1213578	1213688	SLC6A19	5_1213668_G_A	15	11			26		CCLE_WGS	0.576923		1.36364
1079	ACH-000473	RT112_URINARY_TRACT	Urinary tract	chr5	1221816	1225232	SLC6A19	5_1224405_A_G	31	25			56		CCLE_WGS	0.553571		1.24
1080	ACH-000473	RT112_URINARY_TRACT	Urinary tract	chr5	1221816	1225232	SLC6A19	5_1224003_C_T	12	12			24		CCLE_WGS	0.5		1
1081	ACH-000475	HUH1_LIVER	Liver	chr5	1212418	1212599	SLC6A19	5_1212445_C_T	58	57			115		CCLE_WES	0.504348		1.01754
1082	ACH-000478	SNU387_LIVER	Liver	chr5	1221816	1225232	SLC6A19	5_1224174_T_C	11	39			50		CCLE_WGS	0.22		0.282051
1083	ACH-000478	SNU387_LIVER	Liver	chr5	1221816	1225232	SLC6A19	5_1224285_G_A	13	32			45		CCLE_WGS	0.288889		0.40625
1084	ACH-000478	SNU387_LIVER	Liver	chr5	1221816	1225232	SLC6A19	5_1224083_C_A	8	23			31		CCLE_WGS	0.258065		0.347826
1085	ACH-000478	SNU387_LIVER	Liver	chr5	1221816	1225232	SLC6A19	5_1223940_A_G	31	10			41		CCLE_WGS	0.756098		3.1
1086	ACH-000478	SNU387_LIVER	Liver	chr5	1221816	1225232	SLC6A19	5_1223835_T_C	30	19			49		CCLE_WGS	0.612245		1.57895
1087	ACH-000478	SNU387_LIVER	Liver	chr5	1221816	1225232	SLC6A19	5_1223772_T_C	28	41			69		CCLE_WGS	0.405797		0.682927
1088	ACH-000478	SNU387_LIVER	Liver	chr5	1221816	1225232	SLC6A19	5_1223700_C_T	51	11			62		CCLE_WGS	0.822581		4.63636
1089	ACH-000478	SNU387_LIVER	Liver	chr5	1221816	1225232	SLC6A19	5_1223062_G_T	15	31			46		CCLE_WGS	0.326087		0.483871
1090	ACH-000478	SNU387_LIVER	Liver	chr5	1221816	1225232	SLC6A19	5_1224405_A_G	10	30			40		CCLE_WGS	0.25		0.333333
1091	ACH-000478	SNU387_LIVER	Liver	chr5	1221816	1225232	SLC6A19	5_1225121_C_T	36	11			47		CCLE_WGS	0.765957		3.27273
1092	ACH-000481	NCIH2170_LUNG	Lung	chr5	1221816	1225232	SLC6A19	5_1225043_C_T	15	30			45		CCLE_WGS	0.333333		0.5
1093	ACH-000481	NCIH2170_LUNG	Lung	chr5	1208861	1209001	SLC6A19	5_1208964_T_C	19	11			30		CCLE_WGS	0.633333		1.72727
1094	ACH-000481	NCIH2170_LUNG	Lung	chr5	1221816	1225232	SLC6A19	5_1223772_T_C	46	68			114		CCLE_WGS	0.403509		0.676471
1095	ACH-000483	SNU182_LIVER	Liver	chr5	1208861	1209001	SLC6A19	5_1208964_T_C	18	13			31		CCLE_WGS	0.580645		1.38462
1096	ACH-000483	SNU182_LIVER	Liver	chr5	1213578	1213688	SLC6A19	5_1213668_G_A	26	14			40		CCLE_WGS	0.65		1.85714
1097	ACH-000483	SNU182_LIVER	Liver	chr5	1221816	1225232	SLC6A19	5_1223062_G_T	36	19			55		CCLE_WGS	0.654545		1.89474
1098	ACH-000483	SNU182_LIVER	Liver	chr5	1221816	1225232	SLC6A19	5_1223730_G_A	47	34			81		CCLE_WGS	0.580247		1.38235
1099	ACH-000483	SNU182_LIVER	Liver	chr5	1221816	1225232	SLC6A19	5_1223772_T_C	58	24			82		CCLE_WGS	0.707317		2.41667
1100	ACH-000483	SNU182_LIVER	Liver	chr5	1221816	1225232	SLC6A19	5_1223835_T_C	21	42			63		CCLE_WGS	0.333333		0.5
1101	ACH-000483	SNU182_LIVER	Liver	chr5	1221816	1225232	SLC6A19	5_1224405_A_G	28	26			54		CCLE_WGS	0.518519		1.07692
1102	ACH-000483	SNU182_LIVER	Liver	chr5	1221816	1225232	SLC6A19	5_1224285_G_A	33	33			66		CCLE_WGS	0.5		1
1103	ACH-000483	SNU182_LIVER	Liver	chr5	1221816	1225232	SLC6A19	5_1224083_C_A	34	27			61		CCLE_WGS	0.557377		1.25926
1104	ACH-000483	SNU182_LIVER	Liver	chr5	1221816	1225232	SLC6A19	5_1223940_A_G	17	39			56		CCLE_WGS	0.303571		0.435897
1105	ACH-000483	SNU182_LIVER	Liver	chr5	1221816	1225232	SLC6A19	5_1225121_C_T	21	27			48		CCLE_WGS	0.4375		0.777778
1106	ACH-000483	SNU182_LIVER	Liver	chr5	1221816	1225232	SLC6A19	5_1224174_T_C	35	24			59		CCLE_WGS	0.59322		1.45833
1107	ACH-000485	GSU_STOMACH	Gastric	chr5	1216673	1217060	SLC6A19	5_1216775_A_G	42	20			62		CCLE_WES	0.677419		2.1
1108	ACH-000485	GSU_STOMACH	Gastric	chr5	1208861	1209001	SLC6A19	5_1208964_T_C	34	14			48		CCLE_WES	0.708333		2.42857
1109	ACH-000486	KU1919_URINARY_TRACT	Urinary tract	chr5	1221816	1225232	SLC6A19	5_1224083_C_A	26	25			51		CCLE_WGS	0.509804		1.04
1110	ACH-000486	KU1919_URINARY_TRACT	Urinary tract	chr5	1221816	1225232	SLC6A19	5_1223772_T_C	42	71			113		CCLE_WGS	0.371681		0.591549
1111	ACH-000487	F36P_HAEMATOPOIETIC_AND_LYMPHOID_TISSUE	Blood	chr5	1213578	1213688	SLC6A19	5_1213668_G_A	23	12	45	25	35	70	CCLE_WES	0.657143	0.642857	1.91667	1.8	0.93913	0.949103	0
1112	ACH-000487	F36P_HAEMATOPOIETIC_AND_LYMPHOID_TISSUE	Blood	chr5	1216673	1217060	SLC6A19	5_1216775_A_G	44	49	22	44	93	66	CCLE_WES	0.473118	0.333333	0.897959	0.5	0.556818	0.562429	0
1113	ACH-000488	TE11_OESOPHAGUS	Esophagus	chr5	1221816	1225232	SLC6A19	5_1222499_T_C	15	44			59		CCLE_WGS	0.254237		0.340909
1114	ACH-000488	TE11_OESOPHAGUS	Esophagus	chr5	1221816	1225232	SLC6A19	5_1223835_T_C	53	12			65		CCLE_WGS	0.815385		4.41667
1115	ACH-000488	TE11_OESOPHAGUS	Esophagus	chr5	1221816	1225232	SLC6A19	5_1223845_A_G	13	55			68		CCLE_WGS	0.191176		0.236364
1116	ACH-000488	TE11_OESOPHAGUS	Esophagus	chr5	1221816	1225232	SLC6A19	5_1223940_A_G	37	13			50		CCLE_WGS	0.74		2.84615
1117	ACH-000488	TE11_OESOPHAGUS	Esophagus	chr5	1221816	1225232	SLC6A19	5_1225121_C_T	39	20			59		CCLE_WGS	0.661017		1.95
1118	ACH-000492	MUTZ5_HAEMATOPOIETIC_AND_LYMPHOID_TISSUE	Blood	chr5	1208861	1209001	SLC6A19	5_1208964_T_C	23	27			50		CCLE_WES	0.46		0.851852
1119	ACH-000492	MUTZ5_HAEMATOPOIETIC_AND_LYMPHOID_TISSUE	Blood	chr5	1208861	1209001	SLC6A19	5_1208985_G_A	19	19			38		CCLE_WES	0.5		1
1120	ACH-000492	MUTZ5_HAEMATOPOIETIC_AND_LYMPHOID_TISSUE	Blood	chr5	1212418	1212599	SLC6A19	5_1212491_G_A	71	70			141		CCLE_WES	0.503546		1.01429
1121	ACH-000492	MUTZ5_HAEMATOPOIETIC_AND_LYMPHOID_TISSUE	Blood	chr5	1213578	1213688	SLC6A19	5_1213668_G_A	28	15			43		CCLE_WES	0.651163		1.86667
1122	ACH-000493	SNU423_LIVER	Liver	chr5	1221816	1225232	SLC6A19	5_1223772_T_C	51	41			92		CCLE_WGS	0.554348		1.2439
1123	ACH-000493	SNU423_LIVER	Liver	chr5	1221816	1225232	SLC6A19	5_1223062_G_T	18	41			59		CCLE_WGS	0.305085		0.439024
1124	ACH-000493	SNU423_LIVER	Liver	chr5	1221816	1225232	SLC6A19	5_1224001_T_C	14	26			40		CCLE_WGS	0.35		0.538462
1125	ACH-000493	SNU423_LIVER	Liver	chr5	1221816	1225232	SLC6A19	5_1224051_C_T	13	21			34		CCLE_WGS	0.382353		0.619048
1126	ACH-000493	SNU423_LIVER	Liver	chr5	1221816	1225232	SLC6A19	5_1224083_C_A	14	20			34		CCLE_WGS	0.411765		0.7
1127	ACH-000493	SNU423_LIVER	Liver	chr5	1221816	1225232	SLC6A19	5_1224174_T_C	18	36			54		CCLE_WGS	0.333333		0.5
1128	ACH-000493	SNU423_LIVER	Liver	chr5	1221816	1225232	SLC6A19	5_1224285_G_A	25	27			52		CCLE_WGS	0.480769		0.925926
1129	ACH-000493	SNU423_LIVER	Liver	chr5	1221816	1225232	SLC6A19	5_1224405_A_G	15	42			57		CCLE_WGS	0.263158		0.357143
1130	ACH-000493	SNU423_LIVER	Liver	chr5	1221816	1225232	SLC6A19	5_1224490_G_T	18	38			56		CCLE_WGS	0.321429		0.473684
1131	ACH-000493	SNU423_LIVER	Liver	chr5	1221816	1225232	SLC6A19	5_1224795_G_C	16	36			52		CCLE_WGS	0.307692		0.444444
1132	ACH-000493	SNU423_LIVER	Liver	chr5	1216673	1217060	SLC6A19	5_1216775_A_G	13	41			54		CCLE_WGS	0.240741		0.317073
1133	ACH-000495	TUHR4TKB_KIDNEY	Kidney	chr5	1212418	1212599	SLC6A19	5_1212494_C_T	66	101			167		CCLE_WES	0.39521		0.653465
1134	ACH-000495	TUHR4TKB_KIDNEY	Kidney	chr5	1208861	1209001	SLC6A19	5_1208964_T_C	48	18			66		CCLE_WES	0.727273		2.66667
1135	ACH-000496	NCIH1792_LUNG	Lung	chr5	1221816	1225232	SLC6A19	5_1223730_G_A	13	19			32		CCLE_WGS	0.40625		0.684211
1136	ACH-000496	NCIH1792_LUNG	Lung	chr5	1221816	1225232	SLC6A19	5_1223700_C_T	23	20			43		CCLE_WGS	0.534884		1.15
1137	ACH-000500	SNU46_UPPER_AERODIGESTIVE_TRACT	Upper aerodigestive	chr5	1208861	1209001	SLC6A19	5_1208964_T_C	43	38			81		CCLE_WES	0.530864		1.13158
1138	ACH-000500	SNU46_UPPER_AERODIGESTIVE_TRACT	Upper aerodigestive	chr5	1216673	1217060	SLC6A19	5_1216900_G_A	97	63			160		CCLE_WES	0.60625		1.53968
1139	ACH-000502	TCCPAN2_PANCREAS	Pancreas	chr5	1208861	1209001	SLC6A19	5_1208964_T_C	24	22			46		CCLE_WES	0.521739		1.09091
1140	ACH-000503	BICR16_UPPER_AERODIGESTIVE_TRACT	Upper aerodigestive	chr5	1213578	1213688	SLC6A19	5_1213668_G_A	28	19			47		CCLE_WES	0.595745		1.47368
1141	ACH-000503	BICR16_UPPER_AERODIGESTIVE_TRACT	Upper aerodigestive	chr5	1208861	1209001	SLC6A19	5_1208964_T_C	63	29			92		CCLE_WES	0.684783		2.17241
1142	ACH-000505	RKN_SOFT_TISSUE	Soft tissue	chr5	1216673	1217060	SLC6A19	5_1216775_A_G	60	34			94		CCLE_WES	0.638298		1.76471
1143	ACH-000505	RKN_SOFT_TISSUE	Soft tissue	chr5	1221816	1225232	SLC6A19	5_1225121_C_T	40	21			61		CCLE_WGS	0.655738		1.90476
1144	ACH-000505	RKN_SOFT_TISSUE	Soft tissue	chr5	1221816	1225232	SLC6A19	5_1224795_G_C	42	25			67		CCLE_WGS	0.626866		1.68
1145	ACH-000505	RKN_SOFT_TISSUE	Soft tissue	chr5	1221816	1225232	SLC6A19	5_1224490_G_T	43	29			72		CCLE_WGS	0.597222		1.48276
1146	ACH-000505	RKN_SOFT_TISSUE	Soft tissue	chr5	1221816	1225232	SLC6A19	5_1223940_A_G	33	14			47		CCLE_WGS	0.702128		2.35714
1147	ACH-000505	RKN_SOFT_TISSUE	Soft tissue	chr5	1221816	1225232	SLC6A19	5_1223835_T_C	21	15			36		CCLE_WGS	0.583333		1.4
1148	ACH-000505	RKN_SOFT_TISSUE	Soft tissue	chr5	1221816	1225232	SLC6A19	5_1223700_C_T	36	14			50		CCLE_WGS	0.72		2.57143
1149	ACH-000505	RKN_SOFT_TISSUE	Soft tissue	chr5	1216673	1217060	SLC6A19	5_1216775_A_G	41	17			58		CCLE_WGS	0.706897		2.41176
1150	ACH-000506	NCIH146_LUNG	Lung	chr5	1221816	1225232	SLC6A19	5_1223730_G_A	18	15			33		CCLE_WGS	0.545455		1.2
1151	ACH-000506	NCIH146_LUNG	Lung	chr5	1221816	1225232	SLC6A19	5_1223700_C_T	11	37			48		CCLE_WGS	0.229167		0.297297
1152	ACH-000506	NCIH146_LUNG	Lung	chr5	1208861	1209001	SLC6A19	5_1208964_T_C	15	27			42		CCLE_WGS	0.357143		0.555556
1153	ACH-000506	NCIH146_LUNG	Lung	chr5	1213578	1213688	SLC6A19	5_1213668_G_A	20	28			48		CCLE_WGS	0.416667		0.714286
1154	ACH-000506	NCIH146_LUNG	Lung	chr5	1221816	1225232	SLC6A19	5_1222672_T_C	14	59			73		CCLE_WGS	0.191781		0.237288
1155	ACH-000507	KE39_STOMACH	Gastric	chr5	1208861	1209001	SLC6A19	5_1208964_T_C	21	33			54		CCLE_WES	0.388889		0.636364
1156	ACH-000508	CORL88_LUNG	Lung	chr5	1208861	1209001	SLC6A19	5_1208964_T_C	29	10			39		CCLE_WGS	0.74359		2.9
1157	ACH-000508	CORL88_LUNG	Lung	chr5	1213578	1213688	SLC6A19	5_1213668_G_A	43	20			63		CCLE_WGS	0.68254		2.15
1158	ACH-000508	CORL88_LUNG	Lung	chr5	1221816	1225232	SLC6A19	5_1223772_T_C	76	136			212		CCLE_WGS	0.358491		0.558824
1159	ACH-000510	NCIH1299_LUNG	Lung	chr5	1221816	1225232	SLC6A19	5_1223772_T_C	58	80			138		CCLE_WGS	0.42029		0.725
1160	ACH-000511	CALU1_LUNG	Lung	chr5	1208861	1209001	SLC6A19	5_1208964_T_C	29	10			39		CCLE_WGS	0.74359		2.9
1161	ACH-000511	CALU1_LUNG	Lung	chr5	1213578	1213688	SLC6A19	5_1213668_G_A	57	15			72		CCLE_WES	0.791667		3.8
1162	ACH-000511	CALU1_LUNG	Lung	chr5	1208861	1209001	SLC6A19	5_1208964_T_C	80	17			97		CCLE_WES	0.824742		4.70588
1163	ACH-000513	SNU1272_KIDNEY	Kidney	chr5	1216673	1217060	SLC6A19	5_1216775_A_G	30	21			51		CCLE_WES	0.588235		1.42857
1164	ACH-000514	NCIH1092_LUNG	Lung	chr5	1221816	1225232	SLC6A19	5_1224174_T_C	24	22			46		CCLE_WGS	0.521739		1.09091
1165	ACH-000514	NCIH1092_LUNG	Lung	chr5	1221816	1225232	SLC6A19	5_1223845_A_G	16	24			40		CCLE_WGS	0.4		0.666667
1166	ACH-000514	NCIH1092_LUNG	Lung	chr5	1221816	1225232	SLC6A19	5_1223772_T_C	47	23			70		CCLE_WGS	0.671429		2.04348
1167	ACH-000514	NCIH1092_LUNG	Lung	chr5	1221816	1225232	SLC6A19	5_1222499_T_C	14	19			33		CCLE_WGS	0.424242		0.736842
1168	ACH-000514	NCIH1092_LUNG	Lung	chr5	1221816	1225232	SLC6A19	5_1223062_G_T	27	13			40		CCLE_WGS	0.675		2.07692
1169	ACH-000514	NCIH1092_LUNG	Lung	chr5	1216673	1217060	SLC6A19	5_1216900_G_A	17	32			49		CCLE_WGS	0.346939		0.53125
1170	ACH-000514	NCIH1092_LUNG	Lung	chr5	1221816	1225232	SLC6A19	5_1224285_G_A	31	17			48		CCLE_WGS	0.645833		1.82353
1171	ACH-000514	NCIH1092_LUNG	Lung	chr5	1208861	1209001	SLC6A19	5_1208964_T_C	11	12			23		CCLE_WGS	0.478261		0.916667
1172	ACH-000514	NCIH1092_LUNG	Lung	chr5	1221816	1225232	SLC6A19	5_1224001_T_C	29	12			41		CCLE_WGS	0.707317		2.41667
1173	ACH-000514	NCIH1092_LUNG	Lung	chr5	1221816	1225232	SLC6A19	5_1224405_A_G	21	16			37		CCLE_WGS	0.567568		1.3125
1174	ACH-000514	NCIH1092_LUNG	Lung	chr5	1221816	1225232	SLC6A19	5_1224083_C_A	29	11			40		CCLE_WGS	0.725		2.63636
1175	ACH-000515	HCC33_LUNG	Lung	chr5	1221816	1225232	SLC6A19	5_1222499_T_C	16	22			38		CCLE_WGS	0.421053		0.727273
1176	ACH-000515	HCC33_LUNG	Lung	chr5	1216673	1217060	SLC6A19	5_1216900_G_A	15	17			32		CCLE_WGS	0.46875		0.882353
1177	ACH-000515	HCC33_LUNG	Lung	chr5	1213578	1213688	SLC6A19	5_1213668_G_A	11	12			23		CCLE_WGS	0.478261		0.916667
1178	ACH-000515	HCC33_LUNG	Lung	chr5	1208861	1209001	SLC6A19	5_1208964_T_C	8	10			18		CCLE_WGS	0.444444		0.8
1179	ACH-000515	HCC33_LUNG	Lung	chr5	1221816	1225232	SLC6A19	5_1223730_G_A	22	23			45		CCLE_WGS	0.488889		0.956522
1180	ACH-000515	HCC33_LUNG	Lung	chr5	1221816	1225232	SLC6A19	5_1223835_T_C	18	12			30		CCLE_WGS	0.6		1.5
1181	ACH-000515	HCC33_LUNG	Lung	chr5	1221816	1225232	SLC6A19	5_1223845_A_G	14	20			34		CCLE_WGS	0.411765		0.7
1182	ACH-000515	HCC33_LUNG	Lung	chr5	1221816	1225232	SLC6A19	5_1223940_A_G	17	12			29		CCLE_WGS	0.586207		1.41667
1183	ACH-000515	HCC33_LUNG	Lung	chr5	1221816	1225232	SLC6A19	5_1225121_C_T	16	15			31		CCLE_WGS	0.516129		1.06667
1184	ACH-000517	SNU410_PANCREAS	Pancreas	chr5	1208861	1209001	SLC6A19	5_1208964_T_C	16	35			51		CCLE_WES	0.313725		0.457143
1185	ACH-000519	PEER_HAEMATOPOIETIC_AND_LYMPHOID_TISSUE	Blood	chr5	1216673	1217060	SLC6A19	5_1216900_G_A	36	31			67		CCLE_WES	0.537313		1.16129
1186	ACH-000520	59M_OVARY	Ovary	chr5	1208861	1209001	SLC6A19	5_1208964_T_C	25	11			36		CCLE_WGS	0.694444		2.27273
1187	ACH-000520	59M_OVARY	Ovary	chr5	1216673	1217060	SLC6A19	5_1216900_G_A	8	37			45		CCLE_WGS	0.177778		0.216216
1188	ACH-000520	59M_OVARY	Ovary	chr5	1221816	1225232	SLC6A19	5_1222499_T_C	16	38			54		CCLE_WGS	0.296296		0.421053
1189	ACH-000520	59M_OVARY	Ovary	chr5	1221816	1225232	SLC6A19	5_1223062_G_T	43	15			58		CCLE_WGS	0.741379		2.86667
1190	ACH-000520	59M_OVARY	Ovary	chr5	1221816	1225232	SLC6A19	5_1223772_T_C	57	16			73		CCLE_WGS	0.780822		3.5625
1191	ACH-000520	59M_OVARY	Ovary	chr5	1221816	1225232	SLC6A19	5_1223845_A_G	12	33			45		CCLE_WGS	0.266667		0.363636
1192	ACH-000520	59M_OVARY	Ovary	chr5	1221816	1225232	SLC6A19	5_1224001_T_C	35	13			48		CCLE_WGS	0.729167		2.69231
1193	ACH-000520	59M_OVARY	Ovary	chr5	1221816	1225232	SLC6A19	5_1224174_T_C	38	15			53		CCLE_WGS	0.716981		2.53333
1194	ACH-000520	59M_OVARY	Ovary	chr5	1221816	1225232	SLC6A19	5_1224285_G_A	31	14			45		CCLE_WGS	0.688889		2.21429
1195	ACH-000520	59M_OVARY	Ovary	chr5	1221816	1225232	SLC6A19	5_1224405_A_G	43	16			59		CCLE_WGS	0.728814		2.6875
1196	ACH-000520	59M_OVARY	Ovary	chr5	1221816	1225232	SLC6A19	5_1224083_C_A	47	12			59		CCLE_WGS	0.79661		3.91667
1197	ACH-000521	NCIH2030_LUNG	Lung	chr5	1221816	1225232	SLC6A19	5_1224490_G_T	40	21			61		CCLE_WGS	0.655738		1.90476
1198	ACH-000521	NCIH2030_LUNG	Lung	chr5	1216673	1217060	SLC6A19	5_1216775_A_G	23	12			35		CCLE_WGS	0.657143		1.91667
1199	ACH-000521	NCIH2030_LUNG	Lung	chr5	1221816	1225232	SLC6A19	5_1225121_C_T	36	21			57		CCLE_WGS	0.631579		1.71429
1200	ACH-000521	NCIH2030_LUNG	Lung	chr5	1221816	1225232	SLC6A19	5_1224795_G_C	38	15			53		CCLE_WGS	0.716981		2.53333
1201	ACH-000521	NCIH2030_LUNG	Lung	chr5	1221816	1225232	SLC6A19	5_1224051_C_T	22	15			37		CCLE_WGS	0.594595		1.46667
1202	ACH-000521	NCIH2030_LUNG	Lung	chr5	1221816	1225232	SLC6A19	5_1224003_C_T	26	10			36		CCLE_WGS	0.722222		2.6
1203	ACH-000521	NCIH2030_LUNG	Lung	chr5	1221816	1225232	SLC6A19	5_1224001_T_C	25	10			35		CCLE_WGS	0.714286		2.5
1204	ACH-000521	NCIH2030_LUNG	Lung	chr5	1221816	1225232	SLC6A19	5_1223940_A_G	34	8			42		CCLE_WGS	0.809524		4.25
1205	ACH-000521	NCIH2030_LUNG	Lung	chr5	1221816	1225232	SLC6A19	5_1223835_T_C	36	9			45		CCLE_WGS	0.8		4
1206	ACH-000521	NCIH2030_LUNG	Lung	chr5	1221816	1225232	SLC6A19	5_1223730_G_A	29	17			46		CCLE_WGS	0.630435		1.70588
1207	ACH-000523	NCIH1184_LUNG	Lung	chr5	1213578	1213688	SLC6A19	5_1213668_G_A	13	29			42		CCLE_WES	0.309524		0.448276
1208	ACH-000523	NCIH1184_LUNG	Lung	chr5	1221816	1225232	SLC6A19	5_1225121_C_T	41	18			59		CCLE_WGS	0.694915		2.27778
1209	ACH-000523	NCIH1184_LUNG	Lung	chr5	1221816	1225232	SLC6A19	5_1222798_G_A	21	32			53		CCLE_WGS	0.396226		0.65625
1210	ACH-000523	NCIH1184_LUNG	Lung	chr5	1221816	1225232	SLC6A19	5_1223062_G_T	15	37			52		CCLE_WGS	0.288462		0.405405
1211	ACH-000523	NCIH1184_LUNG	Lung	chr5	1221816	1225232	SLC6A19	5_1223772_T_C	45	60			105		CCLE_WGS	0.428571		0.75
1212	ACH-000523	NCIH1184_LUNG	Lung	chr5	1221816	1225232	SLC6A19	5_1223835_T_C	42	19			61		CCLE_WGS	0.688525		2.21053
1213	ACH-000523	NCIH1184_LUNG	Lung	chr5	1221816	1225232	SLC6A19	5_1223940_A_G	30	19			49		CCLE_WGS	0.612245		1.57895
1214	ACH-000523	NCIH1184_LUNG	Lung	chr5	1221816	1225232	SLC6A19	5_1224083_C_A	11	23			34		CCLE_WGS	0.323529		0.478261
1215	ACH-000523	NCIH1184_LUNG	Lung	chr5	1221816	1225232	SLC6A19	5_1224285_G_A	15	26			41		CCLE_WGS	0.365854		0.576923
1216	ACH-000523	NCIH1184_LUNG	Lung	chr5	1221816	1225232	SLC6A19	5_1224405_A_G	23	42			65		CCLE_WGS	0.353846		0.547619
1217	ACH-000523	NCIH1184_LUNG	Lung	chr5	1213578	1213688	SLC6A19	5_1213668_G_A	8	24			32		CCLE_WGS	0.25		0.333333
1218	ACH-000523	NCIH1184_LUNG	Lung	chr5	1221816	1225232	SLC6A19	5_1224174_T_C	28	39			67		CCLE_WGS	0.41791		0.717949
1219	ACH-000523	NCIH1184_LUNG	Lung	chr5	1221816	1225232	SLC6A19	5_1223730_G_A	82	15			97		CCLE_WGS	0.845361		5.46667
1220	ACH-000525	NCIH2171_LUNG	Lung	chr5	1208861	1209001	SLC6A19	5_1208964_T_C	12	19			31		CCLE_WGS	0.387097		0.631579
1221	ACH-000528	ABC1_LUNG	Lung	chr5	1221816	1225232	SLC6A19	5_1223062_G_T	48	73			121		CCLE_WGS	0.396694		0.657534
1222	ACH-000528	ABC1_LUNG	Lung	chr5	1221816	1225232	SLC6A19	5_1224405_A_G	58	82			140		CCLE_WGS	0.414286		0.707317
1223	ACH-000528	ABC1_LUNG	Lung	chr5	1221816	1225232	SLC6A19	5_1224083_C_A	41	64			105		CCLE_WGS	0.390476		0.640625
1224	ACH-000528	ABC1_LUNG	Lung	chr5	1221816	1225232	SLC6A19	5_1223940_A_G	70	52			122		CCLE_WGS	0.57377		1.34615
1225	ACH-000528	ABC1_LUNG	Lung	chr5	1221816	1225232	SLC6A19	5_1225121_C_T	76	42			118		CCLE_WGS	0.644068		1.80952
1226	ACH-000528	ABC1_LUNG	Lung	chr5	1221816	1225232	SLC6A19	5_1223835_T_C	67	57			124		CCLE_WGS	0.540323		1.17544
1227	ACH-000528	ABC1_LUNG	Lung	chr5	1221816	1225232	SLC6A19	5_1223772_T_C	71	100			171		CCLE_WGS	0.415205		0.71
1228	ACH-000528	ABC1_LUNG	Lung	chr5	1221816	1225232	SLC6A19	5_1224285_G_A	52	76			128		CCLE_WGS	0.40625		0.684211
1229	ACH-000528	ABC1_LUNG	Lung	chr5	1221816	1225232	SLC6A19	5_1223700_C_T	127	33			160		CCLE_WGS	0.79375		3.84848
1230	ACH-000528	ABC1_LUNG	Lung	chr5	1221816	1225232	SLC6A19	5_1224174_T_C	61	82			143		CCLE_WGS	0.426573		0.743902
1231	ACH-000531	RS5_FIBROBLAST	Fibroblast	chr5	1216673	1217060	SLC6A19	5_1216900_G_A	48	51			99		CCLE_WES	0.484848		0.941176
1232	ACH-000531	RS5_FIBROBLAST	Fibroblast	chr5	1213578	1213688	SLC6A19	5_1213668_G_A	24	16			40		CCLE_WES	0.6		1.5
1233	ACH-000531	RS5_FIBROBLAST	Fibroblast	chr5	1208861	1209001	SLC6A19	5_1208964_T_C	28	17			45		CCLE_WES	0.622222		1.64706
1234	ACH-000532	SNU61_LARGE_INTESTINE	Colorectal	chr5	1216673	1217060	SLC6A19	5_1216775_A_G	41	13			54		CCLE_WES	0.759259		3.15385
1235	ACH-000532	SNU61_LARGE_INTESTINE	Colorectal	chr5	1208861	1209001	SLC6A19	5_1208964_T_C	26	14			40		CCLE_WES	0.65		1.85714
1236	ACH-000534	WSUDLCL2_HAEMATOPOIETIC_AND_LYMPHOID_TISSUE	Lymphocyte	chr5	1216673	1217060	SLC6A19	5_1216900_G_A	25	40			65		CCLE_WES	0.384615		0.625
1237	ACH-000536	BT20_BREAST	Breast	chr5	1221816	1225232	SLC6A19	5_1223730_G_A	19	78			97		CCLE_WGS	0.195876		0.24359
1238	ACH-000536	BT20_BREAST	Breast	chr5	1208861	1209001	SLC6A19	5_1208964_T_C	41	22			63		CCLE_WGS	0.650794		1.86364
1239	ACH-000536	BT20_BREAST	Breast	chr5	1221816	1225232	SLC6A19	5_1223700_C_T	74	29			103		CCLE_WGS	0.718447		2.55172
1240	ACH-000537	SNU761_LIVER	Liver	chr5	1216673	1217060	SLC6A19	5_1216775_A_G	36	157			193		CCLE_WES	0.186528		0.229299
1241	ACH-000538	HUTU80_SMALL_INTESTINE	Gastric	chr5	1221816	1225232	SLC6A19	5_1223772_T_C	39	34			73		CCLE_WGS	0.534247		1.14706
1242	ACH-000540	HS606T_FIBROBLAST	Fibroblast	chr5	1208861	1209001	SLC6A19	5_1208964_T_C	20	22			42		CCLE_WES	0.47619		0.909091
1243	ACH-000540	HS606T_FIBROBLAST	Fibroblast	chr5	1213578	1213688	SLC6A19	5_1213668_G_A	13	17			30		CCLE_WES	0.433333		0.764706
1244	ACH-000540	HS606T_FIBROBLAST	Fibroblast	chr5	1216673	1217060	SLC6A19	5_1216900_G_A	22	38			60		CCLE_WES	0.366667		0.578947
1245	ACH-000541	KMS34_HAEMATOPOIETIC_AND_LYMPHOID_TISSUE	Plasma cell	chr5	1216673	1217060	SLC6A19	5_1216775_A_G	38	39			77		CCLE_WES	0.493506		0.974359
1246	ACH-000541	KMS34_HAEMATOPOIETIC_AND_LYMPHOID_TISSUE	Plasma cell	chr5	1208861	1209001	SLC6A19	5_1208964_T_C	32	28			60		CCLE_WES	0.533333		1.14286
1247	ACH-000541	KMS34_HAEMATOPOIETIC_AND_LYMPHOID_TISSUE	Plasma cell	chr5	1216673	1217060	SLC6A19	5_1216900_G_A	65	50			115		CCLE_WES	0.565217		1.3
1248	ACH-000541	KMS34_HAEMATOPOIETIC_AND_LYMPHOID_TISSUE	Plasma cell	chr5	1201710	1201967	SLC6A19	5_1201806_G_A	17	13			30		CCLE_WES	0.566667		1.30769
1249	ACH-000542	HEYA8_OVARY	Ovary	chr5	1216673	1217060	SLC6A19	5_1216900_G_A	27	26			53		CCLE_WES	0.509434		1.03846
1250	ACH-000542	HEYA8_OVARY	Ovary	chr5	1208861	1209001	SLC6A19	5_1208964_T_C	10	20			30		CCLE_WES	0.333333		0.5
1251	ACH-000543	SNU489_CENTRAL_NERVOUS_SYSTEM	Central nervous system	chr5	1212418	1212599	SLC6A19	5_1212494_C_T	81	92			173		CCLE_WES	0.468208		0.880435
1252	ACH-000546	HSC4_UPPER_AERODIGESTIVE_TRACT	Upper aerodigestive	chr5	1216673	1217060	SLC6A19	5_1216775_A_G	27	41			68		CCLE_WES	0.397059		0.658537
1253	ACH-000549	SNU1076_UPPER_AERODIGESTIVE_TRACT	Upper aerodigestive	chr5	1216673	1217060	SLC6A19	5_1216900_G_A	37	40			77		CCLE_WES	0.480519		0.925
1254	ACH-000550	IGR39_SKIN	Skin	chr5	1221816	1225232	SLC6A19	5_1224405_A_G	37	44			81		CCLE_WGS	0.45679		0.840909
1255	ACH-000550	IGR39_SKIN	Skin	chr5	1221816	1225232	SLC6A19	5_1224174_T_C	32	34			66		CCLE_WGS	0.484848		0.941176
1256	ACH-000550	IGR39_SKIN	Skin	chr5	1221816	1225232	SLC6A19	5_1224083_C_A	24	24			48		CCLE_WGS	0.5		1
1257	ACH-000550	IGR39_SKIN	Skin	chr5	1221816	1225232	SLC6A19	5_1224001_T_C	22	22			44		CCLE_WGS	0.5		1
1258	ACH-000550	IGR39_SKIN	Skin	chr5	1221816	1225232	SLC6A19	5_1223845_A_G	24	24			48		CCLE_WGS	0.5		1
1259	ACH-000550	IGR39_SKIN	Skin	chr5	1221816	1225232	SLC6A19	5_1223772_T_C	60	43			103		CCLE_WGS	0.582524		1.39535
1260	ACH-000550	IGR39_SKIN	Skin	chr5	1221816	1225232	SLC6A19	5_1223062_G_T	21	32			53		CCLE_WGS	0.396226		0.65625
1261	ACH-000550	IGR39_SKIN	Skin	chr5	1221816	1225232	SLC6A19	5_1222622_G_A	33	31			64		CCLE_WGS	0.515625		1.06452
1262	ACH-000550	IGR39_SKIN	Skin	chr5	1221816	1225232	SLC6A19	5_1222499_T_C	43	29			72		CCLE_WGS	0.597222		1.48276
1263	ACH-000550	IGR39_SKIN	Skin	chr5	1216673	1217060	SLC6A19	5_1216900_G_A	33	31			64		CCLE_WGS	0.515625		1.06452
1264	ACH-000550	IGR39_SKIN	Skin	chr5	1213578	1213688	SLC6A19	5_1213668_G_A	28	30			58		CCLE_WGS	0.482759		0.933333
1265	ACH-000550	IGR39_SKIN	Skin	chr5	1221816	1225232	SLC6A19	5_1224285_G_A	22	37			59		CCLE_WGS	0.372881		0.594595
1266	ACH-000551	K562_HAEMATOPOIETIC_AND_LYMPHOID_TISSUE	Blood	chr5	1208861	1209001	SLC6A19	5_1208964_T_C	25	28			53		CCLE_WES	0.471698		0.892857
1267	ACH-000552	HT29_LARGE_INTESTINE	Colorectal	chr5	1221816	1225232	SLC6A19	5_1224405_A_G	45	43			88		CCLE_WGS	0.511364		1.04651
1268	ACH-000552	HT29_LARGE_INTESTINE	Colorectal	chr5	1221816	1225232	SLC6A19	5_1225121_C_T	27	24			51		CCLE_WGS	0.529412		1.125
1269	ACH-000552	HT29_LARGE_INTESTINE	Colorectal	chr5	1221816	1225232	SLC6A19	5_1223730_G_A	57	53			110		CCLE_WGS	0.518182		1.07547
1270	ACH-000552	HT29_LARGE_INTESTINE	Colorectal	chr5	1221816	1225232	SLC6A19	5_1223772_T_C	92	22			114		CCLE_WGS	0.807018		4.18182
1271	ACH-000552	HT29_LARGE_INTESTINE	Colorectal	chr5	1221816	1225232	SLC6A19	5_1223835_T_C	45	37			82		CCLE_WGS	0.54878		1.21622
1272	ACH-000552	HT29_LARGE_INTESTINE	Colorectal	chr5	1221816	1225232	SLC6A19	5_1223062_G_T	27	30			57		CCLE_WGS	0.473684		0.9
1273	ACH-000552	HT29_LARGE_INTESTINE	Colorectal	chr5	1221816	1225232	SLC6A19	5_1224003_C_T	31	16			47		CCLE_WGS	0.659574		1.9375
1274	ACH-000552	HT29_LARGE_INTESTINE	Colorectal	chr5	1221816	1225232	SLC6A19	5_1224083_C_A	35	35			70		CCLE_WGS	0.5		1
1275	ACH-000552	HT29_LARGE_INTESTINE	Colorectal	chr5	1221816	1225232	SLC6A19	5_1224285_G_A	41	32			73		CCLE_WGS	0.561644		1.28125
1276	ACH-000552	HT29_LARGE_INTESTINE	Colorectal	chr5	1221816	1225232	SLC6A19	5_1223940_A_G	31	29			60		CCLE_WGS	0.516667		1.06897
1277	ACH-000552	HT29_LARGE_INTESTINE	Colorectal	chr5	1221816	1225232	SLC6A19	5_1224174_T_C	48	36			84		CCLE_WGS	0.571429		1.33333
1278	ACH-000553	SQ1_LUNG	Lung	chr5	1208861	1209001	SLC6A19	5_1208964_T_C	28	18			46		CCLE_WES	0.608696		1.55556
1279	ACH-000554	UACC893_BREAST	Breast	chr5	1221816	1225232	SLC6A19	5_1222672_T_C	44	14			58		CCLE_WGS	0.758621		3.14286
1280	ACH-000554	UACC893_BREAST	Breast	chr5	1221816	1225232	SLC6A19	5_1223700_C_T	34	9			43		CCLE_WGS	0.790698		3.77778
1281	ACH-000554	UACC893_BREAST	Breast	chr5	1221816	1225232	SLC6A19	5_1223772_T_C	25	22			47		CCLE_WGS	0.531915		1.13636
1282	ACH-000554	UACC893_BREAST	Breast	chr5	1221816	1225232	SLC6A19	5_1223940_A_G	29	8			37		CCLE_WGS	0.783784		3.625
1283	ACH-000554	UACC893_BREAST	Breast	chr5	1221816	1225232	SLC6A19	5_1224174_T_C	8	15			23		CCLE_WGS	0.347826		0.533333
1284	ACH-000554	UACC893_BREAST	Breast	chr5	1221816	1225232	SLC6A19	5_1224405_A_G	10	14			24		CCLE_WGS	0.416667		0.714286
1285	ACH-000554	UACC893_BREAST	Breast	chr5	1221816	1225232	SLC6A19	5_1225121_C_T	23	11			34		CCLE_WGS	0.676471		2.09091
1286	ACH-000559	NCIH1836_LUNG	Lung	chr5	1213578	1213688	SLC6A19	5_1213668_G_A	26	31			57		CCLE_WES	0.45614		0.83871
1287	ACH-000559	NCIH1836_LUNG	Lung	chr5	1221816	1225232	SLC6A19	5_1222798_G_A	29	46			75		CCLE_WGS	0.386667		0.630435
1288	ACH-000559	NCIH1836_LUNG	Lung	chr5	1213578	1213688	SLC6A19	5_1213668_G_A	17	30			47		CCLE_WGS	0.361702		0.566667
1289	ACH-000559	NCIH1836_LUNG	Lung	chr5	1221816	1225232	SLC6A19	5_1223730_G_A	104	38			142		CCLE_WGS	0.732394		2.73684
1290	ACH-000559	NCIH1836_LUNG	Lung	chr5	1221816	1225232	SLC6A19	5_1223940_A_G	37	22			59		CCLE_WGS	0.627119		1.68182
1291	ACH-000559	NCIH1836_LUNG	Lung	chr5	1221816	1225232	SLC6A19	5_1223772_T_C	90	63			153		CCLE_WGS	0.588235		1.42857
1292	ACH-000559	NCIH1836_LUNG	Lung	chr5	1208861	1209001	SLC6A19	5_1208964_T_C	26	31			57		CCLE_WES	0.45614		0.83871
1293	ACH-000559	NCIH1836_LUNG	Lung	chr5	1221816	1225232	SLC6A19	5_1223835_T_C	44	34			78		CCLE_WGS	0.564103		1.29412
1294	ACH-000559	NCIH1836_LUNG	Lung	chr5	1221816	1225232	SLC6A19	5_1223062_G_T	26	43			69		CCLE_WGS	0.376812		0.604651
1295	ACH-000559	NCIH1836_LUNG	Lung	chr5	1221816	1225232	SLC6A19	5_1225121_C_T	46	27			73		CCLE_WGS	0.630137		1.7037
1296	ACH-000559	NCIH1836_LUNG	Lung	chr5	1221816	1225232	SLC6A19	5_1224405_A_G	32	42			74		CCLE_WGS	0.432432		0.761905
1297	ACH-000559	NCIH1836_LUNG	Lung	chr5	1221816	1225232	SLC6A19	5_1224285_G_A	27	35			62		CCLE_WGS	0.435484		0.771429
1298	ACH-000559	NCIH1836_LUNG	Lung	chr5	1221816	1225232	SLC6A19	5_1224174_T_C	20	37			57		CCLE_WGS	0.350877		0.540541
1299	ACH-000559	NCIH1836_LUNG	Lung	chr5	1221816	1225232	SLC6A19	5_1224083_C_A	33	36			69		CCLE_WGS	0.478261		0.916667
1300	ACH-000559	NCIH1836_LUNG	Lung	chr5	1221816	1225232	SLC6A19	5_1224003_C_T	33	10			43		CCLE_WGS	0.767442		3.3
1301	ACH-000559	NCIH1836_LUNG	Lung	chr5	1208861	1209001	SLC6A19	5_1208964_T_C	20	19			39		CCLE_WGS	0.512821		1.05263
1302	ACH-000561	TT_OESOPHAGUS	Esophagus	chr5	1216673	1217060	SLC6A19	5_1216867_G_A	67	20			87		CCLE_WES	0.770115		3.35
1303	ACH-000562	HCC78_LUNG	Lung	chr5	1208861	1209001	SLC6A19	5_1208964_T_C	27	19			46		CCLE_WES	0.586957		1.42105
1304	ACH-000562	HCC78_LUNG	Lung	chr5	1213578	1213688	SLC6A19	5_1213668_G_A	24	13			37		CCLE_WES	0.648649		1.84615
1305	ACH-000562	HCC78_LUNG	Lung	chr5	1216673	1217060	SLC6A19	5_1216900_G_A	42	54			96		CCLE_WES	0.4375		0.777778
1306	ACH-000564	KHM1B_HAEMATOPOIETIC_AND_LYMPHOID_TISSUE	Plasma cell	chr5	1216673	1217060	SLC6A19	5_1216775_A_G	53	25			78		CCLE_WES	0.679487		2.12
1307	ACH-000568	UACC812_BREAST	Breast	chr5	1221816	1225232	SLC6A19	5_1223772_T_C	21	18			39		CCLE_WGS	0.538462		1.16667
1308	ACH-000572	G361_SKIN	Skin	chr5	1221816	1225232	SLC6A19	5_1223874_A_G	18	10			28		CCLE_WGS	0.642857		1.8
1309	ACH-000572	G361_SKIN	Skin	chr5	1221816	1225232	SLC6A19	5_1222480_C_T	24	31			55		CCLE_WGS	0.436364		0.774194
1310	ACH-000572	G361_SKIN	Skin	chr5	1221816	1225232	SLC6A19	5_1222667_G_A	27	33			60		CCLE_WGS	0.45		0.818182
1311	ACH-000572	G361_SKIN	Skin	chr5	1216673	1217060	SLC6A19	5_1216900_G_A	24	36			60		CCLE_WGS	0.4		0.666667
1312	ACH-000572	G361_SKIN	Skin	chr5	1221816	1225232	SLC6A19	5_1224795_G_C	25	30			55		CCLE_WGS	0.454545		0.833333
1313	ACH-000572	G361_SKIN	Skin	chr5	1221816	1225232	SLC6A19	5_1225121_C_T	25	23			48		CCLE_WGS	0.520833		1.08696
1314	ACH-000572	G361_SKIN	Skin	chr5	1221816	1225232	SLC6A19	5_1222672_T_C	29	27			56		CCLE_WGS	0.517857		1.07407
1315	ACH-000572	G361_SKIN	Skin	chr5	1221816	1225232	SLC6A19	5_1222896_C_T	23	31			54		CCLE_WGS	0.425926		0.741935
1316	ACH-000572	G361_SKIN	Skin	chr5	1221816	1225232	SLC6A19	5_1224003_C_T	28	8			36		CCLE_WGS	0.777778		3.5
1317	ACH-000572	G361_SKIN	Skin	chr5	1221816	1225232	SLC6A19	5_1223940_A_G	26	16			42		CCLE_WGS	0.619048		1.625
1318	ACH-000572	G361_SKIN	Skin	chr5	1221816	1225232	SLC6A19	5_1224405_A_G	33	26			59		CCLE_WGS	0.559322		1.26923
1319	ACH-000572	G361_SKIN	Skin	chr5	1221816	1225232	SLC6A19	5_1223700_C_T	41	30			71		CCLE_WGS	0.577465		1.36667
1320	ACH-000573	MDAMB436_BREAST	Breast	chr5	1213578	1213688	SLC6A19	5_1213668_G_A	14	14			28		CCLE_WES	0.5		1
1321	ACH-000574	FUOV1_OVARY	Ovary	chr5	1213578	1213688	SLC6A19	5_1213668_G_A	17	9			26		CCLE_WGS	0.653846		1.88889
1322	ACH-000574	FUOV1_OVARY	Ovary	chr5	1221816	1225232	SLC6A19	5_1223700_C_T	21	16			37		CCLE_WGS	0.567568		1.3125
1323	ACH-000576	KMS27_HAEMATOPOIETIC_AND_LYMPHOID_TISSUE	Plasma cell	chr5	1216673	1217060	SLC6A19	5_1216775_A_G	64	29			93		CCLE_WES	0.688172		2.2069
1324	ACH-000579	UACC257_SKIN	Skin	chr5	1221816	1225232	SLC6A19	5_1222798_G_A	23	14			37		CCLE_WGS	0.621622		1.64286
1325	ACH-000579	UACC257_SKIN	Skin	chr5	1221816	1225232	SLC6A19	5_1223772_T_C	35	48			83		CCLE_WGS	0.421687		0.729167
1326	ACH-000579	UACC257_SKIN	Skin	chr5	1213578	1213688	SLC6A19	5_1213668_G_A	22	11			33		CCLE_WGS	0.666667		2
1327	ACH-000581	SNU16_STOMACH	Gastric	chr5	1221816	1225232	SLC6A19	5_1224490_G_T	14	8			22		CCLE_WGS	0.636364		1.75
1328	ACH-000581	SNU16_STOMACH	Gastric	chr5	1221816	1225232	SLC6A19	5_1225121_C_T	10	16			26		CCLE_WGS	0.384615		0.625
1329	ACH-000581	SNU16_STOMACH	Gastric	chr5	1201710	1201967	SLC6A19	5_1201806_G_A	8	19			27		CCLE_WGS	0.296296		0.421053
1330	ACH-000581	SNU16_STOMACH	Gastric	chr5	1221816	1225232	SLC6A19	5_1223835_T_C	17	14			31		CCLE_WGS	0.548387		1.21429
1331	ACH-000581	SNU16_STOMACH	Gastric	chr5	1221816	1225232	SLC6A19	5_1223940_A_G	12	8			20		CCLE_WGS	0.6		1.5
1332	ACH-000581	SNU16_STOMACH	Gastric	chr5	1216673	1217060	SLC6A19	5_1216775_A_G	14	10			24		CCLE_WGS	0.583333		1.4
1333	ACH-000581	SNU16_STOMACH	Gastric	chr5	1221816	1225232	SLC6A19	5_1223730_G_A	18	12			30		CCLE_WGS	0.6		1.5
1334	ACH-000582	COLO741_SKIN	Skin	chr5	1221816	1225232	SLC6A19	5_1223062_G_T	33	33			66		CCLE_WGS	0.5		1
1335	ACH-000582	COLO741_SKIN	Skin	chr5	1221816	1225232	SLC6A19	5_1222756_G_C	20	30			50		CCLE_WGS	0.4		0.666667
1336	ACH-000582	COLO741_SKIN	Skin	chr5	1221816	1225232	SLC6A19	5_1223730_G_A	32	25			57		CCLE_WGS	0.561404		1.28
1337	ACH-000582	COLO741_SKIN	Skin	chr5	1221816	1225232	SLC6A19	5_1224405_A_G	28	25			53		CCLE_WGS	0.528302		1.12
1338	ACH-000582	COLO741_SKIN	Skin	chr5	1221816	1225232	SLC6A19	5_1223835_T_C	24	23			47		CCLE_WGS	0.510638		1.04348
1339	ACH-000582	COLO741_SKIN	Skin	chr5	1221816	1225232	SLC6A19	5_1223940_A_G	24	28			52		CCLE_WGS	0.461538		0.857143
1340	ACH-000582	COLO741_SKIN	Skin	chr5	1221816	1225232	SLC6A19	5_1224083_C_A	20	25			45		CCLE_WGS	0.444444		0.8
1341	ACH-000582	COLO741_SKIN	Skin	chr5	1221816	1225232	SLC6A19	5_1224174_T_C	25	29			54		CCLE_WGS	0.462963		0.862069
1342	ACH-000582	COLO741_SKIN	Skin	chr5	1221816	1225232	SLC6A19	5_1224285_G_A	25	21			46		CCLE_WGS	0.543478		1.19048
1343	ACH-000582	COLO741_SKIN	Skin	chr5	1221816	1225232	SLC6A19	5_1225121_C_T	30	28			58		CCLE_WGS	0.517241		1.07143
1344	ACH-000582	COLO741_SKIN	Skin	chr5	1221816	1225232	SLC6A19	5_1223772_T_C	51	13			64		CCLE_WGS	0.796875		3.92308
1345	ACH-000586	NCIH1876_LUNG	Lung	chr5	1221816	1225232	SLC6A19	5_1224285_G_A	37	14			51		CCLE_WGS	0.72549		2.64286
1346	ACH-000586	NCIH1876_LUNG	Lung	chr5	1221816	1225232	SLC6A19	5_1224405_A_G	28	13			41		CCLE_WGS	0.682927		2.15385
1347	ACH-000586	NCIH1876_LUNG	Lung	chr5	1221816	1225232	SLC6A19	5_1225121_C_T	12	22			34		CCLE_WGS	0.352941		0.545455
1348	ACH-000586	NCIH1876_LUNG	Lung	chr5	1221816	1225232	SLC6A19	5_1224003_C_T	16	16			32		CCLE_WGS	0.5		1
1349	ACH-000586	NCIH1876_LUNG	Lung	chr5	1221816	1225232	SLC6A19	5_1224174_T_C	33	14			47		CCLE_WGS	0.702128		2.35714
1350	ACH-000586	NCIH1876_LUNG	Lung	chr5	1216673	1217060	SLC6A19	5_1216869_C_G	32	22			54		CCLE_WGS	0.592593		1.45455
1351	ACH-000586	NCIH1876_LUNG	Lung	chr5	1221816	1225232	SLC6A19	5_1221835_A_T	13	20			33		CCLE_WGS	0.393939		0.65
1352	ACH-000586	NCIH1876_LUNG	Lung	chr5	1221816	1225232	SLC6A19	5_1223062_G_T	30	20			50		CCLE_WGS	0.6		1.5
1353	ACH-000586	NCIH1876_LUNG	Lung	chr5	1221816	1225232	SLC6A19	5_1223730_G_A	39	26			65		CCLE_WGS	0.6		1.5
1354	ACH-000586	NCIH1876_LUNG	Lung	chr5	1208861	1209001	SLC6A19	5_1208964_T_C	15	8			23		CCLE_WGS	0.652174		1.875
1355	ACH-000586	NCIH1876_LUNG	Lung	chr5	1221816	1225232	SLC6A19	5_1223835_T_C	14	34			48		CCLE_WGS	0.291667		0.411765
1356	ACH-000586	NCIH1876_LUNG	Lung	chr5	1221816	1225232	SLC6A19	5_1223772_T_C	48	23			71		CCLE_WGS	0.676056		2.08696
1357	ACH-000586	NCIH1876_LUNG	Lung	chr5	1221816	1225232	SLC6A19	5_1224083_C_A	25	14			39		CCLE_WGS	0.641026		1.78571
1358	ACH-000586	NCIH1876_LUNG	Lung	chr5	1221816	1225232	SLC6A19	5_1223940_A_G	19	28			47		CCLE_WGS	0.404255		0.678571
1359	ACH-000587	NCIH1975_LUNG	Lung	chr5	1221816	1225232	SLC6A19	5_1223772_T_C	56	25			81		CCLE_WGS	0.691358		2.24
1360	ACH-000587	NCIH1975_LUNG	Lung	chr5	1221816	1225232	SLC6A19	5_1223062_G_T	17	33			50		CCLE_WGS	0.34		0.515152
1361	ACH-000587	NCIH1975_LUNG	Lung	chr5	1221816	1225232	SLC6A19	5_1222499_T_C	37	13			50		CCLE_WGS	0.74		2.84615
1362	ACH-000587	NCIH1975_LUNG	Lung	chr5	1221816	1225232	SLC6A19	5_1223845_A_G	21	21			42		CCLE_WGS	0.5		1
1363	ACH-000587	NCIH1975_LUNG	Lung	chr5	1221816	1225232	SLC6A19	5_1224083_C_A	16	25			41		CCLE_WGS	0.390244		0.64
1364	ACH-000587	NCIH1975_LUNG	Lung	chr5	1221816	1225232	SLC6A19	5_1224174_T_C	17	26			43		CCLE_WGS	0.395349		0.653846
1365	ACH-000587	NCIH1975_LUNG	Lung	chr5	1216673	1217060	SLC6A19	5_1216900_G_A	31	14			45		CCLE_WGS	0.688889		2.21429
1366	ACH-000587	NCIH1975_LUNG	Lung	chr5	1221816	1225232	SLC6A19	5_1224285_G_A	10	19			29		CCLE_WGS	0.344828		0.526316
1367	ACH-000587	NCIH1975_LUNG	Lung	chr5	1208861	1209001	SLC6A19	5_1208964_T_C	16	15			31		CCLE_WGS	0.516129		1.06667
1368	ACH-000587	NCIH1975_LUNG	Lung	chr5	1221816	1225232	SLC6A19	5_1224405_A_G	14	32			46		CCLE_WGS	0.304348		0.4375
1369	ACH-000587	NCIH1975_LUNG	Lung	chr5	1221816	1225232	SLC6A19	5_1224001_T_C	12	24			36		CCLE_WGS	0.333333		0.5
1370	ACH-000588	KMS26_HAEMATOPOIETIC_AND_LYMPHOID_TISSUE	Plasma cell	chr5	1208861	1209001	SLC6A19	5_1208964_T_C	34	17			51		CCLE_WES	0.666667		2
1371	ACH-000590	NCIH2073_LUNG	Lung	chr5	1208861	1209001	SLC6A19	5_1208964_T_C	78	20			98		CCLE_WES	0.795918		3.9
1372	ACH-000594	DMS153_LUNG	Lung	chr5	1221816	1225232	SLC6A19	5_1223700_C_T	51	19			70		CCLE_WGS	0.728571		2.68421
1373	ACH-000594	DMS153_LUNG	Lung	chr5	1221816	1225232	SLC6A19	5_1223730_G_A	9	53			62		CCLE_WGS	0.145161		0.169811
1374	ACH-000595	LN229_CENTRAL_NERVOUS_SYSTEM	Central nervous system	chr5	1221816	1225232	SLC6A19	5_1225043_C_T	23	11			34		CCLE_WGS	0.676471		2.09091
1375	ACH-000595	LN229_CENTRAL_NERVOUS_SYSTEM	Central nervous system	chr5	1221816	1225232	SLC6A19	5_1223772_T_C	50	49			99		CCLE_WGS	0.505051		1.02041
1376	ACH-000598	KMS21BM_HAEMATOPOIETIC_AND_LYMPHOID_TISSUE	Plasma cell	chr5	1213578	1213688	SLC6A19	5_1213668_G_A	23	39			62		CCLE_WES	0.370968		0.589744
1377	ACH-000598	KMS21BM_HAEMATOPOIETIC_AND_LYMPHOID_TISSUE	Plasma cell	chr5	1216673	1217060	SLC6A19	5_1216775_A_G	49	38			87		CCLE_WES	0.563218		1.28947
1378	ACH-000598	KMS21BM_HAEMATOPOIETIC_AND_LYMPHOID_TISSUE	Plasma cell	chr5	1208861	1209001	SLC6A19	5_1208964_T_C	20	20			40		CCLE_WES	0.5		1
1379	ACH-000598	KMS21BM_HAEMATOPOIETIC_AND_LYMPHOID_TISSUE	Plasma cell	chr5	1216673	1217060	SLC6A19	5_1216900_G_A	50	39			89		CCLE_WES	0.561798		1.28205
1380	ACH-000599	PATU8902_PANCREAS	Pancreas	chr5	1208861	1209001	SLC6A19	5_1208964_T_C	24	31			55		CCLE_WES	0.436364		0.774194
1381	ACH-000601	MIAPACA2_PANCREAS	Pancreas	chr5	1221816	1225232	SLC6A19	5_1223700_C_T	38	8			46		CCLE_WGS	0.826087		4.75
1382	ACH-000601	MIAPACA2_PANCREAS	Pancreas	chr5	1221816	1225232	SLC6A19	5_1223940_A_G	32	9			41		CCLE_WGS	0.780488		3.55556
1383	ACH-000601	MIAPACA2_PANCREAS	Pancreas	chr5	1221816	1225232	SLC6A19	5_1224051_C_T	30	15			45		CCLE_WGS	0.666667		2
1384	ACH-000601	MIAPACA2_PANCREAS	Pancreas	chr5	1221816	1225232	SLC6A19	5_1224490_G_T	49	16			65		CCLE_WGS	0.753846		3.0625
1385	ACH-000601	MIAPACA2_PANCREAS	Pancreas	chr5	1221816	1225232	SLC6A19	5_1224795_G_C	50	13			63		CCLE_WGS	0.793651		3.84615
1386	ACH-000601	MIAPACA2_PANCREAS	Pancreas	chr5	1221816	1225232	SLC6A19	5_1225121_C_T	35	24			59		CCLE_WGS	0.59322		1.45833
1387	ACH-000601	MIAPACA2_PANCREAS	Pancreas	chr5	1216673	1217060	SLC6A19	5_1216775_A_G	38	10			48		CCLE_WGS	0.791667		3.8
1388	ACH-000601	MIAPACA2_PANCREAS	Pancreas	chr5	1221816	1225232	SLC6A19	5_1223835_T_C	29	12			41		CCLE_WGS	0.707317		2.41667
1389	ACH-000602	M07E_HAEMATOPOIETIC_AND_LYMPHOID_TISSUE	Blood	chr5	1208861	1209001	SLC6A19	5_1208964_T_C	38	15	4	17	53	21	CCLE_WES	0.716981	0.190476	2.53333	0.235294	0.0928793	0.103525	1
1390	ACH-000604	KYO1_HAEMATOPOIETIC_AND_LYMPHOID_TISSUE	Blood	chr5	1216673	1217060	SLC6A19	5_1216900_G_A	35	61	9	40	96	49	CCLE_WES	0.364583	0.183673	0.57377	0.225	0.392143	0.406364	0
1391	ACH-000604	KYO1_HAEMATOPOIETIC_AND_LYMPHOID_TISSUE	Blood	chr5	1216673	1217060	SLC6A19	5_1216775_A_G	33	43	276	574	76	850	CCLE_WES	0.434211	0.324706	0.767442	0.480836	0.626544	0.624956	0
1392	ACH-000607	KYM1_SOFT_TISSUE	Soft tissue	chr5	1221816	1225232	SLC6A19	5_1224003_C_T	17	19			36		CCLE_WGS	0.472222		0.894737
1393	ACH-000607	KYM1_SOFT_TISSUE	Soft tissue	chr5	1221816	1225232	SLC6A19	5_1223940_A_G	13	13			26		CCLE_WGS	0.5		1
1394	ACH-000607	KYM1_SOFT_TISSUE	Soft tissue	chr5	1221816	1225232	SLC6A19	5_1223835_T_C	17	19			36		CCLE_WGS	0.472222		0.894737
1395	ACH-000607	KYM1_SOFT_TISSUE	Soft tissue	chr5	1221816	1225232	SLC6A19	5_1223772_T_C	32	28			60		CCLE_WGS	0.533333		1.14286
1396	ACH-000607	KYM1_SOFT_TISSUE	Soft tissue	chr5	1221816	1225232	SLC6A19	5_1223730_G_A	45	18			63		CCLE_WGS	0.714286		2.5
1397	ACH-000607	KYM1_SOFT_TISSUE	Soft tissue	chr5	1221816	1225232	SLC6A19	5_1223062_G_T	20	24			44		CCLE_WGS	0.454545		0.833333
1398	ACH-000607	KYM1_SOFT_TISSUE	Soft tissue	chr5	1216673	1217060	SLC6A19	5_1216900_G_A	19	20			39		CCLE_WGS	0.487179		0.95
1399	ACH-000607	KYM1_SOFT_TISSUE	Soft tissue	chr5	1208861	1209001	SLC6A19	5_1208964_T_C	14	10			24		CCLE_WGS	0.583333		1.4
1400	ACH-000607	KYM1_SOFT_TISSUE	Soft tissue	chr5	1221816	1225232	SLC6A19	5_1224174_T_C	22	14			36		CCLE_WGS	0.611111		1.57143
1401	ACH-000607	KYM1_SOFT_TISSUE	Soft tissue	chr5	1221816	1225232	SLC6A19	5_1224285_G_A	18	18			36		CCLE_WGS	0.5		1
1402	ACH-000607	KYM1_SOFT_TISSUE	Soft tissue	chr5	1221816	1225232	SLC6A19	5_1224405_A_G	26	23			49		CCLE_WGS	0.530612		1.13043
1403	ACH-000607	KYM1_SOFT_TISSUE	Soft tissue	chr5	1221816	1225232	SLC6A19	5_1225121_C_T	14	8			22		CCLE_WGS	0.636364		1.75
1404	ACH-000608	COV644_OVARY	Ovary	chr5	1221816	1225232	SLC6A19	5_1223772_T_C	55	30	9	10	85	19	CCLE_WGS	0.647059	0.473684	1.83333	0.9	0.490909	0.497211	0
1405	ACH-000608	COV644_OVARY	Ovary	chr5	1221816	1225232	SLC6A19	5_1223802_G_A	53	13	12	2	66	14	CCLE_WGS	0.80303	0.857143	4.07692	6	1.4717	1.26168	0
1406	ACH-000608	COV644_OVARY	Ovary	chr5	1221816	1225232	SLC6A19	5_1224795_G_C	19	41			60		CCLE_WGS	0.316667		0.463415
1407	ACH-000608	COV644_OVARY	Ovary	chr5	1221816	1225232	SLC6A19	5_1224490_G_T	23	42			65		CCLE_WGS	0.353846		0.547619
1408	ACH-000608	COV644_OVARY	Ovary	chr5	1221816	1225232	SLC6A19	5_1224405_A_G	15	39			54		CCLE_WGS	0.277778		0.384615
1409	ACH-000608	COV644_OVARY	Ovary	chr5	1221816	1225232	SLC6A19	5_1224285_G_A	16	33			49		CCLE_WGS	0.326531		0.484848
1410	ACH-000608	COV644_OVARY	Ovary	chr5	1221816	1225232	SLC6A19	5_1223062_G_T	12	39	6	8	51	14	CCLE_WGS	0.235294	0.428571	0.307692	0.75	2.4375	2.41647	0
1411	ACH-000608	COV644_OVARY	Ovary	chr5	1221816	1225232	SLC6A19	5_1224051_C_T	14	34	1	9	48	10	CCLE_WGS	0.291667	0.1	0.411765	0.111111	0.269841	0.375681	0
1412	ACH-000608	COV644_OVARY	Ovary	chr5	1221816	1225232	SLC6A19	5_1224083_C_A	12	41			53		CCLE_WGS	0.226415		0.292683
1413	ACH-000608	COV644_OVARY	Ovary	chr5	1221816	1225232	SLC6A19	5_1224174_T_C	18	52			70		CCLE_WGS	0.257143		0.346154
1414	ACH-000608	COV644_OVARY	Ovary	chr5	1216673	1217060	SLC6A19	5_1216775_A_G	14	32	2	6	46	8	CCLE_WGS	0.304348	0.25	0.4375	0.333333	0.761905	0.862069	0
1415	ACH-000610	NCIH2227_LUNG	Lung	chr5	1221816	1225232	SLC6A19	5_1224285_G_A	38	33			71		CCLE_WGS	0.535211		1.15152
1416	ACH-000610	NCIH2227_LUNG	Lung	chr5	1221816	1225232	SLC6A19	5_1223062_G_T	33	31			64		CCLE_WGS	0.515625		1.06452
1417	ACH-000610	NCIH2227_LUNG	Lung	chr5	1221816	1225232	SLC6A19	5_1223940_A_G	28	24			52		CCLE_WGS	0.538462		1.16667
1418	ACH-000610	NCIH2227_LUNG	Lung	chr5	1221816	1225232	SLC6A19	5_1223835_T_C	30	38			68		CCLE_WGS	0.441176		0.789474
1419	ACH-000610	NCIH2227_LUNG	Lung	chr5	1221816	1225232	SLC6A19	5_1224174_T_C	42	38			80		CCLE_WGS	0.525		1.10526
1420	ACH-000610	NCIH2227_LUNG	Lung	chr5	1221816	1225232	SLC6A19	5_1223772_T_C	57	29			86		CCLE_WGS	0.662791		1.96552
1421	ACH-000610	NCIH2227_LUNG	Lung	chr5	1221816	1225232	SLC6A19	5_1224083_C_A	33	30			63		CCLE_WGS	0.52381		1.1
1422	ACH-000610	NCIH2227_LUNG	Lung	chr5	1221816	1225232	SLC6A19	5_1224405_A_G	44	44			88		CCLE_WGS	0.5		1
1423	ACH-000610	NCIH2227_LUNG	Lung	chr5	1221816	1225232	SLC6A19	5_1225121_C_T	21	38			59		CCLE_WGS	0.355932		0.552632
1424	ACH-000610	NCIH2227_LUNG	Lung	chr5	1221816	1225232	SLC6A19	5_1224003_C_T	29	16			45		CCLE_WGS	0.644444		1.8125
1425	ACH-000610	NCIH2227_LUNG	Lung	chr5	1221816	1225232	SLC6A19	5_1223730_G_A	65	30			95		CCLE_WGS	0.684211		2.16667
1426	ACH-000611	SUDHL6_HAEMATOPOIETIC_AND_LYMPHOID_TISSUE	Lymphocyte	chr5	1216673	1217060	SLC6A19	5_1216900_G_A	82	81			163		CCLE_WES	0.503067		1.01235
1427	ACH-000614	RVH421_SKIN	Skin	chr5	1221816	1225232	SLC6A19	5_1224003_C_T	10	14			24		CCLE_WGS	0.416667		0.714286
1428	ACH-000614	RVH421_SKIN	Skin	chr5	1221816	1225232	SLC6A19	5_1223940_A_G	11	17			28		CCLE_WGS	0.392857		0.647059
1429	ACH-000614	RVH421_SKIN	Skin	chr5	1221816	1225232	SLC6A19	5_1223730_G_A	20	23			43		CCLE_WGS	0.465116		0.869565
1430	ACH-000614	RVH421_SKIN	Skin	chr5	1221816	1225232	SLC6A19	5_1223772_T_C	34	8			42		CCLE_WGS	0.809524		4.25
1431	ACH-000614	RVH421_SKIN	Skin	chr5	1221816	1225232	SLC6A19	5_1223835_T_C	19	21			40		CCLE_WGS	0.475		0.904762
1432	ACH-000614	RVH421_SKIN	Skin	chr5	1221816	1225232	SLC6A19	5_1224405_A_G	16	16			32		CCLE_WGS	0.5		1
1433	ACH-000614	RVH421_SKIN	Skin	chr5	1221816	1225232	SLC6A19	5_1224285_G_A	20	15			35		CCLE_WGS	0.571429		1.33333
1434	ACH-000614	RVH421_SKIN	Skin	chr5	1221816	1225232	SLC6A19	5_1224174_T_C	22	14			36		CCLE_WGS	0.611111		1.57143
1435	ACH-000614	RVH421_SKIN	Skin	chr5	1221816	1225232	SLC6A19	5_1225121_C_T	22	22			44		CCLE_WGS	0.5		1
1436	ACH-000614	RVH421_SKIN	Skin	chr5	1221816	1225232	SLC6A19	5_1223062_G_T	11	13			24		CCLE_WGS	0.458333		0.846154
1437	ACH-000614	RVH421_SKIN	Skin	chr5	1221816	1225232	SLC6A19	5_1224083_C_A	16	11			27		CCLE_WGS	0.592593		1.45455
1438	ACH-000614	RVH421_SKIN	Skin	chr5	1213578	1213688	SLC6A19	5_1213668_G_A	20	16			36		CCLE_WGS	0.555556		1.25
1439	ACH-000616	HS746T_STOMACH	Gastric	chr5	1221816	1225232	SLC6A19	5_1224405_A_G	23	28			51		CCLE_WGS	0.45098		0.821429
1440	ACH-000616	HS746T_STOMACH	Gastric	chr5	1221816	1225232	SLC6A19	5_1224285_G_A	14	21			35		CCLE_WGS	0.4		0.666667
1441	ACH-000616	HS746T_STOMACH	Gastric	chr5	1216673	1217060	SLC6A19	5_1216900_G_A	17	18			35		CCLE_WGS	0.485714		0.944444
1442	ACH-000616	HS746T_STOMACH	Gastric	chr5	1221816	1225232	SLC6A19	5_1222499_T_C	23	21			44		CCLE_WGS	0.522727		1.09524
1443	ACH-000616	HS746T_STOMACH	Gastric	chr5	1221816	1225232	SLC6A19	5_1223062_G_T	20	19			39		CCLE_WGS	0.512821		1.05263
1444	ACH-000616	HS746T_STOMACH	Gastric	chr5	1221816	1225232	SLC6A19	5_1223772_T_C	34	21			55		CCLE_WGS	0.618182		1.61905
1445	ACH-000616	HS746T_STOMACH	Gastric	chr5	1221816	1225232	SLC6A19	5_1223845_A_G	31	17			48		CCLE_WGS	0.645833		1.82353
1446	ACH-000616	HS746T_STOMACH	Gastric	chr5	1221816	1225232	SLC6A19	5_1224001_T_C	24	15			39		CCLE_WGS	0.615385		1.6
1447	ACH-000616	HS746T_STOMACH	Gastric	chr5	1221816	1225232	SLC6A19	5_1224083_C_A	21	17			38		CCLE_WGS	0.552632		1.23529
1448	ACH-000616	HS746T_STOMACH	Gastric	chr5	1221816	1225232	SLC6A19	5_1224174_T_C	27	31			58		CCLE_WGS	0.465517		0.870968
1449	ACH-000617	OVCAR4_OVARY	Ovary	chr5	1221816	1225232	SLC6A19	5_1223772_T_C	12	8			20		CCLE_WGS	0.6		1.5
1450	ACH-000618	SNU1041_UPPER_AERODIGESTIVE_TRACT	Upper aerodigestive	chr5	1216673	1217060	SLC6A19	5_1216775_A_G	84	32			116		CCLE_WES	0.724138		2.625
1451	ACH-000620	JHH1_LIVER	Liver	chr5	1208861	1209001	SLC6A19	5_1208964_T_C	14	10			24		CCLE_WGS	0.583333		1.4
1452	ACH-000623	SNU201_CENTRAL_NERVOUS_SYSTEM	Central nervous system	chr5	1216673	1217060	SLC6A19	5_1216775_A_G	43	51			94		CCLE_WES	0.457447		0.843137
1453	ACH-000625	HEP3B217_LIVER	Liver	chr5	1208861	1209001	SLC6A19	5_1208964_T_C	29	12	64	8	41	72	CCLE_WES	0.707317	0.888889	2.41667	8	3.31034	3.21535	0
1454	ACH-000625	HEP3B217_LIVER	Liver	chr5	1216673	1217060	SLC6A19	5_1216900_G_A	60	26			86		CCLE_WES	0.697674		2.30769
1455	ACH-000625	HEP3B217_LIVER	Liver	chr5	1216673	1217060	SLC6A19	5_1216751_C_T	34	23	138	19	57	157	CCLE_WES	0.596491	0.878981	1.47826	7.26316	4.91331	4.83798	0
1456	ACH-000625	HEP3B217_LIVER	Liver	chr5	1213578	1213688	SLC6A19	5_1213668_G_A	25	10	155	23	35	178	CCLE_WES	0.714286	0.870787	2.5	6.73913	2.69565	2.72466	0
1457	ACH-000628	NCIH596_LUNG	Lung	chr5	1221266	1221428	SLC6A19	5_1221396_G_A	38	8			46		CCLE_WGS	0.826087		4.75
1458	ACH-000628	NCIH596_LUNG	Lung	chr5	1221816	1225232	SLC6A19	5_1224083_C_A	27	45			72		CCLE_WGS	0.375		0.6
1459	ACH-000628	NCIH596_LUNG	Lung	chr5	1221816	1225232	SLC6A19	5_1224405_A_G	28	45			73		CCLE_WGS	0.383562		0.622222
1460	ACH-000628	NCIH596_LUNG	Lung	chr5	1221816	1225232	SLC6A19	5_1224003_C_T	27	13			40		CCLE_WGS	0.675		2.07692
1461	ACH-000628	NCIH596_LUNG	Lung	chr5	1221816	1225232	SLC6A19	5_1224285_G_A	23	25			48		CCLE_WGS	0.479167		0.92
1462	ACH-000628	NCIH596_LUNG	Lung	chr5	1221816	1225232	SLC6A19	5_1224174_T_C	32	44			76		CCLE_WGS	0.421053		0.727273
1463	ACH-000628	NCIH596_LUNG	Lung	chr5	1221816	1225232	SLC6A19	5_1223062_G_T	14	34			48		CCLE_WGS	0.291667		0.411765
1464	ACH-000628	NCIH596_LUNG	Lung	chr5	1221816	1225232	SLC6A19	5_1223730_G_A	59	22			81		CCLE_WGS	0.728395		2.68182
1465	ACH-000628	NCIH596_LUNG	Lung	chr5	1221816	1225232	SLC6A19	5_1223772_T_C	53	24			77		CCLE_WGS	0.688312		2.20833
1466	ACH-000628	NCIH596_LUNG	Lung	chr5	1221816	1225232	SLC6A19	5_1223835_T_C	37	33			70		CCLE_WGS	0.528571		1.12121
1467	ACH-000628	NCIH596_LUNG	Lung	chr5	1221816	1225232	SLC6A19	5_1223940_A_G	35	21			56		CCLE_WGS	0.625		1.66667
1468	ACH-000628	NCIH596_LUNG	Lung	chr5	1221816	1225232	SLC6A19	5_1225121_C_T	46	27			73		CCLE_WGS	0.630137		1.7037
1469	ACH-000630	YD8_UPPER_AERODIGESTIVE_TRACT	Upper aerodigestive	chr5	1213578	1213688	SLC6A19	5_1213668_G_A	16	15			31		CCLE_WES	0.516129		1.06667
1470	ACH-000630	YD8_UPPER_AERODIGESTIVE_TRACT	Upper aerodigestive	chr5	1208861	1209001	SLC6A19	5_1208964_T_C	23	27			50		CCLE_WES	0.46		0.851852
1471	ACH-000630	YD8_UPPER_AERODIGESTIVE_TRACT	Upper aerodigestive	chr5	1216673	1217060	SLC6A19	5_1216775_A_G	34	33			67		CCLE_WES	0.507463		1.0303
1472	ACH-000632	HS944T_SKIN	Skin	chr5	1221816	1225232	SLC6A19	5_1223772_T_C	34	31			65		CCLE_WGS	0.523077		1.09677
1473	ACH-000632	HS944T_SKIN	Skin	chr5	1221816	1225232	SLC6A19	5_1222499_T_C	17	16			33		CCLE_WGS	0.515152		1.0625
1474	ACH-000632	HS944T_SKIN	Skin	chr5	1216673	1217060	SLC6A19	5_1216900_G_A	19	8			27		CCLE_WGS	0.703704		2.375
1475	ACH-000632	HS944T_SKIN	Skin	chr5	1221816	1225232	SLC6A19	5_1223062_G_T	8	17			25		CCLE_WGS	0.32		0.470588
1476	ACH-000632	HS944T_SKIN	Skin	chr5	1221816	1225232	SLC6A19	5_1224083_C_A	11	14			25		CCLE_WGS	0.44		0.785714
1477	ACH-000632	HS944T_SKIN	Skin	chr5	1221816	1225232	SLC6A19	5_1224174_T_C	12	20			32		CCLE_WGS	0.375		0.6
1478	ACH-000632	HS944T_SKIN	Skin	chr5	1221816	1225232	SLC6A19	5_1224285_G_A	12	16			28		CCLE_WGS	0.428571		0.75
1479	ACH-000632	HS944T_SKIN	Skin	chr5	1221816	1225232	SLC6A19	5_1223845_A_G	23	15			38		CCLE_WGS	0.605263		1.53333
1480	ACH-000632	HS944T_SKIN	Skin	chr5	1221816	1225232	SLC6A19	5_1224405_A_G	20	24			44		CCLE_WGS	0.454545		0.833333
1481	ACH-000632	HS944T_SKIN	Skin	chr5	1221816	1225232	SLC6A19	5_1224001_T_C	13	15			28		CCLE_WGS	0.464286		0.866667
1482	ACH-000633	FU97_STOMACH	Gastric	chr5	1221816	1225232	SLC6A19	5_1225121_C_T	20	124			144		CCLE_WGS	0.138889		0.16129
1483	ACH-000633	FU97_STOMACH	Gastric	chr5	1221816	1225232	SLC6A19	5_1224003_C_T	13	46	7	3	59	10	CCLE_WGS	0.220339	0.7	0.282609	2.33333	8.25641	7.38095	1
1484	ACH-000633	FU97_STOMACH	Gastric	chr5	1221816	1225232	SLC6A19	5_1224285_G_A	116	22	10	6	138	16	CCLE_WGS	0.84058	0.625	5.27273	1.66667	0.316092	0.311984	0
1485	ACH-000633	FU97_STOMACH	Gastric	chr5	1221816	1225232	SLC6A19	5_1224174_T_C	114	13	23	11	127	34	CCLE_WGS	0.897638	0.676471	8.76923	2.09091	0.238437	0.240934	0
1486	ACH-000633	FU97_STOMACH	Gastric	chr5	1221816	1225232	SLC6A19	5_1224083_C_A	83	8	24	4	91	28	CCLE_WGS	0.912088	0.857143	10.375	6	0.578313	0.554225	0
1487	ACH-000633	FU97_STOMACH	Gastric	chr5	1221816	1225232	SLC6A19	5_1223940_A_G	12	71	13	30	83	43	CCLE_WGS	0.144578	0.302326	0.169014	0.433333	2.56389	2.5318	0
1488	ACH-000633	FU97_STOMACH	Gastric	chr5	1221816	1225232	SLC6A19	5_1223835_T_C	13	95	11	46	108	57	CCLE_WGS	0.12037	0.192982	0.136842	0.23913	1.74749	1.7495	0
1489	ACH-000633	FU97_STOMACH	Gastric	chr5	1221816	1225232	SLC6A19	5_1223772_T_C	50	13	36	14	63	50	CCLE_WGS	0.793651	0.72	3.84615	2.57143	0.668571	0.672926	0
1490	ACH-000633	FU97_STOMACH	Gastric	chr5	1221816	1225232	SLC6A19	5_1223700_C_T	23	68	18	18	91	36	CCLE_WGS	0.252747	0.5	0.338235	1	2.95652	2.91489	0
1491	ACH-000633	FU97_STOMACH	Gastric	chr5	1221816	1225232	SLC6A19	5_1223062_G_T	109	9	25	7	118	32	CCLE_WGS	0.923729	0.78125	12.1111	3.57143	0.294889	0.294977	0
1492	ACH-000633	FU97_STOMACH	Gastric	chr5	1221816	1225232	SLC6A19	5_1222484_C_G	16	125	12	38	141	50	CCLE_WGS	0.113475	0.24	0.128	0.315789	2.46711	2.4695	0
1493	ACH-000633	FU97_STOMACH	Gastric	chr5	1221816	1225232	SLC6A19	5_1224405_A_G	128	26	16	2	154	18	CCLE_WGS	0.831169	0.888889	4.92308	8	1.625	1.36109	0
1494	ACH-000635	SNU119_OVARY	Ovary	chr5	1221816	1225232	SLC6A19	5_1223062_G_T	43	27			70		CCLE_WGS	0.614286		1.59259
1495	ACH-000635	SNU119_OVARY	Ovary	chr5	1221816	1225232	SLC6A19	5_1223835_T_C	37	55			92		CCLE_WGS	0.402174		0.672727
1496	ACH-000635	SNU119_OVARY	Ovary	chr5	1221816	1225232	SLC6A19	5_1223940_A_G	38	38			76		CCLE_WGS	0.5		1
1497	ACH-000635	SNU119_OVARY	Ovary	chr5	1221816	1225232	SLC6A19	5_1224083_C_A	34	37			71		CCLE_WGS	0.478873		0.918919
1498	ACH-000635	SNU119_OVARY	Ovary	chr5	1221816	1225232	SLC6A19	5_1224405_A_G	44	35			79		CCLE_WGS	0.556962		1.25714
1499	ACH-000635	SNU119_OVARY	Ovary	chr5	1221816	1225232	SLC6A19	5_1223730_G_A	70	39			109		CCLE_WGS	0.642202		1.79487
1500	ACH-000635	SNU119_OVARY	Ovary	chr5	1221816	1225232	SLC6A19	5_1225121_C_T	20	59			79		CCLE_WGS	0.253165		0.338983
1501	ACH-000635	SNU119_OVARY	Ovary	chr5	1221816	1225232	SLC6A19	5_1224285_G_A	46	36			82		CCLE_WGS	0.560976		1.27778
1502	ACH-000635	SNU119_OVARY	Ovary	chr5	1221816	1225232	SLC6A19	5_1224174_T_C	41	32			73		CCLE_WGS	0.561644		1.28125
1503	ACH-000635	SNU119_OVARY	Ovary	chr5	1221816	1225232	SLC6A19	5_1223772_T_C	89	44			133		CCLE_WGS	0.669173		2.02273
1504	ACH-000636	RPMI8402_HAEMATOPOIETIC_AND_LYMPHOID_TISSUE	Blood	chr5	1216673	1217060	SLC6A19	5_1216900_G_A	38	38			76		CCLE_WES	0.5		1
1505	ACH-000636	RPMI8402_HAEMATOPOIETIC_AND_LYMPHOID_TISSUE	Blood	chr5	1208861	1209001	SLC6A19	5_1208964_T_C	35	22			57		CCLE_WES	0.614035		1.59091
1506	ACH-000637	KYSE520_OESOPHAGUS	Esophagus	chr5	1221816	1225232	SLC6A19	5_1223700_C_T	15	23			38		CCLE_WGS	0.394737		0.652174
1507	ACH-000637	KYSE520_OESOPHAGUS	Esophagus	chr5	1221816	1225232	SLC6A19	5_1224174_T_C	33	12			45		CCLE_WGS	0.733333		2.75
1508	ACH-000637	KYSE520_OESOPHAGUS	Esophagus	chr5	1221816	1225232	SLC6A19	5_1223772_T_C	20	9			29		CCLE_WGS	0.689655		2.22222
1509	ACH-000637	KYSE520_OESOPHAGUS	Esophagus	chr5	1221816	1225232	SLC6A19	5_1223940_A_G	9	47			56		CCLE_WGS	0.160714		0.191489
1510	ACH-000640	SKMEL31_SKIN	Skin	chr5	1213578	1213688	SLC6A19	5_1213668_G_A	19	15			34		CCLE_WES	0.558824		1.26667
1511	ACH-000641	CMK_HAEMATOPOIETIC_AND_LYMPHOID_TISSUE	Blood	chr5	1212418	1212599	SLC6A19	5_1212494_C_T	47	72			119		CCLE_WES	0.394958		0.652778
1512	ACH-000643	HDQP1_BREAST	Breast	chr5	1221816	1225232	SLC6A19	5_1224285_G_A	15	47			62		CCLE_WGS	0.241935		0.319149
1513	ACH-000643	HDQP1_BREAST	Breast	chr5	1221816	1225232	SLC6A19	5_1225043_C_T	12	52			64		CCLE_WGS	0.1875		0.230769
1514	ACH-000643	HDQP1_BREAST	Breast	chr5	1216673	1217060	SLC6A19	5_1216900_G_A	55	11			66		CCLE_WGS	0.833333		5
1515	ACH-000643	HDQP1_BREAST	Breast	chr5	1221816	1225232	SLC6A19	5_1222499_T_C	76	21			97		CCLE_WGS	0.783505		3.61905
1516	ACH-000643	HDQP1_BREAST	Breast	chr5	1221816	1225232	SLC6A19	5_1224405_A_G	16	75			91		CCLE_WGS	0.175824		0.213333
1517	ACH-000643	HDQP1_BREAST	Breast	chr5	1221816	1225232	SLC6A19	5_1223772_T_C	76	78			154		CCLE_WGS	0.493506		0.974359
1518	ACH-000643	HDQP1_BREAST	Breast	chr5	1221816	1225232	SLC6A19	5_1223845_A_G	66	25			91		CCLE_WGS	0.725275		2.64
1519	ACH-000643	HDQP1_BREAST	Breast	chr5	1221816	1225232	SLC6A19	5_1224083_C_A	24	53			77		CCLE_WGS	0.311688		0.45283
1520	ACH-000643	HDQP1_BREAST	Breast	chr5	1221816	1225232	SLC6A19	5_1224174_T_C	20	60			80		CCLE_WGS	0.25		0.333333
1521	ACH-000643	HDQP1_BREAST	Breast	chr5	1221816	1225232	SLC6A19	5_1223062_G_T	10	42			52		CCLE_WGS	0.192308		0.238095
1522	ACH-000646	OVMANA_OVARY	Ovary	chr5	1208861	1209001	SLC6A19	5_1208964_T_C	26	24			50		CCLE_WES	0.52		1.08333
1523	ACH-000646	OVMANA_OVARY	Ovary	chr5	1216673	1217060	SLC6A19	5_1216900_G_A	38	49			87		CCLE_WES	0.436782		0.77551
1524	ACH-000647	TE1_OESOPHAGUS	Esophagus	chr5	1221266	1221428	SLC6A19	5_1221330_C_T	66	11			77		CCLE_WGS	0.857143		6
1525	ACH-000649	786O_KIDNEY	Kidney	chr5	1221816	1225232	SLC6A19	5_1222499_T_C	41	14			55		CCLE_WGS	0.745455		2.92857
1526	ACH-000649	786O_KIDNEY	Kidney	chr5	1221816	1225232	SLC6A19	5_1224405_A_G	17	35			52		CCLE_WGS	0.326923		0.485714
1527	ACH-000649	786O_KIDNEY	Kidney	chr5	1221816	1225232	SLC6A19	5_1224285_G_A	20	48			68		CCLE_WGS	0.294118		0.416667
1528	ACH-000649	786O_KIDNEY	Kidney	chr5	1221816	1225232	SLC6A19	5_1224174_T_C	15	35			50		CCLE_WGS	0.3		0.428571
1529	ACH-000649	786O_KIDNEY	Kidney	chr5	1221816	1225232	SLC6A19	5_1223062_G_T	9	43			52		CCLE_WGS	0.173077		0.209302
1530	ACH-000649	786O_KIDNEY	Kidney	chr5	1221816	1225232	SLC6A19	5_1223384_G_A	33	16			49		CCLE_WGS	0.673469		2.0625
1531	ACH-000649	786O_KIDNEY	Kidney	chr5	1216673	1217060	SLC6A19	5_1216900_G_A	37	14			51		CCLE_WGS	0.72549		2.64286
1532	ACH-000649	786O_KIDNEY	Kidney	chr5	1221816	1225232	SLC6A19	5_1223772_T_C	57	53			110		CCLE_WGS	0.518182		1.07547
1533	ACH-000649	786O_KIDNEY	Kidney	chr5	1221816	1225232	SLC6A19	5_1223845_A_G	22	16			38		CCLE_WGS	0.578947		1.375
1534	ACH-000649	786O_KIDNEY	Kidney	chr5	1221816	1225232	SLC6A19	5_1224001_T_C	15	44			59		CCLE_WGS	0.254237		0.340909
1535	ACH-000649	786O_KIDNEY	Kidney	chr5	1221816	1225232	SLC6A19	5_1224083_C_A	14	32			46		CCLE_WGS	0.304348		0.4375
1536	ACH-000652	SUIT2_PANCREAS	Pancreas	chr5	1208861	1209001	SLC6A19	5_1208964_T_C	11	10			21		CCLE_WGS	0.52381		1.1
1537	ACH-000652	SUIT2_PANCREAS	Pancreas	chr5	1216673	1217060	SLC6A19	5_1216900_G_A	24	13			37		CCLE_WGS	0.648649		1.84615
1538	ACH-000652	SUIT2_PANCREAS	Pancreas	chr5	1221816	1225232	SLC6A19	5_1223730_G_A	8	14			22		CCLE_WGS	0.363636		0.571429
1539	ACH-000652	SUIT2_PANCREAS	Pancreas	chr5	1221816	1225232	SLC6A19	5_1223700_C_T	14	12			26		CCLE_WGS	0.538462		1.16667
1540	ACH-000657	A2780_OVARY	Ovary	chr5	1221816	1225232	SLC6A19	5_1225121_C_T	20	22			42		CCLE_WGS	0.47619		0.909091
1541	ACH-000657	A2780_OVARY	Ovary	chr5	1221816	1225232	SLC6A19	5_1224795_G_C	28	24			52		CCLE_WGS	0.538462		1.16667
1542	ACH-000657	A2780_OVARY	Ovary	chr5	1221816	1225232	SLC6A19	5_1224003_C_T	18	14			32		CCLE_WGS	0.5625		1.28571
1543	ACH-000657	A2780_OVARY	Ovary	chr5	1221816	1225232	SLC6A19	5_1223845_A_G	28	26			54		CCLE_WGS	0.518519		1.07692
1544	ACH-000657	A2780_OVARY	Ovary	chr5	1221816	1225232	SLC6A19	5_1223835_T_C	21	29			50		CCLE_WGS	0.42		0.724138
1545	ACH-000657	A2780_OVARY	Ovary	chr5	1216673	1217060	SLC6A19	5_1216900_G_A	36	23			59		CCLE_WGS	0.610169		1.56522
1546	ACH-000657	A2780_OVARY	Ovary	chr5	1213578	1213688	SLC6A19	5_1213668_G_A	15	17			32		CCLE_WGS	0.46875		0.882353
1547	ACH-000657	A2780_OVARY	Ovary	chr5	1208861	1209001	SLC6A19	5_1208964_T_C	13	21			34		CCLE_WGS	0.382353		0.619048
1548	ACH-000657	A2780_OVARY	Ovary	chr5	1221816	1225232	SLC6A19	5_1222740_G_C	21	29			50		CCLE_WGS	0.42		0.724138
1549	ACH-000657	A2780_OVARY	Ovary	chr5	1221816	1225232	SLC6A19	5_1222319_C_G	28	28			56		CCLE_WGS	0.5		1
1550	ACH-000659	SCLC21H_LUNG	Lung	chr5	1221816	1225232	SLC6A19	5_1222499_T_C	20	23			43		CCLE_WGS	0.465116		0.869565
1551	ACH-000659	SCLC21H_LUNG	Lung	chr5	1221816	1225232	SLC6A19	5_1225121_C_T	25	8			33		CCLE_WGS	0.757576		3.125
1552	ACH-000659	SCLC21H_LUNG	Lung	chr5	1221816	1225232	SLC6A19	5_1223845_A_G	11	24			35		CCLE_WGS	0.314286		0.458333
1553	ACH-000659	SCLC21H_LUNG	Lung	chr5	1221816	1225232	SLC6A19	5_1223835_T_C	24	9			33		CCLE_WGS	0.727273		2.66667
1554	ACH-000659	SCLC21H_LUNG	Lung	chr5	1221816	1225232	SLC6A19	5_1223730_G_A	28	13			41		CCLE_WGS	0.682927		2.15385
1555	ACH-000660	SUDHL5_HAEMATOPOIETIC_AND_LYMPHOID_TISSUE	Lymphocyte	chr5	1216673	1217060	SLC6A19	5_1216900_G_A	41	48			89		CCLE_WES	0.460674		0.854167
1556	ACH-000661	WM1799_SKIN	Skin	chr5	1208861	1209001	SLC6A19	5_1208964_T_C	15	26			41		CCLE_WES	0.365854		0.576923
1557	ACH-000661	WM1799_SKIN	Skin	chr5	1216673	1217060	SLC6A19	5_1216900_G_A	50	104			154		CCLE_WES	0.324675		0.480769
1558	ACH-000661	WM1799_SKIN	Skin	chr5	1221816	1225232	SLC6A19	5_1221905_C_T	88	35			123		CCLE_WES	0.715447		2.51429
1559	ACH-000662	CORL23_LUNG	Lung	chr5	1208861	1209001	SLC6A19	5_1208964_T_C	19	36			55		CCLE_WGS	0.345455		0.527778
1560	ACH-000662	CORL23_LUNG	Lung	chr5	1221816	1225232	SLC6A19	5_1223845_A_G	64	19			83		CCLE_WGS	0.771084		3.36842
1561	ACH-000662	CORL23_LUNG	Lung	chr5	1216673	1217060	SLC6A19	5_1216900_G_A	54	13			67		CCLE_WGS	0.80597		4.15385
1562	ACH-000662	CORL23_LUNG	Lung	chr5	1221816	1225232	SLC6A19	5_1222499_T_C	59	19			78		CCLE_WGS	0.75641		3.10526
1563	ACH-000662	CORL23_LUNG	Lung	chr5	1221816	1225232	SLC6A19	5_1224083_C_A	20	46			66		CCLE_WGS	0.30303		0.434783
1564	ACH-000662	CORL23_LUNG	Lung	chr5	1221816	1225232	SLC6A19	5_1223062_G_T	16	51			67		CCLE_WGS	0.238806		0.313725
1565	ACH-000662	CORL23_LUNG	Lung	chr5	1221816	1225232	SLC6A19	5_1223772_T_C	82	31			113		CCLE_WGS	0.725664		2.64516
1566	ACH-000662	CORL23_LUNG	Lung	chr5	1221816	1225232	SLC6A19	5_1224174_T_C	20	60			80		CCLE_WGS	0.25		0.333333
1567	ACH-000662	CORL23_LUNG	Lung	chr5	1221816	1225232	SLC6A19	5_1224285_G_A	15	56			71		CCLE_WGS	0.211268		0.267857
1568	ACH-000662	CORL23_LUNG	Lung	chr5	1221816	1225232	SLC6A19	5_1224405_A_G	23	77			100		CCLE_WGS	0.23		0.298701
1569	ACH-000666	NCIH1355_LUNG	Lung	chr5	1221816	1225232	SLC6A19	5_1224174_T_C	12	32			44		CCLE_WGS	0.272727		0.375
1570	ACH-000666	NCIH1355_LUNG	Lung	chr5	1221816	1225232	SLC6A19	5_1224405_A_G	14	30			44		CCLE_WGS	0.318182		0.466667
1571	ACH-000666	NCIH1355_LUNG	Lung	chr5	1221816	1225232	SLC6A19	5_1224285_G_A	11	24			35		CCLE_WGS	0.314286		0.458333
1572	ACH-000666	NCIH1355_LUNG	Lung	chr5	1221816	1225232	SLC6A19	5_1224001_T_C	8	21			29		CCLE_WGS	0.275862		0.380952
1573	ACH-000666	NCIH1355_LUNG	Lung	chr5	1221816	1225232	SLC6A19	5_1224083_C_A	12	38			50		CCLE_WGS	0.24		0.315789
1574	ACH-000666	NCIH1355_LUNG	Lung	chr5	1221816	1225232	SLC6A19	5_1223062_G_T	8	24			32		CCLE_WGS	0.25		0.333333
1575	ACH-000666	NCIH1355_LUNG	Lung	chr5	1221816	1225232	SLC6A19	5_1223845_A_G	34	16			50		CCLE_WGS	0.68		2.125
1576	ACH-000666	NCIH1355_LUNG	Lung	chr5	1221816	1225232	SLC6A19	5_1222499_T_C	23	8			31		CCLE_WGS	0.741935		2.875
1577	ACH-000666	NCIH1355_LUNG	Lung	chr5	1216673	1217060	SLC6A19	5_1216900_G_A	28	10			38		CCLE_WGS	0.736842		2.8
1578	ACH-000666	NCIH1355_LUNG	Lung	chr5	1221816	1225232	SLC6A19	5_1223772_T_C	42	14			56		CCLE_WGS	0.75		3
1579	ACH-000667	HCC44_LUNG	Lung	chr5	1213578	1213688	SLC6A19	5_1213668_G_A	85	38			123		CCLE_WGS	0.691057		2.23684
1580	ACH-000667	HCC44_LUNG	Lung	chr5	1221816	1225232	SLC6A19	5_1225121_C_T	61	90			151		CCLE_WGS	0.403974		0.677778
1581	ACH-000667	HCC44_LUNG	Lung	chr5	1221816	1225232	SLC6A19	5_1223730_G_A	123	91			214		CCLE_WGS	0.574766		1.35165
1582	ACH-000667	HCC44_LUNG	Lung	chr5	1221816	1225232	SLC6A19	5_1223835_T_C	63	116			179		CCLE_WGS	0.351955		0.543103
1583	ACH-000667	HCC44_LUNG	Lung	chr5	1208861	1209001	SLC6A19	5_1208964_T_C	62	35			97		CCLE_WGS	0.639175		1.77143
1584	ACH-000667	HCC44_LUNG	Lung	chr5	1221816	1225232	SLC6A19	5_1224405_A_G	131	95			226		CCLE_WGS	0.579646		1.37895
1585	ACH-000667	HCC44_LUNG	Lung	chr5	1221816	1225232	SLC6A19	5_1224285_G_A	89	45			134		CCLE_WGS	0.664179		1.97778
1586	ACH-000667	HCC44_LUNG	Lung	chr5	1221816	1225232	SLC6A19	5_1224174_T_C	118	77			195		CCLE_WGS	0.605128		1.53247
1587	ACH-000667	HCC44_LUNG	Lung	chr5	1221816	1225232	SLC6A19	5_1224083_C_A	82	39			121		CCLE_WGS	0.677686		2.10256
1588	ACH-000667	HCC44_LUNG	Lung	chr5	1221816	1225232	SLC6A19	5_1224003_C_T	37	41			78		CCLE_WGS	0.474359		0.902439
1589	ACH-000667	HCC44_LUNG	Lung	chr5	1221816	1225232	SLC6A19	5_1223940_A_G	61	63			124		CCLE_WGS	0.491935		0.968254
1590	ACH-000667	HCC44_LUNG	Lung	chr5	1221816	1225232	SLC6A19	5_1223062_G_T	83	71			154		CCLE_WGS	0.538961		1.16901
1591	ACH-000667	HCC44_LUNG	Lung	chr5	1221816	1225232	SLC6A19	5_1223772_T_C	152	64			216		CCLE_WGS	0.703704		2.375
1592	ACH-000668	HCC70_BREAST	Breast	chr5	1221816	1225232	SLC6A19	5_1223062_G_T	136	23			159		CCLE_WGS	0.855346		5.91304
1593	ACH-000668	HCC70_BREAST	Breast	chr5	1201710	1201967	SLC6A19	5_1201758_C_T	15	118			133		CCLE_WGS	0.112782		0.127119
1594	ACH-000668	HCC70_BREAST	Breast	chr5	1201710	1201967	SLC6A19	5_1201882_G_A	13	124			137		CCLE_WGS	0.0948905		0.104839
1595	ACH-000668	HCC70_BREAST	Breast	chr5	1221816	1225232	SLC6A19	5_1224795_G_C	153	18			171		CCLE_WGS	0.894737		8.5
1596	ACH-000668	HCC70_BREAST	Breast	chr5	1221816	1225232	SLC6A19	5_1224051_C_T	150	22			172		CCLE_WGS	0.872093		6.81818
1597	ACH-000668	HCC70_BREAST	Breast	chr5	1221816	1225232	SLC6A19	5_1224001_T_C	141	22			163		CCLE_WGS	0.865031		6.40909
1598	ACH-000668	HCC70_BREAST	Breast	chr5	1208861	1209001	SLC6A19	5_1208964_T_C	9	73			82		CCLE_WGS	0.109756		0.123288
1599	ACH-000668	HCC70_BREAST	Breast	chr5	1221816	1225232	SLC6A19	5_1223730_G_A	145	27			172		CCLE_WGS	0.843023		5.37037
1600	ACH-000668	HCC70_BREAST	Breast	chr5	1221816	1225232	SLC6A19	5_1223500_G_C	133	27			160		CCLE_WGS	0.83125		4.92593
1601	ACH-000668	HCC70_BREAST	Breast	chr5	1221816	1225232	SLC6A19	5_1223294_C_T	131	18			149		CCLE_WGS	0.879195		7.27778
1602	ACH-000668	HCC70_BREAST	Breast	chr5	1213578	1213688	SLC6A19	5_1213668_G_A	10	104			114		CCLE_WGS	0.0877193		0.0961538
1603	ACH-000668	HCC70_BREAST	Breast	chr5	1221816	1225232	SLC6A19	5_1223940_A_G	142	19			161		CCLE_WGS	0.881988		7.47368
1604	ACH-000668	HCC70_BREAST	Breast	chr5	1221816	1225232	SLC6A19	5_1224490_G_T	162	23			185		CCLE_WGS	0.875676		7.04348
1605	ACH-000674	NUGC4_STOMACH	Gastric	chr5	1221816	1225232	SLC6A19	5_1223835_T_C	17	26	11	3	43	14	CCLE_WGS	0.395349	0.785714	0.653846	3.66667	5.60784	4.97551	0
1606	ACH-000674	NUGC4_STOMACH	Gastric	chr5	1221816	1225232	SLC6A19	5_1224405_A_G	25	37			62		CCLE_WGS	0.403226		0.675676
1607	ACH-000674	NUGC4_STOMACH	Gastric	chr5	1221816	1225232	SLC6A19	5_1224083_C_A	22	15			37		CCLE_WGS	0.594595		1.46667
1608	ACH-000674	NUGC4_STOMACH	Gastric	chr5	1221816	1225232	SLC6A19	5_1225121_C_T	19	26			45		CCLE_WGS	0.422222		0.730769
1609	ACH-000674	NUGC4_STOMACH	Gastric	chr5	1208861	1209001	SLC6A19	5_1208964_T_C	27	20			47		CCLE_WES	0.574468		1.35
1610	ACH-000674	NUGC4_STOMACH	Gastric	chr5	1213578	1213688	SLC6A19	5_1213668_G_A	18	18			36		CCLE_WES	0.5		1
1611	ACH-000674	NUGC4_STOMACH	Gastric	chr5	1221816	1225232	SLC6A19	5_1224003_C_T	14	12			26		CCLE_WGS	0.538462		1.16667
1612	ACH-000674	NUGC4_STOMACH	Gastric	chr5	1221816	1225232	SLC6A19	5_1223940_A_G	18	14	10	2	32	12	CCLE_WGS	0.5625	0.833333	1.28571	5	3.88889	3.29189	0
1613	ACH-000674	NUGC4_STOMACH	Gastric	chr5	1221816	1225232	SLC6A19	5_1223772_T_C	40	30	9	20	70	29	CCLE_WGS	0.571429	0.310345	1.33333	0.45	0.3375	0.348991	0
1614	ACH-000674	NUGC4_STOMACH	Gastric	chr5	1221816	1225232	SLC6A19	5_1223730_G_A	45	28	29	2	73	31	CCLE_WGS	0.616438	0.935484	1.60714	14.5	9.02222	7.39121	1
1615	ACH-000674	NUGC4_STOMACH	Gastric	chr5	1221816	1225232	SLC6A19	5_1224174_T_C	18	30	3	7	48	10	CCLE_WGS	0.375	0.3	0.6	0.428571	0.714286	0.769369	0
1616	ACH-000674	NUGC4_STOMACH	Gastric	chr5	1221816	1225232	SLC6A19	5_1223062_G_T	10	18	4	12	28	16	CCLE_WGS	0.357143	0.25	0.555556	0.333333	0.6	0.634286	0
1617	ACH-000674	NUGC4_STOMACH	Gastric	chr5	1208861	1209001	SLC6A19	5_1208964_T_C	12	11			23		CCLE_WGS	0.521739		1.09091
1618	ACH-000674	NUGC4_STOMACH	Gastric	chr5	1221816	1225232	SLC6A19	5_1225106_C_T	19	21			40		CCLE_WGS	0.475		0.904762
1619	ACH-000674	NUGC4_STOMACH	Gastric	chr5	1213578	1213688	SLC6A19	5_1213668_G_A	11	15			26		CCLE_WGS	0.423077		0.733333
1620	ACH-000674	NUGC4_STOMACH	Gastric	chr5	1221816	1225232	SLC6A19	5_1224285_G_A	19	23			42		CCLE_WGS	0.452381		0.826087
1621	ACH-000678	MKN7_STOMACH	Gastric	chr5	1216673	1217060	SLC6A19	5_1216775_A_G	25	44			69		CCLE_WGS	0.362319		0.568182
1622	ACH-000678	MKN7_STOMACH	Gastric	chr5	1216673	1217060	SLC6A19	5_1216900_G_A	35	47			82		CCLE_WGS	0.426829		0.744681
1623	ACH-000678	MKN7_STOMACH	Gastric	chr5	1208861	1209001	SLC6A19	5_1208964_T_C	17	25			42		CCLE_WGS	0.404762		0.68
1624	ACH-000679	OE19_OESOPHAGUS	Esophagus	chr5	1221816	1225232	SLC6A19	5_1224003_C_T	14	11			25		CCLE_WGS	0.56		1.27273
1625	ACH-000679	OE19_OESOPHAGUS	Esophagus	chr5	1221816	1225232	SLC6A19	5_1223252_T_C	16	16	4	4	32	8	CCLE_WGS	0.5	0.5	1	1	1	1	0
1626	ACH-000679	OE19_OESOPHAGUS	Esophagus	chr5	1221816	1225232	SLC6A19	5_1224001_T_C	13	12			25		CCLE_WGS	0.52		1.08333
1627	ACH-000679	OE19_OESOPHAGUS	Esophagus	chr5	1221816	1225232	SLC6A19	5_1223940_A_G	13	15	5	3	28	8	CCLE_WGS	0.464286	0.625	0.866667	1.66667	1.92308	1.80423	0
1628	ACH-000679	OE19_OESOPHAGUS	Esophagus	chr5	1221816	1225232	SLC6A19	5_1223845_A_G	14	18			32		CCLE_WGS	0.4375		0.777778
1629	ACH-000679	OE19_OESOPHAGUS	Esophagus	chr5	1221816	1225232	SLC6A19	5_1223835_T_C	16	14			30		CCLE_WGS	0.533333		1.14286
1630	ACH-000679	OE19_OESOPHAGUS	Esophagus	chr5	1221816	1225232	SLC6A19	5_1223730_G_A	10	20			30		CCLE_WGS	0.333333		0.5
1631	ACH-000679	OE19_OESOPHAGUS	Esophagus	chr5	1221816	1225232	SLC6A19	5_1222499_T_C	26	13			39		CCLE_WGS	0.666667		2
1632	ACH-000679	OE19_OESOPHAGUS	Esophagus	chr5	1216673	1217060	SLC6A19	5_1216900_G_A	11	12			23		CCLE_WGS	0.478261		0.916667
1633	ACH-000679	OE19_OESOPHAGUS	Esophagus	chr5	1221816	1225232	SLC6A19	5_1225121_C_T	10	13			23		CCLE_WGS	0.434783		0.769231
1634	ACH-000680	SW948_LARGE_INTESTINE	Colorectal	chr5	1221816	1225232	SLC6A19	5_1223700_C_T	20	10			30		CCLE_WGS	0.666667		2
1635	ACH-000681	A549_LUNG	Lung	chr5	1221816	1225232	SLC6A19	5_1224003_C_T	43	8			51		CCLE_WGS	0.843137		5.375
1636	ACH-000681	A549_LUNG	Lung	chr5	1221816	1225232	SLC6A19	5_1223940_A_G	52	21			73		CCLE_WGS	0.712329		2.47619
1637	ACH-000681	A549_LUNG	Lung	chr5	1221816	1225232	SLC6A19	5_1223835_T_C	49	24			73		CCLE_WGS	0.671233		2.04167
1638	ACH-000681	A549_LUNG	Lung	chr5	1221816	1225232	SLC6A19	5_1223772_T_C	62	41			103		CCLE_WGS	0.601942		1.5122
1639	ACH-000681	A549_LUNG	Lung	chr5	1221816	1225232	SLC6A19	5_1223730_G_A	74	17			91		CCLE_WGS	0.813187		4.35294
1640	ACH-000681	A549_LUNG	Lung	chr5	1221816	1225232	SLC6A19	5_1224083_C_A	20	47			67		CCLE_WGS	0.298507		0.425532
1641	ACH-000681	A549_LUNG	Lung	chr5	1221816	1225232	SLC6A19	5_1224174_T_C	38	67			105		CCLE_WGS	0.361905		0.567164
1642	ACH-000681	A549_LUNG	Lung	chr5	1221816	1225232	SLC6A19	5_1224285_G_A	26	41			67		CCLE_WGS	0.38806		0.634146
1643	ACH-000681	A549_LUNG	Lung	chr5	1221816	1225232	SLC6A19	5_1223062_G_T	28	77			105		CCLE_WGS	0.266667		0.363636
1644	ACH-000681	A549_LUNG	Lung	chr5	1221816	1225232	SLC6A19	5_1224405_A_G	32	57			89		CCLE_WGS	0.359551		0.561404
1645	ACH-000681	A549_LUNG	Lung	chr5	1221816	1225232	SLC6A19	5_1225121_C_T	42	22			64		CCLE_WGS	0.65625		1.90909
1646	ACH-000682	SNU1066_UPPER_AERODIGESTIVE_TRACT	Upper aerodigestive	chr5	1216673	1217060	SLC6A19	5_1216775_A_G	131	189			320		CCLE_WES	0.409375		0.693122
1647	ACH-000683	SNU503_LARGE_INTESTINE	Colorectal	chr5	1216673	1217060	SLC6A19	5_1216775_A_G	53	49			102		CCLE_WES	0.519608		1.08163
1648	ACH-000687	CI1_HAEMATOPOIETIC_AND_LYMPHOID_TISSUE	Lymphocyte	chr5	1216673	1217060	SLC6A19	5_1216833_G_A	27	20			47		CCLE_WES	0.574468		1.35
1649	ACH-000688	OV7_OVARY	Ovary	chr5	1216673	1217060	SLC6A19	5_1216900_G_A	23	21			44		CCLE_WGS	0.522727		1.09524
1650	ACH-000688	OV7_OVARY	Ovary	chr5	1221816	1225232	SLC6A19	5_1222480_C_T	36	38			74		CCLE_WGS	0.486486		0.947368
1651	ACH-000688	OV7_OVARY	Ovary	chr5	1221816	1225232	SLC6A19	5_1222667_G_A	24	33			57		CCLE_WGS	0.421053		0.727273
1652	ACH-000688	OV7_OVARY	Ovary	chr5	1221816	1225232	SLC6A19	5_1223874_A_G	29	13			42		CCLE_WGS	0.690476		2.23077
1653	ACH-000688	OV7_OVARY	Ovary	chr5	1221816	1225232	SLC6A19	5_1223772_T_C	43	11			54		CCLE_WGS	0.796296		3.90909
1654	ACH-000688	OV7_OVARY	Ovary	chr5	1221816	1225232	SLC6A19	5_1223786_T_C	46	8			54		CCLE_WGS	0.851852		5.75
1655	ACH-000688	OV7_OVARY	Ovary	chr5	1221816	1225232	SLC6A19	5_1223940_A_G	28	17			45		CCLE_WGS	0.622222		1.64706
1656	ACH-000688	OV7_OVARY	Ovary	chr5	1221816	1225232	SLC6A19	5_1224003_C_T	28	15			43		CCLE_WGS	0.651163		1.86667
1657	ACH-000688	OV7_OVARY	Ovary	chr5	1221816	1225232	SLC6A19	5_1224405_A_G	20	30			50		CCLE_WGS	0.4		0.666667
1658	ACH-000688	OV7_OVARY	Ovary	chr5	1221816	1225232	SLC6A19	5_1224795_G_C	33	31			64		CCLE_WGS	0.515625		1.06452
1659	ACH-000688	OV7_OVARY	Ovary	chr5	1221816	1225232	SLC6A19	5_1225121_C_T	28	24			52		CCLE_WGS	0.538462		1.16667
1660	ACH-000688	OV7_OVARY	Ovary	chr5	1221816	1225232	SLC6A19	5_1223730_G_A	38	23			61		CCLE_WGS	0.622951		1.65217
1661	ACH-000691	HCC2157_BREAST	Breast	chr5	1221816	1225232	SLC6A19	5_1225121_C_T	15	33			48		CCLE_WGS	0.3125		0.454545
1662	ACH-000691	HCC2157_BREAST	Breast	chr5	1221816	1225232	SLC6A19	5_1223500_G_C	30	17			47		CCLE_WGS	0.638298		1.76471
1663	ACH-000691	HCC2157_BREAST	Breast	chr5	1221816	1225232	SLC6A19	5_1222171_T_C	16	35			51		CCLE_WGS	0.313725		0.457143
1664	ACH-000691	HCC2157_BREAST	Breast	chr5	1201710	1201967	SLC6A19	5_1201758_C_T	22	33			55		CCLE_WGS	0.4		0.666667
1665	ACH-000691	HCC2157_BREAST	Breast	chr5	1221816	1225232	SLC6A19	5_1223294_C_T	34	19			53		CCLE_WGS	0.641509		1.78947
1666	ACH-000691	HCC2157_BREAST	Breast	chr5	1221816	1225232	SLC6A19	5_1223062_G_T	28	16			44		CCLE_WGS	0.636364		1.75
1667	ACH-000693	KYSE180_OESOPHAGUS	Esophagus	chr5	1201710	1201967	SLC6A19	5_1201806_G_A	34	17			51		CCLE_WGS	0.666667		2
1668	ACH-000693	KYSE180_OESOPHAGUS	Esophagus	chr5	1221816	1225232	SLC6A19	5_1222776_G_A	18	56			74		CCLE_WGS	0.243243		0.321429
1669	ACH-000701	RMUGS_OVARY	Ovary	chr5	1216673	1217060	SLC6A19	5_1216775_A_G	32	26			58		CCLE_WES	0.551724		1.23077
1670	ACH-000701	RMUGS_OVARY	Ovary	chr5	1208861	1209001	SLC6A19	5_1208964_T_C	33	24			57		CCLE_WES	0.578947		1.375
1671	ACH-000702	L1236_HAEMATOPOIETIC_AND_LYMPHOID_TISSUE	Lymphocyte	chr5	1213578	1213688	SLC6A19	5_1213668_G_A	24	14			38		CCLE_WES	0.631579		1.71429
1672	ACH-000702	L1236_HAEMATOPOIETIC_AND_LYMPHOID_TISSUE	Lymphocyte	chr5	1216673	1217060	SLC6A19	5_1216900_G_A	33	53			86		CCLE_WES	0.383721		0.622642
1673	ACH-000703	DMS79_LUNG	Lung	chr5	1216673	1217060	SLC6A19	5_1216900_G_A	18	21			39		CCLE_WGS	0.461538		0.857143
1674	ACH-000703	DMS79_LUNG	Lung	chr5	1216673	1217060	SLC6A19	5_1216900_G_A	40	82			122		CCLE_WES	0.327869		0.487805
1675	ACH-000703	DMS79_LUNG	Lung	chr5	1221816	1225232	SLC6A19	5_1224795_G_C	23	13			36		CCLE_WGS	0.638889		1.76923
1676	ACH-000703	DMS79_LUNG	Lung	chr5	1221816	1225232	SLC6A19	5_1224572_G_A	16	24			40		CCLE_WGS	0.4		0.666667
1677	ACH-000703	DMS79_LUNG	Lung	chr5	1221816	1225232	SLC6A19	5_1224285_G_A	33	19			52		CCLE_WGS	0.634615		1.73684
1678	ACH-000703	DMS79_LUNG	Lung	chr5	1221816	1225232	SLC6A19	5_1222480_C_T	19	33			52		CCLE_WGS	0.365385		0.575758
1679	ACH-000703	DMS79_LUNG	Lung	chr5	1221816	1225232	SLC6A19	5_1224083_C_A	28	12			40		CCLE_WGS	0.7		2.33333
1680	ACH-000703	DMS79_LUNG	Lung	chr5	1221816	1225232	SLC6A19	5_1223786_T_C	44	12			56		CCLE_WGS	0.785714		3.66667
1681	ACH-000703	DMS79_LUNG	Lung	chr5	1221816	1225232	SLC6A19	5_1223772_T_C	34	29			63		CCLE_WGS	0.539683		1.17241
1682	ACH-000703	DMS79_LUNG	Lung	chr5	1221816	1225232	SLC6A19	5_1223700_C_T	43	10			53		CCLE_WGS	0.811321		4.3
1683	ACH-000703	DMS79_LUNG	Lung	chr5	1221816	1225232	SLC6A19	5_1223062_G_T	23	21			44		CCLE_WGS	0.522727		1.09524
1684	ACH-000703	DMS79_LUNG	Lung	chr5	1221816	1225232	SLC6A19	5_1222667_G_A	17	39			56		CCLE_WGS	0.303571		0.435897
1685	ACH-000703	DMS79_LUNG	Lung	chr5	1221816	1225232	SLC6A19	5_1224174_T_C	34	15			49		CCLE_WGS	0.693878		2.26667
1686	ACH-000704	OAW42_OVARY	Ovary	chr5	1216673	1217060	SLC6A19	5_1216900_G_A	50	14			64		CCLE_WGS	0.78125		3.57143
1687	ACH-000704	OAW42_OVARY	Ovary	chr5	1221816	1225232	SLC6A19	5_1224285_G_A	8	41			49		CCLE_WGS	0.163265		0.195122
1688	ACH-000704	OAW42_OVARY	Ovary	chr5	1221816	1225232	SLC6A19	5_1224174_T_C	8	39			47		CCLE_WGS	0.170213		0.205128
1689	ACH-000704	OAW42_OVARY	Ovary	chr5	1221816	1225232	SLC6A19	5_1224083_C_A	10	26			36		CCLE_WGS	0.277778		0.384615
1690	ACH-000704	OAW42_OVARY	Ovary	chr5	1221816	1225232	SLC6A19	5_1222667_G_A	32	16			48		CCLE_WGS	0.666667		2
1691	ACH-000704	OAW42_OVARY	Ovary	chr5	1221816	1225232	SLC6A19	5_1223062_G_T	10	42			52		CCLE_WGS	0.192308		0.238095
1692	ACH-000704	OAW42_OVARY	Ovary	chr5	1221816	1225232	SLC6A19	5_1223772_T_C	33	33			66		CCLE_WGS	0.5		1
1693	ACH-000704	OAW42_OVARY	Ovary	chr5	1221816	1225232	SLC6A19	5_1222480_C_T	39	8			47		CCLE_WGS	0.829787		4.875
1694	ACH-000705	LC1F_LUNG	Lung	chr5	1221816	1225232	SLC6A19	5_1224001_T_C	32	18			50		CCLE_WGS	0.64		1.77778
1695	ACH-000705	LC1F_LUNG	Lung	chr5	1208861	1209001	SLC6A19	5_1208964_T_C	26	9			35		CCLE_WGS	0.742857		2.88889
1696	ACH-000705	LC1F_LUNG	Lung	chr5	1216673	1217060	SLC6A19	5_1216775_A_G	31	17			48		CCLE_WGS	0.645833		1.82353
1697	ACH-000705	LC1F_LUNG	Lung	chr5	1219620	1219779	SLC6A19	5_1219687_C_A	30	20			50		CCLE_WGS	0.6		1.5
1698	ACH-000705	LC1F_LUNG	Lung	chr5	1221816	1225232	SLC6A19	5_1223700_C_T	45	10			55		CCLE_WGS	0.818182		4.5
1699	ACH-000705	LC1F_LUNG	Lung	chr5	1221816	1225232	SLC6A19	5_1223835_T_C	28	19			47		CCLE_WGS	0.595745		1.47368
1700	ACH-000705	LC1F_LUNG	Lung	chr5	1221816	1225232	SLC6A19	5_1223940_A_G	35	22			57		CCLE_WGS	0.614035		1.59091
1701	ACH-000705	LC1F_LUNG	Lung	chr5	1221816	1225232	SLC6A19	5_1224003_C_T	35	18			53		CCLE_WGS	0.660377		1.94444
1702	ACH-000705	LC1F_LUNG	Lung	chr5	1221816	1225232	SLC6A19	5_1224795_G_C	39	12			51		CCLE_WGS	0.764706		3.25
1703	ACH-000705	LC1F_LUNG	Lung	chr5	1221816	1225232	SLC6A19	5_1224490_G_T	31	18			49		CCLE_WGS	0.632653		1.72222
1704	ACH-000705	LC1F_LUNG	Lung	chr5	1221816	1225232	SLC6A19	5_1224051_C_T	35	22			57		CCLE_WGS	0.614035		1.59091
1705	ACH-000705	LC1F_LUNG	Lung	chr5	1221816	1225232	SLC6A19	5_1225121_C_T	39	15			54		CCLE_WGS	0.722222		2.6
1706	ACH-000707	P3HR1_HAEMATOPOIETIC_AND_LYMPHOID_TISSUE	Lymphocyte	chr5	1208861	1209001	SLC6A19	5_1208964_T_C	22	18			40		CCLE_WES	0.55		1.22222
1707	ACH-000707	P3HR1_HAEMATOPOIETIC_AND_LYMPHOID_TISSUE	Lymphocyte	chr5	1216673	1217060	SLC6A19	5_1216900_G_A	43	41			84		CCLE_WES	0.511905		1.04878
1708	ACH-000707	P3HR1_HAEMATOPOIETIC_AND_LYMPHOID_TISSUE	Lymphocyte	chr5	1216673	1217060	SLC6A19	5_1216775_A_G	25	27			52		CCLE_WES	0.480769		0.925926
1709	ACH-000708	SNU283_LARGE_INTESTINE	Colorectal	chr5	1208861	1209001	SLC6A19	5_1208964_T_C	24	30			54		CCLE_WES	0.444444		0.8
1710	ACH-000712	HCC1833_LUNG	Lung	chr5	1221816	1225232	SLC6A19	5_1222499_T_C	32	28			60		CCLE_WGS	0.533333		1.14286
1711	ACH-000712	HCC1833_LUNG	Lung	chr5	1221816	1225232	SLC6A19	5_1223845_A_G	9	11			20		CCLE_WGS	0.45		0.818182
1712	ACH-000712	HCC1833_LUNG	Lung	chr5	1221816	1225232	SLC6A19	5_1223772_T_C	22	12			34		CCLE_WGS	0.647059		1.83333
1713	ACH-000713	CAOV3_OVARY	Ovary	chr5	1221816	1225232	SLC6A19	5_1223772_T_C	68	118			186		CCLE_WGS	0.365591		0.576271
1714	ACH-000714	KMS11_HAEMATOPOIETIC_AND_LYMPHOID_TISSUE	Plasma cell	chr5	1221816	1225232	SLC6A19	5_1224285_G_A	16	24			40		CCLE_WGS	0.4		0.666667
1715	ACH-000714	KMS11_HAEMATOPOIETIC_AND_LYMPHOID_TISSUE	Plasma cell	chr5	1221816	1225232	SLC6A19	5_1224174_T_C	40	39			79		CCLE_WGS	0.506329		1.02564
1716	ACH-000714	KMS11_HAEMATOPOIETIC_AND_LYMPHOID_TISSUE	Plasma cell	chr5	1221816	1225232	SLC6A19	5_1223940_A_G	31	22			53		CCLE_WGS	0.584906		1.40909
1717	ACH-000714	KMS11_HAEMATOPOIETIC_AND_LYMPHOID_TISSUE	Plasma cell	chr5	1221816	1225232	SLC6A19	5_1223835_T_C	31	27			58		CCLE_WGS	0.534483		1.14815
1718	ACH-000714	KMS11_HAEMATOPOIETIC_AND_LYMPHOID_TISSUE	Plasma cell	chr5	1221816	1225232	SLC6A19	5_1223730_G_A	73	27			100		CCLE_WGS	0.73		2.7037
1719	ACH-000714	KMS11_HAEMATOPOIETIC_AND_LYMPHOID_TISSUE	Plasma cell	chr5	1221816	1225232	SLC6A19	5_1223772_T_C	57	44			101		CCLE_WGS	0.564356		1.29545
1720	ACH-000714	KMS11_HAEMATOPOIETIC_AND_LYMPHOID_TISSUE	Plasma cell	chr5	1213578	1213688	SLC6A19	5_1213668_G_A	14	20			34		CCLE_WGS	0.411765		0.7
1721	ACH-000714	KMS11_HAEMATOPOIETIC_AND_LYMPHOID_TISSUE	Plasma cell	chr5	1221816	1225232	SLC6A19	5_1224405_A_G	28	37			65		CCLE_WGS	0.430769		0.756757
1722	ACH-000714	KMS11_HAEMATOPOIETIC_AND_LYMPHOID_TISSUE	Plasma cell	chr5	1208861	1209001	SLC6A19	5_1208964_T_C	12	10			22		CCLE_WGS	0.545455		1.2
1723	ACH-000714	KMS11_HAEMATOPOIETIC_AND_LYMPHOID_TISSUE	Plasma cell	chr5	1216673	1217060	SLC6A19	5_1216900_G_A	21	27			48		CCLE_WGS	0.4375		0.777778
1724	ACH-000714	KMS11_HAEMATOPOIETIC_AND_LYMPHOID_TISSUE	Plasma cell	chr5	1221816	1225232	SLC6A19	5_1223062_G_T	24	33			57		CCLE_WGS	0.421053		0.727273
1725	ACH-000714	KMS11_HAEMATOPOIETIC_AND_LYMPHOID_TISSUE	Plasma cell	chr5	1213578	1213688	SLC6A19	5_1213668_G_A	17	13			30		CCLE_WES	0.566667		1.30769
1726	ACH-000714	KMS11_HAEMATOPOIETIC_AND_LYMPHOID_TISSUE	Plasma cell	chr5	1216673	1217060	SLC6A19	5_1216900_G_A	57	52			109		CCLE_WES	0.522936		1.09615
1727	ACH-000714	KMS11_HAEMATOPOIETIC_AND_LYMPHOID_TISSUE	Plasma cell	chr5	1221816	1225232	SLC6A19	5_1225121_C_T	25	17			42		CCLE_WGS	0.595238		1.47059
1728	ACH-000714	KMS11_HAEMATOPOIETIC_AND_LYMPHOID_TISSUE	Plasma cell	chr5	1221816	1225232	SLC6A19	5_1224083_C_A	18	17			35		CCLE_WGS	0.514286		1.05882
1729	ACH-000714	KMS11_HAEMATOPOIETIC_AND_LYMPHOID_TISSUE	Plasma cell	chr5	1208861	1209001	SLC6A19	5_1208964_T_C	22	26			48		CCLE_WES	0.458333		0.846154
1730	ACH-000714	KMS11_HAEMATOPOIETIC_AND_LYMPHOID_TISSUE	Plasma cell	chr5	1221816	1225232	SLC6A19	5_1224003_C_T	31	10			41		CCLE_WGS	0.756098		3.1
1731	ACH-000715	SNU1214_UPPER_AERODIGESTIVE_TRACT	Upper aerodigestive	chr5	1216673	1217060	SLC6A19	5_1217004_G_A	73	80			153		CCLE_WES	0.477124		0.9125
1732	ACH-000715	SNU1214_UPPER_AERODIGESTIVE_TRACT	Upper aerodigestive	chr5	1212418	1212599	SLC6A19	5_1212494_C_T	51	50			101		CCLE_WES	0.50495		1.02
1733	ACH-000715	SNU1214_UPPER_AERODIGESTIVE_TRACT	Upper aerodigestive	chr5	1208861	1209001	SLC6A19	5_1208964_T_C	22	16			38		CCLE_WES	0.578947		1.375
1734	ACH-000719	RMGI_OVARY	Ovary	chr5	1221816	1225232	SLC6A19	5_1224003_C_T	25	11			36		CCLE_WGS	0.694444		2.27273
1735	ACH-000719	RMGI_OVARY	Ovary	chr5	1221816	1225232	SLC6A19	5_1223062_G_T	22	21			43		CCLE_WGS	0.511628		1.04762
1736	ACH-000719	RMGI_OVARY	Ovary	chr5	1221816	1225232	SLC6A19	5_1223700_C_T	20	12			32		CCLE_WGS	0.625		1.66667
1737	ACH-000719	RMGI_OVARY	Ovary	chr5	1221816	1225232	SLC6A19	5_1223772_T_C	27	18			45		CCLE_WGS	0.6		1.5
1738	ACH-000719	RMGI_OVARY	Ovary	chr5	1221816	1225232	SLC6A19	5_1223835_T_C	21	22			43		CCLE_WGS	0.488372		0.954545
1739	ACH-000719	RMGI_OVARY	Ovary	chr5	1221816	1225232	SLC6A19	5_1223940_A_G	21	8			29		CCLE_WGS	0.724138		2.625
1740	ACH-000719	RMGI_OVARY	Ovary	chr5	1221816	1225232	SLC6A19	5_1224405_A_G	21	18			39		CCLE_WGS	0.538462		1.16667
1741	ACH-000719	RMGI_OVARY	Ovary	chr5	1221816	1225232	SLC6A19	5_1224083_C_A	15	14			29		CCLE_WGS	0.517241		1.07143
1742	ACH-000719	RMGI_OVARY	Ovary	chr5	1221816	1225232	SLC6A19	5_1224174_T_C	25	22			47		CCLE_WGS	0.531915		1.13636
1743	ACH-000719	RMGI_OVARY	Ovary	chr5	1221816	1225232	SLC6A19	5_1224285_G_A	12	18			30		CCLE_WGS	0.4		0.666667
1744	ACH-000719	RMGI_OVARY	Ovary	chr5	1221816	1225232	SLC6A19	5_1225121_C_T	18	19			37		CCLE_WGS	0.486486		0.947368
1745	ACH-000723	YD10B_UPPER_AERODIGESTIVE_TRACT	Upper aerodigestive	chr5	1216673	1217060	SLC6A19	5_1216775_A_G	49	29			78		CCLE_WES	0.628205		1.68966
1746	ACH-000723	YD10B_UPPER_AERODIGESTIVE_TRACT	Upper aerodigestive	chr5	1212418	1212599	SLC6A19	5_1212494_C_T	44	65			109		CCLE_WES	0.40367		0.676923
1747	ACH-000724	HT1376_URINARY_TRACT	Urinary tract	chr5	1221816	1225232	SLC6A19	5_1224405_A_G	20	54			74		CCLE_WGS	0.27027		0.37037
1748	ACH-000724	HT1376_URINARY_TRACT	Urinary tract	chr5	1221816	1225232	SLC6A19	5_1225121_C_T	58	23			81		CCLE_WGS	0.716049		2.52174
1749	ACH-000724	HT1376_URINARY_TRACT	Urinary tract	chr5	1221816	1225232	SLC6A19	5_1222370_C_T	13	43			56		CCLE_WGS	0.232143		0.302326
1750	ACH-000724	HT1376_URINARY_TRACT	Urinary tract	chr5	1221816	1225232	SLC6A19	5_1223062_G_T	15	43			58		CCLE_WGS	0.258621		0.348837
1751	ACH-000724	HT1376_URINARY_TRACT	Urinary tract	chr5	1221816	1225232	SLC6A19	5_1223835_T_C	43	29			72		CCLE_WGS	0.597222		1.48276
1752	ACH-000724	HT1376_URINARY_TRACT	Urinary tract	chr5	1221816	1225232	SLC6A19	5_1223772_T_C	61	62			123		CCLE_WGS	0.495935		0.983871
1753	ACH-000724	HT1376_URINARY_TRACT	Urinary tract	chr5	1221816	1225232	SLC6A19	5_1223940_A_G	47	19			66		CCLE_WGS	0.712121		2.47368
1754	ACH-000724	HT1376_URINARY_TRACT	Urinary tract	chr5	1221816	1225232	SLC6A19	5_1224003_C_T	43	11			54		CCLE_WGS	0.796296		3.90909
1755	ACH-000724	HT1376_URINARY_TRACT	Urinary tract	chr5	1221816	1225232	SLC6A19	5_1224083_C_A	16	39			55		CCLE_WGS	0.290909		0.410256
1756	ACH-000724	HT1376_URINARY_TRACT	Urinary tract	chr5	1221816	1225232	SLC6A19	5_1224174_T_C	26	55			81		CCLE_WGS	0.320988		0.472727
1757	ACH-000724	HT1376_URINARY_TRACT	Urinary tract	chr5	1221816	1225232	SLC6A19	5_1224285_G_A	22	36			58		CCLE_WGS	0.37931		0.611111
1758	ACH-000724	HT1376_URINARY_TRACT	Urinary tract	chr5	1221816	1225232	SLC6A19	5_1223730_G_A	95	21			116		CCLE_WGS	0.818966		4.52381
1759	ACH-000725	HCC202_BREAST	Breast	chr5	1221816	1225232	SLC6A19	5_1224003_C_T	31	14			45		CCLE_WGS	0.688889		2.21429
1760	ACH-000725	HCC202_BREAST	Breast	chr5	1221816	1225232	SLC6A19	5_1223062_G_T	19	32			51		CCLE_WGS	0.372549		0.59375
1761	ACH-000725	HCC202_BREAST	Breast	chr5	1221816	1225232	SLC6A19	5_1223730_G_A	40	25			65		CCLE_WGS	0.615385		1.6
1762	ACH-000725	HCC202_BREAST	Breast	chr5	1221816	1225232	SLC6A19	5_1223835_T_C	26	21			47		CCLE_WGS	0.553191		1.2381
1763	ACH-000725	HCC202_BREAST	Breast	chr5	1221816	1225232	SLC6A19	5_1223940_A_G	24	14			38		CCLE_WGS	0.631579		1.71429
1764	ACH-000725	HCC202_BREAST	Breast	chr5	1221816	1225232	SLC6A19	5_1225121_C_T	46	14			60		CCLE_WGS	0.766667		3.28571
1765	ACH-000725	HCC202_BREAST	Breast	chr5	1221816	1225232	SLC6A19	5_1224174_T_C	12	38			50		CCLE_WGS	0.24		0.315789
1766	ACH-000725	HCC202_BREAST	Breast	chr5	1221816	1225232	SLC6A19	5_1223772_T_C	50	16			66		CCLE_WGS	0.757576		3.125
1767	ACH-000725	HCC202_BREAST	Breast	chr5	1221816	1225232	SLC6A19	5_1224405_A_G	19	30			49		CCLE_WGS	0.387755		0.633333
1768	ACH-000725	HCC202_BREAST	Breast	chr5	1221816	1225232	SLC6A19	5_1224083_C_A	18	22			40		CCLE_WGS	0.45		0.818182
1769	ACH-000725	HCC202_BREAST	Breast	chr5	1221816	1225232	SLC6A19	5_1224285_G_A	14	28			42		CCLE_WGS	0.333333		0.5
1770	ACH-000727	NCIH2066_LUNG	Lung	chr5	1208861	1209001	SLC6A19	5_1208964_T_C	36	24			60		CCLE_WGS	0.6		1.5
1771	ACH-000727	NCIH2066_LUNG	Lung	chr5	1221816	1225232	SLC6A19	5_1223730_G_A	19	76			95		CCLE_WGS	0.2		0.25
1772	ACH-000727	NCIH2066_LUNG	Lung	chr5	1221816	1225232	SLC6A19	5_1223700_C_T	71	32			103		CCLE_WGS	0.68932		2.21875
1773	ACH-000728	KASUMI2_HAEMATOPOIETIC_AND_LYMPHOID_TISSUE	Blood	chr5	1216673	1217060	SLC6A19	5_1216775_A_G	28	24			52		CCLE_WES	0.538462		1.16667
1774	ACH-000729	NCIH1963_LUNG	Lung	chr5	1221816	1225232	SLC6A19	5_1223730_G_A	59	31			90		CCLE_WGS	0.655556		1.90323
1775	ACH-000729	NCIH1963_LUNG	Lung	chr5	1221816	1225232	SLC6A19	5_1224083_C_A	23	19			42		CCLE_WGS	0.547619		1.21053
1776	ACH-000729	NCIH1963_LUNG	Lung	chr5	1221816	1225232	SLC6A19	5_1223786_T_C	60	19			79		CCLE_WGS	0.759494		3.15789
1777	ACH-000729	NCIH1963_LUNG	Lung	chr5	1221816	1225232	SLC6A19	5_1223062_G_T	25	13			38		CCLE_WGS	0.657895		1.92308
1778	ACH-000729	NCIH1963_LUNG	Lung	chr5	1221816	1225232	SLC6A19	5_1223835_T_C	42	10			52		CCLE_WGS	0.807692		4.2
1779	ACH-000729	NCIH1963_LUNG	Lung	chr5	1221816	1225232	SLC6A19	5_1223940_A_G	20	18			38		CCLE_WGS	0.526316		1.11111
1780	ACH-000729	NCIH1963_LUNG	Lung	chr5	1221816	1225232	SLC6A19	5_1224001_T_C	17	20			37		CCLE_WGS	0.459459		0.85
1781	ACH-000729	NCIH1963_LUNG	Lung	chr5	1221816	1225232	SLC6A19	5_1223772_T_C	62	29			91		CCLE_WGS	0.681319		2.13793
1782	ACH-000729	NCIH1963_LUNG	Lung	chr5	1221816	1225232	SLC6A19	5_1224571_C_T	21	19			40		CCLE_WGS	0.525		1.10526
1783	ACH-000729	NCIH1963_LUNG	Lung	chr5	1221816	1225232	SLC6A19	5_1224795_G_C	21	21			42		CCLE_WGS	0.5		1
1784	ACH-000729	NCIH1963_LUNG	Lung	chr5	1216673	1217060	SLC6A19	5_1216900_G_A	22	16			38		CCLE_WGS	0.578947		1.375
1785	ACH-000729	NCIH1963_LUNG	Lung	chr5	1221816	1225232	SLC6A19	5_1224405_A_G	19	30			49		CCLE_WGS	0.387755		0.633333
1786	ACH-000729	NCIH1963_LUNG	Lung	chr5	1221816	1225232	SLC6A19	5_1224174_T_C	13	26			39		CCLE_WGS	0.333333		0.5
1787	ACH-000729	NCIH1963_LUNG	Lung	chr5	1221816	1225232	SLC6A19	5_1224285_G_A	19	21			40		CCLE_WGS	0.475		0.904762
1788	ACH-000729	NCIH1963_LUNG	Lung	chr5	1216673	1217060	SLC6A19	5_1216751_C_T	26	29			55		CCLE_WGS	0.472727		0.896552
1789	ACH-000730	SKMEL5_SKIN	Skin	chr5	1221816	1225232	SLC6A19	5_1224285_G_A	22	24			46		CCLE_WGS	0.478261		0.916667
1790	ACH-000730	SKMEL5_SKIN	Skin	chr5	1221816	1225232	SLC6A19	5_1224174_T_C	34	42			76		CCLE_WGS	0.447368		0.809524
1791	ACH-000730	SKMEL5_SKIN	Skin	chr5	1221816	1225232	SLC6A19	5_1224083_C_A	18	27			45		CCLE_WGS	0.4		0.666667
1792	ACH-000730	SKMEL5_SKIN	Skin	chr5	1221816	1225232	SLC6A19	5_1225121_C_T	35	19			54		CCLE_WGS	0.648148		1.84211
1793	ACH-000730	SKMEL5_SKIN	Skin	chr5	1221816	1225232	SLC6A19	5_1223940_A_G	41	17			58		CCLE_WGS	0.706897		2.41176
1794	ACH-000730	SKMEL5_SKIN	Skin	chr5	1221816	1225232	SLC6A19	5_1224405_A_G	20	37			57		CCLE_WGS	0.350877		0.540541
1795	ACH-000730	SKMEL5_SKIN	Skin	chr5	1221816	1225232	SLC6A19	5_1223835_T_C	27	21			48		CCLE_WGS	0.5625		1.28571
1796	ACH-000730	SKMEL5_SKIN	Skin	chr5	1221816	1225232	SLC6A19	5_1223062_G_T	20	32			52		CCLE_WGS	0.384615		0.625
1797	ACH-000730	SKMEL5_SKIN	Skin	chr5	1221816	1225232	SLC6A19	5_1223772_T_C	44	22			66		CCLE_WGS	0.666667		2
1798	ACH-000730	SKMEL5_SKIN	Skin	chr5	1221816	1225232	SLC6A19	5_1223730_G_A	38	21			59		CCLE_WGS	0.644068		1.80952
1799	ACH-000730	SKMEL5_SKIN	Skin	chr5	1221816	1225232	SLC6A19	5_1224003_C_T	27	18			45		CCLE_WGS	0.6		1.5
1800	ACH-000732	PECAPJ41CLONED2_UPPER_AERODIGESTIVE_TRACT	Upper aerodigestive	chr5	1213578	1213688	SLC6A19	5_1213668_G_A	18	12			30		CCLE_WES	0.6		1.5
1801	ACH-000735	PECAPJ49_UPPER_AERODIGESTIVE_TRACT	Upper aerodigestive	chr5	1213578	1213688	SLC6A19	5_1213668_G_A	12	53			65		CCLE_WES	0.184615		0.226415
1802	ACH-000735	PECAPJ49_UPPER_AERODIGESTIVE_TRACT	Upper aerodigestive	chr5	1216673	1217060	SLC6A19	5_1216900_G_A	41	124			165		CCLE_WES	0.248485		0.330645
1803	ACH-000735	PECAPJ49_UPPER_AERODIGESTIVE_TRACT	Upper aerodigestive	chr5	1208861	1209001	SLC6A19	5_1208964_T_C	20	55			75		CCLE_WES	0.266667		0.363636
1804	ACH-000736	SNU601_STOMACH	Gastric	chr5	1216673	1217060	SLC6A19	5_1216900_G_A	48	68			116		CCLE_WES	0.413793		0.705882
1805	ACH-000738	GB1_CENTRAL_NERVOUS_SYSTEM	Central nervous system	chr5	1221816	1225232	SLC6A19	5_1224083_C_A	25	26			51		CCLE_WGS	0.490196		0.961538
1806	ACH-000738	GB1_CENTRAL_NERVOUS_SYSTEM	Central nervous system	chr5	1208861	1209001	SLC6A19	5_1208964_T_C	25	11			36		CCLE_WGS	0.694444		2.27273
1807	ACH-000738	GB1_CENTRAL_NERVOUS_SYSTEM	Central nervous system	chr5	1221816	1225232	SLC6A19	5_1223772_T_C	43	58			101		CCLE_WGS	0.425743		0.741379
1808	ACH-000739	HEPG2_LIVER	Liver	chr5	1221816	1225232	SLC6A19	5_1224174_T_C	16	21			37		CCLE_WGS	0.432432		0.761905
1809	ACH-000739	HEPG2_LIVER	Liver	chr5	1216673	1217060	SLC6A19	5_1216775_A_G	27	24			51		CCLE_WGS	0.529412		1.125
1810	ACH-000739	HEPG2_LIVER	Liver	chr5	1221816	1225232	SLC6A19	5_1223062_G_T	22	17			39		CCLE_WGS	0.564103		1.29412
1811	ACH-000739	HEPG2_LIVER	Liver	chr5	1221816	1225232	SLC6A19	5_1223602_C_T	16	21			37		CCLE_WGS	0.432432		0.761905
1812	ACH-000739	HEPG2_LIVER	Liver	chr5	1221816	1225232	SLC6A19	5_1223772_T_C	42	13			55		CCLE_WGS	0.763636		3.23077
1813	ACH-000739	HEPG2_LIVER	Liver	chr5	1221816	1225232	SLC6A19	5_1224795_G_C	20	20			40		CCLE_WGS	0.5		1
1814	ACH-000739	HEPG2_LIVER	Liver	chr5	1221816	1225232	SLC6A19	5_1224490_G_T	22	20			42		CCLE_WGS	0.52381		1.1
1815	ACH-000739	HEPG2_LIVER	Liver	chr5	1221816	1225232	SLC6A19	5_1224405_A_G	20	16			36		CCLE_WGS	0.555556		1.25
1816	ACH-000739	HEPG2_LIVER	Liver	chr5	1221816	1225232	SLC6A19	5_1224285_G_A	20	20			40		CCLE_WGS	0.5		1
1817	ACH-000739	HEPG2_LIVER	Liver	chr5	1221816	1225232	SLC6A19	5_1224083_C_A	11	10			21		CCLE_WGS	0.52381		1.1
1818	ACH-000739	HEPG2_LIVER	Liver	chr5	1221816	1225232	SLC6A19	5_1224051_C_T	16	11			27		CCLE_WGS	0.592593		1.45455
1819	ACH-000739	HEPG2_LIVER	Liver	chr5	1221816	1225232	SLC6A19	5_1224001_T_C	16	20			36		CCLE_WGS	0.444444		0.8
1820	ACH-000741	UBLC1_URINARY_TRACT	Urinary tract	chr5	1216673	1217060	SLC6A19	5_1216900_G_A	27	49			76		CCLE_WES	0.355263		0.55102
1821	ACH-000741	UBLC1_URINARY_TRACT	Urinary tract	chr5	1216673	1217060	SLC6A19	5_1216775_A_G	85	57			142		CCLE_WES	0.598592		1.49123
1822	ACH-000743	CORL95_LUNG	Lung	chr5	1208861	1209001	SLC6A19	5_1208964_T_C	33	47			80		CCLE_WES	0.4125		0.702128
1823	ACH-000745	MOLP8_HAEMATOPOIETIC_AND_LYMPHOID_TISSUE	Plasma cell	chr5	1213578	1213688	SLC6A19	5_1213668_G_A	16	13			29		CCLE_WES	0.551724		1.23077
1824	ACH-000746	GSS_STOMACH	Gastric	chr5	1208861	1209001	SLC6A19	5_1208964_T_C	41	39			80		CCLE_WES	0.5125		1.05128
1825	ACH-000747	NCIH1703_LUNG	Lung	chr5	1221816	1225232	SLC6A19	5_1224559_G_C	33	51			84		CCLE_WGS	0.392857		0.647059
1826	ACH-000747	NCIH1703_LUNG	Lung	chr5	1208861	1209001	SLC6A19	5_1208964_T_C	41	19			60		CCLE_WGS	0.683333		2.15789
1827	ACH-000749	DMS273_LUNG	Lung	chr5	1208861	1209001	SLC6A19	5_1208964_T_C	15	13			28		CCLE_WGS	0.535714		1.15385
1828	ACH-000749	DMS273_LUNG	Lung	chr5	1213578	1213688	SLC6A19	5_1213668_G_A	14	15			29		CCLE_WGS	0.482759		0.933333
1829	ACH-000749	DMS273_LUNG	Lung	chr5	1216673	1217060	SLC6A19	5_1216900_G_A	19	28			47		CCLE_WGS	0.404255		0.678571
1830	ACH-000749	DMS273_LUNG	Lung	chr5	1221816	1225232	SLC6A19	5_1223874_A_G	22	9			31		CCLE_WGS	0.709677		2.44444
1831	ACH-000749	DMS273_LUNG	Lung	chr5	1221816	1225232	SLC6A19	5_1222480_C_T	24	34			58		CCLE_WGS	0.413793		0.705882
1832	ACH-000749	DMS273_LUNG	Lung	chr5	1221816	1225232	SLC6A19	5_1222667_G_A	14	32			46		CCLE_WGS	0.304348		0.4375
1833	ACH-000749	DMS273_LUNG	Lung	chr5	1221816	1225232	SLC6A19	5_1224083_C_A	29	18			47		CCLE_WGS	0.617021		1.61111
1834	ACH-000749	DMS273_LUNG	Lung	chr5	1221816	1225232	SLC6A19	5_1223701_G_A	54	10			64		CCLE_WGS	0.84375		5.4
1835	ACH-000749	DMS273_LUNG	Lung	chr5	1221816	1225232	SLC6A19	5_1224285_G_A	25	17			42		CCLE_WGS	0.595238		1.47059
1836	ACH-000749	DMS273_LUNG	Lung	chr5	1221816	1225232	SLC6A19	5_1224795_G_C	38	22			60		CCLE_WGS	0.633333		1.72727
1837	ACH-000749	DMS273_LUNG	Lung	chr5	1221816	1225232	SLC6A19	5_1223773_G_A	66	12			78		CCLE_WGS	0.846154		5.5
1838	ACH-000749	DMS273_LUNG	Lung	chr5	1221816	1225232	SLC6A19	5_1223772_T_C	33	44			77		CCLE_WGS	0.428571		0.75
1839	ACH-000749	DMS273_LUNG	Lung	chr5	1221816	1225232	SLC6A19	5_1223062_G_T	26	23			49		CCLE_WGS	0.530612		1.13043
1840	ACH-000749	DMS273_LUNG	Lung	chr5	1221816	1225232	SLC6A19	5_1224174_T_C	31	16			47		CCLE_WGS	0.659574		1.9375
1841	ACH-000750	LOXIMVI_SKIN	Skin	chr5	1221816	1225232	SLC6A19	5_1224405_A_G	15	27			42		CCLE_WGS	0.357143		0.555556
1842	ACH-000750	LOXIMVI_SKIN	Skin	chr5	1221816	1225232	SLC6A19	5_1223730_G_A	57	20			77		CCLE_WGS	0.74026		2.85
1843	ACH-000750	LOXIMVI_SKIN	Skin	chr5	1221816	1225232	SLC6A19	5_1223062_G_T	18	22			40		CCLE_WGS	0.45		0.818182
1844	ACH-000750	LOXIMVI_SKIN	Skin	chr5	1221816	1225232	SLC6A19	5_1225121_C_T	17	10			27		CCLE_WGS	0.62963		1.7
1845	ACH-000750	LOXIMVI_SKIN	Skin	chr5	1221816	1225232	SLC6A19	5_1223772_T_C	38	41			79		CCLE_WGS	0.481013		0.926829
1846	ACH-000750	LOXIMVI_SKIN	Skin	chr5	1221816	1225232	SLC6A19	5_1224003_C_T	20	11			31		CCLE_WGS	0.645161		1.81818
1847	ACH-000750	LOXIMVI_SKIN	Skin	chr5	1221816	1225232	SLC6A19	5_1224083_C_A	17	15			32		CCLE_WGS	0.53125		1.13333
1848	ACH-000750	LOXIMVI_SKIN	Skin	chr5	1221816	1225232	SLC6A19	5_1224174_T_C	13	25			38		CCLE_WGS	0.342105		0.52
1849	ACH-000750	LOXIMVI_SKIN	Skin	chr5	1221816	1225232	SLC6A19	5_1224285_G_A	15	29			44		CCLE_WGS	0.340909		0.517241
1850	ACH-000750	LOXIMVI_SKIN	Skin	chr5	1221816	1225232	SLC6A19	5_1223835_T_C	15	14			29		CCLE_WGS	0.517241		1.07143
1851	ACH-000750	LOXIMVI_SKIN	Skin	chr5	1221816	1225232	SLC6A19	5_1223940_A_G	24	15			39		CCLE_WGS	0.615385		1.6
1852	ACH-000751	OCIM1_HAEMATOPOIETIC_AND_LYMPHOID_TISSUE	Blood	chr5	1216673	1217060	SLC6A19	5_1216900_G_A	37	55			92		CCLE_WES	0.402174		0.672727
1853	ACH-000752	NCIH196_LUNG	Lung	chr5	1216673	1217060	SLC6A19	5_1216775_A_G	88	46			134		CCLE_WGS	0.656716		1.91304
1854	ACH-000752	NCIH196_LUNG	Lung	chr5	1221816	1225232	SLC6A19	5_1223940_A_G	90	43			133		CCLE_WGS	0.676692		2.09302
1855	ACH-000752	NCIH196_LUNG	Lung	chr5	1221816	1225232	SLC6A19	5_1225121_C_T	78	78			156		CCLE_WGS	0.5		1
1856	ACH-000752	NCIH196_LUNG	Lung	chr5	1221816	1225232	SLC6A19	5_1224795_G_C	101	63			164		CCLE_WGS	0.615854		1.60317
1857	ACH-000752	NCIH196_LUNG	Lung	chr5	1221816	1225232	SLC6A19	5_1224490_G_T	71	69			140		CCLE_WGS	0.507143		1.02899
1858	ACH-000752	NCIH196_LUNG	Lung	chr5	1221816	1225232	SLC6A19	5_1224051_C_T	73	28			101		CCLE_WGS	0.722772		2.60714
1859	ACH-000752	NCIH196_LUNG	Lung	chr5	1221816	1225232	SLC6A19	5_1224003_C_T	81	18			99		CCLE_WGS	0.818182		4.5
1860	ACH-000752	NCIH196_LUNG	Lung	chr5	1221816	1225232	SLC6A19	5_1224001_T_C	80	17			97		CCLE_WGS	0.824742		4.70588
1861	ACH-000752	NCIH196_LUNG	Lung	chr5	1208861	1209001	SLC6A19	5_1208964_T_C	22	49			71		CCLE_WGS	0.309859		0.44898
1862	ACH-000752	NCIH196_LUNG	Lung	chr5	1221816	1225232	SLC6A19	5_1223835_T_C	88	34			122		CCLE_WGS	0.721311		2.58824
1863	ACH-000752	NCIH196_LUNG	Lung	chr5	1221816	1225232	SLC6A19	5_1223730_G_A	87	53			140		CCLE_WGS	0.621429		1.64151
1864	ACH-000753	JMSU1_URINARY_TRACT	Urinary tract	chr5	1212418	1212599	SLC6A19	5_1212445_C_T	44	57			101		CCLE_WES	0.435644		0.77193
1865	ACH-000756	GI1_CENTRAL_NERVOUS_SYSTEM	Central nervous system	chr5	1216673	1217060	SLC6A19	5_1216900_G_A	49	22			71		CCLE_WGS	0.690141		2.22727
1866	ACH-000756	GI1_CENTRAL_NERVOUS_SYSTEM	Central nervous system	chr5	1221816	1225232	SLC6A19	5_1225106_C_T	29	58			87		CCLE_WGS	0.333333		0.5
1867	ACH-000756	GI1_CENTRAL_NERVOUS_SYSTEM	Central nervous system	chr5	1212418	1212599	SLC6A19	5_1212445_C_T	27	70			97		CCLE_WGS	0.278351		0.385714
1868	ACH-000756	GI1_CENTRAL_NERVOUS_SYSTEM	Central nervous system	chr5	1208861	1209001	SLC6A19	5_1208964_T_C	44	15			59		CCLE_WGS	0.745763		2.93333
1869	ACH-000759	MDAMB175VII_BREAST	Breast	chr5	1221816	1225232	SLC6A19	5_1224405_A_G	16	28			44		CCLE_WGS	0.363636		0.571429
1870	ACH-000759	MDAMB175VII_BREAST	Breast	chr5	1221816	1225232	SLC6A19	5_1225121_C_T	23	14			37		CCLE_WGS	0.621622		1.64286
1871	ACH-000759	MDAMB175VII_BREAST	Breast	chr5	1221816	1225232	SLC6A19	5_1224285_G_A	20	19			39		CCLE_WGS	0.512821		1.05263
1872	ACH-000759	MDAMB175VII_BREAST	Breast	chr5	1221816	1225232	SLC6A19	5_1223940_A_G	13	18			31		CCLE_WGS	0.419355		0.722222
1873	ACH-000759	MDAMB175VII_BREAST	Breast	chr5	1221816	1225232	SLC6A19	5_1224083_C_A	17	22			39		CCLE_WGS	0.435897		0.772727
1874	ACH-000759	MDAMB175VII_BREAST	Breast	chr5	1201710	1201967	SLC6A19	5_1201758_C_T	9	19			28		CCLE_WGS	0.321429		0.473684
1875	ACH-000759	MDAMB175VII_BREAST	Breast	chr5	1221816	1225232	SLC6A19	5_1222988_C_T	16	17			33		CCLE_WGS	0.484848		0.941176
1876	ACH-000759	MDAMB175VII_BREAST	Breast	chr5	1221816	1225232	SLC6A19	5_1223062_G_T	24	19			43		CCLE_WGS	0.55814		1.26316
1877	ACH-000759	MDAMB175VII_BREAST	Breast	chr5	1221816	1225232	SLC6A19	5_1223730_G_A	40	17			57		CCLE_WGS	0.701754		2.35294
1878	ACH-000759	MDAMB175VII_BREAST	Breast	chr5	1221816	1225232	SLC6A19	5_1223772_T_C	35	25			60		CCLE_WGS	0.583333		1.4
1879	ACH-000759	MDAMB175VII_BREAST	Breast	chr5	1221816	1225232	SLC6A19	5_1223835_T_C	15	24			39		CCLE_WGS	0.384615		0.625
1880	ACH-000759	MDAMB175VII_BREAST	Breast	chr5	1221816	1225232	SLC6A19	5_1224003_C_T	19	14			33		CCLE_WGS	0.575758		1.35714
1881	ACH-000759	MDAMB175VII_BREAST	Breast	chr5	1221816	1225232	SLC6A19	5_1224174_T_C	13	26			39		CCLE_WGS	0.333333		0.5
1882	ACH-000761	NUGC2_STOMACH	Gastric	chr5	1213578	1213688	SLC6A19	5_1213668_G_A	49	24			73		CCLE_WES	0.671233		2.04167
1883	ACH-000761	NUGC2_STOMACH	Gastric	chr5	1216673	1217060	SLC6A19	5_1216775_A_G	43	86			129		CCLE_WES	0.333333		0.5
1884	ACH-000763	MM1S_HAEMATOPOIETIC_AND_LYMPHOID_TISSUE	Plasma cell	chr5	1221816	1225232	SLC6A19	5_1224405_A_G	31	24			55		CCLE_WGS	0.563636		1.29167
1885	ACH-000763	MM1S_HAEMATOPOIETIC_AND_LYMPHOID_TISSUE	Plasma cell	chr5	1221816	1225232	SLC6A19	5_1225121_C_T	20	28			48		CCLE_WGS	0.416667		0.714286
1886	ACH-000763	MM1S_HAEMATOPOIETIC_AND_LYMPHOID_TISSUE	Plasma cell	chr5	1221816	1225232	SLC6A19	5_1221851_G_A	29	26			55		CCLE_WES	0.527273		1.11538
1887	ACH-000763	MM1S_HAEMATOPOIETIC_AND_LYMPHOID_TISSUE	Plasma cell	chr5	1208861	1209001	SLC6A19	5_1208985_G_A	22	17			39		CCLE_WES	0.564103		1.29412
1888	ACH-000763	MM1S_HAEMATOPOIETIC_AND_LYMPHOID_TISSUE	Plasma cell	chr5	1208861	1209001	SLC6A19	5_1208964_T_C	22	20			42		CCLE_WES	0.52381		1.1
1889	ACH-000763	MM1S_HAEMATOPOIETIC_AND_LYMPHOID_TISSUE	Plasma cell	chr5	1221816	1225232	SLC6A19	5_1223940_A_G	26	19			45		CCLE_WGS	0.577778		1.36842
1890	ACH-000763	MM1S_HAEMATOPOIETIC_AND_LYMPHOID_TISSUE	Plasma cell	chr5	1221816	1225232	SLC6A19	5_1223835_T_C	18	25			43		CCLE_WGS	0.418605		0.72
1891	ACH-000763	MM1S_HAEMATOPOIETIC_AND_LYMPHOID_TISSUE	Plasma cell	chr5	1221816	1225232	SLC6A19	5_1224003_C_T	19	11			30		CCLE_WGS	0.633333		1.72727
1892	ACH-000763	MM1S_HAEMATOPOIETIC_AND_LYMPHOID_TISSUE	Plasma cell	chr5	1221816	1225232	SLC6A19	5_1223691_C_T	18	37			55		CCLE_WGS	0.327273		0.486486
1893	ACH-000763	MM1S_HAEMATOPOIETIC_AND_LYMPHOID_TISSUE	Plasma cell	chr5	1221816	1225232	SLC6A19	5_1222171_T_C	35	20			55		CCLE_WGS	0.636364		1.75
1894	ACH-000763	MM1S_HAEMATOPOIETIC_AND_LYMPHOID_TISSUE	Plasma cell	chr5	1221816	1225232	SLC6A19	5_1222220_G_A	19	32			51		CCLE_WGS	0.372549		0.59375
1895	ACH-000763	MM1S_HAEMATOPOIETIC_AND_LYMPHOID_TISSUE	Plasma cell	chr5	1221816	1225232	SLC6A19	5_1221851_G_A	22	16			38		CCLE_WGS	0.578947		1.375
1896	ACH-000763	MM1S_HAEMATOPOIETIC_AND_LYMPHOID_TISSUE	Plasma cell	chr5	1221816	1225232	SLC6A19	5_1223802_G_A	22	16			38		CCLE_WGS	0.578947		1.375
1897	ACH-000763	MM1S_HAEMATOPOIETIC_AND_LYMPHOID_TISSUE	Plasma cell	chr5	1221816	1225232	SLC6A19	5_1223500_G_C	14	26			40		CCLE_WGS	0.35		0.538462
1898	ACH-000763	MM1S_HAEMATOPOIETIC_AND_LYMPHOID_TISSUE	Plasma cell	chr5	1208861	1209001	SLC6A19	5_1208985_G_A	19	11			30		CCLE_WGS	0.633333		1.72727
1899	ACH-000767	NCIH526_LUNG	Lung	chr5	1221816	1225232	SLC6A19	5_1225121_C_T	38	20			58		CCLE_WGS	0.655172		1.9
1900	ACH-000767	NCIH526_LUNG	Lung	chr5	1221816	1225232	SLC6A19	5_1224001_T_C	30	12			42		CCLE_WGS	0.714286		2.5
1901	ACH-000767	NCIH526_LUNG	Lung	chr5	1221816	1225232	SLC6A19	5_1223940_A_G	28	13			41		CCLE_WGS	0.682927		2.15385
1902	ACH-000767	NCIH526_LUNG	Lung	chr5	1221816	1225232	SLC6A19	5_1224003_C_T	30	12			42		CCLE_WGS	0.714286		2.5
1903	ACH-000767	NCIH526_LUNG	Lung	chr5	1221816	1225232	SLC6A19	5_1223730_G_A	37	23			60		CCLE_WGS	0.616667		1.6087
1904	ACH-000767	NCIH526_LUNG	Lung	chr5	1221816	1225232	SLC6A19	5_1223384_G_A	24	42			66		CCLE_WGS	0.363636		0.571429
1905	ACH-000767	NCIH526_LUNG	Lung	chr5	1208861	1209001	SLC6A19	5_1208964_T_C	8	16			24		CCLE_WGS	0.333333		0.5
1906	ACH-000767	NCIH526_LUNG	Lung	chr5	1216673	1217060	SLC6A19	5_1216900_G_A	15	29			44		CCLE_WGS	0.340909		0.517241
1907	ACH-000767	NCIH526_LUNG	Lung	chr5	1221816	1225232	SLC6A19	5_1222499_T_C	15	24			39		CCLE_WGS	0.384615		0.625
1908	ACH-000767	NCIH526_LUNG	Lung	chr5	1221816	1225232	SLC6A19	5_1223845_A_G	20	37			57		CCLE_WGS	0.350877		0.540541
1909	ACH-000767	NCIH526_LUNG	Lung	chr5	1221816	1225232	SLC6A19	5_1223835_T_C	34	18			52		CCLE_WGS	0.653846		1.88889
1910	ACH-000768	MDAMB231_BREAST	Breast	chr5	1221816	1225232	SLC6A19	5_1223802_G_A	29	36			65		CCLE_WGS	0.446154		0.805556
1911	ACH-000768	MDAMB231_BREAST	Breast	chr5	1221816	1225232	SLC6A19	5_1223835_T_C	28	25			53		CCLE_WGS	0.528302		1.12
1912	ACH-000768	MDAMB231_BREAST	Breast	chr5	1216673	1217060	SLC6A19	5_1216775_A_G	25	21			46		CCLE_WGS	0.543478		1.19048
1913	ACH-000768	MDAMB231_BREAST	Breast	chr5	1221816	1225232	SLC6A19	5_1223730_G_A	33	25			58		CCLE_WGS	0.568966		1.32
1914	ACH-000768	MDAMB231_BREAST	Breast	chr5	1221816	1225232	SLC6A19	5_1223940_A_G	32	17			49		CCLE_WGS	0.653061		1.88235
1915	ACH-000768	MDAMB231_BREAST	Breast	chr5	1221816	1225232	SLC6A19	5_1224001_T_C	29	14			43		CCLE_WGS	0.674419		2.07143
1916	ACH-000768	MDAMB231_BREAST	Breast	chr5	1221816	1225232	SLC6A19	5_1224003_C_T	31	14			45		CCLE_WGS	0.688889		2.21429
1917	ACH-000768	MDAMB231_BREAST	Breast	chr5	1221816	1225232	SLC6A19	5_1224051_C_T	29	22			51		CCLE_WGS	0.568627		1.31818
1918	ACH-000768	MDAMB231_BREAST	Breast	chr5	1221816	1225232	SLC6A19	5_1224490_G_T	34	25			59		CCLE_WGS	0.576271		1.36
1919	ACH-000768	MDAMB231_BREAST	Breast	chr5	1221816	1225232	SLC6A19	5_1225121_C_T	31	27			58		CCLE_WGS	0.534483		1.14815
1920	ACH-000768	MDAMB231_BREAST	Breast	chr5	1221816	1225232	SLC6A19	5_1224795_G_C	36	27			63		CCLE_WGS	0.571429		1.33333
1921	ACH-000771	BICR56_UPPER_AERODIGESTIVE_TRACT	Upper aerodigestive	chr5	1208861	1209001	SLC6A19	5_1208964_T_C	24	18			42		CCLE_WES	0.571429		1.33333
1922	ACH-000776	ONS76_CENTRAL_NERVOUS_SYSTEM	Central nervous system	chr5	1216673	1217060	SLC6A19	5_1216900_G_A	22	14			36		CCLE_WGS	0.611111		1.57143
1923	ACH-000776	ONS76_CENTRAL_NERVOUS_SYSTEM	Central nervous system	chr5	1216673	1217060	SLC6A19	5_1216775_A_G	42	36			78		CCLE_WGS	0.538462		1.16667
1924	ACH-000777	KYSE30_OESOPHAGUS	Esophagus	chr5	1221816	1225232	SLC6A19	5_1223772_T_C	31	53			84		CCLE_WGS	0.369048		0.584906
1925	ACH-000778	HSC3_UPPER_AERODIGESTIVE_TRACT	Upper aerodigestive	chr5	1221816	1225232	SLC6A19	5_1223730_G_A	15	47			62		CCLE_WGS	0.241935		0.319149
1926	ACH-000778	HSC3_UPPER_AERODIGESTIVE_TRACT	Upper aerodigestive	chr5	1221816	1225232	SLC6A19	5_1223700_C_T	37	24			61		CCLE_WGS	0.606557		1.54167
1927	ACH-000778	HSC3_UPPER_AERODIGESTIVE_TRACT	Upper aerodigestive	chr5	1221816	1225232	SLC6A19	5_1223555_C_T	37	39			76		CCLE_WGS	0.486842		0.948718
1928	ACH-000780	NCIH1105_LUNG	Lung	chr5	1216673	1217060	SLC6A19	5_1216900_G_A	26	21			47		CCLE_WGS	0.553191		1.2381
1929	ACH-000780	NCIH1105_LUNG	Lung	chr5	1221816	1225232	SLC6A19	5_1225121_C_T	23	25			48		CCLE_WGS	0.479167		0.92
1930	ACH-000780	NCIH1105_LUNG	Lung	chr5	1221816	1225232	SLC6A19	5_1224003_C_T	14	12			26		CCLE_WGS	0.538462		1.16667
1931	ACH-000780	NCIH1105_LUNG	Lung	chr5	1208861	1209001	SLC6A19	5_1208964_T_C	15	12			27		CCLE_WGS	0.555556		1.25
1932	ACH-000780	NCIH1105_LUNG	Lung	chr5	1221816	1225232	SLC6A19	5_1223940_A_G	21	21			42		CCLE_WGS	0.5		1
1933	ACH-000780	NCIH1105_LUNG	Lung	chr5	1221816	1225232	SLC6A19	5_1223845_A_G	32	22			54		CCLE_WGS	0.592593		1.45455
1934	ACH-000780	NCIH1105_LUNG	Lung	chr5	1221816	1225232	SLC6A19	5_1223835_T_C	19	28			47		CCLE_WGS	0.404255		0.678571
1935	ACH-000780	NCIH1105_LUNG	Lung	chr5	1221816	1225232	SLC6A19	5_1223730_G_A	31	25			56		CCLE_WGS	0.553571		1.24
1936	ACH-000780	NCIH1105_LUNG	Lung	chr5	1221816	1225232	SLC6A19	5_1224001_T_C	14	11			25		CCLE_WGS	0.56		1.27273
1937	ACH-000780	NCIH1105_LUNG	Lung	chr5	1221816	1225232	SLC6A19	5_1222499_T_C	25	27			52		CCLE_WGS	0.480769		0.925926
1938	ACH-000782	SEM_HAEMATOPOIETIC_AND_LYMPHOID_TISSUE	Blood	chr5	1213578	1213688	SLC6A19	5_1213668_G_A	16	21			37		CCLE_WES	0.432432		0.761905
1939	ACH-000783	CAMA1_BREAST	Breast	chr5	1221816	1225232	SLC6A19	5_1223730_G_A	42	21			63		CCLE_WGS	0.666667		2
1940	ACH-000783	CAMA1_BREAST	Breast	chr5	1221816	1225232	SLC6A19	5_1224174_T_C	18	13			31		CCLE_WGS	0.580645		1.38462
1941	ACH-000783	CAMA1_BREAST	Breast	chr5	1221816	1225232	SLC6A19	5_1224285_G_A	23	10			33		CCLE_WGS	0.69697		2.3
1942	ACH-000783	CAMA1_BREAST	Breast	chr5	1221816	1225232	SLC6A19	5_1224405_A_G	24	23			47		CCLE_WGS	0.510638		1.04348
1943	ACH-000783	CAMA1_BREAST	Breast	chr5	1221816	1225232	SLC6A19	5_1225121_C_T	20	31			51		CCLE_WGS	0.392157		0.645161
1944	ACH-000783	CAMA1_BREAST	Breast	chr5	1221816	1225232	SLC6A19	5_1224083_C_A	24	17			41		CCLE_WGS	0.585366		1.41176
1945	ACH-000783	CAMA1_BREAST	Breast	chr5	1221816	1225232	SLC6A19	5_1223940_A_G	14	14			28		CCLE_WGS	0.5		1
1946	ACH-000783	CAMA1_BREAST	Breast	chr5	1221816	1225232	SLC6A19	5_1223835_T_C	19	23			42		CCLE_WGS	0.452381		0.826087
1947	ACH-000783	CAMA1_BREAST	Breast	chr5	1221816	1225232	SLC6A19	5_1223062_G_T	31	23			54		CCLE_WGS	0.574074		1.34783
1948	ACH-000784	KYSE70_OESOPHAGUS	Esophagus	chr5	1221816	1225232	SLC6A19	5_1223772_T_C	34	43			77		CCLE_WGS	0.441558		0.790698
1949	ACH-000788	A2058_SKIN	Skin	chr5	1221816	1225232	SLC6A19	5_1223772_T_C	42	49			91		CCLE_WGS	0.461538		0.857143
1950	ACH-000790	SHP77_LUNG	Lung	chr5	1216673	1217060	SLC6A19	5_1216900_G_A	35	61			96		CCLE_WGS	0.364583		0.57377
1951	ACH-000790	SHP77_LUNG	Lung	chr5	1221816	1225232	SLC6A19	5_1225121_C_T	57	34			91		CCLE_WGS	0.626374		1.67647
1952	ACH-000790	SHP77_LUNG	Lung	chr5	1221816	1225232	SLC6A19	5_1222499_T_C	35	62			97		CCLE_WGS	0.360825		0.564516
1953	ACH-000790	SHP77_LUNG	Lung	chr5	1213578	1213688	SLC6A19	5_1213668_G_A	22	39			61		CCLE_WGS	0.360656		0.564103
1954	ACH-000790	SHP77_LUNG	Lung	chr5	1221816	1225232	SLC6A19	5_1223700_C_T	68	14			82		CCLE_WGS	0.829268		4.85714
1955	ACH-000790	SHP77_LUNG	Lung	chr5	1221816	1225232	SLC6A19	5_1223940_A_G	65	27			92		CCLE_WGS	0.706522		2.40741
1956	ACH-000790	SHP77_LUNG	Lung	chr5	1221816	1225232	SLC6A19	5_1223845_A_G	34	73			107		CCLE_WGS	0.317757		0.465753
1957	ACH-000790	SHP77_LUNG	Lung	chr5	1221816	1225232	SLC6A19	5_1223835_T_C	73	30			103		CCLE_WGS	0.708738		2.43333
1958	ACH-000792	BFTC909_KIDNEY	Kidney	chr5	1221816	1225232	SLC6A19	5_1222798_G_A	14	22			36		CCLE_WGS	0.388889		0.636364
1959	ACH-000792	BFTC909_KIDNEY	Kidney	chr5	1221816	1225232	SLC6A19	5_1223772_T_C	28	20			48		CCLE_WGS	0.583333		1.4
1960	ACH-000792	BFTC909_KIDNEY	Kidney	chr5	1213578	1213688	SLC6A19	5_1213668_G_A	15	10			25		CCLE_WGS	0.6		1.5
1961	ACH-000792	BFTC909_KIDNEY	Kidney	chr5	1208861	1209001	SLC6A19	5_1208964_T_C	12	9			21		CCLE_WGS	0.571429		1.33333
1962	ACH-000792	BFTC909_KIDNEY	Kidney	chr5	1221816	1225232	SLC6A19	5_1223730_G_A	38	13			51		CCLE_WGS	0.745098		2.92308
1963	ACH-000792	BFTC909_KIDNEY	Kidney	chr5	1216673	1217060	SLC6A19	5_1216775_A_G	21	22			43		CCLE_WGS	0.488372		0.954545
1964	ACH-000792	BFTC909_KIDNEY	Kidney	chr5	1221816	1225232	SLC6A19	5_1223062_G_T	17	22			39		CCLE_WGS	0.435897		0.772727
1965	ACH-000792	BFTC909_KIDNEY	Kidney	chr5	1221816	1225232	SLC6A19	5_1223940_A_G	16	14			30		CCLE_WGS	0.533333		1.14286
1966	ACH-000792	BFTC909_KIDNEY	Kidney	chr5	1221816	1225232	SLC6A19	5_1224083_C_A	12	22			34		CCLE_WGS	0.352941		0.545455
1967	ACH-000792	BFTC909_KIDNEY	Kidney	chr5	1221816	1225232	SLC6A19	5_1224174_T_C	24	20			44		CCLE_WGS	0.545455		1.2
1968	ACH-000792	BFTC909_KIDNEY	Kidney	chr5	1221816	1225232	SLC6A19	5_1224285_G_A	14	29			43		CCLE_WGS	0.325581		0.482759
1969	ACH-000792	BFTC909_KIDNEY	Kidney	chr5	1221816	1225232	SLC6A19	5_1224405_A_G	20	24			44		CCLE_WGS	0.454545		0.833333
1970	ACH-000792	BFTC909_KIDNEY	Kidney	chr5	1221816	1225232	SLC6A19	5_1225121_C_T	21	20			41		CCLE_WGS	0.512195		1.05
1971	ACH-000792	BFTC909_KIDNEY	Kidney	chr5	1221816	1225232	SLC6A19	5_1223835_T_C	22	13			35		CCLE_WGS	0.628571		1.69231
1972	ACH-000793	KATOIII_STOMACH	Gastric	chr5	1213578	1213688	SLC6A19	5_1213668_G_A	24	12			36		CCLE_WGS	0.666667		2
1973	ACH-000793	KATOIII_STOMACH	Gastric	chr5	1221816	1225232	SLC6A19	5_1222798_G_A	14	33			47		CCLE_WGS	0.297872		0.424242
1974	ACH-000793	KATOIII_STOMACH	Gastric	chr5	1221816	1225232	SLC6A19	5_1222843_T_C	26	16			42		CCLE_WGS	0.619048		1.625
1975	ACH-000796	MCAS_OVARY	Ovary	chr5	1213578	1213688	SLC6A19	5_1213668_G_A	29	28			57		CCLE_WES	0.508772		1.03571
1976	ACH-000797	HLFA_FIBROBLAST	Fibroblast	chr5	1201710	1201967	SLC6A19	5_1201921_C_T	18	20			38		CCLE_WES	0.473684		0.9
1977	ACH-000797	HLFA_FIBROBLAST	Fibroblast	chr5	1213578	1213688	SLC6A19	5_1213668_G_A	16	13			29		CCLE_WES	0.551724		1.23077
1978	ACH-000797	HLFA_FIBROBLAST	Fibroblast	chr5	1216673	1217060	SLC6A19	5_1216900_G_A	52	41			93		CCLE_WES	0.55914		1.26829
1979	ACH-000798	CL40_LARGE_INTESTINE	Colorectal	chr5	1201710	1201967	SLC6A19	5_1201934_C_T	16	17			33		CCLE_WES	0.484848		0.941176
1980	ACH-000798	CL40_LARGE_INTESTINE	Colorectal	chr5	1208861	1209001	SLC6A19	5_1208964_T_C	23	18			41		CCLE_WES	0.560976		1.27778
1981	ACH-000800	NCIH446_LUNG	Lung	chr5	1216673	1217060	SLC6A19	5_1216900_G_A	18	42			60		CCLE_WGS	0.3		0.428571
1982	ACH-000800	NCIH446_LUNG	Lung	chr5	1221816	1225232	SLC6A19	5_1224285_G_A	63	15			78		CCLE_WGS	0.807692		4.2
1983	ACH-000800	NCIH446_LUNG	Lung	chr5	1221816	1225232	SLC6A19	5_1224174_T_C	71	26			97		CCLE_WGS	0.731959		2.73077
1984	ACH-000800	NCIH446_LUNG	Lung	chr5	1221816	1225232	SLC6A19	5_1223845_A_G	25	65			90		CCLE_WGS	0.277778		0.384615
1985	ACH-000800	NCIH446_LUNG	Lung	chr5	1221816	1225232	SLC6A19	5_1223772_T_C	91	27			118		CCLE_WGS	0.771186		3.37037
1986	ACH-000800	NCIH446_LUNG	Lung	chr5	1221816	1225232	SLC6A19	5_1223062_G_T	52	21			73		CCLE_WGS	0.712329		2.47619
1987	ACH-000800	NCIH446_LUNG	Lung	chr5	1221816	1225232	SLC6A19	5_1222499_T_C	39	69			108		CCLE_WGS	0.361111		0.565217
1988	ACH-000800	NCIH446_LUNG	Lung	chr5	1221816	1225232	SLC6A19	5_1224405_A_G	80	21			101		CCLE_WGS	0.792079		3.80952
1989	ACH-000800	NCIH446_LUNG	Lung	chr5	1221816	1225232	SLC6A19	5_1224083_C_A	68	15			83		CCLE_WGS	0.819277		4.53333
1990	ACH-000800	NCIH446_LUNG	Lung	chr5	1221816	1225232	SLC6A19	5_1224001_T_C	62	21			83		CCLE_WGS	0.746988		2.95238
1991	ACH-000803	COLO668_LUNG	Lung	chr5	1216673	1217060	SLC6A19	5_1216900_G_A	27	36			63		CCLE_WGS	0.428571		0.75
1992	ACH-000804	NB1_AUTONOMIC_GANGLIA	Peripheral nervous system	chr5	1212418	1212599	SLC6A19	5_1212494_C_T	42	50			92		CCLE_WES	0.456522		0.84
1993	ACH-000807	SNU738_CENTRAL_NERVOUS_SYSTEM	Central nervous system	chr5	1216673	1217060	SLC6A19	5_1216775_A_G	58	45			103		CCLE_WES	0.563107		1.28889
1994	ACH-000807	SNU738_CENTRAL_NERVOUS_SYSTEM	Central nervous system	chr5	1208861	1209001	SLC6A19	5_1208964_T_C	42	23			65		CCLE_WES	0.646154		1.82609
1995	ACH-000808	HUH28_BILIARY_TRACT	Bile duct	chr5	1213578	1213688	SLC6A19	5_1213668_G_A	27	42			69		CCLE_WES	0.391304		0.642857
1996	ACH-000808	HUH28_BILIARY_TRACT	Bile duct	chr5	1216673	1217060	SLC6A19	5_1216900_G_A	77	58			135		CCLE_WES	0.57037		1.32759
[truncated: 663 more rows]

## Sheet: SLC6A19_ASE
Supplementary Table S4d: ASE estimates for SLC6A19
Collapsed ASE calls for SLC6A19
Achilles_ID	CCLE_name	Disease	Exon_chromosome	Exon_start	Exon_end	Gene_name	SNP	DNA_ref_count	DNA_alt_count	RNA_ref_count	RNA_alt_count	DNA_total_count	RNA_total_count	DNA_source	DNA_ref_frac	RNA_ref_frac	DNA_ratio	RNA_ratio	RNA_DNA_foldchange	RNA_DNA_foldchange_pseudo	MAE
ACH-000982	GP2D_LARGE_INTESTINE	Colorectal	chr5	1212418	1212599	SLC6A19	5_1212561_T_C	13	20	115	138	33	253	CCLE_WGS	0.393939	0.454545	0.65	0.833333	1.28205	1.26635	0
ACH-000955	SNU407_LARGE_INTESTINE	Colorectal	chr5	1221816	1225232	SLC6A19	5_1223772_T_C	30	50	11	11	80	22	CCLE_WGS	0.375	0.5	0.6	1	1.66667	1.65574	0
ACH-000952	MDAPCA2B_PROSTATE	Prostate	chr5	1208861	1209001	SLC6A19	5_1208964_T_C	18	25	9	0	43	9	CCLE_WES	0.418605	1	0.72	inf	inf	26.1892	1
ACH-000908	SNU520_STOMACH	Gastric	chr5	1213578	1213688	SLC6A19	5_1213668_G_A	15	8	148	7	23	155	CCLE_WES	0.652174	0.954839	1.875	21.1429	11.2762	10.8581	1
ACH-000880	AGS_STOMACH	Gastric	chr5	1221816	1225232	SLC6A19	5_1223730_G_A	22	15	5	5	37	10	CCLE_WGS	0.594595	0.5	1.46667	1	0.681818	0.688889	0
ACH-000848	JHH7_LIVER	Liver	chr5	1221816	1225232	SLC6A19	5_1223772_T_C	115	92	4	7	207	11	CCLE_WGS	0.555556	0.363636	1.25	0.571429	0.457143	0.480519	0
ACH-000844	DMS454_LUNG	Lung	chr5	1208861	1209001	SLC6A19	5_1208964_T_C	49	29	7	2	78	9	CCLE_WES	0.628205	0.777778	1.68966	3.5	2.07143	1.78788	0
ACH-000679	OE19_OESOPHAGUS	Esophagus	chr5	1221816	1225232	SLC6A19	5_1223252_T_C	16	16	4	4	32	8	CCLE_WGS	0.5	0.5	1	1	1	1	0
ACH-000674	NUGC4_STOMACH	Gastric	chr5	1221816	1225232	SLC6A19	5_1223730_G_A	45	28	29	2	73	31	CCLE_WGS	0.616438	0.935484	1.60714	14.5	9.02222	7.39121	1
ACH-000633	FU97_STOMACH	Gastric	chr5	1221816	1225232	SLC6A19	5_1223835_T_C	13	95	11	46	108	57	CCLE_WGS	0.12037	0.192982	0.136842	0.23913	1.74749	1.7495	0
ACH-000625	HEP3B217_LIVER	Liver	chr5	1213578	1213688	SLC6A19	5_1213668_G_A	25	10	155	23	35	178	CCLE_WES	0.714286	0.870787	2.5	6.73913	2.69565	2.72466	0
ACH-000608	COV644_OVARY	Ovary	chr5	1221816	1225232	SLC6A19	5_1223772_T_C	55	30	9	10	85	19	CCLE_WGS	0.647059	0.473684	1.83333	0.9	0.490909	0.497211	0
ACH-000604	KYO1_HAEMATOPOIETIC_AND_LYMPHOID_TISSUE	Blood	chr5	1216673	1217060	SLC6A19	5_1216775_A_G	33	43	276	574	76	850	CCLE_WES	0.434211	0.324706	0.767442	0.480836	0.626544	0.624956	0
ACH-000602	M07E_HAEMATOPOIETIC_AND_LYMPHOID_TISSUE	Blood	chr5	1208861	1209001	SLC6A19	5_1208964_T_C	38	15	4	17	53	21	CCLE_WES	0.716981	0.190476	2.53333	0.235294	0.0928793	0.103525	1
ACH-000487	F36P_HAEMATOPOIETIC_AND_LYMPHOID_TISSUE	Blood	chr5	1213578	1213688	SLC6A19	5_1213668_G_A	23	12	45	25	35	70	CCLE_WES	0.657143	0.642857	1.91667	1.8	0.93913	0.949103	0
ACH-000471	LI7_LIVER	Liver	chr5	1216673	1217060	SLC6A19	5_1216775_A_G	55	94	133	272	149	405	CCLE_WES	0.369128	0.328395	0.585106	0.488971	0.835695	0.834168	0
ACH-000446	KPNSI9S_AUTONOMIC_GANGLIA	Peripheral nervous system	chr5	1213578	1213688	SLC6A19	5_1213668_G_A	12	26	14	30	38	44	CCLE_WES	0.315789	0.318182	0.461538	0.466667	1.01111	1.00787	0
ACH-000387	TF1_HAEMATOPOIETIC_AND_LYMPHOID_TISSUE	Blood	chr5	1219018	1219222	SLC6A19	5_1219151_T_C	12	23	0	29	35	29	CCLE_WES	0.342857	0	0.521739	0	0	0.0318644	1
ACH-000369	MOLM16_HAEMATOPOIETIC_AND_LYMPHOID_TISSUE	Blood	chr5	1216673	1217060	SLC6A19	5_1216900_G_A	66	86	9	10	152	19	CCLE_WES	0.434211	0.473684	0.767442	0.9	1.17273	1.17687	0
ACH-000301	LAMA84_HAEMATOPOIETIC_AND_LYMPHOID_TISSUE	Blood	chr5	1221816	1225232	SLC6A19	5_1223835_T_C	34	30	145	254	64	399	CCLE_WGS	0.53125	0.363409	1.13333	0.570866	0.503705	0.505424	0
ACH-000247	OCUM1_STOMACH	Gastric	chr5	1221816	1225232	SLC6A19	5_1222776_G_A	20	21	10	4	41	14	CCLE_WGS	0.487805	0.714286	0.952381	2.5	2.625	2.44715	0
ACH-000005	HEL9217_HAEMATOPOIETIC_AND_LYMPHOID_TISSUE	Blood	chr5	1221816	1225232	SLC6A19	5_1223772_T_C	53	42	118	143	95	261	CCLE_WGS	0.557895	0.452107	1.2619	0.825175	0.653912	0.655997	0

## Sheet: CLPTM1L_SNP_counts
Supplementary Table S4e: SNP read counts for CLPTM1L
SNP-level allele-specific estimates for CLPTM1L
	Achilles_ID	CCLE_name	Disease	Exon_chromosome	Exon_start	Exon_end	Gene_name	SNP	DNA_ref_count	DNA_alt_count	RNA_ref_count	RNA_alt_count	DNA_total_count	RNA_total_count	DNA_source	DNA_ref_frac	RNA_ref_frac	DNA_ratio	RNA_ratio	RNA_DNA_foldchange	RNA_DNA_foldchange_pseudo	MAE
0	ACH-000009	C2BBE1_LARGE_INTESTINE	Colorectal	chr5	1326376	1326551	CLPTM1L	5_1326408_G_A	46	20	28	7	66	35	CCLE_WGS	0.69697	0.8	2.3	4	1.73913	1.67527	0
1	ACH-000009	C2BBE1_LARGE_INTESTINE	Colorectal	chr5	1317859	1318568	CLPTM1L	5_1318306_A_G	28	21	488	149	49	637	CCLE_WGS	0.571429	0.766091	1.33333	3.27517	2.45638	2.465	0
2	ACH-000009	C2BBE1_LARGE_INTESTINE	Colorectal	chr5	1317859	1318568	CLPTM1L	5_1318491_G_A	33	16	500	173	49	673	CCLE_WGS	0.673469	0.742942	2.0625	2.89017	1.4013	1.42084	0
3	ACH-000018	T24_URINARY_TRACT	Urinary tract	chr5	1317859	1318568	CLPTM1L	5_1318222_A_G	14	24	124	288	38	412	CCLE_WGS	0.368421	0.300971	0.583333	0.430556	0.738095	0.729158	0
4	ACH-000018	T24_URINARY_TRACT	Urinary tract	chr5	1338019	1338097	CLPTM1L	5_1338078_C_T	40	8	422	181	48	603	CCLE_WGS	0.833333	0.699834	5	2.33149	0.466298	0.488556	0
5	ACH-000021	NCIH1693_LUNG	Lung	chr5	1338019	1338097	CLPTM1L	5_1338078_C_T	36	16	650	435	52	1085	CCLE_WGS	0.692308	0.599078	2.25	1.49425	0.664112	0.675228	0
6	ACH-000023	PATU8988T_PANCREAS	Pancreas	chr5	1326376	1326551	CLPTM1L	5_1326472_C_T	65	8	2899	10	73	2909	CCLE_WGS	0.890411	0.996562	8.125	289.9	35.68	35.8353	1
7	ACH-000023	PATU8988T_PANCREAS	Pancreas	chr5	1326376	1326551	CLPTM1L	5_1326476_G_C	67	8	2729	16	75	2745	CCLE_WGS	0.893333	0.994171	8.375	170.562	20.3657	20.8312	1
8	ACH-000023	PATU8988T_PANCREAS	Pancreas	chr5	1317859	1318568	CLPTM1L	5_1317949_C_T	24	32	79	101	56	180	CCLE_WGS	0.428571	0.438889	0.75	0.782178	1.0429	1.03901	0
9	ACH-000024	OPM2_HAEMATOPOIETIC_AND_LYMPHOID_TISSUE	Plasma cell	chr5	1317859	1318568	CLPTM1L	5_1318443_C_T	46	9	1760	165	55	1925	CCLE_WGS	0.836364	0.914286	5.11111	10.6667	2.08696	2.17324	0
10	ACH-000027	GOS3_CENTRAL_NERVOUS_SYSTEM	Central nervous system	chr5	1317859	1318568	CLPTM1L	5_1318491_G_A	23	23	174	146	46	320	CCLE_WES	0.5	0.54375	1	1.19178	1.19178	1.19113	0
11	ACH-000035	NCIH1650_LUNG	Lung	chr5	1335172	1335289	CLPTM1L	5_1335280_G_A	19	71	314	1183	90	1497	CCLE_WGS	0.211111	0.209753	0.267606	0.265427	0.991858	0.97437	0
12	ACH-000053	KARPAS299_HAEMATOPOIETIC_AND_LYMPHOID_TISSUE	Lymphocyte	chr5	1317859	1318568	CLPTM1L	5_1317949_C_T	21	9	19	17	30	36	CCLE_WGS	0.7	0.527778	2.33333	1.11765	0.478992	0.492359	0
13	ACH-000075	U87MG_CENTRAL_NERVOUS_SYSTEM	Central nervous system	chr5	1317859	1318568	CLPTM1L	5_1318306_A_G	14	14	193	184	28	377	CCLE_WGS	0.5	0.511936	1	1.04891	1.04891	1.04878	0
14	ACH-000075	U87MG_CENTRAL_NERVOUS_SYSTEM	Central nervous system	chr5	1317859	1318568	CLPTM1L	5_1318491_G_A	16	14	174	184	30	358	CCLE_WGS	0.533333	0.486034	1.14286	0.945652	0.827446	0.831157	0
15	ACH-000075	U87MG_CENTRAL_NERVOUS_SYSTEM	Central nervous system	chr5	1326376	1326551	CLPTM1L	5_1326408_G_A	23	26	12	14	49	26	CCLE_WGS	0.469388	0.461538	0.884615	0.857143	0.968944	0.97212	0
16	ACH-000086	ACCMESO1_PLEURA	Lung	chr5	1323902	1323984	CLPTM1L	5_1323961_C_T	30	53	346	789	83	1135	CCLE_WES	0.361446	0.304846	0.566038	0.43853	0.774736	0.769848	0
17	ACH-000112	SIGM5_HAEMATOPOIETIC_AND_LYMPHOID_TISSUE	Blood	chr5	1317859	1318568	CLPTM1L	5_1318491_G_A	31	26	213	199	57	412	CCLE_WES	0.54386	0.51699	1.19231	1.07035	0.897714	0.900306	0
18	ACH-000117	EFM192A_BREAST	Breast	chr5	1317859	1318568	CLPTM1L	5_1317949_C_T	24	25	31	22	49	53	CCLE_WGS	0.489796	0.584906	0.96	1.40909	1.4678	1.45714	0
19	ACH-000125	TO175T_FIBROBLAST	Fibroblast	chr5	1335172	1335289	CLPTM1L	5_1335280_G_A	46	41	69	101	87	170	CCLE_WES	0.528736	0.405882	1.12195	0.683168	0.608911	0.611102	0
20	ACH-000133	HS729_SOFT_TISSUE	Fibroblast	chr5	1335172	1335289	CLPTM1L	5_1335196_C_T	34	27	442	365	61	807	CCLE_WES	0.557377	0.547708	1.25926	1.21096	0.961644	0.965027	0
21	ACH-000140	PFEIFFER_HAEMATOPOIETIC_AND_LYMPHOID_TISSUE	Lymphocyte	chr5	1317859	1318568	CLPTM1L	5_1318491_G_A	41	21	712	298	62	1010	CCLE_WES	0.66129	0.70495	1.95238	2.38926	1.22377	1.2366	0
22	ACH-000145	SKLMS1_SOFT_TISSUE	Soft tissue	chr5	1317859	1318568	CLPTM1L	5_1317949_C_T	11	15	14	18	26	32	CCLE_WGS	0.423077	0.4375	0.733333	0.777778	1.06061	1.0564	0
23	ACH-000163	SW579_THYROID	Thyroid	chr5	1317859	1318568	CLPTM1L	5_1317949_C_T	13	16	16	14	29	30	CCLE_WGS	0.448276	0.533333	0.8125	1.14286	1.40659	1.3908	0
24	ACH-000184	HS343T_FIBROBLAST	Fibroblast	chr5	1322992	1323026	CLPTM1L	5_1322993_G_A	54	53	279	268	107	547	CCLE_WES	0.504673	0.510055	1.01887	1.04104	1.02177	1.02187	0
25	ACH-000187	CORL311_LUNG	Lung	chr5	1317859	1318568	CLPTM1L	5_1317949_C_T	20	19	25	26	39	51	CCLE_WGS	0.512821	0.490196	1.05263	0.961538	0.913462	0.915324	0
26	ACH-000196	HCC1599_BREAST	Breast	chr5	1326376	1326551	CLPTM1L	5_1326472_C_T	49	8	55	1	57	56	CCLE_WGS	0.859649	0.982143	6.125	55	8.97959	6.35354	1
27	ACH-000201	A204_SOFT_TISSUE	Soft tissue	chr5	1338019	1338097	CLPTM1L	5_1338078_C_T	15	23	207	201	38	408	CCLE_WGS	0.394737	0.507353	0.652174	1.02985	1.5791	1.56127	0
28	ACH-000207	DETROIT562_UPPER_AERODIGESTIVE_TRACT	Upper aerodigestive	chr5	1317859	1318568	CLPTM1L	5_1317949_C_T	41	44	48	22	85	70	CCLE_WGS	0.482353	0.685714	0.931818	2.18182	2.34146	2.31138	0
29	ACH-000211	DAOY_CENTRAL_NERVOUS_SYSTEM	Central nervous system	chr5	1317859	1318568	CLPTM1L	5_1317949_C_T	20	14	16	14	34	30	CCLE_WGS	0.588235	0.533333	1.42857	1.14286	0.8	0.804878	0
30	ACH-000238	SCC4_UPPER_AERODIGESTIVE_TRACT	Upper aerodigestive	chr5	1326376	1326551	CLPTM1L	5_1326476_G_C	127	8	96	2	135	98	CCLE_WGS	0.940741	0.979592	15.875	48	3.02362	2.57333	0
31	ACH-000243	DANG_PANCREAS	Pancreas	chr5	1317859	1318568	CLPTM1L	5_1317949_C_T	25	25	38	22	50	60	CCLE_WGS	0.5	0.633333	1	1.72727	1.72727	1.71111	0
32	ACH-000243	DANG_PANCREAS	Pancreas	chr5	1326376	1326551	CLPTM1L	5_1326472_C_T	45	8	85	2	53	87	CCLE_WGS	0.849057	0.977011	5.625	42.5	7.55556	6.38901	1
33	ACH-000260	SKNAS_AUTONOMIC_GANGLIA	Peripheral nervous system	chr5	1317859	1318568	CLPTM1L	5_1317949_C_T	15	12	40	36	27	76	CCLE_WGS	0.555556	0.526316	1.25	1.11111	0.888889	0.89483	0
34	ACH-000270	HPAC_PANCREAS	Pancreas	chr5	1326376	1326551	CLPTM1L	5_1326547_G_T	60	11	91	17	71	108	CCLE_WGS	0.84507	0.842593	5.45455	5.35294	0.981373	0.993861	0
35	ACH-000270	HPAC_PANCREAS	Pancreas	chr5	1326376	1326551	CLPTM1L	5_1326472_C_T	129	17	225	1	146	226	CCLE_WGS	0.883562	0.995575	7.58824	225	29.6512	20.3153	1
36	ACH-000270	HPAC_PANCREAS	Pancreas	chr5	1326376	1326551	CLPTM1L	5_1326476_G_C	119	20	213	2	139	215	CCLE_WGS	0.856115	0.990698	5.95	106.5	17.8992	14.6502	1
37	ACH-000298	NCIH2029_LUNG	Lung	chr5	1344795	1345214	CLPTM1L	5_1345199_G_A	8	13			21		CCLE_WGS	0.380952		0.615385
38	ACH-000308	EFO21_OVARY	Ovary	chr5	1317859	1318568	CLPTM1L	5_1317949_C_T	66	20	72	17	86	89	CCLE_WGS	0.767442	0.808989	3.3	4.23529	1.28342	1.27712	0
39	ACH-000334	DB_HAEMATOPOIETIC_AND_LYMPHOID_TISSUE	Lymphocyte	chr5	1317859	1318568	CLPTM1L	5_1317949_C_T	20	21	40	21	41	61	CCLE_WGS	0.487805	0.655738	0.952381	1.90476	2	1.97561	0
40	ACH-000354	CAPAN1_PANCREAS	Pancreas	chr5	1317859	1318568	CLPTM1L	5_1317949_C_T	38	25	67	27	63	94	CCLE_WGS	0.603175	0.712766	1.52	2.48148	1.63255	1.62574	0
41	ACH-000356	MKN45_STOMACH	Gastric	chr5	1317859	1318568	CLPTM1L	5_1317949_C_T	20	44	29	47	64	76	CCLE_WGS	0.3125	0.381579	0.454545	0.617021	1.35745	1.34814	0
42	ACH-000358	NCIH69_LUNG	Lung	chr5	1317859	1318568	CLPTM1L	5_1317949_C_T	19	18	23	16	37	39	CCLE_WGS	0.513514	0.589744	1.05556	1.4375	1.36184	1.3512	0
43	ACH-000360	NCIH508_LARGE_INTESTINE	Colorectal	chr5	1317859	1318568	CLPTM1L	5_1317949_C_T	26	39	49	57	65	106	CCLE_WGS	0.4	0.462264	0.666667	0.859649	1.28947	1.28318	0
44	ACH-000364	U2OS_BONE	Bone	chr5	1317859	1318568	CLPTM1L	5_1317949_C_T	21	24	80	61	45	141	CCLE_WGS	0.466667	0.567376	0.875	1.31148	1.49883	1.49159	0
45	ACH-000395	NCIH520_LUNG	Lung	chr5	1326376	1326551	CLPTM1L	5_1326434_A_G	48	8	25	0	56	25	CCLE_WGS	0.857143	1	6	inf	inf	8.93814	1
46	ACH-000403	NCIH747_LARGE_INTESTINE	Colorectal	chr5	1332230	1332453	CLPTM1L	5_1332393_C_T	18	30			48		CCLE_WGS	0.375		0.6
47	ACH-000411	769P_KIDNEY	Kidney	chr5	1344795	1345214	CLPTM1L	5_1345199_G_A	10	16			26		CCLE_WGS	0.384615		0.625
48	ACH-000411	769P_KIDNEY	Kidney	chr5	1317859	1318568	CLPTM1L	5_1317949_C_T	12	10	21	17	22	38	CCLE_WGS	0.545455	0.552632	1.2	1.23529	1.02941	1.032	0
49	ACH-000422	SNU475_LIVER	Liver	chr5	1317859	1318568	CLPTM1L	5_1317949_C_T	10	19	18	32	29	50	CCLE_WGS	0.344828	0.36	0.526316	0.5625	1.06875	1.05714	0
50	ACH-000427	NCIN87_STOMACH	Gastric	chr5	1317859	1318568	CLPTM1L	5_1317949_C_T	16	15	81	54	31	135	CCLE_WGS	0.516129	0.6	1.06667	1.5	1.40625	1.40478	0
51	ACH-000429	A704_KIDNEY	Kidney	chr5	1326376	1326551	CLPTM1L	5_1326443_C_A	16	19	48	40	35	88	CCLE_WGS	0.457143	0.545455	0.842105	1.2	1.425	1.41526	0
52	ACH-000429	A704_KIDNEY	Kidney	chr5	1332230	1332453	CLPTM1L	5_1332393_C_T	20	18			38		CCLE_WGS	0.526316		1.11111
53	ACH-000429	A704_KIDNEY	Kidney	chr5	1317859	1318568	CLPTM1L	5_1317949_C_T	23	18	25	10	41	35	CCLE_WGS	0.560976	0.714286	1.27778	2.5	1.95652	1.91185	0
54	ACH-000433	CAKI1_KIDNEY	Kidney	chr5	1317859	1318568	CLPTM1L	5_1317872_T_C	23	43			66		CCLE_WGS	0.348485		0.534884
55	ACH-000433	CAKI1_KIDNEY	Kidney	chr5	1326130	1326370	CLPTM1L	5_1326155_C_T	26	22			48		CCLE_WGS	0.541667		1.18182
56	ACH-000454	HCC95_LUNG	Lung	chr5	1317859	1318568	CLPTM1L	5_1317949_C_T	14	48	46	47	62	93	CCLE_WGS	0.225806	0.494624	0.291667	0.978723	3.35562	3.27441	0
57	ACH-000457	CAL54_KIDNEY	Kidney	chr5	1317859	1318568	CLPTM1L	5_1317949_C_T	18	15	10	6	33	16	CCLE_WGS	0.545455	0.625	1.2	1.66667	1.38889	1.35343	0
58	ACH-000464	CAS1_CENTRAL_NERVOUS_SYSTEM	Central nervous system	chr5	1317859	1318568	CLPTM1L	5_1317949_C_T	24	19	26	29	43	55	CCLE_WGS	0.55814	0.472727	1.26316	0.896552	0.70977	0.714978	0
59	ACH-000486	KU1919_URINARY_TRACT	Urinary tract	chr5	1332230	1332453	CLPTM1L	5_1332442_C_A	22	27			49		CCLE_WGS	0.44898		0.814815
60	ACH-000492	MUTZ5_HAEMATOPOIETIC_AND_LYMPHOID_TISSUE	Blood	chr5	1322992	1323026	CLPTM1L	5_1322993_G_A	82	75	495	421	157	916	CCLE_WES	0.522293	0.540393	1.09333	1.17577	1.0754	1.07582	0
61	ACH-000493	SNU423_LIVER	Liver	chr5	1326376	1326551	CLPTM1L	5_1326502_C_A	38	12	26	9	50	35	CCLE_WGS	0.76	0.742857	3.16667	2.88889	0.912281	0.905673	0
62	ACH-000511	CALU1_LUNG	Lung	chr5	1317859	1318568	CLPTM1L	5_1317949_C_T	41	14	51	9	55	60	CCLE_WGS	0.745455	0.85	2.92857	5.66667	1.93496	1.8941	0
63	ACH-000519	PEER_HAEMATOPOIETIC_AND_LYMPHOID_TISSUE	Blood	chr5	1325866	1325931	CLPTM1L	5_1325874_C_T	38	27	549	435	65	984	CCLE_WES	0.584615	0.557927	1.40741	1.26207	0.896733	0.901263	0
64	ACH-000525	NCIH2171_LUNG	Lung	chr5	1317859	1318568	CLPTM1L	5_1317949_C_T	26	29	22	34	55	56	CCLE_WGS	0.472727	0.392857	0.896552	0.647059	0.721719	0.726005	0
65	ACH-000536	BT20_BREAST	Breast	chr5	1326376	1326551	CLPTM1L	5_1326472_C_T	130	16	186	1	146	187	CCLE_WGS	0.890411	0.994652	8.125	186	22.8923	15.7203	1
66	ACH-000536	BT20_BREAST	Breast	chr5	1326376	1326551	CLPTM1L	5_1326547_G_T	79	16	105	12	95	117	CCLE_WGS	0.831579	0.897436	4.9375	8.75	1.77215	1.7517	0
67	ACH-000536	BT20_BREAST	Breast	chr5	1326376	1326551	CLPTM1L	5_1326476_G_C	116	23	174	1	139	175	CCLE_WGS	0.834532	0.994286	5.04348	174	34.5	23.4664	1
68	ACH-000536	BT20_BREAST	Breast	chr5	1326376	1326551	CLPTM1L	5_1326434_A_G	120	13	170	0	133	170	CCLE_WGS	0.902256	1	9.23077	inf	inf	38.2033	1
69	ACH-000550	IGR39_SKIN	Skin	chr5	1317859	1318568	CLPTM1L	5_1317949_C_T	15	19	24	23	34	47	CCLE_WGS	0.441176	0.510638	0.789474	1.04348	1.32174	1.3116	0
70	ACH-000551	K562_HAEMATOPOIETIC_AND_LYMPHOID_TISSUE	Blood	chr5	1317859	1318568	CLPTM1L	5_1318491_G_A	30	29	148	153	59	301	CCLE_WES	0.508475	0.491694	1.03448	0.96732	0.935076	0.935708	0
71	ACH-000574	FUOV1_OVARY	Ovary	chr5	1317859	1318568	CLPTM1L	5_1317949_C_T	16	16	43	34	32	77	CCLE_WGS	0.5	0.558442	1	1.26471	1.26471	1.26087	0
72	ACH-000579	UACC257_SKIN	Skin	chr5	1317859	1318568	CLPTM1L	5_1317949_C_T	16	9	28	17	25	45	CCLE_WGS	0.64	0.622222	1.77778	1.64706	0.926471	0.937662	0
73	ACH-000582	COLO741_SKIN	Skin	chr5	1317859	1318568	CLPTM1L	5_1317949_C_T	16	29	41	30	45	71	CCLE_WGS	0.355556	0.577465	0.551724	1.36667	2.47708	2.43269	0
74	ACH-000586	NCIH1876_LUNG	Lung	chr5	1317859	1318568	CLPTM1L	5_1318457_C_T	16	32	145	262	48	407	CCLE_WGS	0.333333	0.356265	0.5	0.553435	1.10687	1.09177	0
75	ACH-000587	NCIH1975_LUNG	Lung	chr5	1317859	1318568	CLPTM1L	5_1317949_C_T	14	28	22	21	42	43	CCLE_WGS	0.333333	0.511628	0.5	1.04762	2.09524	2.05694	0
76	ACH-000594	DMS153_LUNG	Lung	chr5	1317859	1318568	CLPTM1L	5_1317949_C_T	25	17	75	29	42	104	CCLE_WGS	0.595238	0.721154	1.47059	2.58621	1.75862	1.7564	0
77	ACH-000601	MIAPACA2_PANCREAS	Pancreas	chr5	1317859	1318568	CLPTM1L	5_1317949_C_T	35	16	83	25	51	108	CCLE_WGS	0.686275	0.768519	2.1875	3.32	1.51771	1.52196	0
78	ACH-000608	COV644_OVARY	Ovary	chr5	1317859	1318568	CLPTM1L	5_1317949_C_T	31	12	9	3	43	12	CCLE_WGS	0.72093	0.75	2.58333	3	1.16129	1.0771	0
79	ACH-000610	NCIH2227_LUNG	Lung	chr5	1317859	1318568	CLPTM1L	5_1317949_C_T	21	29	38	29	50	67	CCLE_WGS	0.42	0.567164	0.724138	1.31034	1.80952	1.7907	0
80	ACH-000614	RVH421_SKIN	Skin	chr5	1317859	1318568	CLPTM1L	5_1317949_C_T	18	18	12	21	36	33	CCLE_WGS	0.5	0.363636	1	0.571429	0.571429	0.581395	0
81	ACH-000616	HS746T_STOMACH	Gastric	chr5	1322992	1323026	CLPTM1L	5_1322998_C_T	15	17	267	265	32	532	CCLE_WGS	0.46875	0.50188	0.882353	1.00755	1.14189	1.13754	0
82	ACH-000625	HEP3B217_LIVER	Liver	chr5	1344466	1344566	CLPTM1L	5_1344498_C_G	18	23	245	492	41	737	CCLE_WES	0.439024	0.332429	0.782609	0.497967	0.636292	0.633201	0
83	ACH-000632	HS944T_SKIN	Skin	chr5	1317859	1318568	CLPTM1L	5_1318306_A_G	22	10	487	197	32	684	CCLE_WGS	0.6875	0.711988	2.2	2.47208	1.12367	1.1519	0
84	ACH-000633	FU97_STOMACH	Gastric	chr5	1326376	1326551	CLPTM1L	5_1326547_G_T	98	8	23	1	106	24	CCLE_WGS	0.924528	0.958333	12.25	23	1.87755	1.35195	0
85	ACH-000635	SNU119_OVARY	Ovary	chr5	1324878	1324928	CLPTM1L	5_1324901_T_C	33	31	497	740	64	1237	CCLE_WGS	0.515625	0.401778	1.06452	0.671622	0.630917	0.631733	0
86	ACH-000635	SNU119_OVARY	Ovary	chr5	1317859	1318568	CLPTM1L	5_1317949_C_T	31	28	80	38	59	118	CCLE_WGS	0.525424	0.677966	1.10714	2.10526	1.90153	1.89177	0
87	ACH-000647	TE1_OESOPHAGUS	Esophagus	chr5	1326376	1326551	CLPTM1L	5_1326434_A_G	108	8	511	0	116	511	CCLE_WGS	0.931034	1	13.5	inf	inf	80.1429	1
88	ACH-000649	786O_KIDNEY	Kidney	chr5	1332230	1332453	CLPTM1L	5_1332318_C_T	17	49			66		CCLE_WGS	0.257576		0.346939
89	ACH-000653	JJN3_HAEMATOPOIETIC_AND_LYMPHOID_TISSUE	Plasma cell	chr5	1317859	1318568	CLPTM1L	5_1318491_G_A	51	34	1377	619	85	1996	CCLE_WES	0.6	0.68988	1.5	2.22456	1.48304	1.48957	0
90	ACH-000662	CORL23_LUNG	Lung	chr5	1326376	1326551	CLPTM1L	5_1326434_A_G	72	8	31	0	80	31	CCLE_WGS	0.9	1	9	inf	inf	7.38621	1
91	ACH-000668	HCC70_BREAST	Breast	chr5	1326376	1326551	CLPTM1L	5_1326547_G_T	117	9	52	0	126	52	CCLE_WGS	0.928571	1	13	inf	inf	8.48936	1
92	ACH-000669	SW900_LUNG	Lung	chr5	1317859	1318568	CLPTM1L	5_1317949_C_T	19	38	23	68	57	91	CCLE_WGS	0.333333	0.252747	0.5	0.338235	0.676471	0.677335	0
93	ACH-000679	OE19_OESOPHAGUS	Esophagus	chr5	1317859	1318568	CLPTM1L	5_1317949_C_T	9	14	13	16	23	29	CCLE_WGS	0.391304	0.448276	0.642857	0.8125	1.26389	1.2488	0
94	ACH-000679	OE19_OESOPHAGUS	Esophagus	chr5	1338019	1338097	CLPTM1L	5_1338078_C_T	18	17	187	130	35	317	CCLE_WGS	0.514286	0.589905	1.05882	1.43846	1.35855	1.35912	0
95	ACH-000688	OV7_OVARY	Ovary	chr5	1317859	1318568	CLPTM1L	5_1317949_C_T	29	41	21	23	70	44	CCLE_WGS	0.414286	0.477273	0.707317	0.913043	1.29085	1.28705	0
96	ACH-000691	HCC2157_BREAST	Breast	chr5	1317859	1318568	CLPTM1L	5_1317949_C_T	16	39	12	26	55	38	CCLE_WGS	0.290909	0.315789	0.410256	0.461538	1.125	1.12922	0
97	ACH-000699	HCC1395_BREAST	Breast	chr5	1331914	1331998	CLPTM1L	5_1331951_C_A	104	65	422	261	169	683	CCLE_WES	0.615385	0.617862	1.6	1.61686	1.01054	1.0127	0
98	ACH-000703	DMS79_LUNG	Lung	chr5	1326376	1326551	CLPTM1L	5_1326501_T_C	37	10	26	0	47	26	CCLE_WGS	0.787234	1	3.7	inf	inf	14.84	1
99	ACH-000712	HCC1833_LUNG	Lung	chr5	1326376	1326551	CLPTM1L	5_1326541_C_T	12	12	12	11	24	23	CCLE_WGS	0.5	0.521739	1	1.09091	1.09091	1.08696	0
100	ACH-000724	HT1376_URINARY_TRACT	Urinary tract	chr5	1317859	1318568	CLPTM1L	5_1317949_C_T	49	25	45	28	74	73	CCLE_WGS	0.662162	0.616438	1.96	1.60714	0.819971	0.822435	0
101	ACH-000725	HCC202_BREAST	Breast	chr5	1317859	1318568	CLPTM1L	5_1317949_C_T	13	33	21	30	46	51	CCLE_WGS	0.282609	0.411765	0.393939	0.7	1.77692	1.74924	0
102	ACH-000739	HEPG2_LIVER	Liver	chr5	1326376	1326551	CLPTM1L	5_1326408_G_A	18	21	8	1	39	9	CCLE_WGS	0.461538	0.888889	0.857143	8	9.33333	6.58559	1
103	ACH-000739	HEPG2_LIVER	Liver	chr5	1317859	1318568	CLPTM1L	5_1318491_G_A	18	25	135	99	43	234	CCLE_WGS	0.418605	0.576923	0.72	1.36364	1.89394	1.87709	0
104	ACH-000739	HEPG2_LIVER	Liver	chr5	1317859	1318568	CLPTM1L	5_1318306_A_G	20	19	120	112	39	232	CCLE_WGS	0.512821	0.517241	1.05263	1.07143	1.01786	1.01886	0
105	ACH-000747	NCIH1703_LUNG	Lung	chr5	1317859	1318568	CLPTM1L	5_1317949_C_T	34	70	118	142	104	260	CCLE_WGS	0.326923	0.453846	0.485714	0.830986	1.71085	1.69931	0
106	ACH-000749	DMS273_LUNG	Lung	chr5	1317859	1318568	CLPTM1L	5_1317949_C_T	13	13	25	25	26	50	CCLE_WGS	0.5	0.5	1	1	1	1	0
107	ACH-000750	LOXIMVI_SKIN	Skin	chr5	1338019	1338097	CLPTM1L	5_1338078_C_T	23	19	391	181	42	572	CCLE_WGS	0.547619	0.683566	1.21053	2.16022	1.78453	1.78987	0
108	ACH-000759	MDAMB175VII_BREAST	Breast	chr5	1332230	1332453	CLPTM1L	5_1332393_C_T	15	15			30		CCLE_WGS	0.5		1
109	ACH-000759	MDAMB175VII_BREAST	Breast	chr5	1317859	1318568	CLPTM1L	5_1317887_T_C	18	17			35		CCLE_WGS	0.514286		1.05882
110	ACH-000763	MM1S_HAEMATOPOIETIC_AND_LYMPHOID_TISSUE	Plasma cell	chr5	1322992	1323026	CLPTM1L	5_1322993_G_A	25	24	2060	2079	49	4139	CCLE_WGS	0.510204	0.497705	1.04167	0.990861	0.951227	0.952006	0
111	ACH-000763	MM1S_HAEMATOPOIETIC_AND_LYMPHOID_TISSUE	Plasma cell	chr5	1317859	1318568	CLPTM1L	5_1318478_C_T	17	19	1844	1898	36	3742	CCLE_WGS	0.472222	0.492785	0.894737	0.971549	1.08585	1.08259	0
112	ACH-000763	MM1S_HAEMATOPOIETIC_AND_LYMPHOID_TISSUE	Plasma cell	chr5	1335172	1335289	CLPTM1L	5_1335194_G_A	30	24	2461	2224	54	4685	CCLE_WES	0.555556	0.525293	1.25	1.10656	0.885252	0.888861	0
113	ACH-000763	MM1S_HAEMATOPOIETIC_AND_LYMPHOID_TISSUE	Plasma cell	chr5	1322992	1323026	CLPTM1L	5_1322993_G_A	79	74	2060	2079	153	4139	CCLE_WES	0.51634	0.497705	1.06757	0.990861	0.928148	0.928545	0
114	ACH-000763	MM1S_HAEMATOPOIETIC_AND_LYMPHOID_TISSUE	Plasma cell	chr5	1317859	1318568	CLPTM1L	5_1318478_C_T	28	20	1844	1898	48	3742	CCLE_WES	0.583333	0.492785	1.4	0.971549	0.693964	0.698839	0
115	ACH-000763	MM1S_HAEMATOPOIETIC_AND_LYMPHOID_TISSUE	Plasma cell	chr5	1335172	1335289	CLPTM1L	5_1335194_G_A	21	16	2461	2224	37	4685	CCLE_WGS	0.567568	0.525293	1.3125	1.10656	0.843097	0.849206	0
116	ACH-000780	NCIH1105_LUNG	Lung	chr5	1326376	1326551	CLPTM1L	5_1326408_G_A	20	19	19	19	39	38	CCLE_WGS	0.512821	0.5	1.05263	1	0.95	0.95122	0
117	ACH-000780	NCIH1105_LUNG	Lung	chr5	1317859	1318568	CLPTM1L	5_1318491_G_A	25	24	247	211	49	458	CCLE_WGS	0.510204	0.539301	1.04167	1.17062	1.12379	1.12432	0
118	ACH-000780	NCIH1105_LUNG	Lung	chr5	1317859	1318568	CLPTM1L	5_1318306_A_G	20	19	226	209	39	435	CCLE_WGS	0.512821	0.51954	1.05263	1.08134	1.02727	1.02841	0
119	ACH-000788	A2058_SKIN	Skin	chr5	1326376	1326551	CLPTM1L	5_1326546_C_G	14	24	15	22	38	37	CCLE_WGS	0.368421	0.405405	0.583333	0.681818	1.16883	1.16398	0
120	ACH-000788	A2058_SKIN	Skin	chr5	1326376	1326551	CLPTM1L	5_1326476_G_C	37	8	43	1	45	44	CCLE_WGS	0.822222	0.977273	4.625	43	9.2973	6.57333	1
121	ACH-000788	A2058_SKIN	Skin	chr5	1317859	1318568	CLPTM1L	5_1317949_C_T	14	21	44	84	35	128	CCLE_WGS	0.4	0.34375	0.666667	0.52381	0.785714	0.780861	0
122	ACH-000810	SKMEL30_SKIN	Skin	chr5	1317859	1318568	CLPTM1L	5_1317949_C_T	25	15	29	18	40	47	CCLE_WGS	0.625	0.617021	1.66667	1.61111	0.966667	0.969263	0
123	ACH-000811	SKOV3_OVARY	Ovary	chr5	1317859	1318568	CLPTM1L	5_1317949_C_T	14	19	23	32	33	55	CCLE_WGS	0.424242	0.418182	0.736842	0.71875	0.975446	0.972414	0
124	ACH-000811	SKOV3_OVARY	Ovary	chr5	1335172	1335289	CLPTM1L	5_1335232_G_C	24	21	362	336	45	698	CCLE_WGS	0.533333	0.518625	1.14286	1.07738	0.942708	0.945356	0
125	ACH-000816	NCIH524_LUNG	Lung	chr5	1326376	1326551	CLPTM1L	5_1326408_G_A	44	27	18	9	71	27	CCLE_WGS	0.619718	0.666667	1.62963	2	1.22727	1.20343	0
126	ACH-000816	NCIH524_LUNG	Lung	chr5	1317859	1318568	CLPTM1L	5_1318491_G_A	55	46	540	302	101	842	CCLE_WGS	0.544554	0.64133	1.19565	1.78808	1.49548	1.49703	0
127	ACH-000816	NCIH524_LUNG	Lung	chr5	1317859	1318568	CLPTM1L	5_1318306_A_G	22	14	552	287	36	839	CCLE_WGS	0.611111	0.657926	1.57143	1.92334	1.22395	1.23845	0
128	ACH-000822	SKMEL24_SKIN	Skin	chr5	1317859	1318568	CLPTM1L	5_1317949_C_T	45	24	100	47	69	147	CCLE_WGS	0.652174	0.680272	1.875	2.12766	1.13475	1.13927	0
129	ACH-000832	CAL27_UPPER_AERODIGESTIVE_TRACT	Upper aerodigestive	chr5	1317859	1318568	CLPTM1L	5_1317949_C_T	17	21	9	9	38	18	CCLE_WGS	0.447368	0.5	0.809524	1	1.23529	1.22857	0
130	ACH-000839	SCABER_URINARY_TRACT	Urinary tract	chr5	1326376	1326551	CLPTM1L	5_1326476_G_C	32	10	12	0	42	12	CCLE_WGS	0.761905	1	3.2	inf	inf	8.07692	1
131	ACH-000839	SCABER_URINARY_TRACT	Urinary tract	chr5	1317859	1318568	CLPTM1L	5_1317949_C_T	14	22	16	19	36	35	CCLE_WGS	0.388889	0.457143	0.636364	0.842105	1.32331	1.313	0
132	ACH-000839	SCABER_URINARY_TRACT	Urinary tract	chr5	1326376	1326551	CLPTM1L	5_1326443_C_A	30	23	5	5	53	10	CCLE_WGS	0.566038	0.5	1.30435	1	0.766667	0.770492	0
133	ACH-000839	SCABER_URINARY_TRACT	Urinary tract	chr5	1326376	1326551	CLPTM1L	5_1326472_C_T	37	8	12	0	45	12	CCLE_WGS	0.822222	1	4.625	inf	inf	5.66667	1
134	ACH-000856	CAL51_BREAST	Breast	chr5	1317859	1318568	CLPTM1L	5_1317949_C_T	20	12	15	15	32	30	CCLE_WGS	0.625	0.5	1.66667	1	0.6	0.609756	0
135	ACH-000859	HCC1954_BREAST	Breast	chr5	1335172	1335289	CLPTM1L	5_1335287_G_A	361	45	3946	1	406	3947	CCLE_WGS	0.889163	0.999747	8.02222	3946	491.884	331.149	1
136	ACH-000862	KMBC2_URINARY_TRACT	Urinary tract	chr5	1344466	1344566	CLPTM1L	5_1344546_C_T	21	13	202	93	34	295	CCLE_WES	0.617647	0.684746	1.61538	2.17204	1.3446	1.35991	0
137	ACH-000866	NCIH1048_LUNG	Lung	chr5	1332230	1332453	CLPTM1L	5_1332318_C_T	10	17			27		CCLE_WGS	0.37037		0.588235
138	ACH-000879	MFE296_ENDOMETRIUM	Uterus	chr5	1326376	1326551	CLPTM1L	5_1326408_G_A	24	26	23	30	50	53	CCLE_WGS	0.48	0.433962	0.923077	0.766667	0.830556	0.833389	0
139	ACH-000879	MFE296_ENDOMETRIUM	Uterus	chr5	1317859	1318568	CLPTM1L	5_1318491_G_A	25	23	248	252	48	500	CCLE_WES	0.520833	0.496	1.08696	0.984127	0.905397	0.90697	0
140	ACH-000879	MFE296_ENDOMETRIUM	Uterus	chr5	1317859	1318568	CLPTM1L	5_1318491_G_A	27	33	248	252	60	500	CCLE_WGS	0.45	0.496	0.818182	0.984127	1.20282	1.19888	0
141	ACH-000879	MFE296_ENDOMETRIUM	Uterus	chr5	1317859	1318568	CLPTM1L	5_1318306_A_G	14	12	253	245	26	498	CCLE_WGS	0.538462	0.508032	1.16667	1.03265	0.885131	0.890161	0
142	ACH-000883	SW1783_CENTRAL_NERVOUS_SYSTEM	Central nervous system	chr5	1317859	1318568	CLPTM1L	5_1317949_C_T	13	22	25	35	35	60	CCLE_WGS	0.371429	0.416667	0.590909	0.714286	1.20879	1.19718	0
143	ACH-000883	SW1783_CENTRAL_NERVOUS_SYSTEM	Central nervous system	chr5	1338975	1339120	CLPTM1L	5_1338998_G_A	39	20	794	363	59	1157	CCLE_WGS	0.661017	0.686258	1.95	2.18733	1.12171	1.13435	0
144	ACH-000888	NCIH1793_LUNG	Lung	chr5	1317859	1318568	CLPTM1L	5_1317949_C_T	28	17	35	29	45	64	CCLE_WGS	0.622222	0.546875	1.64706	1.2069	0.732759	0.738924	0
145	ACH-000905	5637_URINARY_TRACT	Urinary tract	chr5	1332230	1332453	CLPTM1L	5_1332393_C_T	32	23			55		CCLE_WGS	0.581818		1.3913
146	ACH-000913	ESS1_ENDOMETRIUM	Uterus	chr5	1338019	1338097	CLPTM1L	5_1338078_C_T	16	18	381	317	34	698	CCLE_WGS	0.470588	0.545845	0.888889	1.20189	1.35213	1.34722	0
147	ACH-000927	BT474_BREAST	Breast	chr5	1326376	1326551	CLPTM1L	5_1326476_G_C	60	10	11	1	70	12	CCLE_WGS	0.857143	0.916667	6	11	1.83333	1.33058	0
148	ACH-000927	BT474_BREAST	Breast	chr5	1326376	1326551	CLPTM1L	5_1326472_C_T	65	8	11	1	73	12	CCLE_WGS	0.890411	0.916667	8.125	11	1.35385	0.994911	0
149	ACH-000928	JHUEM1_ENDOMETRIUM	Uterus	chr5	1317859	1318568	CLPTM1L	5_1317949_C_T	16	15	72	59	31	131	CCLE_WGS	0.516129	0.549618	1.06667	1.22034	1.14407	1.14464	0
150	ACH-000930	HCC1569_BREAST	Breast	chr5	1317859	1318568	CLPTM1L	5_1317949_C_T	8	31	13	17	39	30	CCLE_WGS	0.205128	0.433333	0.258065	0.764706	2.96324	2.85882	0
151	ACH-000932	SNU1_STOMACH	Gastric	chr5	1326130	1326370	CLPTM1L	5_1326360_G_A	25	29	31	21	54	52	CCLE_WGS	0.462963	0.596154	0.862069	1.47619	1.71238	1.69494	0
152	ACH-000936	EFO27_OVARY	Ovary	chr5	1317859	1318568	CLPTM1L	5_1318491_G_A	21	20	170	142	41	312	CCLE_WGS	0.512195	0.544872	1.05	1.19718	1.14017	1.14084	0
153	ACH-000936	EFO27_OVARY	Ovary	chr5	1317859	1318568	CLPTM1L	5_1318306_A_G	23	18	159	149	41	308	CCLE_WGS	0.560976	0.516234	1.27778	1.06711	0.835133	0.839892	0
154	ACH-000936	EFO27_OVARY	Ovary	chr5	1326376	1326551	CLPTM1L	5_1326408_G_A	15	26	9	5	41	14	CCLE_WGS	0.365854	0.642857	0.576923	1.8	3.12	2.95308	0
155	ACH-000939	SKUT1_SOFT_TISSUE	Soft tissue	chr5	1317859	1318568	CLPTM1L	5_1317949_C_T	18	20	12	18	38	30	CCLE_WGS	0.473684	0.4	0.9	0.666667	0.740741	0.748722	0
156	ACH-000940	AN3CA_ENDOMETRIUM	Uterus	chr5	1317859	1318568	CLPTM1L	5_1317949_C_T	18	13	46	22	31	68	CCLE_WGS	0.580645	0.676471	1.38462	2.09091	1.5101	1.50811	0
157	ACH-000943	RKO_LARGE_INTESTINE	Colorectal	chr5	1317859	1318568	CLPTM1L	5_1317949_C_T	17	13	12	13	30	25	CCLE_WGS	0.566667	0.48	1.30769	0.923077	0.705882	0.714286	0
158	ACH-000943	RKO_LARGE_INTESTINE	Colorectal	chr5	1326130	1326370	CLPTM1L	5_1326163_G_A	21	31	28	18	52	46	CCLE_WGS	0.403846	0.608696	0.677419	1.55556	2.2963	2.25707	0
159	ACH-000945	NCIH650_LUNG	Lung	chr5	1326376	1326551	CLPTM1L	5_1326408_G_A	85	20	47	7	105	54	CCLE_WGS	0.809524	0.87037	4.25	6.71429	1.57983	1.51852	0
160	ACH-000945	NCIH650_LUNG	Lung	chr5	1317859	1318568	CLPTM1L	5_1318491_G_A	106	15	807	112	121	919	CCLE_WGS	0.876033	0.878128	7.06667	7.20536	1.01963	1.04465	0
161	ACH-000945	NCIH650_LUNG	Lung	chr5	1317859	1318568	CLPTM1L	5_1318306_A_G	106	11	751	98	117	849	CCLE_WGS	0.905983	0.88457	9.63636	7.66327	0.795245	0.823836	0
162	ACH-000963	CCK81_LARGE_INTESTINE	Colorectal	chr5	1317859	1318568	CLPTM1L	5_1317949_C_T	23	28	20	18	51	38	CCLE_WGS	0.45098	0.526316	0.821429	1.11111	1.35266	1.34388	0
163	ACH-000972	HEC151_ENDOMETRIUM	Uterus	chr5	1334404	1334498	CLPTM1L	5_1334431_C_T	32	23	362	391	55	753	CCLE_WES	0.581818	0.480744	1.3913	0.925831	0.665441	0.669516	0
164	ACH-000974	SNGM_ENDOMETRIUM	Uterus	chr5	1326376	1326551	CLPTM1L	5_1326544_C_A	23	26	21	36	49	57	CCLE_WGS	0.469388	0.368421	0.884615	0.583333	0.65942	0.664238	0
165	ACH-000982	GP2D_LARGE_INTESTINE	Colorectal	chr5	1317859	1318568	CLPTM1L	5_1317949_C_T	19	19	18	14	38	32	CCLE_WGS	0.5	0.5625	1	1.28571	1.28571	1.27586	0
166	ACH-000982	GP2D_LARGE_INTESTINE	Colorectal	chr5	1322992	1323026	CLPTM1L	5_1323007_T_C	11	17	306	303	28	609	CCLE_WGS	0.392857	0.502463	0.647059	1.0099	1.56076	1.53678	0
167	ACH-000985	LS411N_LARGE_INTESTINE	Colorectal	chr5	1317859	1318568	CLPTM1L	5_1317949_C_T	27	13	56	12	40	68	CCLE_WGS	0.675	0.823529	2.07692	4.66667	2.24691	2.21891	0
168	ACH-000985	LS411N_LARGE_INTESTINE	Colorectal	chr5	1326376	1326551	CLPTM1L	5_1326476_G_C	61	8	29	0	69	29	CCLE_WGS	0.884058	1	7.625	inf	inf	8.15447	1
169	ACH-000986	HT115_LARGE_INTESTINE	Colorectal	chr5	1326376	1326551	CLPTM1L	5_1326476_G_C	57	9	69	1	66	70	CCLE_WGS	0.863636	0.985714	6.33333	69	10.8947	7.65507	1
170	ACH-000986	HT115_LARGE_INTESTINE	Colorectal	chr5	1326376	1326551	CLPTM1L	5_1326472_C_T	55	9	73	1	64	74	CCLE_WGS	0.859375	0.986486	6.11111	73	11.9455	8.38739	1
171	ACH-000986	HT115_LARGE_INTESTINE	Colorectal	chr5	1338019	1338097	CLPTM1L	5_1338078_C_T	24	10	1325	363	34	1688	CCLE_WGS	0.705882	0.784953	2.4	3.65014	1.52089	1.56278	0
172	ACH-000986	HT115_LARGE_INTESTINE	Colorectal	chr5	1344466	1344566	CLPTM1L	5_1344489_A_G	46	19	1363	322	65	1685	CCLE_WGS	0.707692	0.808902	2.42105	4.23292	1.74838	1.77299	0
173	ACH-000993	JHUEM7_ENDOMETRIUM	Uterus	chr5	1335172	1335289	CLPTM1L	5_1335173_G_A	17	17	277	315	34	592	CCLE_WES	0.5	0.467905	1	0.879365	0.879365	0.879556	0
174	ACH-000993	JHUEM7_ENDOMETRIUM	Uterus	chr5	1338975	1339120	CLPTM1L	5_1339115_G_A	19	13	265	257	32	522	CCLE_WES	0.59375	0.507663	1.46154	1.03113	0.705509	0.713816	0
175	ACH-000995	JURKAT_HAEMATOPOIETIC_AND_LYMPHOID_TISSUE	Blood	chr5	1335172	1335289	CLPTM1L	5_1335219_C_T	64	8	922	82	72	1004	CCLE_WES	0.888889	0.918327	8	11.2439	1.40549	1.47357	0
176	ACH-000995	JURKAT_HAEMATOPOIETIC_AND_LYMPHOID_TISSUE	Blood	chr5	1338975	1339120	CLPTM1L	5_1339115_G_A	12	15	486	352	27	838	CCLE_WES	0.444444	0.579952	0.8	1.38068	1.72585	1.71138	0
177	ACH-000997	HCT15_LARGE_INTESTINE	Colorectal	chr5	1317859	1318568	CLPTM1L	5_1318504_G_A	16	13	327	282	29	609	CCLE_WGS	0.551724	0.536946	1.23077	1.15957	0.942154	0.948512	0
178	ACH-000997	HCT15_LARGE_INTESTINE	Colorectal	chr5	1317859	1318568	CLPTM1L	5_1318506_G_A	13	16	285	312	29	597	CCLE_WGS	0.448276	0.477387	0.8125	0.913462	1.12426	1.11662	0
179	ACH-001129	MONOMAC1_HAEMATOPOIETIC_AND_LYMPHOID_TISSUE	Blood	chr5	1317859	1318568	CLPTM1L	5_1317949_C_T	23	25	22	21	48	43	CCLE_WGS	0.479167	0.511628	0.92	1.04762	1.13872	1.13558	0

## Sheet: CLPTM1L_ASE
Supplementary Table S4f: ASE estimates for CLPTM1L
Collapsed ASE calls for CLPTM1L
Achilles_ID	CCLE_name	Disease	Exon_chromosome	Exon_start	Exon_end	Gene_name	SNP	DNA_ref_count	DNA_alt_count	RNA_ref_count	RNA_alt_count	DNA_total_count	RNA_total_count	DNA_source	DNA_ref_frac	RNA_ref_frac	DNA_ratio	RNA_ratio	RNA_DNA_foldchange	RNA_DNA_foldchange_pseudo	MAE
ACH-001129	MONOMAC1_HAEMATOPOIETIC_AND_LYMPHOID_TISSUE	Blood	chr5	1317859	1318568	CLPTM1L	5_1317949_C_T	23	25	22	21	48	43	CCLE_WGS	0.479167	0.511628	0.92	1.04762	1.13872	1.13558	0
ACH-000997	HCT15_LARGE_INTESTINE	Colorectal	chr5	1317859	1318568	CLPTM1L	5_1318504_G_A	16	13	327	282	29	609	CCLE_WGS	0.551724	0.536946	1.23077	1.15957	0.942154	0.948512	0
ACH-000995	JURKAT_HAEMATOPOIETIC_AND_LYMPHOID_TISSUE	Blood	chr5	1335172	1335289	CLPTM1L	5_1335219_C_T	64	8	922	82	72	1004	CCLE_WES	0.888889	0.918327	8	11.2439	1.40549	1.47357	0
ACH-000993	JHUEM7_ENDOMETRIUM	Uterus	chr5	1335172	1335289	CLPTM1L	5_1335173_G_A	17	17	277	315	34	592	CCLE_WES	0.5	0.467905	1	0.879365	0.879365	0.879556	0
ACH-000986	HT115_LARGE_INTESTINE	Colorectal	chr5	1338019	1338097	CLPTM1L	5_1338078_C_T	24	10	1325	363	34	1688	CCLE_WGS	0.705882	0.784953	2.4	3.65014	1.52089	1.56278	0
ACH-000985	LS411N_LARGE_INTESTINE	Colorectal	chr5	1317859	1318568	CLPTM1L	5_1317949_C_T	27	13	56	12	40	68	CCLE_WGS	0.675	0.823529	2.07692	4.66667	2.24691	2.21891	0
ACH-000982	GP2D_LARGE_INTESTINE	Colorectal	chr5	1322992	1323026	CLPTM1L	5_1323007_T_C	11	17	306	303	28	609	CCLE_WGS	0.392857	0.502463	0.647059	1.0099	1.56076	1.53678	0
ACH-000974	SNGM_ENDOMETRIUM	Uterus	chr5	1326376	1326551	CLPTM1L	5_1326544_C_A	23	26	21	36	49	57	CCLE_WGS	0.469388	0.368421	0.884615	0.583333	0.65942	0.664238	0
ACH-000972	HEC151_ENDOMETRIUM	Uterus	chr5	1334404	1334498	CLPTM1L	5_1334431_C_T	32	23	362	391	55	753	CCLE_WES	0.581818	0.480744	1.3913	0.925831	0.665441	0.669516	0
ACH-000963	CCK81_LARGE_INTESTINE	Colorectal	chr5	1317859	1318568	CLPTM1L	5_1317949_C_T	23	28	20	18	51	38	CCLE_WGS	0.45098	0.526316	0.821429	1.11111	1.35266	1.34388	0
ACH-000945	NCIH650_LUNG	Lung	chr5	1317859	1318568	CLPTM1L	5_1318491_G_A	106	15	807	112	121	919	CCLE_WGS	0.876033	0.878128	7.06667	7.20536	1.01963	1.04465	0
ACH-000943	RKO_LARGE_INTESTINE	Colorectal	chr5	1326130	1326370	CLPTM1L	5_1326163_G_A	21	31	28	18	52	46	CCLE_WGS	0.403846	0.608696	0.677419	1.55556	2.2963	2.25707	0
ACH-000940	AN3CA_ENDOMETRIUM	Uterus	chr5	1317859	1318568	CLPTM1L	5_1317949_C_T	18	13	46	22	31	68	CCLE_WGS	0.580645	0.676471	1.38462	2.09091	1.5101	1.50811	0
ACH-000939	SKUT1_SOFT_TISSUE	Soft tissue	chr5	1317859	1318568	CLPTM1L	5_1317949_C_T	18	20	12	18	38	30	CCLE_WGS	0.473684	0.4	0.9	0.666667	0.740741	0.748722	0
ACH-000936	EFO27_OVARY	Ovary	chr5	1317859	1318568	CLPTM1L	5_1318491_G_A	21	20	170	142	41	312	CCLE_WGS	0.512195	0.544872	1.05	1.19718	1.14017	1.14084	0
ACH-000932	SNU1_STOMACH	Gastric	chr5	1326130	1326370	CLPTM1L	5_1326360_G_A	25	29	31	21	54	52	CCLE_WGS	0.462963	0.596154	0.862069	1.47619	1.71238	1.69494	0
ACH-000930	HCC1569_BREAST	Breast	chr5	1317859	1318568	CLPTM1L	5_1317949_C_T	8	31	13	17	39	30	CCLE_WGS	0.205128	0.433333	0.258065	0.764706	2.96324	2.85882	0
ACH-000928	JHUEM1_ENDOMETRIUM	Uterus	chr5	1317859	1318568	CLPTM1L	5_1317949_C_T	16	15	72	59	31	131	CCLE_WGS	0.516129	0.549618	1.06667	1.22034	1.14407	1.14464	0
ACH-000927	BT474_BREAST	Breast	chr5	1326376	1326551	CLPTM1L	5_1326472_C_T	65	8	11	1	73	12	CCLE_WGS	0.890411	0.916667	8.125	11	1.35385	0.994911	0
ACH-000913	ESS1_ENDOMETRIUM	Uterus	chr5	1338019	1338097	CLPTM1L	5_1338078_C_T	16	18	381	317	34	698	CCLE_WGS	0.470588	0.545845	0.888889	1.20189	1.35213	1.34722	0
ACH-000888	NCIH1793_LUNG	Lung	chr5	1317859	1318568	CLPTM1L	5_1317949_C_T	28	17	35	29	45	64	CCLE_WGS	0.622222	0.546875	1.64706	1.2069	0.732759	0.738924	0
ACH-000883	SW1783_CENTRAL_NERVOUS_SYSTEM	Central nervous system	chr5	1338975	1339120	CLPTM1L	5_1338998_G_A	39	20	794	363	59	1157	CCLE_WGS	0.661017	0.686258	1.95	2.18733	1.12171	1.13435	0
ACH-000879	MFE296_ENDOMETRIUM	Uterus	chr5	1317859	1318568	CLPTM1L	5_1318491_G_A	27	33	248	252	60	500	CCLE_WGS	0.45	0.496	0.818182	0.984127	1.20282	1.19888	0
ACH-000862	KMBC2_URINARY_TRACT	Urinary tract	chr5	1344466	1344566	CLPTM1L	5_1344546_C_T	21	13	202	93	34	295	CCLE_WES	0.617647	0.684746	1.61538	2.17204	1.3446	1.35991	0
ACH-000859	HCC1954_BREAST	Breast	chr5	1335172	1335289	CLPTM1L	5_1335287_G_A	361	45	3946	1	406	3947	CCLE_WGS	0.889163	0.999747	8.02222	3946	491.884	331.149	1
ACH-000856	CAL51_BREAST	Breast	chr5	1317859	1318568	CLPTM1L	5_1317949_C_T	20	12	15	15	32	30	CCLE_WGS	0.625	0.5	1.66667	1	0.6	0.609756	0
ACH-000839	SCABER_URINARY_TRACT	Urinary tract	chr5	1317859	1318568	CLPTM1L	5_1317949_C_T	14	22	16	19	36	35	CCLE_WGS	0.388889	0.457143	0.636364	0.842105	1.32331	1.313	0
ACH-000832	CAL27_UPPER_AERODIGESTIVE_TRACT	Upper aerodigestive	chr5	1317859	1318568	CLPTM1L	5_1317949_C_T	17	21	9	9	38	18	CCLE_WGS	0.447368	0.5	0.809524	1	1.23529	1.22857	0
ACH-000822	SKMEL24_SKIN	Skin	chr5	1317859	1318568	CLPTM1L	5_1317949_C_T	45	24	100	47	69	147	CCLE_WGS	0.652174	0.680272	1.875	2.12766	1.13475	1.13927	0
ACH-000816	NCIH524_LUNG	Lung	chr5	1317859	1318568	CLPTM1L	5_1318491_G_A	55	46	540	302	101	842	CCLE_WGS	0.544554	0.64133	1.19565	1.78808	1.49548	1.49703	0
ACH-000811	SKOV3_OVARY	Ovary	chr5	1335172	1335289	CLPTM1L	5_1335232_G_C	24	21	362	336	45	698	CCLE_WGS	0.533333	0.518625	1.14286	1.07738	0.942708	0.945356	0
ACH-000810	SKMEL30_SKIN	Skin	chr5	1317859	1318568	CLPTM1L	5_1317949_C_T	25	15	29	18	40	47	CCLE_WGS	0.625	0.617021	1.66667	1.61111	0.966667	0.969263	0
ACH-000788	A2058_SKIN	Skin	chr5	1317859	1318568	CLPTM1L	5_1317949_C_T	14	21	44	84	35	128	CCLE_WGS	0.4	0.34375	0.666667	0.52381	0.785714	0.780861	0
ACH-000780	NCIH1105_LUNG	Lung	chr5	1317859	1318568	CLPTM1L	5_1318491_G_A	25	24	247	211	49	458	CCLE_WGS	0.510204	0.539301	1.04167	1.17062	1.12379	1.12432	0
ACH-000763	MM1S_HAEMATOPOIETIC_AND_LYMPHOID_TISSUE	Plasma cell	chr5	1335172	1335289	CLPTM1L	5_1335194_G_A	30	24	2461	2224	54	4685	CCLE_WES	0.555556	0.525293	1.25	1.10656	0.885252	0.888861	0
ACH-000750	LOXIMVI_SKIN	Skin	chr5	1338019	1338097	CLPTM1L	5_1338078_C_T	23	19	391	181	42	572	CCLE_WGS	0.547619	0.683566	1.21053	2.16022	1.78453	1.78987	0
ACH-000749	DMS273_LUNG	Lung	chr5	1317859	1318568	CLPTM1L	5_1317949_C_T	13	13	25	25	26	50	CCLE_WGS	0.5	0.5	1	1	1	1	0
ACH-000747	NCIH1703_LUNG	Lung	chr5	1317859	1318568	CLPTM1L	5_1317949_C_T	34	70	118	142	104	260	CCLE_WGS	0.326923	0.453846	0.485714	0.830986	1.71085	1.69931	0
ACH-000739	HEPG2_LIVER	Liver	chr5	1317859	1318568	CLPTM1L	5_1318491_G_A	18	25	135	99	43	234	CCLE_WGS	0.418605	0.576923	0.72	1.36364	1.89394	1.87709	0
ACH-000725	HCC202_BREAST	Breast	chr5	1317859	1318568	CLPTM1L	5_1317949_C_T	13	33	21	30	46	51	CCLE_WGS	0.282609	0.411765	0.393939	0.7	1.77692	1.74924	0
ACH-000724	HT1376_URINARY_TRACT	Urinary tract	chr5	1317859	1318568	CLPTM1L	5_1317949_C_T	49	25	45	28	74	73	CCLE_WGS	0.662162	0.616438	1.96	1.60714	0.819971	0.822435	0
ACH-000712	HCC1833_LUNG	Lung	chr5	1326376	1326551	CLPTM1L	5_1326541_C_T	12	12	12	11	24	23	CCLE_WGS	0.5	0.521739	1	1.09091	1.09091	1.08696	0
ACH-000703	DMS79_LUNG	Lung	chr5	1326376	1326551	CLPTM1L	5_1326501_T_C	37	10	26	0	47	26	CCLE_WGS	0.787234	1	3.7	inf	inf	14.84	1
ACH-000699	HCC1395_BREAST	Breast	chr5	1331914	1331998	CLPTM1L	5_1331951_C_A	104	65	422	261	169	683	CCLE_WES	0.615385	0.617862	1.6	1.61686	1.01054	1.0127	0
ACH-000691	HCC2157_BREAST	Breast	chr5	1317859	1318568	CLPTM1L	5_1317949_C_T	16	39	12	26	55	38	CCLE_WGS	0.290909	0.315789	0.410256	0.461538	1.125	1.12922	0
ACH-000688	OV7_OVARY	Ovary	chr5	1317859	1318568	CLPTM1L	5_1317949_C_T	29	41	21	23	70	44	CCLE_WGS	0.414286	0.477273	0.707317	0.913043	1.29085	1.28705	0
ACH-000679	OE19_OESOPHAGUS	Esophagus	chr5	1338019	1338097	CLPTM1L	5_1338078_C_T	18	17	187	130	35	317	CCLE_WGS	0.514286	0.589905	1.05882	1.43846	1.35855	1.35912	0
ACH-000669	SW900_LUNG	Lung	chr5	1317859	1318568	CLPTM1L	5_1317949_C_T	19	38	23	68	57	91	CCLE_WGS	0.333333	0.252747	0.5	0.338235	0.676471	0.677335	0
ACH-000668	HCC70_BREAST	Breast	chr5	1326376	1326551	CLPTM1L	5_1326547_G_T	117	9	52	0	126	52	CCLE_WGS	0.928571	1	13	inf	inf	8.48936	1
ACH-000662	CORL23_LUNG	Lung	chr5	1326376	1326551	CLPTM1L	5_1326434_A_G	72	8	31	0	80	31	CCLE_WGS	0.9	1	9	inf	inf	7.38621	1
ACH-000653	JJN3_HAEMATOPOIETIC_AND_LYMPHOID_TISSUE	Plasma cell	chr5	1317859	1318568	CLPTM1L	5_1318491_G_A	51	34	1377	619	85	1996	CCLE_WES	0.6	0.68988	1.5	2.22456	1.48304	1.48957	0
ACH-000647	TE1_OESOPHAGUS	Esophagus	chr5	1326376	1326551	CLPTM1L	5_1326434_A_G	108	8	511	0	116	511	CCLE_WGS	0.931034	1	13.5	inf	inf	80.1429	1
ACH-000635	SNU119_OVARY	Ovary	chr5	1324878	1324928	CLPTM1L	5_1324901_T_C	33	31	497	740	64	1237	CCLE_WGS	0.515625	0.401778	1.06452	0.671622	0.630917	0.631733	0
ACH-000633	FU97_STOMACH	Gastric	chr5	1326376	1326551	CLPTM1L	5_1326547_G_T	98	8	23	1	106	24	CCLE_WGS	0.924528	0.958333	12.25	23	1.87755	1.35195	0
ACH-000632	HS944T_SKIN	Skin	chr5	1317859	1318568	CLPTM1L	5_1318306_A_G	22	10	487	197	32	684	CCLE_WGS	0.6875	0.711988	2.2	2.47208	1.12367	1.1519	0
ACH-000625	HEP3B217_LIVER	Liver	chr5	1344466	1344566	CLPTM1L	5_1344498_C_G	18	23	245	492	41	737	CCLE_WES	0.439024	0.332429	0.782609	0.497967	0.636292	0.633201	0
ACH-000616	HS746T_STOMACH	Gastric	chr5	1322992	1323026	CLPTM1L	5_1322998_C_T	15	17	267	265	32	532	CCLE_WGS	0.46875	0.50188	0.882353	1.00755	1.14189	1.13754	0
ACH-000614	RVH421_SKIN	Skin	chr5	1317859	1318568	CLPTM1L	5_1317949_C_T	18	18	12	21	36	33	CCLE_WGS	0.5	0.363636	1	0.571429	0.571429	0.581395	0
ACH-000610	NCIH2227_LUNG	Lung	chr5	1317859	1318568	CLPTM1L	5_1317949_C_T	21	29	38	29	50	67	CCLE_WGS	0.42	0.567164	0.724138	1.31034	1.80952	1.7907	0
ACH-000608	COV644_OVARY	Ovary	chr5	1317859	1318568	CLPTM1L	5_1317949_C_T	31	12	9	3	43	12	CCLE_WGS	0.72093	0.75	2.58333	3	1.16129	1.0771	0
ACH-000601	MIAPACA2_PANCREAS	Pancreas	chr5	1317859	1318568	CLPTM1L	5_1317949_C_T	35	16	83	25	51	108	CCLE_WGS	0.686275	0.768519	2.1875	3.32	1.51771	1.52196	0
ACH-000594	DMS153_LUNG	Lung	chr5	1317859	1318568	CLPTM1L	5_1317949_C_T	25	17	75	29	42	104	CCLE_WGS	0.595238	0.721154	1.47059	2.58621	1.75862	1.7564	0
ACH-000587	NCIH1975_LUNG	Lung	chr5	1317859	1318568	CLPTM1L	5_1317949_C_T	14	28	22	21	42	43	CCLE_WGS	0.333333	0.511628	0.5	1.04762	2.09524	2.05694	0
ACH-000586	NCIH1876_LUNG	Lung	chr5	1317859	1318568	CLPTM1L	5_1318457_C_T	16	32	145	262	48	407	CCLE_WGS	0.333333	0.356265	0.5	0.553435	1.10687	1.09177	0
ACH-000582	COLO741_SKIN	Skin	chr5	1317859	1318568	CLPTM1L	5_1317949_C_T	16	29	41	30	45	71	CCLE_WGS	0.355556	0.577465	0.551724	1.36667	2.47708	2.43269	0
ACH-000579	UACC257_SKIN	Skin	chr5	1317859	1318568	CLPTM1L	5_1317949_C_T	16	9	28	17	25	45	CCLE_WGS	0.64	0.622222	1.77778	1.64706	0.926471	0.937662	0
ACH-000574	FUOV1_OVARY	Ovary	chr5	1317859	1318568	CLPTM1L	5_1317949_C_T	16	16	43	34	32	77	CCLE_WGS	0.5	0.558442	1	1.26471	1.26471	1.26087	0
ACH-000551	K562_HAEMATOPOIETIC_AND_LYMPHOID_TISSUE	Blood	chr5	1317859	1318568	CLPTM1L	5_1318491_G_A	30	29	148	153	59	301	CCLE_WES	0.508475	0.491694	1.03448	0.96732	0.935076	0.935708	0
ACH-000550	IGR39_SKIN	Skin	chr5	1317859	1318568	CLPTM1L	5_1317949_C_T	15	19	24	23	34	47	CCLE_WGS	0.441176	0.510638	0.789474	1.04348	1.32174	1.3116	0
ACH-000536	BT20_BREAST	Breast	chr5	1326376	1326551	CLPTM1L	5_1326472_C_T	130	16	186	1	146	187	CCLE_WGS	0.890411	0.994652	8.125	186	22.8923	15.7203	1
ACH-000525	NCIH2171_LUNG	Lung	chr5	1317859	1318568	CLPTM1L	5_1317949_C_T	26	29	22	34	55	56	CCLE_WGS	0.472727	0.392857	0.896552	0.647059	0.721719	0.726005	0
ACH-000519	PEER_HAEMATOPOIETIC_AND_LYMPHOID_TISSUE	Blood	chr5	1325866	1325931	CLPTM1L	5_1325874_C_T	38	27	549	435	65	984	CCLE_WES	0.584615	0.557927	1.40741	1.26207	0.896733	0.901263	0
ACH-000511	CALU1_LUNG	Lung	chr5	1317859	1318568	CLPTM1L	5_1317949_C_T	41	14	51	9	55	60	CCLE_WGS	0.745455	0.85	2.92857	5.66667	1.93496	1.8941	0
ACH-000493	SNU423_LIVER	Liver	chr5	1326376	1326551	CLPTM1L	5_1326502_C_A	38	12	26	9	50	35	CCLE_WGS	0.76	0.742857	3.16667	2.88889	0.912281	0.905673	0
ACH-000492	MUTZ5_HAEMATOPOIETIC_AND_LYMPHOID_TISSUE	Blood	chr5	1322992	1323026	CLPTM1L	5_1322993_G_A	82	75	495	421	157	916	CCLE_WES	0.522293	0.540393	1.09333	1.17577	1.0754	1.07582	0
ACH-000464	CAS1_CENTRAL_NERVOUS_SYSTEM	Central nervous system	chr5	1317859	1318568	CLPTM1L	5_1317949_C_T	24	19	26	29	43	55	CCLE_WGS	0.55814	0.472727	1.26316	0.896552	0.70977	0.714978	0
ACH-000457	CAL54_KIDNEY	Kidney	chr5	1317859	1318568	CLPTM1L	5_1317949_C_T	18	15	10	6	33	16	CCLE_WGS	0.545455	0.625	1.2	1.66667	1.38889	1.35343	0
ACH-000454	HCC95_LUNG	Lung	chr5	1317859	1318568	CLPTM1L	5_1317949_C_T	14	48	46	47	62	93	CCLE_WGS	0.225806	0.494624	0.291667	0.978723	3.35562	3.27441	0
ACH-000429	A704_KIDNEY	Kidney	chr5	1326376	1326551	CLPTM1L	5_1326443_C_A	16	19	48	40	35	88	CCLE_WGS	0.457143	0.545455	0.842105	1.2	1.425	1.41526	0
ACH-000427	NCIN87_STOMACH	Gastric	chr5	1317859	1318568	CLPTM1L	5_1317949_C_T	16	15	81	54	31	135	CCLE_WGS	0.516129	0.6	1.06667	1.5	1.40625	1.40478	0
ACH-000422	SNU475_LIVER	Liver	chr5	1317859	1318568	CLPTM1L	5_1317949_C_T	10	19	18	32	29	50	CCLE_WGS	0.344828	0.36	0.526316	0.5625	1.06875	1.05714	0
ACH-000411	769P_KIDNEY	Kidney	chr5	1317859	1318568	CLPTM1L	5_1317949_C_T	12	10	21	17	22	38	CCLE_WGS	0.545455	0.552632	1.2	1.23529	1.02941	1.032	0
ACH-000395	NCIH520_LUNG	Lung	chr5	1326376	1326551	CLPTM1L	5_1326434_A_G	48	8	25	0	56	25	CCLE_WGS	0.857143	1	6	inf	inf	8.93814	1
ACH-000364	U2OS_BONE	Bone	chr5	1317859	1318568	CLPTM1L	5_1317949_C_T	21	24	80	61	45	141	CCLE_WGS	0.466667	0.567376	0.875	1.31148	1.49883	1.49159	0
ACH-000360	NCIH508_LARGE_INTESTINE	Colorectal	chr5	1317859	1318568	CLPTM1L	5_1317949_C_T	26	39	49	57	65	106	CCLE_WGS	0.4	0.462264	0.666667	0.859649	1.28947	1.28318	0
ACH-000358	NCIH69_LUNG	Lung	chr5	1317859	1318568	CLPTM1L	5_1317949_C_T	19	18	23	16	37	39	CCLE_WGS	0.513514	0.589744	1.05556	1.4375	1.36184	1.3512	0
ACH-000356	MKN45_STOMACH	Gastric	chr5	1317859	1318568	CLPTM1L	5_1317949_C_T	20	44	29	47	64	76	CCLE_WGS	0.3125	0.381579	0.454545	0.617021	1.35745	1.34814	0
ACH-000354	CAPAN1_PANCREAS	Pancreas	chr5	1317859	1318568	CLPTM1L	5_1317949_C_T	38	25	67	27	63	94	CCLE_WGS	0.603175	0.712766	1.52	2.48148	1.63255	1.62574	0
ACH-000334	DB_HAEMATOPOIETIC_AND_LYMPHOID_TISSUE	Lymphocyte	chr5	1317859	1318568	CLPTM1L	5_1317949_C_T	20	21	40	21	41	61	CCLE_WGS	0.487805	0.655738	0.952381	1.90476	2	1.97561	0
ACH-000308	EFO21_OVARY	Ovary	chr5	1317859	1318568	CLPTM1L	5_1317949_C_T	66	20	72	17	86	89	CCLE_WGS	0.767442	0.808989	3.3	4.23529	1.28342	1.27712	0
ACH-000270	HPAC_PANCREAS	Pancreas	chr5	1326376	1326551	CLPTM1L	5_1326472_C_T	129	17	225	1	146	226	CCLE_WGS	0.883562	0.995575	7.58824	225	29.6512	20.3153	1
ACH-000260	SKNAS_AUTONOMIC_GANGLIA	Peripheral nervous system	chr5	1317859	1318568	CLPTM1L	5_1317949_C_T	15	12	40	36	27	76	CCLE_WGS	0.555556	0.526316	1.25	1.11111	0.888889	0.89483	0
ACH-000243	DANG_PANCREAS	Pancreas	chr5	1326376	1326551	CLPTM1L	5_1326472_C_T	45	8	85	2	53	87	CCLE_WGS	0.849057	0.977011	5.625	42.5	7.55556	6.38901	1
ACH-000238	SCC4_UPPER_AERODIGESTIVE_TRACT	Upper aerodigestive	chr5	1326376	1326551	CLPTM1L	5_1326476_G_C	127	8	96	2	135	98	CCLE_WGS	0.940741	0.979592	15.875	48	3.02362	2.57333	0
ACH-000211	DAOY_CENTRAL_NERVOUS_SYSTEM	Central nervous system	chr5	1317859	1318568	CLPTM1L	5_1317949_C_T	20	14	16	14	34	30	CCLE_WGS	0.588235	0.533333	1.42857	1.14286	0.8	0.804878	0
ACH-000207	DETROIT562_UPPER_AERODIGESTIVE_TRACT	Upper aerodigestive	chr5	1317859	1318568	CLPTM1L	5_1317949_C_T	41	44	48	22	85	70	CCLE_WGS	0.482353	0.685714	0.931818	2.18182	2.34146	2.31138	0
ACH-000201	A204_SOFT_TISSUE	Soft tissue	chr5	1338019	1338097	CLPTM1L	5_1338078_C_T	15	23	207	201	38	408	CCLE_WGS	0.394737	0.507353	0.652174	1.02985	1.5791	1.56127	0
ACH-000196	HCC1599_BREAST	Breast	chr5	1326376	1326551	CLPTM1L	5_1326472_C_T	49	8	55	1	57	56	CCLE_WGS	0.859649	0.982143	6.125	55	8.97959	6.35354	1
ACH-000187	CORL311_LUNG	Lung	chr5	1317859	1318568	CLPTM1L	5_1317949_C_T	20	19	25	26	39	51	CCLE_WGS	0.512821	0.490196	1.05263	0.961538	0.913462	0.915324	0
ACH-000184	HS343T_FIBROBLAST	Fibroblast	chr5	1322992	1323026	CLPTM1L	5_1322993_G_A	54	53	279	268	107	547	CCLE_WES	0.504673	0.510055	1.01887	1.04104	1.02177	1.02187	0
ACH-000163	SW579_THYROID	Thyroid	chr5	1317859	1318568	CLPTM1L	5_1317949_C_T	13	16	16	14	29	30	CCLE_WGS	0.448276	0.533333	0.8125	1.14286	1.40659	1.3908	0
ACH-000145	SKLMS1_SOFT_TISSUE	Soft tissue	chr5	1317859	1318568	CLPTM1L	5_1317949_C_T	11	15	14	18	26	32	CCLE_WGS	0.423077	0.4375	0.733333	0.777778	1.06061	1.0564	0
ACH-000140	PFEIFFER_HAEMATOPOIETIC_AND_LYMPHOID_TISSUE	Lymphocyte	chr5	1317859	1318568	CLPTM1L	5_1318491_G_A	41	21	712	298	62	1010	CCLE_WES	0.66129	0.70495	1.95238	2.38926	1.22377	1.2366	0
ACH-000133	HS729_SOFT_TISSUE	Fibroblast	chr5	1335172	1335289	CLPTM1L	5_1335196_C_T	34	27	442	365	61	807	CCLE_WES	0.557377	0.547708	1.25926	1.21096	0.961644	0.965027	0
ACH-000125	TO175T_FIBROBLAST	Fibroblast	chr5	1335172	1335289	CLPTM1L	5_1335280_G_A	46	41	69	101	87	170	CCLE_WES	0.528736	0.405882	1.12195	0.683168	0.608911	0.611102	0
ACH-000117	EFM192A_BREAST	Breast	chr5	1317859	1318568	CLPTM1L	5_1317949_C_T	24	25	31	22	49	53	CCLE_WGS	0.489796	0.584906	0.96	1.40909	1.4678	1.45714	0
ACH-000112	SIGM5_HAEMATOPOIETIC_AND_LYMPHOID_TISSUE	Blood	chr5	1317859	1318568	CLPTM1L	5_1318491_G_A	31	26	213	199	57	412	CCLE_WES	0.54386	0.51699	1.19231	1.07035	0.897714	0.900306	0
ACH-000086	ACCMESO1_PLEURA	Lung	chr5	1323902	1323984	CLPTM1L	5_1323961_C_T	30	53	346	789	83	1135	CCLE_WES	0.361446	0.304846	0.566038	0.43853	0.774736	0.769848	0
ACH-000075	U87MG_CENTRAL_NERVOUS_SYSTEM	Central nervous system	chr5	1317859	1318568	CLPTM1L	5_1318306_A_G	14	14	193	184	28	377	CCLE_WGS	0.5	0.511936	1	1.04891	1.04891	1.04878	0
ACH-000053	KARPAS299_HAEMATOPOIETIC_AND_LYMPHOID_TISSUE	Lymphocyte	chr5	1317859	1318568	CLPTM1L	5_1317949_C_T	21	9	19	17	30	36	CCLE_WGS	0.7	0.527778	2.33333	1.11765	0.478992	0.492359	0
ACH-000035	NCIH1650_LUNG	Lung	chr5	1335172	1335289	CLPTM1L	5_1335280_G_A	19	71	314	1183	90	1497	CCLE_WGS	0.211111	0.209753	0.267606	0.265427	0.991858	0.97437	0
ACH-000027	GOS3_CENTRAL_NERVOUS_SYSTEM	Central nervous system	chr5	1317859	1318568	CLPTM1L	5_1318491_G_A	23	23	174	146	46	320	CCLE_WES	0.5	0.54375	1	1.19178	1.19178	1.19113	0
ACH-000024	OPM2_HAEMATOPOIETIC_AND_LYMPHOID_TISSUE	Plasma cell	chr5	1317859	1318568	CLPTM1L	5_1318443_C_T	46	9	1760	165	55	1925	CCLE_WGS	0.836364	0.914286	5.11111	10.6667	2.08696	2.17324	0
ACH-000023	PATU8988T_PANCREAS	Pancreas	chr5	1326376	1326551	CLPTM1L	5_1326472_C_T	65	8	2899	10	73	2909	CCLE_WGS	0.890411	0.996562	8.125	289.9	35.68	35.8353	1
ACH-000021	NCIH1693_LUNG	Lung	chr5	1338019	1338097	CLPTM1L	5_1338078_C_T	36	16	650	435	52	1085	CCLE_WGS	0.692308	0.599078	2.25	1.49425	0.664112	0.675228	0
ACH-000018	T24_URINARY_TRACT	Urinary tract	chr5	1338019	1338097	CLPTM1L	5_1338078_C_T	40	8	422	181	48	603	CCLE_WGS	0.833333	0.699834	5	2.33149	0.466298	0.488556	0
ACH-000009	C2BBE1_LARGE_INTESTINE	Colorectal	chr5	1317859	1318568	CLPTM1L	5_1318491_G_A	33	16	500	173	49	673	CCLE_WGS	0.673469	0.742942	2.0625	2.89017	1.4013	1.42084	0
