# Supplementary material for: Integrated evaluation of telomerase activation and telomere maintenance across cancer cell lines
Source: eLife. 2021 Sep 6;10:e66198. doi: 10.7554/eLife.66198 (PMC8530513; doi:10.7554/eLife.66198)
Supplement: Supplementary file 5. [file elife-66198-supp5.xlsx]

## Sheet: TERT_CpG_ASM
Supplementary Table S5a: CpG-pair allele-specific methylation at the TERT locus
CpG-pair RRBS ASM estimates for TERT within 5kb of the gene start and end
Achilles_ID	chr5_1249661+	chr5_1249671+	chr5_1249861-	chr5_1249864-	chr5_1250240+	chr5_1250280-	chr5_1250292-	chr5_1250308-	chr5_1251249-	chr5_1251252+	chr5_1251253-	chr5_1251716+	chr5_1251867-	chr5_1251871-	chr5_1251877-	chr5_1251880-	chr5_1251884-	chr5_1251928+	chr5_1252111-	chr5_1252123-	chr5_1252127-	chr5_1253548+	chr5_1253655-	chr5_1253670-	chr5_1253688+	chr5_1253703+	chr5_1253760-	chr5_1253779-	chr5_1253787+	chr5_1253788-	chr5_1253790+	chr5_1253879-	chr5_1253917+	chr5_1253927+	chr5_1253938+	chr5_1254014-	chr5_1254026-	chr5_1254374+	chr5_1254380+	chr5_1254590+	chr5_1254593+	chr5_1254596+	chr5_1254612+	chr5_1254682-	chr5_1255602+	chr5_1255615+	chr5_1256759+	chr5_1256870-	chr5_1257562+
ACH-000001	0.799805	0.342773	0.887695	0.852051	0.419434	0.438965	0.0952148	0.0476074	0.571289	0.846191	0.619141	0.109253	0.350098	0.899902	0.350098	0.5	0.199951	0.25	0.525391	0.830566	0.707031	0.890625	0.881348	0.899902	0.936523	0.909668	0.913574	0.913574	0.727051	0.98291	0.523926	0.885742	0.981445	1	0.90918	0.89209	0.756836	0.333252	0.733398	1	0.600098	0.933105	0.8125	1	0.353027	0.529297	0.416748	0.688965	0.960449
ACH-000002	0.394775	0.0789185	0.730957	1	0.0666504	0.153809	0	0	0.350098	0.944336	0.799805	0.928711	0.8125	0.9375	0.375	0.75	0.25	0.571289	0.893555	0.680664	0.915039	0.692383	0.729492	1	0.98291	0.931152	0.931152	1	0.95459	0.766602	0.818359	0.950195	1	0.976074	0.975586	0.828613	0.542969	0.958496	0.916504	1	1	0.916504	1	1	0.5	1	1	0.737793	1
ACH-000004	0.538574	0.0943604	0.0638428	0.127686	0.0625	0.0810547	0	0.0789185	0.241333	0.353027	0.275879	0.333252	0.162109	0.459473	0.297363	0.378418	0.378418	0.0952148	0.188721	0.1698	0.434082	0.344727	0.253662	0.298584	0.70459	0.477295	0.563477	0.563477	0.582031	0.49292	0.345459	0.489746	0.78125	0.967773	0.871094	0.244385	0.277832	0.5625	0.4375	0.758789	0.482666	0.655273	0.51709	0.773438	0.333252	0.388916	0.272705	0.189209	0.944336
ACH-000005	0.118408	0	0	0.0800171	0.125	0.161255	0.161255	0.129028	0.0666504	0.192261	0.0666504	0.224976	0.020401	0.0212708	0.102051	0.216553	0.346924		0.0655518	0	0.196777	0.630371	0	0	0.82666	0.613281	1	0.927246	0.910645	0.927246	0.403564	0.692383	0.90918	0.910156	0.799805	0	0	0.666504	0.799805	0.305664	0.309814	0.197144	0.0416565	0.555664	0.799805	0.0800171	0.0598145	0.519043	0.966309
ACH-000006			0	0															0.00307655	0	0												0.99707	1	0.99707
ACH-000007	0.410645	0.145142	0.532227	0.983887	0.860352	0.692383	0.230713	0.47998	0.814941	0.84375	1	0.25	0	0.295898	0	0.224487	0.0714111	0.184204	0.112366	0.0112381	0.235962	0.406006	0.917969	0.986328	0.917969	0.983398	0.986816	0.961426	0.760742	0.856934	0.739258	1	1	1	0.904785	0.944336	1	0.799805	0.638184	1	0.983398	0.966797	0.868652	0.967773	0.741211	0.626953	0.496094	0.521484	1
ACH-000008	0	0	0	0	0.0196075	0	0	0	0.0476074	0.0491943	0.0476074	0.0104141	0	0	0	0	0	0	0.0253143	0	0.0128174	0.141235	0.161743	0.171387	0.192261	0.207764	0.339355	0.267822	0.285645	0.107117	0	0.153809	0.317139	0.902344	0.902344	0.353027	0.529297	0.0727539	0.055542	0	0	0	0	0	0.300049	0.382324	0.115967	0.180298	0.213623
ACH-000009	0.71875	0.625	0.804688	1	0.846191	0.62207	0.3479	0.444336	1	0.977051	1	0.162842	0	0.069458	0	0.083313	0.0138855	0.111084	0	0.344727	0.482666	0.79541	0.896484	0.98291	1	0.931641	0.692383	0.804688		1		0.615234	1	1	0.989746	0.966797	0.933105	0.75	0.75	1	1	1	0.9375	0.703613	0.956543	0.95459	0.846191	0.913086	0.850098
ACH-000011																		0.933105				0.95459			0.9375	0.875	0.922852	0.916504	1	1	0.982422																0.916504	0.986816
ACH-000012	0.606934	0.213501	0.13269	0.252441	0.0784302	0.105286	0	0.131592	0.5	0.466553	0.444336	0.790039	0.461426	0.897461	0.621582	0.702637	0.378418	0.0908813	0.213379	0.337891	0.162109	0.377197	0.518555	0.626953	0.915039	0.659668	0.894531	0.991211	0.827637	0.948242	0.758789	0.370361	0.947754	0.978516	0.95752	0.552734	0.657715	0.734863	0.25	0.444336	0.631348	0.789551	0.842285	0.736816	1	0.906738	0.455078	0.457275	0.958984
ACH-000013	0.538574	0.322998	0.961426	0.519043	0.666504	0.75	0	0.083313	0.611328	0.645996	0.611328	0.204346	0.34375	0.562988	0.219727	0.426025	0.219727	0.0875244	0.0841064	0.205566	0.177612	0.569336	0.342285	0.375	0.942383	0.759766	0.671875	0.70166	0.735352	0.880371	0.294189	0.645508	0.967773	1	0.742188	0.355469	0.438965			0.846191	0.82373	0.764648	0.706055	0.1875	0.464355	0.535645	0.442139	0.587402	0.991699
ACH-000014	0.161255	0.22583	0.129028	0.129028	0.125	0.290283	0.34375	0.137939	0.320068	0.350098	0.280029	0.128662	0.242432	0.5	0.242432	0.515137	0.030304	0.399902	0.0952148	0.19043	0.19043	0.28125	0.379639	0.378418	0.318604	0.362549	0.386719	0.320068	0.145142	0.243286	0.131104	0.537598	0.47168	0.622559	0.622559	0.415771	0.37085	0.166626	0.208374	0.297363	0.351318	0.297363	0.486572	0.0769043	0.260986	0.217407	0.287598	0.232178	0.384033
ACH-000015					0.996094																								1		1	1																	1
ACH-000017	0.148926	0	0	0	0	0.0625	0	0	0.0999756	0.230713	0.0999756	0.141235	0.055542	0.027771	0	0	0.055542	0.0588379	0.0769043	0.153809	0.307617	0.51123	0.494141	0.51123	0.515625	0.326416	0.575195	0.349365	0.45459	0.421631	0.350098	0.605469	0.338623	0.725586	0.698242	0.5625	0.4375	0.235352	0	0.184204	0.157837	0.184204	0.105286	0.0540466	0.268311	0.317139	0.421631	0.404053	0.705566
ACH-000018	0.228516	0	0	0.266602	0.3479				0.0416565	0.193604	0.0416565	0	0	0.272705	0.0449524	0.0786743	0.0112381	0	0.0400085	0	0.219971	0.228027	0.280029	0.560059	0.630371	0.456543	0.406738	0.541016	0.289551	0.360596	0.378418	0.360107	1	1	0.894531	0	0	0.5625	0.5625	0.222168	0.222168	0.222168	0		0	0	0.31958	0.327881	1
ACH-000019	0.734863	0.590332	0.559082	0.687988	0.264648	0.584961	0.245239	0.3396	0.856934	0.837402	0.952148	0.561523	0.0980225	0.656738	0.294189	0.401855	0.15686	0.196777	0.230713	0.558594	0.818359	0.86377	0.813477	0.847656	0.73584	0.885254	0.983398	0.983398	0.938965	0.966797	0.877441	0.63623	0.894043	1	0.882324	0.788574	0.865234	0.781738	0.854492	0.793945	0.853027	0.882324	0.706055	0.833496	1	0.850586	0.687988	0.922852	0.861816
ACH-000020									1		1	0.833496	0.970703	0.971191	0.971191	0.885742	0.971191					1			1	1	0.899902	0.818359		0.727051		0.928711	1	1	0.777832			0.789551	1	0.0416565	0.577148	0.807617	0.807617	0.75	0.0444336	0.955566	0.917969	0.960449
ACH-000021																		0				1													0			0.00345993	0.00347137
ACH-000022	1	0.856934	0	0		0.649902	0.649902	1	0.555664	0.491699	0.5	0.0875854	0	0.811035	0	0.432373	0	0	0.516602	0.350098	0.766602	0.202393	0.394775	0.920898	0.848633	0.574707	1	0.357178		0.643066			0.820801	1	0.916504	0	0							0.964355	0.605469	0.605469	0.231445	0.281982	1
ACH-000023	0.666504	0.481445	0.763672	0.736328	0.666504	0.413086	0.478271	0.434814	0.357178	0.803711	0.714355	0.548828	0.656738	0.97998	0.717285	0.788086	0.767578	0.418701	0.785156	0.891113	0.891113	0.606445	0.79834	0.991699	0.811035	0.657715	0.972168	0.890137	0.850098	0.935547	0.899902	0.918945	0.966309	0.92041	0.965332	0.751465	0.686523	1	1	0.829102	0.333252	0.80957	0.976074	0.905762	0.984863	0.94043	0.506836	0.788574	1
ACH-000024	0.279053	0.279053	0.181763	0.45459	0.577637	0.423096	0.407471	0.444336	0.941406	0.350098	0.941406	0.346191	0.45459	0.757812	0.394043	0.54541	0.727051	0.291748	0.214233	0.214233	0.25	0.125	0.373779	0.428467	0.474365	0.384521	0.399902	0.984863	0.625	0.656738	0.40625	0.688965	0.788574	0.961426	0.980469	0.3125	0.416748	0.333252	0.25	0.75	0.649902	0.649902	0.549805	0.59082	0.727051	0.428467	0.0908813	0.506348	1
ACH-000026	0.128784	0	0	0	0	0	0.055542	0.117676	0.0434875	0.192993	0.083313	0.00450516	0	0.318848	0.0617371	0	0.00617218	0.0344849	0	0	0.00584793	0.72168	0.192749	0.296387	0.305908	0.258301	0.496826	0.505859	0.579102	0.333252	0.193604	0.326416	0.94043	0.620605	0.387451	0.00704193	0.0211334	0.111084	0.142822	0.196045	0.360107	0.280029	0.137207	0.57373	0.00892639	0	0.0462952	0.318848	0.938477
ACH-000027	0.145142	0.174561			0.03125	0	0	0.105286	0.0526428	0.363525	0.131592	0.441895	0.5	1	1	1	0.5625	0	0.25	0.210571	0.947266	0.769043	0.448242	1	0.979004	0.75	1	1	1	0.703613	1	0.435547	1	1	1	0.202148	0.340332	1	1					0.783691	0.615234	0.384521	0.407471	0.669434	0.160034
ACH-000028	0.956543	0.695801	0.672363	0.333252	0.8125	0.681641	0.272705	0.5	0.736816	0.606934	0.473633	0.571289	0.458984	0.983398	0.360596	0.557617	0.237305	0.387207	0.769043	1	0.846191	0.871582	0.872559	0.910645	1	1	1	1	0.96875	1	0.96875	1	1	1	0.975586	0.689453	0.965332	1	0.888672	1	0.9375	0.9375	1	1	1	0.846191	0.906738	0.716309	0.854004
ACH-000030
ACH-000031	1	0.560059	0.3125	0.0208282	0.772949	0.0169525	0.310303	0.965332	0.953613	0.955078	1	0.0350952	0.0731812	0.634277	0.219482	0.283936	0.0853882	0	0.315674	0.407959	0.697266	0.896484	0.854004	0.966309	0.987305	0.850098	1	0.942871	0.922852	0.97168	0.942383	1	1	1	0.897461	0.938965	0.877441	1	1	1	1	1	0.935547		0.826172	0.847656	0.81543	0.875977	0.90332
ACH-000032					1	0.899902	0.899902	0.899902	1		1	1	1	1	1	1	1		0.856934	0.769043	0.922852	1			0.700195	1	0.692383	0.961426	1	0.959961	1	1	1	1	1	0.967773	0.981445	1	1					1			0.932129	0.964355	1
ACH-000035	1	0.865723			0.083313	0	0	0.0294189	0.742676	0.640137	0.542969	0.416748	0.277832	0.944336	0.138916	0.361084	0.305664	0.297363	0.0499878	0.950195	1	1	0.976074	0.976074	0.730957	0.730957	0.844238	1	1	0.630371	1		0.944336	0.462891	0.981445	0.899902	0.987305			0.98584	0.98584	0.98584	0.328613	1			0.340088	0.802734	0.919434
ACH-000037					0	0	0	0.0755005	0	0.799805	0	0							0	0	0	0.175049	0	0	0.542969	0.271484	0.916504	0		0		1	1	1	1					0	0	0	0	0	0.055542	1	0.0357056	0.216431	0.509277
ACH-000038	0.0158691	0	0.0625	0.125	0	0	0	0.0208282	0.0714111		0.0689697	0	0	0	0	0.0117645	0	0	0.0908813	0.300049	0.300049	0	0	0.177734	0	0	0.129028	0.46875	0.314209	0	0	0	0.0327759	0.557617	0.705078	0	0.0499878	0.09375	0.09375	0	0	0	0.311035	0.0178528	0	0	0	0.172363	1
ACH-000039	0.483887	0.09375	0	0	0.0908813	0	0.0322571	0.0666504		0.40918		0	0	0.0416565	0	0	0	0.0625	0	0	0.416748	0.769043	0.0128174	0.0249939	0	0.0531921	0.554199	0.797852	0.304443	0.321533	0	0.0232544	0.0571289	0.285645	0.12854	0.0116272	0.0697632	0.899902	0.799805	0.166626	0.055542	0.055542	0.055542	0.680176	0.19043	0.0952148	0.550781	0.490234	0.961914
ACH-000040	0.272705	0.0340881	0	0	0.1875	0	0.125	0.210571	0.333252	0.333252	0.208374	0.516113	0.083313	0.353027	0.142822	0.353027	0.277832	0.111084	0.318115	0.199951	0.307617	0.294678	0.0793457	0.355469	0.461426	0.23877	0.57373	0.617676	0.408203	0.484863	0.15686	0.127686	0.965332	0.95166	0.904785	0.10144	0.130493	0.0192261	0.0192261	0.600098	0.625	0.6875	0.5625	0.799805	0.235352	0.0606079	0.330322	0.253418	0.834473
ACH-000041	0	0	0.125	0.125	0.5				0	0.133301	0	1	0.652832	1	0	0	0	0				0	0	0.0172424	0	0.224976	0.75	0.875	0.689453	0.589355	1	0.166626	0.740723	1	0.259277					0	1	1	1	0.333252			0.421631	0.262451
ACH-000042	0.90918	0.54541	0.807617	1		0.4375	0.5625	1	0.375	0.666504	0.125	0.0652466	0.130493	0.217407	0.260986	0.17395	0.130493	0.111084	0.130493	0.0434875	0.130493	0.852051	1	0.962891	1	0.888672	1	0.888672	1	1	1	1	1	1	0.260986	0.833496	0.666504	1	0.941406					1	1	1	0.825195	0.163208	0.94873
ACH-000044	0.868652	0.579102	0.54834	0.45166	0.821289	0.684082	0.473633	0.736816	0.722168	0.839844	0.944336	0.95752	0.380859	0.952148	0.666504	0.761719	0.238037	0.680176	0.950195	0.850098	0.975098	0.9375	1	1	1	0.941406	0.956543	0.955566	0.956055	0.844238	0.985352	0.981934	1	0.978027	0.93457	1	1	1	0.904785	1	1	1	0.871094	1	0.966797	0.766602	0.727051	0.919922	0.969727
ACH-000045	0.424072	0.0103455	0.0466614	0.0540466	0.185669	0	0	0.0175476	0.207764	0.125854	0.256836	0.204712	0.147949	0.5	0.341797	0.538574	0.31958	0.0625	0.146606	0.0340271	0.115662	0.183228	0.333252	0.629883	0.304443	0.103271	0.30835	0.683594	0.75	0.586426	0.405518	0.669434	0.912598	0.993164	0.75	0.106812	0.14563	0.177979	0.0427246	0.171997	0.439453	0.434814	0.142822	0.34375	0.415527	0.114929	0.238037	0.326172	0.996094
ACH-000046	1	0.928711	1	1	0.733398	0.856934	0.928711	0.928711	0.799805	0.882324	0.833496	1	0.466553	0.866699	0.799805	1	1	1	1	1	1	1	1	1	0.902344	0.829102	0.970703	0.985352	1	0.970703	1	1	1	1	0.96875	0.913086	0.818359	0.925781	1	0.0714111	0.533203	0.933105	0.933105	1	1	1	0.829102	0.976074	0.9375
ACH-000047	0.116272	0.186035	0.413086	0.191528	0.0645142	0.17395	0.083313	0.166626	0.130493	0.296387	0.217407	0.0789185	0.0461426	0.507812	0.0307617	0.375	0.0615234	0.105286	0.0657959	0.131592	0.171021	0.479248	0.702148	0.595703	0.770996	0.807617	0.541504	0.459961	0.440674	0.560059	0.745605	0.595703	0.558594	1	0.666504	0.683105	0.634277	0.588379	0.470703	0.555664	0.714355	0.571289	0.392822	0.366699	0.609863	0.700195	0.3479	0.329346	0.975586
ACH-000048	0.45459	0.666504	0.928711	0.785645	0.666504					0.807617		0.510742	0.777832	1	0.861328	0.916504	0.833496	1	0.964355	0.785645	0.964355	1	0.899902	1	0.980957	1	1	1	1	0.956543	0.806641	1	0.984863	0.984863	0.94043	0.818359	0.981934	1	0.799805	0.842285	0.944336	1	1	0.888672	0.866699	0.799805	0.9375	0.98291	0.878906
ACH-000050	0.875	0.541504	0.799805	0.774414	0.958496	0.846191	0.615234	0.916504	0.526367	0.622559	0.600098	0.422363	0.725586	0.960938	0.899902	0.680176	0.803711	0.799805	0.769043	0.777832	0.814941	0.632324	0.680664	0.849121	0.882812	0.785156	0.873047	0.984863	0.945801	0.953613	0.916504	0.878906	0.866699	0.918945	0.868652	0.844727	0.792969	0.666504	0.646973	0.941406	0.888672	0.777832	0.944336	0.888672	0.947266	0.910645	0.632812	0.562988	0.902344
ACH-000051	0.956543	0.391357	1	1	1	0.0476074	0.0476074	0	1	0.5	1	0.5	1	1	0.803711	1	0.548828	1	0.25	0.75	1	1			0.444336	0.888672	0.844727	1	0	0.847656	0.583496	1	1	1	0.944336	1	1	1	1	0.651367	1	1	0.837402	0.666504			0.659668	0.761719	1
ACH-000052	0.0521851	0.0869751	0	0.287598	0.234619	0	0	0.0845337	0.208374	0.256348	0.224487	0.329346	0.286865	0.387939	0.370605	0.482422	0.121765	0	0.985352	0.94043	0.970215	0.981934	0.0588379	0.799805	0.991699	0.756348	0.921875	1	1	0.956543	0.161255	0.777832	0.978516	0.915039	0.978516	0.20459	0.125	0.463379	0.780273	1	1	1	1	1	0.175781	0.344482	0.45752	0.872559	0.977051
ACH-000053					0
ACH-000054	0.451172	0	0	0.217407	0	0.206909	0.206909	0.220947	0.625	0.416748	0.625	0.804199	0.199951	0.474609	0.25	0.466553	0.466553	0	0	0	0	0.75	0	0	0	0.193604	0.694336	0.605469	0.0384521	0.773438	0.0384521	0.166626	0.460693	0.932617	0.549316	0.605957	0.605957	0.240723	0	0	0	0	0.541504		0.325684	0.139526	0.518555	0	0.507324
ACH-000055	0.0120468	0.0120468	0.205933	0.600098	0	0.174561	0.412598	0.456055	0.217407	0.720703	0.304443	0	0.326904	0.827148	0.173096	0.615234	0.0192261	0.0249939	0	0.166626	0.0185242	0.510742	0.300049	0.672852	0.762695	0.54248	0.958496	0.729004	0.703613	0.82959	0.577148	0.67627	0.885742	0.971191	0.971191	0.1698	0.151001	0.199951	0.799805	0.850098	0.899902	0.222168	0.649902	0.764648	0.862305	0.571289	0.328857	0.265381	1
ACH-000056	1	1	0.924805	0.950195	0.567383					1		0.220337	0.799805	0.933105	0.933105	0.933105	0.866699	0.818359	0.509277	0.641602	0.622559	0.935547	0.62207	1	1	1	1	1	1	1	0.82373	1	1	1	1	1	1	1	1						0.769043	0.461426	0.447754	0.973633	1
ACH-000058	0.787109	0.25	0.272705	0.395264	0.166626	0.227295	0.0454407	0.0454407	0.117676	0.375	0.210571	0.125	0.162109	0.694336	0.657715	0.947266	0.571289	0.227295	0.844727	0.275879	0.660156	0.918945	0.431396	0.859863	0.774414	0.426514	0.582031	0.966309	0.294189	0.547363	0.558594	0.640137	1	0.919922	0.899902	0.431396	0.775391	0.577148	0.307617	0.32251	0.612793	0.78125	0.3125	0.600098	0.186035	0.20459	0.228882	0.496338	0.883301
ACH-000059	0.981934	0.140381	0.962891	1	0.142822	0.922852	0.922852	0.75	0.947266	0.966797	0.947266	0.989258	0.899902	1	1	1	0.949219	1	0.916504	0.882324	0.970703	0.988281	0.640137	0.991211	1	0.803711	0.988281	0.988281	0.90918	0.988281	0.981934	0.974121	0.988281	0.941895	1	0.94043	0.865723	0.961426	0.922852	1	0.913086	1	0.739258	1	0.853027	0.941406	0.956543	0.979004	0.983398
ACH-000060	1	0.9375	0.700195	1	0.555664	0.473633	0.333252	0.166626	1	0.685547	1	0.145142	0.550781	0.836914	0.693848	0.510254	0.734863	0.588379	0.727051	0.439453	0.539551	1	0.967773	0.967773	0.966797	0.966797	1	0.969727	1	0.935547	0.456543	0.899902	1	0.846191	0.833496	0.666504	0.94873	1	0.952148	1	0.875	0.9375	0.5625	1	1	1	1	0.947266	1
ACH-000061	0.666504	0.547852	0.526367	0.763184	0.966309	0.54541	0.34082	0.25	0.666504	0.833496	0.904785	0.97168	1	0.972168	0.861328	0.971191	0.972168	0.706055	0.904297	0.602539	0.808105	1	1	0.796387	1	0.986328	0.98584	0.943848	1	0.887207	0.700195	1	0.941895	0.970215	0.985352	0.84375	1	1	0.739258	0.959961	1	0.962891	1	0.956543	1	1	0.862793	1	1
ACH-000062	0	0	0	0	0				0.769043		0.922852	0.399902	0	0.46582	0.258545	0.471924	0.0112381					0.672363	1	1	0.882324	0.548828	0.674805	0.390137	1	0.700195	0	1				0.769043	0.307617								1	1	0.208374	0.69043	1
ACH-000063	0.363525	0	0.266602	0.413818	0.214233	0.282715	0.304443	0.181763	0.214233	0.666504	1	0.466553	0.224487	0.395752	0.204102	0.469482	0.555664		0.369629	0.0434875	0.195679	0.799805	0.234009	0.766113	0.844238	0.734375	0.75	0.731934	0.729492	0.589844	0.358887	0.869629	1	0.916504	0.600098	0.353027	0.323486	0.950195	0.199951	1	1	0.629395	0.961426	0.360107			0.354736	0.603027	1
ACH-000065	0.653809	0.387207	0.208008	0.579102	0.171875	0.0952148	0.139526	0.162842	0.264648	0.643066	0.281982	0.468018	0.270752	0.6875	0.229126	0.5	0.294678	0.212769	0.476562	0.485352	0.788574	0.58252	0.663574	0.828613	0.977051	0.595215	0.821289	0.91748	0.965332	0.875	0.842285	0.785645	0.930176	0.959961	0.914062	0.558594	0.592285	0.919922	0.836914	0.471436	0.764648	0.714355	0.54541	0.814941	0.799805	0.657227	0.480713	0.539062	0.875977
ACH-000066	1	0.0666504	0.473633	0.579102	0.530273	0.789551	0.579102	1	0.428467	1	0.942871	0.363525	0.272705	0.981934	0.818359	0.600098	0.163696	0.105286	0.0571289	0.971191	0.971191	0.94873	0.847168	1	1	0.571289	0.939941	0.959961	0.904785	0.928711	0.714355	1	0.792969	1	0.966797	0.894531	0.842285	1	0.888672	0.922852	0.922852	0.922852	0.922852	1	0.941406	0.911621	0.98291	0.973145	0.976074
ACH-000067										0.300049		0																																			0.00515366
ACH-000068	0.544434	0.122192	0.651367	0.813965	0.616211	0.833496	0.427002	0.631348	0.729492	0.684082	0.517578	0.79248	0.337646	0.936035	0.423096	0.55127	0.410156	0.302979	0.461426	0.67041	0.791016	0.98877	0.986816	0.853516	1	0.899902	0.916504	1	1	1	0.939453	0.871582	0.992676	0.867676	0.985352	0.91748	0.990723	0.958496	0.958496	0.867676	0.988281	1	0.988281	1	0.202881	0.608887	0.711914	0.710449	0.937012
ACH-000069	1	1	0.54541	1		1	0	1		1			0.634277	1	0.780273	0.585449	1	0	0.695801	0.304443	1	1	1	1	1	0.813965	1	1		1		0.399902	1	1	1	1	1			1	1	0.588379	1				0.440918	0.734863	1
ACH-000070	0.9375	0.9375			1	0.833496	0.916504	1	0.788574	0.922852	1	1	0.90918	0.90918	0.90918	0.90918	0.90918		0.967773	0.967773	0.967773	1	1	1	1	1			1		0.958496					1	1	1	1						1	0.739258	1	1	1
ACH-000071	0.055542	0	0	0	0	0.0588379	0.0588379	0.235352	0.320068	0.25	0.199951	0.0322571	0.0869751	0.260986	0.0434875	0.130493	0.0869751	0	0.0217438	0.0434875	0	0.240967	0.081604	0.122437	0.0666504	0.122192	0.166626	0.145874	0.081604	0.0416565	0.0416565	0.0188751	0.47583	0.660156	0.349609	0.127319	0.145508	0.0769043	0.0769043	0.300049	0.509766	0.353027	0.219971	0.177734	0.0800171	0.0800171	0.0792236	0.0630493	0.331299
ACH-000072			0	0														0.577637					1	0	1	1			0.993652		0.993652	1								1	1	1	1						1
ACH-000073	1	0.951172	0.219482	0.30957	0.961426					1		0.980957	1	1	1	1	0.731934	0.922852	0.980957	0.353027	0.548828	0.0447693	0.666504	0.48877	1	0.353027	1	1	0.734375	0.510742	0.640625	1	0.759277	1	0.980957	0.268555	0.768555	1	0.25	1	1	1	1	0.95459	0.300049	0.0499878	0.681641	0.0300751	1
ACH-000074	0.518555	0.148193	0.236328	0.300049	0.0476074	0.111084	0.027771	0.0333252	0.75	0.875	0.916504	0.506836	0.222168	0.3125	0.222168	0.246948	0.17334	0	0.166626	0.166626	0.179443	0.586426	0.536621	0.829102	1	0.729004	0.722168	0.805664	0.769043	0.555664	0.5	0.694336	0.722168	0.907227	0.981445	0.486572	0	0.875	0.875					0.555664	0.1875	0.394043	0.350342	0.407471	0.983887
ACH-000075	0.110352	0	0.0506287	0	0	0	0	0	0.461426	0.315674	0.615234	0.12262	0.242432	0.54541	0.424316	0.580566	0.272705		0.256348	0.194824	0.350586	0.300049	0.0769043	0.230713	0.422363	0.401611	0.246948	0.325928	0.300049	0.269775	0.266602	0.153809	0.764648	0.811523	0.768066	0.101135	0.19104	0.222168	0.259277	0.5	0.464355	0.620605	0.586426	0.333252	0.175049	0	0.405029	0.353027	0.805664
ACH-000076	0.678711	0.0357056	0.19043	0.904785	0.0714111	0.399902	0	0.199951		0.399902		0	0	0.666504	0.116638	0.18335	0.203369	0.17395	0.294189	0.411865	0.441162	0.846191	1	1	0.968262	0.819336	0.979004	0.708496	0.869629	0.958496	0.478271	1	1	0.902344	0.951172	0.980957	0.980957	0.619141	1	1	1	0.911621	0.882324	0.888672	0.730957	1	0.613281	0.782715	1
ACH-000077			0	0		0.186035	0.232544	0.116272		0.45459		0	0.793457	0.725586	0.761719	1	0.761719	1	1	0.0294189	0.882324	0.714355	1	1	1	0.975098	0.659668	1	0.384521	0.787109	0.884766	0.952148	1	0.947266	0.818359	1	1			1	0.959961	1	1	0.888672	0.155151	0.155151	0.649414	0.10907	1
ACH-000078						0	0	0		0.375									0.04599	0.0348816	0.0348816	0.990723							0.562988		0.558594		1	1	0.991699	0	0								1	0		0.0114975
ACH-000080	0.350098	0.25	0.0714111	0.0666504	0.666504	0	0.117676	0	0.416748	0.459473	0.416748	0.445801	0.162109	0.405518	0.243286	0.729492	0.0270233	0.199951	0	0	0.888672	0.864258	0	0	0.438965	0.170776	0.846191	1	0.166626	0.384521	0.166626	0.90918	0.967773	0.967773	0.8125	0.199951	0	0	0.333252	1	0.961426	0.730957	0.577148	1	0.0294189	0.0294189	0.341553	0.123596	0.964844
ACH-000081	0.943848	0.718262	0.327637	0.624023	0.876953	0.75293	0.720215	0.933105	0.942383	0.95166	0.971191	0.71582	0.812012	0.961426	0.978516	0.953125	0.970215	0.752441	0.454834	0.58252	0.94873	0.584473	0.890625	0.969727	0.884766	0.744629	0.930664	0.988281	0.927246	0.971191	0.882812	0.975586	0.928223	0.98584	0.943848	0.761719	0.834473	0.844238	1	1	0.98291	0.98291	0.779785	0.913086	0.875	0.947266	0.696289	0.510742	0.94043
ACH-000082	0.300049	0	0	0	0.321533	0.125	0.166626	0.130493		0.428467		0.956543	0.583496	0.666504	0.625	0.583496	0.625	0.399902	0.333252	0	0.0370483	0.928711	0.9375	0.9375	1	0.526367	1	0.9375	0.935547	1	0.387207		0.922852	0.922852	0.922852	0.5	0.5	0.529297	0.235352	0.222168	0.666504	1	0.222168		1	0.300049	0.277832	0.53125	1
ACH-000083	0.205078	0.205078	0	0.0968018	0.13562	0.205933	0.314209	0.363525	0.856934	0.45459	0.678711	0	0.105286	0.210571	0.157837	0.166626	0.342041	0	0.0877075	0	0.157837	0.431152	0.145874	0.479248	0.666504	0.594238	0.86377	0.333252	0.333252	0.523926	0.254883	1	0.807129	0.982422	0.666504	0.328369	0.23877	1	0.666504	1	0.75	1	1	0.579102	0.399902	0.399902	0.363525	0.392334	0.933105
ACH-000085	0.0232544	0.0155029	0.027771	0.055542	0	0.178589	0.0357056	0.0714111	0.222168	0.108704	0.210571	0.125	0	0.142822	0	0.0259705	0.0389709	0	0.0645142	0.0325317	0.0731812	0.770508	0.341797	0.641602	0.76123	0.447754	0.739258	0.772949	0.851074	0.806641	0.452637	0.5	0.928711	0.912598	0.793457	0.456299	0.214722	0.399902	0.266602	0.069458	0.236084	0.222168	0.125	0.26416	0.192993	0.421143	0.303955	0.0491333	0.864746
ACH-000086	0.779297	0.360352	0.333252	0.549805	0.964355	0.125	0.125	0.0416565	0.125	0.59082	0.888672	0.233032	0.482422	0.905762	0.435303	0.611816	0.399902	0.320068	0.431396	0.735352	0.951172	0.682617	0.890137	0.945801	0.915527	0.870117	0.942871	0.975586	0.837402	1	0.906738	0.956543	0.962891	0.990723	0.990723	0.643066	0.957031	0.941406	0.82373	0.738281	1	0.595215	0.87793	1	1	0.619141	0.575195	0.635254	1
ACH-000087	0.181763	0.0178528	0.0124969	0.0365906	0.0370483	0.181763	0	0	0.166626	0.18457	0.166626	0.308838	0	0.181763	0.0454407	0.136353	0.0454407	0	0.0645142	0	0.0330505	0.911133	0.134033	0.367432	0.402832	0.319336	0.705078	0.686523	0.511719	0.597656	0.0930176	0.833496	0.785645	0.875	0.875	0.103088	0.265381	0.680176	0.67334	0.459473	0.811035	0.527832	0.378418	0.879883	0.125	0.303467	0.195435	0.524414	0.894043
ACH-000089	1	1				0.90918	0.90918	0.0908813	0.612793		0	0							0	0	0						0.961426	1	0.978027	1	0.522949	1	1	1	1	0	0					1	1	0.904785			0.0416565	0.899902
ACH-000090	0.615234	0.423096	0.706055	0.793945	0.45459	0.0625	0.4375	0.133301		0.605469		0.543945	0.894531	0.894531	0.777832	0.736816	0.736816		0.48877	0.333252	0.866699	0.305664	0.472168	0.540527	0.734863	0.52002	0.935547	0.90332	0.96875	0.967285	0.90625	0.615234	0.951172	0.975586	0.902344	0.326172	0.59082	0.615234	0.856934	0.285645	0.928711	0.928711	0.928711	0.444336	0.971191	0.861328	0.375977	0.660645	0.958496
ACH-000091	1	0.333252	0.333252	0.789551	0.161255	0.0384521	0.115356	0.230713	0.736816	0.916504	0.75	0	0.0238037	0.375	0.0238037	0.300049	0	0	0.736816	0.315674	0.631348	0.53125	0.464355	0.962891	0.75	0.469482	0.904785	0.899902	0.941406	0.842285	0.625	1	0.266602	0.827637	0.733398	0.157837	0.105286	0	0.0714111	0.666504	0.759766	0.434814	0.615234	0.600098	1	1	0.619141	0.320801	0.73584
ACH-000092	0.475098	0.170776	0.272705	0.327393	0.0350952	0.214233	0.321533	0.606934	0.310303	0.459961	0.310303	0.351318	0.203369	0.813477	0.423828	0.729004	0.694824	0.0526428	0.344727	0.344727	0.103455	0.558594	0.625	0.625	0.734375	0.240479	0.411865	0.972168	1	0.777832	0.826172	0.859863	0.846191	0.879883	0.961426	0.289551	0.342041	1	0.399902	0.142822	0.19043	0.19043	0.333252	0.411865	0.54541	0.302979	0.288574	0.574707	0.969727
ACH-000093	1	0.45459	0	1	0.827637	0.208374	0.333252	0	0.600098	0.8125	1	0.166626	0	0.277832	0	0.111084	0.0625		0.518555	0.481445	0.692383	0.958496	0.952148	0.952148	1	0.90625	0.930176	0.976562	0.947266	0.973145	0.789551	1	0.906738	1	1	0.888672	0.933105			0.56543	1	1	1	1			0.45874	0.785645	1
ACH-000094	1	1	0.947266	0.894531	0.540039	0.695801	0.521973	0.521973	0.111084	0.666504	0.333252	0.25	0.380859	0.619141	0.658691	0.643066	0.428467	0.555664	0.583496	0.285645	0.457031	0.561523	0.866699	0.933105	1	0.862793	0.899902	0.899902	0.736816	0.899902	0.631348	0.63623	1	0.759766	0.799805	0.558105	0.547852	0.75	0.5	0.692383	1	1	0.153809	1	0.740723	1	0.24585	0.716797	0.922852
ACH-000095	0.772949	0.86377	0.919922	0.959961	0.702637	0.790527	0.769043	0.922852	0.938965	0.75	0.897949	0.930176	0.600098	0.820312	0.600098	0.825195	0.75	0.15625	0.0810547	0.243286	0.378418	0.877441	0.933105	1	1	0.976074	0.875	0.964844	0.976074	0.865234	0.976562	1	0.97998	0.979492	0.919922	0.847656	0.779785	0.969727	0.90918	0.71875	1	1	0.419434	0.944336	0.952148	0.952148	0.574707	0.915039	0.952637
ACH-000096	0.606934	0.428467	0.727051	0.95459	0.399902	0.365967	0.731934	0.853516	1	0.904785	0.799805	0.614746	0.784668	0.876953	0.769043	0.6875	0.953613	0.666504	0.925781	0.692383	0.961426	0.829102	1	1	0.978027	0.891113	1	0.899902	0.875	0.97998	0.899902	1	1	1	0.969238	0.638184	0.956543	0.916504	0.972168	1	1	1	1		0.869629	1	0.561523	0.858887	0.98291
ACH-000097			0.444336	0.5	0.571289	0.75	0.25	0.75		0.916504		0.6875	0.370361	0.962891	0.222168	0.444336	0.153809	0.0908813	0.117676	0.353027	0.588379	0.9375	1	1	0.947266	0.631348	1	1	0.856934	1	0.893066		1	0.82373	1	0.625	0.875	1	1	0.5	0.5	0.625	0.625	1	0.833496	0.888672	0.633301	0.3479	0.942383
ACH-000098	0.131104	0.0655518	0	0	0	0	0	0	0.138916	0.25	0.305664	0.0389709	0	0.428467	0.314209	0.314209	0.371338	0	0.0465088	0.0232544	0.139526	0.276611	0.428467	0.261963	0.290283	0.290283	0.470703	0.228516	0.5	0.314209	0.338867	0.600098	0.792969	0.948242	0.881348	0.571289	0.464355	0	0	0.0499878	0.300049	0.25	0.600098	0.277832	0.365967	0.268311	0.452881	0.0634766	0.30957
ACH-000099	0.214233	0.172363	0.205933	0.323486	0.416748	0.583496	0.416748	0.333252	0.59082	0.285645	0.54541	0.380859	0.434814	0.521973	0.391357	0.391357	0.304443	0.300049	0.346191	0.423096	0.461426	0.594727	0.421143	0.684082	0.941406	0.706055	0.608887	0.744629	0.710449	0.630371	0.421143	0.799805	0.938965	0.9375	0.734863	0.413818	0.51709			0.585449	0.534668	0.511719	0.418701	0.5	0.285645	0.428467	0.40625	0.292725	0.927246
ACH-000100	0.914062	0.837891	0.247192	0.52832	0.683105	0.333252	0.399902	0.740723	0.856934	0.789062	0.692383	0.373291	0.164062	0.702148	0.103027	0.383057	0.134644	0.0714111	0.3396	0.242188	0.577637	0.600586	0.669922	0.929688	0.893555	0.665527	0.992188	0.95166	0.960449	0.95166	0.753906	0.895508	0.931641	1	0.931641	0.74707	0.810547	0.404785	0.365967	1	0.991699	0.941895	0.841797	1	0.85498	0.746094	0.40918	0.766113	1
ACH-000101												1										1											1	1	1												0.605957
ACH-000102	0.297852	0.255371	0.0638428	0.0638428	0	0	0	0.186035	0.0344849	0.131592	0.206909	0.431152	0.171753	0.556641	0.535156	0.367432	0.434326	0.122437	0.0985718	0.140869	0.338135	0.194824	0.320557	0.632812	0.745117	0.548828	0.814453	0.842773	0.5	0.799805	0.439941	0.324951	0.910156	0.934082	0.842285	0.015152	0.363525	0.588379	0.411865	0.777832	0.777832	0.533203	0.266602	0.706055	0.266602	0.399902	0.150024	0.185669	0.760254
ACH-000103	0.739258	0.594727	0.984863	0.818359	0.97168	0.971191	0.971191	0.799805	1	1	1	0	0.0666504	0.534668	0.314209	0.476074	0.163452	0.180054	0.896484	0.928711	1	1	0.91748	0.925781	1	1	1	1	0.799805	1	0.790527	0.978516	0.547852	0.547852	0.561035	0.90918	0.651367	1	1	0.979004	1	1	0.979004	0.987305	0.040802	1	1	0.888184	1
ACH-000104	0.955566	0.866699	0.906738	0.953613					1	1	1	1	0.894531	1	1	0.973633	0.947266	0.944336	0.919922	0.939941	0.939941	1	0.973633	0.986816	0.958008	1	1	1	0.958496	0.986816	0.9375	1	0.922363	0.98877	1	1	1	0.939453	1	1	1	1	1	0.90918	0.708496	1	0.922852	0.973633	0.945801
ACH-000105	1	0.977539	0.82373	0.882324	0.9375	0.9375	0.90625	0.9375		1		0.95459	0.935547	0.806641	0.774414	1	0.978516		0.95166	0.95166	0.967773	0.988281	0.945801	0.973145	1	0.942383	0.988281	0.976562	0.973633	0.988281	1	1	1	1	1	0.992188	0.86377	0.975586	0.975586	1	0.972168	0.972168	0.972168	0.922852	0.466553	0.966797	0.848145	0.98877	0.833496
ACH-000106	0.941406	0.941406	0.386475	0.386475	0.189209				0.944336	0.0588379	1	1	0.897949	0.979492	0.816406	0.938965	0.469482	0	0.236328	0.811523	0.811523	0.563965	0.879883	0.879883	1	1	1	1	1	1	1	1	1	1	1	0.125	0.09375	0.964355	1					0.941406	0.125	0.125	0.96875	0.793945	0.987305
ACH-000107	0.986816	0.589844	0.710938	0.327637	0.5	0.839844	0.600098	0.54541	0.947266	0.912109	0.947266	1	0.615234	0.94873	0.307617	0.474365	0.461426	0.217407	0.856934	0.933105	0.983398	0.932129	0.842285	0.968262	1	0.990234	0.950195	0.95166	1	0.990234	1	1	0.983887	0.983887	0.938477	0.935547	0.914062	0.875	1	1	1	1	1	1	0.942383	0.850586	0.479736	0.983398	0.965332
ACH-000108						0	0	0				0							0.00507736	0.00507736	0.00507736												1	1	1									1
ACH-000109	0.67334	0.142822	0.205933	0.323486	0.0416565	0.211548	0.211548	0.326904	0.444336	0.328857	0.055542	0.143799	0.297852	0.799805	0.397217	0.485596	0.304932	0.0689697	0.0891113	0.180054	0.160034	0.609375	0.515137	0.810547	0.895996	0.685059	0.824707	0.775879	0.782715	0.707031	0.51123	0.708984	0.983398	1	0.878906	0.590332	0.598145	0.317139	0.170776	0.851074	0.808594	0.595703	0.739258	0.390137	0.717773	0.658691	0.381348	0.194214	0.977539
ACH-000110	0.367432	0.204102	0.264648	0.264648	0	0.333252	0	0.318115	0.54541	0.550781	1	0.142822	0	0.265381	0.119995	0.119995	0.0612183	0	0.29541	0.0454407	0.25	0.789062	0.632812	0.919922	0.884277	0.771484	0.979492	0.799805	0.524414	0.879883	0.700195	0.714355	1	1	1	0.577637	0.611328	0.414551	0.5	0.692383	0.827148	0.711426	0.490234	0.375	0.461426	0.192261	0.33667	0.287842	1
ACH-000111	0.0188751	0.0188751	0	0	0.129028	0	0	0	0.300049	0.529297	0.263184	0.0307617	0.116272	0.465088	0.116272	0.232544	0.0465088	0	0.137939	0.5	0.5	0.631348	0.20459	0.386475	0.270264	0.162109	0.244385	0.229126	0.121948	0.127686	0.125	0.25	0.5	0.69043	0.399902	0.399902	0.333252	0.0588379	0.0625	0.0908813	0.0999756	0	0.0908813	0	0.296387	0.666504	0.215088	0.0563354	0.829102
ACH-000112	0.0294189	0	0.326416	0.040802	0.00507736	0.00881195	0	0.0133362	0.165405	0.306396	0.165405	0.161987	0.0421143	0.393555	0.0772095	0.143921	0.143921	0	0.538574	0.538574	0.307617	0.308105	0.178101	0.376709	0.187988	0.154175	0.19873	0.315674	0.0440369	0.122803	0.0443115	0.269531	0.207764	0.406982	0.281494	0.0327759	0.0245972			0.0165253	0.396729	0.0083313	0.0083313	0.0566101	0.21875	0.1875	0.189331	0.165894	0.652832
ACH-000113	0.807617	0.346191	0	0.166626	0					0.54541		0.959961	0.547852	1	0.571289	0.880859	0.678711	0.608887				0.614258	0.176514	0.235352	1	0.764648	0.952148	0.799805		1		1	1	1	0.714355	0.96875	1	1	1					1	1	0.842285	0.680176	0.979492	0.957031
ACH-000114	1	0	0.560059	0.560059	0.866699	0.941406	0.176514	1		0.813965		0.685547	0.729492	1	0.729492	0.89209	0	0.241333	0.19043	0.646484	0.814941	0.45459	0.706543	0.869629	1	0.896973	1	0.928711	1	0.928711	0.949219	1	1	1	0.925781	0.521973	0.913086	0.85498	0.867676	0.84375	0.53125	0.875	0.3125	0.922852	1	1	0.666504	0.685059	0.988281
ACH-000115	1	0.6875	0.933105	0.933105	0.899902	1	0.90918	0.818359	0.916504	0.90625	1	0.90625	0.950195	0.916504	0.933105	0.916504	0.833496	0	0.722168	0.905762	1	0.864258	0.89209	0.970703	0.882324	0.960938	0.879883	1	0.875	0.959961	0.894531	0.970703	0.984375	1	1	0.938477	1	0.869629	0.826172	1	0.176514	1	0.706055	0.926758	0.90918	0.848633	0.416748	0.79248	0.873535
ACH-000116	0.384521	0.230713			0.125	0	0	0.0769043				0	0	0.0333252	0	0	0.0322571	0	0	0	0	0.264648	0.363525	0.86377	0.638672	0.111084	0.577148	0.962891	0.80957	1	0.571289	0.727051				0	0			0.4375	0.3125	0.8125	0.0588379		0.214233	0.0714111	0.423096	0.136963
ACH-000117	0.426514	0.176514	0.193604	0	0.606934	0.25	0.055542	0.166626	0.0270233	0.237305	0.138916	0.25415	0	0.178589	0	0	0.0714111	0.157837	0.301514	0.0806274	0.59668	0.84375	0.425049	0.8125	0.90918	0.54541	0.966309	0.93457	0.856934	0.917969	0.885742	0.714355	0.862305	1	0.819824	0.761719	0.571289	0.604004	0.584961	0.6875	0.75	0.84375	0.71875	0.729004	0.652832	0.580078	0.754883	0.572266	0.922852
ACH-000118	0.9375	0.9375	0	0.210571		0.530762	0.734863	1	0.404297		0.287354	0.00740814	0	0	0	0	0	0	0	0.106384	0.085083		0.222168	0.215332	0.928711	0.928711	1	0.983398		1		0.984375				1	1							0.0294189	1	0	0.807617	0.569336	0.984863
ACH-000120	0.620605	0.620605			0.483643	0.984375	1	1	0.762695	0.655273	0.418701	0.577148	0	0.495361	0	0.385254	0.174316	0	0.311768	0.0844116	0	0.992188	1	1	0.995117	0.672852	1	0.89209	1	0.990234	0.719727	1	0.723633	0.834961	0.672363	0.39624	0.980957	0.922852	0.962891	1	1	1	1	1	1	0.799805	0.325195	0.704102	1
ACH-000121	0.933105	0.5625	1	1	0.285645	0.785645	0.214233	0.714355	0.619141	1	0.523926	0.383057	0.153809	0.769043	0.0769043	0.538574	0.153809	0	0.518555	0.703613	0.444336	0.836426	0.818359	0.960938	1	0.965332	0.828613	0.805664	1	0.833496	1	1	0.941406	0.901855	0.862793	0.973633	1			0.0800171	0.399902	0.399902	0.0416565	0.357178	1	0.846191	0.457031	0.898926	0.989258
ACH-000122	0.241089	0.116089	0.912598	0.952148	0.166626	0.59375	0.375	0.6875	0.53125	0.6875	0.65625	0.958496	0.399902	0.97168	0.67627	0.253418	0.371338	0.320068	0.640625	0.584473	0.629395	0.977539	0.958008	1	0.768066	0.963867	0.930664	0.984375	0.990723	0.977051	0.93457	0.950195	0.979004	1	0.894531	0.957031	1	0.984375	0.876953	0.92627	1	1	0.985352	1	0.106689	0.0533447	0.282715	0.980469	0.987793
ACH-000123	0.875	0.375	0.5	0.625	0.491455	0.235352	0.353027	0.411865	0.888672	0.777832	0.277832	0.113647	0.199951	0.933105	0.466553	0.533203	0.133301		0.340332	0.851074	0.95752	0.615234	0.836914	0.918457	0.772949	0.95459	0.884766	0.961426	0.533203	0.807617	0.799805	1	1	1	0.9375	0.826172	0.869629	0.928711	1	1	1	1	0.799805	0.666504	1	0.888672	0.655273	0.818359	1
ACH-000124	0.406738	0.0847168	0.969727	0.560547	0.516113	1	1	1	1	0.967773	0.947266	0.813965	0.384521	0.756348	0.5	0.961426	0.538574	0.4375	0.962891	0.981445	0.981445	1	1	0.978516	1	1	0.980957	1	0.833496	0.941406	0.666504	0.914062	1	1	0.969727	0.770996	1	0.5	0.899902	0.833496	1	1	1	1	0.566895	0.666504	0.90918	0.484375	1
ACH-000125	0.363525	0.272705	0.222168	0.666504	0.285645	0.178589	0.285645	0.606934	0.0908813	0.333252	0.151489	0.274414	0	0.538574	0.0769043	0	0	0	0.0769043	0.137207	0.0980225	0.65332	0.357178	0.660645	0.833496	0.633301	0.543457	0.708496	0.25	0.416748	0.0750122	0.560059	0.98291	0.915039	0.423828	0.108704	0.0217438	0.649902	0.350098	0.285645	0.51709	0.551758	0.758789	0.706055	0	0	0.3125	0.373535	0.821289
ACH-000126	0.672363	0.131104	0.25708	0.485596	0.90918	0.272705	0.272705	0.5	0.965332	0.606934	0.931152	0.825195	0.446777	0.744629	0.638184	0.446777	0.581543	0.538574	0.760742	0.630371	0.760742	0.833496	0.666504	0.972168	0.785645	0.678711	1	0.931152	1	1	0.806641	0.5	1	1	0.96875	0.939453	0.605957							1	0.714355	0.591797	0.280029	0.536133	1
ACH-000129	0.708496	0	0	0.0370483	0.463379	0.157837	0	0.153809	0.341553	0.230713	0.268311	0.309082	0.0968018	0.419434	0.580566	0.774414	0.871094	0.161255	0	0.0357056	0	0.632324	0.166626	0.45459	0.779785	0.644043	0.482666	0.700195	0.935547	0.700195	0.873047	0.388916	0.730957	0.807617	0.942383	0	0	0.785645	0	0.916504	0.916504	0	0	0.0476074	0.157837	0.421143	0.0615234	0.141235	0.774414
ACH-000130	1	0.888672	0.799805	1	1	0.928711	0.928711	0.928711	0.76123	1	1	0.883789	0.98877	0.98877	0.98877	0.98877	1	1	0.789551	0.920898	0.815918	0.930664			1	0.693359	0.989258	1	1	1	1	1	0.98877	1	0.977539	1	1	1	1	1	1	1	1	0.959961	1	0.785645	1	1	1
ACH-000131	0.701172	0.585449	0.187866	0.342041	0.32251	0.392578	0.303711	0.363525	0.347412	0.25	0.313477	0.483398	0.348145	0.755371	0.577637	0.629395	0.666504	0.0941162	0.486572	0.116455	0.130127	0.448242	0.186157	0.635254	0.506836	0.263916	0.610352	0.655273	0.754883	0.602051	0.376221	0.524902	0.382324	0.61377	0.926758	0.180908	0.114258	0.65332	0.52002	0.35083	0.666504	0.465576	0.362061	0.681152	0.445312	0.215942	0.165405	0.544922	0.78418
ACH-000132	0.969727	0.09375	0.470703	0.971191	0.942871				0.583496	0.515137	0.527832	0.366211	0.242432	0.575684	0.242432	0.394043	0.333252	0.0625	0.403809	0.653809	0.903809	0.922852	0.727051	0.955566	0.977051	0.98877	0.617188	0.867188	0.962891	0.714355	0.5	0.666504	0.919922	0.959961	0.821289	0.923828	0.94873	1	0.82373	1	1	0.583496	0.399902	0.45459	0.439941	0.839844	0.31665	0.713379	1
ACH-000133	0.407471	0.222168	0.0869751	0.083313	0.0750122	0	0.25	0		0								0.214233				0.227295	0.25	0.0740967	0.428467	0.0476074	0.0975342	0.214233	0.222168	0.0476074	0.105286	0.777832	0.353027	0.353027	0.353027			0.416748	0.199951	0.358887	0.384521	0.333252	0.128174	0.449951	0.75	0.125	0.0625	0.533203	0.866699
ACH-000135	0.760742	0.0761108	0.0121918	0.268311	0.399902	0.54541	0.363525	0.363525	0	0.540527	0.125	0.144897	0.284668	0.748047	0.146362	0.748047	0.0487671	0.142822	0.159668	0.0138855	0.00694275	0.434814	0.178589	0.508789	0.678711	0.625	0.661133	0.430664	0.646973	0.769043	0.162109	0.29834	0.700195	0.683105	0.283447	0.083313	0.118652	0.20459	0.65918	0.533203	0.600098	0.133301	1	0.666504	0.5	0.184204	0.340332	0.371582	0.987793
ACH-000136	0.771484	0.228516	0.133301	0.290283	0.52002	0.285645	0.714355	0.684082	0.740723	0.470703	0.893066	0.594238	0.686523	0.910645	0.656738	0.611816	0.621094	0.353027	0.770996	0.869629	0.826172	0.92041	0.839844	0.879883	1	0.824707	0.966309	0.898438	0.901855	0.898438	0.655762	1	0.986328	0.972168	0.930664	0.677734	0.711914	0.560059	0.680176	1	1	0.919922	0.916504	1	0.82373	0.856934	0.382324	0.455811	0.973633
ACH-000137	0.123047	0.0307617	0.088623	0.0822144	0	0.085083	0	0.191528	0.348877	0.145508	0.311035	0.199951	0.0634766	0.258057	0.142822	0.158691	0.174561	0.0263214	0.395752	0.106384	0.180908	0.345947	0.371338	0.563477	0.5	0.266602	0.5	0.692383	0.560059	0.577148	0.397217	0.489014	0.768066	0.839844	0.709473	0.256348	0.320557	0.522949	0.266602	0.230713	0.269775	0.322266	0.362549	0.255859	0.300049	0.25	0.547852	0.678223	0.629395
ACH-000138	0.253662	0.152222	0.899902	0.899902	0.0389709	0.355957	0.237305	0.626953	0.962891	0.78125	0.925781	0.18103	0	0.106445	0.030304	0.246216	0.0472412	0.0100021	0.19812	0.194214	0.203857	0.783203	0.691406	0.95752	1	0.942383	0.804199	0.958496	1	0.688965	1	0.596191	1	0.858398	0.949219	0.767578	0.878906			0.56543	1	0	0	1	1	0.754883	0.582031	0.55127	0.98291
ACH-000139	1	0.789551	0.606934	0.740723	0.47998	0.9375	0.1875	0.3125	0.742676	0.866699	0.914062	0.220337	0	0	0.130493	0	0.0217438	0	0	0.263184	0.421143	0.924316	0.978516	0.766113	1	0.896484	0.981934	0.731934	0.922852	1	0.922852	0.726074	0.989258	0.905273	0.905273	0.337402	0.457764	1	0.733398	0.888672	0.888672	0.962891	0.555664	0.447266	0.9375	0.875	0.713379	0.423584	0.986816
ACH-000140	0.404785	0.238037	0.0158691	0.0793457	0.321533	0.125	0.219482	0.463379	0.0192261	0.111084	0.055542	0.360596	0	0	0	0.0596924	0	0	0.13269	0.0618591	0.0824585	0.932617	0	0.770508	0.836914	0.717285	0.717773	0.837402	0.513672	0.639648	0.42334	0.432617	0.915039	0.952637	0.885742	0.216187	0.369385	0.600098	0.466553	0.0548096	0.23291	0.260254	0.219238	0.423096	0.128174	0.0256348	0.189575	0.0270233	0.122131
ACH-000141	1	0.419434	1	1	0.384521	0	0	0.055542		0.930176		0.0454407	0.0270233	0.114258	0.0810547	0.0810547	0.108093	0.461426	0.395264	0.906738	1	0.921387	0.875	1	0.921875	0.935059	1	1	0.875	1	1	0.977539	0.426514	0.985352	0.724609	1	0.984375	1	1	1	1	1	1	1	1	1	0.382568	0.993652	0.864258
ACH-000142	0.0755005	0	0	0		0	0	0.238037	0.142822	0.222168	0.333252	0.0126572	0.171387	0.575684	0.361084	0.314209	0.583496	0	0.0789185	0.105286	0.0789185	0.485596	0.297363	0.444336	0.342041	0.0657959	0.529297	0.568848	0	0.413818	0		0.951172	0.683105	0.924805	0.1875	0.166626	0.54541	0.199951	0.727051	0.363525	0.700195	0.727051	0.666504	0.350098	0.799805	0.0689697	0.342529	1
ACH-000144	0.947266	0.842285	0.698242	0.698242	1	0.777832	0	0.777832	1		1	0.4375	0.170776	0.463379	0.0249939	0.975098	0.300049	0.350098	0.0714111	1	0.153809	1			1	1	0.862305	0.928711		0.928711		0.928711	1	1	0.96875	0.92041	0.983887	0.90918	0.90918		1	1		1	1	1	0.774414	0.648438	1
ACH-000145	0.616211	0.110474	0.140869	0.270752	0.0545349	0.136353	0.136353	0	0.922852	0.493652	0.846191	0.248779	0.256348	0.791016	0.333252	0.524902	0.274902	0.264648	0.222168	0.104919	0.423096	0.51416	0.530273	0.713379	0.624023	0.759766	0.888672	0.835449	0.341553	0.644043	0.218506	0.609375	0.438232	0.848633	0.725098	0.411377	0.562012	1	0.537109	0.59082	0.727051	0.553711	0.123047	0.740234	0.123535	0.152954	0.199463	0.523438	0.949707
ACH-000146	0.970215	0.382324	0.0892944	0.35083	0.357178	0.416748	0.5	0.416748	0.8125	0.922852	1	0.706055	0.222168	0.873047	0.238037	1	0.412598	0.785645	0.708496	0.577637	0.408447	0.714355	0.849609	0.982422	0.966309	0.898926	0.944824	0.966797	1	0.933105	0.630371	0.984863	0.964844	0.973633	0.991211	0.931152	0.873535	0.90332	0.838867	1	0.972168	1	0.888672	1	0.689453	0.931152	0.920898	0.912598	0.963379
ACH-000147	0.411865	0.114258	0.181763	0.666504	0.0476074	0.206909	0.310303	0.379395	0.125	0.350098	0.0416565	0.508789	0	0.333252	0	0.0588379	0.117676	0.0344849	0.771484	0.542969	0.685547	0.773926	0.774414	0.790527	0.799805	0.566895	0.683105	0.853516	0.930176	0.780273	0.720703	0.700195	0.894531	1	0.982422	0.933105	0.733398			1	1	0.75	0.875	0.75	0.8125	0.34375	0.894531	0.359619	0.904785
ACH-000148	0	0	0.0200043	0.0200043	0	0.0249939	0.0249939	0.0810547	0.0908813	0.137939	0.0908813	0.0404053	0	0.157837	0.0877075	0	0.0701904	0.0256348	0.0243835	0.0249939	0.0249939	0.131836	0.0348816	0.0804443	0.21875	0.177124	0.0212708	0.147095	0.199951	0.186279	0.0166626	0.352051	0.459961	0.700195	0.367432	0.0888672	0.111084	0.0416565	0.0212708	0.40918	0.318115	0.227295	0	0.0847168	0.0968018	0.0645142	0.19043	0.106567	0.586914
ACH-000149	0.373047	0.217407	0.292236	0.205933	0.233276	0.199951	0.133301	0.230713	0.649902	0.299072	0.5	0.628418	0.32251	0.516113	0.516113	0.700195	0.366699	0.227295	0.385986	0.285645	0.236328	0.507812	0.507324	0.779297	0.696777	0.560547	0.770996	0.678223	0.59375	0.623535	0.5625	0.145874	0.712402	0.807129	0.662598	0.466553	0.458252	0.586914	0.600098	0.368408	0.25	0.571289	0.523926	0.736816	0.629395	0.600098	0.566406	0.376953	0.90625
ACH-000150	1	0.125			0.0681763	0.0491943	0.0163879	0.327881	0.411865	0.300049	0.411865	1						0.333252	0.5	0.0714111	0.964355	0.470703	0.950195	0.899902			1	1		1		1	1	1	1	1	0.333252			1	0	0	1	0.875	0.90918	1	0	0.389893	0.734863
ACH-000151	0.313232	0.0722656	0.708496	0.943848	0.600098	0.666504	0.185181	0.666504	0.850098	0.641113	0.600098	0.978516	0.706055	0.985352	0.543945	0.661621	0.261475	0.416748	0.932617	0.876465	0.786621	0.986328	0.976074	0.976074	0.95166	0.891602	1	1	0.951172	0.868652	0.951172	0.965332	1	0.951172	0.666504	0.662109	0.633789	1	1	1	0.936523	1	1	0.9375	0.140625	0.03125	0.494629	0.0689697	0.990723
ACH-000152	0	0.114441	0.194458	0.19043	0	0.159424	0.0575562	0.151123	0.445557	0.328125	0.455566	0.302979	0.139404	0.397461	0.175781	0.00606155	0	0	0.00775146	0.164062	0.6875	0.203369	0.282959	0.278076	0.228882	0.426758	0.304688	0.481201	0.707031	0.608887	0.830566	0.133911	0.988281	0.569824	0.610352	0.0825806	0	0.246338	0.25	0.186035	0.174438	0.172363	0.04599	0.0454407	0.0689697	0.0697632	0.112366	0.433838	0.405762
ACH-000153	0.843262	0.215698	0	0.319336	0	0.365967	0.365967	0.341553	0.488037	0.575684	0.759277	0.00980377	0.151855	0.384521	0.189819	0.0506287	0.0253143	0	0.243286	0.164429	0.383545	0.835449	0.711914	1	0.757812	0.515625	0.700195	0.95166	0.953613	0.983398	0.515625	0.794434	0.978516	0.978516	0.978516	0.230103	0.373047	0.291748	0.291748	0.792969	1	0.707031	0.741211		0.427246	0.378662	0.336426	0.509766	0.902832
ACH-000154			0.583496	0.583496	0.439941	0.300049	0.476074	0.600098	0.291748	0.875	0.291748	0.354736	0.125	0.25	0.125	0.25	0.125	0.333252				0.586426	0.25	1	0.399902	0.150024	0.75	1	0.700195	1	0.700195	0.944336	1	0.75	1	0	0.375										0.566895	0.666504
ACH-000155	0.918945	0.837891	0.777832	0.6875	0.363525	0.375	0.133301	0.384521	0.700195	0.876953	1	0	0.0714111	0.518555	0.137939	0.407471	0	0.111084	0.600098	0.789551	0.736816	0.944336	0.90918	1	0.972656	0.958984	0.948242	0.947266	0.962891	0.862305	1	0.772949	0.95752	0.872559	0.82959	0.918945	0.918945	0.631348	0.579102	0.1875	0.466553	0.5	0.353027	0.0999756	0.931152	0.931152	0.765625	0.930176	0.985352
ACH-000156			1	1	1					1		0.941406	1	1	1	1	1	1	1	1	1	0.924805	1	0.980957	1	1	0.875	1	1	1	1	1	1	0.974121	0.950195	0.714355	1	1	1	1	1	1	1	1			1	0.911133	1
ACH-000157	0.145142	0.0163879	0.0526428	0.0526428	0.0217438	0	0	0	0.181763	0.285645	0.0908813	0.0249939	0.205078	0.538574	0.631348	0.605469	0.552734	0.272705	0.115356	0.0784302	0.0980225	0.105286	0.163208	0.142822	0.426025	0.203735	0.310303	0.600098	0.61377	0.533203	0.0908813	0.448242	0.740234	0.899902	0.700195	0.280029	0.226685	0.444336	0.444336	0.739258	0.826172	0.695801	0.739258	0.700195	0.5	0.333252	0.183716	0.194214	0.752441
ACH-000158	1	1	1	1	0.209717	0.818359	0.0908813	0.899902		0.483887		0.839844	1	1	1	1	1	0.285645	0.45166	0.43335	0.43335	0.907227	0.671875	0.850586	0.620117	1	0.875	1	1	0.990234	1	0.895996	1	1	1	0.835449	0.988281	1	1	1	0.856934	0.643066	1	1	0.777832	0.0370483	0.705566	0.993652	1
ACH-000159	0.520996	0.416748	0.4375	0.46875	0.35083	0.458984	0.409912	0.295166	0.67627	0.421143	0.67627	0.348389	0.658691	0.731934	0.609863	0.731934	0.536621	0.380859	0.537109	0.537109	0.537109	0.558594	0.598145	0.588867	0.646973	0.447754	0.493408	0.620117	0.532227	0.531738	0.428467	0.762695	0.745117	0.901855	0.646973	0.484375	0.546875	0.363525	0.380859	0.519043	0.5	0.5	0.480713	0.542969	0.51709	0.51709	0.6875	0.51123	0.931152
ACH-000161	0.725098	0.536621	0.333252	0.423096	0.307617	0.1875	0.0625	0.5	0.916504	0.657715	0.833496	0.540039	0.363525	0.772949	0.272705	0.40918	0.363525	0.375	0.975586	0.951172	0.902344	0.510254	0.90918	0.696777	0.515625	0.604004	0.76416	0.933105	0.40625	0.693359	0.387207	0.333252	0.971191	0.971191	0.871582	0.692383	0.307617	0.75	0.75	0.856934	1	0.714355	0.856934	0.615234	0.763672	0.63623	0.699219	0.614258	0.963379
ACH-000162	0.0322571	0.28125	0.79541	1	0.933105	0.944336	0	0.055542	0.0370483	0.5	0.0370483	0.0856934	0.411865	0.793945	0.529297	0.735352	0.588379	0	0.434082	0.3396	0.3396	0.82373	0.558105	0.674316	1	1	0.675293	0.9375	0.977539	1	1	0.979004	0.71875	1	0.984375	0.333252	0.648926	0.947266	0.947266	0.833496	1	1	1	0.944336	0.46875	0.21875	0.45459	0.778809	1
ACH-000163	0.640137	0.160034	0.0499878	0.0499878	0.118408	0.325684	0.34082	0.214233	0.302979	0.272705	0.515137	0.292725	0.188721	0.320801	0.245239	0.39624	0.13208	0.0714111	0.181763	0.246094	0.276855	0.675781	0.20752	0.47168	0.758301	0.682617	0.302979	0.3479	0.360107	0.246338	0.280029	0.693848	0.881348	1	0.508301	0.289551	0.394775	0.199951	0.266602	0.0666504	0.933105	0.933105	0.933105	0.307617	0.275879	0.103455	0.385498	0.439941	0.796875
ACH-000164	0.652344	0.3479	0.415283	0.415283	0.913086	0.184204	0.157837	0.540527		0.535645		0.0714111	0.242432	0.878906	0.348389	0.54541	0.469727	0.119995	0.489258	0.595703	0.936035	0.943359	0.722168	0.961426	0.960938	0.974121	0.830566	0.783203	0.913574	1	0.913574	1	0.891113	0.891113	0.869629	0.558594	0.67627			1	1	0.90332	1	0.681641	1	1	0.470703	0.393066	0.856934
ACH-000165	0.199951	0.0666504	0.296387	0.629395	0.25	0	0	0.027771	0.482666	0.258057	0.533203	0.22583	0.181763	0.534668	0.363525	0.45459	0.386475	0.222168	0.466553	0.166626	0.466553	0.381836	0.373047	0.537109	0.586426	0.51709	0.595215	0.318115	0.513672	0.386475	0.555664	0.75	0.673828	0.717285	0.630371	0.261963	0.404785	0.652344	0.391357	0.884766	0.846191	0.730957	0.922852	0.611328	0.5	0.333252	0.375	0.516602	0.64209
ACH-000166	0.838867	0.838867	0.529297	0.646973	0.814941	0.75	0.799805	0.947266	0.557617	0.571289	0.5	0.432861	0.389893	1	0.423828	0.829102	0.0762939	0.083313	0.399902	0.387695	0.469482	0.577148	0.82373	0.617676	0.907715	0.579102	1	0.666504	1	1	0.941406	0.51709	0.882324	0.803711	0.980957	0.799805	0.333252	0.5		1	1	1	1	0.833496	0.896484	0.931152	0.752441	0.638672
ACH-000167																						0.998535			0	0														0.997559	1	1	0.995117
ACH-000168	1	0.764648	0.473633	0.947266	0.326416	0.0908813	0	1	0.125	0.769043	0.111084	0.915527	0.239136	0.869629	0.68457	1	0.108704	0.111084	0.660645	0.714355	0.981934	0.908691	0.645508	0.765625	0.912598	0.699219	0.912109	1	0.936035	0.878906	1	1	1	1	0.973145	0.673828	0.836914	1	0.600098	1	0.931152	0.982422	0.70166	0.686035	0.272705	0.878906	0.215332	0.648438	1
ACH-000169	0	0.25	0.0253143	1	0.273926	0.3479	0.217407	0.434814	1	0.63623	0.384521	0.980957	0.835938	0.541016	0.475342	0.180298	0.516602	1	0.227295	0	0.761719	1	1	1	1	1	1	1	0	1	0.384521	0.428467	1	1	1	1	1	1	1	1	1	1	1	0.199951			0.450928	1	1
ACH-000171	0.887695	0.19104	0.0508423	0.714355	0.0908813	0	0.392822	0.0357056		0.771973		0.660645	0.308594	0.766113	0.340332	0.436279	0.148926	0.0930176	0.323242	0.459229	0.82666	0.993164	0.9375	0.9375	1	0.840332	0.923828	0.916016	0.976074	0.981445	0.706055	0.971191	0.942383	1	0.862305	0.828613	0.957031	0.796387	0.962891	1	1	1	0.852051	0.980957	0.564453	0.516113	0.822266	0.968262	0.897461
ACH-000173	0.706055	0.294189	0.136353	0.217407	0.0908813				0.643066	0.45459	0.785645	0.209717	0.151489	0.71875	0.0606079	0.63623	0.272705	0.111084	0.09375	0.46875	0.625	0.5	0.666504	0.67627	0.94043	0.820801	0.775391	0.939941	0.971191	0.899902	0.885742	0.659668	1	1	0.928711	0.5	0.527832	1	0.882324	0.344727	0.833496	0.827637	0.799805	0.928711	0.344727	0.428467	0.513184	0.630371	0.845215
ACH-000174	0.970215	0.507324	0.379395	0.829102	0.733398	0.791504	0.799805	0.136353	0.272705	0.74707	0.363525	0.482178	0.493164	0.931641	0.930664	0.986328	0.726074	0.470703	0.782715	0.692383	0.914062	0.661133	0.684082	0.968262	0.947754	0.572754	0.87793	0.978027	0.850586	0.989258	0.656738	0.90918	0.960938	0.986816	0.920898	0.566406	0.451416	0.878418	0.797363	1	1	0.799805	0.799805	0.828613	0.853516	0.731934	0.439941	0.866211	0.944824
ACH-000176	0.894043	0.54541	0.253662	0.543945	0.0750122	0.0526428	0.0263214	0.222168	0.0416565	0.695801	0.0908813	0.720215	0.111084	0.650879	0.142822	0.0968018	0	0.476074	0.727051	0.795898	0.819336	0.453125	0.582031	0.964844	0.484863	0.737305	0.833496	0.888672	1	0.855469	0.555664	0.98584	0.978027	0.944336	0.967773	0.372559	0.703125	0.361084	0.285645	0.771973	0.913574	1	0.912109	0.197876	1	0.485596	0.321777	0.796387	1
ACH-000177	0.974121	0.902344	0.777832	0.777832	0	0.631348	0	0.222168	0.620605	0.846191	1	0.833496	0.973633	1	0.447266	1	0.789551	0.666504	1	0.166626	0.799805	0.803223	0.8125	0.708496	0.611328	0.351807	0.607422	0.902344	0.919434	0.816895	0.803223	1	0.625	1	0.719238	0.224121	0.413818	0.300049	0.300049	1	1	1	0.799805		0.916504	0.875	0.625	0.47998	0.94043
ACH-000178	0.0232544	0.0232544	0	0.292725	0.0416565	0.122803	0	0	0.185181	0.180908	0.222168	0.00653458	0	0.157837	0	0.157837	0	0	0	0	0	0.0181885	0.132812	0.377686	0.686523	0.457764	0.182617	0.410156	0.055542	0.206909	0.527832	0.399902	0.928711	0.975098	0.928711	0.209351	0.209351	0.513672	0.270264	0	0	0.387207	0.419434	0	0.471436	0.228516	0.0222168	0.0108109	0.969727
ACH-000179	0.854004	0.583496	0.847656	0.739258	0.17395	0.184204	0.0526428	0.184204	0.931152	0.904785	0.931152	0.389648	0.590332	0.852539	0.27417	0.887207	0.590332	0.0400085	0.905762	0.905762	0.773438	0.799805	0.736816	0.894531	0.944336	0.870605	0.928711	0.957031	0.961426	0.98584	0.942383	0.919434	1	1	0.973145	0.836426	0.944336	1	1					0.666504	0.125	0.6875	0.835938	0.839844	0.975098
ACH-000180	0.600098	0.342773	0.380859	0.571289	0.148926	0.235352	0.176514	0.235352	0.611328	0.625	0.388916	0.357178	0.166626	0.458252	0.0434875	0.458252	0.125	0	0.03125	0.0625	0.0625	0.696289	0.542969	0.638672	0.683105	0.438965	0.791504	0.439941	0.45459	0.52002	0.29541	0.625	0.84375	1	0.757812	0.1875	0.5625	0.476074	0.399902	0.666504	0.533203	0.866699	0.666504	0.916504	0.600098	0.649902	0.550781	0.481445	0.777832
ACH-000181	0.0200043	0	0.3125	0.3125	0.0540466	0.0178528	0.0181885	0.0181885	0.0232544	0.0666504	0.0465088	0	0	0	0	0	0	0	0.0652466	0	0	0.0219727	0.176514	0	0.119385	0.117676	0.279541	0.457031	0.166626	0.240356	0.0943604	0.35083	0.199951	0.643066	0.563477	0.0285645	0.0285645	0.235352	0.235352	0.0465088	0.255859	0.325684	0.119019	0.0750122	0.0526428	0.0526428	0.136841	0.290039	0.820801
ACH-000182	0.633301	0.300049	0.611328	0.944336	0.700195	0.280029	0.0800171	0	0.54541	0.133301	0.54541	0.0983887	0.0740967	0.148193	0.0370483	0.0370483	0	0	0.222168	0.411865	0.666504	0.541504	1	0.777832	0.919922	0.0800171	0.333252	0.680176	0.1875	0.199951	0	0.692383	1	1	1	0.399902	0.600098							1	0.888672	0.555664	0.300049	0.434326	1
ACH-000183	0.846191	0.846191	0.961426	1	0.928711	1	0.833496	0.777832	1	0.833496	1	0.901855	0.950684	0.975098	1	0.987793	0.703613	0.692383	1	1	0.980957	0.987305	0.941406	1	1	1	0.928711	1	0.950195	0.928711	0.850098	1	1	1	1	1	1	1	1	0.944336	0.944336	0.944336	0.944336	0.681641	1	1	0.961426	0.963867	1
ACH-000184	0.232544	0.116272	0.0625	0.0625	0	0.285645	0.178589	0.0370483	0.307617	0.263184	0.307617	0.113953	0.380859	0.80957	0.571289	0.761719	0.571289	0.25	0.178589	0.0714111	0.25	0.402344	0.279297	0.558594	0.76416	0.37085	0.459229	0.429932	0.297363	0.219971	0.175659	0.362549	0.654785	0.727051	0.490967	0.0681763	0.102295	0.405518	0.416748	0.270264	0.297363	0.459473	0.351318	0.615234	0.0357056	0.0357056	0.343506	0.19043	0.711914
ACH-000186	0.571289	0.171387	0.307617	0.692383	0					0.724121		0.216187	0.616699	0.916504	0.633301	0.883301	0.566895	0	0.3125	0.1875	0.4375	0.604492	0.631348	1	0.942871	0.714355	0.977539	0.93457	1	0.93457	1	0.619141	1	0.833496	0.833496	0.730957	0.903809	0.8125	0.875					0.799805	1	0.788086	0.557617	0.786133	0.898926
ACH-000187	0.433105	0.334717	0.602051	0.549316	0.407715	0.523438	0.201294	0.324219	0.601562	0.349609	0.423828	0.448242	0.325195	0.757324	0.376465	0.655762	0.408936	0.333252	0.272461	0.401855	0.48877	0.716309	0.416504	0.574707	0.629883	0.595215	0.652344	0.77832	0.630371	0.699219	0.667969	0.708984	0.853516	0.861328	0.779785	0.69043	0.691895	0.781738	0.631348	0.526367	0.602051	0.75	0.570801	0.534668	0.297607	0.731934	0.662109	0.595703	0.635254
ACH-000188	0.275879	0.0861816	0.123596	0.296631	0.0384521	0	0	0	0.382324	0.210571	0.117676	0.121643	0	0.0731812	0	0	0.0243835	0.353027	0	0	0.444336	0.587402	0.580566	0.90332	0.839844	0.669922	0.933105	0.871094	0.981934	0.580566	0.964355	0.875	0.971191	0.98584	0.98584	0.407959	0.697266	0.54541	0.54541	0.0344849	0.033905	0.438477	0.0861816	0	0.199951	0.146362	0.179443	0.387451	0.778809
ACH-000189	0.75	0.649902	0.896484	1	0.487793	0.5	0.5	0.25	0.975098	0.791504	0.975098	0.919922	0.512695	0.641113	0.769043	0.897461	0.666504	0.75	0.788574	0.807617	0.942383	0.985352	0.911133	0.955566	0.95459	0.95459	0.969238	0.938477	0.98291	0.89209	0.965332	0.971191	0.979492	0.938965	0.938965	0.63916	0.852539	0.956543	0.913086	0.978027	0.979004	0.958496	0.916504	0.978516	0.482666	0.413818	0.847656	0.957031	0.986328
ACH-000190	0.173096	0.0370483	0.027771	0.111084	0.0999756	0.0769043	0.0769043	0.153809	0.300049	0.53125	0.350098	0.027771	0.189209	0.729492	0.324219	0.833496	0.432373	0.230713	0.581543	0.29541	0.29541	0.673828	0.625	0.71875	0.980957	0.415039	0.90918	0.90918	1	0.90918	0.925781	0.979004	0.955566	0.977539	0.956543	0.382324	0.441162	0.814941	0.846191	0.678711	0.856934	0.643066	0.51709	0.449951	0.538574	0.346191	0.557617	0.348389	1
ACH-000191	0.587402	0.0999756	0.25708	0.328613	0.166626	0.34375	0.1875	0.03125	0.333252	0.266602	0.370361	0.181763	0.0856934	0.157104	0.0856934	0.12854	0.142822	0	0.128174	0.384521	0.376709	0.418701	0.260986	0.3479	0.534668	0.425293	0.524414	0.826172	0.652344	0.57959	0.0434875	0.720703	0.927246	0.84375	0.96875	0.333252	0.399902	0.0384521	0.0384521	0.5	0.521973	0.56543	0.608887	0.361084	0.661621	0.430664	0.286865	0.274414	1
ACH-000192													1	1	1	0	1						1	1					0.996094		1																		0.996094
ACH-000194	0	0.45459			0	0	0	0	0		0	0	0.0181885	0.0185242	0	0.0181885	0	0				0.635742	0	0			0.0666504	0.25	0.03125	0.1875	0.03125	0.434814	1	1	0	0.0227203	0.40918	0	0					1	0.0666504	0.0666504	0.030304	0.31665	0.935547
ACH-000195	0.243286	0	0.119995	0.0800171	0	0	0	0.307617		0.192261		0.40625	0.0952148	0.350098	0.0999756	0.150024	0.0499878		0.700195	0	0.0526428	0.763672	0.0333252	0.0625	0.753418	0.623047	0.22583	0.696777	0.125	0.63623	0.125	0.0400085	0.904785	0.738281	0.658691	0.113647	0.0454407			1	0.875	0.875					0.425049	0.384521	1
ACH-000196	0.709473	0.193604	0.391357	0.260986	0.315674	0.083313	0.125	0.0869751	0.23999	0.571289	0.399902	0.137207	0.142822	0.856934	0.0476074	0.856934	0.238037	0.45459	0.928711	0.571289	0.714355	0.701172	0.658691	0.902344	0.950195	0.721191	0.930176	0.906738	1	0.976562	0.72998	1	0.901855	0.967285	0.917969	0.833496	0.875	1	0.608887	0.971191	0.799805	0.971191	0.611328	0.913086	0.75	1	0.40332	0.860352	0.962891
ACH-000197	1	1	1	0.89209	1				1	0.916504	1	0.964355	1	1	0.977539	1	0.977539	0.955566	0.942383	0.903809	1	0.810547	1	1	1	1	0.976562	0.977051	1	0.977051	1	1	1	1	0.870605	1	1	0.950195	0.947266	1	0.666504	1	1	1	0.755371	0.866699	0.97998	0.899902	1
ACH-000198	0.941406	1	0.150024	0.199951	0.583496	0	0	0.466553				0.700195	0.818359	1	0.54541	0.86377	0.45459		0.875	0.9375	1	0.884766	1	1	1	1	0.952148	0.856934		1			1	1	1	0.850098	1							0.916504	0.90918	0.727051	1	0.904785	1
ACH-000200	0.856934	0.265381	0.39624	0.434082	0.8125	0.230713	0.230713	0.615234	0.511719	0.566895	0.162842	0.842773	0.0800171	0.754883	0.600098	0.459961	0.720215	0.523926	0.680176	0.453369	0.5	0.399902	0.754883	1	1	0.584473	0.958496	0.959961	0.788574	0.720215	0.827148	1	1	1	0.902344	0.291748	0.4375	0.366699	0.866699	1	1	1	0.466553	0.856934	0.875	0.875	0.645996	0.821289	0.89209
ACH-000201	0.771973	0.456055	0.578125	0.90625	0.888672				0.8125	0.861328	0.8125	0.615234	0.792969	0.896484	0.733398	0.933105	0.700195	0.571289	0.842285	0.684082	0.736816	0.897461	0.989746	0.939453	1	0.98584	0.964355	0.893066	0.928711	0.981934	0.964355	0.9375	0.879395	0.948242	0.964844	0.952148	0.939941	0.919922	0.916504	1	1	1	0.571289	0.956543	0.978027	0.893555	0.852539	0.952637	0.994629
ACH-000202	0.130493	0	0	0.300049	0.0392151	0	0	0	0.25	0.210571	0.5	0.0238037	0	0.354736	0	0.3125	0.103455	0.222168	0	0	0.102539	0.159058	0.181763	0.394043	0.5	0.236816	0.242432	0.628418	0.277832	0.371338	0.055542	0.5	0.677246	0.741699	0.193604	0.25	0.422119	0.166626	0.055542	0.333252	0.388916	0.166626	0.055542	0.5	0.375	0.25	0.343262	0.411865	0.979492
ACH-000203	0.841309	0.206299	0.714355	0.856934	0.416748	0.489258	0.319092	0.489258	0.592773	0.75	0.592773	0.0322571	0.00735474	0.335938	0.00735474	0.17041	0.0148163	0.0212708	0.546387	0.739258	0.730957	0.71582	0.78125	0.921387	0.746094	0.624023	0.9375	0.799805	0.952148	0.836426	0.654785	0.609863	0.932129	0.796387	0.967285	0.601562	0.374023	0.796387	0.559082	0.538574	0.307617	0.643066	0.384521	0.560059	0.615234	0.711426	0.63916	0.773438	0.981445
ACH-000204	1	1	0.974121	0.974121		0.973633	0.947266	0.657715		0.916504		0.862305	0.956543	0.978027	0.956543	0.956543	0.956543	0.839355	0.894531	0.868652	1	1	0.974121	0.974121	1	0.988281	0.973145	0.973633	0.984863	0.973633	0.984863	1	1	1	0.974609	0.811035	0.977539	1	0.911133	0.896484	1	1	1	1	0.875	1	0.992676	0.981934	0.898926
ACH-000205	0.949219	0.949219	0.833496	0.952148	0.922852	0.45459	0.54541	0.46875	0.978027	0.777832	0.717285	0.00429153	0.022995	0.00588226	0	0.0174408	0	0.0140839	0.0802612	0.0124969	0.150024	0.907227	0.994141	0.994141	0.935059	0.951172	0.951172	0.927734	0.898438	0.90918	0.811035	0.983398	1	1	0.993164	0.810059	0.717773	0.550781	0.510254	0.03125	0.246094	0.338379	0.399902	0.074646	0.985352	0.956055	0.789062	0.862305	0.943848
ACH-000207	0.612305	0.201294	0.22876	0.352295	0	0	0.0652466	0.0434875	0.399902	0.351074	0.428467	0	0.0784302	0.300049	0.126221	0.272705	0.0792236	0.055542	0.10144	0.188354	0.350342	0.314697	0.345947	0.632812	0.76123	0.288086	0.778809	0.725098	0.556152	0.830566	0.577637	0.623535	1	0.965332	0.924805	0.31665	0.224609	0.767578	0.626465	0.705078	0.799805	0.644043	0.733398	0.880859	0.340332	0.159546	0.143311	0.0964966	0.943848
ACH-000209	0.981445	0.891113	0.276855	0.35376	0.439941	0	0.45459	0	0.625	0.45459	0.125	0.0111084	0.422607	0.662109	0.352051	0.464844	0.450684	0.09375	0.733398	0.766602	0.766602	0.788086	0.853516	0.924805	0.771484	1	1	0.839355	0.933105	1	0.933105	1	1	1	0.967773	1	0.888672	0	0	0.9375	0.9375	1	0.125	0.866699	0.46875	0.4375	0.416016	0.708984	1
ACH-000210	0.600098	0	0.0714111	0.074646	0.5	0.055542	0.055542	0.20459	0.162109	0.235352	0.157837	0.040802	0.196411	0.856934	0.10907	0.872559	0.309082	0.19043	0.625	0.106384	0.170166	0.987305	0.620117	0.745117	1	0.837402	0.977539	0.977539	1	0.913086	0.597168	0.796875	0.666504	0.90918	0.640137	0.770508	0.838867	0.119995	0.399902	0.9375	0.939453	0.84375	0.516113	0.811035	0.630371	0.456543	0.0625	0.714355	0.964844
ACH-000211	0	0	0	0	0.055542	0.254883	0	0	0.0499878	0.0400085	0.0499878	0	0.285645	0.285645	0	0.285645	0	0				0.623535	0	0.127319	0	0	0.224976	0.209351	0	0	0	0.538574	0.0689697	0.448242	0.366699	0.0465088	0.348877	0.0869751	0.0869751	0	0	0	0		0	0	0	0	1
ACH-000212	0.897949	0.140015	0.25	0.212158	0.0526428	0.0957642	0.0631714	0.106384	0.232544	0.431152	0.279053	0.517578	0.175293	0.433105	0.422607	0.299072	0.288574	0.117676	0.343262	0.417969	0.626953	0.255371	0.403564	0.853027	0.820801	0.613281	0.778809	0.904297	0.850098	0.799805	0.549805	1	0.925293	1	1	0.23291	0.383545	0.964355	0.714355	1	0.888672	0.888672	0.875	0.785645	0.506348	0.207764	0.23291	0.173584	0.922852
ACH-000213												0.00284958										0.99707
ACH-000214	0.368408	0.399902	0	0.153809	0.0856934	0.216675	0.416748	0.25415	0.423096	0.272705	0.490234	0	0.0535583	0.267822	0.0350952	0.0350952	0.0476074	0	0.192261	0	0	0.540039	0.43335	0.300049	0.893555	0.531738	0.649414	0.5625	0.5	0.287598	0.0117645	0.333252	0.0283051	0.669434	0.910645	0.488037	0.644531	0.733398	0.0908813					0.178589	0.0476074	0.0476074	0.0983887	0.290771	0.845215
ACH-000217																						0.99707			1	1			0.00515366		0																0.997559
ACH-000218	1	0.188721	0.0476074	1	0.722168	0.758789	0.379395	1	0.684082	1	0.789551	0.575195	0.328369	0.984863	0.835938	1	0.955078	1	0.822266	0.63623	0.84082	0.906738	0.835938	0.970215	1	0.969238	0.779297	0.835938	1	0.853027	0.879883	1	0.905273	1	0.90918	0.207764	0.376709	1	0.897461	0.888672	0.888672	0.888672	0.799805	0.899902	1	0.45459	0.716309	0.910156	0.921875
ACH-000219	0	0.566895	0	0	0	0	0	0	0	0.518066	0	0.666504	0	0.363525	0	0	0	0	0	0.399902	0.600098	0	0.157837	0.491211	0.492432	0.253662	0.444336	0.444336	0	0.444336	0		0.0526428	0.0526428	0	0.375	0.375	0	0	0	0.0625	0	0.8125		0.473633	0.473633	0.479248	0.0181885	0.837402
ACH-000220	0	0	1	1						0.846191		1							0.0198059	0.0200043	0.0200043	1							1		0.00901031		1	0.990234	0.990234					1	1	0.970703	0.970703		0	1		1	1
ACH-000221	0.5625	0.387207	0.768066	0.719238	0.479248	0.380859	0.285645	0.649902	0.463379	0.511719	0.488281	0.265381	0.22644	0.839844	0.415039	0.75	0.302002	0.579102	0.586426	0.678711	0.655273	0.70166	0.689453	0.915039	0.965332	0.810547	0.86377	0.90918	0.626953	0.904785	0.630859	0.634766	1	0.856934	1	0.833496	0.803223			0.896484	0.925781	0.896484	0.792969	0.799805	0.875	0.866699	0.604492	0.595215	0.990234
ACH-000222	1	0.959961	0.842285	1	0.508301	0.666504	0.476074	0.904785	0.941406	0.922852	0.67627	0	0	0.121216	0	0	0	0	0.0819702	0.0819702	0.0819702	0.948242	0.911133	0.978027	0.843262	1	0.902344	0.86377	1	1	1	1	1	1	0.953613	0.864746	0.756836	1	1	0.629395	1	1	0.370361	0.950195	1	1	0.453369	0.990723	1
ACH-000223	0.843262	0.459961	0.516602	0.688477	0.460693	0.421875	0.125	0.349121	0.850098	0.922852	0.725098	0.423828	0.444336	0.90918	0.727051	0.745605	0.490967	0.300049	0.560059	0.720215	0.560059	0.807129	0.968262	0.989258	0.991211	0.884766	0.939941	0.939453	0.888672	0.848633	0.98291	0.948242	0.971191	0.957031	0.971191	0.886719	0.937988	0.885742	0.856934	0.59082	0.925293	0.970215	0.895508	0.916504	0.883789	0.88623	0.80127	0.876953	0.98877
ACH-000225	0.95459	0.772949	0.893066	0.799805	0.894531	0.555664	0.5	0.5		0.950195		0.627441	0.799805	1	0.759766	0.938965	0.839844	0.888672	0.90918	0.90625	0.90625	0.959961	1	1	0.922852	0.922852	0.90332	1	0.904785	0.96875	0.952148	1	1	0.966797	0.935547	0.947266	0.899902	1	0.695801	1	1	0.9375	0.8125	1	1	0.933105	0.833496	0.769043	0.727051
ACH-000226	0.139526	0	0.0350952	0.362061	0	0	0	0.055542	0.0384521	0.227295	0	0.506836	0.236328	0.854492	0.836426	0.891113	0.814941	0.45459	0.262451	0.3125	0.3125	0.149292	0.157837	0.677246	0.375	0.175049	0.873535	0.868164	0.971191	1	0.428467	0.384521	1	1	0.981934	0	0.137939	0.0512695	0.0263214	0.449951	0.449951	0.449951	0.449951	0	0.333252	0.333252	0.0212708	0.509277	1
ACH-000227	1	0.95752	0.64502	0.64502					1		1		1	0.45459	0.40918	0.54541	0	0				1	0	0	1	1	1	1	1	1	0.875	1	1	0.9375	0.882324	1	0	0.976562	0.976562					1	0.300049	1	0.307617	0.862793	1
ACH-000228	0.288086	0.033905	0.196777	0.145142	0.370361	0.0181885	0.0181885	0	0.722168	0.59082	0.5	0.0684814	0.0472412	0.20166	0.125977	0.149658	0.157471	0	0.0337219	0.0224762	0.0337219	0.717285	0.389648	0.220825	0.69873	0.457764	0.776367	0.776367	0.696289	0.747559	0.727051	0.833496	0.688477	0.986816	0.974121	0.625	0.324951	0.692383	0.538574	0	0.5	0.172363	0.161255	0.423096	0.0238037	0.333252	0.157227	0.57959	0.888672
ACH-000231	0.444336	0			0	0	0	0	0.702637	0.625	0.729492	0	0	0	0	0.214233	0	0.600098	0.59082	0.0454407	0.63623	0.318848	0.45459	0.626953	1	0.581543	0.0769043	0.782715	0.414307	0.623047	0.118164	1	1	1	0.936035	0.0487671	0.121948								0.541016	0.666504	0.820801	0.380615	0.727051
ACH-000232	0.275879	0.0344849	0	0	0	0	0	0	0.0370483	0.1875	0	0.25708	0.28125	0.78125	0.53125	0.71875	0.3125	0	0.0750122	0.0499878	0.0999756	0.320557	0.0655518	0.409912	0.305176	0.186401	0.426025	0.418213	0.304443	0.399902	0.260986	0.130493	0.82959	0.95752	0.895996	0.203369	0.25415	0.157837	0.263184	0.4375	0.484863	0.484863	0.45459	0.5	0.3479	0.17395	0.268555	0.303955	0.669922
ACH-000233	0.243286	0.229736	0.329102	0.509277	0.446045	0.708008	0.444336	0.931152	0.586426	0.731934	0.827148	0.292725	0.0611572	0.884766	0.44043	0.884766	0.0179901	0.22583	0.422852	0	0.469238	0.850098	0.301758	0.882324	0.696777	0.597168	0.961426	0.961426	0.927246	0.969727	0.766602	0.967285	0.698242	0.994141	0.94873	0.728027	0.638672	0.571289	0.774902	0.974121	0.966309	0.546387	0.644043	0.833496	0.760254	0.71875	0.628906	0.408936	0.990234
ACH-000234	0.625977	0.284668	0	0.399902	0.173706	0.121399	0.0714111	0.0785522	0.771484	0.470703	0.799805	0.00460815	0.0270233	0.0137024	0.0135117	0.0137024	0.121643	0.133301	0.279541	0.22583	0.279541	0.421387	0.484375	0.700195	0.863281	0.509277	0.425049	0.811035	0.897949	0.811035	0.603027	0.679199	1	0.992676	0.894531	0.685547	0.600098	0.922852	1	0.39624	0.5	0.377441	0.584961	0.142822	0.692871	0.65332	0.404541	0.634766	0.655762
ACH-000235	0.622559	0.11322	0.399902	0.541504	0.363525	0.434814	0.0908813	0.40918	0.928711	0.869629	1	0.081604	0.0425415	0.239136	0.0425415	0.127686	0.108704	0.153809	0.0425415	0	0.0425415	0.702637	0.170166	0.916504	0.883301	0.600098	0.422607	0.527832	0.297363	0.388916	0.342041	1	0.794434	1	0.849121	0.724121	0.862305	0.714355	0.357178	0.973633	0.973633	0.684082	0.473633	0.777832	0.720703	0.666504	0.488037	0.104187	0.908203
ACH-000236	1	0.89209	0.898438	0.971191	1	0.95459	0.772949	0.90918	0.925781	0.875	0.814941	0.030304	0.0280304	0.254639	0.0467224	0.0280304	0	0	0.0256348	0.258545	0.232788	0.930176	0.963379	0.975586	0.952148	0.971191	0.896973	0.958984	0.976074	1	0.869141	0.902344	0.953125	0.905273	0.946777	0.85791	0.932129	1	1	0.600098	0.933105	1	1	0.724121	0.884766	0.884766	0.577637	0.691406	0.911133
ACH-000237	0.0800171	0.0133362	0.0625	0	0.085083	0.379883	0.0200043	0.140015	0.5	0.169189	0.227295	0.246948	0.146118	0.325684	0.157349	0.202271	0.0561829	0.159058	0.281006	0.337158	0.37085	0.301025	0.37207	0.449707	0.539062	0.434814	0.596191	0.592773	0.354736	0.540039	0.349121	0.70752	0.841309	0.914551	0.573242	0.386475	0.522949	0.365967	0.317139	0.436279	0.436279	0.472656	0.428467	0.413818	0.0416565	0.125	0.53125	0.241821	0.746582
ACH-000238	0.402588	0.0389709	0.0689697	0.51709	0.0108719	0.0238037	0.0238037	0.119019	0.268311	0.600098	0.536621	0.0709839	0.0133362	0.0533447	0.0400085	0.0800171	0.0270233	0.03125	0.121216	0.0202026	0.202026	0.132446	0.0753174	0.794434	0.751465	0.395996	0.852539	0.907715	0.609863	0.723145	0.385742	0.379639	0.678711	0.792969	0.814453	0.180542	0.218262	0.425049	0.350098	0.338867	0.380127	0.297607	0.437988	0.414307	0.0757446	0.015152	0.0784302	0.230225	0.861328
ACH-000239	0.888672	0.333252	0	0.176514	0	0	0.03125	0.0322571	0.666504	0.416748	0.733398	0.275879	0.0526428	0.105286	0	0	0	0	0.0588379	0	0.294189	0.702148	0.655273	0.98291	0.84375	0.4375	0.846191	0.920898	0.782715	0.974121	0.5	0.399902	0.97998	1	0.97998	0.465088	0.395264	0.428467	0.357178	0.9375	0.875	0.6875	0.82373	0.657715	0.965332	0.965332	0.584473	0.592773	1
ACH-000241	0.75	0.111084	0.805664	0.777832	0.970703	0.0999756	0.0999756	0.222168		0.512695		0.855469	0.0243835	0.292725	0.0243835	0.0731812	0.0365906	0.0294189	0.0697632	0.139526	0.279053	0.976562	0.935547	0.419434	0.797363	0.513672	0.973145	0.552734	0.952148	0.631348	0.744629	1	0.46875	0.96875	0.939453	0.806641	0.967773	1	1				0	0.470703	0.0588379	0.205933	0.56543	0.37793	0.973145
ACH-000242	0.649902	0.561035	0.491211	0.553711	0.888672	0.533203	0.0666504	0.533203	0.75	0.955566	0.846191	0.318115	0.439453	0.711914	0.333252	0.45459	0.121216	0.555664	0.479248	0.468018	0.553223	0.638184	0.84375	0.9375	0.959473	0.630371	0.938965	0.856934	1	0.951172	0.538574	0.927246	0.943359	0.96582	0.797852	0.795898	0.806152	0.575684	0.54541	0.46875	0.483887	0.46875	0.387207	0.9375	0.473633	0.421143	0.342773	0.623535	0.953613
ACH-000243	0.310791	0.278809	0.385986	0.394775	0.442383	0.0377502	0.0377502	0.151001		0.373291		0.0704346	0.0823975	0.395508	0.103271	0.195679	0.0163116	0.0112381	0.0259705	0.584473	0.610352	0.643066	0.861328	0.979004	1	0.845703	0.894043	0.948242	0.751953	0.600098	0.837402	0.649902	0.725098	0.931152	0.839844	0.687988	0.473145			0.270264	0.583496	0.297363	0	0.21814	0.419922	0.759766	0.219604	0.347412	0.95752
ACH-000244	0.333252	0.111084	0.0769043	0.153809	0.25	0.111084	0.0666504	0.139526	0.260986	0.423096	0.0434875	0.651367	0.227295	0.866699	0.844238	0.866699	0.777832	0.0416565	0.625	0.270752	0.3125	0.653809	0.743164	0.919922	0.928711	0.700195	0.675781	0.947266	0.729492	0.592285	0.364746	0.812012	1	0.950684	0.868652	0.320068	0.386719	0.379395	0.344727	0.327881	0.533203	0.623047	0.327881	0.416748	0.333252	0.407471	0.0161285	0.320557	0.631348
ACH-000245	1	1	0.950684	0.982422	0.789551	0.865234	0.788574	0.75	0.783691	0.928711	0.972168	0.958984	0.964844	0.988281	0.988281	0.964844	0.905762	0.666504	0.802246	0.493652	0.807617	0.978516	0.87207	0.820312	0.879395	0.963867	0.990234	1	1	0.989746	1	0.980957	1	1	0.943359	0.819824	0.98291	1	0.962891	0.989746	0.919434	0.989746	0.919434	1	0.591309	0.666504	0.935547	0.796387	1
ACH-000247	0.811523	0.426514	0.466553	0.566895	0.523926	0.15625	0	0.15625	0.714355	0.582031	0.606934	0.0314026	0.103455	0.241333	0.107117	0.310303	0.172363	0.117676	0.0298462	0.0476074	0.169189	0.589844	0.881348	0.974121	0.928711	0.678711	0.842285	0.919434	0.602539	0.777832	0.724609	0.922852	0.882324	0.979004	0.916504	0.729004	0.881348	0.975098	1	0.952148	0.666504	0.5	0.640137	0.107117	0.828613	0.628418	0.306641	0.412598	0.985352
ACH-000248	0	0	0	0	0.0666504	0.105286	0	0.105286	0.157837	0.195068	0	0	0	0.148193	0	0	0	0.083313	0.0263214	0.0263214	0.0270233	0.351318	0.235352	0.151489	0.20752	0.0943604	0.51709	0.615234	0.529297	0.455566	0.3125	0.055542	0.360107	0.720215	0.52002	0.605469	0.368408	0.353027	0.176514	0.0588379	0.294189	0.0588379	0.0588379	0.222168	0.0370483	0.0740967	0.16394	0.126465	0.552246
ACH-000249	0.833496	0.785645	0.703613	0.700195	0.681641	0.526367	0.555664	0.5625	0.75	0.809082	0.856934	0.0896606	0.115356	0.5	0.148193	0.384521	0.259277	0.272705	0.166626	0.255371	0.270752	0.766113	0.696289	0.775879	0.982422	0.912109	0.870605	0.945312	0.764648	0.946289	0.970703	1	1	0.875	0.941406	0.851562	0.618652	1	0.600098		0.875	0.125	0.75		1	0.90918	0.755859	0.594238	0.981934
ACH-000250	0	0	0.0540466	0.131592	0.108093	0.295166	0.306396	0.333252	0	0.5	0.166626	0.3479	0.0263214	0.756836	0.368408	0.736816	0.526367	0.333252	0.37207	0.232544	0.209351	0.415039	0.215698	0.442383	0.707031	0.575684	0.25	0.951172	0.689453	1	0.477783	0.608887	0.966797	1	0.875	0.75	0.75	0.850098	0.899902	0.541504	0.875	0.875	0.875		0.136353	0.159058	0.0471802	0.442383	1
ACH-000252			0	0		0	0	0				0											0	0			0.538574	1		1															0.83252	0.83252			1
ACH-000253			0	0.25	0.391357	0.0652466	0.130493	0.108704	1	0.807617	0.833496	0.112366	0	0.159424	0	0.0434875	0	0	0	0.214233	0.5	0.745605	0.115356	0.942383	0.967285	0.728027	1	0.985352		0.735352		1	0.9375	1	1	0.526367	0.789551			1	1	1	1		0.54541	0.63623	0.199951	0.389893	0.966797
ACH-000254	0.850098	0.579102	0.727051	0.5	0.729492	0.703613	0.333252	0.230713	0.727051	0.766602	0.969727	0.415527	0.202759	0.394287	0.364746	0.378418	0.394775	0.646973	0.5	0.475098	0.524902	0.686523	0.805664	0.986328	1	0.542969	0.710449	0.94873	1	0.924805	0.973145	0.761719	0.918457	0.877441	0.785645	0.781738	0.754395	0.46875	0.387207	0.794922	0.815918	0.820312	0.820312	0.571289	0.629395	0.777832	0.594238	0.657227	0.898926
ACH-000255	0	0			0	0	0	0	0.558594	0.0789185	0.220825	0.0256348	0.378906	0.538086	0.417969	0.537109	0.529785		0.0212708	0.0217438	0.0217438	0.211426	0	0.0147095	0.368408	0.191284	0.235352	0.216187	0.0178528	0.216187	0.036377	0	0	0.62207	0.644531	0	0.171875			0	0	0	0	0.265625	0.0540466	0.0270233	0.0952148	0.242432	0.0370483
ACH-000256	0.109741	0.0243835	0	0	0.0444336	0	0	0.0625	0.214233	0.333252	0.339355	0.0319214	0	0	0	0	0	0	0.0476074	0.166626	0.0476074	0.474365	0.111084	0.481445	0.791504	0.513672	0.764648	0.711426	0.958496	0.803711	0.318115	0.527832	1	0.916504	0.944336	0.211548	0.384521	0.272705	0.272705	0.307617	0.235352	0.235352	0.235352	0.625	0	0.0750122	0.280029	0.25	0.986816
ACH-000257	1	0.638672	0.580566	0.806641	0.739258	0.94873	0.102539	0.281982	0.625	0.846191	0.625	0.659668	0.5	0.965332	0.362061	0.758789	0.603516	0.666504	0.629883	0.629883	0.910156	0.844238	0.56543	1	0.868652	0.871094	0.841309	0.865723	1	0.841309	0.833496	0.357178	1	1	1	0.81543	0.836914	0.771973	0.929688	1	1	1	1		0.558105	0.976562	0.838379	0.866699	0.921387
ACH-000258	0.181763	0.416748	0.90918	1	0.799805	1	0.727051	0.45459		1		0.224121	0.0357056	0.464355	0.0357056	0.25	0.214233		0.941406	1	0.941406	0.833496	1	1	0.888672	0.964355	1	0.730957		1			1	0.947266	1	1	0.9375	1	0.777832					1	0.529297	0.941406	0.777832	0.785645	1
ACH-000259												1													0	0																		0
ACH-000260	0.0991821	0.0725708	0.0769043	0.0649414	0.243896	0.285645	0.285645	0	0.0908813	0.361328	0	0.184692	0.126953	0.392822	0.0968018	0.301514	0.0476074	0.055542	0.222168	0.164551	0.0649414	0.121643	0.268555	0.233643	0.251953	0.195679	0.542969	0.473633	0.448242	0.462402	0.25	0.0847168	0.617676	0.480225	0.380859	0.0521851	0.0917358	0.241943	0.174561	0	0.0526428	0.0499878	0	0.17395	0.236816	0.24353	0.26001	0.281738	0.300049
ACH-000261	0.696289	0.140381	0.350098	0.460205	0.151001	0.050293	0.0335083	0.119324	0.50293	0.791504	0.668945	0.349854	0.276367	0.914551	0.592773	0.743652	0.620117	0.184204	0.462402	0.384521	0.61377	0.631836	0.779785	0.979004	0.935547	0.454834	0.941895	0.937012	0.932129	0.900391	0.754395	0.98584	0.984375	0.963867	0.929199	0.381592	0.411377	0.93457	0.733398	0.710938	0.785645	0.618652	0.746582	0.655762	0.655273	0.327637	0.304932	0.668457	0.993164
ACH-000263	1	1																				0.958496														1	1
ACH-000264	0.75	0.1875	0.125	0.399902	0.0908813	0.135132	0.0540466	0.243286	0.4375	0.538574	0.625	0.0185242	0	0.280029	0	0.0800171	0.0800171	0	0.413086	0.3479	0.5	0.89209	0.63916	0.655762	0.82959	0.479248	0.847656	0.869629	0.700195	0.586914	0.5	0.799805	0.681641	0.931641	0.54541	0.394775	0.552734	0.333252	0.25	0.25	0.5	0.5	0.611328	0.375	0.432373	0.811035	0.246948	0.109619	1
ACH-000265																		1																													0
ACH-000266	0.577148	0.577148	0.875	1	0.594238	0.803711	0.745117	0.122437	0.296387	0.538574	1	0	0.547363	0.211548	0	0	0.11322	0.0333252	0.6875	0.40625	0.96875	0.571289	0.651367	1	0.32251	0.54834	0.968262	1	0.833496	1	0.984863		1	1	0.981934	0.941406	1	1	1	0.933105	1	0.0666504	0.875	0.571289	1	1	0.976074	0.970703	1
ACH-000267	0.819336	0.308594	0.152954	0.360352	0.75	0.166626	0.222168	0.411865	0.0999756	0.557617	0.700195	0.46875	0.649902	0.950195	0.807129	0.884766	0.578613	0.107117	0.287598	0.0993652	0.662109	0.626953	0.551758	0.888672	0.898438	0.557129	0.759766	0.98877	0.885742	0.920898	0.605469	0.789062	0.90918	0.984863	0.974609	0.209229	0.222656	0.877441	0.770996	0.943848	0.746582	0.67627	0.49292	0.982422	0.753418	0.493164	0.093689	0.32251	0.980957
ACH-000268	0.6875	0.3125	0.360107	0.560059	0.0666504	0.680176	0.439941	0.291748	0.47998	0.693848	0.555664	0.5	0.173096	0.557617	0.365479	0.346191	0.282959	0.166626	0.568848	0.421143	0.586426	0.577637	0.646973	0.826172	0.917969	0.442627	0.744629	0.839844	0.899902	0.819824	0.818359	0.839844	0.979492	0.9375	0.836914	0.539551	0.72998	0.571289	0.5	0.846191	0.846191	0.846191	0.807617	0.764648	0.856934	0.449951	0.40918	0.549805	1
ACH-000269	0	0	0.0487671	0.0499878	0	0.199951	0	0.199951	0.0999756	0.235352	0.300049	0.235352	0.457031	0.799805	0.542969	0.457031	0.714355	0.166626	0.203125	0.203125	0.203125	0.1875	0.183105	0.287598	0.111084	0.126953	0.293213	0.305176	0.146362	0.152588	0.153809	0.566895	0.600098	0.856934	0.51416	0.121216	0.151489			0	0	0	0		0.25	0.24585	0.330078	0.107117	0.680176
ACH-000270	0.888672	0.263916	0.235352	0.611816	0.258789	0.274902	0	0.449951	0.826172	0.759766	0.956543	0	0	0.158936	0	0.0183411	0.0275269	0	0.190918	0.145508	0.0818481	0.702148	0.511719	0.86377	0.612305	0.560059	0.975098	0.924805	0.959473	0.915527	0.648438	0.69043	0.922852	1	0.980957	0.380859	0.5	0.958496	0.583496	0.130493	0	0.0869751	0.304443	0.452393	0.333252	0.354248	0.572266	0.335449	0.945312
ACH-000271	0.5	0.30835	0.875	1	0.75					0.847656		0.44043	0.888672	0.888672	0.555664	0.925781	0.222168	0.0869751	0.873535	0.988281	0.77002	1	0.888672	0.958496	1	1	0.975098	0.975098	1	1	1	0.90918	0.947266	1	1	0.555664	1	1	1	1	1	1	1	1	0.931641	0.88623	0.265869	0.789551
ACH-000273			0	0	0				0	0.0175476	0		0.227783	0.22998	0	0.406006	0	0	0.153809	0	0	0.766602	0.153198	0.708008	0.916504	0.833496	0.0249939	0.0487671	0	0.0731812	0.0434875	0.975586				0	0			0	0	0	1	0.353027	0.25	0	0.0169525	0	0.871094
ACH-000274	0.463623	0.161499	0.0904541	0.265625	0.220825	0	0.0999756	0.15271	0.25	0.239136	0.311768	0.28833	0.446533	0.561035	0.550293	0.53418	0.541504	0.449219	0.314209	0.371338	0.495117	0.203125	0.263184	0.451172	0.703125	0.373047	0.714844	0.66748	0.543457	0.685547	0.241699	0.479248	0.662598	0.920898	0.864258	0.153076	0.214233	1	1	0.5	0.616699	0.700195	0.966797	0.52832	0.503906	0.401611	0.317871	0.518066	0.586426
ACH-000276	0.460938	0.125	0.309814	0.352051	0.0499878	0	0	0.166626	0.130493	0.363525	0.195679	0.392578	0.40625	0.616699	0.513184	0.5	0.497314	0.362793	0.366211	0.211792	0.242554	0.569824	0.419189	0.712402	0.896973	0.582031	0.84082	0.927734	0.846191	0.898438	0.538574	0.70459	1	0.889648	0.976074	0.223877	0.611816	0.654785	0.781738	0.75293	0.888672	0.728516	0.617188	0.610352	0.739258	0.367676	0.115234	0.41626	0.821777
ACH-000277	0.546387	0.164917	0.363525	0.507324	0	0.0144958	0	0.132324	0.9375	0.35083	0.0625	0.0900269	0.0331116	0.0596008	0	0	0.184204		0.23999	0.040802	0.530762	0.373535	0.75	0.600098	1	0.530273	0.739258	0.979492	1	0.856934	0.523926	0.764648	0.814453	0.828613	0.770508	0.783691	0.63916	0.407471	0	0.922852	0.922852	0.922852	0.928711	1	0.45459	0.605957	0.570312	0.160034	1
ACH-000278	0.961426	0.980957	0.852051	0.962891	0.655273	0.727051	0.45459	0.799805	0.941406	0.904785	1	0.22876	0.315674	0.842285	0.421143	0.368408	0.368408	0.272705	0.828125	0.904785	0.9375	0.88623	0.938965	0.975586	0.986816	0.870117	0.958496	0.986328	0.861328	0.986328	0.833496	1	1	0.970703	1	0.871094	0.90332	0.976074	0.837402	0.974121	0.868652	1	0.894531	0.911621	0.848633	0.818359	0.756348	0.447998	0.952148
ACH-000280	0.0908813	0	0.377686	0.955566	0				1		0	0	0	0	0	1	0.739258		0.142822	0.0769043	0.0769043	1	0.980469	0.980469	1	1	1	1		1		0.973145	1	0.846191	1	0.260986	0.956543							0.631348			0.0769043	0.854004	0.888672
ACH-000281						0		0																																					1	1			1
ACH-000282																																																0.00310516
ACH-000285	0.428467	0.244873	1	1	0.394287	0.112915	0.27417	0.983398	0	0.25	0.033905	0.631348	0.285645	0.541504	0.367432	0.25	0.163208	0.243286	0.083313	0.0595093	0.0595093	1	0.428467	1	0.932129	0.514648	1	0.987793	0.804688	0.827148	0.324951	0.688965	0.930664	0.960449	0.861328	0.569824	0.341797	0.230713	0.384521	0.90918	0.88623	0.79541	1	1	0.03125	0.03125	0.806641	0.629395	0.956543
ACH-000286	0.82373	0.132324	0.459961	0.921387	0.492432	0.463379	0.219482	0.39502	0.446045	0.921875	0.461426	0.25	0.416748	0.621094	0.538086	0.45459	0.526367	0.600098	0.975098	0.975098	0.924805	0.799805	0.731445	0.92627	1	0.861328	0.977051	0.984375	1	0.992188	0.579102	0.824707	0.987305	0.820312	0.797363	0.827637	1	1	1	0.266602	0.0714111	0	0.266602	0.961426	1	0.846191	0.626953	0.980957	1
ACH-000287			1	1	1	1	0.5	0.700195	1		1	1							0.950195	0.600098	1	1	0.879883	1	1	1	1	0.75	1	0.916504	1	1	1	1	1	0.958496	0.958496			1	1	1	1	1	0.0999756	0.899902	0.964355	0.965332	0.93457
ACH-000288	0.306152	0.040802	0.106384	0.191528	0	0	0	0	0.0526428	0.449951	0.157837	0.708496	0.305664	0.388916	0.333252	0.361084	0.25	0	0.106079	0.151489	0.046875	0.319336	0.509766	0.78418	0.976562	0.651367	0.965332	0.816895	0.623047	0.716797	0.458984	0.792969	0.514648	0.543945	0.927734	0.148193	0.296387	0.458252	0.458252	0	0.481445	0.0740967	0.852051	0.606934	0.93457	0.804199	0.418213	0.558105	0.922852
ACH-000290	0.983887	0.796875	0.403564	0.157837	0.577148	0.294189	0.294189	0.0588379		0.888672		0.228027	0.349609	1	0.786621	0.922363	0.466064	0.37207	0.893555	0.942871	0.991699	0.864746	0.597656	0.739258	1	0.696777	1	1	1	0.976074	1	1	1	1	1	1	1	0.989746	0.708496	0.740723	1	0.653809	1	1	0.0444336	0.911133	0.948242	0.919434	1
ACH-000291	0.083313	0	0	0.0526428	0	0.104187	0	0.104187	0.117676		0.176514	0	0	0.25	0.0243835	0	0	0	0.0256348	0.0263214	0	0.603027	0.0344849	0.51709	0.208374	0.0400085	0.428467	0.47998	0.333252	0.280029	0.333252	0.761719	1	0.871094	0.580566										0.22583	0.354736	0.119995	0.337646	0.888672
ACH-000292	0.856934	0.5	0.666504	1	0.839844	1	1	0.444336		0.90918		0.557617	0.745117	0.960938	0.39209	0.764648	0.411865	0.777832	0.884766	0.961426	0.961426	0.945312	0.957031	0.914062	0.967773	0.967773	1	0.833496	1	0.966797	1	1	0.913574	0.98291	1	1	0.826172	0.933105	0.933105					0.888672	0.714355	0.80957	0.803711	0.926758	0.935547
ACH-000293																									0	0	1	1		0.998535
ACH-000294	0.323486	0.323486	1	1	0.540527	0.483887	0.709473	0.483887	0.666504	0.888672	0.9375	1	0.53125	0.875	0.671875	1	0.714355	0.485596	0.441895	0.411865	0.534668	1	1	1	1	1	1	0.985352	1	1	1	1	1	1	0.845215	1	1	1	0.871094	1	1	1	1	1	1	1	0.960938	0.962402	0.980957
ACH-000295	0.615234	0.384521	0.490479	0.434082	0.318115				1	0.9375	1	0.963867	0.836426	0.90918	0.727051	0.945312	0.63623	0.380859	0.813965	0.883789	0.976562	0.973145	0.98291	1	1	1	0.973145	1	1	1	1	1	0.866699	1	1	0.9375	0.9375	1	0.714355	0.5	1	0.473633	0.947266	0.961426	0.969727	0.878906	0.831543	0.701172	1
ACH-000296	0.491699	0.229492	0.1875	0.307617	0.263184				0.571289	0.552734	0.785645	0.526855	0.0392151	0.183716	0.117676	0.176514	0.215698	0.131592	0.0499878	0.033905	0.169434	0.797852	0.666504	0.87793	0.819336	0.744629	0.691406	0.680176	0.600098	0.693848	0.690918	0.799805	0.887695	0.907227	0.898926	0.552246	0.590332	0.833496	0.643066	0.634277	0.725098	0.69043	0.536621	0.643066	0.583496	0.791504	0.531738	0.577148	0.895508
ACH-000297	0.939453	0.67627	0.865234	0.865234	0.980957	0.957031	0.97168	0.856934	0.931152	0.759277	0.844727	0.881348	0.796387	0.875977	0.858398	0.973633	0.61084	0.827148	0.975586	0.901367	0.925781	0.893555	0.876953	0.842285	0.947266	0.849609	0.953613	0.971191	0.75	0.895996	0.869141	1	0.981445	0.954102	0.879395	0.993164	0.938965	0.930176	0.906738	0.96875	0.6875	1	0.90918	0.941406	0.727051	0.79541	0.827637	0.897949	0.949219
ACH-000298	1	0.952148	1	1	1	0.928711	0.357178	1	0.933105	0.95459	0.933105		0.894531	1	0.631348	1	0.894531					1	1	1	1	0.868652	0.966797	1	1	0.689453	1		1	0.714355	0.933105	0.928711	0.928711	1	1	1	1	1	0.736816	1	0.833496	0.69043	0.893555	1	1
ACH-000301	0.459961	0.0200043	0.434082	0.490479	0.333252	0.75	0.775879	0.70166	0.853516	0.727051	0.755859	0.285645	0.307617	0.743652	0.128174	0.589844	0.205078	0.54541	0.616211	0.753418	0.632324	0.837891	0.785645	0.904785	0.947754	0.866211	0.946289	0.859863	1	0.929688	0.915039	1	0.980957	0.980957	0.891113	0.856934	0.921875	1	0.950195	0.815918	0.973633	0.973633	0.842285	0.956543	0.780273	0.926758	0.924805	0.90918	0.964844
ACH-000302	0.956543	0	0	0	0.0384521	0	0	0.399902	0	0.521973	0		0	0.015625	0	0	0.015625		0.431396	0	0.254883		0.3479	1	1	0.571289	0	0	1	0	0.882324	0.0769043	1	1	1	0.682129	0.504883	0.0400085	0.600098					0.90918	0	1	0.978516	0.558105
ACH-000303	0.549805	0.295166	0.236816	0.315674	0.138916	0.363525	0.0454407	0.5	0.727051	0.88623	0.90918	0.0560608	0.106384	0.456543	0.0425415	0.148926	0.085083	0.111084	0.267578	0.225342	0.253418	0.677246	0.754395	0.964844	0.95752	0.929688	0.951172	0.952148	0.837891	0.987793	0.594727	0.975098	0.941406	1	0.901367	0.641602	0.886719	0.976074	0.902344	0.534668	0.813965	0.697754	0.744141	0.894531	0.878906	0.65625	0.661621	0.518066	0.960938
ACH-000304	0.0285645	0	0.0178528	0	0.112488	0	0	0.0188751	0.0476074	0.363525	0.0476074	0	0.416748	0.604004	0	0	0.1875	0	0.720215	0.708496	0.75	0.719238	0.0999756	0.0999756	0.333252	0.326416	0.841309	0.714355	0	0.741699	0	0.240723	0.756836	0.594727	0.378418	0.0384521	0.0384521	0	0					1	0.0588379	0.0588379	0.142822	0.030304	1
ACH-000305	0.757812	0.181763	0.474609	0.516602	0.628906	0.391846	0.60791	0.410889	0.759277	0.90625	0.722168	0.546387	0.513672	0.917969	0.688965	0.635254	0.662109	0.235352	0.631348	0.666504	0.894531	0.833496	0.899902	0.844238	0.937012	0.885254	0.966797	0.912109	0.90918	0.922852	0.927246	0.965332	0.962402	1	0.990723	0.883301	0.866699	0.838867	0.741699	0.684082	0.893066	0.964355	0.789551	0.878906	0.689453	0.896484	0.769531	0.868652	0.938477
ACH-000306	0.682129	0.494141	0	0	0.171021	0.178589	0.589355	0.482178	0.358887		0.371826	0	0.333252	0.333252	0.333252	0	0	0.0270233	0.0121918	0.0121918	0	0.416748	0.324219	0.611328	0.807129	0.310303	0.741699	0.885254	0.353027	0.760254	0.22998	0.5	0.614258	1	0.972656	0.228516	0.506836			0.170166	0.915039	0.574707	1	0.860352	0	0	0.338623	0.595215	1
ACH-000307	0.90332	0.21875	0.666504	0.952148	0.081604	0.571289	0.0714111	0.5	0.818359	0.82373	0.878906	0.0769043	0.0731812	0.5	0.0975342	0.390137	0.170776	0.0499878	0.366699	0.43335	0.583496	0.763184	0.981445	0.962891	0.97168	0.633789	0.931152	0.896484	0.90918	0.965332	0.818359	0.846191	0.986328	0.917969	0.959473	0.660645	0.731934	0.888672	0.5	0.818359	0.818359	0.818359	0.782715	0.724121	0.922852	0.703613	0.5	0.758789	0.991699
ACH-000308	0.654785	0.563477	0.731934	0.902344	1	0.872559	0.595703	0.638184	0.785645	0.523926	0.744141	0.116516	0.0847168	0.529785	0	0.277344	0	0	0.169189	0.276855	0.384521	0.708496	0.893066	1	0.983398	0.983398	1	0.95166	1	1	1	1	0.941406	0.882324	0.888672	0.965332	0.51709	0.75	1	0.285645	1	1	1	0.919922	1	1	0.660156	0.802734	1
ACH-000309	0.282959	0	0.108704	0.304443	0.142822	0.382324	0.5	0.558594	0.45459	0.611816	0.696777	0.228027	0.538574	0.777832	0.814941	0.814941	0.666504	0.199951	0.534668	0.413818	0.534668	0.35083	0.866699	0.816895	0.666504	0.521973	0.814941	0.938477	1	0.9375	0.902344	0.868652	0.98584	0.942871	0.98584	0.607422	0.719727	0.744141	0.930176	1	0.87793	0.87793	0.79248	0.956543	0.788574	0.722168	0.373047	0.712402	0.929688
ACH-000310	0.0166626	0.0163879	1	1								1	1	1	1	1	1		0	0	0	1			1	0	1	1		1			1	1	0.960938	0.638184	0.713379							0.472168	1	1	1	0.525391	1
ACH-000311	0.325684	0.0465088	0.317139	0.317139	0	0	0	0		0.386475		0.276855	0	0.276855	0.0454407	0.0454407	0.0454407					0.509277	0.475098	0.683105	0.714355	0.428467	0.5	0.703613	1	0.703613	0	1	1	1	0.848633	0.289795	0.391357	0.521973	0	1	1	1	0	1	0.521973	0	0.57373	0.0109863	0.916016
ACH-000312	0.770996	0.574707	0.871582	0.717773	0.899902				1	1	1	0.90918	0.571289	0.928711	0.833496	0.928711	0.547852	0.439941	0.660156	0.859863	0.939941	0.984863	0.973633	1	1	1	1	1	1	1	0.967773	1	0.964355	1	0.833496	0.869629	0.804199	0.615234	0.769043	1	0.856934	0.928711	1	1	0.944336	1	0.789551	0.976562	1
ACH-000313	1	1	0.866699	0.966797	0.95459	0.972168	0.444336	0.638672	1	0.702637	0.0769043	1	0.527832	0.722168	0.666504	0.722168	0.694336	0.22583	0.702148	0.95752	0.82959	0.961426	1	0.924316	1	0.879395	0.952148	0.983887	0.980957	0.968262	1	1	1	1	1	0.82373	0.870605	1	0.90918	0.833496	1	0.933105	0.866699	1	1	1	0.992188	0.973145	0.969238
ACH-000314	0	0.0499878	0	0.083313	0	0	0	0.25		0.153809		0.549805	0.03125	0.6875	0.375	0.3125	0.03125	0.119995	0	0	0.166626															0	0								0.577148	0.464355	0.435791	0.5
ACH-000315	1	0.710938	0.0681763	0.133301	0.296387	0.5	0.114258	0.971191	0.606934	0.5625	0.643066	0.430664	0.677734	0.525391	0.966309	0.966309	0.946289	0.444336	0.851074	0.869629	1	1	0.516602	0.916504	1	1	0.981445	0.980957	0.875	0.905762	1	1	1	1	0.953125	0.148193	0.592773	0.90918	0.45459	1	0.856934	1	0.643066	1	0.888672	0.111084	0.367188	0.986816	0.983887
ACH-000316	0.505859	0.333252	0	0.0227203	0.00806427	0.0333252	0	0.0333252	0.342041	0.195068	0.342041	0.117676	0	0.8125	0.185181	0.60498	0.199951	0	0.126709	0.169067	0.171387	0.15686	0.296875	0.806641	0.51709	0.402344	0.114746	0.522949	0.234619	0.645996	0.0124969	0.458252	0.987305	0.974121	0.777832	0.0370483	0.0370483	0.370361	0.296387	0.370361	0.552734	0.315674	0.342041	0.199951	0.449951	0.125	0.0448608	0.027771	0.629395
ACH-000317	1	0.481445	0.366699	0.5	0.771484	0.419434	0.0322571	0.0322571	0.666504	0.922852	0.615234	0.464355	0.227295	0.931641	0.40918	0.977051	0.477295	0.45459	0.346191	0.538574	0.922852	0.941406	0.720215	1	1	1	0.960938	0.960938	1	0.959961	0.970703	0.80957	0.928711	1	0.797363	0.660156	0.939941	1	1	1	1	1	0.476074	1	0.571289	0.856934	0.681152	0.990234	0.967773
ACH-000318	0.449951	0.0999756	0.241699	0.252686	0.102539	0.0476074	0	0.333252	0.631348	0.530273	0.700195	0.322998	0.0493774	0.590332	0.0731812	0.113953	0.144531	0.0454407	0.489258	0.372314	0.606445	0.79834	0.681152	0.921387	0.930176	0.664551	0.911133	0.838867	1	0.89209	0.663574	0.824219	0.816895	0.964844	0.810059	0.524902	0.437988	0.384521	0.458252	0.304443	0.48877	0.681641	0.70459	0.583496	0.386719	0.486572	0.228516	0.405029	0.980469
ACH-000319			1	0.992676								0.915527	0	1	1	1	1	0.83252				0.0142822											1	0.870605	1										1	1	1	0.983398	1
ACH-000320	0.333252	0.027771	0.45459	0.788086	0.772949	0.166626	0	0.5	0.888672	0.666504	0.888672	0.263672	0.107117	0.339355	0.303467	0.399902	0.25	0.0814209	0.472412	0.41748	0.373535	0.33667	0.715332	0.930664	0.922852	0.897461	0.70752	0.753418	0.555664	0.56543	0.666504	0.922852	0.789062	1	0.98877	0.600098	0.799805	0.465088	0.302246	0.777832	0.555664	1	0.615234	0.366699	0.521973	0.608887	0.152344	0.0633545	1
ACH-000321	0.947266	0.579102	0.913086	0.913086					0.818359	1	0.90918	0.859863	0.628418	1	0.399902	0.942871	0.542969	0.941406	0.939453	0.969727	0.818359	0.888672	0.953125	1	0.956543	0.895996	0.962891	0.905762	1	0.924316	0.944336	0.966797	1	0.980957	1	0.963867	0.945312	1	1	0.9375	0.969727	1	0.90625	1	0.882324	0.82373	0.935059	0.960449	0.977051
ACH-000322	0.0625	0.0375061	0.196411	0.0333252	0	0	0	0	0.238037	0.235962	0.0908813	0.016037	0.0755005	0.15686	0	0.115356	0.0377502	0	0.114563	0.127686	0.127686	0.356445	0.22583	0.363525	0.319336	0.235352	0.275879	0.217407	0.13562	0.114258	0.0588379	0.303711	0.285645	0.619629	0.384521	0.265381	0.0908813	0.153809	0.280029	0	0.344727	0.258057	0.0999756	0.583496	0.170166	0.212769	0.0785522	0.0772705	0.480469
ACH-000323	0.616211	0.30127	0.15625	0.185547	0.0999756	0.0370483	0	0.115356	0.230713	0.365479	0.307617	0.289062	0.485596	0.914062	0.742676	0.742676	0.600098	0.266602	0.414307	0.28833	0.441406	0.583496	0.224121	0.339111	0.594238	0.382324	0.583496	0.779785	0.841309	0.67334	0.5	0.549805	0.983398	1	0.835938	0.523438	0.484131	0.641113	0.421143	0.394043	0.585449	0.641113	0.585449	0.842285	0.431885	0.522949	0.474365	0.788086	0.992188
ACH-000324	0.0384521	0	0.142822	0.0476074	0.272705	0.166626	0.0908813	0.25	0.176514	0.518555	0.176514	0	0.0499878	0.700195	0.0499878	0.150024	0.0499878	0	0.0322571	0.0322571	0.0322571	0.25	0.339355	0.367432	0.846191	0.641113	0.0681763	0.291748		0.541504		0.649902	1	1	0.919922	0.208374	0.229126	0.470703	0.470703					0.45459			0.5	0.460449	0.692383
ACH-000325	0.883789	0.255859	0.296387	0.870605	0.625	1	0.375	0.625	0.708496	0.93457	0.708496	0.0208282	0.123596	0.482666	0.0674438	0.38208	0.112366	0.145508	0.253418	0.121643	0.391846	0.741211	0.437988	0.961914	0.54541	0.742188	0.90332	0.935547	0.984375	0.967773	0.876953	1	0.541016	1	0.930176	0.412598	0.654297	0.714355	0.619141	0.918945	0.945801	0.861328	0.973145	0.63623	0.959961	0.959961	0.539062	0.416748	0.989258
ACH-000326	0.102051	0.020401	0.0333252	0.0169525	0.194458	0.0416565	0	0	0.649902	0.266602	0.150024	0.09375	0.0238037	0.121948	0.0714111	0.0952148	0.0714111	0.153809	0.853516	0.283691	0.399902	0.910645	0.59082	0.806152	0.847656	0.474609	0.777832	0.672852	0.93457	0.872559	0.688477	0.780273	1	0.958984	0.740234	0.3479	0.586914	0.766602	0.266602	0.916504	0.945801	0.811035	0.783691	0.619141	0.807617	0.846191	0.980957	0.399902	0.911133
ACH-000327	0.0930176	0	0.67334	0.0400085	0	0.733398	0	0.166626	0	0.45459	0.227295	0	0	0	0	0	0	0	0	0.0999756	0.0999756	0.464355	0.477295	0.5	0.300049	0.314209	1	1	0.460693	1	0.459961	1	0.697754	1	0.977051	1	1	0	0	0	1	0.294189	0.684082	0.966797			0.0288391	0.431396	1
ACH-000329	0.105286	0	0	0	0	0.0102005	0.0102005	0.040802	0.138916	0.25	0.159424	0.206543	0.393555	0.590332	0.590332	0.57373	0.557617	0.0322571	0.577637	0.0222168	0.355469	0.858887	0	0.731445	0.853027	0.294189	0.866699	0.733398	0.628418	0.813477	0.0129852	1	0.956055	1	0.246338	0.232544	0.186035	0.638672	0.51416	0.960938	0.884766	0.961426	0.865234	0.922852			0.138306	0.705566	0.963379
ACH-000330	0.439941	0.0416565	0.207764	0	0	0.0908813	0	0		0.314697		0	0.112671	0.391357	0.112671	0.197144	0.281738	0.125	0	0	0.111084	0.333252	0.612793	0.741699	0.63623	0.5	0.880859	0.880859	0.631348	0.856934	0.947266	1	0.846191	1	1	1	0.769043	0.846191	0.538574					0.866699	0.62793	0.395264	0.837402	0.0888672	1
ACH-000331	0.888672	0.63623	0.206299	0.620605	0.483887	0.681641	0.0454407	0.523926	0.838867	0.444336	0.806641	0.791504	0.346924	1	0.469482	0.571289	0.0499878	0.176514	1	1	1	0.203369	0.80957	0.666504	0.516113	0.709473	0.76123	0.986328	0.859375	0.984375	0.797852	0.90918	1	1	0.980957	0.431396	0.674805	1	0.625	0.523926	0.952148	0.952148	0.238037	0.583496	0.769043	0.230713	0.161255	0.584473	0.816895
ACH-000332	1	0.956543	0.98584	0.957031	0.692383	0.666504	0.799805	1	0.856934	0.925781	0.952148	0.0666504	0.199951	0.661621	0.246094	0.412598	0.246094	0.5	0.905762	0.965332	0.974121	0.963867	0.927246	0.975586	0.981445	0.981445	0.990234	1	0.953613	0.962891	0.990723	0.976562	0.960938	0.983887	0.968262	0.944824	0.881836	0.976562	0.930176	0.541504	0.847168	0.902832	0.718262	0.956543	0.813965	1	0.914062	0.746094	0.994141
ACH-000333	1	0.993652								0.777832		0.0425415	0	0	0	0	0					0.130981	0.546875	1			1	1		1						1	1							1					1
ACH-000334	0.941406	0.882324	0.588379	0.0588379	0.181763	0.8125	0.4375	0.4375		0.641113		0.691406	0.365967	0.575195	0.926758	0.902344	0.951172		0.969727	0.969727	0.969727	0.787109	0.600098	0.884766	1	1	0.945801	0.973633	1	1	0.619141	1	0.807617	0.807617	0.807617	0.166626	0.111084	0.941406	0.941406	1	1	0.875	1		0.25	0.631348	0.441895	0.559082	1
ACH-000335	0.362061	0.0172424	0.0602417	0	0	0.0999756	0	0.0908813	0.52002	0.619141	0.47998	0.0438538	0	0.25	0.0888672	0.0681763	0.0666504	0.0625	0.199951	0.0545349	0.145508	0.893066	0.887695	1	0.910156	0.79541	0.861328	0.890625	0.928711	0.794434	0.731934	0.913086	0.903809	0.987793	0.928711	0.711426	0.769043	0.333252	0.486572	0.238037	0.487793	0.547852	0.380859	0.625	0.952148	0.761719	0.199951	0.90625	0.97998
ACH-000336	0.95752	0.5	0.714355	0.90625	0.333252	0.291748	0.083313	0.652344	0.95459	0.690918	0.63623	0.893066	0.61377	0.911133	0.558594	0.774414	0.568848	0.620605	0.723633	0.510742	0.652344	0.682617	0.904785	0.944336	0.965332	0.971191	0.964844	0.943848	0.862793	0.98584	0.513672	0.939941	0.942383	0.937012	0.884277	0.975586	0.945312	0.882324	0.941406	0.956543	0.916504	0.75	0.875	1	0.853516	0.926758	0.966309	0.922852	1
ACH-000338	0.693359	0.177368	0.291748	0.575195	0.45459	0.5	0.600098	0.777832	0.652344	0.5625	0.695801	0.830566	0.657715	0.888672	0.864746	0.986328	0.959473		0.536621	0.410156	0.769043	0.655273	0.552734	0.802734	0.930176	0.686035	0.973145	0.960938	0.953613	0.895996	0.678223	0.797852	0.991211	0.974121	0.940918	0.509766	0.547852	0.799805	0.69043	0.838867	0.9375	0.967773	0.838867	0.882324	0.938965	0.799805	0.525391	0.493164	0.950684
ACH-000340	0.605469	0.363525	0.0389709	0.584473	0	0.28125	0.296875	0.0625	0.135132	0.557617	0.552734	0.416992	0.261719	0.476562	0.261719	0.401123	0.383789	0.0208282	0.0961304	0.0192261	0.105774	0.768555	0.47998	0.75293	0.881836	0.583984	0.729004	0.645508	0.319092	0.518066	0.085083	0.75	0.81543	0.854492	0.634766	0.284424	0.456787	0.63623	0.404785	0.444336	0.652344	0.456543	0.311035	0.194458	0.72998	0.310059	0.474121	0.260498	0.826172
ACH-000341	0.20752	0	0	0	0.0270233	0	0.151489	0	0	0.242432	0.0238037	0.145142	0.328857	0.338135	0.324219	0.324219	0.271484	0.147095	0.0634766	0.0158691	0.0634766	0.260986	0.154907	0.171875	0.197632	0.195435	0.230713	0.208374	0.223877	0.1875	0.147095	0.266602	0.11322	0.11322	0.130859	0.0326233	0.0108719	0	0	0.0999756	0.085083	0.0212708	0	0.169434	0.208374	0.145874	0.052948	0.102295	0.131714
ACH-000342	1	0.600098	1	1	0.354736	0.826172	0.260986	0.826172	1		1	0	0	0.25	0	0	0.129028	0.055542	0.0769043	0	0	0.5	0.853027	1	1	0.913086	1	1	1	1	1	0.711426		1	0.875					1	0.54541	1	1	0.799805	0.706055	0.470703	0.796387	0.744629	0.875
ACH-000343	0.5625	0			0.6875	0.0625	0	0.0714111		0.666504		0.197144	0.351318	0.702637	0.324219	1	0.756836	1	0.771484	0.657227	0.657227	0.565918	1	1	1	1	1	0.853516	1	1	0.833496	1	1	0.978027	0.9375	0.818359	0.621094	1	0.777832	1	1	1	1		0.880371	0.835938	0.447021	1	0.912109
ACH-000344	0.742188	0	0.188354	0.671387	0.00699234	0.168335	0.0999756	0.247314	0.564453	0.620117	0.85498	0.50293	0.15332	0.733398	0.0882568	0.199951	0.110291	0	0.311523	0.31958	0.450928	0.982422	0.883301	0.899902	0.913086	0.941895	0.992676	1	0.787598	0.924805	0.982422	0.922852	0.977539	0.943359	0.865234	0.75	0.828613	0.981445	0.981445	0.848633	0.818359	0.969727	0.0606079	0.729004	0.894043	0.95459	0.25293	0.395752	0.97168
ACH-000345	0.977051	0.809082	0.5	0.333252	0.905762	0.967285	0.967285	0.583496	0.799805	0.941406	1	0.962891	0.936035	0.992188	0.832031	0.992188	0.685547		0.352295	0.830078	0.715332	0.962891	1	1	1	0.984375	0.952148	1	0.976074	0.952148	1	0.987793	0.846191	1	0.975098	1	1	0.986328	0.986328	0.818359	1	0.977051	0.568359	1	1	1	0.840332	0.597656	1
ACH-000346						0	0	0		0.0192261															1	1	1	1	1	0.996094	1		0.995117	1	1					1	0	1	0.98291				1	0
ACH-000347			1	1		0.363525	0.136353	0.714355	0.962891	0.941406	0.962891	1	0.703613	1	0.740723	0.888672	0.592773	0.815918	1	1	1	0.976562	0.993652	1	1	1	0.555664	1	1	1	1		0.64502	1	1	0.630859	0.796875	0.787109	0.787109					1	1	0.891113	0.937988	0.834961	1
ACH-000348	0.030304	0.030304	0.0333252	0.0333252	0	0	0	0	0.0625	0.0999756	0.0625	0	0	0.0666504	0.0645142	0	0.0322571		0.0625	0.0322571	0.0666504	0.180054	0.408203	0.489746	0.432373	0.162109	0.461426	0.350098	0	0.25	0	0.708496	0.458252	0.770996	0.770996	0.0285645	0.142822	0	0	0.0465088	0	0	0	0.25			0.046875	0.0634766	0.537109
ACH-000349	0.388916	0	0.199951	0.439941	0.133301	0.0800171	0	0.0800171		0.300049		0.0566101	0.19043	0.714355	0.333252	0.428467	0.380859	0.117676	0.304443	0.304443	0.478271	0.391357	0.75	0.875			1	1	0.846191	1	0.538574	1	1	1	1	0.782715	0.739258	0.625						0.583496	0.357178	0.0714111	0.111084	0.244873	0.877441
ACH-000350	0.95752	0.859375	0.853027	0.896973	0.945801	0.6875	0.8125	1	0.966797	1	1	0.411865	0.492432	0.92627	0.426514	0.646973	0.264648	0.32251	0.777832	0.901367	0.975098	1	0.895508	1	1	0.93457	1	1	1	1	1	0.95459	0.973145	0.972168	0.916504	0.947266	1	0.952148	0.952148	1	0.0512695	1	0.974121	0.926758	1	1	0.910156	0.982422	1
ACH-000351	0.86377	0.820312	0.846191	0.890137	0.818359	1	1	0.869629	0.875	0.8125	0.899902	0.0474243	0.00819397	0.0416565	0.00819397	0	0.00819397	0.0126572	0	0.0104675	0	0.950195	0.877441	0.976562	0.961914	0.950684	0.918457	0.908203	0.901855	0.938965	0.890625	0.981445	0.926758	0.989746	0.937988	0.933105	0.944336	0.700195	0.536133	0.127686	0.204346	0.563965	0.108704	0.184814	0.959473	0.949707	0.911621	0.941895	0.976562
ACH-000352	0.9375	0.375	0.799805	0.799805	0.315674	0.235352	0.0588379	0.294189	1	0.799805	1	0.600098	0.444336	0.722168	0.833496	0.722168	0.333252	0.916504	0.291748	0.458252	0.833496	0.876953	0.813965	1	0.897461	1	0.828125	0.9375	0.888672	1	0.755371	0.871582	0.947266	0.982422	0.982422	0.856934	0.875	0.611328	0.722168	0.799805	0.324951	0.850098	0.899902	0.764648	0.922852	0.538574	0.797363	0.917969	0.934082
ACH-000353	0.164429	0	0.081604	0.163208	0.120483	0.153809	0.0769043	0.0769043	0.5	0.633301	0.5	0.0119019	0.123718	0.191528	0.102051	0.122437	0.0315857	0.0149231	0.0666504	0.00746155	0.119385	0.150024	0.429932	0.569824	0.918945	0.68457	0.834961	0.709473	0.494629	0.532715	0.423828	0.60791	0.895996	1	0.752441	0.252441	0.343506	0.355957	0.375977	0	0	0.0175476	0.175415	0.305176	0.415771	0.505859	0.452881	0.512207	0.492676
ACH-000354	0.217041	0.11322	0.361816	0.228516	0.269287	0.431152	0.146729	0.146729	0.563477	0.56543	0.727051	0.251465	0.00980377	0.149292	0.00485611	0.180542	0.009758	0.074646	0.247192	0.375	0.318115	0.387695	0.520508	0.513672	0.907715	0.633789	0.868164	0.479492	0.455811	0.410889	0.18457	0.388916	0.609375	0.625	0.59375	0.5	0.473633	0.539551	0.46582	0.31665	0.233276	0.399902	0.241333	0.588379	0.360596	0.327881	0.538574	0.558105	0.874023
ACH-000355	0.40918	0.0908813	0.785645	0.866699	0.375					0.59082		0.5	0.0908813	0.59082	0.363525	0.54541	0.318115	0	0.0476074	0	0.0499878	0.622559	0.586914	0.5	0.666504	0.521973	0.592773	0.678711	0.80957	0.714355	0.54541	0.648438	1	0.978516	0.702148	0.538574	0.846191			1	1	1	1	0.727051	0.681641	0.772949	0.426758	0.662109	0.879395
ACH-000356			0.998047	1	0					1									0.544434	0.997559	0.997559		0.996094	0.996094	1	1						0.995605	0.992676	1	0.985352			1	1					0.995117			0.976562		0.998047
ACH-000357	0.0161285	0	0.137939	0.258545	0.0444336	0.899902	0.0499878	0.75	0	0.0434875	0.0908813	0.0149231	0.25708	0.608887	0.199951	0.371338	0.385742	0	0.695801	0.282715	0.293457	0.57373	0.109375	0.890625	0.923828	0.88623	0.955566	0.911133	0.952148	0.844238	0.987793	0.803711	0.396729	0.390625	0.46875	0.0922852	0.0153809	0.846191	0.640137	0.714355	0.5	0.571289	0.5	0.561035	0.0952148	0.142822	0.0908813	0.0324402	0.325195
ACH-000358	0.899902	0.902344	0.975098	1	0.904785	0.75	0.8125	0.384521	0.931152	0.779297	0.833496	0.325195	0.4375	0.8125	0.3125	0.6875	0.5	0.3479	0.70459	0.697754	0.790527	0.897949	0.961426	1	0.944336	0.981445	0.851074	0.856934	0.859863	0.816406	0.929688	0.941406	0.962891	0.942383	0.944336	0.966309	0.949219	1	1	0.952148	1	0.856934	0.818359	0.700195	0.652344	0.913086	0.942383	0.902344	1
ACH-000359	0.69043	0.168091	0.325928	0.758789	0.414307	0	0.133301	0.133301	0.411865	0.442871	0.5	0.0606995	0.666504	0.970215	0.649902	0.529785	0.18811	0.046875	0.196777	0.272705	0.265869	0.828125	0.571289	0.955078	0.890625	0.630371	0.873047	0.891602	0.835449	0.909668	0.845215	0.709473	0.890625	0.917969	0.910645	0.579102	0.443115	0.23938	0.314209	0.478271	0.608887	0.608887	0.916504	1	0.838379	0.84082	0.583496	0.787598	0.98291
ACH-000360	0.772949	0.772949	0.833496	0.814941	1	0.769043	0.444336	1	1	0.806641	1	0	0.0217438	0.0666504	0	0.0217438	0.0652466	0	0	0	0.0222168	0.508301	0.875	1	0.890137	0.755859	0.717773	0.974121	1	1	1	0.75	0.9375	0.969727	0.939453	1	0.787109	1	1	0.931641	1	1	0.88623		1	1	0.336182	0.514648	0.989746
ACH-000361	0.736816	0.5	0.434814	0.52002	0.411865	0.428467	0.0714111	0.357178		0.538574		0.0724487	0.643066	0.785645	0.785645	0.785645	0.428467		0.793945	0.793945	0.853027	0.727051	0.563965	0.815918	0.894043	0.788086	0.899902	1	1	0.931152	0.700195	0.5	0.879883	1	1	0.774902	0.725098							1	0.931152	0.689453	0.633301	0.71582	0.978516
ACH-000362	0	0	0.523926	0.428467	0				0.653809	0.615234	0.961426	0.223389	0	0.674805	0.274902	0.375	0.0249939	0.788086	0.693848	0.23999	0.160034	0.90918	0.522949	0.922852	1	0.375	1	1	1	0.990234	1	0.991211	1	0.799805	1	0.539551	0.54541	1	1	0.944336	0.90918	1	1	0.899902	0.882324	0.944336	0.953125	0.590332	1
ACH-000363	0.9375	0.03125	0.764648	0.941406		0.25	0	0.083313		0.449951		0.854004	0.822266	1	1	0.911133	0.523926	0.75	0.269287	0.740723	0.555664	1	1	1	0.864746	0.89209	0.856934	1	1	0.805664	0.700195	0.777832	0.973145	1	0.736816	1	0.799805	1	0.961426	0.888672	0.962891	1	1	1	0.850098	0.75	0.758789	0.963867	1
ACH-000364	0.0101013	0.0505066	0.0088501	0.0531006	0.0666504	0.083313	0	0	0.0499878	0.210571	0.199951	0.014595	0.0117645	0.0588379	0.0465088	0.0823364	0.0232544	0.0512695	0.182617	0.0260925	0.199951	0.35376	0.283203	0.278076	0.350586	0.224121	0.532715	0.615234	0.314697	0.461426	0.292236	0.23877	0.432617	0.822754	0.659668	0.381348	0.245728	0.396484	0.25	0.150513	0.239136	0.279541	0.17395	0.270264	0.255859	0.357178	0.180176	0.0167389	0.508789
ACH-000365	0	0.5	0.714355	0.952148	0.407471	0.210571	0.368408	1	0.856934		0.952148	0.820312	0.555664	0.777832	0.5	0.411865	0.777832	0.333252				1	0.304443	0.956543	1	0.696777	1	1	0.720215	1	0.799805	1	1	1	1	0.977051	0.976074			1	1	1	1	0.899902	1	0.461426	0.486572	0.822754	0.894043
ACH-000366	0.139526	0.0697632	0	0	0	0	0	0	0	0.180054	0	0.391357	0.119995	0.219971	0	0.119995	0	0.111084	0	0	0.122803	0.177246	0	0.127319	0.17395	0.217407	0.350098	0.508301	0.199951	0.24585	0.0888672	0.297852	0.296875	0.859375	0.571289	0.0517273	0.172363	0.608887	0.217407	0.0645142	0.290283	0.193604	0.161255	0.600098	0.326172	0.195679	0.237061	0.475342	0.628906
ACH-000367	0.466553	0.116638	0.0602417	0.0602417	0.183105	0.25	0.0625	0.139282	0.326904	0.694336	0.20752	0.440918	0.170166	0.434814	0.188843	0.333252	0.244385	0.0638428	0.268799	0.230713	0.206909	0.550781	0.348389	0.5	0.731934	0.602051	0.542969	0.524902	0.691406	0.516602	0.444336	0.51416	0.841309	0.888672	0.757324	0.113647	0.166626	0.222168	0	0.739258	0.739258	0.685547	0.757324	0.428467	0.594727	0.324219	0.472168	0.343506	0.952148
ACH-000368	0.0133362	0.0133362	0	0.0210571	0.0344849	0.0357056	0.107117	0.0370483	0.222168	0.0999756	0.300049	0.0559082	0.0476074	0.238037	0.0476074	0.333252	0.0476074	0	0.115356	0.0196075	0.137207	0.259766	0.461426	0.128174	0.373535	0.593262	0.638184	0.477051	0.0243835	0.192627	0	0.214233	0.791992	0.842285	0.480957	0.307617	0.115356	0.553223	0.425537	0.199951	0.19043	0.19043	0.0476074	0.150024	0.112915	0.241943	0.233032	0.276855	0.887695
ACH-000369	1	0			1	1	0	0	1	0.620605	0.835449	0.971191	0	1	0	1	0	0.0769043	1	1	1	1	1	1	1	1	1	1	1	1	1	1	1	1	0.856934	0.666504	0.98877							1	0.941406	1	1	1
ACH-000370	0.413574	0.0761719	0	0.0638428	0	0.0214233	0.0714111	0.0175476	0.0377502	0.142822	0.0566101	0	0.103455	0.236328	0.189697	0.105286	0.421143	0.441162	0.205078	0.410156	0.324707	0.568848	0.20874	0.25	0.51123	0.0795288	0.553223	0.647461	0.608398	0.721191	0.208374	0.883301	0.88623	0.67041	0.306885	0.182495	0.375977	0.580566	0.193604	0.229492	0.327881	0.350098	0.516113	0.87793	0.796387	0.677734	0.015152	0.480225	0.858398
ACH-000371	0.534668	0.80957	0.438965	1	0.646973	0.86377	0.772949	0.380859	0.0908813	0.879883	0.666504	0.971191	0.633301	0.950195	0.5	0.983398	0.350098		0.375	0.208374	0.739258	0.841797	0.243286	0.513672	0.63623	0.515137	1	0.975098	1	1	0.868652	1	1	1	1	0.111084	0.377686	1	1					0.916504	1	1	0.809082	0.486816	0.890625
ACH-000372	1	0.979004	0.963867	0.981934	1				0.916504	0.93457	0.916504	0.975098	0.856934	0.952148	0.952148	0.904785	0.904785	0.736816	0.953125	0.968262	0.983887	0.966797	1	0.965332	0.938965	0.987793	0.958008	0.989258	0.978027	0.947266	0.945801	1	0.960449	1	0.921387	0.958496	0.979492	1	1	0.852051	0.821289	0.928711	0.888672	1	0.90918	0.88623	0.985352	0.970703	0.98291
ACH-000373	1	0.620117	0.267822	0.696289		0.615234	0.615234	0.692383	0.54541	0.931641	0.75	0.846191	0.669434	1	0.98291	1	0.949219	0.803711	0.963867	0.980957	0.980957	0.810547	0.858887	0.987305	1	0.727051	1	0.920898	1	1	0.444336	1	0.745605	0.964844	0.90332	0.724121	1	1	1	0.803711	1	1	1	1	1	0.852051	0.708008	0.850098	0.90918
ACH-000374	0.533203	0.0897217	0.405029	0.410156	0.239136	0.139526	0.0465088	0.488281	0.90918	0.945801	0.90918	0.18689	0.697754	0.916016	0.821289	0.958496	0.354248	0.125	0.539551	0.619141	0.873047	0.687988	0.881836	0.992676	0.967285	0.915039	0.975098	1	0.990723	0.983398	0.899902	1	0.864746	1	0.984863	0.787109	0.811523	0.879883	0.859863	0.936523	0.911621	0.936523	0.974121	0.666504	0.766602	0.783203	0.703125	0.910156	0.983398
ACH-000375	0.745117	0.548828	0.692383	0.692383	0.652344	0.277832	0	0.555664	0.706055	0.791504	0.6875	0.543945	0.839355	1	0.888672	0.987793	0.620117	0.0588379	0.238037	0.547852	0.780273	0.882324	0.947266	0.973633	0.980957	0.692383	1	1	0.958984	0.833496	0.6875	1	1	0.911133	0.869629	0.855469	1	1	1	1	0.928711	1	1	0.9375	0.967773	0.5625	0.466553	0.503906	0.907715
ACH-000376	0.125	0	0	0	0	0	0	0	0	0.0344849	0	0.108704	0.083313	0.404297	0.395752	0.166626	0.0208282	0	0.166626	0	0	0.263184	0.125	0.385986	0.209106	0.136353	0.405029	0.228882	0.128174	0.421631	0	0.258057	0.340088	0.669922	0.469971	0	0.0999756	0	0.0222168	0.171387	0.140869	0.0999756	0.0985718	0.333252	0.263184	0.150024	0.030304	0.0722656	0.195679
ACH-000377	0.729004	0.291748	0.78418	1	0.102966	0.3125	0.34375	0.625	0.838867	0.941406	0.935547	0.237671	0.0263214	0.280029	0.144775	0.213379	0.157837	0	0.320801	0.349121	0.726562	0.524902	0.602051	0.978516	0.927734	0.666504	0.929688	0.929688	0.933105	1	0.394775	0.894043	1	1	0.931152	0.552246	0.629883	1	0.791504	0.744141	0.790527	1	0.62793	0.538574	0.75	0.75	0.322021	0.734863	1
ACH-000378	0.152222	0.0217438	0.020401	0.0612183	0					0.0625		0	0.0222168	0.0681763	0.0222168	0.0222168	0	0.0400085	0	0.033905	0.0169525	0.37793	0.0689697	0.521484	0.550781	0.285645	0.5	0.575195	0.524902	0.449951	0.281982	0.727051	0.914062	0.956543	0.893555	0.0697632	0	0.150024	0.170776	0.470703	0.353027	0.0588379	0.0588379	0.272705	0.513672	0.189209	0.0322571	0.295166	0.981934
ACH-000379	1	0.721191	0.775391	0.979492		0.746582	0	0.436523	0.958496	0.649902	0.958496		0.654785	0.981934	0.90918	0.963867	0.981934	0.612793	1	0.333252	1	0.660156	0.991211	0.981934	1	1	1	1	1	0.387207	1	1	1	1	1	0.476074	1	1	1	0.97998	0.97998	0.97998	0.529297	1	0.790527	0.790527	0.668945	0.977539	1
ACH-000380			0	0					0.967773		0.978516							1	1	1	1				0	0	1	1		1			1	1	1	0	0.991211							0.98877			0		1
ACH-000381	0.700195	0.300049	0.346191	0.846191	0.449951	0.685547	0.371338	0.0285645	0.952148	0.473633	0.952148	0.0678101	0.0285645	0.147095	0.0294189	0	0	0	0.0625	0.0634766	0.19043	0.837891	0.482666	0.896484	0.829102	0.658691	0.953125	0.984375	0.961426	1	0.961426	0.825195	1	1	0.772949	0.448242	0.620605	0.860352	0.674316	0.736816	0.947266	0.789551	0.842285	1	0.846191	0.897461	0.283691	0.367188	1
ACH-000382	0.976074	0.845215	0.846191	1	0.966797	0.856934	0.856934	0.853516	0.875	0.804199	0.950195	0.981445	0.696777	0.90918	0.848633	0.894043	0.833496	0.833496	0.888672	0.814941	0.814941	1	0.977051	0.870117	0.939453	0.878906	0.914062	0.903809	1	0.980957	1	0.987793	0.866699	0.977539	0.978027	0.968262	0.968262	0.933105	1	0.971191	1	1	0.971191	0.625	0.158691	0.92041	0.983887	0.967773	0.975586
ACH-000383	0.986816	0.146606	0.29834	0.438477	0.633301	0.680664	0	0.304443	0.217407	0.793457	0.3479	0.310791	0.324463	0.696289	0.289551	0.570312	0.35083	0.0769043	0.833496	0.733398	0.844238	0.708008	0.262451	0.786621	1	0.769043	0.84375	0.894043	0.830566	0.774414	0.643555	0.847168	0.849121	0.995605	0.995605	0.146484	0.267578	0.95459	0.63623	1	1	0.975586	0.804688	1	0.816406	0.419922	0.437988	0.481201	1
ACH-000384	0.272705	0.0908813	0	0	0	0	0	0.0999756	0	0.368408	0.300049	0.0560608	0	0.117676	0.055542	0	0	0	0.055542	0.0188751	0.0566101	0.257812	0.192749	0.392822	0.441162	0.372559	0.358154	0.416748	0.163208	0.30127	0.199951	0.224121	0.805664	0.970215	0.67334	0.199951	0.278809	0.0294189	0	0.184204	0.157837	0.105286	0.199951	0.40625	0.266602	0.266602	0.197876	0.0394592	0.881348
ACH-000386					1	0.984375	0.484375	0.491943										1	0.989258	1	0.989258	1	1	1	1	1						0.947266	1	1	1			0	1					1			0.98584	1	1
ACH-000387	0.425049	0.0512695	0.1698	0.320801	0.3125	0.259277	0.148193	0.0370483	0.394043	0.279053	0.424316	0.360107	0.163208	0.5	0.142822	0.395752	0.204102	0.263184	0.213135	0.24585	0.31665	0.457031	0.385498	0.530273	0.590332	0.606445	0.585449	0.566406	0.523926	0.445801	0.515625	0.351562	0.927734	0.956055	0.896973	0.355957	0.40918	0.533203	0.387207	0.510742	0.489258	0.531738	0.297852	0.838867	0.260986	0.958496	0.458008	0.42749	0.912109
ACH-000388	0.700195	0	0.956543	1	0.916504	0.950195	1	0.631348	0.0263214	0.538574	0.236816	0.135376	0.226929	0.504395	0.462158	0.00839996	0.285645	0	0.655273	0.275879	0.655273	0.444336	0.166626	0.595215	0.876465	0.739746	1	1	1	0.910645	0.625	1	1	1	0.767578	0.113647	0.113647	0.8125	0.8125					1	0.368408	0	0.447754	0.321045	1
ACH-000389	0.278564	0.120544	0.136719	0.116638	0.159058	0	0.111084	0	0.25	0.378418	0.25	0.184692	0.178589	0.678711	0.303467	0.519043	0.291016	0.281982	0.288574	0.343018	0.459229	0.414062	0.446533	0.739746	0.771973	0.447754	0.689941	0.942871	0.45459	0.725586	0.181763	0.489746	0.820312	0.923828	0.967773	0.270752	0.241333	0.45166	0.419434	0.353027	0.277832	0.4375	0.5	0.5	0.407959	0.358887	0.135864	0.153809	0.910156
ACH-000390						0.0087738	0.0087738	0				0						0				0.0731812					0.210571	0.993164		1															0	0		0.00294113
ACH-000391	0	1				0	0	0.00662231	0	0	0								0.21875	0.96875	1		0	1	1	0.00637054						1	1	1	1	1	1			0	0.00724792	0	0	0			1		0.498291
ACH-000392	0.592773	0.370361	0.0270233	0.89209	0.212769	0.305664	0.138916	0	1	0.941406	0.78125	0	0.0178528	0.0925903	0.0714111	0.0185242	0.0178528	0.0294189	0.29126	0.088623	0.177246	0.159668	0.868652	0.917969	0.938477	0.469482	0.959473	0.879883	0.833496	0.853516	0.724121	0.920898	0.976562	1	0.837402	0.305664	0.569336	0.944336	0.666504	0.959961	0.959961	0.799805	0.759766	1	0.970703	0.818359	0.198608	0.486328	1
ACH-000393	0.193604	0.112915	0.164429	0.0454407	0.0908813	0.0888672	0.0888672	0.29541	0.5	0.444336	0.5	0.292236	0.260986	0.391357	0.260986	0.282715	0.266602	0.146362	0.238647	0.25	0.28418	0.827637	0.933105	1	0.94873	0.769043	0.763184	0.74707	0.42627	0.535645	0.475342	0.448242	0.345459	0.600098	0.708984	0.300049	0.549805	0.476074	0.45459	0.411865	0.571289	0.51416	0.399902	0.344727	0.449951	0.281982	0.448242	0.464355	0.973145
ACH-000394	0.740234	0.526855	0.640625	0.865234	0.625	0.333252	0.370361	0.692383	0.964844	0.889648	0.842285	0.469727	0.401367	0.867676	0.42334	0.678711	0.437988	0.265869	0.592773	0.850586	0.859863	0.736816	0.940918	1	0.911133	0.975098	0.910645	0.846191	1	0.870605	0.894531	0.836914	1	0.987793	0.953125	0.871582	0.864746	0.95166	0.935547	1	0.955078	0.94043	0.970215	0.868652	0.605957	0.676758	0.547363	0.651855	0.911133
ACH-000396	0.00613403	0	0	0	0	0	0	0.0227203	0.514648	0.808594	0.514648	0	0	0.289551	0	0.951172	0.0243835		0.307129	0.114014	0.359619	0.941406	0.695312	0.736328	1	0.51123	0.780273	0.510742	0.991211	0.510742	0.660645	0.991699	0.989746	0.989746	1	0.496094	0.679199	1	1	1	1	1	0.933105	0.802734	1	0	0.144531	0.177002	0.812988
ACH-000397	0.516602	0.333252	0.1875	0.421875	0.25	0.0714111	0.0714111	0.133301	0.5	0.416748	0.600098	0.238037	0.463379	0.549805	0.414551	0.5	0.585449	0.208374	0.216675	0.186401	0.27124	0.102783	0.423096	0.761719	0.777832	0.649902	0.653809	0.616211	0.799805	0.623535	0.45459	0.830078	0.964844	0.911621	0.912109	0.21106	0.21106	0.317139	0.449951	0.605469	0.615234	0.475098	0.526367	0.75	0.739258	0.434814	0.287598	0.419922	0.96582
ACH-000398	0.657227	0.0285645	0.608887	0.608887	0.320068	0.833496	0.625	0.916504		0.651367		0.0422668	0.428467	0.67627	0.657227	0.657227	0.228516	0.0357056	0.833496	0.319336	0.152832	0.626465	0.137207	1	0.901855	0.764648	0.965332	0.864258	1	0.847656	0.170166	0.833496	0.868652	0.57373	0.983887	0.444336	0.844238	1	0.520996	0.933105	0.933105	0.933105	0.466553	0.916504	0.138916	0.055542	0.157837	0.544434	1
ACH-000399	0.818359	0.717285	0.928711	0.643066	0.689453	0.759277	0.351807	0.611328	0.788086	0.81543	0.696777	0.814941	0.640137	0.947754	0.625977	0.881836	0.695801	0.94873	0.967285	0.866699	0.803223	0.962402	0.815918	0.987305	0.912109	0.892578	0.930176	0.833496	0.815918	0.866699	0.907715	0.92627	0.88623	0.906738	0.90918	0.90625	0.953125	1	0.724121	0.774902	0.974121	0.975098	1	0.643066	0.935547	1	0.861328	0.935547	0.993652
ACH-000400	0.876953	0.136963	0.151855	0.25	0.367432	0.112671	0.0140839	0.535156	0.483887	0.851074	0.59375	0.245117	0.0416565	0.244629	0	0.0210571	0.0210571	0.0735474	0.0353088	0	0.129395	0.562988	0.266357	0.570801	0.82373	0.324951	0.577637	0.818359	0.898926	0.808105	0.831543	0.73877	0.979004	0.979004	0.947266	0.280518	0.338379	0.617676	0.617676	0.684082	0.684082	0.59668	0.456055	1	0.830566	0.779785	0.334473	0.71875	1
ACH-000401	0	0	0.00763321	0.00757599	0	0.0289917	0.0289917	0	0.0599976	0.351807	0.0196075	0	0	0	0	0	0	0	0.0138855	0.0138855	0.027771	0.443115	0	0.354492	0.529297	0.529297	0.242798	0.289551	0.0158691	0.201416	0.03125	0.197632	0.76709	0.972656	0.418945	0.177002	0.115051	0	0	0	0.315674	0.315674	0.315674	0.22583	0	0	0.653809	0.366699	0.685547
ACH-000402	1	0.761719	1	0.856934	0.620605	0.826172	0.478271	0.391357	0.922852	0.884766	0.922852	1	0.974121	1	0.974121	0.974121	0.974121	1	1	1	1	1	1	1	1	1	1	1	1	0.977539	0.315674	1	1	1	0.964355	0.901855	0.816895	1	1	0.959961	0.680176	0.959961	0.959961	0.978027	0.756836	0.216187	0.848145	1	1
ACH-000403	0.888672	0.388916	0.837891	0.811035	0.828613	0.5625	0	0.5	0.466553	0.428467	0.333252	0.015152	0.102539	0.579102	0.0512695	0.0769043	0.0256348	0	0.157837	0.157837	0.0933228	0.542969	0.572754	0.672852	0.973145	0.799805	0.838867	0.943359	0.856934	0.838867	0.799805	0.890625	0.990234	0.882324	0.911621	0.5	0.6875	0.75	0.666504	0.965332	0.965332	0.965332	1	0.888672	0.880859	0.604492	0.142822	0.94043	0.852539
ACH-000404	0.19043	0.0317383	0.449951	0.083313	0.472168	0.153809	0.153809	0	0.0588379	0.25	0.0882568	0	0.0285645	0.371338	0.0704346	0.126709	0.0140839	0	0.0952148	0.37085	0.241943	0.587402	0.795898	0.591797	0.868652	0.688477	0.53125	0.8125	0.434814	0.46875	0.333252	0.738281	0.735352	0.646973	0.314209	0.512695	0.769043	0.527832	0.222168	0.600098	1	0.199951	0.199951	0.323486	0.285645	0.476074	0.131836	0.158569	0.885254
ACH-000405	0.78125	0.375	0	0.666504	0.314697	0.75	0.5625	0.375	0.818359	0.600098	0.75	0.213623	0.54541	1	0.333252	0.522949	0.181763	0	0.791504	0.291748	1	0.714355	0.980957	0.980957			0.967773	1	0.846191	0.967773	0.692383	1	0.962891	1	0.888672	0.633301	0.933105			0.95459	1	1	1	1	1	1	0.727051	0.837402	0.966797
ACH-000406	0.411865	0.294189	0.0322571	0.258057	0.615234	0.5	0	0.157837				0.0476074	0.205078	1	0.538574	0.769043	0.974121	0.277832	0.792969	0.758789	1	1	0	1	1	1	0.90332	0.914062	1	0.914062	1	1	1	1	0.792969	0.702637	0.729492			0.941406	1	1	1				0.522949	0.75	1
ACH-000407	0	0	0	0.00746155	0.030304	0	0	0	0	0.132568	0.224976	0.00492477	0.0274048	0.0985718	0.0068512	0.0616455	0.0616455	0	0.06604	0.0471802	0.11322	0.181763	0.311768	0.63623	0.212524	0.0625	0.0718994	0.128052	0.164551	0.0487671	0.0375061	0.122437	0.146484	0.630371	0.302979	0.0238037	0.0238037	0.230713	0.0769043	0.0517273	0.137939	0.448242	0.137939	0.0908813	0.121643	0	0.0654297	0.169678	0.79248
ACH-000408	0.891113	0.464355	0.595703	0.766113	0.45459	0.51709	0.0689697	0.0344849	0.736816	0.968262	0.947266	0.508789	0.507324	0.898438	0.709961	0.927734	0.666504	0.392822	0.733398	0.777832	0.888672	0.617188	0.932129	0.991699	0.931152	0.885254	0.921875	0.924316	1	0.984863	0.964355	0.850098	0.98584	0.98584	0.943848	0.638184	0.861816	0.850098	0.799805	0.799805	0.820312	0.799805	0.725098	0.833496	0.950195	0.899902	0.794922	0.816895	0.963379
ACH-000409	0.186035	0.0697632	0.217407	0.328613	0.114258	0.272705	0	0	0.0384521	0.083313	0.0384521	0.182739	0	0.315674	0.0789185	0.236816	0.197388	0.121216	0.155151	0.120667	0.293213	0.363525	0.395752	0.575684	0.679199	0.567871	0.47998	0.831543	0.859863	0.801758	0.666504	0.826172	0.691895	0.794434	0.652832	0.495605	0.410156	0.487793	0.324951	0.780273	0.70752	0.463379	0	0.777832	0.285645	0.285645	0.178101	0.772949	0.677246
ACH-000410	0	0	0	0	0	0	0	0	0	0.0869751	0	0.0652466	0	0.027771	0	0	0	0	0	0	0	0	0.0243835	0.00813293	0.0149231	0.0895386	0.0198059	0.141479	0.0178528	0.00934601	0.0172424	0	0.53418	0.513672	0.373291	0.0135117	0.0434875	0	0.0238037	0	0.0200043	0	0	0	0.0566101	0.036377	0.00598907	0.00719452	0.0370483
ACH-000411	0.916504	0.0274048	0.0307617	0.399902	0.657227	0.0384521	0	0	0.856934	0.84082	0.856934	0.0888672	0.10907	0.403809	0.21814	0.277832	0.0908813	0	0.62793	0.606445	0.953125	0.74707	0.827148	1	0.939453	0.698242	0.891113	0.870605	0.807617	0.886719	0.192261	0.96875	0.755859	0.947266	0.868652	0.854492	0.535645	1	0.821289	0.541504	0.958496	0.791504	0.958496	1	0.886719	0.943359	0.375	0.522461	0.954102
ACH-000412	1	0.735352	0.47998	0.640137	0	0	0	0.5	0.0714111	0.25	0.51709	0	0.0172424	0.157837	0	0.0172424	0	0	0.0285645	0.0285645	0	0.538574	0.160034	0.560059	0.840332	0.191528	0.773438	0.981934	0.475098	0.363525	0.224976	0.816895	0.952148	1	0.56543	0.212158	0.0101013			0	0	0	0	0.360107	0.277832	0.833496	0.266113	0.285645	0.985352
ACH-000414	0.51123	0.20874	0.00847626	0.117676	0.193726	0.177368	0.0539246	0.074646	0.225464	0.333252	0.0388489	0.166626	0.126587	0.539551	0.105286	0.295654	0.12146	0	0.016861	0.0511475	0.180786	0.691406	0.569336	0.785156	0.747559	0.343506	0.626953	0.831543	0.707031	0.585938	0.535156	0.622559	0.855469	1	0.806641	0.569824	0.476562	0.947266	0.631348	0.30127	0.650391	0.79541	0.505859	0.323486	0.365479	0.394287	0.521973	0.463623	0.850586
ACH-000415	0.493652	0.0632935	0.0735474	0.179077	0.114746	0.0714111	0.0714111	0.107117	0.382324	0.425537	0.646973	0.0465088	0.0327759	0.0333252	0.0491943	0.0327759	0.0508423	0.0588379	0.212524	0.0124969	0.0126572	0.234375	0.0370483	0.3396	0.39209	0.427246	0.333252	0.442871	0.196777	0.294189	0	0.0722656	0.569336	0.584473	0.630859	0.0810547	0.0675659	0.770996	0.4375	0.030304	0.0298462	0.0757446	0.0908813	0.472168	0	0.0983887	0.09375	0.00806427	0.19873
ACH-000416	0.138428	0.00769043	0.315674	0.155884	0.230713	0	0.0454407	0.142822	0.416748	0.458252	0.416748	0.0181885	0	0.716309	0.353027	0.253662	0.294189	0.368408	0.0744019	0.0666504	0.19165	0.844238	0.923828	0.961914	0.958008	0.646973	0.904785	0.855469	0.875	0.578125	0.791504	0.342773	0.610352	0.974121	0.698242	0.430664	0.31543	0.346191	0.461426	0.408447	0.485596	0.671387	0.0999756	0.549805	0.847656	0.327637	0.348145	0.3479	0.745605
ACH-000417	0.96875	0.129028	0.0434875	0.708496	0	0.222168	0	0	0.916504	0.608887	0.916504	0.0317383	0	0.0370483	0	0	0.0357056	0	0	0.0294189	0.0588379	0.546875	0.493652	0.887695	1	0.553223	0.976074	0.976074	0.919922	0.880859	0.360107	1	0.977539	0.955566	0.911133	0.5625	0.479248	0.842285	0.684082	0.353027	0.588379	0.764648	0.3125	0.470703	0.799805	0.842285	0.146606	0.0337219	0.654785
ACH-000418	0.534668	0.0930176	0.0256348	0.0512695	0.0869751	0.0333252	0	0	0.268311	0.0588379	0.146362	0.0714111	0.107117	0.285645	0.0714111	0.0714111	0		0.227295	0.272705	0.333252	0.257568	0.358643	0.393555	0.584961	0.592773	0.475098	0.625	0.199951	0.549805	0.333252	0.280762	0.67334	0.714355	0.734863	0.473633	0.5	0.17395	0.17395	0.307617	0.321533	0.321533	0.296387	0.470703	0.3479	0.3479	0.385986	0.0895386	0.371338
ACH-000419	0.5	0.5	0.604004	0.916504	0.964355	0.84375	0.84375	0.90625	0.133301	0.785645	0.133301	0.777832	0.568848	0.980469	0.980469	1	0.980469	0	1	1	0.75	1	0.166626	0.976074	1	0.600098	0.884766	1	0.727051	1	0.54541	0.833496	1	1	1	1	1	1	1	0.358887	0.769043	0.358887	0.358887	1	1	0.615234	0.698242	0.71875	1
ACH-000420	0.967285	0.737793	0.710449	0.710449	0.695801	0.875	0.875	0.25	1	0.600098	1	0.965332	0.5	0.856934	0.785645	0.928711	0.928711	0.950195	0.63916	0.816895	0.983398	0.829102	0.953125	1	0.965332	0.896484	0.929688	0.929688	0.98291	0.95752	1	0.975586	1	0.950195	1	0.820312	0.936035	0.976562	0.953613	1	1	0.962891	0.962891	1	0.902344	0.926758	0.507812	0.921875	0.992676
ACH-000421	0.844238	0.522949	0.879883	1	1				0.928711	1	1	0.0147095	0	0.0400085	0	0	0	0.0526428	0.0163879	0.196777	0.376953	0.950684	0.885254	0.983398	0.983398	0.950195	1	0.838867	0.984863	0.967773	0.970215	0.899902	0.919922	1	0.901855	0.959961	0.973633	1	0.646973	0.462891	1	0.944336	0.722168	0.696289	0.925781	0.888672	0.952148	0.902832	0.979004
ACH-000422	0.646973	0	0	0	0	0	0	0		0.25		0.37793	0.470703	0.764648	0.775879	0.775879	0.462646	0.125	0	0.543945	0.543945	0.956543	0.681641	0.90918	1	1	0.54541	1	0.54541	0.84375	1	0.435547	0.965332	1	0.481445	0.820801	0.783203	0.555664	0.577148	0.604492	0.62793	0.62793	0.62793	0.959961	0	0	0.568359	0.555664	0.694824
ACH-000423	0.893066	0.643066	0.571289	0.51416	0.696777	0.646973	0.470703	0.353027	0.666504	0.714355	0.416748	0.441162	0.216187	0.918945	0.621582	0.811035	0.756836	0.357178	0.333252	0.833496	0.866699	0.918945	0.807617	0.886719	1	0.941406	0.943359	0.943359	0.916504	0.962402	0.875	0.973145	1	0.98291	0.98291	0.890625	0.828125	0.111084	0.666504	0.95459	0.826172	0.956543	0.826172	0.80957	0.888672	0.777832	0.237305	0.880371	0.939941
ACH-000424	0.70166	0.894531	0.6875	0.989746	0	0.276611	0.0425415	0.108704	0.9375	0.850098	0.969727	0.947266	0.777832	0.98584	0.791504	0.868164	0.736328	0.717285	0.898926	0.844238	0.973633	0.875977	0.991211	0.991211	0.961914	0.734375	0.901367	1	0.955566	0.914551	0.933105	0.813965	1	1	0.70752	0.974121	0.974121			1	1	0.725098	0.700195	1	0.488281	0.604492	0.453613	0.350098	0.976562
ACH-000425	0.3125	0.375			0.388916	0.142822	0	0.0476074		0.466553		0.107117	0.300049	0.600098	0.0999756	0.350098	0.150024	0	0.282715	0.282715	0.3479	0.938965	0.75	0.850098	1	1	0.879883	0.600098	1	0.560059	0.5	0.739258	0.944336	0.947266	1	0	0.461426			0.523926	0.714355	0.856934	0.523926	0.600098	0.411865	0.470703	0.509766	0.660645	0.982422
ACH-000427	0.978516	0.395752	0.64502	0.71875	0.764648	0.666504	0	0.307617	0.882324	0.87207	0.882324	0.0511475	0	0.586426	0.0322571	0.22583	0.129028	0.133301	0.285645	0.512695	0.769043	0.938965	0.901855	0.960938	0.944336	0.888672	0.947266	0.178589	1	0.947266	1	1	1	0.935547	0.967773	0.351318	0.635254	0.25	0.666504	0.919922	1	0.875	0.360107	0.833496	0.846191	0.973633	0.532715	0.393066	0.967773
ACH-000428	0.826172	0.227295	0	0.0526428	0.972168	0	0	0.714355	1	0.856934	0.976562	0	0	0.0588379	0	0	0.0588379	0	1	1	1	0.6875	0	0	0.922852	0	0.353027	1		0.980957						0	0.413818								0	0.871094	0.510254		0.980957
ACH-000429	0.938477	0.185181	0.622559	0.847168	0.560059	0	0.305664	0.333252	0.90918	0.977051	1	0.436523	0.074646	0.869629	0.242798	0.637695	0.0285645	0.780273	0.557617	0.788574	1	0.811035	0.692871	0.976074	1	0.964844	0.984863	0.90918	1	0.984863	0.837402	0.846191	0.884277	0.925293	0.944824	0.837891	0.942871	0.979004	0.9375	1	0.856934	0.941406	0.799805	0.864746	0.458252	0.708496	0.663086	0.93457	0.955566
ACH-000430	1	0.692383	0.689453	0.620605	0.421143	0.481445	0.333252	0.555664	0.485352	1	0.735352	0.217407	0.580566	0.600098	0.580566	1	0.967773	0.766602	0.423096	0.5	0.5	0.888672	0.939941	0.856934	1	0.928711	0.924316	0.925781	0.952148	0.888672	0.833496	0.774902	0.976562	1	1	0.348389	0.424316	0.82373	0.54541	1	1	1	1	1			0.525391	0.465088	1
ACH-000431										1		1													1	1	1	1	0.948242	1	0									1	1	1	1				1
ACH-000432	0.969727	0.911621	0.962891	1	1	0.666504	0.777832	0.866699	1	0.958496	0.866699	0.973633	0.979492	0.979492	0.979492	0.958984	0.978516	0.922852	1	0.891113	0.782715	0.799805	0.976562	1	0.972168	0.972168	1	1	1	1	1	1	0.98291	1	0.950195	0.983398	1	0.928711	0.928711	0.979004	0.899902	1	1	1	0.944336	0.972168	0.883301	0.983887	0.929199
ACH-000433	0.631348	0.789551	0.384521	0.384521	0.566406	0.413818	0.0689697	0	0.549805	0.0999756	0.549805	0.115356	0	0.172363	0	0.275879	0	0.600098	0.0370483	0	0.0370483	1	0.757812	0.81543	1	0.688965	0.862305	0.932617	0.806152	0.797852	0.520508	1	1	1	0.804688	0.535645	1			1	1	0.791504	1	1	0.0588379	0.353027	0.294922	0.73291	1
ACH-000434	0.516113	0.0396729	0.004879	0.400879	0.109619	0.117676	0.117676	0.283447	0.5	0.467773	0.512695	0.0847168	0.557617	0.663086	0.551758	0.601074	0.628418	0.0133362	0.235107	0.0912476	0.0719604	0.0849609	0.0362549	0.429932	0.985352	0.147095	0.933105	0.853516	0.992676	0.918457	0.788086	0.376953	0.986816	0.993164	0.947754	0.12085	0.20874	0.303711	0.307617	0.0725708	0.301514	0.28125	0.204712	1	0.986816	0.933105	0.188599	0.868652	1
ACH-000435	0.882324	0.617676	0.51709	0.862305	0.548828				1	0.785645	0.882324	0.950684	0.54541	0.605957	0.515137	0.484863	0.575684	0.588379	0.521973	0.608887	0.869629	0.9375	0.952148	1	1	0.947266	1	0.956543	0.950195	0.956543	0.950195	1	0.862305	0.966797	1	0.788086	0.818359	0.941406	0.941406					1	0.922852	1	0.947266	0.90625	0.972168
ACH-000437	0.0980225	0	0	0	0.0999756	0	0	0.0384521	0.111084	0.210571	0.333252	0.563965	0.166626	0.5	0.25	0.25	0.027771	0	0.3479	0.326172	0.333252	0.3125	0.309082	0.518066	0.90918	0.424316	0.856934	0.80957	0.406738	0.80957	0.344238	0.392822	0.977051	0.84082	0.869629	0.21814	0.199951	0.199951	0.285645	0.0999756	0.0999756	0.0999756	0.0999756	0.5	0.476074	0.476074	0.419434	0.219238	0.844238
ACH-000438						0	0	0		0.63623		0							0	0.994629	0.994629												1	0.993164	0.953125			1	0.994629								0	0.454102
ACH-000439	0.833496	0.666504	0.25	0.928711		0.25	0.375	1	1		0.894531	0.92627	0.901855	0.983398	0.868652	0.852539	0.753906		0.925781	0.852051	0.555664	0.980957	0.714355	0.856934	0.799805	0.350098	1	0.911621	1	1	0.924316	0.964355	1	1	0.931152	0.315674	0.263184	1	0.922852						0.128174	0.846191	0.891113	0.898438	0.799805
ACH-000440	1	0.888672				0.928711	0.856934	0.928711		0.799805		0.75	0.888672	1	1	1	0.888672		0.842285	0.894531	0.947266	1	0.928711	0.964355	1	0.983887	0.920898	1		1		0.950195	0.944336	1	0.947266	0.700195	1	1	1	1	1	1	1	1	1	1	0.799805	1	1
ACH-000441	0.0416565	0	0	0.0999756	0.270264	0.0666504	0	0	0.285645	0.212158	0.142822	0	0.09375	0.483887	0.15625	0.4375	0.34375	0	0.384521	0.615234	0.769043	0.839844	0.296387	0.852051	0.860352	0.279053	0.631348	0.947266	0.964355	0.894531	0.785645	0.842285	1	1	0.899902	0.25	0.799805			1	0.799805	0.666504	0.933105	0.722168	0.142822	0.5	0.655273	0.602539	1
ACH-000443	1	0.235352	0.726074	0.958984	0.259277	0.94873	0.871582	0.563965	0.919922	0.774902	0.919922	0.0559998	0.646484	0.901367	0.890137	0.768066	0.451172	0.43335	0.474365	0.740234	0.818359	0.647949	0.803711	0.901855	0.951172	0.683105	0.952148	0.939941	0.981934	0.927734	1	0.968262	1	0.989258	0.892578	0.833496	0.90332	0.222168	1	1	1	1	0.958496	0.739258	0.756836	0.675781	0.774902	0.884277	0.974121
ACH-000444	0.988281	0.297607	0.215942	0.312012	0	0.0357056	0.0701904	0.363525	0.600098	0.677246	0.680176	0.389648	0.419922	0.899902	0.439941	0.640137	0.439941	0.263184	0.476562	0.317871	0.481445	0.907715	0.635254	0.946777	0.959473	0.374023	0.984375	1	0.931641	1	0.597168	0.930664	0.895508	0.906738	0.954102	0.506348	0.379639	0.938965	0.877441	0.888672	0.888672	0.730957	0.666504	0.904785	0.907715	0.507812	0.0273285	0.853027	0.909668
ACH-000445	0.0720825	0.0178528	0	0	0	0.0117645	0	0.383789	0.237061	0.224731	0.226807	0.0817261	0.141846	0.695801	0.510254	0.695801	0.567383	0	0.413818	0.400879	0.363281	0.432373	0.346436	0.889648	0.578125	0.367432	0.586426	0.793457	0.496826	0.478516	0.155273	0.585449	0.605469	0.934082	0.881348	0.234497	0.297852	0.333252	0.258057	0.61377	0.541016	0.306152	0.408203	0.327148	0.388916	0.231445	0.135498	0.363281	0.583984
ACH-000446	0.945312	0.245605	0.307617	0.629395	0.338379	0.241333	0.0357056	0.357178	0.588379	0.536621	0.605957	0.313965	0.269287	0.743652	0.307617	0.577148	0.435791	0	0.523926	0.571289	0.952148	0.4375	0.653809	0.936523	0.791992	0.720215	0.983887	1	0.797363	1	0.919922	0.90625	0.984375	0.953613	0.984375	0.757324	0.795898	0.75	1	0.285645	0.842285	0.614258	0.771973	0.285645	0.89209	0.631348	0.311523	0.63623	0.947754
ACH-000447	0.785645	0.121948	0.652344	0.74707	0.0175476	0.333252	0.611328	0.388916	0.771484	0.774414	0.777832	0.290039	0.523438	1	0.848633	0.717773	0.569824	0.171021	0.693359	0.406738	0.43335	0.737305	0.92627	0.944336	1	0.90918	1	0.876465	0.986816	0.895996	0.569824	1	0.911621	0.96875	0.841309	0.674805	0.762695	0.859863	0.97998	1	1	0.976562	0.860352	0.730957	0.911621	0.899902	0.627441	0.541992	0.923828
ACH-000448					0					0									0	0	0																	0	0								0	0
ACH-000449	0.875	0.25	0.666504	1	0.486572	0.571289	0.666504	0.714355	0.772949	0.680176	0.63623	0.950195	0.638672	0.986328	0.75	0.845215	0.722168	0.666504	0.666504	0.625	0.695801	0.915039	0.964355	0.928711	1	0.774414	0.847656	1	0.950195	0.966797	0.700195	0.973145	0.958984	0.917969	0.958984	1	0.95166	1	0.791504	1	1	1	0.916504	1	0.894531	0.842285	0.652832	0.873047	1
ACH-000450	0.196411	0.107117	0.0144958	0.0144958	0.391357	0	0	0.0256348	0.0714111	0.129028	0	0	0	0.318115	0.152222	0.17395	0.0217438	0.0172424	0	0	0.0596924	0.210571	0.717773	1	0.849121	0.1698	0.716797	0.678711	0.692383	0.678711	0.115356	0.210571	0.419434	1	0.32251	0.277832	0.0925903	0.055542	0.055542	0.0512695	0.0512695	0.432373	0.410156	0.620605	0.394775	0.289551	0.291748	0.108887	0.879395
ACH-000451	0.34082	0.84082	0	0.571289	0	0	0	0		0.871094		0	0.0454407	0.790527	0.727051	0.75	0.727051	0.913086	0.666504	1	1	0.415039	1	1	1	1	0.776367	0.759277		0.873535		1	0.558105	1	0.90918		0.125			0	1	1	1	1			0.856934	0.269775	1
ACH-000452	0.963867	0.472656	1	1	0.624512	0.56543	0	0.574707	0.98877	0.761719	0.799805		0.155884	1	0.844238	0.986816	0.129883	0	0.868164	0.980957	0.868164	0.976562	0.885742	1	1	1	0.950195	0.950195	0.966309	0.950195	0.965332	0.993164	0.993652	0.993652	0.981934	0.983887	0.983887	1	0.950195	0.391357	0.985352	1	0.985352	1	1	1	0.696777	0.729004	1
ACH-000453	0.947266	0.300049	0.774414	0.871094	0.175049	0	0.333252	0.333252	0	0.210571	0.0625	0.971191	0.987305	0.975098	0.961914	0.974609	0.961914	0.566895	0.913086	0.955566	0.956543	1	0.992676	0.992676	0.952148	0.952148	0.98291	0.966797	0.958496	0.950195	0.538574	0.894531	0.966309	0.830566	1	1	0.975586			1	0.981445	0.944336	0.981445	1	0.928711	1	0.32666	0.951172	1
ACH-000454	0.442871	0.0714111	0.399902	0.506348	0.358887	0.164673	0.129395	0.228882	0.633301	0.623535	0.766602	0.12793	0.202881	0.793945	0.230225	0.630371	0.410156	0	0.466064	0.361328	0.386475	0.687012	0.545898	0.687988	0.744629	0.577637	0.852051	0.935547	0.740234	0.733887	0.660156	0.744629	0.907227	1	0.939941	0.460938	0.808594	0.846191	0.52002	0.941406	1	0.588379	1	0.615234	0.565918	0.3396	0.357422	0.600098	0.907715
ACH-000456	0.0289917	0.0144958	0	0.0144958	0.0188751	0	0	0	0.0769043	0.0625	0.0769043	0	0.0217438	0	0	0	0.0222168	0	0	0	0	0.339355	0	0	0.274902	0.350098	0.208374	0.0625	0.138916	0.0740967	0.114258	0	0.280029	0.340088	0.540039	0	0.0769043	0	0	0	0	0	0	0	0.127319	0.0925903	0.0908813	0.0325317	0.319336
ACH-000457	0.625	0.378906	0.506348	0.779297	0.266602	0.300049	0.444336		0.63623	0.845215	0.75	0.0777588	0.0307617	0.453125	0.279297	0.158691	0.176514	0.0908813	0.492188	0.37793	0.713379	0.595215	0.734375	0.891602	0.964355	0.605469	0.905273	0.958984	0.865234	0.958984	0.980469	0.852051	0.936035	0.943848	0.976074	0.198364	0.258301	0.484863	0.4375	0.523926	0.944336	1	0.476074	0.375	0.897461	0.615234	0.461914	0.736328	0.95752
ACH-000458	0.10144	0.0144958	0	0.1875	0.0908813	0.0434875	0.130493	0.0434875	0.384521	0.4375	0.153809	0.0625	0.125	0.375	0.104187	0.395752	0.291748	0.136353	0.153809	0.184204	0.289551	0.233276	0.291016	0.377441	0.519531	0.592285	0.603516	0.683105	0.450439	0.716797	0.439453	0.673828	0.849609	0.978516	0.90332	0.473633	0.407959	0.47998	0.5	0.59375	0.5625	0.71875	0.53125	0.617188	0.344727	0.344727	0.381836	0.203125	0.894531
ACH-000459	0.0606079	0.030304	0.151001	0.302002	0.0755005	0	0	0	0.055542	0.764648	0.388916	0.452393	0.521973	0.652344	0.434814	0.17395	0.304443	0	0.684082	0.421143	0.920898	0.600098	0.683105	0.975586	1	0.444336	0.827637	1	0.720215	0.862305	0.959961	1	0.928711	1	0.571289	0.205933	0.0294189			1	1	1	1		1	1	0.383057	0.469238	0.881348
ACH-000460			0	0	0	0	0	0	0.0263214		0.0526428	0	0	0	0	0	0		0	0	0.419434	0.959961	0	0	1	0.9375	0.0344849	0.0333252	0.0425415	0.483887	0.0425415	0.0068512	0.615234	0.980957	0	1	0.055542			0.0263214	0.0263214	0.0263214	0		0	0.0454407	0.259277	0	1
ACH-000461	0.982422	0.385986	0.793457	0.856934		0	0	0.444336		0.853516		0.113953	0	0.164185	0	0.0149231	0	0	0.22644	0.151001	0.679199	0.75	0.794434	0.972168	0.906738	0.813965	1	1	1	1	1	1	0.974121	0.974121	0.975098	0.641602	0.769043	0.520996	0.583496	1	0.826172	0.727051	0.826172	0.714355	1	1	0.747559	0.29541	1
ACH-000462	1	1	1	1	0.888672				1		1	0.789551	0.680176	0.919922	0.919922	0.919922	0.919922		1	0.799805	1	0.977051	1	1	0.965332	0.931152	0.958496	1	1	0.958496	0.877441	0.985352	1	1	1	0.976562	0.976562	0.899902	0.899902	1	1	1	1	0.899902	1	1	1	0.939941	0.959961
ACH-000463	0.533203	0	0.055542	0.0856934	0.408203	0.114258	0.0856934	0.485596	0.511719	0.5	0.581543	0.888672	0.107117	0.714355	0.357178	0.428467	0.321533	0.300049	0.586914	0.434814	0.466553	0.566895	0.80957	0.971191	0.888672	0.844238	0.884766	0.987305	1	0.936523	0.808594	0.821289	0.978516	1	0.905273	0.743652	0.791992	0.899902	0.600098	0.472656	0.963867	0.963867	0.854492	0.846191	0.827637	0.931152	0.396973	0.664551	1
ACH-000464	0.411865	0.235352	0.164917	0.343506	0.0847168	0	0.0740967	0.119995	0.0869751	0.351318	0.130493	0.378906	0.0510254	0.221069	0.040802	0.122437	0.081604	0.203735	0.25	0.0367737	0.0808716	0.418701	0.459717	0.693359	0.623047	0.590332	0.709961	0.77002	0.869629	0.820312	0.487061	0.654785	0.706543	0.884277	0.617676	0.137939	0.137939	0.666504	0.59668	0.4729	0.554199	0.657715	0.739746	0.702148	0.350098	0.278564	0.509766	0.201904	0.907227
ACH-000465	0.426025	0.259277	0.107117	0.214233	0.216187	0	0.0588379	0	0.473633	0.342041	0.421143	0.594727	0.0892944	0.321533	0.160767	0.163696	0.178589	0	0.360352	0.418701	0.511719	0.44165	0.320068	0.280029	0.89209	0.405518	0.0952148	0.434814	0.86377	0.260986	0.434814	0.160034	0.717773	0.922852	0.743652	0.235352	0.176514	0.5	0.291748	0.375	0.3125	0.3125	0.25	0.655273	0.540527	0.405518	0.133301	0.415039	0.974121
ACH-000466	0.115356	0	0.43335	0.399902	0					0.217407		0	0	0.0350952	0	0	0.033905	0.03125	0.125	0.0208282	0.0208282	0.431152	0.363525	0.522949	0.486572	0.648438	0.600098	0.529297	0.846191	0.294189	0.538574	0.538574	0.888672	1	1	0.411865	0.509766	0.5	0.45459	0.5	0.5	0.399902	0.5	0.846191	1	0.45459	0.344727	0.304932	1
ACH-000467			0.63623	1	0.9375				0.90918	0.953613	0.833496	0.114258	0	0.300049	0.150024	0.0499878	0.0499878	0.136353	0.0377502	0.0188751	0.188721	0.675781	0.833496	1	1	1	0.951172	1	1	0.975586	1	1	1	1	0.979492	0.685547	1	0.95459	0.681641						0.799805	0.950195	0.936035	1	1
ACH-000468	0.666504	0.0877075	0.102051	0.224487	0.218384	0.278076	0.375977	0.63916	0.63623	0.568359	0.654785	0.0671387	0.416748	0.680664	0.5	0.535156	0.402832	0.0208282	0.368408	0.280762	0.543945	0.780273	0.685547	0.927734	0.991699	0.541016	0.757812	0.989746	1	0.979492	0.967773	0.80957	0.969727	0.769043	0.773438	0.392822	0.571289	0.979004	0.625	0.919922	0.879883	0.839844	0.577148	0.875	0.849121	0.615234	0.209717	0.841309	1
ACH-000469	0	0	0.125	0.575684	0	0	0	0.0999756	0	0.5	0.166626	0.146606	0.199951	0.166626	0.130493	0.0217438	0.521973	0	0.0517273	0.0357056	0.0357056	0.40332	0.533203	0.641113	0.306641	0.34668	0.118652	0.117676	0.177368	0.132324	0.0161285	0.341797	0.357178	0.660645	0.913574	0.0545349	0.232178	0.666504	0.727051	0.764648	0.588379	0.411865	0.764648	0.560059	0.856934	0.476074	0.130005	0.486816	0.966797
ACH-000470	0.971191	0.942871	0.884766	1	0.837402	1	1	1	0.952148	0.888672	1	0.0088501	0.0140839	0.0140839	0.0140839	0.0140839	0.0140839	0	0	0.0158691	0.0317383	0.959473	0.898438	0.758789	1	0.980957	0.833496	1	1	1	1	0.907227	0.973633	0.934082	0.934082	0.972656	0.958984	0.526367	0.473633	1	1	1	0.842285	1	0.897461	0.897461	0.980957	0.929199	0.989746
ACH-000471	0.0526428	0	0	0.014595	0	0	0.027771	0	0.09375	0.196777	0.0999756	0.0400085	0.0900879	0.10907	0.0625	0.0357056	0.0270233	0	0.0680542	0.0482788	0.0827637	0.0526428	0.151489	0.253662	0.513672	0.162109	0.297363	0.263184	0.263184	0.236816	0.351074	0.27832	0.709961	0.971191	0.943848	0.109619	0.0274048	0.108093	0	0.0322571	0.333252	0.111084	0.135132	0.175049	0.532227	0.506348	0.230469	0.0964355	0.833496
ACH-000472	0.278076	0.0370483	0.181763	0.350098	0.0606079	0.020401	0.0208282	0.125	0.241333	0.457031	0.300049	0.123474	0.442871	0.793945	0.436523	0.600098	0.436523	0.115356	0.271484	0.259033	0.271484	0.424805	0.315674	0.525879	0.464355	0.178589	0.75	0.914062	0.610352	0.84082	0.272705	0.704102	0.480469	0.94043	0.970703	0.272705	0.173584	0.435791	0.315674	0.868652	0.736816	0.868652	0.605469	1	0.652344	0.399902	0.32251	0.285645	0.944824
ACH-000473	0	0	0	0	0	0	0	0		0.579102		0	0.0285645	0.0285645	0.0285645	0.0571289	0	0.0999756	0.5	0.21875	1	0.25708	0.0666504	1	0.656738	0.387939	0.977051	0.555664	0.215332	0.54541	0.215332	1	1	1	1	0.555664	0.535645	0.138916	0.138916					0.0192261	0.806641	0.774414	0.0908813	0.083313	0.719727
ACH-000475	0.0104141	0	0	0.0135117	0	0.0294189	0.030304	0.030304	0.363525	0.317139	0.0908813	0	0	0.214233	0	0.0222168	0	0	0	0.0375061	0.0499878	0.197021	0.268555	0.287109	0.549805	0.429932	0.264404	0.25	0.333252	0.271729	0.199951	0.267578	0.629883	0.640137	0.616211	0.29126	0.278564	0.199951	0.214233	0.51709	0.413818	0.586426	0.379395	0.611328	0.703613	0.777832	0.164062	0.171997	0.85791
ACH-000476	0.0454407	0	0.25	0.125	0.0476074	0.0344849	0.0344849	0	0.285645	0.65625	0.272705	0.230713	0	0.555664	0.0185242	0.277832	0.129639	0.438965	0.430176	0.453369	0.883789	0.550781	0.217407	0.217407	1	1	0.425049	0.386475	0.561035	0.386475	0.561035	0.90918	0.97998	0.680176	0.680176	0.404297	0.383057	0.055542	0.111084	0.0416565	0.0416565	0.0416565	0.0416565	0.530762	0.285645	0.285645	0.4375	0.0322571	0.949219
ACH-000477	0.027771	0.027771	0.157837	0.150024	0.0499878	0.0357056	0	0	0	0.0285645	0.030304	0.0606079	0.170776	0	0.170776	0.170776	0	0	0.0169525	0.0169525	0.0847168	0.5	0.055542	0.166626	0.166626	0.125	0.13208	0.603516		0.206909		0.833496	0.416748	0.888672	0.361084	0.0175476	0.0178528	0	0					0.103455	0.428467	0.333252	0.0999756	0.285645	0.367432
ACH-000478	0.242798	0.0142822	0.0335999	0.0252075	0.0499878	0.0333252	0.133301	0.118652	0.0666504	0.15625	0.133301	0.0593262	0.0140839	0.0294189	0.0142822	0.0441284	0.140869	0.0370483	0.0208282	0.107544	0.0214996	0.207153	0.0434875	0.222168	0.20166	0.0403137	0.209961	0.126221	0.291748	0.235352	0.145874	0.0535583	0.943359	0.990723	0.981445	0.015625	0.164062	0	0.0384521	0.25	0.19043	0.142822	0	0.270752	0.163452	0.0865479	0.164307	0.0523682	0.700195
ACH-000479	0.925781	0	0.192993	0.403564	0.0263214	0.0192261	0.0769043	0.0192261	0	0.227295	0	0.811035	0.263184	0.526367	0.157837	0.894531	0.333252		0.121948	0.0731812	0.0487671	0.854004	0.510254	0.652832	0.691406	0.623047	0.5	0.363525	0.177368	0.296387	0.0491943	0.600098	0.779785	0.626953	0.783203	0.145142	0.118652	0.47998	0.375	0.296387	0.185181	0.222168	0.148193	0.828613	0.208374	0.208374	0.51123	0.479492	0.537598
ACH-000480	0.813477	0.0847168	0.378418	0.351318		0.416748	0.583496	0.583496		0.542969		0.317383	0.54834	0.580566	0.580566	0.54834	0.483887	0.56543	0.582031	0.490967	0.563477	0.62793	0.558594	0.856934	1	0.696777	0.465088	0.62207	0.600098	0.666504	0.526367	0.625	0.872559	0.891113	0.363525	0.350098	0.375	0.811035	0.567383	0.428467	0.428467	0.449951	0.380859	0.695801	0.5	0.5	0.481934	0.818359	0.579102
ACH-000481	0	0	0	0	0	0.0285645	0.027771	0.027771	0.434814		0		0.0625	0.53125	0	0	0		0.412354	0.192993	0.0087738	1			0.409912	0.327881			0.153809		0	0	0.792969	0.689453	0	0.423096	0.423096			0	0	0	0				0	0.755371	1
ACH-000482	0.729492	0.189209	0.666504	0.111084	0	0.0810547	0.108093	0.205444	0.674805	0.1875	0.600098	0.069458	0.0678101	0.551758	0.0678101	0.241333	0.0847168	0	0.027771	0.171387	0	0.5625	0.265381	1	0.912598	0.643066	0.649902	0.766602	0.614746	0.721191	0.635254	0.487793	0.888672	0.916504	0.808105	0.67041	0.406982	0.411865	0.399902	0.536133	0.492676	0.264648	0.3479	0.625	0.315674	0.157837	0.670898	0.180542	0.975098
ACH-000483	0.59082	0.0908813	0.518555	0.814941	0.788086	0.666504	0.466553	0.448242	0.720215	0.759766	0.839844	0.600098	0.353027	0.853027	0.529297	0.941406	0.294189	0.8125	0.789551	0.876953	0.876953	0.953613	0.692383	0.922852	0.967285	0.841309	0.791504	0.916504	0.827637	0.916504	0.879395	0.924805	0.948242	0.98291	0.931152	0.725586	0.819824	1	0.703613	1	0.974121	0.922852	0.692383	0.789551	0.882324	0.706055	0.650879	0.849609	0.918457
ACH-000484	0.911621	0.0882568	0.122192	0.139771	0.600098	0.105286	0	0.25	0.222168	0.542969	0.0588379	0.0620117	0.568359	0.977051	0.272705	0.643066	0.386475	0.148926	0.958984	0.986328	0.973145	0.612305	0.886719	0.962402	1	0.478271	0.973145	0.973633	0.967773	0.947266	0.978516	0.897949	0.949219	0.906738	0.98291	0.900879	0.881348	0.600098	0.714355	0.882324	0.470703	0.735352	0.706055	0.924316	0.879883	0.219971	0.338135	0.372803	0.955078
ACH-000485	0.922852	0.307617	0.178589	0.571289	0.0588379	0.113647	0.0908813	0.136353	0.382324	0.722168	0.735352	0	0	0.0243835	0	0	0	0	0.0208282	0.0208282	0.0243835	0.333252	0.459473	0.947266	0.703613	0.370361	0.84375	0.922852	0.815918	0.89209	0.184204	0.839844	0.956543	0.977539	0.822266	0.0400085	0.180054	0.846191	0.846191	0.625		0.25	0.25	0.666504	0.45459	0.5	0.154907	0.241333	0.885742
ACH-000486									0	0.555664	0.991699	0.0333252	0.920898	0.920898	0	0.920898	0		1	1	1	1			1	0						1	0.995605	1	0.995605					0.0181885	0.0183411	0	0				0	0.452393	0.773438
ACH-000487	0.0769043	0	0.196045	0	0	0	0	0.027771		0.478027		0.129028	0	0.0645142	0	0.166626	0.0333252	0	0.775391	0.468018	0.766113	0.485352	0.219727	0.242065	0.510742	0.445557	0.399902	0.431396	0.307617	0.490479	0.169434	0.344727	0.6875	0.958496	0.625	0.196045	0.372559	0.346191	0.208374	1	0.799805	0.40918	0.391357	0.111084	0.17395	0.199951	0.296387	0.265625	0.88623
ACH-000488	0.0722656	0.0843506	0.0490112	0.165039	0.192261	0	0	0.199951	0.199951	0.235352	0	0.0733643	0.0602417	0.505859	0.0722656	0.160522	0.108459	0.0232544	0.0128174	0.168823	0.168823	0.444336	0.453857	0.746582	0.575684	0.444336	0.516602	0.574707	0.433105	0.510742	0.13269	0.538574	0.953613	0.961426	0.882812	0.302002	0.348877	0.1875	0.09375	0.586426	0.432373	0.280029	0.253418	0.527832	0.25415	0.305176	0.130493	0.235596	0.923828
ACH-000489	1	0	0.915039	0.510742	1	0.8125	0.21875	1	0.938965	0.883301	0.9375	0	0.208984	0	0	0	0	0	0.0105286	0	0	0.976562	0.666504	1	0.90918	0.788086	0.932617	1	1	0.966797	1	1	1	1	0.962891	1	0.450928	1	0.537109	1	0.558594	1	0.735352	0.952148	1	1	0.267334	0.337646	1
ACH-000491	0.669922	0.280029	0.123291	0.479492	0.648926	0.579102	0.421143	0.222168	0.40918	0.560059	0.52002	0.521484	0.0666504	0.606934	0	0.379395	0.300049	0.055542	0.171631	0.229614	0.300781	0.473633	0.202515	0.703613	0.782715	0.276611	0.686035	0.655762	0.674316	0.541016	0.30957	0.875	0.966309	0.98291	0.847656	0.255859	0.488281	0.577148	0.759766					0.740723	0.514648	0.646973	0.177612	0.162598	0.988281
ACH-000493	0.300049	0.1875	0	0.194946	0.264648	0.203369	0	0.0169525	0.882324	0.727051	0.757812	0.12085	0.40625	0.419434	0.25	0.25	0.25	0.45459	0.450684	0.441162	0.0147095	0.464844	0.344482	1	1	0.990234	0.808594	0.9375	0.51709	0.614746	1	1	0.973633	1	0.918945	1	0.661133	0.508789	0.175415					0	0.689453	0.473633	0.458252	0.504883	1
ACH-000495	0.0684814	0.4729	0.536133	0.540039	0.178589	0.1875	0.25	0.4375	0.588379	0.8125	0.722168	0.0637207	0.346436	0.856934	0.467529	0.733887	0.233765	0.457031	0.519043	0.827148	0.961426	0.989258	0.927734	0.975586	0.971191	0.945801	0.942871	0.878906	0.928711	0.969727	1	0.970703	0.919434	0.741699	0.904785	0.926758	0.975586	1	1	1	1	1	0.620605	1	0.723145	0.538574	0.660156	0.75293	0.931641
ACH-000496	0.348389	0.0337219	0.0476074	0.00952148	0.0416565	0	0	0.19043	0.0416565	0.0526428	0.125	0.0872192	0.0882568	0.45459	0.0882568	0.212158	0.117676	0.0400085	0.0782471	0.131592	0.0701904	0.75	0.845215	0.67627	0.647949	0.203735	0.9375	0.666504	0.431885	0.333252	0.45459	0.526367	0.492432	1	0.861328	0.811035	0.710938	0.414551	0.829102	0.387207	0.290283	0.677246	0.387207	0.606934	0.266602	0.822266	0.577148	0.22583	0.94043
ACH-000498	1	1	0.944336	0.944336	1				0.904785		1	1	0.799805	1	0.977539	0.710938	0.977539					0.95459	0.833496	1	0.928711	0.933105	1	1	1	0.653809	1	1	1	1	1					1	1	1	1		1	0.083313	0.962891	0.434814	1
ACH-000500	0.573242	0.399902	0.79834	0.964844	0.825195	0.693848	0.591797	0.571289	0.98291	0.877441	1	0.389648	0.388916	0.922363	0.48877	0.666504	0.177734	0.19043	0.406982	0.6875	0.799805	0.938477	0.992188	0.969727	0.983398	0.917969	0.981445	0.953613	0.9375	0.953125	0.796875	0.964355	1	1	0.981445	0.90918	0.954102	0.950684	0.913574	0.856934	1	0.986328	0.791504	0.95459	0.75	0.223633	0.913086	0.98877	0.981934
ACH-000501	0.916504	0.388916	0.483398	0.399902	0.677246	0.424316	0.54541	0.235352	1	0.833496	1	0.125	0.384521	0.769043	0.173096	0.173096	0.0384521	0	0.25	0.796875	0.96875	0.875	0.822266	0.977539	0.819336	0.855469	1	0.918457	0.956055	1	0.853027	0.772949	0.987305	1	0.927734	0.922852	0.75	0.925781	0.740723	0.935547	1	0.933105	0.967773	1	0.370361	1	0.5	0.245605	0.941406
ACH-000502	0.962891	0.777832	0.5625	0.9375	0.0625	0.827637	0.931152	0.773438	0.922852	1	1	0.0208282	0	0.272705	0	0.0454407	0	0.157837	0.848633	0.1875	0.28125	1	0.803711	1	0.93457	0.980469	0.922852	0.925781	1	0.962891	1	0.792969	1	0.976074	0.928711	0.300049	0.222168			1	1	0.928711	0.856934	0.428467			0.210571	0.199951	0.952148
ACH-000503	0.875	0.125	0.363525	0.327393	0.0217438	0	0.0400085	0	0.15625	0.310303	0.125	0.113953	0.147095	0.313477	0.0735474	0.208984	0.074646	0.0238037	0.0822144	0.246582	0.323975	0.179321	0.238037	0.285645	0.638672	0.194458	0.592773	0.90918	0.980469	0.5	0.482666	0.5	0.577637	0.979004	0.916504	0.308838	0.133301	0.307617	0.792969	0.571289	0.561523	0.385986	0.561523	0.833496	0.22583	0.21875	0.0671387	0.320068	1
ACH-000504	0.322266	0	0.00917053	0.00926208	0	0	0	0.382324	0.027771	0.0285645	0.0526428	0	0.225342	0.662109	0	0.225342	0.0140839	0	0.507812	0.27417	0.5	0.269775	0.868652	0.868652	0.218506	0.105957	0.31665	0.566895	0.178589	0.483398	0.321533	0.121521	0.489258	0.817383	0.610352	0	0.533203	0.456543	0.413086	0.0124207	0	0.0124207	0.00629044	0.402344	0.175415	0.0526428	0.055542	0.341553	0.614746
ACH-000505	0.730957	0.0192261	0.0588379	0.160034	0.0135117	0	0.0476074	0.210571	0	0.484863	0.117676	0.0194244	0.00901031	0.541504	0.293457	0.441406	0.558594	0.103455	0.514648	0.227905	0.514648	0.306885	0.279541	0.556152	0.727051	0.0129852	0.671875	0.748047	0	0.741211	0	0.238037	1	0.855469	0.756348	0.176514	0.396973	0.133301	0	0	0.03125	0	0	0.736816	0.162842	0	0.179077	0.341309	0.647949
ACH-000506	0.803711	0.856934	0.855469	0.741699	1	1	0.904785	1	0.842285	0.887207	0.894531	0.733887	0.677246	0.935547	0.32251	0.612793	0.580566	0.666504	0.878906	0.864746	0.958984	0.911133	0.951172	0.967285	0.956055	0.941895	0.973145	0.870117	0.913574	0.935059	0.888672	0.947266	1	1	1	0.914551	0.925781	0.98291	0.839355	1	0.958496	0.95459	0.919922	0.888672	0.924316	0.924316	0.910645	0.893066	0.995605
ACH-000507			0	0.0058136																							0.998047	0.998047		1						0	0											0.507324
ACH-000508	0.425537	0.326416	0.57373	0.519531	0.419678	0.134644	0.0961304	0.333252	0.972168	0.841309	0.972168	0.127075	0.134521	0.574707	0.121094	0.291504	0.100464	0.0872803	0.5625	0.284668	0.541504	0.799805	0.705078	0.733887	0.657715	0.503418	0.910645	0.830078	0.70752	0.748535	0.698242	0.785156	0.960938	0.980469	0.96582	0.566406	0.734375	0.807129	0.614258	1	0.906738	0.907715	0.727051	0.833496	0.466553	0.822266	0.682617	0.540527	0.985352
ACH-000509	0.63623	0.537109	0.344727	0.5	0.875	0.735352	0.818359	0.516113	0.888672	0.856934	0.777832	0.414551	0.868652	0.861328	0.842285	0.894531	0.763184	0.646973	0.740234	0.895996	1	0.973145	0.984863	0.984863	1	1	0.969727	0.971191	0.818359	0.972168	0.90918	1	0.974121	1	0.986816	0.975098	1	1	0.842285	0.952148	0.90918	0.95459	0.952148	0.846191	0.5	1	0.922852	0.957031	0.979492
ACH-000510												0	0	0.99707	0	0	1																																1
ACH-000511	0.965332	0.241333	0.323486	0.470703	1	0.0232544	0.0232544	0.0232544	0	0.0952148	0	0.714355	0.214233	0.464355	0.464355	0.464355	0.821289	0.0714111	0	0.0416565	0.458252	0.563965	0.596191	0.961426	0.98877	0.241699	0.920898	0.987305		0.797363		0.791504	1	1	0.97998	0.254883	0.196045	0.473633	0.166626	0.176514	0.470703	0.706055	0.176514	0.214233	0.63623	0.45459	0.48877	0.393311	0.983887
ACH-000513			0.380859	0.619141		0.4375	0.0625	0.142822		0.63623		0	0.0294189	0.411865	0.294189	0.0294189	0	0.611328	0.549805	0.449951	0.649902	1	0.952148	0.952148	0.979492	0.54541	0.703613	0.925781	0.950195	0.925781	0.899902	0.916504	0.856934	0.969727	0.875	0.03125	0.125	1	0.75		0.777832	0.777832	0.666504	0.944336	0.944336	0.166626	0.399902	0.571289	1
ACH-000514	0.959961	0.839844	0.866699	0.935547	0.5	0.5	0.5	0.5	0.75	0.759766	0.625	0.916504	0.571289	0.862305	0.655273	0.856934	0.586426	0.523926	0.9375	0.851074	0.82959	0.861328	0.906738	0.928711	0.935059	0.740234	0.961426	0.907227	0.875	0.852051	0.877441	1	0.844727	0.929688	0.965332	0.899902	0.899902	0.8125	0.6875	0.848633	1	0.969727	0.939453	0.904785	0.640137	0.839844	0.833496	0.741211	0.988281
ACH-000515	1	0.856934	0.928711	0.928711	0.82373	1	0.700195	0.600098	0.90918	0.922852	1	0.839844	0.258057	0.866699	0.516113	0.871094	0.64502	0.666504	0.833496	0.833496	0.888672	0.978516	0.783691	0.783691	0.875	0.888672	0.772949	0.913086	0.947266	1	0.947266	0.777832	1	1	1	0.904785	0.976074							0.75	0.419434	1	0.831055	0.944336	0.967285
ACH-000517	0.944336	0.611328	1	1					1	1	1	0.535645	0.184204	0.657715	0.236816	0.270264	0.184204	0.444336	0.51709	0.357178	1	0.623535	0.959961	1	0.941406	0.941406	0.976562	0.976074	1	0.941406	0.777832	0.806641	1	0.9375	1	0.533203	0.899902	1	0.875	1	1	1	1	0.615234	0.785645	0.856934	0.866699	0.933105	1
ACH-000518	0	0			0.51709	0.125	0.706055	0		0.199951			0	0	0	0	0		0	0	0	1	0.9375	0.9375	1	0.285645						0	1	1	0.527344	1	1			0	0	0.6875	0.6875				0.125	0.485596	0.973633
ACH-000519	0.952148	0.952148	0.869629	0.869629		0.899902	0.90918	0.90918		0.54541		0.95459	0.829102	0.853516	0.951172	0.829102	0.951172	1	0.821289	1	0.821289	1	0.928711	1	0.952148	0.952148	0.965332	0.862305	1	0.965332	1	1	1	0.893066	0.893066	0.833496	1	1	1						0.300049	0.600098	0.952148	0.956543	0.907715
ACH-000520	0	0	0.00606155	0.121216	0	0	0.098877	0.0116272	0.422119	0.581055	0.422119	0.00429153	0.0508423	0.0402222	0.0225983	0.0112991	0.0112991	0.00847626	0.158569	0.167358	0.167358	0.218628	0.155762	0.780762	0.701172	0.42334	0.830566	0.765625	0.384521	0.65918	0.155518	0.353027	0.727539	0.904785	0.536133	0	0.351318	0.772949	0.28125	0.0370483	0.222168	0.0384521	0.0370483	0.111084	0	0.0529175	0.0112076	0.232666	0.855957
ACH-000521	0.643066	0.321533	0.399902	0.195068	0.416748	0.555664	0.263184	0.473633	0.962891	0.882324	0.518555	0.452881	0.608887	0.811523	0.56543	0.643066	0.442871	0.210571	0.612793	0.806641	0.612793	0.540039	0.9375	0.9375	0.975586	0.585449	0.853516	0.926758	1	0.926758	1	0.958496	0.714355	1	0.938965	0.688965	0.577637	0.75	0.75	0.922852	1	1	0.769043	0.736816	0.600098	0.628418	0.43042	0.565918	1
ACH-000522	0.658691	0.463379	0.553223	0.702148	0.75				0.692383	0.555664	1	0.237549	0.568848	0.803711	0.568848	0.666504	0.353027	0.555664	0.657227	0.646973	0.706055	0.597656	0.633789	0.802734	0.945312	0.547852	0.853027	0.929688	0.938965	0.943848	0.754883	1	0.925781	0.814941	0.888672	0.5	0.577148	0.792969	0.51709	0.821289	0.872559	0.768066	0.678711	0.620605	0.5	0.538574	0.416016	0.744141	1
ACH-000523	1	0.769043	0.649902	0.649902	0.628418	0.333252	0.333252	0.333252	0.785645	0.833496	0.796875	0.583496	0.42041	0.873535	0.79541	0.82959	0.84082		0.444336	0.285645	0.285645	0.941406	0.464355	0.5	0.772949	0.605957	0.958496	0.915039	1	0.978516	0.925293	0.714355	0.969727	0.970215	0.984863	0.75	0.932129	0.911621	0.706055	1	1	1	0.541504	0.888672	1	1	0.363525	0.723633	0.964844
ACH-000524													0	0	0	0	0		0	0	0								1		1
ACH-000525			0.875	0.875					0.75	0.875	0.916504	0.899902	0.860352	0.976562	0.928711	0.930176	0.767578		0.700195	0.777832	0.777832	0.837891	0.846191	0.423096	0.9375	0.9375	0.854004	1	1	0.938965	1	1	0.965332	0.862305	0.965332									0.799805	0.595215	1	0.831543	0.893555	0.8125
ACH-000526	0	0	0	0	0.0270233	0	0	0				0	0	0.280029	0.23999	0.23999	0	0	0	0	0	0.579102			0.195068	0	0.0684814	0.108093	0	0.108093	0	0	0.6875	0.6875	0	0	0							0.789551	0	0	0	0.0227203	0.662598
ACH-000527	0.199951	0	0	0.350098	0.533203	0	0	0.153809	0.416748		0.694336	0.0400085	0	0.266602	0	0.133301	0.133301		0.333252	0	0.777832	0.461426	0.828613	0.942871	0.975586	0.829102	0.519043	0.865234	0.928711	0.942383	0.928711	0.861328	0.96875	1	0.90625	0.815918	0.842285			0.941406	0.706055	0.941406	0.82373	0.90918			0.333252	0.395264	0.980957
ACH-000528	0.946289	0.387207	0.347412	0.645996	0.0812988	0.0105286	0.0105286	0.0105286	0.588379	0.804688	0.588379	0.21106	0.531738	0.799805	0.261963	0.587402	0.468262	0.724121	0.987793	0.777832	0.790039	0.649414	0.794434	0.785156	0.957031	0.950684	0.859375	0.956543	1	0.90625	0.794434	1	0.979004	1	0.9375	0.856934	0.952148	0.86377	0.65918	0.625	0.958496	0.666504	0.291748	0.5	1	0.910156	0.664551	0.934082	0.970215
ACH-000529	0.826172	0.282715	0.288818	0.466553	0.273926	0.277832	0.0185242	0.115356	0.459961	0.594727	0.461426	0.168823	0	0.0930176	0	0.0697632	0.0232544	0	0.0384521	0	0	0.67627	0.465088	0.860352	0.518555	0.392822	0.553711	0.441162	0.265869	0.396973	0.0632935	0.470703	0.879883	0.819824	0.950195	0.160034	0.408203	0.931152	0.862305	0.833496	0.941406	0.803711	0.666504	0.861328	0.361084	0.083313	0.616211	0.581543	0.657715
ACH-000530	0.536621	0.585449	0.818359	0.969727	0.86377	0.961426	0.307617	0.461426	0.818359	0.807617	0.818359	0.689941	0.731934	0.87793	0.70752	0.804688	0.512207		1	0.444336	1	0.987793	0.973145	0.973145	1	0.98584	0.931641	0.917969	1	0.835449	0.814941		0.950684	0.967285	0.983398	0.926758	0.926758			0.75	1	1	1		0.567383	1	0.853027	0.940918	1
ACH-000532	0.728027	0.081604	0.160034	0.254395	0.19043	0.103455	0	0.172363	0.641113	0.810547	0.899902	0.0449829	0.027771	0.127808	0.0276184	0.10614	0.0220947	0.0129852	0.0750732	0.0963745	0.114441	0.52002	0.106384	0.157837	1	0.700195	0.661621	0.72168	0.339355	0.421143	0.428467	0.541016	0.941406	1	0.811523	0.503906	0.751953	0.612793	0.40332	1	0.792969	0.893066	0.899902	0.785645	0.42749	0.65332	0.157837	0.152222	0.902832
ACH-000534	0.649902	0.600098	0.617676	1	0.984863	0.899902	0.266602	0.0666504	0.75	0.75	0.8125	0.86377	0.938965	1	0.795898	0.979492	0.754883	0.444336	1	0	0	0.922852	0.976074	0.976074	0.965332	0.98291	1	1	0.95459	1	0.90918		0.983887	1	0.939453	1	1	1	1	0.804688	0.975586	0.755859	0.975586	1	0.28125	0.03125	0.621582	0.791016	0.902832
ACH-000535	0	0	0.0731812	0.390137	0.0370483	0	0	0.055542	0.0625	0.160034	0.15625	0	0.0476074	0.0714111	0.0238037	0.0487671	0.0476074	0	0.125	0.0673218	0.0404053	0.178955	0.0632935	0.392334	0.0638428	0.127686	0.177734	0.391357	0.298584	0.383057	0.0606079	0.740234	0.830078	1	0.5	0.033905	0.0508423	0.399902	0.133301	0.09375	0.03125	0.0625	0.121216	0.179443	0.192993	0.339355	0.187866	0.0526428	0.947266
ACH-000536	0.957031	0.811035	0.486572	0.504395	0.487793	0.67334	0.399902	0.541504	0.666504	0.661133	0.595215	0.748047	0.621094	0.924316	0.772949	0.661621	0.600098	0.137939	0.618164	0.45166	0.876953	0.88623	0.847168	0.981445	0.979004	0.783203	0.956543	0.942871	0.919434	0.978516	0.919434	0.952148	0.987305	0.961914	0.962402	0.957031	0.899902	0.965332	0.964844	0.914062	1	0.972168	0.864746	1	0.776367	0.788086	0.813965	0.88623	0.958008
ACH-000537	0.324463	0.0797729	0.00749207	0.0551453	0	0.0400085	0	0	0.600098	0.36499	0.439941	0.107483	0.0337219	0.219604	0.130005	0.0517273	0.118652	0.0638428	0.179688	0.137573	0.334961	0.266357	0.444336	0.572266	0.518555	0.287354	0.372559	0.356689	0.43457	0.262939	0.286621	0.452637	0.581543	0.9375	0.822754	0.109558	0.141357	0.442383	0.264648	0.383301	0.344238	0.333252	0.25415	0.5	0.505371	0.56543	0.407227	0.0889282	0.950195
ACH-000538					0								0.998535	0.993652	0.998535	0.996582	0.00158978								0	0
ACH-000539	1	0	0	0.227295	0.162476	0.0689697	0.51709	0.51709	0	0.3125	0.111084	0	0.307617	0.769043	0.846191	0.410156	0.487061	0				0.541504	0.820801	0.76123	0.853516	0.829102	0.434082	0.830078	0.62207	0.730957	0.0222168	0.111084	1	1	0.931152	0.146362	0.0625	0.0999756	0	0.333252	0.416748	0.25	0.75	0.416748	0.761719	0.428467	0.583496	0.0720825	0.746582
ACH-000540	0.34375	0	0.179443	0.358887	0.388916	0.083313	0.25	0.125	0.176514	0.272705	0.470703	0.0864258	0.0999756	0.179443	0.0999756	0.150024	0.0750122	0.233276	0.160767	0.0178528	0.160767	0.426025	0.594727	0.594727	0.818359	0.515137	0.54834	0.741699	0.962891	0.90332	0.592773	0.894531	0.267822	0.643066	0.0908813	0.45166	0.54834	0.807617	0.807617	0.403809	1	0.942383	1	0.399902	0.706055	0.764648	0.173096	0.28418	1
ACH-000541						0.807129	0.807129	0.194702		0.103455			0.991211	0.991211	0.991211	0.991211	0.991211		0.981445	0	1	1	0.990234	1									0.996094	0.996094	0.996094			0	1	1	1	1	1					1	0.969727
ACH-000542	0.75	0.384521	0	0.199951	0.102051	0.134644	0.115356	0.134644	0.321533	0.470703	0.541016	0.0181885	0.279297	0.661621	0.57373	0.5	0.428467	0.363525	0	0	0	0.234009	0.802246	0.820312	0.690918	0.291016	0.755859	0.814941	0.813965	0.802246	0.666504	0.700195	0.634277	1	0.951172	0.484375	0.5	0.5	0.333252	0.720703	0.79541	0.977051	0.976562				0.339355	0.462158	0.847168
ACH-000543					0	0.0434875	0.0434875	0.391357	0.807617	0.421143	1		0.189209	0.594727	0	0.189209	0		0.583496	0.416748	0.416748	0.176514	0.365967	0.615234	0.680664	0.489258	0.241943	0.765625	0.260986	0.4375	0.0217438	0.193604	0.720703	0.720703	0.953613	0.899902	1			0.555664	0.555664	0.481445	0.296387	0.119995			0.714355	0.620605	1
ACH-000544	0.0384521	0	0.0882568	0.176514	0.631348	0.242798	0.0869751	0.176514	0.441895	0.625	0.790527	0.0908813	0	0.133301	0	0.0625	0	0	0.150024	0	0.105286	0.714355	0.176514	0.941406	0.860352	0.465088	0.600098	0.928711	0.973145	0.761719	0.378418	0.807129	0.428467	1	0.869629	0.549805	0.649902	0.631348	0.444336	0.941406	1	1	1	0.666504	0.606934	0.285645	0.458252	0.346191	0.714355
ACH-000545	0.199951	0.0740967	0.155762	0.280029	0	0.0476074	0	0.116272	0.199951	0.183105	0.133301	0.241333	0.0898438	0.245361	0.167725	0.158569	0.185669	0.053772	0.0185242	0.130493	0.0246887	0.135498	0.22998	0.369385	0.222778	0.298828	0.362061	0.666504	0.84082	0.683105	0.111816	0.482666	0.979492	0.927246	0.839355	0.151978	0.15686	0.319336	0.450684	0.214233	0.401855	0.306396	0.369385	0.515137	0.211792	0.129395	0.243652	0.074646	0.902344
ACH-000546	0.476074	0	0.150024	0.146362	0.47998	0.375	0.3125	0.199951		0.538574		0.423096	0.411865	0.588379	0.529297	0.588379	0.411865	0.222168	0.314209	0.25708	0.371338	0.651367	0.782715	0.757324	0.760742	0.689941	0.652344	0.723633	0.785645	0.56543	0.785645	0.976074	0.982422	1	0.714355	0.53125	0.46875	0.666504	0.571289	0.5	0.643066	0.629395	0.5	0.944336	0.700195	0.700195	0.673828	0.534668	0.907715
ACH-000547	0	0.00680161								0.0999756		0	0	0	0.00564957	0.0112381	0	1				0.989746			0	0	0.375244	0.597168		0.593262		1	0	0.0212708	0			0	0	0.986816	0.995605	1	0.995605				0.961914	0.0521851
ACH-000548	0	0	0	0	0.371338	0.350098	0.233276	0.333252	0.180054	0.0793457	0.180054	0	0.180298	0.383301	0.196777	0.180298	0.0163879	0.0389709	0.247925	0.199951	0.252197	0.623047	0.23999	0.429932	0.580566	0.571289	0.529785	0.65332	0.5	0.70166	0.205078	0.335938	0.75	0.9375	0.773438	0.23877	0.216431			0.125	0.151855	0.140991	0.112488	0.417969	0.611816	0.403076	0.157593	0.285645	0.98877
ACH-000549	0	0	0.055542	0.588867	0	0.199951	0	0	1	0.416748	1	0	0.081604	0.173462	0	0.0927734	0	0	0.21106	0.386963	0.233521	0.0948486	0.643066	0.833496	0.794922	0.846191	0.794922	0.774902	0.560059	0.75	0.560059		1	1	0.967773	0.0750122	0.281982	0.696777	0.696777	0.0666504	0.933105	1	0.733398	0.399902	0.196777	0.311523	0.399902	0.175415	1
ACH-000550	0.769043	0.153809	0.0666504	0.0999756	0	0	0.136353	0.227295	0.0999756	0.357178	0.899902	0.463379	0.434814	1	0.760742	0.956543	0.56543	0.227295	0.367432	0	0.111084	0.579102	0.513672	0.811035	1	1	0.952148	0.761719	0.904785	0.952148	0.856934	0.894531	0.8125	0.818359	0.793945	0.214233	0.785645	1	0.5	1	1	1	1	0.111084	0.856934	0.952148	0.348877	0.246094	1
ACH-000551										0.5		0.00421906	0	0	0	0.0114975	0.0114288		0	0	0		0.00463104	0.00454712			0.321777	0.684082		0.686035		0.0128174	0.00403214	0	0					0	0.00408173	0	0				0		0.995605
ACH-000552																							1	1
ACH-000553	0.363525	0.272705	0.0434875	0.0526428	0	0	0	0.25708	0.0263214		0.538574	0.600098	0.130493	0.782715	0.217407	0.217407	0.695801	0.083313	0.142822	0.142822	0.357178	0.178589	0.333252	1	0.70166	0.859863	0.96875	0.878906	0.767578	1	0.790527	1	1	1	0.987793	0.217407	0.17395	0.916504	1	0.95459	0.953613	0.279053	0.79541	0.600098	0.407471	0.0740967	0.196777	0.560059	1
ACH-000554	0.904785	0.45459	0.526367	0.631348	0.148926	0.416748	0	0.416748	0.619141	0.4375	0.571289	0.219482	0.353027	0.588379	0.353027	0.5	0.117676	0.54541	0.846191	0.884766	0.807617	0.794922	0.799805	0.8125	0.802246	0.632324	0.901855	0.93457	0.743164	0.63916	0.918945	0.799805	0.910156	0.974121	0.871582	0.888672	0.930664	0.8125	0.666504	0.973633	0.894531	0.815918	0.710449	0.878906	0.916504	0.875	0.681152	0.577637	0.913574
ACH-000555	0.846191	0.346191	0.625	0.75	0.470703	0.175049	0.324951	0.205078	0.361816	0.852051	0.702148	0.966797	0.487793	0.975586	0.609863	0.755859	0.853516	0.536621	0.882324	0.82373	0.882324	0.774902	0.803223	0.950684	0.853516	0.268311	0.930664	0.902832	1	0.958496	0.657227	0.878906	1	1	1	0.899902	0.933105	0.941406	0.941406	0.922852	0.922852	0.922852	0.922852	0.941406	1	0.692383	0.449463	0.63623	0.985352
ACH-000557	0.75	0.75	0.94873	0.94873	0.95459	0.81543	0.522949	0.936523	0.918457	1	0.734863	0.98291	0.983398	1	0.580566	1	0.983887		0.948242	0.965332	0.98291	0.959473	0.768066	0.975586	0.973633	0.868652	0.964355	1	0.987305	0.981934	0.987305	1	1	0.930176	0.977051	0.674805	0.950195	0.586426	0.586426	1	1	1	0.979004	1	1	1	0.957031	0.930664	0.994141
ACH-000558	0.53125	0.40625	0.105286	0.394775	0.214233	0	0	0.176514		0.640137		0.419434	0.632812	0.897949	0.795898	0.916504	0.816406	0.192261	0.399902	0.5	0.640137	0.507324	0.87793	0.944336	1	0.913086	0.939941	0.97998	0.914062	1	0.885742	0.944336	1	0.899902	0.921387	0.9375	0.833496	0.944336	1	0.757812	1	0.90918	0.90918	0.928711	0.600098	0.674805	0.459473	0.51709	0.985352
ACH-000559	1	0.901855	0.868652	1	0.922852	0.774414	0.709473	0.90332	1	1	0.973633	0.696289	0.518066	0.736816	0.648926	0.719238	0.526367	0.75	0.97998	1	1	0.990234	1	1	0.943359	0.980957	0.98877	0.98877	1	1	1	1	1	0.942871	0.904785	0.842773	0.883301	1	1	0.950195	0.774902	0.975098	0.94873	0.976562	0.821289	0.856934	0.885742	0.92627	0.9375
ACH-000560	0.970703	0.956543	0.916504	1	0.75	0.8125	0.625	1	0.90625	0.833496	0.90625	0.842285	0.600098	0.977539	0.688965	0.727051	0.600098	0.826172	0.901367	0.742676	0.942871	0.986816	0.891113	0.927246	1	0.973145	0.958496	0.879883	1	0.959961	0.895996	0.9375	0.983398	1	1	0.968262	0.873047	0.939453	0.875	1	0.961426	1	1	1	1	1	0.981445	0.921387	0.987305
ACH-000561	0.219727	0.032959	0.132324	0.171387	0	0	0.199951	0.285645	0	0.254883	0.157837	0.187134	0.0689697	0.421143	0.103455	0.293213	0.0172424	0.040802	0.201782	0.140381	0.385986	0.724121	0.287109	0.583496	0.689453	0.571289	0.606445	0.818848	0.734863	0.748047	0.438721	0.536133	0.992676	0.94873	0.918945	0.414307	0.431885	0.333252	0.346191	0.467773	0.856934	0.633301	0.603027	0.43335	0.64502	0.64502	0.433838	0.386719	0.959961
ACH-000562			0	0.0999756	0	0	0	0.0588379	0.5	0.856934	0.84375	0.287842										0.219482	0.145508	0.963867	1	0.655273	0.950195	0.951172		0.975586			1	1	0.979492	0.600098	0.600098	1	0.5						0.833496	0	0.133301	0.0757446	1
ACH-000563	0.740723	0.222168	0.725098	0.950195	0.338135	0.3125	0.25	0.413086	0.133301	0.698242	0.233276	0.428467	0.627441	0.972656	0.945312	0.95459	0.891113	0.263184	0.25	0.527344	0.736328	0.668945	0.78418	1	0.855957	0.742676	0.873535	0.966309	0.943848	0.887695	0.809082	0.945312	0.955566	0.964844	0.973633	0.428467	0.428467	0.579102	0.579102	0.952148	1	0.833496	0.774902	0.958496	0.95459	0.953613	0.668457	0.717773	1
ACH-000564	0.600098	0.466553	0.081604	0.244873	0	0.227295	0	0.19043	0.45166	0.333252	0.193604	0.0666504	0.204834	0.573242	0.2771	0.421631	0.204834	0.275879	0.139526	0.162842	0.139526	0.105713	0.154663	0.081604	0.151855	0.0875244	0.480469	0.902344	0.344482	0.658691	0.415283	0.111084	0.515625	0.746094	0.723145	0.283691	0.253662	0.25	0.370361	0.916504	0.846191	0.922852	0.922852	0.199951	0.862305	0.896484	0.473389	0.317871	0.867676
ACH-000565	0.966797	0.166626	0.700195	1	0.956543	0.5	0.357178	0.166626	0.700195	0.54541	0.700195	0.0113602	0	0	0	0	0	0	0	0.0238037	0.0238037	0.814941	0.652344	0.695801	0.708496	0.458252	0.962891	0.814941	0.969727	0.75	1	0.930176	1	1	1	0.392822	0.0535583	0.478271	0.5	0.131592	0.526367	0.526367	0.394775	0.571289	0.888672	0.944336	0.29541	0.0232544	1
ACH-000566	0.0625	0	0.280029	0.577148	0.142822	0	0	0.625	0.111084	0.3125	0.0999756	0.51709	0.600098	1	0.850098	0.600098	0.600098	0	0.766602	0.766602	0.766602	0.456543	1	0.577148	1	0.741699	1	0.928711	1	1	0.977051	1	1	1	1	0.0400085	0.0384521	1	0.86377					0.888672	0.875	0.4375	0.222168	0.825195	1
ACH-000567	0.428467	0.733398	0.765625	0.921875	0.875				1	0.973633	0.875	1	0.814941	0.981445	0.981445	0.962891	0.907227	1	0.706055	0.75	0.970703	1	1	0.986328	0.975586	0.938477	0.984375	0.984863	1	0.984863	1	0.869629	1	0.966797	0.966797	0.90918	1	0.974121	0.947266	0.904785	0.90918	1	0.90918	1	0.885742	0.799805	0.953613	0.983887	1
ACH-000568	0.965332	0.933105	0.944336	0.971191	1				0.899902	0.897949	0.90918	0.938965	0.56543	0.913086	0.521973	0.826172	0.17395		0.969727	1	1	0.754395	1	1	0.987305	0.974121	0.953613	0.976562	0.967773	0.930176	0.774414	0.975098	0.890625	1	0.986328	0.948242	0.964844			1	0.922852	1	1	1	0.965332	1	0.847168	0.994141	1
ACH-000569																							1	0.995117	1	1			1		0.994141														1	1		0
ACH-000570	0.0814209	0	0.0126572	0.0126572	0	0	0	0	0.0666504	0.15625	0	0.0789185	0	0	0	0.0526428	0	0	0.0793457	0.111084	0.158691	0.0499878	0.158936	0.125854	0.252197	0.277344	0.468018	0.387695	0.210571	0.428467	0.0526428	0.0422668	0.448242	0.953613	0.511719	0.111084	0.133301	0	0	0.0512695	0.102539	0.0769043	0.135132	0.163208	0.0294189	0.205933	0.25415	0.282715	0.899414
ACH-000572	0.0106354	0	0.00854492	0.00862122	0.0249939	0.0476074	0.0238037	0.0750122		0.153809	0	0.0146332	0.0227203	0.279053	0	0	0.0476074	0.153809	0.0327759	0.0333252	0.0661011	0.157593	0.213745	0.343506	0.404541	0.318359	0.583496	0.331055	0.108459	0.0596008	0.303711	0.395508	0.242676	0.578613	0.419922	0.214233	0.142822	0.0212708	0.0340881	0.0227203	0.279053	0.34082	0	0.0596924	0.184204	0.118408	0.0446777	0.254395	0.820312
ACH-000573	0.529297	0	0.083313	0.23999	0.199951	0.055542	0.166626	0.777832		0.727051		0.256348	0.230713	0.653809	0.269287	0.346191	0.346191	0.230713	0.166626	0.235352	0.353027	0.69043	0.527832	0.75	0.842285	0.920898	0.862305	0.896484	0.933105	0.51709	0.899902	0.755859	0.933105	0.977539	1	0.533203	0.399902			0.600098	0.399902	1	0.700195	0.54541	0.75	0.75	0.54248	0.487793	0.975586
ACH-000574	0.975586	0.228882	0.812012	0.920898	0.757812	0.689453	0.233276	0.413818	0.80957	0.73584	0.952148	0.449707	0.448242	0.643066	0.35083	0.741211	0.315674	0.195068	0.943848	0.895996	0.918457	0.894531	0.922363	0.901855	0.889648	0.906738	0.945312	0.946777	1	0.945801	0.882324	0.958984	0.948242	0.986816	1	0.864258	0.949219	0.967285	0.933105	0.681641	0.782715	0.739258	0.652344	0.884766	0.609375	0.815918	0.658203	0.890137	1
ACH-000576			0.966797	1	0.775391	0.978516	0.978516	0.808594	0.742676	0.600098	0.714355	0.962402	0.928711	0.571289	0.928711	1	1	0.75	0.825195	0.825195	0.975098	1	1	0.986328	0.956055	0.882324	0.838867	0.96875	1	0.9375	0.901367	1	1	1	0.936523	0.839355	0.913574	0.875	1	1	1	1	1	0.619141	0.899902	0.700195	0.907715	0.821777	1
ACH-000577			0	0									0	0	0	0	0					1					0.986328	1		1										0	0	0	0				0.30127	0.0114975
ACH-000578	0.780273	0.634277	0.796387	0.722168	0.743652	0.774414	0.300049	0.399902	0.96875	0.879883	0.71875	0.80957	0.461426	1	0.846191	0.807617	0.538574	0.818359	0.958496	0.916504	0.872559	0.928711	0.958984	1	1	0.918945	0.944336	1	0.960938	1	0.980957	0.945801	0.988281	0.988281	0.930176	0.904297	0.986328	1	0.916504	0.871094	0.967773	0.967773	0.90332	1	0.935547	0.935547	0.95459	0.868164	0.931641
ACH-000579	0	0			0	0.00613403	0.00613403	0.0122681	0.0357056	0.0769043	0.0714111		0.122437	0.0434875	0.125	0.122437	0.122437		0	0	0	0.67627	1	1	0	0	0.986328	0.5	0.0434875	0.722168	0.0434875	1	1	1	0.541016	0.916504	0.916504			0.0196075	0	0.980957	0.980957	0.528809	0	0.0625	0.280029	0.0333252	1
ACH-000580	0.083313	0	0.111084	0.0222168	0	0	0.125	0.0908813	0.264648	0.423096	0.646973	0.541016	0.311035	0.466553	0.466553	0.62207	0.466553	0	0.799805	0.859863	0.799805	0.46875	0.796387	0.852051	0.966797	0.700195	0.946289	0.964355	0.757812	0.893066	0.970703	0.969727	0.972168	1	1	0.5	0.609375	1	0.0769043	0.300049	0.25	0.0999756	0.150024	0.399902	0.388916	0.666504	0.226196	0.783203	0.976562
ACH-000581	0.965332	0.965332	1	1	1	0.75	0.0192261	1	1	0.538574	1	0.0058136	0.0675659	0.0272064	0.0608215	0.0135117	0.0135117	0	0	0	0	0.878906	0.828613	0.935059	0.828125	0.895996	0.995117	1	0.990723	0.944336	0.895996	0.769043	1	0.993652	1	0.84375	0.96875			0.742676	1	1	1	1	0.985352	0.956055	0.601074	0.863281	1
ACH-000582	0	0	0.0961304	0.0384521	0.0169525	0.0943604	0.0377502	0.153809	0.03125	0.111084	0	0.0447693	0.153809	0.397461	0.0640869	0.179443	0.256348	0	0.142822	0.107117	0.142822	0.292969	0.432373	0.493164	0.536621	0.231567	0.416748	0.72998	0.399902	0.92041	0.254639	0.258057	0.740234	0.791992	0.791992	0.150024	0.0185242	0	0	0.370361	0.43335	0.0666504	0.379395	0.19043	0	0.0652466	0	0.0684204	0.613281
ACH-000583																							0.998535	1
ACH-000584												0	0	1	0.592285	1	0.407471		1	1	0.993164				1	1							1	1	1			1	1	1	1	1	1				0
ACH-000585	1	0.722168	0.958496	0.958496	0.977051	0.8125	0.6875	1	0.399902	1	1	0.297363						0.63623	0.899902	0	0.899902	1	0.8125	1	0.970703	0.970703	1	1	0.877441	1	1	1	1	1	1	0.984375	1			0.119995	0.199951	0.47998	0.560059	1	0.950195	0.950195	0.974121	1	1
ACH-000586	0.956543	0.826172	0.678711	0.785645	0.318115				1	0.814941	0.652344	0.692383	0.435791	0.230713	0.205078	0.384521	0.128174	0.176514	0.727051	0.875	1	0.743164	0.574707	0.78418	0.944824	0.802246	0.941406	0.922852	0.910645	0.980957	0.964355	1	0.961426	0.919922	1	0.859375	0.98584	0.941406	0.941406	0.706055	1	1	1	0.82373	0.294189	0.78418	0.601562	0.941406	0.962402
ACH-000587	0.975586	0.166626	0.785645	0.947266	0.486328	0.608887	0.5	0.63623	0.941406	0.971191	0.941406	0.304443	0.573242	0.82666	0.706543	0.693359	0.712402	0.592773	0.47998	0.583496	0.95752	0.952148	0.976074	0.986328	0.991699	0.748047	0.898438	0.985352	0.978516	0.938477	0.914062	0.977539	1	0.990234	1	0.759766	0.990234	1	0.847656	1	1	0.977539	0.59082	1	1	1	0.569824	0.895996	0.908203
ACH-000588												1													0	0																		0.00178242
ACH-000589	0	0				0	0	0	0.00598907		0.0119781	1	0	0	0	0	0.0294189		0	0.00369072	0	0	0	0	0.106079	0						0.0088501	0.206543	0.989258	0.206543	0	0	0.583984	0.594727	0	0	0	0	0	0	0	0.535645	0.00653458	0.00873566
ACH-000592	0.027771	0	0	0.083313	0	0	0	0		0.0416565		0.0263214	0	0.346191	0.307617	0.320068	0.3479	0	0.0384521	0	0.0416565	0	0	0	0.0370483	0	0.0200043	0.565918	0.63623	0.461426	0.0454407	0	0.884766	1	0.884766	0	0	0	0	0.111084	0	0	0.111084	1	0.263184	0.263184	0.0270233	0.0181885	0.976074
ACH-000593	0.962891	0.444336	1	0.952148	1	0.571289	0.142822	0.214233		1		0	0.571289	0.571289	0	0.946289	0	0	0.300049	0.300049	0.674805	1	1	1	1	1	1	1	1	1	1	1			0.777832	0.442383	0.442383	0	0.5	0.297363	1	1	0.579102	0.888672	1	1	0.754395	0.435791	1
ACH-000594	1	1	0.95459	1	0.90332	0.95459	0.818359	0.818359	1	0.871094	0.9375	0.739258	0.511719	0.930176	0.604492	0.906738	0.511719	0.75	0.970703	0.941406	0.63623	0.910645	0.952148	0.952148	1	1	0.963867	1	1	0.981934	0.9375	1	1	1	0.839844	1	1	0.899902	0.866699	1	1	1	1	1	0.449951	0.975098	0.897461	1	1
ACH-000595	0.00724792	0	0	0	0	0	0.0256348	0.0256348	0.115356	0.246582	0.192261	0.045105	0	0.0689697	0.0666504	0.0666504	0.166626	0.0499878	0.151001	0.1698	0.346191	0.193115	0.211304	0.263916	0.146729	0.0733643	0.444336	0.396484	0.308594	0.275879	0.247437	0.142822	0.709473	0.822754	0.541016	0.171387	0.142822	0.402344	0.192261	0.196045	0.346191	0.192261	0.173096	0.275879	0.372559	0.0784302	0.0744629	0.177002	0.821777
ACH-000596	0.625	0.283447	0.268555	0.470215	0.155518	0.0810547	0.108093	0.138916	0.709473	0.723633	0.90625	0.04245	0.129272	0.273926	0.081604	0.0206909	0.081604	0.0111084	0.333252	0.235596	0.188477	0.369141	0.549316	0.537109	0.815918	0.343994	0.876953	0.905273	0.739746	0.756836	0.861816	0.5625	0.959473	0.959473	0.929688	0.328857	0.5	0.808105	0.722168	0.338623	0.360596	0.45166	0.45166	0.522461	0.432373	0.324219	0.2229	0.735352	0.96582
ACH-000598	1	1				0.6875	0.9375	0.9375	0.950195	0.875	0.950195	0.956543										1			1	1			1		1	1	0.969727	1	0.788086	1	1							1	0.875	1	0.962891	0.899902	1
ACH-000599	0.872559	0.446777	0.51416	0.856934	0.3125	0.666504	0.333252	0.416748	0.799805	0.695801	0.866699	0.260498	0.285645	0.482666	0.241333	0.321533	0.413818	0.399902	0.490479	0.423096	0.480713	0.443115	0.822754	0.961426	0.890625	0.75	0.827637	0.932129	0.962891	0.881348	0.759277	0.833496	0.938477	0.938477	1	0.625977	0.622559	0.852051	0.481445	0.869629	0.869629	0.869629	0.791504	1	0.777832	0.777832	0.591309	0.884277	0.966309
ACH-000601																						0.996094			0.983398	0.983398												1	1
ACH-000602	0.866699	0.25	0.388916	0.837891	0.510742	0.0856934	0.485596	0.657227	0.769043	0.722168	1	0.615234	0.25	0.45459	0.083313	0.5	0.416748	0.411865	0.625	0.324951	0.150024		0.0400085	1	1	1	0.449951	0.399902	1	0.899902	1	1	1	1	0.866699	0.538574	1			0.153809	1	1	1	1			0.8125	0.643066	0.984863
ACH-000603	0.911621	0.63623	0.588379	0.666504	0.615234	0.75	0.25	0.625		0.6875		0.612305	0.575195	0.876953	0.685059	0.944336	0.76709	0.549805	0.637695	0.827637	0.810547	0.943848	0.760742	0.846191	0.876465	0.842773	0.887695	1	0.953613	0.938965	0.90918	0.930176	0.90332	0.933105	0.935547	0.849121	0.890625	0.882324	0.764648	0.75	0.875	0.899902	0.709473	1	0.90918	0.79541	0.830566	0.774902	0.951172
ACH-000604			1	1	0	0.027771	0.027771	0.055542	0	0.0666504	0	0.491455	0.0137024	0.256836	0.378418	0.635254	0.256836		0	0.0526428	0.0526428	1	1	1	1	1	1	1		1		0	1	0.976562	0.976562	0	1	0.549805	0.563965			0.875	0.875	1	0.515137	1	0.444336	0.413086	1
ACH-000605	0.388916	0.055542	0.150024	0.262207	0.428467	0.363525	0	0.300049	0.428467	0.407471	0.8125	0.161743	0.0256348	0.791992	0.115356	0.324707	0.256348	0.163696	0.397461	0.486816	0.618652	0.640137	0.430664	0.810059	0.646484	0.534668	0.796875	0.771484	0.856934	0.768066	0.527344	0.679199	0.945801	0.945801	0.917969	0.305908	0.411865	0.414551	0.649902	0.922852	0.769043	0.922852	0.846191	0.90332	0.666504	0.666504	0.423828	0.396484	0.983887
ACH-000606	0.733398	0	0.363525	1	0.111084	0.555664	0.166626	0.333252	0.633301	0.666504	0.45166	0.0357056	0.304443	0.608887	0.217407	0.0434875	0.0434875	0	0	0	0.421143	0.270508	0.964355	0.821289	0.896484	0.949219	0.844238	0.822266	0.560059	0.444336	0.320068	0.904785	1	1	1	0.702148	0.6875	0.59375	0.516113	1	1	1	0.763184		0.45459	0.45459	0.72168	0.353027	0.981934
ACH-000607	0.375	0.0113602	0.70166	0.666504	0.459473	0.353027	0.388916	0.646973	0.608887	0.549316	0.759766	0.328857	0.65918	0.955566	0.558105	0.977051	0.977051	0.64502	0.598145	0.621094	0.489502	0.59082	0.914062	0.927734	0.991211	0.805176	0.837891	0.944336	0.918457	0.861328	0.856934	0.913086	0.9375	0.925293	0.882812	0.450928	0.548828	1	0.833496	0.43335	0.967773	0.871094	0.967773	0.777832	0.953613	0.976562	0.495605	0.895508	0.937988
ACH-000608	0.447754	0.0298462	0	0.0107498	0	0.0375061	0.199951	0.164551	0.214233	0.458252	0.285645	0.0692139	0	0.0671387	0	0.00662231	0	0	0.032959	0.0219727	0.0439453	0.339355	0.265137	0.385498	0.513184	0.118408	0.300049	0.617188	0.389404	0.444336	0.336914	0.142822	0.375	1	1	0.240967	0.109741	0.21875	0.222168	0.696777	0.666504	0.515137	0.212158	0.205933	0.591797	0.333252	0.0322571	0.0625	0.743164
ACH-000609	0.199951	0.0249939	0.0200043	0.0196075	0	0	0	0	0.287598	0.543457	0.164429	0.0243835	0.0377502	0.75	0.716797	0.384521	0.20752		0.313965	0.337158	0.441895	0.864258	0.768066	0.971191	0.692383	0.553711	0.896484	0.949219	0.350098	0.830566	0.300049	0.571289	0.779785	1	0.967285	0	0	0.307617	0.25	0.566895	0.899902	0.566895	0.566895	0.780273	0.575195	0.5	0.27417	0.67041	0.922852
ACH-000610	0.753906	0.784668	0.784668	0.81543	0.706055	0.643066	0.714355	0.714355	0.629395	0.690918	0.518555	0.505859	0.459473	0.783691	0.270264	0.675781	0.351318	0.25	0.773438	0.692383	0.788574	0.828125	0.87207	0.941895	0.899902	0.787598	0.92041	0.890625	0.85498	0.825195	0.791016	0.85498	0.904297	0.982422	0.938477	0.756348	0.883301	0.811523	0.79248	0.844238	0.888672	0.799805	0.822266	0.625	0.524902	0.5	0.503906	0.729492	0.972168
ACH-000611	0.0344849	0.103455	0.652832	0.652832	0	0	0	0.0416565	0.464355	0.63623	0.444336	0.578125	0.518555	0.962891	0.852051	0.888672	0.666504	0.75	0.899902	0.899902	0.724121	0.899902	0.769043	1	1	1	0.966797	0.966797		0.966797		1	1	0.899902	0.952148	0.566895	0.464355	1	0.684082	1	1	1	0.941406	1	0.142822	0.643066	0.409668	0.0185242	0.974121
ACH-000612	1	0.888672			1	1	0	1	1		1	1	0.962891	1	0.777832	0.814941	0.814941	1	0.977051	0.568359	0.977051		1	1	1	0.947266	0.289795	0.847168	1	0.861328	1	1	1	1	0.958984	1	1	1	1						0	1	0.959961	0.884766	0.972168
ACH-000613	0.25293	0.09198	0.235352	0.353027	0.357178	0.125	0.1875	0.4375	0.933105	0.581543	0.799805	0.0192261	0.215332	0.753906	0.153809	0.40625	0.261475	0.32251	0.123291	0.23291	0.205444	0.652832	0.793457	0.950195	1	0.71582	0.986816	0.895996	1	0.934082	0.75	0.92041	0.980957	0.961426	0.980957	0.842285	0.884277	1	0.945801	0.162842	0.441895	0.438965	0.37207	0.357178	0.685547	0.628418	0.378174	0.741699	0.962402
ACH-000614	0.0227203	0	0.055542	0.0535583	0.111084	0	0	0.333252	0	0.285645	0.0588379	0.0394592	0.175049	0.538574	0	0.281982	0.0256348	0	0.0599976	0.0200043	0.0200043	0.387695	0.538574	0.692383	0.777832	0.543457	0.434082	0.807129	0.157837	0.491211	0.210571	0.579102	1	0.859863	0.819824	0.25	0.229126	0	0	0.300049	0.199951	0.199951	0.199951		0.294189	0	0.310303	0.416748	0.907715
ACH-000615	0.399902	0.027771	0	0	0.114258	0	0	0.310303	0.210571	0.527832	0.421143	0	0.0731812	0.230713	0.219482	0.274902	0.243896	0	0.116272	0.0476074	0.162842	0.129028	0.23999	0.640137	0.485352	0.405762	0.285645	0.515137	0.643066	0.302979	0.341553	0.440674	0.827148	0.942383	0.980957	0.0566101	0.1698	0.25	0.111084	0.5	0.6875	0.25	0.388916	0.45459	0.294189	0.375	0.0810547	0.75293	0.98291
ACH-000616	0.59082	0.0454407	0.300049	0.489258	0.0416565	0.0370483	0	0.481445	0	0.32251	0.444336	0.306152	0.383057	0.723633	0.766113	0.130493	0.766113	0	0.020401	0.020401	0	0.381836	0.411865	0.529297	0.381836	0.381836	0.979492	1	0.611328	0.530762	0.138916	0.272705	1	1	1	0.0243835	0.199951	0.272705	0.344727	0.54541	1	0.54541	1	1	0.90625	0.6875	0.19397	0.568359	0.979492
ACH-000617	0.777832	0.333252	0.617676	0.696777						0.583496		0.121948	0.142822	0.181763	0.0714111	0.214233	0.153809		0.272705	0.363525	0.571289	0.370361	0.625	0.958496	1	0.633301	0.75	0.86377	1	0.90918	0.899902	0.799805	0.875	0.958496	0.916504	0.75	0.523926				0.899902	0.888672	0.700195	0.777832	0.5	0.899902	0.147095	0.153809	1
ACH-000618	0.648438	0.708984	0.847168	0.790527	0.417969	0.266602	0.0166626	0.406738	0.791016	0.819824	0.786621	0.79541	0.697754	0.972656	0.708496	0.899414	0.506836	0.727051	0.887695	0.815918	0.839844	0.829102	0.680176	0.758301	0.893555	0.673828	0.876953	0.990723	0.982422	0.974609	0.982422	0.916504	0.969727	0.969238	0.939453	0.886719	0.71875	0.854492	0.754395	0.974121	0.986816	0.948242	0.727051	0.600098	0.767578	0.882812	0.590332	0.727051	0.966797
ACH-000619	0	0	0.272705	0.212158	0.112915	0.333252	0.0666504	0.666504	0.380859	0.727051	0.0952148	0.0517273	0.214233	0.5	0.153809	0.230713	0.230713	0.153809	0.5	0.236816	0.355225	0.355225	0.913086	0.913086	0.95459	0.477295	0.75	0.982422	0.980469	1	0.568848	0.776367	0.605957	0.746094	0.626953	0.786621	0.640625	0.777832	0.5	0.0952148	0.29541	0.5	0.441895	0.805664	0.447266	0.421143	0.725586	0.926758	0.993652
ACH-000620			0	0		0	0	1				0													1	1						1												0
ACH-000621	0.205933	0.294189	0	0	0.153809				0.894531	0.266602	0.666504	0	0.178589	0.678711	0.0714111	0.214233	0.214233	0	0.350098	0.421143	0.947266	0.0980225	0.529297	0.941406	0.793945	0.382324	0.703613	1	1	1	0.75	0.555664	0.333252	1	0.888672	0.375	0.291748			0.708496	0.708496	0.333252	0.25	0.363525	0.181763	0	0.0999756	0.47876	0.583496
ACH-000622			0	0.00348473	0					0.00456619		0	0	0	0	0.00184536	0								0.430908	0			0		0																		1
ACH-000623	0.0596924	0.0596924	0.0272064	0.0946045	0.0183411	0	0	0.0232544	0.0212708	0.164551	0.0425415	0.290283	0	0	0	0.263184	0.210571	0.0999756	0.181763	0.00909424	0.0181885	0.0992432	0.0133362	0.276367	0.539551	0.17981	0.467041	0.497314	0.134155	0.32251	0.0249939	0.637695	0.687012	0.816895	0.763184	0.0188751	0.151001	0.439941	0.640137	0	0.119995	0	0.0800171	0.333252	0.356201	0.126465	0.256104	0.132202	0.816406
ACH-000624	0.045105	0.0223846	0.207397	0.316162	0.0724487	0.0227203	0	0.0340881	0.382568	0.33667	0.301758	0.142212	0.0337219	0.610352	0.0842896	0.112976	0.196655	0	0.128174	0.120667	0.310303	0.73584	0.456055	0.868652	0.883301	0.558594	0.809082	0.875	0.909668	0.75	0.76709	0.786133	0.967285	0.962891	0.967773	0.277344	0.378174	0.852051	0.698242	0.241333	0.63623	0.647949	0.32959	0.423828	0.159302	0.212402	0.44873	0.637695	0.992188
ACH-000625	0.235352	0	0	0.0625	0.09375	0	0	0.0908813	0.535645	0.625	0.964355	0	0	0.0333252	0	0	0	0	0.157837	0.108093	0.297363	0.085083	0.0526428	0.533203	0.0731812	0.292725	0.196411	0.333252	0.13208	0.258057	0.0188751	0.660156	0.688477	0.818359	0.815918	0.152588	0.25415	0.192261	0.192261	0.0222168	0.155518	0.177734	0.222168	0.608887	0.45459	0.136353	0.0454407	0.242676	0.725098
ACH-000626	0.725586	0.450928	0.222168	0.315186	0.333252	0.153809	0.230713	0.333252	0.444336	0.259277	0.555664	0.308594	0.216187	0.805664	0.432373	0.378418	0.270264	0.176514	0.28125	0.1875	0.234375	0.43335	0.389404	0.463135	0.605469	0.416016	0.663086	0.885254	0.929688	0.937012	0.631348	0.410889	0.92041	0.953125	0.913574	0.5	0.32959	0.399902	0	0.888672	0.814941	0.796387	0.703613	0.959961	0.871094	0.838867	0.452148	0.363281	0.904297
ACH-000627	0.102356	0.00787354	0.224243	0.355225	0.761719	0	0	0.177368	0.591797	0.413818	0.632812	0.419434	0.476807	0.676758	0.476807	0.234375	0.230713		0.380859	0.714355	0.726074	0.779785	0.816406	0.829102	0.507812	0.571289	0.874023	0.92334	0.77002	0.92334	0.680176	0.555664	0.884277	0.947266	0.828125	0.671387	0.807617	1	0.876953	0.209717	0.709473	0.935547	0.85498	0.539551	0.838867	0.838867	0.618164	0.558594	0.907715
ACH-000628	0.913574	0.382812	0.336182	0.658203	0.235352	0.300049	0.236084	0.0869751	0.615234	0.670898	0.928711	0.348877	0.181763	0.644531	0.142822	0.342041	0.116882	0.128174	0.546387	0.527832	0.655273	0.373779	0.587891	0.819824	0.82959	0.71582	0.885254	0.947266	0.910645	0.940918	0.686523	0.543945	0.932617	0.898926	0.915527	0.645996	0.623047	0.709473	0.494385	0.617188	0.9375	0.913086	0.895996	0.882324	0.752441	0.520508	0.469238	0.794434	0.933105
ACH-000630	0.479248	0.458252	0.195068	0.674805	0.215698	0.651367	0.574219	0.738281	0.709961	0.977539	0.901367	0.0700073	0.130981	0.25293	0.119019	0.280518	0.178589	0.166626	0.198364	0.0333252	0.475098	0.515137	0.486572	0.4375	0.809082	0.618164	0.95166	0.972656	0.811523	0.807129	0.643066	0.989746	0.958984	0.896973	0.870117	0.807129	0.76416	0.346924	0.367432	0.602051	0.80957	0.933105	0.932617	1	0.272705	0.530273	0.450439	0.811523	0.986816
ACH-000631										0.398193												0																										0
ACH-000632	0	0	0	0.020401	0	0.0285645	0.0285645	0.114258	0.0499878	0	0.0499878	0.0238037	0.09375	0.375	0.09375	0.25	0.09375	0	0.0526428	0.0175476	0.0181885	0.51416	0.4375	0.458252	0.700195	0.43335	0.355469	0.541504	0.0727539	0.333252	0.0535583	0.600098	0.720215	0.759766	0.646973	0.179443	0.102539	0	0	0.333252	0.19043	0.238037	0.19043	0.600098	0.280762	0.35083	0.107849	0.214233	0.799805
ACH-000633	0.085083	0	0.181763	0.157837	0.491699	0.113647	0	0.116272	0.63623	0.525391	0.509277	0.124268	0.106812	0.485352	0.184448	0.47583	0.107849	0.319092	0.240845	0.182495	0.132324	0.768066	0.684082	0.947754	0.791016	0.708984	0.89209	0.880859	0.851562	0.891602	0.844727	0.619629	1	0.961914	0.968262	0.63623	0.651367	0.946289	0.729004	0.612305	0.806152	0.67334	0.536133	0.708984	0.65332	0.680176	0.645508	0.675293	0.944824
ACH-000635	1	0.793945	0.67627	1	0.953613	1	0.583496	0.583496		0.86377		0.701172	0.58252	0.960938	0.883301	0.864258	0.747559	0.922852	0.973145	1	1	0.981934	0.987793	0.926758	0.959961	0.850098	0.88623	0.897949	0.723633	0.977051	0.978516	0.796387	0.880371	0.985352	0.956055	0.987305	0.936035	1	1	0.922852	0.922852	0.922852	0.538574	1	0.897461	1	0.609375	0.970215	0.986328
ACH-000636	1	1	0.931641	1	1					0.973633		1	1	1	1	1	0.871094	1	1	1	1	0.894043	0.976074	0.915527	0.979492	0.979492	1	1	1	1	1	1	1	1	1	0.985352	0.985352	1	1	1	1	1	0.399902	1	0.856934	1	1	1	1
ACH-000637			1	0.990234	1							0										1			1	1	1	1		1		1															0.797852	0.543457
ACH-000638	0.921387	0.325928	0.22522	0.657715	0.181763	0.291748	0.208374	0.304443	0.0800171	0.755371	0.360107	0.77832	0.687988	0.957031	0.634277	0.817383	0.763672	0.199951	0.4729	0.359375	0.851562	0.52002	0.546875	0.879883	0.94043	0.496582	0.875	0.963867	0.90918	0.971191	0.591797	0.660645	1	0.979004	0.979004	0.464111	0.588379	0.794922	0.829102	0.730469	0.854004	0.663086	0.842773	1	0.846191	0.717773	0.649414	0.669922	0.976074
ACH-000639	0	0.0666504	0.055542	0	0	0	0	0	0.166626	0.611328	0	0	0	0	0	0	0		0	0.0384521	0.0769043	0.761719	0	0	0.399902	0	0.0333252	0.0333252	0	0.0333252	0	0.199951	0.217407	0.130493	0.0869751	0.0588379	0.117676	0.0769043	0.230713	0.0666504	0.0666504	0.333252	0.199951	0.111084	0.0999756	0.0999756	0.714355	0.230713	0.735352
ACH-000640	0.033905	0.033905	0.0370483	0.0185242	0	0.0416565	0	0	0.0344849	0.083313	0	0	0	0	0	0	0.0999756	0	0	0.142822	0.142822	0.466553	0.274902	0.25	0.29834	0.315674	0.344238	0.258057	0.270752	0.0484009	0.106384	0.172363	0.581543	0.534668	0.441895	0.0181885	0.036377	0.125	0.030304	0.0416565	0.0384521	0.160034	0.0384521	0.133301	0.142822	0	0.033905	0	0.32251
ACH-000641	0.77002	0.488525	0.716797	0.672363	0.459473	0.399902	0.649902	0.696289	0.84082	0.778809	0.681641	0.729004	0.19812	0.643555	0.252197	0.539062	0.247681	0.377441	0.697754	0.452637	0.489502	0.870117	0.891113	0.949219	0.894043	0.609375	0.922363	0.912598	0.80957	0.884766	0.523926	0.977539	0.983398	0.949219	0.856934	0.569336	0.550781	0.733398	0.644531	0.399902	0.9375	0.9375	0.9375	0.818359	0.5	0.446533	0.703125	0.63916	0.995117
ACH-000643	0.0777588	0.0331421	0.00965881	0.0280304	0.0899048	0	0.085083	0.229126	0.128174	0.195068	0.102539	0.114807	0.0274048	0.123291	0.0933228	0.189209	0.106689	0.125	0.138916	0.208862	0.229858	0.114868	0.133301	0.272705	0.345703	0.30835	0.281006	0.589844	0.572754	0.561035	0.411865	0.2771	0.650391	0.887207	0.631348	0.335938	0.291016	0.263672	0.23584	0.18335	0.327637	0.280762	0.379395	0.513184	0.451172	0.230347	0.26001	0.09729	0.597168
ACH-000644	0.181763	0.083313	0	0	0	0.0625	0.125	0		0		0.1875	0	0.266602	0	0	0		0.0740967	0.222168	0.0740967	0.399902	0.434814	0.708496	0.333252	0.555664	0.625	0.882324	0	0.411865	0.333252	0.75	0.5	0.899902	0.899902	0.25	0.375			0.5	0.333252	0.5	0.5	0.833496	0.199951	0.333252	0.0625	0.35083	0.964355
ACH-000645	0.455811	0.0379639	0.0441284	0.132324	0	0.175903	0.0925903	0.0462952	0.353027	0.285645	0.254883	0.320801	0.160522	0.259277	0.19751	0.300049	0	0.0200043	0.805176	0.666504	0.871582	0.694336	0.77002	0.954102	0.917969	0.493164	0.688965	0.947266	0.932617	1	0.865234	0.802734	1	0.697266	0.950195	0.148193	0.222168	0.711914	0.424316	1	1	0	0.799805	0.915527	0.977051	0.70459	0.157593	0.421143	0.979004
ACH-000646	0.905762	0.151001	0.25	0.333252						0.677246		0	0.212769	0.608887	0.297852	0.680664	0.276611	0.318115	0.5	0.192261	0.294922	0.54248	0.719727	0.914551	0.680176	0.453369	0.785645	0.958496	0.972656	0.986328	1	0.850098	0.962891	0.962891	0.731934	0.487549	0.587402	0.605957	0.515137	0.327881	0.868652	0.458984	0.34375	0.764648	0.666504	0.641113	0.687012	0.910156	0.973145
ACH-000647	0.953125	0.747559	0.945801	0.945801	0.677246	0.882324	0.843262	0.921387	0.87793	0.953125	1	0.871582	0.640625	0.880371	0.678711	0.869141	0.69043	0.943848	0.876465	0.854004	0.943848	0.837402	0.903809	0.930664	0.991699	0.924805	0.992188	1	0.907715	0.976074	0.932617	0.976562	0.97998	0.919922	0.973145	0.956543	0.991211	0.90625	0.84375	1	0.928711	1	0.976562	1	0.782715	0.884277	0.963379	0.954102	0.996582
ACH-000648	0.399902	0.0200043	0	0.188232	0.432373	0.083313	0	0.0416565	0.25	0.25	0.3125	0.128662	0.161255	0.967773	0.311523	0.721191	0.483887	0.3479	0.615234	0.192261	0.423096	0.615234	0.926758	1	0.796875	0.376709	0.73584	0.870605	0.933105	0.888672	0.833496	0.740723	0.916504	0.958496	0.979004	0.434814	0.56543	0.557617	0.360596	0.522949	0.767578	0.75	0.79541	0.666504	0.924316	0.611328	0.356201	0.377441	0.84375
ACH-000649	0.314697	0	0	0	0.0714111	0	0	0.129639	0	0.25	0.03125	0.245239	0.0826416	0.758301	0	0.619629	0.338867	0.055542	0.424561	0.32373	0.600098	0.205078	0.833496	0.833496	0	0	0.871582	1	1	1	0.609375		0.90332	1	0.947266	0	0	0.853027	0.853027	0.959961	0.769043	0.730957	0.730957	0.974121	0	0	0.208984	0.373779	0.645508
ACH-000650	0.731934	0			0	0	0	0	0.111084	0.600098	0.222168	0.830078	0.518555	1	0.370361	0.481445	0.240723		0.0952148	0.523926	0.523926	0	0.45166	0.838867	0.64209	0.740723	0.871094	0.983887	0.380859	0.983887	0	0.972168	0.120667	1	0.90625	0.241333	0.344727	0	0	0.922852	0.922852	0.922852	0	0.391357	0	0	0.0344849	0.201294	1
ACH-000651	0.931641	0.315186	0.466553	0.600098	0.653809	0.4375	0.416748	0.739258	0.758789	0.946289	0.758789	0.0625	0	0.196411	0.0172424	0.228027	0.0689697	0.0114975	0.39624	0.437988	0.552246	0.837891	0.849609	0.992676	0.973633	0.929688	0.984863	0.894043	0.939453	1	0.924316	0.972168	1	0.980957	0.971191	0.937012	0.874023	0.864746	0.973145	0.792969	0.491211	1	0.862305	1	1	1	0.635254	0.665039	0.951172
ACH-000652	0.754883	0.306152	0.163696	0.199951	0.333252	0.125	0	0		0.666504		0.302734	0.166626	0.5	0.208374	0.333252	0.208374	0.294189	0.256836	0.369873	0.602539	0.5	0.682617	0.931152	0.975586	0.634277	0.688965	0.958496	1	0.9375	0.829102	0.666504	0.958984	0.918457	0.969238	0.506348	0.45459	0.814941	0.833496	0.829102	0.414551	0.438965	0.195068	1	1	0.307617	0.474121	0.574219	0.985352
ACH-000653	0.959961	0																	0	0.00476074	1	0.00313568							0		0.00613403	1
ACH-000654			0.357178	0.357178	1	1	1	1		0.703613		1	0.0434875	1	1	1	0.652344	0.181763				1	0.432373	0.973145	0.961426	0.961426	1	1	1	1	1		1	1	0.941406					1	1	0.933105	1	1			0.964355	1	1
ACH-000655	0.460449	0.197388			0	0	0	0.0392151	0.105286	0.75	0.150024	0	0	0.945801	0	0.432373	0.432373	0.133301	0.372803	0.392822	0.392822	0.959961	0.692383	0.980957	1	0.450928	0.928711	0.964355	0.59668	0.928711	0.59668	1	1	1	1	0	0			0.966797	1	0.983398	0.350098		0.321533	0.321533	0.719238	0.95166	0.948242
ACH-000656	1	0	0.692383	0.922852		1	1	1		0.928711		1	1	1	1	1	1	1	1	1	0.861328	1	1	1	1	0.82373	0.967773	0.967773	1	1	1	1	1	1	0.90332	0.859375	0.97168			1	1	0.96875	0.96875	1			0.992188	0.93457	0.992676
ACH-000657						0.703613	0.259277	0		0.965332			0.0416565	1	0.958496	1	0					1					0.720703	0.302246		1		0.716797	1	1	1	0.965332	1			1	1	1	1		0.212158	1	0.984863	1
ACH-000659	0.758789	0.428467	0.833496	0.933105	0.521973	0.769043	0.615234	0.538574	0.769043	0.764648	0.769043	0.799805	0	0.666504	0.0666504	0.466553	0.133301		0.870605	0.555664	0.555664	0.90918	0.588379	0.632324	0.819336	0.766113	0.89209	0.945801	0.969727	0.959473	1	1	0.950684	1	0.967285	0.725586	0.960938	0.399902	0.600098	0.484863	0.939453	0.90918	0.735352	0.615234	0.833496	0.833496	0.924805	0.862305	0.961426
ACH-000660	1	0.592773	0.899902	0.899902	0.692383	0.9375	0.875	0.875	0.416748	0.25	0.360107	0.964355	0.75	0.916504	0.875	0.916504	0.916504	1	0.828613	0.742676	0.828613	1	0.967773	0.967773	0.964355	0.893066	0.86377	1	1	1	1	0.911621	0.972168	1	1	0.972168	0.972168	0.714355	0.952148	1	1	1	1	1	0.833496	0.208374	0.75	0.815918	0.950195
ACH-000661	0.0476074	0.0476074	0.0135117	0.0405273	0.104187	0.0400085	0.0599976	0.0400085	0.155151	0.0888672	0.155151	0.0606079	0.0161285	0.22583	0.0322571	0.16394	0.0645142	0	0.0882568	0.0882568	0.15686	0.227539	0.305908	0.293213	0.312012	0.141846	0.213745	0.166626	0.0991211	0.143921	0.243286	0.235352	0.318604	0.628418	0.295654	0.24585	0.155762	0.20752	0.211548	0.141357	0.161621	0.262695	0.101013	0.117004	0.0806274	0.241943	0.0675659	0.0328979	0.611328
ACH-000662	0.338867	0.0666504	0	0.357178	0	0.48877	0.288818	0.555664	0.761719	0.575684	0.523926	0.271484	0.803711	0.82373	0.470703	0.568848	0.882324	0.279297	0.5	0.652344	0.789551	0.988281	0.709961	0.859375	0.844727	0.711426	0.73291	0.902832	0.799805	0.754883	0.686035	0.887207	0.921875	0.870605	0.95752	0.308594	0.567871	0.87793	0.87793	1	1	1	1	0.981934	1	1	0.668457	0.293457	0.986328
ACH-000663
ACH-000664	0.888672	0.244385	0.199951	0.418213	0.181763	0.363525	0.54541	0.63623	0.47998	0.583496	0.680176	0.4021	0.375	0.897461	0.549805	0.769043	0.825195	0.421143	0.762695	0.762695	0.915039	0.458252	0.349609	0.902832	0.928711	0.528809	0.95752	0.895996	0.958984	0.875	0.444336	0.358398	0.943848	1	0.98877	0.384521	0.428467	0.486572	0.5	1	0.958496	0.708496	0.666504	0.95459	0.958496	0.520996	0.487305	0.478271	0.990723
ACH-000665	0.030304	0	0.0380859	0.1604	0.0882568	0	0	0	0.125	0.242432	0.0588379	0.0112381	0	0.0222168	0	0.0224762	0.0108719	0.03125	0.198364	0.119995	0.151978	0.294922	0.0916138	0.608887	0.310547	0.128784	0.724609	0.326904	0	0.375	0	0.372559	0.854492	0.891113	0.63623	0.0439453	0.186768	0.055542	0.0571289	0.399902	0.51416	0.202881	0.328613	0.606934	0.469482	0.428467	0.055542	0.0628662	0.970215
ACH-000666										1												1																1	1									1
ACH-000667	0.10907	0.0892944	0	0	0	0	0	0.360596	0.1875	0.0750122	0.5625	0.23999	0.353027	0.372559	0.353027	0.0196075	0.274414	0	0	0.0163879	0.0163879	0.0166626	0.558594	0.706055	0.795898	0.640137	0.575195	1	0.375	1	0.34375	0.125	0.565918	0.773438	0.490479	0	0			0.324219	0	0.473633	1	1	1	0.464355	0.266113	0.522461	0.860352
ACH-000668	0.225464	0.0323792	0.280518	0.393311	0.157349	0	0	0.0793457	0.238037	0.375	0.208374	0.132568	0.0822754	0.32666	0.0384521	0.0986938	0.0943604	0.0674438	0.0689697	0.0588379	0.201172	0.391602	0.189697	0.387939	0.329834	0.20752	0.439209	0.483887	0.36792	0.390625	0.102417	0.244263	0.672852	0.94043	0.84375	0.156372	0.213989	0.234009	0.153809	0.407471	0.351807	0.327393	0.407471	0.553223	0.496582	0.415527	0.318848	0.266846	0.773926
ACH-000669	0.975098	0.75	0.740723	0.868164	0.894531	0.904785	0.761719	0.600098	1	0.75	1	0.677246	0.758789	0.965332	0.965332	1	0.965332	0.65625	0.848633	0.681641	0.894043	0.975586	0.980957	0.961426	0.959961	0.777832	0.897461	1	1	1	0.966797	0.931641	0.951172	1	0.975098	0.773438	0.830078	0.799805	0.700195	1	1	1	0.611328		1	0.862305	0.71582	0.977539	0.953125
ACH-000670	0.729492	0.243286	0.5	0.555664	1				0.916504	0.8125	0.416748	0.839844	0.541504	0.979004	0.520996	0.979004	0.625	0.814941	0.90918	0.90918	0.90918	0.694336	1	1	1	1	1	1	0.875	0.90918	0.8125	1	1	1	0.90918	0.710449	0.710449			0.950195	1	1	0.799805	0.45459	0.815918	0.973633	0.62793	0.76709	1
ACH-000671	1	0.0263214	0	0.240723	0.799805					0.628418		0	0	0.0140839	0	0.0281677	0	0	0.083313	0.083313	0.0999756	0.950195	0.258057	0.967773	1	0.82373			0.357178		0.285645		0.818359	0.63623	0.428467	0.612305	0.775391	0	0					1	0.710938	0.333252	0.307617	0.426758	0.771484
ACH-000672	1	0							0	1	1		1	1	1	1	1	0				0.0375061			1	1	1	0.989258		1		0				0	0			1	0	0.40918	0.40918				0	0	0.993164
ACH-000674			0	0	0	0	0	0										0.0625	0	0	0	0.952148	1	1	1	0.384521	1	1	0.928711	1	0	1	1	0.710449	1	0	0.933105	1	1						1	1	0.550781	0.586426	0.68457
ACH-000675			0	0	0					0												0			0.99707	0.99707							1	1	0.973145
ACH-000677	0.976562	0.883789	1	1	1	0.300049	0.75	0.75	0.678711	0.666504	0.606934	0.322021	0.666504	0.969727	0.95459	0.984863	0.742188	0.856934	0.744629	0.915039	0.95752	1	0.764648	1	1	0.94043	1	0.989746	1	0.907227	1	1	0.888672	1	0.927246	0.973633	0.973633	0.526367	0.736816					0.967773	0.866699	1	0.772949	0.725586	1
ACH-000678	0.222168	0	0.204102	0	0.00735474	0	0.272705	0	0.814941	0.111084	0.555664	0.22876	0.0400085	0.282227	0.0400085	0.145142	0.0400085	0.15625	0.587402	0.525879	0.480957	0.65918	0.21875	0.615234	0.796875	0.224609	0.600098	1	0.600098	1	0.439941		0.643066	0.952148	0.931641	0.0999756	0.0999756	0.291748	0.5	0.643066	0.0714111	0.714355	0.714355	0.263184	0.466553	0.8125	0.160034	0.189697	0.952148
ACH-000679	0.592773	0.407471	1	1		0.43335	0.633301	0		0.944336		0.0845337	0	0.300049	0	0	0.0422668	0.0285645	0.5625	0.5625	0.4375	0.960938	0.244873	1	0.861328	0.399902	0.558105	0.872559	1	1	1	1	0.643066	0.989746	0.989746	0.738281	0.94043	1	0.577148	1	1	0.0999756	1	0.0769043	1	0.941406	0.842285	0.787109	1
ACH-000680	0.964844	0.876953	0.894531	0.896484	0.63623	0.571289	0.5	0.769043	1	0.575195	1	0.0235291	0.0377502	0.115356	0.0566101	0.0377502	0.0188751	0	0	0.078125	0.109375	0.842285	0.814453	0.927734	0.95752	0.893555	1	1	0.985352	1	0.92627	0.960938	0.978027	0.966797	1	0.938965	0.916504	1	0.894531	1	0.856934	1	0.964355	0.78125	1	0.757812	0.388916	0.803711	1
ACH-000681	0.775879	0.327637	0.689453	0.792969	0.962402	0.466553	0.22583	0.0689697	0.727051	0.854492	1	0.503906	0.844238	0.974121	0.818359	0.831055	0.584473	0.904785	0.833496	0.827637	1	0.833496	0.911621	0.96582	0.909668	0.900879	0.938965	0.859863	0.953613	0.910156	0.969238	0.946289	0.98584	0.97168	0.906738	0.704102	0.647949	1	1				0.75	0.53125	0.958496	0.958496	0.821777	0.859863	0.98291
ACH-000682	1	0.85791	0.592773	0.675781	0.901855	0.885254	0.655273	0.745605	1	0.95166	1	0.783203	0.785645	0.960938	0.875	0.871582	0.707031	0.726562	0.858398	0.868164	1	0.894531	0.804688	0.891113	0.874023	0.880371	0.808105	0.927246	1	0.894043	1	0.924316	0.979004	0.872559	0.889648	0.927246	0.90918	1	0.829102	1	0.993652	0.905273	0.743652	0.803711	0.897949	1	0.621582	0.970215	0.996094
ACH-000683	0.441162	0.161743	0.214233	0.456055	0.453125	0.533203	0.266602	0.272705	0.360107	0.285645	0.439941	0.239624	0.241943	0.409912	0.0161285	0.458984	0.0645142	0	0.0183411	0.0458679	0.00917053	0.924805	0	0.51416	0.602051	0.363525	0.836914	0.930664	0.766113	0.950684	0.915039	1	1	1	0.808105	0.890625	0.549805	0.285645	0.758789	0.762695	0.465576	0.771973	0.423828	0.717285	0.29834	0.438477	0.495117	0.507324	0.994141
ACH-000684	0.5625	0.125	0.199951	0.640137	0.285645	0.199951	0.199951	0.0666504	0.272705	0.055542	0.0908813	0.160034	0.150024	0.300049	0	0.300049	0.199951	0.0714111	0.405518	0.216187	0.405518	0.928711	0.911621	0.970703	0.931152	0.586426	0.799805	0.879883	1	0.839844	1	1	1	1	0.959961	0.759766	0.720215			0.63623	0.583496	0.5	0.75	0.9375	0.875	0.6875	0.714355	0.768066	1
ACH-000685	0.195435	0.022995	0	0.0908813	0.0800171	0.25	0.25	0.29541	0.125	0.222168	0.3125	0.18042	0.0853882	0.3125	0	0.182983	0	0.108704	0.0326233	0.0326233	0.130493	0.418945	0.259766	0.415527	0.61377	0.356445	0.571289	0.683105	0.534668	0.722656	0.166626	0.579102	0.896973	0.989746	0.855469	0.27002	0.389893	0.533203	0.227295	0	0	0.055542	0.611328	0.364746	0.315674	0.243286	0.29834	0.23291	0.880859
ACH-000686	0.0810547	0	0	0.65625	0	0.030304	0.0606079	0.129028	0.269287	0.181763	0.230713	0.305176	0.0520935	0.395752	0.0520935	0.135376	0.09375	0.09375	0.27417	0.193604	0.278809	0.229492	0.29126	0.412598	0.304932	0.256104	0.576172	0.615234	0.594727	0.738281	0.243286	0.538574	0.418701	0.952148	0.785645	0.367188	0.506348	0.5	0.214233	0	0	0	0.941406	0.307617	0.135132	0.108093	0.206909	0.144287	1
ACH-000687	0.975586	0.585449	0.422119	0.822266	0.579102	1	0.666504	0.533203	0.90918	0.893066	1	0.345459	0.871582	1	0.94873	1	0.94873	0.333252	0.870117	0.831055	0.986816	1	0.927246	1	0.897949	0.958984	0.952148	0.976074	0.98291	0.952148	0.98291	1	1	0.942383	0.945312	0.666504	0.777832	1	0.888672	0.961426	0.964355	0.964355	0.777832	0.952148	1	0.899902	0.493164	0.983398	0.971191
ACH-000688			0.431885	0.86377	0.75	0.216187	0.135132	0.216187	0.966797	0.575195	0.600098	0.732422	0.083313	0.541504	0	0.208374	0.25	0.275879	0.436523	0.67627	0.732422	0.463379	0.537109	1	0.97998	0.839844	1	1	0.964355	0.875	0.464355	0.944336	0.958496	0.979004	0.8125	0.736816	0.684082	0.882324	0.882324	1	1	1	0.5	1	0.5	0.136353	0.512695	0.573242	1
ACH-000689	0	0	0.5	0.777832		0	0.0769043	0		0.538574		0.363525	0.0526428	0.973633	0.105286	0.0526428	0.605469		0.5	0.25	0.75	1	0.799805	0.971191	1	0.950195	0.974121	0.897461		0.924805		0.75	0.833496	0.833496	0.806641	0.323486	0.411865	0.555664	1					0.90918	0.333252	0.238037	0.547852	0.902344	1
ACH-000691	1	0.709473	0.958496	0.9375	0.777832				0.733398	0.933105	1	0.803711	0.722168	0.902832	0.859375	0.957031	0.95752	0.922852	0.919922	0.916504	1	1	0.914062	0.941895	0.977051	0.977051	0.959473	0.986328	0.974121	0.811035	0.94873	0.980957	1	0.985352	0.956055	1	1			0.833496	0.916504	0.916504	0.90918	0.879883	1	0.952148	0.724609	0.944824	0.946777
ACH-000692	0.394043	0.0908813	0.192261	0.5	0	0	0	0	0.015625	0.119019	0.015625	0.00549316	0	0.0360413	0	0	0	0.0243835	0	0.0087738	0.0357056	0.0526428	0.40918	0.95459	0.90918	0.484863	0.915527	0.847168	0.465332	0.57666	0.101013	0.580078	0.930176	0.953125	0.942383	0.156616	0	0.314209	0.25	0	0.189209	0.189209	0.324219	0.524902	0.252441	0.281494	0.583496	0.868652	0.866699
ACH-000693			1	1	0					0.666504		1	0.543945	0.546387	0	0.541992	0.0043869					1					0.989746	1	1	1	1		0.990723	1	0	0.646484	1			1	1	1	0.991211		0.986328	1	0.119995	0.602051
ACH-000694	0.460693	0.247192	0.245239	0.230713	0.259277	0.0526428	0.0526428	0.315674	0.666504	0.899902	0.666504	0.166626	0.136353	0.511719	0.136353	0.272705	0.20459	0.0454407	0.417969	0.208984	0.582031	0.819824	0.70459	0.960938	0.850586	0.637695	0.956543	0.985352	1	0.941895	0.883301	0.744141	0.979004	1	0.949707	0.884277	0.84082	0.592773	0.629395	0.935547	0.935547	0.967773	0.90332	0.913574	0.774414	0.838867	0.496338	0.77832	0.933105
ACH-000695	0.862305	0.275146	0.703125	0.671875	0.363525	0.5	0.346191	0.577148	0.619141	0.916504	0.714355	0.0912476	0.349121	0.54541	0.36499	0.263428	0.101074	0.294189	0.819824	0.423828	0.762695	0.539062	0.76123	0.832031	0.908691	0.646973	0.822754	0.936035	0.771973	0.874023	0.728027	0.780273	0.97998	1	0.960938	0	0			0	0.75	0.75	0.75	1	0.787109	0.819824	0.165771	0.845703	0.967285
ACH-000696	0.830566	0.305176	0.51709	0.677734	0.527832	0.555664	0.407471	0.692383	0.818359	0.918457	0.583496	0.760254	0.605957	0.939453	0.788086	0.818359	0.424316	0.633301	0.754883	0.52832	0.773438	0.734863	0.981934	1	0.912598	0.854492	0.938477	0.95166	0.884766	0.939941	0.660156	0.942383	1	0.981934	0.982422	0.830078	0.788574	0.973145	0.777832	1	1	1	0.888672	1	0.882324	1	0.396729	0.950195	0.941895
ACH-000697	0.962891	0.518555	0.666504	0.733398	1	0.714355	0.571289	0.444336	0.54541	0.285645	0.90918	0.818359	0.608887	0.869629	0.869629	0.913086	0.869629	0.799805	0.922852	0.922852	0.922852	0.952148	0.961426	0.846191	0.952148	0.779785	0.930176	0.976562	0.959961	0.904785	0.959961	1	0.933105	0.933105	0.866699	0.866699	0.899902	0.90918	0.363525	0.90918	1	1	1	0.9375			0.899902	0.799805	0.979004
ACH-000698	1	1	0.976074	0.80957	0.666504	0.799805	0.799805	0.199951	0.875	0.600098	0.875	1	0.850098	1	1	1	1	0.956543	0.666504	0.412598	0.682617	0.826172	1	1	0.895508	1	0.945801	1	1	1	0.97998	0.970703	1	1	0.973633	1	1							1			0.985352	1	0.850586
ACH-000699	0.70752	0.341553	0.589844	0.87793	0.785645	0.600098	0.353027	0.457031	0.8125	0.787109	0.770996	0.797852	0.718262	0.97168	0.845215	0.873047	0.859375	0.388916	0.566406	0.926758	0.759277	0.886719	0.977539	1	1	0.824219	0.831543	0.938965	0.827148	0.95166	0.950684	0.879883	1	0.983398	0.93457	0.929688	0.97168	1	1	0.868164	0.980957	0.980957	0.962891	1	0.894531	0.842285	0.628906	0.834961	0.925781
ACH-000701	0.666504	0.282227	0.0899048	0.156616	0.474365	0.307617	0.410156	0.0270233	0.727051	0.859863	0.856934	0.279297	0.237305	0.788086	0.296631	0.355957	0.203491	0.0968018	0.344482	0.556641	0.54541	0.589355	0.899902	1	0.730469	0.626953	0.791016	0.985352	0.702148	0.793945	0.677246	1	0.983398	1	0.935547	0.716309	0.702637	0.717773	0.620117	0.460449	0.602539	0.518066	0.464355	0.571289	0.212158	0.302979	0.460938	0.460449	0.983887
ACH-000702	0.714355	0.0357056	0.54834	0.709473	0.792969	0.17395	0.130493	0.217407	0.799805	1	0.933105	0.764648	0.708496	1	0.916504	0.791504	0.708496	0.684082	0.643066	0.357178	0.357178	0.788086	0.351318	0.486572	1	0.512207	0.888672	0.966797	1	0.866699	0.818359	0.3479	0.976074	1	1	0.700195	0.692383	0.724121	0.758789	0.63623	1	1	1	1	0.133301	0.533203	0.516113	0.95752	1
ACH-000703			1	1	1				0.583496	0.888672	1	0.75	0.399902	0.971191	0.285645	0.799805	0.399902		0.935547	0.967773	0.967773	0.952148	0.913574	1	0.984375	0.90625	0.960938	0.865234	1	1	1	1	0.990234	1	0.971191	1	1	1	1	1	1	1	1		0.967773	0.967773	0.814453	0.958008	0.928711
ACH-000704	0.95459	0.95459	0.862305	1	1					1		0.692383	0.625	1	0.125	0.910645	0.321533		0.588379	0.882324	0.82373	0.931152	1	1	0.950195	0.950195	0.939941	0.865234	1	1	1	1	0.95459	1	1	1	1	0.966797	0.966797					1	0.43335	0.700195	0.67041	0.891113	0.894531
ACH-000705	0.609863	0.365967	0.640137	0.399902	0.552734	0.353027	0.294189	0.294189	0.799805	0.666504	0.466553	0.428467	0.791504	0.791504	0.75	0.541504	0.416748	0.708496	0.490967	0.73584	0.868164	0.922852	0.761719	0.80957	0.926758	0.926758	0.872559	0.916504	0.883301	0.916504	0.866699	0.944336	0.970703	0.941406	1	0.936523	0.682617	0.555664	1	1	0.952148	0.666504	0.714355	0.875	0.761719	0.856934	0.615234	0.934082	0.986328
ACH-000706	0	0.0612183	0.315674	0.383057	0.217407	0.405518	0.0270233	0.189209	0.916504	0.540527	0	0.027771	0.256348	0.914551	0.452881	0.594727	0.170898	0	0.142822	0.418945	0.504883	0.631348	0.84082	0.712402	0.910645	0.866211	0.983398	0.90918	0.766602	0.503906	0.75	0.6875	0.98877	0.87793	0.888672	0.848633	0.732422	0.0322571	0.354736	0.426758	0.17334	0.802734	0.5	0.40918	0.655273	0.792969	0.327881	0.728516	0.894531
ACH-000707			1	1	1	1	0.199951	1		1		1	0.706055	1	1	1	1	1	0.941406	1	1	1	0.8125	1	1	1	0.982422	0.876953	1	1	0.75	1	1	1	0.986328	0.983398	0.983398	1	1	1	1	1	0.9375	1	1	1	0.915039	1	1
ACH-000708	0.976562	0.976562	1	1	0.856934	0.976562	0.883789	0.953613	0.928711		0.910645		0	0	0	0	0	0	0	0	0	0.976562	0.95459	0.727051	1	1	0.931152	0.966797		0.966797		0.985352	0.976562	0.976562	0.976562	1	1								0	1	0.322021	0.706543	1
ACH-000709	1	0.157837	0.25	0.916504	0.148193	0.846191	0.846191	0.52002	0.75	0.947266	1	0.974121	0.815918	0.894531	0.315674	0.552734	0	0.43335	0.428467	0.285645	0.30957	0.740234	0.913086	1	1	0.703613	1	1	1	1	0.916504	0.853027	1	1	0.976074	0.833496	0.854004	0.952148	0.904785	0.879883	0.980469	0.980469	0.529297	1	0.928711	0.214233	0.662598	0.989258	0.977051
ACH-000710	0.723145	0.922852	0.785645	1	0.875	1	0.888672	0.666504	0.600098	0.819824	1	0.0285645	0	0.101135	0.0224762	0.0337219	0	0	0.759277	0.810059	0.72168	0.802734	0.853516	0.926758	0.986816	0.893555	0.89209	0.945801	1	0.973145	0.740723	0.595703	0.896484	0.977051	1	0.568359	0.547363	0.931641	0.90918	0.916504	0.958496	0.913086	0.666504	1	0.956543	0.673828	0.438965	0.679199	0.983887
ACH-000711
ACH-000712					0.853027	1	0.199951	1				0.941406	0.738281	0.976074	0.976074	0.976074	0.761719	0	1	1	1		0.930176	0.930176	1	1	1	0.959961		1		1	0.972168	1	0.972168									0.875	1	1	0.962891	0.876953	0.583496
ACH-000713	0.740723	0.39502	0.476807	0.895508	0.581543	0.142822	0.107117	0.111084	0.653809	0.666504	0.653809	0.178345	0.265137	0.64209	0.168701	0.304932	0.192749	0.133301	0.538574	0.612305	0.751953	0.390381	0.637695	0.827148	0.976562	0.922363	0.896484	0.934082	1	0.922852	0.818359	0.774414	0.931641	0.986328	0.959473	0.416748	0.366699	0.428467	0.850098	1	0.9375	0.8125	1	0.922852	0.351562	0.355469	0.303955	0.711914	0.972168
ACH-000714	0.971191	0.333252	0.611816	0.76123	0.588379	0.919922	0.0400085	0.439941	0.581543	1	0.837402	0.581543	0.82373	0.882324	0.82373	0.706055	0.8125	0.392822				0.80957	1	1	0.912109	0.594727	1	1	1	1	1	1	0.950195	0.975098	0.772949	0.941406	0.941406							1	1	1	0.691895	0.801758	1
ACH-000715	0.799805	0.0400085	0	0	0.537109	0.0370483	0.0370483	0.0370483	0.0952148	0.366699	0.681641	0.0666504	0.022995	0.267334	0.04599	0.0574646	0	0	0.728516	0.742676	0.885742	0.928711	0.1875	0.40625	0.282471	0.482422	0.541504	0.844238	0.172363	0.519531	0.178589		0.694336	0.833496	0.916504	0.0267792	0.0354004			0	0.083313	0.640137	0.560059	0.961426	0.0103073	0.0104141	0.247192	0.0625	0.855957
ACH-000716	0.577637	0.399902	0.484863	0.484863	0.181763				0.666504	0.897461	0.600098	0.474609	0.448975	0.591797	0.612305	0.428467	0.265381	0.428467	0.753906	0.90625	0.875	0.612793	0.530762	0.914551	1	0.833496	0.9375	0.958496	1	0.979004	0.555664	0.962402	0.895996	0.971191	0.981445	0.686523	0.641602	0.689453	0.689453	0.969727	1	1	1	0.63623	0.5	0.388916	0.282227	0.638672	0.686035
ACH-000717	1	0.683594	0	0.655273	0.191528	0.529297	0.793945	0.706055	0.985352	0.297363	0.985352	0.3125	0.160889	0.758789	0.04599	0.792969	0.287354	0	0.0666504	1	0	1	1	0.883789	0.976562	0.767578	1	1	1	0.983887	1	1	0.932617	1	1	1	0.98877	0.797852	0.976074	1	1	1	1	0.70166	1	0.64502	1	0.699219	1
ACH-000718	1	0.947266	0.285645	1		1	0.899902	0.600098	0.875	0.965332	0.875	0.905762	0.966797	0.966797	1	0.950195	1	0.730957	0.906738	0.975586	1	0.917969	0.945801	0.989258	1	0.716797	0.986816	0.987305	0.947266	0.936523	1		1	0.936035	1	1	0.989258	1	1	1	1	1	1		0.774414	0.741699	0.75	0.983398	1
ACH-000719	0.153809	0	0	0.133301	0.428467	0	0.040802	0.081604	0.173096	0.272705	0.25	0.214233	0.324219	0.89209	0.594727	0.459473	0.378418	0.125	0.346191	0.538574	0.538574	0.806641	0.600098	0.899902	0.727051	0.363525	0.56543	0.5	0.294189	0.608887	0.171387	0.694336	0.666504	1	1	0.0384521	0.399902		0	0.666504	0.583496	0.625	0.625	0.394775	0.428467	0.214233	0.546875	0.468018	0.605957
ACH-000720	0.0797119	0	0.0324707	0.0908813	0.0109863	0.0196075	0.0784302	0.23999	0.129883	0.102539	0.0769043	0.394287	0.0392151	0.226685	0.111084	0.145752	0.0980225	0.0856934	0.331299	0.435791	0.681641	0.483398	0.259766	0.52832	0.791016	0.423096	0.697266	0.825684	0.939453	0.773926	0.484619	0.507324	0.954102	0.967285	0.895508	0.246582	0.224243	0.549316	0.425049	0.666504	0.666504	0.541504	0.472168	0.655762	0.487061	0.217896	0.481934	0.23877	0.831543
ACH-000721	0.915527	0.295654	0.113647	0.227295	0.279053	0.130493	0.130493	0.130493	0.280029	0.478271	0.439941	0.544434	0.359375	0.78125	0.796875	0.968262	0.578125	0.0400085	0.448242	0.526367	0.631348	0.318848	0.700195	0.924805	0.979492	0.577148	0.803223	0.983398	0.985352	0.966797	0.811523	0.382324	0.898438	1	0.914062	0.765625	0.921875	0.973633	0.868652	0.952148	0.856934	0.952148	0.571289	0.965332	0.727051	0.666504	0.34082	0.757324	0.964355
ACH-000722	0.833496	0.125	0.461426	0.641113	0.666504	0.466553	0.300049	0.689453	0.696777	0.827637	0.878906	0.0133362	0.0499878	0.0249939	0.0249939	0.0499878	0	0.0370483	0.0243835	0	0.0487671	0.540039	0.207764	0.714355	0.702148	0.44043	0.568848	0.610352	0.566406	0.474609	0.416748	0.688477	0.812988	0.900879	0.90332	0.438965	0.329346	0.399902	0.333252	0.818359	0.67627	0.617676	0.588379	0.871582	0.224976	0.324951	0.0975342	0.116577	0.938477
ACH-000723	0.365967	0	0.439941	0.560059	0.25	0.206909	0.206909	0.206909	0.764648	0.846191	0.706055	0.0845337	0.0861816	0.310303	0.0344849	0.224121	0.0714111	0.0952148	0.581543	0.232544	0.395264	0.365479	0.780273	0.804688	0.755371	0.710938	0.899902	0.838867	0.972168	0.806641	0.472168	1	0.899902	0.933105	0.721191	0.481445	0.604004	0.526367	0.315674	0.952148	0.666504	0.80957	0.714355	1	0.300049	0.0999756	0.449219	0.568359	0.979004
ACH-000724	0	0			0								0	0	0	0.00507736	0		0	0	0		0	0	0	0						1						0.00304031	0.00312424	0	0	0	0					0
ACH-000725	0.0588379	0.055542	0	0	0				0.166626	0.419434	0.333252	0.0615234	0.105286	0.238037	0.0908813	0.285645	0.0908813	0	0.199951	0.142822	0.0370483	0.395752	0.0645142	0.105286	0.111084	0.305664	0.222168	0.310303	0.5	0.482666	0.413818	0	0.394043	0.45459	0.242432	0.209839	0.283936	0.0999756	0.0526428	0.600098	0.119995	0.115356	0.107117		0.0999756	0.0999756	0.210571	0.191162	0.740723
ACH-000726	0.138916	0.083313	0.10907	0.291016	0.0526428	0.0750122	0	0.0750122	0.5	0.206909	0.491211	0.13562	0.0588379	0.372559	0.0784302	0.0980225	0.0588379	0	0.133301	0.109619	0.273926	0.467529	0.372559	0.725586	0.59375	0.375	0.694336	0.611328	0.600098	0.333252	0.418213	0.513672	0.731445	0.895508	0.895508	0.240479	0.278564	0.242432	0.030304	0.0999756	0.197144	0.295654	0.253418	0.311035	0.313721	0.470703	0.202881	0.110229	0.950195
ACH-000727	0.0632935	0.0365906	0.205933	0	0	0.160034	0.199951	0.25	0.875	0.666504	0.199951	0.229492	0.293701	0.681641	0.13562	0.361572	0.0348816	0	0.28125	0.15625	0.140625	0.277832			0.777832	0.555664	1	1	0.5625	0.888672	1	0.86377	1	1	1	1	0.818359							0	0.19043	0.69043	0.162354	0.216431
ACH-000728	1	1	1	1	0.94873	0.826172	0.695801	1	1	0.974121	1	0.54834	0.989746	0.989746	0.989746	0.937988	1	0.90332	0.952148	0.523926	0.952148	0.967773	1	1	0.986328	1	0.872559	1	1	1	1	1	0.95459	0.95459	0.583496	0.9375	0.9375	1	1	1	1	1	1	0.971191	0.922852	0.961426	1	0.953613	1
ACH-000729	1	1	0.916504	0.916504	0.318115	0.5	0.5	1		1		1	0.362793	0.598145	0.372559	0.941406	0.353027	0.933105	1	1	1	0.990234	0.938965	0.775391	1	1	0.946289	0.981934	1	1	1	1	1	0.989258	0.989258	1	1			1	1	1	1		1	1	1	1	1
ACH-000730	0.0461426	0.0153809	0.0983887	0.114746	0.0422668	0.027771	0.138916	0.027771	0.027771	0.314209	0.027771	0.142822	0.0307617	0.136353	0	0.046875	0.015152	0.0769043	0.141235	0.129395	0.0941162	0.508301	0.263184	0.368408	0.55957	0.30957	0.302002	0.489746	0.45752	0.404053	0.163086	0.285645	0.646484	0.951172	0.69873	0.178589	0.223267	0.0968018	0.133301	0.130005	0.297119	0.346436	0.168335	0.506836	0.0789185	0.179443	0.168335	0.132202	0.759766
ACH-000731	0.807617	0.807617	0	0.191528	0.0297089	0.433838	0.62793	0.306641	0.938965	1	0.879883	0.711914	0.269775	0.893066	0.259766	0.422852	0.570801	0	0.398438	0.218018	0.218018	0.227661	0.467773	1	0.59668	0.484863	1	0.905273	1	1	1	0.560547	0.993652	1	0.993652	0.903809	0.865234			1	1	1	1	0.142822	1	1	0.525391	0.857422	1
ACH-000732	0	0	0	0	0	0	0	0.222168	0.285645		0.285645	0.112915	0	0.0163879	0	0	0	0	0.0588379	0.0588379	0.0625	0	0.5	0.8125	0.193604	0.0968018	1	1	0.8125	1	0.9375	1	1	1	0.555664	0.111084	0.133301	0	0.0740967	0	0	0	0	0.736816	0.535645	0.535645	0.0571289	0.409668
ACH-000733	0.213135	0	0.426025	0.426025	0.177246	0	0	0.256836	0	0.074646	0	0.344727	0.428467	0.964355	0.428467	0.461426	0.285645	0.0227203	0.484375	0.487305	0.740723	0.452393	0.492432	0.984863	0.663574	0.0545349	1	1	0.888672	1	0.0200043	0.8125	1	1	1	0	0	0.18457	0	0.97998	0.959961	0.959961	0.47998	0.818359	0.965332	0.310303	0.435059	0.661621	0.991211
ACH-000734	1	0.448486	0.457031	0.847656	0.125	0.54541	0.467529	0.402588	0.540039	0.604004	0.620117	0.97998	0.526855	0.946777	0.900879	0.946777	0.85498	0.199951	0.305664	0.419434	0.741699	0.80127	0.916504	1	0.930176	0.776367	0.773438	0.979492	0.983887	0.989746	0.870117	0.958008	1	0.993164	0.847656	0.799805	0.873535	0.964844	0.912109	1	0.976562	0.860352	1	0.94873	0.963867	0.602539	0.333252	0.780273	1
ACH-000735	0.0444336	0.0109863	0.04599	0.202271	0.121216	0.015625	0.078125	0.111084	0.481445	0.414551	0.35791	0.0423584	0.0405273	0.375	0.0274048	0.0946045	0.0540466	0	0.0740967	0.0648193	0.1604	0.711914	0.562988	0.495117	0.755371	0.586426	0.770996	0.868652	0.820801	0.838379	0.833496	0.688965	0.877441	0.979004	0.893555	0.648438	0.780273	0.16394	0.112915	0.15625	0.4375	0.6875	0.53125	0.483887	0.101135	0.146118	0.521973	0.280518	0.929199
ACH-000736	0.987305	0	0.51416	0.546387	0.537109	0.496338	0.121399	0.692871	0.993164	0.850586	0.875	0	0.0150757	0.0871582	0.0401917	0.0908813	0	0.0678101	0.0776978	0.150513	0.330078	0.987305	0.661621	0.661621	1	0.580566	0.90918	0.991211	0.922363	0.991211	0.851562	1	0.895996	0.967773	0.993652	0.601074	0.522949	0.64502	0.384521	1	0.697754	0.947754	0.75	0.781738	0.600098	0.557129	0.533691	0.426025	0.916016
ACH-000737					1								1	1	1	1	1					1																									1		1
ACH-000738	0.293213	0.120667	0.270752	0.479248	0.137939	0	0	0.227295	0.0800171	0.131592	0.0800171	0.320801	0.204102	0.632812	0.326416	0.550781	0.122437	0.363525	0.208984	0.151489	0.197021	0.430664	0.383545	0.397217	0.379395	0.310303	0.447266	0.615234	0.720215	0.461426	0.291748	0.646973	1	0.973145	0.743652	0.214233	0.428467	0.219482	0.175049	0.423096	0.423096	0.423096	0.423096	0.941406	0.395264	0.186035	0.329834	0.342529	0.987793
ACH-000739	0	0	0.130493	0.130493	0	0	0	0		0.952148		0	0	0.5	0.5	0.600098	0.5	0	0	0	0	0.40918	0.291748	0.291748	0	0.0322571	0	0.579102	0	0.263184	0		0.0384521	1	0.692383	0	0			0	0	0	0		0.764648	0.235352	0.384521	0.493164
ACH-000740	0.925781	0.490967	0.754883	0.833496	0.623047	0.755859	0.463379	0.390137	0.868652	0.837402	0.605469	0.561035	0.691406	0.941406	0.646973	0.911621	0.853027	0.5	0.856934	0.841309	0.904785	0.879883	0.931641	0.943848	0.921387	0.887695	0.929199	0.988281	1	0.988281	0.843262	1	1	0.960449	1	0.912109	0.966797	0.646973	0.764648	0.974121	1	1	0.974121	0.969727	0.681641	0.95459	0.494141	0.791504	0.945801
ACH-000741					0	0	0	0.0416565	0.0588379		0.0588379	0	0	0.0714111	0	0						0.107117	0.0333252	0.03125	0.0800171	0.0769043			0.289795		0.0289917	0								0	0.030304	0	0.0285645	0.0219727	0.0454407	0	0.0999756	0.00537491	0.0333252
ACH-000742	1	0			0.856934	0.774414	0.78125	0	0.771484	0.75	0.771484	0.0377502	0.285645	0.63623	0.981934	0.690918	0	0.0232544	0	0	0.162842	0.150024	0.129883	0.24353	0.695801	0.695801	0.538574	0.333252	0.0434875	0	0.0434875	0.792969	0.926758	1	1	0.323975	0.197144	0.658691	0.350098	0	0	0.0322571	0.46875	0.0454407	0.97998	0.5	0.4375		0.30957
ACH-000743	1	0.865234	0.816895	0.950195	0.790527	0.883789	0.813965	0.880859	0.86377	0.829102	0.860352	0.904297	0.696777	1	0.742188	0.924316	0.757812	0.846191	0.95752	0.957031	0.98584	0.986816	0.982422	0.98291	1	0.956543	0.830566	0.98291	0.986328	1	0.918945	0.980469	0.933105	0.933105	0.980957	0.773926	0.878418	0.870605	0.981934	0.9375	1	1	1	0.866699	0.875	0.958496	0.791992	0.967285	0.93457
ACH-000744	0.508789	0.157837	0.162476	0.185181	0.133301	0.277832	0.166626	0.1875		0.608887	0.25	0.0652466	0.145508	0.565918	0.259277	0.462891	0.462891	0.117676	0.258545	0.336182	0.286865	0.245361	0.506348	0.426758	0.919434	0.620605	0.899902	0.963867	0.872559	0.770996	0.654785	0.319092	0.60791	0.930664	0.643066	0.426514	0.5	0.799805	0.806641	0.928711	1	0.25	0.533203	0.706055	0.29834	0.228027	0.0540466	0.376221	0.775879
ACH-000745	0.428467	0.238037	0.579102	1						0.461426		0.866699	0.465088	0.976562	0.790527	0.790527	0.62793		0.730957	0.577148	0.846191	0.912109	1	1	0.973633	0.947266	1	0.847656	1	1	0.470703	0.847656	1	0.916504	0.916504	0.897949	0.979492	0.600098	1	1	1	0.0999756	1		1	1	0.799805	0.887695	1
ACH-000746	0.589355	0.428467	0.291748	0.270752	0.0714111	0	0.199951	0.199951	0.0999756	0.269287	0.199951	0.43335	0	0.555664	0.361084	0.416748	0.333252	0.25	0.382324	0.353027	0.382324	0.464844	0.384521	0.666504	0.580078	0.542969	0.564453	0.63623	0.491211	0.575684	0.526367	0.411865	0.853516	0.933105	0.853516	0.426758	0.486816	0.461426	0.307617	0.424316	0.45459	0.46875	0.424316	0.321533	0.360107	0.23999	0.495605	0.540527	0.768555
ACH-000747			1	1														0									1	1		1																		0
ACH-000748	0.0689697	0.0689697	0.206909	0.0112381	0.117126	0	0.00662231	0.00666809	0.711914	0.333252	0.411865	0	0	0.65918	0.0222168	0.577637	0.222168	0	0.56543	0.246338	0.231934	0.321045	0.0568237	1	0.630859	0.630859	0.456299	0.346191	0.28833	0.384521	0.19873	0.805664	0.52832	0.92041	0.977539	0.600098	0.600098	0.125	0.125	0.0137024	0.145874	0.159668	0.0139847	0.673828	0.234741	0.236816	0.158447	0.139771	0.77832
ACH-000749	0.648438	0.162109	0.861328	0.888672	0.528809	0.482666	0.518555	0.259277	0.589844	0.666504	0.692383	0.45752	0.321533	0.876953	0.245605	0.856934	0.192993	0.600098	0.60791	0.82373	0.588379	0.894531	0.625	1	0.981445	0.777832	0.85498	0.698242	0.838867	0.587402	0.40332	0.92627	0.95166	0.85498	0.888672	0.17981	0.539551	0.680176	0.640137	0.868652	0.871582	0.868652	0.94873	0.839844	0.964355	0.821289	0.784668	0.67334	0.839844
ACH-000750	0.111084	0.135132	0.333252	0.361084	0.192261	0.56543	0.0869751	0.45459	0.368408	0.438965	0.210571	0.652832	0.5	0.649902	0.549805	0.449951	0.5	0.291748	0.564453	0.45166	0.628906	0.539551	0.356201	0.458252	0.478271	0.507324	0.741211	0.899902	0.98291	0.950195	0.711914	0.394043	0.979004	0.979004	0.979004	0.610352	0.649414	0.785645	0.714355	0.403564	0.551758	0.534668	0.51709	0.560059	0.476074	0.476074	0.259766	0.481934	0.991211
ACH-000751	0.447266	0.0263214	0.0454407	0.40918	0.0270233	0.0681763	0.0454407	0.0681763	0.71875	0.277832	0.71875	0.836914	0.0968018	0.290283	0.290283	0.193604	0.161255	0.19043	0.302979	0.387207	0.483887	0.265869	0.186646	0.186646	0.479248	0.270752	0.259277	0.399902	0.083313	0.166626	0.0434875	0.740234	0.808594	0.847656	0.826172	0.236328	0.582031			0.45166	0.483887	0.193604	0.45166	1	0.0294189	0.323486	0.5	0.646484	0.807129
ACH-000752	0.00662231	0	0.0103607	0.0102005	0	0	0.0256348	0.0256348	0.0158691	0.134155	0	0	0.0959473	0.148682	0.0656738	0.0656738	0.00507736	0.0487671	0	0.0372009	0.0372009	0	0.0087738	0.0692749	0.233154	0.214722	0.0702515	0.0344849	0.0458679	0.0787964	0	0.168091	0.0928345	0.25	0.221436	0.0158691	0.0158691	0.0389709	0	0.180908	0.118286	0.138306	0.138306	0.0921021	0	0.00411606	0.0908813	0.0509949	0.278564
ACH-000753	0.0333252	0	0	0	0	0.0263214	0.0263214	0.0810547	0	0.1875	0	0.0411072	0.108093	0.0540466	0.0270233	0.0810547	0.0270233	0.0908813	0.0645142	0	0.0491943	0.399902	0.237549	0.449951	0.355469	0.139404	0.443359	0.4021	0.446045	0.453613	0.0675659	0.121643	0.318115	0.789062	0.45874	0.0918579	0.214233	0.125	0.166626	0.333252	0.489258	0.234009	0.255371	0.158691	0.176514	0.0882568	0.0856934	0.122925	0.798828
ACH-000754	0.970703	0.055542	0.606445	0.644043	0.54541	0.285645	0.153809	0.461426	0.353027	0.580078	0.4375	0.941895	0.710938	0.977539	0.911133	0.977539	0.926758	0.263184	0.253418	0.506836	0.57373	0.725586	0.51709	0.741211	0.979492	0.734863	0.928711	0.90918	1	0.931641	0.333252	0.975098	0.928711	1	0.9375	0.344727	0.891113	0.928711	0.833496	0.973633	0.974121	0.951172	0.743652	0.799805	0.928711	0.75	0.444336	0.793457	0.952148
ACH-000755	0.901367	0.47876	0	0.0142822	0.105286	0.266602	0.199951	0.233276	0.242432	0.371338	0.212158	0.45459	0.244385	0.63623	0.422119	0.34082	0.0666504	0.217407	0.329102	0.307617	0.171021	0.77002	0.849609	0.989258	0.896973	0.867676	0.92041	0.953613	1	0.875	0.789551	0.90625	0.789551	1	0.98291	0.694336	0.819336	0.625	0.666504	0.529297	0.882324	0.882324	0	1	0.577637	0.63623	0.342041	0.314697	0.736328
ACH-000756	0.0848999	0.0891724	0.00436783	0.00869751	0.0359802	0.0841064	0.0566101	0.00934601	0	0.110107	0	0.0701904	0.0508423	0.0514221	0	0.00564957	0.00564957	0.045105	0	0	0	0.0354614	0.0401611	0.155518	0.0997314	0.0586548	0.0443115	0.0583191	0.00645065	0.122437	0.0968018	0.172729	0.845703	0.855957	0.527832	0.163452	0.0913696	0.117676	0	0	0.182495	0	0	0	0.179199	0.145874	0.174438	0.0567627	0.562012
ACH-000758	1	1	1	1	0.833496				0.922852	1	1	0	0.151489	1	0.181763	1	0.424316	0.0322571					1	1	1	0.980957	0.944336	0.944336		0.833496		0.888672	0.983398	1	0.733398	0.0714111	0.928711	1	1						0.666504	1	0.928711	1	0.422119
ACH-000759	1	1	0.880859	0.476074	0.89209	0.846191	0.922852	1	1	1	1	0.956543	0.755859	0.924805	0.585449	0.902344	0.70752	0.942871	0.915039	0.956543	0.956543	0.925781	1	1	0.965332	0.965332	0.966797	1	0.952148	1	0.952148	1	1	1	0.950195	1	0.973633	0.958496	0.958496	1	1	1	1	1	0.896484	1	0.876953	0.967773	1
ACH-000761	0.213745	0.103455	0.0794678	0.379883	0.0921021	0	0.0400085	0.0999756	0.408203	0.679199	0.680176	0	0.0361328	0.19751	0.108459	0.0121918	0.0120468	0.027771	0.297607	0.0992432	0.192017	0.630859	0.63623	0.938965	0.763672	0.444336	0.907715	0.921875	0.407959	0.584473	0.618652	0.845215	0.917969	0.96875	0.846191	0.487549	0.61084	0.506836	0.613281	0.767578	0.755371	0.822266	0.822266	0.314209	0.673828	0.728027	0.386719	0.266602	0.957031
ACH-000762	0.0294189	0	0.0158691	0.0625		0.0454407	0.130493	0.0952148	0.272705	0.375	0.45459	0.0163879	0.0714111	0.0740967	0.142822	0.111084	0.0714111	0.230713	0	0.107117	0	0.409912	0.447266	0.421143	0.608887	0.478271	0.843262	0.905762	0.977539	0.811523	0.933105	0.846191	0.980957	1	0.980957	0.234009	0.425537	0.351318	0.324219	0.304443	0.0434875	0.363525	0.304443	1	0	0	0	0.881348	0.941895
ACH-000763	0.963867	0.0181885	0.575684	0.90918	1	0.793945	0.147095	0.67627	0.807617	0.821289	0.922852	0.405762	0.247437	0.824707	0.687012	0.596191	0.414062	0.510742	0.862305	0.666504	0.977051	0.725586	0.689453	0.830566	1	0.969727	0.852051	0.976074	1	0.891602	0.925781	0.818359	0.977051	0.977051	0.95459	0.716797	0.966797	0.354736	0.5	1	1	1	1	1	1	1	0.933105	0.633789	1
ACH-000764			1	0.893555	1	0.980957	0.980957	0.75	1	0.947266	1	0.843262	0.702637	0.729492	0.702637	0.729492	0.973145	1	0.973633	0.789551	0.789551	1	0.955566	0.977539	0.990234	0.97168	1	1	1	1	1	1	0.973145	0.972168	0.947266	1	1	1	0.952148	1	1	1	1	0.708496	1	1	0.980469	0.962891	1
ACH-000765	0.411865	0.117676	0	0.0232544	0	0.162109	0.162109	0	0.199951	0.192261	0.199951	0.288818	0	0.17395	0	0	0	0	0.0384521	0.160034	0.360107	0.62207	0.203735	0.351807	0.856934	0.67334	0.342041	0.414551	0.543457	0.561035	0.695801	0.54541	0.866699	0.977539	0.666504	0.0930176	0.348877	0.518555	0.407471	0.5	0.399902	0.600098	0.399902	0.40918	0.606934	0.464355	0.476807	0.5	1
ACH-000766	0.27417	0.322998	0.281494	0.352295	0.103882	0.199951	0.199951	0.0999756	0.5	0.1875	0.222168	0.298096	0.0222168	0.577637	0.0666504	0.333252	0.0888672	0.161255	0.149414	0.244141	0.282471	0.797852	0.888672	1	0.935547	0.819336	0.827148	0.962402	1	0.962402	0.931641	0.981934	0.814941	0.925781	0.945312	0.393555	0.835938	0.442871	0.462646	0.743652	0.868652	1	0.850098	0.300049	0.680176	0.959961	0.299072	0.40918	1
ACH-000767	1	1	0.850586	0.990723	1					0.979492		0.797852	0.285645	1	0.0714111	0.69043	0.261963	0.43335	1	1	1	1	0.434814	0.875977	0.79248	0.975586	0.876953	1	0.380859	1	1	0.964355	1	1	0.973633	0.945801	0.945801	0.955078	0.985352	0.899902	1	1	0.0999756		0	0.896484	0.828125	0.831055	1
ACH-000768	0.459961	0.360107	0.287598	0.41333	0.0666504	0.304443	0.478271	0.695801		0.538574		0.210571	0.448242	0.810547	0.689453	0.551758	0.362061	0.563965	0.371338	0.47876	0.662109	0.142822	0.238037	0.619141	0.646973	0.529297	0.595703	0.886719	0.5	0.783691	0.733398	0.856934	0.942871	0.98584	0.98584	0.181763	0.0454407	0.466553	0.300049	1	1	0.967773	0.22583	0.181763	0.541504	0.083313	0.360596	0.40918	0.969727
ACH-000769	0.822266	0.977539			1	1	0.961426	1	1	1	1	0	0	0.0285645	0	0.0270233	0	0	0			0.864746	0.956543	1	0.979492	0.734863	1	0.96875	1	1	1	0.82373	1	1	0.866699					1	1	0.759766	1		1	1	0.212646	0.916504	1
ACH-000770	0.737793	0.083313	0.171387	0.309814	0.342773	0.465088	0.318115	0.302246	0.518555	0.620605	0.606934	0.326416	0.307617	0.696777	0.575684	0.53125	0.318115	0.21814	0.389648	0.508301	0.770508	0.634277	0.344482	0.576172	0.965332	0.655273	0.852051	0.866699	0.833496	0.799805	0.5625	0.657715	0.953613	0.953125	0.931152	0.471436	0.408447	0.666504	0.818359	1	0.95459	0.54541	0.913086	0.75	0.950195	0.700195	0.428467	0.338867	0.942383
ACH-000771	0.458252	0.439941	0.70459	0.977051	0.0454407	0.166626	0.0232544	0.0465088	0	0.916504	0.733398	0.128052	0	0.153809	0	0	0.104492	0.0454407	0.683594	0.696289	0	0.8125	1	1	0.54541	0.90918	0.919434	0.953613	1	0.922852	0.473633	1	0.983398	0.983398	0.967773	0.742676	1	0.103455	0.103455	0.434814	0.434814	0.521973	0.869629	0.657227	0.821289	1	0.972168	0.368408	1
ACH-000772	0.548828	0.0196075	0.0645142	0.158691	0.695801	0.142822	0	0.133301	0.600098	0.568359	0.549805	0.346191	0.285645	0.981934	0.660645	0.927246	0.964355	0.17395	0.647949	0.309814	0.689941	0.706055	0.806152	0.938965	0.918457	0.87207	0.966797	0.977539	0.75	0.842773	0.768066	1	0.989258	0.979004	0.96875	0.640137	0.569824	0.782715	0.666504	1	0.843262	0.759766	0.745117	0.805664	0.45459	0.848633	0.792969	0.841309	0.983398
ACH-000773										1															0.993164	0			0.987305		0.995605		0.995605	1	0.995605			0.992188	1	0.995605	1	0.995605	0	0.994141			0	1	0.996094
ACH-000774	0.254883	0.254883	0	0	0.0714111	0	0	0	0	0.43335	0.416748	0.619141	0	0.375	0.0208282	0.291748	0		0.852051	0.370361	0.481445	0.764648			1	0.766602	1	0.859863	0.666504	0.313721	0.125	0.19043	0.922852	0.320068	0.296387	0.473633	0.0263214			0.0769043	0.0908813	0.461426	0.615234	0.950195	0.589844	0.589844	0.196045	0.275391	0.811523
ACH-000775	0.922852	0.692383	1	0.799805	0.428467				0.769043	0.799805	0.807617	0.0806274	0.266602	0.666504	0.266602	0.333252	0.0666504	0	0.80957	0.549805	1	0.978027	0.981934	1	1	0.93457	0.833496	1	1	0.803223	0.833496	0.971191	1	0.985352	0.985352	0.938965	1	1	0.764648	1	1	1	1	1	0.875	0.6875	0.890137	0.898926	1
ACH-000776	0.0322571	0	0.0117645	0	0.0326233	0	0.0161285	0.0484009	0.0317383	0.131592	0.0484009	0.106812	0	0.153809	0	0.0384521	0.0128174	0.0227203	0.102051	0.0515442	0.154663	0.190674	0.251709	0.181152	0.329102	0.291992	0.0928345	0.418457	0.468018	0.364258	0.432617	0.244629	0.624023	0.792969	0.5	0.097229	0.132812	0.181763	0.113647	0.0825806	0.190918	0.181763	0.284424	0.258545	0.29541	0.227295	0.253906	0.396729	0.468994
ACH-000777	0.63623	0.63623	0.055542	0.055542	0.027771				0	0.588379	0.083313	0	0.0925903	0.888672	0.518555	0.777832	0.0925903	0.5	0	0	0.944336	0.953613	0.399902	1	1	0.916504	0.933105	0.966797	1	0.966797	0.0769043	1	1	1	1	1	1	0.952148	0.523926	0.75	0.75	0.75	1				0.197021	0.442627	1
ACH-000778	0.838867	0.354736	0.0243835	0.619141	0.761719	0.5	0.535645	0.928711	0.899902	0.666504	0.899902	0	0.510254	1	0.816406	0.612305	0.612305	0.222168	0.273926	0.321533	0.178589	0.367432	0.772949	0.739258	0.98291	0.864258	0.961426	0.961426	1	0.961426	0.888672	0.944336	1	1	0.950195	0.375	0.449951	0.117676	0.1875	0.965332	1	0.758789	1	1	0.610352	0.610352	0.5	0.537598	0.935547
ACH-000780	1	1	0.0116272	0.988281						0.875		1							0.980957	1	1	1			1	1							0.980957	0.990234	0.990234			1	1										1
ACH-000781	0.339355	0.285645	0.428467	0.652832	0.675781	0.527344	0.0908813	0.163696	0.772949	0.763184	0.95459	0.459961	0.293213	0.637695	0.310303	0.568848	0.241333	0.103455	0.485596	0.594238	0.669922	0.588867	0.902344	0.976074	0.96875	0.78125	0.98291	0.913574	0.978027	0.98291	0.826172	0.888672	0.961914	0.974609	0.95166	0.964355	0.964355	0.52002	0.439941	1	0.846191	1	1	0.826172	0.571289	0.952148	0.707031	0.86377	0.938477
ACH-000782	1	1	1	1	1					1		1	1	0.761719	1	1	1	1	1	0.96875	1	1	0.623535	0.931152	1	0.973633	0.901855	1	1	1	1	1	1	1	1	1	1	1	0.640137	1	1	0.933105	0.933105	1			1	1	1
ACH-000783	0.961426	0.962891	0.82373	0.63623	0.620605	0	0.125		0.875	1	0.625	0.375	0.399902	0.850098	0.399902	0.649902	0.449951	0	0.428467	0.571289	0.856934	0.839844	0.611328	1	0.956543	0.875	1	1	0.933105	0.956543	0.882324	0.95459	1	1	1	0.806641	0.758789	0.90918	0.818359	0.888672	0.210571	0.899902	0.947266		1	0.866699	0.5625	0.799805	0.908203
ACH-000784	1	0			0.0027256																	1			1	1												0	0									0.00261116
ACH-000785	0.074646	0.134277	0	0.0166626	0.0294189	0	0.083313	0		0.189209		0.19104	0	0	0	0	0	0	0	0.183105	0.183105	0.0116272	0.544922	0.558594	0.75293	0.294189	0.434326	0.321533	0.166626	0.25	0.333252	0.338135	0.396484	0.620605	0.568848	0.283691	0.328369	0	0	0.244385	0.134644	0.196045	0.137207	0.272705	0.0392151	0.235352	0.185425	0.100952	0.673828
ACH-000786	0.92041	0.634766	0.888672	0.873047	0.933105	0.922852	0.961426	0.959961	1	0.973145	0.722168	0.983398	0.931641	0.976562	0.90918	0.977051	0.977051	0.90918	0.97168	0.971191	0.957031	0.966797	0.802734	0.97168	1	0.987305	0.978027	0.989258	0.98291	0.891113	0.916504	0.934082	0.946289	1	0.96875	0.942383	0.875	0.979004	0.979004	0.973145	0.973633	0.973633	0.837891	1	0.952148	0.976562	0.994629	0.943359	0.98877
ACH-000787	0.0908813	0	0	0	0	0	0	0	0.320068	0.176514	0.839844	0	0	0	0	0	0	0	0	0	0	0.32251	0.461426	0.461426			0.659668	0.979492	1	0.979004	1	0.700195	1	0.774414	0.986328	0	0.799805	0	0	1	1	1	1				0.326904	0.425049	1
ACH-000788	0.328125	0.149292	0.194458	0	0.199951	0.285645	0.0999756	0.0895386	0.292725	0.241333	0.195068	0.340332	0.0652466	0.533203	0.260986	0.391357	0.195679	0.285645	0.142822	0.196411	0.232178	0.557129	0.439941	0.546875	0.758301	0.5625	0.513672	0.506348	0.52832	0.552734	0.509277	0.5625	0.94043	0.984863	0.882324	0.603027	0.649902	0.277832	0.166626	0.359375	0.522461	0.588379	0.441162	0.706055	0.646973	0.605957	0.271729	0.293457	0.931152
ACH-000789	0.961426	0.769043	0.888672	1	0.8125	0.947266	0.184204	0.894531	0.939941	0.818359	1	0.651367	0.681641	0.95459	0.34082	0.727051	0.522949	0.5	0.862305	0.758789	0.758789	0.912598	0.812988	0.891113	0.986816	0.831055	0.937988	0.938965	0.950195	0.907227	0.949219	0.928711	0.941406	0.956055	0.911621	0.95459	1	0.714355	0.928711	0.907715	1	0.924316	0.969727	0.804199	0.766602	0.966797	0.827637	0.880859	0.958496
ACH-000790					0.583496	0.177734	0.0217438	0.0217438		1			0.125	0.387207	0.121216	0.302979	0.181763		0.799805	0.799805	0.700195	0.681152	0.928711	0.928711	0.864746	0.648438	0.853027	0.970703	1	0.970703	0.75	1								0.428467	1	1	1				0.456543	0.864258	0.95459
ACH-000791	0.962891	0.777832	0.25708	0.371338	0.131592	0.428467	0.428467	0.428467	0.619141	0.75	0.952148	0.490479	0.653809	0.943359	0.660156	0.679199	0.660156	0.294189	1	0.792969	1	0.560547	0.860352	0.895508	0.932617	0.674316	0.981445	1	0.779297	0.944336	0.644531	0.859863	1	0.98877	0.978027	0.592285	0.605469	0.119995	0.125	1	0.975098	0.871582	0.975098	1	1	1	0.711426	0.727051	0.972656
ACH-000792	0	0	0	0.0975342	0.0434875	0	0	0	0.852051	0.725098	0.852051	0	0.0877075	0.285645	0	0.175415	0	0	0.0161285	0	0.0163879	1	0.916504	0.916504	1	0.600098	0.743164	1	0.641113	0.671387	0.641113		0.391357	1	1	0.666504	0.666504			1	1	1	1				0.839355	0.703613	1
ACH-000793												1										0.0185242			0.470215	0.470215	1	0.00971222		1						0.787109	0.785156										0.387207	0.348145
ACH-000794	1	0.617188	0.333252	0.651367	0.206909	0.434814	0.0434875	0.600098		0.615234		0.030304	0.0416565	0.0425415	0.0625	0.0625	0.0217438	0	0.0357056	0.0178528	0.0357056	0.595703	0.808594	0.851074	0.922852	0.577148	0.65918	0.977539	0.935547	0.844238	0.969727	0.585449	1	1	0.392822	0.577148	0.519043	0.0499878	0.0999756	0.971191	1	0.89209	1	0.214233	0.241333	0.379395	0.5	0.0759277	1
ACH-000795	1	0.85498	1	1	1	0.925781	0.740723	0.777832	0.714355	1	1	0.963867	0.600098	0.933105	0.866699	0.933105	0.933105	1	0.961426	0.960938	0.980469	0.989746	1	1	0.993164	0.993164	1	0.917969	0.979004	0.986328	0.9375	0.97998	0.980469	0.879883	0.960938	0.916504	0.799805	0.974121	0.846191					0.933105	0	0.111084	0.98291	0.971191	0.95752
ACH-000796	0.739258	0.630371	0.274902	0.425049	1	0.386475	0.431885	0.465088	0.771484	0.399902	0.799805	0.0124969	0.083313	0.483398	0.166626	0.43335	0.0166626	0.21875	0.214233	0.333252	0.619141	0.558594	0.858887	0.91748	0.988281	0.954102	0.984375	0.922852	0.967773	0.89209	0.838867	1	0.88623	1	1	0.819336	0.777832	0.181763	0.19043	1	0.925781	0.925781	0.814941	0.981934	0.575684	0.696777	0.790527	0.469238	0.98877
ACH-000797	0.51123	0.0222168	0.117004	0.31958	0.558594	0.0714111	0.107117	0.142822		0.605957		0.125	0	0.681641	0.681641	0.681641	0.681641	0	0.279053	0.162842	0.860352	0.297363	0.132324	0.661621	0.583496	0.0208282	0.649902	0.619141	0.399902	0.856934	0.166626	0.856934	1	0.964355	0.965332	0.125	0.5	0.145874	0.148926	1	1	0.90918	1	0.869629	0.46875	0.5	0.365234	0.354248	0.837891
ACH-000798	0	0	0.0444336	0.0444336	0.108704	0	0	0.461426	0.666504	0.275879	0.666504	0	0	0.0476074	0	0	0	0	0	0.104187	0.0416565	0.0535583	0.25	0.399902	0.87793	0.619141	0.640137	0.588379	0.0999756	0.215698	0	0.5625	0.826172	1	0.956543	0.21875	0.161255	0.666504	0.476074	0.263184	0.263184	0.315674	0.263184	0.646973	0.483887	0.193604	0.0227203	0.49292	0.879395
ACH-000799	0.230713	0	0.449951	0.524902	0.416748	0.294189	0.294189	0.470703	0.86377	0.333252	0.63623	0.268555	0.324219	0.594727	0.324219	0.594727	0.189209	0.222168	0.418213	0.381836	0.690918	0.951172	0.938477	0.852051	0.952148	0.547852	1	1	0.967773	0.638672	0.483887	0.65625	0.742676	0.914062	0.902832	0.52002	0.640137	0	0	0.600098	0.950195	0.950195	0.700195	0.541504	0.484863	0.484863	0.387451	0.396729	0.986328
ACH-000800	0.00869751	0.0695801	0.0158691	0.015625	0.155762	0	0	0	0.444336	0.342529	0.444336	0.0982056	0	0.219971	0.0541992	0.0591125	0.00492477	0	0	0	0.201172	0	0	0.0948486	0.00806427	0.0240021	0.413086	0.5625	0.131348	0.552246	0.081604	0	0.410645	0.760254	0.768555	0	0	0	0	0	0.0114975	0	0	0.438477	0.521973	0.521973	0.138672	0.256104	0.675781
ACH-000801	0.283447	0.0166626	0.125	0.125	0.0526428	0	0.310303	0.0714111	0.166626	0.150024	0.153809	0	0	0.0625	0	0	0	0	0	0	0.444336	0.0769043	0.846191	0.922852	0.333252	0.0476074	1	1	0.217407	0	0	0.333252				0.646973	0.646973			0.0333252	0.399902	0.0344849	0.399902	0	0.133301	0.199951	0.0172424	0.688965	0.63623
ACH-000802					0	0	0	0.0434875		0.413818		0.177734	0.027771	0.399902	0.083313	0.027771	0.027771	0	0	0	0	0.449951	0.0400085	0.959961	0.913086	0.326172	0.5	0.5	0	0.509277	0	0.0666504	1	1	0.861328	0.399902	0.399902	1	1	0.615234	0.384521	0.769043	0.384521		0.176514	0.176514	0.241333	0.23938	0.851074
ACH-000803	0.95459	0.911133	0.973145	0.864746	1	0.896484	0.807617	0.629395	0.973145	0.898438	1	0.674316	0.580566	0.975586	0.758301	0.838867	0.588867	0.235352	0.910156	0.756348	0.820312	0.991211	0.771973	0.924805	0.919922	0.866699	0.868164	0.923828	0.942871	0.869629	0.914062	0.944336	1	1	0.978516	0.977051	0.873535	0.813965	0.790527	1	0.799805	0.685547	0.666504	1	0.459473	1	0.79248	0.847168	0.874512
ACH-000804	0.308838	0.396973	0	0.0714111	0.148193	0.241333	0	0.0357056	0.25	0.399902	0	0.592285	0.0294189	0.0606079	0.0294189	0.264648	0.294189	0	0	0	0	0.189209	0.465088	0.348877	0.657715	0.315674	0.767578	0.59082	0.333252	0.511719	0.345459	0.199951	0.233276	0.383301	0.199951	0.449951	0.533203	1	1	0.615234	0.846191	0.846191	0.692383	0.3125	0.542969	0.657227	0.125	0.729492	1
ACH-000805	0.160034	0	0	0.055542	0	0	0.0476074	0	0.111084	0.548828	0.263184	0.0900879	0	0.631348	0	0.549805	0.199951	0.344727	0.272705	0.0357056	0.0925903	0.210571	0.302979	0.382324	0.199951	0.19043	0.346924	0.285645	0.0681763	0.285645	0.0444336	0.193604	0.105286	0.868652	0.589844	0.0487671	0.0731812	0.269287	0.40918					0.307617	0.107117	0.185181	0.199951	0.0671997	0.917969
ACH-000806	1	0.595703	0.219482	0.438965					0.777832	0.629395	0.777832	0.110107	0.586426	0.973145	0.82666	0.773438	0.600098	0.439941	0.166626	0.166626	0.40918	0.747559	0.618652	0.95752	0.893555	0.493408	1	0.987793	0.813965	0.950684	0.619141	1	0.990234	0.990234	0.97168	0.730957	0.705078	1	1	0.893066	1	0.981934	0.768066	0.814941	0.95459	0.837402	0.191528	0.75	1
ACH-000807	0.757812	0.716309	0.53125	0.676758	0.933105					0.821289		0.488037	0.613281	0.962402	0.594238	0.866699	0.79248	0.838867	0.622559	0.962402	0.905762	0.900879	1	0.928711	0.986328	0.904297	0.956543	0.968262	0.964844	0.946777	0.894043	0.919922	0.92041	0.985352	0.963379	0.931641	0.98877	0.959961	0.958984	1	1	1	0.871582	0.769043	0.878906	1	0.91748	0.817383	1
ACH-000808	0.107422	0.0991821	0.137939	0	0.0365906	0.0416565	0	0.125	0.600098	0.259277	0.799805	0.0114975	0.0163879	0.283447	0.0163879	0.229492	0	0	0	0	0.03125	0.172852	0.26001	0.339844	0.358398	0.416748	0.0536804	0.132568	0.523926	0.11615	0.403809	0.235352	0.191162	0.19397	0.205933	0.184204	0.245605	0.411865	0.411865	0.0999756	0.0333252	0.0333252	0.0999756	0.0422668	0.0196075	0.106812	0.212891	0.0758667	0.161011
ACH-000809																							0	0									1	1	1												0
ACH-000810	0.333252	0.125	0.186035	0.133301	0.105286	0	0	0	0.214233	0.1875	0.428467	0.119995	0.264648	0.575684	0.382324	0.411865	0.470703	0.40918	0.0645142	0.0645142	0.0645142	0.5	0.369873	0.479492	0.626465	0.474854	0.407471	0.464355	0.5	0.392822	0.509277	0.0526428	0.958496	0.972168	0.833496	0.394043	0.469727	0.166626	0.178589	0.457031	0.470703	0.428467	0.428467	0.961426	0.399902	0.399902	0.306885	0.494629	0.91748
ACH-000811	0.853027	0.205933	0.0888672	0.177734	0	0.23999	0.160034	0.0800171	0.399902	0.941406	0.600098	0	0.0882568	0.394043	0.0294189	0.117676	0.147095	0	0.457031	0.457031	0.828613	0.600098	0.652344	0.617188	0.913574	0.71582	0.899902	0.975586	0.912109	0.975586	0.824707	0.856934	1	1	0.86377	0.574707	0.531738			0.63623	0.54541	1	0.363525		0.818359	0.696777	0.593262	0.301514	0.924805
ACH-000812			0	0	0.777832	0	0	0.111084	0.5625	0.157837	0.96875	0.40918	0.882324	0.706055	0.764648	0.882324	0.588379	0	0.5	0.875	0.5625	0.799805	0.75	0.833496	0.913086	0.891113	0.928711	1		1		1				0.529297	0.706055			0.925781	0.925781	0.961426	0.185181		0.922852	0.769043	0.785645	0.933105	0.950195
ACH-000813	0.900879	0.772461	0.622559	0.858398	0.196045	0.818359	0.939453	0.875	0.79248	0.625	0.773438	0.657227	0.847168	0.917969	0.923828	0.929199	0.918457	0.686035	0.947754	0.9375	0.958496	0.776367	0.862305	1	0.935059	0.768066	0.954102	1	0.992676	0.944824	0.881348	0.936035	0.955566	1	0.94043	0.789551	0.748535	0.782715	0.869629	0.952148	0.976562	0.976562	0.860352	0.939941	0.956055	0.652344	0.785645	0.802734	0.958496
ACH-000814	0	0	0.11322	0	0.25	0	0.166626	0	0	0.285645	0	0.121216	0.0370483	0.222168	0	0.148193	0.0384521		0.0416565	0.0416565	0.083313	0.344727	0.235352	0.411865	0.568848	0.519043	0.155151	0.311523	0.230713	0.327637	0.0769043	0.5	0.600098	0.724121	0.535645	0.241333	0.285645	0.083313	0.0769043	0	0.199951	0.199951	0.133301	0.388916	0.157837	0.150024	0.0384521	0.205933	0.631348
ACH-000815	0.0214996	0.03125	0	0	0.083313	0.105286	0.0526428	0.166626	0.230713	0.333252	0.153809	0.0625	0.285645	0.643066	0.533203	0.600098	0.600098		0.135742	0.0625	0.287598	0.24353	0.0908813	0.222168	0.421143	0.328857	0.508301	0.865723	0.606934	0.820801	0.0344849	0.386475	0.515625	0.984375	0.8125	0.0845337	0.0908813	0.0370483	0.0370483	0.54834	0.566895	0.419434	0.22583	0.577148	0.0222168	0	0.0326233	0.421875	0.89209
ACH-000816	0.890625	0.644043	0.146362	0.25293	0.315674	0.180298	0.278809	0.600098	0.487061	0.827148	0.692383	0.326416	0.44751	0.885742	0.228516	0.359131	0.390381	0.222168	0.666504	0.504883	0.747559	0.671387	0.734863	1	0.905273	0.684082	0.957031	0.978516	0.966309	1	0.881348	0.555664	0.97998	1	0.97998	0.638184	0.936035	0.591797	0.448975	0.9375	0.9375	0.9375	0.9375	0.67627	0.727051	0.745605	0.691895	0.682617	0.973145
ACH-000817	0.463379	0.0243835	0.487061	0.871582	0.54541	0.268311	0.0243835	0.292725	0.199951	0.52002	0.150024	0.520996	0.353027	0.646973	0.646973	0.696777	0.605957	0.304443	0.515137	0.446045	0.661621	0.782715	0.450928	0.764648	0.894531	0.754395	0.839355	0.963379	0.864258	0.976074	0.777832	0.787109	0.875	1	0.914062	0.658203	0.658203	0.916504	0.708496	0.760742	0.854004	0.75	0.936035	1	0.879883	0.360107	0.547852	0.280762	1
ACH-000818	1	0.899902	0.666504	0.75	0.512207	0.214233	0.107117	0.0689697	1	0.916504	1	0.918457	0.481445	0.962891	0.296387	0.555664	0.370361	0.444336	0.919922	0.879883	0.959961	0.875	0.854004	0.851074	0.959961	1	0.842285	0.894531	0.871094	0.981934	0.882324	0.739258	0.949219	1	1	0.8125	0.935547	0.922852	1	1	1	0.928711	0.928711	0.899902	0.888672	0.972168	0.956543	0.835449	0.976562
ACH-000819													0	0.99707	0	0	0.0030117
ACH-000820	1	0.489258	0.629395	0.785645	1	0.238037	0	0.856934	0.916504	0.63623	0.666504	0	0	0	0	0	0	0	0.020401	0.0208282	0.020401	0.643066	1	0.976562	0.888672	0.666504	1	1	1	0.961426	1	0.922852	0.971191	0.971191	0.856934	0.533203	0.965332			1	1	1	0.571289	1	0.976074	0.856934	0.679199	0.869629	1
ACH-000821	0.700195	0.280029	0.521973	0.0444336		0.148193	0.518555	0.518555		0.315674		0	0.25	0.70752	0.109375	0.4375	0.380859	0.111084	0.645996	0.81543	0.953125	0.975586	0.47168	0.849121	0.84375	0.753906	0.693359	0.952148	1	1	1	0.931152	1	0.899902	0.924805	0.553223	0.39209	1	0.882324	1	1	1	0.652344	0.5			0.480957	0.790039	0.988281
ACH-000822	0.0128174	0.088623	0.0306091	0.0306091	0	0	0	0.0499878	0.0689697	0.0750122	0.172363	0.0740967	0.030304	0.0606079	0.030304	0.030304	0	0.210571	0.0784302	0.15686	0.0196075	0.416748	0.0822144	0.306641	0.459717	0.363525	0.774902	0.84082	0.618164	0.88623	0.563477	0.641602	0.90625	0.96875	0.938477	0.046875	0.328125	0.455811	0.373047	0.681641	0.59082	0.619141	0.619141	0.444336	0.646973	0.450928	0.260986	0.415039	0.916016
ACH-000823										0.782715													0	0			0.96875	0.974121		0.989746		0.995605															0.00247574
ACH-000824										0.0249939								0				1			1	0			1		0					1	1			1	1	1	0.996582						1
ACH-000825	0.281982	0.00512695	0.321289	0.178589	0	0.0428467	0.0428467	0.214233	0.346924	0.325684	0.13269	0.222168	0.162354	0.581543	0	0.163452	0.578125	0.0243835	0	0	0.774414	0.254883	0.508301	0.98291	0.0755005	0.0566101	0.899902	0.748535	0.552246	0.223999	0.0375977	0.333252	0.446533	1	0.768555	0	0	0.882324	0.030304	1	0.979492	0.958984	0.979004	0.978027	0	0	0.00442505	0.214233	0.996094
ACH-000826	0.805176	0.421387	0.222168	0.430664	0.212158	0.0612183	0	0.326416	0.818359	0.687988	0.727051	0.0298462	0.04245	0.441406	0.0747681	0.272217	0.140869	0	0.276855	0.181763	0.451904	0.794922	0.757812	0.886719	0.990234	0.757324	0.974121	0.910156	0.914062	0.896973	0.943848	0.918945	0.874023	0.993652	0.94043	0.834961	0.666504	0.887695	0.822266	0.235352	0.419922	0.160034	0.529297	0.785645	0.868652	0.721191	0.833984	0.695312	1
ACH-000827	0.268311	0	0	0.0167999	0	0.0198059	0.00990295	0.098999	0.136353	0.350586	0.431885	0	0.408447	0.779297	0.309814	0.422607	0.211304	0.0200043	0.655273	0.35083	0.571289	0.386719	0.52832	0.565918	0.910645	0.768066	0.815918	0.549805	0.304688	0.449951	0.361816	0.594727	0.74707	0.934082	0.90332	0.51709	0.369873	0.444336	0.277832	0.132324	0.426514	0.507324	0.161743	0.426025	0.0987549	0.148193	0.32373	0.428467	0.936523
ACH-000828	0.837891	0.266602	0.0652466	0.195679	0.130493	0.0740967	0	0.222168	0.304443	0.470703	0.695801	0.303955	0.0350952	0.54541	0.142822	0.125	0.210571	0.193604	0.662598	0.494141	0.435303	0.37915	0.768555	0.91748	0.890625	0.640625	0.740234	0.740723	0.678711	0.765625	0.547852	0.581055	0.5	0.910645	0.910645	0.505371	0.554199	0.772949	0.86377	0.394775	0.842285	0.842285	0.702637	0.694336	0.674316	0.70459	0.463135	0.435791	0.967773
ACH-000829										0.692383																																					0.888672		0.993652
ACH-000830	0.833496	0.875	0.911621	0.911621	0.478271	0.901855	0.706055	0.843262	0.958496	0.896484	0.979004	0.841309	0.82373	0.980469	0.568848	0.882324	0.509766	0.611328	0.941406	0.625	0.75	0.870605	0.758301	0.935547	0.907227	0.799805	1	0.933105	1	0.933105	0.939941	1	0.984863	0.907715	0.984863	0.856934	0.914062	0.911621	1	0.835938	0.933105	0.93457	0.816895	0.769043	0.444336	1	0.859375	0.891113	0.87793
ACH-000831	0.958496	0.266602	0.392822	0.744141	0.338135	0.399902	0.674805	0.519043	0.695801	0.333252	0.956543	0.134155	0.251953	0.593262	0.251953	0.300781	0	0.102966	0.45459	0.215942	0.379395	0.711426	1	0.961426	0.950195	0.887695	0.75	0.973145	1	0.837891	0.407471	0.9375	0.991699	0.991699	0.991699	0.194092	0.411865			1	1	1	1		0.971191	0.342773	0.302246	0.827637	1
ACH-000832	0.523926	0.0238037	0.464355	0.258057	0.214233	0.587402	0.142822	0.37085	0.388916	0.527832	0	0.227905	0.0422668	0.408447	0.0422668	0.211304	0.211304	0	0.0322571	0	0.0161285	0.337402	0.12262	0.25	0.527832	0.486084	0.961426	0.980957	0.914062	0.82373	0.799805	1	0.969727	0.929199	0.990234	0.386475	0.20459	0.370361	0.307617	0.258057	0	0.0625	0.0968018	0.709473	0.363525	0.394043	0.317871	0.465576	1
ACH-000833	1	0.478271	0.375	0.6875						0.56543		0.735352	0.913574	0.792969	0.70166	1	0.929688	0.0370483	0.142822	0.142822	0.142822	0.772949	0.0769043	0.807617	0.693848	0.652832	0.838867	1	0.856934	0.625	0.25	0.90918	0.608887	1	0.958496	0.388916	0.166626	0.304443	0.136353					1	0.444336	0.222168	0.431885	0.408447	1
ACH-000834	0.864258	0.262207	0.247192	0.539551	0.274414	0.5	0.521973	0.56543	0.416748	0.808105	0.5	0.370605	0.12561	0.41626	0.0603027	0.0913696	0.095459	0	0.359375	0.285645	0.37793	0.640625	0.588867	0.766113	0.942871	0.714355	0.855957	0.924316	0.789551	0.811523	0.614258	0.48877	0.955078	0.993652	0.956055	0.324219	0.324219	0.735352	0.470703	0.210571	0.526367	0.210571	0.421143	0.856934	0.546875	0.546875	0.298096	0.746582	0.985352
ACH-000835	0.23645	0	0.58252	0.456299	0.270264	0.220337	0.0169525	0	0.105286	0.333252	0.0526428	0	0.755371	0.755371	0.688965	0.755371	0.755371	0	0	0.0416565	0.0416565	0	0	0	1	1	0.632812	0.821289	0.722168	0.75	0.694336	0.790527	0.378418	1	1	0.180908	0.19043	0.25	0.25	0.256348	0.263184	0.256348	0.256348	0.672363	1	1	0.481445	0.152832	1
ACH-000836	0.386719	0.0800171	0.133301	0.333252	0.199951	0	0	0.0769043	0.199951	0.300049	0	0.215088	0.126953	0.460205	0.333252	0.396729	0.126953	0.241333	0.336914	0.186768	0.315186	0.209351	0.333252	0.634277	0.52002	0.429932	0.460938	0.600098	0.554199	0.507812	0.364746	0.567383	0.966309	0.931641	0.958496	0.361084	0.370361	0.375	0.375	0.202881	0.23877	0.231934	0.304443	0.5	0.518555	0.388916	0.318115	0.450195	0.918457
ACH-000837	0.476074	0.206299	0.177368	0.359375	0.333252				0	0.267822	0	0.140015	0.109375	0.53125	0.328125	0.359375	0.515625	0.115356	0.366211	0.414307	0.614258	0.401123	0.658691	0.832031	0.781738	0.587402	0.568848	0.702637	0.757812	0.544434	0.626465	0.529297	0.861328	0.902832	0.916504	0.548828	0.597168	0.5	0.428467	0.292725	0.428467	0.658691	0.350098	0.457031	0.274414	0.254883	0.262207	0.150879	0.928711
ACH-000838	1	1			0.799805	0.941406	0.941406	0.941406	1	0.956543	1	0.975586	0.86377	0.86377	1	1	1	1	1	1	1	0.90918	0.964844	1	1	1	1	1	1	1	1	1	1	1	0.989258	1	1	1	1	1	1	0.895996	0.75	1	1	1	0.911133	0.90332	1
ACH-000839	0.0476074	0.0119019	0.208374	0.347168	0.0533447	0.0793457	0.142822	0.0793457	0.34375	0.411865	0.59375	0.0107498	0.0983887	0.196777	0.0645142	0.196777	0.0163879	0.166626	0.0551758	0.103455	0.069458	0.186768	0.452393	0.459717	0.377441	0.424316	0.820312	0.961914	1	0.848145	0.956543	0.606934	0.911621	0.911621	0.985352	0.389893	0.534668	0.297852	0.148926	0.232544	0.581543	0.651367	0.651367	1	0.325684	0.24707	0.569336	0.195312	0.813477
ACH-000840	0.965332	0.551758	0.473633	0.117676	0.659668	0.353027	0.353027	0.470703	0.920898	0.583496	0.473633	0.288818	0.0444336	0.333252	0.199951	0.333252	0.133301	0.181763	0	0.030304	0.030304	0.368408	1	1	0.956055	0.521973	0.0588379	0.666504	1	1	0.735352	0.733398	1	0.976074	0.904785	0.850098	0.399902			0.63623	1	0.54541	0.63623	0.333252	0	0	0.491699	0.693359	1
ACH-000841	0.428467	0.380859	0.15625	0.4375		0.217407	0.239136	0.391357	0.777832	0.692383	0.814941	0.0147095	0.263184	0.855469	0.618652	0.716309	0.552734	0.511719	0.463379	0.456787	0.777832	0.557617	0.692383	0.980957	0.984863	0.806152	0.910645	0.894531	1	0.894531	1	0.735352	0.986328	1	0.918945	0.670898	0.565918	1	0.75	0.759277	1	0.886719	0.722168	0.833496	0.916504	0.888672	0.294189	0.663574	0.876953
ACH-000842	1	1	1	1	1	0.69873	0.838867	1	0.951172	0.87793	0.951172	0	0.706055	0.706055	0.0882568	0.706055	0		1	0.635254	1	0.858398	1	1	0.986328	1	0.662109	1	0.744629	0.975098	1	1	0.986816	0.986816	0.959961	0.980957	0.577148			0.983887	1	1	1	1	1	1	0.468994	1	1
ACH-000843	0	0	0	0.475098	0.583496	0	0.484863	0.300049	0.263184	0.5	0.0526428	0.0681763	0	0.42041	0	0.112366	0.0561829	0.212158	0.233032	0	0.184448	1	0.252686	0.912109	0.985352	0.603027	0.922852	0.771973	0.417725	0.86084	0.43042	1	1	1	0.835449	0.613281	0.525391	0.952148	0.956543	0.1875	0.375	0.6875	0.40625	0.603027	0.171387	0.228516	0.184448	0.14502	0.986816
ACH-000844	0.890137	0.615234	0.838867	0.90332	0.724121	0.65918	0.431885	0.727051	0.724121	0.75	0.766602	0.455811	0.528809	0.954102	0.632324	0.790527	0.655273	0.899902	0.836914	0.905762	0.858398	0.89209	0.882324	0.941895	0.98584	0.942871	0.891602	0.93457	0.924805	0.935059	0.912598	0.693359	0.95752	0.923828	0.940918	0.927246	0.969238	1	0.842773	0.875	1	1	0.945312	0.86377	0.799805	0.885742	0.955566	0.896973	0.994629
ACH-000845	0.571289	0	0.0612183	0.083313	0.166626	0.133301	0	0	0.0714111	0.285645	0.142822	0.432617	0.185181	0.538574	0.222168	0.370361	0.307617	0.128174	0.391357	0.282715	0.441895	0.360596	0.681641	0.902344	0.878906	0.575684	0.702148	0.854004	0.897461	0.90918	0.736816	0.692383	0.935547	1	0.90332	0.333252	0.199951	0.535645	0.280029	0.875	0.875		1	0.363525	1	0.799805	0.0249939	0.0759277	0.975098
ACH-000846	0.631348	0.105286	0.833496	0.944336	0.25	0.646973	0.0882568	0.605957		0.785645		0.628906	0.3125	0.873535	0.600098	0.75	0.375	0.363525	0.0999756	0.5	0.300049	0.980469	0.848633	1	0.953613	0.846191	0.913086	0.913086		0.826172		1	0.952148	0.904785	0.799805			0.555664	0.555664					0.666504	0.594727	1	0.555664	0.78418	0.911133
ACH-000847	0.40332	0	0	0.842285	0.384521	0.75	0	0.63623	0.916504	0.0908813	0.916504	0	0	0.434082	0.0188751	0.0566101	0		0.108093	0.162109	0.216187	1	0.525391	0.745605	0.90625	1	0.0625	0.9375		0.9375		1				0	0.922852			0.846191	0.846191	0.846191	1	1	0.700195	0.819824	0.555664	0.984375
ACH-000848																		0.00415039
ACH-000849	0.630371	0.130493	0.236816	0.289551	0.09375	0.0975342	0.0476074	0.142822	0.102051	0.346191	0.122437	0.171387	0.0606079	0.515137	0.151489	0.333252	0.121216	0.0588379	0.205933	0.212158	0.181763	0.228882	0.20752	0.565918	0.560547	0.363525	0.590332	0.885254	0.890625	0.835938	0.640625	0.456055	0.766602	0.966797	0.966797	0.328369	0.432861	0.54541	0.318115	0.819824	0.666504	0.529297	0.399902	0.640137	0.452393	0.476074	0.326904	0.214966	0.949219
ACH-000850	0.235352	0.0285645			0	0.160767	0.473633	0.464355	0.166626	1	0.0930176	0	0	0	0	0	0					0.919922	1	0.0454407	0.426758	0.986816	0.952148	0.952148	0.952148	0.952148	0.0999756	1	1	0.944336	1	0	0							1	0.0908813	0	0.210571	0	0.87207
ACH-000851	0.0227203	0	0.318115	0.363525	0.0344849	0.0322571	0	0.25	0.6875	0.736816	0.5	0.0612183	0.192261	0.615234	0.320068	0.280029	0.280029	0.0999756	0.605469	0.563477	0.915527	0.577148	0.838867	0.946289	0.923828	0.666504	0.95166	0.970703	0.891113	0.912598	0.981934	0.98291	0.966797	0.975098	0.90918	0.878906	0.86377	0.360107	0.439941	0.960938	0.905762	0.980957	0.868164	0.966797	0.75	0.9375	0.559082	0.819336	0.920898
ACH-000852	0.0044632	0.0133896							0.00658035	0.055542	0.00662231	0.00511551	0	0.00552368	0	0	0	0.00813293	0	0	0	0.986328					0.00523376	0	0.473389	0	0					0.004673	0											0.0274048	1
ACH-000853	0.799805	0.710938	0.922852	0.876953	0.769043	0.894531	0.789551	0.444336	1	0.78125	0.888672	0.904297	0.727051	0.878906	0.788086	0.938477	0.894043	0.925781	0.888672	0.86377	0.896484	0.940918	0.856934	0.886719	0.951172	0.860352	0.911621	0.910156	0.969238	0.88623	0.953613	0.971191	0.783691	0.986328	0.973145	0.869141	0.895996	0.90918	0.90918	0.692383	0.961426	0.959961	0.961426	1	0.541504	0.958496	0.922852	0.945312	0.970703
ACH-000855	1	0.978027							0.00809479	1	0.00800323	0.00500107										0.00432968			0.994141	1										1	0.996582												1
ACH-000856	0.0714111	0.0178528	0.0285645	0.027771	0.111084	0	0	0.0588379	0	0.523926	0	0.0104141	0.0439453	0.428467	0.0219727	0.065918	0.0769043	0.0322571	0	0.168823	0.166626	0.263184	0.54541	0.969727	1	0.764648	0.921875	0.796875	0.608887	0.609375	0.535645	0.727051	1	0.956543	0.956543	0.206909	0.206909	0.384521	0.384521	0.333252	0.600098	0.600098	0.600098	0.620605	0.799805	0.75	0.272217	0.706055	1
ACH-000857	0.0314331	0.0219421	0	0.0117645	0	0	0	0.0380859	0.015152	0.121216	0.0447693	0.0698853	0.0178528	0.188965	0	0.103149	0.0969238	0.0629883	0.0414734	0	0.120361	0.118286	0.00645065	0.205078	0.275879	0.147705	0.368408	0.364014	0.236206	0.343018	0.0872803	0.133301	0.884277	0.932129	0.942383	0.0304871	0.0609741	0.432129	0.407471	0.418945	0.486572	0.236084	0.0675659	0.105286	0.0842896	0.0112991	0.0144119	0.0974121	0.706543
ACH-000858	0	0	0	0						1		0	0	1	0	1	0.0333252										1	1	0.649902	1	0.644531	0						1	1	0.238525	0	0.247681	0.245483		1	1			1
ACH-000859	0.59082	0.113892	0.159668	0.299561	0.270752	0.169434	0.104248	0.277344	0.220337	0.184692	0.214233	0.401611	0.253418	0.616211	0.255615	0.392578	0.388184	0.175781	0.289307	0.268311	0.535645	0.415527	0.575684	0.800781	0.846191	0.527832	0.833008	0.959473	0.867676	0.846191	0.627441	0.612793	0.853516	0.982422	0.936035	0.458496	0.441162	0.63916	0.582031	0.559082	0.723633	0.55127	0.436035	0.526855	0.597656	0.5625	0.290039	0.405029	0.949219
ACH-000860	0.633301	0	0.418701	0.652344	0.166626	0.117676	0.294189	0.399902		0.592773		0.609863	0.583496	0.842285	0.842285	0.945801	0.684082		0.674316	0.438965	0.634277	0.511719	0.466553	0.714355	0.899902	0.549805	1	0.864746	0.472168	0.811035	0.911621	0.70459	0.899902	1	0.975098	0.702637	0.783691	0.392822	0.357178	0.666504	0.777832	0.799805	0.799805	0.551758	0.970703	0.941406	0.345459	0.383057	0.976562
ACH-000861	0.922852	0.600098	0.40918	0.955566	0	0	0	0.107971	0.537598	0.792969	0.669922	0.0994873	0.151123	0.299561	0.0899048	0.375488	0.0575562	0	0.530762	0.300049	0	0.97998	0.992188	1	0.918457	0.666504	0.987793	0.912109	0.934082	1	0.72998	0.961426	0.992188	0.791992	0.740234	0.59082	0.751465	0.633301	0.507324	0.449951	0.740234	0.873047	0.564453	0.981934	0.959961	1	0.845703	0.841309	0.941406
ACH-000862	0.763184	0.289551	0.0499878	0.549805	0	0	0	0	0.413818	0.428467	0.310303	0.293213	0	0.116272	0	0	0	0.15625	0.133301	0	0	0.268311	0.191528	0.520996	0.651367	0.651367	0.696777	0.848633	0.807129	0.63623	0.754395	0.709473	0.977051	1	1	0.0757446	0.136353	0.275879	0.241333					1	0.307617	0.230713	0.25	0.509277	1
ACH-000863	0	0	0	0.555664	0	0.111084	0	0	0.0499878	0.59082	0.70752	0	0.411865	0.399902	0	0.399902	0	0	0	0	0		0.361816	0.361816	0.363525	0.0454407	0.484863	0.971191	0.353027	0.971191	0.353027	0.0999756	0	1	0.944336	0.260986	0			0	0.888672	0.888672	0.888672	0.56543			0.153809	0.354736	0.413086
ACH-000864	0.920898	0.763184	0.894531	0.789551	0.30957	0.666504	0.333252	0.307617	0.769043	0.744629	0.692383	0.941406	0.428467	0.737793	0.45166	0.721191	0.419434	0.117676	0.294189	0.353027	0.529297	0.97998	0.868652	0.983398	1	0.907227	0.930176	0.976562	0.951172	0.906738	1	1	0.90918	0.962891	0.781738	0.918945	0.945801	1	0.950195	0.703613	0.925781	1	1	0.856934	0.90625	0.871094	0.987305	0.821289	1
ACH-000865										0.995117									1	1	1	1	1	1								0.277588	1	1	1												1		1
ACH-000866										0.875		0.692871						0	1	1	1		0	1	0.98584	0.98584	1	1		1						0	1								0	0.00854492		0.561035	1
ACH-000867	0.846191	0.5	0.779785	0.693848	0.785645	0.361816	0.212769	0.0714111		0.625		0.256836	0.131592	0.815918	0.263184	0.815918	0.184204	0.315674	0.666504	0.549805	0.866699	0.95752	0.882324	0.896973	0.963379	0.804688	0.904785	1	0.799805	0.867676	0.850098	0.952148	0.950195	1	0.825195	0.943848	0.898926	0.771484	0.777832	0.600098	0.600098	0.866699	0.600098	0.897461	0.631348	0.894531	0.710449	0.666504	0.946289
ACH-000868	0.0869751	0.0652466	0.153809	0.11322	0.0975342	0.117676	0	0.117676	0.081604	0.25	0.140015	0.519531	0.172363	0.758789	0.293213	0.5	0.0517273	0.131592	0.310791	0.243286	0.486572	0.625	0.45459	0.79541	0.852539	0.705078	0.63916	0.672852	0.666504	0.894043	0.834961	0.862793	0.865723	0.983398	0.799805	0.557129	0.485596	0.741699	0.64502	0.567383	0.513672	0.702637	0.378418	0.542969	0.764648	0.617676	0.405273	0.471924	0.875
ACH-000869	1	0.806641	0.98291	0.98291	0.956543	1	0.63623	0.86377	1	0.730957	1	0.804688	0.849121	0.904297	0.945312	0.972656	0.547852	0.706055	0.485596	0.914062	0.942871	1	1	0.894043	0.95752	0.978516	0.905273	1	1	0.932617	1	0.780273	0.953125	0.921875	0.984375	0.856934	0.80957	0.95459	0.904785	1	0.899902	1	1	1	0.939453	0.90918	0.935547	0.878418	0.938477
ACH-000870	0.925781	0.444336	0.579102	0.739258	0.422119	0.130493	0.0434875	0.19043	0.733398	0.682617	0.466553	0.825195	0.535156	0.736816	0.508789	0.833496	0.473633	0.465576	0.543945	0.59668	0.714355	0.931152	0.770996	0.8125	0.893555	0.886719	0.929199	0.844727	0.855469	0.887695	0.868652	0.888672	0.969727	0.938965	0.933105	0.78418	0.649414	0.666504	0.888672	0.714355	0.90918	0.826172	0.681641	0.833496	0.791504	0.833496	0.650879	0.817383	0.987793
ACH-000871	0.5	0.363525	0.605957	0.878906	0.933105	0.63623	0.181763	0.714355	0.928711	0.87793	1	0.603027	0.210571	0.666504	0.263184	0.600098	0.0789185	0.533203	0.603027	0.661621	0.808594	0.952148	0.596191	0.609375	0.935059	0.876465	0.89209	0.959473	0.693848	0.89209	0.877441	0.975586	0.976562	0.891602	0.891602	0.732422	0.825684	0.875	0.625	1	1	0.720215	0.959961	0.799805	0.537598	0.887695	0.83252	0.740234	0.87793
ACH-000873						0	0	0					0	0	0	0.00517273	0		1	0	0																										1
ACH-000874	1	1	1	1	1	1	0.643066	1	1	0.853027	1	1	0.947266	1	0.947266	0.947266	1	0.799805	0.984375	0.70752	0.984375	0.974121	1	1	1	1	1	1	1	1	1	0.969727	0.989746	0.989746	0.989746	1	1			0.799805	1	1	1		0.0263214	0.842285	0.52002	0.899902	1
ACH-000875	0.928711	0.571289	0.509277	0.928711	0.75	0.708496	0.708496	1	0.416748	0.680664	0.5	0.533203	0.422119	0.666504	0.644531	0.799805	0.710938	0.764648	0.733398	0.822266	0.911133	0.5	0.711914	0.84668	0.729492	0.405518	0.96875	0.989746	0.918945	0.989746	0.688965	1	0.989258	0.967773	0.978516	0.632812	0.670898			1	1	0.8125	1	0.947266	1	0.734863	0.651367	0.787598	0.936035
ACH-000876	0	0	0.0120468	0.0240936	0.015152	0	0	0	0.027771	0.0357056	0.0285645	0	0.0121918	0.0493774	0.0121918	0.0487671	0	0.083313	0	0	0.00926208	0.451172	0.136353	0.176514	0.273926	0.119019	0.130981	0.448242	0.30957	0.244141	0.0243835	0.350098	0.271484	0.5	0.271484	0.0958862	0.150635	0.121216	0.0689697	0.348877	0.333252	0.0930176	0.139526	0.189697	0.142822	0.142822	0.147095	0.00971222	0.638184
ACH-000877	1	1	0.916504	0.916504	0.935547				0	0.888672	0	0.571289	0.604004	0.979004	0.770996	0.979004	0.916504	0.264648	0.939453	0.90918	0.969727	0.983398	0.70752	0.902344	0.969238	0.969238	0.824219	0.986816	1	1	1		1	1	0.947266	0.351807	0.777832	0.90918	0.90918	1	0.931152	1	1	1	0.95459	0.90918	0.424805	0.94043	0.988281
ACH-000878	0.898926	0.202515	0.328125	0.90625	0.239136	0.181763	0	0.323486	0.133301	0.256836	0	0.48584	0	0.166626	0.00990295	0.109985	0.0686035	0	0.356445	0.0100021	0.0400085	0.652832	0.734863	0.97998	0.946777	0.41333	0.97168	0.822266	0.759766	0.972168	0.734863	0.830078	0.688965	0.986328	0.959961	0.40625	0.65625	0.9375	0.625	0.785645	1	0.799805	0.965332	0.799805	0.723145	0.828125	0.458252	0.490479	0.986328
ACH-000879	0.153809	0.0263214	0.266602	0.0666504	0					0.300049		0.0270233	0.125	0.833496	0.208374	0.583496	0.333252		0.111084	0.055542	0.166626	0.408203	0.67627	0.911621	0.893066	0.571289	0.821289	0.620605	0.761719	0.827637	0.5	0.478271	0.947266	1	0.920898	0.387207	0.354736								0.235352	0.706055	0.220337	0.404541	0.929688
ACH-000880			0.666504	1	1	0.676758	0.439453	0.560547	0.833496	0.869629	0.722168	0.388916	0.138916	0.861328	0.166626	0.305664	0.277832	0.0999756	0.411865	0.529297	0.882324	0.893066	0.549805	0.950195	0.981934	0.964355	0.951172	1	1	1	1	0.86377	0.952148	1	1	1	0.833496			0.766602	0.931152	1	0.399902	1	1	1	0.89209	0.523926	0.960938
ACH-000881	0.217896	0.0256348	0.138428	0.169067	0.300049	0.0869751	0.0434875	0.19043	0.3125	0.609863	0.368408	0.0505066	0.117676	0.914062	0.605957	0.84375	0.848633	0	0.0322571	0.125	0.438477	0.487061	0.722168	0.907227	0.899902	0.600098	0.6875	0.632812	0.370361	0.612305	0.166626	0.86377	0.894531	0.888672	0.777832	0.531738	0.662598	0.449951	0.449951	0.769043	0.9375	0.8125	0.444336	0.777832	0.428467	0.414551	0.430176	0.377441	0.952637
ACH-000882	0.116272	0.0116272	0.0370483	0.0178528	0	0	0.0588379	0.0625	0.0908813	0.055542	0.333252	0.0163879	0.0545349	0.3396	0.0727539	0.1698	0.236328	0.0999756	0.253418	0.253418	0.186646	0.41748	0.25	0.416016	0.445557	0.228271	0.520996	0.426758	0.360107	0.306641	0.256836	0.25	0.585938	0.868652	0.717285	0.157349	0.185181	0.148193	0.119995	0.360107	0.26001	0.387695	0.23999	0.375	0.105286	0.131592	0.297607	0.222778	0.744141
ACH-000883	1	0.961426				0.555664	0.555664		1	0.866699	1	0.950195	0.745117	1	0.846191	0.884766	1					0.913086			0.90918	0.939453			0.45166		0.466553	0.976562	0.96875	0.9375	0.96875			1	0.692383					0.899902			0.98291	0.775879
ACH-000884									0		0.0107498																																		0	0		0.339844
ACH-000885	0.108704	0	0	0	0	0	0	0.428467	0.0869751	0.916504	0.625	0.119995	0.166626	0.235352	0.166626	0.055542	0.055542		0.0200043	0.0400085	0.0200043	0.0416565	0.404297	0.414795	0.772949	0.151489	0.649902	0.0731812	0.0178528	0.121948	0.0181885	0.126709	0.207275	0.518555	0.292725	0	0			0.0227203	0.0232544	0.0227203	0.162842	0.461426	0.0243835	0.0952148	0.219238	0.593262	1
ACH-000886	0.254883	0	0	0.5	0.0319214	0.0192261	0.0192261	0.0769043	0	0.346191	0.135132	0.417969	0.141479	0.613281	0.311279	0.403809	0.36792	0.0540466	0.542969	0.285645	0.457031	0.5	0.406006	0.564453	0.600098	0.337646	0.692383	0.850098	0.962891	1	0.64502	0.894043	0.935547	0.950195	0.928711	0.298828	0.528809	0.083313	0	0.754883	0.740234	0.5	0.580078	0.447998	0.827637	0.879395	0.457031	0.415283	1
ACH-000888	0.612793	0.5	0.135132	0.600098	0.458252	0.157837	0.210571	0.1875	0.766602	0.730469	0.766602	0.0522461	0.310303	0.75	0.233276	0.379395	0.199951	0.137939	0.268311	0.281982	0.151855	0.287354	0.734375	0.57666	0.877441	0.934082	0.718262	0.893555	0.744629	0.506348	0.799805	0.75	0.644043	1	0.933105	0.59082	0.727051	0.945801	0.973145	0.709473	0.300049	0.793945	0.555664	0.850098	0.571289	0.918457	0.462402	0.813965	1
ACH-000889	1	0.93457	0.911133	0.933105	1	0.75	0.8125	0.8125	1	0.785645	0.700195	0.973145	0.922852	0.942383	0.862793	0.961426	0.922852	0.953613	0.980957	0.980957	0.865234	0.954102	0.874023	0.946289	0.94873	0.923828	0.872559	0.964355	0.931152	1	1	0.919922	0.903809	0.975586	0.975586	0.952148	1	1	0.922852	0.973145	0.973145	1	1	1	1	1	0.838867	0.974121	0.992676
ACH-000890	0.756348	0.423096	0.345703	0.839355	0.804688	0.586426	0.25415	0.637695	0.905762	0.945801	0.807617	0.355957	0.590332	0.980957	0.600098	0.866699	0.342773	0.820312	0.651367	0.828125	0.716309	0.777832	0.716309	0.991699	0.95166	0.791992	0.943848	0.917969	0.96875	1	0.671387	1	1	1	0.887207	0.654297	0.705078	0.925781	0.796387	0.891113	0.770996	0.854004	0.9375	1	1	0.657227	0.380859	0.486328	1
ACH-000891	0.5	0.5	0.296387	0.555664	0.478271	0.25	0.0625	0.1875	0.629395	0.56543	0.678711	0.298584	0.0975342	0.487793	0.219482	0.399902	0.390137	0.444336	0.195068	0.121948	0.512207	0.719727	0.535156	0.929688	0.780762	0.561523	0.8125	0.895996	0.799805	0.833496	0.575195	0.948242	0.985352	0.970215	0.985352	0.643066	0.702148	0.384521	0.307617	0.833496	0.714355	0.952148	0.619141	0.714355	0.720215	0.720215	0.32959	0.564453	0.894043
ACH-000892																							0.99707	0.99707								1
ACH-000893	0.116638	0	0	0	0.0731812	0	0.0294189	0.0294189		0.520996		0.0494995	0.0263214	0.486572	0.135132	0.399902	0.105286		0.384521	0.105286	0.631348	0.771484	0.465088	0.720703	0.862305	0.586426	0.804688	0.953613	0.928711	0.697754	0.856934	0.875	0.950195	0.975098	0.974121	0.434814	0.42041	0.399902	0.315674	1	0.0625	0.764648	0.4375	0.75	0.736816	0.894531	0.279053	0.496582	0.902344
ACH-000894	0.303467	0.169678	0.0899048	0.202271	0.00403214	0.0059166	0.0059166	0.0828247	0.0579834	0.265869	0.453857	0.279541	0.141113	0.381348	0.110413	0.368164	0.116577	0	0	0.192261	0.217896	0.322998	0.345459	0.660645	0.530762	0.336182	0.263672	0.253906	0.00934601	0.310059	0.0625	0.161011	0.687012	0.830566	0.789551	0.199951	0.215942	0.30127	0	0.816895	0.725586	0.597656	0.28833	0.583496	0.199951	0.151855	0.140015	0.0828247	0.757812
ACH-000895	0.716797	0.11322	0.40918	0.45459	0.950195					0.888672		0.030304	0	0.199951	0	0	0	0	0	0	0.152222	0.399902	0.644531	0.93457	0.977539	0.978027	0.938965	0.958984	1	0.75	0.555664	1	1	1	1			0.700195	0.600098	0.833496	0.833496	0.833496	0.833496		0.952148	0.521973	0.102295	0.321777	1
ACH-000896	0	0			0	0	0	0.111084		0.119995		0.0140839	0	0.677246	0.258057	0.467773	0	0.0908813	0	0	0	0.435303	0	0.5	0.791016	0.161743	0.631348	0.615234	0.172363	0.615234	0.172363	0.3479	1	1	0.98877	0.0169525	0.0678101	0	0					0.625	0.542969	0.142822	0.133911	0.298096	0.805664
ACH-000897	0	0	0.0163879	0	0.208374	0.166626	0	0.125	0.956543	0.184204	0.56543	0.234375	0.131592	0.5	0.0789185	0.394775	0.157837	0	0	0	0.340332	0.192993	0.410156	0.102539	0.510742	0.521973	0.622559	0.842285	0.774902	0.789551	0.243896	0.199951	0.791504	1	1	0.376709	0.376709			0.709961	0.706055	0.709961	0.485352	0.25	0.269287	0.269287	0.402588	0.350098	0.860352
ACH-000898	1	0	0.90918			0	0	0.5		0.973633		0.0322571	0.055542	0.944336	0.527832	0.972168	0.527832		0	0	0.529297	0.666504	1	1	1	0.706055	0.720215	1		0.839844			0.680176	1	0.799805			0.153809	0.153809								0.884766	0.96875	1
ACH-000899	0.0147095	0.0147095			0	0	0.25	0	0	0.294189	0		0.0416565	0.0416565	0.0416565	0.0416565	0.0416565		0	0	0	0.5	0.25	0.125	1	0	0.643066	0.512207	0.333252	0.658691	0.0666504	0.25								0.151489	0.0606079	0.0606079	0.151489	0.238037			0.151489	0	0.565918
ACH-000900	0.90918	0.333252	0.789551	0.789551	0.45459		0.5	1				0.947266	0.700195	1	0.899902	1	0.799805		0.82373	0.875	0.9375	0.899902	0.888672	0.944336	0.964355	0.821289	0.827637	1	0.922852	0.785645	1	0.941406	0.967773	0.967773	0.967773	0.799805	0.899902	1	1	0.368408	0.947266	0.947266	0.894531	0.600098			0.866699	0.903809	0.936035
ACH-000901	0.26001	0	0.162842	0.37207	0.108704	0.181763	0.0454407	0.142822	0.428467	0.277832	0.142822	0	0.0158691	0.571289	0.158691	0.126953	0.0634766	0.0357056	0.0153809	0.03125	0.193604	0.744141	0.157837	0.931152	0.527832	0.777832	0.582031	0.792969	0.826172	0.758789	0.45459	0.660156	1	0.866699	0.90625	0.561035	0.243896	0.449951	0.600098	0.5	0.75	0.5	0	0.649902	0.580566	0.290283	0.219238	0.516113	1
ACH-000903			0	0	0	0	0	0				0	0	0	0	0	0						0	0.0869751	0	0			0.529297		0.0294189	0				0	0	0	0					0			0.253906	0.39209
ACH-000904	0.941406	0.764648	0.871582	0.846191	0.600098				1	0.875	1	0.959961	0.457031	0.914062	0.828613	0.914062	0.785645	0.722168	1	0.916504	1	1	0.879883	0.879883	0.955566	0.977539	0.986328	0.864746	0.80957	0.864746	1	1	1	1	1	0.959961	0.560059	0.922852	0.846191	1	0.799805	0.959961	0.875	0.6875	0.605469	0.973633	0.893066	0.861816	0.947266
ACH-000905	0.980957	0.5	0.224487	0.652832	0	0.28125	0.1875	0.34375	0.410156	0.90625	0.407227	0.0222168	0	0.54248	0	0.22876	0.00839996	0	0.194946	0.0169525	0.194946	0.244995	0.635254	0.422607	0.779297	0.637207	0.844238	0.537598	0.708496	0.53125	0.339111	0.547852	0.45459	0.45459	0.0294189	0	0.452637	1	1	0.871582	0.975098	0.975098	0.128174	1	0	0	0.0139847	0.275391	0.859863
ACH-000906	0.0855713	0.0179443	0.00897217	0.0178528	0.00640869	0	0	0.0658569	0.106079	0.483887	0.149292	0.164551	0.291504	0.388672	0.422852	0.393066	0.302979	0.0449524	0.22644	0.132446	0.277832	0.117676	0.0153809	0.172607	0.365723	0.206177	0.475098	0.264404	0.0704346	0.326904	0.052124	0.388428	0.57666	0.902344	0.692871	0.270264	0.270264	0.248535	0.256104	0.314209	0.320801	0.26416	0.228516	0.158569	0.140625	0.0551147	0.125488	0.122009	0.918457
ACH-000907	0.666504	0.277832	0.284424	0.608887	0.421143	0.272705	0.363525	0.5	0.933105	0.811523	1	0.761719	0.208984	0.891113	0.509766	0.540039	0.290039	0.318115	0.5	0.3125	0.416748	0.580078	0.788086	0.883301	0.951172	0.813965	0.841797	0.935059	1	0.950195	0.395264	0.961426	0.91748	0.899902	0.975098	0.265381	0.295898	0.956543	0.869629	0.975586	1	0.804688	0.683105	0.950195	0.489258	0.425537	0.493652	0.414795	1
ACH-000908	0.880859	0.0476074	0.040802	0.0416565	0.0263214	0	0	0.0370483	0.916504	0.95459	1	0.022995	0	0.0508423	0.0678101	0.0508423	0.033905	0.111084	0.0724487	0.0298462	0.0447693	0.588867	0.977051	0.977051	0.876953	0.600098	0.920898	0.973633	0.901367	0.947266	0.943848	0.358398	0.934082	0.973633	0.973633	0.525391	0.152588	0	0	0.799805	0.966797	0.966797	1	0.914062	0.899902	0.5	0.0714111	0.541992	0.972168
ACH-000909	0.625	0.25	0.199951	0.449951	0	0	0.0769043	0	0.45459		0.818359	0.217407	0.448242	0.586426	0.275879	0.586426	0.0344849	0	0.357178	0.464355	0.285645	0.965332	0.63623	1	1	0.952148	1	1	0.706055	0.80957	0.706055	1	1	0.75	1	0.380859	0.666504			1	1	0.875	1	0.90918	0.181763	0.90918	0.491455	0.564453	0.757812
ACH-000910										0.0284119												0			1	0.997559												0.0526428	0					0.99707				0
ACH-000911	0.616211	0.418701	0.161865	0.39624	0.357178	0.0333252	0.0666504	0	0.111084	0.473633	0.111084	0.0434875	0.214233	0.585449	0.390137	0.487793	0	0.181763	0.549805	0.425049	0.620117	0.281738	0.709473	0.914062	0.974121	0.542969	0.972168	0.93457	0.956543	0.990723	0.82959	0.733398	0.930176	0.960449	0.951172	0.701172	0.598145	0.648438	0.513672	0.321533	0.366699	0.344727	0.399902	0.549805	0.866699	0.774414	0.301514	0.655273	0.945312
ACH-000912	0.927246	0.763672	0.941895	0.985352	0.722168	0.439941	0.399902	0.199951	0.846191	0.945801	0.846191	0.666504	0.820801	0.925293	0.507324	0.925293	0.775879	0.727051	0.538574	0.827148	0.862793	0.988281	0.980469	1	0.938965	0.956543	0.977539	0.966797	1	0.966797	1	0.989258	0.891602	0.95166	0.927734	0.90918	0.939941	0.950195	0.950195	1	0.983398	1	0.95166	1	1	1	0.977051	0.993164	0.973145
ACH-000913	0.259277	0	0.377686	0.955566	0.47998	0	0	0.266602	0.0384521	0.564453	0.577148	0.0220642	0	0.197144	0	0	0.069458	0.0192261	0.643066	0.0103073	0.669922	0.245605	0.238892	0.965332	0.946289	0.838867	0.986816	0.594727	0.839355	0.706543	0.856934	0.714355	0.979492	1	0.958984	0.518066	0.910645	0.85498	0.768066	0.12384	1	0.780762	0.990723	0.515137	0.266602	0.866699	0.230103	0.393799	1
ACH-000914	0.799805	0.466553	1	1	0.59082	0.975098	0.975098	0.975098	0.973145	0.899902	0.945801	0.0856934	1	1	1	1	0.5625	0.764648	0.928711	0.928711	0.928711	0.964355	0.321533	0.964355	1	1	0.98291	1	1	1	1	1	0.660156	0.97998	1			0.928711	1	1	1	1	1	1	0.90918	0.90918	0.887695	0.989746	1
ACH-000915										0.515137									0	0	0.742188	0.0571289			0	0	0.620117	1		1																			1
ACH-000916	0.480713	0	0.0585632	0.0625	0.494141	0.240479	0.240479	0.705078	0.333252	0.684082	0.57373	0	0.977051	1	0	0	0.522949	0.6875				0.856934	0.207275	0.101196	0.474609	0.483398	1	1	1	1	1	0.958496	1	1	1	0.18335	0.199951							0.729004	1	0	1	0.505859	1
ACH-000917	0.734863	0.0344849	0.152954	0.223511	0.0357056	0.0454407	0.0454407	0.0476074	0.227295	0.159058	0.181763	0.641602	0.0869751	0.753418	0.0142822	0.25708	0.185669	0.0178528	0.030304	0.00757599	0.0681763	0.654297	0.439697	0.929688	0.835938	0.439697	0.509277	0.842285	0.725098	0.780762	0.662598	0.842285	0.93457	0.991699	0.991699	0.312988	0.442627	0.358887	0.157837	0.341553	0.731934	0.475098	0.438965	0.4375	0.729004	0.949219	0.41748	0.263916	0.941406
ACH-000918	0.666504	0.888672							0.833496	0.899902	1	0.981934	1	1	0.944336	0.777832	0.944336					0.956543	1	1	1	1	0.974121	0.974121	0.818359	0.94873	0.833496	1	1	0.875	0.969727	1	1							1	0.466553	0.766602	0.970215	0.980469	1
ACH-000919																									0	0												0.000926018	0.0009408						0	0			0
ACH-000920	1	1	1	1		0.933105	0.333252	0.933105	1	1	1	1	0.818359	0.969727	0.394043	0.969727	0.757812	0.714355	1	1	1	1	1	1	1	1	1	1	1	1	1	1	0.952148	0.799805	1	1	1	1	1	1	1	1	1	1			1	1	0.979492
ACH-000921	0.185181	0.0740967			0.0499878	0	0.0370483	0	0.353027		0.235352	0.0454407	0.125	0.25	0.125	0.125	0		0.5	0.125	0.25	0.449951	0.111084	0.888672	0.772949	0.772949	0.916504	0.791504	0.931152	0.833496	0.714355	0.646973	1	1	0.875					0.916504	0.916504	1	0.833496				0.588379	0.484375	0.631348
ACH-000922	0.549805	0.25	0.95459	1		0.875	0.875	0.875	0.913086	0.965332	1	0.978516	0.915527	0.845215	0.929688	0.873047	0.774414		1	1	1	0.950195	1	0.913086	1	1	1	0.931152	1	0.98291	1	1	1	1	0.962891	1	1			1	1	1	0.90918	1	0.371338	1	0.991699	0.98584	1
ACH-000923	1	0.941406	0.941406	0.941406	0.941406	0.939453	0.9375	0.96875	0.888672	0.620605	0.842285	0.98291	0.833496	0.904785	0.880859	0.904785	0.833496		1	0.967773	0.838867	1	1	0.921387	0.976562	0.988281	0.945801	0.920898	0.861328	0.947266	0.972168	0.976074	0.944336	0.914062	0.944336	0.882324	0.882324	0.90918	1	0.959961	1	1	1	1	0.964355	1	0.978027	0.969238	1
ACH-000924	0.144897	0.0724487	0	0.206909	0.114929	0.0400085	0.0405273	0.0133362	0.413086	0.0350952	0.456543	0.423828	0	0.22644	0	0.1698	0.179199	0.102539	0.123291	0.178101	0.191772	0.338623	0.0561829	0.42041	0.980469	0.235352	0.558105	0.343506	0.719238	0.737305	0.543945	0.466553	0.951172	0.987793	0.94043	0.172363	0.146606	0.708496	0.708496	0.486572	0.638672	0.621582	0.5	0.449951	0.333252	0	0.0170441	0.0292358	0.89502
ACH-000925	0.222168	0	1	1	0.055542	0	0.111084	0.230713	0.25	0.350098	0.375	0.0714111	0.020401	0.0208282	0.020401	0.229126	0.224487	0.285645	0.361084	0.027771	0.027771	0.472656	0.302002	0.358398	0.610352	0.610352	0.30957	0.477295	0.558594	0.522949	0.205933	0.740723	0.576172	0.98291	0.98291	0.205078	0.0769043			0.318115	0.40918	0.40918	0.0454407	0.606934	0.703613	0.592773	0.185181	0.480713	1
ACH-000926	1	1			0	0.125	0.125	0.28125	0.125		0.777832	0.235352	0.899902	0.899902	0.899902	0.899902	0.899902						1	1	1	0.588379			1		1							0	0	1	1	0.888672	0	0.083313	1	0.25	0.75	0.186401	1
ACH-000927	0.856934	0.888672	0.802246	0.852051	0.692383	1	0.733398	0.856934	0.666504	0.843262	1	0.714355	0.444336	0.907227	0.759277	0.870605	0.52832	0.603027	0.78125	0.65625	0.96875	0.970215	0.953125	1	1	0.869141	0.927246	1	0.977539	1	0.777832	0.97998	0.988281	0.964844	0.977051	0.95459	0.861328	1	0.792969	1	1	0.805664	0.972168	1	0.896484	0.965332	0.958984	0.838379	0.925293
ACH-000928	0.057312	0.00637054	0	0	0	0	0	0.243286	0.0238037	0.0985107	0.0476074	0.0116272	0.0612183	0.0411377	0.114258	0.0901489	0.151001	0	0.0272369	0	0.0195312	0.467773	0.311035	0.464844	0.263184	0.203003	0.453857	0.402588	0.693848	0.25415	0.0489502	0.0927734	0.368164	0.739746	0.544922	0.103455	0.206909	0	0.0447693	0.169434	0.362061	0.0169525	0.169434	0.230713	0.0479126	0.0598755	0.0465698	0.256104	0.710938
ACH-000929	0.122375	0.029541	0	0	0.0504456	0.0083313	0.0165253	0.0247955	0.0217438	0.111084	0.0719604	0.0775146	0.0517578	0.254883	0.0626831	0.152588	0.169434	0.0135117	0.0202026	0.0583801	0.108887	0.162354	0.103394	0.353271	0.426758	0.303223	0.268311	0.64209	0.489014	0.589355	0.0846558	0.494629	0.757812	0.914551	0.831055	0.0999756	0.0470276	0.0682983	0.0584412	0.227295	0.163696	0.149292	0.0863647	0.509766	0.120361	0.14624	0.230469	0.332275	0.772461
ACH-000930	0.655273	0.103455	0.304443	0.608887	0	0.0322571	0.193604	0.129028	0.368408	0.555664	0.368408	0.346191	0.193604	0.774414	0.0645142	0.290283	0.379395	0.0625	0.605469	0.526367	0.473633	0.212158	0.297852	0.702148	0.489258	0.617188	0.629395	0.931152	1	0.862305	0.333252	0.703613	0.774902	0.829102	1	0.5	0.5	1	0.606934	1	1	0.769043	0.583496	0.449951	0.62793	0.357178	0.45459	0.122437	0.856934
ACH-000931	0	0.0285645	0.0384521	0.115356						0.25		0.0697632	0.03125	0.8125	0.15625	0.34375	0.125		0.0222168	0.0222168	0.155518	0.672852	0.434814	0.652344	0.882324	0.529297	0.782715	0.739258		0.782715		0.363525	0.714355	1	0.799805	0.342773	0.342773	0.666504	0.222168						0.82373	0.82373	0.289551	0.287109	0.75
ACH-000932	0.40918	0.136353	0.916504	0.916504	1	0.916504	0.5	0.583496		1		0.960938	0.745605	0.881348	0.98291	1	0.98291	0.615234	0.611328	0.5	1	0.916504	0.856934	1	1	0.97998	1	0.967773	1	0.967773	0.922852	1	1	1	1	0.882324	1			0.95459	0.956543	1	0.95459		1	1	0.856934	0.974609	1
ACH-000933	0.391357	0.147095	0.153809	0.179443	0.129028	0.170776	0.121948	0.351318	0.25	0.462646	0.461426	0.273926	0.260986	0.717285	0.630371	0.54541	0.434814	0.160767	0.571289	0.358887	0.487061	0.229492	0.328613	0.729492	0.507812	0.387207	0.770996	0.884766	0.833496	0.754883	0.666504	0.931152	0.734863	0.958984	0.672852	0.537598	0.5	0.342773	0.193604	0.521973	0.714355	0.340332	0.541504	0.86377	0.916504	0.771484	0.224854	0.522461	0.913086
ACH-000934	0.439453	0.0999756	0.354004	0.543945	0.759766	0.263184	0.210571	0.333252	0.571289	0.674805	0.928711	0.438721	0.241333	0.758789	0.448242	0.655273	0.310303	0.580566	0.532227	0.766113	0.818359	0.894043	0.952637	0.962402	0.977051	1	0.960938	0.872559	0.888672	0.931152	1	0.700195	0.916016	0.947754	0.989746	0.847656	0.98291	0		0.488281	0.651367	0.785645	0.512207	0.646973	0.879395	0.913574	0.755371	0.597168	0.959961
ACH-000935	0.111084	0.0138855	0	0	0.176514	0.0625	0	0	0.125	0.333252	0.25	0.35083	0.166626	0.777832	0.388916	0.25	0.133301		0.217407	0.0952148	0	0.133301	0.260986	0.511719	0.67627	0.722168	0.333252	0.657715	0.0689697	0.487061	0.199951	0.439941	0.888672	0.821289	0.148193	0	0.0454407							0.818359	0.153809	0	0.15625	0.165161	0.964355
ACH-000936	0.288818	0.0666504	0.152222	0.148926	0	0.125	0	0	0.307617	0.333252	0.259277	0.328369	0.0882568	0.731445	0.147095	0.264648	0.161743	0.0499878	0.145508	0.272705	0.509277	0.567383	0.96875	0.953125	0.856934	0.589355	0.90918	0.962891	0.941406	0.981445	0.882324	0.793945	0.843262	0.97998	0.97998	0.473633	0.473633	0.875	0.799805	0.727051	0.90918	0.818359	0.63623	0.799805	0.944336	0.777832	0.542969	0.717773	0.960938
ACH-000937	1	0.971191	0.984375	0.984375	1	0.973633	0.763184	0.736816	1	0.981445	1	1	0.911133	0.933105	0.966797	0.933105	0.875	0.939453	0.905273	1	1	0.893066	0.611328	0.972656	0.944824	0.935547	0.976562	0.977051	0.967773	0.945312	1	0.97998	0.969727	0.835938	0.941406	0.990234	0.990234	0.96875	1	0.643066	0.785645	0.758789	0.724121	0.826172	0.40625	0.526367	0.885254	0.96875	0.993164
ACH-000938	1	0.888672	0.95459	0.95459	0.928711					0.941406		1	0.833496	0.916504	0.916504	0.916504	0.833496	0.384521	1	0.896484	1	1	0.782715	0.956543	0.799805	1	1	1	0.833496	0.882324	0.958496	1	1	1	1	0.959961	1	1	1	1	1	1	1	1	0.799805	1	0.941406	1	0.964355
ACH-000939	0.862305	0.399902	0.399902	0.919922	0.700195	0.264648	0.147095	0.117676	0.956543	0.75	0.772949	0.0416565	0.5	1	0.799805	0.933105	0.666504	0.928711	0.473633	0.405518	0.945801	0.913086	0.904785	0.952148	0.968262	0.92041	0.970703	0.90918	0.941406	0.893066	0.941406	1	0.933105	0.966797	0.966797	0.833496	1	1	1	1	1	1	1	0.962891	1	1	0.964844	0.862305	0.943359
ACH-000940	0.65918	0.363525	0.387207	0.532227	0.177246	0.166626	0	0	0.700195	0.551758	0.75	0	0.305664	0.805664	0.152832	0.666504	0.555664	0.157837	0.972168	0.833496	0.611328	0.722168	0.709473	1	0.928223	0.764648	0.924805	0.976562	1	0.767578	1	1	1	1	0.935547	0.90625	0.890625			1	0.846191	0.814941	0.592773	0.875	0.511719	0.418701	0.509277	0.76123	1
ACH-000941	0.325684	0.266602	0.245605	0.789551	0	0.0908813	0.0888672	0.333252		1		0.121948	0.363525	0.981934	0.399902	0.54541	0.927246	0.333252	0.310303	0	0.0344849	0.5	0.706055	0.970215	1	0.469482	0.838867	0.967773	0.89209	1	0.675781	1	0.780762	0.986328	0.986328	0.733398	0.986816	0.346191	0.23999					1	0.5	0.5	0.0470581	0.943359	0.961426
ACH-000942	1	0.952148	0.956543	0.956543	1	0.950195	0.899902	0.950195	1	0.961426	1	0.950195	0.880859	1	1	0.880859	0.952148		0.911621	0.911621	0.853027	0.906738	0.846191	1	1	1	1	1		1			1	1	0.96875	0.611328	1	1	1	0.922852	0.769043	1	1	1	0.558594	0.117676	0.944336	0.954102	1
ACH-000943	0.432373	0.432373	0.342529	0.421143	0.26001	0.360107	0.360107	0.5	0.321533	0.822754	0.566895	0.674805	0.605957	0.955078	0.791016	0.775879	0.686523	0.314209	0.513672	0.563477	0.791504	0.775391	0.688477	0.856934	0.936523	0.784668	0.910645	0.859863	0.976074	0.807129	0.928711	0.849121	0.972168	0.876953	0.821777	0.660156	0.731934	0.655273	0.678711	0.75	0.947266	0.934082	0.75	1	0.685547	0.706055	0.439697	0.681152	0.991211
ACH-000944	0.838867	0.838867	0.963379	0.962891		0.769043	1	0.615234		0.878906		0.942871	0.978516	0.978516	0.978516	0.978516	0.956543	0.931152	0.943359	0.903809	0.980957	1	0.640137	0.959961	0.930176	0.90918	1	1	0.922852	0.951172	0.703613	1	1	0.938965	1	0.680664	0.98584	0.947266	0.789551	1	1	1	0.777832	1	0.551758	0.827637	0.986816	0.868652	0.967773
ACH-000945	0.333252	0.136353	0.314697	0.388916	0.371338	0.473633	0.210571	0.421143	0.975586	0.727051	0.683105	0.49585	0.602051	0.84082	0.852051	0.896484	0.71582	0.464355	0.617188	0.5	0.766113	0.85498	0.751465	0.833496	0.864746	0.835938	0.826172	0.852051	0.848145	0.863281	0.746094	0.788574	0.905273	0.971191	0.913086	0.824219	0.895508	0.848633	0.848633	0.844727	0.850098	0.866699	0.847656	0.726074	0.743652	0.769043	0.466553	0.812012	0.98877
ACH-000946	0.555664	0	0.0163879	0.112915	0	0.121216	0	0.030304	0.777832	0.588379	0.75	0.399902	0.260986	0.608887	0.17395	0.130493	0.0434875	0.277832	0.083313	0.083313	0.444336	0.769043	0.600098	1	0.972168	0.805664	0.703613	0.796387	0.73584	1	0.811523	1	1	1	0.893066	0.353027	0.413818	0	0	0.888672	0.947266	0.894531	0.944336	1	0.594727	0.945801	0.253906	0.844238	0.987305
ACH-000947	0.235352	0.0340881	0.403076	0.268555	0.333252	0.350098	0	0.300049	0.764648	0.46875	0.28125	0.174561	0.428467	0.942871	0.399902	0.571289	0.483887	0.473633	0.651367	0.605957	0.825195	0.75	0.948242	0.927246	0.881348	0.949219	0.862305	0.899902	0.84375	0.913574	0.54834	0.804688	0.958496	0.942383	0.769043	0.712402	0.831055	0.692383	0.692383	0.643066	1	1	0.643066		0.720215	0.846191	0.637207	0.754883	0.945801
ACH-000948	0.029129	0.00971222	0.0112381	0.0112381	0	0.0416565	0	0.166626		0.253418		0.120789	0.0333252	0.111084	0	0	0.0222168	0.0333252	0.0307617	0	0	0.299316	0.104675	0.172363	0.402832	0.172607	0.554688	0.756836	0.54541	0.783691	0.116882	0.130493	0.94873	0.897461	0.708984	0.36499	0.491943	0.117676	0	0.0196075	0.0196075	0.0196075	0.0192261	0.276611	0.293213	0	0.12207	0.0214996	0.862793
ACH-000949	0.842285	0.344727	0.276611	0.625	0.111084	0	0.0625	0.125	0.631348	0.675781	0.473633	0.0428467	0.212769	0.276611	0.0212708	0.260986	0.0212708	0	0.0192261	0.0588379	0.0980225	0.35376	0.256836	0.598145	0.573242	0.146118	0.731934	0.928711	0.93457	0.951172	0.645996	0.483887	0.727051	0.75	0.835449	0.578125	0.671875	0.620605	0.344727	0.666504	0.0952148	0.238037	0.333252	0.473633	0.899902	0.75	0.223511	0.873047	0.977051
ACH-000950	0.214233	0.0235291	0.0400085	0.0128174	0.125	0	0	0.0999756	0.272705	0.135132	0.272705	0.0270233	0.0256348	0.135132	0.0128174	0.0519409	0.0129852	0.0227203	0	0.0119019	0.0714111	0.43335	0.241943	0.624023	0.795898	0.571289	0.5	0.872559	0.877441	0.851562	0.346924	0.6875	0.982422	1	0.956543	0.29126	0.339844	0.114258	0.228516	0.268311	0.333252	0.523926	0.452393	0.166626	0.199951	0.300049	0.331055	0.39502	0.980957
ACH-000951	0.179443	0	0	0	0.166626	0.0384521	0.0384521	0.0384521	0.199951	0.646973	0.666504	0.199951	0.030304	0.0625	0.030304	0.0908813	0.0908813	0.0625	0.174561	0.0806274	0.233276	0.466064	0.577148	0.865234	0.559082	0.393555	0.560059	0.431396	0.666504	0.720215	0.333252	0.690918	0.561523	0.726074	0.46582	0.452881	0.295166	0.199951	0.315674	0.413818	0.655273	0.551758	0.206909	0.105286	0.526367	0.421143	0.311768	0.19812	0.832031
ACH-000952			0.0588379	0.0769043	0.0588379	0.15625	0.03125	0.25				0.0416565	0.0625	0.125	0.0625	0.0625	0	0				0.263184	0.239136	0.478271	0.5	0.148193	0.399902	0.515137	0.508789	0.818359	0.0178528	0.605469	0.785645	0.928711	0.928711	0.6875	0.0625			0	0	0	0		0	0.0869751	0.0153809	0.0319214	0.90625
ACH-000953	0.87793	0.976074	0.8125	1					0.947266	0.875	1	0.915527	0.769043	0.984375	0.784668	0.799805	0.784668	0.852051	0.976562	0.976562	0.860352	1	0.804199	0.771973	0.910156	0.921387	1	1	0.974609	0.977539	1	1	1	1	0.910156	1	1	1	1	0.952148	1	1	1	0.9375	0.285645	0.428467	0.980469	0.945801	0.963867
ACH-000954	0.596191	0.115356	0.245239	0.868164	0.769043	0.25708	0.529297	0.571289		1		0.0925903	0.561035	0.914551	0.561035	0.414551	0.683105	0.0599976	0.491455	0.819824	0.868652	0.789551	0.860352	0.755859	1	0.627441	0.772949	1	1	1	1	0.96875	0.983398	1	0.615234	1	0.777832	1	0.716797	0.217407	0.0666504	0.630371	0.399902	0.882324	0.395264	0.906738	0.839844	0.558594	0.992676
ACH-000955	1	0.25	1	0.944336		0.875	0.875	0.125		1		0.625	0	0.111084	0	0	0	0	0.0526428	0	0.342041	0.848633	0.681641	0.772949	1	0.741699	1	0.730957		0.922852		0.272705	0.90918	0.90918	0.833496	0.888672	1							1	0.839844	0.839844	0.630859	0.86084	0.974121
ACH-000956	0.297363	0.0270233	0.882324	0.353027	0.736816	0	0	0.222168	0.777832	0.235352	0.911133	0.280029	0.407471	1	0.256104	0.609863	0.317139	0.133301	0.036377	0.537109	0.814941	0.783691	0.977051	0.772949	1	0.788086	1	0.641113	0.769043	0.641113	0.641113	1	0.615234	1	1	1	0.859375	0.959961	0.959961	1	0.727051	1	0	0.63623	0.941406	0.646973	0.533203	0.845215	0.97998
ACH-000957	0.771484	0.571289	0.125	0.346924	0	0	0.0588379	0.4375		0.515137	0.75	0.0326233	0	0	0.0227203	0.0908813	0	0	0.0129852	0.0389709	0.233765	0.083313	0.214844	0.396729	0.518555	0.236328	0.35791	0.392822	0.523926	0.5	0.261963	0.787109	0.91748	0.988281	0.941406	0.274902	0.0999756	0	0	0.600098	0.657227	0.611328	0.714355	1	0.5	0.680176	0.164185	0.11615	0.962891
ACH-000958	0.808594	0.148926	0.452393	0.48877	0.722168	0.541504	0.560059	0.47998	0.785645	0.866699	1	0.424316	0.25	0.677246	0.34375	0.625	0.125	0.199951	0.826172	0.717285	0.869629	0.974121	0.888672	0.95166	0.970215	0.985352	0.895508	0.952148	0.958984	1	0.979492	1	1	1	0.987793	0.917969	0.986328	0.805664	0.513672	0.75	0.534668	0.977051	0.883789	1	0.799805	0.759766	0.590332	0.572266	0.973145
ACH-000959	0.342773	0.027771	0.193604	0.774414	0.672852	0.0869751	0	0.0434875	0.428467	0.54541	0.655273	0.108093	0	0.521973	0	0.434814	0.0869751	0.307617	0.0249939	0.0249939	0.175049	0.631348	0.540527	0.621582	0.90918	0.799805	1	0.9375	0.971191	0.854004	0.542969	0.837402	0.780273	0.951172	0.94873	0.280029	0.47998	0.933105	0.933105	0.700195	0.677246	0.612793	0.600098	0.864746	0.941406	0.764648	0.298584	0.314209	0.841309
ACH-000960	0.967773	0.838867	1	1		1	1	1	1	0.943359	1	0.962402	0.988281	0.919434	0.988281	0.988281	0.954102	0.895996	0.875	0.950195	0.950195	0.970215	0.950195	0.990234	0.990234	0.990234	0.970215	1	1	1	1	0.986328	0.992676	0.977539	1	0.855957	0.978516	1	1	0.978516	0.958496	0.958496	0.916504	0.947266	0.70459	1	0.987305	1	0.995117
ACH-000961																		1
ACH-000962	0.659668	0.148926	0.170166	0.224487	0.0999756	0.0588379	0.235352	0.3125	0.882324	0.754883	0.685547	0.802246	0.638184	0.872559	0.489258	0.82959	0.489258	0.348877	0.914062	0.628418	0.441162	0.959961	0.586426	1	1	0.814941	0.961426	0.893066	0.972168	0.856934	0.685547	0.774414	1	0.933105	0.838867	0.660156	0.807617	0.706055	0.529297	0.694336	0.971191	0.894531	0.777832		0.449951	0.850098	0.60791	0.541016	0.921387
ACH-000963	0.958496	0.916504	0.976074	0.666504	0.969727	0.833496	0.888672	0.944336		0.90625		0.00602341	0	0.083313	0.0161285	0.0166626	0.0322571	0.03125	0.0140839	0	0.0140839	0.833496	0.775879	0.719238	0.970703	0.92627	0.907227	0.894531	1	0.947266	1	0.842285	1	1	0.974121	0.766602	0.966797	0.952148	0.952148					1	1	1	0.65332	0.864746	1
ACH-000964	0.98877	1	0.956543	0.955566	0.97998	0.789551	0.789551	1	0.962891	1		1						1	0.875	0.875	0.875	1			0.913086	0.956543	0.979004	0.938965	0.975098	0.979492	0.5625	1				1	1			1	1	1	1		0	0	1	0.896484	1
ACH-000965	1	0.4375			0.666504	0.291748	0	0.833496	0.476074	0.700195	0.619141	0.17395	0.722168	0.916504	0.666504	0.722168	0.583496	0.125	0.384521	0.384521	0.577148	0.741211	0.938965	0.979492	1	0.924316	1	0.974121	0.883301	0.974121	0.803223	1	0.964355	1	0.928711	0.949219	0.961914	0.9375	0.9375	0.977539	0.955566	0.911133	0.822266	0.972168	0.710449	0.789551	0.819336	0.732422	0.913574
ACH-000966	0.24353	0.0722656	0.149414	0.0246887	0.399902	0	0.0243835	0	0.1875	0.574707	0.4375	0.103149	0.140381	0.465576	0.0172424	0.245605	0.0701904	0	0.238525	0.174316	0.375	0.567871	0.579102	0.824219	0.841797	0.461426	0.710449	0.847168	0.755371	0.695312	0.652344	0.5625	0.723145	0.86377	0.727051	0.579102	0.621582	0.720215	0.600098	0.5	0.210571	0.473633	0.263184	0.700195	0.580078	0.461426	0.481201	0.663574	0.937012
ACH-000967	0	0	0.0322571	0.0645142	0.159058	0.399902	0.0499878	0.199951	0.260986	0.0400085	0.608887	0	0.0714111	0.428467	0.0714111	0.0714111	0.285645	0	0	0	0.0666504	0.285645	0.894531	0.947266	0.482666	0.586426	0.714355	0.567383	1	0.783691	0.833496	0.285645				0.655273	0.0344849	0.181763	0.399902	1	1	0.458252	1		0	0	0.0666504	0.125	0.833496
ACH-000968	0.26001	0	0.431885	0.489258	0.17395	0	0	0	0.899902	0.655762	0.90918	0.12085	0.260986	0.5	0.318115	0.304443	0.521973	0.181763	0.600098	0.436279	0.428467	0.43042	0.321533	0.764648	0.582031	0.70166	0.634277	0.56543	0.59668	0.48877	0.549805	0.403809	0.804688	0.87793	0.643066	0.244873	0.214233	0.5	0.449951	0.571289	0.959961	1	0.592773	0.856934	0.739258	0.913086	0.618652	0.295166	0.935059
ACH-000969																			1	1	1		1	1	1	1																			0.984863	0.984863		1
ACH-000970	0.94873	0.512695	0.54541	0.88623	0.875	0.59082	0.59082	0.727051	0.842285	0.804688	0.894531	0.00862122	0.192261	0.538574	0.0769043	0.153809	0.0769043	0	0.210571	0.105286	0.160034	0.210083	0.5625	0.587402	0.964355	0.869141	0.871094	0.968262	0.981445	1	0.254639	0.910645	0.978027	1	0.989258	0.421631	0.518066	0.320068	0.47998	0.973633	0.837891	0.837891	0.789551	0.973145	0.956543	0.956543	0.483887	0.5	1
ACH-000971	0.942871	0.506836	0.853516	0.903809	0.428467				0.82373	1	1	0.314209	0.0999756	0.649902	0.0999756	0.25	0.0999756	0.360107	0.90918	0.716309	0.905273	0.913086	0.986328	0.986328	1	0.922852	0.959961	0.901855	0.933105	0.97998	0.75	0.983398	1	0.888672	0.931641	0.722656	0.976074	1	1	0.928711	0.976562	0.883789	1	1	0.961426	0.980957	0.898438	0.919434	0.97998
ACH-000972	0.977051	0.5	0.0333252	0.0666504	0.243286	0.105286	0.0175476	0.107117	0.0810547	0.153809	0.0540466	0.0803223	0.0535583	0.196411	0	0.0178528	0	0.0357056	0.0212708	0.0425415	0.0425415	0.659668	0.350098	1	0.935547	0.774414	1	0.849121	0.899902	0.986328	0.899902	0.916504	0.96875	0.84375	0.941406	0.25	0.159058	0.5625	0.5625	1	1	0.222168	1	0.913086	0.435791	0.256348	0.0480652	0.346191	0.893555
ACH-000973	0.600098	0.107666	0.266602	0.350098	0.151855	0.34082	0.20459	0.302246	0.371338	0.5	0.49292	0.0476074	0.320557	0.692383	0.358887	0.539551	0.320557	0.0740967	0.372803	0.305176	0.45752	0.605469	0.540039	0.807617	0.805176	0.529297	0.822754	0.741699	0.880371	0.822754	0.5	0.644043	0.867188	0.989746	0.979492	0.193848	0.244873	0.476074	0.449951	0.856934	1	0.856934	0.758789	0.919922	0.799805	0.549805	0.269531	0.447021	0.966797
ACH-000974	1	0	0.300049	0.5		0	0	0.199951				0.416748	0.875	0.875	0.300049	0.462402	0.162476	0	0.947266	0.947266	1	0.736816	0.0952148	1	1	1	1	1		0.54541		1	1	1	0.846191	0.720703	0.744141			0	0	0	1				0	0.970215	1
ACH-000976	0.787109	0.127686	0.5	0.725098	0	0.441895	0.209351	0.162842	0.583496	0.6875	0.583496	0.085083	0.16394	0.300049	0.213135	0.295166	0.16394	0	0.0476074	0	0.174561	0.0506287	0.523926	0.571289	0.425049	0.199951	0.558594	0.722168	0.45459	0.611328	0.318115	0.962891	1	1	0.922852	0.8125	0.875	1	1	0.666504	0.666504	0.666504	0.555664	1	0.926758	0.804688	0.461426	0.23999	0.931152
ACH-000977	0.630371	0.0822144	0.287598	0.418945	0.0232544	0.0684814	0.0958862	0.111084	0.409912	0.296631	0.229492	0.192383	0.205322	0.562988	0.198853	0.309326	0.124634	0.0765991	0.515625	0.469727	0.393555	0.701172	0.840332	0.866211	0.89209	0.642578	0.871094	0.945312	0.978027	0.945801	0.741211	0.897461	0.843262	0.957031	0.885742	0.70166	0.700684	0.5	0.562012	0.205444	0.676758	0.693848	0.510254	0.611328	0.63623	0.727051	0.28125	0.558594	0.971191
ACH-000978	0.75	0.583496			0.574707	0.833496	0.583496	0.541504	0.974121	0.888672	1	0.851074	0.766602	0.966797	0.666504	0.733398	0.852051	0.941406	0.90918	0.40918	0.95459	0.915039	0.952148	0.952148	0.95459	1	0.790527	0.930176	0.918945	1	0.864746	1	0.942383	0.843262	0.941406	0.90918	0.727051			1	1	0.958496	1	1			0.788086	0.845703	0.973633
ACH-000979	0.826172	0.217407	0.474609	0.406738	0.0333252	0.536621	0.341553	0.512207	1	0.839844	1	0.426514	0	0.592773	0.333252	0.185181	0.081604	0	0.483887	0.59668	0.435547	0.646973	0.740723	0.927246	0.964844	0.771973	0.979004	1	0.9375	1	0.848633	0.879883	1	1	0.848633	0.945312	1	0.764648	0.735352	0.695801	0.814941	0.962891	0.666504	1	1	0.850098	0.757812	0.711914	0.950684
ACH-000980	0.571289	0.392822	0.277832	0.611328	0.54541	0.657227	0.542969	0.685547	0.470703	0.625	0.470703	0.731934	0.657227	0.856934	0.714355	0.799805	0.600098	0.350098	0.735352	0.793945	0.764648	0.660156	0.643066	0.768066	0.666504	0.586914	0.649902	0.825195	0.963867	0.75	0.745605	0.862305	0.973145	0.917969	0.917969	0.672363	0.655273	0.625	0.75	0.529297	0.882324	0.558594	0.5	0.666504	0.714355	0.571289	0.546387	0.725098	0.853516
ACH-000981	1	0.931152	0.461426	0.769043	0.63623				0.922852	0.777832	0.846191	0.932617	0.783691	0.973145	0.905273	0.864746	0.918945	0.222168	0.913086	0.95459	1	0.970703	1	1	0.94873	0.94873	0.897461	0.922852	0.882324	0.794922	0.764648	0.95459	1	1	1	0.899902	0.899902							0.90918	0.680176	1	0.962402	0.952148	0.976074
ACH-000982	0.853027	0.470703	0.833496	0.700195	0.652344	0.714355	0.228516	0.25708	0.894531	0.826172	0.947266	0.0789185	0	0.03125	0.030304	0.121216	0.030304	0	0	0.102539	0	0.95459	1	0.727051	0.860352	0.767578	0.837402	0.931641		1			0.964355	0.893066	0.90332	0.535645	0.785645	1	0.933105	1	1	1	0.111084	0.82373	0.899902	0.799805	0.782227	0.899902	1
ACH-000983	1	0								0.700195		1							0.00826263	0.991699	1				1	0.992188	0.987793	0.987793		1						0.993164	0.993164	1	1	1	1	0.391602	0.0140839						1
ACH-000984	1	0	0.263184	0.631348	0.287598	0.421143	0.421143	0.157837	0.136353	0.183716	0.54541	0.904785	0.711914	1	0.741211	0.932129	0.372803	0.153809	0.947266	1	0.888672	0.364746	0.893066	0.981934	1	0.915039	0.966797	0.899902	0.548828	0.966797	0.811523	0.913086	0.884766	0.884766	0.868164	0.956543	0.956543	0.333252	0.333252	0.959961	0.958496	0.959961	0.959961	0.9375	0.899902	0.899902	0.276123	0.783203	0.990234
ACH-000985	0.944336	0.444336	0.512207	0.609863	0.850098	0.5	0.5	0.856934	0.780273	0.79541	0.829102	0.222168	0.263184	0.842285	0.157837	0.421143	0.184204	0.0666504	0.114746	0.442627	0.623047	0.822754	0.661133	0.949219	0.964844	0.579102	0.932129	0.796387	0.888672	0.966309	0.644531	0.742676				0.692383	0.730957	0.40625	0.46875	0.97998	0.980469	0.862793	0.764648	0.836914	0.914062	0.742676	0.333252	0.586914	0.975586
ACH-000986	1	0.777832	0.462891	0.759277	0.885742	0.866699	0.844238	0.710938	1	0.875	0.941406	0.020401	0	0.0249939	0	0	0	0	0	0	0	0.736328	0.772949	0.943359	0.971191	0.637695	0.938965	1	0.941406	0.979492	0.976562	0.95752	0.966309	0.932129	0.991699	0.451904	0.577148	1	1	0.97998	0.980469	0.901855	0.960938	0.90332	0.939453	0.818359	0.106506	0.94873	0.962891
ACH-000987										0.63623									0	0	1						0.994629	1	0.0100021	0	0.00990295
ACH-000988									1		0.00501251														0	1			0		0		1	0.995117	0												1
ACH-000989	0.818359	0.272705	0.444336	0.555664	0.680176	0.121216	0	0.030304	0.727051	0.428467	0.696777	0.234009	0.0499878	0.157837	0.0499878	0.300049	0		0.17395	0.0434875	0.391357	0.831543	0.609863	0.731934	0.928711	0.589355	0.910645	0.76123	0.696777	0.910645	0.656738	0.899902	1	1	0.964844	0.75	0.515625	0.714355	0.142822	0.17395	0.869629	0.739258	0.782715	0.736816	0.652344	0.869629	0.535156	0.240356	0.898926
ACH-000990	1	1	0.951172	0.975586	0.98584	0.982422	0.982422	0.807129	1	0.856934	1	0.97998	0.97168	0.962402	0.895996	0.933105	0.962402	0.861328	0.969727	1	0.81543	0.973145	0.993164	1	0.958496	0.996094	0.992188	0.968262	1	1	1	1	0.991699	1	0.856934	0.947754	0.93457	1	1	0.90918	0.90918	0.90918	0.818359	0.945801			0.993164	0.993652	1
ACH-000991	1	0.729004	0.944336	0.944336	0.17395	0.941406	0.176514	0.117676		0.911621		0.074646	0	0	0	0.0416565	0	0	0.0789185	0.106689	0.41333	0.825684	0.820312	0.876465	1	0.955566	0.891113	0.799805	0.879883	0.888672	0.919922	0.978516	1	0.983887	0.888672	0.683105	0.866699	0.727051	0.727051	0.970703	1	0.853027	0.970703	0.461426	0.833496	0.527832	0.856934	0.419434	0.939941
ACH-000992	0.735352	0.735352	0.833496	0.583496	0.692383	0.799805	0.0888672	0.600098	0.888672	0.600098	0.755371	0.303467	0.0975342	0.649902	0.121948	0.292725	0.121948	0.0416565	0.558105	0.511719	0.57666	0.795898	0.744629	0.872559	0.970703	0.82373	0.808594	0.933105	0.900879	0.911133	0.881836	0.936035	0.97168	0.971191	0.871582	0.836914	0.82666	0.933105	0.600098	0.689453	0.896484	0.896484	0.928711	0.866699	0.785645	0.971191	0.878906	0.776855	0.939453
ACH-000993	1	0.0384521	1	1	0.729004	0.71875	0.28125	0.6875	0.9375	1	0.875	0.964355	0.0750122	0.983398	0.116638	0.916504	0.19165	0	0.952148	0.952148	0.976074	0.987793	1	1	0.989258	0.702148	0.985352	0.985352	1	0.984863	1	1	1	1	1	1	1	1	1	0.846191	0.384521	0.846191	0.524902	0.956543	0.365967	1	0.723633	0.971191	1
ACH-000994	0.73584	0.288574	0.0322571	0.3125	0	0	0	0	0.643066	0.5	0.666504	0.00787354	0.0434875	0.0869751	0.0217438	0.0217438	0.0217438	0.0645142	0.04599	0.0114975	0.022995	0.71875	0.818359	0.945312	0.831543	0.486084	0.966309	0.813477	0.804688	0.881348	0.634277	0.75	0.727051	0.931641	0.932617	0.5	0.871582	0.700195	0.0999756	0.340088	0.548828	0.372559	0.23999	0.244873	0.285645	0.399902	0.0546875	0.564453	0.969727
ACH-000995	0	0			1					0.428467		1	0.27832	1	0.27832	0.67627	0.995117		0.015625	0.046875	0.046875	1	0	0	0	0			0.0117645		0.988281		1	1	1					1	1	0.977051	0.0114975				1	1	1
ACH-000996	0.646973	0.588379	0	0.461426	0.485596	0	0	0	0.666504	0.473633	0.666504	0.03125	0	0	0	0	0	0.348877	0.318115	0.136353	0.61377	0.82959	0.88623	0.977051	0.90918	0.90918	0.974121	1	1	0.743652	0.789551		0.952148	0.714355	0.952148	0.25	0.54541	1	1	0	0.958496	0.75	0	1	0.285645	0.643066	0.206543	0.382324	1
ACH-000997	0.961426	0.0384521	0.130981	0.438965	0.476074	0.411865	0.646973	0.4375	0.799805	0.807617	1	0.416748	0.0200043	0.26001	0.0200043	0.0999756	0.0599976	0.0333252	0.229126	0.0416565	0.208374	0.56543	0.588379	0.941406	0.774902	0.674805	1	1	0.96875	1	0.6875	1	0.961426	0.961426	0.961426	0.666504	0.60791	0.457031	0.342773	1	1	1	1	1	0.852051	0.852051	0.425537	0.824219	0.876953
ACH-000998	0.738281	0.276855	0.867676	0.558594	0.921387	0.789551	0.631348	0.432373	0.933105	0.922852	0.933105	0	0	0	0	0	0	0	0.0105286	0.0105286	0.0105286	0.922363	0.82959	1	1	1	0.983887	0.93457	1	1	1	1	0.974121	0.974121	0.974121	0.978516	0.915039	1	1	0.850098	1	0.856934	0.714355	0.708496	0.839844	1	0.787109	0.57373	1
ACH-000999	0.964844	0.579102	0.703613	1	0.416748	0.333252	0.444336	0.692383	0.919922	0.884766	1	0.0196075	0	0	0	0	0	0.0114975	0.0227203	0.0227203	0.0227203	0.922852	0.852051	0.962891	0.80957	0.80957	0.981445	0.981445	0.922852	1	0.692383	1	1	0.90918	0.822266	1	1	1	1					0.666504	0.959961	1	0.970703	0.950684	0.989258
ACH-001016	0.0103073	0	0	0.0721436	0.0149231	0	0	0.0724487	0.0612183	0.0769043	0.0612183	0.0344849	0.0222168	0.159058	0.0888672	0.0908813	0	0	0.0824585	0.0927734	0.154663	0.329346	0.0776978	0.203857	0.191162	0.0661621	0.442627	0.646973	0.29126	0.279297	0.164551	0.19397	0.889648	0.992188	0.782715	0.0512695	0.0598145	0.0444336	0	0.266602	0.344727	0.133301	0	0.648926	0.707031	0.224121	0.148926	0.339844	0.77002
ACH-001048	0.0307617	0.0153809	0	0	0.0128174	0.083313	0.0400085	0.0800171	0	0.113647	0.0434875		0	0	0	0	0	0	0.0105286	0	0.0106354	0.264404	0	0.147095	0.176514	0	0.199951	0.456787	0.287598	0	0.0135117	0	1	1	0.964355	0.0200043	0.0200043	0.111084	0.111084					0	0.114746	0.0333252	0.00598907	0	0.507324
ACH-001063	1	0.361084	0.666504	0.666504	0.674316	0.777832	0.611328	0.833496	0.899902	0.600098	0.75	0.638672	0.627441	0.82373	0.235352	0.666504	0.176514	0.258057	0.463379	0.561035	0.829102	0.82373	0.885742	0.885742	0.882324	0.803711	0.96875	1	0.916504	0.625	0.979004	1	0.871094	0.806641	0.935547	0.959961	0.959961	1	1	0.740723	1	1	1	0.814941	1	0.90918	0.589844	0.813965	1
ACH-001075	0.571289	0.142822	0	0.117676	0.166626	0.17395	0.304443	0.478271	0.799805	0.549805	0.199951	0.476074	0	0.571289	0.357178	0.643066	0.214233	0	0.0208282	0.104187	0.125	0.354492	0.536133	0.84082	0.604492	0.406494	0.981934	0.982422	0.46875	0.982422	0.46875	0.25	1	1	1	0.238037	0	0.360107	0.360107	0.541504	0.5	0.5	0.5	1	0.5	0.0416565	0.219482	0.419189	0.82666
ACH-001078			0.0416565	0.0416565	0	0	0	0	0.0499878	0.272705	0.150024	0.350098	0.204102	0.416748	0.265381	0	0	0	0	0.56543	0	0.45166	0.288818	0.288818	1	0.875	0.0588379	0.771484	1	0.942871	0.856934	0.055542	1	1	0.646973	0.70459	0.70459								0	0	0.0963745	0.078125	0.769043
ACH-001093	0.67627	0.426514	0.557617	0.672852	0.271729	0.228027	0.175415	0.203735	0.287598	0.5625	0.631348	0.313721	0.281738	0.657227	0.323975	0.323975	0.309814	0.387207	0.664062	0.21875	0.0859375	0.51416	0.591797	0.720215	0.82666	0.363525	0.76709	0.78125	0.649902	0.57666	0.649902	0.768066	0.868164	0.847656	0.461426	0.515625	0.359375	0.54541	0.40918	0.804199	1	1	0.717285	0.641602	0	0	0.493652	0.604492	0.829102
ACH-001106	1	0.777832	1	1		1	1	1	1	1	1	1	1	1	1	0.933105	1	1	0.965332	0.714355	1	0.758789	1	1	1	1	0.964355	0.964355	1	0.714355	0.973633	1	1	0.769043	1	0.977539	0.977539	1	1	1	1	1	0.96875	1	0.5	0.205933	0.902832	1	1
ACH-001129	0.407715	0.174805	0.841309	0.92041	0.199951	0.199951	0	0.160034	0.5625	0.899902	0.375	0.769043	0.516113	0.899902	0.354736	0.741699	0.290283	0.208374	0.821777	0.597168	0.458252	0.971191	0.983887	1	0.980469	0.696289	0.919922	0.921387	0.94873	0.941406	0.871582	0.904785	0.799805	0.942871	0.856934	0.963867	0.981934	0.939453	0.96875					1	0.757812	0.848633	0.748047	0.85791	1
ACH-001130	0.5	0.0506287	0.530762	0.591797	0.837891	0.594727	0.0253143	0.269287	0.256104	0.703125	0.539551	0.315186	0.640137	0.986816	0.680176	0.626465	0.533203	0.0722656	0.536621	0.365967	0.609863	0.777832	0.671387	0.963379	0.994141	0.712402	0.849121	0.97168	0.858398	1	0.89209	0.895508	0.86377	0.98877	0.977539	0.349609	0.514648	0.989746	0.773438	0.871094	0.967773	0.967773	0.741699	0.967285	0.935547	0.989258	0.412109	0.737305	0.938477
ACH-001150			0	0	0.0150375	0	0	0	0.233276	0.176514	0.852539	0.5	0.655273	0.456055	0.844727	0.655273	0.0196075	0.424316	0	0	0	0.583984	0.176514	0.98877	0.950195	0.799805	0.868652	0.973633	0.988281	1	0.428467	0.408203	0.835449	0.810059	0.538574	0.549316	0.0985718	1	0.529297	0	0.588379	1	0	1	0	0	0.337402	0.19812	1
ACH-001151	0.260986	0	0.186035	0.197632	0	0.260986	0	0.294189	0.62207	0.509277	0.615234	0	0.375	0.375	0.03125	0.34375	0.4375	0	0	0	0.381836	0.395508	0.777832	0.784668	0.467773	0.137085	0.366699	0.875	0.379639	0.550293	0.252441	0	0.407471	1	0.68457	0	0.154297	0.272705	0.140625	0.301025	0.776855	0	0	0.916504	0.172363	0.0172424	0.230225	0.270508	0.993652
ACH-001162	0.975586	0.804688	0	0.888672	0.714355	1	1	0.0999756	1	0.5	1	0.81543	0.482666	1	1	0.965332	0.655273	0.363525	0.638672	0.833496	0.583496	0.0908813	0.769043	0.230713	1	1		0.75	1	0.75	1		1	1	0.916504	0.933105	0.933105			0.964355	0.964355	1	1	0.444336	1	0.740723	0.875	1	1
ACH-001190	0.040802	0	0	0	0.0999756	0.0400085	0.0384521	0.0400085	0.166626	0.222168	0.23999	0.03125	0	0	0	0	0	0	0	0.0166626	0	0.244873	0.646973	0.441162	0.485596	0.314209	0.600098	0.866699	0.307617	0.266602	0.0810547	0.384521	0.428467	0.785645	0.928711	0.680176	0.320068	0.818359	0.600098	0.551758	0.733398	0.571289	0.0714111	0.170776	0.833496	0.666504	0.586426	0.865723	0.312988
ACH-001239	0.114258	0	0.0196075	0.0192261	0.083313	0	0	0.125		0.170776		0.0344849	0	0.0294189	0	0	0	0.0454407	0.324219	0.0856934	0.285645	0.169067	0.185181	0.154785	0.166626	0.102539	0.0908813	0.283691	0.272705	0.351318	0.0980225	0.127686	0.605469	0.887207	0.842773	0.0476074	0.0476074	0.353027	0.125	0.125	0.130493	0.0416565	0.125	0	0.0714111	0.0487671	0.0147095	0.0392151	0.816895
ACH-001306	0.269775	0.015625	0.0800171	0.0714111	0	0	0	0.0416565		0.313721		0.104858	0	0.03125	0	0.027771	0.0270233	0	0.0655518	0.0689697	0.118652	0.0908813	0.111084	0.135132	0.268311	0.243896	0.322021	0.522461	0.39624	0.396973	0.313721	0.482666	0.897949	0.877441	0.787109	0.104492	0.179077	0.114258	0.03125	0.305664	0.361084	0.416748	0.305664	0.40625	0.228516	0.147095	0.0952148	0.0333252	0.775879
ACH-001307	0.0116272	0	0.0144958	0	0.0484009	0.0454407	0	0	0	0.376465	0.136353	0.31543	0.147095	0.32251	0.0882568	0.03125	0.242432	0.0999756	0.25	0.258057	0.40332	0.103882	0.0274048	0.277832	0.348389	0.188843	0.185669	0.278564	0.411865	0.274902	0.484375	0.210571	0.60791	0.960938	0.980469	0.112915	0.365234	0.342041	0.411865	0	0.142822	0.136353	0.150024	0.181763	0.333252	0.199951	0.342529	0.0409241	0.918457
ACH-001318	0.0882568	0.0784302	0.139526	0.207275	0.302734	0.0652466	0.152222	0.260986	0.22583	0.300049	0.399902	0.218994	0.107666	0.453125	0.1875	0.369141	0.258057	0.138916	0.230713	0.269287	0.339844	0.509277	0.469971	0.597656	0.717773	0.364746	0.67627	0.696289	0.791992	0.666504	0.65332	0.720703	0.874023	0.943848	0.887207	0.452393	0.535645	0.612793	0.266602	0.25	0.338135	0.367676	0.313477	0.452393	0.349121	0.390625	0.407715	0.438721	0.661621
ACH-001321	0.904785	0.142822	0.90918	0.90918	1				0.888672	0.894531	1	0.981934	0.833496	0.916504	0.916504	0.875	0.695801	0.973633	0.5	0.5	0.978027	1	0.611328	1	1	0.931152	1	0.984863	1	0.984863	0.850098	0.933105	0.852051	1	0.871094	1	1								1	1	0.876953	0.729004	0.984863
[truncated: 361 more columns]

## Sheet: TERT_CpG_ASM_info
Supplementary Table S5b: TERT CpG pair information
Regions and locations for TERT locus CpG pairs used in ASM estimates
	Chromosome	Position	5kb_prior	Exon_1	Remaining_gene_body	5kb_post
chr5_1298671-	chr5	1298671	TRUE	FALSE	FALSE	FALSE
chr5_1298644-	chr5	1298644	TRUE	FALSE	FALSE	FALSE
chr5_1298572+	chr5	1298572	TRUE	FALSE	FALSE	FALSE
chr5_1298568+	chr5	1298568	TRUE	FALSE	FALSE	FALSE
chr5_1298265-	chr5	1298265	TRUE	FALSE	FALSE	FALSE
chr5_1298258-	chr5	1298258	TRUE	FALSE	FALSE	FALSE
chr5_1298239-	chr5	1298239	TRUE	FALSE	FALSE	FALSE
chr5_1298237-	chr5	1298237	TRUE	FALSE	FALSE	FALSE
chr5_1298109+	chr5	1298109	TRUE	FALSE	FALSE	FALSE
chr5_1297953-	chr5	1297953	TRUE	FALSE	FALSE	FALSE
chr5_1297901+	chr5	1297901	TRUE	FALSE	FALSE	FALSE
chr5_1296376-	chr5	1296376	TRUE	FALSE	FALSE	FALSE
chr5_1296259+	chr5	1296259	TRUE	FALSE	FALSE	FALSE
chr5_1296231+	chr5	1296231	TRUE	FALSE	FALSE	FALSE
chr5_1296186-	chr5	1296186	TRUE	FALSE	FALSE	FALSE
chr5_1296006+	chr5	1296006	FALSE	FALSE	FALSE	FALSE
chr5_1295904-	chr5	1295904	FALSE	FALSE	FALSE	FALSE
chr5_1295798+	chr5	1295798	FALSE	FALSE	FALSE	FALSE
chr5_1295796+	chr5	1295796	FALSE	FALSE	FALSE	FALSE
chr5_1295771-	chr5	1295771	FALSE	FALSE	FALSE	FALSE
chr5_1295770+	chr5	1295770	FALSE	FALSE	FALSE	FALSE
chr5_1295761-	chr5	1295761	FALSE	FALSE	FALSE	FALSE
chr5_1295759-	chr5	1295759	FALSE	FALSE	FALSE	FALSE
chr5_1295753-	chr5	1295753	FALSE	FALSE	FALSE	FALSE
chr5_1295706+	chr5	1295706	FALSE	FALSE	FALSE	FALSE
chr5_1295704+	chr5	1295704	FALSE	FALSE	FALSE	FALSE
chr5_1295698+	chr5	1295698	FALSE	FALSE	FALSE	FALSE
chr5_1295684+	chr5	1295684	FALSE	FALSE	FALSE	FALSE
chr5_1295680+	chr5	1295680	FALSE	FALSE	FALSE	FALSE
chr5_1295618-	chr5	1295618	FALSE	FALSE	FALSE	FALSE
chr5_1295605-	chr5	1295605	FALSE	FALSE	FALSE	FALSE
chr5_1295593-	chr5	1295593	FALSE	FALSE	FALSE	FALSE
chr5_1295590-	chr5	1295590	FALSE	FALSE	FALSE	FALSE
chr5_1295457+	chr5	1295457	FALSE	FALSE	FALSE	FALSE
chr5_1295453+	chr5	1295453	FALSE	FALSE	FALSE	FALSE
chr5_1295445+	chr5	1295445	FALSE	FALSE	FALSE	FALSE
chr5_1295443+	chr5	1295443	FALSE	FALSE	FALSE	FALSE
chr5_1295430+	chr5	1295430	FALSE	FALSE	FALSE	FALSE
chr5_1295393-	chr5	1295393	FALSE	FALSE	FALSE	FALSE
chr5_1295376-	chr5	1295376	FALSE	FALSE	FALSE	FALSE
chr5_1295374-	chr5	1295374	FALSE	FALSE	FALSE	FALSE
chr5_1295342+	chr5	1295342	FALSE	FALSE	FALSE	FALSE
chr5_1295337+	chr5	1295337	FALSE	FALSE	FALSE	FALSE
chr5_1295321-	chr5	1295321	FALSE	FALSE	FALSE	FALSE
chr5_1295320+	chr5	1295320	FALSE	FALSE	FALSE	FALSE
chr5_1295313-	chr5	1295313	FALSE	FALSE	FALSE	FALSE
chr5_1295273+	chr5	1295273	FALSE	FALSE	FALSE	FALSE
chr5_1295266+	chr5	1295266	FALSE	FALSE	FALSE	FALSE
chr5_1295261+	chr5	1295261	FALSE	FALSE	FALSE	FALSE
chr5_1295256+	chr5	1295256	FALSE	FALSE	FALSE	FALSE
chr5_1295246+	chr5	1295246	FALSE	FALSE	FALSE	FALSE
chr5_1295224-	chr5	1295224	FALSE	FALSE	FALSE	FALSE
chr5_1295138+	chr5	1295138	FALSE	TRUE	FALSE	FALSE
chr5_1295134+	chr5	1295134	FALSE	TRUE	FALSE	FALSE
chr5_1295117-	chr5	1295117	FALSE	TRUE	FALSE	FALSE
chr5_1295116+	chr5	1295116	FALSE	TRUE	FALSE	FALSE
chr5_1295107-	chr5	1295107	FALSE	TRUE	FALSE	FALSE
chr5_1295105-	chr5	1295105	FALSE	TRUE	FALSE	FALSE
chr5_1295099-	chr5	1295099	FALSE	TRUE	FALSE	FALSE
chr5_1295097-	chr5	1295097	FALSE	TRUE	FALSE	FALSE
chr5_1295095-	chr5	1295095	FALSE	TRUE	FALSE	FALSE
chr5_1294994+	chr5	1294994	FALSE	TRUE	FALSE	FALSE
chr5_1294982+	chr5	1294982	FALSE	TRUE	FALSE	FALSE
chr5_1294980+	chr5	1294980	FALSE	TRUE	FALSE	FALSE
chr5_1294973-	chr5	1294973	FALSE	TRUE	FALSE	FALSE
chr5_1294972+	chr5	1294972	FALSE	TRUE	FALSE	FALSE
chr5_1294970-	chr5	1294970	FALSE	TRUE	FALSE	FALSE
chr5_1294962-	chr5	1294962	FALSE	TRUE	FALSE	FALSE
chr5_1294960-	chr5	1294960	FALSE	TRUE	FALSE	FALSE
chr5_1294958-	chr5	1294958	FALSE	TRUE	FALSE	FALSE
chr5_1294889+	chr5	1294889	FALSE	TRUE	FALSE	FALSE
chr5_1294872+	chr5	1294872	FALSE	FALSE	TRUE	FALSE
chr5_1294447-	chr5	1294447	FALSE	FALSE	TRUE	FALSE
chr5_1294440-	chr5	1294440	FALSE	FALSE	TRUE	FALSE
chr5_1294433-	chr5	1294433	FALSE	FALSE	TRUE	FALSE
chr5_1294420-	chr5	1294420	FALSE	FALSE	TRUE	FALSE
chr5_1294381+	chr5	1294381	FALSE	FALSE	TRUE	FALSE
chr5_1294369+	chr5	1294369	FALSE	FALSE	TRUE	FALSE
chr5_1294344-	chr5	1294344	FALSE	FALSE	TRUE	FALSE
chr5_1294338-	chr5	1294338	FALSE	FALSE	TRUE	FALSE
chr5_1294330-	chr5	1294330	FALSE	FALSE	TRUE	FALSE
chr5_1294328-	chr5	1294328	FALSE	FALSE	TRUE	FALSE
chr5_1294281+	chr5	1294281	FALSE	FALSE	TRUE	FALSE
chr5_1294276+	chr5	1294276	FALSE	FALSE	TRUE	FALSE
chr5_1294262+	chr5	1294262	FALSE	FALSE	TRUE	FALSE
chr5_1294056+	chr5	1294056	FALSE	FALSE	TRUE	FALSE
chr5_1294043+	chr5	1294043	FALSE	FALSE	TRUE	FALSE
chr5_1294031+	chr5	1294031	FALSE	FALSE	TRUE	FALSE
chr5_1293718-	chr5	1293718	FALSE	FALSE	TRUE	FALSE
chr5_1293693-	chr5	1293693	FALSE	FALSE	TRUE	FALSE
chr5_1293613+	chr5	1293613	FALSE	FALSE	TRUE	FALSE
chr5_1293607+	chr5	1293607	FALSE	FALSE	TRUE	FALSE
chr5_1293603+	chr5	1293603	FALSE	FALSE	TRUE	FALSE
chr5_1293591+	chr5	1293591	FALSE	FALSE	TRUE	FALSE
chr5_1293588+	chr5	1293588	FALSE	FALSE	TRUE	FALSE
chr5_1291627-	chr5	1291627	FALSE	FALSE	TRUE	FALSE
chr5_1291593+	chr5	1291593	FALSE	FALSE	TRUE	FALSE
chr5_1291590+	chr5	1291590	FALSE	FALSE	TRUE	FALSE
chr5_1291584+	chr5	1291584	FALSE	FALSE	TRUE	FALSE
chr5_1291383+	chr5	1291383	FALSE	FALSE	TRUE	FALSE
chr5_1291375-	chr5	1291375	FALSE	FALSE	TRUE	FALSE
chr5_1291374+	chr5	1291374	FALSE	FALSE	TRUE	FALSE
chr5_1291249+	chr5	1291249	FALSE	FALSE	TRUE	FALSE
chr5_1291108+	chr5	1291108	FALSE	FALSE	TRUE	FALSE
chr5_1291090+	chr5	1291090	FALSE	FALSE	TRUE	FALSE
chr5_1291087+	chr5	1291087	FALSE	FALSE	TRUE	FALSE
chr5_1291081+	chr5	1291081	FALSE	FALSE	TRUE	FALSE
chr5_1290562+	chr5	1290562	FALSE	FALSE	TRUE	FALSE
chr5_1290544+	chr5	1290544	FALSE	FALSE	TRUE	FALSE
chr5_1290541+	chr5	1290541	FALSE	FALSE	TRUE	FALSE
chr5_1290535+	chr5	1290535	FALSE	FALSE	TRUE	FALSE
chr5_1290520+	chr5	1290520	FALSE	FALSE	TRUE	FALSE
chr5_1290502+	chr5	1290502	FALSE	FALSE	TRUE	FALSE
chr5_1290499+	chr5	1290499	FALSE	FALSE	TRUE	FALSE
chr5_1290493+	chr5	1290493	FALSE	FALSE	TRUE	FALSE
chr5_1290352+	chr5	1290352	FALSE	FALSE	TRUE	FALSE
chr5_1290334+	chr5	1290334	FALSE	FALSE	TRUE	FALSE
chr5_1290332+	chr5	1290332	FALSE	FALSE	TRUE	FALSE
chr5_1290325+	chr5	1290325	FALSE	FALSE	TRUE	FALSE
chr5_1289848+	chr5	1289848	FALSE	FALSE	TRUE	FALSE
chr5_1289830+	chr5	1289830	FALSE	FALSE	TRUE	FALSE
chr5_1289827+	chr5	1289827	FALSE	FALSE	TRUE	FALSE
chr5_1289821+	chr5	1289821	FALSE	FALSE	TRUE	FALSE
chr5_1289764+	chr5	1289764	FALSE	FALSE	TRUE	FALSE
chr5_1289746+	chr5	1289746	FALSE	FALSE	TRUE	FALSE
chr5_1289743+	chr5	1289743	FALSE	FALSE	TRUE	FALSE
chr5_1289737+	chr5	1289737	FALSE	FALSE	TRUE	FALSE
chr5_1289722+	chr5	1289722	FALSE	FALSE	TRUE	FALSE
chr5_1289704+	chr5	1289704	FALSE	FALSE	TRUE	FALSE
chr5_1289701+	chr5	1289701	FALSE	FALSE	TRUE	FALSE
chr5_1289695+	chr5	1289695	FALSE	FALSE	TRUE	FALSE
chr5_1289368+	chr5	1289368	FALSE	FALSE	TRUE	FALSE
chr5_1289359+	chr5	1289359	FALSE	FALSE	TRUE	FALSE
chr5_1289276-	chr5	1289276	FALSE	FALSE	TRUE	FALSE
chr5_1289123+	chr5	1289123	FALSE	FALSE	TRUE	FALSE
chr5_1289120+	chr5	1289120	FALSE	FALSE	TRUE	FALSE
chr5_1285384-	chr5	1285384	FALSE	FALSE	TRUE	FALSE
chr5_1285373-	chr5	1285373	FALSE	FALSE	TRUE	FALSE
chr5_1285358-	chr5	1285358	FALSE	FALSE	TRUE	FALSE
chr5_1285285+	chr5	1285285	FALSE	FALSE	TRUE	FALSE
chr5_1285262+	chr5	1285262	FALSE	FALSE	TRUE	FALSE
chr5_1285248-	chr5	1285248	FALSE	FALSE	TRUE	FALSE
chr5_1285237-	chr5	1285237	FALSE	FALSE	TRUE	FALSE
chr5_1285164+	chr5	1285164	FALSE	FALSE	TRUE	FALSE
chr5_1285141+	chr5	1285141	FALSE	FALSE	TRUE	FALSE
chr5_1285127-	chr5	1285127	FALSE	FALSE	TRUE	FALSE
chr5_1285116-	chr5	1285116	FALSE	FALSE	TRUE	FALSE
chr5_1284949-	chr5	1284949	FALSE	FALSE	TRUE	FALSE
chr5_1284887+	chr5	1284887	FALSE	FALSE	TRUE	FALSE
chr5_1284873-	chr5	1284873	FALSE	FALSE	TRUE	FALSE
chr5_1284801-	chr5	1284801	FALSE	FALSE	TRUE	FALSE
chr5_1284691-	chr5	1284691	FALSE	FALSE	TRUE	FALSE
chr5_1284680-	chr5	1284680	FALSE	FALSE	TRUE	FALSE
chr5_1284668-	chr5	1284668	FALSE	FALSE	TRUE	FALSE
chr5_1284607+	chr5	1284607	FALSE	FALSE	TRUE	FALSE
chr5_1284584+	chr5	1284584	FALSE	FALSE	TRUE	FALSE
chr5_1284570-	chr5	1284570	FALSE	FALSE	TRUE	FALSE
chr5_1284559-	chr5	1284559	FALSE	FALSE	TRUE	FALSE
chr5_1284530+	chr5	1284530	FALSE	FALSE	TRUE	FALSE
chr5_1284523+	chr5	1284523	FALSE	FALSE	TRUE	FALSE
chr5_1284486+	chr5	1284486	FALSE	FALSE	TRUE	FALSE
chr5_1284463+	chr5	1284463	FALSE	FALSE	TRUE	FALSE
chr5_1284449-	chr5	1284449	FALSE	FALSE	TRUE	FALSE
chr5_1284438-	chr5	1284438	FALSE	FALSE	TRUE	FALSE
chr5_1284365+	chr5	1284365	FALSE	FALSE	TRUE	FALSE
chr5_1284342+	chr5	1284342	FALSE	FALSE	TRUE	FALSE
chr5_1284328-	chr5	1284328	FALSE	FALSE	TRUE	FALSE
chr5_1284317-	chr5	1284317	FALSE	FALSE	TRUE	FALSE
chr5_1284244+	chr5	1284244	FALSE	FALSE	TRUE	FALSE
chr5_1284221+	chr5	1284221	FALSE	FALSE	TRUE	FALSE
chr5_1284207-	chr5	1284207	FALSE	FALSE	TRUE	FALSE
chr5_1284146-	chr5	1284146	FALSE	FALSE	TRUE	FALSE
chr5_1284135-	chr5	1284135	FALSE	FALSE	TRUE	FALSE
chr5_1284100-	chr5	1284100	FALSE	FALSE	TRUE	FALSE
chr5_1284061+	chr5	1284061	FALSE	FALSE	TRUE	FALSE
chr5_1284038+	chr5	1284038	FALSE	FALSE	TRUE	FALSE
chr5_1284024-	chr5	1284024	FALSE	FALSE	TRUE	FALSE
chr5_1284013-	chr5	1284013	FALSE	FALSE	TRUE	FALSE
chr5_1284002-	chr5	1284002	FALSE	FALSE	TRUE	FALSE
chr5_1283971-	chr5	1283971	FALSE	FALSE	TRUE	FALSE
chr5_1283945-	chr5	1283945	FALSE	FALSE	TRUE	FALSE
chr5_1283916+	chr5	1283916	FALSE	FALSE	TRUE	FALSE
chr5_1283911-	chr5	1283911	FALSE	FALSE	TRUE	FALSE
chr5_1283910+	chr5	1283910	FALSE	FALSE	TRUE	FALSE
chr5_1283885-	chr5	1283885	FALSE	FALSE	TRUE	FALSE
chr5_1283790+	chr5	1283790	FALSE	FALSE	TRUE	FALSE
chr5_1283736+	chr5	1283736	FALSE	FALSE	TRUE	FALSE
chr5_1283553+	chr5	1283553	FALSE	FALSE	TRUE	FALSE
chr5_1283532-	chr5	1283532	FALSE	FALSE	TRUE	FALSE
chr5_1283521-	chr5	1283521	FALSE	FALSE	TRUE	FALSE
chr5_1283425-	chr5	1283425	FALSE	FALSE	TRUE	FALSE
chr5_1283407-	chr5	1283407	FALSE	FALSE	TRUE	FALSE
chr5_1283399-	chr5	1283399	FALSE	FALSE	TRUE	FALSE
chr5_1283370+	chr5	1283370	FALSE	FALSE	TRUE	FALSE
chr5_1283364+	chr5	1283364	FALSE	FALSE	TRUE	FALSE
chr5_1283349+	chr5	1283349	FALSE	FALSE	TRUE	FALSE
chr5_1283304-	chr5	1283304	FALSE	FALSE	TRUE	FALSE
chr5_1283278-	chr5	1283278	FALSE	FALSE	TRUE	FALSE
chr5_1283182-	chr5	1283182	FALSE	FALSE	TRUE	FALSE
chr5_1283164-	chr5	1283164	FALSE	FALSE	TRUE	FALSE
chr5_1283156-	chr5	1283156	FALSE	FALSE	TRUE	FALSE
chr5_1283120+	chr5	1283120	FALSE	FALSE	TRUE	FALSE
chr5_1283105+	chr5	1283105	FALSE	FALSE	TRUE	FALSE
chr5_1283045-	chr5	1283045	FALSE	FALSE	TRUE	FALSE
chr5_1283034-	chr5	1283034	FALSE	FALSE	TRUE	FALSE
chr5_1283022-	chr5	1283022	FALSE	FALSE	TRUE	FALSE
chr5_1282984-	chr5	1282984	FALSE	FALSE	TRUE	FALSE
chr5_1282973-	chr5	1282973	FALSE	FALSE	TRUE	FALSE
chr5_1282962-	chr5	1282962	FALSE	FALSE	TRUE	FALSE
chr5_1282876+	chr5	1282876	FALSE	FALSE	TRUE	FALSE
chr5_1282871-	chr5	1282871	FALSE	FALSE	TRUE	FALSE
chr5_1282870+	chr5	1282870	FALSE	FALSE	TRUE	FALSE
chr5_1282845-	chr5	1282845	FALSE	FALSE	TRUE	FALSE
chr5_1282817+	chr5	1282817	FALSE	FALSE	TRUE	FALSE
chr5_1282810+	chr5	1282810	FALSE	FALSE	TRUE	FALSE
chr5_1282796-	chr5	1282796	FALSE	FALSE	TRUE	FALSE
chr5_1282774-	chr5	1282774	FALSE	FALSE	TRUE	FALSE
chr5_1282745+	chr5	1282745	FALSE	FALSE	TRUE	FALSE
chr5_1282723-	chr5	1282723	FALSE	FALSE	TRUE	FALSE
chr5_1282722+	chr5	1282722	FALSE	FALSE	TRUE	FALSE
chr5_1282719-	chr5	1282719	FALSE	FALSE	TRUE	FALSE
chr5_1282709-	chr5	1282709	FALSE	FALSE	TRUE	FALSE
chr5_1282703-	chr5	1282703	FALSE	FALSE	TRUE	FALSE
chr5_1282583-	chr5	1282583	FALSE	FALSE	TRUE	FALSE
chr5_1282582+	chr5	1282582	FALSE	FALSE	TRUE	FALSE
chr5_1282509+	chr5	1282509	FALSE	FALSE	TRUE	FALSE
chr5_1282488+	chr5	1282488	FALSE	FALSE	TRUE	FALSE
chr5_1281248-	chr5	1281248	FALSE	FALSE	TRUE	FALSE
chr5_1281231-	chr5	1281231	FALSE	FALSE	TRUE	FALSE
chr5_1281113+	chr5	1281113	FALSE	FALSE	TRUE	FALSE
chr5_1281106+	chr5	1281106	FALSE	FALSE	TRUE	FALSE
chr5_1281088+	chr5	1281088	FALSE	FALSE	TRUE	FALSE
chr5_1280692-	chr5	1280692	FALSE	FALSE	TRUE	FALSE
chr5_1280683-	chr5	1280683	FALSE	FALSE	TRUE	FALSE
chr5_1280596+	chr5	1280596	FALSE	FALSE	TRUE	FALSE
chr5_1280588+	chr5	1280588	FALSE	FALSE	TRUE	FALSE
chr5_1280189-	chr5	1280189	FALSE	FALSE	TRUE	FALSE
chr5_1280175-	chr5	1280175	FALSE	FALSE	TRUE	FALSE
chr5_1280131+	chr5	1280131	FALSE	FALSE	TRUE	FALSE
chr5_1280115+	chr5	1280115	FALSE	FALSE	TRUE	FALSE
chr5_1280108-	chr5	1280108	FALSE	FALSE	TRUE	FALSE
chr5_1280107+	chr5	1280107	FALSE	FALSE	TRUE	FALSE
chr5_1280088-	chr5	1280088	FALSE	FALSE	TRUE	FALSE
chr5_1280027-	chr5	1280027	FALSE	FALSE	TRUE	FALSE
chr5_1280026+	chr5	1280026	FALSE	FALSE	TRUE	FALSE
chr5_1280004-	chr5	1280004	FALSE	FALSE	TRUE	FALSE
chr5_1279999-	chr5	1279999	FALSE	FALSE	TRUE	FALSE
chr5_1279958+	chr5	1279958	FALSE	FALSE	TRUE	FALSE
chr5_1279954+	chr5	1279954	FALSE	FALSE	TRUE	FALSE
chr5_1279948+	chr5	1279948	FALSE	FALSE	TRUE	FALSE
chr5_1279942+	chr5	1279942	FALSE	FALSE	TRUE	FALSE
chr5_1279935+	chr5	1279935	FALSE	FALSE	TRUE	FALSE
chr5_1279904-	chr5	1279904	FALSE	FALSE	TRUE	FALSE
chr5_1279701-	chr5	1279701	FALSE	FALSE	TRUE	FALSE
chr5_1279626-	chr5	1279626	FALSE	FALSE	TRUE	FALSE
chr5_1279625+	chr5	1279625	FALSE	FALSE	TRUE	FALSE
chr5_1279533+	chr5	1279533	FALSE	FALSE	TRUE	FALSE
chr5_1279529+	chr5	1279529	FALSE	FALSE	TRUE	FALSE
chr5_1279525+	chr5	1279525	FALSE	FALSE	TRUE	FALSE
chr5_1279523+	chr5	1279523	FALSE	FALSE	TRUE	FALSE
chr5_1279520+	chr5	1279520	FALSE	FALSE	TRUE	FALSE
chr5_1279516-	chr5	1279516	FALSE	FALSE	TRUE	FALSE
chr5_1279515+	chr5	1279515	FALSE	FALSE	TRUE	FALSE
chr5_1279504-	chr5	1279504	FALSE	FALSE	TRUE	FALSE
chr5_1279396-	chr5	1279396	FALSE	FALSE	TRUE	FALSE
chr5_1279395+	chr5	1279395	FALSE	FALSE	TRUE	FALSE
chr5_1279386-	chr5	1279386	FALSE	FALSE	TRUE	FALSE
chr5_1279215+	chr5	1279215	FALSE	FALSE	TRUE	FALSE
chr5_1279195-	chr5	1279195	FALSE	FALSE	TRUE	FALSE
chr5_1279194+	chr5	1279194	FALSE	FALSE	TRUE	FALSE
chr5_1279136+	chr5	1279136	FALSE	FALSE	TRUE	FALSE
chr5_1279131+	chr5	1279131	FALSE	FALSE	TRUE	FALSE
chr5_1279112+	chr5	1279112	FALSE	FALSE	TRUE	FALSE
chr5_1278088-	chr5	1278088	FALSE	FALSE	TRUE	FALSE
chr5_1278072-	chr5	1278072	FALSE	FALSE	TRUE	FALSE
chr5_1277992+	chr5	1277992	FALSE	FALSE	TRUE	FALSE
chr5_1277983-	chr5	1277983	FALSE	FALSE	TRUE	FALSE
chr5_1277982+	chr5	1277982	FALSE	FALSE	TRUE	FALSE
chr5_1277781+	chr5	1277781	FALSE	FALSE	TRUE	FALSE
chr5_1277772+	chr5	1277772	FALSE	FALSE	TRUE	FALSE
chr5_1277759-	chr5	1277759	FALSE	FALSE	TRUE	FALSE
chr5_1277758+	chr5	1277758	FALSE	FALSE	TRUE	FALSE
chr5_1277664+	chr5	1277664	FALSE	FALSE	TRUE	FALSE
chr5_1277641+	chr5	1277641	FALSE	FALSE	TRUE	FALSE
chr5_1277206+	chr5	1277206	FALSE	FALSE	TRUE	FALSE
chr5_1277197+	chr5	1277197	FALSE	FALSE	TRUE	FALSE
chr5_1277192+	chr5	1277192	FALSE	FALSE	TRUE	FALSE
chr5_1275211-	chr5	1275211	FALSE	FALSE	TRUE	FALSE
chr5_1275207-	chr5	1275207	FALSE	FALSE	TRUE	FALSE
chr5_1275200-	chr5	1275200	FALSE	FALSE	TRUE	FALSE
chr5_1275184-	chr5	1275184	FALSE	FALSE	TRUE	FALSE
chr5_1275067+	chr5	1275067	FALSE	FALSE	TRUE	FALSE
chr5_1275053-	chr5	1275053	FALSE	FALSE	TRUE	FALSE
chr5_1275052+	chr5	1275052	FALSE	FALSE	TRUE	FALSE
chr5_1275040-	chr5	1275040	FALSE	FALSE	TRUE	FALSE
chr5_1274969-	chr5	1274969	FALSE	FALSE	TRUE	FALSE
chr5_1274968+	chr5	1274968	FALSE	FALSE	TRUE	FALSE
chr5_1274947-	chr5	1274947	FALSE	FALSE	TRUE	FALSE
chr5_1274872+	chr5	1274872	FALSE	FALSE	TRUE	FALSE
chr5_1274846+	chr5	1274846	FALSE	FALSE	TRUE	FALSE
chr5_1274084-	chr5	1274084	FALSE	FALSE	TRUE	FALSE
chr5_1274072-	chr5	1274072	FALSE	FALSE	TRUE	FALSE
chr5_1274070-	chr5	1274070	FALSE	FALSE	TRUE	FALSE
chr5_1273989+	chr5	1273989	FALSE	FALSE	TRUE	FALSE
chr5_1272556-	chr5	1272556	FALSE	FALSE	TRUE	FALSE
chr5_1272549-	chr5	1272549	FALSE	FALSE	TRUE	FALSE
chr5_1272466+	chr5	1272466	FALSE	FALSE	TRUE	FALSE
chr5_1272439+	chr5	1272439	FALSE	FALSE	TRUE	FALSE
chr5_1272400-	chr5	1272400	FALSE	FALSE	TRUE	FALSE
chr5_1272219+	chr5	1272219	FALSE	FALSE	TRUE	FALSE
chr5_1271585-	chr5	1271585	FALSE	FALSE	TRUE	FALSE
chr5_1271578-	chr5	1271578	FALSE	FALSE	TRUE	FALSE
chr5_1271474+	chr5	1271474	FALSE	FALSE	TRUE	FALSE
chr5_1271470-	chr5	1271470	FALSE	FALSE	TRUE	FALSE
chr5_1271469+	chr5	1271469	FALSE	FALSE	TRUE	FALSE
chr5_1271459-	chr5	1271459	FALSE	FALSE	TRUE	FALSE
chr5_1271381+	chr5	1271381	FALSE	FALSE	TRUE	FALSE
chr5_1271355-	chr5	1271355	FALSE	FALSE	TRUE	FALSE
chr5_1271354+	chr5	1271354	FALSE	FALSE	TRUE	FALSE
chr5_1271333-	chr5	1271333	FALSE	FALSE	TRUE	FALSE
chr5_1271130+	chr5	1271130	FALSE	FALSE	TRUE	FALSE
chr5_1271034-	chr5	1271034	FALSE	FALSE	TRUE	FALSE
chr5_1271029-	chr5	1271029	FALSE	FALSE	TRUE	FALSE
chr5_1271013-	chr5	1271013	FALSE	FALSE	TRUE	FALSE
chr5_1270882+	chr5	1270882	FALSE	FALSE	TRUE	FALSE
chr5_1270871+	chr5	1270871	FALSE	FALSE	TRUE	FALSE
chr5_1270562+	chr5	1270562	FALSE	FALSE	TRUE	FALSE
chr5_1269844-	chr5	1269844	FALSE	FALSE	TRUE	FALSE
chr5_1269825-	chr5	1269825	FALSE	FALSE	TRUE	FALSE
chr5_1269656+	chr5	1269656	FALSE	FALSE	TRUE	FALSE
chr5_1269650-	chr5	1269650	FALSE	FALSE	TRUE	FALSE
chr5_1269649+	chr5	1269649	FALSE	FALSE	TRUE	FALSE
chr5_1269449+	chr5	1269449	FALSE	FALSE	TRUE	FALSE
chr5_1269066-	chr5	1269066	FALSE	FALSE	TRUE	FALSE
chr5_1268869+	chr5	1268869	FALSE	FALSE	TRUE	FALSE
chr5_1265712-	chr5	1265712	FALSE	FALSE	TRUE	FALSE
chr5_1265518-	chr5	1265518	FALSE	FALSE	TRUE	FALSE
chr5_1265517+	chr5	1265517	FALSE	FALSE	TRUE	FALSE
chr5_1265490-	chr5	1265490	FALSE	FALSE	TRUE	FALSE
chr5_1265381+	chr5	1265381	FALSE	FALSE	TRUE	FALSE
chr5_1265377+	chr5	1265377	FALSE	FALSE	TRUE	FALSE
chr5_1265053-	chr5	1265053	FALSE	FALSE	TRUE	FALSE
chr5_1265031-	chr5	1265031	FALSE	FALSE	TRUE	FALSE
chr5_1264941+	chr5	1264941	FALSE	FALSE	TRUE	FALSE
chr5_1264483-	chr5	1264483	FALSE	FALSE	TRUE	FALSE
chr5_1264456-	chr5	1264456	FALSE	FALSE	TRUE	FALSE
chr5_1261926-	chr5	1261926	FALSE	FALSE	TRUE	FALSE
chr5_1261908-	chr5	1261908	FALSE	FALSE	TRUE	FALSE
chr5_1261865+	chr5	1261865	FALSE	FALSE	TRUE	FALSE
chr5_1258644-	chr5	1258644	FALSE	FALSE	TRUE	FALSE
chr5_1258504-	chr5	1258504	FALSE	FALSE	TRUE	FALSE
chr5_1258503+	chr5	1258503	FALSE	FALSE	TRUE	FALSE
chr5_1258342-	chr5	1258342	FALSE	FALSE	TRUE	FALSE
chr5_1258289+	chr5	1258289	FALSE	FALSE	TRUE	FALSE
chr5_1258274+	chr5	1258274	FALSE	FALSE	TRUE	FALSE
chr5_1258237-	chr5	1258237	FALSE	FALSE	TRUE	FALSE
chr5_1258040+	chr5	1258040	FALSE	FALSE	TRUE	FALSE
chr5_1258025+	chr5	1258025	FALSE	FALSE	TRUE	FALSE
chr5_1257672-	chr5	1257672	FALSE	FALSE	TRUE	FALSE
chr5_1257662-	chr5	1257662	FALSE	FALSE	TRUE	FALSE
chr5_1257586+	chr5	1257586	FALSE	FALSE	TRUE	FALSE
chr5_1257562+	chr5	1257562	FALSE	FALSE	TRUE	FALSE
chr5_1256870-	chr5	1256870	FALSE	FALSE	TRUE	FALSE
chr5_1256759+	chr5	1256759	FALSE	FALSE	TRUE	FALSE
chr5_1255615+	chr5	1255615	FALSE	FALSE	TRUE	FALSE
chr5_1255602+	chr5	1255602	FALSE	FALSE	TRUE	FALSE
chr5_1254682-	chr5	1254682	FALSE	FALSE	TRUE	FALSE
chr5_1254612+	chr5	1254612	FALSE	FALSE	TRUE	FALSE
chr5_1254596+	chr5	1254596	FALSE	FALSE	TRUE	FALSE
chr5_1254593+	chr5	1254593	FALSE	FALSE	TRUE	FALSE
chr5_1254590+	chr5	1254590	FALSE	FALSE	TRUE	FALSE
chr5_1254380+	chr5	1254380	FALSE	FALSE	TRUE	FALSE
chr5_1254374+	chr5	1254374	FALSE	FALSE	TRUE	FALSE
chr5_1254026-	chr5	1254026	FALSE	FALSE	TRUE	FALSE
chr5_1254014-	chr5	1254014	FALSE	FALSE	TRUE	FALSE
chr5_1253938+	chr5	1253938	FALSE	FALSE	TRUE	FALSE
chr5_1253927+	chr5	1253927	FALSE	FALSE	TRUE	FALSE
chr5_1253917+	chr5	1253917	FALSE	FALSE	TRUE	FALSE
chr5_1253879-	chr5	1253879	FALSE	FALSE	TRUE	FALSE
chr5_1253790+	chr5	1253790	FALSE	FALSE	TRUE	FALSE
chr5_1253788-	chr5	1253788	FALSE	FALSE	TRUE	FALSE
chr5_1253787+	chr5	1253787	FALSE	FALSE	TRUE	FALSE
chr5_1253779-	chr5	1253779	FALSE	FALSE	TRUE	FALSE
chr5_1253760-	chr5	1253760	FALSE	FALSE	TRUE	FALSE
chr5_1253703+	chr5	1253703	FALSE	FALSE	TRUE	FALSE
chr5_1253688+	chr5	1253688	FALSE	FALSE	TRUE	FALSE
chr5_1253670-	chr5	1253670	FALSE	FALSE	TRUE	FALSE
chr5_1253655-	chr5	1253655	FALSE	FALSE	TRUE	FALSE
chr5_1253548+	chr5	1253548	FALSE	FALSE	TRUE	FALSE
chr5_1252127-	chr5	1252127	FALSE	FALSE	FALSE	TRUE
chr5_1252123-	chr5	1252123	FALSE	FALSE	FALSE	TRUE
chr5_1252111-	chr5	1252111	FALSE	FALSE	FALSE	TRUE
chr5_1251928+	chr5	1251928	FALSE	FALSE	FALSE	TRUE
chr5_1251884-	chr5	1251884	FALSE	FALSE	FALSE	TRUE
chr5_1251880-	chr5	1251880	FALSE	FALSE	FALSE	TRUE
chr5_1251877-	chr5	1251877	FALSE	FALSE	FALSE	TRUE
chr5_1251871-	chr5	1251871	FALSE	FALSE	FALSE	TRUE
chr5_1251867-	chr5	1251867	FALSE	FALSE	FALSE	TRUE
chr5_1251716+	chr5	1251716	FALSE	FALSE	FALSE	TRUE
chr5_1251253-	chr5	1251253	FALSE	FALSE	FALSE	TRUE
chr5_1251252+	chr5	1251252	FALSE	FALSE	FALSE	TRUE
chr5_1251249-	chr5	1251249	FALSE	FALSE	FALSE	TRUE
chr5_1250308-	chr5	1250308	FALSE	FALSE	FALSE	TRUE
chr5_1250292-	chr5	1250292	FALSE	FALSE	FALSE	TRUE
chr5_1250280-	chr5	1250280	FALSE	FALSE	FALSE	TRUE
chr5_1250240+	chr5	1250240	FALSE	FALSE	FALSE	TRUE
chr5_1249864-	chr5	1249864	FALSE	FALSE	FALSE	TRUE
chr5_1249861-	chr5	1249861	FALSE	FALSE	FALSE	TRUE
chr5_1249671+	chr5	1249671	FALSE	FALSE	FALSE	TRUE
chr5_1249661+	chr5	1249661	FALSE	FALSE	FALSE	TRUE

## Sheet: TERT_summarized_ASM
Supplementary Table S5c: Region-level TERT ASM estimates
Averaged ASM estimates for TERT regions
Achilles_ID	5kb_prior	Exon_1	Remaining_gene_body	5kb_post
ACH-000001	0.816895	0.0473633	0.802734	0.506836
ACH-000002	0.870605	0.0518188	0.84668	0.553711
ACH-000004	0.541504	0.374268	0.555664	0.229126
ACH-000005	0.574707	0.443604	0.579102	0.114746
ACH-000006	0.616211	0.000709534	0.869141	0.00061512
ACH-000007	0.813965	0.259521	0.784668	0.39917
ACH-000008	0.315674	0.233765	0.369629	0.0101166
ACH-000009	0.903809	0.104187	0.880859	0.459717
ACH-000011	0.859863	0.991211	0.787598	0.933105
ACH-000012	0.75	0.2229	0.802246	0.361328
ACH-000013	0.586426	0.0378418	0.627441	0.392578
ACH-000014	0.544922	0.164551	0.503418	0.23938
ACH-000015		0.000352144	0.819336	0.996094
ACH-000017	0.233643	0.211548	0.632324	0.0723877
ACH-000018	0.657715	0.455566	0.614258	0.0993042
ACH-000019	0.833984	0.233765	0.805176	0.505859
ACH-000020	0.803223	0.392578	0.878906	0.950195
ACH-000021	0.625		0.51123	0
ACH-000022	0.640625	0.250488	0.663574	0.433594
ACH-000023	0.864258	0.375732	0.797363	0.665039
ACH-000024	0.619141	0.67334	0.528809	0.451172
ACH-000026	0.551758	0.060791	0.372314	0.0501709
ACH-000027	0.547852	0.662598	0.691406	0.364014
ACH-000028	0.79541	0.122131	0.90625	0.614746
ACH-000031	0.828613	0.124817	0.783203	0.458008
ACH-000032	0.791504	0.435059	0.936035	0.950195
ACH-000035	0.850098	0.0242004	0.831543	0.455078
ACH-000037	0.387939	0.171021	0.526855	0.0795898
ACH-000038	0.395508	0.0748291	0.301025	0.0533752
ACH-000039	0.768555	0.131226	0.658691	0.0893555
ACH-000040	0.564941	0.311279	0.519531	0.208008
ACH-000041	0.851074	0	0.80957	0.235718
ACH-000042	0.821289	0.222412	0.841309	0.391113
ACH-000044	0.922363	0.219727	0.856445	0.718262
ACH-000045	0.599121	0.371582	0.500488	0.178101
ACH-000046	0.846191	0.0652466	0.914062	0.90625
ACH-000047	0.750977	0.097168	0.739258	0.172119
ACH-000048	0.920898	0.0272675	0.924316	0.807617
ACH-000050	0.802246	0.0773315	0.819336	0.749023
ACH-000051	0.922852	0	0.878418	0.70459
ACH-000052	0.839355	0.00662994	0.837891	0.300293
ACH-000053	0.849121	0	0.63916	0
ACH-000054	0.0906982	0.441162	0.388428	0.268311
ACH-000055	0.782227	0.0393066	0.753418	0.251953
ACH-000056	0.683105	0.0300751	0.902344	0.794922
ACH-000058	0.804199	0.0361328	0.685547	0.384033
ACH-000059	0.794434	0.35083	0.936035	0.871094
ACH-000060	0.879883	0.611816	0.874023	0.648438
ACH-000061	0.811035	0.0604858	0.917969	0.751465
ACH-000062	0.73291	0.00953674	0.703125	0.253662
ACH-000063	0.619141	0.0421143	0.637207	0.341553
ACH-000065	0.808105	0.33667	0.734863	0.380859
ACH-000066	0.869141	0.00592804	0.893555	0.604492
ACH-000067	0.393555		0.150757	0.150024
ACH-000068	0.901855	0.0141068	0.923828	0.583496
ACH-000069	0.941895	0.0207977	0.873535	0.738281
ACH-000070	0.67041	0.123962	0.946777	0.932129
ACH-000071	0.260498	0.15332	0.242676	0.0897217
ACH-000072	0.782227	0.00446701	0.846191	0.192505
ACH-000073	0.850586	0.0450439	0.834473	0.810059
ACH-000074	0.744629	0.0583496	0.839844	0.293457
ACH-000075	0.536621	0.425049	0.508301	0.227173
ACH-000076	0.713867	0.0191803	0.910645	0.282715
ACH-000077	0.816406	0.00183105	0.782715	0.496582
ACH-000078	0.147217	0.00172901	0.63623	0.0701294
ACH-000080	0.677734	0.0875854	0.575684	0.281738
ACH-000081	0.874512	0.431396	0.869629	0.804199
ACH-000082	0.748047	0.595215	0.637207	0.330566
ACH-000083	0.700195	0.171143	0.601562	0.225952
ACH-000085	0.575684	0.0238037	0.601074	0.0691528
ACH-000086	0.755859	0.0381165	0.842285	0.494873
ACH-000087	0.791992	0.0314941	0.807617	0.0857544
ACH-000089	0.726074	0.25	0.685547	0.411133
ACH-000090	0.770996	0.302734	0.682617	0.583984
ACH-000091	0.839844	0.193237	0.720215	0.37207
ACH-000092	0.644043	0.213013	0.583008	0.360352
ACH-000093	0.85791	0.0686035	0.786621	0.427246
ACH-000094	0.82373	0.345703	0.78418	0.575684
ACH-000095	0.837402	0.602539	0.847656	0.69873
ACH-000096	0.884277	0.578125	0.888672	0.747559
ACH-000097	0.784668	0.0720215	0.8125	0.480713
ACH-000098	0.3396	0.0871582	0.403564	0.122314
ACH-000099	0.589355	0.140137	0.565918	0.383301
ACH-000100	0.874023	0.737793	0.750488	0.481689
ACH-000101	0.705566	0	0.842285	1
ACH-000102	0.664551	0.331299	0.597168	0.211304
ACH-000103	0.902832	0.0170746	0.820801	0.686523
ACH-000104	0.950195	0.742188	0.940918	0.956055
ACH-000105	0.890137	0.710449	0.935059	0.928711
ACH-000106	0.844238	0.0316467	0.73877	0.65625
ACH-000107	0.928711	0.287842	0.885254	0.700195
ACH-000108	0.803223	0	0.329346	0.00217628
ACH-000109	0.809082	0.238892	0.629883	0.280762
ACH-000110	0.587402	0.0999146	0.628418	0.245117
ACH-000111	0.523438	0.0698242	0.422852	0.162109
ACH-000112	0.381104	0.119629	0.480469	0.162354
ACH-000113	0.770996	0.0700073	0.866211	0.547363
ACH-000114	0.771973	0.0148926	0.84668	0.623535
ACH-000115	0.833984	0.086731	0.800781	0.861816
ACH-000116	0.617676	0.00201607	0.452148	0.0551758
ACH-000117	0.441895	0.00852203	0.682129	0.186646
ACH-000118	0.761719	0.415527	0.695312	0.275879
ACH-000120	0.881836	0.0742188	0.845215	0.451172
ACH-000121	0.828125	0.0451965	0.799316	0.541992
ACH-000122	0.888672	0.012413	0.912598	0.558594
ACH-000123	0.856934	0.0268097	0.856445	0.516602
ACH-000124	0.616211	0.0108185	0.899414	0.750977
ACH-000125	0.624512	0.0681763	0.540039	0.221924
ACH-000126	0.870117	0.438721	0.780762	0.589355
ACH-000129	0.679199	0.100098	0.604492	0.26709
ACH-000130	0.907227	0.430176	0.95459	0.933105
ACH-000131	0.57666	0.112122	0.62207	0.399902
ACH-000132	0.760254	0.0421143	0.805176	0.513672
ACH-000133	0.490479	0.327393	0.524414	0.133911
ACH-000135	0.520996	0.0588074	0.627441	0.280762
ACH-000136	0.795898	0.283936	0.816406	0.601562
ACH-000137	0.581055	0.217163	0.62207	0.148193
ACH-000138	0.827148	0.0585938	0.779297	0.350098
ACH-000139	0.809082	0.0916138	0.845215	0.411133
ACH-000140	0.676758	0.0227509	0.793945	0.130981
ACH-000141	0.74707	0.0485535	0.772949	0.421387
ACH-000142	0.643066	0.464111	0.614258	0.164673
ACH-000144	0.879395	0.0027771	0.865723	0.584473
ACH-000145	0.750977	0.111023	0.63623	0.341553
ACH-000146	0.825684	0.392822	0.884766	0.578613
ACH-000147	0.845703	0.429688	0.658203	0.280273
ACH-000148	0.273438	0.293945	0.236694	0.0450745
ACH-000149	0.455811	0.0576782	0.549316	0.358154
ACH-000150	0.990234	0.209473	0.814453	0.398438
ACH-000151	0.730957	0.143799	0.919922	0.638184
ACH-000152	0.449463	0.378174	0.466309	0.189453
ACH-000153	0.773926	0.768066	0.709961	0.280029
ACH-000154	0.712402	0.0562439	0.711426	0.375244
ACH-000155	0.898438	0.293701	0.784668	0.496582
ACH-000156	0.845703	0.393799	0.949219	0.995605
ACH-000157	0.707031	0.531738	0.513184	0.188965
ACH-000158	0.763184	0.400146	0.844238	0.733887
ACH-000159	0.400879	0.322266	0.634277	0.511719
ACH-000161	0.73584	0.279297	0.62793	0.542969
ACH-000162	0.644043	0.041626	0.851562	0.422607
ACH-000163	0.547852	0.387695	0.575195	0.254395
ACH-000164	0.794434	0.0105896	0.791992	0.466309
ACH-000165	0.554688	0.0333862	0.584473	0.295654
ACH-000166	0.833008	0.175415	0.731934	0.584961
ACH-000167	0.428467		0.814453
ACH-000168	0.902344	0.0945435	0.881348	0.566406
ACH-000169	0.960449	0.050293	0.906738	0.480225
ACH-000171	0.922852	0.238892	0.811523	0.394775
ACH-000173	0.856934	0.0269775	0.734863	0.37085
ACH-000174	0.890625	0.192749	0.807617	0.663574
ACH-000176	0.804199	0.0353088	0.763672	0.380127
ACH-000177	0.843262	0.0708008	0.758301	0.687012
ACH-000178	0.680176	0.144287	0.553223	0.0673218
ACH-000179	0.82959	0.455078	0.789062	0.599609
ACH-000180	0.68457	0.0652466	0.675293	0.289551
ACH-000181	0.305908	0.719238	0.430176	0.0454712
ACH-000182	0.796387	0.105835	0.729492	0.308105
ACH-000183	0.666504	0.0077095	0.831543	0.915039
ACH-000184	0.643555	0.0707397	0.501953	0.276855
ACH-000186	0.838379	0.0984497	0.821777	0.452393
ACH-000187	0.773438	0.00526047	0.65625	0.438965
ACH-000188	0.648926	0.136353	0.668457	0.121399
ACH-000189	0.827637	0.0222778	0.87207	0.736816
ACH-000190	0.770508	0.0533447	0.795898	0.280029
ACH-000191	0.581055	0.384766	0.620605	0.221191
ACH-000192	0.810547		0.875	0.799805
ACH-000194	0.59668	0.00270271	0.452393	0.0339661
ACH-000195	0.627441	0.0350037	0.566895	0.158203
ACH-000196	0.844727	0.140991	0.800293	0.396484
ACH-000197	0.911621	0.539062	0.942383	0.974121
ACH-000198	0.890625	0.195435	0.915527	0.620117
ACH-000200	0.666992	0.175171	0.826172	0.509277
ACH-000201	0.856445	0.0350647	0.914062	0.755371
ACH-000202	0.569824	0.201172	0.54834	0.121399
ACH-000203	0.788574	0.401611	0.6875	0.422607
ACH-000204	0.64209	0.00411224	0.850098	0.928711
ACH-000205	0.825195	0.436768	0.807617	0.421875
ACH-000207	0.477783	0.592773	0.615234	0.20166
ACH-000209	0.888184	0.772949	0.746582	0.444092
ACH-000210	0.868652	0.0485535	0.854492	0.266357
ACH-000211	0.577148	0.0172424	0.377197	0.0726318
ACH-000212	0.770508	0.326904	0.678223	0.304932
ACH-000213	0.585938	0.00429153	0.628418	0.00284958
ACH-000214	0.54834	0.0655518	0.540527	0.176758
ACH-000217	0.444336	0.25	0.680664
ACH-000218	0.845703	0.194824	0.844238	0.740234
ACH-000219	0.411865	0.169556	0.385742	0.148315
ACH-000220	0.777344	0.00314522	0.829102	0.434082
ACH-000221	0.734375	0.240601	0.786133	0.523438
ACH-000222	0.84668	0.314209	0.806152	0.441162
ACH-000223	0.915039	0.505371	0.877441	0.583008
ACH-000225	0.61084	0.157837	0.853027	0.810547
ACH-000226	0.571777	0.536133	0.60498	0.302002
ACH-000227	0.756348	0	0.836426	0.638184
ACH-000228	0.708008	0.0601807	0.605469	0.177368
ACH-000231	0.785645	0.0618286	0.696777	0.241577
ACH-000232	0.547852	0.47583	0.498047	0.173462
ACH-000233	0.791016	0.294189	0.79541	0.461426
ACH-000234	0.80127	0.209106	0.647949	0.233765
ACH-000235	0.755371	0.431396	0.722168	0.316895
ACH-000236	0.743164	0.275391	0.650391	0.52002
ACH-000237	0.389893	0.375244	0.500977	0.188477
ACH-000238	0.420898	0.490234	0.567383	0.15564
ACH-000239	0.749023	0.0665283	0.73291	0.193604
ACH-000241	0.766602	0.0346985	0.856445	0.324951
ACH-000242	0.839355	0.302246	0.744141	0.536621
ACH-000243	0.807617	0.406738	0.699707	0.237305
ACH-000244	0.661621	0.491455	0.661133	0.35498
ACH-000245	0.724121	0.0168762	0.92041	0.874023
ACH-000247	0.741211	0.0665283	0.720215	0.302002
ACH-000248	0.218384	0.580078	0.308105	0.0448303
ACH-000249	0.794434	0.397217	0.772949	0.487061
ACH-000250	0.742188	0.391357	0.676758	0.276367
ACH-000252	0.720703	0	0.714355	0
ACH-000253	0.866699	0.468262	0.711426	0.243042
ACH-000254	0.805664	0.120361	0.825684	0.543457
ACH-000255	0.169189	0.842285	0.379395	0.186157
ACH-000256	0.661133	0.0779419	0.584473	0.067688
ACH-000257	0.903809	0.206055	0.816406	0.661133
ACH-000258	0.874512	0.381348	0.82959	0.588379
ACH-000259	0.773438	0.000185013	0.443115	1
ACH-000260	0.49292	0.0944824	0.34082	0.154175
ACH-000261	0.759766	0.209351	0.73877	0.433838
ACH-000263	0.819824		0.944824	1
ACH-000264	0.787598	0.547363	0.608887	0.252686
ACH-000265	0.611328	0.000994682	0.761719	1
ACH-000266	0.780762	0.0491028	0.830078	0.480957
ACH-000267	0.788086	0.439453	0.691406	0.478516
ACH-000268	0.703125	0.610352	0.716309	0.433105
ACH-000269	0.447754	0.628906	0.526367	0.243652
ACH-000270	0.75293	0.341309	0.651367	0.292725
ACH-000271	0.630859	0.00837708	0.917969	0.682617
ACH-000273	0.477051	0.038147	0.782227	0.0690308
ACH-000274	0.471924	0.112793	0.602539	0.324219
ACH-000276	0.691895	0.386475	0.691895	0.298096
ACH-000277	0.585938	0.427979	0.715332	0.212891
ACH-000278	0.890625	0.0339355	0.888672	0.701172
ACH-000280	0.734375	0.0803833	0.890137	0.278809
ACH-000281	0.881836	0.0168304	0.884277	0
ACH-000282	0.333252		0.45166
ACH-000285	0.445557	0.163696	0.88916	0.352783
ACH-000286	0.90332	0.256592	0.803223	0.572266
ACH-000287	0.669434	0.0485535	0.93457	0.895996
ACH-000288	0.797852	0.0786133	0.724121	0.188477
ACH-000290	0.853516	0.101379	0.820801	0.600098
ACH-000291	0.447754	0.0901489	0.504395	0.0482483
ACH-000292	0.907715	0.0112762	0.920898	0.77002
ACH-000293	0.363525		0.75293
ACH-000294	0.940918	0.0218201	0.938965	0.667969
ACH-000295	0.924316	0.206909	0.907715	0.736328
ACH-000296	0.67041	0.220215	0.63623	0.279785
ACH-000297	0.899414	0.307129	0.861816	0.870605
ACH-000298	0.92041	0.022934	0.902832	0.904785
ACH-000301	0.801758	0.0375061	0.902832	0.528809
ACH-000302	0.722168	0.0270386	0.77002	0.138672
ACH-000303	0.856934	0.11676	0.808105	0.320068
ACH-000304	0.555176	0.0632935	0.501953	0.19165
ACH-000305	0.86377	0.393799	0.85791	0.606934
ACH-000306	0.623535	0.0448608	0.60791	0.218994
ACH-000307	0.879395	0.17749	0.854004	0.439453
ACH-000308	0.859863	0.0666504	0.861816	0.469238
ACH-000309	0.796875	0.705078	0.73877	0.455811
ACH-000310	0.567383	0.00168896	0.693359	0.617676
ACH-000311	0.76123	0.321533	0.623535	0.138794
ACH-000312	0.89209	0.0480957	0.894531	0.802734
ACH-000313	0.867676	0.173462	0.882324	0.746094
ACH-000314	0.672852	0.0180817	0.555176	0.147949
ACH-000315	0.817383	0.107117	0.877441	0.632324
ACH-000316	0.604492	0.155884	0.554199	0.200195
ACH-000317	0.899414	0.2229	0.825684	0.550293
ACH-000318	0.787109	0.025116	0.723145	0.295166
ACH-000319	0.876953	0.0205688	0.869629	0.860352
ACH-000320	0.803711	0.134399	0.751465	0.404297
ACH-000321	0.92334	0.0445557	0.936523	0.831055
ACH-000322	0.377441	0.347412	0.274902	0.0793457
ACH-000323	0.727539	0.342773	0.717773	0.362061
ACH-000324	0.621094	0.0438843	0.45459	0.141846
ACH-000325	0.809082	0.30542	0.804688	0.446777
ACH-000326	0.77832	0.0691528	0.802246	0.173584
ACH-000327	0.762207	0.292236	0.604004	0.12323
ACH-000329	0.695801	0.28833	0.713867	0.219727
ACH-000330	0.291992	0.537109	0.661133	0.127686
ACH-000331	0.810547	0.057312	0.753418	0.599121
ACH-000332	0.88916	0.18396	0.854492	0.712891
ACH-000333	0.713379	0.00294113	0.764648	0.312744
ACH-000334	0.739746	0.0438232	0.841797	0.683594
ACH-000335	0.851562	0.0249481	0.853516	0.153809
ACH-000336	0.907715	0.0359802	0.919922	0.64502
ACH-000338	0.861816	0.303955	0.781738	0.644043
ACH-000340	0.683105	0.0503845	0.640625	0.281982
ACH-000341	0.224976	0.248779	0.199097	0.127319
ACH-000342	0.794922	0.525391	0.737305	0.419189
ACH-000343	0.835449	0.0106888	0.839844	0.498047
ACH-000344	0.840332	0.032959	0.853027	0.334961
ACH-000345	0.870605	0.0117188	0.881348	0.803711
ACH-000346	0.521973	0.00649261	0.788574	0.00480652
ACH-000347	0.912598	0.0679321	0.866699	0.823242
ACH-000348	0.40625	0.280518	0.524902	0.0338745
ACH-000349	0.873047	0.149048	0.737305	0.259521
ACH-000350	0.931152	0.774902	0.888184	0.768066
ACH-000351	0.851562	0.134888	0.80957	0.468262
ACH-000352	0.914551	0.111755	0.761719	0.608398
ACH-000353	0.434326	0.4729	0.555664	0.155273
ACH-000354	0.563965	0.0966797	0.561523	0.256592
ACH-000355	0.703125	0.550781	0.601562	0.351562
ACH-000356	0.905273	0.354492	0.937988	0.791504
ACH-000357	0.677246	0.0301514	0.805664	0.257324
ACH-000358	0.885254	0.00982666	0.892578	0.704102
ACH-000359	0.875488	0.0629272	0.799316	0.372803
ACH-000360	0.757812	0.20874	0.669922	0.448242
ACH-000361	0.79248	0.042572	0.815918	0.552246
ACH-000362	0.753418	0.27417	0.890137	0.368652
ACH-000363	0.743652	0.0299835	0.883301	0.604492
ACH-000364	0.665527	0.567871	0.363281	0.0681152
ACH-000365	0.868652	0.439453	0.908203	0.59668
ACH-000366	0.216187	0.011673	0.450195	0.0701904
ACH-000367	0.547363	0.492676	0.577637	0.245117
ACH-000368	0.478271	0.159912	0.479248	0.0917358
ACH-000369	0.911133	0.00411987	0.925293	0.605469
ACH-000370	0.62793	0.373535	0.640137	0.158936
ACH-000371	0.908691	0.471924	0.799316	0.639648
ACH-000372	0.891113	0.0176392	0.915039	0.9375
ACH-000373	0.872559	0.263916	0.859375	0.795898
ACH-000374	0.875977	0.0751343	0.888672	0.533691
ACH-000375	0.849609	0.056427	0.879395	0.611816
ACH-000376	0.360107	0.224121	0.422607	0.0717163
ACH-000377	0.760254	0.0555725	0.841309	0.445801
ACH-000378	0.635254	0.108215	0.586426	0.0339966
ACH-000379	0.851562	0.040802	0.85498	0.771973
ACH-000380	0.632324	0.445312	0.580078	0.743164
ACH-000381	0.790527	0.524414	0.711426	0.318848
ACH-000382	0.895996	0.822754	0.910156	0.873535
ACH-000383	0.819824	0.365479	0.78125	0.470215
ACH-000384	0.547852	0.356445	0.466064	0.0710449
ACH-000386	0.899902	0.0424805	0.935547	0.867188
ACH-000387	0.590332	0.224243	0.620117	0.267822
ACH-000388	0.858398	0.256836	0.796875	0.483887
ACH-000389	0.676758	0.724609	0.510254	0.253662
ACH-000390	0.815918	0.365723	0.575684	0.00350952
ACH-000391	0.612793	1	0.381104	0.290283
ACH-000392	0.737793	0.138306	0.764648	0.288818
ACH-000393	0.618164	0.371826	0.538086	0.247559
ACH-000394	0.888184	0.0750122	0.845215	0.635254
ACH-000396	0.510254	0.370605	0.675781	0.195557
ACH-000397	0.575684	0.672852	0.583984	0.339844
ACH-000398	0.822266	0.019043	0.833496	0.488525
ACH-000399	0.872559	0.0916748	0.898926	0.762695
ACH-000400	0.740723	0.228149	0.660156	0.24707
ACH-000401	0.471191	0.00453568	0.367676	0.0266724
ACH-000402	0.73291	0.0502625	0.909668	0.883789
ACH-000403	0.789062	0.401123	0.750488	0.3479
ACH-000404	0.66748	0.0133514	0.741699	0.154907
ACH-000405	0.817383	0.161133	0.791992	0.518066
ACH-000406	0.827637	0.754883	0.81543	0.479492
ACH-000407	0.305176	0.177368	0.421387	0.0420532
ACH-000408	0.883301	0.119568	0.84375	0.640625
ACH-000409	0.681641	0.0318909	0.54248	0.145264
ACH-000410	0.170532	0.366699	0.144043	0.00856781
ACH-000411	0.884277	0.0596619	0.819824	0.380859
ACH-000412	0.762695	0.315674	0.619141	0.21167
ACH-000414	0.652832	0.0624084	0.698242	0.168945
ACH-000415	0.206543	0.148682	0.599609	0.151001
ACH-000416	0.637207	0.486328	0.642578	0.222046
ACH-000417	0.745117	0.401367	0.666992	0.224121
ACH-000418	0.444092	0.132446	0.471191	0.136963
ACH-000419	0.84375	0.239502	0.787109	0.722656
ACH-000420	0.840332	0.0773926	0.906738	0.799316
ACH-000421	0.874023	0.407715	0.818848	0.4375
ACH-000422	0.51416	0.0419922	0.625488	0.302002
ACH-000423	0.838379	0.230835	0.735352	0.606934
ACH-000424	0.884277	0.686035	0.717285	0.714355
ACH-000425	0.8125	0.16394	0.619629	0.250244
ACH-000427	0.838867	0.370361	0.747559	0.468262
ACH-000428	0.731934	0.298828	0.760742	0.41626
ACH-000429	0.910645	0.373535	0.867188	0.575684
ACH-000430	0.695801	0.686523	0.829102	0.625977
ACH-000431	0.894043		0.982422	1
ACH-000432	0.806641	0.344482	0.933105	0.924805
ACH-000433	0.723145	0.177124	0.750977	0.270264
ACH-000434	0.791504	0.346191	0.675781	0.312988
ACH-000435	0.914062	0.258545	0.913086	0.686523
ACH-000437	0.625	0.227173	0.555664	0.174072
ACH-000438	0.893066	0.958984	0.758789	0.328125
ACH-000439	0.816895	0.0626221	0.838867	0.767578
ACH-000440	0.679199	0.045166	0.940918	0.907715
ACH-000441	0.750977	0.0244446	0.793457	0.209595
ACH-000443	0.858398	0.812988	0.858887	0.683594
ACH-000444	0.801758	0.279785	0.774902	0.428955
ACH-000445	0.526367	0.680664	0.505859	0.240112
ACH-000446	0.794434	0.246704	0.78125	0.453613
ACH-000447	0.906738	0.211548	0.815918	0.553711
ACH-000448	0.5		0.530762	0
ACH-000449	0.900879	0.383057	0.89502	0.708008
ACH-000450	0.588867	0.0834351	0.586914	0.0806274
ACH-000451	0.849609	0.0863037	0.822266	0.486328
ACH-000452	0.860352	0.0988159	0.855957	0.679199
ACH-000453	0.748047	0.128418	0.878906	0.630371
ACH-000454	0.793945	0.0650024	0.743652	0.377686
ACH-000456	0.299805	0.179565	0.362793	0.0160522
ACH-000457	0.878418	0.507812	0.748047	0.419189
ACH-000458	0.452881	0.439209	0.677734	0.176392
ACH-000459	0.782227	0.230469	0.729004	0.304443
ACH-000460	0.321533	0.0983276	0.359863	0.0293121
ACH-000461	0.851074	0.0256195	0.802734	0.314941
ACH-000462	0.82959	0.478516	0.916016	0.927246
ACH-000463	0.844727	0.0129166	0.846191	0.379395
ACH-000464	0.744141	0.156616	0.567383	0.165283
ACH-000465	0.646973	0.381592	0.512207	0.253174
ACH-000466	0.745605	0.0653687	0.580566	0.0895386
ACH-000467	0.852051	0.168945	0.877441	0.394775
ACH-000468	0.82959	0.317871	0.769531	0.393555
ACH-000469	0.752441	0.330078	0.560059	0.132202
ACH-000470	0.84668	0.463379	0.875977	0.504883
ACH-000471	0.35791	0.131104	0.342041	0.0499573
ACH-000472	0.63623	0.65918	0.640625	0.277344
ACH-000473	0.380371	0.631348	0.60498	0.133789
ACH-000475	0.0969849	0.247681	0.388184	0.0575562
ACH-000476	0.334473	0.391113	0.57666	0.246338
ACH-000477	0.372314	0.196533	0.392822	0.0570984
ACH-000478	0.328369	0.408203	0.401123	0.071228
ACH-000479	0.67041	0.399414	0.601074	0.256104
ACH-000480	0.657227	0.0769653	0.633789	0.500977
ACH-000481	0.780273	0.072937	0.684082	0.0959473
ACH-000482	0.765625	0.0395203	0.671875	0.230225
ACH-000483	0.824707	0.0373535	0.756836	0.649414
ACH-000484	0.854492	0.618652	0.762207	0.429199
ACH-000485	0.698242	0.467041	0.6875	0.2052
ACH-000486	0.574707	0.0322876	0.733398	0.611816
ACH-000487	0.538574	0.081543	0.536133	0.16748
ACH-000488	0.612305	0.3479	0.578613	0.121582
ACH-000489	0.852539	0.239746	0.720703	0.401855
ACH-000491	0.675293	0.0970459	0.628418	0.359375
ACH-000493	0.556152	0.0958252	0.74707	0.313965
ACH-000495	0.840332	0.116394	0.818848	0.488525
ACH-000496	0.784668	0.013916	0.838379	0.107605
ACH-000498	0.931152	0.0450134	0.912598	0.942871
ACH-000500	0.870117	0.429199	0.835449	0.638184
ACH-000501	0.852539	0.437012	0.761719	0.503906
ACH-000502	0.828125	0.336914	0.79248	0.503418
ACH-000503	0.668457	0.0950317	0.629883	0.188232
ACH-000504	0.563965	0.333496	0.506836	0.154297
ACH-000505	0.693359	0.518555	0.535156	0.241211
ACH-000506	0.888672	0.0275421	0.879883	0.810059
ACH-000507	0.199951	0.25	0.593262	0.0029068
ACH-000508	0.900879	0.278076	0.711914	0.401855
ACH-000509	0.880859	0.14917	0.859863	0.733887
ACH-000510	1		0.888184	0.332764
ACH-000511	0.744629	0.592285	0.695312	0.327637
ACH-000513	0.746582	0.144165	0.779785	0.331543
ACH-000514	0.854004	0.203491	0.84082	0.72998
ACH-000515	0.875977	0.0176239	0.847656	0.804199
ACH-000517	0.848145	0.487305	0.787109	0.644043
ACH-000518	0.459961	0.596191	0.760742	0.10321
ACH-000519	0.900391	0.0183258	0.93457	0.884766
ACH-000520	0.379395	0.301025	0.489746	0.109741
ACH-000521	0.820312	0.0472412	0.740723	0.542969
ACH-000522	0.775879	0.497559	0.742676	0.619141
ACH-000523	0.855957	0.92334	0.662109	0.623535
ACH-000524	0.083313		0.812988	0
ACH-000525	0.90332	0.111206	0.851562	0.851074
ACH-000526	0.284668	0.0123215	0.253174	0.0437317
ACH-000527	0.795898	0.142944	0.762695	0.212158
ACH-000528	0.887207	0.556152	0.819336	0.50293
ACH-000529	0.575195	0.0857544	0.606934	0.212402
ACH-000530	0.898438	0.0253601	0.90625	0.73584
ACH-000532	0.777832	0.114441	0.666504	0.223633
ACH-000534	0.661621	0.024765	0.865723	0.674805
ACH-000535	0.506836	0.285889	0.506348	0.0669556
ACH-000536	0.864258	0.707031	0.8125	0.628418
ACH-000537	0.248901	0.328613	0.600098	0.156616
ACH-000538	0.676758		0.694336	0.664551
ACH-000539	0.587402	0.301758	0.609863	0.318848
ACH-000540	0.625	0.139648	0.605469	0.186279
ACH-000541	0.791016	0.549805	0.875	0.737793
ACH-000542	0.791992	0.581055	0.67041	0.284668
ACH-000543	0.689941	0.439209	0.603027	0.339844
ACH-000544	0.727539	0.39624	0.651855	0.182861
ACH-000545	0.604492	0.759277	0.609375	0.128906
ACH-000546	0.692383	0.178833	0.784668	0.357666
ACH-000547	0.286865	0.477539	0.361572	0.112427
ACH-000548	0.452881	0.800293	0.571289	0.163086
ACH-000549	0.586914	0.369385	0.656738	0.211548
ACH-000550	0.833008	0.391113	0.67041	0.366455
ACH-000551	0.40625	0.167603	0.36084	0.0527344
ACH-000552	0.812012		0.525391
ACH-000553	0.663086	0.315186	0.683105	0.246338
ACH-000554	0.846191	0.109863	0.77832	0.492676
ACH-000555	0.913086	0.615723	0.785156	0.639648
ACH-000557	0.897949	0.396973	0.873047	0.885254
ACH-000558	0.825684	0.644043	0.788574	0.456787
ACH-000559	0.870117	0.615723	0.858398	0.839355
ACH-000560	0.827148	0.570312	0.867188	0.834961
ACH-000561	0.79834	0.0940552	0.720703	0.157837
ACH-000562	0.762695	0.0317383	0.736328	0.264648
ACH-000563	0.865234	0.403076	0.768555	0.552734
ACH-000564	0.581055	0.285889	0.45752	0.250244
ACH-000565	0.468994	0.44165	0.541504	0.324707
ACH-000566	0.84375	0.333984	0.760254	0.41333
ACH-000567	0.635742	0.640625	0.940918	0.869141
ACH-000568	0.908691	0.041748	0.899414	0.848633
ACH-000569	0.74707		0.862305
ACH-000570	0.430176	0.344238	0.47583	0.0386047
ACH-000572	0.425049	0.0298309	0.357666	0.0501404
ACH-000573	0.890625	0.164795	0.753418	0.308838
ACH-000574	0.851074	0.0158539	0.800781	0.639648
ACH-000576	0.703613	0.403564	0.89502	0.859375
ACH-000577	0.122803	0	0.617188	0
ACH-000578	0.862793	0.118835	0.889648	0.75
ACH-000579	0.621582	0.0574646	0.584961	0.0437622
ACH-000580	0.741211	0.616699	0.734863	0.338135
ACH-000581	0.779785	0.432617	0.815918	0.448975
ACH-000582	0.715332	0.122131	0.388184	0.0985107
ACH-000583	0.646973		0.894531
ACH-000584	0.946289	0.466553	0.728516	0.666016
ACH-000585	0.865234	0.156982	0.832031	0.765625
ACH-000586	0.89502	0.460205	0.841309	0.60498
ACH-000587	0.88916	0.343018	0.856934	0.685059
ACH-000588	0.333252		0.604004	1
ACH-000589	0.697266	0.0210724	0.561523	0.0656738
ACH-000592	0.589355	0.790527	0.358887	0.0831909
ACH-000593	0.895996	0.268311	0.803711	0.507812
ACH-000594	0.911133	0.147705	0.922852	0.846191
ACH-000595	0.342285	0.371826	0.427002	0.0830688
ACH-000596	0.720703	0.453857	0.729004	0.279297
ACH-000598	0.513184	0.0634766	0.874512	0.921875
ACH-000599	0.842285	0.251709	0.750977	0.503906
ACH-000601	0.766113	0	0.842773
ACH-000602	0.668457	0.172485	0.773438	0.495605
ACH-000603	0.884766	0.234619	0.772461	0.685059
ACH-000604	0.746582	0.917969	0.693359	0.239746
ACH-000605	0.860352	0.665039	0.723145	0.330566
ACH-000606	0.830566	0.00995636	0.750488	0.318604
ACH-000607	0.839355	0.309814	0.834961	0.586914
ACH-000608	0.540527	0.263916	0.499512	0.0994873
ACH-000609	0.69043	0.442383	0.689941	0.223633
ACH-000610	0.736816	0.0213318	0.726074	0.633789
ACH-000611	0.570801	0.0366516	0.834961	0.513184
ACH-000612	0.9375	0.0237427	0.925293	0.876953
ACH-000613	0.882324	0.078125	0.873535	0.335693
ACH-000614	0.621582	0.402588	0.521484	0.0991211
ACH-000615	0.585449	0.310059	0.549316	0.161011
ACH-000616	0.631348	0.912109	0.604004	0.279297
ACH-000617	0.720215	0.0487366	0.726562	0.364502
ACH-000618	0.888184	0.505371	0.804688	0.683594
ACH-000619	0.819824	0.334229	0.753906	0.261719
ACH-000620	0.214233	0.285645	0.754395	0.166626
ACH-000621	0.726074	0.067627	0.652344	0.308838
ACH-000622	0.342285	0.533203	0.440186	0.000989914
ACH-000623	0.57373	0.175659	0.387939	0.0754395
ACH-000624	0.590332	0.0461426	0.63623	0.165771
ACH-000625	0.428467	0.0866699	0.38501	0.152588
ACH-000626	0.757812	0.336914	0.606445	0.348389
ACH-000627	0.640625	0.215698	0.65625	0.380127
ACH-000628	0.799316	0.421875	0.716797	0.428467
ACH-000630	0.789062	0.340576	0.775391	0.404053
ACH-000631	0.324707	0.797852	0.564941	0.398193
ACH-000632	0.430664	0.0566406	0.509277	0.0624084
ACH-000633	0.663086	0.0462341	0.775391	0.24646
ACH-000635	0.92041	0.0332947	0.884277	0.847168
ACH-000636	0.90918	0.330322	0.946289	0.98584
ACH-000637	0.826172	0.792969	0.849609	0.747559
ACH-000638	0.819824	0.666504	0.74707	0.516113
ACH-000639	0.891113	0.0118637	0.711426	0.0507812
ACH-000640	0.375732	0.0740356	0.254639	0.0318298
ACH-000641	0.770996	0.299072	0.791504	0.561035
ACH-000643	0.44458	0.315674	0.501953	0.111206
ACH-000644	0.72168	0.0778198	0.614258	0.0709839
ACH-000645	0.805176	0.126343	0.722656	0.260986
ACH-000646	0.786621	0.0825195	0.762207	0.379883
ACH-000647	0.889648	0.873535	0.888184	0.856934
ACH-000648	0.81543	0.415771	0.693848	0.301514
ACH-000649	0.645508	0.452637	0.694824	0.202148
ACH-000650	0.575195	0.142944	0.564941	0.347168
ACH-000651	0.90332	0.560059	0.794922	0.428223
ACH-000652	0.794434	0.479492	0.700684	0.304932
ACH-000653	0.875		0.739746	0.393066
ACH-000654	0.830078	0.556152	0.890625	0.735352
ACH-000655	0.695801	0.439697	0.711914	0.25293
ACH-000656	0.865723	0.383057	0.913574	0.911621
ACH-000657	0.90918	0.00193405	0.897461	0.547852
ACH-000659	0.896973	0.204712	0.766113	0.59082
ACH-000660	0.670898	0.245728	0.918945	0.787109
ACH-000661	0.417236	0.21521	0.446045	0.0804443
ACH-000662	0.670898	0.312988	0.779785	0.476074
ACH-000664	0.810547	0.611816	0.720215	0.566406
ACH-000665	0.493164	0.0315247	0.619629	0.062439
ACH-000666	0.837402		0.932129	1
ACH-000667	0.70752	0.371094	0.660156	0.144287
ACH-000668	0.344482	0.134766	0.450195	0.150513
ACH-000669	0.885254	0.455078	0.877441	0.84082
ACH-000670	0.865234	0.0158844	0.879395	0.733398
ACH-000671	0.583496	0.830078	0.668945	0.187744
ACH-000672	0.334717	0.983887	0.567871	0.727051
ACH-000674	0.807617	0.462891	0.684082	0.00624847
ACH-000675	0.867676	0.083313	0.862793	0
ACH-000677	0.87793	0.713867	0.857422	0.795898
ACH-000678	0.625977	0.289307	0.602051	0.224487
ACH-000679	0.916504	0.0661011	0.834961	0.390381
ACH-000680	0.842773	0.26416	0.765137	0.436279
ACH-000681	0.897949	0.0211182	0.88623	0.714844
ACH-000682	0.901855	0.247925	0.815918	0.842773
ACH-000683	0.78418	0.0150757	0.715332	0.256592
ACH-000684	0.849121	0.35376	0.805176	0.233643
ACH-000685	0.648438	0.0579224	0.578613	0.13855
ACH-000686	0.58252	0.67041	0.476562	0.167358
ACH-000687	0.879395	0.467041	0.851562	0.786621
ACH-000688	0.84082	0.0983276	0.744141	0.457764
ACH-000689	0.852539	0.649902	0.788574	0.326172
ACH-000691	0.950684	0.435547	0.893066	0.889648
ACH-000692	0.462158	0.520508	0.574707	0.0684814
ACH-000693	0.716309	0.845215	0.705078	0.530273
ACH-000694	0.795898	0.0665894	0.825684	0.322998
ACH-000695	0.745117	0.535156	0.723145	0.50293
ACH-000696	0.839844	0.292236	0.874023	0.660156
ACH-000697	0.624023	0.0398254	0.802734	0.755371
ACH-000698	0.62793	0.000741482	0.820312	0.817871
ACH-000699	0.831055	0.0874634	0.891602	0.704102
ACH-000701	0.862793	0.512695	0.748535	0.407715
ACH-000702	0.84082	0.406494	0.773926	0.618164
ACH-000703	0.875	0.411377	0.916992	0.796875
ACH-000704	0.937012	0.164551	0.903809	0.782715
ACH-000705	0.895996	0.169922	0.740234	0.569824
ACH-000706	0.79248	0.131226	0.808594	0.311279
ACH-000707	0.908203	0.0284729	0.951172	0.932129
ACH-000708	0.891113	0.00870514	0.865234	0.498047
ACH-000709	0.869141	0.220215	0.854492	0.589844
ACH-000710	0.905762	0.154297	0.799316	0.560059
ACH-000711	0.444336	0.000539303	0.753418
ACH-000712	0.897461	0.0974121	0.883789	0.815918
ACH-000713	0.810547	0.0559692	0.731445	0.438721
ACH-000714	0.895508	0.417725	0.874512	0.672852
ACH-000715	0.454346	0.248535	0.625	0.259521
ACH-000716	0.854004	0.286621	0.787598	0.560059
ACH-000717	0.930176	0.322266	0.856445	0.488037
ACH-000718	0.931152	0.151978	0.916016	0.89209
ACH-000719	0.603027	0.206909	0.561523	0.283203
ACH-000720	0.54248	0.0147934	0.768066	0.162354
ACH-000721	0.81543	0.509766	0.771973	0.433105
ACH-000722	0.569824	0.287109	0.444092	0.32666
ACH-000723	0.731445	0.536133	0.71875	0.317627
ACH-000724	0.0491638	0	0.369629	0.000461578
ACH-000725	0.667969	0.182251	0.61084	0.126953
ACH-000726	0.685059	0.604004	0.542969	0.15918
ACH-000727	0.517578	0.052948	0.479004	0.236816
ACH-000728	0.562988	0.0871582	0.937988	0.916016
ACH-000729	0.953613	0.265625	0.865234	0.774414
ACH-000730	0.484131	0.0338745	0.422607	0.0806885
ACH-000731	0.79834	0.406006	0.737305	0.475342
ACH-000732	0.578613	0.111206	0.627441	0.0551147
ACH-000733	0.759277	0.509766	0.636719	0.296387
ACH-000734	0.840332	0.608398	0.803711	0.613281
ACH-000735	0.744629	0.203613	0.702637	0.134155
ACH-000736	0.898926	0.384521	0.709961	0.355957
ACH-000737	0.916504	0	0.955566	1
ACH-000738	0.60498	0.585938	0.505859	0.233276
ACH-000739	0.291992	0	0.518555	0.174316
ACH-000740	0.918457	0.649902	0.869629	0.726562
ACH-000741	0.29541	0.741699	0.317627	0.0209808
ACH-000742	0.694824	0.122437	0.565918	0.448486
ACH-000743	0.868652	0.0649414	0.914062	0.872559
ACH-000744	0.751465	0.504395	0.460205	0.279785
ACH-000745	0.601562	0.0327454	0.895508	0.669434
ACH-000746	0.601562	0.537109	0.662109	0.290039
ACH-000747	0.600098		0.736816	0.666504
ACH-000748	0.504883	0.60498	0.571777	0.212769
ACH-000749	0.865234	0.310791	0.77832	0.564941
ACH-000750	0.591309	0.344482	0.750488	0.404785
ACH-000751	0.554199	0.310791	0.551758	0.289795
ACH-000752	0.0909424	0.460449	0.359619	0.0349121
ACH-000753	0.589355	0.157471	0.557617	0.0427246
ACH-000754	0.823242	0.427734	0.75293	0.577637
ACH-000755	0.60791	0.0491028	0.847168	0.295898
ACH-000756	0.414307	0.311768	0.507324	0.033905
ACH-000758	0.890137	0.00531387	0.879395	0.703125
ACH-000759	0.860352	0.270996	0.923828	0.886719
ACH-000761	0.769043	0.362061	0.64209	0.179077
ACH-000762	0.680664	0.315674	0.668945	0.115356
ACH-000763	0.862305	0.192383	0.814941	0.658691
ACH-000764	0.899902	0.0269623	0.914062	0.883301
ACH-000765	0.641602	0.195679	0.693359	0.118591
ACH-000766	0.867676	0.154053	0.761719	0.236572
ACH-000767	0.855957	0.00212479	0.741699	0.772461
ACH-000768	0.734375	0.762695	0.641602	0.460449
ACH-000769	0.842773	0.0491333	0.766113	0.519043
ACH-000770	0.844238	0.207031	0.700195	0.434082
ACH-000771	0.899414	0.335693	0.798828	0.30127
ACH-000772	0.844727	0.413574	0.837402	0.450928
ACH-000773	0.276367		0.836426	1
ACH-000774	0.67627	0.00748444	0.731445	0.222046
ACH-000775	0.797363	0.19104	0.830566	0.569824
ACH-000776	0.423584	0.506348	0.459229	0.0474243
ACH-000777	0.793945	0.242798	0.799316	0.327637
ACH-000778	0.697754	0.393066	0.797363	0.55127
ACH-000780	0.883789	0.711914	0.900391	0.873047
ACH-000781	0.825684	0.0379944	0.863281	0.477051
ACH-000782	0.881348	0.446045	0.940918	0.983398
ACH-000783	0.897461	0.62793	0.842773	0.580566
ACH-000784	0.725098		0.714844	0.334229
ACH-000785	0.492188	0.0224152	0.397705	0.0570984
ACH-000786	0.900879	0.448975	0.9375	0.921875
ACH-000787	0.793945	0.149658	0.733398	0.0679932
ACH-000788	0.569336	0.0543823	0.556152	0.224731
ACH-000789	0.883301	0.354248	0.82666	0.760742
ACH-000790	0.803223	0.338379	0.771973	0.401855
ACH-000791	0.895996	0.47168	0.775391	0.632324
ACH-000792	0.665527	0.685059	0.721191	0.150146
ACH-000793	0.835449	0.54541	0.455078	1
ACH-000794	0.67334	0.47168	0.718262	0.255371
ACH-000795	0.880371	0.167603	0.911621	0.911621
ACH-000796	0.816895	0.738281	0.758301	0.424072
ACH-000797	0.545898	0.216553	0.639648	0.3479
ACH-000798	0.583008	0.33667	0.509277	0.117188
ACH-000799	0.814941	0.168579	0.729492	0.405762
ACH-000800	0.320312	0.380371	0.355469	0.101685
ACH-000801	0.486084	0.258789	0.575684	0.0934448
ACH-000802	0.623535	0.293213	0.639648	0.0800781
ACH-000803	0.862305	0.529297	0.79834	0.811523
ACH-000804	0.52832	0.188232	0.539551	0.148682
ACH-000805	0.457275	0.237915	0.390869	0.161987
ACH-000806	0.818848	0.490234	0.777832	0.558594
ACH-000807	0.857422	0.0369568	0.92041	0.755371
ACH-000808	0.274658	0.523926	0.36084	0.133057
ACH-000809	0.435547	0.998535	0.501953
ACH-000810	0.586426	0.275635	0.594727	0.216187
ACH-000811	0.825195	0.022583	0.741699	0.29834
ACH-000812	0.769531	0.0828247	0.84375	0.460449
ACH-000813	0.830566	0.859375	0.84668	0.804199
ACH-000814	0.353516	0.143677	0.430908	0.0774536
ACH-000815	0.665039	0.523926	0.463379	0.219482
ACH-000816	0.844727	0.0516663	0.70459	0.480713
ACH-000817	0.794434	0.0629883	0.757324	0.440186
ACH-000818	0.799805	0.0316467	0.859863	0.663086
ACH-000819	0.472656	0.908203	0.869141	0.199951
ACH-000820	0.83252	0.203125	0.781738	0.34668
ACH-000821	0.800293	0.0174408	0.868652	0.414307
ACH-000822	0.550293	0.212524	0.532715	0.058075
ACH-000823	0.583496	0.98291	0.556641	0.782715
ACH-000824	0.568848	0.0739136	0.599121	0.0124969
ACH-000825	0.600586	0.865234	0.577637	0.209473
ACH-000826	0.753418	0.417725	0.742188	0.31543
ACH-000827	0.731934	0.19751	0.518555	0.241089
ACH-000828	0.44873	0.325195	0.776855	0.305176
ACH-000829	0.799316		0.82959	0.692383
ACH-000830	0.891602	0.450684	0.859863	0.80127
ACH-000831	0.793945	0.387451	0.814453	0.426758
ACH-000832	0.708496	0.606445	0.67627	0.223633
ACH-000833	0.789551	0.884277	0.657715	0.57666
ACH-000834	0.754883	0.145142	0.768066	0.365967
ACH-000835	0.441895	0.00871277	0.530273	0.288818
ACH-000836	0.583008	0.538574	0.599121	0.211914
ACH-000837	0.821289	0.333496	0.599609	0.295166
ACH-000838	0.679688	0.0126114	0.914062	0.962402
ACH-000839	0.569336	0.543457	0.647461	0.156982
ACH-000840	0.745605	0.466797	0.651367	0.357178
ACH-000841	0.890625	0.23584	0.79834	0.488281
ACH-000842	0.873047	0.621094	0.821777	0.757812
ACH-000843	0.851074	0.631348	0.657227	0.187866
ACH-000844	0.868164	0.0474548	0.810547	0.740234
ACH-000845	0.720703	0.462158	0.630371	0.22937
ACH-000846	0.854004	0.613281	0.8125	0.510254
ACH-000847	0.915039	0.435303	0.779297	0.296875
ACH-000848	0.576172		0.952148	0.00415039
ACH-000849	0.822754	0.247681	0.65332	0.202393
ACH-000850	0.616699	0.23999	0.685547	0.174927
ACH-000851	0.838867	0.255127	0.815918	0.327637
ACH-000852	0.79541	0.00248337	0.416992	0.00702286
ACH-000853	0.894531	0.0208282	0.918457	0.836914
ACH-000855	0.453857	0.800781	0.573242	0.5
ACH-000856	0.532715	0.0187073	0.803711	0.0883179
ACH-000857	0.317139	0.1427	0.396484	0.046936
ACH-000858	0.739258	0	0.666992	0.275635
ACH-000859	0.774902	0.738281	0.650879	0.294189
ACH-000860	0.870605	0.0523376	0.682129	0.529297
ACH-000861	0.805664	0.195801	0.839844	0.328613
ACH-000862	0.585938	0.736816	0.648926	0.16687
ACH-000863	0.562988	0.382568	0.55127	0.153687
ACH-000864	0.799316	0.439209	0.880371	0.580566
ACH-000865	0.6875	0.000660896	0.694336	0.999023
ACH-000866	0.117676	0	0.533203	0.76123
ACH-000867	0.909668	0.00732422	0.736816	0.512695
ACH-000868	0.846191	0.104065	0.749023	0.223389
ACH-000869	0.881836	0.0191803	0.921387	0.858398
ACH-000870	0.86377	0.0222626	0.790527	0.552246
ACH-000871	0.837402	0.451904	0.83252	0.602539
ACH-000873	0.557129	0.997559	0.794434	0.0913696
ACH-000874	0.844727	0.473389	0.921387	0.943359
ACH-000875	0.825684	0.179321	0.798828	0.700684
ACH-000876	0.370361	0.0236359	0.273682	0.0170593
ACH-000877	0.890137	0.619141	0.840332	0.753418
ACH-000878	0.775879	0.0122299	0.796875	0.224731
ACH-000879	0.814941	0.343262	0.687012	0.217163
ACH-000880	0.890137	0.439453	0.853516	0.569824
ACH-000881	0.750977	0.287354	0.589844	0.306641
ACH-000882	0.457764	0.38916	0.376709	0.117493
ACH-000883	0.800293	0.097168	0.843262	0.874512
ACH-000884	1		0.379395	0.00537491
ACH-000885	0.593262	0.0609131	0.797363	0.152222
ACH-000886	0.717285	0.276855	0.724609	0.237183
ACH-000888	0.830078	0.133057	0.727539	0.375732
ACH-000889	0.590332	0.004776	0.866699	0.904785
ACH-000890	0.778809	0.126587	0.795898	0.669434
ACH-000891	0.831055	0.138306	0.681152	0.374756
ACH-000892	0.811035	0	0.932617
ACH-000893	0.865723	0.0634155	0.71875	0.171875
ACH-000894	0.512207	0.223022	0.537598	0.164307
ACH-000895	0.793457	0.39917	0.73291	0.244751
ACH-000896	0.570801	0.462158	0.515137	0.102295
ACH-000897	0.387695	0.171021	0.589355	0.193237
ACH-000898	0.855469	0.488525	0.807129	0.435791
ACH-000899	0.483643	0.229126	0.451416	0.04599
ACH-000900	0.869629	0.0333862	0.881348	0.797363
ACH-000901	0.80127	0.260986	0.680176	0.158813
ACH-000903	0.441162	0.17041	0.585449	0
ACH-000904	0.890137	0.297852	0.821777	0.855469
ACH-000905	0.540039	0.67041	0.661133	0.290527
ACH-000906	0.419189	0.446533	0.432861	0.170898
ACH-000907	0.833496	0.293701	0.825195	0.518555
ACH-000908	0.72168	0.397461	0.650391	0.210938
ACH-000909	0.796387	0.110901	0.734863	0.306396
ACH-000910	0.753418	0.99707	0.518066	0.0284119
ACH-000911	0.680176	0.117493	0.658691	0.297363
ACH-000912	0.895508	0.0672607	0.935547	0.742676
ACH-000913	0.880859	0.040741	0.689453	0.245117
ACH-000914	0.839355	0.0949097	0.914062	0.847656
ACH-000915	0.776855	0.292236	0.528809	0.314453
ACH-000916	0.816895	0.448975	0.743164	0.39209
ACH-000917	0.728516	0.236816	0.643555	0.18811
ACH-000918	0.96875	0.309082	0.862305	0.90332
ACH-000919	0.583496	0	0.338135
ACH-000920	0.842285	0.560059	0.947754	0.891602
ACH-000921	0.713867	0.0375061	0.67334	0.145874
ACH-000922	0.505859	0.0104446	0.878906	0.872559
ACH-000923	0.751953	0.0715332	0.841309	0.905273
ACH-000924	0.450684	0.0487366	0.536133	0.14917
ACH-000925	0.436035	0.395508	0.513672	0.232544
ACH-000926	0.712402	0.403564	0.751953	0.583496
ACH-000927	0.811035	0.0484619	0.814453	0.782227
ACH-000928	0.494873	0.135132	0.506836	0.0473022
ACH-000929	0.623047	0.105591	0.506348	0.0679321
ACH-000930	0.82959	0.581543	0.663574	0.334961
ACH-000931	0.547852	0.136475	0.62207	0.155029
ACH-000932	0.878418	0.396484	0.866699	0.771484
ACH-000933	0.695801	0.445801	0.634277	0.345703
ACH-000934	0.84082	0.0828247	0.73584	0.510742
ACH-000935	0.568848	0.427246	0.561523	0.172607
ACH-000936	0.842285	0.13147	0.804688	0.208496
ACH-000937	0.88623	0.0538635	0.92627	0.945801
ACH-000938	0.833008	0.361328	0.912109	0.897949
ACH-000939	0.880371	0.0808716	0.916992	0.618164
ACH-000940	0.783203	0.168823	0.786133	0.445312
ACH-000941	0.852539	0.158325	0.756836	0.376953
ACH-000942	0.892578	0.302734	0.90625	0.948242
ACH-000943	0.817383	0.503906	0.787109	0.547363
ACH-000944	0.881348	0.0105209	0.918945	0.913086
ACH-000945	0.688477	0.135986	0.815918	0.561523
ACH-000946	0.866211	0.310303	0.725098	0.26001
ACH-000947	0.739746	0.0261688	0.822754	0.428467
ACH-000948	0.508301	0.465576	0.456299	0.0460205
ACH-000949	0.661621	0.300537	0.601562	0.246704
ACH-000950	0.642578	0.470703	0.54834	0.074646
ACH-000951	0.576172	0.0193634	0.712402	0.144287
ACH-000952	0.737793	0.0152283	0.601074	0.0758667
ACH-000953	0.909668	0.379883	0.912109	0.894043
ACH-000954	0.881348	0.268799	0.801758	0.54834
ACH-000955	0.720215	0.0534058	0.777344	0.399902
ACH-000956	0.553711	0.0475769	0.796875	0.420654
ACH-000957	0.78125	0.219971	0.604004	0.200439
ACH-000958	0.900879	0.4375	0.850098	0.567383
ACH-000959	0.83252	0.335205	0.737305	0.259766
ACH-000960	0.90332	0.0144653	0.935547	0.960938
ACH-000961	0.634766		0.687012	1
ACH-000962	0.892578	0.121094	0.853516	0.508789
ACH-000963	0.881348	0.367188	0.819824	0.435547
ACH-000964	0.935059	0.471924	0.929199	0.936523
ACH-000965	0.850098	0.449951	0.84668	0.541016
ACH-000966	0.815918	0.029007	0.704102	0.187744
ACH-000967	0.601562	0.0621948	0.609375	0.133789
ACH-000968	0.533691	0.360107	0.686035	0.356689
ACH-000969	0.865723	0.490479	0.912598	1
ACH-000970	0.72168	0.414795	0.787109	0.463867
ACH-000971	0.924316	0.11676	0.921875	0.603516
ACH-000972	0.634766	0.535645	0.67041	0.134766
ACH-000973	0.748535	0.753906	0.738281	0.341797
ACH-000974	0.812012	0.448975	0.730469	0.469727
ACH-000976	0.740723	0.615723	0.699219	0.297607
ACH-000977	0.814453	0.306152	0.712891	0.271484
ACH-000978	0.924805	0.0662231	0.914062	0.777832
ACH-000979	0.913574	0.0852051	0.935547	0.443848
ACH-000980	0.775391	0.242188	0.602051	0.611816
ACH-000981	0.799805	0.308105	0.894531	0.822754
ACH-000982	0.554688	0.110596	0.803223	0.370117
ACH-000983	0.741699	0	0.823242	0.671387
ACH-000984	0.844727	0.84375	0.816895	0.557129
ACH-000985	0.904297	0.790039	0.766113	0.521973
ACH-000986	0.836426	0.09198	0.770508	0.436768
ACH-000987	0.137573	0.00641251	0.506348	0.40918
ACH-000988	0.533203	0.000339746	0.651367	0.502441
ACH-000989	0.816406	0.0342102	0.771484	0.308838
ACH-000990	0.888672	0.792969	0.944336	0.947266
ACH-000991	0.843262	0.222412	0.817871	0.350098
ACH-000992	0.84375	0.38208	0.848145	0.503906
ACH-000993	0.907227	0.509277	0.882324	0.685547
ACH-000994	0.733887	0.019516	0.663574	0.167969
ACH-000995	0.720703	0.243652	0.750488	0.443604
ACH-000996	0.788574	0.528809	0.755859	0.259033
ACH-000997	0.861328	0.509277	0.711914	0.358887
ACH-000998	0.850586	0.369141	0.833984	0.382812
ACH-000999	0.84375	0	0.881348	0.382812
ACH-001016	0.609863	0.43457	0.5625	0.052124
ACH-001048	0.348389	0.064209	0.314209	0.0220337
ACH-001063	0.889648	0.400635	0.833984	0.624512
ACH-001075	0.734375	0.565918	0.649902	0.286377
ACH-001078	0.819336	0.0225983	0.693848	0.124084
ACH-001093	0.668945	0.0370483	0.716797	0.393311
ACH-001106	0.859863	0.408203	0.936035	0.969727
ACH-001129	0.885742	0.0300751	0.887207	0.495117
ACH-001130	0.805664	0.359863	0.821777	0.48877
ACH-001150	0.729004	0.535156	0.631836	0.254395
ACH-001151	0.588867	0.779785	0.553223	0.23291
ACH-001162	0.92627	0.468262	0.865723	0.729492
ACH-001190	0.591309	0.0373535	0.694336	0.0445862
ACH-001239	0.37793	0.130005	0.511719	0.0703735
ACH-001306	0.325684	0.32251	0.456543	0.0650635
ACH-001307	0.52832	0.206055	0.490967	0.132935
ACH-001318	0.454102	0.0368347	0.47876	0.228271
ACH-001321	0.693359	0.0689697	0.857422	0.823242

## Sheet: TERT_CpG_methylation
Supplementary Table S5d: Absolute CpG methylation at the TERT locus
CpG-level RRBS methylation estimates for TERT within 5kb of the gene start and end
Achilles_ID	chr5_1249661+	chr5_1249671+	chr5_1249861-	chr5_1249864-	chr5_1250240+	chr5_1250280-	chr5_1250292-	chr5_1250308-	chr5_1251249-	chr5_1251252+	chr5_1251253-	chr5_1251716+	chr5_1251867-	chr5_1251871-	chr5_1251877-	chr5_1251880-	chr5_1251884-	chr5_1251928+	chr5_1252111-	chr5_1252123-	chr5_1252127-	chr5_1253548+	chr5_1253655-	chr5_1253670-	chr5_1253688+	chr5_1253703+	chr5_1253760-	chr5_1253779-	chr5_1253787+	chr5_1253788-	chr5_1253790+	chr5_1253879-	chr5_1253917+	chr5_1253927+	chr5_1253938+	chr5_1254014-	chr5_1254026-	chr5_1254374+	chr5_1254380+	chr5_1254590+	chr5_1254593+	chr5_1254596+	chr5_1254612+	chr5_1254682-	chr5_1255602+	chr5_1255615+	chr5_1256759+	chr5_1256870-	chr5_1257562+
ACH-000001	0.799805	0.342773	0.887695	0.852051	0.419434	0.438965	0.0952148	0.0476074	0.571289	0.846191	0.619141	0.109253	0.350098	0.899902	0.350098	0.5	0.199951	0.25	0.525391	0.830566	0.707031	0.890625	0.881348	0.899902	0.936523	0.909668	0.913574	0.913574	0.727051	0.98291	0.523926	0.885742	0.981445	1	0.90918	0.89209	0.756836	0.333252	0.733398	1	0.600098	0.933105	0.8125	1	0.353027	0.529297	0.416748	0.688965	0.960449
ACH-000002	0.394775	0.0789185	0.730957	1	0.0666504	0.153809	0	0	0.350098	0.944336	0.799805	0.928711	0.8125	0.9375	0.375	0.75	0.25	0.571289	0.893555	0.680664	0.915039	0.692383	0.729492	1	0.98291	0.931152	0.931152	1	0.95459	0.766602	0.818359	0.950195	1	0.976074	0.975586	0.828613	0.542969	0.958496	0.916504	1	1	0.916504	1	1	0.5	1	1	0.737793	1
ACH-000004	0.538574	0.0943604	0.0638428	0.127686	0.0625	0.0810547	0	0.0789185	0.241333	0.353027	0.275879	0.333252	0.162109	0.459473	0.297363	0.378418	0.378418	0.0952148	0.188721	0.1698	0.434082	0.344727	0.253662	0.298584	0.70459	0.477295	0.563477	0.563477	0.582031	0.49292	0.345459	0.489746	0.78125	0.967773	0.871094	0.244385	0.277832	0.5625	0.4375	0.758789	0.482666	0.655273	0.51709	0.773438	0.333252	0.388916	0.272705	0.189209	0.944336
ACH-000005	0.118408	0	0	0.0800171	0.125	0.161255	0.161255	0.129028	0.0666504	0.192261	0.0666504	0.224976	0.020401	0.0212708	0.102051	0.216553	0.346924		0.0655518	0	0.196777	0.630371	0	0	0.82666	0.613281	1	0.927246	0.910645	0.927246	0.403564	0.692383	0.90918	0.910156	0.799805	0	0	0.666504	0.799805	0.305664	0.309814	0.197144	0.0416565	0.555664	0.799805	0.0800171	0.0598145	0.519043	0.966309
ACH-000006			0	0															0.00307655	0	0												0.99707	1	0.99707
ACH-000007	0.410645	0.145142	0.532227	0.983887	0.860352	0.692383	0.230713	0.47998	0.814941	0.84375	1	0.25	0	0.295898	0	0.224487	0.0714111	0.184204	0.112366	0.0112381	0.235962	0.406006	0.917969	0.986328	0.917969	0.983398	0.986816	0.961426	0.760742	0.856934	0.739258	1	1	1	0.904785	0.944336	1	0.799805	0.638184	1	0.983398	0.966797	0.868652	0.967773	0.741211	0.626953	0.496094	0.521484	1
ACH-000008	0	0	0	0	0.0196075	0	0	0	0.0476074	0.0491943	0.0476074	0.0104141	0	0	0	0	0	0	0.0253143	0	0.0128174	0.141235	0.161743	0.171387	0.192261	0.207764	0.339355	0.267822	0.285645	0.107117	0	0.153809	0.317139	0.902344	0.902344	0.353027	0.529297	0.0727539	0.055542	0	0	0	0	0	0.300049	0.382324	0.115967	0.180298	0.213623
ACH-000009	0.71875	0.625	0.804688	1	0.846191	0.62207	0.3479	0.444336	1	0.977051	1	0.162842	0	0.069458	0	0.083313	0.0138855	0.111084	0	0.344727	0.482666	0.79541	0.896484	0.98291	1	0.931641	0.692383	0.804688		1		0.615234	1	1	0.989746	0.966797	0.933105	0.75	0.75	1	1	1	0.9375	0.703613	0.956543	0.95459	0.846191	0.913086	0.850098
ACH-000011																		0.933105				0.95459			0.9375	0.875	0.922852	0.916504	1	1	0.982422																0.916504	0.986816
ACH-000012	0.606934	0.213501	0.13269	0.252441	0.0784302	0.105286	0	0.131592	0.5	0.466553	0.444336	0.790039	0.461426	0.897461	0.621582	0.702637	0.378418	0.0908813	0.213379	0.337891	0.162109	0.377197	0.518555	0.626953	0.915039	0.659668	0.894531	0.991211	0.827637	0.948242	0.758789	0.370361	0.947754	0.978516	0.95752	0.552734	0.657715	0.734863	0.25	0.444336	0.631348	0.789551	0.842285	0.736816	1	0.906738	0.455078	0.457275	0.958984
ACH-000013	0.538574	0.322998	0.961426	0.519043	0.666504	0.75	0	0.083313	0.611328	0.645996	0.611328	0.204346	0.34375	0.562988	0.219727	0.426025	0.219727	0.0875244	0.0841064	0.205566	0.177612	0.569336	0.342285	0.375	0.942383	0.759766	0.671875	0.70166	0.735352	0.880371	0.294189	0.645508	0.967773	1	0.742188	0.355469	0.438965			0.846191	0.82373	0.764648	0.706055	0.1875	0.464355	0.535645	0.442139	0.587402	0.991699
ACH-000014	0.161255	0.22583	0.129028	0.129028	0.125	0.290283	0.34375	0.137939	0.320068	0.350098	0.280029	0.128662	0.242432	0.5	0.242432	0.515137	0.030304	0.399902	0.0952148	0.19043	0.19043	0.28125	0.379639	0.378418	0.318604	0.362549	0.386719	0.320068	0.145142	0.243286	0.131104	0.537598	0.47168	0.622559	0.622559	0.415771	0.37085	0.166626	0.208374	0.297363	0.351318	0.297363	0.486572	0.0769043	0.260986	0.217407	0.287598	0.232178	0.384033
ACH-000015					0.996094																								1		1	1																	1
ACH-000017	0.148926	0	0	0	0	0.0625	0	0	0.0999756	0.230713	0.0999756	0.141235	0.055542	0.027771	0	0	0.055542	0.0588379	0.0769043	0.153809	0.307617	0.51123	0.494141	0.51123	0.515625	0.326416	0.575195	0.349365	0.45459	0.421631	0.350098	0.605469	0.338623	0.725586	0.698242	0.5625	0.4375	0.235352	0	0.184204	0.157837	0.184204	0.105286	0.0540466	0.268311	0.317139	0.421631	0.404053	0.705566
ACH-000018	0.228516	0	0	0.266602	0.3479				0.0416565	0.193604	0.0416565	0	0	0.272705	0.0449524	0.0786743	0.0112381	0	0.0400085	0	0.219971	0.228027	0.280029	0.560059	0.630371	0.456543	0.406738	0.541016	0.289551	0.360596	0.378418	0.360107	1	1	0.894531	0	0	0.5625	0.5625	0.222168	0.222168	0.222168	0		0	0	0.31958	0.327881	1
ACH-000019	0.734863	0.590332	0.559082	0.687988	0.264648	0.584961	0.245239	0.3396	0.856934	0.837402	0.952148	0.561523	0.0980225	0.656738	0.294189	0.401855	0.15686	0.196777	0.230713	0.558594	0.818359	0.86377	0.813477	0.847656	0.73584	0.885254	0.983398	0.983398	0.938965	0.966797	0.877441	0.63623	0.894043	1	0.882324	0.788574	0.865234	0.781738	0.854492	0.793945	0.853027	0.882324	0.706055	0.833496	1	0.850586	0.687988	0.922852	0.861816
ACH-000020									1		1	0.833496	0.970703	0.971191	0.971191	0.885742	0.971191					1			1	1	0.899902	0.818359		0.727051		0.928711	1	1	0.777832			0.789551	1	0.0416565	0.577148	0.807617	0.807617	0.75	0.0444336	0.955566	0.917969	0.960449
ACH-000021																		0				1													0			0.00345993	0.00347137
ACH-000022	1	0.856934	0	0		0.649902	0.649902	1	0.555664	0.491699	0.5	0.0875854	0	0.811035	0	0.432373	0	0	0.516602	0.350098	0.766602	0.202393	0.394775	0.920898	0.848633	0.574707	1	0.357178		0.643066			0.820801	1	0.916504	0	0							0.964355	0.605469	0.605469	0.231445	0.281982	1
ACH-000023	0.666504	0.481445	0.763672	0.736328	0.666504	0.413086	0.478271	0.434814	0.357178	0.803711	0.714355	0.548828	0.656738	0.97998	0.717285	0.788086	0.767578	0.418701	0.785156	0.891113	0.891113	0.606445	0.79834	0.991699	0.811035	0.657715	0.972168	0.890137	0.850098	0.935547	0.899902	0.918945	0.966309	0.92041	0.965332	0.751465	0.686523	1	1	0.829102	0.333252	0.80957	0.976074	0.905762	0.984863	0.94043	0.506836	0.788574	1
ACH-000024	0.279053	0.279053	0.181763	0.45459	0.577637	0.423096	0.407471	0.444336	0.941406	0.350098	0.941406	0.346191	0.45459	0.757812	0.394043	0.54541	0.727051	0.291748	0.214233	0.214233	0.25	0.125	0.373779	0.428467	0.474365	0.384521	0.399902	0.984863	0.625	0.656738	0.40625	0.688965	0.788574	0.961426	0.980469	0.3125	0.416748	0.333252	0.25	0.75	0.649902	0.649902	0.549805	0.59082	0.727051	0.428467	0.0908813	0.506348	1
ACH-000026	0.128784	0	0	0	0	0	0.055542	0.117676	0.0434875	0.192993	0.083313	0.00450516	0	0.318848	0.0617371	0	0.00617218	0.0344849	0	0	0.00584793	0.72168	0.192749	0.296387	0.305908	0.258301	0.496826	0.505859	0.579102	0.333252	0.193604	0.326416	0.94043	0.620605	0.387451	0.00704193	0.0211334	0.111084	0.142822	0.196045	0.360107	0.280029	0.137207	0.57373	0.00892639	0	0.0462952	0.318848	0.938477
ACH-000027	0.145142	0.174561			0.03125	0	0	0.105286	0.0526428	0.363525	0.131592	0.441895	0.5	1	1	1	0.5625	0	0.25	0.210571	0.947266	0.769043	0.448242	1	0.979004	0.75	1	1	1	0.703613	1	0.435547	1	1	1	0.202148	0.340332	1	1					0.783691	0.615234	0.384521	0.407471	0.669434	0.160034
ACH-000028	0.956543	0.695801	0.672363	0.333252	0.8125	0.681641	0.272705	0.5	0.736816	0.606934	0.473633	0.571289	0.458984	0.983398	0.360596	0.557617	0.237305	0.387207	0.769043	1	0.846191	0.871582	0.872559	0.910645	1	1	1	1	0.96875	1	0.96875	1	1	1	0.975586	0.689453	0.965332	1	0.888672	1	0.9375	0.9375	1	1	1	0.846191	0.906738	0.716309	0.854004
ACH-000030
ACH-000031	1	0.560059	0.3125	0.0208282	0.772949	0.0169525	0.310303	0.965332	0.953613	0.955078	1	0.0350952	0.0731812	0.634277	0.219482	0.283936	0.0853882	0	0.315674	0.407959	0.697266	0.896484	0.854004	0.966309	0.987305	0.850098	1	0.942871	0.922852	0.97168	0.942383	1	1	1	0.897461	0.938965	0.877441	1	1	1	1	1	0.935547		0.826172	0.847656	0.81543	0.875977	0.90332
ACH-000032					1	0.899902	0.899902	0.899902	1		1	1	1	1	1	1	1		0.856934	0.769043	0.922852	1			0.700195	1	0.692383	0.961426	1	0.959961	1	1	1	1	1	0.967773	0.981445	1	1					1			0.932129	0.964355	1
ACH-000035	1	0.865723			0.083313	0	0	0.0294189	0.742676	0.640137	0.542969	0.416748	0.277832	0.944336	0.138916	0.361084	0.305664	0.297363	0.0499878	0.950195	1	1	0.976074	0.976074	0.730957	0.730957	0.844238	1	1	0.630371	1		0.944336	0.462891	0.981445	0.899902	0.987305			0.98584	0.98584	0.98584	0.328613	1			0.340088	0.802734	0.919434
ACH-000037					0	0	0	0.0755005	0	0.799805	0	0							0	0	0	0.175049	0	0	0.542969	0.271484	0.916504	0		0		1	1	1	1					0	0	0	0	0	0.055542	1	0.0357056	0.216431	0.509277
ACH-000038	0.0158691	0	0.0625	0.125	0	0	0	0.0208282	0.0714111		0.0689697	0	0	0	0	0.0117645	0	0	0.0908813	0.300049	0.300049	0	0	0.177734	0	0	0.129028	0.46875	0.314209	0	0	0	0.0327759	0.557617	0.705078	0	0.0499878	0.09375	0.09375	0	0	0	0.311035	0.0178528	0	0	0	0.172363	1
ACH-000039	0.483887	0.09375	0	0	0.0908813	0	0.0322571	0.0666504		0.40918		0	0	0.0416565	0	0	0	0.0625	0	0	0.416748	0.769043	0.0128174	0.0249939	0	0.0531921	0.554199	0.797852	0.304443	0.321533	0	0.0232544	0.0571289	0.285645	0.12854	0.0116272	0.0697632	0.899902	0.799805	0.166626	0.055542	0.055542	0.055542	0.680176	0.19043	0.0952148	0.550781	0.490234	0.961914
ACH-000040	0.272705	0.0340881	0	0	0.1875	0	0.125	0.210571	0.333252	0.333252	0.208374	0.516113	0.083313	0.353027	0.142822	0.353027	0.277832	0.111084	0.318115	0.199951	0.307617	0.294678	0.0793457	0.355469	0.461426	0.23877	0.57373	0.617676	0.408203	0.484863	0.15686	0.127686	0.965332	0.95166	0.904785	0.10144	0.130493	0.0192261	0.0192261	0.600098	0.625	0.6875	0.5625	0.799805	0.235352	0.0606079	0.330322	0.253418	0.834473
ACH-000041	0	0	0.125	0.125	0.5				0	0.133301	0	1	0.652832	1	0	0	0	0				0	0	0.0172424	0	0.224976	0.75	0.875	0.689453	0.589355	1	0.166626	0.740723	1	0.259277					0	1	1	1	0.333252			0.421631	0.262451
ACH-000042	0.90918	0.54541	0.807617	1		0.4375	0.5625	1	0.375	0.666504	0.125	0.0652466	0.130493	0.217407	0.260986	0.17395	0.130493	0.111084	0.130493	0.0434875	0.130493	0.852051	1	0.962891	1	0.888672	1	0.888672	1	1	1	1	1	1	0.260986	0.833496	0.666504	1	0.941406					1	1	1	0.825195	0.163208	0.94873
ACH-000044	0.868652	0.579102	0.54834	0.45166	0.821289	0.684082	0.473633	0.736816	0.722168	0.839844	0.944336	0.95752	0.380859	0.952148	0.666504	0.761719	0.238037	0.680176	0.950195	0.850098	0.975098	0.9375	1	1	1	0.941406	0.956543	0.955566	0.956055	0.844238	0.985352	0.981934	1	0.978027	0.93457	1	1	1	0.904785	1	1	1	0.871094	1	0.966797	0.766602	0.727051	0.919922	0.969727
ACH-000045	0.424072	0.0103455	0.0466614	0.0540466	0.185669	0	0	0.0175476	0.207764	0.125854	0.256836	0.204712	0.147949	0.5	0.341797	0.538574	0.31958	0.0625	0.146606	0.0340271	0.115662	0.183228	0.333252	0.629883	0.304443	0.103271	0.30835	0.683594	0.75	0.586426	0.405518	0.669434	0.912598	0.993164	0.75	0.106812	0.14563	0.177979	0.0427246	0.171997	0.439453	0.434814	0.142822	0.34375	0.415527	0.114929	0.238037	0.326172	0.996094
ACH-000046	1	0.928711	1	1	0.733398	0.856934	0.928711	0.928711	0.799805	0.882324	0.833496	1	0.466553	0.866699	0.799805	1	1	1	1	1	1	1	1	1	0.902344	0.829102	0.970703	0.985352	1	0.970703	1	1	1	1	0.96875	0.913086	0.818359	0.925781	1	0.0714111	0.533203	0.933105	0.933105	1	1	1	0.829102	0.976074	0.9375
ACH-000047	0.116272	0.186035	0.413086	0.191528	0.0645142	0.17395	0.083313	0.166626	0.130493	0.296387	0.217407	0.0789185	0.0461426	0.507812	0.0307617	0.375	0.0615234	0.105286	0.0657959	0.131592	0.171021	0.479248	0.702148	0.595703	0.770996	0.807617	0.541504	0.459961	0.440674	0.560059	0.745605	0.595703	0.558594	1	0.666504	0.683105	0.634277	0.588379	0.470703	0.555664	0.714355	0.571289	0.392822	0.366699	0.609863	0.700195	0.3479	0.329346	0.975586
ACH-000048	0.45459	0.666504	0.928711	0.785645	0.666504					0.807617		0.510742	0.777832	1	0.861328	0.916504	0.833496	1	0.964355	0.785645	0.964355	1	0.899902	1	0.980957	1	1	1	1	0.956543	0.806641	1	0.984863	0.984863	0.94043	0.818359	0.981934	1	0.799805	0.842285	0.944336	1	1	0.888672	0.866699	0.799805	0.9375	0.98291	0.878906
ACH-000050	0.875	0.541504	0.799805	0.774414	0.958496	0.846191	0.615234	0.916504	0.526367	0.622559	0.600098	0.422363	0.725586	0.960938	0.899902	0.680176	0.803711	0.799805	0.769043	0.777832	0.814941	0.632324	0.680664	0.849121	0.882812	0.785156	0.873047	0.984863	0.945801	0.953613	0.916504	0.878906	0.866699	0.918945	0.868652	0.844727	0.792969	0.666504	0.646973	0.941406	0.888672	0.777832	0.944336	0.888672	0.947266	0.910645	0.632812	0.562988	0.902344
ACH-000051	0.956543	0.391357	1	1	1	0.0476074	0.0476074	0	1	0.5	1	0.5	1	1	0.803711	1	0.548828	1	0.25	0.75	1	1			0.444336	0.888672	0.844727	1	0	0.847656	0.583496	1	1	1	0.944336	1	1	1	1	0.651367	1	1	0.837402	0.666504			0.659668	0.761719	1
ACH-000052	0.0521851	0.0869751	0	0.287598	0.234619	0	0	0.0845337	0.208374	0.256348	0.224487	0.329346	0.286865	0.387939	0.370605	0.482422	0.121765	0	0.985352	0.94043	0.970215	0.981934	0.0588379	0.799805	0.991699	0.756348	0.921875	1	1	0.956543	0.161255	0.777832	0.978516	0.915039	0.978516	0.20459	0.125	0.463379	0.780273	1	1	1	1	1	0.175781	0.344482	0.45752	0.872559	0.977051
ACH-000053					0
ACH-000054	0.451172	0	0	0.217407	0	0.206909	0.206909	0.220947	0.625	0.416748	0.625	0.804199	0.199951	0.474609	0.25	0.466553	0.466553	0	0	0	0	0.75	0	0	0	0.193604	0.694336	0.605469	0.0384521	0.773438	0.0384521	0.166626	0.460693	0.932617	0.549316	0.605957	0.605957	0.240723	0	0	0	0	0.541504		0.325684	0.139526	0.518555	0	0.507324
ACH-000055	0.0120468	0.0120468	0.205933	0.600098	0	0.174561	0.412598	0.456055	0.217407	0.720703	0.304443	0	0.326904	0.827148	0.173096	0.615234	0.0192261	0.0249939	0	0.166626	0.0185242	0.510742	0.300049	0.672852	0.762695	0.54248	0.958496	0.729004	0.703613	0.82959	0.577148	0.67627	0.885742	0.971191	0.971191	0.1698	0.151001	0.199951	0.799805	0.850098	0.899902	0.222168	0.649902	0.764648	0.862305	0.571289	0.328857	0.265381	1
ACH-000056	1	1	0.924805	0.950195	0.567383					1		0.220337	0.799805	0.933105	0.933105	0.933105	0.866699	0.818359	0.509277	0.641602	0.622559	0.935547	0.62207	1	1	1	1	1	1	1	0.82373	1	1	1	1	1	1	1	1						0.769043	0.461426	0.447754	0.973633	1
ACH-000058	0.787109	0.25	0.272705	0.395264	0.166626	0.227295	0.0454407	0.0454407	0.117676	0.375	0.210571	0.125	0.162109	0.694336	0.657715	0.947266	0.571289	0.227295	0.844727	0.275879	0.660156	0.918945	0.431396	0.859863	0.774414	0.426514	0.582031	0.966309	0.294189	0.547363	0.558594	0.640137	1	0.919922	0.899902	0.431396	0.775391	0.577148	0.307617	0.32251	0.612793	0.78125	0.3125	0.600098	0.186035	0.20459	0.228882	0.496338	0.883301
ACH-000059	0.981934	0.140381	0.962891	1	0.142822	0.922852	0.922852	0.75	0.947266	0.966797	0.947266	0.989258	0.899902	1	1	1	0.949219	1	0.916504	0.882324	0.970703	0.988281	0.640137	0.991211	1	0.803711	0.988281	0.988281	0.90918	0.988281	0.981934	0.974121	0.988281	0.941895	1	0.94043	0.865723	0.961426	0.922852	1	0.913086	1	0.739258	1	0.853027	0.941406	0.956543	0.979004	0.983398
ACH-000060	1	0.9375	0.700195	1	0.555664	0.473633	0.333252	0.166626	1	0.685547	1	0.145142	0.550781	0.836914	0.693848	0.510254	0.734863	0.588379	0.727051	0.439453	0.539551	1	0.967773	0.967773	0.966797	0.966797	1	0.969727	1	0.935547	0.456543	0.899902	1	0.846191	0.833496	0.666504	0.94873	1	0.952148	1	0.875	0.9375	0.5625	1	1	1	1	0.947266	1
ACH-000061	0.666504	0.547852	0.526367	0.763184	0.966309	0.54541	0.34082	0.25	0.666504	0.833496	0.904785	0.97168	1	0.972168	0.861328	0.971191	0.972168	0.706055	0.904297	0.602539	0.808105	1	1	0.796387	1	0.986328	0.98584	0.943848	1	0.887207	0.700195	1	0.941895	0.970215	0.985352	0.84375	1	1	0.739258	0.959961	1	0.962891	1	0.956543	1	1	0.862793	1	1
ACH-000062	0	0	0	0	0				0.769043		0.922852	0.399902	0	0.46582	0.258545	0.471924	0.0112381					0.672363	1	1	0.882324	0.548828	0.674805	0.390137	1	0.700195	0	1				0.769043	0.307617								1	1	0.208374	0.69043	1
ACH-000063	0.363525	0	0.266602	0.413818	0.214233	0.282715	0.304443	0.181763	0.214233	0.666504	1	0.466553	0.224487	0.395752	0.204102	0.469482	0.555664		0.369629	0.0434875	0.195679	0.799805	0.234009	0.766113	0.844238	0.734375	0.75	0.731934	0.729492	0.589844	0.358887	0.869629	1	0.916504	0.600098	0.353027	0.323486	0.950195	0.199951	1	1	0.629395	0.961426	0.360107			0.354736	0.603027	1
ACH-000065	0.653809	0.387207	0.208008	0.579102	0.171875	0.0952148	0.139526	0.162842	0.264648	0.643066	0.281982	0.468018	0.270752	0.6875	0.229126	0.5	0.294678	0.212769	0.476562	0.485352	0.788574	0.58252	0.663574	0.828613	0.977051	0.595215	0.821289	0.91748	0.965332	0.875	0.842285	0.785645	0.930176	0.959961	0.914062	0.558594	0.592285	0.919922	0.836914	0.471436	0.764648	0.714355	0.54541	0.814941	0.799805	0.657227	0.480713	0.539062	0.875977
ACH-000066	1	0.0666504	0.473633	0.579102	0.530273	0.789551	0.579102	1	0.428467	1	0.942871	0.363525	0.272705	0.981934	0.818359	0.600098	0.163696	0.105286	0.0571289	0.971191	0.971191	0.94873	0.847168	1	1	0.571289	0.939941	0.959961	0.904785	0.928711	0.714355	1	0.792969	1	0.966797	0.894531	0.842285	1	0.888672	0.922852	0.922852	0.922852	0.922852	1	0.941406	0.911621	0.98291	0.973145	0.976074
ACH-000067										0.300049		0																																			0.00515366
[truncated: 873 more rows]
[truncated: 361 more columns]

## Sheet: TERT_CpG_methylation_info
Supplementary Table S5e: TERT CpG information
Regions and locations for TERT locus CpGs used in methylation estimates
	Chromosome	Position	5kb_prior	Exon_1	Remaining_gene_body	5kb_post
[truncated: 410 more rows]

## Sheet: TERT_summarized_methylation
Supplementary Table S5f: Region-level TERT ASM estimates
[truncated: 928 more rows]
