# Supplementary material for: Integrated evaluation of telomerase activation and telomere maintenance across cancer cell lines
Source: eLife. 2021 Sep 6;10:e66198. doi: 10.7554/eLife.66198 (PMC8530513; doi:10.7554/eLife.66198)
Supplement: Supplementary file 6. [file elife-66198-supp6.xlsx]

## Sheet: CGI_TERTp_differences
Supplementary Table S6a: CGI methylation vs. TERTp status
Differences in methylation of CGIs in TERTp mutant vs. wildtype contexts
CGI_ID	Median_TERTp_WT_methylation	Median_TERTp_mutant_methylation	WT_vs_mutant_difference	Difference_rank	Rank_biserial_correlation	Rank_biserial_correlation_rank	n_TERTp_WT_cell_lines	n_TERTp_mutant_cell_lines	p_value	-log10_p_value	Signed_-log10_p_value	Signed_p_value_rank	q_value	CGI_chromosome	CGI_start_position	CGI_end_position	Distance_to_telomere	Telomere_proximal	HepG2_PRC2
chr10_100227438_100227832	0.0440063	0.0813599	0.0373535	17263	0.263439	18119	397	82	0.000170912	3.76723	3.76723	18120	0.00107964	chr10	100227438	100227832	35306915	FALSE	FALSE
chr10_100992156_100992687	0.442139	0.543945	0.101807	18082	0.0609802	14037	396	81	0.387161	0.412108	0.412108	14022	0.580726	chr10	100992156	100992687	34542060	FALSE	TRUE
chr10_101089010_101090655	0.172485	0.321533	0.149048	18341	0.158809	17068	403	81	0.0240586	1.61873	1.61873	17058	0.0737381	chr10	101089010	101090655	34444092	FALSE	FALSE
chr10_101190451_101190925	0.00794983	0.00857544	0.00062561	11992	0.013998	11603	396	81	0.842877	0.0742358	0.0742358	11596	0.914638	chr10	101190451	101190925	34343822	FALSE	FALSE
chr10_101281181_101282116	0.708496	0.766602	0.0581055	17646	0.0498587	13488	405	83	0.474253	0.32399	0.32399	13507	0.658677	chr10	101281181	101282116	34252631	FALSE	FALSE
chr10_101287162_101287920	0.761719	0.711426	-0.050293	3727	-0.109179	5907	399	80	0.123155	0.909548	-0.909548	5955	0.262988	chr10	101287162	101287920	34246827	FALSE	TRUE
chr10_101290625_101291178	0.80127	0.705566	-0.0957031	2641.5	-0.300714	1777	393	83	1.65681e-05	4.78073	-4.78073	1728	0.00014398	chr10	101290625	101291178	34243569	FALSE	TRUE
chr10_101292436_101292851	0.272217	0.239014	-0.0332031	4357.5	-0.0895532	6599	399	82	0.201423	0.695892	-0.695892	6588	0.374836	chr10	101292436	101292851	34241896	FALSE	TRUE
chr10_101294443_101297263	0.302246	0.359619	0.057373	17637	0.0719357	14550	409	83	0.301376	0.520891	0.520891	14561	0.493367	chr10	101294443	101297263	34237484	FALSE	TRUE
chr10_101299997_101300859	0.294922	0.339111	0.0441895	17425.5	0.0656286	14248	402	81	0.351372	0.454233	0.454233	14224	0.545243	chr10	101299997	101300859	34233888	FALSE	TRUE
chr10_101379708_101381445	0.013916	0.0114136	-0.00250244	8135	-0.0400225	8780	407	83	0.565568	0.247515	-0.247515	8762	0.730591	chr10	101379708	101381445	34153302	FALSE	FALSE
chr10_101418868_101419589	0.0156555	0.016449	0.000793457	12254	-0.00223376	10745	404	82	0.974885	0.0110466	-0.0110466	10744	0.9868	chr10	101418868	101419589	34115158	FALSE	FALSE
chr10_101491680_101492232	0.00565338	0.00572968	7.62939e-05	11076	0.0410034	13025	403	82	0.558313	0.253122	0.253122	13028	0.724365	chr10	101491680	101492232	34042515	FALSE	FALSE
chr10_101599887_101600226	0.876953	0.838379	-0.0385742	4142	-0.227123	2963	410	83	0.001096	2.96019	-2.96019	2912	0.0054224	chr10	101599887	101600226	33934521	FALSE	TRUE
chr10_101945571_101945907	0.00917053	0.0116043	0.00243378	14147.5	0.0755201	14685	399	83	0.278412	0.555313	0.555313	14705	0.467981	chr10	101945571	101945907	33588840	FALSE	FALSE
chr10_101989127_101989533	0.00595093	0.0065918	0.000640869	12020	0.0140863	11608	383	81	0.840575	0.0754234	0.0754234	11612	0.91327	chr10	101989127	101989533	33545214	FALSE	FALSE
chr10_102046142_102046632	0.00601578	0.00668716	0.000671387	12060.5	0.0309025	12517	397	82	0.659365	0.180874	0.180874	12506	0.799034	chr10	102046142	102046632	33488115	FALSE	FALSE
chr10_102106182_102107722	0.0516052	0.0515442	-6.10352e-05	10769.5	-0.00503726	10588.5	409	83	0.942621	0.0256628	-0.0256628	10585	0.971022	chr10	102106182	102107722	33427025	FALSE	FALSE
chr10_102133021_102133557	0.0739746	0.0619202	-0.0120544	5714.5	-0.147	4720	408	83	0.0346931	1.45976	-1.45976	4683	0.0994658	chr10	102133021	102133557	33401190	FALSE	FALSE
chr10_1021641_1022509	0.878906	0.878906	0	10903.5	-0.0287215	9342	397	82	0.682348	0.165994	-0.165994	9344	0.814868	chr10	1021641	1022509	1021641	TRUE	TRUE
chr10_102241980_102242559	0.0379639	0.0459595	0.00799561	15715	0.104044	15795	395	82	0.138054	0.859951	0.859951	15787	0.286348	chr10	102241980	102242559	33292188	FALSE	FALSE
chr10_102279162_102279730	0.880371	0.803711	-0.0766602	3041.5	-0.107822	5974	391	82	0.124659	0.904277	-0.904277	5973	0.265319	chr10	102279162	102279730	33255017	FALSE	FALSE
chr10_102289150_102289742	0.0112915	0.00927734	-0.00201416	8440	-0.022154	9652	409	82	0.751678	0.123968	-0.123968	9644	0.862643	chr10	102289150	102289742	33245005	FALSE	FALSE
chr10_102321832_102322395	0.510254	0.428711	-0.081543	2924.5	-0.145893	4752	385	83	0.0370341	1.4314	-1.4314	4731	0.104878	chr10	102321832	102322395	33212352	FALSE	FALSE
chr10_102414425_102416315	0.221313	0.18396	-0.0373535	4184	-0.0737291	7210	410	83	0.28938	0.538532	-0.538532	7180	0.480667	chr10	102414425	102416315	33118432	FALSE	TRUE
chr10_102419147_102419668	0.866211	0.687012	-0.179199	1320.5	-0.345918	1164	392	80	1.07012e-06	5.97057	-5.97057	1198	1.36207e-05	chr10	102419147	102419668	33115079	FALSE	TRUE
chr10_102430697_102431119	0.0933838	0.0736694	-0.0197144	5029.5	-0.148942	4673	389	81	0.0348845	1.45737	-1.45737	4688	0.0998979	chr10	102430697	102431119	33103628	FALSE	FALSE
chr10_102440600_102441011	0.0940552	0.0572205	-0.0368347	4209	-0.193419	3685	382	79	0.00678551	2.16842	-2.16842	3739	0.0254725	chr10	102440600	102441011	33093736	FALSE	TRUE
chr10_102469806_102470341	0.111084	0.0627441	-0.0483398	3785	-0.207162	3379	394	82	0.00315055	2.50161	-2.50161	3355	0.0133429	chr10	102469806	102470341	33064406	FALSE	TRUE
chr10_102475276_102475579	0.68457	0.71875	0.0341797	17166	-0.00155925	10774	370	78	0.983109	0.00739828	-0.00739828	10776	0.991135	chr10	102475276	102475579	33059168	FALSE	FALSE
chr10_102484200_102484476	0.445312	0.354004	-0.0913086	2732	-0.228024	2948	369	78	0.00154974	2.80974	-2.80974	3042	0.00729181	chr10	102484200	102484476	33050271	FALSE	TRUE
chr10_102489343_102491011	0.0922852	0.0977783	0.00549316	15322	0.0034327	11037	405	82	0.961224	0.0171754	0.0171754	11040	0.980014	chr10	102489343	102491011	33043736	FALSE	FALSE
chr10_102495116_102495613	0.572266	0.553223	-0.019043	5088.5	-0.0875205	6665	405	83	0.208963	0.67993	-0.67993	6638	0.385158	chr10	102495116	102495613	33039134	FALSE	TRUE
chr10_102497154_102497675	0.592773	0.325684	-0.26709	499.5	-0.389873	689	395	80	3.76317e-08	7.42445	-7.42445	720	8.03953e-07	chr10	102497154	102497675	33037072	FALSE	TRUE
chr10_102498738_102499643	0.163696	0.11261	-0.0510864	3710	-0.117214	5619	399	82	0.0944779	1.02467	-1.02467	5608	0.216743	chr10	102498738	102499643	33035104	FALSE	TRUE
chr10_102501700_102502232	0.388184	0.206299	-0.181885	1280	-0.29599	1843	402	82	2.37737e-05	4.6239	-4.6239	1810	0.000196568	chr10	102501700	102502232	33032515	FALSE	TRUE
chr10_102503913_102506146	0.14978	0.0803833	-0.069397	3237.5	-0.328328	1383	410	83	2.36407e-06	5.62634	-5.62634	1331	2.70246e-05	chr10	102503913	102506146	33028601	FALSE	TRUE
chr10_102507482_102509646	0.328125	0.214233	-0.113892	2277.5	-0.276663	2153	406	83	7.08327e-05	4.14977	-4.14977	2100	0.000503269	chr10	102507482	102509646	33025101	FALSE	TRUE
chr10_102586125_102588109	0.0974121	0.178955	0.081543	17914.5	0.127446	16451	410	83	0.0669953	1.17396	1.17396	16477	0.167207	chr10	102586125	102588109	32946638	FALSE	FALSE
chr10_102672367_102673159	0.00896454	0.00970459	0.000740051	12164.5	0.0890097	15247	410	83	0.200821	0.697192	0.697192	15262	0.374088	chr10	102672367	102673159	32861588	FALSE	FALSE
chr10_102729299_102729710	0.0262604	0.0910645	0.0648193	17739.5	0.288679	18253	399	82	3.80024e-05	4.42019	4.42019	18253	0.000293856	chr10	102729299	102729710	32805037	FALSE	FALSE
chr10_102746533_102747501	0.00750351	0.011261	0.00375748	14839	0.0855497	15106	398	82	0.222055	0.653539	0.653539	15108	0.401702	chr10	102746533	102747501	32787246	FALSE	FALSE
chr10_102756834_102759798	0.0274353	0.0257874	-0.00164795	8737	-0.105185	6050	408	83	0.130773	0.883481	-0.883481	6022	0.275039	chr10	102756834	102759798	32774949	FALSE	FALSE
chr10_102778604_102778922	0.293457	0.276855	-0.0166016	5285	-0.127334	5287	401	82	0.0691496	1.16021	-1.16021	5282	0.171035	chr10	102778604	102778922	32755825	FALSE	FALSE
chr10_102790820_102791049	0.00595093	0.00780487	0.00185394	13662.5	0.0342377	12687	387	80	0.627103	0.202661	0.202661	12685	0.777334	chr10	102790820	102791049	32743698	FALSE	FALSE
chr10_102792042_102792266	0.00999451	0.00645828	-0.00353622	7607	-0.170212	4191	389	80	0.0162336	1.78959	-1.78959	4225	0.0529514	chr10	102792042	102792266	32742481	FALSE	FALSE
chr10_102807774_102808271	0.762695	0.817871	0.0551758	17602.5	0.0921061	15357	389	82	0.189846	0.721599	0.721599	15345	0.359579	chr10	102807774	102808271	32726476	FALSE	TRUE
chr10_102809887_102810282	0.0469055	0.0603943	0.0134888	16241.5	0.0908893	15313	402	80	0.199042	0.701055	0.701055	15271	0.371439	chr10	102809887	102810282	32724465	FALSE	FALSE
chr10_102820488_102822874	0.0569763	0.264893	0.207886	18491	0.534196	18728	408	83	1.6438e-14	13.7842	13.7842	18728	6.28728e-12	chr10	102820488	102822874	32711873	FALSE	FALSE
chr10_102825929_102827693	0.030899	0.034668	0.00376892	14841.5	0.0199429	11926	409	83	0.774718	0.110856	0.110856	11931	0.876404	chr10	102825929	102827693	32707054	FALSE	FALSE
chr10_102882977_102883551	0.161743	0.176392	0.0146484	16337	0.0292204	12418	388	80	0.680863	0.16694	0.16694	12400	0.814082	chr10	102882977	102883551	32651196	FALSE	TRUE
chr10_102891010_102891794	0.381836	0.23938	-0.142456	1813	-0.140012	4930	409	83	0.0442271	1.35431	-1.35431	4892	0.120547	chr10	102891010	102891794	32642953	FALSE	FALSE
chr10_102893660_102895059	0.751465	0.591797	-0.159668	1557.5	-0.265876	2326	399	83	0.000137402	3.86201	-3.86201	2289	0.000892328	chr10	102893660	102895059	32639688	FALSE	TRUE
chr10_102899822_102900263	0.862793	0.737793	-0.125	2102.5	-0.254914	2482	399	83	0.000256594	3.59075	-3.59075	2446	0.00154782	chr10	102899822	102900263	32634484	FALSE	FALSE
chr10_102905714_102906693	0.589844	0.40918	-0.180664	1299.5	-0.254247	2490	400	83	0.000265522	3.5759	-3.5759	2456	0.00159347	chr10	102905714	102906693	32628054	FALSE	TRUE
chr10_102975969_102978096	0.402344	0.373047	-0.0292969	4522	-0.0584274	7870	402	82	0.40435	0.393242	-0.393242	7866	0.5976	chr10	102975969	102978096	32556651	FALSE	TRUE
chr10_102982302_102983600	0.482178	0.383301	-0.098877	2579.5	-0.180163	3963	409	83	0.00962528	2.01659	-2.01659	3919	0.034194	chr10	102982302	102983600	32551147	FALSE	TRUE
chr10_102984182_102990063	0.420898	0.334717	-0.0861816	2827.5	-0.238437	2764	410	83	0.000609685	3.21489	-3.21489	2700	0.00328721	chr10	102984182	102990063	32544684	FALSE	TRUE
chr10_102996034_102996646	0.763672	0.692383	-0.0712891	3182	-0.191629	3718.5	401	83	0.00597522	2.22365	-2.22365	3674	0.0229128	chr10	102996034	102996646	32538101	FALSE	TRUE
chr10_103043990_103044480	0.758301	0.594238	-0.164062	1497	-0.211774	3277	405	82	0.00248225	2.60515	-2.60515	3237	0.010923	chr10	103043990	103044480	32490267	FALSE	TRUE
chr10_103051128_103052162	0.172607	0.146118	-0.0264893	4638.5	-0.217349	3169	400	83	0.00182388	2.739	-2.739	3118	0.00837347	chr10	103051128	103052162	32482585	FALSE	FALSE
chr10_103113523_103114414	0.00583267	0.00622559	0.000392914	11590.5	-0.0467861	8454	385	79	0.507359	0.294684	-0.294684	8467	0.684345	chr10	103113523	103114414	32420333	FALSE	FALSE
chr10_103329326_103329535	0.142822	0.137451	-0.00537109	6943	-0.0185346	9840	385	81	0.793263	0.100583	-0.100583	9847	0.887371	chr10	103329326	103329535	32205212	FALSE	FALSE
chr10_103329852_103330311	0.0396118	0.0411987	0.00158691	13386.5	0.0483426	13419	402	83	0.488018	0.311564	0.311564	13429	0.669609	chr10	103329852	103330311	32204436	FALSE	FALSE
chr10_103347679_103348215	0.0101776	0.0146408	0.0044632	15064	0.0792771	14828	401	81	0.259475	0.585905	0.585905	14821	0.446166	chr10	103347679	103348215	32186532	FALSE	FALSE
chr10_1033790_1034615	0.0145798	0.0126038	-0.00197601	8464	-0.0636369	7652	408	83	0.360703	0.44285	-0.44285	7633	0.554172	chr10	1033790	1034615	1033790	TRUE	FALSE
chr10_103454126_103454478	0.171997	0.159668	-0.0123291	5690	-0.0488432	8342	389	81	0.48924	0.310478	-0.310478	8355	0.670793	chr10	103454126	103454478	32080269	FALSE	FALSE
chr10_103535636_103536505	0.230591	0.191772	-0.0388184	4131.5	-0.180905	3947	398	82	0.00986416	2.00594	-2.00594	3931	0.0349168	chr10	103535636	103536505	31998242	FALSE	FALSE
chr10_103538815_103539988	0.355713	0.532227	0.176514	18431	0.154411	16993	405	82	0.0273928	1.56236	1.56236	16997	0.0821558	chr10	103538815	103539988	31994759	FALSE	FALSE
chr10_103542711_103543290	0.0574951	0.0490417	-0.00845337	6246.5	-0.0346254	9041	392	82	0.622067	0.206163	-0.206163	9039	0.773836	chr10	103542711	103543290	31991457	FALSE	FALSE
chr10_103577394_103578256	0.0342102	0.0279083	-0.00630188	6718.5	-0.191399	3721	404	83	0.0059999	2.22186	-2.22186	3678	0.0229839	chr10	103577394	103578256	31956491	FALSE	FALSE
chr10_103603166_103603642	0.501465	0.602051	0.100586	18072	0.0575224	13881	390	83	0.410564	0.386619	0.386619	13883	0.603037	chr10	103603166	103603642	31931105	FALSE	FALSE
chr10_103815502_103816105	0.010025	0.00999451	-3.05176e-05	10820.5	0.00230904	10980	401	81	0.97417	0.0113653	0.0113653	10979	0.986692	chr10	103815502	103816105	31718642	FALSE	FALSE
chr10_103824894_103825778	0.00843048	0.0122223	0.00379181	14846.5	0.103286	15773	409	82	0.139723	0.854731	0.854731	15773	0.288756	chr10	103824894	103825778	31708969	FALSE	FALSE
chr10_103879633_103880628	0.00574493	0.00641251	0.000667572	12053	-0.0140689	10119	397	82	0.841191	0.0751052	-0.0751052	10121	0.913663	chr10	103879633	103880628	31654119	FALSE	FALSE
chr10_103892659_103893590	0.00898743	0.0102081	0.0012207	12898	0.0431217	13144	403	82	0.538048	0.269179	0.269179	13142	0.70927	chr10	103892659	103893590	31641157	FALSE	FALSE
chr10_103911696_103912546	0.00226402	0.0026474	0.000383377	11581	0.0495382	13472	397	81	0.481501	0.317403	0.317403	13461	0.664078	chr10	103911696	103912546	31622201	FALSE	FALSE
chr10_103985852_103986246	0.0707397	0.0839844	0.0132446	16230.5	-0.0245455	9532	385	80	0.729874	0.136752	-0.136752	9553	0.84753	chr10	103985852	103986246	31548501	FALSE	FALSE
chr10_103990213_103991829	0.09375	0.118469	0.0247192	16856	0.140363	16734	410	82	0.0447255	1.34944	1.34944	16744	0.121454	chr10	103990213	103991829	31542918	FALSE	FALSE
chr10_104000254_104001741	0.337158	0.348145	0.0109863	16038.5	-0.00808147	10407	407	83	0.907907	0.0419586	-0.0419586	10404	0.953025	chr10	104000254	104001741	31533006	FALSE	FALSE
chr10_104153729_104155557	0.0296631	0.0268402	-0.00282288	7964.5	-0.036938	8928	410	83	0.595703	0.22497	-0.22497	8914	0.753818	chr10	104153729	104155557	31379190	FALSE	FALSE
chr10_104159096_104159536	0.0258331	0.0249176	-0.000915527	9518.5	0.00536917	11154	389	79	0.940324	0.0267225	0.0267225	11148	0.970167	chr10	104159096	104159536	31375211	FALSE	FALSE
chr10_104168558_104169153	0.0371399	0.0601501	0.0230103	16772.5	0.0499052	13491	325	73	0.50394	0.297621	0.297621	13339	0.681917	chr10	104168558	104169153	31365594	FALSE	FALSE
chr10_104170168_104170872	0.664062	0.31543	-0.348633	170.5	-0.392337	665	402	82	2.11991e-08	7.67368	-7.67368	652	5.02132e-07	chr10	104170168	104170872	31363875	FALSE	TRUE
chr10_104178528_104179548	0.0545349	0.0422974	-0.0122375	5695	-0.123299	5408	390	81	0.0804906	1.09425	-1.09425	5427	0.19194	chr10	104178528	104179548	31355199	FALSE	FALSE
chr10_104180478_104182042	0.0203247	0.0237732	0.00344849	14744	0.11675	16162	410	83	0.0933584	1.02985	1.02985	16184	0.214885	chr10	104180478	104182042	31352705	FALSE	FALSE
chr10_104210095_104210985	0.00619888	0.00649643	0.000297546	11424	0.0640079	14173	403	83	0.358342	0.445702	0.445702	14183	0.551812	chr10	104210095	104210985	31323762	FALSE	FALSE
chr10_104220983_104221287	0.00386429	0.00418091	0.00031662	11454.5	0.0836763	15042	396	81	0.23373	0.631286	0.631286	15027	0.416468	chr10	104220983	104221287	31313460	FALSE	FALSE
chr10_104262224_104262524	0.00159454	0.00204468	0.000450134	11699.5	0.0779167	14773	390	80	0.258651	0.587285	0.587285	14827	0.445086	chr10	104262224	104262524	31272223	FALSE	FALSE
chr10_104401821_104404968	0.0213165	0.0229492	0.00163269	13442	0.00813988	11293	410	83	0.907182	0.0423056	0.0423056	11294	0.952477	chr10	104401821	104404968	31129779	FALSE	FALSE
chr10_104473399_104474711	0.00782776	0.00765991	-0.000167847	10597.5	-0.0256024	9491	400	83	0.713604	0.146543	-0.146543	9483	0.836048	chr10	104473399	104474711	31060036	FALSE	FALSE
chr10_104677315_104679312	0.171875	0.177856	0.00598145	15414	0.0022921	10979	410	83	0.974051	0.0114183	0.0114183	10981	0.986692	chr10	104677315	104679312	30855435	FALSE	FALSE
chr10_104952242_104953232	0.0205994	0.0185547	-0.00204468	8419.5	-0.153188	4557	410	83	0.0276818	1.55781	-1.55781	4519	0.0827584	chr10	104952242	104953232	30581515	FALSE	FALSE
chr10_105036628_105038084	0.396973	0.43457	0.0375977	17269.5	0.0530659	13657	403	83	0.446475	0.350203	0.350203	13672	0.634829	chr10	105036628	105038084	30496663	FALSE	TRUE
chr10_105110265_105111008	0.00924683	0.0106659	0.00141907	13153.5	0.013312	11566	404	82	0.84946	0.0708569	0.0708569	11562	0.918325	chr10	105110265	105111008	30423739	FALSE	FALSE
chr10_105128002_105128463	0.0125351	0.0104523	-0.00208282	8393	-0.0523294	8154	388	79	0.461802	0.335544	-0.335544	8189	0.648357	chr10	105128002	105128463	30406284	FALSE	FALSE
chr10_105155820_105156484	0.0107117	0.0108414	0.0001297	11157.5	-0.00271972	10714	404	81	0.969491	0.0134562	-0.0134562	10714	0.984822	chr10	105155820	105156484	30378263	FALSE	FALSE
chr10_105211950_105212306	0.129761	0.234741	0.10498	18102.5	0.0866704	15163	394	81	0.219139	0.65928	0.65928	15126	0.397925	chr10	105211950	105212306	30322441	FALSE	FALSE
chr10_105217966_105218287	0.906738	0.84082	-0.065918	3327	-0.220034	3103	361	74	0.00283496	2.54745	-2.54745	3307	0.0121993	chr10	105217966	105218287	30316460	FALSE	FALSE
chr10_105253191_105254428	0.138428	0.129272	-0.00915527	6113	-0.0268722	9423	408	83	0.699703	0.155086	-0.155086	9418	0.827147	chr10	105253191	105254428	30280319	FALSE	TRUE
chr10_105315007_105315244	0.112183	0.0848389	-0.0273438	4603	-0.23183	2879	401	83	0.000881161	3.05494	-3.05494	2835	0.00449971	chr10	105315007	105315244	30219503	FALSE	FALSE
chr10_105344173_105345039	0.928711	0.888184	-0.0405273	4065.5	-0.235572	2817	400	83	0.000727623	3.13809	-3.13809	2770	0.00381675	chr10	105344173	105345039	30189708	FALSE	TRUE
chr10_105420685_105421076	0.440186	0.123901	-0.316406	271.5	-0.317375	1529	393	81	6.80444e-06	5.16721	-5.16721	1542	6.65386e-05	chr10	105420685	105421076	30113671	FALSE	FALSE
chr10_105452338_105453230	0.364746	0.384033	0.0192871	16615.5	0.0549755	13749	405	83	0.430079	0.366451	0.366451	13768	0.620799	chr10	105452338	105453230	30081517	FALSE	FALSE
chr10_105614511_105615456	0.0110474	0.00992584	-0.00112152	9254	-0.0254084	9498	396	81	0.718652	0.143481	-0.143481	9503	0.839915	chr10	105614511	105615456	29919291	FALSE	FALSE
chr10_105677555_105678040	0.00437164	0.00488281	0.000511169	11827	0.0386804	12923	390	82	0.576783	0.238988	0.238988	12949	0.73995	chr10	105677555	105678040	29856707	FALSE	FALSE
chr10_105726687_105727255	0.00344849	0.00336647	-8.2016e-05	10734	-0.0284325	9357	396	81	0.684582	0.164575	-0.164575	9355	0.816651	chr10	105726687	105727255	29807492	FALSE	FALSE
chr10_105991899_105992248	0.00289917	0.001544	-0.00135517	9019	-0.105112	6054	399	83	0.125071	0.902844	-0.902844	5975	0.266045	chr10	105991899	105992248	29542499	FALSE	FALSE
chr10_106014667_106015087	0.010704	0.0136719	0.00296783	14515.5	0.0616716	14071	403	82	0.378587	0.421835	0.421835	14072	0.57215	chr10	106014667	106015087	29519660	FALSE	FALSE
chr10_106028542_106029047	0.00779343	0.0831299	0.0753174	17868	0.501952	18714	397	80	1.24618e-12	11.9044	11.9044	18712	1.7169e-10	chr10	106028542	106029047	29505700	FALSE	FALSE
chr10_106097595_106098556	0.0131378	0.0121078	-0.00102997	9351.5	0.00476419	11117	407	82	0.946045	0.0240881	0.0240881	11117	0.972596	chr10	106097595	106098556	29436191	FALSE	FALSE
chr10_106399567_106402812	0.494629	0.183838	-0.310791	296	-0.348718	1126	408	83	5.42735e-07	6.26541	-6.26541	1081	7.67447e-06	chr10	106399567	106402812	29131935	FALSE	TRUE
chr10_108923780_108924805	0.537109	0.120361	-0.416748	58	-0.401831	603	401	82	9.67902e-09	8.01417	-8.01417	592	2.54342e-07	chr10	108923780	108924805	26609942	FALSE	TRUE
chr10_1094337_1095594	0.0133591	0.0123215	-0.0010376	9341.5	0.00696444	11242	410	83	0.920586	0.0359359	0.0359359	11243	0.960356	chr10	1094337	1095594	1094337	TRUE	FALSE
chr10_109674196_109674964	0.501465	0.189941	-0.311523	294	-0.32307	1453	405	83	3.49998e-06	5.45593	-5.45593	1397	3.80589e-05	chr10	109674196	109674964	25859783	FALSE	TRUE
chr10_1102144_1103341	0.00754929	0.00936127	0.00181198	13614	0.145197	16836	405	82	0.0379553	1.42073	1.42073	16837	0.106937	chr10	1102144	1103341	1102144	TRUE	FALSE
chr10_110225927_110226465	0.552246	0.208008	-0.344238	188.5	-0.335835	1288	390	82	1.73125e-06	5.76164	-5.76164	1270	2.06735e-05	chr10	110225927	110226465	25308282	FALSE	TRUE
chr10_11059442_11060524	0.108398	0.154297	0.0458984	17456	0.109696	15967	404	82	0.117203	0.931061	0.931061	15971	0.254069	chr10	11059442	11060524	11059442	FALSE	TRUE
chr10_110671724_110672326	0.343506	0.175537	-0.167969	1450.5	-0.265616	2334	401	82	0.000149678	3.82484	-3.82484	2314	0.00096139	chr10	110671724	110672326	24862421	FALSE	FALSE
chr10_111216604_111217083	0.581055	0.241211	-0.339844	199.5	-0.324769	1433	393	82	3.69166e-06	5.43278	-5.43278	1414	3.96145e-05	chr10	111216604	111217083	24317664	FALSE	TRUE
chr10_111682775_111683483	0.00990295	0.0104904	0.000587463	11933.5	0.0155993	11682	406	81	0.824791	0.0836561	0.0836561	11680	0.903852	chr10	111682775	111683483	23851264	FALSE	FALSE
chr10_111767087_111768355	0.0311279	0.0289917	-0.00213623	8357.5	-0.0893525	6607	406	83	0.19949	0.700079	-0.700079	6576	0.37209	chr10	111767087	111768355	23766392	FALSE	FALSE
chr10_111967428_111970723	0.0341797	0.032959	-0.0012207	9150.5	-0.0575375	7907	410	83	0.408397	0.388918	-0.388918	7888	0.601203	chr10	111967428	111970723	23564024	FALSE	FALSE
chr10_111985563_111986204	0.0114746	0.011261	-0.000213623	10507	-0.0382774	8859	402	80	0.588783	0.230045	-0.230045	8875	0.748634	chr10	111985563	111986204	23548543	FALSE	FALSE
chr10_112064137_112064859	0.0198364	0.019928	9.15527e-05	11104	-0.0258434	9480	400	83	0.711008	0.148125	-0.148125	9473	0.834364	chr10	112064137	112064859	23469888	FALSE	FALSE
chr10_11207178_11207980	0.41748	0.0509338	-0.366455	121.5	-0.381594	766	399	82	5.1798e-08	7.28569	-7.28569	759	1.05259e-06	chr10	11207178	11207980	11207178	FALSE	TRUE
chr10_112257163_112258684	0.0131149	0.00948334	-0.00363159	7577	-0.134975	5073	409	83	0.0524353	1.28038	-1.28038	5043	0.137981	chr10	112257163	112258684	23276063	FALSE	FALSE
chr10_112289947_112290305	0.0487366	0.0949097	0.0461731	17458	0.108872	15939	397	81	0.122425	0.91213	0.91213	15923	0.261814	chr10	112289947	112290305	23244442	FALSE	TRUE
chr10_112327072_112327870	0.0135498	0.0133667	-0.000183105	10559	0.00837607	11300	397	83	0.904732	0.0434801	0.0434801	11303	0.950854	chr10	112327072	112327870	23206877	FALSE	FALSE
chr10_112402953_112404328	0.138184	0.185059	0.046875	17473	0.131748	16564	408	81	0.0609832	1.21479	1.21479	16552	0.155284	chr10	112402953	112404328	23130419	FALSE	TRUE
chr10_112431835_112432426	0.036499	0.0192566	-0.0172424	5216.5	-0.252752	2519	401	82	0.0003084	3.51089	-3.51089	2502	0.00181248	chr10	112431835	112432426	23102321	FALSE	FALSE
chr10_112631414_112632476	0.0101776	0.0106735	0.000495911	11809.5	-0.0174194	9916	406	83	0.802725	0.0954334	-0.0954334	9907	0.89215	chr10	112631414	112632476	22902271	FALSE	FALSE
chr10_112678307_112679894	0.0142822	0.0130157	-0.00126648	9105	-0.0548665	8040	408	83	0.430659	0.365866	-0.365866	8017	0.621205	chr10	112678307	112679894	22854853	FALSE	FALSE
chr10_112835990_112839303	0.342285	0.333008	-0.00927734	6088	-0.0376139	8894	410	83	0.588988	0.229894	-0.229894	8877	0.748736	chr10	112835990	112839303	22695444	FALSE	TRUE
chr10_11386302_11386875	0.758789	0.699219	-0.0595703	3492	-0.163794	4324	390	83	0.0190773	1.71948	-1.71948	4295	0.0607569	chr10	11386302	11386875	11386302	FALSE	TRUE
chr10_113943283_113943657	0.00790405	0.00836945	0.000465393	11722	0.0741988	14643	396	81	0.292192	0.534332	0.534332	14621	0.483701	chr10	113943283	113943657	21591090	FALSE	FALSE
chr10_114206604_114207320	0.00489426	0.00488281	-1.14441e-05	10851.5	0.0400416	12985	405	83	0.565441	0.247613	0.247613	12996	0.730527	chr10	114206604	114207320	21327427	FALSE	FALSE
chr10_114712115_114712544	0.0328369	0.0284424	-0.00439453	7271.5	-0.0751407	7160	390	82	0.284724	0.545576	-0.545576	7158	0.474946	chr10	114712115	114712544	20822203	FALSE	FALSE
chr10_115439007_115440196	0.0231018	0.0282898	0.00518799	15249	0.0998796	15645	405	82	0.153615	0.813567	0.813567	15651	0.309344	chr10	115439007	115440196	20094551	FALSE	FALSE
chr10_115614373_115615056	0.0187073	0.0212097	0.00250244	14234	0.0610087	14039	408	83	0.380827	0.419272	0.419272	14058	0.574491	chr10	115614373	115615056	19919691	FALSE	FALSE
chr10_115803358_115805468	0.31543	0.386963	0.0715332	17826	0.116397	16155	404	82	0.0964348	1.01577	1.01577	16164	0.220369	chr10	115803358	115805468	19729279	FALSE	TRUE
chr10_115933379_115934262	0.0170746	0.0188751	0.00180054	13605	0.059289	13950	405	83	0.394683	0.403752	0.403752	13970	0.587913	chr10	115933379	115934262	19600485	FALSE	FALSE
chr10_115999008_115999603	0.0795288	0.335205	0.255615	18566.5	0.340696	18454	389	81	1.39234e-06	5.85625	5.85625	18447	1.71286e-05	chr10	115999008	115999603	19535144	FALSE	TRUE
chr10_116163391_116164599	0.0488586	0.0511475	0.00228882	14040.5	-0.0767962	7080	409	83	0.269877	0.568834	-0.568834	7060	0.457719	chr10	116163391	116164599	19370148	FALSE	TRUE
chr10_116527524_116528474	0.0172119	0.024704	0.00749207	15646.5	0.119353	16222	399	82	0.0885813	1.05266	1.05266	16225	0.206502	chr10	116527524	116528474	19006273	FALSE	TRUE
chr10_11652834_11653962	0.00898743	0.0108719	0.00188446	13681	0.174967	17295	404	83	0.0120142	1.92031	1.92031	17318	0.0412342	chr10	11652834	11653962	11652834	FALSE	FALSE
chr10_116581522_116582434	0.0207062	0.0204773	-0.000228882	10478	0.040801	13012	405	82	0.560153	0.251693	0.251693	13021	0.725936	chr10	116581522	116582434	18952313	FALSE	FALSE
chr10_116852261_116854094	0.0493774	0.0377197	-0.0116577	5771.5	-0.13963	4945	407	82	0.0459882	1.33735	-1.33735	4926	0.12428	chr10	116852261	116854094	18680653	FALSE	TRUE
chr10_11784407_11784937	0.278564	0.209229	-0.0693359	3242	-0.0500463	8277	390	83	0.474056	0.32417	-0.32417	8259	0.658603	chr10	11784407	11784937	11784407	FALSE	FALSE
chr10_118030732_118034230	0.375488	0.250488	-0.125	2102.5	-0.23156	2889	410	83	0.000873411	3.05878	-3.05878	2831	0.00446744	chr10	118030732	118034230	17500517	FALSE	TRUE
chr10_118368579_118369424	0.367676	0.440186	0.0725098	17834	0.11232	16043	409	82	0.108318	0.9653	0.9653	16053	0.239859	chr10	118368579	118369424	17165323	FALSE	TRUE
chr10_118387017_118387476	0.166748	0.122986	-0.0437622	3946	-0.143952	4800	393	82	0.0402568	1.39516	-1.39516	4807	0.111891	chr10	118387017	118387476	17147271	FALSE	TRUE
chr10_118500868_118502706	0.0930786	0.0703125	-0.0227661	4853.5	-0.198899	3562	407	83	0.00427541	2.36902	-2.36902	3505	0.0172415	chr10	118500868	118502706	17032041	FALSE	FALSE
chr10_118608599_118609377	0.0267181	0.0417786	0.0150604	16356	0.104416	15804	402	81	0.138071	0.859898	0.859898	15786	0.286351	chr10	118608599	118609377	16925370	FALSE	FALSE
chr10_11865125_11865984	0.0111618	0.0111618	0	10903.5	-0.0423611	8666	407	83	0.543066	0.265148	-0.265148	8649	0.712699	chr10	11865125	11865984	11865125	FALSE	FALSE
chr10_118764228_118765146	0.0136032	0.0156555	0.00205231	13843	0.0803803	14889	408	83	0.248204	0.605192	0.605192	14916	0.433815	chr10	118764228	118765146	16769601	FALSE	FALSE
chr10_118885565_118885884	0.691895	0.583008	-0.108887	2374	-0.183951	3892	400	81	0.0090064	2.04545	-2.04545	3892	0.0322831	chr10	118885565	118885884	16648863	FALSE	TRUE
chr10_118893527_118894432	0.669434	0.776855	0.107422	18119	0.0919254	15347	396	82	0.190025	0.721189	0.721189	15344	0.359845	chr10	118893527	118894432	16640315	FALSE	TRUE
chr10_118895963_118898037	0.290527	0.232178	-0.0583496	3521.5	-0.11146	5826	410	83	0.109178	0.961864	-0.961864	5790	0.241108	chr10	118895963	118898037	16636710	FALSE	TRUE
chr10_118899247_118900329	0.852539	0.838867	-0.0136719	5541	-0.0232294	9599	403	83	0.73912	0.131285	-0.131285	9587	0.854033	chr10	118899247	118900329	16634418	FALSE	TRUE
chr10_118922351_118923520	0.308105	0.424805	0.116699	18183.5	0.0844558	15070	402	82	0.227992	0.64208	0.64208	15063	0.408891	chr10	118922351	118923520	16611227	FALSE	TRUE
chr10_118927021_118928132	0.240723	0.249268	0.00854492	15781	0.078091	14780	404	82	0.264792	0.577095	0.577095	14784	0.452082	chr10	118927021	118928132	16606615	FALSE	TRUE
chr10_118934734_118935180	0.0232544	0.0476379	0.0243835	16837	0.224212	17818	376	79	0.00162046	2.79036	2.79036	17789	0.00757508	chr10	118934734	118935180	16599567	FALSE	FALSE
chr10_118976049_118976706	0.0604858	0.0645752	0.00408936	14943.5	-0.00534365	10567	402	81	0.939832	0.0269497	-0.0269497	10567	0.970069	chr10	118976049	118976706	16558041	FALSE	FALSE
chr10_119000435_119001530	0.37207	0.275391	-0.0966797	2621	-0.154373	4529	401	83	0.0267891	1.57204	-1.57204	4499	0.0806556	chr10	119000435	119001530	16533217	FALSE	TRUE
chr10_11911554_11912432	0.93457	0.886719	-0.0478516	3804.5	-0.202902	3466	392	80	0.0042192	2.37477	-2.37477	3497	0.0170589	chr10	11911554	11912432	11911554	FALSE	FALSE
chr10_119133803_119135632	0.0127792	0.0158997	0.00312042	14583	0.077945	14775	409	83	0.262775	0.580416	0.580416	14801	0.449867	chr10	119133803	119135632	16399115	FALSE	FALSE
chr10_119293917_119297675	0.435547	0.370117	-0.0654297	3342.5	-0.115192	5692	410	83	0.0978134	1.0096	-1.0096	5644	0.222758	chr10	119293917	119297675	16237072	FALSE	TRUE
chr10_119301321_119305368	0.419922	0.204468	-0.215454	919	-0.34626	1158	407	83	6.55247e-07	6.18359	-6.18359	1119	8.96765e-06	chr10	119301321	119305368	16229379	FALSE	TRUE
chr10_119311204_119312104	0.397461	0.381348	-0.0161133	5323	-0.0772779	7056	386	82	0.271706	0.5659	-0.5659	7070	0.45984	chr10	119311204	119312104	16222643	FALSE	TRUE
chr10_119312766_119313563	0.438965	0.337891	-0.101074	2536.5	-0.169124	4215	402	83	0.015235	1.81716	-1.81716	4182	0.0502717	chr10	119312766	119313563	16221184	FALSE	TRUE
chr10_11936169_11937060	0.84082	0.812012	-0.0288086	4540	-0.108165	5962	404	83	0.120526	0.91892	-0.91892	5918	0.259069	chr10	11936169	11937060	11936169	FALSE	TRUE
chr10_119494493_119494991	0.859375	0.716797	-0.142578	1810	-0.253734	2500	395	80	0.000343078	3.46461	-3.46461	2523	0.00199253	chr10	119494493	119494991	16039756	FALSE	TRUE
chr10_119609_120162	0.10614	0.220581	0.114441	18171	0.378721	18564	408	83	5.27769e-08	7.27756	7.27756	18571	1.069e-06	chr10	119609	120162	119609	TRUE	FALSE
chr10_119805825_119806544	0.0167999	0.0236359	0.00683594	15547	0.0613742	14057	404	83	0.378421	0.422024	0.422024	14073	0.572013	chr10	119805825	119806544	15728203	FALSE	FALSE
chr10_120101564_120101937	0.00662231	0.0073204	0.00069809	12094	0.0756529	14692	394	83	0.277774	0.556309	0.556309	14710	0.467386	chr10	120101564	120101937	15432810	FALSE	FALSE
chr10_120353692_120355821	0.65332	0.437012	-0.216309	910	-0.308108	1675	404	82	1.07715e-05	4.96772	-4.96772	1647	9.86721e-05	chr10	120353692	120355821	15178926	FALSE	TRUE
chr10_120513949_120515108	0.00828552	0.00926971	0.000984192	12571.5	0.128663	16484	405	83	0.0646767	1.18925	1.18925	16505	0.162634	chr10	120513949	120515108	15019639	FALSE	FALSE
chr10_1205562_1205859	0.906738	0.829102	-0.0776367	3016.5	-0.342553	1204	373	79	1.71006e-06	5.76699	-5.76699	1268	2.04857e-05	chr10	1205562	1205859	1205562	TRUE	TRUE
chr10_120801661_120802226	0.964355	0.964844	0.000488281	11778.5	-0.0518363	8194	388	80	0.465337	0.332232	-0.332232	8211	0.651124	chr10	120801661	120802226	14732521	FALSE	FALSE
chr10_120839592_120840480	0.00897217	0.00704193	-0.00193024	8528.5	-0.0218965	9668	401	82	0.754879	0.122123	-0.122123	9671	0.863682	chr10	120839592	120840480	14694267	FALSE	FALSE
chr10_12084236_12085431	0.0351562	0.0282593	-0.00689697	6566	-0.196621	3609	410	83	0.00471136	2.32685	-2.32685	3553	0.0187176	chr10	12084236	12085431	12084236	FALSE	FALSE
chr10_120863620_120864216	0.00758743	0.00618744	-0.00139999	8989.5	0.011639	11481	392	80	0.869051	0.0609546	0.0609546	11477	0.930112	chr10	120863620	120864216	14670531	FALSE	FALSE
chr10_120924785_120925558	0.0212402	0.0372314	0.0159912	16423	0.309237	18343	408	83	8.85791e-06	5.05267	5.05267	18346	8.31889e-05	chr10	120924785	120925558	14609189	FALSE	FALSE
chr10_120938028_120938418	0.00300598	0.00377846	0.000772476	12216	0.0326426	12612	399	82	0.640285	0.193627	0.193627	12620	0.786338	chr10	120938028	120938418	14596329	FALSE	FALSE
chr10_120966127_120967623	0.0163574	0.015419	-0.000938416	9496.5	-0.0485176	8354	408	83	0.485953	0.313406	-0.313406	8335	0.667753	chr10	120966127	120967623	14567124	FALSE	FALSE
chr10_12110700_12111303	0.0143585	0.0147705	0.000411987	11626.5	-0.0228645	9617	401	83	0.743093	0.128957	-0.128957	9605	0.856723	chr10	12110700	12111303	12110700	FALSE	FALSE
chr10_121301478_121303169	0.0583801	0.0619812	0.00360107	14791	0.0631349	14134	408	83	0.36451	0.438291	0.438291	14154	0.558236	chr10	121301478	121303169	14231578	FALSE	TRUE
chr10_121355813_121356958	0.036499	0.0326843	-0.0038147	7506	-0.128122	5261	410	83	0.0655596	1.18336	-1.18336	5229	0.164412	chr10	121355813	121356958	14177789	FALSE	FALSE
chr10_121410566_121411827	0.0259857	0.0196228	-0.00636292	6677	-0.0831743	6820	404	83	0.232547	0.633489	-0.633489	6799	0.415024	chr10	121410566	121411827	14122920	FALSE	FALSE
chr10_121485063_121485319	0.0177917	0.0148163	-0.00297546	7869	-0.0136573	10141	392	82	0.845919	0.0726714	-0.0726714	10142	0.916294	chr10	121485063	121485319	14049428	FALSE	FALSE
chr10_121577529_121578385	0.921387	0.928711	0.00732422	15614.5	0.0479863	13403	389	81	0.496879	0.303749	0.303749	13388	0.677234	chr10	121577529	121578385	13956362	FALSE	FALSE
chr10_121631654_121633104	0.0112839	0.0108185	-0.000465393	10118	0.0167899	11741	404	83	0.809787	0.0916293	0.0916293	11746	0.895483	chr10	121631654	121633104	13901643	FALSE	FALSE
chr10_121652003_121652507	0.00313568	0.00291443	-0.000221252	10495	0.00567073	11169	400	82	0.935502	0.0289552	0.0289552	11169	0.967893	chr10	121652003	121652507	13882240	FALSE	FALSE
chr10_12171225_12172038	0.0059967	0.00572586	-0.000270844	10404	-0.0652201	7575	385	82	0.352387	0.45298	-0.45298	7568	0.546273	chr10	12171225	12172038	12171225	FALSE	FALSE
chr10_121770981_121771423	0.702148	0.765625	0.0634766	17721.5	0.0455242	13279	382	82	0.517801	0.285838	0.285838	13265	0.692916	chr10	121770981	121771423	13763324	FALSE	TRUE
chr10_122102_122620	0.19043	0.169434	-0.0209961	4948.5	0.00800964	11288	405	82	0.909226	0.0413284	0.0413284	11289	0.953857	chr10	122102	122620	122102	TRUE	FALSE
chr10_122216259_122217377	0.0866699	0.053894	-0.0327759	4377	-0.181777	3932	403	82	0.00943137	2.02543	-2.02543	3912	0.0335816	chr10	122216259	122217377	13317370	FALSE	TRUE
chr10_12237832_12238377	0.0077858	0.0087204	0.000934601	12476.5	0.0277021	12350	394	82	0.693004	0.159264	0.159264	12345	0.822941	chr10	12237832	12238377	12237832	FALSE	FALSE
chr10_122708510_122708899	0.719238	0.268799	-0.450439	39	-0.320606	1485	367	77	9.64945e-06	5.0155	-5.0155	1622	8.96786e-05	chr10	122708510	122708899	12825848	FALSE	FALSE
chr10_122739052_122739391	0.0400391	0.0878906	0.0478516	17489.5	0.165474	17160	392	82	0.0184005	1.73517	1.73517	17165	0.0589017	chr10	122739052	122739391	12795356	FALSE	FALSE
chr10_123356616_123358285	0.0460205	0.0725708	0.0265503	16916	0.160347	17094	408	83	0.0212384	1.67288	1.67288	17110	0.06642	chr10	123356616	123358285	12176462	FALSE	FALSE
chr10_123368180_123368733	0.185547	0.180908	-0.00463867	7184	-0.0103514	10311	390	81	0.883735	0.053678	-0.053678	10314	0.938435	chr10	123368180	123368733	12166014	FALSE	FALSE
chr10_123686972_123688109	0.00802612	0.0103912	0.00236511	14096	0.130081	16519	405	82	0.0631184	1.19984	1.19984	16523	0.159572	chr10	123686972	123688109	11846638	FALSE	FALSE
chr10_123734027_123734865	0.020874	0.0205383	-0.000335693	10306.5	-0.0220488	9661.5	406	83	0.7517	0.123955	-0.123955	9645	0.862643	chr10	123734027	123734865	11799882	FALSE	FALSE
chr10_123872119_123873462	0.0131683	0.0145187	0.0013504	13074	0.043847	13184	402	83	0.529442	0.276182	0.276182	13199	0.702572	chr10	123872119	123873462	11661285	FALSE	FALSE
chr10_12390802_12392589	0.034729	0.0411377	0.00640869	15475	0.0571848	13860	410	83	0.411274	0.385868	0.385868	13877	0.603654	chr10	12390802	12392589	12390802	FALSE	FALSE
chr10_123922850_123923542	0.899902	0.825684	-0.0742188	3105	-0.100344	6231	391	81	0.155096	0.8094	-0.8094	6232	0.311355	chr10	123922850	123923542	11611205	FALSE	FALSE
chr10_124134088_124134933	0.0108871	0.0100403	-0.000846863	9587.5	-0.0617624	7734	403	82	0.377946	0.422571	-0.422571	7728	0.571617	chr10	124134088	124134933	11399814	FALSE	FALSE
chr10_124220338_124222240	0.0331421	0.0218811	-0.011261	5797.5	-0.156627	4480	404	83	0.0245541	1.60988	-1.60988	4442	0.0750727	chr10	124220338	124222240	11312507	FALSE	TRUE
chr10_124578126_124578443	0.633301	0.375732	-0.257568	562.5	-0.42829	401	384	82	1.12268e-09	8.94974	-8.94974	405	4.35498e-08	chr10	124578126	124578443	10956304	FALSE	TRUE
chr10_124638743_124639793	0.0151291	0.0251923	0.0100632	15944	0.188398	17462	399	82	0.00716029	2.14507	2.14507	17467	0.0266291	chr10	124638743	124639793	10894954	FALSE	FALSE
chr10_124713268_124714249	0.0168152	0.0242615	0.00744629	15638.5	0.0482716	13414	400	81	0.492825	0.307308	0.307308	13408	0.67364	chr10	124713268	124714249	10820498	FALSE	FALSE
chr10_124739792_124740292	0.00365067	0.00401306	0.000362396	11535	0.0367538	12826	394	79	0.605356	0.217989	0.217989	12802	0.761522	chr10	124739792	124740292	10794455	FALSE	FALSE
chr10_124767758_124768897	0.0362854	0.0285339	-0.00775146	6401	0.0306641	12500	401	81	0.663443	0.178196	0.178196	12486	0.801703	chr10	124767758	124768897	10765850	FALSE	FALSE
chr10_124892266_124893337	0.21228	0.148193	-0.0640869	3370	-0.227754	2951	395	81	0.00123631	2.90787	-2.90787	2952	0.00601182	chr10	124892266	124893337	10641410	FALSE	TRUE
chr10_124894075_124897366	0.392822	0.320312	-0.0725098	3153	-0.080811	6902	410	83	0.245523	0.609907	-0.609907	6883	0.430643	chr10	124894075	124897366	10637381	FALSE	TRUE
chr10_124901907_124902617	0.798828	0.556641	-0.242188	683.5	-0.38569	721	399	82	3.72381e-08	7.42901	-7.42901	718	7.97853e-07	chr10	124901907	124902617	10632130	FALSE	TRUE
chr10_124905634_124906161	0.842773	0.587891	-0.254883	582.5	-0.339373	1248	399	83	1.13348e-06	5.94558	-5.94558	1207	1.4301e-05	chr10	124905634	124906161	10628586	FALSE	TRUE
chr10_124907283_124911035	0.527832	0.415527	-0.112305	2306.5	-0.198707	3569	410	83	0.00428841	2.3677	-2.3677	3507	0.0172865	chr10	124907283	124911035	10623712	FALSE	TRUE
chr10_124913631_124914726	0.0440063	0.0319824	-0.0120239	5717	-0.31157	1622	408	83	7.57911e-06	5.12038	-5.12038	1567	7.29713e-05	chr10	124913631	124914726	10620021	FALSE	FALSE
chr10_125425495_125426642	0.741699	0.494141	-0.247559	642.5	-0.320902	1482	395	82	4.76409e-06	5.32202	-5.32202	1454	4.95049e-05	chr10	125425495	125426642	10108105	FALSE	TRUE
chr10_125650820_125651373	0.685547	0.394775	-0.290771	362.5	-0.396268	638	401	83	1.30514e-08	7.88434	-7.88434	614	3.29784e-07	chr10	125650820	125651373	9883374	TRUE	FALSE
chr10_125732220_125732843	0.686523	0.435547	-0.250977	612	-0.219791	3111	394	82	0.00173262	2.7613	-2.7613	3090	0.00801937	chr10	125732220	125732843	9801904	TRUE	TRUE
chr10_125751132_125751984	0.523926	0.353271	-0.170654	1411	-0.296862	1826	405	83	2.01977e-05	4.6947	-4.6947	1774	0.000170846	chr10	125751132	125751984	9782763	TRUE	TRUE
chr10_125851151_125853233	0.0827637	0.0592346	-0.0235291	4800	-0.111901	5802	410	83	0.107784	0.967446	-0.967446	5771	0.238987	chr10	125851151	125853233	9681514	TRUE	FALSE
chr10_126077405_126078075	0.208008	0.226196	0.0181885	16546	0.0472086	13363	404	83	0.498163	0.302629	0.302629	13381	0.678034	chr10	126077405	126078075	9456672	TRUE	FALSE
chr10_126106818_126107862	0.0138321	0.0138016	-3.05176e-05	10820.5	-0.00365007	10661	406	83	0.958525	0.0183965	-0.0183965	10661	0.979008	chr10	126106818	126107862	9426885	TRUE	FALSE
chr10_126135809_126138896	0.368652	0.294189	-0.0744629	3099	-0.231149	2898	410	83	0.000892142	3.04957	-3.04957	2842	0.00454463	chr10	126135809	126138896	9395851	TRUE	TRUE
chr10_126150243_126150740	0.0102234	0.0113907	0.0011673	12818	0.045449	13275	399	82	0.516717	0.286747	0.286747	13269	0.692059	chr10	126150243	126150740	9384007	TRUE	FALSE
chr10_126431314_126433285	0.0170288	0.0293884	0.0123596	16154	0.240021	17960	409	83	0.000561983	3.25028	3.25028	17973	0.00306441	chr10	126431314	126433285	9101462	TRUE	FALSE
chr10_126480092_126480810	0.00541306	0.00552368	0.000110626	11132.5	-0.0233258	9595	401	82	0.739379	0.131133	-0.131133	9590	0.854122	chr10	126480092	126480810	9053937	TRUE	FALSE
chr10_126490161_126490934	0.0592651	0.0603638	0.00109863	12730	0.0886239	15234	408	82	0.20526	0.687696	0.687696	15230	0.379977	chr10	126490161	126490934	9043813	TRUE	FALSE
chr10_126605120_126606212	0.0355225	0.0265656	-0.00895691	6144	-0.174476	4096	405	83	0.0122397	1.91223	-1.91223	4052	0.0418932	chr10	126605120	126606212	8928535	TRUE	FALSE
chr10_126839791_126841034	0.660645	0.830078	0.169434	18405	0.336367	18443	402	82	1.56542e-06	5.80537	5.80537	18444	1.89836e-05	chr10	126839791	126841034	8693713	TRUE	TRUE
chr10_126847224_126851327	0.0931396	0.107239	0.0140991	16291	0.158742	17065	410	83	0.0225125	1.64758	1.64758	17086	0.0697297	chr10	126847224	126851327	8683420	TRUE	TRUE
chr10_126916576_126917326	0.870117	0.740234	-0.129883	2004.5	-0.268048	2287	374	80	0.000166826	3.77774	-3.77774	2343	0.00105668	chr10	126916576	126917326	8617421	TRUE	TRUE
chr10_127407627_127408566	0.0106049	0.0135727	0.00296783	14515.5	0.0910737	15318	406	83	0.190961	0.719056	0.719056	15340	0.361215	chr10	127407627	127408566	8126181	TRUE	FALSE
chr10_127462230_127462987	0.838379	0.778809	-0.0595703	3492	-0.245425	2638	398	81	0.000495283	3.30515	-3.30515	2628	0.00275278	chr10	127462230	127462987	8071760	TRUE	TRUE
chr10_127511329_127512197	0.00976562	0.0105286	0.000762939	12199.5	0.00904017	11343	402	82	0.897584	0.0469249	0.0469249	11344	0.947231	chr10	127511329	127512197	8022550	TRUE	FALSE
chr10_127584249_127585538	0.384277	0.266846	-0.117432	2221	-0.366618	911	410	83	1.3645e-07	6.86503	-6.86503	871	2.39599e-06	chr10	127584249	127585538	7949209	TRUE	FALSE
chr10_128076155_128077482	0.268555	0.227173	-0.0413818	4029.5	-0.223773	3029	410	83	0.00129779	2.8868	-2.8868	2969	0.00627361	chr10	128076155	128077482	7457265	TRUE	TRUE
chr10_128593609_128595048	0.0601196	0.0401306	-0.019989	5020	-0.207987	3353	407	83	0.00281128	2.5511	-2.5511	3303	0.0121085	chr10	128593609	128595048	6939699	TRUE	FALSE
chr10_128973590_128974064	0.964844	0.967285	0.00244141	14173	0.0321677	12585	392	82	0.646881	0.189176	0.189176	12583	0.791021	chr10	128973590	128974064	6560683	TRUE	FALSE
chr10_128993505_128995167	0.304688	0.360596	0.0559082	17618	-0.0103732	10309	410	83	0.881791	0.0546344	-0.0546344	10302	0.937677	chr10	128993505	128995167	6539580	TRUE	TRUE
chr10_129534410_129537366	0.583008	0.312256	-0.270752	475.5	-0.413429	505	410	83	2.80006e-09	8.55283	-8.55283	466	9.38495e-08	chr10	129534410	129537366	5997381	TRUE	TRUE
chr10_129705217_129706237	0.0430298	0.0463257	0.0032959	14663.5	0.0197341	11912	406	83	0.777155	0.109492	0.109492	11923	0.878319	chr10	129705217	129706237	5828510	TRUE	TRUE
chr10_129923813_129924962	0.00666809	0.00788116	0.00121307	12881	0.040968	13021	402	81	0.560688	0.251279	0.251279	13018	0.726409	chr10	129923813	129924962	5609785	TRUE	FALSE
chr10_129947728_129949099	0.616699	0.621094	0.00439453	15036	-0.0286738	9345	403	81	0.683999	0.164945	-0.164945	9353	0.816059	chr10	129947728	129949099	5585648	TRUE	TRUE
chr10_130008558_130009620	0.394043	0.453125	0.059082	17661	0.142157	16772	403	83	0.0413343	1.38369	1.38369	16789	0.114224	chr10	130008558	130009620	5525127	TRUE	TRUE
chr10_130063967_130064278	0.476807	0.233521	-0.243286	676	-0.411448	526	385	81	5.77524e-09	8.23843	-8.23843	542	1.65451e-07	chr10	130063967	130064278	5470469	TRUE	TRUE
chr10_13043094_13043781	0.198853	0.165894	-0.032959	4375	-0.174132	4104	393	83	0.012642	1.89818	-1.89818	4075	0.0430031	chr10	13043094	13043781	13043094	FALSE	TRUE
chr10_130508443_130508658	0.759766	0.40332	-0.356445	146	-0.407505	559	390	82	6.50431e-09	8.1868	-8.1868	557	1.81617e-07	chr10	130508443	130508658	5026089	TRUE	TRUE
chr10_131264948_131265710	0.05896	0.0817871	0.0228271	16766	0.149797	16908	404	83	0.0315312	1.50126	1.50126	16927	0.0919486	chr10	131264948	131265710	4269037	TRUE	FALSE
chr10_13141778_13142493	0.0129242	0.0142365	0.00131226	13017	0.0660678	14261	397	83	0.343484	0.464093	0.464093	14282	0.537637	chr10	13141778	13142493	13141778	FALSE	FALSE
chr10_131694674_131694933	0.724121	0.552734	-0.171387	1397	-0.295823	1846	391	81	2.76201e-05	4.55877	-4.55877	1848	0.000223618	chr10	131694674	131694933	3839814	TRUE	TRUE
chr10_131756690_131758787	0.55957	0.629883	0.0703125	17812.5	0.0272266	12317	408	83	0.695935	0.157431	0.157431	12325	0.824691	chr10	131756690	131758787	3775960	TRUE	TRUE
chr10_131761169_131771696	0.415527	0.333252	-0.0822754	2905.5	-0.194093	3671	410	83	0.005274	2.27786	-2.27786	3610	0.0206076	chr10	131761169	131771696	3763051	TRUE	TRUE
chr10_131843516_131844219	0.52832	0.485352	-0.0429688	3973.5	-0.167043	4261	394	81	0.0178547	1.74825	-1.74825	4269	0.0573898	chr10	131843516	131844219	3690528	TRUE	TRUE
chr10_131908731_131909886	0.0179749	0.0210571	0.00308228	14562	0.0808653	14918	406	83	0.245572	0.609822	0.609822	14937	0.430687	chr10	131908731	131909886	3624861	TRUE	FALSE
chr10_131934520_131935324	0.0114441	0.0098114	-0.00163269	8751.5	-0.00862434	10381	403	82	0.902306	0.0446464	-0.0446464	10380	0.949796	chr10	131934520	131935324	3599423	TRUE	FALSE
chr10_131988211_131989332	0.201416	0.29248	0.0910645	18002.5	0.248069	18013	406	81	0.000420671	3.37606	3.37606	18008	0.00237472	chr10	131988211	131989332	3545415	TRUE	FALSE
chr10_13203436_13203790	0.00770569	0.00671005	-0.000995636	9385.5	-0.0724217	7272	396	81	0.302895	0.518708	-0.518708	7277	0.495205	chr10	13203436	13203790	13203436	FALSE	FALSE
chr10_132873656_132873875	0.644531	0.26123	-0.383301	98.5	-0.379105	788	347	71	4.76182e-07	6.32223	-6.32223	1061	6.86288e-06	chr10	132873656	132873875	2660872	TRUE	TRUE
chr10_133109193_133111052	0.574219	0.363281	-0.210938	969.5	-0.230566	2905	406	82	0.000985289	3.00644	-3.00644	2875	0.00494518	chr10	133109193	133111052	2423695	TRUE	TRUE
chr10_13341377_13342223	0.0151596	0.0131073	-0.00205231	8416.5	-0.039285	8815	393	82	0.575793	0.239734	-0.239734	8811	0.739262	chr10	13341377	13342223	13341377	FALSE	FALSE
chr10_13344235_13344498	0.0148087	0.0133209	-0.00148773	8881.5	0.00974991	11378	394	82	0.889802	0.0507065	0.0507065	11379	0.942309	chr10	13344235	13344498	13344235	FALSE	FALSE
chr10_133794898_133796598	0.193481	0.169678	-0.0238037	4792.5	-0.162219	4349	405	83	0.0198516	1.7022	-1.7022	4321	0.0627369	chr10	133794898	133796598	1738149	TRUE	FALSE
chr10_133849676_133850826	0.0792847	0.0943604	0.0150757	16357.5	-0.00304878	10700	404	82	0.965604	0.0152009	-0.0152009	10698	0.982543	chr10	133849676	133850826	1683921	TRUE	TRUE
chr10_133879005_133879255	0.20459	0.162476	-0.0421143	4003.5	-0.0682865	7447	392	82	0.330778	0.480463	-0.480463	7447	0.524409	chr10	133879005	133879255	1655492	TRUE	FALSE
chr10_133937695_133938295	0.839355	0.614258	-0.225098	829.5	-0.451709	275	395	80	1.8382e-10	9.73561	-9.73561	287	9.81211e-09	chr10	133937695	133938295	1596452	TRUE	TRUE
chr10_133951698_133952012	0.75	0.624512	-0.125488	2096.5	-0.156538	4482	369	80	0.0281239	1.55092	-1.55092	4527	0.0839461	chr10	133951698	133952012	1582735	TRUE	TRUE
chr10_133953845_133954279	0.791504	0.517578	-0.273926	452	-0.36846	895	379	82	1.65965e-07	6.77998	-6.77998	896	2.82389e-06	chr10	133953845	133954279	1580468	TRUE	TRUE
chr10_133998912_134001500	0.297607	0.205078	-0.0925293	2707	-0.119127	5540	409	83	0.0869426	1.06077	-1.06077	5509	0.203594	chr10	133998912	134001500	1533247	TRUE	TRUE
chr10_134016043_134016344	0.791016	0.706543	-0.0844727	2863.5	-0.13484	5076	386	83	0.0538782	1.26859	-1.26859	5071	0.140868	chr10	134016043	134016344	1518403	TRUE	FALSE
chr10_134019500_134019776	0.81543	0.689941	-0.125488	2096.5	-0.313929	1587	410	83	6.40578e-06	5.19343	-5.19343	1530	6.3035e-05	chr10	134019500	134019776	1514971	TRUE	TRUE
chr10_134120447_134122422	0.0515137	0.0944214	0.0429077	17391	0.296033	18284	410	83	2.08812e-05	4.68024	4.68024	18295	0.000176071	chr10	134120447	134122422	1412325	TRUE	FALSE
chr10_134145177_134146025	0.0118103	0.00727844	-0.00453186	7214.5	-0.108404	5946	397	82	0.121365	0.915905	-0.915905	5930	0.260231	chr10	134145177	134146025	1388722	TRUE	FALSE
chr10_134209367_134211056	0.12793	0.230591	0.102661	18088	0.272502	18171	408	83	9.02752e-05	4.04443	4.04443	18180	0.000621608	chr10	134209367	134211056	1323691	TRUE	FALSE
chr10_134218268_134219615	0.929688	0.913086	-0.0166016	5285	-0.0921716	6498	406	83	0.185664	0.731273	-0.731273	6472	0.354091	chr10	134218268	134219615	1315132	TRUE	TRUE
chr10_134266678_134266934	0.0107498	0.0150452	0.00429535	15001.5	0.148335	16883	397	81	0.0352094	1.45334	1.45334	16877	0.100592	chr10	134266678	134266934	1267813	TRUE	FALSE
chr10_134350302_134351119	0.0268555	0.0360718	0.00921631	15855	0.153268	16973	409	83	0.0276262	1.55868	1.55868	16992	0.082658	chr10	134350302	134351119	1183628	TRUE	FALSE
chr10_134411241_134411481	0.856445	0.845215	-0.0112305	5806.5	-0.107246	5997	345	69	0.159277	0.797847	-0.797847	6260	0.31783	chr10	134411241	134411481	1123266	TRUE	TRUE
chr10_134504420_134505591	0.931641	0.936523	0.00488281	15168	0.0939145	15430	375	78	0.191511	0.717807	0.717807	15336	0.36189	chr10	134504420	134505591	1029156	TRUE	TRUE
chr10_134527742_134528091	0.953125	0.942383	-0.0107422	5868.5	-0.184473	3882	384	80	0.00941275	2.02628	-2.02628	3910	0.0335344	chr10	134527742	134528091	1006656	TRUE	FALSE
chr10_134562566_134563206	0.89209	0.888184	-0.00390625	7452	-0.00244521	10736	394	82	0.972546	0.0120898	-0.0120898	10736	0.985805	chr10	134562566	134563206	971541	TRUE	TRUE
chr10_134566441_134566916	0.956055	0.955078	-0.000976562	9429.5	0.0476999	13389	395	82	0.496705	0.303901	0.303901	13389	0.677066	chr10	134566441	134566916	967831	TRUE	FALSE
chr10_134597357_134602649	0.509766	0.526367	0.0166016	16454.5	-0.0505143	8252	410	83	0.467989	0.329764	-0.329764	8228	0.653163	chr10	134597357	134602649	932098	TRUE	TRUE
chr10_134605584_134606388	0.795898	0.731445	-0.0644531	3363.5	-0.148082	4695	176	32	0.182889	0.737812	-0.737812	6445	0.35062	chr10	134605584	134606388	928359	TRUE	TRUE
chr10_134607423_134607880	0.190918	0.138794	-0.052124	3681	-0.176253	4049	402	82	0.0118564	1.92605	-1.92605	4027	0.0408422	chr10	134607423	134607880	926867	TRUE	TRUE
chr10_134611552_134613137	0.806641	0.558594	-0.248047	637	-0.549386	32	403	82	4.28851e-15	14.3677	-14.3677	30	2.29602e-12	chr10	134611552	134613137	921610	TRUE	TRUE
chr10_134732601_134733777	0.509277	0.293457	-0.21582	916.5	-0.33565	1293	397	83	1.49887e-06	5.82424	-5.82424	1248	1.82356e-05	chr10	134732601	134733777	800970	TRUE	TRUE
chr10_134735972_134736254	0.568359	0.369629	-0.19873	1098	-0.329555	1366	383	82	2.79178e-06	5.55412	-5.55412	1348	3.14533e-05	chr10	134735972	134736254	798493	TRUE	TRUE
chr10_134740801_134741033	0.760742	0.406738	-0.354004	154.5	-0.496918	114	382	79	3.5063e-12	11.4552	-11.4552	135	3.91036e-10	chr10	134740801	134741033	793714	TRUE	TRUE
chr10_134755663_134756852	0.375488	0.234741	-0.140747	1849	-0.368622	892.5	408	83	1.18006e-07	6.9281	-6.9281	856	2.11373e-06	chr10	134755663	134756852	777895	TRUE	FALSE
chr10_134834676_134835899	0.68457	0.430176	-0.254395	587.5	-0.425286	425	405	83	1.01544e-09	8.99335	-8.99335	393	4.04792e-08	chr10	134834676	134835899	698848	TRUE	TRUE
chr10_134843465_134843776	0.448975	0.191162	-0.257812	560.5	-0.341213	1221	390	82	1.17754e-06	5.92902	-5.92902	1212	1.4797e-05	chr10	134843465	134843776	690971	TRUE	TRUE
chr10_134844442_134844934	0.522949	0.231445	-0.291504	360	-0.41874	467	395	82	2.37376e-09	8.62456	-8.62456	453	8.20569e-08	chr10	134844442	134844934	689813	TRUE	TRUE
chr10_134861174_134861568	0.806641	0.439209	-0.367432	120	-0.45877	243	385	83	5.4319e-11	10.265	-10.265	229	3.64774e-09	chr10	134861174	134861568	673179	TRUE	TRUE
chr10_134901198_134902619	0.254883	0.0800781	-0.174805	1357.5	-0.34678	1149	405	83	6.37342e-07	6.19563	-6.19563	1115	8.75875e-06	chr10	134901198	134902619	632128	TRUE	TRUE
chr10_134911976_134912483	0.473633	0.245605	-0.228027	800	-0.374562	833	400	80	1.21534e-07	6.9153	-6.9153	859	2.1707e-06	chr10	134911976	134912483	622264	TRUE	TRUE
chr10_134937966_134938481	0.142822	0.0979614	-0.0448608	3912	-0.106329	6024	395	83	0.127707	0.893787	-0.893787	5996	0.270062	chr10	134937966	134938481	596266	TRUE	TRUE
chr10_134940334_134940875	0.758789	0.691895	-0.0668945	3298.5	-0.201029	3504	410	83	0.00385843	2.41359	-2.41359	3451	0.015836	chr10	134940334	134940875	593872	TRUE	TRUE
chr10_134941925_134943001	0.684082	0.547852	-0.13623	1917.5	-0.277474	2143	395	83	7.01909e-05	4.15372	-4.15372	2098	0.000499278	chr10	134941925	134943001	591746	TRUE	FALSE
chr10_134955508_134955800	0.664062	0.429443	-0.234619	752	-0.395704	644	387	80	2.48813e-08	7.60413	-7.60413	670	5.71294e-07	chr10	134955508	134955800	578947	TRUE	TRUE
chr10_134973510_134974311	0.0487061	0.0463257	-0.00238037	8224.5	-0.0218486	9674	402	83	0.754183	0.122523	-0.122523	9665	0.863609	chr10	134973510	134974311	560436	TRUE	FALSE
chr10_135014703_135015402	0.55127	0.222412	-0.328857	237.5	-0.368957	889	393	81	1.68512e-07	6.77337	-6.77337	900	2.85724e-06	chr10	135014703	135015402	519345	TRUE	TRUE
chr10_135016379_135017476	0.568359	0.23877	-0.32959	231	-0.452809	269	399	82	1.03837e-10	9.98365	-9.98365	262	6.09871e-09	chr10	135016379	135017476	517271	TRUE	TRUE
chr10_135020618_135020932	0.754395	0.486572	-0.267822	492.5	-0.400934	610	389	82	1.14056e-08	7.94288	-7.94288	603	2.93688e-07	chr10	135020618	135020932	513815	TRUE	TRUE
chr10_135039937_135040196	0.317871	0.212524	-0.105347	2452	-0.116199	5653	384	79	0.103755	0.983991	-0.983991	5725	0.232419	chr10	135039937	135040196	494551	TRUE	TRUE
chr10_135043221_135044560	0.399902	0.296143	-0.10376	2487	-0.0763938	7100	408	83	0.272495	0.564641	-0.564641	7073	0.460889	chr10	135043221	135044560	490187	TRUE	TRUE
chr10_135048797_135052077	0.352539	0.193115	-0.159424	1562.5	-0.345695	1166	410	83	6.72368e-07	6.17239	-6.17239	1126	9.15516e-06	chr10	135048797	135052077	482670	TRUE	TRUE
chr10_135075001_135075452	0.0069809	0.0086441	0.00166321	13470	0.149356	16900	401	83	0.0320914	1.49361	1.49361	16917	0.0932626	chr10	135075001	135075452	459295	TRUE	FALSE
chr10_135089969_135090491	0.248047	0.338135	0.0900879	17990	0.0885983	15232	410	83	0.202933	0.692647	0.692647	15249	0.376909	chr10	135089969	135090491	444256	TRUE	FALSE
chr10_135121991_135122669	0.00880432	0.00749588	-0.00130844	9064	-0.0369444	8927	400	81	0.599991	0.221855	-0.221855	8931	0.75751	chr10	135121991	135122669	412078	TRUE	FALSE
chr10_135132006_135132458	0.0296631	0.057251	0.0275879	16959.5	0.180331	17360	390	82	0.0101439	1.9938	1.9938	17370	0.0357921	chr10	135132006	135132458	402289	TRUE	FALSE
chr10_135138682_135139717	0.29541	0.184937	-0.110474	2338	-0.227711	2953	410	83	0.00106382	2.97313	-2.97313	2897	0.00528834	chr10	135138682	135139717	395030	TRUE	FALSE
chr10_135148196_135150565	0.156372	0.144165	-0.012207	5702	-0.107197	6000	409	83	0.123492	0.908361	-0.908361	5958	0.263572	chr10	135148196	135150565	384182	TRUE	FALSE
chr10_135170645_135171954	0.19458	0.237061	0.0424805	17381.5	0.134568	16632	408	83	0.0532026	1.27407	1.27407	16648	0.13949	chr10	135170645	135171954	362793	TRUE	FALSE
chr10_135186693_135187181	0.0085907	0.00857544	-1.52588e-05	10845	-0.00110031	10796	399	82	0.987818	0.00532298	-0.00532298	10796	0.993838	chr10	135186693	135187181	347566	TRUE	FALSE
chr10_135191594_135193307	0.0727539	0.0880737	0.0153198	16379	0.0832474	15027	409	83	0.231671	0.635129	0.635129	15039	0.413625	chr10	135191594	135193307	341440	TRUE	FALSE
chr10_135207467_135208073	0.0139771	0.0126724	-0.00130463	9067	-0.0300319	9289	408	83	0.666377	0.17628	-0.17628	9278	0.803168	chr10	135207467	135208073	326674	TRUE	FALSE
chr10_135236687_135238237	0.571777	0.42749	-0.144287	1785	-0.231616	2887	406	83	0.000879657	3.05569	-3.05569	2834	0.00449448	chr10	135236687	135238237	296510	TRUE	TRUE
chr10_135238430_135238747	0.668457	0.580078	-0.0883789	2790	-0.210442	3302	393	81	0.00285	2.54516	-2.54516	3314	0.0122415	chr10	135238430	135238747	296000	TRUE	TRUE
chr10_135246474_135246901	0.693848	0.529297	-0.164551	1487.5	-0.282747	2041	394	82	5.57689e-05	4.25361	-4.25361	2027	0.000411534	chr10	135246474	135246901	287846	TRUE	TRUE
chr10_135259492_135260192	0.849121	0.783203	-0.065918	3327	-0.276837	2150	399	83	7.18596e-05	4.14352	-4.14352	2103	0.000509793	chr10	135259492	135260192	274555	TRUE	FALSE
chr10_135271870_135272144	0.896484	0.791992	-0.104492	2467.5	-0.32998	1361	374	80	3.58017e-06	5.4461	-5.4461	1402	3.87427e-05	chr10	135271870	135272144	262603	TRUE	TRUE
chr10_135273000_135273685	0.913574	0.847656	-0.065918	3327	-0.240396	2733	394	81	0.000652097	3.18569	-3.18569	2726	0.00347587	chr10	135273000	135273685	261062	TRUE	FALSE
chr10_135278716_135279116	0.820312	0.665039	-0.155273	1622	-0.33869	1252	387	82	1.43627e-06	5.84276	-5.84276	1240	1.75768e-05	chr10	135278716	135279116	255631	TRUE	TRUE
chr10_135333722_135334062	0.0270691	0.0357971	0.00872803	15793	0.0796216	14850	385	81	0.259935	0.585135	0.585135	14815	0.446663	chr10	135333722	135334062	200685	TRUE	FALSE
chr10_135341255_135342561	0.574219	0.424561	-0.149658	1704	-0.201199	3501	406	83	0.00385817	2.41362	-2.41362	3450	0.015836	chr10	135341255	135342561	192186	TRUE	TRUE
chr10_135378883_135379767	0.854004	0.753906	-0.100098	2556	-0.338486	1255	385	82	1.47349e-06	5.83165	-5.83165	1245	1.79735e-05	chr10	135378883	135379767	154980	TRUE	TRUE
chr10_135381534_135383032	0.664062	0.476074	-0.187988	1210	-0.314834	1573	404	83	6.18924e-06	5.20836	-5.20836	1521	6.13229e-05	chr10	135381534	135383032	151715	TRUE	TRUE
chr10_135383225_135383518	0.774414	0.714355	-0.0600586	3480	-0.180892	3949	394	81	0.0103163	1.98648	-1.98648	3955	0.0362909	chr10	135383225	135383518	151229	TRUE	TRUE
chr10_135436147_135436805	0.5	0.390381	-0.109619	2356	-0.330914	1350	410	83	1.96785e-06	5.70601	-5.70601	1302	2.30004e-05	chr10	135436147	135436805	97942	TRUE	TRUE
chr10_135450883_135451867	0.235107	0.128296	-0.106812	2421	-0.406494	565	410	83	5.12043e-09	8.29069	-8.29069	530	1.50607e-07	chr10	135450883	135451867	82880	TRUE	TRUE
chr10_135453951_135454528	0.563477	0.371826	-0.19165	1170.5	-0.377358	804	394	81	8.72832e-08	7.05907	-7.05907	812	1.64687e-06	chr10	135453951	135454528	80219	TRUE	TRUE
chr10_135477932_135498572	0.597656	0.423584	-0.174072	1364	-0.413929	499	410	83	2.67985e-09	8.57189	-8.57189	463	9.04678e-08	chr10	135477932	135498572	36175	TRUE	TRUE
chr10_13570128_13570864	0.0133896	0.0150452	0.00165558	13460	-0.0155288	10038	405	83	0.823831	0.0841619	-0.0841619	10032	0.903348	chr10	13570128	13570864	13570128	FALSE	FALSE
chr10_13628789_13629266	0.00709534	0.00925446	0.00215912	13950	0.125212	16387	388	79	0.0756874	1.12098	1.12098	16369	0.183333	chr10	13628789	13629266	13628789	FALSE	FALSE
chr10_13698562_13699540	0.953125	0.962891	0.00976562	15912	0.122975	16324	384	81	0.0818948	1.08674	1.08674	16294	0.194546	chr10	13698562	13699540	13698562	FALSE	TRUE
chr10_1382500_1383006	0.799316	0.716797	-0.0825195	2901.5	-0.339854	1237	404	83	1.06581e-06	5.97232	-5.97232	1197	1.35752e-05	chr10	1382500	1383006	1382500	TRUE	TRUE
chr10_13933482_13934184	0.416992	0.625	0.208008	18492	0.148014	16880	401	82	0.0346291	1.46056	1.46056	16885	0.0993279	chr10	13933482	13934184	13933482	FALSE	TRUE
chr10_1404659_1406219	0.861816	0.794922	-0.0668945	3298.5	-0.219924	3107	406	83	0.00158583	2.79974	-2.79974	3051	0.00743732	chr10	1404659	1406219	1404659	TRUE	TRUE
chr10_14645752_14646705	0.0186768	0.0158997	-0.0027771	7999	-0.0470354	8444	406	83	0.49956	0.301412	-0.301412	8424	0.678932	chr10	14645752	14646705	14645752	FALSE	FALSE
chr10_14879769_14881041	0.00619888	0.00782776	0.00162888	13434.5	0.0873864	15190	407	83	0.209431	0.678959	0.678959	15205	0.385793	chr10	14879769	14881041	14879769	FALSE	FALSE
chr10_14920320_14921688	0.020752	0.0229034	0.00215149	13941.5	0.0722008	14560	409	83	0.299596	0.523464	0.523464	14576	0.491962	chr10	14920320	14921688	14920320	FALSE	FALSE
chr10_14995680_14996431	0.00735474	0.0062561	-0.00109863	9280	-0.0669378	7504	394	83	0.337382	0.471879	-0.471879	7485	0.53072	chr10	14995680	14996431	14995680	FALSE	FALSE
chr10_15001272_15001840	0.0118408	0.0138016	0.00196075	13772	0.052737	13641	403	83	0.449286	0.347477	0.347477	13656	0.637341	chr10	15001272	15001840	15001272	FALSE	FALSE
chr10_1506344_1506708	0.898926	0.844238	-0.0546875	3628	-0.147029	4719	397	81	0.0369491	1.4324	-1.4324	4730	0.104653	chr10	1506344	1506708	1506344	TRUE	TRUE
chr10_15130386_15130913	0.0111923	0.0113983	0.000205994	11272.5	-0.000368618	10833	397	82	0.996153	0.00167415	-0.00167415	10833	0.998337	chr10	15130386	15130913	15130386	FALSE	FALSE
chr10_15138965_15139851	0.00656509	0.00610352	-0.000461578	10120.5	0.000180668	10861	405	82	0.998283	0.000746147	0.000746147	10861	0.999004	chr10	15138965	15139851	15138965	FALSE	FALSE
chr10_15209824_15210714	0.00964355	0.0100784	0.000434875	11677	0.00295921	11018	399	83	0.966472	0.0148106	0.0148106	11018	0.983071	chr10	15209824	15210714	15209824	FALSE	FALSE
chr10_15412419_15413040	0.0175629	0.0205078	0.00294495	14502.5	0.0834387	15036	405	82	0.233337	0.632016	0.632016	15033	0.416046	chr10	15412419	15413040	15412419	FALSE	FALSE
chr10_15761423_15762101	0.42627	0.179932	-0.246338	653	-0.209472	3325	397	81	0.0029552	2.52941	-2.52941	3331	0.0126227	chr10	15761423	15762101	15761423	FALSE	TRUE
chr10_16478803_16479303	0.0103683	0.0180969	0.00772858	15671	0.2408	17967	401	82	0.000584883	3.23293	3.23293	17966	0.00316807	chr10	16478803	16479303	16478803	FALSE	FALSE
chr10_16561604_16563822	0.625	0.577148	-0.0478516	3804.5	-0.0558787	7986	406	83	0.422438	0.374237	-0.374237	7955	0.614455	chr10	16561604	16563822	16561604	FALSE	TRUE
chr10_16859089_16859975	0.00800323	0.00669098	-0.00131226	9057	0.013091	11547	381	81	0.851778	0.0696738	0.0696738	11546	0.919292	chr10	16859089	16859975	16859089	FALSE	FALSE
chr10_17270430_17272617	0.0525818	0.0238342	-0.0287476	4547	-0.328954	1379	409	83	2.27266e-06	5.64347	-5.64347	1325	2.6091e-05	chr10	17270430	17272617	17270430	FALSE	FALSE
chr10_1741424_1744125	0.579102	0.219238	-0.359863	138	-0.439525	333	323	60	6.37256e-08	7.19569	-7.19569	776	1.2568e-06	chr10	1741424	1744125	1741424	TRUE	TRUE
chr10_17495407_17496721	0.0412598	0.0435791	0.00231934	14065.5	-0.0193728	9791	403	83	0.781275	0.107196	-0.107196	9783	0.880691	chr10	17495407	17496721	17495407	FALSE	TRUE
chr10_17658665_17659639	0.0158234	0.0153046	-0.000518799	10012.5	-0.0426669	8648	399	83	0.540862	0.266913	-0.266913	8635	0.711315	chr10	17658665	17659639	17658665	FALSE	FALSE
chr10_1778784_1780018	0.197998	0.125122	-0.072876	3139.5	-0.229336	2922	401	83	0.00100124	2.99946	-2.99946	2879	0.00501716	chr10	1778784	1780018	1778784	TRUE	TRUE
chr10_180582_182452	0.01297	0.0136795	0.000709534	12113.5	0.052517	13628	404	83	0.451092	0.345734	0.345734	13645	0.638971	chr10	180582	182452	180582	TRUE	FALSE
chr10_18429125_18430234	0.10144	0.0888672	-0.0125732	5665	-0.068657	7429	408	83	0.324057	0.489379	-0.489379	7405	0.517205	chr10	18429125	18430234	18429125	FALSE	TRUE
chr10_18940528_18940765	0.00233078	0.00457764	0.00224686	14017.5	0.084571	15074	394	81	0.222956	0.651781	0.651781	15100	0.402631	chr10	18940528	18940765	18940528	FALSE	FALSE
chr10_18948113_18948711	0.00486755	0.00603104	0.00116348	12813.5	0.109513	15960	402	83	0.116086	0.935222	0.935222	15983	0.252347	chr10	18948113	18948711	18948113	FALSE	FALSE
chr10_20104451_20106105	0.0307465	0.0452271	0.0144806	16325	0.105918	15844	407	83	0.128192	0.89214	0.89214	15865	0.270656	chr10	20104451	20106105	20104451	FALSE	FALSE
chr10_21462128_21463808	0.0249329	0.0961304	0.071167	17818	0.451837	18678	408	83	8.45176e-11	10.0731	10.0731	18683	5.26087e-09	chr10	21462128	21463808	21462128	FALSE	TRUE
chr10_21783198_21786420	0.0458374	0.0518799	0.00604248	15419.5	-0.0145754	10092	410	83	0.834364	0.0786447	-0.0786447	10087	0.909985	chr10	21783198	21786420	21783198	FALSE	FALSE
chr10_21788633_21789588	0.935547	0.929688	-0.00585938	6804	-0.0659898	7543	394	80	0.352034	0.453415	-0.453415	7566	0.54584	chr10	21788633	21789588	21788633	FALSE	TRUE
chr10_21797632_21799341	0.901855	0.868164	-0.0336914	4328.5	-0.158988	4424	405	82	0.0231296	1.63583	-1.63583	4408	0.0713812	chr10	21797632	21799341	21797632	FALSE	FALSE
chr10_21805879_21806630	0.0147705	0.0130844	-0.0016861	8708	-0.0156686	10030	406	83	0.822249	0.0849965	-0.0849965	10022	0.902296	chr10	21805879	21806630	21805879	FALSE	FALSE
chr10_21814786_21815716	0.0664062	0.0603943	-0.00601196	6764.5	-0.113111	5770	407	83	0.104246	0.98194	-0.98194	5733	0.233157	chr10	21814786	21815716	21814786	FALSE	FALSE
chr10_21816296_21816528	0.132568	0.129883	-0.00268555	8049	-0.0845036	6777	396	82	0.228334	0.641429	-0.641429	6775	0.409424	chr10	21816296	21816528	21816296	FALSE	FALSE
chr10_21822850_21824410	0.0238037	0.016983	-0.00682068	6607.5	-0.123038	5425	410	83	0.0770038	1.11349	-1.11349	5385	0.185657	chr10	21822850	21824410	21822850	FALSE	FALSE
chr10_22292300_22292897	0.0093689	0.0115356	0.00216675	13957.5	0.096209	15517	396	81	0.172236	0.763876	0.763876	15496	0.336216	chr10	22292300	22292897	22292300	FALSE	FALSE
chr10_22518026_22518334	0.0614624	0.0533752	-0.00808716	6318.5	-0.106267	6027	406	83	0.127017	0.896138	-0.896138	5994	0.268964	chr10	22518026	22518334	22518026	FALSE	FALSE
chr10_22540707_22542739	0.507324	0.52002	0.0126953	16189	-0.00281916	10710	406	83	0.96804	0.0141069	-0.0141069	10709	0.984005	chr10	22540707	22542739	22540707	FALSE	TRUE
chr10_22614275_22614934	0.0341797	0.0353394	0.00115967	12806	0.00499448	11129	398	82	0.943535	0.025242	0.025242	11128	0.971358	chr10	22614275	22614934	22614275	FALSE	FALSE
chr10_22623350_22625875	0.672852	0.676758	0.00390625	14890.5	-0.0653496	7567.5	408	83	0.34792	0.458521	-0.458521	7540	0.542044	chr10	22623350	22625875	22623350	FALSE	TRUE
chr10_22629360_22630328	0.0129776	0.0113983	-0.00157928	8804	-0.0738299	7203	407	82	0.291446	0.535442	-0.535442	7194	0.48297	chr10	22629360	22630328	22629360	FALSE	FALSE
chr10_22634000_22634862	0.8125	0.755859	-0.0566406	3571	-0.113878	5736	405	83	0.102063	0.991131	-0.991131	5701	0.2297	chr10	22634000	22634862	22634000	FALSE	TRUE
chr10_22725491_22726764	0.1604	0.215332	0.0549316	17597.5	0.20948	17689	406	82	0.00275929	2.5592	2.5592	17692	0.0119065	chr10	22725491	22726764	22725491	FALSE	TRUE
chr10_22764708_22767050	0.84082	0.764648	-0.0761719	3056.5	-0.252361	2522	407	83	0.000288762	3.53946	-3.53946	2479	0.00171373	chr10	22764708	22767050	22764708	FALSE	TRUE
chr10_23002155_23003790	0.0331421	0.0276337	-0.00550842	6896	-0.142081	4871	410	83	0.0411434	1.3857	-1.3857	4829	0.113784	chr10	23002155	23003790	23002155	FALSE	FALSE
chr10_23384533_23385078	0.0650635	0.0577087	-0.00735474	6472.5	-0.0551524	8025	400	82	0.431262	0.365258	-0.365258	8022	0.62168	chr10	23384533	23385078	23384533	FALSE	FALSE
chr10_23461300_23461610	0.383789	0.187744	-0.196045	1126	-0.287193	1982	396	81	4.61294e-05	4.33602	-4.33602	1986	0.00034752	chr10	23461300	23461610	23461300	FALSE	TRUE
chr10_23462224_23463889	0.609375	0.329102	-0.280273	424	-0.31382	1590	404	83	6.62909e-06	5.17855	-5.17855	1536	6.50276e-05	chr10	23462224	23463889	23462224	FALSE	TRUE
chr10_23480697_23482455	0.480225	0.193726	-0.286621	391	-0.303438	1742	410	83	1.29051e-05	4.88924	-4.88924	1687	0.000115413	chr10	23480697	23482455	23480697	FALSE	TRUE
chr10_23487757_23488543	0.230957	0.115601	-0.115356	2254	-0.334048	1317	398	82	1.88401e-06	5.72492	-5.72492	1292	2.21866e-05	chr10	23487757	23488543	23487757	FALSE	FALSE
chr10_23727836_23729523	0.0182037	0.0150986	-0.00310516	7806.5	-0.110167	5872	410	83	0.11335	0.94558	-0.94558	5836	0.247953	chr10	23727836	23729523	23727836	FALSE	FALSE
chr10_23983366_23984978	0.36084	0.142822	-0.218018	893.5	-0.352173	1080	408	83	4.18801e-07	6.37799	-6.37799	1037	6.17361e-06	chr10	23983366	23984978	23983366	FALSE	TRUE
chr10_25011963_25013816	0.0200653	0.0181885	-0.00187683	8568	-0.0666986	7515	407	82	0.34057	0.467794	-0.467794	7501	0.534327	chr10	25011963	25013816	25011963	FALSE	FALSE
chr10_25241110_25241900	0.0622253	0.155762	0.0935059	18019.5	0.318256	18373	407	83	4.83424e-06	5.31567	5.31567	18385	5.00478e-05	chr10	25241110	25241900	25241110	FALSE	TRUE
chr10_2543463_2544121	0.74707	0.64209	-0.10498	2456	-0.263057	2365	391	83	0.000166103	3.77962	-3.77962	2342	0.00105276	chr10	2543463	2544121	2543463	TRUE	TRUE
chr10_25463756_25465639	0.325684	0.137695	-0.187988	1210	-0.251073	2542	410	83	0.000307478	3.51219	-3.51219	2499	0.00180876	chr10	25463756	25465639	25463756	FALSE	TRUE
chr10_2563739_2565222	0.464355	0.429199	-0.0351562	4270	-0.0790456	6983	241	40	0.424029	0.372604	-0.372604	7966	0.615899	chr10	2563739	2565222	2563739	TRUE	TRUE
chr10_26222921_26224022	0.357666	0.232666	-0.125	2102.5	-0.144143	4797	405	82	0.0394793	1.40363	-1.40363	4782	0.110285	chr10	26222921	26224022	26222921	FALSE	TRUE
chr10_26504383_26507434	0.441895	0.314697	-0.127197	2061	-0.21894	3129.5	407	83	0.00166081	2.77968	-2.77968	3070	0.00773666	chr10	26504383	26507434	26504383	FALSE	TRUE
chr10_26680634_26680999	0.732422	0.448975	-0.283447	410	-0.390518	686	394	81	3.05884e-08	7.51444	-7.51444	698	6.75829e-07	chr10	26680634	26680999	26680634	FALSE	TRUE
chr10_26727061_26727992	0.274414	0.187012	-0.0874023	2807	-0.143532	4816	395	82	0.0407517	1.38985	-1.38985	4816	0.113063	chr10	26727061	26727992	26727061	FALSE	TRUE
chr10_26855906_26856198	0.374023	0.137695	-0.236328	737	-0.112832	5778	376	80	0.112859	0.947464	-0.947464	5826	0.247282	chr10	26855906	26856198	26855906	FALSE	TRUE
chr10_26986142_26987088	0.00578308	0.00816345	0.00238037	14107	0.130162	16522	407	83	0.0615383	1.21085	1.21085	16545	0.156464	chr10	26986142	26987088	26986142	FALSE	FALSE
chr10_27149166_27150229	0.0507507	0.0439758	-0.0067749	6610.5	-0.109529	5894.5	407	83	0.115679	0.936745	-0.936745	5859	0.251736	chr10	27149166	27150229	27149166	FALSE	FALSE
chr10_27389075_27389622	0.00398636	0.00410461	0.000118256	11141	-0.0658017	7552	390	83	0.345095	0.462062	-0.462062	7525	0.539293	chr10	27389075	27389622	27389075	FALSE	FALSE
chr10_27443030_27443405	0.00619507	0.00563049	-0.000564575	9940.5	0.0332796	12648	388	80	0.638282	0.194987	0.194987	12633	0.78541	chr10	27443030	27443405	27443030	FALSE	FALSE
chr10_27529218_27530102	0.0102997	0.012619	0.00231934	14065.5	0.10393	15790	404	82	0.13773	0.86097	0.86097	15788	0.285803	chr10	27529218	27530102	27529218	FALSE	FALSE
chr10_27530938_27531363	0.00533295	0.0069809	0.00164795	13452.5	0.0968274	15539	394	80	0.171816	0.764936	0.764936	15502	0.335674	chr10	27530938	27531363	27530938	FALSE	FALSE
chr10_27541297_27541883	0.333252	0.322998	-0.0102539	5935.5	0.00646862	11214	393	83	0.926527	0.0331418	0.0331418	11215	0.96371	chr10	27541297	27541883	27541297	FALSE	FALSE
chr10_27547668_27548402	0.29126	0.21875	-0.0725098	3153	-0.117528	5603	397	82	0.0937411	1.02807	-1.02807	5592	0.21558	chr10	27547668	27548402	27547668	FALSE	TRUE
chr10_27702368_27703378	0.700195	0.540527	-0.159668	1557.5	-0.376567	816	396	83	6.78467e-08	7.16847	-7.16847	787	1.32002e-06	chr10	27702368	27703378	27702368	FALSE	TRUE
chr10_27793049_27793764	0.00964355	0.0113754	0.00173187	13540	0.0577297	13889	403	83	0.4075	0.389873	0.389873	13903	0.600227	chr10	27793049	27793764	27793049	FALSE	FALSE
chr10_28030182_28035211	0.22876	0.199341	-0.0294189	4515.5	-0.116918	5629	409	83	0.092958	1.03171	-1.03171	5576	0.214416	chr10	28030182	28035211	28030182	FALSE	TRUE
chr10_28287447_28288057	0.0751343	0.0446167	-0.0305176	4473.5	-0.146585	4734	401	82	0.0363879	1.43904	-1.43904	4717	0.103423	chr10	28287447	28288057	28287447	FALSE	FALSE
chr10_28591622_28592117	0.00377083	0.00735474	0.00358391	14785	0.200953	17601	386	81	0.00374351	2.42672	2.42672	17633	0.015432	chr10	28591622	28592117	28591622	FALSE	FALSE
chr10_28821189_28823092	0.0240784	0.0214233	-0.00265503	8068	-0.0317955	9188	410	83	0.647916	0.188482	-0.188482	9174	0.791557	chr10	28821189	28823092	28821189	FALSE	FALSE
chr10_28965704_28967266	0.0314941	0.0534973	0.0220032	16739	0.16852	17212	408	82	0.0159971	1.79596	1.79596	17224	0.0522983	chr10	28965704	28967266	28965704	FALSE	FALSE
chr10_29011053_29011453	0.150391	0.294189	0.143799	18313.5	0.183275	17399	376	79	0.0104104	1.98253	1.98253	17362	0.036574	chr10	29011053	29011453	29011053	FALSE	FALSE
chr10_29698362_29699044	0.0126038	0.00975037	-0.00285339	7946	-0.0495448	8300	401	83	0.477353	0.32116	-0.32116	8277	0.661307	chr10	29698362	29699044	29698362	FALSE	FALSE
chr10_30024072_30026077	0.0199585	0.0260925	0.00613403	15433.5	0.229143	17868	409	82	0.0010513	2.97827	2.97827	17865	0.00523166	chr10	30024072	30026077	30024072	FALSE	FALSE
chr10_30347599_30348416	0.137695	0.199829	0.0621338	17698	0.0250904	12200	400	83	0.719225	0.143135	0.143135	12208	0.840321	chr10	30347599	30348416	30347599	FALSE	TRUE
chr10_30722378_30723707	0.00733948	0.00986481	0.00252533	14247	0.221828	17794	408	83	0.00143613	2.84281	2.84281	17808	0.00682234	chr10	30722378	30723707	30722378	FALSE	FALSE
chr10_31073835_31074433	0.236328	0.14209	-0.0942383	2673.5	-0.116264	5648	386	82	0.0981454	1.00813	-1.00813	5649	0.223324	chr10	31073835	31074433	31073835	FALSE	TRUE
chr10_3108650_3111419	0.0863647	0.109375	0.0230103	16772.5	0.139142	16715	410	83	0.0455177	1.34182	1.34182	16735	0.123222	chr10	3108650	3111419	3108650	TRUE	FALSE
chr10_31320483_31321553	0.0223236	0.0193329	-0.00299072	7859	-0.0361743	8958	405	83	0.603712	0.21917	-0.21917	8952	0.760209	chr10	31320483	31321553	31320483	FALSE	FALSE
chr10_31422709_31423316	0.19873	0.335449	0.136719	18287.5	0.0684704	14381	407	83	0.325476	0.487481	0.487481	14392	0.518656	chr10	31422709	31423316	31422709	FALSE	TRUE
chr10_31607227_31610094	0.0352478	0.0307159	-0.00453186	7214.5	-0.125125	5359	410	83	0.0721242	1.14192	-1.14192	5327	0.176482	chr10	31607227	31610094	31607227	FALSE	FALSE
chr10_3160888_3161107	0.933594	0.947266	0.0136719	16258.5	0.191484	17507	392	81	0.00664359	2.1776	2.1776	17489	0.0250149	chr10	3160888	3161107	3160888	TRUE	TRUE
chr10_31892189_31892752	0.0146484	0.0124664	-0.00218201	8326.5	-0.109029	5914	405	83	0.117505	0.929943	-0.929943	5882	0.254488	chr10	31892189	31892752	31892189	FALSE	FALSE
chr10_32048716_32049423	0.026062	0.0211639	-0.00489807	7082	-0.067151	7494	408	83	0.334778	0.475243	-0.475243	7472	0.528167	chr10	32048716	32049423	32048716	FALSE	FALSE
chr10_32217353_32218392	0.012001	0.0134506	0.00144958	13189	0.0945577	15450	402	82	0.177067	0.751863	0.751863	15461	0.343038	chr10	32217353	32218392	32217353	FALSE	FALSE
chr10_32344550_32345570	0.00677872	0.00840759	0.00162888	13434.5	0.122791	16321	407	83	0.0777755	1.10916	1.10916	16342	0.187084	chr10	32344550	32345570	32344550	FALSE	FALSE
chr10_32635217_32636655	0.00681686	0.00821686	0.00139999	13124	0.148882	16892	408	82	0.0333073	1.47746	1.47746	16899	0.096155	chr10	32635217	32636655	32635217	FALSE	FALSE
chr10_33246271_33247707	0.0280914	0.0249481	-0.00314331	7794.5	-0.0555392	8001	410	83	0.424875	0.371739	-0.371739	7974	0.616469	chr10	33246271	33247707	33246271	FALSE	FALSE
chr10_3360014_3360948	0.897461	0.875	-0.0224609	4874	-0.164498	4309	401	83	0.0182805	1.73801	-1.73801	4279	0.0585576	chr10	3360014	3360948	3360014	TRUE	TRUE
chr10_33623120_33626197	0.0627441	0.0556335	-0.0071106	6536.5	-0.0454893	8527.5	410	83	0.513423	0.289525	-0.289525	8510	0.689174	chr10	33623120	33626197	33623120	FALSE	FALSE
chr10_346504_346828	0.924805	0.929688	0.00488281	15168	0.12903	16494	285	53	0.134678	0.870703	0.870703	15817	0.281158	chr10	346504	346828	346504	TRUE	TRUE
chr10_35103124_35105243	0.0487366	0.048584	-0.000152588	10620	-0.00693506	10473	410	83	0.920921	0.0357777	-0.0357777	10470	0.960444	chr10	35103124	35105243	35103124	FALSE	FALSE
chr10_35378834_35379632	0.034729	0.0333862	-0.00134277	9031.5	-0.121569	5471	410	83	0.0805993	1.09367	-1.09367	5429	0.192107	chr10	35378834	35379632	35378834	FALSE	FALSE
chr10_35415788_35416685	0.00631714	0.00602341	-0.000293732	10357.5	0.0132411	11556	404	83	0.849398	0.070889	0.070889	11563	0.918325	chr10	35415788	35416685	35415788	FALSE	FALSE
chr10_35625049_35626540	0.0103073	0.0121994	0.00189209	13687	0.0379754	12889	408	83	0.585563	0.232427	0.232427	12893	0.746334	chr10	35625049	35626540	35625049	FALSE	FALSE
chr10_35896518_35897461	0.628418	0.646973	0.0185547	16572.5	-0.0172344	9929	399	81	0.807037	0.0931065	-0.0931065	9936	0.894448	chr10	35896518	35897461	35896518	FALSE	TRUE
chr10_35928501_35931893	0.173096	0.193604	0.0205078	16672	0.0122249	11510	409	82	0.861555	0.0647168	0.0647168	11508	0.925632	chr10	35928501	35931893	35928501	FALSE	TRUE
chr10_3598475_3598930	0.926758	0.924316	-0.00244141	8178.5	0.0364377	12812	386	77	0.613794	0.211978	0.211978	12755	0.767385	chr10	3598475	3598930	3598475	TRUE	TRUE
chr10_367469_369416	0.932129	0.928223	-0.00390625	7452	-0.106808	6006	388	77	0.138645	0.858096	-0.858096	6091	0.287069	chr10	367469	369416	367469	TRUE	TRUE
chr10_37414145_37414769	0.908203	0.771973	-0.13623	1917.5	-0.382618	757	379	81	6.38396e-08	7.19491	-7.19491	777	1.25773e-06	chr10	37414145	37414769	37414145	FALSE	TRUE
chr10_37969136_37970350	0.769531	0.536133	-0.233398	763	-0.40565	571	395	82	7.32718e-09	8.13506	-8.13506	564	2.01293e-07	chr10	37969136	37970350	37969136	FALSE	TRUE
chr10_3823789_3824017	0.426025	0.0293884	-0.396729	81.5	-0.447411	296	387	81	2.37194e-10	9.6249	-9.6249	301	1.21423e-08	chr10	3823789	3824017	3823789	TRUE	FALSE
chr10_38265075_38265723	0.00524139	0.00705719	0.0018158	13620	0.0904268	15295	400	82	0.196697	0.706202	0.706202	15291	0.368532	chr10	38265075	38265723	38265075	FALSE	FALSE
chr10_3826853_3828126	0.00819397	0.00782013	-0.00037384	10244.5	-0.0349398	9031	400	83	0.616454	0.210099	-0.210099	9017	0.76948	chr10	3826853	3828126	3826853	TRUE	FALSE
chr10_38299490_38300099	0.0165863	0.0170898	0.00050354	11818.5	-0.0101946	10318	403	83	0.883988	0.0535536	-0.0535536	10316	0.938592	chr10	38299490	38300099	38299490	FALSE	FALSE
chr10_38645112_38645513	0.0130997	0.0177765	0.00467682	15120	0.0090286	11342	399	83	0.897266	0.0470788	0.0470788	11346	0.947002	chr10	38645112	38645513	38645112	FALSE	FALSE
chr10_38691424_38692162	0.0187988	0.0173492	-0.00144958	8944	0.00326429	11030.5	406	83	0.962939	0.0164012	0.0164012	11032	0.980951	chr10	38691424	38692162	38691424	FALSE	FALSE
chr10_387294_387544	0.909668	0.902344	-0.00732422	6489	-0.0727318	7259	389	82	0.300586	0.522032	-0.522032	7259	0.492848	chr10	387294	387544	387294	TRUE	FALSE
chr10_38739405_38739704	0.78125	0.65332	-0.12793	2044.5	-0.446959	300	410	83	1.31932e-10	9.87965	-9.87965	276	7.35676e-09	chr10	38739405	38739704	38739405	FALSE	TRUE
chr10_38893386_38894333	0.706543	0.623535	-0.0830078	2893	-0.271232	2243	408	83	9.73481e-05	4.01167	-4.01167	2187	0.000664207	chr10	38893386	38894333	38893386	FALSE	TRUE
chr10_39023094_39024088	0.751953	0.594727	-0.157227	1597	-0.433617	362	410	83	4.5717e-10	9.33992	-9.33992	336	2.10974e-08	chr10	39023094	39024088	39023094	FALSE	TRUE
chr10_391382_394008	0.947266	0.946777	-0.000488281	10074.5	-0.0374669	8900	410	83	0.590427	0.228834	-0.228834	8881	0.749982	chr10	391382	394008	391382	TRUE	TRUE
chr10_413851_414165	0.90332	0.910645	0.00732422	15614.5	0.0884711	15225	338	62	0.268206	0.571532	0.571532	14768	0.456371	chr10	413851	414165	413851	TRUE	TRUE
chr10_422180_422411	0.9375	0.938477	0.000976562	12547.5	0.0160065	11696	385	80	0.821943	0.085158	0.085158	11689	0.90227	chr10	422180	422411	422180	TRUE	TRUE
chr10_42644821_42646412	0.674316	0.599609	-0.074707	3091	-0.311156	1629	408	83	7.79222e-06	5.10834	-5.10834	1570	7.47926e-05	chr10	42644821	42646412	42644821	FALSE	TRUE
chr10_42672509_42673432	0.275635	0.190796	-0.0848389	2857.5	-0.289274	1949	410	83	3.20918e-05	4.49361	-4.49361	1897	0.000253487	chr10	42672509	42673432	42672509	FALSE	TRUE
chr10_42737286_42739108	0.486084	0.387451	-0.0986328	2584.5	-0.236056	2811	410	83	0.000691184	3.16041	-3.16041	2748	0.00365613	chr10	42737286	42739108	42737286	FALSE	TRUE
chr10_42971195_42971834	0.195312	0.0601807	-0.135132	1932	-0.411561	525	401	83	3.53098e-09	8.4521	-8.4521	491	1.12895e-07	chr10	42971195	42971834	42971195	FALSE	FALSE
chr10_43133523_43134150	0.00478745	0.00419235	-0.000595093	9899	-0.00904503	10361	389	81	0.898145	0.0466533	-0.0466533	10363	0.94745	chr10	43133523	43134150	43133523	FALSE	FALSE
chr10_43248523_43250912	0.247681	0.265869	0.0181885	16546	0.0672054	14316	410	83	0.334194	0.476002	0.476002	14339	0.527755	chr10	43248523	43250912	43248523	FALSE	TRUE
chr10_43277849_43278532	0.0151443	0.0141983	-0.000946045	9482.5	-0.0450989	8542	405	83	0.517467	0.286117	-0.286117	8525	0.692717	chr10	43277849	43278532	43277849	FALSE	FALSE
chr10_43332387_43332817	0.406982	0.515625	0.108643	18130.5	0.0925097	15378	401	83	0.184532	0.733929	0.733929	15395	0.35263	chr10	43332387	43332817	43332387	FALSE	FALSE
chr10_43361552_43362350	0.130859	0.0917969	-0.0390625	4122.5	-0.217785	3159	394	83	0.0018107	2.74215	-2.74215	3114	0.00832316	chr10	43361552	43362350	43361552	FALSE	TRUE
chr10_43393476_43394417	0.666504	0.463867	-0.202637	1056.5	-0.386943	711	399	82	3.36424e-08	7.47311	-7.47311	705	7.33788e-07	chr10	43393476	43394417	43393476	FALSE	TRUE
chr10_43428167_43429460	0.450928	0.320801	-0.130127	1998	-0.238433	2765	408	82	0.000653107	3.18502	-3.18502	2727	0.00348027	chr10	43428167	43429460	43428167	FALSE	TRUE
chr10_43571939_43573434	0.0842896	0.104187	0.0198975	16637	0.100073	15655	403	82	0.153045	0.815182	0.815182	15657	0.308482	chr10	43571939	43573434	43571939	FALSE	TRUE
chr10_43600146_43601165	0.331543	0.139893	-0.19165	1170.5	-0.293328	1887	397	82	2.86882e-05	4.5423	-4.5423	1862	0.000230688	chr10	43600146	43601165	43600146	FALSE	TRUE
chr10_43632966_43634222	0.00767517	0.00714493	-0.000530243	9994.5	0.00262195	11000	400	82	0.970484	0.0130115	0.0130115	11001	0.985208	chr10	43632966	43634222	43632966	FALSE	FALSE
chr10_43724528_43725613	0.106323	0.0909424	-0.0153809	5377	-0.0890849	6617	403	81	0.20571	0.686745	-0.686745	6618	0.380587	chr10	43724528	43725613	43724528	FALSE	TRUE
chr10_43818074_43818604	0.291992	0.390625	0.0986328	18061	0.0975515	15567	403	83	0.161549	0.791696	0.791696	15585	0.320905	chr10	43818074	43818604	43818074	FALSE	TRUE
chr10_43891546_43892917	0.0157166	0.019516	0.00379944	14849.5	0.0781208	14781	407	83	0.26189	0.581881	0.581881	14805	0.448763	chr10	43891546	43892917	43891546	FALSE	FALSE
chr10_43902580_43904792	0.025116	0.0212708	-0.00384521	7492.5	-0.0732883	7237	410	83	0.292271	0.534214	-0.534214	7203	0.483788	chr10	43902580	43904792	43902580	FALSE	FALSE
chr10_43931958_43932879	0.00930786	0.00879669	-0.000511169	10022.5	-0.0678456	7461	404	83	0.330152	0.481286	-0.481286	7442	0.52377	chr10	43931958	43932879	43931958	FALSE	FALSE
chr10_43950884_43951437	0.014801	0.0168457	0.00204468	13836	0.0654321	14237	405	82	0.350042	0.455879	0.455879	14238	0.544129	chr10	43950884	43951437	43950884	FALSE	FALSE
chr10_44069359_44070179	0.074646	0.103149	0.0285034	16998	0.150021	16913	401	82	0.0322455	1.49153	1.49153	16913	0.0936222	chr10	44069359	44070179	44069359	FALSE	TRUE
chr10_44101813_44102366	0.0123291	0.0209351	0.00860596	15787.5	0.201691	17613	401	82	0.00397498	2.40067	2.40067	17613	0.0162235	chr10	44101813	44102366	44101813	FALSE	FALSE
chr10_44143856_44144698	0.0336304	0.0374756	0.00384521	14863.5	0.0141162	11610	402	83	0.839793	0.075828	0.075828	11615	0.912943	chr10	44143856	44144698	44143856	FALSE	FALSE
chr10_44162850_44163531	0.67334	0.494629	-0.178711	1325	-0.294358	1871	410	83	2.32474e-05	4.63363	-4.63363	1806	0.000192557	chr10	44162850	44163531	44162850	FALSE	TRUE
chr10_44185039_44186132	0.0579224	0.0870972	0.0291748	17021.5	0.125149	16385	394	81	0.0759835	1.11928	1.11928	16363	0.183741	chr10	44185039	44186132	44185039	FALSE	TRUE
chr10_44198302_44198577	0.697266	0.551758	-0.145508	1763.5	-0.304889	1724	399	83	1.22932e-05	4.91033	-4.91033	1678	0.000110574	chr10	44198302	44198577	44198302	FALSE	TRUE
chr10_44879714_44882391	0.254883	0.240845	-0.0140381	5500.5	-0.10733	5994	404	83	0.123421	0.908613	-0.908613	5957	0.263462	chr10	44879714	44882391	44879714	FALSE	TRUE
chr10_45360174_45360526	0.0259705	0.0403137	0.0143433	16311.5	0.244986	17998	397	81	0.00050787	3.29425	3.29425	17989	0.00281106	chr10	45360174	45360526	45360174	FALSE	FALSE
chr10_45496275_45496550	0.0269165	0.02005	-0.00686646	6575	-0.086996	6685	389	82	0.215496	0.66656	-0.66656	6682	0.393523	chr10	45496275	45496550	45496275	FALSE	FALSE
chr10_45693718_45694890	0.84668	0.734375	-0.112305	2306.5	-0.219346	3122	382	81	0.00192056	2.71657	-2.71657	3133	0.00876366	chr10	45693718	45694890	45693718	FALSE	TRUE
chr10_45868718_45870156	0.0469055	0.0777588	0.0308533	17072	0.15924	17074	399	82	0.0230854	1.63666	1.63666	17074	0.0712803	chr10	45868718	45870156	45868718	FALSE	TRUE
chr10_45914374_45914883	0.474121	0.226074	-0.248047	637	-0.194531	3664	392	82	0.00558314	2.25312	-2.25312	3642	0.0216351	chr10	45914374	45914883	45914374	FALSE	FALSE
chr10_45922831_45923375	0.839355	0.712891	-0.126465	2075.5	-0.375097	828	387	80	1.2653e-07	6.89781	-6.89781	863	2.24707e-06	chr10	45922831	45923375	45922831	FALSE	TRUE
chr10_45938626_45939679	0.789062	0.619629	-0.169434	1428.5	-0.354104	1061	407	83	3.63978e-07	6.43892	-6.43892	1009	5.50321e-06	chr10	45938626	45939679	45938626	FALSE	FALSE
chr10_46089871_46090462	0.00667191	0.00681686	0.000144958	11180.5	-0.00038884	10831	381	81	0.995899	0.00178483	-0.00178483	10831	0.998316	chr10	46089871	46090462	46089871	FALSE	FALSE
chr10_46167677_46168642	0.0450439	0.0569458	0.0119019	16109	0.111328	16018	408	83	0.109739	0.959638	0.959638	16037	0.242062	chr10	46167677	46168642	46167677	FALSE	FALSE
chr10_46222416_46223287	0.00924683	0.0103531	0.00110626	12742	0.0796421	14851	408	83	0.252596	0.597574	0.597574	14884	0.438889	chr10	46222416	46223287	46222416	FALSE	FALSE
chr10_465928_466396	0.920898	0.916016	-0.00488281	7104	-0.0747047	7173	381	80	0.293459	0.532453	-0.532453	7215	0.484811	chr10	465928	466396	465928	TRUE	TRUE
chr10_46640671_46641230	0.555664	0.467773	-0.0878906	2799.5	-0.234164	2842	404	83	0.000774881	3.11077	-3.11077	2797	0.00402165	chr10	46640671	46641230	46640671	FALSE	TRUE
chr10_46762450_46763143	0.0195618	0.0175171	-0.00204468	8419.5	0.035554	12763.5	408	83	0.609598	0.214956	0.214956	12781	0.764842	chr10	46762450	46763143	46762450	FALSE	TRUE
chr10_46774348_46775241	0.894043	0.82666	-0.0673828	3286	-0.25383	2498	398	82	0.000293431	3.53249	-3.53249	2484	0.00173759	chr10	46774348	46775241	46774348	FALSE	TRUE
chr10_46913769_46914016	0.00300217	0	-0.00300217	7853	-0.16564	4284	388	82	0.0127549	1.89432	-1.89432	4077	0.0433477	chr10	46913769	46914016	46913769	FALSE	TRUE
chr10_46969991_46971557	0.527344	0.343994	-0.18335	1265.5	-0.368233	898	410	82	1.39026e-07	6.8569	-6.8569	873	2.43245e-06	chr10	46969991	46971557	46969991	FALSE	FALSE
chr10_46992447_46993295	0.218994	0.280518	0.0615234	17686.5	0.104731	15819	410	83	0.132283	0.878495	0.878495	15835	0.277264	chr10	46992447	46993295	46992447	FALSE	TRUE
chr10_47243187_47243880	0.0228271	0.0251007	0.00227356	14034.5	0.0889735	15243.5	408	83	0.201177	0.696422	0.696422	15259	0.374603	chr10	47243187	47243880	47243187	FALSE	TRUE
chr10_47254936_47256041	0.890137	0.822754	-0.0673828	3286	-0.309604	1653	398	81	1.11121e-05	4.95421	-4.95421	1657	0.000101312	chr10	47254936	47256041	47254936	FALSE	TRUE
chr10_47395840_47396088	0.00640869	0.00546265	-0.000946045	9482.5	-0.0352744	9007	400	82	0.612982	0.212552	-0.212552	8997	0.767088	chr10	47395840	47396088	47395840	FALSE	FALSE
chr10_47655677_47656379	0.0185547	0.0171356	-0.00141907	8971	0.0144277	11627	400	83	0.836265	0.077656	0.077656	11635	0.911052	chr10	47655677	47656379	47655677	FALSE	FALSE
chr10_48173311_48174416	0.890137	0.823242	-0.0668945	3298.5	-0.301385	1764	397	80	2.0932e-05	4.67919	-4.67919	1781	0.00017642	chr10	48173311	48174416	48173311	FALSE	TRUE
chr10_48185469_48186162	0.0207214	0.0211029	0.00038147	11575.5	0.0240373	12143	408	83	0.73003	0.136659	0.136659	12155	0.847535	chr10	48185469	48186162	48185469	FALSE	TRUE
chr10_48354459_48355197	0.00492477	0.00350761	-0.00141716	8977	-0.0700641	7369	391	81	0.314382	0.502542	-0.502542	7349	0.507038	chr10	48354459	48355197	48354459	FALSE	FALSE
chr10_48428667_48429470	0.833008	0.540039	-0.292969	357	-0.490585	131	396	81	3.39678e-12	11.4689	-11.4689	133	3.83386e-10	chr10	48428667	48429470	48428667	FALSE	TRUE
chr10_48438411_48439320	0.35791	0.111267	-0.246582	650.5	-0.326217	1415	399	81	3.63752e-06	5.43919	-5.43919	1408	3.91897e-05	chr10	48438411	48439320	48438411	FALSE	TRUE
chr10_4868125_4868949	0.204712	0.161499	-0.0432129	3961	-0.0914146	6529	393	81	0.195031	0.709897	-0.709897	6538	0.366619	chr10	4868125	4868949	4868125	TRUE	TRUE
chr10_48827592_48828126	0.572754	0.444092	-0.128662	2033	-0.251461	2537	404	83	0.000306253	3.51392	-3.51392	2497	0.00180325	chr10	48827592	48828126	48827592	FALSE	TRUE
chr10_48952215_48952880	0.0189514	0.0182495	-0.000701904	9754.5	0.0426275	13117	407	83	0.540387	0.267295	0.267295	13128	0.710933	chr10	48952215	48952880	48952215	FALSE	TRUE
chr10_48964083_48964976	0.888184	0.831055	-0.0571289	3554	-0.278164	2133	399	80	8.54757e-05	4.06816	-4.06816	2147	0.000592918	chr10	48964083	48964976	48964083	FALSE	TRUE
chr10_49348137_49348676	0.613281	0.48999	-0.123291	2133	-0.279799	2101	403	83	5.92017e-05	4.22767	-4.22767	2052	0.000431932	chr10	49348137	49348676	49348137	FALSE	TRUE
chr10_49514331_49515400	0.00915527	0.00951385	0.000358582	11529	0.0234067	12112	394	81	0.74006	0.130733	0.130733	12103	0.854539	chr10	49514331	49515400	49514331	FALSE	FALSE
chr10_49658224_49659201	0.915039	0.927734	0.0126953	16189	0.0583624	13920	392	82	0.405893	0.391588	0.391588	13915	0.598946	chr10	49658224	49659201	49658224	FALSE	TRUE
chr10_49674243_49674776	0.728027	0.748047	0.0200195	16646.5	-0.00602779	10522	383	81	0.932403	0.0303962	-0.0303962	10524	0.966341	chr10	49674243	49674776	49674243	FALSE	TRUE
chr10_49731448_49732638	0.0990601	0.1521	0.0530396	17561.5	0.113259	16076	407	83	0.103789	0.98385	0.98385	16097	0.232434	chr10	49731448	49732638	49731448	FALSE	TRUE
chr10_49812852_49813352	0.0540466	0.0306091	-0.0234375	4807.5	-0.189103	3772	389	82	0.00709286	2.14918	-2.14918	3760	0.0264356	chr10	49812852	49813352	49812852	FALSE	TRUE
chr10_49863620_49864601	0.0482178	0.0337524	-0.0144653	5462.5	-0.247282	2612	410	83	0.000378812	3.42158	-3.42158	2558	0.00216822	chr10	49863620	49864601	49863620	FALSE	FALSE
chr10_50323184_50323735	0.285645	0.1875	-0.0981445	2593.5	-0.178153	4000	365	77	0.0139907	1.85416	-1.85416	4130	0.046809	chr10	50323184	50323735	50323184	FALSE	TRUE
chr10_50602989_50606783	0.299072	0.200195	-0.098877	2579.5	-0.265767	2331	409	83	0.000133794	3.87356	-3.87356	2280	0.000872221	chr10	50602989	50606783	50602989	FALSE	TRUE
chr10_50746634_50747329	0.00476074	0.00796509	0.00320435	14621.5	0.057872	13897	389	82	0.40484	0.392717	0.392717	13922	0.597957	chr10	50746634	50747329	50746634	FALSE	FALSE
chr10_50817601_50820356	0.437988	0.227173	-0.210815	973.5	-0.280887	2083	405	83	5.50035e-05	4.25961	-4.25961	2021	0.000406848	chr10	50817601	50820356	50817601	FALSE	TRUE
chr10_50822350_50822666	0.280518	0.199829	-0.0806885	2951	-0.217198	3175	390	82	0.00198217	2.70286	-2.70286	3147	0.00900749	chr10	50822350	50822666	50822350	FALSE	TRUE
chr10_50969658_50970605	0.333984	0.248901	-0.085083	2851	-0.194896	3652	403	81	0.00562297	2.25003	-2.25003	3646	0.0217714	chr10	50969658	50970605	50969658	FALSE	FALSE
chr10_50976347_50977137	0.719238	0.406006	-0.313232	285	-0.55074	26	402	83	2.71199e-15	14.5667	-14.5667	21	1.97288e-12	chr10	50976347	50977137	50976347	FALSE	TRUE
chr10_51370811_51371710	0.00575638	0.00611877	0.000362396	11535	0.0262521	12257	408	83	0.705974	0.151211	0.151211	12266	0.831228	chr10	51370811	51371710	51370811	FALSE	TRUE
chr10_51565071_51565648	0.324219	0.307617	-0.0166016	5285	-0.0890979	6613.5	410	83	0.200396	0.69811	-0.69811	6581	0.373411	chr10	51565071	51565648	51565071	FALSE	FALSE
chr10_51572198_51572620	0.0131683	0.00817871	-0.00498962	7055	-0.181046	3943	389	82	0.00960204	2.01764	-2.01764	3917	0.0341309	chr10	51572198	51572620	51572198	FALSE	FALSE
chr10_51623044_51623943	0.00526428	0.00568008	0.000415802	11634.5	0.0403083	12998	408	83	0.562354	0.24999	0.24999	13009	0.727835	chr10	51623044	51623943	51623044	FALSE	TRUE
chr10_51827416_51828287	0.00952148	0.0122375	0.00271606	14351	0.126091	16406	406	83	0.0701618	1.1539	1.1539	16430	0.172966	chr10	51827416	51828287	51827416	FALSE	FALSE
chr10_52177724_52178182	0.00735474	0.0113602	0.00400543	14925.5	0.0322591	12591	385	81	0.646507	0.189427	0.189427	12588	0.791021	chr10	52177724	52178182	52177724	FALSE	FALSE
chr10_52382472_52385155	0.0088501	0.0112839	0.00243378	14147.5	0.155654	17013.5	409	83	0.0253021	1.59684	1.59684	17036	0.0769079	chr10	52382472	52385155	52382472	FALSE	FALSE
chr10_52499392_52500021	0.0222473	0.0222168	-3.05176e-05	10820.5	0.0122549	11511	408	83	0.860549	0.0652246	0.0652246	11512	0.924921	chr10	52499392	52500021	52499392	FALSE	FALSE
chr10_525719_526041	0.871582	0.90918	0.0375977	17269.5	0.1771	17324	376	78	0.0137567	1.86149	1.86149	17273	0.0461579	chr10	525719	526041	525719	TRUE	TRUE
chr10_52750956_52751765	0.0410461	0.0381165	-0.00292969	7908	-0.051901	8185	402	81	0.461152	0.336156	-0.336156	8187	0.647735	chr10	52750956	52751765	52750956	FALSE	FALSE
chr10_52833539_52834752	0.0346069	0.0248413	-0.00976562	6002.5	-0.129984	5218	407	83	0.061899	1.20832	-1.20832	5183	0.157168	chr10	52833539	52834752	52833539	FALSE	FALSE
chr10_53459251_53459759	0.00378036	0.00229836	-0.00148201	8883	-0.139594	4948	388	80	0.0484039	1.31512	-1.31512	4973	0.129263	chr10	53459251	53459759	53459251	FALSE	FALSE
chr10_54073989_54074827	0.0662231	0.0499573	-0.0162659	5308.5	-0.210373	3305	410	83	0.0024959	2.60277	-2.60277	3241	0.0109696	chr10	54073989	54074827	54073989	FALSE	FALSE
chr10_5454431_5454779	0.00718307	0.00685501	-0.000328064	10314.5	0.0141726	11614	397	83	0.839307	0.076079	0.076079	11616	0.912721	chr10	5454431	5454779	5454431	TRUE	FALSE
chr10_5540785_5541515	0.818848	0.709473	-0.109375	2363.5	-0.319354	1506	383	80	6.97185e-06	5.15665	-5.15665	1546	6.79982e-05	chr10	5540785	5541515	5540785	TRUE	TRUE
chr10_5567122_5567828	0.882324	0.818359	-0.0639648	3375	-0.261673	2391	393	80	0.000223527	3.65067	-3.65067	2411	0.00136908	chr10	5567122	5567828	5567122	TRUE	FALSE
chr10_5707980_5708798	0.0099411	0.0126953	0.00275421	14374	0.0313438	12539	399	81	0.656588	0.182707	0.182707	12531	0.797702	chr10	5707980	5708798	5707980	TRUE	FALSE
chr10_5726455_5727697	0.015152	0.0174255	0.00227356	14034.5	0.0642965	14180.5	407	83	0.355833	0.448753	0.448753	14204	0.549699	chr10	5726455	5727697	5726455	TRUE	FALSE
chr10_57390343_57391215	0.320312	0.0837402	-0.236572	733	-0.267772	2294	398	82	0.00013348	3.87458	-3.87458	2277	0.000871385	chr10	57390343	57391215	57390343	FALSE	TRUE
chr10_5854706_5855965	0.0411987	0.0385437	-0.00265503	8068	-0.186453	3832	410	83	0.00736285	2.13295	-2.13295	3788	0.0272252	chr10	5854706	5855965	5854706	TRUE	FALSE
chr10_5930914_5932389	0.011322	0.0151443	0.00382233	14856	0.172967	17265	407	83	0.012971	1.88703	1.88703	17292	0.0439465	chr10	5930914	5932389	5930914	TRUE	FALSE
chr10_60027007_60029241	0.0420532	0.0278168	-0.0142365	5474	-0.205856	3399	409	82	0.00324437	2.48887	-2.48887	3365	0.013703	chr10	60027007	60029241	60027007	FALSE	FALSE
chr10_60094731_60095306	0.0137939	0.0118103	-0.00198364	8458	-0.0832674	6816	401	82	0.234618	0.629639	-0.629639	6808	0.417693	chr10	60094731	60095306	60094731	FALSE	FALSE
chr10_60144723_60145335	0.00602722	0.00749588	0.00146866	13244	0.0791175	14821	399	81	0.261182	0.583057	0.583057	14808	0.447877	chr10	60144723	60145335	60144723	FALSE	FALSE
chr10_6018944_6020073	0.0665283	0.0741577	0.00762939	15657.5	0.127828	16466	410	83	0.0661803	1.17927	1.17927	16490	0.165769	chr10	6018944	6020073	6018944	TRUE	FALSE
chr10_60272467_60273456	0.0663452	0.0269928	-0.0393677	4114	-0.377082	808	403	83	6.21759e-08	7.20638	-7.20638	774	1.23012e-06	chr10	60272467	60273456	60272467	FALSE	FALSE
chr10_60935827_60937049	0.506836	0.273438	-0.233398	763	-0.146799	4728	400	82	0.0361827	1.4415	-1.4415	4714	0.102933	chr10	60935827	60937049	60935827	FALSE	FALSE
chr10_61122306_61122536	0.0176392	0.0168915	-0.000747681	9692	-0.049339	8307	393	82	0.482131	0.316835	-0.316835	8317	0.664458	chr10	61122306	61122536	61122306	FALSE	FALSE
chr10_6130786_6131774	0.00814819	0.00841522	0.000267029	11375	0.021873	12030.5	401	83	0.753935	0.122666	0.122666	12042	0.863521	chr10	6130786	6131774	6130786	TRUE	FALSE
chr10_61468610_61469999	0.0551147	0.0718994	0.0167847	16465	0.0704806	14470	408	82	0.313807	0.503338	0.503338	14478	0.506662	chr10	61468610	61469999	61468610	FALSE	FALSE
chr10_61665656_61666794	0.0117493	0.00980377	-0.0019455	8516.5	0.00157279	10933	406	83	0.982316	0.00774883	0.00774883	10934	0.990863	chr10	61665656	61666794	61665656	FALSE	FALSE
chr10_6186520_6187855	0.0596008	0.049469	-0.0101318	5954	-0.048401	8360	405	83	0.487279	0.312222	-0.312222	8345	0.668889	chr10	6186520	6187855	6186520	TRUE	FALSE
chr10_6205499_6206211	0.0250854	0.0383606	0.0132751	16232	0.199002	17586	408	83	0.00424744	2.37187	2.37187	17597	0.0171509	chr10	6205499	6206211	6205499	TRUE	FALSE
chr10_6242975_6246457	0.0342407	0.0509338	0.0166931	16461	0.100411	15664	410	83	0.149003	0.826804	0.826804	15693	0.30279	chr10	6242975	6246457	6242975	TRUE	FALSE
chr10_62492785_62493376	0.021347	0.069458	0.0480957	17494.5	0.363728	18526	396	83	1.8235e-07	6.73909	6.73909	18528	3.05046e-06	chr10	62492785	62493376	62492785	FALSE	FALSE
chr10_62537970_62538862	0.00987244	0.011879	0.00200653	13804.5	0.0908656	15311	408	82	0.193974	0.712257	0.712257	15316	0.365182	chr10	62537970	62538862	62537970	FALSE	FALSE
chr10_62703307_62704290	0.0133667	0.0104294	-0.00293732	7886.5	-0.118902	5548	408	82	0.0892098	1.04959	-1.04959	5530	0.207683	chr10	62703307	62704290	62703307	FALSE	FALSE
chr10_62761163_62761595	0.0459595	0.0501709	0.00421143	14978.5	-0.00474255	10606	396	82	0.946421	0.0239158	-0.0239158	10605	0.972743	chr10	62761163	62761595	62761163	FALSE	FALSE
chr10_63422538_63423105	0.050354	0.0678101	0.0174561	16508	0.0271434	12311	388	79	0.703904	0.152486	0.152486	12279	0.829821	chr10	63422538	63423105	63422538	FALSE	FALSE
chr10_63662886_63663299	0.0196075	0.021759	0.00215149	13941.5	0.0425261	13109	383	80	0.547873	0.26132	0.26132	13091	0.716965	chr10	63662886	63663299	63662886	FALSE	FALSE
chr10_64028041_64028706	0.0171051	0.0142212	-0.00288391	7935.5	0.00831075	11298	405	82	0.905812	0.0429618	0.0429618	11297	0.951359	chr10	64028041	64028706	64028041	FALSE	FALSE
chr10_64133789_64134420	0.0532837	0.0287018	-0.0245819	4743	-0.372852	843	398	81	1.20838e-07	6.9178	-6.9178	857	2.1613e-06	chr10	64133789	64134420	64133789	FALSE	TRUE
chr10_64564435_64565818	0.013649	0.0139084	0.000259399	11360	-0.021752	9684	406	83	0.755028	0.122037	-0.122037	9672	0.863784	chr10	64564435	64565818	64564435	FALSE	FALSE
chr10_64573171_64573486	0.947754	0.957031	0.00927734	15866	0.0911607	15321	388	81	0.196673	0.706256	0.706256	15293	0.368532	chr10	64573171	64573486	64573171	FALSE	TRUE
chr10_64574660_64578778	0.148682	0.127563	-0.0211182	4938	-0.190061	3751	409	83	0.00630916	2.20003	-2.20003	3700	0.0239707	chr10	64574660	64578778	64574660	FALSE	TRUE
chr10_65224870_65225887	0.00668716	0.00717163	0.000484467	11752.5	-0.0132189	10159	405	82	0.850507	0.0703222	-0.0703222	10158	0.918878	chr10	65224870	65225887	65224870	FALSE	FALSE
chr10_65280870_65282030	0.0174561	0.0176086	0.000152588	11194.5	0.00457317	11105	408	82	0.948205	0.0230975	0.0230975	11106	0.973742	chr10	65280870	65282030	65280870	FALSE	FALSE
chr10_65389875_65390835	0.0204773	0.0213928	0.000915527	12451	-0.0227212	9626	403	83	0.74463	0.12806	-0.12806	9613	0.857783	chr10	65389875	65390835	65389875	FALSE	FALSE
chr10_6621907_6622642	0.0322571	0.0246429	-0.00761414	6437	-0.110553	5861	398	83	0.112947	0.947124	-0.947124	5829	0.247333	chr10	6621907	6622642	6621907	TRUE	FALSE
chr10_66813635_66814061	0.861328	0.837891	-0.0234375	4807.5	-0.138922	4968	378	80	0.0508191	1.29397	-1.29397	5012	0.134522	chr10	66813635	66814061	66813635	FALSE	TRUE
chr10_678262_679515	0.91748	0.918457	0.000976562	12547.5	0.0249699	12198	400	83	0.720514	0.142358	0.142358	12202	0.8413	chr10	678262	679515	678262	TRUE	TRUE
chr10_685033_685407	0.898438	0.899902	0.00146484	13222.5	-0.0349356	9032	376	81	0.622018	0.206197	-0.206197	9038	0.773836	chr10	685033	685407	685033	TRUE	TRUE
chr10_69644169_69645178	0.0109787	0.0107498	-0.000228882	10478	0.0277581	12353	408	83	0.690294	0.160966	0.160966	12358	0.820766	chr10	69644169	69645178	65889569	FALSE	FALSE
chr10_69834413_69835233	0.0276794	0.0322876	0.00460815	15102	0.098568	15600	403	83	0.157215	0.803506	0.803506	15620	0.314504	chr10	69834413	69835233	65699514	FALSE	FALSE
chr10_69990893_69991523	0.0118561	0.00740433	-0.00445175	7237	-0.0959636	6358	397	82	0.171132	0.766669	-0.766669	6348	0.334935	chr10	69990893	69991523	65543224	FALSE	FALSE
chr10_70091055_70092573	0.0184021	0.018158	-0.000244141	10450.5	-0.00906567	10360	408	83	0.896683	0.0473613	-0.0473613	10358	0.946698	chr10	70091055	70092573	65442174	FALSE	FALSE
chr10_70166206_70167342	0.0128479	0.00993347	-0.00291443	7929	-0.0900647	6578	406	83	0.195893	0.70798	-0.70798	6545	0.367577	chr10	70166206	70167342	65367405	FALSE	FALSE
chr10_70231396_70231797	0.00990295	0.00937653	-0.000526428	10001	-0.0236157	9585	401	83	0.734974	0.133728	-0.133728	9574	0.851122	chr10	70231396	70231797	65302950	FALSE	FALSE
chr10_70286960_70287396	0.00460434	0.00532532	0.000720978	12132.5	0.0582521	13917	403	82	0.404956	0.392592	0.392592	13921	0.598032	chr10	70286960	70287396	65247351	FALSE	FALSE
chr10_70320130_70320822	0.0447083	0.0317383	-0.01297	5617	-0.250337	2555	398	82	0.000355382	3.4493	-3.4493	2535	0.00205044	chr10	70320130	70320822	65213925	FALSE	FALSE
chr10_70480704_70481598	0.0067749	0.00645447	-0.000320435	10322.5	-0.0561956	7966	398	82	0.422519	0.374153	-0.374153	7957	0.614478	chr10	70480704	70481598	65053149	FALSE	FALSE
chr10_70586917_70588209	0.0156555	0.0223236	0.00666809	15509.5	0.0901073	15279	403	83	0.195971	0.707808	0.707808	15296	0.367648	chr10	70586917	70588209	64946538	FALSE	FALSE
chr10_70660525_70661473	0.0245972	0.0213623	-0.00323486	7750.5	-0.0786811	6999	405	82	0.261052	0.583273	-0.583273	6995	0.447777	chr10	70660525	70661473	64873274	FALSE	FALSE
chr10_70715938_70716494	0.0059433	0.00644684	0.00050354	11818.5	0.0356079	12770	406	81	0.612899	0.212611	0.212611	12763	0.767088	chr10	70715938	70716494	64818253	FALSE	FALSE
chr10_70748435_70749334	0.0076828	0.0131607	0.00547791	15316	0.0811899	14934	403	82	0.245651	0.609682	0.609682	14936	0.430782	chr10	70748435	70749334	64785413	FALSE	FALSE
chr10_70883663_70884353	0.0427856	0.0409546	-0.00183105	8596	-0.0168969	9952	410	83	0.808407	0.09237	-0.09237	9942	0.894824	chr10	70883663	70884353	64650394	FALSE	FALSE
chr10_70939896_70940304	0.0058136	0.00749207	0.00167847	13490.5	0.119387	16225	396	83	0.086507	1.06295	1.06295	16248	0.20298	chr10	70939896	70940304	64594443	FALSE	FALSE
chr10_71077946_71079377	0.0237732	0.0267639	0.00299072	14521	0.156715	17032	409	83	0.0243225	1.61399	1.61399	17051	0.0743888	chr10	71077946	71079377	64455370	FALSE	FALSE
chr10_71211116_71211780	0.0606384	0.110352	0.0497131	17514	0.317573	18365	410	83	4.99723e-06	5.30127	5.30127	18379	5.13312e-05	chr10	71211116	71211780	64322967	FALSE	FALSE
chr10_71331926_71333392	0.286377	0.112793	-0.173584	1371.5	-0.365333	930	406	83	1.54512e-07	6.81104	-6.81104	886	2.66079e-06	chr10	71331926	71333392	64201355	FALSE	TRUE
chr10_71337585_71338675	0.130615	0.0623169	-0.0682983	3265	-0.249478	2564	390	81	0.000408271	3.38905	-3.38905	2581	0.00231518	chr10	71337585	71338675	64196072	FALSE	TRUE
chr10_71389862_71390355	0.0139465	0.0275421	0.0135956	16248	0.239764	17956	389	82	0.000631333	3.19974	3.19974	17953	0.00338445	chr10	71389862	71390355	64144392	FALSE	FALSE
chr10_71561302_71562876	0.0745239	0.0603638	-0.0141602	5487	-0.0813406	6880	409	82	0.244922	0.610973	-0.610973	6880	0.429949	chr10	71561302	71562876	63971871	FALSE	TRUE
chr10_71812318_71813693	0.0333862	0.0368042	0.00341797	14722.5	0.0460806	13302	402	82	0.510804	0.291746	0.291746	13298	0.687183	chr10	71812318	71813693	63721054	FALSE	FALSE
chr10_71892092_71892802	0.0174255	0.0157471	-0.00167847	8715	-0.126302	5321	398	82	0.0715842	1.14518	-1.14518	5319	0.175412	chr10	71892092	71892802	63641945	FALSE	FALSE
chr10_71905215_71906675	0.0179749	0.0202026	0.00222778	14000.5	0.0779711	14776	405	83	0.263006	0.580034	0.580034	14796	0.450017	chr10	71905215	71906675	63628072	FALSE	FALSE
chr10_71930007_71930587	0.00384521	0.00294113	-0.000904083	9529	-0.0641543	7627	399	82	0.352905	0.452343	-0.452343	7572	0.546764	chr10	71930007	71930587	63604160	FALSE	FALSE
chr10_71992414_71993467	0.0098877	0.0088501	-0.0010376	9341.5	-0.0028644	10707	408	83	0.967504	0.0143472	-0.0143472	10706	0.983728	chr10	71992414	71993467	63541280	FALSE	FALSE
chr10_72043446_72043886	0.537109	0.644531	0.107422	18119	0.0764066	14719	391	80	0.281527	0.550479	0.550479	14685	0.47146	chr10	72043446	72043886	63490861	FALSE	FALSE
chr10_7213842_7214103	0.666504	0.569824	-0.0966797	2621	-0.178039	4001	395	83	0.0107484	1.96865	-1.96865	3970	0.0376205	chr10	7213842	7214103	7213842	TRUE	TRUE
chr10_72141560_72142637	0.0175476	0.0198517	0.00230408	14050.5	0.0858583	15118	404	83	0.217798	0.661946	0.661946	15142	0.396489	chr10	72141560	72142637	63392110	FALSE	FALSE
chr10_72163717_72164573	0.0105438	0.00995636	-0.000587463	9913.5	0.0297767	12447	403	82	0.670892	0.173347	0.173347	12444	0.806198	chr10	72163717	72164573	63370174	FALSE	FALSE
chr10_72200065_72201368	0.641602	0.446533	-0.195068	1135.5	-0.286634	1991	406	83	3.84346e-05	4.41528	-4.41528	1942	0.000296708	chr10	72200065	72201368	63333379	FALSE	TRUE
chr10_72218130_72218484	0.11792	0.072876	-0.0450439	3897.5	-0.159728	4407	387	81	0.0237283	1.62473	-1.62473	4423	0.0728927	chr10	72218130	72218484	63316263	FALSE	TRUE
chr10_72237661_72238821	0.0751953	0.083374	0.00817871	15731	0.128245	16473	405	82	0.0669528	1.17423	1.17423	16478	0.167123	chr10	72237661	72238821	63295926	FALSE	TRUE
chr10_72432242_72432738	0.0678711	0.0755615	0.00769043	15667.5	-0.0131394	10163	391	80	0.853368	0.0688639	-0.0688639	10173	0.920425	chr10	72432242	72432738	63102009	FALSE	TRUE
chr10_72575513_72576302	0.0131378	0.00999451	-0.00314331	7794.5	-0.055093	8027	387	81	0.433939	0.362572	-0.362572	8037	0.624062	chr10	72575513	72576302	62958445	FALSE	FALSE
chr10_72647738_72648317	0.0118408	0.0305939	0.0187531	16584	0.347399	18482	402	81	7.86011e-07	6.10457	6.10457	18474	1.04742e-05	chr10	72647738	72648317	62886430	FALSE	FALSE
chr10_72678306_72678570	0.793945	0.413818	-0.380127	104	-0.4881	141	375	80	7.03791e-12	11.1526	-11.1526	160	6.72767e-10	chr10	72678306	72678570	62856177	FALSE	TRUE
chr10_72972075_72973895	0.0211182	0.0247955	0.00367737	14811.5	0.0795357	14842	409	83	0.253154	0.596616	0.596616	14878	0.439419	chr10	72972075	72973895	62560852	FALSE	TRUE
chr10_72977123_72977774	0.0562134	0.0756836	0.0194702	16623.5	0.00219409	10967	375	79	0.975881	0.0106032	0.0106032	10966	0.987423	chr10	72977123	72977774	62556973	FALSE	TRUE
chr10_73078857_73079181	0.0101395	0.00961304	-0.000526428	10001	0.00396241	11067	377	81	0.954993	0.0199999	0.0199999	11072	0.977265	chr10	73078857	73079181	62455566	FALSE	FALSE
chr10_73136971_73137352	0.0147095	0.11969	0.10498	18102.5	0.346372	18478	377	79	1.11578e-06	5.95242	5.95242	18459	1.40871e-05	chr10	73136971	73137352	62397395	FALSE	FALSE
chr10_73156164_73157954	0.178711	0.170776	-0.00793457	6345.5	-0.0817915	6867	407	83	0.240136	0.619544	-0.619544	6846	0.424236	chr10	73156164	73157954	62376793	FALSE	TRUE
chr10_734707_735606	0.020813	0.013649	-0.007164	6527	-0.196329	3617	403	83	0.00483258	2.31582	-2.31582	3571	0.0191019	chr10	734707	735606	734707	TRUE	FALSE
chr10_73533091_73533492	0.01091	0.0312195	0.0203094	16666	0.322481	18398	387	80	5.2415e-06	5.28054	5.28054	18373	5.34012e-05	chr10	73533091	73533492	62001255	FALSE	FALSE
chr10_73610661_73611145	0.00997925	0.0102005	0.000221252	11295.5	0.0168662	11746	396	81	0.810976	0.0909919	0.0909919	11738	0.896005	chr10	73610661	73611145	61923602	FALSE	FALSE
chr10_73723711_73724770	0.134521	0.0941772	-0.0403442	4071	-0.226359	2982	410	83	0.00113935	2.94334	-2.94334	2922	0.00561465	chr10	73723711	73724770	61809977	FALSE	FALSE
chr10_73767156_73768379	0.935547	0.95166	0.0161133	16431.5	0.163506	17130	400	82	0.0196285	1.70711	1.70711	17135	0.0621952	chr10	73767156	73768379	61766368	FALSE	FALSE
chr10_73846806_73848233	0.480469	0.498291	0.0178223	16531	0.0274282	12331	405	83	0.69398	0.158653	0.158653	12339	0.823459	chr10	73846806	73848233	61686514	FALSE	FALSE
chr10_73975671_73976115	0.0142822	0.0153885	0.00110626	12742	0.036104	12792	354	73	0.625364	0.203867	0.203867	12696	0.775854	chr10	73975671	73976115	61558632	FALSE	FALSE
chr10_74033167_74034698	0.00611877	0.00661469	0.000495911	11809.5	0.00183846	10950	398	82	0.979407	0.00903661	0.00903661	10950	0.989655	chr10	74033167	74034698	61500049	FALSE	FALSE
chr10_74057609_74058037	0.00876617	0.0072937	-0.00147247	8895	-0.0693528	7404	394	80	0.32777	0.484431	-0.484431	7427	0.521182	chr10	74057609	74058037	61476710	FALSE	FALSE
chr10_74079336_74079861	0.0128174	0.0098114	-0.00300598	7850	-0.0884774	6635	402	81	0.208867	0.68013	-0.68013	6636	0.385095	chr10	74079336	74079861	61454886	FALSE	FALSE
chr10_74113815_74114792	0.00965118	0.0119934	0.00234222	14083.5	0.112963	16065	407	83	0.104691	0.98009	0.98009	16089	0.233873	chr10	74113815	74114792	61419955	FALSE	FALSE
chr10_74451828_74452597	0.0118561	0.015625	0.00376892	14841.5	0.121787	16290	397	83	0.0808425	1.09236	1.09236	16303	0.192608	chr10	74451828	74452597	61082150	FALSE	FALSE
chr10_7449376_7455339	0.314941	0.322754	0.0078125	15685.5	-0.0645019	7608.5	410	83	0.354011	0.450983	-0.450983	7579	0.547904	chr10	7449376	7455339	7449376	TRUE	TRUE
chr10_74855858_74856985	0.00773621	0.00772476	-1.14441e-05	10851.5	0.051135	13556	404	82	0.465141	0.332415	0.332415	13558	0.650899	chr10	74855858	74856985	60677762	FALSE	FALSE
chr10_74927642_74928063	0.00550842	0.00608063	0.000572205	11918.5	0.114168	16103	398	82	0.103274	0.986009	0.986009	16104	0.231758	chr10	74927642	74928063	60606684	FALSE	FALSE
chr10_75006629_75007184	0.0339966	0.0445557	0.0105591	16002	0.155674	17016	397	81	0.0271489	1.56625	1.56625	17006	0.0815686	chr10	75006629	75007184	60527563	FALSE	FALSE
chr10_75012126_75012531	0.00179577	0.00202179	0.000226021	11300	0.0285315	12383	389	81	0.681148	0.166758	0.166758	12398	0.814214	chr10	75012126	75012531	60522216	FALSE	FALSE
chr10_75118205_75118679	0.00898743	0.0242462	0.0152588	16375	0.220479	17785	397	83	0.00156248	2.80619	2.80619	17795	0.00734435	chr10	75118205	75118679	60416068	FALSE	FALSE
chr10_75173411_75173950	0.0216064	0.0192261	-0.00238037	8224.5	-0.0364953	8950	406	82	0.602238	0.220232	-0.220232	8945	0.758965	chr10	75173411	75173950	60360797	FALSE	FALSE
chr10_75255033_75255808	0.0144806	0.0171967	0.00271606	14351	0.0137736	11586.5	405	83	0.843531	0.0738991	0.0738991	11591	0.914924	chr10	75255033	75255808	60278939	FALSE	FALSE
chr10_75385082_75385994	0.00729752	0.00925446	0.00195694	13768.5	0.0757716	14700	400	81	0.281815	0.550036	0.550036	14683	0.471806	chr10	75385082	75385994	60148753	FALSE	FALSE
chr10_75489947_75490554	0.0202026	0.0216522	0.00144958	13189	0.0261094	12249	407	83	0.707898	0.150029	0.150029	12259	0.832521	chr10	75489947	75490554	60044193	FALSE	FALSE
chr10_75492493_75493422	0.922852	0.921875	-0.000976562	9429.5	-0.019473	9786	389	80	0.784079	0.10564	-0.10564	9798	0.882396	chr10	75492493	75493422	60041325	FALSE	FALSE
chr10_75503973_75504222	0.00082016	0.00376701	0.00294685	14506	0.118026	16195	380	80	0.0783975	1.1057	1.1057	16336	0.188194	chr10	75503973	75504222	60030525	FALSE	FALSE
chr10_75531970_75532817	0.0204773	0.0185394	-0.00193787	8523	-0.0493177	8309	407	83	0.478862	0.319789	-0.319789	8288	0.662284	chr10	75531970	75532817	60001930	FALSE	FALSE
chr10_75541557_75542206	0.00362206	0.00333977	-0.000282288	10382	0.000384832	10876	407	83	0.995921	0.00177498	0.00177498	10877	0.998316	chr10	75541557	75542206	59992541	FALSE	FALSE
chr10_75545264_75546124	0.0308228	0.0216827	-0.00914001	6115.5	-0.253631	2504	409	83	0.000267442	3.57277	-3.57277	2459	0.00160294	chr10	75545264	75546124	59988623	FALSE	FALSE
chr10_75570928_75571809	0.0177917	0.0195923	0.00180054	13605	0.048758	13434	405	83	0.484065	0.315096	0.315096	13451	0.666332	chr10	75570928	75571809	59962938	FALSE	FALSE
chr10_75633600_75634796	0.0365601	0.0327148	-0.00384521	7492.5	-0.102542	6156	409	83	0.140647	0.851869	-0.851869	6117	0.289993	chr10	75633600	75634796	59899951	FALSE	FALSE
chr10_75670696_75671379	0.0303955	0.0552979	0.0249023	16861	0.154557	16997	384	80	0.0293647	1.53218	1.53218	16964	0.0868934	chr10	75670696	75671379	59863368	FALSE	FALSE
chr10_75757484_75758227	0.00578308	0.00660706	0.000823975	12299.5	0.0722469	14561	396	82	0.301227	0.521106	0.521106	14563	0.493209	chr10	75757484	75758227	59776520	FALSE	FALSE
chr10_75910836_75911480	0.00292778	0.00210953	-0.000818253	9620	-0.0663957	7526	396	82	0.333976	0.476284	-0.476284	7463	0.527693	chr10	75910836	75911480	59623267	FALSE	FALSE
chr10_75936217_75936726	0.00187969	0.00192833	4.86374e-05	11029	0.0100214	11396	371	78	0.883969	0.0535629	0.0535629	11407	0.938592	chr10	75936217	75936726	59598021	FALSE	FALSE
chr10_76573195_76573507	0.92627	0.867188	-0.059082	3502.5	-0.383529	746	385	82	4.86706e-08	7.31273	-7.31273	746	1.00318e-06	chr10	76573195	76573507	58961240	FALSE	TRUE
chr10_76584625_76586746	0.0137405	0.0187378	0.00499725	15215	0.0694191	14422	403	83	0.319176	0.49597	0.49597	14431	0.511527	chr10	76584625	76586746	58948001	FALSE	FALSE
chr10_76803360_76803857	0.972168	0.933105	-0.0390625	4122.5	-0.187602	3802	349	74	0.0106164	1.97402	-1.97402	3966	0.0372208	chr10	76803360	76803857	58730890	FALSE	TRUE
chr10_76871055_76871620	0.0155792	0.0215149	0.00593567	15404.5	0.137374	16678	408	82	0.0495566	1.3049	1.3049	16683	0.131757	chr10	76871055	76871620	58663127	FALSE	FALSE
chr10_76969992_76971002	0.0112534	0.0128326	0.00157928	13375.5	0.0737471	14620	402	82	0.292419	0.533995	0.533995	14619	0.483947	chr10	76969992	76971002	58563745	FALSE	FALSE
chr10_76993892_76995953	0.0159607	0.0370178	0.0210571	16696.5	0.365806	18532	409	83	1.46276e-07	6.83483	6.83483	18537	2.53997e-06	chr10	76993892	76995953	58538794	FALSE	FALSE
chr10_77054582_77054929	0.0135956	0.0102921	-0.00330353	7723.5	-0.092793	6479	399	82	0.185409	0.731868	-0.731868	6466	0.354039	chr10	77054582	77054929	58479818	FALSE	FALSE
chr10_77155128_77169600	0.398193	0.448486	0.050293	17523	0.180664	17366	410	83	0.00941104	2.02636	2.02636	17388	0.0335344	chr10	77155128	77169600	58365147	FALSE	FALSE
chr10_77191061_77191571	0.0914307	0.0444641	-0.0469666	3841	-0.158574	4434	396	83	0.0230647	1.63705	-1.63705	4405	0.0712403	chr10	77191061	77191571	58343176	FALSE	FALSE
chr10_7829588_7830517	0.010498	0.0115509	0.00105286	12670	0.0146466	11643	393	82	0.834852	0.0783906	0.0783906	11641	0.910207	chr10	7829588	7830517	7829588	TRUE	FALSE
chr10_7860261_7861107	0.0108185	0.0105515	-0.000267029	10411	0.0510578	13547	398	81	0.468593	0.329204	0.329204	13537	0.653459	chr10	7860261	7861107	7860261	TRUE	FALSE
chr10_79396095_79398495	0.187988	0.0921021	-0.0958862	2638	-0.282751	2040	410	83	4.81752e-05	4.31718	-4.31718	1995	0.000361044	chr10	79396095	79398495	56136252	FALSE	TRUE
chr10_79470962_79471425	0.271973	0.246826	-0.0251465	4715.5	-0.131322	5183	394	81	0.0626017	1.20341	-1.20341	5194	0.158522	chr10	79470962	79471425	56063322	FALSE	TRUE
chr10_79685719_79686507	0.00749207	0.00802612	0.000534058	11858.5	0.038028	12893	403	83	0.585039	0.232815	0.232815	12898	0.745971	chr10	79685719	79686507	55848240	FALSE	FALSE
chr10_79793494_79793952	0.0374756	0.0350342	-0.00244141	8178.5	-0.0606842	7782	402	81	0.388847	0.410222	-0.410222	7783	0.58246	chr10	79793494	79793952	55740795	FALSE	FALSE
chr10_80062780_80063588	0.00537491	0.0052948	-8.01086e-05	10736	0.0149738	11653	395	82	0.830949	0.0804257	0.0804257	11654	0.907793	chr10	80062780	80063588	55471159	FALSE	FALSE
chr10_80733751_80734013	0.0059166	0.00435638	-0.00156021	8821	-0.0580109	7886	399	82	0.405961	0.391516	-0.391516	7877	0.598951	chr10	80733751	80734013	54800734	FALSE	FALSE
chr10_8076002_8077261	0.647949	0.544922	-0.103027	2504	-0.268214	2285	405	83	0.000117497	3.92997	-3.92997	2235	0.000781756	chr10	8076002	8077261	8076002	TRUE	TRUE
chr10_8077829_8078378	0.699219	0.374512	-0.324707	248	-0.340608	1230	374	80	1.7191e-06	5.7647	-5.7647	1269	2.05415e-05	chr10	8077829	8078378	8077829	TRUE	TRUE
chr10_80827070_80830537	0.030365	0.0265503	-0.0038147	7506	-0.0956215	6376	410	83	0.169379	0.771141	-0.771141	6331	0.332441	chr10	80827070	80830537	54704210	FALSE	FALSE
chr10_8091374_8098329	0.38916	0.358154	-0.0310059	4452.5	-0.086365	6707	410	83	0.214556	0.668459	-0.668459	6676	0.392401	chr10	8091374	8098329	8091374	TRUE	TRUE
chr10_81002109_81003687	0.530762	0.698242	0.16748	18397	0.127172	16439	407	83	0.0677572	1.16904	1.16904	16462	0.168547	chr10	81002109	81003687	54531060	FALSE	TRUE
chr10_8100384_8100768	0.848633	0.780762	-0.0678711	3273.5	-0.146812	4727	388	81	0.0376242	1.42453	-1.42453	4743	0.106196	chr10	8100384	8100768	8100384	TRUE	TRUE
chr10_81107082_81107488	0.00476074	0.00526047	0.000499725	11814	0.0131391	11549	389	81	0.851232	0.0699522	0.0699522	11549	0.919126	chr10	81107082	81107488	54427259	FALSE	FALSE
chr10_81107667_81107947	0.00697708	0.00505447	-0.00192261	8533	-0.14597	4748.5	397	80	0.0390977	1.40785	-1.40785	4775	0.109448	chr10	81107667	81107947	54426800	FALSE	FALSE
chr10_81205001_81205811	0.00918579	0.00854492	-0.000640869	9832	0.0267331	12286	406	82	0.70272	0.153218	0.153218	12286	0.828998	chr10	81205001	81205811	54328936	FALSE	FALSE
chr10_81585357_81586971	0.00734711	0.00852203	0.00117493	12830	0.0962379	15519	408	83	0.166816	0.777763	0.777763	15545	0.328857	chr10	81585357	81586971	53947776	FALSE	FALSE
chr10_81664389_81665076	0.057251	0.0418091	-0.0154419	5373	-0.150189	4645	408	83	0.0309475	1.50937	-1.50937	4603	0.0905702	chr10	81664389	81665076	53869671	FALSE	FALSE
chr10_81741228_81742293	0.0422058	0.0401917	-0.00201416	8440	0.00737101	11259	407	83	0.916001	0.0381042	0.0381042	11260	0.957779	chr10	81741228	81742293	53792454	FALSE	FALSE
chr10_81838359_81839078	0.00740814	0.00565338	-0.00175476	8655	-0.103954	6096	398	83	0.13538	0.868444	-0.868444	6062	0.282206	chr10	81838359	81839078	53695669	FALSE	FALSE
chr10_81892222_81892640	0.258789	0.208496	-0.050293	3727	-0.150661	4634	410	83	0.0303544	1.51778	-1.51778	4591	0.0890851	chr10	81892222	81892640	53642107	FALSE	FALSE
chr10_81964681_81965558	0.0124817	0.0170593	0.00457764	15095.5	0.120214	16247	405	83	0.0843289	1.07402	1.07402	16268	0.198966	chr10	81964681	81965558	53569189	FALSE	FALSE
chr10_82116202_82117120	0.380371	0.377197	-0.00317383	7782	-0.0835303	6808	376	81	0.238251	0.622966	-0.622966	6834	0.42193	chr10	82116202	82117120	53417627	FALSE	TRUE
chr10_82168064_82168917	0.0243835	0.0458679	0.0214844	16715	0.185451	17422	401	82	0.00811705	2.0906	2.0906	17424	0.0295074	chr10	82168064	82168917	53365830	FALSE	FALSE
chr10_82213556_82214760	0.0273132	0.0231781	-0.00413513	7362	-0.123251	5411	409	83	0.0765564	1.11602	-1.11602	5380	0.184817	chr10	82213556	82214760	53319987	FALSE	FALSE
chr10_82295501_82296192	0.292725	0.417725	0.125	18227	0.062403	14101	393	82	0.374057	0.427062	0.427062	14101	0.567871	chr10	82295501	82296192	53238555	FALSE	TRUE
chr10_83633820_83635729	0.302002	0.11615	-0.185791	1238	-0.258104	2444	407	83	0.000209164	3.67951	-3.67951	2397	0.00129123	chr10	83633820	83635729	51899018	FALSE	TRUE
chr10_851100_851525	0.938477	0.931152	-0.00732422	6489	-0.0399096	8786	400	83	0.567259	0.246219	-0.246219	8775	0.731627	chr10	851100	851525	851100	TRUE	FALSE
chr10_85899058_85899640	0.00323105	0.00336456	0.000133514	11161	0.0330402	12634	398	80	0.63963	0.194071	0.194071	12624	0.786009	chr10	85899058	85899640	49635107	FALSE	FALSE
chr10_85954199_85955303	0.180176	0.172974	-0.00720215	6519.5	-0.0627221	7689	398	82	0.371086	0.430526	-0.430526	7693	0.564614	chr10	85954199	85955303	49579444	FALSE	TRUE
chr10_86088395_86088791	0.00493622	0.00451279	-0.000423431	10172	-0.00677507	10479	396	82	0.922934	0.0348295	-0.0348295	10480	0.961526	chr10	86088395	86088791	49445956	FALSE	FALSE
chr10_86300399_86300953	0.338379	0.310791	-0.0275879	4591.5	-0.0606375	7784	395	83	0.385123	0.4144	-0.4144	7763	0.579014	chr10	86300399	86300953	49233794	FALSE	FALSE
chr10_88122924_88127364	0.266113	0.335938	0.0698242	17805.5	0.085072	15092	410	83	0.221501	0.654623	0.654623	15112	0.401049	chr10	88122924	88127364	47407383	FALSE	TRUE
chr10_88136644_88137288	0.127197	0.115417	-0.0117798	5736.5	-0.0561119	7973	391	83	0.42203	0.374657	-0.374657	7951	0.6141	chr10	88136644	88137288	47397459	FALSE	TRUE
chr10_88149266_88149738	0.682617	0.723633	0.0410156	17344.5	-0.0328255	9131	361	80	0.646153	0.189664	-0.189664	9163	0.790747	chr10	88149266	88149738	47385009	FALSE	TRUE
chr10_88159613_88161411	0.0500488	0.0571899	0.00714111	15593.5	0.0807523	14912	410	83	0.245867	0.6093	0.6093	14933	0.430923	chr10	88159613	88161411	47373336	FALSE	FALSE
chr10_88280635_88282089	0.0122223	0.0130234	0.000801086	12267.5	0.0681643	14366	406	83	0.327733	0.48448	0.48448	14381	0.521168	chr10	88280635	88282089	47252658	FALSE	FALSE
chr10_88295205_88295592	0.0857544	0.585449	0.499756	18701.5	0.224223	17819	395	81	0.00147137	2.83228	2.83228	17804	0.00697472	chr10	88295205	88295592	47239155	FALSE	FALSE
chr10_88296170_88296619	0.918945	0.87793	-0.0410156	4044.5	-0.217956	3153	382	81	0.00205043	2.68816	-2.68816	3160	0.00927717	chr10	88296170	88296619	47238128	FALSE	FALSE
chr10_88391746_88392242	0.518555	0.494873	-0.0236816	4796	-0.127615	5277	383	81	0.0710788	1.14826	-1.14826	5309	0.174516	chr10	88391746	88392242	47142505	FALSE	TRUE
chr10_88470905_88471934	0.0197296	0.0238037	0.0040741	14939.5	0.0918398	15341	405	82	0.18957	0.72223	0.72223	15352	0.359383	chr10	88470905	88471934	47062813	FALSE	FALSE
chr10_88515426_88517217	0.0430908	0.0357056	-0.00738525	6467.5	-0.179044	3980	409	83	0.0100845	1.99635	-1.99635	3939	0.0356228	chr10	88515426	88517217	47017530	FALSE	FALSE
chr10_88702315_88703322	0.901855	0.833008	-0.0688477	3251	-0.244933	2645	399	81	0.000506892	3.29508	-3.29508	2636	0.00280731	chr10	88702315	88703322	46831425	FALSE	TRUE
chr10_88728039_88728720	0.356934	0.77832	0.421387	18678	0.172941	17264	401	83	0.0131018	1.88267	1.88267	17284	0.0442784	chr10	88728039	88728720	46806027	FALSE	TRUE
chr10_88730554_88731632	0.204834	0.195801	-0.0090332	6130.5	-0.0710194	7327	408	83	0.30768	0.511901	-0.511901	7300	0.501014	chr10	88730554	88731632	46803115	FALSE	TRUE
chr10_88853757_88855498	0.0577698	0.0449219	-0.0128479	5624.5	-0.105492	6041	409	82	0.131515	0.881025	-0.881025	6031	0.276117	chr10	88853757	88855498	46679249	FALSE	FALSE
chr10_89101402_89103018	0.00615692	0.00688934	0.000732422	12152	0.09045	15296	408	83	0.193813	0.712617	0.712617	15317	0.364916	chr10	89101402	89103018	46431729	FALSE	FALSE
chr10_89264370_89265371	0.00679779	0.00817871	0.00138092	13108	0.0699588	14448	408	81	0.319796	0.495127	0.495127	14427	0.512198	chr10	89264370	89265371	46269376	FALSE	FALSE
chr10_89419346_89420027	0.025238	0.0332947	0.00805664	15720	0.131611	16559	404	82	0.0601332	1.22089	1.22089	16564	0.153516	chr10	89419346	89420027	46114720	FALSE	FALSE
chr10_89577481_89578287	0.0134583	0.0102463	-0.00321198	7762.5	-0.114919	5701	405	83	0.0989422	1.00462	-1.00462	5658	0.224701	chr10	89577481	89578287	45956460	FALSE	FALSE
chr10_89621772_89624128	0.0243225	0.0425415	0.018219	16548	0.270922	18165	409	83	9.88223e-05	4.00514	4.00514	18175	0.00067182	chr10	89621772	89624128	45910619	FALSE	FALSE
chr10_90342528_90343221	0.17334	0.263672	0.090332	17992.5	0.0470312	13357	399	81	0.504583	0.297067	0.297067	13334	0.68233	chr10	90342528	90343221	45191526	FALSE	TRUE
chr10_90639787_90640623	0.0168762	0.0189056	0.00202942	13825	0.0565845	13827	402	83	0.416967	0.379898	0.379898	13834	0.608766	chr10	90639787	90640623	44894124	FALSE	FALSE
chr10_90750293_90751108	0.0143509	0.0108719	-0.003479	7629	-0.0861431	6715	407	83	0.215962	0.665623	-0.665623	6687	0.394142	chr10	90750293	90751108	44783639	FALSE	FALSE
chr10_90967555_90967900	0.142212	0.135742	-0.00646973	6654	-0.0319497	9180	381	81	0.651717	0.185941	-0.185941	9190	0.794536	chr10	90967555	90967900	44566847	FALSE	FALSE
chr10_91011325_91011864	0.00936127	0.00708771	-0.00227356	8277	-0.0423134	8668	396	82	0.544052	0.264359	-0.264359	8654	0.713421	chr10	91011325	91011864	44522883	FALSE	FALSE
chr10_91174405_91175166	0.0185394	0.0133667	-0.00517273	7009	-0.126689	5308	399	82	0.0706245	1.15104	-1.15104	5302	0.173711	chr10	91174405	91175166	44359581	FALSE	FALSE
chr10_91294947_91295925	0.362061	0.317871	-0.0441895	3936	-0.108645	5933	406	82	0.120599	0.918655	-0.918655	5923	0.259093	chr10	91294947	91295925	44238822	FALSE	FALSE
chr10_91404237_91405048	0.0795898	0.0592957	-0.0202942	4980	-0.186151	3845	404	83	0.00753391	2.12298	-2.12298	3802	0.0277432	chr10	91404237	91405048	44129699	FALSE	FALSE
chr10_91596974_91597792	0.364258	0.395752	0.0314941	17087	-0.0182365	9857	394	81	0.796258	0.0989461	-0.0989461	9864	0.888967	chr10	91596974	91597792	43936955	FALSE	TRUE
chr10_92616820_92618034	0.0876465	0.0429993	-0.0446472	3919	-0.241083	2716	403	83	0.000539771	3.26779	-3.26779	2656	0.00296313	chr10	92616820	92618034	42916713	FALSE	TRUE
chr10_92980347_92980832	0.0604858	0.0508423	-0.00964355	6031	-0.0337759	9082	386	80	0.634428	0.197618	-0.197618	9099	0.783201	chr10	92980347	92980832	42553915	FALSE	FALSE
chr10_93169487_93170573	0.00790405	0.00649643	-0.00140762	8981	0.00138554	10924	400	83	0.984476	0.00679478	0.00679478	10924	0.991731	chr10	93169487	93170573	42364174	FALSE	FALSE
chr10_93392667_93393147	0.0413818	0.0427246	0.00134277	13055	0.0133117	11565	385	80	0.851652	0.0697381	0.0697381	11547	0.919292	chr10	93392667	93393147	42141600	FALSE	FALSE
chr10_93557970_93558699	0.00661469	0.00821686	0.00160217	13404.5	0.0631762	14136	399	82	0.366587	0.435823	0.435823	14139	0.560226	chr10	93557970	93558699	41976048	FALSE	FALSE
chr10_93647052_93647393	0.0690918	0.0356445	-0.0334473	4344.5	-0.190322	3746	367	79	0.00791331	2.10164	-2.10164	3826	0.0289182	chr10	93647052	93647393	41887354	FALSE	FALSE
chr10_93668002_93668771	0.0175934	0.0412292	0.0236359	16803	0.323309	18400	397	82	3.99619e-06	5.39835	5.39835	18400	4.24207e-05	chr10	93668002	93668771	41865976	FALSE	FALSE
chr10_93683430_93683839	0.00520706	0.00660706	0.00139999	13124	0.153341	16976	397	81	0.0294075	1.53154	1.53154	16961	0.0869737	chr10	93683430	93683839	41850908	FALSE	FALSE
chr10_93999131_94000015	0.0437622	0.086792	0.0430298	17397	0.153841	16986	398	83	0.027417	1.56198	1.56198	16996	0.0821897	chr10	93999131	94000015	41534732	FALSE	FALSE
chr10_94050423_94051412	0.0179443	0.0204468	0.00250244	14234	0.100116	15658	401	82	0.153019	0.815256	0.815256	15661	0.308482	chr10	94050423	94051412	41483335	FALSE	FALSE
chr10_94180315_94180754	0.792969	0.770508	-0.0224609	4874	-0.0563011	7962	367	80	0.430132	0.366398	-0.366398	8012	0.620825	chr10	94180315	94180754	41353993	FALSE	FALSE
chr10_94333247_94334467	0.00957489	0.00920868	-0.000366211	10259	0.0392537	12955	401	81	0.577443	0.238491	0.238491	12942	0.740096	chr10	94333247	94334467	41200280	FALSE	FALSE
chr10_94352667_94353159	0.00540924	0.00569153	0.000282288	11400	0.0857906	15114	402	82	0.220526	0.65654	0.65654	15117	0.399746	chr10	94352667	94353159	41181588	FALSE	FALSE
chr10_94448693_94450479	0.0809937	0.22876	0.147705	18333	0.210711	17702	409	83	0.00246126	2.60884	2.60884	17719	0.0108453	chr10	94448693	94450479	41084268	FALSE	FALSE
chr10_94451329_94451737	0.916992	0.903809	-0.0131836	5591	-0.00356013	10672	384	79	0.9606	0.0174574	-0.0174574	10676	0.979885	chr10	94451329	94451737	41083010	FALSE	FALSE
chr10_94455524_94455896	0.757812	0.601074	-0.156738	1604	-0.34802	1138	385	81	8.4185e-07	6.07477	-6.07477	1156	1.10921e-05	chr10	94455524	94455896	41078851	FALSE	FALSE
chr10_94608037_94609039	0.00945282	0.01297	0.00351715	14766.5	0.139614	16722	398	83	0.0452334	1.34454	1.34454	16739	0.122612	chr10	94608037	94609039	40925708	FALSE	FALSE
chr10_94820026_94823252	0.85498	0.837402	-0.0175781	5193	-0.0411402	8727	410	83	0.554522	0.256081	-0.256081	8714	0.72143	chr10	94820026	94823252	40711495	FALSE	TRUE
chr10_94825546_94826320	0.79248	0.785645	-0.00683594	6592.5	-0.0169986	9944	398	81	0.809672	0.0916908	-0.0916908	9950	0.895483	chr10	94825546	94826320	40708427	FALSE	TRUE
chr10_94828102_94829040	0.570312	0.506348	-0.0639648	3375	-0.0654573	7563	400	82	0.350377	0.455464	-0.455464	7556	0.54442	chr10	94828102	94829040	40705707	FALSE	TRUE
chr10_94831512_94832312	0.0844727	0.127686	0.0432129	17401.5	0.0891446	15253	401	83	0.201018	0.696765	0.696765	15261	0.374381	chr10	94831512	94832312	40702435	FALSE	FALSE
chr10_94833272_94835256	0.340332	0.442383	0.102051	18084.5	0.156134	17025	401	82	0.0258411	1.58769	1.58769	17026	0.0782163	chr10	94833272	94835256	40699491	FALSE	TRUE
chr10_95256133_95256562	0.00692368	0.00852203	0.00159836	13399.5	0.0629819	14125	400	83	0.36616	0.436329	0.436329	14145	0.559786	chr10	95256133	95256562	40278185	FALSE	FALSE
chr10_95326229_95327108	0.0473633	0.0733643	0.026001	16900	0.167079	17188	394	82	0.017253	1.76314	1.76314	17190	0.055714	chr10	95326229	95327108	40207639	FALSE	TRUE
chr10_95360389_95361387	0.363037	0.276611	-0.0864258	2824	-0.267476	2297	404	83	0.000123094	3.90976	-3.90976	2253	0.00081179	chr10	95360389	95361387	40173360	FALSE	FALSE
chr10_95462160_95462500	0.0184174	0.0187073	0.000289917	11414	-0.00778584	10427	398	81	0.912174	0.0399225	-0.0399225	10426	0.95561	chr10	95462160	95462500	40072247	FALSE	FALSE
chr10_95653641_95654181	0.00993347	0.0121155	0.00218201	13966	0.0522985	13611	398	81	0.457815	0.33931	0.33931	13607	0.645129	chr10	95653641	95654181	39880566	FALSE	FALSE
chr10_95753347_95754201	0.0255585	0.0367126	0.0111542	16045.5	0.157931	17051	397	83	0.0235894	1.62728	1.62728	17064	0.0725733	chr10	95753347	95754201	39780546	FALSE	FALSE
chr10_96122540_96122904	0.00615311	0.00579834	-0.000354767	10274.5	0.0268411	12291	387	80	0.704201	0.152303	0.152303	12277	0.830067	chr10	96122540	96122904	39411843	FALSE	FALSE
chr10_96162023_96163327	0.00684357	0.0066452	-0.000198364	10529.5	0.0187284	11850	404	83	0.788312	0.103302	0.103302	11855	0.884206	chr10	96162023	96163327	39371420	FALSE	FALSE
chr10_96943195_96943737	0.0118561	0.0148087	0.00295258	14509	0.154728	16999	397	82	0.0272315	1.56493	1.56493	17001	0.0817251	chr10	96943195	96943737	38591010	FALSE	TRUE
chr10_97050185_97051124	0.0419006	0.0452881	0.00338745	14701.5	0.124408	16367	407	82	0.0754166	1.12253	1.12253	16374	0.18289	chr10	97050185	97051124	38483623	FALSE	FALSE
chr10_97055128_97055448	0.289551	0.25293	-0.0366211	4216.5	-0.0449062	8550	373	80	0.528594	0.276878	-0.276878	8580	0.701696	chr10	97055128	97055448	38479299	FALSE	TRUE
chr10_97320424_97321483	0.0155029	0.0159607	0.000457764	11711	-0.0145415	10097	395	82	0.836067	0.0777591	-0.0777591	10095	0.910994	chr10	97320424	97321483	38213264	FALSE	FALSE
chr10_97415860_97416726	0.0133057	0.010376	-0.00292969	7908	-0.0649427	7582	410	83	0.350721	0.455038	-0.455038	7558	0.544669	chr10	97415860	97416726	38118021	FALSE	FALSE
chr10_97453478_97454013	0.0135422	0.00856018	-0.00498199	7057	-0.137535	5008	402	83	0.0484046	1.31511	-1.31511	4974	0.129263	chr10	97453478	97454013	38080734	FALSE	FALSE
chr10_97667243_97667978	0.00714874	0.00920105	0.00205231	13843	0.0789939	14814	400	82	0.258622	0.587334	0.587334	14829	0.445086	chr10	97667243	97667978	37866769	FALSE	FALSE
chr10_977260_978072	0.0258484	0.0177002	-0.00814819	6311.5	-0.137278	5014	406	83	0.0486642	1.31279	-1.31279	4981	0.129771	chr10	977260	978072	977260	TRUE	FALSE
chr10_97802871_97804262	0.0199127	0.0215454	0.00163269	13442	0.0602706	14001	406	83	0.386878	0.412426	0.412426	14026	0.580488	chr10	97802871	97804262	37730485	FALSE	FALSE
chr10_97849568_97850095	0.00891876	0.00892639	7.62939e-06	10943.5	-0.0306525	9246	379	81	0.661968	0.179163	-0.179163	9244	0.800866	chr10	97849568	97850095	37684652	FALSE	FALSE
chr10_97889636_97890412	0.0102234	0.0176697	0.00744629	15638.5	0.168779	17216	406	82	0.0158686	1.79946	1.79946	17226	0.0519416	chr10	97889636	97890412	37644335	FALSE	FALSE
chr10_98272207_98273939	0.0881958	0.134766	0.0465698	17467	0.118719	16212	410	83	0.0879633	1.0557	1.0557	16235	0.205496	chr10	98272207	98273939	37260808	FALSE	FALSE
chr10_98346049_98347064	0.0102158	0.0107803	0.000564575	11909	0.0300524	12459	403	81	0.669649	0.174153	0.174153	12451	0.80535	chr10	98346049	98347064	37187683	FALSE	FALSE
chr10_98479725_98480487	0.0157776	0.0656128	0.0498352	17517	0.308171	18340	393	81	1.21231e-05	4.91639	4.91639	18332	0.000109253	chr10	98479725	98480487	37054260	FALSE	FALSE
chr10_98591707_98593273	0.0123901	0.0120163	-0.00037384	10244.5	-0.0458965	8505	404	83	0.510195	0.292264	-0.292264	8482	0.686809	chr10	98591707	98593273	36941474	FALSE	FALSE
chr10_98803065_98803434	0.808594	0.679688	-0.128906	2027.5	-0.44674	301	392	82	1.95427e-10	9.70902	-9.70902	292	1.02852e-08	chr10	98803065	98803434	36731313	FALSE	TRUE
chr10_98945062_98946239	0.188721	0.155151	-0.0335693	4338.5	-0.15303	4564	402	83	0.0281067	1.55119	-1.55119	4526	0.083908	chr10	98945062	98946239	36588508	FALSE	TRUE
chr10_98955994_98956285	0.033783	0.0396118	0.00582886	15369.5	0.00658017	11219	390	83	0.925293	0.0337208	0.0337208	11217	0.962753	chr10	98955994	98956285	36578462	FALSE	FALSE
chr10_99078811_99081048	0.157349	0.182129	0.0247803	16857	0.199147	17589	409	82	0.00440706	2.35585	2.35585	17587	0.0176702	chr10	99078811	99081048	36453699	FALSE	FALSE
chr10_99093406_99094955	0.00980377	0.0101471	0.000343323	11498.5	0.0622785	14095.5	408	83	0.371053	0.430564	0.430564	14116	0.56461	chr10	99093406	99094955	36439792	FALSE	FALSE
chr10_99160814_99161116	0.00333405	0.00424957	0.000915527	12451	0.0233042	12109	393	82	0.738384	0.131717	0.131717	12113	0.853553	chr10	99160814	99161116	36373631	FALSE	FALSE
chr10_99185778_99186294	0.373535	0.378418	0.00488281	15168	-0.0313073	9213	401	83	0.653592	0.184693	-0.184693	9199	0.795881	chr10	99185778	99186294	36348453	FALSE	FALSE
chr10_99205476_99206274	0.00389481	0.00417709	0.000282288	11400	0.0777738	14767	402	83	0.262847	0.580297	0.580297	14800	0.449925	chr10	99205476	99206274	36328473	FALSE	FALSE
chr10_99257940_99259520	0.0491943	0.0394897	-0.00970459	6022.5	-0.255098	2480	410	83	0.00024561	3.60975	-3.60975	2435	0.00148876	chr10	99257940	99259520	36275227	FALSE	FALSE
chr10_99392786_99393375	0.0107422	0.0117493	0.00100708	12603.5	0.0721621	14555	399	82	0.303293	0.518137	0.518137	14552	0.495769	chr10	99392786	99393375	36141372	FALSE	FALSE
chr10_99400263_99400982	0.00724411	0.00782776	0.000583649	11930	0.071093	14509	405	82	0.309903	0.508775	0.508775	14511	0.503279	chr10	99400263	99400982	36133765	FALSE	FALSE
chr10_99446696_99447400	0.0072403	0.0102768	0.0030365	14539.5	0.159891	17084	406	83	0.0216499	1.66454	1.66454	17101	0.0675155	chr10	99446696	99447400	36087347	FALSE	FALSE
chr10_99473520_99474664	0.0256348	0.0228729	-0.00276184	8005.5	-0.084189	6786	406	83	0.226725	0.644501	-0.644501	6764	0.407357	chr10	99473520	99474664	36060083	FALSE	FALSE
chr10_99496649_99497451	0.00765228	0.00820923	0.000556946	11892.5	0.0464414	13319	399	83	0.505435	0.296335	0.296335	13326	0.682903	chr10	99496649	99497451	36037296	FALSE	FALSE
chr10_99531025_99531968	0.186279	0.188477	0.00219727	13975	-0.021884	9670	399	82	0.755149	0.121967	-0.121967	9673	0.863806	chr10	99531025	99531968	36002779	FALSE	FALSE
chr10_99609425_99610116	0.0185242	0.0166168	-0.00190735	8546	0.0224873	12064	393	80	0.751096	0.124305	0.124305	12056	0.862127	chr10	99609425	99610116	35924631	FALSE	FALSE
chr10_99789614_99791320	0.235596	0.148682	-0.0869141	2815.5	-0.17752	4011	410	83	0.0107246	1.96962	-1.96962	3968	0.037551	chr10	99789614	99791320	35743427	FALSE	TRUE
chr10_99894265_99894914	0.00567627	0.00564194	-3.43323e-05	10812.5	0.0839471	15054	404	82	0.230543	0.637249	0.637249	15049	0.412317	chr10	99894265	99894914	35639833	FALSE	FALSE
chr11_100557923_100558401	0.0124359	0.0144272	0.00199127	13796	-0.0102988	10313	397	79	0.88534	0.0528897	-0.0528897	10318	0.939494	chr11	100557923	100558401	34448115	FALSE	FALSE
chr11_1007921_1008343	0.945312	0.946289	0.000976562	12547.5	0.00560597	11166	389	83	0.93641	0.028534	0.028534	11166	0.968428	chr11	1007921	1008343	1007921	TRUE	FALSE
chr11_1009403_1009649	0.959961	0.95459	-0.00537109	6943	-0.0200855	9762	260	63	0.804353	0.0945535	-0.0945535	9918	0.892957	chr11	1009403	1009649	1009403	TRUE	FALSE
chr11_100998030_100999774	0.220703	0.201782	-0.0189209	5102.5	-0.0910702	6541	408	83	0.190797	0.719429	-0.719429	6507	0.360978	chr11	100998030	100999774	34006742	FALSE	TRUE
chr11_101453357_101454684	0.392578	0.243286	-0.149292	1710	-0.146531	4736	401	83	0.0355485	1.44918	-1.44918	4706	0.101375	chr11	101453357	101454684	33551832	FALSE	TRUE
chr11_101785594_101786128	0.028244	0.023056	-0.00518799	7005	-0.111148	5838	403	82	0.112488	0.948892	-0.948892	5822	0.246674	chr11	101785594	101786128	33220388	FALSE	FALSE
chr11_101918073_101918493	0.0529175	0.124817	0.0718994	17830	0.132104	16575	394	82	0.0597432	1.22371	1.22371	16571	0.152792	chr11	101918073	101918493	33088023	FALSE	FALSE
chr11_101980632_101982330	0.0276794	0.0187225	-0.00895691	6144	-0.262651	2378	410	83	0.000159777	3.79648	-3.79648	2332	0.00101754	chr11	101980632	101982330	33024186	FALSE	FALSE
chr11_102217574_102218247	0.00630569	0.0074234	0.00111771	12754.5	0.0957012	15499	400	82	0.171921	0.76467	0.76467	15500	0.335813	chr11	102217574	102218247	32788269	FALSE	FALSE
chr11_102322529_102323762	0.0166626	0.0162659	-0.000396729	10206	-0.0762355	7107	403	83	0.273992	0.562262	-0.562262	7078	0.462896	chr11	102322529	102323762	32682754	FALSE	FALSE
chr11_1024003_1024492	0.960449	0.9375	-0.0229492	4840.5	-0.275618	2172	396	83	7.79867e-05	4.10798	-4.10798	2125	0.000546637	chr11	1024003	1024492	1024003	TRUE	TRUE
chr11_1024746_1025359	0.82373	0.753418	-0.0703125	3213.5	-0.182659	3918	392	83	0.00891554	2.04985	-2.04985	3886	0.0320126	chr11	1024746	1025359	1024746	TRUE	TRUE
chr11_1029083_1029390	0.611328	0.332275	-0.279053	427	-0.442033	322	392	83	2.4605e-10	9.60898	-9.60898	302	1.25506e-08	chr11	1029083	1029390	1029083	TRUE	TRUE
chr11_102962274_102963049	0.00697708	0.00661469	-0.000362396	10268.5	0.00343373	11038.5	400	83	0.961019	0.017268	0.017268	11042	0.979971	chr11	102962274	102963049	32043467	FALSE	FALSE
chr11_10315279_10315933	0.0217133	0.0175476	-0.00416565	7349	-0.134481	5091	401	82	0.0549159	1.2603	-1.2603	5087	0.142952	chr11	10315279	10315933	10315279	FALSE	FALSE
chr11_10326048_10326590	0.0512695	0.0647583	0.0134888	16241.5	0.151403	16941	399	83	0.0298552	1.52498	1.52498	16952	0.0879785	chr11	10326048	10326590	10326048	FALSE	FALSE
chr11_10327013_10329831	0.0496521	0.0374451	-0.012207	5702	0.0117234	11485	408	83	0.866554	0.0622043	0.0622043	11485	0.928394	chr11	10327013	10329831	10327013	FALSE	FALSE
chr11_1036420_1036827	0.390869	0.290771	-0.100098	2556	-0.199267	3557	391	81	0.00474622	2.32365	-2.32365	3561	0.0188161	chr11	1036420	1036827	1036420	TRUE	TRUE
chr11_104034536_104035058	0.0747681	0.065918	-0.0088501	6158	-0.0900601	6579	390	81	0.202061	0.694518	-0.694518	6593	0.375651	chr11	104034536	104035058	30971458	FALSE	FALSE
chr11_10472000_10472857	0.0678101	0.290039	0.222168	18525	0.253042	18056	403	83	0.000281386	3.5507	3.5507	18063	0.00167342	chr11	10472000	10472857	10472000	FALSE	TRUE
chr11_10562225_10562942	0.0247955	0.0273895	0.00259399	14285	0.00451671	11101	405	82	0.948877	0.0227902	0.0227902	11102	0.974121	chr11	10562225	10562942	10562225	FALSE	FALSE
chr11_105892725_105892952	0.00611115	0.00402069	-0.00209045	8385	-0.208543	3342	398	81	0.00299978	2.52291	-2.52291	3336	0.0127881	chr11	105892725	105892952	29113564	FALSE	FALSE
chr11_105948097_105948830	0.00591278	0.00658798	0.000675201	12066	-0.0277778	9387	388	81	0.692875	0.159345	-0.159345	9385	0.822877	chr11	105948097	105948830	29057686	FALSE	FALSE
chr11_106888323_106890203	0.0603638	0.0388184	-0.0215454	4917.5	-0.207074	3381	401	82	0.00311799	2.50613	-2.50613	3351	0.0132229	chr11	106888323	106890203	28116313	FALSE	TRUE
chr11_107328441_107328691	0.00509262	0.00349236	-0.00160027	8785.5	-0.123282	5409	394	82	0.0782498	1.10652	-1.10652	5401	0.18796	chr11	107328441	107328691	27677825	FALSE	FALSE
chr11_107461743_107462648	0.0487061	0.0243835	-0.0243225	4768.5	-0.280262	2091	405	83	5.71349e-05	4.2431	-4.2431	2040	0.000418975	chr11	107461743	107462648	27543868	FALSE	FALSE
chr11_10772493_10773089	0.00489807	0.00485992	-3.8147e-05	10808	0.00880413	11327	392	82	0.900437	0.0455468	0.0455468	11326	0.948568	chr11	10772493	10773089	10772493	FALSE	FALSE
chr11_107728949_107729586	0.00460052	0.00793457	0.00333405	14680.5	0.103845	15786	373	79	0.134918	0.869929	0.869929	15813	0.281464	chr11	107728949	107729586	27276930	FALSE	FALSE
chr11_107798958_107799980	0.133911	0.0623474	-0.0715332	3175	-0.224114	3022	409	83	0.00127878	2.8932	-2.8932	2965	0.00619262	chr11	107798958	107799980	27206536	FALSE	FALSE
chr11_107879500_107880398	0.00510025	0.0055275	0.000427246	11660	0.0841879	15062	403	83	0.226927	0.644113	0.644113	15070	0.407447	chr11	107879500	107880398	27126118	FALSE	FALSE
chr11_107992004_107992731	0.00622559	0.00621033	-1.52588e-05	10845	0.0383708	12909	403	82	0.583839	0.233707	0.233707	12907	0.745099	chr11	107992004	107992731	27013785	FALSE	FALSE
chr11_108093211_108093969	0.00378609	0.00222206	-0.00156403	8818.5	-0.0901937	6571	395	83	0.185961	0.730579	-0.730579	6473	0.354514	chr11	108093211	108093969	26912547	FALSE	FALSE
chr11_10829361_10831121	0.0131378	0.0125809	-0.000556946	9951.5	-0.0478384	8391	408	83	0.492083	0.307962	-0.307962	8373	0.673067	chr11	10829361	10831121	10829361	FALSE	FALSE
chr11_108368498_108369407	0.00971222	0.0111237	0.00141144	13143.5	0.0680743	14361	402	82	0.33109	0.480055	0.480055	14363	0.524725	chr11	108368498	108369407	26637109	FALSE	FALSE
chr11_108463598_108464103	0.00826263	0.0185242	0.0102615	15968	0.203969	17637	397	82	0.00350775	2.45497	2.45497	17648	0.0146047	chr11	108463598	108464103	26542413	FALSE	FALSE
chr11_108535584_108536196	0.00605011	0.00828552	0.00223541	14006.5	0.112807	16061	405	83	0.105184	0.978051	0.978051	16085	0.234638	chr11	108535584	108536196	26470320	FALSE	FALSE
chr11_10879102_10880453	0.00439835	0.00429916	-9.91821e-05	10708	0.0141493	11612	397	81	0.840973	0.075218	0.075218	11609	0.913524	chr11	10879102	10880453	10879102	FALSE	FALSE
chr11_109293519_109294983	0.195801	0.230835	0.0350342	17193	0.0647366	14205	402	83	0.35307	0.45214	0.45214	14214	0.54693	chr11	109293519	109294983	25711533	FALSE	TRUE
chr11_1094946_1095920	0.614258	0.265625	-0.348633	170.5	-0.472728	189	402	82	1.47996e-11	10.8297	-10.8297	181	1.22576e-09	chr11	1094946	1095920	1094946	TRUE	TRUE
chr11_10952350_10953072	0.0294037	0.0281219	-0.00128174	9088	-0.0649	7584	406	83	0.351446	0.454141	-0.454141	7562	0.545243	chr11	10952350	10953072	10952350	FALSE	FALSE
chr11_109963240_109964677	0.0124054	0.0116043	-0.000801086	9634	-0.0592593	7835	405	83	0.395	0.403403	-0.403403	7813	0.588246	chr11	109963240	109964677	25041839	FALSE	FALSE
chr11_110166564_110167759	0.0154037	0.0160675	0.000663757	12045.5	-0.00461798	10611.5	407	83	0.947441	0.0234477	-0.0234477	10608	0.973451	chr11	110166564	110167759	24838757	FALSE	FALSE
chr11_110300574_110301334	0.0092926	0.00967407	0.00038147	11575.5	0.0736525	14615	405	82	0.292806	0.533421	0.533421	14617	0.484373	chr11	110300574	110301334	24705182	FALSE	FALSE
chr11_110581839_110583883	0.078125	0.0415039	-0.0366211	4216.5	-0.211611	3281	408	83	0.0023629	2.62655	-2.62655	3217	0.0104736	chr11	110581839	110583883	24422633	FALSE	TRUE
chr11_111169304_111170428	0.17627	0.207275	0.0310059	17074.5	-0.01489	10076.5	407	83	0.830941	0.08043	-0.08043	10066	0.907793	chr11	111169304	111170428	23836088	FALSE	FALSE
chr11_111383168_111383892	0.421875	0.287598	-0.134277	1941.5	-0.0646589	7601	394	82	0.356918	0.447431	-0.447431	7602	0.55066	chr11	111383168	111383892	23622624	FALSE	TRUE
chr11_111410932_111412199	0.471924	0.214478	-0.257324	565.5	-0.215823	3199	400	82	0.0020694	2.68416	-2.68416	3165	0.00934496	chr11	111410932	111412199	23594317	FALSE	FALSE
chr11_111472723_111473939	0.0107346	0.00998688	-0.000747681	9692	0.0158296	11692	406	82	0.821351	0.0854714	0.0854714	11692	0.902058	chr11	111472723	111473939	23532577	FALSE	FALSE
chr11_111636594_111637214	0.00473404	0.00814819	0.00341415	14709	0.161365	17101	401	82	0.0204834	1.6886	1.6886	17121	0.0644245	chr11	111636594	111637214	23369302	FALSE	FALSE
chr11_111741953_111742292	0	0	0	10903.5	-0.0825771	6840	321	69	0.240257	0.619324	-0.619324	6848	0.424333	chr11	111741953	111742292	23264224	FALSE	FALSE
chr11_111749570_111750078	0.00523758	0.00514221	-9.53674e-05	10714	0.0167152	11738	402	82	0.811661	0.0906256	0.0906256	11730	0.89618	chr11	111749570	111750078	23256438	FALSE	FALSE
chr11_111807607_111808203	0.0225983	0.0169525	-0.00564575	6864	-0.138629	4977	401	83	0.0467331	1.33038	-1.33038	4939	0.125876	chr11	111807607	111808203	23198313	FALSE	FALSE
chr11_111847927_111848401	0.0701904	0.0390015	-0.031189	4449	-0.129363	5229	393	81	0.0666786	1.17601	-1.17601	5244	0.166639	chr11	111847927	111848401	23158115	FALSE	FALSE
chr11_111895576_111896447	0.00754166	0.0117874	0.00424576	14986	0.244568	17995	403	82	0.000476726	3.32173	3.32173	17996	0.00266228	chr11	111895576	111896447	23110069	FALSE	FALSE
chr11_112097022_112097547	0.00522614	0.00556183	0.000335693	11482.5	0.0212342	11990	398	82	0.761999	0.118046	0.118046	11995	0.867944	chr11	112097022	112097547	22908969	FALSE	FALSE
chr11_112160815_112161201	0.00816345	0.00990295	0.0017395	13551	0.0676432	14340	384	80	0.33964	0.468981	0.468981	14301	0.533314	chr11	112160815	112161201	22845315	FALSE	FALSE
chr11_112832524_112834490	0.39917	0.0858154	-0.313477	283	-0.328748	1380	402	83	2.38677e-06	5.62219	-5.62219	1334	2.72342e-05	chr11	112832524	112834490	22172026	FALSE	TRUE
chr11_113185332_113185663	0.00693512	0.0087204	0.00178528	13596	0.0144666	11630	390	81	0.83762	0.0769529	0.0769529	11626	0.911601	chr11	113185332	113185663	21820853	FALSE	FALSE
chr11_113345068_113346328	0.0964966	0.0674438	-0.0290527	4530.5	-0.20553	3406	407	83	0.00315354	2.5012	-2.5012	3356	0.0133525	chr11	113345068	113346328	21660188	FALSE	TRUE
chr11_113644299_113644657	0.00286865	0.0014925	-0.00137615	8998	-0.0554596	8007	386	81	0.420569	0.376162	-0.376162	7943	0.612689	chr11	113644299	113644657	21361859	FALSE	FALSE
chr11_113745816_113746693	0.00859833	0.00901794	0.000419617	11640.5	-0.00268744	10716	399	83	0.969578	0.0134172	-0.0134172	10715	0.984822	chr11	113745816	113746693	21259823	FALSE	FALSE
chr11_113906920_113907332	0.0617065	0.0297546	-0.0319519	4415	-0.275879	2163	389	82	8.55716e-05	4.06767	-4.06767	2148	0.000593364	chr11	113906920	113907332	21099184	FALSE	FALSE
chr11_113929633_113932190	0.0858154	0.0828247	-0.00299072	7859	-0.0309139	9227	410	83	0.657053	0.1824	-0.1824	9218	0.797987	chr11	113929633	113932190	21074326	FALSE	TRUE
chr11_114069863_114070117	0.913086	0.837402	-0.0756836	3065.5	-0.217647	3162	272	55	0.0107444	1.96882	-1.96882	3969	0.0376133	chr11	114069863	114070117	20936399	FALSE	TRUE
chr11_114270799_114271690	0.00500107	0.00537872	0.000377655	11565.5	0.0202926	11944	393	80	0.77427	0.111108	0.111108	11934	0.876115	chr11	114270799	114271690	20734826	FALSE	FALSE
chr11_114310001_114310586	0.0541992	0.0464478	-0.00775146	6401	-0.174041	4106	409	82	0.0128309	1.89174	-1.89174	4080	0.0435584	chr11	114310001	114310586	20695930	FALSE	FALSE
chr11_115024607_115024944	0.784668	0.818359	0.0336914	17153	0.00644789	11211	373	79	0.92842	0.0322555	0.0322555	11200	0.9644	chr11	115024607	115024944	19981572	FALSE	TRUE
chr11_115373574_115375881	0.030365	0.0258942	-0.00447083	7232	-0.140887	4906	408	83	0.0429618	1.36692	-1.36692	4863	0.117801	chr11	115373574	115375881	19630635	FALSE	FALSE
chr11_115529997_115530548	0.359619	0.26709	-0.0925293	2707	-0.153024	4565	396	82	0.0291218	1.53578	-1.53578	4552	0.0863469	chr11	115529997	115530548	19475968	FALSE	TRUE
chr11_1155476_1155861	0.801758	0.558105	-0.243652	670.5	-0.425501	423	378	81	1.8293e-09	8.73771	-8.73771	435	6.56586e-08	chr11	1155476	1155861	1155476	TRUE	TRUE
chr11_115630398_115631117	0.513184	0.325928	-0.187256	1222	-0.194656	3660	393	82	0.00554213	2.25632	-2.25632	3636	0.0215073	chr11	115630398	115631117	19375399	FALSE	TRUE
chr11_116371182_116371606	0.314453	0.244629	-0.0698242	3229.5	-0.185133	3865	387	82	0.00842803	2.07427	-2.07427	3859	0.03049	chr11	116371182	116371606	18634910	FALSE	TRUE
chr11_11642121_11643819	0.0175171	0.0294342	0.0119171	16111	0.0938584	15428	410	83	0.177381	0.751093	0.751093	15458	0.34346	chr11	11642121	11643819	11642121	FALSE	TRUE
chr11_116450659_116451912	0.378906	0.396973	0.0180664	16541	-0.0566471	7941.5	409	83	0.415789	0.381127	-0.381127	7923	0.607993	chr11	116450659	116451912	18554604	FALSE	TRUE
chr11_116643309_116643892	0.0141907	0.0136337	-0.000556946	9951.5	0.0212734	11991	403	82	0.761576	0.118287	0.118287	11998	0.867753	chr11	116643309	116643892	18362624	FALSE	FALSE
chr11_116658411_116658895	0.00381851	0.00520325	0.00138474	13112	0.129939	16515	400	82	0.0629546	1.20097	1.20097	16525	0.159222	chr11	116658411	116658895	18347621	FALSE	FALSE
chr11_116968849_116969512	0.0292053	0.0226135	-0.0065918	6637	-0.139843	4937	402	83	0.0446771	1.34992	-1.34992	4905	0.121385	chr11	116968849	116969512	18037004	FALSE	FALSE
chr11_117014699_117015560	0.0296326	0.0245361	-0.00509644	7032	-0.0872017	6679	408	83	0.21029	0.677181	-0.677181	6645	0.386881	chr11	117014699	117015560	17990956	FALSE	FALSE
chr11_117049399_117050234	0.0155792	0.0222778	0.00669861	15515	0.165043	17157	403	82	0.0184123	1.73489	1.73489	17164	0.0589293	chr11	117049399	117050234	17956282	FALSE	FALSE
chr11_117102742_117103452	0.0122604	0.0123367	7.62939e-05	11076	0.00576483	11175	395	83	0.934478	0.0294307	0.0294307	11176	0.967424	chr11	117102742	117103452	17903064	FALSE	FALSE
chr11_117186344_117186979	0.0274048	0.017868	-0.00953674	6042.5	-0.187853	3796	406	82	0.00726508	2.13876	-2.13876	3782	0.0269121	chr11	117186344	117186979	17819537	FALSE	FALSE
chr11_117198423_117198950	0.00406265	0.00398254	-8.01086e-05	10736	0.0348256	12724	395	82	0.616938	0.209759	0.209759	12741	0.769878	chr11	117198423	117198950	17807566	FALSE	FALSE
chr11_117651216_117651429	0.771484	0.45459	-0.316895	269.5	-0.425932	420	389	80	1.94129e-09	8.71191	-8.71191	442	6.87561e-08	chr11	117651216	117651429	17355087	FALSE	TRUE
chr11_117666634_117668141	0.244751	0.198975	-0.0457764	3882	-0.142316	4867	410	83	0.0408094	1.38924	-1.38924	4819	0.113141	chr11	117666634	117668141	17338375	FALSE	TRUE
chr11_117856638_117857298	0.100586	0.105835	0.00524902	15260.5	0.0280047	12362	410	83	0.687563	0.162687	0.162687	12373	0.818904	chr11	117856638	117857298	17149218	FALSE	FALSE
chr11_118016237_118016984	0.104919	0.13269	0.027771	16964	0.137355	16677	407	83	0.0485044	1.31422	1.31422	16694	0.129456	chr11	118016237	118016984	16989532	FALSE	FALSE
chr11_118023352_118024194	0.0649414	0.0455627	-0.0193787	5060	-0.162531	4342	402	83	0.0196942	1.70566	-1.70566	4314	0.06234	chr11	118023352	118024194	16982322	FALSE	FALSE
chr11_118272261_118272546	0.00899506	0.00759888	-0.00139618	8991	-0.043945	8591	401	82	0.530663	0.275182	-0.275182	8587	0.703543	chr11	118272261	118272546	16733970	FALSE	FALSE
chr11_118305422_118307705	0.0201569	0.0186157	-0.00154114	8837.5	-0.0573905	7913	410	83	0.409595	0.387645	-0.387645	7896	0.60218	chr11	118305422	118307705	16698811	FALSE	FALSE
chr11_118401235_118402069	0.0249939	0.0546265	0.0296326	17041	0.226992	17845	407	83	0.00111099	2.95429	2.95429	17860	0.00549222	chr11	118401235	118402069	16604447	FALSE	FALSE
chr11_118443087_118443631	0.00485992	0.00706482	0.0022049	13983.5	0.110506	15994.5	407	83	0.112324	0.949528	0.949528	16017	0.2464	chr11	118443087	118443631	16562885	FALSE	FALSE
chr11_118478235_118481896	0.207642	0.246216	0.0385742	17291	0.110319	15986	409	83	0.11293	0.94719	0.94719	16010	0.247324	chr11	118478235	118481896	16524620	FALSE	TRUE
chr11_11863272_11864018	0.00534439	0.00497055	-0.00037384	10244.5	-0.00620215	10510	406	83	0.929319	0.031835	-0.031835	10508	0.964598	chr11	11863272	11864018	11863272	FALSE	FALSE
chr11_118661305_118663026	0.0866089	0.098877	0.0122681	16145.5	0.0372762	12852	406	82	0.594516	0.225836	0.225836	12852	0.753058	chr11	118661305	118663026	16343490	FALSE	FALSE
chr11_118781060_118781732	0.0253906	0.0138092	-0.0115814	5781	-0.278147	2134	406	83	6.4722e-05	4.18895	-4.18895	2078	0.000466217	chr11	118781060	118781732	16224784	FALSE	FALSE
chr11_118795950_118796819	0.0317383	0.0332642	0.00152588	13314	0.0532376	13668	406	83	0.444678	0.351955	0.351955	13681	0.633105	chr11	118795950	118796819	16209697	FALSE	FALSE
chr11_118842379_118842933	0.649414	0.577148	-0.0722656	3159	-0.385807	720	410	83	2.92548e-08	7.5338	-7.5338	692	6.50972e-07	chr11	118842379	118842933	16163583	FALSE	TRUE
chr11_118888878_118890115	0.00661087	0.00740051	0.000789642	12244.5	0.0853684	15100	409	83	0.219976	0.657624	0.657624	15119	0.398893	chr11	118888878	118890115	16116401	FALSE	FALSE
chr11_118900986_118901749	0.0129776	0.0208435	0.00786591	15696	0.138229	16699	407	81	0.0493419	1.30678	1.30678	16686	0.131317	chr11	118900986	118901749	16104767	FALSE	FALSE
chr11_118927374_118928412	0.00940704	0.0116653	0.0022583	14025.5	0.0437012	13174	402	81	0.534841	0.271776	0.271776	13163	0.706833	chr11	118927374	118928412	16078104	FALSE	FALSE
chr11_118938193_118938815	0.00518417	0.00509262	-9.15527e-05	10721	-0.00699026	10469	403	82	0.920799	0.0358353	-0.0358353	10469	0.96037	chr11	118938193	118938815	16067701	FALSE	FALSE
chr11_118955574_118955832	0.00892639	0.00927734	0.000350952	11513	0.0645878	14200	395	82	0.356479	0.447966	0.447966	14198	0.550255	chr11	118955574	118955832	16050684	FALSE	FALSE
chr11_118965017_118966464	0.0281372	0.0256195	-0.0025177	8124	-0.125918	5333	410	83	0.0703359	1.15282	-1.15282	5298	0.173193	chr11	118965017	118966464	16040052	FALSE	FALSE
chr11_118977878_118978785	0.0112305	0.0118179	0.000587463	11933.5	0.0311643	12530	404	83	0.65486	0.183852	0.183852	12543	0.796511	chr11	118977878	118978785	16027731	FALSE	FALSE
chr11_118991886_118992751	0.0033989	0.00476837	0.00136948	13096	0.070772	14489	405	83	0.309203	0.509756	0.509756	14519	0.502666	chr11	118991886	118992751	16013765	FALSE	FALSE
chr11_119019643_119020887	0.241577	0.209473	-0.0321045	4411	-0.0985274	6281	405	83	0.157219	0.803496	-0.803496	6249	0.314504	chr11	119019643	119020887	15985629	FALSE	TRUE
chr11_119039429_119039944	0.0103149	0.0093689	-0.000946045	9482.5	-0.0276606	9392	399	82	0.693343	0.159052	-0.159052	9387	0.82312	chr11	119039429	119039944	15966572	FALSE	FALSE
chr11_119076641_119077277	0.00869751	0.00565338	-0.00304413	7833.5	-0.0731396	7243	392	82	0.294998	0.53018	-0.53018	7227	0.486401	chr11	119076641	119077277	15929239	FALSE	FALSE
chr11_119186947_119187894	0.0496216	0.029541	-0.0200806	4996	-0.275617	2173	404	83	7.59452e-05	4.1195	-4.1195	2118	0.000534526	chr11	119186947	119187894	15818622	FALSE	FALSE
chr11_119191535_119192182	0.145264	0.0688477	-0.076416	3050	-0.171006	4168	400	82	0.0146706	1.83355	-1.83355	4158	0.0487183	chr11	119191535	119192182	15814334	FALSE	FALSE
chr11_119205023_119205568	0.00520706	0.00252724	-0.00267982	8054	-0.0971261	6324	363	74	0.174385	0.758492	-0.758492	6376	0.339175	chr11	119205023	119205568	15800948	FALSE	FALSE
chr11_119210290_119211658	0.383301	0.364258	-0.019043	5088.5	-0.100789	6220	408	82	0.149699	0.824781	-0.824781	6185	0.303808	chr11	119210290	119211658	15794858	FALSE	FALSE
chr11_119234480_119235214	0.131104	0.139893	0.00878906	15809	0.0363533	12806	404	83	0.602006	0.220399	0.220399	12817	0.758834	chr11	119234480	119235214	15771302	FALSE	TRUE
chr11_119252130_119252564	0.00805664	0.00759888	-0.000457764	10127.5	-0.0251407	9511	390	82	0.719468	0.142988	-0.142988	9508	0.840469	chr11	119252130	119252564	15753952	FALSE	FALSE
chr11_119293320_119293943	0.448486	0.268555	-0.179932	1307.5	-0.267818	2292	402	83	0.000121472	3.91552	-3.91552	2242	0.000804632	chr11	119293320	119293943	15712573	FALSE	TRUE
chr11_119455153_119456102	0.0501404	0.0415039	-0.00863647	6221.5	-0.025152	9510	402	81	0.721168	0.141963	-0.141963	9513	0.841805	chr11	119455153	119456102	15550414	FALSE	FALSE
chr11_119535559_119535992	0.920898	0.888672	-0.0322266	4401.5	-0.188469	3786	371	77	0.00922629	2.03497	-2.03497	3899	0.032983	chr11	119535559	119535992	15470524	FALSE	TRUE
chr11_119598382_119600157	0.0341187	0.0303955	-0.00372314	7542	-0.0532252	8123.5	407	83	0.44472	0.351913	-0.351913	8104	0.633105	chr11	119598382	119600157	15406359	FALSE	FALSE
chr11_120008046_120008710	0.637695	0.384033	-0.253662	594.5	-0.27724	2146	398	82	7.65385e-05	4.11612	-4.11612	2120	0.000538298	chr11	120008046	120008710	14997806	FALSE	TRUE
chr11_120039601_120040210	0.032959	0.0227203	-0.0102386	5947	-0.121898	5458	388	81	0.0842021	1.07468	-1.07468	5470	0.198767	chr11	120039601	120040210	14966306	FALSE	FALSE
chr11_120081487_120082345	0.019989	0.0147934	-0.00519562	7003	-0.102781	6140	405	83	0.140047	0.853725	-0.853725	6109	0.28917	chr11	120081487	120082345	14924171	FALSE	FALSE
chr11_120195805_120196372	0.014946	0.0115814	-0.00336456	7700	-0.078714	6995	396	82	0.261774	0.582073	-0.582073	7002	0.448633	chr11	120195805	120196372	14810144	FALSE	FALSE
chr11_120206460_120207649	0.0116959	0.0120392	0.000343323	11498.5	0.0304626	12490	405	83	0.662074	0.179094	0.179094	12494	0.800866	chr11	120206460	120207649	14798867	FALSE	FALSE
chr11_12029737_12030841	0.187378	0.151245	-0.0361328	4235	-0.121062	5485	397	81	0.085862	1.0662	-1.0662	5484	0.201922	chr11	12029737	12030841	12029737	FALSE	TRUE
chr11_120381877_120382935	0.0786133	0.0679932	-0.0106201	5889	-0.137749	5001	406	81	0.0502113	1.2992	-1.2992	5004	0.133177	chr11	120381877	120382935	14623581	FALSE	FALSE
chr11_120434822_120435940	0.443115	0.38623	-0.0568848	3564	-0.189201	3770	405	83	0.00659524	2.18077	-2.18077	3718	0.0248979	chr11	120434822	120435940	14570576	FALSE	TRUE
chr11_120856725_120857174	0.0480042	0.0523987	0.00439453	15036	0.0228161	12083	395	81	0.746514	0.126962	0.126962	12075	0.858712	chr11	120856725	120857174	14149342	FALSE	FALSE
chr11_120894689_120895082	0.0166931	0.0117798	-0.00491333	7074.5	-0.169115	4216	383	83	0.0154285	1.81168	-1.81168	4197	0.0507405	chr11	120894689	120895082	14111434	FALSE	FALSE
chr11_121163244_121163952	0.00344849	0.00458145	0.00113297	12774	0.0462541	13313	391	82	0.497953	0.302812	0.302812	13383	0.678034	chr11	121163244	121163952	13842564	FALSE	FALSE
chr11_121233742_121233995	0.626465	0.557129	-0.0693359	3242	-0.219236	3124	397	82	0.00176739	2.75267	-2.75267	3098	0.00816012	chr11	121233742	121233995	13772521	FALSE	TRUE
chr11_12131813_12133016	0.0369873	0.0310364	-0.00595093	6777	-0.076135	7112	401	83	0.274841	0.560918	-0.560918	7082	0.464079	chr11	12131813	12133016	12131813	FALSE	FALSE
chr11_121322538_121323302	0.0154419	0.0285797	0.0131378	16218	0.295747	18283	404	83	2.17793e-05	4.66196	4.66196	18287	0.000182078	chr11	121322538	121323302	13683214	FALSE	FALSE
chr11_1215375_1215986	0.806641	0.680664	-0.125977	2085	-0.366202	915	388	81	2.14544e-07	6.66848	-6.66848	923	3.53846e-06	chr11	1215375	1215986	1215375	TRUE	TRUE
chr11_1221571_1221863	0.703125	0.495117	-0.208008	1001.5	-0.26265	2379	386	81	0.000200838	3.69715	-3.69715	2386	0.00124682	chr11	1221571	1221863	1221571	TRUE	TRUE
chr11_122526278_122527479	0.0129013	0.0094986	-0.00340271	7686.5	-0.125448	5354	410	83	0.0713901	1.14636	-1.14636	5314	0.17512	chr11	122526278	122527479	12479037	FALSE	FALSE
chr11_122753386_122753951	0.0303802	0.0240326	-0.00634766	6694	-0.127401	5283	397	83	0.0677923	1.16882	-1.16882	5259	0.16859	chr11	122753386	122753951	12252565	FALSE	FALSE
chr11_122847494_122848608	0.416504	0.190674	-0.22583	821.5	-0.282454	2049	397	82	5.61324e-05	4.25079	-4.25079	2030	0.000413403	chr11	122847494	122848608	12157908	FALSE	TRUE
chr11_122852411_122852699	0.199951	0.125	-0.0749512	3078.5	-0.153167	4559	397	83	0.0281374	1.55072	-1.55072	4528	0.083973	chr11	122852411	122852699	12153817	FALSE	TRUE
chr11_122854930_122855582	0.0614014	0.02948	-0.0319214	4416	-0.336816	1278	391	82	1.59076e-06	5.79839	-5.79839	1255	1.92536e-05	chr11	122854930	122855582	12150934	FALSE	TRUE
chr11_1228751_1229024	0.674805	0.489502	-0.185303	1246.5	-0.309774	1647	401	82	9.7776e-06	5.00977	-5.00977	1627	9.06e-05	chr11	1228751	1229024	1228751	TRUE	TRUE
chr11_122932173_122933803	0.00798035	0.00782776	-0.000152588	10620	0.0553215	13773	409	83	0.426788	0.369788	0.369788	13788	0.617952	chr11	122932173	122933803	12072713	FALSE	FALSE
chr11_123065426_123066184	0.0435791	0.028595	-0.0149841	5419	-0.183204	3906	403	83	0.00855418	2.06782	-2.06782	3865	0.0309046	chr11	123065426	123066184	11940332	FALSE	TRUE
chr11_123066517_123066986	0.727051	0.78125	0.0541992	17583	0.0708869	14494	337	72	0.345091	0.462066	0.462066	14273	0.539293	chr11	123066517	123066986	11939530	FALSE	TRUE
chr11_123172454_123173104	0.198364	0.177246	-0.0211182	4938	-0.0933833	6457	397	82	0.182995	0.73756	-0.73756	6448	0.350693	chr11	123172454	123173104	11833412	FALSE	TRUE
chr11_123229125_123229472	0.432129	0.209473	-0.222656	845.5	-0.27633	2158	393	82	8.22701e-05	4.08476	-4.08476	2138	0.000573016	chr11	123229125	123229472	11777044	FALSE	TRUE
chr11_123301049_123302149	0.178955	0.0687866	-0.110168	2345.5	-0.161373	4370	396	83	0.0207515	1.68295	-1.68295	4350	0.0651365	chr11	123301049	123302149	11704367	FALSE	TRUE
chr11_123448093_123448382	0.641602	0.536133	-0.105469	2447.5	-0.28375	2029	400	82	5.13007e-05	4.28988	-4.28988	2002	0.000382936	chr11	123448093	123448382	11558134	FALSE	TRUE
chr11_123524733_123525685	0.0804443	0.0908813	0.010437	15984.5	0.0860543	15126	407	83	0.216499	0.664544	0.664544	15152	0.394786	chr11	123524733	123525685	11480831	FALSE	FALSE
chr11_123611898_123612545	0.0682373	0.0682373	0	10903.5	-0.00590184	10532	405	82	0.933137	0.0300547	-0.0300547	10530	0.966674	chr11	123611898	123612545	11393971	FALSE	FALSE
chr11_12398965_12399863	0.021225	0.0157776	-0.00544739	6909.5	-0.132812	5134	393	82	0.0584215	1.23343	-1.23343	5139	0.150169	chr11	12398965	12399863	12398965	FALSE	FALSE
chr11_124492664_124493153	0.0108948	0.00762939	-0.00326538	7737.5	-0.0719145	7291	398	82	0.304892	0.515854	-0.515854	7286	0.497731	chr11	124492664	124493153	10513363	FALSE	FALSE
chr11_124543384_124544046	0.0119934	0.0098877	-0.00210571	8376	-0.0894279	6604	402	80	0.206386	0.685319	-0.685319	6623	0.381572	chr11	124543384	124544046	10462470	FALSE	FALSE
chr11_124609552_124610471	0.00791168	0.00943756	0.00152588	13314	0.0392246	12952	402	82	0.574061	0.241042	0.241042	12965	0.737797	chr11	124609552	124610471	10396045	FALSE	FALSE
chr11_124615389_124617006	0.35083	0.399658	0.0488281	17504	0.177377	17331	400	81	0.0117852	1.92866	1.92866	17328	0.0406568	chr11	124615389	124617006	10389510	FALSE	TRUE
chr11_124628367_124629590	0.431641	0.472412	0.0407715	17339.5	0.0779822	14777	403	82	0.26556	0.575837	0.575837	14780	0.453104	chr11	124628367	124629590	10376926	FALSE	FALSE
chr11_124632063_124633239	0.0237274	0.0826416	0.0588989	17659	0.472497	18692	405	83	1.16051e-11	10.9354	10.9354	18693	1.002e-09	chr11	124632063	124633239	10373277	FALSE	FALSE
chr11_124669377_124670519	0.0223694	0.0219574	-0.000411987	10189	0.0425933	13112	408	82	0.542825	0.26534	0.26534	13112	0.712543	chr11	124669377	124670519	10335997	FALSE	FALSE
chr11_124709222_124709957	0.0968018	0.0796509	-0.0171509	5226.5	-0.0914881	6525	401	83	0.189428	0.722557	-0.722557	6498	0.359186	chr11	124709222	124709957	10296559	FALSE	FALSE
chr11_124713005_124713395	0.140991	0.0661621	-0.0748291	3082	-0.179957	3968	392	81	0.0107184	1.96987	-1.96987	3967	0.0375366	chr11	124713005	124713395	10293121	FALSE	TRUE
chr11_124735069_124736465	0.244141	0.146851	-0.09729	2608	-0.242626	2680	406	83	0.000492933	3.30721	-3.30721	2626	0.00274135	chr11	124735069	124736465	10270051	FALSE	TRUE
chr11_124745909_124746773	0.0665283	0.0591431	-0.00738525	6467.5	-0.0402409	8772	407	82	0.565429	0.247622	-0.247622	8761	0.730527	chr11	124745909	124746773	10259743	FALSE	FALSE
chr11_124790814_124791354	0.517578	0.560059	0.0424805	17381.5	0.010766	11436	388	79	0.880406	0.0553171	0.0553171	11424	0.93654	chr11	124790814	124791354	10215162	FALSE	FALSE
chr11_124823793_124824329	0.00427246	0.0050621	0.000789642	12244.5	0.0321482	12583	407	83	0.64425	0.190946	0.190946	12601	0.789368	chr11	124823793	124824329	10182187	FALSE	FALSE
chr11_124932730_124933657	0.0368042	0.0248108	-0.0119934	5721	-0.215478	3207	399	83	0.00199699	2.69962	-2.69962	3152	0.00906044	chr11	124932730	124933657	10072859	FALSE	FALSE
chr11_124981319_124981769	0.00431824	0.00453186	0.000213623	11284.5	0.0160134	11697	395	83	0.817783	0.0873618	0.0873618	11702	0.899758	chr11	124981319	124981769	10024747	FALSE	FALSE
chr11_125034243_125034495	0.0421143	0.018219	-0.0238953	4791	-0.157043	4470	392	82	0.0252319	1.59805	-1.59805	4460	0.0767817	chr11	125034243	125034495	9972021	TRUE	FALSE
chr11_125034896_125036426	0.223511	0.0796509	-0.143799	1793.5	-0.383944	741	407	83	3.47646e-08	7.45886	-7.45886	708	7.54751e-07	chr11	125034896	125036426	9970090	TRUE	TRUE
chr11_125365137_125366319	0.127441	0.0683594	-0.059082	3502.5	-0.223597	3033	406	82	0.0013978	2.85456	-2.85456	3006	0.006669	chr11	125365137	125366319	9640197	TRUE	TRUE
chr11_125439122_125439730	0.00421906	0.0038929	-0.000326157	10318	0.0768827	14737	400	81	0.27397	0.562297	0.562297	14725	0.462896	chr11	125439122	125439730	9566786	TRUE	FALSE
chr11_125462323_125462884	0.00458908	0.0047226	0.000133514	11161	0.0698613	14444	397	83	0.315577	0.500895	0.500895	14461	0.508352	chr11	125462323	125462884	9543632	TRUE	FALSE
chr11_125495233_125495866	0.0135498	0.0156555	0.00210571	13894.5	0.000980512	10905	398	82	0.989179	0.00472498	0.00472498	10907	0.99449	chr11	125495233	125495866	9510650	TRUE	FALSE
chr11_125757055_125758107	0.0293579	0.0187073	-0.0106506	5887	-0.0451524	8539	400	82	0.519541	0.28438	-0.28438	8535	0.694798	chr11	125757055	125758107	9248409	TRUE	FALSE
chr11_125774292_125774584	0.633301	0.353516	-0.279785	426	-0.343198	1200	373	78	1.85419e-06	5.73185	-5.73185	1288	2.18858e-05	chr11	125774292	125774584	9231932	TRUE	TRUE
chr11_125932082_125933003	0.0102081	0.00888062	-0.00132751	9040.5	-0.0698016	7387	402	83	0.316659	0.499408	-0.499408	7365	0.509351	chr11	125932082	125933003	9073513	TRUE	FALSE
chr11_126081369_126082028	0.00395584	0.00384903	-0.000106812	10698.5	0.0375532	12861	402	83	0.589419	0.229576	0.229576	12871	0.748905	chr11	126081369	126082028	8924488	TRUE	FALSE
chr11_126138359_126139166	0.00808716	0.00677872	-0.00130844	9064	-0.0429996	8633	406	83	0.537031	0.27	-0.27	8614	0.708579	chr11	126138359	126139166	8867350	TRUE	FALSE
chr11_126152722_126153400	0.0304565	0.0353394	0.00488281	15168	0.0558679	13793	405	83	0.42262	0.37405	0.37405	13810	0.614577	chr11	126152722	126153400	8853116	TRUE	FALSE
chr11_1262083_1262598	0.817383	0.700684	-0.116699	2228	-0.261217	2396	395	83	0.000182066	3.73977	-3.73977	2362	0.00114163	chr11	1262083	1262598	1262083	TRUE	TRUE
chr11_126225355_126226073	0.0246277	0.0200348	-0.0045929	7194	-0.104398	6081	409	83	0.133595	0.874209	-0.874209	6048	0.279388	chr11	126225355	126226073	8780443	TRUE	FALSE
chr11_126286451_126286870	0.605469	0.781738	0.17627	18428.5	0.223761	17813	385	81	0.00154166	2.81201	2.81201	17798	0.0072629	chr11	126286451	126286870	8719646	TRUE	TRUE
chr11_126870226_126870552	0.20459	0.0539856	-0.150635	1693.5	-0.285006	2012	386	81	5.47307e-05	4.26177	-4.26177	2020	0.00040499	chr11	126870226	126870552	8135964	TRUE	TRUE
chr11_126873091_126873809	0.169922	0.159546	-0.010376	5916	-0.0519248	8182.5	410	83	0.455648	0.34137	-0.34137	8161	0.642945	chr11	126873091	126873809	8132707	TRUE	TRUE
chr11_12695414_12696981	0.0206757	0.0197144	-0.000961304	9462	-0.0373316	8908	406	83	0.592101	0.227604	-0.227604	8895	0.750938	chr11	12695414	12696981	12695414	FALSE	FALSE
chr11_127338_127777	0.833984	0.745117	-0.0888672	2783.5	-0.413363	507	403	82	3.56017e-09	8.44853	-8.44853	493	1.13441e-07	chr11	127338	127777	127338	TRUE	TRUE
chr11_128391712_128392611	0.0447998	0.0397339	-0.00506592	7037.5	-0.0957577	6370	403	83	0.1694	0.771086	-0.771086	6332	0.332448	chr11	128391712	128392611	6613905	TRUE	TRUE
chr11_128419198_128419513	0.89209	0.890625	-0.00146484	8916.5	0.0441021	13199	391	82	0.530124	0.275622	0.275622	13193	0.703129	chr11	128419198	128419513	6587003	TRUE	TRUE
chr11_128560103_128560537	0.431885	0.501465	0.0695801	17801.5	0.118143	16198	407	83	0.089715	1.04713	1.04713	16214	0.2086	chr11	128560103	128560537	6445979	TRUE	TRUE
chr11_128562671_128565011	0.278564	0.151855	-0.126709	2070	-0.296421	1837	408	83	2.05293e-05	4.68762	-4.68762	1779	0.00017326	chr11	128562671	128565011	6441505	TRUE	TRUE
chr11_128694084_128694688	0.711426	0.632812	-0.0786133	2997	-0.121104	5484	403	82	0.0837681	1.07692	-1.07692	5466	0.197892	chr11	128694084	128694688	6311828	TRUE	TRUE
chr11_128760441_128761233	0.0690918	0.0609436	-0.00814819	6311.5	-0.130784	5200	407	83	0.0603125	1.21959	-1.21959	5171	0.153806	chr11	128760441	128761233	6245283	TRUE	TRUE
chr11_129148497_129149917	0.0241089	0.0267792	0.00267029	14327.5	-0.0188951	9818	410	83	0.786231	0.10445	-0.10445	9808	0.883627	chr11	129148497	129149917	5856599	TRUE	FALSE
chr11_129242958_129243457	0.642578	0.282227	-0.360352	136	-0.288997	1953	397	82	3.7584e-05	4.425	-4.425	1936	0.000291102	chr11	129242958	129243457	5763059	TRUE	TRUE
chr11_129243998_129244567	0.174683	0.113159	-0.0615234	3436	-0.131809	5168	405	81	0.0610238	1.2145	-1.2145	5174	0.155366	chr11	129243998	129244567	5761949	TRUE	TRUE
chr11_129245108_129246395	0.0278473	0.0419922	0.0141449	16293	0.211856	17711	403	82	0.00248239	2.60513	2.60513	17716	0.010923	chr11	129245108	129246395	5760121	TRUE	TRUE
chr11_1293162_1294071	0.859375	0.847656	-0.0117188	5752	-0.0933048	6460	404	82	0.182703	0.738254	-0.738254	6441	0.35043	chr11	1293162	1294071	1293162	TRUE	TRUE
chr11_129685737_129686211	0.0507202	0.129517	0.0787964	17894	0.217227	17759	393	81	0.00207002	2.68402	2.68402	17752	0.00934553	chr11	129685737	129686211	5320305	TRUE	FALSE
chr11_129765145_129765617	0.0198059	0.0140381	-0.00576782	6835.5	-0.121207	5478	399	83	0.0820819	1.08575	-1.08575	5446	0.194842	chr11	129765145	129765617	5240899	TRUE	FALSE
chr11_129871690_129873423	0.01297	0.0102539	-0.00271606	8030.5	-0.0672892	7485	400	83	0.334613	0.475457	-0.475457	7470	0.528076	chr11	129871690	129873423	5133093	TRUE	FALSE
chr11_129910305_129910950	0.941406	0.921875	-0.0195312	5048	-0.195059	3646	389	82	0.00548442	2.26087	-2.26087	3632	0.0213143	chr11	129910305	129910950	5095566	TRUE	TRUE
chr11_129938936_129940798	0.013588	0.016983	0.00339508	14704	0.14017	16731	410	83	0.0439412	1.35713	1.35713	16755	0.119872	chr11	129938936	129940798	5065718	TRUE	FALSE
chr11_130029658_130030262	0.0438843	0.124634	0.0807495	17904	0.309286	18344	410	83	8.75765e-06	5.05761	5.05761	18347	8.23299e-05	chr11	130029658	130030262	4976254	TRUE	TRUE
chr11_130079199_130079641	0.901855	0.618164	-0.283691	407.5	-0.508872	87	398	81	5.09025e-13	12.2933	-12.2933	90	8.59198e-11	chr11	130079199	130079641	4926875	TRUE	TRUE
chr11_130183948_130184668	0.0289764	0.0394287	0.0104523	15988	0.167808	17200	403	83	0.0160218	1.79529	1.79529	17223	0.05237	chr11	130183948	130184668	4821848	TRUE	FALSE
chr11_130297401_130298517	0.0689697	0.0585632	-0.0104065	5912	-0.114769	5709	407	83	0.0992648	1.0032	-1.0032	5663	0.225137	chr11	130297401	130298517	4707999	TRUE	TRUE
chr11_13030330_13032584	0.103821	0.256104	0.152344	18351	0.188524	17465	400	83	0.00685108	2.16424	2.16424	17481	0.0256723	chr11	13030330	13032584	13030330	FALSE	TRUE
chr11_130318234_130320198	0.115356	0.178955	0.0635986	17724.5	0.132148	16576	410	83	0.0575248	1.24015	1.24015	16594	0.148373	chr11	130318234	130320198	4686318	TRUE	TRUE
chr11_130342956_130343652	0.851562	0.828125	-0.0234375	4807.5	-0.0647445	7596	398	82	0.355855	0.448727	-0.448727	7595	0.549699	chr11	130342956	130343652	4662864	TRUE	TRUE
chr11_130786111_130786634	0.00743103	0.00713348	-0.000297546	10352	-0.0540322	8079	391	79	0.448132	0.348594	-0.348594	8120	0.636172	chr11	130786111	130786634	4219882	TRUE	TRUE
chr11_1315467_1317115	0.95459	0.943359	-0.0112305	5806.5	-0.180078	3966	398	79	0.0113986	1.94315	-1.94315	4001	0.0395576	chr11	1315467	1317115	1315467	TRUE	FALSE
chr11_131560937_131561613	0.796387	0.72998	-0.0664062	3313.5	-0.107493	5987	389	81	0.127915	0.893077	-0.893077	5997	0.270286	chr11	131560937	131561613	3444903	TRUE	TRUE
chr11_131780328_131781532	0.540039	0.098938	-0.441162	42	-0.389065	695	407	83	2.28187e-08	7.64171	-7.64171	659	5.32417e-07	chr11	131780328	131781532	3224984	TRUE	TRUE
chr11_132812662_132813075	0.474854	0.395996	-0.0788574	2992.5	-0.170966	4170	402	81	0.015164	1.81919	-1.81919	4181	0.050055	chr11	132812662	132813075	2193441	TRUE	TRUE
chr11_132813562_132814395	0.48999	0.0900879	-0.399902	73	-0.379097	789	357	80	1.14661e-07	6.94059	-6.94059	852	2.06367e-06	chr11	132813562	132814395	2192121	TRUE	FALSE
chr11_132934059_132934291	0.189575	0.0872803	-0.102295	2517	-0.389276	692	403	82	2.70742e-08	7.56744	-7.56744	683	6.10425e-07	chr11	132934059	132934291	2072225	TRUE	FALSE
chr11_132951692_132952260	0.543945	0.509766	-0.0341797	4309	-0.0698476	7384	400	82	0.318997	0.496213	-0.496213	7382	0.511487	chr11	132951692	132952260	2054256	TRUE	TRUE
chr11_132952538_132953307	0.376953	0.172363	-0.20459	1041	-0.283103	2038	401	82	5.31662e-05	4.27436	-4.27436	2013	0.000394816	chr11	132952538	132953307	2053209	TRUE	TRUE
chr11_13298796_13300735	0.0534363	0.0574951	0.00405884	14936.5	0.0248917	12195	409	83	0.720839	0.142162	0.142162	12200	0.841578	chr11	13298796	13300735	13298796	FALSE	FALSE
chr11_1330390_1331498	0.0182495	0.0359497	0.0177002	16524.5	0.223348	17808	409	83	0.00132864	2.87659	2.87659	17827	0.00640592	chr11	1330390	1331498	1330390	TRUE	FALSE
chr11_133230884_133231645	0.675293	0.434326	-0.240967	697.5	-0.360158	987	393	83	2.49396e-07	6.60311	-6.60311	956	3.98693e-06	chr11	133230884	133231645	1774871	TRUE	TRUE
chr11_133703052_133703708	0.780762	0.76709	-0.0136719	5541	-0.0519901	8179.5	393	81	0.461282	0.336034	-0.336034	8188	0.64782	chr11	133703052	133703708	1302808	TRUE	FALSE
chr11_133787971_133791268	0.770508	0.544434	-0.226074	817.5	-0.349339	1115	410	83	5.12508e-07	6.2903	-6.2903	1071	7.31887e-06	chr11	133787971	133791268	1215248	TRUE	TRUE
chr11_133825337_133827457	0.140137	0.111755	-0.0283813	4558	-0.0202762	9751	410	83	0.771004	0.112944	-0.112944	9744	0.873686	chr11	133825337	133827457	1179059	TRUE	TRUE
chr11_133906735_133907359	0.191895	0.160889	-0.0310059	4452.5	-0.0880785	6644	409	83	0.205688	0.68679	-0.68679	6617	0.380587	chr11	133906735	133907359	1099157	TRUE	TRUE
chr11_133938850_133939681	0.282471	0.0917969	-0.190674	1180.5	-0.34589	1165	405	82	7.7403e-07	6.11124	-6.11124	1142	1.03292e-05	chr11	133938850	133939681	1066835	TRUE	FALSE
chr11_133994709_133995090	0.394287	0.520508	0.126221	18230	0.0909864	15316	392	81	0.197262	0.704956	0.704956	15286	0.369258	chr11	133994709	133995090	1011426	TRUE	TRUE
chr11_134093696_134095491	0.00997162	0.0115967	0.00162506	13430.5	0.0719339	14549	407	83	0.301587	0.520587	0.520587	14560	0.493645	chr11	134093696	134095491	911025	TRUE	FALSE
chr11_134123209_134123996	0.00393295	0.00310707	-0.000825882	9604	-0.0544516	8064	397	81	0.436718	0.359799	-0.359799	8051	0.626655	chr11	134123209	134123996	882520	TRUE	FALSE
chr11_134145559_134147180	0.282715	0.235718	-0.0469971	3839.5	-0.12579	5342	404	83	0.0709782	1.14888	-1.14888	5308	0.174338	chr11	134145559	134147180	859336	TRUE	TRUE
chr11_134201784_134202407	0.0275116	0.238647	0.211182	18499	0.487927	18705	400	82	3.30985e-12	11.4802	11.4802	18704	3.7813e-10	chr11	134201784	134202407	804109	TRUE	FALSE
chr11_134211759_134212611	0.931641	0.763672	-0.167969	1450.5	-0.575837	12	399	83	1.47615e-16	15.8309	-15.8309	9	2.90877e-13	chr11	134211759	134212611	793905	TRUE	TRUE
chr11_134231727_134231958	0.908203	0.695801	-0.212402	958.5	-0.448726	293	385	79	3.25151e-10	9.48791	-9.48791	318	1.58234e-08	chr11	134231727	134231958	774558	TRUE	TRUE
chr11_134253449_134254151	0.867188	0.746582	-0.120605	2172.5	-0.393734	651	387	80	2.91677e-08	7.5351	-7.5351	689	6.50972e-07	chr11	134253449	134254151	752365	TRUE	TRUE
chr11_134281380_134282919	0.153442	0.083374	-0.0700684	3223	-0.251431	2538	404	83	0.00030677	3.51319	-3.51319	2498	0.00180573	chr11	134281380	134282919	723597	TRUE	TRUE
chr11_134632045_134632987	0.63916	0.399902	-0.239258	715	-0.383354	749	402	83	3.77097e-08	7.42355	-7.42355	721	8.04703e-07	chr11	134632045	134632987	373529	TRUE	TRUE
chr11_13484273_13485290	0.00589752	0.00928497	0.00338745	14701.5	0.0883063	15217	394	82	0.207344	0.683309	0.683309	15218	0.382855	chr11	13484273	13485290	13484273	FALSE	FALSE
chr11_1357626_1359081	0.414795	0.441895	0.0270996	16940	0.116181	16153	409	83	0.0950354	1.02211	1.02211	16175	0.217835	chr11	1357626	1359081	1357626	TRUE	TRUE
chr11_13689588_13690724	0.0168304	0.0177002	0.000869751	12381.5	0.0575999	13884.5	406	83	0.408283	0.389039	0.389039	13898	0.601099	chr11	13689588	13690724	13689588	FALSE	TRUE
chr11_13984066_13986349	0.33374	0.348389	0.0146484	16337	0.00849251	11311	410	83	0.903166	0.0442325	0.0442325	11313	0.95015	chr11	13984066	13986349	13984066	FALSE	TRUE
chr11_1404214_1404711	0.0128632	0.0116653	-0.00119781	9175.5	-0.00743326	10440	382	81	0.916182	0.0380181	-0.0380181	10444	0.957799	chr11	1404214	1404711	1404214	TRUE	FALSE
chr11_1410119_1412346	0.166138	0.125854	-0.0402832	4073	-0.115957	5659	410	83	0.0956072	1.01951	-1.01951	5618	0.218878	chr11	1410119	1412346	1410119	TRUE	TRUE
chr11_14379808_14380737	0.00940704	0.0098114	0.000404358	11612.5	-0.04363	8601	404	83	0.53131	0.274652	-0.274652	8590	0.70399	chr11	14379808	14380737	14379808	FALSE	FALSE
chr11_14402600_14403086	0.0199585	0.0207062	0.000747681	12176.5	-0.0536226	8105	396	81	0.446859	0.34983	-0.34983	8115	0.635135	chr11	14402600	14403086	14402600	FALSE	FALSE
chr11_1464295_1464899	0.570312	0.389404	-0.180908	1293	-0.225209	2997	396	82	0.00132152	2.87893	-2.87893	2976	0.00637488	chr11	1464295	1464899	1464295	TRUE	TRUE
chr11_1466304_1467210	0.852539	0.763184	-0.0893555	2773.5	-0.344652	1178	391	83	8.06064e-07	6.09363	-6.09363	1147	1.06958e-05	chr11	1466304	1467210	1466304	TRUE	FALSE
chr11_14665053_14666674	0.0261383	0.0257874	-0.000350952	10285	0.0613336	14054	408	83	0.378354	0.422101	0.422101	14075	0.572004	chr11	14665053	14666674	14665053	FALSE	FALSE
chr11_1470033_1470388	0.760742	0.542969	-0.217773	898	-0.383607	745	402	81	5.05496e-08	7.29628	-7.29628	755	1.0317e-06	chr11	1470033	1470388	1470033	TRUE	FALSE
chr11_1481778_1482644	0.648926	0.646973	-0.00195312	8493	-0.0332921	9104	389	81	0.637504	0.195517	-0.195517	9118	0.784929	chr11	1481778	1482644	1481778	TRUE	TRUE
chr11_1491197_1491525	0.913086	0.886719	-0.0263672	4648	-0.108673	5931	336	70	0.150987	0.82106	-0.82106	6197	0.305562	chr11	1491197	1491525	1491197	TRUE	TRUE
chr11_14912900_14913771	0.0113602	0.0113907	3.05176e-05	10985	0.0725525	14573	395	79	0.308039	0.511395	0.511395	14526	0.50127	chr11	14912900	14913771	14912900	FALSE	TRUE
chr11_14926471_14927770	0.793457	0.775879	-0.0175781	5193	-0.0556967	7991	403	83	0.424248	0.37238	-0.37238	7968	0.615989	chr11	14926471	14927770	14926471	FALSE	TRUE
chr11_14995128_14995908	0.553711	0.250488	-0.303223	317	-0.368336	896	398	82	1.48295e-07	6.82887	-6.82887	881	2.56789e-06	chr11	14995128	14995908	14995128	FALSE	TRUE
chr11_15094957_15095872	0.2854	0.178223	-0.107178	2408.5	-0.138662	4975	397	82	0.0479908	1.31884	-1.31884	4964	0.128414	chr11	15094957	15095872	15094957	FALSE	TRUE
chr11_1567940_1568907	0.0318909	0.0542603	0.0223694	16753	0.288353	18251	405	83	3.46387e-05	4.46044	4.46044	18258	0.000270751	chr11	1567940	1568907	1567940	TRUE	TRUE
chr11_1577705_1579091	0.876953	0.877441	0.000488281	11778.5	0.036471	12813	406	83	0.600671	0.221363	0.221363	12824	0.757704	chr11	1577705	1579091	1577705	TRUE	TRUE
chr11_1592498_1592810	0.0897217	0.218994	0.129272	18244	0.172389	17257	390	82	0.0140961	1.8509	1.8509	17263	0.0471028	chr11	1592498	1592810	1592498	TRUE	FALSE
chr11_1593550_1594378	0.0376587	0.0392151	0.0015564	13350.5	0.0766891	14729	408	83	0.270631	0.567623	0.567623	14745	0.458706	chr11	1593550	1594378	1593550	TRUE	FALSE
chr11_1595809_1596143	0.0152588	0.0154114	0.000152588	11194.5	-0.0177105	9898	398	82	0.80079	0.0964816	-0.0964816	9894	0.891264	chr11	1595809	1596143	1595809	TRUE	FALSE
chr11_15962882_15963223	0.861328	0.80957	-0.0517578	3689.5	-0.172714	4131	392	81	0.0143654	1.84268	-1.84268	4142	0.0478744	chr11	15962882	15963223	15962882	FALSE	TRUE
chr11_16626053_16629180	0.0697632	0.0496216	-0.0201416	4993	-0.305123	1717	409	83	1.1598e-05	4.93562	-4.93562	1668	0.000104976	chr11	16626053	16629180	16626053	FALSE	FALSE
chr11_16634957_16635969	0.102783	0.0549316	-0.0478516	3804.5	-0.185378	3858	403	82	0.0081148	2.09072	-2.09072	3841	0.0295049	chr11	16634957	16635969	16634957	FALSE	FALSE
chr11_16759945_16760386	0.122498	0.125	0.00250244	14234	0.0339607	12677	376	78	0.635833	0.196657	0.196657	12654	0.784274	chr11	16759945	16760386	16759945	FALSE	FALSE
chr11_16946392_16947398	0.0183105	0.0235901	0.00527954	15268.5	0.0633668	14146	397	83	0.363836	0.439095	0.439095	14156	0.557386	chr11	16946392	16947398	16946392	FALSE	FALSE
chr11_17034843_17036404	0.0664062	0.125854	0.0594482	17668	0.275639	18189	410	83	7.43003e-05	4.12901	4.12901	18194	0.000524723	chr11	17034843	17036404	17034843	FALSE	FALSE
chr11_17229114_17229833	0.015564	0.0137711	-0.00179291	8622	-0.036707	8938.5	401	82	0.600536	0.221461	-0.221461	8938	0.757704	chr11	17229114	17229833	17229114	FALSE	FALSE
chr11_17297779_17298694	0.0111237	0.0148544	0.00373077	14827.5	0.0578016	13894	405	83	0.406715	0.39071	0.39071	13905	0.599263	chr11	17297779	17298694	17297779	FALSE	FALSE
chr11_17373019_17373665	0.0428772	0.0849609	0.0420837	17370	0.217082	17757	393	83	0.00187793	2.72632	2.72632	17765	0.00858798	chr11	17373019	17373665	17373019	FALSE	FALSE
chr11_17374928_17375422	0.0099411	0.00939941	-0.000541687	9981.5	-0.00143652	10783	399	82	0.983937	0.00703288	-0.00703288	10782	0.991504	chr11	17374928	17375422	17374928	FALSE	FALSE
chr11_17410436_17411287	0.0142059	0.0314026	0.0171967	16493	0.391451	18596	404	82	2.24459e-08	7.64886	7.64886	18594	5.26341e-07	chr11	17410436	17411287	17410436	FALSE	FALSE
chr11_17497463_17498626	0.320801	0.22583	-0.0949707	2650.5	-0.288833	1957	409	83	3.31185e-05	4.47993	-4.47993	1905	0.000260608	chr11	17497463	17498626	17497463	FALSE	TRUE
chr11_17565766_17566052	0.21167	0.428711	0.217041	18512	0.236016	17928	389	79	0.000937555	3.028	3.028	17888	0.00473833	chr11	17565766	17566052	17565766	FALSE	FALSE
chr11_1768979_1770712	0.538086	0.376709	-0.161377	1537.5	-0.283637	2031	406	83	4.62833e-05	4.33458	-4.33458	1987	0.000348539	chr11	1768979	1770712	1768979	TRUE	TRUE
chr11_17717505_17717767	0.420166	0.251953	-0.168213	1444	-0.236631	2797	383	81	0.000816097	3.08826	-3.08826	2813	0.0042076	chr11	17717505	17717767	17717505	FALSE	TRUE
chr11_17740789_17743779	0.44165	0.320801	-0.12085	2168	-0.222406	3058	409	83	0.00139278	2.85612	-2.85612	3003	0.00665182	chr11	17740789	17743779	17740789	FALSE	TRUE
chr11_17756056_17758286	0.240601	0.183105	-0.0574951	3546	-0.21722	3173	410	83	0.00179464	2.74602	-2.74602	3107	0.00826355	chr11	17756056	17758286	17756056	FALSE	FALSE
chr11_1784805_1785553	0.0126266	0.0141068	0.0014801	13261	0.104828	15823	401	83	0.132626	0.87737	0.87737	15834	0.27789	chr11	1784805	1785553	1784805	TRUE	FALSE
chr11_18034129_18035268	0.0202484	0.0197449	-0.00050354	10035.5	0.0143925	11624	406	83	0.83655	0.0775081	0.0775081	11634	0.911142	chr11	18034129	18035268	18034129	FALSE	FALSE
chr11_18067716_18067928	0.292969	0.193481	-0.0994873	2568.5	-0.137782	4999	382	79	0.0538078	1.26915	-1.26915	5069	0.140743	chr11	18067716	18067928	18067716	FALSE	FALSE
chr11_18127296_18127711	0.0549622	0.04422	-0.0107422	5868.5	-0.222462	3057	407	83	0.00139521	2.85536	-2.85536	3005	0.00665834	chr11	18127296	18127711	18127296	FALSE	FALSE
chr11_18230619_18230906	0.65332	0.654297	0.000976562	12547.5	0.0196736	11908	395	83	0.778344	0.108828	0.108828	11915	0.878879	chr11	18230619	18230906	18230619	FALSE	TRUE
chr11_18343625_18344238	0.00428772	0.00609589	0.00180817	13611	0.0739157	14628	400	83	0.288354	0.540073	0.540073	14642	0.47938	chr11	18343625	18344238	18343625	FALSE	FALSE
chr11_18415922_18416680	0.00593185	0.00665283	0.000720978	12132.5	0.0314327	12544	404	83	0.652078	0.185701	0.185701	12555	0.794726	chr11	18415922	18416680	18415922	FALSE	FALSE
chr11_18477298_18477756	0.783203	0.744629	-0.0385742	4142	-0.219915	3108	396	81	0.00180944	2.74246	-2.74246	3113	0.00831944	chr11	18477298	18477756	18477298	FALSE	TRUE
chr11_18548060_18548629	0.00424576	0.00498962	0.000743866	12170	0.0756578	14693	397	83	0.277569	0.556628	0.556628	14711	0.467128	chr11	18548060	18548629	18548060	FALSE	FALSE
chr11_18610010_18610463	0.0279083	0.0326538	0.00474548	15127.5	0.0201829	11939	400	82	0.773543	0.111516	0.111516	11937	0.87561	chr11	18610010	18610463	18610010	FALSE	FALSE
chr11_18655811_18656482	0.00504303	0.0051651	0.00012207	11147.5	0.04063	13006	398	82	0.561987	0.250273	0.250273	13012	0.727494	chr11	18655811	18656482	18655811	FALSE	FALSE
chr11_18720271_18720821	0.0117798	0.00819397	-0.00358582	7587.5	-0.0738431	7202	399	82	0.291996	0.534623	-0.534623	7199	0.483588	chr11	18720271	18720821	18720271	FALSE	FALSE
chr11_18742690_18743513	0.101074	0.187622	0.0865479	17960	0.113444	16082	404	83	0.103442	0.985302	0.985302	16101	0.231962	chr11	18742690	18743513	18742690	FALSE	FALSE
chr11_18812572_18814079	0.297363	0.119751	-0.177612	1339	-0.314499	1580	406	83	6.27313e-06	5.20252	-5.20252	1525	6.19902e-05	chr11	18812572	18814079	18812572	FALSE	TRUE
chr11_19138497_19139216	0.00805664	0.00861359	0.000556946	11892.5	0.0250916	12201	401	81	0.721514	0.141755	0.141755	12198	0.842052	chr11	19138497	19139216	19138497	FALSE	FALSE
chr11_19262473_19264397	0.24939	0.286621	0.0372314	17259	0.136212	16654.5	409	83	0.0503103	1.29834	1.29834	16675	0.133383	chr11	19262473	19264397	19262473	FALSE	TRUE
chr11_19366653_19368234	0.180786	0.139404	-0.0413818	4029.5	-0.0755994	7138	404	83	0.277922	0.556078	-0.556078	7110	0.467511	chr11	19366653	19368234	19366653	FALSE	TRUE
chr11_1948915_1949188	0.84668	0.64502	-0.20166	1064.5	-0.363115	952	383	82	2.43323e-07	6.61382	-6.61382	953	3.89982e-06	chr11	1948915	1949188	1948915	TRUE	TRUE
chr11_1968558_1969003	0.0116043	0.0136795	0.0020752	13868	-0.00536474	10566	402	83	0.938968	0.0273494	-0.0273494	10561	0.96968	chr11	1968558	1969003	1968558	TRUE	FALSE
chr11_19733936_19735320	0.0306244	0.0139084	-0.0167236	5268	-0.338533	1254	407	83	1.15497e-06	5.93743	-5.93743	1210	1.45397e-05	chr11	19733936	19735320	19733936	FALSE	TRUE
chr11_1974039_1974333	0.953613	0.922852	-0.0307617	4464.5	-0.303499	1740	398	82	1.49023e-05	4.82675	-4.82675	1712	0.0001309	chr11	1974039	1974333	1974039	TRUE	FALSE
chr11_1978152_1978427	0.939453	0.925781	-0.0136719	5541	-0.0967752	6334	388	82	0.168414	0.773621	-0.773621	6323	0.331103	chr11	1978152	1978427	1978152	TRUE	FALSE
chr11_19798537_19798949	0.0836182	0.379395	0.295898	18611	0.422539	18654	410	83	1.24869e-09	8.90354	8.90354	18657	4.74554e-08	chr11	19798537	19798949	19798537	FALSE	FALSE
chr11_1990899_1991211	0.653809	0.473389	-0.18042	1303	-0.24612	2627	389	81	0.000489831	3.30995	-3.30995	2622	0.00272775	chr11	1990899	1991211	1990899	TRUE	FALSE
chr11_2017459_2018253	0.710938	0.525879	-0.185059	1248.5	-0.314611	1578	393	81	8.17665e-06	5.08742	-5.08742	1585	7.77259e-05	chr11	2017459	2018253	2017459	TRUE	TRUE
chr11_20177608_20178824	0.402588	0.383301	-0.0192871	5068	-0.047368	8423	409	83	0.496262	0.304289	-0.304289	8394	0.676708	chr11	20177608	20178824	20177608	FALSE	TRUE
chr11_20181200_20182325	0.554199	0.355957	-0.198242	1101.5	-0.292625	1900	403	83	2.66845e-05	4.57374	-4.57374	1842	0.000216903	chr11	20181200	20182325	20181200	FALSE	TRUE
chr11_20184570_20185497	0.411133	0.193359	-0.217773	898	-0.330063	1360	385	81	2.9923e-06	5.524	-5.524	1365	3.33316e-05	chr11	20184570	20185497	20184570	FALSE	TRUE
chr11_2033707_2033991	0.702148	0.41333	-0.288818	375.5	-0.453061	268	384	81	1.44872e-10	9.83901	-9.83901	281	7.9599e-09	chr11	2033707	2033991	2033707	TRUE	TRUE
chr11_20385161_20385673	0.014473	0.026825	0.012352	16153	0.227663	17849	389	82	0.00118361	2.92679	2.92679	17845	0.0057886	chr11	20385161	20385673	20385161	FALSE	FALSE
chr11_20408755_20409781	0.0126953	0.0140152	0.00131989	13023.5	0.0956686	15496	406	82	0.171597	0.765489	0.765489	15507	0.335457	chr11	20408755	20409781	20408755	FALSE	FALSE
chr11_20618197_20619920	0.64209	0.373779	-0.268311	490.5	-0.431283	372	403	83	5.99978e-10	9.22186	-9.22186	352	2.63878e-08	chr11	20618197	20619920	20618197	FALSE	TRUE
chr11_20622720_20623399	0.548828	0.203125	-0.345703	184	-0.461562	226	394	83	3.79036e-11	10.4213	-10.4213	210	2.73139e-09	chr11	20622720	20623399	20622720	FALSE	TRUE
chr11_20690579_20691845	0.227051	0.0629272	-0.164062	1497	-0.271992	2230	405	83	9.40121e-05	4.02682	-4.02682	2179	0.00064379	chr11	20690579	20691845	20690579	FALSE	TRUE
chr11_206975_209225	0.0211029	0.0187225	-0.00238037	8224.5	-0.0642472	7622	409	83	0.356016	0.448531	-0.448531	7597	0.549811	chr11	206975	209225	206975	TRUE	FALSE
chr11_2158951_2162484	0.221924	0.204346	-0.0175781	5193	-0.0970925	6326	409	83	0.162998	0.787817	-0.787817	6290	0.32291	chr11	2158951	2162484	2158951	TRUE	FALSE
chr11_2165135_2165672	0.123291	0.123108	-0.000183105	10559	-0.0934033	6454	404	83	0.180044	0.744621	-0.744621	6419	0.346656	chr11	2165135	2165672	2165135	TRUE	FALSE
chr11_2187488_2188245	0.249878	0.216797	-0.0330811	4368.5	-0.134514	5090	393	81	0.0565369	1.24767	-1.24767	5106	0.146363	chr11	2187488	2188245	2187488	TRUE	TRUE
chr11_22214172_22215320	0.148071	0.0997925	-0.0482788	3791	-0.0801428	6942	405	83	0.249946	0.602154	-0.602154	6913	0.435748	chr11	22214172	22215320	22214172	FALSE	TRUE
chr11_22646706_22647441	0.00724411	0.00695038	-0.000293732	10357.5	0.0173152	11778	393	82	0.805274	0.0940563	0.0940563	11773	0.893498	chr11	22646706	22647441	22646706	FALSE	FALSE
chr11_22688285_22688617	0.218994	0.102417	-0.116577	2233.5	-0.160477	4388	388	83	0.0216851	1.66384	-1.66384	4375	0.0675913	chr11	22688285	22688617	22688285	FALSE	FALSE
chr11_22850765_22851367	0.00597382	0.00584793	-0.000125885	10658	0.0257114	12225	369	80	0.711752	0.147671	0.147671	12238	0.83481	chr11	22850765	22851367	22850765	FALSE	FALSE
chr11_2290104_2292932	0.285156	0.326416	0.0412598	17350.5	0.160006	17085	410	83	0.0214611	1.66835	1.66835	17105	0.0670384	chr11	2290104	2292932	2290104	TRUE	TRUE
chr11_235918_237290	0.00797272	0.010849	0.00287628	14444.5	0.155654	17013.5	409	83	0.0253002	1.59688	1.59688	17037	0.0769079	chr11	235918	237290	235918	TRUE	FALSE
chr11_23751953_23752361	0.84082	0.77832	-0.0625	3414	-0.202205	3485	396	82	0.00393642	2.4049	-2.4049	3458	0.0161087	chr11	23751953	23752361	23751953	FALSE	TRUE
chr11_2398223_2399598	0.0157928	0.0195312	0.0037384	14831	0.0804298	14895	407	83	0.248042	0.605475	0.605475	14917	0.43367	chr11	2398223	2399598	2398223	TRUE	TRUE
chr11_2417650_2417993	0.950195	0.94043	-0.00976562	6002.5	-0.116103	5655	399	80	0.101105	0.995228	-0.995228	5694	0.228009	chr11	2417650	2417993	2417650	TRUE	TRUE
chr11_2421040_2422474	0.00871277	0.00896454	0.00025177	11347.5	0.0536692	13693.5	407	83	0.440919	0.355641	0.355641	13712	0.630293	chr11	2421040	2422474	2421040	TRUE	FALSE
chr11_2435295_2436651	0.661133	0.439453	-0.22168	853	-0.45966	238	402	83	4.21412e-11	10.3753	-10.3753	215	2.97302e-09	chr11	2435295	2436651	2435295	TRUE	TRUE
chr11_24518224_24518738	0.0684814	0.026062	-0.0424194	3997	-0.202241	3483	394	82	0.00394288	2.40419	-2.40419	3460	0.0161261	chr11	24518224	24518738	24518224	FALSE	FALSE
chr11_2465171_2465648	0.191162	0.294922	0.10376	18095	0.17458	17285	393	82	0.0128582	1.89082	1.89082	17297	0.0436355	chr11	2465171	2465648	2465171	TRUE	FALSE
chr11_2466247_2466818	0.0665894	0.147095	0.0805054	17903	0.268102	18151	400	83	0.000120268	3.91985	3.91985	18152	0.000797645	chr11	2466247	2466818	2466247	TRUE	TRUE
chr11_26353537_26353812	0.0224915	0.0252686	0.0027771	14387	0.0451738	13260	371	79	0.525473	0.27945	0.27945	13228	0.699848	chr11	26353537	26353812	26353537	FALSE	FALSE
chr11_2720410_2722087	0.28125	0.274902	-0.00634766	6694	-0.0158482	10015	409	83	0.820145	0.0861095	-0.0861095	10011	0.901087	chr11	2720410	2722087	2720410	TRUE	FALSE
chr11_27384359_27384870	0.00246048	0.00233841	-0.00012207	10670.5	0.0064433	11210	388	80	0.925228	0.033751	0.033751	11218	0.962739	chr11	27384359	27384870	27384359	FALSE	FALSE
chr11_27493640_27494357	0.0278168	0.0264587	-0.00135803	9015	-0.0241845	9556	410	83	0.728403	0.137628	-0.137628	9540	0.846922	chr11	27493640	27494357	27493640	FALSE	FALSE
chr11_27527863_27528517	0.00769043	0.00803375	0.000343323	11498.5	0.018094	11822	399	82	0.79635	0.098896	0.098896	11817	0.888967	chr11	27527863	27528517	27527863	FALSE	FALSE
chr11_27721661_27722639	0.0631104	0.0441284	-0.0189819	5099	-0.333353	1323	410	83	1.6533e-06	5.78165	-5.78165	1262	1.98948e-05	chr11	27721661	27722639	27721661	FALSE	FALSE
chr11_27740644_27741236	0.0567017	0.0237122	-0.0329895	4373	-0.180525	3957	400	81	0.0103663	1.98438	-1.98438	3957	0.0364464	chr11	27740644	27741236	27740644	FALSE	FALSE
chr11_27743472_27744564	0.363525	0.16626	-0.197266	1110	-0.233996	2849	389	82	0.00086418	3.0634	-3.0634	2825	0.00443111	chr11	27743472	27744564	27743472	FALSE	TRUE
chr11_279072_281700	0.318848	0.377197	0.0583496	17652	0.125801	16401	410	83	0.0705987	1.1512	1.1512	16422	0.173679	chr11	279072	281700	279072	TRUE	TRUE
chr11_2812415_2813396	0.485352	0.431885	-0.0534668	3648.5	-0.100491	6227	405	83	0.14911	0.826495	-0.826495	6179	0.302908	chr11	2812415	2813396	2812415	TRUE	TRUE
chr11_2828445_2828884	0.210938	0.104614	-0.106323	2438	-0.347717	1141	390	82	7.35369e-07	6.13349	-6.13349	1138	9.86965e-06	chr11	2828445	2828884	2828445	TRUE	FALSE
chr11_2871364_2871940	0.777344	0.572754	-0.20459	1041	-0.357901	1013	398	81	3.77658e-07	6.4229	-6.4229	1017	5.66518e-06	chr11	2871364	2871940	2871364	TRUE	TRUE
chr11_2883689_2884461	0.449951	0.513672	0.0637207	17727.5	0.0529188	13649	405	81	0.452147	0.344721	0.344721	13637	0.639932	chr11	2883689	2884461	2883689	TRUE	TRUE
chr11_288847_289239	0.035553	0.0298157	-0.0057373	6844.5	-0.0836294	6803	394	80	0.23798	0.623459	-0.623459	6827	0.421907	chr11	288847	289239	288847	TRUE	FALSE
chr11_2890388_2891337	0.660645	0.665039	0.00439453	15036	0.00756833	11273	398	82	0.914359	0.0388831	0.0388831	11272	0.95701	chr11	2890388	2891337	2890388	TRUE	TRUE
chr11_2905023_2907024	0.0938721	0.104736	0.0108643	16031	0.0456656	13286	410	83	0.511791	0.290907	0.290907	13295	0.687969	chr11	2905023	2907024	2905023	TRUE	TRUE
chr11_2907308_2907675	0.234375	0.394775	0.1604	18378	0.12849	16478	365	79	0.0732777	1.13503	1.13503	16394	0.178651	chr11	2907308	2907675	2907308	TRUE	FALSE
chr11_2923301_2923817	0.010994	0.0121536	0.00115967	12806	0.0306024	12497	400	83	0.660886	0.179874	0.179874	12501	0.800411	chr11	2923301	2923817	2923301	TRUE	FALSE
chr11_2930289_2931093	0.802734	0.831055	0.0283203	16990	0.0283112	12377	395	82	0.686785	0.163179	0.163179	12377	0.818394	chr11	2930289	2931093	2930289	TRUE	TRUE
chr11_2942794_2943066	0.743164	0.766602	0.0234375	16790	0.0705749	14478	387	80	0.320296	0.494449	0.494449	14423	0.51278	chr11	2942794	2943066	2942794	TRUE	FALSE
chr11_2949788_2951756	0.0282898	0.0266876	-0.00160217	8780	-0.0233191	9597	403	83	0.738079	0.131897	-0.131897	9580	0.853553	chr11	2949788	2951756	2949788	TRUE	FALSE
chr11_30038522_30038823	0.522461	0.188843	-0.333496	217	-0.286719	1987	384	80	5.43619e-05	4.26471	-4.26471	2018	0.000402738	chr11	30038522	30038823	30038522	FALSE	TRUE
chr11_3012799_3014181	0.005867	0.0054512	-0.000415802	10183.5	-0.0330287	9119	406	83	0.635369	0.196974	-0.196974	9104	0.783897	chr11	3012799	3014181	3012799	TRUE	FALSE
chr11_30344536_30344946	0.0075264	0.00450897	-0.00301743	7846	-0.113924	5733	395	80	0.107147	0.970019	-0.970019	5764	0.237941	chr11	30344536	30344946	30344536	FALSE	FALSE
chr11_304079_304379	0.920898	0.900391	-0.0205078	4969.5	-0.149427	4660	386	81	0.0344108	1.4633	-1.4633	4671	0.0989122	chr11	304079	304379	304079	TRUE	TRUE
chr11_30606004_30608128	0.178955	0.101868	-0.0770874	3029	-0.272054	2229	410	83	9.20901e-05	4.03579	-4.03579	2170	0.00063271	chr11	30606004	30608128	30606004	FALSE	TRUE
chr11_3078142_3078984	0.0128784	0.0139008	0.00102234	12622	-0.0295862	9305	399	82	0.672761	0.172139	-0.172139	9305	0.8079	chr11	3078142	3078984	3078142	TRUE	FALSE
chr11_310728_311419	0.0667114	0.0467529	-0.0199585	5021	-0.186153	3843	406	83	0.00750677	2.12455	-2.12455	3801	0.0276646	chr11	310728	311419	310728	TRUE	TRUE
chr11_31391087_31391498	0.00304222	0.00284576	-0.000196457	10534	0.00886338	11334	401	83	0.898949	0.0462652	0.0462652	11334	0.947832	chr11	31391087	31391498	31391087	FALSE	FALSE
chr11_315739_316539	0.833496	0.842773	0.00927734	15866	0.0829343	15011	395	83	0.234843	0.629222	0.629222	15018	0.417896	chr11	315739	316539	315739	TRUE	TRUE
chr11_31820060_31821416	0.830566	0.804688	-0.0258789	4670	0.0304462	12489	384	81	0.666913	0.175931	0.175931	12468	0.803544	chr11	31820060	31821416	31820060	FALSE	TRUE
chr11_31825743_31826967	0.847656	0.813477	-0.0341797	4309	-0.0522683	8159	405	83	0.453143	0.343764	-0.343764	8140	0.641004	chr11	31825743	31826967	31825743	FALSE	TRUE
chr11_31831620_31839038	0.336182	0.302979	-0.0332031	4357.5	-0.0771672	7062	410	83	0.267469	0.572726	-0.572726	7036	0.45556	chr11	31831620	31839038	31831620	FALSE	TRUE
chr11_318361_319052	0.0645752	0.0468445	-0.0177307	5173	-0.195139	3644	407	83	0.00506148	2.29572	-2.29572	3591	0.0198809	chr11	318361	319052	318361	TRUE	TRUE
chr11_31839363_31839813	0.699219	0.78125	0.0820312	17921.5	0.107046	15887	387	82	0.127742	0.893667	0.893667	15871	0.270071	chr11	31839363	31839813	31839363	FALSE	TRUE
chr11_31841315_31842003	0.823242	0.813477	-0.00976562	6002.5	0.0136168	11579	386	82	0.846719	0.0722605	0.0722605	11579	0.916949	chr11	31841315	31842003	31841315	FALSE	TRUE
chr11_31847132_31847958	0.674316	0.662598	-0.0117188	5752	-0.0198231	9770	406	83	0.776175	0.11004	-0.11004	9761	0.877479	chr11	31847132	31847958	31847132	FALSE	TRUE
chr11_31848487_31848776	0.823242	0.726074	-0.097168	2612	-0.195452	3637	393	80	0.00583944	2.23363	-2.23363	3663	0.0224703	chr11	31848487	31848776	31848487	FALSE	TRUE
chr11_3186131_3186768	0.0234528	0.0186615	-0.00479126	7143	-0.10098	6213	403	82	0.149323	0.825872	-0.825872	6182	0.303145	chr11	3186131	3186768	3186131	TRUE	TRUE
chr11_32112394_32113277	0.0335388	0.0297394	-0.00379944	7511	-0.0729683	7250	408	83	0.29456	0.530825	-0.530825	7222	0.486074	chr11	32112394	32113277	32112394	FALSE	FALSE
chr11_3224524_3225077	0.262939	0.108154	-0.154785	1631.5	-0.364347	941	379	80	3.00069e-07	6.52278	-6.52278	984	4.6502e-06	chr11	3224524	3225077	3224524	TRUE	TRUE
chr11_32354760_32355484	0.582031	0.634766	0.0527344	17558	-0.0177909	9892	401	82	0.799839	0.0969974	-0.0969974	9890	0.890791	chr11	32354760	32355484	32354760	FALSE	TRUE
chr11_32448261_32449744	0.605957	0.416504	-0.189453	1191	-0.149772	4650	399	83	0.031744	1.49834	-1.49834	4622	0.0924093	chr11	32448261	32449744	32448261	FALSE	TRUE
chr11_32452144_32452708	0.738281	0.59668	-0.141602	1828.5	-0.165221	4292	397	81	0.0190618	1.71984	-1.71984	4293	0.0607317	chr11	32452144	32452708	32452144	FALSE	TRUE
chr11_32454874_32457311	0.269775	0.176514	-0.0932617	2695.5	-0.157247	4466	408	83	0.0238732	1.62209	-1.62209	4428	0.0732659	chr11	32454874	32457311	32454874	FALSE	TRUE
chr11_32460586_32461004	0.675293	0.390381	-0.284912	400	-0.186385	3834	381	80	0.00874838	2.05807	-2.05807	3880	0.0314848	chr11	32460586	32461004	32460586	FALSE	TRUE
chr11_3253768_3254066	0.621094	0.445557	-0.175537	1355	-0.338227	1257	386	81	1.6855e-06	5.77327	-5.77327	1266	2.02174e-05	chr11	3253768	3254066	3253768	TRUE	TRUE
chr11_32605183_32605729	0.00325203	0.00322723	-2.47955e-05	10831	0.0293269	12426	390	80	0.676673	0.169621	0.169621	12421	0.810779	chr11	32605183	32605729	32605183	FALSE	FALSE
chr11_32851160_32851951	0.018219	0.0595703	0.0413513	17352.5	0.299718	18297	397	83	1.73048e-05	4.76183	4.76183	18303	0.000149088	chr11	32851160	32851951	32851160	FALSE	FALSE
chr11_32913989_32915514	0.0225372	0.0219574	-0.000579834	9922	-0.0118663	10234	408	82	0.865615	0.0626754	-0.0626754	10233	0.927653	chr11	32913989	32915514	32913989	FALSE	FALSE
chr11_33037206_33037917	0.0295715	0.0301666	0.000595093	11942.5	-0.0861189	6716	399	83	0.216935	0.663671	-0.663671	6692	0.395263	chr11	33037206	33037917	33037206	FALSE	FALSE
chr11_33060699_33061846	0.00538635	0.00749969	0.00211334	13902	0.152094	16952	404	83	0.0289914	1.53773	1.53773	16971	0.0860421	chr11	33060699	33061846	33060699	FALSE	FALSE
chr11_33182987_33183264	0.00584412	0.00714111	0.001297	12996	0.00884306	11330	382	82	0.899536	0.0459816	0.0459816	11332	0.948115	chr11	33182987	33183264	33182987	FALSE	FALSE
chr11_33278657_33280175	0.0421448	0.043335	0.00119019	12848	-0.0519634	8181	409	83	0.455407	0.3416	-0.3416	8157	0.642849	chr11	33278657	33280175	33278657	FALSE	FALSE
chr11_33397607_33398494	0.0379333	0.018631	-0.0193024	5066	-0.266488	2316	405	83	0.00012996	3.88619	-3.88619	2268	0.000851973	chr11	33397607	33398494	33397607	FALSE	TRUE
chr11_33757476_33758122	0.0392456	0.0369263	-0.00231934	8260	-0.0668749	7509.5	405	83	0.337086	0.47226	-0.47226	7484	0.530458	chr11	33757476	33758122	33757476	FALSE	FALSE
chr11_33795392_33796319	0.0157166	0.0170898	0.00137329	13101	0.0514434	13569	404	83	0.460388	0.336876	0.336876	13590	0.647104	chr11	33795392	33796319	33795392	FALSE	FALSE
chr11_33850451_33850970	0.330811	0.333984	0.00317383	14607	0.00432254	11088	397	81	0.951437	0.0216201	0.0216201	11088	0.975491	chr11	33850451	33850970	33850451	FALSE	TRUE
chr11_33890357_33891495	0.104675	0.122681	0.0180054	16537	0.126138	16409	409	83	0.0699064	1.15548	1.15548	16433	0.172451	chr11	33890357	33891495	33890357	FALSE	TRUE
chr11_3400155_3400419	0.00959778	0.0106812	0.00108337	12708	0.113332	16079	399	82	0.105862	0.975261	0.975261	16076	0.235757	chr11	3400155	3400419	3400155	TRUE	FALSE
chr11_34072986_34074703	0.0122833	0.0132828	0.000999451	12595.5	0.0651309	14222	409	83	0.349417	0.456655	0.456655	14242	0.543519	chr11	34072986	34074703	34072986	FALSE	FALSE
chr11_34126828_34127573	0.0032959	0.00333595	4.00543e-05	11007	0.00876427	11325	391	82	0.89791	0.046767	0.046767	11342	0.94745	chr11	34126828	34127573	34126828	FALSE	FALSE
chr11_34378229_34379993	0.0291748	0.0213318	-0.00784302	6357.5	-0.210491	3301	410	83	0.00248198	2.6052	-2.6052	3236	0.010923	chr11	34378229	34379993	34378229	FALSE	FALSE
chr11_34380488_34380710	0	0	0	10903.5	-0.0224408	9642	366	75	0.740486	0.130483	-0.130483	9593	0.854979	chr11	34380488	34380710	34380488	FALSE	FALSE
chr11_3443245_3444896	0.0132141	0.0204315	0.00721741	15600	0.213069	17721	406	83	0.00220381	2.65683	2.65683	17739	0.00986631	chr11	3443245	3444896	3443245	TRUE	FALSE
chr11_34460165_34460857	0.0094223	0.00978851	0.000366211	11542	0.0189369	11864	407	82	0.786853	0.104107	0.104107	11867	0.883735	chr11	34460165	34460857	34460165	FALSE	FALSE
chr11_34937328_34938380	0.0194702	0.0221405	0.00267029	14327.5	0.0137779	11588	404	83	0.843509	0.0739104	0.0739104	11593	0.914924	chr11	34937328	34938380	34937328	FALSE	FALSE
chr11_35160375_35161000	0.0156403	0.00940704	-0.00623322	6731	-0.21325	3241	393	83	0.00225493	2.64687	-2.64687	3197	0.0100615	chr11	35160375	35161000	35160375	FALSE	TRUE
chr11_35440375_35441882	0.202759	0.155396	-0.0473633	3824.5	-0.0751466	7158	409	83	0.280305	0.55237	-0.55237	7128	0.469937	chr11	35440375	35441882	35440375	FALSE	TRUE
chr11_355947_356447	0.0419617	0.0318604	-0.0101013	5958	-0.108826	5922	399	83	0.118597	0.925927	-0.925927	5896	0.256171	chr11	355947	356447	355947	TRUE	FALSE
chr11_35639629_35641485	0.0235291	0.0207062	-0.00282288	7964.5	-0.00570085	10543	410	83	0.935019	0.0291794	-0.0291794	10541	0.967554	chr11	35639629	35641485	35639629	FALSE	FALSE
chr11_35684421_35684846	0.0148926	0.0142365	-0.000656128	9811	0.00525547	11145.5	397	81	0.940885	0.0264636	0.0264636	11144	0.970407	chr11	35684421	35684846	35684421	FALSE	FALSE
chr11_35965642_35966454	0.0440674	0.0167542	-0.0273132	4611	-0.325687	1421	395	82	3.42876e-06	5.46486	-5.46486	1390	3.74367e-05	chr11	35965642	35966454	35965642	FALSE	TRUE
chr11_3601851_3602616	0.0634766	0.0635376	6.10352e-05	11055	0.00761093	11274	410	83	0.91321	0.0394292	0.0394292	11276	0.956288	chr11	3601851	3602616	3601851	TRUE	TRUE
chr11_36397926_36399398	0.0648193	0.0596924	-0.00512695	7022	-0.0662209	7535	409	83	0.341427	0.466702	-0.466702	7508	0.535133	chr11	36397926	36399398	36397926	FALSE	TRUE
chr11_3663052_3663802	0.108215	0.148926	0.0407104	17337	0.173001	17266	401	83	0.0130703	1.88371	1.88371	17287	0.0442111	chr11	3663052	3663802	3663052	TRUE	FALSE
chr11_3688375_3689007	0.980957	0.977051	-0.00390625	7452	-0.0803154	6930	374	79	0.261028	0.583312	-0.583312	6994	0.447777	chr11	3688375	3689007	3688375	TRUE	TRUE
chr11_375851_377380	0.878906	0.83252	-0.0463867	3862	-0.218635	3136	409	83	0.00167814	2.77517	-2.77517	3076	0.00780577	chr11	375851	377380	375851	TRUE	TRUE
chr11_379295_380768	0.922852	0.87793	-0.0449219	3905	-0.234955	2832	407	83	0.000737803	3.13206	-3.13206	2779	0.00385484	chr11	379295	380768	379295	TRUE	FALSE
chr11_3818447_3819307	0.00614929	0.00629807	0.000148773	11185.5	-0.0275854	9395	401	81	0.695423	0.157751	-0.157751	9397	0.824481	chr11	3818447	3819307	3818447	TRUE	FALSE
chr11_3829696_3830004	0.0139618	0.0256348	0.011673	16090	0.246926	18009	390	83	0.000401022	3.39683	3.39683	18016	0.0022791	chr11	3829696	3830004	3829696	TRUE	FALSE
chr11_3861855_3862996	0.0138855	0.00924683	-0.00463867	7184	-0.0736775	7214	385	82	0.290231	0.537256	-0.537256	7186	0.481602	chr11	3861855	3862996	3861855	TRUE	FALSE
chr11_3876287_3877431	0.0162964	0.0168304	0.000534058	11858.5	0.0402392	12995	409	83	0.563309	0.249254	0.249254	13006	0.728727	chr11	3876287	3877431	3876287	TRUE	FALSE
chr11_394257_394619	0.019043	0.17749	0.158447	18371	0.29156	18261	391	81	3.52613e-05	4.4527	4.4527	18256	0.000275044	chr11	394257	394619	394257	TRUE	FALSE
chr11_396685_397462	0.915039	0.646484	-0.268555	488.5	-0.268538	2280	397	82	0.000128122	3.89238	-3.89238	2263	0.000841393	chr11	396685	397462	396685	TRUE	FALSE
chr11_400096_400757	0.888672	0.777344	-0.111328	2326	-0.31551	1564	395	83	6.1635e-06	5.21017	-5.21017	1518	6.11649e-05	chr11	400096	400757	400096	TRUE	FALSE
chr11_406491_407871	0.233643	0.203369	-0.0302734	4486	0	10851.5	403	83	0.999658	0.000148732	0.000148732	10851	0.999764	chr11	406491	407871	406491	TRUE	TRUE
chr11_4115689_4116489	0.00371361	0.00418091	0.0004673	11727	0.0406213	13005	401	83	0.559102	0.252509	0.252509	13026	0.725088	chr11	4115689	4116489	4115689	TRUE	FALSE
chr11_416419_417650	0.0307922	0.106689	0.0759277	17874	0.352597	18498	402	82	4.78744e-07	6.3199	6.3199	18497	6.8945e-06	chr11	416419	417650	416419	TRUE	TRUE
chr11_420265_420975	0.945312	0.89502	-0.050293	3727	-0.40739	560	399	82	6.12636e-09	8.2128	-8.2128	549	1.73389e-07	chr11	420265	420975	420265	TRUE	TRUE
chr11_4208448_4209153	0.0206146	0.0191345	-0.0014801	8887.5	0.0144263	11626	399	82	0.837226	0.0771574	0.0771574	11628	0.911409	chr11	4208448	4209153	4208448	TRUE	FALSE
chr11_43333439_43333887	0.00759888	0.00878906	0.00119019	12848	0.0936852	15416	386	80	0.185763	0.731041	0.731041	15384	0.354245	chr11	43333439	43333887	43333439	FALSE	FALSE
chr11_43380241_43381040	0.0270996	0.0302124	0.00311279	14578	0.0185512	11840	401	82	0.790757	0.101957	0.101957	11845	0.885646	chr11	43380241	43381040	43380241	FALSE	FALSE
chr11_43568921_43569854	0.330566	0.283203	-0.0473633	3824.5	-0.0587082	7858	398	82	0.402502	0.395232	-0.395232	7856	0.595913	chr11	43568921	43569854	43568921	FALSE	FALSE
chr11_43600712_43601409	0.0241394	0.0250702	0.000930786	12469.5	-0.0708176	7335	393	83	0.310503	0.507934	-0.507934	7317	0.503735	chr11	43600712	43601409	43600712	FALSE	FALSE
chr11_43602545_43603215	0.500977	0.187988	-0.312988	286.5	-0.250911	2545	395	82	0.000347561	3.45897	-3.45897	2531	0.00201109	chr11	43602545	43603215	43602545	FALSE	TRUE
chr11_43702016_43702597	0.020874	0.0200195	-0.000854492	9579.5	-0.0253237	9502	405	82	0.717775	0.144012	-0.144012	9500	0.839203	chr11	43702016	43702597	43702016	FALSE	FALSE
chr11_43963626_43966048	0.0644531	0.0400085	-0.0244446	4748	-0.149458	4659	403	82	0.032823	1.48382	-1.48382	4637	0.0950497	chr11	43963626	43966048	43963626	FALSE	TRUE
chr11_44087518_44088165	0.0379639	0.0258789	-0.012085	5712.5	-0.140387	4920	368	80	0.0484174	1.315	-1.315	4975	0.129273	chr11	44087518	44088165	44087518	FALSE	FALSE
chr11_44117117_44117994	0.0114822	0.0104218	-0.00106049	9320.5	-0.0780062	7024	401	82	0.265596	0.575779	-0.575779	7025	0.453123	chr11	44117117	44117994	44117117	FALSE	FALSE
chr11_44325657_44326517	0.695312	0.625	-0.0703125	3213.5	-0.0772695	7057	404	83	0.267441	0.572772	-0.572772	7035	0.45556	chr11	44325657	44326517	44325657	FALSE	TRUE
chr11_44327240_44327932	0.464844	0.435303	-0.029541	4512	-0.0515046	8213	384	81	0.466381	0.33126	-0.33126	8219	0.651944	chr11	44327240	44327932	44327240	FALSE	TRUE
chr11_44330542_44331761	0.43457	0.347656	-0.0869141	2815.5	-0.167526	4250	407	82	0.016654	1.77848	-1.77848	4241	0.0540311	chr11	44330542	44331761	44330542	FALSE	TRUE
chr11_44337697_44338783	0.2146	0.159668	-0.0549316	3620.5	-0.137652	5005	407	82	0.0491565	1.30842	-1.30842	4987	0.130916	chr11	44337697	44338783	44337697	FALSE	FALSE
chr11_44541537_44541956	0.8125	0.582031	-0.230469	788	-0.437977	342	393	80	6.49911e-10	9.18715	-9.18715	359	2.81218e-08	chr11	44541537	44541956	44541537	FALSE	TRUE
chr11_44586602_44587404	0.0766602	0.0689697	-0.00769043	6414	-0.126859	5299	410	83	0.068264	1.16581	-1.16581	5266	0.169448	chr11	44586602	44587404	44586602	FALSE	FALSE
chr11_44748205_44749761	0.0569458	0.0648193	0.00787354	15699	0.00609756	11191	390	82	0.93115	0.0309804	0.0309804	11191	0.965842	chr11	44748205	44749761	44748205	FALSE	TRUE
chr11_44971048_44972685	0.0506897	0.101807	0.0511169	17539	0.343168	18464	410	83	8.10392e-07	6.0913	6.0913	18471	1.0738e-05	chr11	44971048	44972685	44971048	FALSE	FALSE
chr11_449961_451178	0.00989532	0.0109711	0.00107574	12699.5	0.0949585	15473	403	82	0.175065	0.756801	0.756801	15475	0.340133	chr11	449961	451178	449961	TRUE	FALSE
chr11_45168618_45169101	0.012352	0.0149689	0.00261688	14299	0.0495082	13468	403	83	0.477556	0.320976	0.320976	13486	0.661356	chr11	45168618	45169101	45168618	FALSE	FALSE
chr11_45201783_45202728	0.046936	0.0445862	-0.00234985	8241.5	-0.0145878	10091	408	83	0.834293	0.0786811	-0.0786811	10086	0.909962	chr11	45201783	45202728	45201783	FALSE	FALSE
chr11_45307441_45307975	0.0952148	0.203735	0.108521	18129	0.171276	17246	387	81	0.0153039	1.8152	1.8152	17240	0.0504545	chr11	45307441	45307975	45307441	FALSE	TRUE
chr11_45376931_45377243	0.291992	0.141602	-0.150391	1696.5	-0.187201	3812	388	82	0.00770743	2.11309	-2.11309	3816	0.0282651	chr11	45376931	45377243	45376931	FALSE	TRUE
chr11_45671197_45672412	0.870117	0.861816	-0.00830078	6283	-0.0614725	7747	386	81	0.384393	0.415224	-0.415224	7758	0.578427	chr11	45671197	45672412	45671197	FALSE	TRUE
chr11_45686160_45687495	0.0797119	0.0483093	-0.0314026	4433	-0.288096	1973	409	83	3.46861e-05	4.45984	-4.45984	1919	0.000271009	chr11	45686160	45687495	45686160	FALSE	TRUE
chr11_45825615_45826872	0.0314941	0.0374146	0.00592041	15401.5	0.0593797	13956	405	82	0.396429	0.401835	0.401835	13962	0.589683	chr11	45825615	45826872	45825615	FALSE	FALSE
chr11_45868742_45869413	0.0233154	0.0225067	-0.000808716	9627	0.0416802	13058	407	83	0.549583	0.259967	0.259967	13082	0.718211	chr11	45868742	45869413	45868742	FALSE	FALSE
chr11_45907006_45907809	0.109558	0.105164	-0.00439453	7271.5	0.0195561	11902.5	406	83	0.779117	0.108397	0.108397	11908	0.879275	chr11	45907006	45907809	45907006	FALSE	FALSE
chr11_459088_459345	0.987305	0.994629	0.00732422	15614.5	-0.0244118	9539	170	40	0.801253	0.0962301	-0.0962301	9898	0.891498	chr11	459088	459345	459088	TRUE	FALSE
chr11_45921387_45922167	0.22998	0.193115	-0.0368652	4206.5	-0.240219	2738	402	81	0.000644202	3.19098	-3.19098	2723	0.0034377	chr11	45921387	45922167	45921387	FALSE	FALSE
chr11_45939296_45940141	0.00821686	0.00794983	-0.000267029	10411	0.0599758	13987	409	83	0.388892	0.410171	0.410171	14011	0.58246	chr11	45939296	45940141	45939296	FALSE	FALSE
chr11_45943513_45944852	0.107361	0.193848	0.0864868	17959	0.310432	18347	410	83	8.11041e-06	5.09096	5.09096	18353	7.7371e-05	chr11	45943513	45944852	45943513	FALSE	FALSE
chr11_46259264_46260048	0.0273438	0.0324097	0.00506592	15229	0.0137805	11589	400	82	0.844406	0.0734487	0.0734487	11586	0.915302	chr11	46259264	46260048	46259264	FALSE	FALSE
chr11_46260617_46260945	0.0155029	0.0103607	-0.00514221	7016	-0.108842	5921	306	72	0.139829	0.854404	-0.854404	6104	0.288909	chr11	46260617	46260945	46260617	FALSE	FALSE
chr11_46264973_46265335	0.00395966	0.00444794	0.000488281	11778.5	-0.0206665	9739	393	82	0.768132	0.114564	-0.114564	9730	0.871856	chr11	46264973	46265335	46264973	FALSE	FALSE
chr11_4629098_4629530	0.0133209	0.0103149	-0.00300598	7850	-0.137029	5022	399	83	0.0492799	1.30733	-1.30733	4989	0.13117	chr11	4629098	4629530	4629098	TRUE	FALSE
chr11_46316875_46317485	0.142944	0.0359802	-0.106934	2416	-0.385523	723	403	82	3.67371e-08	7.4349	-7.4349	716	7.89341e-07	chr11	46316875	46317485	46316875	FALSE	FALSE
chr11_46354091_46355190	0.178467	0.20874	0.0302734	17056	-0.00640155	10497	399	83	0.927191	0.0328306	-0.0328306	10496	0.963846	chr11	46354091	46355190	46354091	FALSE	FALSE
chr11_46368650_46369660	0.0576477	0.0668945	0.00924683	15857.5	0.0706788	14482.5	404	83	0.310403	0.508074	0.508074	14507	0.503676	chr11	46368650	46369660	46368650	FALSE	FALSE
chr11_46387905_46388535	0.947266	0.939453	-0.0078125	6378	-0.120924	5488	390	81	0.0866703	1.06213	-1.06213	5501	0.203236	chr11	46387905	46388535	46387905	FALSE	TRUE
chr11_46402624_46404139	0.0588379	0.0964966	0.0376587	17272	0.179132	17347	409	83	0.0100476	1.99794	1.99794	17372	0.0355124	chr11	46402624	46404139	46402624	FALSE	FALSE
chr11_46406904_46407441	0.873535	0.864258	-0.00927734	6088	-0.096564	6339	405	83	0.165652	0.780804	-0.780804	6301	0.32732	chr11	46406904	46407441	46406904	FALSE	TRUE
chr11_46410921_46414687	0.110962	0.0956421	-0.0153198	5383.5	-0.148751	4677	410	83	0.0325186	1.48787	-1.48787	4632	0.0942995	chr11	46410921	46414687	46410921	FALSE	FALSE
chr11_46615197_46615664	0.00653839	0.00602722	-0.000511169	10022.5	0.0587528	13936	390	81	0.405247	0.39228	0.39228	13918	0.598228	chr11	46615197	46615664	46615197	FALSE	FALSE
chr11_46638637_46639486	0.00893402	0.00904083	0.000106812	11129	0.0179144	11808	403	82	0.798263	0.0978542	0.0978542	11808	0.889902	chr11	46638637	46639486	46638637	FALSE	FALSE
chr11_46721979_46722428	0.00843811	0.0102463	0.00180817	13611	0.016348	11716	401	81	0.816661	0.0879583	0.0879583	11708	0.899093	chr11	46721979	46722428	46721979	FALSE	FALSE
chr11_46726745_46727037	0.972168	0.969727	-0.00244141	8178.5	-0.11351	5753	396	80	0.109106	0.962152	-0.962152	5789	0.240977	chr11	46726745	46727037	46726745	FALSE	FALSE
chr11_46867194_46868077	0.00667953	0.0067482	6.86646e-05	11068	0.0327152	12617	397	83	0.638924	0.19455	0.19455	12628	0.785684	chr11	46867194	46868077	46867194	FALSE	FALSE
chr11_46939358_46940118	0.0349426	0.0271912	-0.00775146	6401	-0.182927	3911.5	403	82	0.00899529	2.04598	-2.04598	3889	0.0322578	chr11	46939358	46940118	46939358	FALSE	FALSE
chr11_47198027_47198885	0.0101624	0.0104141	0.00025177	11347.5	0.0242261	12157	398	81	0.73105	0.136053	0.136053	12149	0.848266	chr11	47198027	47198885	47198027	FALSE	FALSE
chr11_47207188_47209176	0.0831299	0.0823975	-0.000732422	9710.5	0.0160153	11698	410	83	0.81824	0.0871192	0.0871192	11701	0.900036	chr11	47207188	47209176	47207188	FALSE	FALSE
chr11_47236404_47236933	0.00541687	0.00617218	0.00075531	12186.5	0.0582853	13918	398	81	0.406628	0.390803	0.390803	13907	0.599263	chr11	47236404	47236933	47236404	FALSE	FALSE
chr11_47291200_47291858	0.0106812	0.00828552	-0.00239563	8218	-0.0965208	6340	396	81	0.170153	0.769161	-0.769161	6342	0.333506	chr11	47291200	47291858	47291200	FALSE	FALSE
chr11_47376651_47377236	0.109985	0.0759277	-0.0340576	4313	-0.176111	4055	344	67	0.0224816	1.64817	-1.64817	4396	0.0696654	chr11	47376651	47377236	47376651	FALSE	FALSE
chr11_47416357_47416598	0.895508	0.854492	-0.0410156	4044.5	-0.153929	4539	385	80	0.0302261	1.51962	-1.51962	4586	0.0887824	chr11	47416357	47416598	47416357	FALSE	FALSE
chr11_47429733_47430346	0.00647736	0.00652313	4.57764e-05	11021.5	0.0429455	13137	397	81	0.542362	0.265711	0.265711	13117	0.71225	chr11	47429733	47430346	47429733	FALSE	FALSE
chr11_47447704_47448257	0.0197296	0.0239868	0.0042572	14989.5	0.138818	16710	402	82	0.0474514	1.32375	1.32375	16711	0.127292	chr11	47447704	47448257	47447704	FALSE	FALSE
chr11_47573911_47574899	0.0123444	0.0118561	-0.000488281	10074.5	-0.00551962	10556	406	83	0.937146	0.0281926	-0.0281926	10551	0.968777	chr11	47573911	47574899	47573911	FALSE	FALSE
chr11_47586848_47587608	0.020752	0.0252838	0.00453186	15082.5	0.108135	15919	403	83	0.120712	0.918251	0.918251	15938	0.259215	chr11	47586848	47587608	47586848	FALSE	FALSE
chr11_47600129_47600927	0.00475311	0.00692749	0.00217438	13963.5	0.107469	15899	400	81	0.12621	0.898907	0.898907	15895	0.26792	chr11	47600129	47600927	47600129	FALSE	FALSE
chr11_47611138_47612438	0.883789	0.879883	-0.00390625	7452	-0.0597903	7806	401	83	0.391186	0.407616	-0.407616	7796	0.584424	chr11	47611138	47612438	47611138	FALSE	TRUE
chr11_47615710_47616055	0.177124	0.0932007	-0.0839233	2878	-0.123008	5428	269	56	0.146806	0.833257	-0.833257	6164	0.299211	chr11	47615710	47616055	47615710	FALSE	FALSE
chr11_47663577_47664331	0.00809479	0.00811005	1.52588e-05	10955.5	-0.0053845	10564	405	83	0.938696	0.0274752	-0.0274752	10559	0.969537	chr11	47663577	47664331	47663577	FALSE	FALSE
chr11_47736739_47737106	0.0381775	0.0309296	-0.00724792	6512.5	-0.0903579	6568	395	81	0.200018	0.69893	-0.69893	6579	0.372794	chr11	47736739	47737106	47736739	FALSE	FALSE
chr11_47788200_47789022	0.00472641	0.00505447	0.000328064	11470	0.0304187	12485	404	83	0.66251	0.178807	0.178807	12490	0.801084	chr11	47788200	47789022	47788200	FALSE	FALSE
chr11_47869793_47870356	0.00699615	0.00545502	-0.00154114	8837.5	-0.0414509	8718	391	82	0.551651	0.258335	-0.258335	8694	0.719358	chr11	47869793	47870356	47869793	FALSE	FALSE
chr11_48001604_48003170	0.0823975	0.0771484	-0.00524902	6986.5	-0.0118425	10235	410	83	0.865151	0.0629083	-0.0629083	10230	0.927315	chr11	48001604	48003170	48001604	FALSE	FALSE
chr11_48921725_48922742	0.720215	0.507812	-0.212402	958.5	-0.431172	373	409	83	5.76613e-10	9.23912	-9.23912	351	2.54198e-08	chr11	48921725	48922742	48921725	FALSE	TRUE
chr11_489247_490115	0.939453	0.938477	-0.000976562	9429.5	-0.0387249	8842	399	82	0.58082	0.235959	-0.235959	8837	0.742713	chr11	489247	490115	489247	TRUE	FALSE
chr11_48990176_48990485	0.641602	0.390869	-0.250732	615.5	-0.427307	409	403	83	8.60424e-10	9.06529	-9.06529	379	3.54306e-08	chr11	48990176	48990485	48990176	FALSE	TRUE
chr11_49069720_49070722	0.578613	0.387695	-0.190918	1177.5	-0.422764	442	408	82	1.50331e-09	8.82295	-8.82295	421	5.61077e-08	chr11	49069720	49070722	49069720	FALSE	TRUE
chr11_49455935_49456211	0.566406	0.51123	-0.0551758	3611	-0.14586	4754	372	77	0.0438887	1.35765	-1.35765	4884	0.119799	chr11	49455935	49456211	49455935	FALSE	FALSE
chr11_49839280_49839568	0.644531	0.35083	-0.293701	353.5	-0.462164	222	406	83	3.18089e-11	10.4975	-10.4975	204	2.36496e-09	chr11	49839280	49839568	49839280	FALSE	TRUE
chr11_49873117_49874152	0.611816	0.328857	-0.282959	411.5	-0.437198	347	407	83	3.37109e-10	9.47223	-9.47223	321	1.62785e-08	chr11	49873117	49874152	49873117	FALSE	TRUE
chr11_49913319_49914335	0.633789	0.387451	-0.246338	653	-0.470736	199	408	83	1.34294e-11	10.8719	-10.8719	177	1.1334e-09	chr11	49913319	49914335	49913319	FALSE	TRUE
chr11_49914943_49915372	0.395752	0.162476	-0.233276	766	-0.421921	451	393	81	2.20237e-09	8.65711	-8.65711	450	7.66983e-08	chr11	49914943	49915372	49914943	FALSE	TRUE
chr11_50227031_50227326	0.480469	0.331543	-0.148926	1716.5	-0.340672	1229	385	82	1.26061e-06	5.89942	-5.89942	1222	1.56936e-05	chr11	50227031	50227326	50227031	FALSE	TRUE
chr11_50257255_50257772	0.665527	0.484619	-0.180908	1293	-0.402085	601	399	81	1.14114e-08	7.94266	-7.94266	604	2.93688e-07	chr11	50257255	50257772	50257255	FALSE	TRUE
chr11_504189_504659	0.902344	0.900391	-0.00195312	8493	0.018726	11849	394	82	0.789859	0.102451	0.102451	11848	0.885095	chr11	504189	504659	504189	TRUE	FALSE
chr11_506353_508009	0.0128555	0.011734	-0.00112152	9254	-0.0220049	9664	409	83	0.752119	0.123714	-0.123714	9648	0.862726	chr11	506353	508009	506353	TRUE	FALSE
chr11_518682_520297	0.0557556	0.06073	0.00497437	15207.5	0.0761117	14713	390	79	0.285933	0.543736	0.543736	14655	0.476369	chr11	518682	520297	518682	TRUE	TRUE
chr11_534691_537718	0.130859	0.156738	0.0258789	16895	0.102498	15741	410	83	0.140737	0.851593	0.851593	15765	0.290082	chr11	534691	537718	534691	TRUE	FALSE
chr11_541896_542227	0.949219	0.902344	-0.046875	3846.5	-0.141132	4898	138	21	0.292178	0.534353	-0.534353	7201	0.483701	chr11	541896	542227	541896	TRUE	TRUE
chr11_554713_556560	0.31958	0.290039	-0.029541	4512	-0.0189833	9814	410	83	0.785257	0.104988	-0.104988	9801	0.883108	chr11	554713	556560	554713	TRUE	TRUE
chr11_55640068_55641085	0.692383	0.395996	-0.296387	341	-0.408487	550	408	83	4.37336e-09	8.35918	-8.35918	517	1.3216e-07	chr11	55640068	55641085	55640068	FALSE	TRUE
chr11_560382_561397	0.0187378	0.0287933	0.0100555	15942	0.188557	17466	406	83	0.00676798	2.16954	2.16954	17486	0.025422	chr11	560382	561397	560382	TRUE	FALSE
chr11_567938_569461	0.10022	0.106201	0.00598145	15414	0.0166253	11729	408	83	0.811511	0.0907055	0.0907055	11734	0.89618	chr11	567938	569461	567938	TRUE	FALSE
chr11_57091614_57092831	0.0115356	0.0114594	-7.62939e-05	10742	-0.0163785	9984	409	83	0.814223	0.0892568	-0.0892568	9977	0.897739	chr11	57091614	57092831	57091614	FALSE	FALSE
chr11_57102841_57103430	0.00504303	0.0078125	0.00276947	14383.5	0.092015	15354	398	82	0.181418	0.741319	0.741319	15418	0.348712	chr11	57102841	57103430	57102841	FALSE	FALSE
chr11_57194340_57194650	0.19165	0.0265045	-0.165161	1479	-0.427168	412	396	82	1.11895e-09	8.95119	-8.95119	404	4.34949e-08	chr11	57194340	57194650	57194340	FALSE	TRUE
chr11_57225812_57226094	0.0439758	0.0700073	0.0260315	16902.5	0.132653	16589	392	83	0.0575358	1.24006	1.24006	16593	0.148381	chr11	57225812	57226094	57225812	FALSE	FALSE
chr11_57226766_57228707	0.069397	0.0836182	0.0142212	16304	0.0944896	15447	405	82	0.177112	0.751752	0.751752	15460	0.343091	chr11	57226766	57228707	57226766	FALSE	FALSE
chr11_57243681_57244463	0.134644	0.303467	0.168823	18402	0.0819396	14967	407	83	0.239285	0.621085	0.621085	14986	0.423267	chr11	57243681	57244463	57243681	FALSE	FALSE
chr11_57249946_57250848	0.231934	0.189575	-0.0423584	3998	-0.108581	5937	408	83	0.118792	0.925212	-0.925212	5899	0.256446	chr11	57249946	57250848	57249946	FALSE	FALSE
chr11_57267006_57267316	0.051239	0.0401001	-0.0111389	5819	-0.0759661	7119	397	82	0.278714	0.554841	-0.554841	7119	0.468297	chr11	57267006	57267316	57267006	FALSE	FALSE
chr11_57281671_57283305	0.0980225	0.113708	0.015686	16405.5	0.0241258	12147	410	83	0.729041	0.137248	0.137248	12161	0.847324	chr11	57281671	57283305	57281671	FALSE	FALSE
chr11_57334971_57335486	0.0156021	0.0133438	-0.0022583	8286	-0.113643	5745	395	81	0.10696	0.970777	-0.970777	5761	0.237639	chr11	57334971	57335486	57334971	FALSE	FALSE
chr11_57424937_57425262	0.00312424	0.00283813	-0.000286102	10375.5	-0.0142426	10109	397	81	0.839807	0.0758207	-0.0758207	10113	0.912943	chr11	57424937	57425262	57424937	FALSE	FALSE
chr11_57435204_57436146	0.00820923	0.00883484	0.00062561	11992	0.0700693	14451	405	82	0.316769	0.499258	0.499258	14453	0.509484	chr11	57435204	57436146	57435204	FALSE	FALSE
chr11_57479486_57480308	0.00428391	0.00419617	-8.7738e-05	10727.5	0.00920732	11353	400	82	0.8956	0.0478858	0.0478858	11354	0.946124	chr11	57479486	57480308	57479486	FALSE	FALSE
chr11_57508730_57509569	0.00777435	0.00927734	0.00150299	13285.5	0.0500785	13503	404	82	0.474432	0.323826	0.323826	13506	0.658832	chr11	57508730	57509569	57508730	FALSE	FALSE
chr11_575464_577093	0.00644684	0.00946045	0.00301361	14529	0.214075	17729	406	82	0.00221772	2.65409	2.65409	17737	0.0099144	chr11	575464	577093	575464	TRUE	FALSE
chr11_58345673_58347321	0.0393066	0.0326233	-0.00668335	6629	-0.100065	6240	406	83	0.150751	0.821741	-0.821741	6194	0.305314	chr11	58345673	58347321	58345673	FALSE	FALSE
chr11_58873889_58874486	0.0102005	0.00753784	-0.00266266	8062.5	-0.0927493	6483	381	80	0.182862	0.737876	-0.737876	6444	0.350604	chr11	58873889	58874486	58873889	FALSE	FALSE
chr11_58939046_58940308	0.0145111	0.0109787	-0.00353241	7608	-0.0734168	7232	406	83	0.291825	0.534877	-0.534877	7196	0.483458	chr11	58939046	58940308	58939046	FALSE	FALSE
chr11_59382687_59382929	0.0108032	0.00923157	-0.00157166	8810.5	0.0176937	11800	397	82	0.800343	0.0967236	0.0967236	11802	0.891178	chr11	59382687	59382929	59382687	FALSE	FALSE
chr11_59383165_59383410	0.00166702	0.000880241	-0.000786781	9651	-0.0384268	8854	392	79	0.573374	0.241562	-0.241562	8804	0.737065	chr11	59383165	59383410	59383165	FALSE	FALSE
chr11_59436201_59437232	0.0214233	0.0192108	-0.00221252	8304	-0.0512569	8224.5	405	83	0.461915	0.335438	-0.335438	8191	0.648419	chr11	59436201	59437232	59436201	FALSE	FALSE
chr11_59522425_59523303	0.0316162	0.0284424	-0.00317383	7782	-0.0704674	7350	406	82	0.3141	0.502931	-0.502931	7346	0.506889	chr11	59522425	59523303	59522425	FALSE	FALSE
chr11_59578090_59578379	0.0042038	0.00534821	0.00114441	12784	0.0522355	13608	397	80	0.460038	0.337207	0.337207	13593	0.646856	chr11	59578090	59578379	59578090	FALSE	FALSE
chr11_60609392_60609786	0.00889587	0.00848389	-0.000411987	10189	0.00276382	11011	398	80	0.969211	0.0135817	0.0135817	11011	0.984822	chr11	60609392	60609786	60609392	FALSE	FALSE
chr11_60619924_60621111	0.9375	0.95166	0.0141602	16298.5	0.217773	17763	399	83	0.00179046	2.74703	2.74703	17775	0.00824789	chr11	60619924	60621111	60619924	FALSE	FALSE
chr11_60673597_60674184	0.00429535	0.00430679	1.14441e-05	10949	0.0229819	12091	400	83	0.741821	0.129701	0.129701	12094	0.855624	chr11	60673597	60674184	60673597	FALSE	FALSE
chr11_60681552_60682268	0.00961304	0.00942993	-0.000183105	10559	-0.0112429	10271	397	82	0.871189	0.0598876	-0.0598876	10260	0.93118	chr11	60681552	60682268	60681552	FALSE	FALSE
chr11_60691785_60692532	0.0100555	0.0103912	0.000335693	11482.5	-0.0215863	9691	408	83	0.756716	0.121067	-0.121067	9680	0.864554	chr11	60691785	60692532	60691785	FALSE	FALSE
chr11_60701682_60702219	0.933105	0.912109	-0.0209961	4948.5	-0.0817222	6870	387	83	0.242566	0.61517	-0.61517	6866	0.427014	chr11	60701682	60702219	60701682	FALSE	TRUE
chr11_60718428_60718888	0.921875	0.915527	-0.00634766	6694	-0.063786	7643	384	81	0.366951	0.435392	-0.435392	7666	0.5606	chr11	60718428	60718888	60718428	FALSE	TRUE
chr11_60775036_60776307	0.519531	0.481689	-0.0378418	4167.5	-0.182322	3925	403	82	0.00922591	2.03499	-2.03499	3898	0.032983	chr11	60775036	60776307	60775036	FALSE	TRUE
chr11_60928560_60929262	0.0234375	0.0204315	-0.00300598	7850	-0.048044	8380	405	83	0.49048	0.309379	-0.309379	8366	0.67156	chr11	60928560	60929262	60928560	FALSE	FALSE
chr11_61061751_61063063	0.227539	0.341064	0.113525	18165.5	0.252128	18048	409	83	0.000290817	3.53638	3.53638	18058	0.00172374	chr11	61061751	61063063	61061751	FALSE	FALSE
chr11_61100073_61100972	0.0151062	0.0124512	-0.00265503	8068	-0.110834	5847	396	82	0.113988	0.943143	-0.943143	5840	0.249064	chr11	61100073	61100972	61100073	FALSE	FALSE
chr11_61106710_61106927	0.958008	0.9375	-0.0205078	4969.5	-0.171382	4164	380	80	0.0158849	1.79901	-1.79901	4214	0.051977	chr11	61106710	61106927	61106710	FALSE	FALSE
chr11_61129221_61129879	0.0122604	0.0145416	0.00228119	14038.5	0.046909	13346	404	82	0.503036	0.298401	0.298401	13349	0.681432	chr11	61129221	61129879	61129221	FALSE	FALSE
chr11_61159836_61160285	0.0196228	0.0399475	0.0203247	16667.5	0.333155	18434	405	83	1.71669e-06	5.76531	5.76531	18438	2.05257e-05	chr11	61159836	61160285	61159836	FALSE	FALSE
chr11_611691_611943	0.916992	0.91748	0.000488281	11778.5	0.0145615	11641	382	80	0.837978	0.0767673	0.0767673	11621	0.911751	chr11	611691	611943	611691	TRUE	FALSE
chr11_61196921_61197697	0.00662994	0.00691223	0.000282288	11400	-0.00890244	10365.5	400	82	0.899185	0.0461508	-0.0461508	10370	0.947853	chr11	61196921	61197697	61196921	FALSE	FALSE
chr11_61275825_61277329	0.240356	0.374512	0.134155	18273.5	0.390178	18593	408	83	2.0667e-08	7.68472	7.68472	18598	4.91393e-07	chr11	61275825	61277329	61275825	FALSE	TRUE
chr11_61322732_61323285	0.261719	0.0678711	-0.193848	1153.5	-0.498398	111	397	81	1.51997e-12	11.8182	-11.8182	115	2.01972e-10	chr11	61322732	61323285	61322732	FALSE	TRUE
chr11_61335112_61335340	0.158691	0.193359	0.034668	17182	0.0991789	15622	370	79	0.166324	0.779046	0.779046	15547	0.328129	chr11	61335112	61335340	61335112	FALSE	FALSE
chr11_61347808_61349038	0.0262756	0.032959	0.00668335	15512	0.121681	16286	406	82	0.0821106	1.0856	1.0856	16289	0.194885	chr11	61347808	61349038	61347808	FALSE	FALSE
chr11_61355038_61355363	0.0437622	0.111084	0.0673218	17770	0.128736	16486	382	79	0.0714061	1.14626	1.14626	16412	0.175136	chr11	61355038	61355363	61355038	FALSE	FALSE
chr11_61447599_61448273	0.0266724	0.031311	0.00463867	15110.5	0.00492611	11125	406	82	0.944216	0.0249287	0.0249287	11124	0.971597	chr11	61447599	61448273	61447599	FALSE	FALSE
chr11_614760_616068	0.271973	0.258301	-0.0136719	5541	0.00162201	10937	406	82	0.981848	0.00795558	0.00795558	10937	0.990779	chr11	614760	616068	614760	TRUE	FALSE
chr11_61511041_61511584	0.935547	0.93457	-0.000976562	9429.5	-0.025942	9478	385	81	0.713741	0.14646	-0.14646	9484	0.836104	chr11	61511041	61511584	61511041	FALSE	FALSE
chr11_61544727_61545563	0.860352	0.619141	-0.241211	692.5	-0.311868	1618	403	82	8.43521e-06	5.0739	-5.0739	1592	7.98192e-05	chr11	61544727	61545563	61544727	FALSE	FALSE
chr11_61559907_61560549	0.00614929	0.00759125	0.00144196	13178.5	0.0462195	13308	402	81	0.51094	0.29163	0.29163	13297	0.68724	chr11	61559907	61560549	61559907	FALSE	FALSE
chr11_61582573_61584728	0.0263977	0.0202179	-0.00617981	6742.5	-0.206347	3390	410	83	0.00301738	2.52037	-2.52037	3339	0.0128515	chr11	61582573	61584728	61582573	FALSE	FALSE
chr11_61594996_61596710	0.0999146	0.147949	0.0480347	17493	0.106465	15867	410	83	0.125996	0.899645	0.899645	15896	0.267496	chr11	61594996	61596710	61594996	FALSE	FALSE
chr11_61658569_61659592	0.00922394	0.0102386	0.00101471	12612	0.0701525	14457	406	83	0.313815	0.503327	0.503327	14477	0.506662	chr11	61658569	61659592	61658569	FALSE	FALSE
chr11_61684591_61685216	0.0204468	0.0213623	0.000915527	12451	-0.0204789	9745	403	83	0.769105	0.114014	-0.114014	9735	0.872431	chr11	61684591	61685216	61684591	FALSE	FALSE
chr11_617226_617797	0.939941	0.938965	-0.000976562	9429.5	0.000650017	10890	370	79	0.993138	0.00299034	0.00299034	10888	0.996905	chr11	617226	617797	617226	TRUE	FALSE
chr11_61722744_61723483	0.756348	0.804688	0.0483398	17497	0.169302	17227	401	82	0.0156665	1.80503	1.80503	17231	0.0513968	chr11	61722744	61723483	61722744	FALSE	FALSE
chr11_61734760_61735932	0.0463257	0.0490112	0.00268555	14337.5	0.0402101	12994	406	83	0.563845	0.24884	0.24884	13001	0.729068	chr11	61734760	61735932	61734760	FALSE	FALSE
chr11_61891198_61891726	0.00622177	0.00625229	3.05176e-05	10985	0.0242151	12154	406	83	0.728241	0.137725	0.137725	12164	0.846895	chr11	61891198	61891726	61891198	FALSE	FALSE
chr11_62104779_62105636	0.0209808	0.0231323	0.00215149	13941.5	0.053131	13662	405	83	0.445716	0.350941	0.350941	13678	0.634113	chr11	62104779	62105636	62104779	FALSE	FALSE
chr11_62211989_62212196	0.843262	0.583008	-0.260254	543	-0.237782	2780	399	80	0.000784631	3.10533	-3.10533	2800	0.00406775	chr11	62211989	62212196	62211989	FALSE	TRUE
chr11_62313282_62314314	0.00868988	0.00786591	-0.000823975	9611.5	-0.0106899	10292	397	82	0.87912	0.0559517	-0.0559517	10295	0.935757	chr11	62313282	62314314	62313282	FALSE	FALSE
chr11_62341228_62341695	0.0499878	0.0444336	-0.0055542	6887.5	-0.161181	4373	410	83	0.0205217	1.68779	-1.68779	4343	0.0645126	chr11	62341228	62341695	62341228	FALSE	FALSE
chr11_62358813_62359674	0.00787354	0.0099411	0.00206757	13859	0.0554336	13777	406	83	0.426039	0.370551	0.370551	13795	0.617675	chr11	62358813	62359674	62358813	FALSE	FALSE
chr11_62368454_62370491	0.135986	0.239624	0.103638	18094	0.287188	18250	410	83	3.65774e-05	4.43679	4.43679	18255	0.000284127	chr11	62368454	62370491	62368454	FALSE	FALSE
chr11_62379638_62380556	0.0326538	0.0259705	-0.00668335	6629	-0.152551	4574	408	83	0.0283971	1.54673	-1.54673	4535	0.0846134	chr11	62379638	62380556	62379638	FALSE	FALSE
chr11_62389337_62389791	0.00528336	0.00514221	-0.000141144	10645	0.0474825	13377	404	82	0.497826	0.302922	0.302922	13384	0.678002	chr11	62389337	62389791	62389337	FALSE	FALSE
chr11_62413632_62414293	0.00496292	0.00563049	0.000667572	12053	0.0259259	12239	405	82	0.711089	0.148076	0.148076	12243	0.834407	chr11	62413632	62414293	62413632	FALSE	FALSE
chr11_62420544_62420924	0.00439072	0.00539017	0.000999451	12595.5	0.0998661	15644	405	83	0.151524	0.819518	0.819518	15673	0.306351	chr11	62420544	62420924	62420544	FALSE	FALSE
chr11_62432319_62433417	0.010498	0.0116272	0.00112915	12767.5	0.09665	15535	410	83	0.164836	0.782947	0.782947	15563	0.326019	chr11	62432319	62433417	62432319	FALSE	FALSE
chr11_62439047_62439803	0.00881195	0.0092926	0.000480652	11747	0.0668154	14297	405	83	0.337394	0.471863	0.471863	14311	0.53072	chr11	62439047	62439803	62439047	FALSE	FALSE
chr11_62446038_62446613	0.0154343	0.0148621	-0.000572205	9932	-0.0402908	8770	401	83	0.563475	0.249125	-0.249125	8754	0.728791	chr11	62446038	62446613	62446038	FALSE	FALSE
chr11_62455073_62455868	0.864258	0.814453	-0.0498047	3744	-0.242368	2686	402	81	0.000575603	3.23988	-3.23988	2683	0.00312594	chr11	62455073	62455868	62455073	FALSE	TRUE
chr11_62473453_62474156	0.010582	0.0166168	0.00603485	15418	0.070423	14465	395	82	0.314082	0.502957	0.502957	14474	0.506889	chr11	62473453	62474156	62473453	FALSE	FALSE
chr11_62493994_62495127	0.00984192	0.00967407	-0.000167847	10597.5	-0.0196907	9777	402	83	0.777814	0.109124	-0.109124	9769	0.878693	chr11	62493994	62495127	62493994	FALSE	FALSE
chr11_62554066_62555262	0.0072937	0.00804901	0.00075531	12186.5	0.0633185	14142	406	82	0.365717	0.436855	0.436855	14147	0.559281	chr11	62554066	62555262	62554066	FALSE	FALSE
chr11_6255768_6256179	0.00362206	0.00349808	-0.000123978	10660.5	-0.007291	10455	403	81	0.917689	0.0373044	-0.0373044	10454	0.958354	chr11	6255768	6256179	6255768	TRUE	FALSE
chr11_62572710_62573149	0.00356293	0.00333786	-0.000225067	10488	-0.0180872	9867	403	83	0.795333	0.0994511	-0.0994511	9856	0.888625	chr11	62572710	62573149	62572710	FALSE	FALSE
chr11_62598679_62600064	0.00920868	0.00918579	-2.28882e-05	10834.5	0.0169743	11756	406	83	0.807695	0.0927528	0.0927528	11763	0.894655	chr11	62598679	62600064	62598679	FALSE	FALSE
chr11_62606541_62607120	0.00322342	0.00285721	-0.000366211	10259	-0.0381877	8862	401	83	0.581424	0.235507	-0.235507	8841	0.743165	chr11	62606541	62607120	62606541	FALSE	FALSE
chr11_62648237_62649161	0.0192719	0.0128098	-0.0064621	6657	-0.0701093	7367	409	83	0.313816	0.503325	-0.503325	7344	0.506662	chr11	62648237	62649161	62648237	FALSE	FALSE
chr11_626728_628037	0.847656	0.826172	-0.0214844	4926.5	-0.0889724	6623	399	82	0.20436	0.689604	-0.689604	6607	0.378873	chr11	626728	628037	626728	TRUE	TRUE
chr11_62693373_62694772	0.658203	0.555176	-0.103027	2504	-0.178009	4002	406	81	0.0113865	1.94361	-1.94361	3999	0.0395364	chr11	62693373	62694772	62693373	FALSE	TRUE
chr11_6281076_6281307	0.287842	0.198853	-0.0889893	2780	-0.134812	5079	374	81	0.057048	1.24376	-1.24376	5117	0.147326	chr11	6281076	6281307	6281076	TRUE	TRUE
chr11_6292256_6292693	0.879883	0.833984	-0.0458984	3875	-0.186181	3842	384	79	0.00913229	2.03942	-2.03942	3894	0.0327031	chr11	6292256	6292693	6292256	TRUE	TRUE
chr11_63258378_63258804	0.303223	0.291504	-0.0117188	5752	-0.0405806	8756	363	78	0.574051	0.241049	-0.241049	8806	0.737797	chr11	63258378	63258804	63258378	FALSE	TRUE
chr11_63381143_63382096	0.0242615	0.0298767	0.00561523	15340	0.0261534	12252	401	80	0.711928	0.147564	0.147564	12236	0.834868	chr11	63381143	63382096	63381143	FALSE	FALSE
chr11_6340445_6341909	0.499023	0.0797119	-0.419434	57	-0.361913	966	381	81	3.09799e-07	6.50892	-6.50892	991	4.76418e-06	chr11	6340445	6341909	6340445	TRUE	TRUE
chr11_63438301_63439314	0.0132599	0.0159149	0.00265503	14319	0.106772	15877	406	83	0.125202	0.902388	0.902388	15901	0.266204	chr11	63438301	63439314	63438301	FALSE	FALSE
chr11_63448704_63449386	0.0271606	0.024826	-0.00233459	8251	-0.102512	6157	402	81	0.145409	0.837407	-0.837407	6149	0.297228	chr11	63448704	63449386	63448704	FALSE	FALSE
chr11_63529888_63531834	0.806641	0.857422	0.0507812	17531.5	0.200588	17598	410	83	0.0039369	2.40485	2.40485	17616	0.0161087	chr11	63529888	63531834	63529888	FALSE	FALSE
chr11_63535652_63537435	0.0837402	0.0723267	-0.0114136	5789	-0.0462686	8485	407	83	0.506498	0.295423	-0.295423	8465	0.683509	chr11	63535652	63537435	63535652	FALSE	FALSE
chr11_63580537_63581740	0.0371094	0.0324097	-0.00469971	7168	-0.152709	4573	409	83	0.0282056	1.54966	-1.54966	4533	0.0840962	chr11	63580537	63581740	63580537	FALSE	FALSE
chr11_63606114_63607474	0.040802	0.0355225	-0.00527954	6977	-0.0749109	7169	409	83	0.281815	0.550036	-0.550036	7137	0.471806	chr11	63606114	63607474	63606114	FALSE	FALSE
chr11_63683743_63684628	0.0947266	0.105896	0.0111694	16047	0.0352754	12748	402	83	0.612981	0.212553	0.212553	12762	0.767088	chr11	63683743	63684628	63683743	FALSE	FALSE
chr11_63685489_63685968	0.109192	0.11084	0.00164795	13452.5	0.0345373	12706	393	82	0.622869	0.205603	0.205603	12712	0.774335	chr11	63685489	63685968	63685489	FALSE	FALSE
chr11_636906_640628	0.847656	0.837402	-0.0102539	5935.5	-0.0072583	10457	410	83	0.917232	0.0375209	-0.0375209	10450	0.958209	chr11	636906	640628	636906	TRUE	FALSE
chr11_63706029_63706868	0.00793457	0.00848389	0.000549316	11878	0.0194924	11899	403	83	0.77995	0.107933	0.107933	11903	0.87978	chr11	63706029	63706868	63706029	FALSE	FALSE
chr11_63741900_63742614	0.0116348	0.0119019	0.000267029	11375	-0.0171522	9933	401	82	0.806767	0.0932519	-0.0932519	9931	0.89429	chr11	63741900	63742614	63741900	FALSE	FALSE
chr11_63753414_63754454	0.0354309	0.0264435	-0.00898743	6137	-0.275599	2174	407	83	7.52568e-05	4.12345	-4.12345	2115	0.000530279	chr11	63753414	63754454	63753414	FALSE	FALSE
chr11_63766058_63768666	0.791504	0.822266	0.0307617	17068	0.0571403	13858	408	83	0.411836	0.385276	0.385276	13872	0.603957	chr11	63766058	63768666	63766058	FALSE	FALSE
chr11_63775346_63775613	0.450684	0.452881	0.00219727	13975	-0.00160637	10768	394	79	0.982371	0.00772429	-0.00772429	10771	0.990863	chr11	63775346	63775613	63775346	FALSE	FALSE
chr11_63803375_63804365	0.0964355	0.0715942	-0.0248413	4732	-0.187416	3807	405	83	0.0071241	2.14727	-2.14727	3763	0.0265309	chr11	63803375	63804365	63803375	FALSE	FALSE
chr11_63883855_63885182	0.972656	0.967773	-0.00488281	7104	-0.142486	4861	399	81	0.0430508	1.36602	-1.36602	4867	0.117958	chr11	63883855	63885182	63883855	FALSE	TRUE
chr11_63932990_63934070	0.0105438	0.0132751	0.00273132	14359	0.144672	16821	409	82	0.0385962	1.41346	1.41346	16824	0.108335	chr11	63932990	63934070	63932990	FALSE	FALSE
chr11_63952677_63954228	0.011673	0.013031	0.00135803	13084	0.0793049	14830	407	83	0.254734	0.593913	0.593913	14861	0.440977	chr11	63952677	63954228	63952677	FALSE	FALSE
chr11_63993589_63993834	0.00623322	0.00777817	0.00154495	13339.5	0.115961	16149	392	81	0.0999959	1.00002	1.00002	16135	0.226253	chr11	63993589	63993834	63993589	FALSE	FALSE
chr11_63997662_63998412	0.0303802	0.0332031	0.00282288	14412.5	0.0240074	12141	406	83	0.73051	0.136374	0.136374	12153	0.847955	chr11	63997662	63998412	63997662	FALSE	FALSE
chr11_64001572_64002712	0.045105	0.0389709	-0.00613403	6748.5	-0.0587129	7857	410	83	0.398883	0.399154	-0.399154	7837	0.591837	chr11	64001572	64002712	64001572	FALSE	FALSE
chr11_64008283_64009487	0.00746918	0.00963593	0.00216675	13957.5	0.122041	16297	406	82	0.0811825	1.09054	1.09054	16300	0.193245	chr11	64008283	64009487	64008283	FALSE	FALSE
chr11_64013772_64015341	0.165527	0.152344	-0.0131836	5591	-0.0735913	7219	406	82	0.293115	0.532962	-0.532962	7209	0.484617	chr11	64013772	64015341	64013772	FALSE	FALSE
chr11_64018435_64019377	0.0102921	0.013031	0.00273895	14363	0.127552	16455	409	83	0.0668187	1.1751	1.1751	16479	0.166811	chr11	64018435	64019377	64018435	FALSE	FALSE
chr11_64025913_64026736	0.949707	0.942383	-0.00732422	6489	-0.0768598	7076	390	81	0.276264	0.558676	-0.558676	7098	0.4656	chr11	64025913	64026736	64025913	FALSE	FALSE
chr11_64036875_64037974	0.00551987	0.00634003	0.00082016	12292	0.073502	14610	405	82	0.293769	0.531994	0.531994	14606	0.485068	chr11	64036875	64037974	64036875	FALSE	FALSE
chr11_64052607_64053652	0.0177307	0.014679	-0.00305176	7829.5	-0.176021	4057	410	83	0.0114059	1.94287	-1.94287	4003	0.0395742	chr11	64052607	64053652	64052607	FALSE	FALSE
chr11_64058808_64060118	0.251221	0.212646	-0.0385742	4142	-0.156537	4483	406	83	0.0245746	1.60951	-1.60951	4443	0.0751232	chr11	64058808	64060118	64058808	FALSE	TRUE
chr11_64066757_64068741	0.238037	0.186523	-0.0515137	3695	-0.0262278	9454	407	83	0.706634	0.150805	-0.150805	9444	0.831888	chr11	64066757	64068741	64066757	FALSE	FALSE
chr11_64072064_64073914	0.0202637	0.023407	0.00314331	14594.5	0.0353218	12753	410	83	0.611907	0.213315	0.213315	12767	0.76637	chr11	64072064	64073914	64072064	FALSE	FALSE
chr11_64084646_64086057	0.0124741	0.00996399	-0.00251007	8128	-0.0615435	7742	407	83	0.376776	0.423916	-0.423916	7720	0.570493	chr11	64084646	64086057	64084646	FALSE	FALSE
chr11_64109822_64110228	0.0341797	0.0612793	0.0270996	16940	0.177234	17328	392	82	0.011517	1.93866	1.93866	17337	0.0398786	chr11	64109822	64110228	64109822	FALSE	FALSE
chr11_6411346_6411913	0.0188446	0.0136108	-0.00523376	6990.5	-0.159707	4408	396	82	0.0227729	1.64258	-1.64258	4401	0.0704429	chr11	6411346	6411913	6411346	TRUE	FALSE
chr11_64126430_64126960	0.00813293	0.00901031	0.00087738	12395.5	0.0851703	15096	405	83	0.221285	0.655048	0.655048	15115	0.400872	chr11	64126430	64126960	64126430	FALSE	FALSE
chr11_64136814_64138187	0.960938	0.96582	0.00488281	15168	0.0812077	14935	393	82	0.247294	0.606786	0.606786	14925	0.432817	chr11	64136814	64138187	64136814	FALSE	TRUE
chr11_64335489_64335965	0.836426	0.729492	-0.106934	2416	-0.238222	2770	395	82	0.000683501	3.16526	-3.16526	2745	0.00361958	chr11	64335489	64335965	64335489	FALSE	TRUE
chr11_64374818_64375766	0.698242	0.501465	-0.196777	1116	-0.363958	945	398	83	1.80512e-07	6.74349	-6.74349	911	3.02241e-06	chr11	64374818	64375766	64374818	FALSE	TRUE
chr11_643879_644377	0.889648	0.879883	-0.00976562	6002.5	-0.100617	6222	410	83	0.148169	0.829243	-0.829243	6173	0.301389	chr11	643879	644377	643879	TRUE	FALSE
chr11_6439863_6440732	0.0273743	0.0206146	-0.00675964	6615	-0.13628	5043	392	83	0.0510195	1.29226	-1.29226	5018	0.134938	chr11	6439863	6440732	6439863	TRUE	FALSE
chr11_64409877_64411253	0.213623	0.163696	-0.0499268	3737.5	-0.207611	3364	410	83	0.0028439	2.54609	-2.54609	3311	0.0122237	chr11	64409877	64411253	64409877	FALSE	TRUE
chr11_64480199_64481344	0.359375	0.41748	0.0581055	17646	-0.0237865	9580	404	82	0.734331	0.134108	-0.134108	9570	0.850753	chr11	64480199	64481344	64480199	FALSE	FALSE
chr11_64490493_64491146	0.03125	0.0213013	-0.00994873	5974.5	-0.168715	4232	387	82	0.0161597	1.79157	-1.79157	4222	0.0527563	chr11	64490493	64491146	64490493	FALSE	FALSE
chr11_64509433_64513826	0.172363	0.1604	-0.0119629	5726	-0.11243	5787	410	83	0.106129	0.974165	-0.974165	5755	0.236184	chr11	64509433	64513826	64509433	FALSE	TRUE
chr11_64545666_64546684	0.0117798	0.013031	0.00125122	12937.5	0.0976945	15575	405	83	0.160758	0.793828	0.793828	15593	0.319944	chr11	64545666	64546684	64545666	FALSE	FALSE
chr11_64570248_64570901	0.0447388	0.0451965	0.000457764	11711	-0.042719	8645	405	83	0.539844	0.267732	-0.267732	8631	0.710489	chr11	64570248	64570901	64570248	FALSE	FALSE
chr11_64577277_64578349	0.0276947	0.0271149	-0.000579834	9922	-0.00916134	10354	409	83	0.895577	0.0478972	-0.0478972	10352	0.946124	chr11	64577277	64578349	64577277	FALSE	FALSE
chr11_64594521_64595266	0.931641	0.75293	-0.178711	1325	-0.513058	80	381	80	5.25527e-13	12.2794	-12.2794	91	8.79131e-11	chr11	64594521	64595266	64594521	FALSE	TRUE
chr11_64596975_64597519	0.834473	0.751465	-0.0830078	2893	-0.31467	1576	391	83	6.6493e-06	5.17722	-5.17722	1537	6.51916e-05	chr11	64596975	64597519	64596975	FALSE	TRUE
chr11_64611714_64612634	0.0316772	0.0678101	0.0361328	17229.5	0.295211	18279	400	83	2.29019e-05	4.64013	4.64013	18281	0.000190031	chr11	64611714	64612634	64611714	FALSE	FALSE
chr11_64621207_64622246	0.83252	0.861328	0.0288086	17010.5	0.120618	16261	387	81	0.0876661	1.05717	1.05717	16238	0.204904	chr11	64621207	64622246	64621207	FALSE	FALSE
chr11_64645429_64646566	0.00571442	0.00588226	0.000167847	11214.5	0.0596489	13973	407	83	0.39169	0.407057	0.407057	13989	0.584851	chr11	64645429	64646566	64645429	FALSE	FALSE
chr11_64684599_64684826	0	0	0	10903.5	0.00602287	11187	372	79	0.924224	0.034223	0.034223	11224	0.962095	chr11	64684599	64684826	64684599	FALSE	FALSE
chr11_64692060_64692496	0.0100861	0.00649261	-0.00359344	7585	-0.143323	4822	400	82	0.0407718	1.38964	-1.38964	4818	0.11307	chr11	64692060	64692496	64692060	FALSE	FALSE
chr11_64739010_64739750	0.760742	0.693359	-0.0673828	3286	-0.046748	8457	390	82	0.505833	0.295992	-0.295992	8461	0.683098	chr11	64739010	64739750	64739010	FALSE	TRUE
chr11_6477603_6478178	0.969238	0.974121	0.00488281	15168	0.0240342	12142	385	79	0.73647	0.132845	0.132845	12123	0.852338	chr11	6477603	6478178	6477603	TRUE	FALSE
chr11_64781450_64782385	0.00484085	0.00748062	0.00263977	14313	0.17284	17261	399	81	0.0140443	1.8525	1.8525	17265	0.0469632	chr11	64781450	64782385	64781450	FALSE	FALSE
chr11_64794832_64795362	0.00344276	0.00389481	0.000452042	11704	0.0799742	14867	387	80	0.256502	0.590909	0.590909	14843	0.442746	chr11	64794832	64795362	64794832	FALSE	FALSE
chr11_64808330_64809264	0.0134354	0.0136719	0.000236511	11318	-0.0144164	10102	407	83	0.83625	0.0776638	-0.0776638	10096	0.911052	chr11	64808330	64809264	64808330	FALSE	FALSE
chr11_64815040_64815722	0.911133	0.914551	0.00341797	14722.5	-0.0218522	9672	394	82	0.755757	0.121618	-0.121618	9677	0.864078	chr11	64815040	64815722	64815040	FALSE	TRUE
chr11_64851302_64851828	0.00559235	0.00715637	0.00156403	13359	0.0835944	15041	402	81	0.234015	0.630756	0.630756	15024	0.416857	chr11	64851302	64851828	64851302	FALSE	FALSE
chr11_64863698_64863980	0.0890503	0.0548401	-0.0342102	4306	-0.451362	277	406	83	8.99771e-11	10.0459	-10.0459	251	5.50918e-09	chr11	64863698	64863980	64863698	FALSE	FALSE
chr11_64875134_64876243	0.946777	0.945801	-0.000976562	9429.5	-0.0537373	8099	402	83	0.440827	0.355732	-0.355732	8080	0.630267	chr11	64875134	64876243	64875134	FALSE	FALSE
chr11_64879046_64880413	0.0644531	0.112122	0.0476685	17486.5	0.491171	18706	408	83	1.69442e-12	11.771	11.771	18710	2.17443e-10	chr11	64879046	64880413	64879046	FALSE	FALSE
chr11_64884115_64885448	0.029892	0.0294647	-0.000427246	10161.5	0.0264883	12271	408	83	0.703793	0.152555	0.152555	12280	0.829757	chr11	64884115	64885448	64884115	FALSE	FALSE
chr11_64901526_64902107	0.00657272	0.00782013	0.00124741	12932	0.133425	16600	406	82	0.0565835	1.24731	1.24731	16605	0.146444	chr11	64901526	64902107	64901526	FALSE	FALSE
chr11_6494725_6495453	0.0118332	0.0124664	0.00063324	12004.5	-0.0217178	9685	397	82	0.756275	0.12132	-0.12132	9678	0.864464	chr11	6494725	6495453	6494725	TRUE	FALSE
chr11_64948715_64949060	0.00698853	0.00828552	0.001297	12996	0.0510842	13549	392	80	0.469649	0.328226	0.328226	13532	0.654616	chr11	64948715	64949060	64948715	FALSE	FALSE
chr11_6502423_6502927	0.00759888	0.00812531	0.000526428	11846.5	0.0343766	12697	392	82	0.624501	0.204467	0.204467	12703	0.775391	chr11	6502423	6502927	6502423	TRUE	FALSE
chr11_65029040_65029926	0.00326538	0.0033474	8.2016e-05	11088	0.0115914	11480	404	82	0.868715	0.0611225	0.0611225	11480	0.929891	chr11	65029040	65029926	65029040	FALSE	FALSE
chr11_65081937_65083333	0.0170898	0.0144348	-0.00265503	8068	-0.040733	8750	407	83	0.558693	0.252827	-0.252827	8736	0.724607	chr11	65081937	65083333	65081937	FALSE	FALSE
chr11_65101109_65101843	0.0116119	0.00983429	-0.00177765	8635.5	-0.122962	5429	408	83	0.0770406	1.11328	-1.11328	5386	0.185722	chr11	65101109	65101843	65101109	FALSE	FALSE
chr11_65121938_65122712	0.0130997	0.0183411	0.00524139	15256	0.206021	17658	401	83	0.0031147	2.50658	2.50658	17670	0.0132119	chr11	65121938	65122712	65121938	FALSE	FALSE
chr11_65153726_65154606	0.0117798	0.0135193	0.0017395	13551	0.0734134	14607	402	82	0.294637	0.530713	0.530713	14603	0.486095	chr11	65153726	65154606	65153726	FALSE	FALSE
chr11_65189463_65190295	0.0171356	0.0153656	-0.00177002	8643.5	-0.0811699	6884	407	83	0.243711	0.613126	-0.613126	6874	0.428345	chr11	65189463	65190295	65189463	FALSE	FALSE
chr11_65244636_65245130	0.0105438	0.00992584	-0.000617981	9865	0.00101647	10910	403	83	0.9887	0.00493528	0.00493528	10910	0.994273	chr11	65244636	65245130	65244636	FALSE	FALSE
chr11_65246336_65246591	0.867188	0.902344	0.0351562	17196.5	0.0707008	14487	395	82	0.313644	0.503563	0.503563	14479	0.506545	chr11	65246336	65246591	65246336	FALSE	FALSE
chr11_65264957_65265398	0.00391388	0.00473022	0.000816345	12287	0.0644121	14188	401	82	0.357866	0.446279	0.446279	14186	0.551464	chr11	65264957	65265398	65264957	FALSE	FALSE
chr11_65292571_65292940	0.00638199	0.00618744	-0.00019455	10537	0.0238202	12128	392	80	0.737137	0.132451	0.132451	12120	0.852798	chr11	65292571	65292940	65292571	FALSE	FALSE
chr11_65305935_65308502	0.485352	0.551758	0.0664062	17758.5	0.32483	18408	409	83	3.03755e-06	5.51748	5.51748	18419	3.36954e-05	chr11	65305935	65308502	65305935	FALSE	FALSE
chr11_65313843_65314455	0.0603027	0.65918	0.598633	18725	0.516529	18720	408	82	1.52902e-13	12.8156	12.8156	18722	3.53675e-11	chr11	65313843	65314455	65313843	FALSE	FALSE
chr11_65314912_65315476	0.943848	0.953613	0.00976562	15912	0.110764	16001	391	81	0.116527	0.933573	0.933573	15979	0.252984	chr11	65314912	65315476	65314912	FALSE	TRUE
chr11_65321225_65321823	0.862793	0.899414	0.0366211	17246	0.155005	17005	383	79	0.0300014	1.52286	1.52286	16949	0.0882844	chr11	65321225	65321823	65321225	FALSE	TRUE
chr11_65325081_65326209	0.0852051	0.0541687	-0.0310364	4450	-0.316544	1546	410	83	5.36165e-06	5.2707	-5.2707	1480	5.44182e-05	chr11	65325081	65326209	65325081	FALSE	FALSE
chr11_65337213_65338474	0.0163574	0.0177307	0.00137329	13101	0.10479	15822	410	83	0.132063	0.879218	0.879218	15839	0.276989	chr11	65337213	65338474	65337213	FALSE	FALSE
chr11_65340117_65340483	0.00595093	0.00651169	0.00056076	11900	-0.0210312	9719	397	83	0.763337	0.117284	-0.117284	9713	0.868834	chr11	65340117	65340483	65340117	FALSE	FALSE
chr11_65341620_65342501	0.0301514	0.0278168	-0.00233459	8251	-0.026836	9428	409	83	0.700029	0.154884	-0.154884	9421	0.827335	chr11	65341620	65342501	65341620	FALSE	FALSE
chr11_65343329_65343849	0.0131378	0.0166321	0.00349426	14758.5	0.0807515	14911	407	82	0.248523	0.604634	0.604634	14914	0.434204	chr11	65343329	65343849	65343329	FALSE	FALSE
chr11_65352231_65353134	0.931152	0.938477	0.00732422	15614.5	0.0216867	12016	405	83	0.755791	0.121598	0.121598	12026	0.864078	chr11	65352231	65353134	65352231	FALSE	TRUE
chr11_65359292_65360328	0.943359	0.947266	0.00390625	14890.5	0.0549239	13746	399	82	0.433413	0.363098	0.363098	13749	0.623545	chr11	65359292	65360328	65359292	FALSE	TRUE
chr11_65374699_65375308	0.679199	0.798828	0.119629	18198	0.214961	17740	375	77	0.00295188	2.5299	2.5299	17682	0.0126126	chr11	65374699	65375308	65374699	FALSE	FALSE
chr11_65382824_65383857	0.00997162	0.011055	0.00108337	12708	0.0795542	14844	401	81	0.258649	0.587289	0.587289	14828	0.445086	chr11	65382824	65383857	65382824	FALSE	FALSE
chr11_65408344_65408631	0.931152	0.930664	-0.000488281	10074.5	0.023471	12116	398	82	0.738054	0.131912	0.131912	12116	0.853553	chr11	65408344	65408631	65408344	FALSE	TRUE
chr11_65409636_65410127	0.947266	0.950195	0.00292969	14485	0.00945236	11364	383	79	0.895041	0.0481571	0.0481571	11357	0.945826	chr11	65409636	65410127	65409636	FALSE	TRUE
chr11_65413778_65415203	0.483887	0.808105	0.324219	18627	0.440952	18672	409	83	2.33898e-10	9.63097	9.63097	18672	1.20063e-08	chr11	65413778	65415203	65413778	FALSE	TRUE
chr11_65419853_65420527	0.0192108	0.0200653	0.000854492	12351.5	0.0649945	14212	403	83	0.351044	0.454638	0.454638	14226	0.544918	chr11	65419853	65420527	65419853	FALSE	FALSE
chr11_65430142_65431079	0.0085144	0.00834656	-0.000167847	10597.5	0.0392678	12958	404	81	0.577069	0.238772	0.238772	12946	0.73995	chr11	65430142	65431079	65430142	FALSE	FALSE
chr11_65479349_65480024	0.00761795	0.00733566	-0.000282288	10382	0.0801725	14879	405	83	0.24947	0.602982	0.602982	14908	0.435362	chr11	65479349	65480024	65479349	FALSE	FALSE
chr11_65487660_65488348	0.0130463	0.0100403	-0.00300598	7850	-0.0735129	7224	392	82	0.293895	0.531808	-0.531808	7217	0.485189	chr11	65487660	65488348	65487660	FALSE	FALSE
chr11_65547499_65549261	0.117249	0.151855	0.0346069	17178	0.210209	17699	409	82	0.00265018	2.57672	2.57672	17700	0.0115152	chr11	65547499	65549261	65547499	FALSE	FALSE
chr11_65553749_65555573	0.102661	0.241333	0.138672	18296	0.416632	18645	410	83	2.11198e-09	8.67531	8.67531	18649	7.43799e-08	chr11	65553749	65555573	65553749	FALSE	TRUE
chr11_65601069_65601551	0.266602	0.0703125	-0.196289	1121.5	-0.241983	2695	394	82	0.000562758	3.24968	-3.24968	2673	0.00306774	chr11	65601069	65601551	65601069	FALSE	TRUE
chr11_65624495_65628596	0.0373535	0.0418396	0.00448608	15069	0.05933	13952	410	83	0.393943	0.404566	0.404566	13974	0.587186	chr11	65624495	65628596	65624495	FALSE	FALSE
chr11_65639835_65641374	0.255859	0.165161	-0.0906982	2747.5	-0.242492	2684	410	83	0.000491098	3.30883	-3.30883	2624	0.00273358	chr11	65639835	65641374	65639835	FALSE	FALSE
chr11_65655469_65656206	0.00775146	0.0103531	0.00260162	14289.5	0.0832167	15025	397	81	0.237081	0.625104	0.625104	15000	0.420718	chr11	65655469	65656206	65655469	FALSE	FALSE
chr11_65657874_65658970	0.0124969	0.0112915	-0.00120544	9167	-0.00295299	10704	408	83	0.966491	0.0148022	-0.0148022	10701	0.983071	chr11	65657874	65658970	65657874	FALSE	FALSE
chr11_65666676_65668209	0.0324097	0.0220184	-0.0103912	5914	-0.243379	2666	409	83	0.000469469	3.32839	-3.32839	2610	0.00262645	chr11	65666676	65668209	65666676	FALSE	FALSE
chr11_65685100_65685364	0.805176	0.515137	-0.290039	368	-0.393116	657	387	81	2.6007e-08	7.58491	-7.58491	680	5.892e-07	chr11	65685100	65685364	65685100	FALSE	FALSE
chr11_65686287_65687554	0.0178223	0.01828	0.000457764	11711	0.00570085	11171	410	83	0.935019	0.0291794	0.0291794	11172	0.967554	chr11	65686287	65687554	65686287	FALSE	FALSE
chr11_65769397_65770057	0.0550537	0.0561829	0.00112915	12767.5	0.019064	11877	407	83	0.784496	0.105409	0.105409	11884	0.882676	chr11	65769397	65770057	65769397	FALSE	FALSE
chr11_65779311_65779767	0.366211	0.399658	0.0334473	17145.5	0.0693739	14417	394	81	0.32539	0.487596	0.487596	14393	0.518631	chr11	65779311	65779767	65779311	FALSE	TRUE
chr11_65789909_65790168	0.0211487	0.0247498	0.00360107	14791	0.0696864	14436	406	82	0.319475	0.495563	0.495563	14429	0.511904	chr11	65789909	65790168	65789909	FALSE	FALSE
chr11_65809994_65811111	0.94873	0.90918	-0.0395508	4105.5	-0.323097	1451	385	79	6.01552e-06	5.22073	-5.22073	1511	5.99186e-05	chr11	65809994	65811111	65809994	FALSE	TRUE
chr11_65816404_65816665	0.796875	0.73877	-0.0581055	3528.5	-0.103065	6131	384	78	0.151189	0.820481	-0.820481	6201	0.305838	chr11	65816404	65816665	65816404	FALSE	TRUE
chr11_65819367_65820224	0.00467682	0.00401306	-0.000663757	9803.5	-0.0302003	9274	403	82	0.666243	0.176368	-0.176368	9276	0.803102	chr11	65819367	65820224	65819367	FALSE	FALSE
chr11_65837254_65838649	0.0317383	0.0248566	-0.00688171	6570.5	-0.0522047	8163	406	82	0.455876	0.341153	-0.341153	8162	0.64317	chr11	65837254	65838649	65837254	FALSE	FALSE
chr11_66024910_66026253	0.0150452	0.0174408	0.00239563	14123	0.114696	16123	404	83	0.0996942	1.00133	1.00133	16137	0.225861	chr11	66024910	66026253	66024910	FALSE	FALSE
chr11_66034751_66035054	0.336426	0.207397	-0.129028	2023.5	-0.143914	4801	382	81	0.0418403	1.3784	-1.3784	4840	0.11535	chr11	66034751	66035054	66034751	FALSE	FALSE
chr11_66035828_66036808	0.0175323	0.0158386	-0.00169373	8700.5	-0.0177084	9899	407	82	0.800486	0.0966462	-0.0966462	9891	0.891178	chr11	66035828	66036808	66035828	FALSE	FALSE
chr11_66045211_66045708	0.0305023	0.0349121	0.00440979	15054.5	0.0458464	13289	391	81	0.515843	0.287482	0.287482	13274	0.691276	chr11	66045211	66045708	66045211	FALSE	FALSE
chr11_66056209_66057324	0.0152359	0.0185089	0.00327301	14651.5	0.0607417	14026	409	83	0.382881	0.416936	0.416936	14047	0.576642	chr11	66056209	66057324	66056209	FALSE	FALSE
chr11_66059287_66059935	0.0322266	0.0683594	0.0361328	17229.5	0.155746	17020	402	82	0.0261795	1.58204	1.58204	17022	0.0791256	chr11	66059287	66059935	66059287	FALSE	FALSE
chr11_66061831_66063092	0.810547	0.556641	-0.253906	592	-0.549458	30	400	83	3.23005e-15	14.4908	-14.4908	26	1.97288e-12	chr11	66061831	66063092	66061831	FALSE	TRUE
chr11_66079092_66080920	0.195312	0.209106	0.0137939	16271	0.0853744	15101	395	83	0.221297	0.655024	0.655024	15114	0.400872	chr11	66079092	66080920	66079092	FALSE	FALSE
chr11_66083572_66083782	0.901855	0.874512	-0.0273438	4603	-0.0840645	6794	377	78	0.242472	0.615338	-0.615338	6865	0.42689	chr11	66083572	66083782	66083572	FALSE	TRUE
chr11_66083955_66084535	0.766113	0.797852	0.0317383	17094	0.0489322	13443	398	80	0.489843	0.309943	0.309943	13421	0.67108	chr11	66083955	66084535	66083955	FALSE	TRUE
chr11_66112251_66112803	0.0120392	0.0156555	0.00361633	14794.5	0.0719924	14552	406	83	0.301287	0.52102	0.52102	14562	0.493264	chr11	66112251	66112803	66112251	FALSE	FALSE
chr11_66114497_66115525	0.0700684	0.0615845	-0.00848389	6242	-0.0805499	6913	404	83	0.247639	0.60618	-0.60618	6895	0.433221	chr11	66114497	66115525	66114497	FALSE	FALSE
chr11_66138806_66139729	0.00957489	0.0270538	0.0174866	16510.5	0.383682	18576	407	82	4.15289e-08	7.38165	7.38165	18576	8.75237e-07	chr11	66138806	66139729	66138806	FALSE	FALSE
chr11_66176034_66176649	0.0622559	0.0533447	-0.00891113	6153	-0.2249	3007	405	83	0.0012409	2.90626	-2.90626	2954	0.00603004	chr11	66176034	66176649	66176034	FALSE	FALSE
chr11_66188130_66189397	0.358887	0.319092	-0.0397949	4096	-0.0845431	6776	410	83	0.224388	0.649	-0.649	6748	0.404244	chr11	66188130	66189397	66188130	FALSE	TRUE
chr11_66233899_66234964	0.0208435	0.0198975	-0.000946045	9482.5	-0.0377213	8887	405	83	0.588317	0.230388	-0.230388	8873	0.748368	chr11	66233899	66234964	66233899	FALSE	FALSE
chr11_6624552_6625073	0.0227051	0.0237732	0.00106812	12689.5	-0.0429747	8634	395	80	0.541976	0.26602	-0.26602	8643	0.71208	chr11	6624552	6625073	6624552	TRUE	FALSE
chr11_66247269_66248249	0.00428009	0.00566864	0.00138855	13115.5	0.124847	16379	403	83	0.073091	1.13614	1.13614	16397	0.178335	chr11	66247269	66248249	66247269	FALSE	FALSE
chr11_66313169_66313822	0.00683975	0.00615311	-0.000686646	9770.5	-0.027867	9381	409	83	0.68907	0.161737	-0.161737	9373	0.819917	chr11	66313169	66313822	66313169	FALSE	FALSE
chr11_66314207_66314455	0.363281	0.254395	-0.108887	2374	-0.219752	3112	393	80	0.00193888	2.71245	-2.71245	3138	0.00883434	chr11	66314207	66314455	66314207	FALSE	FALSE
chr11_6632879_6633787	0.00692749	0.00520325	-0.00172424	8679	-0.0856088	6735	398	83	0.219618	0.658333	-0.658333	6711	0.398485	chr11	6632879	6633787	6632879	TRUE	FALSE
chr11_66335575_66336151	0.0925903	0.0723877	-0.0202026	4988	-0.09497	6397	380	79	0.184026	0.735121	-0.735121	6459	0.352079	chr11	66335575	66336151	66335575	FALSE	TRUE
chr11_66360097_66360834	0.011261	0.0187531	0.00749207	15646.5	0.266247	18138	406	83	0.000131275	3.88182	3.88182	18145	0.000859085	chr11	66360097	66360834	66360097	FALSE	FALSE
chr11_66383571_66385047	0.0104599	0.0111618	0.000701904	12102	0.0558084	13790	405	83	0.423116	0.373541	0.373541	13807	0.615059	chr11	66383571	66385047	66383571	FALSE	FALSE
chr11_66405742_66406691	0.00576782	0.00822449	0.00245667	14206	0.0865119	15153	402	81	0.218128	0.661288	0.661288	15137	0.39682	chr11	66405742	66406691	66405742	FALSE	FALSE
chr11_66444997_66445471	0.00473785	0.00382805	-0.000909805	9524	-0.026865	9425	396	83	0.700231	0.154759	-0.154759	9422	0.827469	chr11	66444997	66445471	66444997	FALSE	FALSE
chr11_66494937_66496387	0.113281	0.136719	0.0234375	16790	0.150201	16916	405	83	0.0310407	1.50807	1.50807	16935	0.0907582	chr11	66494937	66496387	66494937	FALSE	FALSE
chr11_6650905_6652079	0.794922	0.887695	0.0927734	18013	0.254669	18067	400	83	0.000259331	3.58615	3.58615	18076	0.00156132	chr11	6650905	6652079	6650905	TRUE	TRUE
chr11_66511803_66512719	0.0131836	0.0153961	0.00221252	13991.5	0.0425157	13108	401	82	0.543923	0.264463	0.264463	13104	0.713351	chr11	66511803	66512719	66511803	FALSE	FALSE
chr11_66529656_66529896	0.96875	0.925781	-0.0429688	3973.5	-0.233826	2851	348	70	0.00179653	2.74557	-2.74557	3109	0.00826818	chr11	66529656	66529896	66529656	FALSE	FALSE
chr11_66610366_66611267	0.00742722	0.00557327	-0.00185394	8584	-0.0473935	8420	407	83	0.496152	0.304385	-0.304385	8393	0.676656	chr11	66610366	66611267	66610366	FALSE	FALSE
chr11_66623620_66626614	0.38916	0.404541	0.0153809	16381	0.107229	15895	410	83	0.123299	0.909039	0.909039	15917	0.263234	chr11	66623620	66626614	66623620	FALSE	FALSE
chr11_66725503_66726373	0.0131226	0.0133514	0.000228882	11305	-0.0277326	9390	405	82	0.692203	0.159767	-0.159767	9383	0.822343	chr11	66725503	66726373	66725503	FALSE	FALSE
chr11_6676496_6677096	0.24585	0.160156	-0.0856934	2837.5	-0.188994	3778	398	82	0.00701856	2.15375	-2.15375	3756	0.0261849	chr11	6676496	6677096	6676496	TRUE	TRUE
chr11_66790543_66791440	0.135498	0.153809	0.0183105	16554	0.0739428	14631	408	83	0.288185	0.540329	0.540329	14644	0.479234	chr11	66790543	66791440	66790543	FALSE	TRUE
chr11_66824118_66824621	0.0671997	0.485352	0.418213	18677	0.390028	18592	396	82	2.66856e-08	7.57372	7.57372	18589	6.03842e-07	chr11	66824118	66824621	66824118	FALSE	FALSE
chr11_66885275_66887330	0.111938	0.174438	0.0625	17702	0.136409	16663	410	83	0.0499313	1.30163	1.30163	16680	0.132622	chr11	66885275	66887330	66885275	FALSE	TRUE
chr11_67033675_67034660	0.0123215	0.0153961	0.00307465	14556.5	0.0755831	14687	406	83	0.277806	0.556258	0.556258	14709	0.467386	chr11	67033675	67034660	67033675	FALSE	FALSE
chr11_6704296_6704943	0.00656128	0.00754547	0.000984192	12571.5	-0.0141438	10115	388	82	0.836487	0.0775408	-0.0775408	10098	0.911142	chr11	6704296	6704943	6704296	TRUE	FALSE
chr11_67055931_67057249	0.0275269	0.0242004	-0.00332642	7716	-0.174934	4084	410	83	0.0119244	1.92356	-1.92356	4035	0.0409938	chr11	67055931	67057249	67055931	FALSE	FALSE
chr11_67070807_67071801	0.036438	0.0414124	0.00497437	15207.5	0.0490964	13447	400	83	0.481513	0.317392	0.317392	13460	0.664078	chr11	67070807	67071801	67070807	FALSE	FALSE
chr11_67084688_67085813	0.00886536	0.0115051	0.00263977	14313	0.128957	16492	408	83	0.0639322	1.19428	1.19428	16514	0.161238	chr11	67084688	67085813	67084688	FALSE	FALSE
chr11_67139887_67141146	0.0639648	0.056366	-0.00759888	6440.5	-0.0816632	6872	410	83	0.240578	0.618743	-0.618743	6850	0.424833	chr11	67139887	67141146	67139887	FALSE	FALSE
chr11_67159170_67159971	0.0113678	0.0166321	0.00526428	15266	0.137711	16685	407	83	0.0479202	1.31948	1.31948	16700	0.128262	chr11	67159170	67159971	67159170	FALSE	FALSE
chr11_67168616_67169098	0.0118103	0.0101471	-0.00166321	8727	-0.0538868	8088	406	82	0.441465	0.355104	-0.355104	8084	0.630722	chr11	67168616	67169098	67168616	FALSE	FALSE
chr11_67176945_67177169	0.694824	0.628906	-0.065918	3327	-0.299335	1802	406	83	1.71443e-05	4.76588	-4.76588	1737	0.000148094	chr11	67176945	67177169	67176945	FALSE	TRUE
chr11_67182965_67183393	0.115234	0.137451	0.0222168	16746	0.0412283	13035	410	83	0.553674	0.256746	0.256746	13053	0.72068	chr11	67182965	67183393	67182965	FALSE	FALSE
chr11_67188087_67188879	0.010376	0.0105896	0.000213623	11284.5	0.0261845	12254	401	82	0.708788	0.149483	0.149483	12255	0.83305	chr11	67188087	67188879	67188087	FALSE	FALSE
chr11_67195800_67196190	0.00457764	0.00789642	0.00331879	14671.5	0.202781	17625	388	81	0.00398147	2.39996	2.39996	17611	0.0162414	chr11	67195800	67196190	67195800	FALSE	FALSE
chr11_67232298_67232558	0.0163727	0.0202332	0.00386047	14868	0.138981	16712	373	75	0.0536942	1.27007	1.27007	16643	0.140486	chr11	67232298	67232558	67232298	FALSE	FALSE
chr11_67236264_67236953	0.00589752	0.00595474	5.72205e-05	11044	0.0275296	12337	404	82	0.694378	0.158404	0.158404	12336	0.823617	chr11	67236264	67236953	67236264	FALSE	FALSE
chr11_67250344_67250864	0.00783539	0.0101395	0.00230408	14050.5	0.0955557	15492	392	83	0.17106	0.766851	0.766851	15513	0.33489	chr11	67250344	67250864	67250344	FALSE	FALSE
chr11_67260413_67262715	0.890625	0.883789	-0.00683594	6592.5	-0.0519248	8182.5	410	83	0.455644	0.341374	-0.341374	8160	0.642945	chr11	67260413	67262715	67260413	FALSE	TRUE
chr11_67271659_67272942	0.0260925	0.0271606	0.00106812	12689.5	0.00585607	11180	404	82	0.933669	0.029807	0.029807	11180	0.967014	chr11	67271659	67272942	67271659	FALSE	FALSE
chr11_67275067_67276431	0.0147552	0.0169067	0.00215149	13941.5	0.134804	16637	408	83	0.0527858	1.27748	1.27748	16655	0.138651	chr11	67275067	67276431	67275067	FALSE	FALSE
chr11_67350928_67351953	0.0255127	0.0277863	0.00227356	14034.5	-0.0243615	9543	409	83	0.72655	0.138735	-0.138735	9531	0.845725	chr11	67350928	67351953	67350928	FALSE	TRUE
chr11_67374150_67374726	0.00672531	0.00627136	-0.000453949	10134	0.0120482	11498	401	83	0.863053	0.0639625	0.0639625	11500	0.926338	chr11	67374150	67374726	67374150	FALSE	FALSE
chr11_67396844_67398294	0.0438843	0.0398254	-0.00405884	7392.5	-0.140905	4905	410	83	0.0428483	1.36807	-1.36807	4859	0.117558	chr11	67396844	67398294	67396844	FALSE	FALSE
chr11_67478312_67479595	0.312988	0.406494	0.0935059	18019.5	0.0951422	15481	407	83	0.171796	0.764987	0.764987	15503	0.335673	chr11	67478312	67479595	67478312	FALSE	TRUE
chr11_67572486_67573851	0.00800323	0.0112839	0.00328064	14654.5	0.179533	17349	405	83	0.00980966	2.00835	2.00835	17376	0.0347436	chr11	67572486	67573851	67432665	FALSE	FALSE
chr11_67722634_67723438	0.0613098	0.0718994	0.0105896	16005.5	0.0808024	14915	409	83	0.245672	0.609645	0.609645	14935	0.430782	chr11	67722634	67723438	67283078	FALSE	FALSE
chr11_67758154_67759445	0.614746	0.578613	-0.0361328	4235	-0.0813253	6881	408	83	0.242727	0.614882	-0.614882	6869	0.427176	chr11	67758154	67759445	67247071	FALSE	TRUE
chr11_67770426_67771629	0.0480652	0.102051	0.0539856	17580	0.343819	18465	406	83	7.88866e-07	6.103	6.103	18473	1.05048e-05	chr11	67770426	67771629	67234887	FALSE	FALSE
chr11_67797802_67798413	0.00370789	0.00411606	0.000408173	11619	-0.0433498	8615	397	81	0.53848	0.26883	-0.26883	8622	0.709541	chr11	67797802	67798413	67208103	FALSE	FALSE
chr11_67806251_67806611	0.0405579	0.0211182	-0.0194397	5058	-0.240913	2720	395	81	0.000631559	3.19959	-3.19959	2712	0.00338469	chr11	67806251	67806611	67199905	FALSE	FALSE
chr11_67887977_67889768	0.0258636	0.0234222	-0.00244141	8178.5	-0.0292768	9319	407	83	0.674338	0.171122	-0.171122	9309	0.809245	chr11	67887977	67889768	67116748	FALSE	FALSE
chr11_67895786_67896104	0.271484	0.286621	0.0151367	16364	0.0200501	11931	399	83	0.774007	0.111255	0.111255	11935	0.875892	chr11	67895786	67896104	67110412	FALSE	FALSE
chr11_67980011_67982068	0.0339355	0.0286407	-0.0052948	6971.5	-0.100088	6238	410	83	0.150317	0.822993	-0.822993	6190	0.304798	chr11	67980011	67982068	67024448	FALSE	FALSE
chr11_68039300_68039880	0.00736237	0.00720978	-0.000152588	10620	0.0302882	12477	395	83	0.662961	0.178512	0.178512	12488	0.801422	chr11	68039300	68039880	66966636	FALSE	FALSE
chr11_68080365_68080931	0.00652695	0.0115204	0.00499344	15214	0.250754	18039	398	80	0.000397325	3.40085	3.40085	18017	0.00225995	chr11	68080365	68080931	66925585	FALSE	FALSE
chr11_68115317_68115726	0.96875	0.947754	-0.0209961	4948.5	-0.294307	1872	391	81	3.03205e-05	4.51826	-4.51826	1878	0.000241841	chr11	68115317	68115726	66890790	FALSE	FALSE
chr11_68153809_68154192	0.986328	0.981445	-0.00488281	7104	-0.0672055	7489	359	71	0.352046	0.453401	-0.453401	7567	0.54584	chr11	68153809	68154192	66852324	FALSE	FALSE
chr11_68227860_68228608	0.00321388	0.004879	0.00166512	13476	0.19884	17583	401	83	0.00429942	2.36659	2.36659	17595	0.0173234	chr11	68227860	68228608	66777908	FALSE	FALSE
chr11_68451359_68452846	0.318359	0.34375	0.0253906	16884	-0.0305044	9259	408	83	0.661448	0.179504	-0.179504	9239	0.80073	chr11	68451359	68452846	66553670	FALSE	TRUE
chr11_68517667_68518179	0.959961	0.952637	-0.00732422	6489	-0.0655791	7557	404	83	0.346622	0.460144	-0.460144	7533	0.540517	chr11	68517667	68518179	66488337	FALSE	FALSE
chr11_68518754_68518968	0.0106583	0.0359802	0.0253296	16880	0.383092	18574	380	80	6.0162e-08	7.22068	7.22068	18565	1.1966e-06	chr11	68518754	68518968	66487548	FALSE	FALSE
chr11_68550231_68550593	0.960449	0.950195	-0.0102539	5935.5	-0.130041	5217	390	81	0.0654025	1.18441	-1.18441	5226	0.164113	chr11	68550231	68550593	66455923	FALSE	TRUE
chr11_68606682_68607330	0.00777054	0.00985718	0.00208664	13876	0.0865796	15157	403	83	0.213988	0.66961	0.66961	15172	0.391646	chr11	68606682	68607330	66399186	FALSE	FALSE
chr11_68608155_68609419	0.0280914	0.0379333	0.00984192	15926.5	0.248682	18017	409	83	0.000351799	3.45371	3.45371	18026	0.0020331	chr11	68608155	68609419	66397097	FALSE	FALSE
chr11_68611250_68611807	0.0668945	0.508789	0.441895	18687	0.404706	18620	398	82	7.75957e-09	8.11016	8.11016	18618	2.10395e-07	chr11	68611250	68611807	66394709	FALSE	FALSE
chr11_68622722_68623252	0.31543	0.279541	-0.0358887	4240.5	-0.0471376	8438	386	82	0.502674	0.298714	-0.298714	8443	0.681089	chr11	68622722	68623252	66383264	FALSE	TRUE
chr11_68671107_68671982	0.00470352	0.0068512	0.00214767	13935	0.122988	16325	399	83	0.0773844	1.11135	1.11135	16345	0.186311	chr11	68671107	68671982	66334534	FALSE	FALSE
chr11_68772796_68773109	0.891602	0.865234	-0.0263672	4648	-0.11061	5858	393	83	0.113224	0.94606	-0.94606	5834	0.24776	chr11	68772796	68773109	66233407	FALSE	TRUE
chr11_68773284_68773712	0.939941	0.93457	-0.00537109	6943	-0.0498905	8285	389	81	0.479914	0.318837	-0.318837	8298	0.66305	chr11	68773284	68773712	66232804	FALSE	TRUE
chr11_68778569_68778851	0.131836	0.19043	0.0585938	17654.5	0.0197977	11918	393	82	0.778167	0.108927	0.108927	11916	0.878777	chr11	68778569	68778851	66227665	FALSE	TRUE
chr11_68816341_68816951	0.0178528	0.0109863	-0.00686646	6575	-0.0916974	6515	381	79	0.197217	0.705057	-0.705057	6557	0.369258	chr11	68816341	68816951	66189565	FALSE	FALSE
chr11_68849897_68850551	0.837402	0.83252	-0.00488281	7104	-0.063383	7665	388	81	0.369565	0.432309	-0.432309	7681	0.562987	chr11	68849897	68850551	66155965	FALSE	FALSE
chr11_68924690_68924957	0.616211	0.0519409	-0.564453	10	-0.506435	94	398	82	5.01273e-13	12.2999	-12.2999	89	8.53804e-11	chr11	68924690	68924957	66081559	FALSE	FALSE
chr11_69258149_69258544	0.0405273	0.0180817	-0.0224457	4883	-0.260216	2412	393	83	0.000193923	3.71237	-3.71237	2374	0.0012099	chr11	69258149	69258544	65747972	FALSE	FALSE
chr11_69285724_69286479	0.880859	0.626953	-0.253906	592	-0.481988	160	398	83	4.8178e-12	11.3172	-11.3172	145	5.07114e-10	chr11	69285724	69286479	65720037	FALSE	FALSE
chr11_69451136_69458596	0.0927734	0.127075	0.0343018	17171.5	0.155745	17019	410	83	0.0251874	1.59882	1.59882	17042	0.0766927	chr11	69451136	69458596	65547920	FALSE	TRUE
chr11_69461060_69461378	0.898438	0.898438	0	10903.5	-0.0104135	10306	398	83	0.881643	0.0547073	-0.0547073	10301	0.93759	chr11	69461060	69461378	65545138	FALSE	FALSE
chr11_6947520_6948212	0.0395508	0.0247345	-0.0148163	5431	-0.12808	5264.5	396	82	0.0678289	1.16859	-1.16859	5260	0.168647	chr11	6947520	6948212	6947520	TRUE	TRUE
chr11_694761_696375	0.0194397	0.0179596	-0.0014801	8887.5	-0.0789629	6985	408	83	0.256688	0.590594	-0.590594	6963	0.442928	chr11	694761	696375	694761	TRUE	FALSE
chr11_69489754_69490329	0.00513458	0.00553131	0.000396729	11599.5	0.0479614	13400	402	82	0.493405	0.306796	0.306796	13406	0.674186	chr11	69489754	69490329	65516187	FALSE	FALSE
chr11_69500634_69500911	0.0197754	0.0185699	-0.00120544	9167	-0.0654317	7564	388	80	0.356383	0.448083	-0.448083	7599	0.550152	chr11	69500634	69500911	65505605	FALSE	FALSE
chr11_69517840_69519929	0.197632	0.155884	-0.041748	4015.5	-0.102572	6154	407	83	0.140697	0.851716	-0.851716	6118	0.290048	chr11	69517840	69519929	65486587	FALSE	TRUE
chr11_69588826_69590546	0.423096	0.233032	-0.190063	1185	-0.351401	1088	409	83	4.41455e-07	6.35511	-6.35511	1048	6.43666e-06	chr11	69588826	69590546	65415970	FALSE	TRUE
chr11_69625108_69625473	0.839355	0.634766	-0.20459	1041	-0.460759	231	395	82	5.06425e-11	10.2955	-10.2955	223	3.47559e-09	chr11	69625108	69625473	65381043	FALSE	TRUE
chr11_69632033_69634710	0.21936	0.139404	-0.0799561	2968	-0.20767	3361	410	83	0.00283605	2.54729	-2.54729	3308	0.0122012	chr11	69632033	69634710	65371806	FALSE	TRUE
chr11_69831571_69832484	0.464355	0.263672	-0.200684	1079	-0.291674	1913	402	83	2.84518e-05	4.54589	-4.54589	1859	0.000229081	chr11	69831571	69832484	65174032	FALSE	TRUE
chr11_69924338_69925197	0.110657	0.118958	0.00830078	15752.5	0.050356	13516	401	83	0.470236	0.327684	0.327684	13528	0.655141	chr11	69924338	69925197	65081319	FALSE	TRUE
chr11_70049099_70049806	0.00468063	0.00466156	-1.90735e-05	10839	0.0460022	13297	407	83	0.508897	0.293371	0.293371	13309	0.685815	chr11	70049099	70049806	64956710	FALSE	FALSE
chr11_70116237_70117497	0.0292664	0.0298157	0.000549316	11878	0.0270422	12305	409	83	0.697834	0.156248	0.156248	12315	0.825679	chr11	70116237	70117497	64889019	FALSE	FALSE
chr11_70244288_70245001	0.0201111	0.0196838	-0.000427246	10161.5	-0.0493288	8308	403	83	0.47915	0.319528	-0.319528	8290	0.662487	chr11	70244288	70245001	64761515	FALSE	FALSE
chr11_70309696_70310121	0.913086	0.821777	-0.0913086	2732	-0.451853	274	391	83	9.88869e-11	10.0049	-10.0049	256	5.92345e-09	chr11	70309696	70310121	64696395	FALSE	TRUE
chr11_70332266_70333413	0.922852	0.783203	-0.139648	1867.5	-0.492568	125	402	82	2.01805e-12	11.6951	-11.6951	124	2.50399e-10	chr11	70332266	70333413	64673103	FALSE	FALSE
chr11_7041072_7041949	0.0533142	0.0461426	-0.00717163	6525.5	-0.0314603	9206	395	82	0.654038	0.184397	-0.184397	9205	0.796028	chr11	7041072	7041949	7041072	TRUE	FALSE
chr11_70508328_70508617	0.865234	0.126709	-0.738281	2	-0.474042	180	389	82	1.48509e-11	10.8282	-10.8282	182	1.22576e-09	chr11	70508328	70508617	64497899	FALSE	TRUE
chr11_705794_706534	0.0823975	0.18689	0.104492	18100	0.27122	18167	399	83	0.000100429	3.99814	3.99814	18172	0.000681753	chr11	705794	706534	705794	TRUE	FALSE
chr11_70672834_70673055	0.749512	0.131104	-0.618164	7	-0.360437	984	394	81	3.19646e-07	6.49533	-6.49533	996	4.89688e-06	chr11	70672834	70673055	64333461	FALSE	FALSE
chr11_70962173_70964161	0.0403137	0.0604248	0.0201111	16657.5	0.232113	17897	407	83	0.000855247	3.06791	3.06791	17910	0.00439372	chr11	70962173	70964161	64042355	FALSE	FALSE
chr11_7110132_7111376	0.882812	0.802246	-0.0805664	2956.5	-0.31818	1520	401	83	4.99607e-06	5.30137	-5.30137	1466	5.13312e-05	chr11	7110132	7111376	7110132	TRUE	TRUE
chr11_71159014_71159831	0.0567932	0.0462036	-0.0105896	5891.5	-0.0952571	6387	397	82	0.174341	0.758601	-0.758601	6375	0.339159	chr11	71159014	71159831	63846685	FALSE	FALSE
chr11_71164097_71164680	0.00698853	0.0107269	0.0037384	14831	0.135602	16648	404	83	0.0515412	1.28785	1.28785	16667	0.13607	chr11	71164097	71164680	63841836	FALSE	FALSE
chr11_712310_712515	0.954102	0.958008	0.00390625	14890.5	0.0152039	11663	381	82	0.829258	0.0813102	0.0813102	11661	0.906765	chr11	712310	712515	712310	TRUE	FALSE
chr11_71318220_71319488	0.457764	0.422607	-0.0351562	4270	-0.0431555	8625	409	83	0.535365	0.27135	-0.27135	8604	0.707276	chr11	71318220	71319488	63687028	FALSE	TRUE
chr11_71350345_71350998	0.0516357	0.0474854	-0.00415039	7355	-0.0624208	7708	409	83	0.369858	0.431966	-0.431966	7683	0.56334	chr11	71350345	71350998	63655518	FALSE	FALSE
chr11_71497571_71499065	0.00732422	0.00619888	-0.00112534	9250	0.0161328	11704	410	83	0.816845	0.0878603	0.0878603	11704	0.899149	chr11	71497571	71499065	63507451	FALSE	FALSE
chr11_71524539_71524853	0.149414	0.130615	-0.0187988	5108.5	-0.0887352	6626	409	82	0.204609	0.689076	-0.689076	6609	0.379166	chr11	71524539	71524853	63481663	FALSE	FALSE
chr11_71791385_71791960	0.00891876	0.0103836	0.00146484	13222.5	0.0189981	11871.5	399	81	0.787684	0.103648	0.103648	11859	0.883988	chr11	71791385	71791960	63214556	FALSE	FALSE
chr11_71814203_71814529	0.0104141	0.0122681	0.00185394	13662.5	0.0416883	13059	385	80	0.555637	0.255209	0.255209	13045	0.722544	chr11	71814203	71814529	63191987	FALSE	FALSE
chr11_71934247_71936321	0.0143127	0.0139236	-0.000389099	10221	-0.0388775	8835	410	83	0.576523	0.239183	-0.239183	8816	0.739794	chr11	71934247	71936321	63070195	FALSE	FALSE
chr11_71950815_71951408	0.189453	0.26709	0.0776367	17884	0.0671778	14314	396	83	0.335848	0.473857	0.473857	14326	0.529222	chr11	71950815	71951408	63055108	FALSE	FALSE
chr11_71952112_71952528	0.84375	0.795898	-0.0478516	3804.5	-0.175107	4082	370	76	0.0161637	1.79146	-1.79146	4223	0.05276	chr11	71952112	71952528	63053988	FALSE	TRUE
chr11_71954816_71955659	0.663574	0.458252	-0.205322	1032	-0.360021	989	406	83	2.33091e-07	6.63247	-6.63247	945	3.76158e-06	chr11	71954816	71955659	63050857	FALSE	TRUE
chr11_720561_721369	0.678711	0.704102	0.0253906	16884	0.00932087	11360	402	83	0.893926	0.0486983	0.0486983	11361	0.944914	chr11	720561	721369	720561	TRUE	FALSE
chr11_72145155_72145636	0.00634766	0.00804138	0.00169373	13508	0.0818519	14960	405	80	0.245947	0.609159	0.609159	14931	0.431022	chr11	72145155	72145636	62860880	FALSE	FALSE
chr11_72295167_72295875	0.662109	0.314453	-0.347656	175	-0.311776	1620	396	82	8.75644e-06	5.05767	-5.05767	1603	8.23299e-05	chr11	72295167	72295875	62710641	FALSE	TRUE
chr11_72301302_72301746	0.395264	0.194214	-0.20105	1075	-0.319816	1501	390	81	5.86211e-06	5.23195	-5.23195	1503	5.86712e-05	chr11	72301302	72301746	62704770	FALSE	FALSE
chr11_72353222_72354358	0.0421143	0.0362854	-0.00582886	6825.5	-0.128612	5252	409	83	0.0645905	1.18983	-1.18983	5219	0.162526	chr11	72353222	72354358	62652158	FALSE	FALSE
chr11_72463092_72463717	0.0137787	0.0105896	-0.00318909	7773.5	-0.0828789	6829	407	82	0.236284	0.626565	-0.626565	6819	0.419663	chr11	72463092	72463717	62542799	FALSE	FALSE
chr11_72465884_72466209	0.865234	0.861816	-0.00341797	7665.5	-0.0405414	8760	384	81	0.566484	0.246812	-0.246812	8768	0.731208	chr11	72465884	72466209	62540307	FALSE	FALSE
chr11_72492281_72492644	0.0268707	0.18335	0.156494	18364.5	0.440745	18671	397	82	3.23828e-10	9.48969	9.48969	18670	1.58001e-08	chr11	72492281	72492644	62513872	FALSE	FALSE
chr11_72504665_72505127	0.00504684	0.00437927	-0.000667572	9799.5	-0.0467429	8458	401	82	0.50461	0.297044	-0.297044	8453	0.68233	chr11	72504665	72505127	62501389	FALSE	FALSE
chr11_72525005_72526098	0.00847626	0.00852966	5.34058e-05	11037	0.0123754	11516	405	83	0.859273	0.0658688	0.0658688	11515	0.924134	chr11	72525005	72526098	62480418	FALSE	FALSE
chr11_72532612_72533774	0.107971	0.196045	0.0880737	17971	0.329179	18425	407	83	2.25862e-06	5.64616	5.64616	18431	2.59617e-05	chr11	72532612	72533774	62472742	FALSE	FALSE
chr11_725596_726870	0.587891	0.568848	-0.019043	5088.5	0.0670237	14307	405	83	0.336012	0.473645	0.473645	14325	0.529436	chr11	725596	726870	725596	TRUE	FALSE
chr11_7272757_7274235	0.268311	0.167358	-0.100952	2540	-0.168496	4237	405	83	0.0155511	1.80824	-1.80824	4201	0.051081	chr11	7272757	7274235	7272757	TRUE	TRUE
chr11_72852176_72854160	0.0262146	0.0249786	-0.00123596	9134	-0.0416667	8705.5	408	83	0.549631	0.259929	-0.259929	8683	0.718219	chr11	72852176	72854160	62152356	FALSE	FALSE
chr11_72928982_72929885	0.074585	0.235229	0.160645	18379	0.32712	18420	404	83	2.65005e-06	5.57675	5.57675	18426	2.99646e-05	chr11	72928982	72929885	62076631	FALSE	FALSE
chr11_72975469_72975797	0.318115	0.647461	0.329346	18632.5	0.116659	16161	385	81	0.098794	1.00527	1.00527	16145	0.224446	chr11	72975469	72975797	62030719	FALSE	FALSE
chr11_73018452_73020563	0.0207062	0.0165253	-0.00418091	7345	-0.0886192	6628	408	83	0.203016	0.69247	-0.69247	6600	0.377015	chr11	73018452	73020563	61985953	FALSE	FALSE
chr11_73053648_73054302	0.615234	0.750488	0.135254	18279	0.206555	17665	394	81	0.00340048	2.46846	2.46846	17657	0.0142372	chr11	73053648	73054302	61952214	FALSE	FALSE
chr11_73073118_73073733	0.896484	0.929199	0.0327148	17127.5	0.197004	17563	407	83	0.00465621	2.33197	2.33197	17577	0.0185338	chr11	73073118	73073733	61932783	FALSE	FALSE
chr11_73087229_73088294	0.0068512	0.00819397	0.00134277	13055	0.109363	15955.5	402	83	0.11659	0.933339	0.933339	15978	0.253091	chr11	73087229	73088294	61918222	FALSE	FALSE
chr11_73308799_73309500	0.0336304	0.0319519	-0.00167847	8715	-0.0650733	7581	406	81	0.355055	0.449705	-0.449705	7588	0.548961	chr11	73308799	73309500	61697016	FALSE	FALSE
chr11_73371800_73372632	0.379883	0.324707	-0.0551758	3611	-0.144832	4780	396	82	0.0389222	1.4098	-1.4098	4772	0.109038	chr11	73371800	73372632	61633884	FALSE	FALSE
chr11_734674_736521	0.908203	0.827148	-0.0810547	2941	-0.445431	304	342	80	5.46969e-10	9.26204	-9.26204	347	2.43421e-08	chr11	734674	736521	734674	TRUE	TRUE
chr11_73471275_73472483	0.0181885	0.0166168	-0.00157166	8810.5	-0.0151641	10058	406	83	0.827908	0.0820182	-0.0820182	10055	0.905747	chr11	73471275	73472483	61534033	FALSE	FALSE
chr11_73498947_73499265	0.00572968	0.00551605	-0.000213623	10507	-0.010229	10316	404	83	0.883515	0.0537862	-0.0537862	10313	0.938303	chr11	73498947	73499265	61507251	FALSE	FALSE
chr11_73693702_73694802	0.0340576	0.0440674	0.0100098	15939.5	0.125976	16405	400	82	0.0722287	1.14129	1.14129	16405	0.176622	chr11	73693702	73694802	61311714	FALSE	FALSE
chr11_73881899_73882572	0.00523376	0.00654602	0.00131226	13017	0.174496	17283	405	82	0.0126678	1.8973	1.8973	17303	0.0430829	chr11	73881899	73882572	61123944	FALSE	FALSE
chr11_74108894_74109937	0.00708008	0.00814056	0.00106049	12677.5	0.0697433	14437	407	83	0.316478	0.499657	0.499657	14454	0.509147	chr11	74108894	74109937	60896579	FALSE	FALSE
chr11_74178175_74178801	0.463135	0.382324	-0.0808105	2950	-0.0613514	7751	393	81	0.384584	0.415009	-0.415009	7759	0.578627	chr11	74178175	74178801	60827715	FALSE	TRUE
chr11_74204135_74204856	0.00304031	0.00312805	8.7738e-05	11096.5	-0.0130574	10171	396	82	0.851753	0.0696865	-0.0696865	10169	0.919292	chr11	74204135	74204856	60801660	FALSE	FALSE
chr11_74394410_74394761	0.45166	0.14856	-0.303223	317	-0.292902	1895	390	82	3.03197e-05	4.51827	-4.51827	1877	0.000241841	chr11	74394410	74394761	60611755	FALSE	FALSE
chr11_74442260_74442874	0.287109	0.209473	-0.0776367	3016.5	-0.255143	2479	407	83	0.000247204	3.60694	-3.60694	2439	0.001496	chr11	74442260	74442874	60563642	FALSE	TRUE
chr11_74459858_74460558	0.00654984	0.00694656	0.000396729	11599.5	0.00999554	11394	405	83	0.88619	0.0524732	0.0524732	11397	0.94008	chr11	74459858	74460558	60545958	FALSE	FALSE
chr11_74659931_74660373	0.00469208	0.00443649	-0.000255585	10431	-0.00515432	10577	400	81	0.941935	0.0259792	-0.0259792	10580	0.970755	chr11	74659931	74660373	60346143	FALSE	FALSE
chr11_746877_748032	0.021698	0.0211792	-0.000518799	10012.5	-0.018279	9853	408	83	0.793132	0.100655	-0.100655	9846	0.887282	chr11	746877	748032	746877	TRUE	FALSE
chr11_74699815_74700186	0.00635147	0.00745773	0.00110626	12742	0.119444	16229	394	82	0.0885451	1.05284	1.05284	16226	0.206444	chr11	74699815	74700186	60306330	FALSE	FALSE
chr11_74951647_74953491	0.0979004	0.102295	0.00439453	15036	0.0292977	12423	410	83	0.673936	0.171381	0.171381	12437	0.809009	chr11	74951647	74953491	60053025	FALSE	FALSE
chr11_75062224_75062977	0.0112	0.0110245	-0.000175476	10578.5	-0.0227238	9625	395	83	0.745005	0.127841	-0.127841	9616	0.857871	chr11	75062224	75062977	59943539	FALSE	FALSE
chr11_75139454_75139817	0.632812	0.576172	-0.0566406	3571	-0.0440308	8586	380	82	0.531843	0.274217	-0.274217	8593	0.704362	chr11	75139454	75139817	59866699	FALSE	FALSE
chr11_75140737_75141849	0.202271	0.433105	0.230835	18532	0.375398	18551	390	79	1.40984e-07	6.85083	6.85083	18538	2.46176e-06	chr11	75140737	75141849	59864667	FALSE	TRUE
chr11_75236189_75237781	0.0246887	0.0259857	0.001297	12996	0.0084663	11306	407	83	0.903527	0.044059	0.044059	11310	0.950289	chr11	75236189	75237781	59768735	FALSE	FALSE
chr11_75272950_75273616	0.0083313	0.0106354	0.00230408	14050.5	0.0938363	15426	397	83	0.178311	0.748821	0.748821	15443	0.344452	chr11	75272950	75273616	59732900	FALSE	FALSE
chr11_75294067_75294815	0.0466919	0.0459595	-0.000732422	9710.5	-0.00721066	10460	396	83	0.918032	0.0371422	-0.0371422	10457	0.958498	chr11	75294067	75294815	59711701	FALSE	FALSE
chr11_7534554_7535727	0.0291443	0.0359192	0.0067749	15534	0.101532	15705	405	83	0.144933	0.838833	0.838833	15725	0.296577	chr11	7534554	7535727	7534554	TRUE	FALSE
chr11_75378416_75379882	0.120911	0.101562	-0.0193481	5062.5	-0.0297801	9299	407	83	0.669077	0.174524	-0.174524	9291	0.805023	chr11	75378416	75379882	59626634	FALSE	FALSE
chr11_75479462_75480172	0.117859	0.0719604	-0.0458984	3875	-0.229992	2913	403	83	0.000963428	3.01618	-3.01618	2871	0.00484585	chr11	75479462	75480172	59526344	FALSE	FALSE
chr11_75525711_75525916	0.00549316	0.0045433	-0.00094986	9473.5	-0.0386533	8843	389	83	0.577001	0.238824	-0.238824	8818	0.73995	chr11	75525711	75525916	59480600	FALSE	FALSE
chr11_75526396_75526926	0.00653839	0.00723267	0.000694275	12089.5	0.123276	16333	405	82	0.0782044	1.10677	1.10677	16339	0.18789	chr11	75526396	75526926	59479590	FALSE	FALSE
chr11_75917271_75917926	0.098938	0.128418	0.02948	17031	0.191319	17503	404	82	0.00628285	2.20184	2.20184	17507	0.0238871	chr11	75917271	75917926	59088590	FALSE	FALSE
chr11_75918741_75922084	0.0556335	0.0734863	0.0178528	16534	0.168263	17207	410	83	0.0155856	1.80728	1.80728	17233	0.0511854	chr11	75918741	75922084	59084432	FALSE	FALSE
chr11_75945903_75947583	0.0171661	0.0120468	-0.00511932	7027.5	-0.19524	3641	405	83	0.00505698	2.29611	-2.29611	3590	0.0198674	chr11	75945903	75947583	59058933	FALSE	FALSE
chr11_76032911_76033392	0.708496	0.664062	-0.0444336	3930	-0.0361574	8959	393	81	0.608482	0.215752	-0.215752	8974	0.763939	chr11	76032911	76033392	58973124	FALSE	TRUE
chr11_76091524_76092638	0.026825	0.0234375	-0.00338745	7693	-0.135909	5050	410	83	0.0507756	1.29435	-1.29435	5011	0.134426	chr11	76091524	76092638	58913878	FALSE	FALSE
chr11_76155407_76156827	0.0128098	0.0170135	0.0042038	14976.5	0.0848443	15081	404	83	0.223292	0.651128	0.651128	15096	0.403043	chr11	76155407	76156827	58849689	FALSE	FALSE
chr11_76381449_76382295	0.0638428	0.0905151	0.0266724	16921	0.0694769	14425	407	83	0.31841	0.497013	0.497013	14440	0.511027	chr11	76381449	76382295	58624221	FALSE	TRUE
chr11_76494416_76495672	0.0133667	0.0116425	-0.00172424	8679	-0.105922	6032	403	83	0.128485	0.891148	-0.891148	6005	0.271091	chr11	76494416	76495672	58510844	FALSE	FALSE
chr11_76510286_76510650	0.0473938	0.0318298	-0.015564	5369.5	-0.121634	5469	386	81	0.08515	1.06982	-1.06982	5481	0.200524	chr11	76510286	76510650	58495866	FALSE	FALSE
chr11_76571963_76572291	0.00885773	0.0108185	0.00196075	13772	0.0963151	15522	393	81	0.171944	0.764614	0.764614	15499	0.335822	chr11	76571963	76572291	58434225	FALSE	FALSE
chr11_76750692_76751778	0.791016	0.653809	-0.137207	1906.5	-0.239665	2742	399	83	0.000588452	3.23029	-3.23029	2690	0.00318556	chr11	76750692	76751778	58254738	FALSE	TRUE
chr11_76757052_76757358	0.072998	0.110168	0.0371704	17258	0.181105	17372	410	83	0.00923893	2.03438	2.03438	17394	0.0330156	chr11	76757052	76757358	58249158	FALSE	FALSE
chr11_76777569_76778453	0.020752	0.0207367	-1.52588e-05	10845	-0.0351455	9017.5	410	83	0.613687	0.212053	-0.212053	9004	0.767303	chr11	76777569	76778453	58228063	FALSE	FALSE
chr11_76849067_76849565	0.859375	0.82373	-0.0356445	4249	-0.183982	3891	403	83	0.00827719	2.08212	-2.08212	3849	0.0300084	chr11	76849067	76849565	58156951	FALSE	TRUE
chr11_76858728_76859181	0.38623	0.494629	0.108398	18128	0.0121745	11506	384	80	0.864274	0.0633487	0.0633487	11489	0.926693	chr11	76858728	76859181	58147335	FALSE	FALSE
chr11_7694711_7695685	0.210205	0.600098	0.389893	18667	0.526015	18725	405	83	4.23754e-14	13.3729	13.3729	18726	1.26023e-11	chr11	7694711	7695685	7694711	TRUE	TRUE
chr11_77184193_77185504	0.0176392	0.0216064	0.00396729	14917	0.115051	16130	406	83	0.0984795	1.00665	1.00665	16149	0.223867	chr11	77184193	77185504	57821012	FALSE	FALSE
chr11_77300360_77301391	0.00971222	0.0203247	0.0106125	16007	0.358694	18514	402	82	3.03024e-07	6.51852	6.51852	18511	4.68438e-06	chr11	77300360	77301391	57705125	FALSE	FALSE
chr11_77531186_77532262	0.017746	0.0174713	-0.000274658	10396.5	-0.0492935	8313	405	83	0.479276	0.319414	-0.319414	8291	0.662563	chr11	77531186	77532262	57474254	FALSE	FALSE
chr11_776803_777998	0.0116348	0.0130234	0.00138855	13115.5	0.0234717	12117	405	83	0.736383	0.132896	0.132896	12125	0.852314	chr11	776803	777998	776803	TRUE	FALSE
chr11_77705600_77706035	0.0448608	0.0438232	-0.0010376	9341.5	-0.0427381	8644	402	83	0.53983	0.267743	-0.267743	8630	0.710489	chr11	77705600	77706035	57300481	FALSE	FALSE
chr11_77790478_77791101	0.0251007	0.0190735	-0.00602722	6762	-0.14512	4772	400	83	0.0373296	1.42795	-1.42795	4737	0.105555	chr11	77790478	77791101	57215415	FALSE	FALSE
chr11_77850482_77850845	0.00346756	0.00213623	-0.00133133	9039	-0.101376	6196	390	82	0.146616	0.833819	-0.833819	6162	0.298944	chr11	77850482	77850845	57155671	FALSE	FALSE
chr11_77899564_77899990	0.0056076	0.00598145	0.00037384	11558.5	0.034057	12683	404	83	0.625073	0.204069	0.204069	12700	0.775742	chr11	77899564	77899990	57106526	FALSE	FALSE
chr11_77907211_77908088	0.94043	0.935547	-0.00488281	7104	-0.0108257	10288	398	81	0.878217	0.0563982	-0.0563982	10291	0.935205	chr11	77907211	77908088	57098428	FALSE	FALSE
chr11_78127965_78129400	0.0147095	0.0141525	-0.000556946	9951.5	-0.0193716	9792	408	83	0.781057	0.107317	-0.107317	9781	0.880605	chr11	78127965	78129400	56877116	FALSE	FALSE
chr11_78614205_78614597	0.891602	0.796387	-0.0952148	2646.5	-0.289364	1947	389	80	4.54519e-05	4.34245	-4.34245	1982	0.000343382	chr11	78614205	78614597	56391919	FALSE	TRUE
chr11_789871_790133	0.204102	0.165283	-0.0388184	4131.5	-0.117019	5626	390	80	0.0991068	1.0039	-1.0039	5661	0.224877	chr11	789871	790133	789871	TRUE	FALSE
chr11_79148358_79152200	0.0802002	0.0547485	-0.0254517	4692.5	-0.224096	3023	410	83	0.00127693	2.89383	-2.89383	2964	0.00618684	chr11	79148358	79152200	55854316	FALSE	TRUE
chr11_791953_792400	0.942871	0.93457	-0.00830078	6283	-0.0268686	9424	388	80	0.705224	0.151673	-0.151673	9438	0.830787	chr11	791953	792400	791953	TRUE	FALSE
chr11_797640_798544	0.0250854	0.0292358	0.00415039	14961	0.125125	16383	410	83	0.0721241	1.14192	1.14192	16407	0.176482	chr11	797640	798544	797640	TRUE	FALSE
chr11_8040409_8041558	0.13208	0.115417	-0.0166626	5272.5	-0.114577	5716	406	83	0.0999055	1.00041	-1.00041	5675	0.226178	chr11	8040409	8041558	8040409	TRUE	TRUE
chr11_804827_805608	0.01474	0.0192566	0.0045166	15076	0.178516	17341	404	83	0.0103879	1.98347	1.98347	17364	0.0365087	chr11	804827	805608	804827	TRUE	FALSE
chr11_809202_810509	0.0200195	0.0187073	-0.00131226	9057	-0.0524243	8150	410	83	0.45132	0.345515	-0.345515	8136	0.639187	chr11	809202	810509	809202	TRUE	FALSE
chr11_8102358_8102913	0.108582	0.0910645	-0.0175171	5202	-0.151476	4614	407	83	0.0295719	1.52912	-1.52912	4563	0.0873496	chr11	8102358	8102913	8102358	TRUE	FALSE
chr11_818974_820271	0.0321045	0.0345459	0.00244141	14173	0.0824929	14987	405	83	0.236323	0.626495	0.626495	15006	0.419691	chr11	818974	820271	818974	TRUE	FALSE
chr11_823556_824878	0.880859	0.90625	0.0253906	16884	0.192564	17518	407	83	0.00567325	2.24617	2.24617	17541	0.0219208	chr11	823556	824878	823556	TRUE	FALSE
chr11_82443435_82444976	0.146484	0.150635	0.00415039	14961	-0.0463324	8479	408	83	0.505822	0.296003	-0.296003	8458	0.683098	chr11	82443435	82444976	52561540	FALSE	TRUE
chr11_82612259_82612844	0.00531387	0.00769806	0.00238419	14112	0.116967	16171	401	83	0.0932627	1.03029	1.03029	16185	0.214717	chr11	82612259	82612844	52393672	FALSE	FALSE
chr11_826941_827625	0.0263062	0.259521	0.233154	18534	0.512909	18719	406	83	1.74512e-13	12.7582	12.7582	18720	3.79957e-11	chr11	826941	827625	826941	TRUE	FALSE
chr11_8284102_8285032	0.0742798	0.0758057	0.00152588	13314	-0.0726755	7261	394	82	0.300398	0.522304	-0.522304	7256	0.492712	chr11	8284102	8285032	8284102	TRUE	TRUE
chr11_82867960_82868560	0.00299644	0.00361633	0.000619888	11983	0.0609725	14036	392	81	0.384109	0.415545	0.415545	14045	0.578093	chr11	82867960	82868560	52137956	FALSE	FALSE
chr11_8289532_8290322	0.105835	0.10144	-0.00439453	7271.5	-0.0791124	6980	392	83	0.257423	0.589353	-0.589353	6969	0.443705	chr11	8289532	8290322	8289532	TRUE	TRUE
chr11_82904478_82905660	0.00620651	0.00830078	0.00209427	13884	0.0428055	13126	398	82	0.541129	0.266699	0.266699	13123	0.71138	chr11	82904478	82905660	52100856	FALSE	FALSE
chr11_829284_833558	0.188354	0.198853	0.010498	15996.5	0.0214517	12001	410	83	0.758113	0.120266	0.120266	12008	0.865326	chr11	829284	833558	829284	TRUE	FALSE
chr11_82996642_82997536	0.0059967	0.00467682	-0.00131989	9045.5	-0.0555088	8003	406	82	0.427694	0.368867	-0.368867	7994	0.618881	chr11	82996642	82997536	52008980	FALSE	FALSE
chr11_842293_843396	0.0118637	0.00971985	-0.00214386	8348.5	-0.0433137	8617	406	82	0.53617	0.270697	-0.270697	8608	0.707891	chr11	842293	843396	842293	TRUE	FALSE
chr11_849087_850982	0.64502	0.865723	0.220703	18518.5	0.351926	18496	405	83	4.33882e-07	6.36263	6.36263	18500	6.35591e-06	chr11	849087	850982	849087	TRUE	TRUE
chr11_85358865_85359226	0.00356865	0.0044632	0.000894547	12421	0.0814048	14939	391	82	0.24323	0.613983	0.613983	14957	0.427862	chr11	85358865	85359226	49647290	FALSE	FALSE
chr11_85374872_85376234	0.0133743	0.0124588	-0.000915527	9518.5	-0.0398562	8788	409	83	0.567032	0.246392	-0.246392	8773	0.731574	chr11	85374872	85376234	49630282	FALSE	FALSE
chr11_85521991_85522285	0.014389	0.0131378	-0.00125122	9120.5	-0.0171955	9931	385	79	0.80974	0.0916544	-0.0916544	9952	0.895483	chr11	85521991	85522285	49484231	FALSE	FALSE
chr11_85779725_85780397	0.0122833	0.0121078	-0.000175476	10578.5	-0.0355737	8994	401	83	0.610055	0.214631	-0.214631	8978	0.76506	chr11	85779725	85780397	49226119	FALSE	FALSE
chr11_858575_858932	0.865723	0.87207	0.00634766	15461.5	0.0648148	14207	392	81	0.358418	0.445611	0.445611	14182	0.551883	chr11	858575	858932	858575	TRUE	FALSE
chr11_85955808_85956517	0.00703049	0.00751877	0.000488281	11778.5	0.0168855	11749	401	83	0.808313	0.0924204	0.0924204	11754	0.894824	chr11	85955808	85956517	49049999	FALSE	FALSE
chr11_8615397_8615889	0.0680542	0.0828857	0.0148315	16347.5	0.0616751	14072	394	80	0.384378	0.415242	0.415242	14044	0.578427	chr11	8615397	8615889	8615397	TRUE	FALSE
chr11_86382695_86383586	0.0328369	0.128174	0.0953369	18037	0.280022	18215	393	82	6.59736e-05	4.18063	4.18063	18211	0.000473769	chr11	86382695	86383586	48622930	FALSE	FALSE
chr11_86511184_86511889	0.0218658	0.0213318	-0.000534058	9989	-0.0230673	9605	401	80	0.744789	0.127967	-0.127967	9614	0.85779	chr11	86511184	86511889	48494627	FALSE	FALSE
chr11_86665901_86666567	0.0116959	0.0119781	0.000282288	11400	-0.0445107	8568	397	82	0.525758	0.279214	-0.279214	8562	0.699881	chr11	86665901	86666567	48339949	FALSE	FALSE
chr11_86748660_86749093	0.0170135	0.0149994	-0.00201416	8440	0.0502439	13511	400	82	0.473384	0.324786	0.324786	13514	0.658044	chr11	86748660	86749093	48257423	FALSE	FALSE
chr11_8703783_8704616	0.0174713	0.016922	-0.000549316	9966.5	0.0120108	11493	397	82	0.864251	0.0633601	0.0633601	11490	0.926693	chr11	8703783	8704616	8703783	TRUE	FALSE
chr11_87908243_87908614	0.0661011	0.0252838	-0.0408325	4054	-0.207147	3380	389	81	0.00332791	2.47783	-2.47783	3381	0.0139894	chr11	87908243	87908614	47097902	FALSE	TRUE
chr11_88070501_88071042	0.00171185	0	-0.00171185	8685	-0.171426	4163	387	79	0.0130086	1.88577	-1.88577	4088	0.0440261	chr11	88070501	88071042	46935474	FALSE	FALSE
chr11_88241710_88242562	0.672852	0.748535	0.0756836	17872	0.0520781	13601	392	82	0.458339	0.338814	0.338814	13602	0.645574	chr11	88241710	88242562	46763954	FALSE	TRUE
chr11_888684_888981	0.896484	0.871582	-0.0249023	4726	-0.157347	4461	388	79	0.0274401	1.56161	-1.56161	4511	0.0822193	chr11	888684	888981	888684	TRUE	FALSE
chr11_8892072_8892794	0.0117035	0.0108643	-0.000839233	9595.5	-0.0701594	7363	396	83	0.314356	0.502579	-0.502579	7348	0.507038	chr11	8892072	8892794	8892072	TRUE	FALSE
chr11_89224416_89224718	0.520996	0.154541	-0.366455	121.5	-0.318713	1514	387	79	7.95885e-06	5.09915	-5.09915	1579	7.60413e-05	chr11	89224416	89224718	45781798	FALSE	TRUE
chr11_8932573_8933294	0.0245667	0.0216217	-0.00294495	7883	-0.131834	5166	398	83	0.0587667	1.23087	-1.23087	5145	0.150829	chr11	8932573	8933294	8932573	TRUE	FALSE
chr11_89519060_89519482	0.623047	0.385742	-0.237305	726.5	-0.34661	1153	398	81	8.67357e-07	6.0618	-6.0618	1160	1.13961e-05	chr11	89519060	89519482	45487034	FALSE	TRUE
chr11_89520089_89521109	0.561523	0.330322	-0.231201	782.5	-0.414454	497	406	82	3.16643e-09	8.49943	-8.49943	482	1.0292e-07	chr11	89520089	89521109	45485407	FALSE	TRUE
chr11_89597044_89597775	0.506836	0.296875	-0.209961	981.5	-0.359816	992	404	82	2.75149e-07	6.56043	-6.56043	974	4.31757e-06	chr11	89597044	89597775	45408741	FALSE	TRUE
chr11_89713070_89713801	0.490723	0.291016	-0.199707	1090.5	-0.389911	687	403	82	2.56981e-08	7.5901	-7.5901	676	5.8503e-07	chr11	89713070	89713801	45292715	FALSE	TRUE
chr11_89784903_89785927	0.65918	0.38916	-0.27002	481.5	-0.389163	694	406	82	2.6781e-08	7.57217	-7.57217	681	6.05269e-07	chr11	89784903	89785927	45220589	FALSE	TRUE
chr11_8985452_8986507	0.00790405	0.0100098	0.00210571	13894.5	0.138886	16711	404	82	0.0472732	1.32539	1.32539	16714	0.127045	chr11	8985452	8986507	8985452	TRUE	FALSE
chr11_89955742_89956358	0.0370483	0.034729	-0.00231934	8260	-0.033095	9112	404	81	0.638397	0.194909	-0.194909	9125	0.78541	chr11	89955742	89956358	45050158	FALSE	FALSE
chr11_9025095_9026315	0.208374	0.28125	0.072876	17844	0.134627	16634	399	81	0.0560105	1.25173	1.25173	16611	0.145268	chr11	9025095	9026315	9025095	TRUE	FALSE
chr11_910677_911581	0.0322876	0.0292358	-0.00305176	7829.5	-0.0891089	6612	404	83	0.200908	0.697002	-0.697002	6584	0.374214	chr11	910677	911581	910677	TRUE	FALSE
chr11_9112461_9113459	0.25	0.208252	-0.041748	4015.5	-0.108282	5958	397	82	0.122555	0.911668	-0.911668	5948	0.262038	chr11	9112461	9113459	9112461	TRUE	TRUE
chr11_91957635_91960290	0.176514	0.0626221	-0.113892	2277.5	-0.285131	2010	410	83	4.15788e-05	4.38113	-4.38113	1956	0.000318227	chr11	91957635	91960290	43046226	FALSE	TRUE
chr11_925183_926083	0.0523071	0.0467224	-0.00558472	6876.5	-0.067858	7459	404	82	0.332528	0.478172	-0.478172	7457	0.526203	chr11	925183	926083	925183	TRUE	FALSE
chr11_92615835_92616668	0.842773	0.74707	-0.0957031	2641.5	-0.25881	2435	393	80	0.000261808	3.58202	-3.58202	2453	0.00157471	chr11	92615835	92616668	42389848	FALSE	TRUE
chr11_92702789_92703434	0.703613	0.555664	-0.147949	1729.5	-0.152026	4598	399	82	0.0300813	1.5217	-1.5217	4583	0.0884637	chr11	92702789	92703434	42303082	FALSE	TRUE
chr11_9286273_9287091	0.0110397	0.00746918	-0.00357056	7591	-0.172013	4150	397	83	0.0136502	1.86486	-1.86486	4117	0.0458417	chr11	9286273	9287091	9286273	TRUE	FALSE
chr11_92930760_92931391	0.0165863	0.0153275	-0.00125885	9113	-0.108373	5950	396	83	0.120377	0.919457	-0.919457	5916	0.258901	chr11	92930760	92931391	42075125	FALSE	FALSE
chr11_93275814_93276721	0.0199127	0.020813	0.000900269	12424.5	0.104949	15828	408	83	0.131629	0.880647	0.880647	15842	0.276295	chr11	93275814	93276721	41729795	FALSE	FALSE
chr11_9335730_9336477	0.00368881	0.00508118	0.00139236	13119.5	0.0687084	14390	399	82	0.325071	0.488022	0.488022	14396	0.518255	chr11	9335730	9336477	9335730	TRUE	FALSE
chr11_93394678_93395273	0.00476074	0.00414658	-0.000614166	9870	-0.0255947	9492	405	82	0.714608	0.145932	-0.145932	9485	0.836911	chr11	93394678	93395273	41611243	FALSE	FALSE
chr11_93474085_93475075	0.00384521	0.0046463	0.000801086	12267.5	0.0236479	12122	403	83	0.734374	0.134083	0.134083	12134	0.850753	chr11	93474085	93475075	41531441	FALSE	FALSE
chr11_93517309_93518130	0.00801086	0.00965881	0.00164795	13452.5	0.0823884	14986	408	83	0.236588	0.626008	0.626008	15004	0.420003	chr11	93517309	93518130	41488386	FALSE	FALSE
chr11_93583374_93583717	0.0759277	0.222168	0.14624	18325.5	0.254878	18068	400	82	0.000275252	3.56027	3.56027	18066	0.00164344	chr11	93583374	93583717	41422799	FALSE	FALSE
chr11_9385837_9386241	0.00604248	0.00400543	-0.00203705	8423.5	-0.0744406	7181	392	83	0.284987	0.545175	-0.545175	7159	0.4753	chr11	9385837	9386241	9385837	TRUE	FALSE
chr11_93861560_93862773	0.0133057	0.0144577	0.00115204	12791.5	0.0129681	11537	406	83	0.852564	0.0692731	0.0692731	11543	0.919832	chr11	93861560	93862773	41143743	FALSE	FALSE
chr11_9406108_9406702	0.0379944	0.0386658	0.000671387	12060.5	0.0683031	14373	402	83	0.327162	0.485237	0.485237	14388	0.52066	chr11	9406108	9406702	9406108	TRUE	FALSE
chr11_94134226_94134848	0.286621	0.162109	-0.124512	2111.5	-0.105482	6043	400	83	0.130347	0.8849	-0.8849	6019	0.274278	chr11	94134226	94134848	40871668	FALSE	FALSE
chr11_94276894_94278913	0.188721	0.281494	0.0927734	18013	0.298995	18292	409	83	1.73165e-05	4.76154	4.76154	18302	0.0001491	chr11	94276894	94278913	40727603	FALSE	TRUE
chr11_943737_944142	0.85791	0.850586	-0.00732422	6489	-0.111023	5841	385	82	0.114329	0.941844	-0.941844	5843	0.249617	chr11	943737	944142	943737	TRUE	FALSE
chr11_94473535_94474338	0.125854	0.0525513	-0.0733032	3121	-0.290745	1929	402	83	3.01689e-05	4.52044	-4.52044	1876	0.00024094	chr11	94473535	94474338	40532178	FALSE	TRUE
chr11_94501366_94502696	0.02742	0.0149155	-0.0125046	5673	-0.292612	1901	408	83	2.61873e-05	4.58191	-4.58191	1838	0.000213324	chr11	94501366	94502696	40503820	FALSE	TRUE
chr11_94770606_94771404	0.856445	0.821289	-0.0351562	4270	-0.164738	4304	407	83	0.0179657	1.74556	-1.74556	4273	0.0576972	chr11	94770606	94771404	40235112	FALSE	TRUE
chr11_94800243_94801117	0.0858765	0.088562	0.00268555	14337.5	0.124228	16362	402	83	0.0746792	1.1268	1.1268	16383	0.181548	chr11	94800243	94801117	40205399	FALSE	FALSE
chr11_9482109_9483152	0.00528717	0.00652313	0.00123596	12919.5	0.058464	13924	403	82	0.402859	0.394847	0.394847	13933	0.596206	chr11	9482109	9483152	9482109	TRUE	FALSE
chr11_94822597_94823611	0.0123444	0.0108337	-0.00151062	8861.5	-0.0596474	7815	404	82	0.394381	0.404084	-0.404084	7809	0.587698	chr11	94822597	94823611	40182905	FALSE	FALSE
chr11_94883647_94884811	0.128906	0.0473938	-0.081543	2924.5	-0.129622	5226	406	83	0.0626836	1.20285	-1.20285	5195	0.158687	chr11	94883647	94884811	40121705	FALSE	TRUE
chr11_94963753_94964573	0.008255	0.0089798	0.000724792	12139.5	-0.000899119	10807	402	83	0.990045	0.00434504	-0.00434504	10807	0.995015	chr11	94963753	94964573	40041943	FALSE	FALSE
chr11_95522460_95524043	0.00592041	0.005867	-5.34058e-05	10783.5	-0.0305784	9251	404	82	0.662496	0.178817	-0.178817	9248	0.801084	chr11	95522460	95524043	39482473	FALSE	FALSE
chr11_95656912_95657365	0.00650024	0.00606918	-0.000431061	10153	-0.00527483	10571	402	83	0.93995	0.0268951	-0.0268951	10568	0.970138	chr11	95656912	95657365	39349151	FALSE	FALSE
chr11_9594346_9596536	0.010437	0.0126801	0.00224304	14013.5	0.0802233	14882	410	83	0.248974	0.603846	0.603846	14912	0.434823	chr11	9594346	9596536	9594346	TRUE	FALSE
chr11_96122536_96123587	0.0091629	0.0102386	0.00107574	12699.5	0.0938227	15425	409	83	0.177635	0.750471	0.750471	15453	0.343609	chr11	96122536	96123587	38882929	FALSE	FALSE
chr11_9634969_9636065	0.0156403	0.0174103	0.00177002	13581.5	0.00196341	10958	405	83	0.977846	0.00972941	0.00972941	10960	0.988939	chr11	9634969	9636065	9634969	TRUE	FALSE
chr11_9685520_9686050	0.0106735	0.0101013	-0.000572205	9932	-0.016149	9994	379	83	0.816035	0.0882913	-0.0882913	9985	0.898943	chr11	9685520	9686050	9685520	TRUE	FALSE
chr11_9779592_9780470	0.0300903	0.0206299	-0.00946045	6055.5	-0.170232	4189	388	80	0.0164374	1.78417	-1.78417	4234	0.0534859	chr11	9779592	9780470	9779592	TRUE	FALSE
chr12_100535916_100536620	0.0055542	0.00669098	0.00113678	12777.5	0.0564171	13816	397	83	0.417638	0.3792	0.3792	13833	0.609555	chr12	100535916	100536620	33315275	FALSE	FALSE
chr12_100593253_100593814	0.0332031	0.0410767	0.00787354	15699	0.106774	15878	382	80	0.131236	0.881947	0.881947	15847	0.275716	chr12	100593253	100593814	33258081	FALSE	FALSE
chr12_100660748_100661646	0.026825	0.0233307	-0.00349426	7623	-0.147495	4707	409	83	0.0340503	1.46788	-1.46788	4662	0.0980514	chr12	100660748	100661646	33190249	FALSE	FALSE
chr12_100967293_100967845	0.00713348	0.00677872	-0.000354767	10274.5	-0.0106788	10294	348	74	0.881975	0.054544	-0.054544	10305	0.937677	chr12	100967293	100967845	32884050	FALSE	FALSE
chr12_101109863_101111622	0.391113	0.321045	-0.0700684	3223	-0.132827	5133	406	83	0.0564616	1.24825	-1.24825	5103	0.146255	chr12	101109863	101111622	32740273	FALSE	TRUE
chr12_101801047_101802153	0.00778961	0.00678253	-0.00100708	9373.5	-0.0695851	7396	401	83	0.318196	0.497305	-0.497305	7375	0.510815	chr12	101801047	101802153	32049742	FALSE	FALSE
chr12_102091044_102092366	0.0108795	0.0137177	0.00283813	14423	0.0677192	14344	406	83	0.330885	0.480323	0.480323	14364	0.524489	chr12	102091044	102092366	31759529	FALSE	FALSE
chr12_102224262_102224614	0.00313568	0.00336838	0.000232697	11311	0.0133052	11564	386	81	0.845896	0.0726829	0.0726829	11582	0.916294	chr12	102224262	102224614	31627281	FALSE	FALSE
chr12_102270754_102271801	0.0301971	0.0202942	-0.00990295	5978	-0.212981	3244	403	83	0.00223688	2.65036	-2.65036	3194	0.00998811	chr12	102270754	102271801	31580094	FALSE	FALSE
chr12_102455420_102455983	0.00668335	0.00684738	0.000164032	11207	0.0313029	12536	394	81	0.656342	0.18287	0.18287	12533	0.797537	chr12	102455420	102455983	31395912	FALSE	FALSE
chr12_102513668_102514076	0.0033226	0.00468826	0.00136566	13092	0.10284	15754	395	82	0.140904	0.851077	0.851077	15764	0.290363	chr12	102513668	102514076	31337819	FALSE	FALSE
chr12_103351579_103352695	0.259521	0.173706	-0.0858154	2834	-0.0879938	6647	402	83	0.206802	0.684446	-0.684446	6625	0.382152	chr12	103351579	103352695	30499200	FALSE	TRUE
chr12_103696090_103696418	0.738281	0.680664	-0.0576172	3541.5	-0.100878	6215	374	81	0.154524	0.811005	-0.811005	6226	0.310606	chr12	103696090	103696418	30155477	FALSE	TRUE
chr12_103889148_103889843	0.140503	0.0585327	-0.0819702	2912.5	-0.207437	3369	405	83	0.00289665	2.5381	-2.5381	3321	0.0124078	chr12	103889148	103889843	29962052	FALSE	TRUE
chr12_104234273_104235327	0.0139008	0.0138321	-6.86646e-05	10754	-0.0445724	8564	406	83	0.522284	0.282094	-0.282094	8543	0.697271	chr12	104234273	104235327	29616568	FALSE	FALSE
chr12_104323017_104324811	0.0178528	0.016861	-0.000991821	9391.5	0.0441668	13209	407	83	0.525841	0.279146	0.279146	13224	0.699881	chr12	104323017	104324811	29527084	FALSE	FALSE
chr12_104359406_104360023	0.00701141	0.00640869	-0.000602722	9887.5	0.00530723	11150	384	79	0.940819	0.026494	0.026494	11146	0.970407	chr12	104359406	104360023	29491872	FALSE	FALSE
chr12_104457766_104459087	0.00925446	0.00922394	-3.05176e-05	10820.5	-0.0042156	10628	405	82	0.952307	0.0212232	-0.0212232	10627	0.975955	chr12	104457766	104459087	29392808	FALSE	FALSE
chr12_104531174_104532539	0.0290222	0.0287018	-0.000320435	10322.5	0.014742	11646	407	81	0.834273	0.0786917	0.0786917	11645	0.909962	chr12	104531174	104532539	29319356	FALSE	FALSE
chr12_104609397_104610172	0.45874	0.652832	0.194092	18465.5	0.153804	16984	397	83	0.0274909	1.56081	1.56081	16994	0.0823452	chr12	104609397	104610172	29241723	FALSE	TRUE
chr12_104659057_104659583	0.930664	0.922852	-0.0078125	6378	-0.0390252	8825	385	81	0.580978	0.23584	-0.23584	8839	0.742764	chr12	104659057	104659583	29192312	FALSE	TRUE
chr12_104680737_104681096	0.00245094	0.00198364	-0.0004673	10116	-0.0250862	9513	403	82	0.718238	0.143732	-0.143732	9502	0.839535	chr12	104680737	104681096	29170799	FALSE	FALSE
chr12_104697348_104697984	0.882812	0.913574	0.0307617	17068	0.125733	16398	396	81	0.0745004	1.12784	1.12784	16387	0.181319	chr12	104697348	104697984	29153911	FALSE	FALSE
chr12_104850253_104852395	0.0467834	0.0271759	-0.0196075	5037	-0.316221	1556	410	83	5.48132e-06	5.26111	-5.26111	1486	5.54525e-05	chr12	104850253	104852395	28999500	FALSE	TRUE
chr12_105351573_105352055	0.0126495	0.0175781	0.00492859	15197.5	0.134922	16639	408	83	0.052557	1.27937	1.27937	16658	0.138185	chr12	105351573	105352055	28499840	FALSE	FALSE
chr12_105379976_105380445	0.00437546	0.00520325	0.000827789	12308.5	0.045724	13287	395	82	0.510523	0.291985	0.291985	13300	0.687053	chr12	105379976	105380445	28471450	FALSE	FALSE
chr12_105478089_105478517	0.0887451	0.151733	0.0629883	17714.5	0.209134	17685	399	81	0.00298898	2.52448	2.52448	17680	0.0127537	chr12	105478089	105478517	28373378	FALSE	FALSE
chr12_105501333_105501908	0.00428772	0.00324631	-0.00104141	9331.5	-0.0602795	7790	389	78	0.3942	0.404284	-0.404284	7808	0.587474	chr12	105501333	105501908	28349987	FALSE	FALSE
chr12_105629690_105630099	0.00540924	0.00511932	-0.000289917	10366.5	0.0443293	13219	400	82	0.526286	0.278778	0.278778	13221	0.700159	chr12	105629690	105630099	28221796	FALSE	FALSE
chr12_105724272_105725052	0.013237	0.0122757	-0.000961304	9462	-0.100985	6212	406	82	0.149044	0.826687	-0.826687	6177	0.302839	chr12	105724272	105725052	28126843	FALSE	FALSE
chr12_1058481_1059430	0.191528	0.145996	-0.0455322	3883	-0.141787	4881	407	82	0.042729	1.36928	-1.36928	4853	0.117386	chr12	1058481	1059430	1058481	TRUE	FALSE
chr12_106532106_106533696	0.041626	0.0330505	-0.00857544	6232.5	0.0260946	12247	410	83	0.707876	0.150043	0.150043	12260	0.832521	chr12	106532106	106533696	27318199	FALSE	FALSE
chr12_106640880_106642374	0.0394287	0.0361938	-0.00323486	7750.5	-0.0905529	6560	409	83	0.193236	0.713913	-0.713913	6525	0.364232	chr12	106640880	106642374	27209521	FALSE	FALSE
chr12_106696232_106697199	0.00630951	0.00673676	0.000427246	11660	0.0224282	12062	404	82	0.748788	0.125641	0.125641	12066	0.860482	chr12	106696232	106697199	27154696	FALSE	FALSE
chr12_106751416_106751965	0.0055809	0.00561523	3.43323e-05	10996	-0.016903	9951	407	83	0.808419	0.0923637	-0.0923637	9943	0.894824	chr12	106751416	106751965	27099930	FALSE	FALSE
chr12_106975195_106975714	0.134521	0.0596924	-0.0748291	3082	-0.268164	2286	396	83	0.000121494	3.91545	-3.91545	2243	0.000804632	chr12	106975195	106975714	26876181	FALSE	TRUE
chr12_106977388_106977713	0.189941	0.055481	-0.134521	1937	-0.244689	2648	386	80	0.000569114	3.2448	-3.2448	2678	0.00309519	chr12	106977388	106977713	26874182	FALSE	TRUE
chr12_106979429_106981086	0.400391	0.212646	-0.187744	1216.5	-0.260057	2415	407	83	0.000187165	3.72777	-3.72777	2365	0.00117164	chr12	106979429	106981086	26870809	FALSE	TRUE
chr12_107167762_107168747	0.00463104	0.00605011	0.00141907	13153.5	0.0624695	14102	400	82	0.372229	0.429189	0.429189	14113	0.565895	chr12	107167762	107168747	26683148	FALSE	FALSE
chr12_107349152_107350089	0.0795288	0.0739136	-0.00561523	6870.5	-0.157945	4446	402	83	0.0234312	1.63021	-1.63021	4414	0.0721576	chr12	107349152	107350089	26501806	FALSE	FALSE
chr12_107486612_107487811	0.0108643	0.0126495	0.00178528	13596	0.109674	15964	408	83	0.115117	0.938859	0.938859	15993	0.250834	chr12	107486612	107487811	26364084	FALSE	FALSE
chr12_10765955_10766331	0.012352	0.0132904	0.000938416	12483	0.0291544	12417	407	82	0.677139	0.169322	0.169322	12417	0.811077	chr12	10765955	10766331	10765955	FALSE	FALSE
chr12_107711603_107714107	0.0454102	0.0480957	0.00268555	14337.5	-0.0574652	7910	408	83	0.409183	0.388083	-0.388083	7891	0.602046	chr12	107711603	107714107	26137788	FALSE	FALSE
chr12_107974842_107975305	0.508789	0.309814	-0.198975	1095	-0.199359	3550	395	83	0.00428632	2.36792	-2.36792	3506	0.0172818	chr12	107974842	107975305	25876590	FALSE	TRUE
chr12_108154394_108155137	0.00440598	0.00596237	0.0015564	13350.5	-0.00743074	10442	394	83	0.915077	0.0385426	-0.0385426	10438	0.95744	chr12	108154394	108155137	25696758	FALSE	FALSE
chr12_108168986_108169570	0.71875	0.447998	-0.270752	475.5	-0.352805	1073	389	83	4.45846e-07	6.35082	-6.35082	1051	6.48553e-06	chr12	108168986	108169570	25682325	FALSE	TRUE
chr12_108237437_108238721	0.5	0.326416	-0.173584	1371.5	-0.17002	4196	403	83	0.0146822	1.83321	-1.83321	4159	0.0487395	chr12	108237437	108238721	25613174	FALSE	TRUE
chr12_108297426_108297743	0.0138321	0.0486755	0.0348511	17188.5	0.148724	16888	363	75	0.0387611	1.4116	1.4116	16821	0.108688	chr12	108297426	108297743	25554152	FALSE	TRUE
chr12_108522950_108523852	0.0834351	0.0787354	-0.00469971	7168	-0.0594121	7828	407	83	0.393587	0.404959	-0.404959	7803	0.58704	chr12	108522950	108523852	25328043	FALSE	TRUE
chr12_10875137_10876180	0.0085907	0.00818634	-0.000404358	10193.5	0.0426829	13122	402	82	0.542399	0.265681	0.265681	13115	0.71225	chr12	10875137	10876180	10875137	FALSE	FALSE
chr12_108908702_108909475	0.0224152	0.0183868	-0.00402832	7398.5	-0.0648634	7589	404	83	0.351924	0.453551	-0.453551	7564	0.545787	chr12	108908702	108909475	24942420	FALSE	FALSE
chr12_109124224_109125964	0.0151138	0.0158386	0.000724792	12139.5	0.0757273	14695	410	83	0.276498	0.558307	0.558307	14717	0.465912	chr12	109124224	109125964	24725931	FALSE	FALSE
chr12_109162408_109162722	0.483887	0.742188	0.258301	18569	0.246386	18003	377	80	0.000534989	3.27165	3.27165	17980	0.00294119	chr12	109162408	109162722	24689173	FALSE	FALSE
chr12_109251205_109251586	0.0109406	0.00993347	-0.00100708	9373.5	-0.0684194	7440	397	80	0.330684	0.480586	-0.480586	7446	0.524304	chr12	109251205	109251586	24600309	FALSE	FALSE
chr12_109490238_109490673	0.0641479	0.0466614	-0.0174866	5203.5	-0.247594	2602	403	82	0.0004065	3.39094	-3.39094	2578	0.00230793	chr12	109490238	109490673	24361222	FALSE	FALSE
chr12_109531107_109531359	0.00548553	0.00421143	-0.00127411	9097.5	-0.0625232	7703	394	82	0.370937	0.430699	-0.430699	7692	0.564526	chr12	109531107	109531359	24320536	FALSE	FALSE
chr12_109535264_109536431	0.0325928	0.0317078	-0.00088501	9549	-0.0453874	8531	408	83	0.51454	0.28858	-0.28858	8514	0.690278	chr12	109535264	109536431	24315464	FALSE	FALSE
chr12_109592315_109592633	0.0153732	0.0163879	0.00101471	12612	0.0920114	15353	393	81	0.192049	0.716589	0.716589	15334	0.362651	chr12	109592315	109592633	24259262	FALSE	FALSE
chr12_109729572_109729826	0.221924	0.260254	0.0383301	17281.5	0.00462187	11109	398	81	0.948042	0.0231726	0.0231726	11108	0.973742	chr12	109729572	109729826	24122069	FALSE	FALSE
chr12_109746826_109748378	0.0389709	0.0392761	0.000305176	11434	-0.0327065	9140	403	83	0.638997	0.194501	-0.194501	9128	0.785684	chr12	109746826	109748378	24103517	FALSE	FALSE
chr12_109915131_109915638	0.00558472	0.00564575	6.10352e-05	11055	0.0272034	12316	403	81	0.699063	0.155483	0.155483	12310	0.826659	chr12	109915131	109915638	23936257	FALSE	FALSE
chr12_1099557_1100785	0.0209045	0.0205231	-0.00038147	10232.5	0.00071736	10893	408	82	0.992158	0.00341931	0.00341931	10893	0.996359	chr12	1099557	1100785	1099557	TRUE	FALSE
chr12_110151327_110152758	0.0299988	0.0412598	0.011261	16062.5	0.198221	17574	409	83	0.00439194	2.35734	2.35734	17590	0.0176242	chr12	110151327	110152758	23699137	FALSE	FALSE
chr12_110271000_110271582	0.375977	0.303223	-0.0727539	3145	-0.171979	4151	401	82	0.014096	1.85091	-1.85091	4133	0.0471028	chr12	110271000	110271582	23580313	FALSE	FALSE
chr12_110318011_110318778	0.00789642	0.0085144	0.000617981	11979	0.0612563	14051	391	82	0.382474	0.417399	0.417399	14050	0.576325	chr12	110318011	110318778	23533117	FALSE	FALSE
chr12_110337980_110338591	0.00653458	0.00566864	-0.000865936	9568.5	-0.00664361	10485	402	82	0.92473	0.0339849	-0.0339849	10486	0.962435	chr12	110337980	110338591	23513304	FALSE	FALSE
chr12_110433797_110434205	0.00943756	0.00892639	-0.000511169	10022.5	-0.0492143	8318	401	83	0.480079	0.318687	-0.318687	8302	0.66305	chr12	110433797	110434205	23417690	FALSE	FALSE
chr12_110437137_110437651	0.0120392	0.0122681	0.000228882	11305	-0.0184482	9844	392	82	0.792916	0.100773	-0.100773	9843	0.887282	chr12	110437137	110437651	23414244	FALSE	FALSE
chr12_110486083_110486574	0.0259705	0.0220032	-0.00396729	7411.5	-0.0924614	6490	393	83	0.185457	0.731756	-0.731756	6467	0.354057	chr12	110486083	110486574	23365321	FALSE	FALSE
chr12_110562095_110562700	0.0316772	0.0277252	-0.00395203	7416	-0.053906	8086	407	83	0.438912	0.357622	-0.357622	8068	0.628513	chr12	110562095	110562700	23289195	FALSE	FALSE
chr12_110718392_110720062	0.0345154	0.032074	-0.00244141	8178.5	-0.0868707	6693	409	83	0.211978	0.673708	-0.673708	6659	0.389032	chr12	110718392	110720062	23131833	FALSE	FALSE
chr12_110841021_110841548	0.00418854	0.00694275	0.00275421	14374	0.111544	16022	383	79	0.113727	0.944138	0.944138	16006	0.248691	chr12	110841021	110841548	23010347	FALSE	FALSE
chr12_110887861_110888245	0.059021	0.0538635	-0.00515747	7013	-0.136732	5026	410	83	0.049391	1.30635	-1.30635	4991	0.13141	chr12	110887861	110888245	22963650	FALSE	FALSE
chr12_110905879_110907183	0.00828552	0.00848389	0.000198364	11261	-0.000176746	10846	409	83	0.998311	0.000734209	-0.000734209	10846	0.999004	chr12	110905879	110907183	22944712	FALSE	FALSE
chr12_110939456_110940173	0.00953674	0.0132294	0.00369263	14815	0.198765	17581	404	83	0.0043219	2.36433	2.36433	17594	0.017399	chr12	110939456	110940173	22911722	FALSE	FALSE
chr12_111020507_111021192	0.00940704	0.00967407	0.000267029	11375	-0.0198511	9769	403	82	0.777091	0.109528	-0.109528	9764	0.8783	chr12	111020507	111021192	22830703	FALSE	FALSE
chr12_111051693_111052150	0.00772858	0.0092926	0.00156403	13359	0.0567986	13839	406	83	0.414789	0.382172	0.382172	13855	0.607053	chr12	111051693	111052150	22799745	FALSE	FALSE
chr12_111126611_111127347	0.187744	0.160522	-0.0272217	4613	-0.0820691	6856	409	83	0.238346	0.622792	-0.622792	6836	0.422043	chr12	111126611	111127347	22724548	FALSE	FALSE
chr12_111180006_111181028	0.0122604	0.0118866	-0.00037384	10244.5	-0.0227602	9623.5	404	82	0.745373	0.127626	-0.127626	9620	0.85803	chr12	111180006	111181028	22670867	FALSE	FALSE
chr12_111471061_111471578	0.241699	0.0739746	-0.167725	1457	-0.228617	2942	390	81	0.00119866	2.92131	-2.92131	2943	0.00585149	chr12	111471061	111471578	22380317	FALSE	TRUE
chr12_111471960_111473546	0.208008	0.143799	-0.064209	3368.5	-0.174464	4097	410	83	0.012155	1.91524	-1.91524	4047	0.0416489	chr12	111471960	111473546	22378349	FALSE	TRUE
chr12_111757754_111758521	0.834473	0.75293	-0.081543	2924.5	-0.263544	2358	383	80	0.000208126	3.68167	-3.68167	2394	0.00128652	chr12	111757754	111758521	22093374	FALSE	TRUE
chr12_111800834_111801244	0.97168	0.968262	-0.00341797	7665.5	-0.0800532	6944	376	80	0.260295	0.584534	-0.584534	6986	0.44697	chr12	111800834	111801244	22050651	FALSE	FALSE
chr12_111806559_111807060	0.0106201	0.00935364	-0.00126648	9105	-0.0490578	8330	398	80	0.48854	0.3111	-0.3111	8351	0.67008	chr12	111806559	111807060	22044835	FALSE	FALSE
chr12_111842938_111844392	0.0390625	0.0331421	-0.00592041	6782	-0.0671805	7492	408	83	0.334575	0.475507	-0.475507	7469	0.52806	chr12	111842938	111844392	22007503	FALSE	FALSE
chr12_111855896_111856750	0.95459	0.954102	-0.000488281	10074.5	0.0143094	11620	398	82	0.838568	0.0764615	0.0764615	11618	0.912129	chr12	111855896	111856750	21995145	FALSE	FALSE
chr12_112035612_112037558	0.0156555	0.0174255	0.00177002	13581.5	0.0634734	14150	410	83	0.361742	0.441601	0.441601	14165	0.555004	chr12	112035612	112037558	21814337	FALSE	FALSE
chr12_112123246_112124059	0.0113449	0.0112152	-0.0001297	10653.5	0.016487	11724	399	83	0.813167	0.0898204	0.0898204	11724	0.896891	chr12	112123246	112124059	21727836	FALSE	FALSE
chr12_112204498_112204979	0.020813	0.0894775	0.0686646	17786	0.42428	18659	390	81	1.82722e-09	8.73821	8.73821	18650	6.56586e-08	chr12	112204498	112204979	21646916	FALSE	FALSE
chr12_112279692_112280714	0.00473022	0.00568771	0.000957489	12511	0.0901851	15283	410	83	0.194885	0.710221	0.710221	15308	0.366382	chr12	112279692	112280714	21571181	FALSE	FALSE
chr12_112450905_112451856	0.0152969	0.0226593	0.00736237	15628.5	0.161833	17106	405	83	0.0200884	1.69705	1.69705	17128	0.0633658	chr12	112450905	112451856	21400039	FALSE	FALSE
chr12_112546147_112546706	0.00593567	0.00609589	0.000160217	11204	0.016336	11715	399	83	0.81508	0.0888	0.0888	11718	0.898342	chr12	112546147	112546706	21305189	FALSE	FALSE
chr12_112563184_112563788	0.0044136	0.00540543	0.000991821	12583.5	0.0594666	13964	393	81	0.395977	0.40233	0.40233	13965	0.589279	chr12	112563184	112563788	21288107	FALSE	FALSE
chr12_112819466_112820489	0.0162659	0.0162048	-6.10352e-05	10769.5	-0.0459078	8503	406	83	0.509909	0.292507	-0.292507	8480	0.686573	chr12	112819466	112820489	21031406	FALSE	FALSE
chr12_112856457_112857243	0.0125122	0.0120087	-0.00050354	10035.5	-0.012198	10215	402	83	0.861364	0.0648134	-0.0648134	10210	0.925533	chr12	112856457	112857243	20994652	FALSE	FALSE
chr12_113013099_113013529	0.671875	0.667969	-0.00390625	7452	0.00724681	11249	404	83	0.917472	0.0374072	0.0374072	11251	0.95828	chr12	113013099	113013529	20838366	FALSE	TRUE
chr12_11323771_11324331	0.00520325	0.00667572	0.00147247	13249	0.0574974	13879	391	81	0.411413	0.385722	0.385722	13875	0.603715	chr12	11323771	11324331	11323771	FALSE	FALSE
chr12_113494389_113495534	0.285889	0.228149	-0.0577393	3535.5	-0.212643	3250	405	83	0.00226369	2.64518	-2.64518	3200	0.010091	chr12	113494389	113495534	20356361	FALSE	TRUE
chr12_113515164_113515970	0.814453	0.814941	0.000488281	11778.5	-0.00598027	10527	381	79	0.933664	0.0298093	-0.0298093	10532	0.967014	chr12	113515164	113515970	20335925	FALSE	TRUE
chr12_113530914_113531476	0.447998	0.546387	0.0983887	18060	0.212435	17715	405	83	0.00228635	2.64086	2.64086	17733	0.0101726	chr12	113530914	113531476	20320419	FALSE	TRUE
chr12_113549885_113550165	0.90332	0.741211	-0.162109	1520	-0.451877	273	373	80	2.21426e-10	9.65477	-9.65477	297	1.14921e-08	chr12	113549885	113550165	20301730	FALSE	TRUE
chr12_113590806_113591304	0.0111694	0.0173492	0.00617981	15438.5	0.157602	17045	397	81	0.0252565	1.59763	1.59763	17039	0.076819	chr12	113590806	113591304	20260591	FALSE	FALSE
chr12_113592203_113592620	0.324707	0.429199	0.104492	18100	0.0170458	11764	394	81	0.809318	0.0918806	0.0918806	11748	0.895388	chr12	113592203	113592620	20259275	FALSE	TRUE
chr12_113622761_113623931	0.013031	0.0111465	-0.00188446	8564.5	-0.0379548	8875	406	83	0.585917	0.232164	-0.232164	8858	0.746661	chr12	113622761	113623931	20227964	FALSE	FALSE
chr12_113772633_113772934	0	0	0	10903.5	-0.0191488	9806	358	76	0.770978	0.112958	-0.112958	9743	0.873686	chr12	113772633	113772934	20078961	FALSE	FALSE
chr12_113796217_113796847	0.0115738	0.00876617	-0.00280762	7974.5	-0.0610167	7761	399	81	0.386386	0.412979	-0.412979	7773	0.579985	chr12	113796217	113796847	20055048	FALSE	FALSE
chr12_113900750_113906442	0.356689	0.255859	-0.10083	2541.5	-0.236203	2808	410	83	0.000685883	3.16375	-3.16375	2746	0.00363117	chr12	113900750	113906442	19945453	FALSE	TRUE
chr12_113908887_113910681	0.35498	0.148926	-0.206055	1022	-0.391478	674	408	83	1.85512e-08	7.73163	-7.73163	638	4.50226e-07	chr12	113908887	113910681	19941214	FALSE	TRUE
chr12_113913615_113914322	0.453125	0.227295	-0.22583	821.5	-0.262875	2371	397	83	0.00016449	3.78386	-3.78386	2340	0.00104365	chr12	113913615	113914322	19937573	FALSE	TRUE
chr12_113917394_113918107	0.533691	0.357422	-0.17627	1348.5	-0.257885	2447	403	83	0.000214425	3.66873	-3.66873	2403	0.0013198	chr12	113917394	113918107	19933788	FALSE	TRUE
chr12_114029318_114029752	0.194092	0.226685	0.0325928	17121.5	0.0383407	12906	396	82	0.584833	0.232968	0.232968	12900	0.745861	chr12	114029318	114029752	19822143	FALSE	TRUE
chr12_114404002_114404377	0.00250626	0.00156212	-0.000944138	9491	-0.0416511	8708	396	81	0.549525	0.260012	-0.260012	8682	0.718185	chr12	114404002	114404377	19447518	FALSE	FALSE
chr12_114833911_114834210	0.417725	0.184204	-0.233521	759.5	-0.308001	1678	385	81	1.30666e-05	4.88384	-4.88384	1689	0.00011662	chr12	114833911	114834210	19017685	FALSE	TRUE
chr12_114843022_114843610	0.311523	0.125122	-0.186401	1228	-0.294799	1862	395	83	2.40122e-05	4.61957	-4.61957	1812	0.000198366	chr12	114843022	114843610	19008285	FALSE	TRUE
chr12_114845861_114847650	0.569336	0.462158	-0.107178	2408.5	-0.261944	2388	406	83	0.000168521	3.77335	-3.77335	2346	0.00106597	chr12	114845861	114847650	19004245	FALSE	TRUE
chr12_114851957_114852360	0.437012	0.275879	-0.161133	1541	-0.201347	3498	385	81	0.00437997	2.35853	-2.35853	3521	0.0175875	chr12	114851957	114852360	18999535	FALSE	TRUE
chr12_114878143_114879155	0.49292	0.209229	-0.283691	407.5	-0.407757	556	399	82	5.94174e-09	8.22609	-8.22609	547	1.68673e-07	chr12	114878143	114879155	18972740	FALSE	TRUE
chr12_114885105_114885418	0.519531	0.238159	-0.28125	421	-0.3367	1279	396	81	1.78052e-06	5.74945	-5.74945	1278	2.1154e-05	chr12	114885105	114885418	18966477	FALSE	TRUE
chr12_115102687_115103982	0.754395	0.669434	-0.0849609	2854.5	-0.179929	3969	410	83	0.00970425	2.01304	-2.01304	3925	0.0344288	chr12	115102687	115103982	18747913	FALSE	TRUE
chr12_115109503_115110061	0.850586	0.81543	-0.0351562	4270	-0.0740022	7195	396	82	0.291468	0.53541	-0.53541	7195	0.48297	chr12	115109503	115110061	18741834	FALSE	FALSE
chr12_115112014_115112627	0.916504	0.910156	-0.00634766	6694	-0.0963556	6348	403	83	0.166751	0.777931	-0.777931	6312	0.328764	chr12	115112014	115112627	18739268	FALSE	FALSE
chr12_115120774_115122945	0.0503235	0.0370789	-0.0132446	5576.5	-0.0549421	8035	407	83	0.430164	0.366366	-0.366366	8013	0.620825	chr12	115120774	115122945	18728950	FALSE	FALSE
chr12_115173614_115174822	0.589355	0.608398	0.019043	16600	-0.0317042	9194	407	83	0.649066	0.187711	-0.187711	9180	0.792345	chr12	115173614	115174822	18677073	FALSE	TRUE
chr12_115889597_115889995	0.0307159	0.0705566	0.039856	17321.5	0.200792	17599	379	80	0.00474483	2.32378	2.32378	17572	0.0188161	chr12	115889597	115889995	17961900	FALSE	FALSE
chr12_116354787_116355187	0.0855713	0.136841	0.0512695	17543	0.229626	17870	407	83	0.000971875	3.01239	3.01239	17879	0.00488309	chr12	116354787	116355187	17496708	FALSE	FALSE
chr12_11653232_11653775	0.229736	0.113464	-0.116272	2237	-0.153362	4552	383	80	0.0309038	1.50999	-1.50999	4602	0.0904568	chr12	11653232	11653775	11653232	FALSE	TRUE
chr12_117175623_117176436	0.00284386	0.00442886	0.00158501	13380	0.112971	16066	398	80	0.108253	0.96556	0.96556	16054	0.239743	chr12	117175623	117176436	16675459	FALSE	FALSE
chr12_117257031_117257502	0	0	0	10903.5	0.0570658	13854	206	45	0.461785	0.335561	0.335561	13581	0.648357	chr12	117257031	117257502	16594393	FALSE	FALSE
chr12_117316389_117317611	0.145996	0.20105	0.0550537	17600	0.119912	16240	402	83	0.0853442	1.06883	1.06883	16259	0.200893	chr12	117316389	117317611	16534284	FALSE	TRUE
chr12_117318708_117319521	0.0340881	0.0335693	-0.000518799	10012.5	-0.0184884	9841	405	82	0.791979	0.101286	-0.101286	9840	0.886517	chr12	117318708	117319521	16532374	FALSE	FALSE
chr12_117348645_117349207	0.00595093	0.00567245	-0.000278473	10387	-0.000677319	10814	401	81	0.992656	0.00320114	-0.00320114	10814	0.996699	chr12	117348645	117349207	16502688	FALSE	FALSE
chr12_117536290_117537421	0.0418091	0.0686035	0.0267944	16924.5	0.191902	17511	402	83	0.00589348	2.22963	2.22963	17527	0.0226503	chr12	117536290	117537421	16314474	FALSE	FALSE
chr12_117627650_117628488	0.00839233	0.0101471	0.00175476	13567	0.0733815	14605	405	82	0.294592	0.530779	0.530779	14604	0.486084	chr12	117627650	117628488	16223407	FALSE	FALSE
chr12_117798076_117799448	0.340088	0.157715	-0.182373	1273	-0.304598	1726	403	81	1.50573e-05	4.82225	-4.82225	1716	0.000132014	chr12	117798076	117799448	16052447	FALSE	TRUE
chr12_11801853_11802218	0.00395203	0.00323868	-0.000713348	9744	-0.0615233	7744	404	83	0.377049	0.423602	-0.423602	7722	0.570733	chr12	11801853	11802218	11801853	FALSE	FALSE
chr12_11802752_11802983	0.00429916	0.00564957	0.0013504	13074	0.152911	16968	395	80	0.0303385	1.51801	1.51801	16944	0.0890524	chr12	11802752	11802983	11802752	FALSE	FALSE
chr12_118198767_118199287	0.813965	0.562988	-0.250977	612	-0.536532	45	404	83	1.33024e-14	13.8761	-13.8761	38	5.41811e-12	chr12	118198767	118199287	15652608	FALSE	TRUE
chr12_118406590_118407364	0.0394897	0.0682373	0.0287476	17002.5	0.352964	18499	404	82	4.60555e-07	6.33672	6.33672	18498	6.66328e-06	chr12	118406590	118407364	15444531	FALSE	FALSE
chr12_118499103_118499473	0.0109863	0.0104141	-0.000572205	9932	-0.0116616	10244	379	81	0.866171	0.0623964	-0.0623964	10236	0.928037	chr12	118499103	118499473	15352422	FALSE	FALSE
chr12_118541054_118542135	0.0175323	0.0157623	-0.00177002	8643.5	-0.00680473	10478	409	83	0.922426	0.0350687	-0.0350687	10478	0.961263	chr12	118541054	118542135	15309760	FALSE	FALSE
chr12_118573730_118574731	0.0330505	0.0317383	-0.00131226	9057	0.0180573	11819	403	83	0.795806	0.0991928	0.0991928	11821	0.888787	chr12	118573730	118574731	15277164	FALSE	FALSE
chr12_118809324_118811021	0.0265503	0.021347	-0.00520325	7000	-0.166441	4276	410	83	0.0167437	1.77615	-1.77615	4245	0.0542845	chr12	118809324	118811021	15040874	FALSE	FALSE
chr12_118814014_118814839	0.00585175	0.00750732	0.00165558	13460	0.124608	16372	403	83	0.0737109	1.13247	1.13247	16392	0.179637	chr12	118814014	118814839	15037056	FALSE	FALSE
chr12_119419105_119419810	0.252441	0.114868	-0.137573	1901	-0.207192	3378	391	83	0.00301735	2.52037	-2.52037	3338	0.0128515	chr12	119419105	119419810	14432085	FALSE	FALSE
chr12_120031494_120033212	0.16626	0.0947876	-0.0714722	3176	-0.248258	2591	408	83	0.000361142	3.44232	-3.44232	2541	0.0020794	chr12	120031494	120033212	13818683	FALSE	TRUE
chr12_120105502_120106232	0.0177155	0.0245361	0.00682068	15536	0.0363849	12807	401	83	0.601869	0.220498	0.220498	12818	0.758806	chr12	120105502	120106232	13745663	FALSE	FALSE
chr12_120426547_120428066	0.0175171	0.022995	0.00547791	15316	0.137202	16675.5	410	83	0.0486146	1.31323	1.31323	16692	0.129713	chr12	120426547	120428066	13423829	FALSE	FALSE
chr12_120554162_120555224	0.013916	0.0184021	0.00448608	15069	0.0579616	13905	407	83	0.405237	0.392291	0.392291	13919	0.598228	chr12	120554162	120555224	13296671	FALSE	FALSE
chr12_120632222_120632784	0.0288086	0.03125	0.00244141	14173	0.0430362	13139	397	82	0.539151	0.26829	0.26829	13135	0.709975	chr12	120632222	120632784	13219111	FALSE	FALSE
chr12_120638588_120639116	0.00252342	0.00463104	0.00210762	13899	0.101865	15718	382	80	0.140403	0.852625	0.852625	15767	0.289704	chr12	120638588	120639116	13212779	FALSE	FALSE
chr12_120702976_120703541	0.00392151	0.0033226	-0.000598907	9890.5	-0.0471474	8437	390	80	0.501571	0.299667	-0.299667	8435	0.680382	chr12	120702976	120703541	13148354	FALSE	FALSE
chr12_120799372_120799912	0.60498	0.43335	-0.171631	1392	-0.200948	3505	401	81	0.00432028	2.36449	-2.36449	3511	0.0173963	chr12	120799372	120799912	13051983	FALSE	TRUE
chr12_120806251_120807026	0.0400085	0.0592651	0.0192566	16612	0.0608672	14034	404	83	0.382403	0.417479	0.417479	14051	0.576264	chr12	120806251	120807026	13044869	FALSE	FALSE
chr12_120875654_120876366	0.00569916	0.00712967	0.00143051	13162	0.117218	16175	406	83	0.0922624	1.03498	1.03498	16196	0.213148	chr12	120875654	120876366	12975529	FALSE	FALSE
chr12_120884047_120884703	0.00915527	0.00958252	0.000427246	11660	-0.00354535	10674	401	83	0.959656	0.0178846	-0.0178846	10670	0.979469	chr12	120884047	120884703	12967192	FALSE	FALSE
chr12_120906678_120907894	0.0231018	0.0228577	-0.000244141	10450.5	-0.00377983	10651	408	83	0.957022	0.019078	-0.019078	10649	0.978379	chr12	120906678	120907894	12944001	FALSE	FALSE
chr12_120933649_120934713	0.00773621	0.00830841	0.000572205	11918.5	0.010424	11419	408	83	0.881262	0.054895	0.054895	11421	0.937291	chr12	120933649	120934713	12917182	FALSE	FALSE
chr12_120966788_120967038	0.00241852	0.00333214	0.00091362	12442	0.0600266	13988	399	81	0.389685	0.409286	0.409286	14006	0.583248	chr12	120966788	120967038	12884857	FALSE	FALSE
chr12_120972167_120972447	0.004776	0.00268745	-0.00208855	8389	-0.0545242	8058	392	83	0.433403	0.363108	-0.363108	8034	0.623545	chr12	120972167	120972447	12879448	FALSE	FALSE
chr12_121022419_121022704	0.020401	0.0601196	0.0397339	17318	0.198224	17575	387	80	0.0052082	2.28331	2.28331	17553	0.0203718	chr12	121022419	121022704	12829191	FALSE	FALSE
chr12_121078161_121079483	0.0209656	0.0385132	0.0175476	16516	0.3235	18404	408	83	3.34841e-06	5.47516	5.47516	18412	3.67091e-05	chr12	121078161	121079483	12772412	FALSE	FALSE
chr12_121124111_121125479	0.00652313	0.00705338	0.000530243	11852	-0.0308883	9231	408	83	0.657431	0.18215	-0.18215	9220	0.79829	chr12	121124111	121125479	12726416	FALSE	FALSE
chr12_121148239_121148853	0.00507736	0.0049057	-0.000171661	10587	-0.0502403	8267	401	82	0.472404	0.325687	-0.325687	8250	0.657282	chr12	121148239	121148853	12703042	FALSE	FALSE
chr12_121163472_121163913	0.0222931	0.0267639	0.00447083	15067	0.0710081	14504	395	83	0.309046	0.509977	0.509977	14521	0.502538	chr12	121163472	121163913	12687982	FALSE	FALSE
chr12_121177115_121177341	0.953125	0.94873	-0.00439453	7271.5	-0.000428534	10828	384	79	0.99558	0.00192397	-0.00192397	10829	0.998137	chr12	121177115	121177341	12674554	FALSE	FALSE
chr12_121341414_121342436	0.0199127	0.0243378	0.00442505	15058	0.0600919	13990	404	83	0.388453	0.410661	0.410661	14014	0.582105	chr12	121341414	121342436	12509459	FALSE	FALSE
chr12_121711846_121712162	0.967285	0.962891	-0.00439453	7271.5	-0.0947028	6410	387	80	0.181428	0.741295	-0.741295	6429	0.348712	chr12	121711846	121712162	12139733	FALSE	FALSE
chr12_121734045_121735169	0.0222473	0.0204163	-0.00183105	8596	-0.0159071	10011	409	83	0.819484	0.0864594	-0.0864594	10007	0.900572	chr12	121734045	121735169	12116726	FALSE	FALSE
chr12_121837380_121838396	0.00950623	0.0123367	0.00283051	14418.5	0.122969	16323	407	83	0.077313	1.11175	1.11175	16346	0.186163	chr12	121837380	121838396	12013499	FALSE	FALSE
chr12_121880053_121880718	0.933594	0.931641	-0.00195312	8493	-0.0544748	8063	397	83	0.435085	0.361426	-0.361426	8040	0.625514	chr12	121880053	121880718	11971177	FALSE	FALSE
chr12_121890758_121891144	0.95752	0.966309	0.00878906	15809	0.122251	16305	395	83	0.0798653	1.09764	1.09764	16315	0.190774	chr12	121890758	121891144	11960751	FALSE	FALSE
chr12_121905463_121905956	0.0555725	0.0586548	0.00308228	14562	0.0918474	15342	397	82	0.190284	0.720598	0.720598	15343	0.360263	chr12	121905463	121905956	11945939	FALSE	FALSE
chr12_121975028_121976140	0.027832	0.0389709	0.0111389	16044	0.227785	17851	405	83	0.00107277	2.96949	2.96949	17863	0.00532434	chr12	121975028	121976140	11875755	FALSE	FALSE
chr12_122016170_122017693	0.570801	0.551758	-0.019043	5088.5	-0.053386	8113.5	406	83	0.443443	0.353163	-0.353163	8095	0.632342	chr12	122016170	122017693	11834202	FALSE	TRUE
chr12_122018170_122018457	0.0150375	0.0123291	-0.00270844	8035	-0.101421	6194	387	80	0.152896	0.815603	-0.815603	6214	0.308426	chr12	122018170	122018457	11833438	FALSE	FALSE
chr12_122064176_122065142	0.00687408	0.00573349	-0.00114059	9235.5	-0.0707384	7339	404	83	0.309805	0.508911	-0.508911	7311	0.503209	chr12	122064176	122065142	11786753	FALSE	FALSE
chr12_122150513_122151091	0.00434113	0.00462723	0.000286102	11406	0.0714394	14532	397	83	0.305086	0.515578	0.515578	14544	0.49791	chr12	122150513	122151091	11700804	FALSE	FALSE
chr12_122230903_122232359	0.0293884	0.172119	0.1427	18310	0.380217	18566	405	82	5.56308e-08	7.25468	7.25468	18569	1.11955e-06	chr12	122230903	122232359	11619536	FALSE	FALSE
chr12_122235106_122235310	0.0121994	0.010849	-0.0013504	9023.5	-0.0271429	9418	381	82	0.699737	0.155065	-0.155065	9419	0.827147	chr12	122235106	122235310	11616585	FALSE	FALSE
chr12_122238028_122239351	0.0343018	0.0278473	-0.00645447	6659	-0.199794	3538	410	83	0.00408196	2.38913	-2.38913	3483	0.0165827	chr12	122238028	122239351	11612544	FALSE	FALSE
chr12_122240899_122243390	0.0199127	0.0199738	6.10352e-05	11055	-0.00645123	10493	409	83	0.92646	0.0331733	-0.0331733	10489	0.96371	chr12	122240899	122243390	11608505	FALSE	FALSE
chr12_122247781_122248424	0.934082	0.930664	-0.00341797	7665.5	-0.0676829	7467	400	82	0.334216	0.475973	-0.475973	7466	0.527755	chr12	122247781	122248424	11603471	FALSE	FALSE
chr12_122265374_122265954	0.907227	0.901367	-0.00585938	6804	-0.0804605	6923	404	83	0.248169	0.605253	-0.605253	6898	0.433815	chr12	122265374	122265954	11585941	FALSE	FALSE
chr12_122326482_122327044	0.00273132	0.00290871	0.000177383	11231	-0.0243704	9542	388	79	0.728356	0.137656	-0.137656	9539	0.846922	chr12	122326482	122327044	11524851	FALSE	FALSE
chr12_122356315_122356853	0.164307	0.816406	0.652344	18731	0.454085	18682	400	82	9.114e-11	10.0403	10.0403	18681	5.54415e-09	chr12	122356315	122356853	11495042	FALSE	FALSE
chr12_122516193_122517207	0.0197449	0.0158691	-0.00387573	7482	-0.0851895	6753	410	83	0.220861	0.655881	-0.655881	6717	0.400276	chr12	122516193	122517207	11334688	FALSE	FALSE
chr12_122667648_122668038	0.130371	0.333008	0.202637	18481	0.159452	17078	378	77	0.0273785	1.56259	1.56259	16998	0.0821266	chr12	122667648	122668038	11183857	FALSE	FALSE
chr12_122687800_122689106	0.161865	0.161133	-0.000732422	9710.5	0.0672073	14317	409	82	0.33672	0.472731	0.472731	14318	0.53009	chr12	122687800	122689106	11162789	FALSE	FALSE
chr12_122710054_122711371	0.0382996	0.0305481	-0.00775146	6401	-0.113407	5759	407	83	0.103343	0.985717	-0.985717	5717	0.231885	chr12	122710054	122711371	11140524	FALSE	FALSE
chr12_122750769_122751228	0.00489044	0.00667191	0.00178146	13592	0.120334	16250	408	83	0.0835437	1.07809	1.07809	16272	0.197411	chr12	122750769	122751228	11100667	FALSE	FALSE
chr12_122906404_122907011	0.00787354	0.0112152	0.00334167	14687	0.164096	17144	401	81	0.0197478	1.70448	1.70448	17130	0.0624779	chr12	122906404	122907011	10944884	FALSE	FALSE
chr12_122984995_122985644	0.00408554	0.00294495	-0.00114059	9235.5	-0.0836714	6801	398	83	0.228765	0.64061	-0.64061	6778	0.409844	chr12	122984995	122985644	10866251	FALSE	FALSE
chr12_123011261_123011765	0.00724792	0.00694275	-0.000305176	10341	0.032069	12580	405	83	0.645218	0.190294	0.190294	12596	0.790112	chr12	123011261	123011765	10840130	FALSE	FALSE
chr12_123236994_123237664	0.00565338	0.00500488	-0.000648499	9818.5	-0.0589695	7846	398	83	0.397625	0.400526	-0.400526	7828	0.590747	chr12	123236994	123237664	10614231	FALSE	FALSE
chr12_123319750_123321043	0.0140991	0.0150681	0.000968933	12524.5	0.0188401	11858	408	83	0.786805	0.104133	0.104133	11868	0.883734	chr12	123319750	123321043	10530852	FALSE	FALSE
chr12_123380333_123380894	0.00666809	0.0055542	-0.00111389	9263.5	-0.0530769	8131	391	81	0.449281	0.347482	-0.347482	8126	0.637341	chr12	123380333	123380894	10471001	FALSE	FALSE
chr12_123450868_123451207	0.0142746	0.0130692	-0.00120544	9167	-0.00499597	10592	393	82	0.94357	0.025226	-0.025226	10591	0.971358	chr12	123450868	123451207	10400688	FALSE	FALSE
chr12_123459151_123460032	0.00629807	0.00505829	-0.00123978	9130	-0.115615	5677	406	83	0.0967769	1.01423	-1.01423	5631	0.220989	chr12	123459151	123460032	10391863	FALSE	FALSE
chr12_123464820_123465972	0.0161591	0.015152	-0.00100708	9373.5	-0.00159071	10770.5	409	83	0.982097	0.00784558	-0.00784558	10768	0.99081	chr12	123464820	123465972	10385923	FALSE	FALSE
chr12_123470553_123471102	0.966309	0.970703	0.00439453	15036	0.0169137	11752	388	80	0.811904	0.0904951	0.0904951	11729	0.896384	chr12	123470553	123471102	10380793	FALSE	FALSE
chr12_123634826_123636176	0.0336914	0.0473022	0.0136108	16249	0.132826	16592	407	83	0.05641	1.24864	1.24864	16608	0.146162	chr12	123634826	123636176	10215719	FALSE	FALSE
chr12_123717367_123718388	0.00512695	0.00650787	0.00138092	13108	0.132361	16581	403	82	0.0584806	1.23299	1.23299	16585	0.150259	chr12	123717367	123718388	10133507	FALSE	FALSE
chr12_123755246_123756408	0.0260162	0.0170135	-0.00900269	6135	-0.155762	4504	404	83	0.0253527	1.59598	-1.59598	4465	0.0770242	chr12	123755246	123756408	10095487	FALSE	FALSE
chr12_123848617_123849919	0.0175629	0.0170898	-0.000473022	10110	-0.0225836	9633	405	82	0.747259	0.126529	-0.126529	9629	0.859313	chr12	123848617	123849919	10001976	FALSE	FALSE
chr12_123868267_123869381	0.00948334	0.0102539	0.000770569	12212	0.0418549	13071	405	82	0.550089	0.259567	0.259567	13077	0.718522	chr12	123868267	123869381	9982514	TRUE	FALSE
chr12_123873794_123874597	0.0486755	0.0554199	0.00674438	15531	0.135585	16647	407	82	0.0526586	1.27853	1.27853	16656	0.138362	chr12	123873794	123874597	9977298	TRUE	FALSE
chr12_123920582_123921462	0.0313721	0.0237579	-0.00761414	6437	-0.0870414	6683	401	83	0.21182	0.674032	-0.674032	6656	0.388856	chr12	123920582	123921462	9930433	TRUE	FALSE
chr12_124017593_124018994	0.0542603	0.039856	-0.0144043	5465	-0.237117	2787	408	82	0.000699599	3.15515	-3.15515	2752	0.00369439	chr12	124017593	124018994	9832901	TRUE	FALSE
chr12_124068935_124069699	0.0301819	0.0243835	-0.00579834	6828.5	-0.0793763	6968	408	83	0.254183	0.594853	-0.594853	6941	0.440431	chr12	124068935	124069699	9782196	TRUE	FALSE
chr12_124086217_124087015	0.0243378	0.01828	-0.00605774	6759	-0.152049	4595	408	83	0.0289088	1.53897	-1.53897	4546	0.0858785	chr12	124086217	124087015	9764880	TRUE	FALSE
chr12_124118097_124118479	0.00280762	0.00277328	-3.43323e-05	10812.5	-0.0452261	8538	398	82	0.51715	0.286384	-0.286384	8523	0.692441	chr12	124118097	124118479	9733416	TRUE	FALSE
chr12_124155578_124156171	0.0133667	0.0110474	-0.00231934	8260	-0.0971013	6325	404	83	0.163398	0.786753	-0.786753	6293	0.323584	chr12	124155578	124156171	9695724	TRUE	FALSE
chr12_124196646_124197507	0.0106125	0.0122147	0.00160217	13404.5	0.0172711	11774	406	83	0.804405	0.0945254	0.0945254	11777	0.892957	chr12	124196646	124197507	9654388	TRUE	FALSE
chr12_12419679_12420541	0.00784302	0.00863647	0.000793457	12254	0.0659967	14258	404	83	0.343562	0.463995	0.463995	14281	0.537714	chr12	12419679	12420541	12419679	FALSE	FALSE
chr12_124246524_124247254	0.214966	0.716797	0.501953	18703	0.286771	18247	394	82	4.36201e-05	4.36031	4.36031	18242	0.000331683	chr12	124246524	124247254	9604641	TRUE	FALSE
chr12_124272128_124272585	0.79834	0.609375	-0.188965	1198	-0.495752	117	399	82	1.50439e-12	11.8226	-11.8226	113	2.01972e-10	chr12	124272128	124272585	9579310	TRUE	TRUE
chr12_124456573_124458728	0.0349731	0.0454407	0.0104675	15992	0.145284	16838	410	83	0.0367862	1.43431	1.43431	16853	0.104331	chr12	124456573	124458728	9393167	TRUE	FALSE
[truncated: 16,739 more rows]

## Sheet: LOLA_core
Supplementary Table S6b: LOLA Core output
Region enrichment analysis with the LOLA Core sets
	userSet	dbSet	collection	pValueLog	oddsRatio	support	rnkPV	rnkOR	rnkSup	maxRnk	meanRnk	b	c	d	description	cellType	tissue	antibody	treatment	dataSource	filename	size	id	axis_label	pval	qval	-log10_qval
0	demeth_ccle.bed	437	encode_segmentation	282.14	13.4292	833	1	64	4	64	23	4824	166	12912	Repressed Segments	Hepg2				ENCODE segmentation	Hepg2_R.bed	346815	Repressed Segments_437	Repressed Segments	7.23709e-283	2.17981e-279	278.662
1	demeth_ccle.bed	416	encode_segmentation	260.84	13.0298	856	2	65	3	65	23.3	5584	143	12152	Repressed Segments	GM12878				ENCODE segmentation	Gm12878_R.bed	719258	Repressed Segments_416	Repressed Segments	1.44526e-261	2.17657e-258	257.662
2	demeth_ccle.bed	430	encode_segmentation	235.601	11.6498	858	3	69	2	69	24.7	6086	141	11650	Repressed Segments	HeLa-S3				ENCODE segmentation	Helas3_R.bed	1594290	Repressed Segments_430	Repressed Segments	2.50465e-236	2.51467e-233	232.6
3	demeth_ccle.bed	451	encode_segmentation	221.37	9.2767	790	4	79	6	79	29.7	5134	209	12602	Repressed Segments	K562				ENCODE segmentation	K562_R.bed	459545	Repressed Segments_451	Repressed Segments	4.2673e-222	3.21328e-219	218.493
4	demeth_ccle.bed	444	encode_segmentation	211.156	8.18065	704	5	101	9	101	38.3	4005	295	13731	Repressed Segments	Huvec				ENCODE segmentation	Huvec_R.bed	1593561	Repressed Segments_444	Repressed Segments	6.98926e-212	4.21033e-209	208.376
5	demeth_ccle.bed	3005	ucsc_features	67.4395	3.72462	348	6	166	17	166	63	2226	651	15510	UCSC LaminB1 Lads						laminB1Lads.bed	1302	UCSC LaminB1 Lads_3005	UCSC LaminB1 Lads	3.63492e-68	1.82473e-65	64.7388
6	demeth_ccle.bed	423	encode_segmentation	52.4357	3.58414	267	7	168	21	168	65.3	1638	732	16098	Repressed Segments	H1hesc				ENCODE segmentation	H1hesc_R.bed	543759	Repressed Segments_423	Repressed Segments	3.66664e-53	1.5777e-50	49.802
7	demeth_ccle.bed	1244	sheffield_dnase	39.1304	3.81882	172	8	164	45	164	72.3	916	827	16820	Weak stem specific						111.bed	16567	Weak stem specific_1244	Weak stem specific	7.40608e-40	2.78839e-37	36.5546
8	demeth_ccle.bed	2525	sheffield_dnase	28.8272	3.51087	137	9	178	61	178	82.7	768	862	16968	Weak stem and endothelial						410.bed	9166	Weak stem and endothelial_2525	Weak stem and endothelial	1.48854e-29	4.98166e-27	26.3026
9	demeth_ccle.bed	1195	sheffield_dnase	26.7443	3.33146	136	11	186	63	186	86.7	801	863	16935	Brain						1055.bed	5748	Brain_1195	Brain	1.8019e-27	4.93393e-25	24.3068
10	demeth_ccle.bed	159	cistrome_epigenome	28.5338	2.95826	178	10	212	41	212	87.7	1211	821	16525	cistrome_epigenome LnCaP H3K27me3	LnCaP	prostate	H3K27me3	R1881(16hr)		Human_LnCaP_H3K27me3_R1881-16hr_Chinnaiyan.bed	11283	cistrome_epigenome LnCaP H3K27me3_159	cistrome_epigenome LnCaP H3K27me3	2.92553e-29	8.8117e-27	26.0549
11	demeth_ccle.bed	190	cistrome_epigenome	25.5039	3.26376	133	12	188	65	188	88.3	797	866	16939	cistrome_epigenome MCF-7 H3K9me3	MCF-7	breast	H3K9me3	E2(3hr)		Human_MCF-7_H3K9me3_E2-3hr_Liu.bed	47408	cistrome_epigenome MCF-7 H3K9me3_190	cistrome_epigenome MCF-7 H3K9me3	3.13435e-26	7.86722e-24	23.1042
12	demeth_ccle.bed	495	encode_tfbs	24.5846	2.2547	274	13	241	20	241	91.3	2546	725	15190	ChIP NHEK EZH2_(39875)	NHEK		EZH2_(39875)	None		wgEncodeAwgTfbsBroadNhekEzh239875UniPk.narrowPeak	7978	ChIP NHEK EZH2_(39875)_495	ChIP NHEK EZH2_(39875)	2.60253e-25	6.02985e-23	22.2197
13	demeth_ccle.bed	371	codex	20.9538	2.45177	180	15	228	39	228	94	1459	819	16277	K562 erythrocytic leukaemia cells (ATCC CCL-243) were grown according to standar	Embryonic Stem Cell		EZH2		GSE32509	GSM831028_EZH2.bed	3205	K562 erythrocytic leukaemia cells (ATCC CCL-243) were grown according to standar_371	K562 erythrocytic leukaemia cells (ATCC CCL-243) w	1.11219e-21	2.23327e-19	18.6511
14	demeth_ccle.bed	470	encode_tfbs	19.5082	2.37907	177	17	234	42	234	97.7	1472	822	16264	ChIP HMEC EZH2_(39875)	HMEC		EZH2_(39875)	None		wgEncodeAwgTfbsBroadHmecEzh239875UniPk.narrowPeak	4626	ChIP HMEC EZH2_(39875)_470	ChIP HMEC EZH2_(39875)	3.10346e-20	5.4986e-18	17.2597
15	demeth_ccle.bed	461	encode_tfbs	19.3947	2.17409	222	18	247	30	247	98.3	2060	777	15676	ChIP H1-hESC EZH2_(39875)	H1-hESC		EZH2_(39875)	None		wgEncodeAwgTfbsBroadH1hescEzh239875UniPk.narrowPeak	6370	ChIP H1-hESC EZH2_(39875)_461	ChIP H1-hESC EZH2_(39875)	4.0295e-20	6.7427e-18	17.1712
16	demeth_ccle.bed	189	cistrome_epigenome	20.0479	3.13577	108	16	193	89	193	99.3	660	891	17076	cistrome_epigenome MCF-7 H3K9me3	MCF-7	breast	H3K9me3	DMSO(3hr)		Human_MCF-7_H3K9me3_DMSO-3hr_Liu.bed	31814	cistrome_epigenome MCF-7 H3K9me3_189	cistrome_epigenome MCF-7 H3K9me3	8.95656e-21	1.68607e-18	17.7731
17	demeth_ccle.bed	1197	sheffield_dnase	17.9728	2.4289	153	19	231	51	231	100	1229	846	16507	Stem and SK-N-SH_RA						1057.bed	4647	Stem and SK-N-SH_RA_1197	Stem and SK-N-SH_RA	1.06463e-18	1.68771e-16	15.7727
18	demeth_ccle.bed	1144	sheffield_dnase	24.5	6.24189	62	14	114	178	178	102	186	937	17550	Stem cell specific (weak)						10.bed	63200	Stem cell specific (weak)_1144	Stem cell specific (weak)	3.16242e-25	6.80373e-23	22.1673
19	demeth_ccle.bed	1152	sheffield_dnase	16.2481	2.43581	135	20	230	64	230	105	1069	864	16667	Weak HepG2 specific						1008.bed	23313	Weak HepG2 specific_1152	Weak HepG2 specific	5.64839e-17	8.50647e-15	14.0703
20	demeth_ccle.bed	1032	encode_tfbs	14.1672	2.21648	143	22	246	60	246	109	1243	856	16493	ChIP NT2-D1 SUZ12	NT2-D1		SUZ12	None		wgEncodeAwgTfbsSydhNt2d1Suz12UcdUniPk.narrowPeak	3308	ChIP NT2-D1 SUZ12_1032	ChIP NT2-D1 SUZ12	6.80499e-15	9.31666e-13	12.0307
21	demeth_ccle.bed	149	cistrome_epigenome	15.4196	1.72704	414	21	296	13	296	110	5155	585	12581	cistrome_epigenome APL164 cells H3K27me3	APL164 cells	hematopoietic stem cell	H3K27me3	ATRA(48hr)		Human_APL164-cells_H3K27me3_ATRA-48hr_Stunnenberg.bed	39984	cistrome_epigenome APL164 cells H3K27me3_149	cistrome_epigenome APL164 cells H3K27me3	3.80573e-16	5.4585e-14	13.2629
22	demeth_ccle.bed	474	encode_tfbs	12.0672	2.04001	147	26	255	53	255	111	1383	852	16353	ChIP HSMMtube EZH2_(39875)	HSMMtube		EZH2_(39875)	None		wgEncodeAwgTfbsBroadHsmmtEzh239875UniPk.narrowPeak	2700	ChIP HSMMtube EZH2_(39875)_474	ChIP HSMMtube EZH2_(39875)	8.56719e-13	9.92476e-11	10.0033
23	demeth_ccle.bed	3003	ucsc_features	11.4077	1.95778	155	29	262	50	262	114	1521	844	16215	UCSC Genomic superdups						genomicSuperDups.bed	51599	UCSC Genomic superdups_3003	UCSC Genomic superdups	3.91112e-12	3.95139e-10	9.40325
24	demeth_ccle.bed	813	encode_tfbs	12.469	2.30518	112	24	239	84	239	116	921	887	16815	ChIP H1-hESC SUZ12	H1-hESC		SUZ12	None		wgEncodeAwgTfbsSydhH1hescSuz12UcdUniPk.narrowPeak	4789	ChIP H1-hESC SUZ12_813	ChIP H1-hESC SUZ12	3.39637e-13	4.26245e-11	10.3703
25	demeth_ccle.bed	158	cistrome_epigenome	12.3583	2.43942	98	25	229	97	229	117	757	901	16979	cistrome_epigenome LnCaP H3K27me3	LnCaP	prostate	H3K27me3	EtOH(16hr)		Human_LnCaP_H3K27me3_EtOH-16hr_Chinnaiyan.bed	9193	cistrome_epigenome LnCaP H3K27me3_158	cistrome_epigenome LnCaP H3K27me3	4.38206e-13	5.2795e-11	10.2774
26	demeth_ccle.bed	491	encode_tfbs	10.8998	1.73749	225	31	295	29	295	118	2542	774	15194	ChIP NH-A EZH2_(39875)	NH-A		EZH2_(39875)	None		wgEncodeAwgTfbsBroadNhaEzh239875UniPk.narrowPeak	6493	ChIP NH-A EZH2_(39875)_491	ChIP NH-A EZH2_(39875)	1.25961e-11	1.22385e-09	8.91227
27	demeth_ccle.bed	498	encode_tfbs	10.8661	1.77514	205	32	290	31	290	118	2252	794	15484	ChIP NHLF EZH2_(39875)	NHLF		EZH2_(39875)	None		wgEncodeAwgTfbsBroadNhlfEzh239875UniPk.narrowPeak	7030	ChIP NHLF EZH2_(39875)_498	ChIP NHLF EZH2_(39875)	1.36099e-11	1.28104e-09	8.89244
28	demeth_ccle.bed	421	encode_segmentation	9.58563	1.51063	451	35	310	12	310	119	6255	548	11481	Enhancers Segments	H1hesc				ENCODE segmentation	H1hesc_E.bed	52106	Enhancers Segments_421	Enhancers Segments	2.5964e-10	2.23438e-08	7.65084
29	demeth_ccle.bed	221	cistrome_epigenome	11.8832	2.41089	96	27	232	101	232	120	749	903	16987	cistrome_epigenome metastatic prostate cancer tissue H3K27me3	metastatic prostate cancer tissue	prostate	H3K27me3	No treatment		Human_metastatic-prostate-cancer-tissue_H3K27me3_No-treatment_Chinnaiyan.bed	15510	cistrome_epigenome metastatic prostate cancer tissue H3K27me3_221	cistrome_epigenome metastatic prostate cancer tiss	1.30865e-12	1.45987e-10	9.83568
30	demeth_ccle.bed	378	codex	10.2324	1.95091	137	33	265	61	265	120	1336	862	16400	K562 erythrocytic leukaemia cells (ATCC CCL-243) were grown according to standar	Embryonic Stem Cell		SUZ12		GSE32509	GSM831042_SUZ12.bed	2682	K562 erythrocytic leukaemia cells (ATCC CCL-243) were grown according to standar_378	K562 erythrocytic leukaemia cells (ATCC CCL-243) w	5.85603e-11	5.34496e-09	8.27206
31	demeth_ccle.bed	476	encode_tfbs	9.15382	1.68164	204	36	300	32	300	123	2348	795	15388	ChIP HUVEC EZH2_(39875)	HUVEC		EZH2_(39875)	None		wgEncodeAwgTfbsBroadHuvecEzh239875UniPk.narrowPeak	6234	ChIP HUVEC EZH2_(39875)_476	ChIP HUVEC EZH2_(39875)	7.01743e-10	5.87125e-08	7.23127
32	demeth_ccle.bed	177	cistrome_epigenome	8.0956	1.63667	195	42	301	35	301	126	2289	804	15447	cistrome_epigenome MCF-7 H3K27me3	MCF-7	breast	H3K27me3	E2(3hr)		Human_MCF-7_H3K27me3_E2-3hr_Liu.bed	49075	cistrome_epigenome MCF-7 H3K27me3_177	cistrome_epigenome MCF-7 H3K27me3	8.02412e-09	5.75444e-07	6.24
33	demeth_ccle.bed	369	codex	8.70365	2.04897	98	39	253	97	253	130	894	901	16842	K562 erythrocytic leukaemia cells (ATCC CCL-243) were grown according to standar	Erythrocytic leukaemia cells		SUZ12		GSE32509	GSM831021_SUZ12.bed	2804	K562 erythrocytic leukaemia cells (ATCC CCL-243) were grown according to standar_369	K562 erythrocytic leukaemia cells (ATCC CCL-243) w	1.97857e-09	1.52807e-07	6.81586
34	demeth_ccle.bed	3000	ucsc_features	4.58203	1.39004	812	63	323	5	323	130	13435	187	4301	UCSC coriellDelDup table						coriellDelDup.bed	957	UCSC coriellDelDup table_3000	UCSC coriellDelDup table	2.61802e-05	0.00125166	2.90251
35	demeth_ccle.bed	176	cistrome_epigenome	7.34147	1.69559	147	43	298	53	298	131	1638	852	16098	cistrome_epigenome MCF-7 H3K27me3	MCF-7	breast	H3K27me3	DMSO(3hr)		Human_MCF-7_H3K27me3_DMSO-3hr_Liu.bed	31472	cistrome_epigenome MCF-7 H3K27me3_176	cistrome_epigenome MCF-7 H3K27me3	4.55542e-08	3.19091e-06	5.49608
36	demeth_ccle.bed	2877	sheffield_dnase	12.5322	3.40103	57	23	181	204	204	136	310	942	17426	Weak Huh specific						860.bed	113875	Weak Huh specific_2877	Weak Huh specific	2.93609e-13	3.845e-11	10.4151
37	demeth_ccle.bed	1235	sheffield_dnase	11.6547	3.06892	61	28	196	187	196	137	368	938	17368	Stem;Colon;Liver						110.bed	2519	Stem;Colon;Liver_1235	Stem;Colon;Liver	2.21481e-12	2.38251e-10	9.62297
38	demeth_ccle.bed	1216	sheffield_dnase	7.01934	1.81163	109	44	281	88	281	138	1123	890	16613	Weak						1078.bed	13903	Weak_1216	Weak	9.5645e-08	6.54734e-06	5.18394
39	demeth_ccle.bed	493	encode_tfbs	4.9669	1.46692	175	58	316	44	316	139	2243	824	15493	ChIP NHDF-Ad EZH2_(39875)	NHDF-Ad		EZH2_(39875)	None		wgEncodeAwgTfbsBroadNhdfadEzh239875UniPk.narrowPeak	5739	ChIP NHDF-Ad EZH2_(39875)_493	ChIP NHDF-Ad EZH2_(39875)	1.0792e-05	0.000560441	3.25147
40	demeth_ccle.bed	200	cistrome_epigenome	3.78858	1.39567	162	74	322	48	322	148	2160	837	15576	cistrome_epigenome NB4 cells H3K9me3	NB4 cells	hematopoietic stem cell	H3K9me3	No treatment		Human_NB4-cells_H3K9me3_No-treatment_Stunnenberg.bed	107924	cistrome_epigenome NB4 cells H3K9me3_200	cistrome_epigenome NB4 cells H3K9me3	0.000162713	0.00662287	2.17895
41	demeth_ccle.bed	472	encode_tfbs	5.01621	1.81852	71	57	280	142	280	160	716	928	17020	ChIP HSMM EZH2_(39875)	HSMM		EZH2_(39875)	None		wgEncodeAwgTfbsBroadHsmmEzh239875UniPk.narrowPeak	1540	ChIP HSMM EZH2_(39875)_472	ChIP HSMM EZH2_(39875)	9.63369e-06	0.000509064	3.29323
42	demeth_ccle.bed	210	cistrome_epigenome	6.7407	2.2623	57	46	240	204	240	163	462	942	17274	cistrome_epigenome VCaP H3K27me3	VCaP	prostate	H3K27me3	regular medium		Human_VCaP_H3K27me3_regular-medium_Chinnaiyan.bed	14547	cistrome_epigenome VCaP H3K27me3_210	cistrome_epigenome VCaP H3K27me3	1.81676e-07	1.17683e-05	4.92929
43	demeth_ccle.bed	1660	sheffield_dnase	11.405	4.7327	35	30	143	321	321	165	135	964	17601	Stem						157.bed	1295	Stem_1660	Stem	3.93565e-12	3.95139e-10	9.40325
44	demeth_ccle.bed	2960	sheffield_dnase	9.05055	3.58958	37	37	167	304	304	169	188	962	17548	sheffield_dnase						955.bed	12605	sheffield_dnase_2960	sheffield_dnase	8.90127e-10	7.24611e-08	7.13989
45	demeth_ccle.bed	182	cistrome_epigenome	2.66828	1.39849	96	92	321	101	321	171	1253	903	16483	cistrome_epigenome MCF-7 H3K4me2	MCF-7	breast	H3K4me2	EtOH(6hr)		Human_MCF-7_H3K4me2_EtOH-6hr_Barton.bed	36821	cistrome_epigenome MCF-7 H3K4me2_182	cistrome_epigenome MCF-7 H3K4me2	0.00214643	0.0702723	1.15322
46	demeth_ccle.bed	1690	sheffield_dnase	8.47382	4.14484	29	41	155	360	360	185	127	970	17609	MCF-7 and Epithelial						1605.bed	189760	MCF-7 and Epithelial_1690	MCF-7 and Epithelial	3.35876e-09	2.46746e-07	6.60775
47	demeth_ccle.bed	116	cistrome_cistrome	4.75247	2.09225	45	60	250	246	250	185	391	954	17345	cistrome_cistrome T47D ESR1	T47D	breast	ESR1	full media		Human_T47D_ESR1_full-media_Hurtado.bed	17642	cistrome_cistrome T47D ESR1_116	cistrome_cistrome T47D ESR1	1.76819e-05	0.000887632	3.05177
48	demeth_ccle.bed	2438	sheffield_dnase	8.7417	4.75963	26	38	142	388	388	189	99	973	17637	Stem						311.bed	1472	Stem_2438	Stem	1.8126e-09	1.43672e-07	6.84263
49	demeth_ccle.bed	2478	sheffield_dnase	10.0851	8.03049	20	34	102	446	446	194	45	979	17691	Stem						354.bed	4735	Stem_2478	Stem	8.22029e-11	7.28221e-09	8.13774
50	demeth_ccle.bed	426	encode_segmentation	3.61838	1.74294	54	75	293	216	293	195	563	945	17173	Weak Enhancer Segments	H1hesc				ENCODE segmentation	H1hesc_WE.bed	123430	Weak Enhancer Segments_426	Weak Enhancer Segments	0.000240781	0.00953958	2.02047
51	demeth_ccle.bed	417	encode_segmentation	1.24316	1.16312	147	186	347	53	347	195	2291	852	15445	Transcribed Segments	GM12878				ENCODE segmentation	Gm12878_T.bed	621374	Transcribed Segments_417	Transcribed Segments	0.0571268	0.922889	0.0348503
52	demeth_ccle.bed	2526	sheffield_dnase	6.80411	3.47376	28	45	179	368	368	197	146	971	17590	Stem;Liver						412.bed	803	Stem;Liver_2526	Stem;Liver	1.56997e-07	1.05084e-05	4.97846
53	demeth_ccle.bed	2032	sheffield_dnase	6.73604	3.54184	27	47	177	378	378	201	138	972	17598	sheffield_dnase						2037.bed	23100	sheffield_dnase_2032	sheffield_dnase	1.83635e-07	1.17683e-05	4.92929
54	demeth_ccle.bed	181	cistrome_epigenome	1.40618	1.24388	84	142	341	121	341	201	1219	915	16517	cistrome_epigenome MCF-7 H3K4me2	MCF-7	breast	H3K4me2	E2(6hr)		Human_MCF-7_H3K4me2_E2-6hr_Barton.bed	54266	cistrome_epigenome MCF-7 H3K4me2_181	cistrome_epigenome MCF-7 H3K4me2	0.0392486	0.832512	0.0796095
55	demeth_ccle.bed	2798	sheffield_dnase	8.68293	7.37718	18	40	106	477	477	208	44	981	17692	Stem;Brain						754.bed	442	Stem;Brain_2798	Stem;Brain	2.07526e-09	1.56267e-07	6.80613
56	demeth_ccle.bed	223	cistrome_epigenome	5.72131	3.35932	24	53	184	402	402	213	129	975	17607	cistrome_epigenome metastatic prostate cancer tissue H3K9me3	metastatic prostate cancer tissue	prostate	H3K9me3	No treatment		Human_metastatic-prostate-cancer-tissue_H3K9me3_No-treatment_Chinnaiyan.bed	11237	cistrome_epigenome metastatic prostate cancer tissue H3K9me3_223	cistrome_epigenome metastatic prostate cancer tiss	1.89974e-06	0.000107962	3.96673
57	demeth_ccle.bed	150	cistrome_epigenome	0.883169	1.10479	177	241	355	42	355	213	2893	822	14843	cistrome_epigenome APL164 cells H3K27me3	APL164 cells	hematopoietic stem cell	H3K27me3	No treatment		Human_APL164-cells_H3K27me3_No-treatment_Stunnenberg.bed	15071	cistrome_epigenome APL164 cells H3K27me3_150	cistrome_epigenome APL164 cells H3K27me3	0.130867	1	0
58	demeth_ccle.bed	2935	sheffield_dnase	4.645	2.59365	28	61	220	368	368	216	195	971	17541	DNase Hepatocyte specific						927.bed	33964	DNase Hepatocyte specific_2935	DNase Hepatocyte specific	2.26465e-05	0.00110431	2.95691
59	demeth_ccle.bed	1280	sheffield_dnase	5.36291	3.39056	22	55	182	424	424	220	117	977	17619	Brain;Stem						1155.bed	409	Brain;Stem_1280	Brain;Stem	4.33598e-06	0.000237454	3.62442
60	demeth_ccle.bed	2916	sheffield_dnase	3.87137	2.23806	30	70	242	354	354	222	242	969	17494	Medullo and SK-N-SH_RA						905.bed	4884	Medullo and SK-N-SH_RA_2916	Medullo and SK-N-SH_RA	0.00013447	0.00578606	2.23762
61	demeth_ccle.bed	172	cistrome_epigenome	5.46545	3.88799	19	54	163	459	459	225	88	980	17648	cistrome_epigenome LnCaP H3K9me3	LnCaP	prostate	H3K9me3	R1881(16hr)		Human_LnCaP_H3K9me3_R1881-16hr_Chinnaiyan.bed	4675	cistrome_epigenome LnCaP H3K9me3_172	cistrome_epigenome LnCaP H3K9me3	3.42412e-06	0.00019099	3.71899
62	demeth_ccle.bed	204	cistrome_epigenome	2.78294	1.76135	37	89	291	304	304	228	379	962	17357	cistrome_epigenome UPR9 cells H3K27me3	UPR9 cells	hematopoietic stem cell	H3K27me3	Zinc(5hr)		Human_UPR9-cells_H3K27me3_Zinc-5hr_Stunnenberg.bed	6509	cistrome_epigenome UPR9 cells H3K27me3_204	cistrome_epigenome UPR9 cells H3K27me3	0.00164841	0.0557865	1.25347
63	demeth_ccle.bed	2218	sheffield_dnase	1.48949	1.34617	50	133	328	229	328	230	668	949	17068	Prostate Cancer						2279.bed	9540	Prostate Cancer_2218	Prostate Cancer	0.0323976	0.733695	0.134484
64	demeth_ccle.bed	2070	sheffield_dnase	6.39215	5.53426	16	48	133	525	525	235	52	983	17684	sheffield_dnase						2089.bed	28533	sheffield_dnase_2070	sheffield_dnase	4.05373e-07	2.54372e-05	4.59453
65	demeth_ccle.bed	431	encode_segmentation	0.598393	1.07151	129	292	358	69	358	240	2156	870	15580	Transcribed Segments	HeLa-S3				ENCODE segmentation	Helas3_T.bed	1472755	Transcribed Segments_431	Transcribed Segments	0.25212	1	0
66	demeth_ccle.bed	1380	sheffield_dnase	4.09569	2.9013	20	65	213	446	446	241	124	979	17612	Brain;Stem						1266.bed	260	Brain;Stem_1380	Brain;Stem	8.02253e-05	0.00371752	2.42975
67	demeth_ccle.bed	208	cistrome_epigenome	2.10462	1.61787	34	111	303	327	327	247	378	965	17358	cistrome_epigenome VCaP H3K27me3	VCaP	prostate	H3K27me3	EtOH(16hr)		Human_VCaP_H3K27me3_EtOH-16hr_Chinnaiyan.bed	5702	cistrome_epigenome VCaP H3K27me3_208	cistrome_epigenome VCaP H3K27me3	0.00785916	0.213259	0.671092
68	demeth_ccle.bed	2110	sheffield_dnase	3.90461	2.9946	18	69	199	477	477	248	108	981	17628	Epithelial						2142.bed	1960	Epithelial_2110	Epithelial	0.000124562	0.0054374	2.26461
69	demeth_ccle.bed	2041	sheffield_dnase	4.77001	3.93809	16	59	162	525	525	249	73	983	17663	DNase Weak CD14						2055.bed	54749	DNase Weak CD14_2041	DNase Weak CD14	1.69819e-05	0.000866941	3.06201
70	demeth_ccle.bed	2799	sheffield_dnase	5.10309	4.83269	14	56	141	557	557	251	52	985	17684	Brain						756.bed	17285	Brain_2799	Brain	7.88692e-06	0.000424204	3.37243
71	demeth_ccle.bed	1149	sheffield_dnase	6.16148	7.68842	12	50	104	607	607	254	28	987	17708	Brain						1003.bed	33665	Brain_1149	Brain	6.89476e-07	4.15341e-05	4.3816
72	demeth_ccle.bed	2646	sheffield_dnase	1.1572	1.28498	45	196	333	246	333	258	628	954	17108	Weak stem plus others						559.bed	1181	Weak stem plus others_2646	Weak stem plus others	0.0696305	1	0
73	demeth_ccle.bed	2685	sheffield_dnase	2.62442	2.10594	21	94	249	436	436	260	179	978	17557	Liver;Brain						606.bed	2873	Liver;Brain_2685	Liver;Brain	0.00237457	0.0760872	1.11869
74	demeth_ccle.bed	2522	sheffield_dnase	3.94627	3.45057	15	68	180	536	536	261	78	984	17658	Weak stem specific						407.bed	1714	Weak stem specific_2522	Weak stem specific	0.00011317	0.00501277	2.29992
75	demeth_ccle.bed	2523	sheffield_dnase	6.18545	10.5355	10	49	72	666	666	262	17	989	17719	sheffield_dnase						409.bed	38602	sheffield_dnase_2523	sheffield_dnase	6.52452e-07	4.01058e-05	4.39679
76	demeth_ccle.bed	2395	sheffield_dnase	3.8393	3.36393	15	71	183	536	536	263	80	984	17656	Stem						253.bed	574	Stem_2395	Stem	0.000144778	0.00614186	2.2117
77	demeth_ccle.bed	1150	sheffield_dnase	6.01479	9.9499	10	51	76	666	666	264	18	989	17718	Brain						1004.bed	3659	Brain_1150	Brain	9.66522e-07	5.59839e-05	4.25194
78	demeth_ccle.bed	2721	sheffield_dnase	6.01479	9.9499	10	51	76	666	666	264	18	989	17718	Stem;Brain						652.bed	151	Stem;Brain_2721	Stem;Brain	9.66522e-07	5.59839e-05	4.25194
79	demeth_ccle.bed	219	cistrome_epigenome	2.90374	2.41004	18	84	233	477	477	265	134	981	17602	cistrome_epigenome VCaP H3K9me3	VCaP	prostate	H3K9me3	regular medium		Human_VCaP_H3K9me3_regular-medium_Chinnaiyan.bed	5404	cistrome_epigenome VCaP H3K9me3_219	cistrome_epigenome VCaP H3K9me3	0.00124814	0.0442509	1.35408
80	demeth_ccle.bed	3010	ucsc_features	0.115912	0.947888	226	398	372	28	398	266	4181	773	13555	UCSC Simple repeats						simpleRepeat.bed	962714	UCSC Simple repeats_3010	UCSC Simple repeats	0.765751	1	0
81	demeth_ccle.bed	1257	sheffield_dnase	2.29791	2.03956	19	103	256	459	459	273	167	980	17569	Primitive;Hematopoietic;Stem;Liver;Endothelial;Prostate;Bone;Brain						1125.bed	399	Primitive;Hematopoietic;Stem;Liver;Endothelial;Prostate;Bone;Brain_1257	Primitive;Hematopoietic;Stem;Liver;Endothelial;Pro	0.00503603	0.147267	0.831894
82	demeth_ccle.bed	2521	sheffield_dnase	4.04244	4.69004	11	66	144	631	631	280	42	988	17694	sheffield_dnase						406.bed	11952	sheffield_dnase_2521	sheffield_dnase	9.06912e-05	0.00413881	2.38312
83	demeth_ccle.bed	2723	sheffield_dnase	3.53778	4.01846	11	79	158	631	631	289	49	988	17687	sheffield_dnase						655.bed	15140	sheffield_dnase_2723	sheffield_dnase	0.00028988	0.0110521	1.95655
84	demeth_ccle.bed	2601	sheffield_dnase	3.9883	5.11259	10	67	138	666	666	290	35	989	17701	Stem						5.bed	330	Stem_2601	Stem	0.000102732	0.00461833	2.33552
85	demeth_ccle.bed	1324	sheffield_dnase	2.32348	2.36394	14	102	237	557	557	299	106	985	17630	sheffield_dnase						1208.bed	4604	sheffield_dnase_1324	sheffield_dnase	0.0047481	0.140209	0.853226
86	demeth_ccle.bed	468	encode_tfbs	0.279596	0.99823	60	350	366	190	366	302	1067	939	16669	ChIP HepG2 EZH2_(39875)	HepG2		EZH2_(39875)	None		wgEncodeAwgTfbsBroadHepg2Ezh239875UniPk.narrowPeak	3286	ChIP HepG2 EZH2_(39875)_468	ChIP HepG2 EZH2_(39875)	0.525296	1	0
87	demeth_ccle.bed	2037	sheffield_dnase	4.64337	11.3665	7	62	70	781	781	304	11	992	17725	Stem						205.bed	5301	Stem_2037	Stem	2.27316e-05	0.00110431	2.95691
88	demeth_ccle.bed	1617	sheffield_dnase	0.969207	1.29194	31	232	332	347	347	304	429	968	17307	Weak Ostoblast						1524.bed	1354	Weak Ostoblast_1617	Weak Ostoblast	0.107348	1	0
89	demeth_ccle.bed	2435	sheffield_dnase	4.46423	10.4191	7	64	73	781	781	306	12	992	17724	Stem						304.bed	6086	Stem_2435	Stem	3.43374e-05	0.00161601	2.79156
90	demeth_ccle.bed	179	cistrome_epigenome	0.000846299	0.827053	591	520	388	10	520	306	11290	408	6446	cistrome_epigenome MCF-7 H3K4me1	MCF-7	breast	H3K4me1	E2(3hr)		Human_MCF-7_H3K4me1_E2-3hr_Liu.bed	95807	cistrome_epigenome MCF-7 H3K4me1_179	cistrome_epigenome MCF-7 H3K4me1	0.998053	1	0
91	demeth_ccle.bed	2039	sheffield_dnase	2.65157	3.02649	11	93	198	631	631	307	65	988	17671	Fibrobl specific						2052.bed	25640	Fibrobl specific_2039	Fibrobl specific	0.00223065	0.0722441	1.1412
92	demeth_ccle.bed	2477	sheffield_dnase	1.59013	1.75741	17	130	292	502	502	308	173	982	17563	Stem;Brain						353.bed	385	Stem;Brain_2477	Stem;Brain	0.0256963	0.595364	0.225218
93	demeth_ccle.bed	1154	sheffield_dnase	3.35659	4.59693	9	80	146	700	700	309	35	990	17701	Brain;Stem;Epithelial						101.bed	152	Brain;Stem;Epithelial_1154	Brain;Stem;Epithelial	0.000439954	0.0165643	1.78083
94	demeth_ccle.bed	1824	sheffield_dnase	1.8852	2.06903	14	118	251	557	557	309	121	985	17615	Weak						1758.bed	4726	Weak_1824	Weak	0.0130255	0.332483	0.478231
95	demeth_ccle.bed	1613	sheffield_dnase	2.99822	4.0215	9	83	157	700	700	313	40	990	17696	Muscle						1520.bed	4246	Muscle_1613	Muscle	0.00100411	0.0364382	1.43844
96	demeth_ccle.bed	803	encode_tfbs	0.00765625	0.822147	129	485	390	69	485	315	2710	870	15026	ChIP H1-hESC CtBP2	H1-hESC		CtBP2	None		wgEncodeAwgTfbsSydhH1hescCtbp2UcdUniPk.narrowPeak	7089	ChIP H1-hESC CtBP2_803	ChIP H1-hESC CtBP2	0.982525	1	0
97	demeth_ccle.bed	2574	sheffield_dnase	1.66254	1.92485	14	125	269	557	557	317	130	985	17606	sheffield_dnase						466.bed	8903	sheffield_dnase_2574	sheffield_dnase	0.0217502	0.524092	0.280592
98	demeth_ccle.bed	2802	sheffield_dnase	1.27367	1.59016	17	153	306	502	502	320	191	982	17545	Liver						759.bed	8770	Liver_2802	Liver	0.0532514	0.873203	0.0588847
99	demeth_ccle.bed	2000	sheffield_dnase	2.41623	2.97847	10	100	200	666	666	322	60	989	17676	Epithelial						1990.bed	7043	Epithelial_2000	Epithelial	0.003835	0.11551	0.93738
100	demeth_ccle.bed	2257	sheffield_dnase	2.11854	2.52026	11	109	227	631	631	322	78	988	17658	sheffield_dnase						2327.bed	4681	sheffield_dnase_2257	sheffield_dnase	0.00761132	0.210324	0.677111
101	demeth_ccle.bed	1278	sheffield_dnase	3.6171	8.92263	6	76	80	819	819	325	12	993	17724	Brain						1153.bed	3997	Brain_1278	Brain	0.00024149	0.00953958	2.02047
102	demeth_ccle.bed	2917	sheffield_dnase	2.52208	3.3496	9	98	185	700	700	328	48	990	17688	sheffield_dnase						908.bed	15404	sheffield_dnase_2917	sheffield_dnase	0.00300554	0.0921579	1.03547
103	demeth_ccle.bed	2025	sheffield_dnase	2.24122	2.79172	10	106	217	666	666	330	64	989	17672	Stem						203.bed	270	Stem_2025	Stem	0.0057382	0.163052	0.787675
104	demeth_ccle.bed	434	encode_segmentation	0.0962788	0.895508	56	411	379	210	411	333	1103	943	16633	CTCF Segments	Hepg2				ENCODE segmentation	Hepg2_CTCF.bed	72023	CTCF Segments_434	CTCF Segments	0.801164	1	0
105	demeth_ccle.bed	2913	sheffield_dnase	2.90351	4.99816	7	85	140	781	781	335	25	992	17711	Brain						902.bed	464	Brain_2913	Brain	0.00124878	0.0442509	1.35408
106	demeth_ccle.bed	2396	sheffield_dnase	3.09263	6.68988	6	82	111	819	819	337	16	993	17720	Stem						254.bed	1944	Stem_2396	Stem	0.000807914	0.0296761	1.52759
107	demeth_ccle.bed	1405	sheffield_dnase	1.39592	1.79946	13	143	283	584	584	337	129	986	17607	Brain;Stem;Fibroblast;Endothelial						1304.bed	261	Brain;Stem;Fibroblast;Endothelial_1405	Brain;Stem;Fibroblast;Endothelial	0.0401866	0.846447	0.0724003
108	demeth_ccle.bed	3004	ucsc_features	2.67665e-07	0.702829	705	587	418	8	587	338	13716	294	4020	UCSC LaminBq						laminB1.bed	2859884	UCSC LaminBq_3004	UCSC LaminBq	0.999999	1	0
109	demeth_ccle.bed	3007	ucsc_features	0.448857	1.08368	33	326	356	335	356	339	542	966	17194	UCSC Nested repeats						nestedRepeats.bed	575600	UCSC Nested repeats_3007	UCSC Nested repeats	0.355748	1	0
110	demeth_ccle.bed	2701	sheffield_dnase	3.24395	9.90491	5	81	78	862	862	340	9	994	17727	Weak CD14 specific						626.bed	41471	Weak CD14 specific_2701	Weak CD14 specific	0.000570226	0.0212039	1.67358
111	demeth_ccle.bed	2896	sheffield_dnase	1.36852	1.83073	12	145	277	607	607	343	117	987	17619	Weak PA-TU-8988T specific						881.bed	10662	Weak PA-TU-8988T specific_2896	Weak PA-TU-8988T specific	0.0428037	0.873203	0.0588847
112	demeth_ccle.bed	1194	sheffield_dnase	0.259099	0.988879	37	357	367	304	367	343	664	962	17072	Weak SK-N-SH_RA specific						1054.bed	1361	Weak SK-N-SH_RA specific_1194	Weak SK-N-SH_RA specific	0.550682	1	0
113	demeth_ccle.bed	1733	sheffield_dnase	1.43624	1.9439	11	135	266	631	631	344	101	988	17635	DNase Osteoblast specific						1652.bed	18743	DNase Osteoblast specific_1733	DNase Osteoblast specific	0.0366232	0.788535	0.103179
114	demeth_ccle.bed	1340	sheffield_dnase	0.85531	1.33971	19	244	329	459	459	344	253	980	17483	Primitive;Hematopoietic;Endothelial						1225.bed	1768	Primitive;Hematopoietic;Endothelial_1340	Primitive;Hematopoietic;Endothelial	0.139537	1	0
115	demeth_ccle.bed	1217	sheffield_dnase	2.51869	4.16424	7	99	154	781	781	345	30	992	17706	sheffield_dnase						1079.bed	6152	sheffield_dnase_1217	sheffield_dnase	0.00302909	0.0921579	1.03547
116	demeth_ccle.bed	1304	sheffield_dnase	3.60723	23.7547	4	77	38	923	923	346	3	995	17733	Brain						1184.bed	16108	Brain_1304	Brain	0.000247041	0.00953958	2.02047
117	demeth_ccle.bed	1666	sheffield_dnase	3.60723	23.7547	4	77	38	923	923	346	3	995	17733	Stem;Brain						158.bed	202	Stem;Brain_1666	Stem;Brain	0.000247041	0.00953958	2.02047
118	demeth_ccle.bed	2727	sheffield_dnase	2.12716	3.10413	8	108	194	737	737	346	46	991	17690	sheffield_dnase						660.bed	7075	sheffield_dnase_2727	sheffield_dnase	0.00746169	0.208098	0.681731
119	demeth_ccle.bed	364	codex	0.173083	0.93835	39	378	373	291	378	347	736	960	17000	K562 erythrocytic leukaemia cells (ATCC CCL-243) were grown according to standar	Erythrocytic leukaemia cells		REST		GSE32509	GSM831015_REST.bed	5610	K562 erythrocytic leukaemia cells (ATCC CCL-243) were grown according to standar_364	K562 erythrocytic leukaemia cells (ATCC CCL-243) w	0.671301	1	0
120	demeth_ccle.bed	266	codex	0.764826	1.29304	19	261	331	459	459	350	262	980	17474	codex Embryonic Stem Cell NANOG	Embryonic Stem Cell		NANOG		GSE46130	GSM1124071_NANOG.bed	18537	codex Embryonic Stem Cell NANOG_266	codex Embryonic Stem Cell NANOG	0.17186	1	0
121	demeth_ccle.bed	599	encode_tfbs	0.0206488	0.805891	60	468	393	190	468	350	1303	939	16433	ChIP H1-hESC NRSF	H1-hESC		NRSF	None		wgEncodeAwgTfbsHaibH1hescNrsfV0416102UniPk.narrowPeak	13286	ChIP H1-hESC NRSF_599	ChIP H1-hESC NRSF	0.953567	1	0
122	demeth_ccle.bed	2940	sheffield_dnase	2.812	7.42892	5	88	105	862	862	352	12	994	17724	Weak Endothelial and Htr8						934.bed	29710	Weak Endothelial and Htr8_2940	Weak Endothelial and Htr8	0.00154172	0.0527687	1.27762
123	demeth_ccle.bed	1980	sheffield_dnase	3.8205		3	72	1	1007	1007	360	0	996	17736	Stem;Epithelial						1968.bed	306	Stem;Epithelial_1980	Stem;Epithelial	0.000151182	0.0062378	2.20497
124	demeth_ccle.bed	2429	sheffield_dnase	3.8205		3	72	1	1007	1007	360	0	996	17736	Stem						3.bed	1198	Stem_2429	Stem	0.000151182	0.0062378	2.20497
125	demeth_ccle.bed	1203	sheffield_dnase	2.70759	10.1787	4	90	74	923	923	362	7	995	17729	Brain;Liver						1065.bed	194	Brain;Liver_1203	Brain;Liver	0.00196071	0.0648975	1.18777
126	demeth_ccle.bed	2878	sheffield_dnase	2.70759	10.1787	4	90	74	923	923	362	7	995	17729	Liver;Epithelial						862.bed	31688	Liver;Epithelial_2878	Liver;Epithelial	0.00196071	0.0648975	1.18777
127	demeth_ccle.bed	1473	sheffield_dnase	1.00189	1.53537	13	206	308	584	584	366	151	986	17585	Hematopoietic;Primitive;Fibroblast;Stem;Liver;Epithelial;Endothelial;Bone;Brain						1374.bed	197	Hematopoietic;Primitive;Fibroblast;Stem;Liver;Epithelial;Endothelial;Bone;Brain_1473	Hematopoietic;Primitive;Fibroblast;Stem;Liver;Epit	0.0995658	1	0
128	demeth_ccle.bed	448	encode_segmentation	0.0061391	0.750079	57	490	405	204	490	366	1324	942	16412	CTCF Segments	K562				ENCODE segmentation	K562_CTCF.bed	70842	CTCF Segments_448	CTCF Segments	0.985964	1	0
129	demeth_ccle.bed	1976	sheffield_dnase	2.27934	5.24148	5	105	137	862	862	368	17	994	17719	Skin;Hematopoietic						1963.bed	9751	Skin;Hematopoietic_1976	Skin;Hematopoietic	0.00525608	0.150775	0.821672
130	demeth_ccle.bed	1971	sheffield_dnase	2.10974	4.69001	5	110	145	862	862	372	19	994	17717	Weak HCF						1955.bed	12534	Weak HCF_1971	Weak HCF	0.0077671	0.212677	0.672279
131	demeth_ccle.bed	1368	sheffield_dnase	0.181293	0.936146	28	376	374	368	376	373	530	971	17206	SK-N-SH_RA						1255.bed	2013	SK-N-SH_RA_1368	SK-N-SH_RA	0.65873	1	0
132	demeth_ccle.bed	2834	sheffield_dnase	2.8558	26.6824	3	86	36	1007	1007	376	2	996	17734	Stem and Medullo specific						801.bed	181	Stem and Medullo specific_2834	Stem and Medullo specific	0.0013938	0.0482544	1.31646
133	demeth_ccle.bed	2914	sheffield_dnase	2.8558	26.6824	3	86	36	1007	1007	376	2	996	17734	Brain						903.bed	878	Brain_2914	Brain	0.0013938	0.0482544	1.31646
134	demeth_ccle.bed	2958	sheffield_dnase	2.40897	7.91758	4	101	103	923	923	376	9	995	17727	Brain						951.bed	853	Brain_2958	Brain	0.00389965	0.116295	0.93444
135	demeth_ccle.bed	1618	sheffield_dnase	1.11475	1.69109	11	197	299	631	631	376	116	988	17620	Bone						1525.bed	2723	Bone_1618	Bone	0.0767807	1	0
136	demeth_ccle.bed	420	encode_segmentation	5.44585e-05	0.644425	67	549	428	154	549	377	1780	932	15956	CTCF Segments	H1hesc				ENCODE segmentation	H1hesc_CTCF.bed	96433	CTCF Segments_420	CTCF Segments	0.999875	1	0
137	demeth_ccle.bed	2096	sheffield_dnase	2.28138	7.1229	4	104	107	923	923	378	10	995	17726	Brain						2123.bed	781	Brain_2096	Brain	0.00523142	0.150775	0.821672
138	demeth_ccle.bed	2484	sheffield_dnase	1.7352	3.14556	6	123	192	819	819	378	34	993	17702	sheffield_dnase						368.bed	10125	sheffield_dnase_2484	sheffield_dnase	0.0183992	0.450555	0.346252
139	demeth_ccle.bed	2606	sheffield_dnase	1.20469	1.81969	10	190	279	666	666	378	98	989	17638	Primitive;Stem;Liver						505.bed	275	Primitive;Stem;Liver_2606	Primitive;Stem;Liver	0.0624175	0.989481	0.00459259
140	demeth_ccle.bed	1182	sheffield_dnase	1.68591	3.05553	6	124	197	819	819	380	35	993	17701	Stem						104.bed	1004	Stem_1182	Stem	0.0206106	0.500639	0.300476
141	demeth_ccle.bed	1229	sheffield_dnase	2.57234	17.7931	3	95	40	1007	1007	381	3	996	17733	Fibroblast;Muscle;Skin;Brain;Epithelial;Endothelial;Bone						1093.bed	122	Fibroblast;Muscle;Skin;Brain;Epithelial;Endothelial;Bone_1229	Fibroblast;Muscle;Skin;Brain;Epithelial;Endothelia	0.00267705	0.0839925	1.07576
142	demeth_ccle.bed	1560	sheffield_dnase	2.57234	17.7931	3	95	40	1007	1007	381	3	996	17733	Fibroblast;Muscle;Primitive;Brain;Epithelial;Endothelial;Cervix;Skin;Stem;Bone;L						1465.bed	118	Fibroblast;Muscle;Primitive;Brain;Epithelial;Endothelial;Cervix;Skin;Stem;Bone;L_1560	Fibroblast;Muscle;Primitive;Brain;Epithelial;Endot	0.00267705	0.0839925	1.07576
143	demeth_ccle.bed	1243	sheffield_dnase	0.989462	1.59421	11	207	305	631	631	381	123	988	17613	Stem;Liver;Brain						1108.bed	345	Stem;Liver;Brain_1243	Stem;Liver;Brain	0.102456	1	0
144	demeth_ccle.bed	1294	sheffield_dnase	1.27292	1.95713	9	184	263	700	700	382	82	990	17654	Epithelial;Fibroblast;Brain;Hematopoietic;Primitive;Stem;Endothelial;Muscle;Colo						1169.bed	268	Epithelial;Fibroblast;Brain;Hematopoietic;Primitive;Stem;Endothelial;Muscle;Colo_1294	Epithelial;Fibroblast;Brain;Hematopoietic;Primitiv	0.0533431	0.873203	0.0588847
145	demeth_ccle.bed	1242	sheffield_dnase	0.806973	1.40399	13	259	318	584	584	387	165	986	17571	Hematopoietic;Stem;Brain						1107.bed	283	Hematopoietic;Stem;Brain_1242	Hematopoietic;Stem;Brain	0.155965	1	0
146	demeth_ccle.bed	2853	sheffield_dnase	0.972682	1.58127	11	230	307	631	631	389	124	988	17612	Liver;Brain						822.bed	471	Liver;Brain_2853	Liver;Brain	0.106492	1	0
147	demeth_ccle.bed	1942	sheffield_dnase	1.96061	5.47958	4	116	134	923	923	391	13	995	17723	Fibroblast;Muscle;Brain;Hematopoietic;Primitive;Skin;Stem;Epithelial;Endothelial						191.bed	80	Fibroblast;Muscle;Brain;Hematopoietic;Primitive;Skin;Stem;Epithelial;Endothelial_1942	Fibroblast;Muscle;Brain;Hematopoietic;Primitive;Sk	0.0109494	0.281876	0.549942
148	demeth_ccle.bed	2439	sheffield_dnase	1.96061	5.47958	4	116	134	923	923	391	13	995	17723	Stem;Endothelial;Primitive						312.bed	120	Stem;Endothelial;Primitive_2439	Stem;Endothelial;Primitive	0.0109494	0.281876	0.549942
149	demeth_ccle.bed	1164	sheffield_dnase	1.58619	3.29886	5	131	187	862	862	393	27	994	17709	Stem;Brain;Muscle;Epithelial						102.bed	210	Stem;Brain;Muscle;Epithelial_1164	Stem;Brain;Muscle;Epithelial	0.0259304	0.596201	0.224608
150	demeth_ccle.bed	265	codex	0.433925	1.11566	17	328	350	502	502	393	271	982	17465	codex Embryonic Stem Cell NANOG	Embryonic Stem Cell		NANOG		GSE46130	GSM1124070_NANOG.bed	13465	codex Embryonic Stem Cell NANOG_265	codex Embryonic Stem Cell NANOG	0.368193	1	0
151	demeth_ccle.bed	178	cistrome_epigenome	0	0.544185	322	711	451	19	711	394	8272	677	9464	cistrome_epigenome MCF-7 H3K4me1	MCF-7	breast	H3K4me1	DMSO(3hr)		Human_MCF-7_H3K4me1_DMSO-3hr_Liu.bed	127623	cistrome_epigenome MCF-7 H3K4me1_178	cistrome_epigenome MCF-7 H3K4me1	1	1	0
152	demeth_ccle.bed	1343	sheffield_dnase	2.16018	10.6778	3	107	71	1007	1007	395	5	996	17731	sheffield_dnase						1230.bed	16657	sheffield_dnase_1343	sheffield_dnase	0.00691537	0.194664	0.710713
153	demeth_ccle.bed	2117	sheffield_dnase	2.54659		2	97	1	1094	1094	397	0	997	17736	Epithelial;Fibroblast						2153.bed	1376	Epithelial;Fibroblast_2117	Epithelial;Fibroblast	0.00284061	0.0882054	1.0545
154	demeth_ccle.bed	2640	sheffield_dnase	1.17662	1.95318	8	193	264	737	737	398	73	991	17663	Hematopoietic;Stem;Brain						553.bed	185	Hematopoietic;Stem;Brain_2640	Hematopoietic;Stem;Brain	0.0665857	1	0
155	demeth_ccle.bed	2072	sheffield_dnase	2.00152	8.89879	3	114	81	1007	1007	401	6	996	17730	Stem;Brain;Epithelial						2091.bed	204	Stem;Brain;Epithelial_2072	Stem;Brain;Epithelial	0.00996514	0.261	0.583359
156	demeth_ccle.bed	2918	sheffield_dnase	2.00152	8.89879	3	114	81	1007	1007	401	6	996	17730	Liver						909.bed	352	Liver_2918	Liver	0.00996514	0.261	0.583359
157	demeth_ccle.bed	171	cistrome_epigenome	1.08026	1.85118	8	199	274	737	737	403	77	991	17659	cistrome_epigenome LnCaP H3K9me3	LnCaP	prostate	H3K9me3	EtOH(16hr)		Human_LnCaP_H3K9me3_EtOH-16hr_Chinnaiyan.bed	2696	cistrome_epigenome LnCaP H3K9me3_171	cistrome_epigenome LnCaP H3K9me3	0.0831274	1	0
158	demeth_ccle.bed	443	encode_segmentation	0.238306	0.973821	18	362	370	477	477	403	328	981	17408	Promoter Flank Segments	Huvec				ENCODE segmentation	Huvec_PF.bed	11639	Promoter Flank Segments_443	Promoter Flank Segments	0.577689	1	0
159	demeth_ccle.bed	3002	ucsc_features	0	0.458008	784	711	492	7	711	403	15757	215	1979	UCSC Evo CpG islands						evoCpg.bed	129301	UCSC Evo CpG islands_3002	UCSC Evo CpG islands	1	1	0
160	demeth_ccle.bed	1407	sheffield_dnase	1.03514	1.80421	8	200	282	737	737	406	79	991	17657	Hematopoietic						1306.bed	297	Hematopoietic_1407	Hematopoietic	0.0922283	1	0
161	demeth_ccle.bed	55	cistrome_cistrome	1.95668e-08	0.534699	67	607	458	154	607	406	2102	932	15634	cistrome_cistrome MCF-7 ESR1	MCF-7	breast	ESR1	EtOH(6hr)		Human_MCF-7_ESR1_EtOH-6hr_Barton.bed	45356	cistrome_cistrome MCF-7 ESR1_55	cistrome_cistrome MCF-7 ESR1	1	1	0
162	demeth_ccle.bed	2081	sheffield_dnase	1.38911	2.87261	5	144	214	862	862	407	31	994	17705	Fibroblast						2104.bed	4622	Fibroblast_2081	Fibroblast	0.040822	0.853859	0.0686137
163	demeth_ccle.bed	370	codex	1.59665e-08	0.534591	68	610	459	151	610	407	2132	931	15604	K562 erythrocytic leukaemia cells (ATCC CCL-243) were grown according to standar	Embryonic Stem Cell		CHD1		GSE32509	GSM831025_CHD1.bed	4814	K562 erythrocytic leukaemia cells (ATCC CCL-243) were grown according to standar_370	K562 erythrocytic leukaemia cells (ATCC CCL-243) w	1	1	0
164	demeth_ccle.bed	442	encode_segmentation	1.92865e-16	0.518785	163	706	467	47	706	407	4845	836	12891	Enhancers Segments	Huvec				ENCODE segmentation	Huvec_E.bed	53526	Enhancers Segments_442	Enhancers Segments	1	1	0
165	demeth_ccle.bed	1777	sheffield_dnase	1.43864	3.56056	4	134	169	923	923	409	20	995	17716	Bone						1702.bed	730	Bone_1777	Bone	0.0364215	0.788535	0.103179
166	demeth_ccle.bed	115	cistrome_cistrome	1.15736	2.04453	7	195	254	781	781	410	61	992	17675	cistrome_cistrome T47D ESR1	T47D	breast	ESR1	EtOH(45min)		Human_T47D_ESR1_EtOH-45min_Liu.bed	3060	cistrome_cistrome T47D ESR1_115	cistrome_cistrome T47D ESR1	0.0696043	1	0
167	demeth_ccle.bed	22	cistrome_cistrome	0	0.477078	190	711	484	36	711	410	5851	809	11885	cistrome_cistrome HepG2 liver cells FoxA2	HepG2 liver cells	liver	FoxA2	No treatment		Human_HepG2-liver-cells_FoxA2_No-treatment_Wadelius.bed	9115	cistrome_cistrome HepG2 liver cells FoxA2_22	cistrome_cistrome HepG2 liver cells FoxA2	1	1	0
168	demeth_ccle.bed	3009	ucsc_features	0	0.428402	260	711	500	22	711	411	7998	739	9738	UCSC Repeat Masker						rmsk.bed	5298130	UCSC Repeat Masker_3009	UCSC Repeat Masker	1	1	0
169	demeth_ccle.bed	2844	sheffield_dnase	2.08516	35.5538	2	112	34	1094	1094	413	1	997	17735	Liver;Hematopoietic						813.bed	392	Liver;Hematopoietic_2844	Liver;Hematopoietic	0.00821947	0.219089	0.65938
170	demeth_ccle.bed	2979	sheffield_dnase	2.08516	35.5538	2	112	34	1094	1094	413	1	997	17735	HA-sp specific						977.bed	2457	HA-sp specific_2979	HA-sp specific	0.00821947	0.219089	0.65938
171	demeth_ccle.bed	1500	sheffield_dnase	1.743	6.67277	3	121	112	1007	1007	413	8	996	17728	Brain						1401.bed	3567	Brain_1500	Brain	0.0180716	0.446161	0.350508
172	demeth_ccle.bed	1772	sheffield_dnase	1.743	6.67277	3	121	112	1007	1007	413	8	996	17728	Weak Fibroblast; Muscle						1696.bed	3956	Weak Fibroblast; Muscle_1772	Weak Fibroblast; Muscle	0.0180716	0.446161	0.350508
173	demeth_ccle.bed	1982	sheffield_dnase	0.912216	1.61949	9	239	302	700	700	414	99	990	17637	sheffield_dnase						1970.bed	6794	sheffield_dnase_1982	sheffield_dnase	0.122401	1	0
174	demeth_ccle.bed	810	encode_tfbs	1.48314e-13	0.498026	102	676	475	92	676	414	3297	897	14439	ChIP H1-hESC Rad21	H1-hESC		Rad21	None		wgEncodeAwgTfbsSydhH1hescRad21IggrabUniPk.narrowPeak	55674	ChIP H1-hESC Rad21_810	ChIP H1-hESC Rad21	1	1	0
175	demeth_ccle.bed	1423	sheffield_dnase	1.24186	2.32357	6	187	238	819	819	415	46	993	17690	Fibroblast;Brain;Stem;Muscle;Epithelial;Liver;Endothelial;Skin;Bone						1322.bed	154	Fibroblast;Brain;Stem;Muscle;Epithelial;Liver;Endothelial;Skin;Bone_1423	Fibroblast;Brain;Stem;Muscle;Epithelial;Liver;Endo	0.0572976	0.922889	0.0348503
176	demeth_ccle.bed	239	codex	0	0.401312	355	711	518	16	711	415	10264	644	7472	Acute myelomonocytic leukaemia cell line carrying inv(16) translocation (CBFbeta	Leukaemia cell		CBFB		GSE46044	GSM1122302_CBFB.bed	18365	Acute myelomonocytic leukaemia cell line carrying inv(16) translocation (CBFbeta_239	Acute myelomonocytic leukaemia cell line carrying	1	1	0
177	demeth_ccle.bed	2264	sheffield_dnase	1.63533	5.93151	3	126	115	1007	1007	416	9	996	17727	Fibroblast;Muscle;Brain;Skin;Epithelial;Cervix;Liver;Endothelial;Prostate;Bone						2333.bed	316	Fibroblast;Muscle;Brain;Skin;Epithelial;Cervix;Liver;Endothelial;Prostate;Bone_2264	Fibroblast;Muscle;Brain;Skin;Epithelial;Cervix;Liv	0.0231562	0.553544	0.256848
178	demeth_ccle.bed	1951	sheffield_dnase	1.79974	17.7763	2	119	42	1094	1094	418	2	997	17734	sheffield_dnase						1921.bed	24857	sheffield_dnase_1951	sheffield_dnase	0.0158583	0.398044	0.400069
179	demeth_ccle.bed	2535	sheffield_dnase	1.79974	17.7763	2	119	42	1094	1094	418	2	997	17734	Muscle;Hematopoietic;Fibroblast;Epithelial;Brain						423.bed	129	Muscle;Hematopoietic;Fibroblast;Epithelial;Brain_2535	Muscle;Hematopoietic;Fibroblast;Epithelial;Brain	0.0158583	0.398044	0.400069
180	demeth_ccle.bed	604	encode_tfbs	0	0.462684	151	711	490	52	711	418	4929	848	12807	ChIP H1-hESC Rad21	H1-hESC		Rad21	None		wgEncodeAwgTfbsHaibH1hescRad21V0416102UniPk.narrowPeak	75680	ChIP H1-hESC Rad21_604	ChIP H1-hESC Rad21	1	1	0
181	demeth_ccle.bed	1595	sheffield_dnase	1.32652	3.23655	4	146	189	923	923	419	22	995	17714	Hematopoietic						15.bed	29117	Hematopoietic_1595	Hematopoietic	0.0471494	0.873203	0.0588847
182	demeth_ccle.bed	2692	sheffield_dnase	1.32652	3.23655	4	146	189	923	923	419	22	995	17714	K562 specific						615.bed	36694	K562 specific_2692	K562 specific	0.0471494	0.873203	0.0588847
183	demeth_ccle.bed	2073	sheffield_dnase	0.970997	1.73791	8	231	294	737	737	421	82	991	17654	Brain;Stem;Epithelial						2092.bed	203	Brain;Stem;Epithelial_2073	Brain;Stem;Epithelial	0.106906	1	0
184	demeth_ccle.bed	1218	sheffield_dnase	1.26127	2.61862	5	185	219	862	862	422	34	994	17702	Stem						108.bed	811	Stem_1218	Stem	0.0547931	0.89209	0.0495913
185	demeth_ccle.bed	1211	sheffield_dnase	0.810467	1.52643	9	258	309	700	700	422	105	990	17631	Brain;Primitive;Hematopoietic;Stem;Muscle;Fibroblast;Colon;Epithelial;Liver;Endo						1073.bed	158	Brain;Primitive;Hematopoietic;Stem;Muscle;Fibroblast;Colon;Epithelial;Liver;Endo_1211	Brain;Primitive;Hematopoietic;Stem;Muscle;Fibrobla	0.154715	1	0
186	demeth_ccle.bed	452	encode_segmentation	4.05223e-06	0.548292	45	572	449	246	572	422	1405	954	16331	Transcribed Segments	K562				ENCODE segmentation	K562_T.bed	336262	Transcribed Segments_452	Transcribed Segments	0.999991	1	0
187	demeth_ccle.bed	2089	sheffield_dnase	1.2749	3.09567	4	152	195	923	923	423	23	995	17713	Stem and Jurkat						2114.bed	11474	Stem and Jurkat_2089	Stem and Jurkat	0.0531005	0.873203	0.0588847
188	demeth_ccle.bed	454	encode_segmentation	0.285405	1.01471	14	349	364	557	557	423	245	985	17491	Weak Enhancer Segments	K562				ENCODE segmentation	K562_WE.bed	38829	Weak Enhancer Segments_454	Weak Enhancer Segments	0.518317	1	0
189	demeth_ccle.bed	2874	sheffield_dnase	1.5386	5.33899	3	132	136	1007	1007	425	10	996	17726	Medullo specific						856.bed	43589	Medullo specific_2874	Medullo specific	0.0289332	0.660203	0.180323
190	demeth_ccle.bed	1063	encode_tfbs	0	0.436256	130	711	498	67	711	425	4529	869	13207	ChIP H1-hESC CTCF	H1-hESC		CTCF	None		wgEncodeAwgTfbsUtaH1hescCtcfUniPk.narrowPeak	43247	ChIP H1-hESC CTCF_1063	ChIP H1-hESC CTCF	1	1	0
191	demeth_ccle.bed	2086	sheffield_dnase	1.59344	11.8532	2	127	66	1094	1094	429	3	997	17733	Jurkat						2110.bed	28735	Jurkat_2086	Jurkat	0.0255013	0.595364	0.225218
192	demeth_ccle.bed	2124	sheffield_dnase	1.59344	11.8532	2	127	66	1094	1094	429	3	997	17733	Hematopoietic						2165.bed	428	Hematopoietic_2124	Hematopoietic	0.0255013	0.595364	0.225218
193	demeth_ccle.bed	2128	sheffield_dnase	1.59344	11.8532	2	127	66	1094	1094	429	3	997	17733	Hematopoietic						2170.bed	730	Hematopoietic_2128	Hematopoietic	0.0255013	0.595364	0.225218
194	demeth_ccle.bed	2237	sheffield_dnase	0.0451606	0.76034	19	438	401	459	459	433	441	980	17295	Liver;Brain						2303.bed	1230	Liver;Brain_2237	Liver;Brain	0.901238	1	0
195	demeth_ccle.bed	460	encode_tfbs	0	0.40258	124	711	517	71	711	433	4618	875	13118	ChIP H1-hESC CTCF	H1-hESC		CTCF	None		wgEncodeAwgTfbsBroadH1hescCtcfUniPk.narrowPeak	66551	ChIP H1-hESC CTCF_460	ChIP H1-hESC CTCF	1	1	0
196	demeth_ccle.bed	592	encode_tfbs	0	0.413184	116	711	512	78	711	434	4279	883	13457	ChIP H1-hESC CTCF_(SC-5916)	H1-hESC		CTCF_(SC-5916)	None		wgEncodeAwgTfbsHaibH1hescCtcfsc5916V0416102UniPk.narrowPeak	54111	ChIP H1-hESC CTCF_(SC-5916)_592	ChIP H1-hESC CTCF_(SC-5916)	1	1	0
197	demeth_ccle.bed	373	codex	0	0.281302	456	711	582	11	711	435	13286	543	4450	K562 erythrocytic leukaemia cells (ATCC CCL-243) were grown according to standar	Embryonic Stem Cell		KDM4A		GSE32509	GSM831035_KDM4A.bed	20642	K562 erythrocytic leukaemia cells (ATCC CCL-243) were grown according to standar_373	K562 erythrocytic leukaemia cells (ATCC CCL-243) w	1	1	0
198	demeth_ccle.bed	447	encode_segmentation	0.326745	1.05536	12	341	359	607	607	436	202	987	17534	Weak Enhancer Segments	Huvec				ENCODE segmentation	Huvec_WE.bed	12143	Weak Enhancer Segments_447	Weak Enhancer Segments	0.471254	1	0
199	demeth_ccle.bed	1148	sheffield_dnase	1.43281	8.89088	2	136	83	1094	1094	438	4	997	17732	Fibroblast;Brain;Muscle;Bone						1002.bed	191	Fibroblast;Brain;Muscle;Bone_1148	Fibroblast;Brain;Muscle;Bone	0.0369135	0.788535	0.103179
200	demeth_ccle.bed	1854	sheffield_dnase	1.43281	8.89088	2	136	83	1094	1094	438	4	997	17732	Epithelial						1791.bed	5841	Epithelial_1854	Epithelial	0.0369135	0.788535	0.103179
201	demeth_ccle.bed	2214	sheffield_dnase	1.43281	8.89088	2	136	83	1094	1094	438	4	997	17732	Ewing sarcoma						2273.bed	1048	Ewing sarcoma_2214	Ewing sarcoma	0.0369135	0.788535	0.103179
202	demeth_ccle.bed	2628	sheffield_dnase	1.43281	8.89088	2	136	83	1094	1094	438	4	997	17732	Stem						54.bed	1334	Stem_2628	Stem	0.0369135	0.788535	0.103179
203	demeth_ccle.bed	2787	sheffield_dnase	1.43281	8.89088	2	136	83	1094	1094	438	4	997	17732	Endothelial;Primitive						739.bed	1514	Endothelial;Primitive_2787	Endothelial;Primitive	0.0369135	0.788535	0.103179
204	demeth_ccle.bed	2894	sheffield_dnase	1.43281	8.89088	2	136	83	1094	1094	438	4	997	17732	Endothelial						879.bed	2537	Endothelial_2894	Endothelial	0.0369135	0.788535	0.103179
205	demeth_ccle.bed	2655	sheffield_dnase	1.2981	4.10593	3	151	156	1007	1007	438	13	996	17723	Stem;Liver						57.bed	180	Stem;Liver_2655	Stem;Liver	0.050338	0.873203	0.0588847
206	demeth_ccle.bed	1822	sheffield_dnase	1.22593	2.96654	4	189	201	923	923	438	24	995	17712	sheffield_dnase						1755.bed	13056	sheffield_dnase_1822	sheffield_dnase	0.0594394	0.947257	0.0235323
207	demeth_ccle.bed	2018	sheffield_dnase	0.976819	1.94237	6	228	267	819	819	438	55	993	17681	Weak Ubiquitous						2022.bed	470	Weak Ubiquitous_2018	Weak Ubiquitous	0.105483	1	0
208	demeth_ccle.bed	2722	sheffield_dnase	0.976819	1.94237	6	228	267	819	819	438	55	993	17681	Brain						654.bed	289	Brain_2722	Brain	0.105483	1	0
209	demeth_ccle.bed	146	cistrome_cistrome	0.0227648	0.716572	21	465	415	436	465	439	516	978	17220	cistrome_cistrome metastatic prostate cancer tissue PolII	metastatic prostate cancer tissue	prostate	PolII	No treatment		Human_metastatic-prostate-cancer-tissue_PolII_No-treatment_Chinnaiyan.bed	13863	cistrome_cistrome metastatic prostate cancer tissue PolII_146	cistrome_cistrome metastatic prostate cancer tissu	0.948932	1	0
210	demeth_ccle.bed	415	encode_segmentation	0.0007307	0.605339	30	524	440	354	524	439	863	969	16873	Promoter Flank Segments	GM12878				ENCODE segmentation	Gm12878_PF.bed	38635	Promoter Flank Segments_415	Promoter Flank Segments	0.998319	1	0
211	demeth_ccle.bed	438	encode_segmentation	1.12175e-07	0.498931	45	596	474	246	596	439	1532	954	16204	Transcribed Segments	Hepg2				ENCODE segmentation	Hepg2_T.bed	222291	Transcribed Segments_438	Transcribed Segments	1	1	0
212	demeth_ccle.bed	23	cistrome_cistrome	0	0.270644	356	711	592	15	711	439	11913	643	5823	cistrome_cistrome HepG2 liver cells GABP	HepG2 liver cells	liver	GABP	No treatment		Human_HepG2-liver-cells_GABP_No-treatment_Wadelius.bed	24799	cistrome_cistrome HepG2 liver cells GABP_23	cistrome_cistrome HepG2 liver cells GABP	1	1	0
213	demeth_ccle.bed	199	cistrome_epigenome	0	0.318348	170	711	563	46	711	440	6949	829	10787	cistrome_epigenome NB4 cells H3K9me3	NB4 cells	hematopoietic stem cell	H3K9me3	ATRA(24hr)		Human_NB4-cells_H3K9me3_ATRA-24hr_Stunnenberg.bed	141588	cistrome_epigenome NB4 cells H3K9me3_199	cistrome_epigenome NB4 cells H3K9me3	1	1	0
214	demeth_ccle.bed	19	cistrome_cistrome	0.466013	1.19345	10	318	343	666	666	442	149	989	17587	cistrome_cistrome ECC-1 ESR1	ECC-1	uterus	ESR1	EtOH(45min)		Human_ECC-1_ESR1_EtOH-45min_Liu.bed	8848	cistrome_cistrome ECC-1 ESR1_19	cistrome_cistrome ECC-1 ESR1	0.341969	1	0
215	demeth_ccle.bed	463	encode_tfbs	0	0.287448	189	711	578	37	711	442	7947	810	9789	ChIP H1-hESC RBBP5_(A300-109A)	H1-hESC		RBBP5_(A300-109A)	None		wgEncodeAwgTfbsBroadH1hescRbbp5a300109aUniPk.narrowPeak	16151	ChIP H1-hESC RBBP5_(A300-109A)_463	ChIP H1-hESC RBBP5_(A300-109A)	1	1	0
216	demeth_ccle.bed	2962	sheffield_dnase	0.704637	1.46792	8	281	315	737	737	444	97	991	17639	sheffield_dnase						958.bed	9541	sheffield_dnase_2962	sheffield_dnase	0.197407	1	0
217	demeth_ccle.bed	419	encode_segmentation	0.448216	1.17751	10	327	346	666	666	446	151	989	17585	Weak Enhancer Segments	GM12878				ENCODE segmentation	Gm12878_WE.bed	48813	Weak Enhancer Segments_419	Weak Enhancer Segments	0.356274	1	0
218	demeth_ccle.bed	703	encode_tfbs	8.70225e-06	0.529807	36	563	461	313	563	446	1169	963	16567	ChIP PANC-1 NRSF	PANC-1		NRSF	None		wgEncodeAwgTfbsHaibPanc1NrsfPcr2xUniPk.narrowPeak	5507	ChIP PANC-1 NRSF_703	ChIP PANC-1 NRSF	0.99998	1	0
219	demeth_ccle.bed	427	encode_segmentation	1.98798e-06	0.513563	38	576	470	295	576	447	1268	961	16468	CTCF Segments	HeLa-S3				ENCODE segmentation	Helas3_CTCF.bed	78385	CTCF Segments_427	CTCF Segments	0.999995	1	0
220	demeth_ccle.bed	60	cistrome_cistrome	9.64327e-17	0.421235	78	707	507	127	707	447	2969	921	14767	cistrome_cistrome MCF-7 ESR1	MCF-7	breast	ESR1	full media		Human_MCF-7_ESR1_full-media_Hurtado.bed	40464	cistrome_cistrome MCF-7 ESR1_60	cistrome_cistrome MCF-7 ESR1	1	1	0
221	demeth_ccle.bed	707	encode_tfbs	8.21151e-09	0.473118	46	614	485	244	614	448	1642	953	16094	ChIP PFSK-1 NRSF	PFSK-1		NRSF	None		wgEncodeAwgTfbsHaibPfsk1NrsfPcr2xUniPk.narrowPeak	11390	ChIP PFSK-1 NRSF_707	ChIP PFSK-1 NRSF	1	1	0
222	demeth_ccle.bed	212	cistrome_epigenome	0	0.389593	90	711	524	109	711	448	3594	909	14142	cistrome_epigenome VCaP H3K4me1	VCaP	prostate	H3K4me1	regular medium		Human_VCaP_H3K4me1_regular-medium_Chinnaiyan.bed	63143	cistrome_epigenome VCaP H3K4me1_212	cistrome_epigenome VCaP H3K4me1	1	1	0
223	demeth_ccle.bed	1338	sheffield_dnase	1.30208	7.11067	2	148	108	1094	1094	450	5	997	17731	Primitive;Epithelial;Skin						1223.bed	151	Primitive;Epithelial;Skin_1338	Primitive;Epithelial;Skin	0.0498791	0.873203	0.0588847
224	demeth_ccle.bed	1615	sheffield_dnase	1.30208	7.11067	2	148	108	1094	1094	450	5	997	17731	Fibroblast;Muscle;Bone						1522.bed	337	Fibroblast;Muscle;Bone_1615	Fibroblast;Muscle;Bone	0.0498791	0.873203	0.0588847
225	demeth_ccle.bed	2779	sheffield_dnase	1.30208	7.11067	2	148	108	1094	1094	450	5	997	17731	CD14 specific						726.bed	3152	CD14 specific_2779	CD14 specific	0.0498791	0.873203	0.0588847
226	demeth_ccle.bed	441	encode_segmentation	8.12675e-06	0.524632	35	565	463	321	565	450	1148	964	16588	CTCF Segments	Huvec				ENCODE segmentation	Huvec_CTCF.bed	56516	CTCF Segments_441	CTCF Segments	0.999981	1	0
227	demeth_ccle.bed	180	cistrome_epigenome	3.81649e-05	0.53655	31	551	454	347	551	451	999	968	16737	cistrome_epigenome MCF-7 H3K4me1	MCF-7	breast	H3K4me1	No treatment		Human_MCF-7_H3K4me1_No-treatment_Brown.bed	2947	cistrome_epigenome MCF-7 H3K4me1_180	cistrome_epigenome MCF-7 H3K4me1	0.999912	1	0
228	demeth_ccle.bed	1409	sheffield_dnase	1.23078	3.81197	3	188	165	1007	1007	453	14	996	17722	Hematopoietic						1308.bed	340	Hematopoietic_1409	Hematopoietic	0.0587784	0.941705	0.0260852
229	demeth_ccle.bed	435	encode_segmentation	0	0.33501	104	711	556	91	711	453	4568	895	13168	Enhancers Segments	Hepg2				ENCODE segmentation	Hepg2_E.bed	47879	Enhancers Segments_435	Enhancers Segments	1	1	0
230	demeth_ccle.bed	1051	encode_tfbs	0	0.277278	124	711	583	71	711	455	5999	875	11737	ChIP Fibrobl CTCF	Fibrobl		CTCF	None		wgEncodeAwgTfbsUtaFibroblCtcfUniPk.narrowPeak	45978	ChIP Fibrobl CTCF_1051	ChIP Fibrobl CTCF	1	1	0
231	demeth_ccle.bed	1141	encode_tfbs	0	0.287188	119	711	579	76	711	455	5678	880	12058	ChIP SK-N-SH_RA CTCF	SK-N-SH_RA		CTCF	None		wgEncodeAwgTfbsUwSknshraCtcfUniPk.narrowPeak	46232	ChIP SK-N-SH_RA CTCF_1141	ChIP SK-N-SH_RA CTCF	1	1	0
232	demeth_ccle.bed	1155	sheffield_dnase	0.531796	1.29351	8	302	330	737	737	456	110	991	17626	DNase Liver						1010.bed	5929	DNase Liver_1155	DNase Liver	0.293903	1	0
233	demeth_ccle.bed	2745	sheffield_dnase	1.16854	3.55799	3	194	170	1007	1007	457	15	996	17721	Weak endothelial						687.bed	19554	Weak endothelial_2745	Weak endothelial	0.0678352	1	0
234	demeth_ccle.bed	422	encode_segmentation	0.509031	1.27027	8	304	334	737	737	458	112	991	17624	Promoter Flank Segments	H1hesc				ENCODE segmentation	H1hesc_PF.bed	33023	Promoter Flank Segments_422	Promoter Flank Segments	0.30972	1	0
235	demeth_ccle.bed	458	encode_tfbs	0.00366689	0.610791	20	497	438	446	497	460	574	979	17162	ChIP GM12878 EZH2_(39875)	GM12878		EZH2_(39875)	None		wgEncodeAwgTfbsBroadGm12878Ezh239875UniPk.narrowPeak	2472	ChIP GM12878 EZH2_(39875)_458	ChIP GM12878 EZH2_(39875)	0.991592	1	0
[truncated: 2,776 more rows]

## Sheet: LOLA_roadmap
Supplementary Table S6c: LOLA roadmap output
Region enrichment analysis with ENCODE Roadmap Epigenomics sets
[truncated: 1,111 more rows]

## Sheet: Chromatin_TERTp_differences
Supplementary Table S6d: Associations between TERTp status and chromatin profiling
[truncated: 44 more rows]

[truncated: 1 more sheets: H3K9ac1K14ac0_CGI_ASM]
