# Supplementary material for: Integrated evaluation of telomerase activation and telomere maintenance across cancer cell lines
Source: eLife. 2021 Sep 6;10:e66198. doi: 10.7554/eLife.66198 (PMC8530513; doi:10.7554/eLife.66198)
Supplement: Supplementary file 7. [file elife-66198-supp7.xlsx]

## Sheet: CGI_TERTp_differences
Supplementary Table S7a: CGI methylation vs. TERTp status
Differences in methylation of CGIs in TERTp mutants and wildtype contexts
CGI_ID	Median_TERTp_WT_methylation	Median_TERTp_mutant_methylation	WT_vs_mutant_difference	Difference_rank	Rank_biserial_correlation	Rank_biserial_correlation_rank	n_TERTp_WT_cell_lines	n_TERTp_mutant_cell_lines	P_value	-log10_p_value	Signed_-log10_p_value	Signed_p_value_rank	Q_value	CGI_chromosome	CGI_start_position	CGI_end_position	Distance_to_telomere	Telomere_proximal	HepG2_PRC2
chr10_100028204_100028508	0.0672273	0.0755925	0.00836515	11105	0.151717	11435	506	372	0.000120397	3.91938	3.91938	11435	0.000405928	chr10	100028204	100028508	35506239	FALSE	FALSE
chr10_100993820_100994188	0.142299	0.134338	-0.00796103	2405	-0.0618917	5121	506	372	0.116745	0.932763	-0.932763	5121	0.177801	chr10	100993820	100994188	34540559	FALSE	TRUE
chr10_101089010_101090655	0.395578	0.407483	0.0119049	11386	0.0886672	10285.5	506	372	0.0246246	1.60863	1.60863	10285.5	0.0472908	chr10	101089010	101090655	34444092	FALSE	FALSE
chr10_101190451_101190925	0.0377333	0.0378053	7.19093e-05	7931	-0.00773514	7828	506	372	0.844671	0.0733122	-0.0733122	7828	0.880619	chr10	101190451	101190925	34343822	FALSE	FALSE
chr10_101281181_101282116	0.519528	0.429703	-0.0898246	419	-0.158071	1793	506	372	6.1661e-05	4.20999	-4.20999	1793	0.000218385	chr10	101281181	101282116	34252631	FALSE	FALSE
chr10_101287162_101287920	0.349044	0.291687	-0.0573572	773	-0.128373	2442	506	372	0.00113934	2.94335	-2.94335	2441	0.00310057	chr10	101287162	101287920	34246827	FALSE	TRUE
chr10_101292436_101292851	0.137219	0.132059	-0.00516011	2700	-0.0498002	5783.5	506	372	0.206908	0.684222	-0.684222	5783.5	0.285815	chr10	101292436	101292851	34241896	FALSE	TRUE
chr10_101294443_101297263	0.261622	0.305808	0.0441866	12590	0.099303	10489	506	372	0.011842	1.92658	1.92658	10489	0.0248141	chr10	101294443	101297263	34237484	FALSE	TRUE
chr10_101379708_101381445	0.044982	0.0444048	-0.000577167	5468	-0.0339793	6597	506	372	0.389176	0.409854	-0.409854	6597	0.479637	chr10	101379708	101381445	34153302	FALSE	FALSE
chr10_101418868_101419589	0.03686	0.0373814	0.000521403	8935	0.0478558	9484	506	372	0.225195	0.647441	0.647441	9484	0.306821	chr10	101418868	101419589	34115158	FALSE	FALSE
chr10_101491680_101492232	0.0400721	0.0400357	-3.64035e-05	7530	-0.0428833	6139	506	372	0.277128	0.557319	-0.557319	6139	0.363714	chr10	101491680	101492232	34042515	FALSE	FALSE
chr10_101945571_101945907	0.0200713	0.0200141	-5.72372e-05	7449	0.0107474	8476	506	372	0.785414	0.104901	0.104901	8476	0.832356	chr10	101945571	101945907	33588840	FALSE	FALSE
chr10_101989127_101989533	0.0428842	0.0426624	-0.00022183	6818	-0.0493221	5800	506	372	0.211302	0.675097	-0.675097	5800	0.290876	chr10	101989127	101989533	33545214	FALSE	FALSE
chr10_102027099_102027490	0.0302473	0.0304751	0.000227766	8389	-0.0129734	7604	506	372	0.74239	0.129368	-0.129368	7604	0.798313	chr10	102027099	102027490	33507257	FALSE	FALSE
chr10_102046142_102046632	0.0423753	0.042441	6.57253e-05	7911	-0.0203313	7286	506	372	0.606423	0.217225	-0.217225	7286	0.681703	chr10	102046142	102046632	33488115	FALSE	FALSE
chr10_102106182_102107722	0.0528898	0.0429155	-0.00997434	2246	-0.271718	587	506	372	5.70285e-12	11.2439	-11.2439	587	6.35333e-11	chr10	102106182	102107722	33427025	FALSE	FALSE
chr10_102133021_102133557	0.0546439	0.053606	-0.0010379	4422	-0.0371775	6435	506	372	0.346103	0.460794	-0.460794	6435	0.436358	chr10	102133021	102133557	33401190	FALSE	FALSE
chr10_102241980_102242559	0.0482184	0.0496198	0.00140147	9693	0.134653	11147.5	506	372	0.000642974	3.19181	3.19181	11147.5	0.00185485	chr10	102241980	102242559	33292188	FALSE	FALSE
chr10_102279162_102279730	0.473389	0.368529	-0.104861	319	-0.191859	1327.5	506	372	1.15759e-06	5.93645	-5.93645	1327.5	5.47169e-06	chr10	102279162	102279730	33255017	FALSE	FALSE
chr10_102414425_102416315	0.119231	0.128268	0.00903728	11178	0.000276255	8112	506	372	0.994521	0.00238618	0.00238618	8112	0.99658	chr10	102414425	102416315	33118432	FALSE	TRUE
chr10_102419147_102419668	0.459376	0.364486	-0.0948892	381	-0.0926622	3666	506	372	0.0188491	1.72471	-1.72471	3665	0.0372446	chr10	102419147	102419668	33115079	FALSE	TRUE
chr10_102489343_102491011	0.0809227	0.0973915	0.0164688	11674	0.115464	10786	506	372	0.00342869	2.46487	2.46487	10786	0.00831665	chr10	102489343	102491011	33043736	FALSE	FALSE
chr10_102497154_102497675	0.21611	0.0851664	-0.130944	198	-0.324631	331	506	372	1.90307e-16	15.7205	-15.7205	331	4.06639e-15	chr10	102497154	102497675	33037072	FALSE	TRUE
chr10_102501700_102502232	0.13102	0.106795	-0.0242245	1534	-0.200391	1224	506	372	3.79394e-07	6.42091	-6.42091	1224	1.93949e-06	chr10	102501700	102502232	33032515	FALSE	TRUE
chr10_102503913_102506146	0.0671051	0.0491312	-0.0179739	1783	-0.225966	964	506	372	1.02077e-08	7.99107	-7.99107	964	6.75213e-08	chr10	102503913	102506146	33028601	FALSE	TRUE
chr10_102507482_102509646	0.191586	0.141217	-0.0503688	883	-0.280962	525	506	372	1.07007e-12	11.9706	-11.9706	525	1.33729e-11	chr10	102507482	102509646	33025101	FALSE	TRUE
chr10_102586125_102588109	0.198199	0.161673	-0.0365261	1146	-0.103447	3251	506	372	0.00874541	2.05822	-2.05822	3250	0.0190167	chr10	102586125	102588109	32946638	FALSE	FALSE
chr10_102746533_102747501	0.0259603	0.026146	0.000185627	8285	0.0160122	8652	506	372	0.684954	0.164339	0.164339	8652	0.749824	chr10	102746533	102747501	32787246	FALSE	FALSE
chr10_102756834_102759798	0.0476508	0.0493181	0.00166729	9817	0.16077	11545	506	372	4.60605e-05	4.33667	4.33667	11545	0.000166129	chr10	102756834	102759798	32774949	FALSE	FALSE
chr10_102765205_102765448	0.914412	0.903479	-0.0109329	2169	-0.199084	1241	506	372	4.51411e-07	6.34543	-6.34543	1241	2.28267e-06	chr10	102765205	102765448	32769299	FALSE	FALSE
chr10_102778604_102778922	0.285353	0.277894	-0.0074583	2468	-0.0223235	7186.5	506	372	0.57161	0.2429	-0.2429	7186.5	0.650996	chr10	102778604	102778922	32755825	FALSE	FALSE
chr10_102790820_102791049	0.033117	0.0328126	-0.000304401	6483	-0.0700944	4700.5	506	372	0.075652	1.12118	-1.12118	4700.5	0.123165	chr10	102790820	102791049	32743698	FALSE	FALSE
chr10_102809887_102810282	0.0909128	0.0864719	-0.00444086	2814	0.0157147	8647	506	372	0.690503	0.160834	0.160834	8647	0.754862	chr10	102809887	102810282	32724465	FALSE	FALSE
chr10_102820488_102822874	0.287991	0.395497	0.107507	13233	0.339538	13297	506	372	7.57362e-18	17.1207	17.1207	13297	2.01571e-16	chr10	102820488	102822874	32711873	FALSE	FALSE
chr10_102825929_102827693	0.103675	0.111601	0.00792576	11069	0.119236	10852	506	372	0.00251076	2.60019	2.60019	10852	0.00629527	chr10	102825929	102827693	32707054	FALSE	FALSE
chr10_102891010_102891794	0.238834	0.0869778	-0.151856	139	-0.254622	720	506	372	1.09249e-10	9.96158	-9.96158	720	9.92619e-10	chr10	102891010	102891794	32642953	FALSE	FALSE
chr10_102893660_102895059	0.4243	0.419624	-0.00467676	2779	-0.0183284	7384	506	372	0.642346	0.192231	-0.192231	7384	0.712916	chr10	102893660	102895059	32639688	FALSE	TRUE
chr10_102896342_102896665	0.510348	0.478227	-0.0321212	1260	-0.0814846	4118.5	506	372	0.0389051	1.40999	-1.40999	4118.5	0.0700395	chr10	102896342	102896665	32638082	FALSE	TRUE
chr10_102905714_102906693	0.238507	0.162337	-0.0761697	528	-0.175868	1536	506	372	8.2939e-06	5.08124	-5.08124	1536	3.40271e-05	chr10	102905714	102906693	32628054	FALSE	TRUE
chr10_102975969_102978096	0.209421	0.170173	-0.039248	1092	-0.144789	2056	506	372	0.000242809	3.61473	-3.61473	2056	0.000766389	chr10	102975969	102978096	32556651	FALSE	TRUE
chr10_102982302_102983600	0.228335	0.21325	-0.0150841	1927	-0.0774895	4305	506	372	0.0495383	1.30506	-1.30506	4305	0.086093	chr10	102982302	102983600	32551147	FALSE	TRUE
chr10_102984182_102990063	0.24142	0.210022	-0.0313975	1280	-0.135089	2285.5	506	372	0.00061741	3.20943	-3.20943	2283.5	0.00178948	chr10	102984182	102990063	32544684	FALSE	TRUE
chr10_102996034_102996646	0.39817	0.351526	-0.0466445	951	-0.0323006	6680	506	372	0.413036	0.384012	-0.384012	6680	0.502867	chr10	102996034	102996646	32538101	FALSE	TRUE
chr10_103043990_103044480	0.530267	0.41369	-0.116577	259	-0.201209	1211	506	372	3.40096e-07	6.4684	-6.4684	1211	1.75249e-06	chr10	103043990	103044480	32490267	FALSE	TRUE
chr10_103113523_103114414	0.0390241	0.039193	0.000168867	8235	-0.0258405	7005.5	506	372	0.512582	0.290237	-0.290237	7005.5	0.597689	chr10	103113523	103114414	32420333	FALSE	FALSE
chr10_103347679_103348215	0.0744413	0.0736379	-0.000803426	4868	-0.0786476	4255	506	372	0.0462303	1.33507	-1.33507	4255	0.0810827	chr10	103347679	103348215	32186532	FALSE	FALSE
chr10_1033790_1034615	0.0484142	0.0481838	-0.000230361	6790	-0.0195822	7324.5	506	372	0.619753	0.207781	-0.207781	7324.5	0.693352	chr10	1033790	1034615	1033790	TRUE	FALSE
chr10_103535636_103536505	0.268816	0.265127	-0.00368851	2931	-0.0682349	4798.5	506	372	0.0837443	1.07704	-1.07704	4798.5	0.134227	chr10	103535636	103536505	31998242	FALSE	FALSE
chr10_103542711_103543290	0.0387	0.0391718	0.000471771	8859	0.0436164	9389.5	506	372	0.268997	0.570252	0.570252	9389.5	0.35521	chr10	103542711	103543290	31991457	FALSE	FALSE
chr10_103815502_103816105	0.0354277	0.0350172	-0.000410479	6056	-0.0691487	4743.5	506	372	0.079684	1.09863	-1.09863	4743.5	0.12877	chr10	103815502	103816105	31718642	FALSE	FALSE
chr10_103824894_103825778	0.0231963	0.0231706	-2.56654e-05	7569	0.0177866	8710	506	372	0.652215	0.185609	0.185609	8710	0.721623	chr10	103824894	103825778	31708969	FALSE	FALSE
chr10_103879633_103880628	0.038704	0.0385918	-0.000112161	7249	-0.055421	5505.5	506	372	0.160147	0.795481	-0.795481	5505	0.230236	chr10	103879633	103880628	31654119	FALSE	FALSE
chr10_103892659_103893590	0.0194174	0.0194727	5.53317e-05	7875	-0.0262442	6989.5	506	372	0.506014	0.295837	-0.295837	6989.5	0.591303	chr10	103892659	103893590	31641157	FALSE	FALSE
chr10_103911696_103912546	0.0589219	0.0653156	0.00639364	10920	0.270857	12915.5	506	372	6.64595e-12	11.1774	11.1774	12915.5	7.31379e-11	chr10	103911696	103912546	31622201	FALSE	FALSE
chr10_103985852_103986246	0.0310901	0.0407756	0.0096855	11233	0.238238	12609	506	372	1.55754e-09	8.80756	8.80756	12609	1.18075e-08	chr10	103985852	103986246	31548501	FALSE	FALSE
chr10_103990213_103991829	0.0608235	0.146793	0.0859698	13088	0.343757	13323	506	372	2.96483e-18	17.528	17.528	13323	8.56386e-17	chr10	103990213	103991829	31542918	FALSE	FALSE
chr10_104000254_104001741	0.221236	0.230278	0.00904204	11181	0.041332	9327.5	506	372	0.294881	0.530353	0.530353	9327.5	0.382419	chr10	104000254	104001741	31533006	FALSE	FALSE
chr10_104005139_104005592	0.038566	0.0382378	-0.000328179	6396	-0.087679	3832.5	506	372	0.0262701	1.58054	-1.58054	3831.5	0.0499832	chr10	104005139	104005592	31529155	FALSE	FALSE
chr10_104153729_104155557	0.0348651	0.0367268	0.00186173	9916	0.168685	11666	506	372	1.90793e-05	4.71944	4.71944	11666	7.3345e-05	chr10	104153729	104155557	31379190	FALSE	FALSE
chr10_104170168_104170872	0.240317	0.246663	0.00634581	10912	0.0303668	9054	506	372	0.441568	0.355002	0.355002	9054	0.529936	chr10	104170168	104170872	31363875	FALSE	TRUE
chr10_104178528_104179548	0.0863867	0.0619477	-0.024439	1522	-0.364508	182	506	372	2.49394e-20	19.6031	-19.6031	182	9.96191e-19	chr10	104178528	104179548	31355199	FALSE	FALSE
chr10_104180478_104182042	0.0637435	0.0669477	0.00320414	10353	0.223554	12439	506	372	1.46077e-08	7.83542	7.83542	12439	9.45941e-08	chr10	104180478	104182042	31352705	FALSE	FALSE
chr10_104191984_104192527	0.0315597	0.0313161	-0.000243619	6736	-0.0550278	5525	506	372	0.163133	0.787459	-0.787459	5525	0.233858	chr10	104191984	104192527	31342220	FALSE	FALSE
chr10_104210095_104210985	0.039787	0.042177	0.00239	10103	0.0842683	10198	506	372	0.0327	1.48545	1.48545	10198	0.0602866	chr10	104210095	104210985	31323762	FALSE	FALSE
chr10_104220983_104221287	0.0283126	0.0287663	0.000453725	8833	0.0397488	9293.5	506	372	0.313768	0.503391	0.503391	9293.5	0.402559	chr10	104220983	104221287	31313460	FALSE	FALSE
chr10_104263676_104264155	0.0358023	0.0363719	0.000569623	8999	0.00737388	8367	506	372	0.851845	0.0696396	0.0696396	8367	0.88646	chr10	104263676	104264155	31270592	FALSE	FALSE
chr10_104401821_104404968	0.0614964	0.0617394	0.00024303	8429	0.00372944	8246	506	372	0.924797	0.0339534	0.0339534	8246	0.943391	chr10	104401821	104404968	31129779	FALSE	FALSE
chr10_104473399_104474711	0.0383313	0.0378754	-0.000455976	5902	-0.07189	4601	506	372	0.0684544	1.1646	-1.1646	4601	0.113202	chr10	104473399	104474711	31060036	FALSE	FALSE
chr10_104629038_104629479	0.0671405	0.05922	-0.00792053	2410	-0.203632	1185	506	372	2.4543e-07	6.61007	-6.61007	1185	1.29321e-06	chr10	104629038	104629479	30905268	FALSE	FALSE
chr10_104677315_104679312	0.050355	0.0541402	0.00378524	10507	0.125622	10973	506	372	0.00145308	2.83771	2.83771	10973	0.00386204	chr10	104677315	104679312	30855435	FALSE	FALSE
chr10_104952242_104953232	0.0275382	0.0271257	-0.000412516	6049	-0.0629755	5070	506	372	0.110477	0.95673	-0.95673	5070	0.169801	chr10	104952242	104953232	30581515	FALSE	FALSE
chr10_105036628_105038084	0.248444	0.130431	-0.118014	246	-0.252763	737	506	372	1.4896e-10	9.82693	-9.82693	737	1.31635e-09	chr10	105036628	105038084	30496663	FALSE	TRUE
chr10_105110265_105111008	0.0853974	0.0777605	-0.00763682	2446	-0.164563	1694	506	372	3.03386e-05	4.518	-4.518	1694	0.000113129	chr10	105110265	105111008	30423739	FALSE	FALSE
chr10_105127580_105127824	0.0673966	0.066027	-0.00136967	4009	-0.0374113	6426	506	372	0.343079	0.464606	-0.464606	6426	0.433068	chr10	105127580	105127824	30406923	FALSE	FALSE
chr10_105155820_105156484	0.0329599	0.0320357	-0.000924163	4636	-0.105402	3180	506	372	0.00755351	2.12185	-2.12185	3179	0.0167421	chr10	105155820	105156484	30378263	FALSE	FALSE
chr10_105211950_105212306	0.034343	0.0465811	0.0122382	11407	0.21261	12284	506	372	7.09609e-08	7.14898	7.14898	12284	4.07506e-07	chr10	105211950	105212306	30322441	FALSE	FALSE
chr10_105232921_105233456	0.872533	0.896363	0.0238296	12004	0.105859	10621	506	372	0.00729689	2.13686	2.13686	10621	0.0162557	chr10	105232921	105233456	30301291	FALSE	TRUE
chr10_105253191_105254428	0.0356752	0.0352671	-0.000408083	6072	-0.0554741	5502	506	372	0.159747	0.796567	-0.796567	5502	0.229831	chr10	105253191	105254428	30280319	FALSE	TRUE
chr10_105614511_105615456	0.0435095	0.0459894	0.00247987	10137	0.112298	10740	506	372	0.00442468	2.35412	2.35412	10740	0.0104573	chr10	105614511	105615456	29919291	FALSE	FALSE
chr10_105881449_105881947	0.0276414	0.0276239	-1.7494e-05	7604	-0.0538484	5586	506	372	0.172341	0.76361	-0.76361	5586	0.245062	chr10	105881449	105881947	29652800	FALSE	FALSE
chr10_105991899_105992248	0.0276864	0.0277513	6.48424e-05	7908	0.000988142	8139.5	506	372	0.980126	0.00871811	0.00871811	8139.5	0.985729	chr10	105991899	105992248	29542499	FALSE	FALSE
chr10_106028542_106029047	0.0462746	0.0552049	0.0089303	11168	0.207871	12217	506	372	1.37461e-07	6.86182	6.86182	12217	7.53311e-07	chr10	106028542	106029047	29505700	FALSE	FALSE
chr10_106097595_106098556	0.0414671	0.0424804	0.00101326	9437	0.0170109	8686	506	372	0.666448	0.176234	0.176234	8686	0.733835	chr10	106097595	106098556	29436191	FALSE	FALSE
chr10_106399567_106402812	0.239317	0.0871633	-0.152153	138	-0.346636	234	506	372	1.55292e-18	17.8089	-17.8089	234	4.70636e-17	chr10	106399567	106402812	29131935	FALSE	TRUE
chr10_108923780_108924805	0.273348	0.0403949	-0.232953	36	-0.45156	31	506	372	2.48555e-30	29.6046	-29.6046	31	5.80548e-28	chr10	108923780	108924805	26609942	FALSE	TRUE
chr10_1094337_1095594	0.0325092	0.032187	-0.000322189	6416	-0.0318437	6703.5	506	372	0.419677	0.377085	-0.377085	6703.5	0.509304	chr10	1094337	1095594	1094337	TRUE	FALSE
chr10_1102144_1103341	0.0355802	0.0356937	0.000113443	8067	0.0110396	8490	506	372	0.779726	0.108058	0.108058	8490	0.827882	chr10	1102144	1103341	1102144	TRUE	FALSE
chr10_11059442_11060524	0.041116	0.0332091	-0.00790695	2413	-0.0953823	3563.5	506	372	0.0156299	1.80604	-1.80604	3561.5	0.0316028	chr10	11059442	11060524	11059442	FALSE	TRUE
chr10_110671724_110672326	0.199557	0.129902	-0.0696555	596	-0.236028	873	506	372	2.20041e-09	8.6575	-8.6575	873	1.62447e-08	chr10	110671724	110672326	24862421	FALSE	FALSE
chr10_111216604_111217083	0.419783	0.196762	-0.223021	43	-0.412682	76.5	506	372	1.32144e-25	24.879	-24.879	76.5	1.21779e-23	chr10	111216604	111217083	24317664	FALSE	TRUE
chr10_111682775_111683483	0.0961068	0.0969172	0.000810459	9295	0.0405776	9311	506	372	0.303784	0.517435	0.517435	9311	0.391902	chr10	111682775	111683483	23851264	FALSE	FALSE
chr10_111767087_111768355	0.0454716	0.0445357	-0.000935927	4615	-0.117137	2779	506	372	0.00298914	2.52445	-2.52445	2778	0.00735583	chr10	111767087	111768355	23766392	FALSE	FALSE
chr10_111967428_111970723	0.0587435	0.0577054	-0.00103811	4421	-0.0595329	5246	506	372	0.13135	0.881569	-0.881569	5246	0.196315	chr10	111967428	111970723	23564024	FALSE	FALSE
chr10_112064137_112064859	0.0369114	0.0358224	-0.001089	4354	-0.106958	3102	506	372	0.00671098	2.17321	-2.17321	3101	0.0151534	chr10	112064137	112064859	23469888	FALSE	FALSE
chr10_11207178_11207980	0.117521	0.0467209	-0.0708004	583	-0.364083	184	506	372	2.7579e-20	19.5594	-19.5594	184	1.08925e-18	chr10	11207178	11207980	11207178	FALSE	TRUE
chr10_112257163_112258684	0.0806455	0.0853128	0.00466728	10663	0.0847252	10202	506	372	0.0317672	1.49802	1.49802	10202	0.0587348	chr10	112257163	112258684	23276063	FALSE	FALSE
chr10_112289947_112290305	0.1718	0.209357	0.037557	12451	0.143823	11291.5	506	372	0.000267163	3.57322	3.57322	11291.5	0.000834892	chr10	112289947	112290305	23244442	FALSE	TRUE
chr10_112327072_112327870	0.0366034	0.0365667	-3.66569e-05	7528	-0.0218454	7213	506	372	0.579878	0.236663	-0.236663	7213	0.65842	chr10	112327072	112327870	23206877	FALSE	FALSE
chr10_112402953_112404328	0.135167	0.137756	0.00258967	10170	0.0187535	8735	506	372	0.634649	0.197467	0.197467	8735	0.705703	chr10	112402953	112404328	23130419	FALSE	TRUE
chr10_112431835_112432426	0.0609815	0.0569238	-0.00405769	2873	-0.127577	2467	506	372	0.00122306	2.91255	-2.91255	2466	0.00330318	chr10	112431835	112432426	23102321	FALSE	FALSE
chr10_112631414_112632476	0.064436	0.0619304	-0.00250556	3286	-0.139031	2183	506	372	0.000425466	3.37114	-3.37114	2183	0.00127857	chr10	112631414	112632476	22902271	FALSE	FALSE
chr10_112678307_112679894	0.0455199	0.045302	-0.000217941	6831	-0.0153003	7509	506	372	0.698261	0.155982	-0.155982	7509	0.761499	chr10	112678307	112679894	22854853	FALSE	FALSE
chr10_112835990_112839303	0.127769	0.123825	-0.0039434	2882	-0.0763526	4364	506	372	0.0529764	1.27592	-1.27592	4364	0.0910981	chr10	112835990	112839303	22695444	FALSE	TRUE
chr10_114206604_114207320	0.0300816	0.0306817	0.000600023	9049	0.0190616	8744	506	372	0.629093	0.201285	0.201285	8744	0.700889	chr10	114206604	114207320	21327427	FALSE	FALSE
chr10_115439007_115440196	0.0655157	0.0670306	0.00151496	9749	0.131593	11081	506	372	0.000852238	3.06944	3.06944	11081	0.00238785	chr10	115439007	115440196	20094551	FALSE	FALSE
chr10_115614373_115615056	0.0319892	0.0320137	2.45273e-05	7756.5	0.0145884	8606.5	506	372	0.711662	0.147726	0.147726	8606.5	0.772445	chr10	115614373	115615056	19919691	FALSE	FALSE
chr10_115803358_115805468	0.198984	0.23161	0.0326268	12308	0.103574	10572	506	372	0.00866284	2.06234	2.06234	10572	0.0188614	chr10	115803358	115805468	19729279	FALSE	TRUE
chr10_115933379_115934262	0.0370538	0.0368088	-0.000245042	6729	-0.0670662	4862	506	372	0.0891802	1.04973	-1.04973	4862	0.141649	chr10	115933379	115934262	19600485	FALSE	FALSE
chr10_115938962_115939292	0.925239	0.921455	-0.003784	2910	-0.015704	7492	506	372	0.690702	0.160709	-0.160709	7492	0.755018	chr10	115938962	115939292	19595455	FALSE	TRUE
chr10_115999008_115999603	0.101354	0.128323	0.0269693	12116	0.294456	13083	506	372	8.44451e-14	13.0734	13.0734	13083	1.24616e-12	chr10	115999008	115999603	19535144	FALSE	TRUE
chr10_116527524_116528474	0.145998	0.159256	0.0132585	11482	0.0635917	9817	506	372	0.107033	0.970483	0.970483	9818	0.165428	chr10	116527524	116528474	19006273	FALSE	TRUE
chr10_11652834_11653962	0.0389487	0.0378241	-0.00112455	4300	-0.119831	2692	506	372	0.00238848	2.62188	-2.62188	2691	0.00601875	chr10	11652834	11653962	11652834	FALSE	FALSE
chr10_116697893_116698376	0.0411105	0.0405717	-0.000538751	5602	-0.07104	4654	506	372	0.0717881	1.14395	-1.14395	4654	0.117781	chr10	116697893	116698376	18836371	FALSE	FALSE
chr10_116852261_116854094	0.0656963	0.0514021	-0.0142941	1967	-0.217816	1032	506	372	3.37687e-08	7.47149	-7.47149	1032	2.04408e-07	chr10	116852261	116854094	18680653	FALSE	TRUE
chr10_118030732_118034230	0.123822	0.0838418	-0.0399798	1076	-0.248842	763	506	372	2.84383e-10	9.5461	-9.5461	763	2.41085e-09	chr10	118030732	118034230	17500517	FALSE	TRUE
chr10_118429430_118429853	0.482161	0.540722	0.0585617	12824	0.148073	11371	506	372	0.00017477	3.75753	3.75753	11371	0.000569686	chr10	118429430	118429853	17104894	FALSE	FALSE
chr10_118608599_118609377	0.0614826	0.063153	0.00167032	9821	0.140401	11244	506	372	0.000372975	3.42832	3.42832	11244	0.00113391	chr10	118608599	118609377	16925370	FALSE	FALSE
chr10_11865125_11865984	0.0681183	0.0715373	0.00341906	10415	0.126503	10985	506	372	0.00134478	2.87135	2.87135	10985	0.00360034	chr10	11865125	11865984	11865125	FALSE	FALSE
chr10_118764228_118765146	0.0420156	0.0418904	-0.000125173	7203	0.0219941	8837	506	372	0.5773	0.238599	0.238599	8837	0.656428	chr10	118764228	118765146	16769601	FALSE	FALSE
chr10_118895963_118898037	0.267615	0.29216	0.0245454	12033	-0.00919079	7776	506	372	0.815904	0.0883611	-0.0883611	7776	0.856294	chr10	118895963	118898037	16636710	FALSE	TRUE
chr10_118899247_118900329	0.463166	0.36855	-0.094616	383	-0.196141	1273	506	372	6.65077e-07	6.17713	-6.17713	1273	3.27272e-06	chr10	118899247	118900329	16634418	FALSE	TRUE
chr10_118922351_118923520	0.172439	0.210978	0.0385392	12472	0.0790089	10084.5	506	372	0.0452374	1.3445	1.3445	10084.5	0.0795471	chr10	118922351	118923520	16611227	FALSE	TRUE
chr10_118927021_118928132	0.13862	0.175007	0.0363874	12417	0.151706	11434	506	372	0.000120529	3.91891	3.91891	11434	0.000406273	chr10	118927021	118928132	16606615	FALSE	TRUE
chr10_118976049_118976706	0.0520581	0.0604321	0.00837403	11107	0.0708912	9941	506	372	0.072385	1.14035	1.14035	9941	0.118587	chr10	118976049	118976706	16558041	FALSE	FALSE
chr10_119000435_119001530	0.119194	0.130434	0.0112406	11339	-0.0136852	7579	506	372	0.728791	0.137397	-0.137397	7579	0.786562	chr10	119000435	119001530	16533217	FALSE	TRUE
chr10_11911554_11912432	0.874386	0.857546	-0.01684	1834	-0.0658443	4922	506	372	0.0951634	1.02153	-1.02153	4922	0.14973	chr10	11911554	11912432	11911554	FALSE	FALSE
chr10_119133803_119135632	0.0296046	0.0294561	-0.000148537	7125	-0.0510062	5722	506	372	0.196122	0.707473	-0.707473	5722	0.273172	chr10	119133803	119135632	16399115	FALSE	FALSE
chr10_119293917_119297675	0.271042	0.34592	0.0748785	12986	0.185239	11928	506	372	2.66629e-06	5.57409	5.57409	11928	1.19209e-05	chr10	119293917	119297675	16237072	FALSE	TRUE
chr10_119301321_119305368	0.225734	0.195226	-0.0305075	1310	-0.180405	1480	506	372	4.82059e-06	5.3169	-5.3169	1480	2.05684e-05	chr10	119301321	119305368	16229379	FALSE	TRUE
chr10_119609_120162	0.15985	0.218284	0.0584345	12823	0.333142	13276	506	372	3.0731e-17	16.5124	16.5124	13276	7.51467e-16	chr10	119609	120162	119609	TRUE	FALSE
chr10_119805825_119806544	0.0212188	0.0210447	-0.00017415	7019	-0.0312274	6744	506	372	0.428733	0.367813	-0.367813	6744	0.517743	chr10	119805825	119806544	15728203	FALSE	FALSE
chr10_120101564_120101937	0.0370405	0.0369035	-0.000137016	7159	0.00153003	8158	506	372	0.969173	0.0135988	0.0135988	8158	0.977107	chr10	120101564	120101937	15432810	FALSE	FALSE
chr10_120353692_120355821	0.43991	0.337383	-0.102527	326	-0.328924	304	506	372	7.63041e-17	16.1175	-16.1175	304	1.74316e-15	chr10	120353692	120355821	15178926	FALSE	TRUE
chr10_120513949_120515108	0.0362008	0.0370347	0.000833884	9317	0.0636661	9819	506	372	0.106623	0.972149	0.972149	9820	0.164907	chr10	120513949	120515108	15019639	FALSE	FALSE
chr10_120801661_120802226	0.932961	0.93774	0.00477958	10679	0.133442	11119	506	372	0.000719324	3.14308	3.14308	11119	0.00205022	chr10	120801661	120802226	14732521	FALSE	FALSE
chr10_120839592_120840480	0.0439411	0.0438145	-0.000126593	7197	-0.0214629	7232	506	372	0.586532	0.231708	-0.231708	7232	0.664028	chr10	120839592	120840480	14694267	FALSE	FALSE
chr10_12084236_12085431	0.0387329	0.039452	0.000719104	9178	0.0172978	8692	506	372	0.66117	0.179687	0.179687	8692	0.729386	chr10	12084236	12085431	12084236	FALSE	FALSE
chr10_120924785_120925558	0.0289026	0.0307633	0.00186075	9914	0.224999	12454	506	372	1.17901e-08	7.92848	7.92848	12454	7.71595e-08	chr10	120924785	120925558	14609189	FALSE	FALSE
chr10_120938028_120938418	0.0234116	0.0236028	0.000191219	8299	0.000541884	8121	506	372	0.989149	0.00473826	0.00473826	8121	0.992519	chr10	120938028	120938418	14596329	FALSE	FALSE
chr10_120966127_120967623	0.0547341	0.0574073	0.0026732	10194	0.0825311	10167	506	372	0.0364639	1.43814	1.43814	10167	0.0663234	chr10	120966127	120967623	14567124	FALSE	FALSE
chr10_12110700_12111303	0.0528304	0.0524162	-0.0004142	6042	-0.0333365	6628	506	372	0.398212	0.399886	-0.399886	6628	0.488554	chr10	12110700	12111303	12110700	FALSE	FALSE
chr10_121301478_121303169	0.0621486	0.142354	0.0802056	13035	0.33345	13277	506	372	2.87431e-17	16.5415	16.5415	13277	7.05402e-16	chr10	121301478	121303169	14231578	FALSE	TRUE
chr10_121355813_121356958	0.0465166	0.0467092	0.00019256	8301	-0.0209316	7252	506	372	0.595833	0.224875	-0.224875	7252	0.672198	chr10	121355813	121356958	14177789	FALSE	FALSE
chr10_121410566_121411827	0.0291907	0.0299192	0.000728501	9189	0.129765	11045	506	372	0.00100571	2.99753	2.99753	11045	0.00277311	chr10	121410566	121411827	14122920	FALSE	FALSE
chr10_121631654_121633104	0.021257	0.0212035	-5.35585e-05	7466	-0.0158953	7484	506	372	0.687132	0.16296	-0.16296	7484	0.751844	chr10	121631654	121633104	13901643	FALSE	FALSE
chr10_121652003_121652507	0.0143947	0.0144112	1.65058e-05	7735	0.0146628	8611	506	372	0.710257	0.148584	0.148584	8611	0.771724	chr10	121652003	121652507	13882240	FALSE	FALSE
chr10_12171225_12172038	0.0384613	0.0406463	0.00218497	10034	0.239555	12621	506	372	1.26574e-09	8.89766	8.89766	12621	9.73154e-09	chr10	12171225	12172038	12171225	FALSE	FALSE
chr10_122216259_122217377	0.135013	0.110646	-0.0243677	1526	-0.190159	1349	506	372	1.43794e-06	5.84226	-5.84226	1349	6.69637e-06	chr10	122216259	122217377	13317370	FALSE	TRUE
chr10_12237832_12238377	0.0435523	0.043617	6.47008e-05	7907	-0.0364656	6462	506	372	0.355418	0.44926	-0.44926	6462	0.446026	chr10	12237832	12238377	12237832	FALSE	FALSE
chr10_122610678_122611052	0.0427151	0.0401701	-0.00254504	3275	-0.0863084	3892	506	372	0.0287093	1.54198	-1.54198	3892	0.0539799	chr10	122610678	122611052	12923695	FALSE	FALSE
chr10_123356616_123358285	0.0587143	0.0579832	-0.000731103	5047	0.0692656	9911	506	372	0.0791764	1.1014	1.1014	9911	0.128133	chr10	123356616	123358285	12176462	FALSE	FALSE
chr10_123686972_123688109	0.025979	0.0258401	-0.000138963	7155	-0.026053	7001	506	372	0.50912	0.29318	-0.29318	7001	0.594266	chr10	123686972	123688109	11846638	FALSE	FALSE
chr10_123734027_123734865	0.0265753	0.0262298	-0.000345537	6327	-0.0520209	5678	506	372	0.18737	0.727299	-0.727299	5678	0.26271	chr10	123734027	123734865	11799882	FALSE	FALSE
chr10_123872119_123873462	0.0556879	0.0588974	0.0032095	10357	0.112011	10738	506	372	0.00452677	2.34421	2.34421	10738	0.0106762	chr10	123872119	123873462	11661285	FALSE	FALSE
chr10_12390802_12392589	0.0603835	0.0571717	-0.00321179	3057	-0.201369	1210	506	372	3.32913e-07	6.47767	-6.47767	1210	1.71677e-06	chr10	12390802	12392589	12390802	FALSE	FALSE
chr10_123922850_123923542	0.569688	0.0944029	-0.475285	2	-0.446651	37	506	372	1.03557e-29	28.9848	-28.9848	37	2.00413e-27	chr10	123922850	123923542	11611205	FALSE	FALSE
chr10_124220338_124222240	0.0797711	0.0792163	-0.000554785	5536	0.0287624	9007	506	372	0.466074	0.331546	0.331546	9007	0.553462	chr10	124220338	124222240	11312507	FALSE	TRUE
chr10_124638743_124639793	0.122245	0.183562	0.0613168	12859	0.235305	12581	506	372	2.46192e-09	8.60873	8.60873	12581	1.8067e-08	chr10	124638743	124639793	10894954	FALSE	FALSE
chr10_124713268_124714249	0.118145	0.112484	-0.0056608	2637	-0.0376769	6405.5	506	372	0.339663	0.468952	-0.468952	6406	0.429677	chr10	124713268	124714249	10820498	FALSE	FALSE
chr10_124767758_124768897	0.0425012	0.0430616	0.000560351	8984	-0.000892516	8064	506	372	0.982059	0.00786229	-0.00786229	8064	0.987156	chr10	124767758	124768897	10765850	FALSE	FALSE
chr10_124892266_124893337	0.0527379	0.0387975	-0.0139404	1984	-0.304868	404	506	372	1.10004e-14	13.9586	-13.9586	404	1.85351e-13	chr10	124892266	124893337	10641410	FALSE	TRUE
chr10_124894075_124897366	0.147331	0.138718	-0.00861341	2353	-0.0600323	5217	506	372	0.128145	0.892297	-0.892297	5217.5	0.192268	chr10	124894075	124897366	10637381	FALSE	TRUE
chr10_124901907_124902617	0.328797	0.195419	-0.133378	185	-0.318309	358	506	372	7.15772e-16	15.1452	-15.1452	358	1.40327e-14	chr10	124901907	124902617	10632130	FALSE	TRUE
chr10_124907283_124911035	0.277794	0.219443	-0.0583513	756	-0.224181	980	506	372	1.33131e-08	7.87572	-7.87572	980	8.67077e-08	chr10	124907283	124911035	10623712	FALSE	TRUE
chr10_124913631_124914726	0.0385395	0.0383756	-0.000163823	7056	-0.0236729	7112	506	372	0.548584	0.260757	-0.260757	7112	0.630978	chr10	124913631	124914726	10620021	FALSE	FALSE
chr10_125425495_125426642	0.385932	0.22304	-0.162893	117	-0.362563	188	506	372	3.94794e-20	19.4036	-19.4036	188	1.5194e-18	chr10	125425495	125426642	10108105	FALSE	TRUE
chr10_125650820_125651373	0.397161	0.322993	-0.0741683	544	-0.177292	1517	506	372	7.00486e-06	5.1546	-5.1546	1517	2.90732e-05	chr10	125650820	125651373	9883374	TRUE	FALSE
chr10_125732220_125732843	0.405243	0.352146	-0.0530965	845	-0.0820052	4095.5	506	372	0.0376739	1.42396	-1.42396	4096	0.068149	chr10	125732220	125732843	9801904	TRUE	TRUE
chr10_125851151_125853233	0.0783183	0.0713266	-0.00699166	2502	-0.0635811	5036.5	506	372	0.107091	0.970245	-0.970245	5036.5	0.165462	chr10	125851151	125853233	9681514	TRUE	FALSE
chr10_126077405_126078075	0.044613	0.0443111	-0.000301924	6497	0.018626	8732.5	506	372	0.636954	0.195892	0.195892	8732.5	0.707686	chr10	126077405	126078075	9456672	TRUE	FALSE
chr10_126106818_126107862	0.0576216	0.0547423	-0.00287931	3148	-0.0656955	4930	506	372	0.0959133	1.01812	-1.01812	4930	0.1507	chr10	126106818	126107862	9426885	TRUE	FALSE
chr10_126135809_126138896	0.0903408	0.0901122	-0.000228673	6794	-0.0896659	3765.5	506	372	0.0230529	1.63727	-1.63727	3764.5	0.0445567	chr10	126135809	126138896	9395851	TRUE	TRUE
chr10_126150243_126150740	0.0250813	0.0245225	-0.000558751	5526	-0.0998449	3383	506	372	0.0113883	1.94354	-1.94354	3381	0.0240082	chr10	126150243	126150740	9384007	TRUE	FALSE
chr10_126431314_126433285	0.0397821	0.0400397	0.000257574	8461	0.0397594	9295	506	372	0.313639	0.50357	0.50357	9295	0.402469	chr10	126431314	126433285	9101462	TRUE	FALSE
chr10_126480092_126480810	0.0294798	0.0287962	-0.000683598	5153	-0.0977623	3470	506	372	0.0132207	1.87875	-1.87875	3468	0.0273269	chr10	126480092	126480810	9053937	TRUE	FALSE
chr10_126490161_126490934	0.0400687	0.0399405	-0.000128224	7193	-0.0443389	6058	506	372	0.261145	0.583118	-0.583118	6058	0.346905	chr10	126490161	126490934	9043813	TRUE	FALSE
chr10_126605120_126606212	0.0191292	0.0189415	-0.000187688	6965	-0.0267436	6962	506	372	0.497953	0.302812	-0.302812	6962	0.584049	chr10	126605120	126606212	8928535	TRUE	FALSE
chr10_126847224_126851327	0.164385	0.191226	0.0268407	12113	0.404193	13466	506	372	1.25121e-24	23.9027	23.9027	13466	9.91237e-23	chr10	126847224	126851327	8683420	TRUE	TRUE
chr10_127407627_127408566	0.0363236	0.0367463	0.000422716	8784	0.043457	9380	506	372	0.270751	0.567431	0.567431	9380	0.3569	chr10	127407627	127408566	8126181	TRUE	FALSE
chr10_127511329_127512197	0.0415661	0.0419909	0.00042475	8786	0.0400995	9302	506	372	0.309518	0.509314	0.509314	9302	0.398048	chr10	127511329	127512197	8022550	TRUE	FALSE
chr10_128076155_128077482	0.220923	0.235058	0.0141347	11538	0.0260211	8942	506	372	0.509638	0.292738	0.292738	8942	0.59482	chr10	128076155	128077482	7457265	TRUE	TRUE
chr10_128193311_128193531	0.622553	0.784315	0.161762	13408	0.327744	13254	506	372	9.81984e-17	16.0079	16.0079	13254	2.18798e-15	chr10	128193311	128193531	7341216	TRUE	TRUE
chr10_128593609_128595048	0.0360919	0.0303915	-0.00570038	2630	-0.108281	3055	506	372	0.00606245	2.21735	-2.21735	3054	0.0138402	chr10	128593609	128595048	6939699	TRUE	FALSE
chr10_128993505_128995167	0.123468	0.0640799	-0.0593878	740	-0.223278	987	506	372	1.52163e-08	7.81769	-7.81769	987	9.80198e-08	chr10	128993505	128995167	6539580	TRUE	TRUE
chr10_129534410_129537366	0.38309	0.299041	-0.0840495	471	-0.182626	1452	506	372	3.67909e-06	5.43426	-5.43426	1452	1.60362e-05	chr10	129534410	129537366	5997381	TRUE	TRUE
chr10_129923813_129924962	0.0357156	0.0388045	0.00308893	10317	0.210655	12254.5	506	372	9.3374e-08	7.02977	7.02977	12254.5	5.25088e-07	chr10	129923813	129924962	5609785	TRUE	FALSE
chr10_129947728_129949099	0.484603	0.533795	0.0491916	12692	0.227421	12483	506	372	8.2077e-09	8.08578	8.08578	12483	5.51263e-08	chr10	129947728	129949099	5585648	TRUE	TRUE
chr10_130008558_130009620	0.376396	0.493761	0.117366	13287	0.332483	13274	506	372	3.54473e-17	16.4504	16.4504	13274	8.59041e-16	chr10	130008558	130009620	5525127	TRUE	TRUE
chr10_130339526_130339777	0.106472	0.0829923	-0.0234801	1557	-0.148498	1974	506	372	0.000167407	3.77623	-3.77623	1974	0.000547529	chr10	130339526	130339777	5194970	TRUE	FALSE
chr10_131264948_131265710	0.0524767	0.0687445	0.0162678	11663	0.161227	11557	506	372	4.38219e-05	4.35831	4.35831	11557	0.000158859	chr10	131264948	131265710	4269037	TRUE	FALSE
chr10_13141778_13142493	0.0420637	0.0425496	0.000485871	8883	0.0661099	9865	506	372	0.0938361	1.02763	1.02763	9866	0.148003	chr10	13141778	13142493	13141778	FALSE	FALSE
chr10_131756690_131758787	0.338472	0.312043	-0.0264292	1443	-0.0733032	4527	506	372	0.0631943	1.19932	-1.19932	4527	0.105704	chr10	131756690	131758787	3775960	TRUE	TRUE
chr10_131761169_131771696	0.240216	0.203482	-0.0367344	1141	-0.134664	2297	506	372	0.000642339	3.19224	-3.19224	2295	0.00185381	chr10	131761169	131771696	3763051	TRUE	TRUE
chr10_131843516_131844219	0.515455	0.591948	0.0764928	13000	0.18151	11872	506	372	4.21567e-06	5.37513	5.37513	11872	1.81762e-05	chr10	131843516	131844219	3690528	TRUE	TRUE
chr10_131934520_131935324	0.0599096	0.060413	0.000503357	8906	-0.000648136	8071	506	372	0.987001	0.00568261	-0.00568261	8071	0.991171	chr10	131934520	131935324	3599423	TRUE	FALSE
chr10_131988211_131989332	0.178655	0.235322	0.0566669	12804	0.298844	13106	506	372	3.6072e-14	13.4428	13.4428	13106	5.59116e-13	chr10	131988211	131989332	3545415	TRUE	FALSE
chr10_13203436_13203790	0.0314588	0.0304257	-0.00103303	4429	-0.0743126	4473	506	372	0.0596453	1.22442	-1.22442	4473	0.1007	chr10	13203436	13203790	13203436	FALSE	FALSE
chr10_133109193_133111052	0.24598	0.170921	-0.0750591	533	-0.183784	1435	506	372	3.1916e-06	5.49599	-5.49599	1435	1.40515e-05	chr10	133109193	133111052	2423695	TRUE	TRUE
chr10_13341377_13342223	0.0438376	0.0448813	0.00104375	9462	0.15245	11441	506	372	0.000111592	3.95237	3.95237	11441	0.000378785	chr10	13341377	13342223	13341377	FALSE	FALSE
chr10_133794898_133796598	0.351087	0.391999	0.0409121	12524	0.226667	12469	506	372	9.19125e-09	8.03663	8.03663	12469	6.10961e-08	chr10	133794898	133796598	1738149	TRUE	FALSE
chr10_133849676_133850826	0.0991057	0.107741	0.00863539	11138	0.0672149	9885	506	372	0.0884729	1.05319	1.05319	9885	0.140773	chr10	133849676	133850826	1683921	TRUE	TRUE
chr10_133948325_133948677	0.864976	0.851628	-0.0133476	2013	-0.0450189	6031	506	372	0.253902	0.595335	-0.595335	6031	0.338744	chr10	133948325	133948677	1586070	TRUE	TRUE
chr10_133953845_133954279	0.855302	0.824223	-0.0310795	1296	-0.0441583	6072.5	506	372	0.263093	0.57989	-0.57989	6072.5	0.348808	chr10	133953845	133954279	1580468	TRUE	TRUE
chr10_133998912_134001500	0.185351	0.174725	-0.0106263	2193	-0.0731013	4540	506	372	0.0639246	1.19433	-1.19433	4540	0.106754	chr10	133998912	134001500	1533247	TRUE	TRUE
chr10_134120447_134122422	0.0282702	0.0362537	0.00798346	11074	0.237367	12601	506	372	1.78549e-09	8.74824	8.74824	12601	1.34154e-08	chr10	134120447	134122422	1412325	TRUE	FALSE
chr10_134145177_134146025	0.0270091	0.0270127	3.62843e-06	7685	-0.0149603	7522	506	372	0.70465	0.152027	-0.152027	7522	0.767108	chr10	134145177	134146025	1388722	TRUE	FALSE
chr10_134209367_134211056	0.116515	0.122028	0.00551287	10809	0.12593	10976	506	372	0.00141436	2.84944	2.84944	10976	0.00376726	chr10	134209367	134211056	1323691	TRUE	FALSE
chr10_134218268_134219615	0.914609	0.92371	0.00910085	11191	0.232208	12540	506	372	3.96949e-09	8.40127	8.40127	12540	2.79494e-08	chr10	134218268	134219615	1315132	TRUE	TRUE
chr10_134504420_134505591	0.947191	0.946774	-0.000417054	6037	0.0227485	8852	506	372	0.564308	0.248484	0.248484	8852	0.644795	chr10	134504420	134505591	1029156	TRUE	TRUE
chr10_134593235_134593577	0.965237	0.967686	0.00244969	10126	0.140816	11257	506	372	0.000358338	3.44571	3.44571	11257	0.00109531	chr10	134593235	134593577	941170	TRUE	TRUE
chr10_134597357_134602649	0.213088	0.195913	-0.0171756	1819	-0.016044	7478	506	372	0.68436	0.164715	-0.164715	7478	0.749295	chr10	134597357	134602649	932098	TRUE	TRUE
chr10_134672369_134672604	0.875258	0.864331	-0.010927	2170	0.00297505	8217	506	372	0.939999	0.0268728	0.0268728	8217	0.955086	chr10	134672369	134672604	862143	TRUE	TRUE
chr10_134732601_134733777	0.584424	0.587165	0.00274158	10218	0.108621	10678	506	372	0.00590515	2.22877	2.22877	10678	0.0135336	chr10	134732601	134733777	800970	TRUE	TRUE
chr10_134735972_134736254	0.890941	0.911545	0.0206043	11873	0.106294	10632	506	372	0.00705951	2.15123	2.15123	10632	0.0158205	chr10	134735972	134736254	798493	TRUE	TRUE
chr10_134755663_134756852	0.210528	0.155886	-0.0546425	818	-0.237962	851.5	506	372	1.62656e-09	8.78873	-8.78873	851.5	1.22826e-08	chr10	134755663	134756852	777895	TRUE	FALSE
chr10_134826130_134826843	0.772919	0.76899	-0.00392979	2885	0.0270942	8964	506	372	0.492334	0.30774	0.30774	8964	0.57841	chr10	134826130	134826843	707904	TRUE	TRUE
chr10_134876330_134878539	0.640136	0.638637	-0.00149852	3857	0.000350631	8115	506	372	0.993017	0.00304349	0.00304349	8115	0.995294	chr10	134876330	134878539	656208	TRUE	TRUE
chr10_134901198_134902619	0.160379	0.0653474	-0.0950318	379	-0.470048	24	506	372	1.00315e-32	31.9986	-31.9986	24	3.48453e-30	chr10	134901198	134902619	632128	TRUE	TRUE
chr10_134955508_134955800	0.687678	0.714432	0.0267546	12110	0.137246	11198	506	372	0.000504194	3.2974	3.2974	11198	0.00149036	chr10	134955508	134955800	578947	TRUE	TRUE
chr10_134973510_134974311	0.0274814	0.0259465	-0.00153488	3807	-0.0614773	5149.5	506	372	0.119214	0.923674	-0.923674	5149.5	0.18089	chr10	134973510	134974311	560436	TRUE	FALSE
chr10_135043221_135044560	0.249697	0.193909	-0.0557882	798	-0.13987	2162	506	372	0.000392557	3.4061	-3.4061	2162	0.00118944	chr10	135043221	135044560	490187	TRUE	TRUE
chr10_135048797_135052077	0.196637	0.157125	-0.039512	1080	-0.25221	741	506	372	1.63267e-10	9.7871	-9.7871	741	1.43622e-09	chr10	135048797	135052077	482670	TRUE	TRUE
chr10_135089969_135090491	0.0476289	0.132508	0.0848788	13078	0.274204	12935	506	372	3.65545e-12	11.4371	11.4371	12935	4.20377e-11	chr10	135089969	135090491	444256	TRUE	FALSE
chr10_135148196_135150565	0.090467	0.0902831	-0.000183888	6980	-0.00256067	8015	506	372	0.948358	0.0230276	-0.0230276	8015	0.961345	chr10	135148196	135150565	384182	TRUE	FALSE
chr10_135170645_135171954	0.279958	0.324228	0.0442703	12592	0.0979748	10465	506	372	0.0130224	1.88531	1.88531	10465	0.0269706	chr10	135170645	135171954	362793	TRUE	FALSE
chr10_135186693_135187181	0.0410709	0.0401122	-0.000958748	4556	0.00208254	8176	506	372	0.958011	0.0186295	0.0186295	8176	0.968159	chr10	135186693	135187181	347566	TRUE	FALSE
chr10_135191594_135193307	0.0535065	0.0631386	0.00963211	11228	0.187705	11961	506	372	1.96041e-06	5.70765	5.70765	11961	8.93899e-06	chr10	135191594	135193307	341440	TRUE	FALSE
chr10_135236687_135238237	0.213818	0.220884	0.00706652	10981	0.0515428	9553	506	372	0.191458	0.717927	0.717927	9554	0.267638	chr10	135236687	135238237	296510	TRUE	TRUE
chr10_135270783_135271061	0.89221	0.909998	0.0177871	11738	0.113647	10758	506	372	0.0039719	2.401	2.401	10758	0.00947645	chr10	135270783	135271061	263686	TRUE	FALSE
chr10_135341255_135342561	0.237424	0.220889	-0.0165358	1847	-0.049014	5811.5	506	372	0.214169	0.669244	-0.669244	5811.5	0.294194	chr10	135341255	135342561	192186	TRUE	TRUE
chr10_135381534_135383032	0.826054	0.818052	-0.00800222	2403	-0.101226	3335.5	506	372	0.0103008	1.98713	-1.98713	3333.5	0.0219687	chr10	135381534	135383032	151715	TRUE	TRUE
chr10_13628789_13629266	0.0416791	0.0414855	-0.000193566	6936	-0.030218	6799	506	372	0.443809	0.352804	-0.352804	6799	0.532154	chr10	13628789	13629266	13628789	FALSE	FALSE
chr10_14879769_14881041	0.0594875	0.0582907	-0.00119679	4202	-0.116537	2794.5	506	372	0.00314053	2.503	-2.503	2793.5	0.00769067	chr10	14879769	14881041	14879769	FALSE	FALSE
chr10_14920320_14921688	0.0328702	0.0330215	0.000151232	8183	-0.0127077	7612	506	372	0.747485	0.126398	-0.126398	7612	0.802773	chr10	14920320	14921688	14920320	FALSE	FALSE
chr10_14995680_14996431	0.0506705	0.050412	-0.000258483	6677	-0.0270836	6948.5	506	372	0.492504	0.30759	-0.30759	6948.5	0.57851	chr10	14995680	14996431	14995680	FALSE	FALSE
chr10_15001272_15001840	0.0285274	0.0284961	-3.1257e-05	7549	-0.013494	7586	506	372	0.732436	0.13523	-0.13523	7586	0.789867	chr10	15001272	15001840	15001272	FALSE	FALSE
chr10_15130386_15130913	0.0440004	0.0435202	-0.000480209	5792	-0.0275617	6916	506	372	0.484895	0.314352	-0.314352	6916	0.571803	chr10	15130386	15130913	15130386	FALSE	FALSE
chr10_15138965_15139851	0.0413925	0.0399512	-0.00144137	3925	-0.1035	3249	506	372	0.00871092	2.05994	-2.05994	3248	0.0189539	chr10	15138965	15139851	15138965	FALSE	FALSE
chr10_15209824_15210714	0.0195441	0.0198437	0.000299674	8549	-0.0072995	7840	506	372	0.853323	0.0688865	-0.0688865	7840	0.887726	chr10	15209824	15210714	15209824	FALSE	FALSE
chr10_15254598_15254852	0.937185	0.939396	0.0022108	10043	0.0324015	9104	506	372	0.411578	0.385548	0.385548	9104	0.501542	chr10	15254598	15254852	15254598	FALSE	FALSE
chr10_15761423_15762101	0.280258	0.0994583	-0.1808	86	-0.330815	297.5	506	372	5.08234e-17	16.2939	-16.2939	297.5	1.18708e-15	chr10	15761423	15762101	15761423	FALSE	TRUE
chr10_1595542_1595792	0.778499	0.663864	-0.114634	275	-0.25255	739	506	372	1.54312e-10	9.8116	-9.8116	739	1.36009e-09	chr10	1595542	1595792	1595542	TRUE	TRUE
chr10_16478803_16479303	0.0458292	0.0491903	0.00336115	10406	0.212833	12286.5	506	372	6.87619e-08	7.16265	7.16265	12286.5	3.95549e-07	chr10	16478803	16479303	16478803	FALSE	FALSE
chr10_16561604_16563822	0.258912	0.281453	0.0225409	11953	0.0445089	9414.5	506	372	0.259321	0.586162	0.586162	9414.5	0.344921	chr10	16561604	16563822	16561604	FALSE	TRUE
chr10_16859089_16859975	0.0715725	0.0706344	-0.00093811	4607	-0.0413426	6223.5	506	372	0.294757	0.530536	-0.530536	6223.5	0.382368	chr10	16859089	16859975	16859089	FALSE	FALSE
chr10_17270430_17272617	0.0592277	0.0815416	0.0223139	11944	0.099048	10481	506	372	0.012061	1.91862	1.91862	10481	0.0251912	chr10	17270430	17272617	17270430	FALSE	FALSE
chr10_1741424_1744125	0.839678	0.816643	-0.0230349	1575	-0.0471652	5919.5	506	372	0.23196	0.634586	-0.634586	5919.5	0.314363	chr10	1741424	1744125	1741424	TRUE	TRUE
chr10_17495407_17496721	0.0745504	0.0722515	-0.00229895	3355	0.00940329	8426	506	372	0.811724	0.0905918	0.0905918	8426	0.853362	chr10	17495407	17496721	17495407	FALSE	TRUE
chr10_17658665_17659639	0.0537344	0.0548638	0.00112936	9533	0.0734944	9980	506	372	0.0625088	1.20406	1.20406	9980	0.104673	chr10	17658665	17659639	17658665	FALSE	FALSE
chr10_17686097_17686335	0.0380748	0.0391885	0.00111364	9517	0.0619873	9776	506	372	0.116181	0.934866	0.934866	9776	0.177101	chr10	17686097	17686335	17686097	FALSE	FALSE
chr10_1778784_1780018	0.0783498	0.0627471	-0.0156027	1902	-0.214214	1082	506	372	5.65481e-08	7.24758	-7.24758	1082	3.29771e-07	chr10	1778784	1780018	1778784	TRUE	TRUE
chr10_180582_182452	0.0542826	0.0544669	0.000184372	8279	-0.0260848	6999	506	372	0.508602	0.293622	-0.293622	6999	0.593814	chr10	180582	182452	180582	TRUE	FALSE
chr10_18429125_18430234	0.0526109	0.0345111	-0.0180998	1775	-0.236442	866	506	372	2.06285e-09	8.68553	-8.68553	866	1.53294e-08	chr10	18429125	18430234	18429125	FALSE	TRUE
chr10_18940528_18940765	0.0238211	0.0232663	-0.000554856	5535	-0.0632199	5058	506	372	0.109101	0.962173	-0.962173	5058	0.168048	chr10	18940528	18940765	18940528	FALSE	FALSE
chr10_18948113_18948711	0.0246919	0.0248001	0.000108223	8057	-0.0125908	7622.5	506	372	0.74973	0.125095	-0.125095	7622	0.804419	chr10	18948113	18948711	18948113	FALSE	FALSE
chr10_20104451_20106105	0.0997855	0.0885108	-0.0112747	2147	-0.144779	2057	506	372	0.000243065	3.61428	-3.61428	2057	0.000767018	chr10	20104451	20106105	20104451	FALSE	FALSE
chr10_21462128_21463808	0.0888235	0.191594	0.102771	13214	0.289728	13053	506	372	2.08298e-13	12.6813	12.6813	13053	2.9151e-12	chr10	21462128	21463808	21462128	FALSE	TRUE
chr10_21783198_21786420	0.088322	0.0913719	0.00304987	10302	0.0846615	10201	506	372	0.0318959	1.49626	1.49626	10201	0.0589407	chr10	21783198	21786420	21783198	FALSE	FALSE
chr10_21797632_21799341	0.78976	0.757829	-0.0319313	1263	-0.0807514	4158.5	506	372	0.0406967	1.39044	-1.39044	4158.5	0.0727045	chr10	21797632	21799341	21797632	FALSE	FALSE
chr10_21814786_21815716	0.0421965	0.0438973	0.00170073	9839	0.163362	11593	506	372	3.46583e-05	4.46019	4.46019	11593	0.000128003	chr10	21814786	21815716	21814786	FALSE	FALSE
chr10_21822850_21824410	0.0706746	0.0731451	0.00247049	10133	0.0471014	9471	506	372	0.232592	0.633405	0.633405	9471	0.315093	chr10	21822850	21824410	21822850	FALSE	FALSE
chr10_22292300_22292897	0.0330681	0.0333003	0.000232205	8400	0.0202941	8779	506	372	0.607082	0.216753	0.216753	8779	0.681935	chr10	22292300	22292897	22292300	FALSE	FALSE
chr10_22540707_22542739	0.335759	0.361614	0.0258543	12071	0.126142	10981	506	372	0.00138821	2.85755	2.85755	10981	0.00370709	chr10	22540707	22542739	22540707	FALSE	TRUE
chr10_22604907_22605632	0.0380845	0.0375234	-0.000561111	5517	-0.0408538	6251	506	372	0.300503	0.522151	-0.522151	6250	0.388335	chr10	22604907	22605632	22604907	FALSE	FALSE
chr10_22623350_22625875	0.356474	0.395396	0.0389215	12482	0.139179	11229	506	372	0.000419452	3.37732	3.37732	11229	0.00126358	chr10	22623350	22625875	22623350	FALSE	TRUE
chr10_22634000_22634862	0.49923	0.453135	-0.0460944	967	-0.104743	3208	506	372	0.00793778	2.1003	-2.1003	3207	0.017468	chr10	22634000	22634862	22634000	FALSE	TRUE
chr10_22725491_22726764	0.0987382	0.125656	0.0269178	12115	0.306792	13159	506	372	7.49317e-15	14.1253	14.1253	13159	1.29148e-13	chr10	22725491	22726764	22725491	FALSE	TRUE
chr10_22764708_22767050	0.58577	0.608321	0.0225514	11954	0.0571848	9669	506	372	0.147259	0.831918	0.831918	9669	0.215294	chr10	22764708	22767050	22764708	FALSE	TRUE
chr10_23002155_23003790	0.0330449	0.0325992	-0.000445735	5938	-0.0673106	4845	506	372	0.0880207	1.05542	-1.05542	4845	0.140185	chr10	23002155	23003790	23002155	FALSE	FALSE
chr10_23384533_23385078	0.0377941	0.037359	-0.000435125	5981	0.000690637	8130	506	372	0.986141	0.00606092	0.00606092	8130	0.990528	chr10	23384533	23385078	23384533	FALSE	FALSE
chr10_23462224_23463889	0.363536	0.234275	-0.129261	204	-0.261103	667.5	506	372	3.64477e-11	10.4383	-10.4383	667.5	3.57019e-10	chr10	23462224	23463889	23462224	FALSE	TRUE
chr10_23480697_23482455	0.245547	0.17617	-0.0693767	603	-0.210315	1121	506	372	9.79156e-08	7.00915	-7.00915	1121	5.48578e-07	chr10	23480697	23482455	23480697	FALSE	TRUE
chr10_23727836_23729523	0.0341548	0.0350378	0.000882931	9346	0.0711569	9946	506	372	0.071322	1.14678	1.14678	9946	0.117115	chr10	23727836	23729523	23727836	FALSE	FALSE
chr10_23983366_23984978	0.096058	0.049223	-0.0468349	944	-0.302637	419	506	372	1.71235e-14	13.7664	-13.7664	419	2.79485e-13	chr10	23983366	23984978	23983366	FALSE	TRUE
chr10_25011963_25013816	0.0268915	0.0287659	0.00187447	9922	0.122583	10911	506	372	0.00189077	2.72336	2.72336	10911	0.00487521	chr10	25011963	25013816	25011963	FALSE	FALSE
chr10_25241110_25241900	0.0527346	0.0562628	0.00352818	10445	0.134228	11137.5	506	372	0.000668861	3.17466	3.17466	11137.5	0.0019185	chr10	25241110	25241900	25241110	FALSE	TRUE
chr10_25305318_25306024	0.0363819	0.0366689	0.000287082	8522	0.0442645	9405	506	372	0.261946	0.581788	0.581788	9405	0.34756	chr10	25305318	25306024	25305318	FALSE	FALSE
chr10_25463756_25465639	0.175744	0.0655176	-0.110226	294	-0.448308	36	506	372	6.40704e-30	29.1933	-29.1933	36	1.31509e-27	chr10	25463756	25465639	25463756	FALSE	TRUE
chr10_26500607_26501126	0.410626	0.425047	0.0144211	11553	0.0259255	8937.5	506	372	0.511196	0.291413	0.291413	8937.5	0.596277	chr10	26500607	26501126	26500607	FALSE	TRUE
chr10_26504383_26507434	0.218887	0.188377	-0.0305098	1309	-0.135949	2266	506	372	0.000569661	3.24438	-3.24438	2265	0.00166391	chr10	26504383	26507434	26504383	FALSE	TRUE
chr10_26727061_26727992	0.149287	0.172422	0.0231343	11976	0.0301649	9048	506	372	0.44461	0.35202	0.35202	9048	0.532879	chr10	26727061	26727992	26727061	FALSE	TRUE
chr10_26986142_26987088	0.0257119	0.0255051	-0.0002068	6887	-0.0265364	6970	506	372	0.501289	0.299912	-0.299912	6970	0.587251	chr10	26986142	26987088	26986142	FALSE	FALSE
chr10_27149166_27150229	0.0425823	0.0424486	-0.000133678	7172	-0.0338731	6603.5	506	372	0.390661	0.4082	-0.4082	6603.5	0.481073	chr10	27149166	27150229	27149166	FALSE	FALSE
chr10_27389075_27389622	0.0316863	0.0314418	-0.000244528	6731	-0.0290174	6855	506	372	0.462129	0.335237	-0.335237	6855	0.549645	chr10	27389075	27389622	27389075	FALSE	FALSE
chr10_27443030_27443405	0.0307465	0.0303228	-0.00042375	6012	-0.0224085	7178	506	372	0.570146	0.244014	-0.244014	7178	0.64993	chr10	27443030	27443405	27443030	FALSE	FALSE
chr10_27529218_27530102	0.0477638	0.043458	-0.00430585	2834	-0.236527	864	506	372	2.03569e-09	8.69129	-8.69129	864	1.51775e-08	chr10	27529218	27530102	27529218	FALSE	FALSE
chr10_27530938_27531363	0.0315739	0.032024	0.000450149	8830	0.00776701	8384	506	372	0.844039	0.0736374	0.0736374	8384	0.880231	chr10	27530938	27531363	27530938	FALSE	FALSE
chr10_27541297_27541883	0.430166	0.536058	0.105892	13228	0.237101	12598	506	372	1.86124e-09	8.7302	8.7302	12598	1.39382e-08	chr10	27541297	27541883	27541297	FALSE	FALSE
chr10_27702368_27703378	0.602372	0.593695	-0.00867653	2349	-0.0119958	7641.5	506	372	0.761193	0.118505	-0.118505	7641	0.814332	chr10	27702368	27703378	27702368	FALSE	TRUE
chr10_27793049_27793764	0.0363074	0.0356715	-0.000635907	5290	-0.049949	5771	506	372	0.205555	0.687072	-0.687072	5771	0.284351	chr10	27793049	27793764	27793049	FALSE	FALSE
chr10_28030182_28035211	0.153049	0.152916	-0.000132293	7178	-0.0674168	4838.5	506	372	0.0875204	1.05789	-1.05789	4838.5	0.139487	chr10	28030182	28035211	28030182	FALSE	TRUE
chr10_2815003_2815469	0.566347	0.453887	-0.11246	284	-0.236357	868	506	372	2.09037e-09	8.67978	-8.67978	868	1.55083e-08	chr10	2815003	2815469	2815003	TRUE	TRUE
chr10_28287447_28288057	0.0816308	0.0732917	-0.00833906	2371	-0.0938098	3619	506	372	0.0174263	1.75879	-1.75879	3618	0.0347629	chr10	28287447	28288057	28287447	FALSE	FALSE
chr10_28591622_28592117	0.0258537	0.0259126	5.88894e-05	7888	-0.0419482	6191.5	506	372	0.287739	0.541001	-0.541001	6191.5	0.375025	chr10	28591622	28592117	28591622	FALSE	FALSE
chr10_28821189_28823092	0.0483404	0.048627	0.000286631	8520	-0.00761826	7831	506	372	0.846991	0.0721213	-0.0721213	7831	0.882562	chr10	28821189	28823092	28821189	FALSE	FALSE
chr10_28957408_28958116	0.0473558	0.0620544	0.0146986	11574	0.197713	12089	506	372	5.41055e-07	6.26676	6.26676	12089	2.69969e-06	chr10	28957408	28958116	28957408	FALSE	FALSE
chr10_28965704_28967266	0.058254	0.0561804	-0.00207369	3461	-0.0602661	5208	506	372	0.126666	0.897339	-0.897339	5208	0.190344	chr10	28965704	28967266	28965704	FALSE	FALSE
chr10_29698362_29699044	0.03491	0.0315162	-0.00339384	3010	-0.122965	2604	506	372	0.00182969	2.73762	-2.73762	2604	0.00473664	chr10	29698362	29699044	29698362	FALSE	FALSE
chr10_30024072_30026077	0.051158	0.0561208	0.00496278	10719	0.182838	11894	506	372	3.5846e-06	5.44556	5.44556	11894	1.56596e-05	chr10	30024072	30026077	30024072	FALSE	FALSE
chr10_30637961_30638279	0.0233261	0.023715	0.00038895	8719	0.0258298	8935	506	372	0.512755	0.29009	0.29009	8935	0.597839	chr10	30637961	30638279	30637961	FALSE	FALSE
chr10_30722378_30723707	0.0317414	0.0336848	0.0019434	9955	0.244751	12685	506	372	5.52639e-10	9.25756	9.25756	12685	4.53733e-09	chr10	30722378	30723707	30722378	FALSE	FALSE
chr10_3108650_3111419	0.0657192	0.0977179	0.0319986	12288	0.244443	12678.5	506	372	5.80752e-10	9.23601	9.23601	12678.5	4.73942e-09	chr10	3108650	3111419	3108650	TRUE	FALSE
chr10_31320483_31321553	0.0404679	0.0436586	0.00319065	10350	0.254994	12785	506	372	1.02653e-10	9.98863	9.98863	12785	9.39625e-10	chr10	31320483	31321553	31320483	FALSE	FALSE
chr10_31607227_31610094	0.0439848	0.0494928	0.00550804	10808	0.156934	11501	506	372	6.96301e-05	4.1572	4.1572	11501	0.000244056	chr10	31607227	31610094	31607227	FALSE	FALSE
chr10_3180174_3180578	0.915011	0.919114	0.00410312	10570	0.102735	10554.5	506	372	0.0092195	2.03529	2.03529	10555	0.019907	chr10	3180174	3180578	3180174	TRUE	FALSE
chr10_3214721_3215260	0.0358939	0.0347594	-0.00113445	4282	-0.0560691	5464	506	372	0.155316	0.808785	-0.808785	5464	0.224649	chr10	3214721	3215260	3214721	TRUE	FALSE
chr10_32217353_32218392	0.0456384	0.0450366	-0.000601832	5392	-0.0361203	6479	506	372	0.359993	0.443706	-0.443706	6479	0.450598	chr10	32217353	32218392	32217353	FALSE	FALSE
chr10_32344550_32345570	0.0364211	0.0360991	-0.000322007	6419	-0.00966892	7754	506	372	0.806506	0.0933923	-0.0933923	7754	0.848799	chr10	32344550	32345570	32344550	FALSE	FALSE
chr10_32635217_32636655	0.0212028	0.0212867	8.38432e-05	7975	-0.00457946	7944	506	372	0.907702	0.0420565	-0.0420565	7944	0.930436	chr10	32635217	32636655	32635217	FALSE	FALSE
chr10_33246271_33247707	0.0305245	0.0298947	-0.000629798	5309	-0.0757735	4395	506	372	0.0548028	1.2612	-1.2612	4395	0.0937391	chr10	33246271	33247707	33246271	FALSE	FALSE
chr10_33269511_33269870	0.0672407	0.0674127	0.000172026	8248	-0.0144503	7543	506	372	0.714272	0.146136	-0.146136	7543	0.774657	chr10	33269511	33269870	33269511	FALSE	FALSE
chr10_33623120_33626197	0.0442384	0.0396377	-0.00460075	2792	-0.177016	1522.5	506	372	7.23896e-06	5.14032	-5.14032	1522.5	2.99439e-05	chr10	33623120	33626197	33623120	FALSE	FALSE
chr10_3374119_3374383	0.905536	0.922569	0.0170335	11703	0.233435	12557	506	372	3.28735e-09	8.48315	8.48315	12557	2.35504e-08	chr10	3374119	3374383	3374119	TRUE	TRUE
chr10_35103124_35105243	0.0462605	0.0408214	-0.00543911	2667	-0.253581	735	506	372	1.29999e-10	9.88606	-9.88606	735	1.15709e-09	chr10	35103124	35105243	35103124	FALSE	FALSE
chr10_35378834_35379632	0.0186832	0.0188215	0.000138314	8144	0.00562072	8308	506	372	0.88682	0.0521646	0.0521646	8308	0.913732	chr10	35378834	35379632	35378834	FALSE	FALSE
chr10_35415788_35416685	0.0291377	0.0284341	-0.000703625	5105	-0.0908825	3730	506	372	0.0212568	1.6725	-1.6725	3729	0.0414101	chr10	35415788	35416685	35415788	FALSE	FALSE
chr10_35928501_35931893	0.0783829	0.0850235	0.00664057	10948	0.0784776	10076	506	372	0.0467039	1.33065	1.33065	10076	0.0817862	chr10	35928501	35931893	35928501	FALSE	TRUE
chr10_37414145_37414769	0.872903	0.832215	-0.0406879	1057	-0.202187	1205	506	372	2.98281e-07	6.52537	-6.52537	1205	1.55058e-06	chr10	37414145	37414769	37414145	FALSE	TRUE
chr10_38146502_38147104	0.0455427	0.0450225	-0.000520211	5662	-0.0674168	4838.5	506	372	0.0875204	1.05789	-1.05789	4838.5	0.139487	chr10	38146502	38147104	38146502	FALSE	FALSE
chr10_38265075_38265723	0.0326442	0.0326264	-1.78441e-05	7603	-0.0204854	7278	506	372	0.603697	0.219181	-0.219181	7278	0.679316	chr10	38265075	38265723	38265075	FALSE	FALSE
chr10_3826853_3828126	0.0274388	0.0274503	1.14944e-05	7726	-0.0105189	7718	506	372	0.789869	0.102445	-0.102445	7718	0.835879	chr10	3826853	3828126	3826853	TRUE	FALSE
chr10_38299490_38300099	0.0327186	0.0330221	0.00030347	8563	-0.0237048	7110	506	372	0.548045	0.261184	-0.261184	7110	0.630573	chr10	38299490	38300099	38299490	FALSE	FALSE
chr10_38383200_38383962	0.0411057	0.0412782	0.000172507	8249	-0.0236995	7111	506	372	0.548135	0.261112	-0.261112	7111	0.630623	chr10	38383200	38383962	38383200	FALSE	FALSE
chr10_38691424_38692162	0.114644	0.0982218	-0.0164225	1855	-0.154023	1865	506	372	9.47113e-05	4.0236	-4.0236	1865	0.000324742	chr10	38691424	38692162	38691424	FALSE	FALSE
chr10_391382_394008	0.913794	0.911192	-0.0026024	3247	-0.0273386	6926.5	506	372	0.488438	0.31119	-0.31119	6926.5	0.57513	chr10	391382	394008	391382	TRUE	TRUE
chr10_42737286_42739108	0.524594	0.529663	0.00506878	10738	-0.0102002	7731	506	372	0.796097	0.0990338	-0.0990338	7731	0.840915	chr10	42737286	42739108	42737286	FALSE	TRUE
chr10_42971195_42971834	0.217448	0.130488	-0.0869604	445	-0.265672	636	506	372	1.65464e-11	10.7813	-10.7813	636	1.71765e-10	chr10	42971195	42971834	42971195	FALSE	FALSE
chr10_43047584_43048472	0.0422457	0.041971	-0.000274636	6615	-0.0542734	5567.5	506	372	0.168979	0.772167	-0.772167	5567.5	0.240914	chr10	43047584	43048472	43047584	FALSE	FALSE
chr10_43133523_43134150	0.0223885	0.0224636	7.51261e-05	7941	-0.0381338	6388	506	372	0.333838	0.476464	-0.476464	6388	0.423535	chr10	43133523	43134150	43133523	FALSE	FALSE
chr10_43248523_43250912	0.207079	0.24824	0.0411611	12531	0.170938	11706	506	372	1.47429e-05	4.83142	4.83142	11706	5.78403e-05	chr10	43248523	43250912	43248523	FALSE	TRUE
chr10_43277849_43278532	0.0321425	0.0323221	0.000179619	8268	-0.0330868	6637	506	372	0.401755	0.396039	-0.396039	6637	0.492051	chr10	43277849	43278532	43277849	FALSE	FALSE
chr10_43361552_43362350	0.219458	0.222737	0.00327948	10379	0.0527753	9573	506	372	0.181053	0.742193	0.742193	9573	0.2552	chr10	43361552	43362350	43361552	FALSE	TRUE
chr10_43393476_43394417	0.402215	0.315923	-0.0862922	450	-0.210889	1112.5	506	372	9.03706e-08	7.04397	-7.04397	1112.5	5.10317e-07	chr10	43393476	43394417	43393476	FALSE	TRUE
chr10_43428167_43429460	0.220021	0.22201	0.00198871	9969	-0.0268498	6957	506	372	0.496247	0.304302	-0.304302	6957	0.582351	chr10	43428167	43429460	43428167	FALSE	TRUE
chr10_43571939_43573434	0.0513071	0.0496677	-0.00163941	3717	-0.00788389	7820	506	372	0.841721	0.0748316	-0.0748316	7820	0.878625	chr10	43571939	43573434	43571939	FALSE	TRUE
chr10_43600146_43601165	0.122758	0.140884	0.0181254	11749	0.0566747	9658	506	372	0.150901	0.821307	0.821307	9658	0.21953	chr10	43600146	43601165	43600146	FALSE	TRUE
chr10_43632966_43634222	0.0452758	0.0440516	-0.0012242	4167	-0.0426389	6154	506	372	0.279876	0.553035	-0.553035	6154	0.366468	chr10	43632966	43634222	43632966	FALSE	FALSE
chr10_43697777_43698177	0.203308	0.23082	0.0275112	12136	0.0182966	8723.5	506	372	0.642924	0.19184	0.19184	8723.5	0.713383	chr10	43697777	43698177	43697777	FALSE	FALSE
chr10_43891546_43892917	0.0669044	0.0692209	0.00231651	10072	0.164223	11604	506	372	3.15069e-05	4.50159	4.50159	11604	0.000117099	chr10	43891546	43892917	43891546	FALSE	FALSE
chr10_43902580_43904792	0.0347785	0.0361277	0.00134917	9662	0.123698	10935	506	372	0.00171766	2.76506	2.76506	10935	0.00447828	chr10	43902580	43904792	43902580	FALSE	FALSE
chr10_43931958_43932879	0.08701	0.0883514	0.00134134	9654	0.0548791	9621	506	372	0.164273	0.784433	0.784433	9621	0.235269	chr10	43931958	43932879	43931958	FALSE	FALSE
chr10_44069359_44070179	0.0443341	0.0452695	0.000935454	9383	0.0604467	9743	506	372	0.125532	0.901244	0.901244	9743	0.188786	chr10	44069359	44070179	44069359	FALSE	TRUE
chr10_44101813_44102366	0.0167503	0.0167867	3.63737e-05	7797	0.000600323	8125	506	372	0.987967	0.00525741	0.00525741	8125	0.991848	chr10	44101813	44102366	44101813	FALSE	FALSE
chr10_44143856_44144698	0.0513314	0.0516943	0.000362881	8679	0.0435314	9386	506	372	0.269931	0.568747	0.568747	9386	0.356201	chr10	44143856	44144698	44143856	FALSE	FALSE
chr10_44162850_44163531	0.479828	0.379749	-0.100079	343	-0.212302	1097	506	372	7.41098e-08	7.13012	-7.13012	1097	4.24151e-07	chr10	44162850	44163531	44162850	FALSE	TRUE
chr10_44185039_44186132	0.128498	0.129689	0.00119065	9564	-5.31259e-05	8094	506	372	0.999033	0.000420142	-0.000420142	8094	0.999691	chr10	44185039	44186132	44185039	FALSE	TRUE
chr10_44879714_44882391	0.213807	0.262865	0.0490579	12689	0.0458158	9447	506	372	0.245592	0.609785	0.609785	9447	0.329606	chr10	44879714	44882391	44879714	FALSE	TRUE
chr10_45496275_45496550	0.0229493	0.0226398	-0.000309512	6467	-0.0896128	3768	506	372	0.0231343	1.63574	-1.63574	3767	0.0446884	chr10	45496275	45496550	45496275	FALSE	FALSE
chr10_45693718_45694890	0.731594	0.721694	-0.00990063	2253	-0.027328	6928	506	372	0.488607	0.31104	-0.31104	6928	0.575279	chr10	45693718	45694890	45693718	FALSE	TRUE
chr10_45719712_45720203	0.808752	0.842162	0.0334107	12335	0.139169	11228	506	372	0.000419879	3.37688	3.37688	11228	0.00126459	chr10	45719712	45720203	45719712	FALSE	TRUE
chr10_45868718_45870156	0.0595572	0.0901163	0.0305591	12239	0.356464	13366	506	372	1.64177e-19	18.7847	18.7847	13366	5.76193e-18	chr10	45868718	45870156	45868718	FALSE	TRUE
chr10_45914374_45914883	0.0529856	0.0821248	0.0291392	12194	0.0895597	10299	506	372	0.0232159	1.63422	1.63422	10299	0.0448141	chr10	45914374	45914883	45914374	FALSE	FALSE
chr10_46167677_46168642	0.13736	0.153062	0.0157019	11633	0.203557	12160	506	372	2.47914e-07	6.6057	6.6057	12160	1.30528e-06	chr10	46167677	46168642	46167677	FALSE	FALSE
chr10_46222416_46223287	0.0434799	0.0423547	-0.00112517	4299	-0.0746738	4449	506	372	0.058416	1.23347	-1.23347	4449	0.0989945	chr10	46222416	46223287	46222416	FALSE	FALSE
chr10_465928_466396	0.94542	0.950733	0.00531387	10774	0.167357	11653	506	372	2.21796e-05	4.65405	4.65405	11653	8.46147e-05	chr10	465928	466396	465928	TRUE	TRUE
chr10_46969991_46971557	0.215713	0.204735	-0.0109781	2165	-0.0713162	4638.5	506	372	0.0706904	1.15064	-1.15064	4638.5	0.116233	chr10	46969991	46971557	46969991	FALSE	FALSE
chr10_47655677_47656379	0.0401792	0.0505182	0.010339	11270	0.231788	12536	506	372	4.23298e-09	8.37335	8.37335	12536	2.96966e-08	chr10	47655677	47656379	47655677	FALSE	FALSE
chr10_48354459_48355197	0.0476164	0.0467043	-0.000912078	4649	-0.0952442	3568	506	372	0.0157809	1.80187	-1.80187	3566	0.0318748	chr10	48354459	48355197	48354459	FALSE	FALSE
chr10_48438411_48439320	0.146264	0.0828777	-0.0633862	678	-0.359748	200	506	372	7.6453e-20	19.1166	-19.1166	200	2.78416e-18	chr10	48438411	48439320	48438411	FALSE	TRUE
chr10_4868125_4868949	0.305096	0.45365	0.148554	13385	0.306866	13160	506	372	7.38238e-15	14.1318	14.1318	13160	1.274e-13	chr10	4868125	4868949	4868125	TRUE	TRUE
chr10_49514331_49515400	0.045453	0.0500077	0.00455469	10641	0.168515	11663	506	372	1.94518e-05	4.71104	4.71104	11663	7.47132e-05	chr10	49514331	49515400	49514331	FALSE	FALSE
chr10_49658224_49659201	0.942073	0.944243	0.00216937	10027	0.0747854	10004	506	372	0.0580407	1.23627	1.23627	10004	0.0984939	chr10	49658224	49659201	49658224	FALSE	TRUE
chr10_49674243_49674776	0.495419	0.554732	0.0593133	12838	0.155786	11489	506	372	7.86552e-05	4.10427	4.10427	11489	0.000273426	chr10	49674243	49674776	49674243	FALSE	TRUE
chr10_49731448_49732638	0.0598076	0.0702717	0.0104641	11284	0.0901972	10310	506	372	0.022253	1.65261	1.65261	10310	0.0431645	chr10	49731448	49732638	49731448	FALSE	TRUE
chr10_49812852_49813352	0.0818705	0.0850577	0.00318722	10349	0.0823558	10162.5	506	372	0.0368635	1.4334	1.4334	10162.5	0.0669334	chr10	49812852	49813352	49812852	FALSE	TRUE
chr10_49863620_49864601	0.0482278	0.04234	-0.00588781	2614	-0.0590973	5273	506	372	0.134196	0.872259	-0.872259	5273	0.199688	chr10	49863620	49864601	49863620	FALSE	FALSE
chr10_50339890_50340178	0.682852	0.685651	0.00279886	10236	0.0765226	10039	506	372	0.0524499	1.28026	1.28026	10039	0.0903649	chr10	50339890	50340178	50339890	FALSE	TRUE
chr10_50602989_50606783	0.29568	0.249599	-0.0460802	969	-0.0931404	3649.5	506	372	0.0182444	1.73887	-1.73887	3648.5	0.0361711	chr10	50602989	50606783	50602989	FALSE	TRUE
chr10_50746634_50747329	0.0294858	0.029382	-0.000103794	7284	0.00163628	8162	506	372	0.967026	0.0145619	0.0145619	8162	0.975233	chr10	50746634	50747329	50746634	FALSE	FALSE
chr10_50817601_50820356	0.236952	0.184873	-0.0520791	859	-0.199838	1234	506	372	4.08373e-07	6.38894	-6.38894	1234	2.07666e-06	chr10	50817601	50820356	50817601	FALSE	TRUE
chr10_50887565_50887862	0.208286	0.131819	-0.0764669	526	-0.223161	988	506	372	1.54812e-08	7.8102	-7.8102	988	9.94893e-08	chr10	50887565	50887862	50887565	FALSE	TRUE
chr10_50969658_50970605	0.0742342	0.0589734	-0.0152608	1919	-0.0918654	3694	506	372	0.019896	1.70123	-1.70123	3694	0.0390738	chr10	50969658	50970605	50969658	FALSE	FALSE
chr10_51572198_51572620	0.0540517	0.0526429	-0.00140879	3964	-0.0461877	5976	506	372	0.241781	0.616579	-0.616579	5976	0.325296	chr10	51572198	51572620	51572198	FALSE	FALSE
chr10_51827416_51828287	0.0294288	0.0287315	-0.00069738	5122	-0.102639	3286	506	372	0.0092849	2.03222	-2.03222	3285	0.0200259	chr10	51827416	51828287	51827416	FALSE	FALSE
chr10_52382472_52385155	0.0341556	0.0346253	0.000469729	8857	0.0373794	9240	506	372	0.34349	0.464085	0.464085	9240	0.433467	chr10	52382472	52385155	52382472	FALSE	FALSE
chr10_52499392_52500021	0.0221158	0.0221779	6.20522e-05	7898	-0.0536572	5595	506	372	0.173871	0.759774	-0.759774	5595	0.246796	chr10	52499392	52500021	52499392	FALSE	FALSE
chr10_52833539_52834752	0.0667567	0.0583676	-0.00838913	2365	-0.0962217	3532	506	372	0.0147394	1.83152	-1.83152	3530	0.0300443	chr10	52833539	52834752	52833539	FALSE	FALSE
chr10_53459251_53459759	0.0519939	0.0511896	-0.000804268	4866	-0.0503953	5749	506	372	0.201534	0.695652	-0.695652	5749	0.279617	chr10	53459251	53459759	53459251	FALSE	FALSE
chr10_54073989_54074827	0.101994	0.126424	0.0244304	12025	0.0754707	10017	506	372	0.0557787	1.25353	1.25353	10017	0.0952159	chr10	54073989	54074827	54073989	FALSE	FALSE
chr10_5454431_5454779	0.0448544	0.0352216	-0.00963283	2274	-0.0544222	5556	506	372	0.167814	0.775171	-0.775171	5556	0.23958	chr10	5454431	5454779	5454431	TRUE	FALSE
chr10_5707980_5708798	0.0357136	0.0346869	-0.00102672	4443	-0.109524	3012	506	372	0.00550502	2.25924	-2.25924	3011	0.012722	chr10	5707980	5708798	5707980	TRUE	FALSE
chr10_5726455_5727697	0.0258628	0.0257058	-0.00015701	7087	-0.0530728	5626	506	372	0.178606	0.748104	-0.748104	5626	0.252197	chr10	5726455	5727697	5726455	TRUE	FALSE
chr10_57390343_57391215	0.212432	0.0900684	-0.122364	230	-0.380647	126.5	506	372	5.02074e-22	21.2992	-21.2992	126.5	2.7098e-20	chr10	57390343	57391215	57390343	FALSE	TRUE
chr10_575898_576131	0.954984	0.961869	0.00688469	10969	0.23317	12555	506	372	3.42456e-09	8.46539	8.46539	12555	2.44429e-08	chr10	575898	576131	575898	TRUE	TRUE
chr10_58121059_58121275	0.0384858	0.0371529	-0.00133289	4037	-0.0957754	3550.5	506	372	0.0152071	1.81795	-1.81795	3548.5	0.0308584	chr10	58121059	58121275	58121059	FALSE	FALSE
chr10_5854706_5855965	0.0223775	0.0223341	-4.34425e-05	7504	-0.00399507	7968	506	372	0.919451	0.0364714	-0.0364714	7968	0.93921	chr10	5854706	5855965	5854706	TRUE	FALSE
chr10_5930914_5932389	0.0306437	0.0298995	-0.000744252	5018	-0.110321	2984.5	506	372	0.00517247	2.2863	-2.2863	2984	0.0120377	chr10	5930914	5932389	5930914	TRUE	FALSE
chr10_60027007_60029241	0.0533604	0.052241	-0.00111945	4310	-0.111522	2950.5	506	372	0.00470563	2.32738	-2.32738	2949.5	0.0110538	chr10	60027007	60029241	60027007	FALSE	FALSE
chr10_60144723_60145335	0.0282374	0.028504	0.000266643	8486	0.00981767	8439	506	372	0.803588	0.0949665	0.0949665	8439	0.846912	chr10	60144723	60145335	60144723	FALSE	FALSE
chr10_6018944_6020073	0.0438823	0.045098	0.00121567	9578	0.119714	10861	506	372	0.00241206	2.61761	2.61761	10861	0.00607365	chr10	6018944	6020073	6018944	TRUE	FALSE
chr10_60272467_60273456	0.0431013	0.0348935	-0.00820774	2387	-0.321741	343	506	372	3.49802e-16	15.4562	-15.4562	343	7.12598e-15	chr10	60272467	60273456	60272467	FALSE	FALSE
chr10_60935827_60937049	0.132836	0.0712127	-0.061623	706	-0.26614	631	506	372	1.52506e-11	10.8167	-10.8167	631	1.59168e-10	chr10	60935827	60937049	60935827	FALSE	FALSE
chr10_61122306_61122536	0.0417507	0.0380911	-0.00365964	2942	-0.154161	1862	506	372	9.33499e-05	4.02989	-4.02989	1862	0.000320317	chr10	61122306	61122536	61122306	FALSE	FALSE
chr10_6130786_6131774	0.0309896	0.0309029	-8.67024e-05	7353	-0.0301915	6800	506	372	0.444209	0.352412	-0.352412	6800	0.532587	chr10	6130786	6131774	6130786	TRUE	FALSE
chr10_61468610_61469999	0.0476895	0.045013	-0.00267644	3216	-0.0914616	3716.5	506	372	0.0204455	1.6894	-1.6894	3716.5	0.0399561	chr10	61468610	61469999	61468610	FALSE	FALSE
chr10_61665656_61666794	0.0417729	0.0407635	-0.00100937	4469	-0.052074	5675	506	372	0.18692	0.728343	-0.728343	5675	0.262188	chr10	61665656	61666794	61665656	FALSE	FALSE
chr10_6186520_6187855	0.0325821	0.0330986	0.000516519	8932	0.0592567	9722	506	372	0.13315	0.87566	0.87566	9722	0.198435	chr10	6186520	6187855	6186520	TRUE	FALSE
chr10_6242975_6246457	0.0576726	0.0559504	-0.00172218	3659	-0.0362638	6468.5	506	372	0.358088	0.44601	-0.44601	6469	0.448795	chr10	6242975	6246457	6242975	TRUE	FALSE
chr10_62537970_62538862	0.0503748	0.0502643	-0.000110485	7257	-0.00698606	7844	506	372	0.859559	0.0657243	-0.0657243	7844	0.893253	chr10	62537970	62538862	62537970	FALSE	FALSE
chr10_62703307_62704290	0.046345	0.0442801	-0.00206481	3464	-0.169514	1633	506	372	1.73589e-05	4.76048	-4.76048	1633	6.71887e-05	chr10	62703307	62704290	62703307	FALSE	FALSE
chr10_63422538_63423105	0.143895	0.212748	0.0688524	12931	0.227081	12476	506	372	8.63762e-09	8.06361	8.06361	12476	5.76991e-08	chr10	63422538	63423105	63422538	FALSE	FALSE
chr10_64028041_64028706	0.036498	0.0340245	-0.00247344	3295	-0.122721	2612.5	506	372	0.0018685	2.72851	-2.72851	2612.5	0.00482605	chr10	64028041	64028706	64028041	FALSE	FALSE
chr10_64133789_64134420	0.0547447	0.0388911	-0.0158536	1887	-0.295943	447	506	372	6.33789e-14	13.1981	-13.1981	447	9.49772e-13	chr10	64133789	64134420	64133789	FALSE	TRUE
chr10_64564435_64565818	0.0614089	0.0502876	-0.0111213	2156	-0.221195	1001	506	372	2.06671e-08	7.68472	-7.68472	1001	1.29201e-07	chr10	64564435	64565818	64564435	FALSE	FALSE
chr10_64574660_64578778	0.0742017	0.085526	0.0113242	11344	0.0537103	9599.5	506	372	0.173445	0.760839	0.760839	9599.5	0.246269	chr10	64574660	64578778	64574660	FALSE	TRUE
chr10_64892879_64893336	0.0409699	0.0407671	-0.000202797	6899	0.000435633	8117	506	372	0.991298	0.00379592	0.00379592	8117	0.994013	chr10	64892879	64893336	64892879	FALSE	FALSE
chr10_65224870_65225887	0.0266516	0.0256711	-0.0009805	4512	-0.0827702	4057	506	372	0.035925	1.4446	-1.4446	4057	0.0655014	chr10	65224870	65225887	65224870	FALSE	FALSE
chr10_65280870_65282030	0.042993	0.0435376	0.000544619	8967	0.041417	9334	506	372	0.293889	0.531817	0.531817	9334	0.381498	chr10	65280870	65282030	65280870	FALSE	FALSE
chr10_65389875_65390835	0.0450505	0.0435262	-0.00152428	3823	-0.116144	2807.5	506	372	0.00324343	2.489	-2.489	2806.5	0.00790977	chr10	65389875	65390835	65389875	FALSE	FALSE
chr10_6621907_6622642	0.0380438	0.0364348	-0.00160902	3741	-0.118524	2735.5	506	372	0.00266458	2.57437	-2.57437	2734.5	0.00663792	chr10	6621907	6622642	6621907	TRUE	FALSE
chr10_678262_679515	0.90366	0.915777	0.0121173	11402	0.0865475	10238	506	372	0.0282703	1.54867	1.54867	10238	0.0532358	chr10	678262	679515	678262	TRUE	TRUE
chr10_69523843_69524258	0.0376423	0.0359683	-0.001674	3695	-0.11438	2859	506	372	0.00374394	2.42667	-2.42667	2856	0.00899435	chr10	69523843	69524258	66010489	FALSE	FALSE
chr10_69644169_69645178	0.048509	0.047546	-0.000963014	4547	-0.048164	5859.5	506	372	0.222223	0.653212	-0.653212	5859.5	0.303534	chr10	69644169	69645178	65889569	FALSE	FALSE
chr10_69834413_69835233	0.0322824	0.0319276	-0.000354774	6287	-0.0746897	4448	506	372	0.0583623	1.23387	-1.23387	4448	0.0989158	chr10	69834413	69835233	65699514	FALSE	FALSE
chr10_70091055_70092573	0.0426492	0.0424646	-0.000184573	6977	-0.0425007	6160	506	372	0.281437	0.550619	-0.550619	6160	0.36812	chr10	70091055	70092573	65442174	FALSE	FALSE
chr10_70166206_70167342	0.0285152	0.0285856	7.03894e-05	7928	-0.0292299	6847	506	372	0.458856	0.338324	-0.338324	6847	0.546616	chr10	70166206	70167342	65367405	FALSE	FALSE
chr10_70286960_70287396	0.0470472	0.0461019	-0.000945311	4586	-0.0545763	5552	506	372	0.166614	0.778289	-0.778289	5552	0.238017	chr10	70286960	70287396	65247351	FALSE	FALSE
chr10_70320130_70320822	0.066894	0.0644542	-0.00243981	3306	-0.098028	3459.5	506	372	0.0129733	1.88695	-1.88695	3457.5	0.0268729	chr10	70320130	70320822	65213925	FALSE	FALSE
chr10_70480704_70481598	0.0247983	0.024957	0.000158696	8212	-0.00664074	7861	506	372	0.866439	0.0622618	-0.0622618	7861	0.898473	chr10	70480704	70481598	65053149	FALSE	FALSE
chr10_70586917_70588209	0.0330017	0.0325387	-0.000463028	5868	-0.062678	5082	506	372	0.11217	0.950123	-0.950123	5082	0.172033	chr10	70586917	70588209	64946538	FALSE	FALSE
chr10_70660525_70661473	0.0369531	0.0372991	0.000345945	8647	-0.00752263	7834	506	372	0.84889	0.0711488	-0.0711488	7834	0.884132	chr10	70660525	70661473	64873274	FALSE	FALSE
chr10_70748435_70749334	0.0429155	0.041394	-0.00152147	3830	-0.147956	1981	506	372	0.000176848	3.7524	-3.7524	1981	0.000576042	chr10	70748435	70749334	64785413	FALSE	FALSE
chr10_70939896_70940304	0.0318403	0.0319626	0.000122324	8093	0.00996642	8447	506	372	0.800673	0.0965449	0.0965449	8447	0.844716	chr10	70939896	70940304	64594443	FALSE	FALSE
chr10_71077946_71079377	0.0265865	0.0331755	0.00658905	10939	0.266724	12885.5	506	372	1.37699e-11	10.8611	10.8611	12885	1.45168e-10	chr10	71077946	71079377	64455370	FALSE	FALSE
chr10_711896_712395	0.821908	0.864641	0.0427333	12562	0.137097	11196	506	372	0.000511333	3.2913	3.2913	11196	0.00150982	chr10	711896	712395	711896	TRUE	TRUE
chr10_71211116_71211780	0.06417	0.0941871	0.0300171	12227	0.295805	13090	506	372	6.50943e-14	13.1865	13.1865	13090	9.74401e-13	chr10	71211116	71211780	64322967	FALSE	FALSE
chr10_71331926_71333392	0.132731	0.0952786	-0.0374527	1124	-0.186164	1396	506	372	2.37692e-06	5.62399	-5.62399	1396	1.07191e-05	chr10	71331926	71333392	64201355	FALSE	TRUE
chr10_71337585_71338675	0.134383	0.0916359	-0.0427473	1022	-0.277795	548	506	372	1.90966e-12	11.719	-11.719	548	2.29345e-11	chr10	71337585	71338675	64196072	FALSE	TRUE
chr10_71389862_71390355	0.052532	0.0621408	0.00960879	11226	0.230466	12518	506	372	5.17971e-09	8.28569	8.28569	12518	3.57825e-08	chr10	71389862	71390355	64144392	FALSE	FALSE
chr10_71561302_71562876	0.0727286	0.0813645	0.00863589	11139	0.166603	11644	506	372	2.41482e-05	4.61711	4.61711	11644	9.13532e-05	chr10	71561302	71562876	63971871	FALSE	TRUE
chr10_71812318_71813693	0.0557614	0.0503276	-0.00543379	2668	-0.0743444	4470	506	372	0.059536	1.22522	-1.22522	4470	0.100553	chr10	71812318	71813693	63721054	FALSE	FALSE
chr10_71892092_71892802	0.0772436	0.0861596	0.00891598	11167	0.205948	12192	506	372	1.79054e-07	6.74702	6.74702	12192	9.6065e-07	chr10	71892092	71892802	63641945	FALSE	FALSE
chr10_71905215_71906675	0.0402953	0.0414154	0.00112009	9522	0.0629755	9803	506	372	0.110477	0.95673	0.95673	9804	0.169801	chr10	71905215	71906675	63628072	FALSE	FALSE
chr10_71992414_71993467	0.0373582	0.0367109	-0.000647336	5257	-0.0506821	5736	506	372	0.198979	0.701192	-0.701192	5736	0.276582	chr10	71992414	71993467	63541280	FALSE	FALSE
chr10_72141560_72142637	0.0302086	0.0274729	-0.00273571	3197	-0.162098	1735	506	372	3.98358e-05	4.39973	-4.39973	1735	0.00014546	chr10	72141560	72142637	63392110	FALSE	FALSE
chr10_72163717_72164573	0.0240559	0.0235847	-0.00047119	5838	-0.071805	4605	506	372	0.0687819	1.16253	-1.16253	4605	0.11366	chr10	72163717	72164573	63370174	FALSE	FALSE
chr10_72200065_72201368	0.183785	0.190375	0.00659055	10941	0.0314718	9079	506	372	0.425128	0.37148	0.37148	9079	0.514399	chr10	72200065	72201368	63333379	FALSE	TRUE
chr10_72237661_72238821	0.0808441	0.0907601	0.00991593	11247	0.106687	10643	506	372	0.00685127	2.16423	2.16423	10643	0.0154382	chr10	72237661	72238821	63295926	FALSE	TRUE
chr10_72432242_72432738	0.0629011	0.0458333	-0.0170678	1824	-0.198117	1249	506	372	5.13003e-07	6.28988	-6.28988	1249	2.57681e-06	chr10	72432242	72432738	63102009	FALSE	TRUE
chr10_72575513_72576302	0.0474225	0.0459174	-0.00150509	3849	-0.0465914	5952.5	506	372	0.23769	0.62399	-0.62399	5952.5	0.320683	chr10	72575513	72576302	62958445	FALSE	FALSE
chr10_72972075_72973895	0.0480217	0.0380964	-0.00992526	2252	-0.151398	1912	506	372	0.000124426	3.90509	-3.90509	1912	0.000418368	chr10	72972075	72973895	62560852	FALSE	TRUE
chr10_73156164_73157954	0.105452	0.112261	0.00680864	10964	-0.0416295	6213.5	506	372	0.291419	0.535483	-0.535483	6214	0.3788	chr10	73156164	73157954	62376793	FALSE	TRUE
chr10_73533091_73533492	0.0315378	0.0377193	0.0061815	10891	0.283884	13018	506	372	6.23511e-13	12.2052	12.2052	13018	8.15318e-12	chr10	73533091	73533492	62001255	FALSE	FALSE
chr10_73610661_73611145	0.0650037	0.0641809	-0.000822805	4824	-0.0598198	5230.5	506	372	0.129502	0.887725	-0.887725	5230.5	0.193916	chr10	73610661	73611145	61923602	FALSE	FALSE
chr10_73723711_73724770	0.116091	0.0893348	-0.026756	1429	-0.211919	1103	506	372	7.82075e-08	7.10675	-7.10675	1103	4.46096e-07	chr10	73723711	73724770	61809977	FALSE	FALSE
chr10_73767156_73768379	0.887856	0.902337	0.0144808	11557	0.213736	12302	506	372	6.05167e-08	7.21812	7.21812	12302	3.51402e-07	chr10	73767156	73768379	61766368	FALSE	FALSE
chr10_73846806_73848233	0.21255	0.343599	0.131049	13331	0.227868	12492	506	372	7.67489e-09	8.11493	8.11493	12492	5.18562e-08	chr10	73846806	73848233	61686514	FALSE	FALSE
chr10_74033167_74034698	0.0770033	0.0693133	-0.00768994	2440	-0.185622	1407	506	372	2.54267e-06	5.59471	-5.59471	1407	1.13982e-05	chr10	74033167	74034698	61500049	FALSE	FALSE
chr10_74057609_74058037	0.0374208	0.0328532	-0.00456759	2799	-0.129659	2414	506	372	0.00101537	2.99337	-2.99337	2413	0.00279692	chr10	74057609	74058037	61476710	FALSE	FALSE
chr10_74079336_74079861	0.0376093	0.040208	0.00259864	10173	0.16095	11551	506	372	4.51628e-05	4.34522	4.34522	11551	0.000163326	chr10	74079336	74079861	61454886	FALSE	FALSE
chr10_74113815_74114792	0.0469921	0.0444107	-0.00258143	3261	-0.212907	1093	506	372	6.80437e-08	7.16721	-7.16721	1093	3.92084e-07	chr10	74113815	74114792	61419955	FALSE	FALSE
chr10_74451828_74452597	0.0508757	0.049405	-0.00147074	3885	-0.0748438	4432.5	506	372	0.0578449	1.23774	-1.23774	4432.5	0.0982478	chr10	74451828	74452597	61082150	FALSE	FALSE
chr10_7449376_7455339	0.139569	0.133111	-0.00645779	2555	-0.10792	3065	506	372	0.00623371	2.20525	-2.20525	3064	0.0142025	chr10	7449376	7455339	7449376	TRUE	TRUE
chr10_74855858_74856985	0.0288299	0.0285526	-0.000277258	6605	-0.0256279	7020	506	372	0.516056	0.287303	-0.287303	7020	0.600654	chr10	74855858	74856985	60677762	FALSE	FALSE
chr10_74927642_74928063	0.0251265	0.0248235	-0.000302922	6490	-0.054826	5536	506	372	0.164682	0.783353	-0.783353	5536	0.235755	chr10	74927642	74928063	60606684	FALSE	FALSE
chr10_75006629_75007184	0.0282536	0.0282814	2.78056e-05	7769	-0.00408538	7964	506	372	0.917634	0.0373304	-0.0373304	7964	0.937778	chr10	75006629	75007184	60527563	FALSE	FALSE
chr10_75012126_75012531	0.0389851	0.0371651	-0.00181995	3589	-0.107824	3069	506	372	0.00627977	2.20206	-2.20206	3068	0.0142978	chr10	75012126	75012531	60522216	FALSE	FALSE
chr10_75118205_75118679	0.0370596	0.0368552	-0.000204321	6897	-0.0241935	7095.5	506	372	0.539823	0.267748	-0.267748	7095.5	0.622329	chr10	75118205	75118679	60416068	FALSE	FALSE
chr10_75173411_75173950	0.0314646	0.0315805	0.000115901	8074	-0.00567385	7906	506	372	0.885756	0.0526857	-0.0526857	7906	0.912984	chr10	75173411	75173950	60360797	FALSE	FALSE
chr10_75255033_75255808	0.028526	0.028446	-8.00174e-05	7373	-0.0325662	6667	506	372	0.409204	0.38806	-0.38806	6667	0.499099	chr10	75255033	75255808	60278939	FALSE	FALSE
chr10_75385082_75385994	0.0385678	0.0388194	0.000251539	8445	0.0428726	9364	506	372	0.277247	0.557133	0.557133	9364	0.363835	chr10	75385082	75385994	60148753	FALSE	FALSE
chr10_75489947_75490554	0.0621966	0.0600229	-0.00217372	3403	-0.131731	2370	506	372	0.00084157	3.07491	-3.07491	2368	0.00235943	chr10	75489947	75490554	60044193	FALSE	FALSE
chr10_75531970_75532817	0.0415589	0.0410705	-0.0004884	5771	-0.0779517	4289	506	372	0.0481951	1.317	-1.317	4289	0.0840281	chr10	75531970	75532817	60001930	FALSE	FALSE
chr10_75541557_75542206	0.0659713	0.0666205	0.000649258	9098	-0.00874453	7789	506	372	0.824699	0.0837048	-0.0837048	7789	0.864319	chr10	75541557	75542206	59992541	FALSE	FALSE
chr10_75545264_75546124	0.0283156	0.0283942	7.85626e-05	7957	-0.019051	7357	506	372	0.629284	0.201153	-0.201153	7357.5	0.700889	chr10	75545264	75546124	59988623	FALSE	FALSE
chr10_75570928_75571809	0.038605	0.0387731	0.000168171	8233	0.00216754	8181.5	506	372	0.956294	0.0194084	0.0194084	8181.5	0.967002	chr10	75570928	75571809	59962938	FALSE	FALSE
chr10_75633600_75634796	0.0781572	0.0782162	5.90533e-05	7890	0.0190722	8745	506	372	0.628902	0.201417	0.201417	8745	0.700751	chr10	75633600	75634796	59899951	FALSE	FALSE
chr10_75670696_75671379	0.071503	0.0752713	0.00376834	10499	0.154724	11472	506	372	8.79884e-05	4.05557	4.05557	11472	0.000303148	chr10	75670696	75671379	59863368	FALSE	FALSE
chr10_75757484_75758227	0.023776	0.0239727	0.000196736	8313	0.0448595	9422	506	372	0.255587	0.592462	0.592462	9422	0.340623	chr10	75757484	75758227	59776520	FALSE	FALSE
chr10_75910836_75911480	0.0400547	0.0401145	5.97872e-05	7892	-0.0279442	6904	506	372	0.478855	0.319796	-0.319796	6904	0.565616	chr10	75910836	75911480	59623267	FALSE	FALSE
chr10_75936217_75936726	0.0574425	0.0573446	-9.78485e-05	7323	0.00608823	8330	506	372	0.877469	0.0567684	0.0567684	8330	0.906648	chr10	75936217	75936726	59598021	FALSE	FALSE
chr10_76584625_76586746	0.0488402	0.0473303	-0.0015099	3840	-0.0325024	6670	506	372	0.410122	0.387087	-0.387087	6670	0.500038	chr10	76584625	76586746	58948001	FALSE	FALSE
chr10_76871055_76871620	0.0378622	0.0376575	-0.000204705	6894	-0.0366569	6457	506	372	0.3529	0.452348	-0.452348	6457	0.443277	chr10	76871055	76871620	58663127	FALSE	FALSE
chr10_76969992_76971002	0.0337597	0.0330336	-0.000726037	5056	-0.0835777	4029	506	372	0.0341545	1.46655	-1.46655	4029	0.062585	chr10	76969992	76971002	58563745	FALSE	FALSE
chr10_76993892_76995953	0.0498364	0.0519605	0.00212409	10012	0.182031	11884	506	372	3.95654e-06	5.40268	5.40268	11884	1.71518e-05	chr10	76993892	76995953	58538794	FALSE	FALSE
chr10_77155128_77169600	0.316626	0.35645	0.0398234	12498	0.337732	13290	506	372	1.12776e-17	16.9478	16.9478	13290	2.93803e-16	chr10	77155128	77169600	58365147	FALSE	FALSE
chr10_7829588_7830517	0.0378505	0.0378225	-2.80216e-05	7562	-0.0419057	6195.5	506	372	0.288228	0.540264	-0.540264	6195	0.375517	chr10	7829588	7830517	7829588	TRUE	FALSE
chr10_7860261_7861107	0.0512623	0.051289	2.66917e-05	7766	-0.0258192	7007	506	372	0.512929	0.289943	-0.289943	7007	0.59799	chr10	7860261	7861107	7860261	TRUE	FALSE
chr10_79396095_79398495	0.204326	0.192643	-0.0116821	2118	-0.119926	2685	506	372	0.00236935	2.62537	-2.62537	2684	0.00597943	chr10	79396095	79398495	56136252	FALSE	TRUE
chr10_79789138_79789441	0.046262	0.0476182	0.00135624	9665	0.049524	9514	506	372	0.209439	0.678943	0.678943	9514	0.288839	chr10	79789138	79789441	55745306	FALSE	FALSE
chr10_79793494_79793952	0.0352933	0.0352433	-5.0012e-05	7478	0.0455183	9440.5	506	372	0.248672	0.604373	0.604373	9440.5	0.333145	chr10	79793494	79793952	55740795	FALSE	FALSE
chr10_80062780_80063588	0.15522	0.177268	0.022048	11927	0.184974	11922	506	372	2.75551e-06	5.5598	5.5598	11922	1.22752e-05	chr10	80062780	80063588	55471159	FALSE	FALSE
chr10_8077829_8078378	0.373429	0.258185	-0.115244	271	-0.309947	391	506	372	3.97062e-15	14.4011	-14.4011	391	7.06832e-14	chr10	8077829	8078378	8077829	TRUE	TRUE
chr10_80827070_80830537	0.0644409	0.0624115	-0.00202941	3487	-0.162183	1733	506	372	3.94659e-05	4.40378	-4.40378	1733	0.000144226	chr10	80827070	80830537	54704210	FALSE	FALSE
chr10_8091374_8098329	0.179566	0.167228	-0.0123384	2074	-0.0852777	3954	506	372	0.0306697	1.51329	-1.51329	3954	0.0570325	chr10	8091374	8098329	8091374	TRUE	TRUE
chr10_81002109_81003687	0.291289	0.501879	0.21059	13469	0.293234	13073	506	372	1.06781e-13	12.9715	12.9715	13073	1.55211e-12	chr10	81002109	81003687	54531060	FALSE	TRUE
chr10_81107082_81107488	0.0698979	0.0702979	0.00039994	8740	0.0399294	9297.5	506	372	0.311574	0.506439	0.506439	9297.5	0.400236	chr10	81107082	81107488	54427259	FALSE	FALSE
chr10_81205001_81205811	0.0384782	0.0386693	0.0001911	8297	-2.12504e-05	8096.5	506	372	0.999678	0.000140002	-0.000140002	8096.5	0.999893	chr10	81205001	81205811	54328936	FALSE	FALSE
chr10_81664389_81665076	0.0593638	0.0568096	-0.00255419	3272	-0.027753	6910	506	372	0.48187	0.31707	-0.31707	6910	0.568632	chr10	81664389	81665076	53869671	FALSE	FALSE
chr10_81838359_81839078	0.0388067	0.0385458	-0.000260901	6666	-0.0732075	4533	506	372	0.0635394	1.19696	-1.19696	4533	0.106202	chr10	81838359	81839078	53695669	FALSE	FALSE
chr10_81964681_81965558	0.0320658	0.0353808	0.00331501	10388	0.29929	13112	506	372	3.30603e-14	13.4807	13.4807	13112	5.15977e-13	chr10	81964681	81965558	53569189	FALSE	FALSE
chr10_82116202_82117120	0.131576	0.225625	0.0940486	13155	0.0959667	10424	506	372	0.0150051	1.82376	1.82376	10424	0.0304941	chr10	82116202	82117120	53417627	FALSE	TRUE
chr10_82168064_82168917	0.0523899	0.0522726	-0.000117205	7233	0.0197522	8767.5	506	372	0.616717	0.209914	0.209914	8767	0.690582	chr10	82168064	82168917	53365830	FALSE	FALSE
chr10_82213556_82214760	0.0562503	0.0569945	0.00074413	9205	0.0845977	10199.5	506	372	0.0320251	1.49451	1.49451	10199.5	0.0591553	chr10	82213556	82214760	53319987	FALSE	FALSE
chr10_83633820_83635729	0.153475	0.0819091	-0.0715659	575	-0.286689	489	506	372	3.69366e-13	12.4325	-12.4325	489	4.9988e-12	chr10	83633820	83635729	51899018	FALSE	TRUE
chr10_85899058_85899640	0.0485272	0.0485857	5.85243e-05	7887	0.00805389	8393	506	372	0.838353	0.0765732	0.0765732	8393	0.875649	chr10	85899058	85899640	49635107	FALSE	FALSE
chr10_85954199_85955303	0.0862961	0.0904508	0.00415476	10581	-0.0233967	7130	506	372	0.55326	0.257071	-0.257071	7130	0.634956	chr10	85954199	85955303	49579444	FALSE	TRUE
chr10_88022640_88023279	0.478238	0.336886	-0.141352	165	-0.255244	714	506	372	9.8445e-11	10.0068	-10.0068	714	9.07235e-10	chr10	88022640	88023279	47511468	FALSE	TRUE
chr10_88122924_88127364	0.172691	0.253515	0.0808237	13041	0.265035	12872	506	372	1.84885e-11	10.7331	10.7331	12872	1.90177e-10	chr10	88122924	88127364	47407383	FALSE	TRUE
chr10_88280635_88282089	0.0303823	0.0300709	-0.000311371	6461	-0.0371988	6433	506	372	0.345828	0.46114	-0.46114	6433	0.436091	chr10	88280635	88282089	47252658	FALSE	FALSE
chr10_88470905_88471934	0.0459538	0.0499241	0.00397033	10541	0.204673	12179	506	372	2.13081e-07	6.67145	6.67145	12179	1.13334e-06	chr10	88470905	88471934	47062813	FALSE	FALSE
chr10_88515426_88517217	0.0338749	0.0329598	-0.000915173	4647	-0.0843746	3994	506	372	0.032481	1.48837	-1.48837	3994	0.0599237	chr10	88515426	88517217	47017530	FALSE	FALSE
chr10_88702315_88703322	0.893686	0.9093	0.0156139	11627	0.182254	11888	506	372	3.85023e-06	5.41451	5.41451	11888	1.67337e-05	chr10	88702315	88703322	46831425	FALSE	TRUE
chr10_88728039_88728720	0.206793	0.356239	0.149446	13386	0.212472	12280	506	372	7.23561e-08	7.14052	7.14052	12280	4.14815e-07	chr10	88728039	88728720	46806027	FALSE	TRUE
chr10_88730554_88731632	0.0791743	0.13167	0.0524952	12750	0.228314	12496	506	372	7.17577e-09	8.14413	8.14413	12496	4.86294e-08	chr10	88730554	88731632	46803115	FALSE	TRUE
chr10_88853757_88855498	0.0774772	0.0604251	-0.0170521	1825	-0.116856	2784.5	506	372	0.0030593	2.51438	-2.51438	2783.5	0.00751211	chr10	88853757	88855498	46679249	FALSE	FALSE
chr10_89101402_89103018	0.0662615	0.0679337	0.00167215	9822	0.0924072	10353.5	506	372	0.0191788	1.71718	1.71718	10353	0.0378242	chr10	89101402	89103018	46431729	FALSE	FALSE
chr10_89264370_89265371	0.0223797	0.021944	-0.000435648	5976	-0.0544647	5554	506	372	0.167482	0.776031	-0.776031	5554	0.239182	chr10	89264370	89265371	46269376	FALSE	FALSE
chr10_89419346_89420027	0.0451341	0.0482963	0.00316219	10341	0.174784	11770	506	372	9.42401e-06	5.02576	5.02576	11770	3.835e-05	chr10	89419346	89420027	46114720	FALSE	FALSE
chr10_89577481_89578287	0.0323624	0.0322805	-8.19415e-05	7370	-0.0420226	6188	506	372	0.286885	0.542291	-0.542291	6188	0.374092	chr10	89577481	89578287	45956460	FALSE	FALSE
chr10_89621772_89624128	0.0365887	0.0446649	0.00807622	11081	0.321922	13229	506	372	3.36796e-16	15.4726	15.4726	13229	6.913e-15	chr10	89621772	89624128	45910619	FALSE	FALSE
chr10_90342528_90343221	0.0506017	0.0538864	0.00328469	10381	0.0597029	9731	506	372	0.130252	0.885215	0.885215	9731	0.194889	chr10	90342528	90343221	45191526	FALSE	TRUE
chr10_90639787_90640623	0.030251	0.0301943	-5.66877e-05	7452.5	-0.0197894	7317	506	372	0.616053	0.210382	-0.210382	7317	0.689953	chr10	90639787	90640623	44894124	FALSE	FALSE
chr10_90750293_90751108	0.0339195	0.0355875	0.00166807	9820	0.200083	12119	506	372	3.95301e-07	6.40307	6.40307	12119	2.01549e-06	chr10	90750293	90751108	44783639	FALSE	FALSE
chr10_90967555_90967900	0.0560826	0.0615303	0.00544774	10798	0.0574185	9674	506	372	0.145612	0.836802	0.836802	9674	0.213255	chr10	90967555	90967900	44566847	FALSE	FALSE
chr10_91011325_91011864	0.0290885	0.028802	-0.000286501	6555.5	-0.0369119	6440	506	372	0.349561	0.456477	-0.456477	6440	0.440102	chr10	91011325	91011864	44522883	FALSE	FALSE
chr10_91294947_91295925	0.0987876	0.112083	0.013295	11485	0.0233117	8871	506	372	0.554703	0.255939	0.255939	8871	0.636234	chr10	91294947	91295925	44238822	FALSE	FALSE
chr10_91460899_91461615	0.0377018	0.0376379	-6.3885e-05	7432	-0.035435	6514	506	372	0.369181	0.43276	-0.43276	6514	0.45989	chr10	91460899	91461615	44073132	FALSE	FALSE
chr10_91596974_91597792	0.133581	0.157797	0.0242158	12017	0.0580985	9692	506	372	0.140902	0.851084	0.851084	9692	0.207975	chr10	91596974	91597792	43936955	FALSE	TRUE
chr10_92616820_92618034	0.152544	0.166839	0.014295	11546	0.0460177	9451	506	372	0.243518	0.613469	0.613469	9451	0.327146	chr10	92616820	92618034	42916713	FALSE	TRUE
chr10_93169487_93170573	0.0331307	0.0320033	-0.0011274	4296	-0.0977676	3469	506	372	0.0132157	1.87891	-1.87891	3467	0.0273207	chr10	93169487	93170573	42364174	FALSE	FALSE
chr10_93392667_93393147	0.0489721	0.0373332	-0.0116389	2123	-0.194611	1288	506	372	8.11784e-07	6.09056	-6.09056	1288	3.94449e-06	chr10	93392667	93393147	42141600	FALSE	FALSE
chr10_93557970_93558699	0.0352292	0.0346488	-0.000580408	5457	-0.0860003	3913	506	372	0.0292838	1.53337	-1.53337	3913	0.0548772	chr10	93557970	93558699	41976048	FALSE	FALSE
chr10_93683430_93683839	0.0255264	0.0246168	-0.000909623	4653	-0.138542	2198	506	372	0.000445797	3.35086	-3.35086	2198	0.00133228	chr10	93683430	93683839	41850908	FALSE	FALSE
chr10_94050423_94051412	0.035716	0.036007	0.000291012	8531	0.0109758	8485	506	372	0.780966	0.107368	0.107368	8485	0.828744	chr10	94050423	94051412	41483335	FALSE	FALSE
chr10_94333247_94334467	0.0456383	0.0461478	0.000509474	8920	0.0349462	9178	506	372	0.375822	0.425017	0.425017	9178	0.466532	chr10	94333247	94334467	41200280	FALSE	FALSE
chr10_94352667_94353159	0.0266657	0.0270245	0.000358811	8673	0.0164053	8666	506	372	0.677646	0.168997	0.168997	8666	0.743808	chr10	94352667	94353159	41181588	FALSE	FALSE
chr10_94448693_94450479	0.100176	0.204964	0.104788	13222	0.215266	12317	506	372	4.86848e-08	7.31261	7.31261	12317	2.87128e-07	chr10	94448693	94450479	41084268	FALSE	FALSE
chr10_94459254_94459591	0.0500942	0.0469549	-0.00313933	3074	-0.0896553	3767	506	372	0.0230692	1.63697	-1.63697	3766	0.0445817	chr10	94459254	94459591	41075156	FALSE	TRUE
chr10_94526_95301	0.757799	0.746339	-0.0114598	2136	-0.0464427	5960.5	506	372	0.239191	0.621255	-0.621255	5960.5	0.322452	chr10	94526	95301	94526	TRUE	TRUE
chr10_94608037_94609039	0.024681	0.0248115	0.000130536	8118	-0.0336234	6612	506	372	0.394164	0.404323	-0.404323	6612	0.484857	chr10	94608037	94609039	40925708	FALSE	FALSE
chr10_94820026_94823252	0.596804	0.638192	0.0413877	12540	0.131062	11076	506	372	0.000894448	3.04844	3.04844	11076	0.00249683	chr10	94820026	94823252	40711495	FALSE	TRUE
chr10_94825546_94826320	0.379754	0.464066	0.0843114	13073	0.161482	11564.5	506	372	4.26176e-05	4.37041	4.37041	11564.5	0.000154949	chr10	94825546	94826320	40708427	FALSE	TRUE
chr10_94833272_94835256	0.131513	0.115645	-0.0158682	1885	-0.0613179	5157	506	372	0.120174	0.920189	-0.920189	5157	0.182103	chr10	94833272	94835256	40699491	FALSE	TRUE
chr10_95256133_95256562	0.0440503	0.0437484	-0.000301883	6498	-0.0322793	6682.5	506	372	0.413344	0.383689	-0.383689	6682	0.503106	chr10	95256133	95256562	40278185	FALSE	FALSE
chr10_95326229_95327108	0.0972878	0.0774809	-0.0198069	1703	-0.0887734	3787	506	372	0.0244531	1.61167	-1.61167	3786	0.0470148	chr10	95326229	95327108	40207639	FALSE	TRUE
chr10_95360389_95361387	0.116272	0.0914429	-0.0248295	1504	-0.122349	2624	506	372	0.00192902	2.71466	-2.71466	2624	0.00496531	chr10	95360389	95361387	40173360	FALSE	FALSE
chr10_95462160_95462500	0.0370072	0.0368984	-0.000108819	7265	-0.0195185	7327	506	372	0.620894	0.206983	-0.206983	7327	0.694284	chr10	95462160	95462500	40072247	FALSE	FALSE
chr10_95653641_95654181	0.0262427	0.0262792	3.64855e-05	7800	-0.0109971	7703	506	372	0.780552	0.107598	-0.107598	7703	0.828435	chr10	95653641	95654181	39880566	FALSE	FALSE
chr10_96162023_96163327	0.0357341	0.0338127	-0.00192135	3535	-0.170917	1612.5	506	372	1.47791e-05	4.83035	-4.83035	1612.5	5.79317e-05	chr10	96162023	96163327	39371420	FALSE	FALSE
chr10_96305116_96305893	0.0346503	0.0350282	0.00037789	8706	-0.0166072	7450.5	506	372	0.673906	0.171401	-0.171401	7450.5	0.740662	chr10	96305116	96305893	39228854	FALSE	FALSE
chr10_97050185_97051124	0.0523869	0.0547629	0.00237598	10092	0.221333	12385	506	372	2.02534e-08	7.6935	7.6935	12385	1.26907e-07	chr10	97050185	97051124	38483623	FALSE	FALSE
chr10_97320424_97321483	0.0377114	0.0373425	-0.000368945	6224	-0.0682987	4793	506	372	0.0834557	1.07854	-1.07854	4793	0.133859	chr10	97320424	97321483	38213264	FALSE	FALSE
chr10_97415860_97416726	0.0286393	0.028893	0.000253726	8452	0.0433614	9377	506	372	0.271807	0.56574	0.56574	9377	0.358048	chr10	97415860	97416726	38118021	FALSE	FALSE
chr10_97453478_97454013	0.034896	0.0339156	-0.000980429	4514	-0.0901335	3748	506	372	0.0223477	1.65077	-1.65077	3747	0.043342	chr10	97453478	97454013	38080734	FALSE	FALSE
chr10_97667243_97667978	0.0644581	0.0641054	-0.000352651	6300	-0.0434889	6107	506	372	0.270399	0.567994	-0.567994	6107	0.356575	chr10	97667243	97667978	37866769	FALSE	FALSE
chr10_97802871_97804262	0.0941164	0.0937061	-0.000410333	6058	0.0199116	8771	506	372	0.613876	0.211919	0.211919	8771	0.687913	chr10	97802871	97804262	37730485	FALSE	FALSE
chr10_98272207_98273939	0.0459123	0.0537296	0.00781734	11057	0.0945057	10394	506	372	0.0166101	1.77963	1.77963	10394	0.0333556	chr10	98272207	98273939	37260808	FALSE	FALSE
chr10_98346049_98347064	0.049274	0.0492626	-1.14441e-05	7628	-0.0223448	7183.5	506	372	0.571244	0.243178	-0.243178	7183.5	0.650744	chr10	98346049	98347064	37187683	FALSE	FALSE
chr10_98479725_98480487	0.0861548	0.142483	0.0563287	12802	0.228133	12494	506	372	7.37387e-09	8.1323	8.1323	12494	4.9897e-08	chr10	98479725	98480487	37054260	FALSE	FALSE
chr10_98591707_98593273	0.0387895	0.0376877	-0.00110179	4337	-0.0780314	4286	506	372	0.0479666	1.31906	-1.31906	4286	0.0836729	chr10	98591707	98593273	36941474	FALSE	FALSE
chr10_98945062_98946239	0.0839981	0.0722162	-0.0117818	2109	-0.140019	2159.5	506	372	0.000386979	3.41231	-3.41231	2159.5	0.00117306	chr10	98945062	98946239	36588508	FALSE	TRUE
chr10_99051934_99052490	0.0411697	0.0405408	-0.000628911	5315	-0.0416295	6213.5	506	372	0.291419	0.535483	-0.535483	6213	0.3788	chr10	99051934	99052490	36482257	FALSE	FALSE
chr10_99078811_99081048	0.151212	0.185265	0.0340533	12354	0.172256	11727	506	372	1.26607e-05	4.89754	4.89754	11727	5.02827e-05	chr10	99078811	99081048	36453699	FALSE	FALSE
chr10_99093406_99094955	0.0398943	0.0395965	-0.000297803	6516	0.0559735	9645	506	372	0.156021	0.806816	0.806816	9645	0.225573	chr10	99093406	99094955	36439792	FALSE	FALSE
chr10_99160814_99161116	0.0366687	0.036116	-0.000552613	5550	-0.0654086	4938	506	372	0.0973727	1.01156	-1.01156	4938	0.152745	chr10	99160814	99161116	36373631	FALSE	FALSE
chr10_99185778_99186294	0.0352206	0.0328122	-0.00240834	3317	-0.115719	2819.5	506	372	0.00335812	2.4739	-2.4739	2818.5	0.00816301	chr10	99185778	99186294	36348453	FALSE	FALSE
chr10_99205476_99206274	0.057544	0.0580985	0.000554461	8977	0.0229929	8862	506	372	0.56013	0.251711	0.251711	8862	0.641102	chr10	99205476	99206274	36328473	FALSE	FALSE
chr10_99257940_99259520	0.048484	0.0489199	0.000435926	8811	0.0297718	9038	506	372	0.450569	0.346239	0.346239	9038	0.538687	chr10	99257940	99259520	36275227	FALSE	FALSE
chr10_99400263_99400982	0.0407341	0.0406128	-0.000121325	7216	-0.0342981	6578	506	372	0.384742	0.41483	-0.41483	6578	0.47521	chr10	99400263	99400982	36133765	FALSE	FALSE
chr10_99446696_99447400	0.0232443	0.0238411	0.000596836	9044	0.0988355	10477	506	372	0.0122462	1.912	1.912	10477	0.0255387	chr10	99446696	99447400	36087347	FALSE	FALSE
chr10_99473520_99474664	0.0534897	0.0642839	0.0107942	11303	0.193697	12039	506	372	9.13776e-07	6.03916	6.03916	12039	4.41002e-06	chr10	99473520	99474664	36060083	FALSE	FALSE
chr10_99496649_99497451	0.0549856	0.0538713	-0.00111429	4315	-0.0810489	4146	506	372	0.0399614	1.39836	-1.39836	4146	0.0716081	chr10	99496649	99497451	36037296	FALSE	FALSE
chr10_99531025_99531968	0.0591753	0.0730412	0.0138659	11517	0.0273174	8969	506	372	0.488776	0.31089	0.31089	8969	0.575328	chr10	99531025	99531968	36002779	FALSE	FALSE
chr10_99609425_99610116	0.0230425	0.0224379	-0.000604669	5382	-0.0538697	5584	506	372	0.172172	0.764037	-0.764037	5584	0.244899	chr10	99609425	99610116	35924631	FALSE	FALSE
chr10_99789614_99791320	0.207896	0.154942	-0.0529538	849	-0.318979	355	506	372	6.22844e-16	15.2056	-15.2056	355	1.22998e-14	chr10	99789614	99791320	35743427	FALSE	TRUE
chr10_99894265_99894914	0.0252536	0.0266261	0.00137246	9677	0.0896022	10301	506	372	0.0231506	1.63544	1.63544	10301	0.0447072	chr10	99894265	99894914	35639833	FALSE	FALSE
chr11_100557923_100558401	0.0551313	0.0517292	-0.00340218	3007	-0.220016	1010	506	372	2.45506e-08	7.60994	-7.60994	1010	1.51797e-07	chr11	100557923	100558401	34448115	FALSE	FALSE
chr11_100998030_100999774	0.128042	0.130127	0.0020847	10000	0.0312168	9073	506	372	0.42889	0.367654	0.367654	9073	0.517887	chr11	100998030	100999774	34006742	FALSE	TRUE
chr11_101453357_101454684	0.150036	0.121476	-0.0285597	1369	-0.0814846	4118.5	506	372	0.0389051	1.40999	-1.40999	4118.5	0.0700395	chr11	101453357	101454684	33551832	FALSE	TRUE
chr11_101785594_101786128	0.0337041	0.0332302	-0.000473872	5824	-0.00236942	8022.5	506	372	0.952219	0.0212634	-0.0212634	8022.5	0.964248	chr11	101785594	101786128	33220388	FALSE	FALSE
chr11_101918073_101918493	0.0526686	0.0679665	0.0152978	11608	0.217572	12338	506	372	3.49797e-08	7.45618	7.45618	12338	2.10984e-07	chr11	101918073	101918493	33088023	FALSE	FALSE
chr11_101980632_101982330	0.051889	0.053319	0.00142995	9707	0.107421	10657	506	372	0.00647762	2.18858	2.18858	10657	0.0146964	chr11	101980632	101982330	33024186	FALSE	FALSE
chr11_102217574_102218247	0.0339892	0.033503	-0.000486262	5776	-0.0719006	4600	506	372	0.0684135	1.16486	-1.16486	4600	0.113148	chr11	102217574	102218247	32788269	FALSE	FALSE
chr11_102322529_102323762	0.0314413	0.0313897	-5.16027e-05	7470	0.0156721	8646	506	372	0.691298	0.160335	0.160335	8646	0.755608	chr11	102322529	102323762	32682754	FALSE	FALSE
chr11_102962274_102963049	0.0277628	0.0277422	-2.05785e-05	7594	-0.0333578	6627	506	372	0.397911	0.400214	-0.400214	6627	0.488358	chr11	102962274	102963049	32043467	FALSE	FALSE
chr11_10315279_10315933	0.0189748	0.0183219	-0.000652889	5242	-0.105662	3164	506	372	0.00740632	2.1304	-2.1304	3163	0.0164724	chr11	10315279	10315933	10315279	FALSE	FALSE
chr11_10316232_10316469	0.0588433	0.0712436	0.0124002	11419	0.211877	12274	506	372	7.86761e-08	7.10416	7.10416	12274	4.48391e-07	chr11	10316232	10316469	10316232	FALSE	FALSE
chr11_10326048_10326590	0.0415467	0.0420267	0.000479966	8876	0.102565	10551	506	372	0.00933606	2.02984	2.02984	10551	0.0201234	chr11	10326048	10326590	10326048	FALSE	FALSE
chr11_10327013_10329831	0.115425	0.13733	0.0219053	11921	0.223341	12434.5	506	372	1.50737e-08	7.82178	7.82178	12434.5	9.73326e-08	chr11	10327013	10329831	10327013	FALSE	FALSE
chr11_1036420_1036827	0.469436	0.497375	0.0279393	12151	0.117504	10826	506	372	0.0029	2.5376	2.5376	10826	0.00716511	chr11	1036420	1036827	1036420	TRUE	TRUE
chr11_10472000_10472857	0.0538834	0.107397	0.0535133	12765	0.305299	13149	506	372	1.00969e-14	13.9958	13.9958	13149	1.70978e-13	chr11	10472000	10472857	10472000	FALSE	TRUE
chr11_105481126_105481422	0.171646	0.04959	-0.122056	233	-0.413904	73	506	372	9.52556e-26	25.0211	-25.0211	73	9.15197e-24	chr11	105481126	105481422	29525094	FALSE	TRUE
chr11_10562225_10562942	0.0492727	0.0477174	-0.00155532	3787	-0.139264	2176	506	372	0.000416052	3.38085	-3.38085	2176	0.00125417	chr11	10562225	10562942	10562225	FALSE	FALSE
chr11_105892725_105892952	0.0809502	0.0771215	-0.00382866	2906	-0.172181	1594	506	372	1.27704e-05	4.8938	-4.8938	1594	5.0644e-05	chr11	105892725	105892952	29113564	FALSE	FALSE
chr11_105948097_105948830	0.0352196	0.0348678	-0.000351787	6304	-0.069765	4709.5	506	372	0.0770371	1.1133	-1.1133	4709.5	0.125164	chr11	105948097	105948830	29057686	FALSE	FALSE
chr11_106888323_106890203	0.0643126	0.0467518	-0.0175608	1801	-0.223299	985	506	372	1.51687e-08	7.81905	-7.81905	985	9.78523e-08	chr11	106888323	106890203	28116313	FALSE	TRUE
chr11_107328441_107328691	0.0454222	0.0433195	-0.00210264	3441	-0.160334	1761	506	372	4.82957e-05	4.31609	-4.31609	1761	0.00017359	chr11	107328441	107328691	27677825	FALSE	FALSE
chr11_107461743_107462648	0.0315934	0.0280018	-0.00359162	2956	-0.224308	978	506	372	1.30637e-08	7.88393	-7.88393	978	8.52067e-08	chr11	107461743	107462648	27543868	FALSE	FALSE
chr11_10772493_10773089	0.0257859	0.0252833	-0.000502564	5735.5	-0.0899634	3753.5	506	372	0.0226019	1.64585	-1.64585	3752.5	0.043785	chr11	10772493	10773089	10772493	FALSE	FALSE
chr11_107728949_107729586	0.0527767	0.0596718	0.00689511	10970	0.322251	13231	506	372	3.14294e-16	15.5027	15.5027	13231	6.48059e-15	chr11	107728949	107729586	27276930	FALSE	FALSE
chr11_107798958_107799980	0.0592826	0.0485744	-0.0107082	2188	-0.215489	1063	506	372	4.71587e-08	7.32644	-7.32644	1063	2.78978e-07	chr11	107798958	107799980	27206536	FALSE	FALSE
chr11_107879500_107880398	0.0223754	0.0220578	-0.000317572	6434	-0.0263398	6985	506	372	0.504465	0.297169	-0.297169	6985	0.589798	chr11	107879500	107880398	27126118	FALSE	FALSE
chr11_107992004_107992731	0.0304621	0.0319447	0.00148265	9730	0.20208	12144	506	372	3.02574e-07	6.51917	6.51917	12144	1.57109e-06	chr11	107992004	107992731	27013785	FALSE	FALSE
chr11_108093211_108093969	0.0316337	0.0307436	-0.000890113	4687	-0.119725	2694	506	372	0.00240991	2.618	-2.618	2693	0.00606936	chr11	108093211	108093969	26912547	FALSE	FALSE
chr11_10829361_10831121	0.040153	0.0401921	3.91006e-05	7811	-0.0118471	7653	506	372	0.764067	0.116868	-0.116868	7653	0.816311	chr11	10829361	10831121	10829361	FALSE	FALSE
chr11_108368498_108369407	0.0355789	0.0357957	0.000216708	8368	0.12202	10903.5	506	372	0.00198411	2.70243	2.70243	10903.5	0.00508875	chr11	108368498	108369407	26637109	FALSE	FALSE
chr11_108463598_108464103	0.0461508	0.0441532	-0.00199756	3503	-0.0768307	4339	506	372	0.0515069	1.28813	-1.28813	4339	0.0890005	chr11	108463598	108464103	26542413	FALSE	FALSE
chr11_108535584_108536196	0.0432831	0.0423022	-0.000980999	4511	-0.103436	3252	506	372	0.00875232	2.05788	-2.05788	3251	0.0190287	chr11	108535584	108536196	26470320	FALSE	FALSE
chr11_10879102_10880453	0.0328996	0.0325053	-0.00039424	6122	-0.0854796	3940.5	506	372	0.0302769	1.51889	-1.51889	3940.5	0.0564183	chr11	10879102	10880453	10879102	FALSE	FALSE
chr11_109293519_109294983	0.141496	0.100713	-0.0407837	1056	-0.15721	1815	506	372	6.76086e-05	4.17	-4.17	1815	0.000237401	chr11	109293519	109294983	25711533	FALSE	TRUE
chr11_1096272_1096519	0.898344	0.865215	-0.0331292	1227	-0.0862871	3894	506	372	0.0287486	1.54138	-1.54138	3894	0.0540388	chr11	1096272	1096519	1096272	TRUE	TRUE
chr11_109963240_109964677	0.03402	0.033222	-0.00079795	4880	-0.107075	3095	506	372	0.00665127	2.1771	-2.1771	3094	0.0150501	chr11	109963240	109964677	25041839	FALSE	FALSE
chr11_110166564_110167759	0.0295344	0.0289068	-0.000627592	5319	-0.123752	2580	506	372	0.00170979	2.76706	-2.76706	2580	0.00446206	chr11	110166564	110167759	24838757	FALSE	FALSE
chr11_110581839_110583883	0.048925	0.042818	-0.00610708	2591	-0.153693	1871	506	372	9.80338e-05	4.00862	-4.00862	1871	0.000334947	chr11	110581839	110583883	24422633	FALSE	TRUE
chr11_111169304_111170428	0.147697	0.193568	0.0458706	12618	0.183518	11903	506	372	3.29761e-06	5.4818	5.4818	11903	1.449e-05	chr11	111169304	111170428	23836088	FALSE	FALSE
chr11_111383168_111383892	0.130801	0.183617	0.0528155	12752	0.0296018	9029.5	506	372	0.45316	0.343749	0.343749	9029.5	0.540925	chr11	111383168	111383892	23622624	FALSE	TRUE
chr11_111385337_111385712	0.24266	0.283824	0.0411637	12532	0.0901228	10309	506	372	0.0223635	1.65046	1.65046	10309	0.0433603	chr11	111385337	111385712	23620804	FALSE	TRUE
chr11_111410932_111412199	0.301772	0.337966	0.036194	12411	0.0637777	9820	506	372	0.106011	0.974651	0.974651	9821	0.164091	chr11	111410932	111412199	23594317	FALSE	FALSE
chr11_111472723_111473939	0.0235351	0.0229464	-0.000588764	5431	-0.118598	2731.5	506	372	0.00264811	2.57706	-2.57706	2730.5	0.00660298	chr11	111472723	111473939	23532577	FALSE	FALSE
chr11_111636594_111637214	0.0208547	0.0206021	-0.00025255	6699	-0.0454014	6012	506	372	0.249889	0.602253	-0.602253	6012	0.334378	chr11	111636594	111637214	23369302	FALSE	FALSE
chr11_111741953_111742292	0.0345226	0.0343718	-0.000150848	7118	-0.041502	6221	506	372	0.292899	0.533282	-0.533282	6221	0.380432	chr11	111741953	111742292	23264224	FALSE	FALSE
chr11_111749570_111750078	0.0284524	0.0279798	-0.000472542	5832.5	-0.0825152	4069.5	506	372	0.0365001	1.43771	-1.43771	4069.5	0.0663535	chr11	111749570	111750078	23256438	FALSE	FALSE
chr11_111807607_111808203	0.0554392	0.0544337	-0.00100549	4474	-0.116261	2803.5	506	372	0.00321252	2.49315	-2.49315	2802.5	0.00784286	chr11	111807607	111808203	23198313	FALSE	FALSE
chr11_111847927_111848401	0.0517135	0.0359147	-0.0157988	1892	-0.281695	522	506	372	9.34924e-13	12.0292	-12.0292	522	1.18037e-11	chr11	111847927	111848401	23158115	FALSE	FALSE
chr11_111957352_111957681	0.0667786	0.0654322	-0.00134638	4023	-0.0824089	4073.5	506	372	0.036742	1.43484	-1.43484	4073.5	0.0667396	chr11	111957352	111957681	23048835	FALSE	FALSE
chr11_112097022_112097547	0.0566643	0.0558959	-0.000768416	4952	-0.0795083	4212	506	372	0.0438944	1.35759	-1.35759	4212	0.0775985	chr11	112097022	112097547	22908969	FALSE	FALSE
chr11_112832524_112834490	0.157533	0.0959951	-0.061538	708	-0.383941	119	506	372	2.21709e-22	21.6542	-21.6542	119	1.28905e-20	chr11	112832524	112834490	22172026	FALSE	TRUE
chr11_113345068_113346328	0.102021	0.115127	0.0131061	11473	0.0601704	9738	506	372	0.12727	0.895275	0.895275	9738	0.191123	chr11	113345068	113346328	21660188	FALSE	TRUE
chr11_113644299_113644657	0.0348894	0.0345597	-0.000329722	6388	-0.0970292	3501	506	372	0.0139252	1.8562	-1.8562	3499	0.0285999	chr11	113644299	113644657	21361859	FALSE	FALSE
chr11_113929633_113932190	0.0969042	0.0873933	-0.00951087	2287	-0.155021	1851.5	506	372	8.52747e-05	4.06918	-4.06918	1851.5	0.000294548	chr11	113929633	113932190	21074326	FALSE	TRUE
chr11_114069863_114070117	0.963277	0.966435	0.0031575	10339	0.106703	10644	506	372	0.00684295	2.16476	2.16476	10644	0.015422	chr11	114069863	114070117	20936399	FALSE	TRUE
chr11_114270799_114271690	0.0412492	0.0412533	4.10527e-06	7688	-0.0148965	7524	506	372	0.70585	0.151288	-0.151288	7524	0.768229	chr11	114270799	114271690	20734826	FALSE	FALSE
chr11_114310001_114310586	0.0330164	0.0324544	-0.000561915	5515	-0.0755132	4404	506	372	0.0556408	1.25461	-1.25461	4404	0.0950046	chr11	114310001	114310586	20695930	FALSE	FALSE
chr11_115373574_115375881	0.0667046	0.0567241	-0.00998056	2245	-0.325056	327.5	506	372	1.73934e-16	15.7596	-15.7596	327.5	3.74012e-15	chr11	115373574	115375881	19630635	FALSE	FALSE
chr11_115529997_115530548	0.12328	0.0763706	-0.0469093	943	-0.170088	1629	506	372	1.62555e-05	4.789	-4.789	1629	6.32432e-05	chr11	115529997	115530548	19475968	FALSE	TRUE
chr11_115630398_115631117	0.116615	0.0922833	-0.0243313	1527	-0.107697	3074	506	372	0.00634165	2.1978	-2.1978	3073	0.0144193	chr11	115630398	115631117	19375399	FALSE	TRUE
chr11_116371182_116371606	0.465113	0.304138	-0.160975	122	-0.219665	1014	506	372	2.58359e-08	7.58778	-7.58778	1014	1.5909e-07	chr11	116371182	116371606	18634910	FALSE	TRUE
chr11_11642121_11643819	0.0651429	0.066874	0.0017311	9852	0.0495877	9517	506	372	0.208853	0.68016	0.68016	9517	0.288207	chr11	11642121	11643819	11642121	FALSE	TRUE
chr11_116450659_116451912	0.227444	0.317298	0.0898539	13118	0.0942135	10383	506	372	0.0169486	1.77087	1.77087	10383	0.0339348	chr11	116450659	116451912	18554604	FALSE	TRUE
chr11_116643309_116643892	0.0191323	0.0188839	-0.00024841	6712	-0.0407263	6259	506	372	0.302014	0.519972	-0.519972	6259	0.38999	chr11	116643309	116643892	18362624	FALSE	FALSE
chr11_116658411_116658895	0.0475065	0.0457285	-0.00177797	3618	-0.135205	2282	506	372	0.000610713	3.21416	-3.21416	2280	0.00177197	chr11	116658411	116658895	18347621	FALSE	FALSE
chr11_116661034_116661410	0.874943	0.885988	0.0110457	11323	0.133357	11115	506	372	0.000724986	3.13967	3.13967	11115	0.00206332	chr11	116661034	116661410	18345106	FALSE	FALSE
chr11_116706481_116706910	0.0697306	0.0844111	0.0146805	11570	0.171639	11719	506	372	1.35971e-05	4.86655	4.86655	11719	5.36868e-05	chr11	116706481	116706910	18299606	FALSE	FALSE
chr11_117014699_117015560	0.0486516	0.0473346	-0.001317	4049	-0.0797951	4198	506	372	0.0431382	1.36514	-1.36514	4198	0.0764712	chr11	117014699	117015560	17990956	FALSE	FALSE
chr11_117049399_117050234	0.0564314	0.0548088	-0.00162258	3727	-0.0714969	4626.5	506	372	0.0699801	1.15503	-1.15503	4626.5	0.115261	chr11	117049399	117050234	17956282	FALSE	FALSE
chr11_117102742_117103452	0.0725151	0.0722518	-0.000263207	6655	-0.0114114	7683	506	372	0.772503	0.1121	-0.1121	7683	0.822082	chr11	117102742	117103452	17903064	FALSE	FALSE
chr11_117186344_117186979	0.041812	0.0400795	-0.00173242	3653	-0.202367	1202	506	372	2.91118e-07	6.53593	-6.53593	1202	1.51684e-06	chr11	117186344	117186979	17819537	FALSE	FALSE
chr11_117198423_117198950	0.0714825	0.0708773	-0.000605218	5377	-0.0747694	4441	506	372	0.0580942	1.23587	-1.23587	4441	0.0985477	chr11	117198423	117198950	17807566	FALSE	FALSE
chr11_117352691_117352961	0.931046	0.930193	-0.000853539	4754	0.00134409	8153	506	372	0.972931	0.0119181	0.0119181	8153	0.980239	chr11	117352691	117352961	17653555	FALSE	TRUE
chr11_117389186_117389471	0.906826	0.913185	0.0063585	10913	0.00216754	8181.5	506	372	0.956294	0.0194084	0.0194084	8181.5	0.967002	chr11	117389186	117389471	17617045	FALSE	TRUE
chr11_117666634_117668141	0.0827362	0.0646921	-0.0180441	1778	-0.172149	1595	506	372	1.28176e-05	4.89219	-4.89219	1595	5.08166e-05	chr11	117666634	117668141	17338375	FALSE	TRUE
chr11_117747102_117747717	0.0378584	0.0345521	-0.00330634	3026	-0.243402	798	506	372	6.86468e-10	9.16338	-9.16338	798	5.54537e-09	chr11	117747102	117747717	17258799	FALSE	TRUE
chr11_118016237_118016984	0.0478703	0.0542421	0.00637178	10914	0.221248	12382	506	372	2.0507e-08	7.6881	7.6881	12382	1.28318e-07	chr11	118016237	118016984	16989532	FALSE	FALSE
chr11_118023352_118024194	0.0266526	0.0242899	-0.00236277	3331	-0.21958	1016	506	372	2.61571e-08	7.58241	-7.58241	1016	1.60849e-07	chr11	118023352	118024194	16982322	FALSE	FALSE
chr11_118230164_118230368	0.0205611	0.020037	-0.000524109	5649	-0.043882	6084	506	372	0.266092	0.574969	-0.574969	6084	0.352232	chr11	118230164	118230368	16776148	FALSE	FALSE
chr11_118305422_118307705	0.0339017	0.0333859	-0.000515807	5681	-0.0917591	3700.5	506	372	0.0200393	1.69812	-1.69812	3700.5	0.0392927	chr11	118305422	118307705	16698811	FALSE	FALSE
chr11_118401235_118402069	0.0331637	0.0328069	-0.000356816	6274	0.0116505	8512	506	372	0.76787	0.114712	0.114712	8512	0.818824	chr11	118401235	118402069	16604447	FALSE	FALSE
chr11_118478235_118481896	0.17916	0.190792	0.0116325	11369	0.0866059	10239	506	372	0.0281639	1.55031	1.55031	10239	0.0530648	chr11	118478235	118481896	16524620	FALSE	TRUE
chr11_118661305_118663026	0.0457432	0.0502477	0.00450448	10635	0.192257	12018	506	372	1.09993e-06	5.95863	5.95863	12018	5.22652e-06	chr11	118661305	118663026	16343490	FALSE	FALSE
chr11_118781060_118781732	0.251695	0.247574	-0.00412035	2861	-0.0764376	4360.5	506	372	0.0527126	1.27809	-1.27809	4360.5	0.0907136	chr11	118781060	118781732	16224784	FALSE	FALSE
chr11_118842379_118842933	0.686579	0.705345	0.0187662	11791	0.0913022	10330	506	372	0.0206661	1.68474	1.68474	10330	0.0403522	chr11	118842379	118842933	16163583	FALSE	TRUE
chr11_118868641_118869204	0.0226954	0.0234122	0.000716787	9175	0.141825	11269	506	372	0.000324903	3.48825	3.48825	11269	0.000999876	chr11	118868641	118869204	16137312	FALSE	FALSE
chr11_118888878_118890115	0.0733905	0.073155	-0.000235438	6774	0.0056951	8312	506	372	0.885331	0.0528943	0.0528943	8312	0.912684	chr11	118888878	118890115	16116401	FALSE	FALSE
chr11_118900986_118901749	0.0495989	0.0503829	0.000783972	9262	0.148848	11386	506	372	0.000161553	3.79168	3.79168	11386	0.000530304	chr11	118900986	118901749	16104767	FALSE	FALSE
chr11_118927374_118928412	0.0368224	0.0366222	-0.000200279	6902	-0.0182753	7386	506	372	0.64331	0.191579	-0.191579	7386	0.713695	chr11	118927374	118928412	16078104	FALSE	FALSE
chr11_118938193_118938815	0.0291627	0.0286383	-0.000524376	5648	-0.0679056	4812.5	506	372	0.0852484	1.06931	-1.06931	4812.5	0.136395	chr11	118938193	118938815	16067701	FALSE	FALSE
chr11_118955574_118955832	0.0262119	0.0263504	0.000138499	8145	-0.0233435	7133.5	506	372	0.554162	0.256363	-0.256363	7133.5	0.635667	chr11	118955574	118955832	16050684	FALSE	FALSE
chr11_118965017_118966464	0.0238765	0.0232668	-0.000609679	5364	-0.0958498	3549	506	372	0.0151283	1.82021	-1.82021	3547	0.0307122	chr11	118965017	118966464	16040052	FALSE	FALSE
chr11_118977878_118978785	0.029101	0.028877	-0.00022408	6806	-0.074185	4485.5	506	372	0.0600843	1.22124	-1.22124	4485	0.101264	chr11	118977878	118978785	16027731	FALSE	FALSE
chr11_118991886_118992751	0.0339029	0.033423	-0.000479959	5794	-0.0674806	4834	506	372	0.0872213	1.05938	-1.05938	4834	0.139108	chr11	118991886	118992751	16013765	FALSE	FALSE
chr11_119019643_119020887	0.11305	0.112823	-0.000227526	6797	0.00780951	8388	506	372	0.843196	0.0740714	0.0740714	8388	0.879826	chr11	119019643	119020887	15985629	FALSE	TRUE
chr11_119076641_119077277	0.0163465	0.0162087	-0.000137787	7158	-0.027413	6923	506	372	0.487256	0.312243	-0.312243	6923	0.573987	chr11	119076641	119077277	15929239	FALSE	FALSE
chr11_119186947_119187894	0.0506822	0.0478958	-0.00278639	3179	-0.130265	2403	506	372	0.000961409	3.01709	-3.01709	2402	0.00266344	chr11	119186947	119187894	15818622	FALSE	FALSE
chr11_119191535_119192182	0.0627801	0.0751699	0.0123897	11418	0.140529	11248.5	506	372	0.000368413	3.43367	3.43367	11248.5	0.0011218	chr11	119191535	119192182	15814334	FALSE	FALSE
chr11_119205023_119205568	0.0534569	0.0529604	-0.00049654	5747	-0.0534022	5606	506	372	0.175925	0.754672	-0.754672	5606	0.249191	chr11	119205023	119205568	15800948	FALSE	FALSE
chr11_119227096_119227758	0.0730542	0.369269	0.296215	13524	0.299949	13114	506	372	2.90613e-14	13.5367	13.5367	13114	4.57251e-13	chr11	119227096	119227758	15778758	FALSE	FALSE
chr11_119234480_119235214	0.112435	0.129368	0.0169327	11700	0.146776	11347	506	372	0.000199154	3.70081	3.70081	11347	0.000640383	chr11	119234480	119235214	15771302	FALSE	TRUE
chr11_119293320_119293943	0.254948	0.074911	-0.180037	90	-0.34025	254	506	372	6.47006e-18	17.1891	-17.1891	254	1.75651e-16	chr11	119293320	119293943	15712573	FALSE	TRUE
chr11_119455153_119456102	0.0326169	0.0366364	0.00401957	10546	0.222842	12421	506	372	1.62264e-08	7.78978	7.78978	12421	1.03884e-07	chr11	119455153	119456102	15550414	FALSE	FALSE
chr11_119598382_119600157	0.0253316	0.0248419	-0.000489641	5765	-0.108111	3059	506	372	0.00614251	2.21165	-2.21165	3058	0.0140112	chr11	119598382	119600157	15406359	FALSE	FALSE
chr11_120008046_120008710	0.649183	0.76783	0.118647	13294	0.232553	12550.5	506	372	3.76473e-09	8.42427	8.42427	12550.5	2.673e-08	chr11	120008046	120008710	14997806	FALSE	TRUE
chr11_120039601_120040210	0.0463944	0.0504708	0.00407637	10562	0.191402	12003	506	372	1.22728e-06	5.91106	5.91106	12003	5.7709e-06	chr11	120039601	120040210	14966306	FALSE	FALSE
chr11_120081487_120082345	0.0349283	0.0359221	0.000993829	9421	0.115283	10782	506	372	0.0034795	2.45848	2.45848	10782	0.00842931	chr11	120081487	120082345	14924171	FALSE	FALSE
chr11_120110497_120110719	0.178158	0.249598	0.0714395	12957	0.248077	12707	506	372	3.22263e-10	9.49179	9.49179	12707	2.7133e-09	chr11	120110497	120110719	14895797	FALSE	TRUE
chr11_120195805_120196372	0.0456982	0.0393673	-0.00633089	2565	-0.221663	997	506	372	1.92989e-08	7.71447	-7.71447	997	1.21432e-07	chr11	120195805	120196372	14810144	FALSE	FALSE
chr11_120206460_120207649	0.0275451	0.0269617	-0.000583448	5451	-0.0800395	4187	506	372	0.0425028	1.37158	-1.37158	4187	0.075493	chr11	120206460	120207649	14798867	FALSE	FALSE
chr11_12029737_12030841	0.0866602	0.1186	0.0319396	12285	0.077872	10066	506	372	0.0484244	1.31494	1.31494	10066	0.0843738	chr11	12029737	12030841	12029737	FALSE	TRUE
chr11_120434822_120435940	0.299308	0.122321	-0.176987	98	-0.393313	107	506	372	2.08643e-23	22.6806	-22.6806	107	1.41324e-21	chr11	120434822	120435940	14570576	FALSE	TRUE
chr11_120998386_120998886	0.851822	0.871189	0.0193675	11822	0.114492	10770	506	372	0.00371031	2.43059	2.43059	10770	0.00892464	chr11	120998386	120998886	14007630	FALSE	TRUE
chr11_121163244_121163952	0.0336	0.0330243	-0.00057565	5473	-0.0650368	4961	506	372	0.099291	1.00309	-1.00309	4961	0.155233	chr11	121163244	121163952	13842564	FALSE	FALSE
chr11_121322538_121323302	0.0245393	0.0277644	0.00322514	10362	0.240724	12636	506	372	1.05202e-09	8.97797	8.97797	12636	8.22851e-09	chr11	121322538	121323302	13683214	FALSE	FALSE
chr11_122526278_122527479	0.0294886	0.0292072	-0.000281399	6581	-0.0515747	5696	506	372	0.191183	0.71855	-0.71855	5696	0.267309	chr11	122526278	122527479	12479037	FALSE	FALSE
chr11_122753386_122753951	0.0487233	0.0524701	0.00374679	10494	0.133187	11110	506	372	0.000736435	3.13287	3.13287	11110	0.00209194	chr11	122753386	122753951	12252565	FALSE	FALSE
chr11_122847494_122848608	0.200507	0.13353	-0.0669769	628	-0.204142	1183	506	372	2.29034e-07	6.6401	-6.6401	1183	1.21058e-06	chr11	122847494	122848608	12157908	FALSE	TRUE
chr11_122852411_122852699	0.226403	0.214462	-0.0119414	2102	-0.00123252	8055.5	506	372	0.975186	0.0109127	-0.0109127	8055.5	0.981927	chr11	122852411	122852699	12153817	FALSE	TRUE
chr11_122854930_122855582	0.0494133	0.0466424	-0.00277089	3184	-0.0599792	5223	506	372	0.128483	0.891153	-0.891153	5223	0.192626	chr11	122854930	122855582	12150934	FALSE	TRUE
chr11_122932173_122933803	0.067774	0.0658684	-0.00190559	3544	-0.13274	2345	506	372	0.000767292	3.11504	-3.11504	2343	0.0021705	chr11	122932173	122933803	12072713	FALSE	FALSE
chr11_123066517_123066986	0.556117	0.587306	0.0311885	12257	0.0611161	9760	506	372	0.1214	0.915783	0.915783	9760	0.183713	chr11	123066517	123066986	11939530	FALSE	TRUE
chr11_123301049_123302149	0.114481	0.136381	0.0218993	11920	0.0944579	10390	506	372	0.0166651	1.77819	1.77819	10390	0.0334413	chr11	123301049	123302149	11704367	FALSE	TRUE
chr11_123524733_123525685	0.0737581	0.0884481	0.01469	11572	0.105381	10613	506	372	0.00756564	2.12115	2.12115	10612.5	0.016758	chr11	123524733	123525685	11480831	FALSE	FALSE
chr11_123611898_123612545	0.0394615	0.0379228	-0.00153878	3804	-0.105933	3149	506	372	0.00725586	2.13931	-2.13931	3148	0.0161856	chr11	123611898	123612545	11393971	FALSE	FALSE
chr11_12398965_12399863	0.0588019	0.0530809	-0.00572104	2626	-0.0174997	7417	506	372	0.657465	0.182127	-0.182127	7417	0.726246	chr11	12398965	12399863	12398965	FALSE	FALSE
chr11_124492664_124493153	0.0241296	0.0237651	-0.000364549	6239	-0.0858728	3919	506	372	0.0295243	1.52982	-1.52982	3919	0.0552516	chr11	124492664	124493153	10513363	FALSE	FALSE
chr11_124543384_124544046	0.0295914	0.0290468	-0.000544606	5583	-0.0222863	7190	506	372	0.572251	0.242413	-0.242413	7190	0.651562	chr11	124543384	124544046	10462470	FALSE	FALSE
chr11_124615389_124617006	0.0973191	0.127943	0.0306237	12242	0.333801	13278	506	372	2.66349e-17	16.5745	16.5745	13278	6.56042e-16	chr11	124615389	124617006	10389510	FALSE	TRUE
chr11_124632063_124633239	0.0356828	0.0401221	0.00443922	10623	0.29427	13082	506	372	8.75206e-14	13.0579	13.0579	13082	1.29006e-12	chr11	124632063	124633239	10373277	FALSE	FALSE
chr11_124669377_124670519	0.0233319	0.022723	-0.000608871	5367	-0.099133	3416.5	506	372	0.0119876	1.92127	-1.92127	3414.5	0.0250649	chr11	124669377	124670519	10335997	FALSE	FALSE
chr11_124709222_124709957	0.0844248	0.0742401	-0.0101847	2228	-0.143929	2076.5	506	372	0.000264379	3.57777	-3.57777	2076.5	0.000827337	chr11	124709222	124709957	10296559	FALSE	FALSE
chr11_124735069_124736465	0.0943481	0.0636389	-0.0307092	1304	-0.217115	1042	506	372	3.73578e-08	7.42762	-7.42762	1042	2.24329e-07	chr11	124735069	124736465	10270051	FALSE	TRUE
chr11_124745909_124746773	0.0351288	0.035635	0.0005062	8912	0.0111989	8494	506	372	0.776628	0.109787	0.109787	8494	0.825369	chr11	124745909	124746773	10259743	FALSE	FALSE
chr11_124823793_124824329	0.0264208	0.0255934	-0.000827368	4819	-0.101577	3319	506	372	0.0100399	1.99827	-1.99827	3317	0.0214901	chr11	124823793	124824329	10182187	FALSE	FALSE
chr11_124932730_124933657	0.0412411	0.0418288	0.000587694	9026	0.0171172	8689	506	372	0.664491	0.177511	0.177511	8689	0.732276	chr11	124932730	124933657	10072859	FALSE	FALSE
chr11_125034896_125036426	0.270271	0.113422	-0.156849	131	-0.520751	6	506	372	8.8995e-40	39.0506	-39.0506	6	1.50702e-36	chr11	125034896	125036426	9970090	TRUE	TRUE
chr11_125365137_125366319	0.0520443	0.0392664	-0.0127779	2042	-0.287836	482	506	372	2.97723e-13	12.5262	-12.5262	482	4.10301e-12	chr11	125365137	125366319	9640197	TRUE	TRUE
chr11_125439122_125439730	0.0639616	0.0636647	-0.000296913	6518	-0.0461664	5978	506	372	0.241997	0.61619	-0.61619	5978	0.32549	chr11	125439122	125439730	9566786	TRUE	FALSE
chr11_125462323_125462884	0.0318465	0.0312345	-0.000611965	5359	-0.0845977	3985	506	372	0.0320251	1.49451	-1.49451	3985	0.0591553	chr11	125462323	125462884	9543632	TRUE	FALSE
chr11_125757055_125758107	0.0427392	0.0622854	0.0195462	11832	0.274119	12934	506	372	3.71169e-12	11.4304	11.4304	12934	4.26121e-11	chr11	125757055	125758107	9248409	TRUE	FALSE
chr11_126081369_126082028	0.0285043	0.0280836	-0.000420766	6027	-0.100557	3363	506	372	0.0108157	1.96595	-1.96595	3361	0.0229153	chr11	126081369	126082028	8924488	TRUE	FALSE
chr11_126138359_126139166	0.0321343	0.031491	-0.000643294	5264	-0.0991011	3418	506	372	0.012015	1.92027	-1.92027	3416	0.0251146	chr11	126138359	126139166	8867350	TRUE	FALSE
chr11_126152722_126153400	0.0350167	0.0352027	0.000185996	8286	0.0446152	9416	506	372	0.258186	0.588068	0.588068	9416	0.343512	chr11	126152722	126153400	8853116	TRUE	FALSE
chr11_126173539_126174042	0.0534549	0.0497942	-0.00366075	2941	-0.0315409	6725	506	372	0.424113	0.372519	-0.372519	6725	0.5134	chr11	126173539	126174042	8832474	TRUE	FALSE
chr11_126225355_126226073	0.0393859	0.0387827	-0.000603244	5388	0.0208891	8791	506	372	0.59658	0.224331	0.224331	8791	0.672984	chr11	126225355	126226073	8780443	TRUE	FALSE
chr11_126873091_126873809	0.124782	0.108995	-0.0157872	1893	-0.0702006	4692	506	372	0.0752096	1.12373	-1.12373	4692	0.122577	chr11	126873091	126873809	8132707	TRUE	TRUE
chr11_12695414_12696981	0.0387523	0.0361853	-0.00256697	3268	-0.146628	2017	506	372	0.000202148	3.69433	-3.69433	2017	0.000648932	chr11	12695414	12696981	12695414	FALSE	FALSE
chr11_128391712_128392611	0.0343598	0.0327124	-0.00164739	3712	-0.185101	1414	506	372	2.71233e-06	5.56666	-5.56666	1414	1.20948e-05	chr11	128391712	128392611	6613905	TRUE	TRUE
chr11_128562671_128565011	0.0905026	0.101225	0.0107229	11299	0.000966892	8137	506	372	0.980556	0.00852779	0.00852779	8137	0.985868	chr11	128562671	128565011	6441505	TRUE	TRUE
chr11_128694084_128694688	0.46257	0.503484	0.0409142	12525	0.0439351	9399	506	372	0.265513	0.575914	0.575914	9399	0.35157	chr11	128694084	128694688	6311828	TRUE	TRUE
chr11_128760441_128761233	0.0433483	0.0382892	-0.00505909	2717	-0.239832	833	506	372	1.2117e-09	8.91661	-8.91661	833	9.33723e-09	chr11	128760441	128761233	6245283	TRUE	TRUE
chr11_129234116_129234346	0.0327545	0.0331696	0.000415135	8769	0.0329168	9121	506	372	0.404178	0.393427	0.393427	9121	0.494349	chr11	129234116	129234346	5772170	TRUE	FALSE
chr11_129243998_129244567	0.086999	0.116756	0.0297573	12217	0.026648	8956	506	372	0.499491	0.301472	0.301472	8956	0.585499	chr11	129243998	129244567	5761949	TRUE	TRUE
chr11_129245108_129246395	0.0523316	0.0721613	0.0198297	11846	0.240363	12631	506	372	1.11402e-09	8.95311	8.95311	12631	8.66834e-09	chr11	129245108	129246395	5760121	TRUE	TRUE
chr11_1293162_1294071	0.849993	0.84072	-0.00927299	2302	-0.124867	2542	506	372	0.00155203	2.8091	-2.8091	2542	0.00409692	chr11	1293162	1294071	1293162	TRUE	TRUE
chr11_129765145_129765617	0.0275197	0.026707	-0.000812681	4848	-0.115974	2814	506	372	0.00328887	2.48295	-2.48295	2813	0.00800905	chr11	129765145	129765617	5240899	TRUE	FALSE
chr11_1298009_1298476	0.920347	0.911403	-0.00894433	2330	-0.124665	2550	506	372	0.00157955	2.80147	-2.80147	2550	0.00415901	chr11	1298009	1298476	1298009	TRUE	FALSE
chr11_129871690_129873423	0.0376509	0.0376151	-3.57479e-05	7534	-0.000903141	8063	506	372	0.981844	0.0079573	-0.0079573	8063	0.987017	chr11	129871690	129873423	5133093	TRUE	FALSE
chr11_129938936_129940798	0.0423568	0.0427517	0.000394847	8729	0.0145034	8601	506	372	0.713268	0.146747	0.146747	8601	0.77363	chr11	129938936	129940798	5065718	TRUE	FALSE
chr11_130297401_130298517	0.0859515	0.0727784	-0.0131731	2023	-0.134345	2308	506	372	0.000661647	3.17937	-3.17937	2306	0.00190224	chr11	130297401	130298517	4707999	TRUE	TRUE
chr11_13030330_13032584	0.0898203	0.231844	0.142024	13369	0.415976	13484	506	372	5.4563e-26	25.2631	25.2631	13484	5.57357e-24	chr11	13030330	13032584	13030330	FALSE	TRUE
chr11_130318234_130320198	0.0836205	0.11257	0.0289496	12183	0.270677	12912	506	372	6.86248e-12	11.1635	11.1635	12912	7.51544e-11	chr11	130318234	130320198	4686318	TRUE	TRUE
chr11_130416800_130417098	0.853241	0.868036	0.0147948	11581	0.0394088	9285	506	372	0.317926	0.497674	0.497674	9285	0.40716	chr11	130416800	130417098	4589418	TRUE	TRUE
chr11_130786111_130786634	0.0491422	0.0458706	-0.00327164	3040	-0.0798801	4196	506	372	0.0429163	1.36738	-1.36738	4196	0.0761277	chr11	130786111	130786634	4219882	TRUE	TRUE
chr11_1315467_1317115	0.776227	0.765707	-0.0105206	2201	-0.116856	2784.5	506	372	0.0030593	2.51438	-2.51438	2783.5	0.00751211	chr11	1315467	1317115	1315467	TRUE	FALSE
chr11_131780328_131781532	0.265439	0.0524342	-0.213005	53	-0.483106	18	506	372	1.79191e-34	33.7467	-33.7467	18	8.56743e-32	chr11	131780328	131781532	3224984	TRUE	TRUE
chr11_13298796_13300735	0.0425822	0.0479408	0.00535862	10784	0.123125	10923	506	372	0.00180478	2.74358	2.74358	10923	0.00467931	chr11	13298796	13300735	13298796	FALSE	FALSE
chr11_1330390_1331498	0.0278732	0.0278291	-4.41298e-05	7501.5	0.0551235	9626	506	372	0.162403	0.789407	0.789407	9626	0.232935	chr11	1330390	1331498	1330390	TRUE	FALSE
chr11_133787971_133791268	0.706354	0.728627	0.0222724	11939	0.0537528	9602	506	372	0.173105	0.761691	0.761691	9602	0.245864	chr11	133787971	133791268	1215248	TRUE	TRUE
chr11_133825337_133827457	0.0744504	0.0469568	-0.0274936	1406	-0.244273	791	506	372	5.96855e-10	9.22413	-9.22413	791	4.85621e-09	chr11	133825337	133827457	1179059	TRUE	TRUE
chr11_133938850_133939681	0.176712	0.0892657	-0.0874466	439	-0.474712	22	506	372	2.41205e-33	32.6176	-32.6176	22	9.07667e-31	chr11	133938850	133939681	1066835	TRUE	FALSE
chr11_134093696_134095491	0.0622769	0.060984	-0.00129291	4088	-0.100674	3359.5	506	372	0.0107242	1.96964	-1.96964	3357.5	0.0227427	chr11	134093696	134095491	911025	TRUE	FALSE
chr11_134122762_134122981	0.0308398	0.0298496	-0.000990199	4497	-0.132794	2341	506	372	0.000763557	3.11716	-3.11716	2339	0.00216264	chr11	134122762	134122981	883535	TRUE	FALSE
chr11_134123209_134123996	0.0346255	0.0342139	-0.00041157	6052	-0.0660462	4910	506	372	0.0941533	1.02616	-1.02616	4910	0.148434	chr11	134123209	134123996	882520	TRUE	FALSE
chr11_134145559_134147180	0.0828882	0.113611	0.0307226	12245	0.0837796	10187	506	372	0.0337237	1.47206	1.47206	10187	0.0619045	chr11	134145559	134147180	859336	TRUE	TRUE
chr11_134201784_134202407	0.0535905	0.181386	0.127796	13322	0.297123	13098	506	372	5.04312e-14	13.2973	13.2973	13098	7.6677e-13	chr11	134201784	134202407	804109	TRUE	FALSE
chr11_134281380_134282919	0.0906137	0.0388877	-0.051726	863	-0.450221	33	506	372	3.67375e-30	29.4349	-29.4349	33	7.89973e-28	chr11	134281380	134282919	723597	TRUE	TRUE
chr11_13484273_13485290	0.0359982	0.0358877	-0.000110447	7258	-0.0482171	5853	506	372	0.221713	0.654209	-0.654209	5853	0.303052	chr11	13484273	13485290	13484273	FALSE	FALSE
chr11_13689588_13690724	0.0292275	0.0288041	-0.000423424	6015	-0.00640699	7874.5	506	372	0.871103	0.0599307	-0.0599307	7874	0.901928	chr11	13689588	13690724	13689588	FALSE	TRUE
chr11_13984066_13986349	0.22965	0.30054	0.0708902	12951	0.250021	12722	506	372	2.34351e-10	9.63013	9.63013	12722	2.00806e-09	chr11	13984066	13986349	13984066	FALSE	TRUE
chr11_1410119_1412346	0.0818701	0.0595084	-0.0223618	1604	-0.173764	1565	506	372	1.06209e-05	4.97384	-4.97384	1565	4.27709e-05	chr11	1410119	1412346	1410119	TRUE	TRUE
chr11_14379808_14380737	0.0289937	0.028787	-0.000206675	6888	-0.0128724	7606	506	372	0.744324	0.128238	-0.128238	7606	0.800203	chr11	14379808	14380737	14379808	FALSE	FALSE
chr11_14541600_14542225	0.0382067	0.0378008	-0.000405859	6083	-0.0465808	5954	506	372	0.237797	0.623794	-0.623794	5954	0.320796	chr11	14541600	14542225	14541600	FALSE	FALSE
chr11_1466304_1467210	0.760402	0.827057	0.0666555	12909	0.222268	12407	506	372	1.76566e-08	7.75309	7.75309	12407	1.12087e-07	chr11	1466304	1467210	1466304	TRUE	FALSE
chr11_14665053_14666674	0.050021	0.0511204	0.00109944	9498	0.0250648	8917	506	372	0.525322	0.279574	0.279574	8917	0.609188	chr11	14665053	14666674	14665053	FALSE	FALSE
chr11_1481778_1482644	0.721844	0.810285	0.0884405	13108	0.279995	12982	506	372	1.27796e-12	11.8935	11.8935	12982	1.57817e-11	chr11	1481778	1482644	1481778	TRUE	TRUE
chr11_14912900_14913771	0.0365131	0.0371644	0.000651248	9099	0.0371457	9235	506	372	0.346517	0.460275	0.460275	9235	0.436717	chr11	14912900	14913771	14912900	FALSE	TRUE
chr11_14926471_14927770	0.546149	0.573894	0.0277449	12142	0.0789239	10082	506	372	0.0454694	1.34228	1.34228	10082	0.0799136	chr11	14926471	14927770	14926471	FALSE	TRUE
chr11_14993452_14993661	0.249314	0.254205	0.00489101	10705	-0.0274449	6921	506	372	0.486749	0.312695	-0.312695	6921	0.573491	chr11	14993452	14993661	14993452	FALSE	TRUE
chr11_14995128_14995908	0.164822	0.098184	-0.0666382	633	-0.24456	789.5	506	372	5.69928e-10	9.24418	-9.24418	789.5	4.66233e-09	chr11	14995128	14995908	14995128	FALSE	TRUE
chr11_15094957_15095872	0.119233	0.0743071	-0.0449257	983	-0.265502	638	506	372	1.70438e-11	10.7684	-10.7684	638	1.76119e-10	chr11	15094957	15095872	15094957	FALSE	TRUE
chr11_15136058_15136545	0.233709	0.177076	-0.056633	780	-0.07291	4551	506	372	0.0646229	1.18961	-1.18961	4551	0.107708	chr11	15136058	15136545	15136058	FALSE	TRUE
chr11_1577705_1579091	0.846022	0.860679	0.0146574	11569	0.104924	10602.5	506	372	0.00783071	2.1062	2.1062	10602.5	0.0172633	chr11	1577705	1579091	1577705	TRUE	TRUE
chr11_1593550_1594378	0.0648545	0.0619573	-0.00289725	3143	-0.147308	2002	506	372	0.000188797	3.724	-3.724	2002	0.000609832	chr11	1593550	1594378	1593550	TRUE	FALSE
chr11_15962882_15963223	0.794082	0.79498	0.000898421	9353	0.0117727	8517.5	506	372	0.765506	0.116052	0.116052	8517.5	0.817332	chr11	15962882	15963223	15962882	FALSE	TRUE
chr11_16626053_16629180	0.0721653	0.061902	-0.0102633	2221	-0.334768	278	506	372	2.158e-17	16.6659	-16.6659	278	5.3641e-16	chr11	16626053	16629180	16626053	FALSE	FALSE
chr11_1673834_1674224	0.180162	0.159009	-0.0211524	1647	-0.287114	487	506	372	3.41048e-13	12.4672	-12.4672	487	4.6434e-12	chr11	1673834	1674224	1673834	TRUE	FALSE
chr11_16759945_16760386	0.0478136	0.0469766	-0.000836946	4797	-0.101545	3320.5	506	372	0.0100634	1.99726	-1.99726	3318.5	0.0215301	chr11	16759945	16760386	16759945	FALSE	FALSE
chr11_17034843_17036404	0.0341976	0.0369266	0.00272901	10214	0.224648	12451	506	372	1.24208e-08	7.90585	7.90585	12451	8.11698e-08	chr11	17034843	17036404	17034843	FALSE	FALSE
chr11_17098839_17099506	0.0381576	0.0374787	-0.000678908	5168	-0.0630605	5065	506	372	0.109996	0.958621	-0.958621	5065	0.169217	chr11	17098839	17099506	17098839	FALSE	FALSE
chr11_17229114_17229833	0.0223145	0.02251	0.000195529	8310	0.0117143	8515	506	372	0.766636	0.115411	0.115411	8515	0.818023	chr11	17229114	17229833	17229114	FALSE	FALSE
chr11_17297779_17298694	0.0373754	0.0364058	-0.000969611	4539	-0.0956692	3553.5	506	372	0.0153204	1.81473	-1.81473	3551	0.0310743	chr11	17297779	17298694	17297779	FALSE	FALSE
chr11_17373019_17373665	0.048527	0.169948	0.121421	13302	0.321476	13225	506	372	3.69833e-16	15.432	15.432	13225	7.52272e-15	chr11	17373019	17373665	17373019	FALSE	FALSE
chr11_17410436_17411287	0.0343272	0.0378403	0.00351306	10441	0.227613	12490	506	372	7.97509e-09	8.09826	8.09826	12490	5.3804e-08	chr11	17410436	17411287	17410436	FALSE	FALSE
chr11_17497463_17498626	0.143882	0.119392	-0.0244902	1520	-0.152248	1890	506	372	0.000113954	3.94327	-3.94327	1890	0.000386126	chr11	17497463	17498626	17497463	FALSE	TRUE
chr11_17565766_17566052	0.088092	0.137374	0.0492822	12693	0.30149	13126	506	372	2.14733e-14	13.6681	13.6681	13126	3.45076e-13	chr11	17565766	17566052	17565766	FALSE	FALSE
chr11_1768979_1770712	0.375297	0.278801	-0.0964958	364	-0.235018	881.5	506	372	2.57395e-09	8.5894	-8.5894	881.5	1.88381e-08	chr11	1768979	1770712	1768979	TRUE	TRUE
chr11_17740789_17743779	0.232812	0.210404	-0.0224088	1600	-0.119969	2683	506	372	0.00236089	2.62692	-2.62692	2682	0.00596141	chr11	17740789	17743779	17740789	FALSE	TRUE
chr11_17756056_17758286	0.157879	0.0876805	-0.0701986	589	-0.299333	431	506	372	3.27868e-14	13.4843	-13.4843	431	5.12889e-13	chr11	17756056	17758286	17756056	FALSE	FALSE
chr11_1784805_1785553	0.0243241	0.0235994	-0.000724668	5059	-0.111926	2938	506	372	0.00455743	2.34128	-2.34128	2937	0.010741	chr11	1784805	1785553	1784805	TRUE	FALSE
chr11_18034129_18035268	0.0300435	0.0293502	-0.000693301	5126	-0.124554	2552	506	372	0.00159494	2.79725	-2.79725	2552	0.00419629	chr11	18034129	18035268	18034129	FALSE	FALSE
chr11_18127296_18127711	0.0379213	0.0378313	-8.99285e-05	7343	-0.0328212	6658	506	372	0.405545	0.39196	-0.39196	6658	0.495484	chr11	18127296	18127711	18127296	FALSE	FALSE
chr11_18230619_18230906	0.682311	0.71434	0.032029	12290	0.0946173	10398	506	372	0.0164824	1.78298	1.78298	10398	0.0331336	chr11	18230619	18230906	18230619	FALSE	TRUE
chr11_18343625_18344238	0.0476786	0.048075	0.000396356	8732	0.0209422	8792.5	506	372	0.595646	0.225012	0.225012	8792.5	0.672043	chr11	18343625	18344238	18343625	FALSE	FALSE
chr11_18415922_18416680	0.0426385	0.0447913	0.00215283	10020	0.231034	12528	506	372	4.75001e-09	8.32331	8.32331	12528	3.30161e-08	chr11	18415922	18416680	18415922	FALSE	FALSE
chr11_18417667_18417925	0.0193966	0.0190692	-0.000327341	6398	-0.0794605	4215	506	372	0.0440215	1.35634	-1.35634	4215	0.0777826	chr11	18417667	18417925	18417667	FALSE	FALSE
chr11_1847156_1847381	0.856567	0.867098	0.0105306	11287	0.131604	11082	506	372	0.000851413	3.06986	3.06986	11082	0.00238604	chr11	1847156	1847381	1847156	TRUE	TRUE
chr11_18477298_18477756	0.742568	0.76254	0.019972	11849	0.105274	10611	506	372	0.00762656	2.11767	2.11767	10611	0.0168763	chr11	18477298	18477756	18477298	FALSE	TRUE
chr11_18548060_18548629	0.0465825	0.0454962	-0.00108636	4356	-0.0257767	7008.5	506	372	0.513623	0.289356	-0.289356	7008.5	0.598696	chr11	18548060	18548629	18548060	FALSE	FALSE
chr11_18610010_18610463	0.0624026	0.0612517	-0.00115083	4259	-0.102884	3273	506	372	0.00911858	2.04007	-2.04007	3272	0.0197268	chr11	18610010	18610463	18610010	FALSE	FALSE
chr11_18655811_18656482	0.0275409	0.0271674	-0.000373516	6202	-0.0845287	3988	506	372	0.0321656	1.49261	-1.49261	3988	0.0593905	chr11	18655811	18656482	18655811	FALSE	FALSE
chr11_18812572_18814079	0.140396	0.104378	-0.036018	1159	-0.270698	601	506	372	6.83665e-12	11.1652	-11.1652	601	7.49322e-11	chr11	18812572	18814079	18812572	FALSE	TRUE
chr11_1892037_1892556	0.440644	0.384184	-0.0564601	785	-0.237962	851.5	506	372	1.62656e-09	8.78873	-8.78873	851.5	1.22826e-08	chr11	1892037	1892556	1892037	TRUE	TRUE
chr11_19138497_19139216	0.0474673	0.0518832	0.00441591	10617	0.192348	12020	506	372	1.08726e-06	5.96367	5.96367	12020	5.16991e-06	chr11	19138497	19139216	19138497	FALSE	FALSE
chr11_19262473_19264397	0.0984581	0.103808	0.00534963	10782	0.0763526	10034	506	372	0.0529764	1.27592	1.27592	10034	0.0910981	chr11	19262473	19264397	19262473	FALSE	TRUE
chr11_19366653_19368234	0.109825	0.0636104	-0.0462146	965	-0.437938	42	506	372	1.2553e-28	27.9013	-27.9013	42	2.1257e-26	chr11	19366653	19368234	19366653	FALSE	TRUE
chr11_1948915_1949188	0.817495	0.826476	0.00898081	11174	0.0429151	9365	506	372	0.276771	0.557879	0.557879	9365	0.363316	chr11	1948915	1949188	1948915	TRUE	TRUE
chr11_19733936_19735320	0.0556733	0.0507175	-0.00495574	2732	-0.237101	859	506	372	1.86124e-09	8.7302	-8.7302	859	1.39382e-08	chr11	19733936	19735320	19733936	FALSE	TRUE
chr11_2017459_2018253	0.702161	0.782887	0.0807263	13039	0.235157	12580	506	372	2.51941e-09	8.5987	8.5987	12580	1.84788e-08	chr11	2017459	2018253	2017459	TRUE	TRUE
chr11_20177608_20178824	0.367889	0.416253	0.048364	12674	0.149135	11390	506	372	0.000156908	3.80436	3.80436	11390	0.00051643	chr11	20177608	20178824	20177608	FALSE	TRUE
chr11_20181200_20182325	0.385097	0.267117	-0.11798	247	-0.2274	954.5	506	372	8.23395e-09	8.08439	-8.08439	954.5	5.52204e-08	chr11	20181200	20182325	20181200	FALSE	TRUE
chr11_20184570_20185497	0.224406	0.141236	-0.0831696	483	-0.254633	719	506	372	1.09055e-10	9.96236	-9.96236	719	9.91521e-10	chr11	20184570	20185497	20184570	FALSE	TRUE
chr11_2019565_2019863	0.554736	0.550215	-0.00452054	2804	-0.0780739	4281.5	506	372	0.0478451	1.32016	-1.32016	4281.5	0.083504	chr11	2019565	2019863	2019565	TRUE	FALSE
chr11_20385161_20385673	0.0371919	0.0628867	0.0256947	12068	0.267776	12892	506	372	1.14514e-11	10.9411	10.9411	12892	1.22055e-10	chr11	20385161	20385673	20385161	FALSE	FALSE
chr11_20408755_20409781	0.0322441	0.0317188	-0.000525363	5642	-0.0836043	4027	506	372	0.0340975	1.46728	-1.46728	4027	0.0624975	chr11	20408755	20409781	20408755	FALSE	FALSE
chr11_20618197_20619920	0.319553	0.228323	-0.0912302	404	-0.102087	3306	506	372	0.00967095	2.01453	-2.01453	3304	0.0207627	chr11	20618197	20619920	20618197	FALSE	TRUE
chr11_20622720_20623399	0.262434	0.197522	-0.0649127	652	-0.180224	1484	506	372	4.92706e-06	5.30741	-5.30741	1484	2.09896e-05	chr11	20622720	20623399	20622720	FALSE	TRUE
chr11_20690579_20691845	0.124286	0.0567051	-0.067581	617	-0.338603	260	506	372	9.30945e-18	17.0311	-17.0311	260	2.4536e-16	chr11	20690579	20691845	20690579	FALSE	TRUE
chr11_206975_209225	0.0309623	0.0302843	-0.000677988	5170	-0.0971673	3497	506	372	0.01379	1.86044	-1.86044	3495	0.0283522	chr11	206975	209225	206975	TRUE	FALSE
chr11_2154033_2154387	0.276751	0.258834	-0.0179166	1787	-0.0340856	6592	506	372	0.387695	0.41151	-0.41151	6592	0.478072	chr11	2154033	2154387	2154033	TRUE	FALSE
chr11_2158951_2162484	0.222708	0.169296	-0.0534116	839	-0.0857453	3925	506	372	0.0297666	1.52627	-1.52627	3925	0.0556282	chr11	2158951	2162484	2158951	TRUE	FALSE
chr11_2176839_2177043	0.780612	0.737147	-0.0434655	1006	-0.0599579	5224	506	372	0.128619	0.890696	-0.890696	5224	0.192807	chr11	2176839	2177043	2176839	TRUE	TRUE
chr11_22214172_22215320	0.0847657	0.058789	-0.0259767	1462	-0.349377	225	506	372	8.34926e-19	18.0784	-18.0784	225	2.6243e-17	chr11	22214172	22215320	22214172	FALSE	TRUE
chr11_22646706_22647441	0.0400404	0.038918	-0.00112243	4305	-0.105646	3167	506	372	0.00741526	2.12987	-2.12987	3166	0.0164842	chr11	22646706	22647441	22646706	FALSE	FALSE
chr11_22850765_22851367	0.0349239	0.0337063	-0.00121765	4172	-0.110003	2997	506	372	0.00530325	2.27546	-2.27546	2996	0.0123125	chr11	22850765	22851367	22850765	FALSE	FALSE
chr11_2290104_2292932	0.271696	0.316937	0.045241	12608	0.140571	11253	506	372	0.000366904	3.43545	3.43545	11253	0.00111846	chr11	2290104	2292932	2290104	TRUE	TRUE
chr11_235918_237290	0.0505202	0.0489746	-0.0015456	3797	-0.0301862	6801.5	506	372	0.44429	0.352334	-0.352334	6801.5	0.532589	chr11	235918	237290	235918	TRUE	FALSE
chr11_2398223_2399598	0.0547484	0.0721502	0.0174018	11723	0.155436	11481	506	372	8.16265e-05	4.08817	4.08817	11481	0.000282739	chr11	2398223	2399598	2398223	TRUE	TRUE
chr11_2421040_2422474	0.0310974	0.0309375	-0.000159862	7075	-0.0208679	7254.5	506	372	0.596954	0.224059	-0.224059	7254.5	0.673238	chr11	2421040	2422474	2421040	TRUE	FALSE
chr11_2435295_2436651	0.719738	0.691584	-0.0281543	1383	-0.0466871	5944	506	372	0.236728	0.625751	-0.625751	5944	0.319672	chr11	2435295	2436651	2435295	TRUE	TRUE
chr11_24518224_24518738	0.106073	0.0660022	-0.0400707	1071	-0.322931	338	506	372	2.72423e-16	15.5648	-15.5648	338	5.66899e-15	chr11	24518224	24518738	24518224	FALSE	FALSE
chr11_2465171_2465648	0.242735	0.283475	0.0407402	12521	0.0575354	9676	506	372	0.144794	0.839249	0.839249	9676	0.212424	chr11	2465171	2465648	2465171	TRUE	FALSE
chr11_2466247_2466818	0.0570106	0.104607	0.0475965	12657	0.27023	12908	506	372	7.42751e-12	11.1292	11.1292	12908	8.09497e-11	chr11	2466247	2466818	2466247	TRUE	TRUE
chr11_26353537_26353812	0.0467346	0.0364761	-0.0102585	2222	-0.160472	1759	506	372	4.75761e-05	4.32261	-4.32261	1759	0.00017114	chr11	26353537	26353812	26353537	FALSE	FALSE
chr11_2720410_2722087	0.485746	0.500868	0.0151212	11593	0.164595	11609	506	372	3.02312e-05	4.51954	4.51954	11609	0.000112791	chr11	2720410	2722087	2720410	TRUE	FALSE
chr11_27384359_27384870	0.04177	0.0412244	-0.000545621	5581	-0.0119958	7641.5	506	372	0.761193	0.118505	-0.118505	7642	0.814332	chr11	27384359	27384870	27384359	FALSE	FALSE
chr11_27493640_27494357	0.0378071	0.0364019	-0.00140516	3970	-0.160993	1749	506	372	4.4954e-05	4.34723	-4.34723	1749	0.000162702	chr11	27493640	27494357	27493640	FALSE	FALSE
chr11_27527863_27528517	0.049954	0.0477285	-0.00222547	3380	-0.161184	1747	506	372	4.40257e-05	4.35629	-4.35629	1747	0.000159555	chr11	27527863	27528517	27527863	FALSE	FALSE
chr11_27721661_27722639	0.0466963	0.045538	-0.00115826	4248	-0.104722	3210	506	372	0.00795046	2.09961	-2.09961	3209	0.0174874	chr11	27721661	27722639	27721661	FALSE	FALSE
chr11_27743472_27744564	0.169339	0.122548	-0.0467911	946	-0.228888	942	506	372	6.58024e-09	8.18176	-8.18176	942	4.48854e-08	chr11	27743472	27744564	27743472	FALSE	TRUE
chr11_279072_281700	0.266519	0.320212	0.0536928	12766	0.241383	12649	506	372	9.47527e-10	9.02341	9.02341	12649	7.49775e-09	chr11	279072	281700	279072	TRUE	TRUE
chr11_2812415_2813396	0.235519	0.309123	0.0736048	12979	0.186716	11945	506	372	2.21862e-06	5.65392	5.65392	11945	1.00453e-05	chr11	2812415	2813396	2812415	TRUE	TRUE
chr11_2871364_2871940	0.82671	0.744477	-0.0822331	492	-0.283947	504	506	372	6.16169e-13	12.2103	-12.2103	504	8.08841e-12	chr11	2871364	2871940	2871364	TRUE	TRUE
chr11_2883689_2884461	0.286846	0.270844	-0.0160013	1877	-0.0355519	6507	506	372	0.367604	0.43462	-0.43462	6507	0.458304	chr11	2883689	2884461	2883689	TRUE	TRUE
chr11_2890388_2891337	0.516711	0.443569	-0.0731423	554	-0.142909	2100	506	372	0.000292267	3.53422	-3.53422	2100	0.000906857	chr11	2890388	2891337	2890388	TRUE	TRUE
chr11_2905023_2907024	0.0352675	0.0463097	0.0110421	11322	0.140507	11247	506	372	0.000369169	3.43277	3.43277	11247	0.00112385	chr11	2905023	2907024	2905023	TRUE	TRUE
chr11_2907308_2907675	0.213844	0.240212	0.0263681	12094	-0.0296336	6828	506	372	0.452673	0.344215	-0.344215	6828	0.540487	chr11	2907308	2907675	2907308	TRUE	FALSE
chr11_2923301_2923817	0.0390627	0.0415696	0.00250693	10150	0.221503	12387	506	372	1.97552e-08	7.70432	7.70432	12387	1.24014e-07	chr11	2923301	2923817	2923301	TRUE	FALSE
chr11_2949788_2951756	0.0423395	0.0473421	0.00500265	10727	0.183199	11898	506	372	3.42928e-06	5.4648	5.4648	11898	1.50296e-05	chr11	2949788	2951756	2949788	TRUE	FALSE
chr11_2965785_2966102	0.927734	0.931983	0.00424886	10596	0.136151	11179	506	372	0.00055897	3.25261	3.25261	11179	0.00163585	chr11	2965785	2966102	2965785	TRUE	FALSE
chr11_299389_299635	0.678566	0.744598	0.0660316	12903	0.253953	12767	506	372	1.2218e-10	9.913	9.913	12767	1.09542e-09	chr11	299389	299635	299389	TRUE	TRUE
chr11_30038522_30038823	0.223953	0.110315	-0.113638	280	-0.191763	1330	506	372	1.17185e-06	5.93113	-5.93113	1330	5.52946e-06	chr11	30038522	30038823	30038522	FALSE	TRUE
chr11_3012799_3014181	0.036108	0.0356701	-0.000437908	5969	-0.0610204	5167.5	506	372	0.121983	0.913699	-0.913699	5167.5	0.184473	chr11	3012799	3014181	3012799	TRUE	FALSE
chr11_30344536_30344946	0.0247038	0.0242808	-0.000422949	6017	-0.0747482	4445	506	372	0.0581656	1.23533	-1.23533	4444	0.0986194	chr11	30344536	30344946	30344536	FALSE	FALSE
chr11_30605558_30605800	0.483321	0.292919	-0.190403	78	-0.271282	593.5	506	372	6.16254e-12	11.2102	-11.2102	593	6.82617e-11	chr11	30605558	30605800	30605558	FALSE	TRUE
chr11_30606004_30608128	0.0546317	0.0434353	-0.0111963	2151	-0.266639	624	506	372	1.39762e-11	10.8546	-10.8546	624	1.47114e-10	chr11	30606004	30608128	30606004	FALSE	TRUE
chr11_3078142_3078984	0.032713	0.0320136	-0.000699352	5115	-0.114603	2853	506	372	0.00367696	2.43451	-2.43451	2852	0.00885071	chr11	3078142	3078984	3078142	TRUE	FALSE
chr11_31391087_31391498	0.0318455	0.0309345	-0.000910986	4652	-0.092556	3671.5	506	372	0.0189859	1.72157	-1.72157	3670.5	0.0374765	chr11	31391087	31391498	31391087	FALSE	FALSE
chr11_31531131_31531501	0.0262705	0.0257596	-0.000510938	5699	-0.125101	2538	506	372	0.00152073	2.81795	-2.81795	2538	0.00402133	chr11	31531131	31531501	31531131	FALSE	FALSE
chr11_315739_316539	0.541882	0.526489	-0.015392	1912	-0.0223395	7185	506	372	0.571336	0.243109	-0.243109	7185	0.650793	chr11	315739	316539	315739	TRUE	TRUE
chr11_31820060_31821416	0.399549	0.435865	0.0363162	12414	0.133729	11125	506	372	0.000700515	3.15458	3.15458	11125	0.00200082	chr11	31820060	31821416	31820060	FALSE	TRUE
chr11_31825743_31826967	0.528228	0.571534	0.0433067	12575	0.140826	11258	506	372	0.00035797	3.44615	3.44615	11258	0.00109443	chr11	31825743	31826967	31825743	FALSE	TRUE
chr11_31831620_31839038	0.180874	0.191731	0.0108567	11308	0.0196141	8766	506	372	0.619183	0.208181	0.208181	8766	0.693	chr11	31831620	31839038	31831620	FALSE	TRUE
chr11_31839363_31839813	0.374459	0.316057	-0.058402	755	-0.112723	2911	506	372	0.00427726	2.36883	-2.36883	2910	0.010146	chr11	31839363	31839813	31839363	FALSE	TRUE
chr11_31841315_31842003	0.49071	0.589797	0.0990879	13190	0.247492	12704	506	372	3.54477e-10	9.45041	9.45041	12704	2.97712e-09	chr11	31841315	31842003	31841315	FALSE	TRUE
chr11_32112394_32113277	0.110712	0.108885	-0.00182741	3586	-0.083599	4028	506	372	0.0341089	1.46713	-1.46713	4028	0.06251	chr11	32112394	32113277	32112394	FALSE	FALSE
chr11_3224524_3225077	0.0718557	0.0565135	-0.0153422	1915	-0.193028	1315	506	372	9.96208e-07	6.00165	-6.00165	1315	4.76036e-06	chr11	3224524	3225077	3224524	TRUE	TRUE
chr11_32354760_32355484	0.305227	0.320169	0.014942	11586	0.00209847	8177	506	372	0.957689	0.0187754	0.0187754	8177	0.967978	chr11	32354760	32355484	32354760	FALSE	TRUE
chr11_32448261_32449744	0.426908	0.288087	-0.138822	169	-0.311573	385	506	372	2.85566e-15	14.5443	-14.5443	385	5.17188e-14	chr11	32448261	32449744	32448261	FALSE	TRUE
chr11_32452144_32452708	0.556656	0.46342	-0.0932357	390	-0.211218	1109	506	372	8.62969e-08	7.064	-7.064	1109	4.89353e-07	chr11	32452144	32452708	32452144	FALSE	TRUE
chr11_32454874_32457311	0.244513	0.192847	-0.0516667	867	-0.192911	1316	506	372	1.01132e-06	5.99511	-5.99511	1316	4.82745e-06	chr11	32454874	32457311	32454874	FALSE	TRUE
chr11_3253768_3254066	0.654295	0.639351	-0.014944	1933	0.00501509	8296	506	372	0.898957	0.046261	0.046261	8296	0.923779	chr11	3253768	3254066	3253768	TRUE	TRUE
chr11_32605183_32605729	0.0268686	0.0283587	0.00149011	9733	0.119363	10855	506	372	0.00248409	2.60483	2.60483	10855	0.00623762	chr11	32605183	32605729	32605183	FALSE	FALSE
chr11_32851160_32851951	0.0250762	0.0254818	0.000405662	8749	0.124065	10941	506	372	0.00166404	2.77884	2.77884	10941	0.00435693	chr11	32851160	32851951	32851160	FALSE	FALSE
chr11_32913989_32915514	0.0565994	0.0548899	-0.00170952	3668	-0.149093	1959	506	372	0.000157588	3.80248	-3.80248	1959	0.000518417	chr11	32913989	32915514	32913989	FALSE	FALSE
chr11_33037206_33037917	0.0325956	0.0300031	-0.00259252	3252	-0.198925	1243	506	372	4.61048e-07	6.33625	-6.33625	1243	2.32705e-06	chr11	33037206	33037917	33037206	FALSE	FALSE
chr11_33060699_33061846	0.0329259	0.0324519	-0.000474021	5823	-0.0681818	4801	506	372	0.0839854	1.0758	-1.0758	4801	0.134581	chr11	33060699	33061846	33060699	FALSE	FALSE
chr11_33182987_33183264	0.0338242	0.0329875	-0.000836659	4799	-0.081187	4135.5	506	372	0.0396239	1.40204	-1.40204	4135	0.0711255	chr11	33182987	33183264	33182987	FALSE	FALSE
chr11_33278657_33280175	0.0355937	0.0355986	4.95464e-06	7694	-0.081373	4126	506	372	0.0391733	1.40701	-1.40701	4126	0.0704568	chr11	33278657	33280175	33278657	FALSE	FALSE
chr11_33397607_33398494	0.0422912	0.0359756	-0.00631558	2567	-0.214693	1075	506	372	5.28322e-08	7.2771	-7.2771	1075	3.09567e-07	chr11	33397607	33398494	33397607	FALSE	TRUE
chr11_33722142_33722599	0.0335915	0.033911	0.000319496	8594	0.0106783	8470	506	372	0.78676	0.104158	0.104158	8469.5	0.833196	chr11	33722142	33722599	33722142	FALSE	FALSE
chr11_33757476_33758122	0.0187336	0.0181859	-0.000547629	5575	-0.0946492	3589	506	372	0.0164461	1.78394	-1.78394	3588	0.0330704	chr11	33757476	33758122	33757476	FALSE	FALSE
chr11_33795392_33796319	0.0477243	0.046327	-0.00139727	3977	-0.133527	2326	506	372	0.000713702	3.14648	-3.14648	2324	0.00203548	chr11	33795392	33796319	33795392	FALSE	FALSE
chr11_33890357_33891495	0.103104	0.132465	0.0293612	12201	0.14531	11322	506	372	0.000230575	3.63719	3.63719	11322	0.000731178	chr11	33890357	33891495	33890357	FALSE	TRUE
chr11_34072986_34074703	0.0459286	0.0459162	-1.2368e-05	7624	-0.0390582	6332	506	372	0.322251	0.491805	-0.491805	6332	0.411921	chr11	34072986	34074703	34072986	FALSE	FALSE
chr11_34126828_34127573	0.046454	0.0455509	-0.000903081	4664	-0.0528497	5633.5	506	372	0.180439	0.743669	-0.743669	5633.5	0.25452	chr11	34126828	34127573	34126828	FALSE	FALSE
chr11_34195989_34196256	0.06821	0.0649233	-0.00328669	3031	-0.0679906	4810	506	372	0.0848581	1.07131	-1.07131	4810	0.135819	chr11	34195989	34196256	34195989	FALSE	FALSE
chr11_34378229_34379993	0.0323111	0.0305382	-0.00177294	3621	-0.13001	2409	506	372	0.000983798	3.00709	-3.00709	2408	0.00271768	chr11	34378229	34379993	34378229	FALSE	FALSE
chr11_34460165_34460857	0.0321674	0.029802	-0.0023654	3330	-0.144418	2066.5	506	372	0.000251919	3.59874	-3.59874	2066.5	0.000792187	chr11	34460165	34460857	34460165	FALSE	FALSE
chr11_34937328_34938380	0.0310316	0.0305393	-0.000492342	5761	-0.0868928	3863.5	506	372	0.0276464	1.55836	-1.55836	3864	0.0522643	chr11	34937328	34938380	34937328	FALSE	FALSE
chr11_35160375_35161000	0.057211	0.0581733	0.000962265	9404	0.0622211	9780	506	372	0.114811	0.940017	0.940017	9781	0.175349	chr11	35160375	35161000	35160375	FALSE	TRUE
chr11_35440375_35441882	0.0589309	0.0431018	-0.015829	1890	-0.207266	1157.5	506	372	1.49431e-07	6.82556	-6.82556	1157	8.10386e-07	chr11	35440375	35441882	35440375	FALSE	TRUE
chr11_35639629_35641485	0.0609491	0.0466399	-0.0143091	1964	-0.218571	1021	506	372	3.02812e-08	7.51883	-7.51883	1021	1.84867e-07	chr11	35639629	35641485	35639629	FALSE	FALSE
chr11_36397926_36399398	0.0391406	0.0458614	0.00672074	10953	0.161779	11567	506	372	4.12524e-05	4.38455	4.38455	11567	0.000150228	chr11	36397926	36399398	36397926	FALSE	TRUE
chr11_36531167_36531915	0.0604922	0.0597317	-0.000760525	4974	-0.0351003	6539	506	372	0.373721	0.427452	-0.427452	6539	0.464222	chr11	36531167	36531915	36531167	FALSE	FALSE
chr11_3663052_3663802	0.0696583	0.0785053	0.00884694	11163	0.135492	11167	506	372	0.000594563	3.2258	3.2258	11167	0.00172956	chr11	3663052	3663802	3663052	TRUE	FALSE
chr11_3818447_3819307	0.031024	0.030947	-7.69775e-05	7383	-0.0390582	6332	506	372	0.322251	0.491805	-0.491805	6332	0.411921	chr11	3818447	3819307	3818447	TRUE	FALSE
chr11_3829696_3830004	0.0376883	0.0414587	0.00377045	10501	0.199158	12111	506	372	4.46981e-07	6.34971	6.34971	12111	2.2628e-06	chr11	3829696	3830004	3829696	TRUE	FALSE
chr11_3861855_3862996	0.0401109	0.0401971	8.61809e-05	7984	0.0235135	8875	506	372	0.551279	0.258628	0.258628	8875	0.63295	chr11	3861855	3862996	3861855	TRUE	FALSE
chr11_3876287_3877431	0.0346615	0.0357141	0.00105261	9467	0.133718	11123.5	506	372	0.000701204	3.15416	3.15416	11123.5	0.00200194	chr11	3876287	3877431	3876287	TRUE	FALSE
chr11_406491_407871	0.196083	0.233963	0.0378803	12458	0.157954	11513	506	372	6.24386e-05	4.20455	4.20455	11513	0.000220965	chr11	406491	407871	406491	TRUE	TRUE
chr11_4115689_4116489	0.0505259	0.0505216	-4.33251e-06	7654	-0.0274342	6922	506	372	0.486918	0.312544	-0.312544	6922	0.573639	chr11	4115689	4116489	4115689	TRUE	FALSE
chr11_416419_417650	0.153949	0.22981	0.0758607	12991	0.369215	13404	506	372	8.12192e-21	20.0903	20.0903	13404	3.59567e-19	chr11	416419	417650	416419	TRUE	TRUE
chr11_43333439_43333887	0.056108	0.0554646	-0.00064341	5263	-0.0732713	4529	506	372	0.0633091	1.19853	-1.19853	4529	0.10587	chr11	43333439	43333887	43333439	FALSE	FALSE
chr11_43380241_43381040	0.0339842	0.0324692	-0.00151492	3836	-0.171852	1600	506	372	1.3267e-05	4.87723	-4.87723	1600	5.24599e-05	chr11	43380241	43381040	43380241	FALSE	FALSE
chr11_43596990_43597336	0.0708253	0.0412409	-0.0295844	1341	-0.332451	287	506	372	3.56927e-17	16.4474	-16.4474	287	8.61907e-16	chr11	43596990	43597336	43596990	FALSE	TRUE
chr11_43600712_43601409	0.0349452	0.0315141	-0.00343119	3002	-0.156424	1825	506	372	7.35131e-05	4.13364	-4.13364	1825	0.000256869	chr11	43600712	43601409	43600712	FALSE	FALSE
chr11_43602545_43603215	0.34939	0.107651	-0.241739	31	-0.233212	904	506	372	3.40224e-09	8.46823	-8.46823	904	2.43092e-08	chr11	43602545	43603215	43602545	FALSE	TRUE
chr11_43702016_43702597	0.0304173	0.0299286	-0.00048873	5770	-0.0714969	4626.5	506	372	0.0699801	1.15503	-1.15503	4626.5	0.115261	chr11	43702016	43702597	43702016	FALSE	FALSE
chr11_43902254_43902528	0.0367884	0.0346779	-0.00211051	3434	-0.129096	2425	506	372	0.00106805	2.97141	-2.97141	2424	0.00292537	chr11	43902254	43902528	43902254	FALSE	FALSE
chr11_43963626_43966048	0.0544457	0.0479913	-0.00645437	2556	-0.217976	1028.5	506	372	3.30009e-08	7.48147	-7.48147	1028.5	2.00297e-07	chr11	43963626	43966048	43963626	FALSE	TRUE
chr11_44087518_44088165	0.0413318	0.0414337	0.000101883	8038	0.0941285	10381	506	372	0.0170482	1.76832	1.76832	10381	0.034104	chr11	44087518	44088165	44087518	FALSE	FALSE
chr11_44117117_44117994	0.0406435	0.0387878	-0.00185571	3572	-0.107012	3097	506	372	0.00668378	2.17498	-2.17498	3096	0.0151135	chr11	44117117	44117994	44117117	FALSE	FALSE
chr11_44325657_44326517	0.344962	0.247736	-0.0972262	358	-0.185962	1398.5	506	372	2.43742e-06	5.61307	-5.61307	1398.5	1.097e-05	chr11	44325657	44326517	44325657	FALSE	TRUE
chr11_44327240_44327932	0.248696	0.367025	0.118329	13292	0.134876	11152	506	372	0.00062976	3.20083	3.20083	11152	0.00182022	chr11	44327240	44327932	44327240	FALSE	TRUE
chr11_44330542_44331761	0.0901591	0.0780359	-0.0121232	2092	-0.0804964	4167	506	372	0.041336	1.38367	-1.38367	4167	0.0736814	chr11	44330542	44331761	44330542	FALSE	TRUE
chr11_44332314_44332757	0.341434	0.267549	-0.0738845	548	-0.181425	1467	506	372	4.25949e-06	5.37064	-5.37064	1467	1.83593e-05	chr11	44332314	44332757	44332314	FALSE	TRUE
chr11_44337697_44338783	0.119464	0.118587	-0.000876352	4709	-0.0221429	7197	506	372	0.574727	0.240538	-0.240538	7197	0.653996	chr11	44337697	44338783	44337697	FALSE	FALSE
chr11_44586602_44587404	0.0446576	0.042641	-0.00201666	3492	-0.132592	2349	506	372	0.000777842	3.10911	-3.10911	2347	0.00219713	chr11	44586602	44587404	44586602	FALSE	FALSE
chr11_44748205_44749761	0.118383	0.156199	0.037816	12457	0.213247	12295	506	372	6.4852e-08	7.18808	7.18808	12295	3.74968e-07	chr11	44748205	44749761	44748205	FALSE	TRUE
chr11_44971048_44972685	0.0542324	0.109769	0.0555366	12789	0.287518	13042	506	372	3.16127e-13	12.5001	12.5001	13042	4.32146e-12	chr11	44971048	44972685	44971048	FALSE	FALSE
chr11_449961_451178	0.0455219	0.0448842	-0.000637785	5281	-0.0629277	5073	506	372	0.110747	0.955666	-0.955666	5073	0.170159	chr11	449961	451178	449961	TRUE	FALSE
chr11_45307441_45307975	0.0671726	0.0791952	0.0120227	11394	0.0785626	10077	506	372	0.0464666	1.33286	1.33286	10077	0.0814338	chr11	45307441	45307975	45307441	FALSE	TRUE
chr11_45686160_45687495	0.0416798	0.0383263	-0.00335351	3020	-0.150644	1929.5	506	372	0.000134475	3.87136	-3.87136	1929.5	0.000447819	chr11	45686160	45687495	45686160	FALSE	TRUE
chr11_45825615_45826872	0.0392697	0.0392424	-2.73138e-05	7563	-0.027753	6910	506	372	0.48187	0.31707	-0.31707	6910	0.568632	chr11	45825615	45826872	45825615	FALSE	FALSE
chr11_45868742_45869413	0.029424	0.0295411	0.000117101	8077	-0.0214576	7233	506	372	0.586625	0.231639	-0.231639	7233	0.664077	chr11	45868742	45869413	45868742	FALSE	FALSE
chr11_45907006_45907809	0.055375	0.0505335	-0.0048415	2750	-0.10112	3342.5	506	372	0.0103811	1.98376	-1.98376	3340.5	0.0221155	chr11	45907006	45907809	45907006	FALSE	FALSE
chr11_45923980_45924727	0.873162	0.856038	-0.0171243	1820	-0.14625	2026	506	372	0.00020993	3.67793	-3.67793	2026	0.000671846	chr11	45923980	45924727	45923980	FALSE	TRUE
chr11_45939296_45940141	0.0536187	0.0521169	-0.0015018	3854	-0.156392	1826	506	372	7.37625e-05	4.13216	-4.13216	1826	0.000257674	chr11	45939296	45940141	45939296	FALSE	FALSE
chr11_45943513_45944852	0.107202	0.135517	0.0283153	12166	0.278762	12974	506	372	1.60116e-12	11.7956	11.7956	12974	1.94537e-11	chr11	45943513	45944852	45943513	FALSE	FALSE
chr11_46354091_46355190	0.105763	0.115432	0.00966918	11232	-0.0282949	6889	506	372	0.473354	0.324814	-0.324814	6889	0.560339	chr11	46354091	46355190	46354091	FALSE	FALSE
chr11_46402624_46404139	0.0467642	0.0557549	0.00899072	11175	0.260275	12826	506	372	4.20022e-11	10.3767	10.3767	12826	4.06141e-10	chr11	46402624	46404139	46402624	FALSE	FALSE
chr11_46410921_46414687	0.0938682	0.110567	0.0166992	11687	0.141931	11271	506	372	0.000321558	3.49274	3.49274	11271	0.000991611	chr11	46410921	46414687	46410921	FALSE	FALSE
chr11_46638637_46639486	0.0325499	0.0327854	0.00023545	8410	-0.0415657	6217	506	372	0.292158	0.534382	-0.534382	6217.5	0.379579	chr11	46638637	46639486	46638637	FALSE	FALSE
chr11_46721979_46722428	0.0380224	0.0377601	-0.000262313	6659	-0.0337881	6607	506	372	0.391851	0.406879	-0.406879	6607	0.482319	chr11	46721979	46722428	46721979	FALSE	FALSE
chr11_46867194_46868077	0.0326055	0.032788	0.000182483	8275	-0.0241298	7098	506	372	0.540892	0.266889	-0.266889	7098	0.623455	chr11	46867194	46868077	46867194	FALSE	FALSE
chr11_46958170_46958529	0.0407682	0.0408192	5.09582e-05	7858	0.00769263	8378.5	506	372	0.845515	0.0728788	0.0728788	8379	0.881159	chr11	46958170	46958529	46958170	FALSE	FALSE
chr11_47198027_47198885	0.0678923	0.0646483	-0.00324399	3049	-0.15381	1869	506	372	9.68425e-05	4.01393	-4.01393	1869	0.000331294	chr11	47198027	47198885	47198027	FALSE	FALSE
chr11_47207188_47209176	0.0699162	0.0949223	0.0250061	12042	0.071465	9949	506	372	0.070105	1.15425	1.15425	9949	0.11541	chr11	47207188	47209176	47207188	FALSE	FALSE
chr11_47236404_47236933	0.028766	0.0300524	0.00128636	9624	0.181234	11867.5	506	372	4.35969e-06	5.36054	5.36054	11867.5	1.87554e-05	chr11	47236404	47236933	47236404	FALSE	FALSE
chr11_47270234_47270633	0.0394084	0.0391341	-0.000274338	6616	-0.0345744	6565	506	372	0.380925	0.419161	-0.419161	6565	0.471354	chr11	47270234	47270633	47270234	FALSE	FALSE
chr11_47291200_47291858	0.0450106	0.0444059	-0.000604711	5381	-0.0542416	5569	506	372	0.16923	0.771524	-0.771524	5569	0.241245	chr11	47291200	47291858	47291200	FALSE	FALSE
chr11_47359953_47360216	0.838461	0.847018	0.00855732	11128	0.0595064	9727	506	372	0.131522	0.881	0.881	9727	0.196421	chr11	47359953	47360216	47359953	FALSE	TRUE
chr11_47399788_47400006	0.816011	0.851746	0.0357344	12393	0.195248	12055	506	372	7.47217e-07	6.12655	6.12655	12055	3.6504e-06	chr11	47399788	47400006	47399788	FALSE	FALSE
chr11_47429733_47430346	0.0237385	0.023413	-0.000325492	6406	-0.0672256	4849	506	372	0.0884226	1.05344	-1.05344	4849.5	0.14071	chr11	47429733	47430346	47429733	FALSE	FALSE
chr11_47447704_47448257	0.0318294	0.0316963	-0.000133093	7174	-0.0334693	6618	506	372	0.396334	0.401938	-0.401938	6618	0.486997	chr11	47447704	47448257	47447704	FALSE	FALSE
chr11_47586848_47587608	0.0286176	0.0290747	0.000457119	8837	0.078382	10075	506	372	0.0469721	1.32816	1.32816	10075	0.0821921	chr11	47586848	47587608	47586848	FALSE	FALSE
chr11_47600129_47600927	0.0329238	0.0315092	-0.00141459	3961	-0.106103	3139	506	372	0.00716286	2.14491	-2.14491	3138	0.0160151	chr11	47600129	47600927	47600129	FALSE	FALSE
chr11_47611138_47612438	0.813323	0.86079	0.0474665	12653	0.255153	12790	506	372	9.99474e-11	10.0002	10.0002	12790	9.17957e-10	chr11	47611138	47612438	47611138	FALSE	TRUE
chr11_47663577_47664331	0.0350658	0.0355883	0.000522468	8937	0.0194016	8759	506	372	0.622987	0.205521	0.205521	8759	0.696222	chr11	47663577	47664331	47663577	FALSE	FALSE
chr11_47788200_47789022	0.0220459	0.0217478	-0.000298098	6510	-0.0709922	4658.5	506	372	0.0719795	1.14279	-1.14279	4658.5	0.118009	chr11	47788200	47789022	47788200	FALSE	FALSE
chr11_47869793_47870356	0.0433023	0.0411359	-0.00216641	3410	-0.123443	2588	506	372	0.00175589	2.7555	-2.7555	2588	0.00456829	chr11	47869793	47870356	47869793	FALSE	FALSE
chr11_48001604_48003170	0.0965662	0.0869456	-0.00962061	2276	-0.129117	2424	506	372	0.00106602	2.97224	-2.97224	2423	0.00292039	chr11	48001604	48003170	48001604	FALSE	FALSE
chr11_48921725_48922742	0.652725	0.645435	-0.00729001	2480	-0.0591717	5268	506	372	0.133707	0.873846	-0.873846	5268	0.199113	chr11	48921725	48922742	48921725	FALSE	TRUE
chr11_494853_495156	0.894524	0.867273	-0.0272508	1413	-0.362616	187	506	372	3.89883e-20	19.4091	-19.4091	187	1.50477e-18	chr11	494853	495156	494853	TRUE	FALSE
chr11_50257255_50257772	0.773239	0.709767	-0.0634717	677	-0.217232	1039	506	372	3.6735e-08	7.43492	-7.43492	1039	2.20981e-07	chr11	50257255	50257772	50257255	FALSE	TRUE
chr11_506353_508009	0.0887204	0.0787791	-0.00994129	2248	-0.134302	2311	506	372	0.000664262	3.17766	-3.17766	2309	0.00190732	chr11	506353	508009	506353	TRUE	FALSE
chr11_534691_537718	0.066203	0.0910561	0.0248531	12039	0.284011	13021	506	372	6.08913e-13	12.2154	12.2154	13021	8.01646e-12	chr11	534691	537718	534691	TRUE	FALSE
chr11_554713_556560	0.191144	0.18333	-0.00781399	2421	-0.0731757	4535	506	372	0.0636547	1.19617	-1.19617	4535	0.106369	chr11	554713	556560	554713	TRUE	TRUE
chr11_560382_561397	0.0348813	0.035345	0.000463706	8849	0.107665	10661	506	372	0.00635721	2.19673	2.19673	10661	0.0144498	chr11	560382	561397	560382	TRUE	FALSE
chr11_567938_569461	0.151001	0.156928	0.00592707	10866	0.0966361	10444.5	506	372	0.0143165	1.84416	1.84416	10444.5	0.0293058	chr11	567938	569461	567938	TRUE	FALSE
chr11_57091614_57092831	0.0327405	0.0324404	-0.00030015	6504	-0.0475583	5901	506	372	0.228092	0.64189	-0.64189	5901	0.309926	chr11	57091614	57092831	57091614	FALSE	FALSE
chr11_57102841_57103430	0.0216711	0.0213914	-0.000279699	6594	-0.0582154	5317	506	372	0.140104	0.85355	-0.85355	5317	0.206978	chr11	57102841	57103430	57102841	FALSE	FALSE
chr11_57226766_57228707	0.0729246	0.0685128	-0.00441177	2816	-0.0862446	3895.5	506	372	0.0288274	1.5402	-1.5402	3895.5	0.0541718	chr11	57226766	57228707	57226766	FALSE	FALSE
chr11_57232313_57232573	0.604824	0.66016	0.0553358	12785	0.192093	12015	506	372	1.12342e-06	5.94946	5.94946	12015	5.32878e-06	chr11	57232313	57232573	57232313	FALSE	FALSE
chr11_57267006_57267316	0.24103	0.170086	-0.0709446	581	-0.237144	858	506	372	1.84891e-09	8.73308	-8.73308	858	1.38612e-08	chr11	57267006	57267316	57267006	FALSE	FALSE
chr11_57281671_57283305	0.0347058	0.0319045	-0.00280128	3171	-0.221386	999	506	372	2.00964e-08	7.69688	-7.69688	999	1.2604e-07	chr11	57281671	57283305	57281671	FALSE	FALSE
chr11_57334971_57335486	0.104507	0.101663	-0.00284444	3162	-0.149135	1958	506	372	0.000156908	3.80436	-3.80436	1958	0.00051643	chr11	57334971	57335486	57334971	FALSE	FALSE
chr11_57424937_57425262	0.0282217	0.0280257	-0.000196025	6923	-0.0551553	5522	506	372	0.16216	0.790056	-0.790056	5522	0.232661	chr11	57424937	57425262	57424937	FALSE	FALSE
chr11_57434542_57434788	0.0426681	0.0425533	-0.000114813	7240	-0.0230726	7145	506	372	0.558771	0.252766	-0.252766	7145	0.639979	chr11	57434542	57434788	57434542	FALSE	FALSE
chr11_57435204_57436146	0.04964	0.046408	-0.00323194	3050	-0.143451	2085	506	372	0.000277125	3.55732	-3.55732	2085	0.000863435	chr11	57435204	57436146	57435204	FALSE	FALSE
chr11_57479486_57480308	0.0362515	0.0357204	-0.000531152	5629	-0.0850546	3967.5	506	372	0.0311089	1.50712	-1.50712	3967.5	0.0576751	chr11	57479486	57480308	57479486	FALSE	FALSE
chr11_575464_577093	0.0332801	0.0318141	-0.00146601	3896	-0.145342	2045	506	372	0.000229845	3.63857	-3.63857	2045	0.000729376	chr11	575464	577093	575464	TRUE	FALSE
chr11_58345673_58347321	0.04952	0.0485611	-0.000958949	4554	-0.115931	2816	506	372	0.00330032	2.48144	-2.48144	2815	0.00803404	chr11	58345673	58347321	58345673	FALSE	FALSE
chr11_58910127_58910584	0.0260615	0.0258429	-0.000218609	6828	-0.0608823	5176	506	372	0.122831	0.910694	-0.910694	5176	0.185526	chr11	58910127	58910584	58910127	FALSE	FALSE
chr11_58939046_58940308	0.0316917	0.0310729	-0.000618765	5342	-0.0811445	4138.5	506	372	0.0397275	1.40091	-1.40091	4138	0.0712832	chr11	58939046	58940308	58939046	FALSE	FALSE
chr11_59436201_59437232	0.0343144	0.0340702	-0.000244141	6733	-0.019731	7319.5	506	372	0.617096	0.209647	-0.209647	7319.5	0.690835	chr11	59436201	59437232	59436201	FALSE	FALSE
chr11_59522425_59523303	0.0380707	0.0387647	0.000694036	9145	0.145214	11319	506	372	0.000232778	3.63306	3.63306	11319	0.000737301	chr11	59522425	59523303	59522425	FALSE	FALSE
chr11_59578090_59578379	0.0702211	0.0704493	0.000228196	8391	0.00433508	8269.5	506	372	0.912613	0.0397133	0.0397133	8269.5	0.934339	chr11	59578090	59578379	59578090	FALSE	FALSE
chr11_60282783_60283045	0.883216	0.898442	0.015226	11602	0.130089	11054	506	372	0.00097675	3.01022	3.01022	11054	0.00270097	chr11	60282783	60283045	60282783	FALSE	TRUE
chr11_60673597_60674184	0.0384736	0.0385157	4.20809e-05	7823	-0.0219729	7205.5	506	372	0.577668	0.238322	-0.238322	7205.5	0.656626	chr11	60673597	60674184	60673597	FALSE	FALSE
chr11_60681552_60682268	0.0156791	0.0156841	4.94905e-06	7693	-0.0285711	6880	506	372	0.469044	0.328786	-0.328786	6880	0.555967	chr11	60681552	60682268	60681552	FALSE	FALSE
chr11_60691785_60692532	0.0272132	0.026533	-0.000680149	5165	-0.0668855	4870.5	506	372	0.0900451	1.04554	-1.04554	4871	0.142838	chr11	60691785	60692532	60691785	FALSE	FALSE
chr11_60775036_60776307	0.487063	0.428065	-0.0589982	751	-0.215468	1064	506	372	4.73021e-08	7.32512	-7.32512	1064	2.79704e-07	chr11	60775036	60776307	60775036	FALSE	TRUE
chr11_60928560_60929262	0.0443518	0.0417455	-0.00260638	3245	-0.184283	1431	506	372	3.00109e-06	5.52272	-5.52272	1431	1.32602e-05	chr11	60928560	60929262	60928560	FALSE	FALSE
chr11_61061751_61063063	0.150956	0.132268	-0.0186877	1750	-0.0628692	5076	506	372	0.111079	0.954368	-0.954368	5076	0.170572	chr11	61061751	61063063	61061751	FALSE	FALSE
chr11_61100073_61100972	0.0202058	0.0201221	-8.37557e-05	7359	-0.0619448	5117	506	372	0.116431	0.933931	-0.933931	5117.5	0.177403	chr11	61100073	61100972	61100073	FALSE	FALSE
chr11_61106710_61106927	0.983052	0.983603	0.000550985	8973	0.100817	10525	506	372	0.0106128	1.97417	1.97417	10525	0.0225595	chr11	61106710	61106927	61106710	FALSE	FALSE
chr11_61129221_61129879	0.0418844	0.0416434	-0.000241045	6746	-0.0490034	5814.5	506	372	0.214268	0.669042	-0.669042	5814.5	0.294241	chr11	61129221	61129879	61129221	FALSE	FALSE
chr11_61196921_61197697	0.0579271	0.0567531	-0.00117395	4226	-0.106741	3107	506	372	0.00682356	2.16599	-2.16599	3106	0.0153834	chr11	61196921	61197697	61196921	FALSE	FALSE
chr11_61275825_61277329	0.155782	0.236569	0.0807871	13040	0.344894	13326.5	506	372	2.29818e-18	17.6386	17.6386	13326.5	6.75344e-17	chr11	61275825	61277329	61275825	FALSE	TRUE
chr11_61322732_61323285	0.203595	0.183767	-0.0198283	1702	-0.148923	1964	506	372	0.000160337	3.79497	-3.79497	1964	0.000526565	chr11	61322732	61323285	61322732	FALSE	TRUE
chr11_61347808_61349038	0.106787	0.0993968	-0.00739014	2472	-0.0423095	6169	506	372	0.283608	0.547282	-0.547282	6169	0.370566	chr11	61347808	61349038	61347808	FALSE	FALSE
chr11_61447599_61448273	0.0352539	0.0334877	-0.00176611	3625	-0.0652386	4949.5	506	372	0.098246	1.00769	-1.00769	4949.5	0.153848	chr11	61447599	61448273	61447599	FALSE	FALSE
chr11_614760_616068	0.151843	0.188828	0.0369848	12434	0.172404	11730.5	506	372	1.24441e-05	4.90504	4.90504	11730.5	4.94804e-05	chr11	614760	616068	614760	TRUE	FALSE
chr11_61559907_61560549	0.0324848	0.0322733	-0.000211563	6864	-0.0546666	5544	506	372	0.165913	0.780119	-0.780119	5544	0.237241	chr11	61559907	61560549	61559907	FALSE	FALSE
chr11_61582573_61584728	0.0395747	0.0380428	-0.00153197	3812	-0.155367	1846	506	372	8.22241e-05	4.085	-4.085	1846	0.000284591	chr11	61582573	61584728	61582573	FALSE	FALSE
chr11_61594996_61596710	0.0496791	0.0438904	-0.00578868	2624	-0.0749501	4428	506	372	0.0574902	1.24041	-1.24041	4428	0.0977313	chr11	61594996	61596710	61594996	FALSE	FALSE
chr11_61658569_61659592	0.0578411	0.0660978	0.00825666	11098	0.283108	13011	506	372	7.20011e-13	12.1427	12.1427	13011	9.30724e-12	chr11	61658569	61659592	61658569	FALSE	FALSE
chr11_617226_617797	0.935407	0.937891	0.00248384	10139	0.110401	10711	506	372	0.00514024	2.28902	2.28902	10711	0.0119709	chr11	617226	617797	617226	TRUE	FALSE
chr11_61734760_61735932	0.0753883	0.0759845	0.000596225	9042	0.103335	10566	506	372	0.00881824	2.05462	2.05462	10566	0.0191505	chr11	61734760	61735932	61734760	FALSE	FALSE
chr11_61891198_61891726	0.0452117	0.0457416	0.000529837	8947	0.00380382	8247.5	506	372	0.9233	0.0346571	0.0346571	8248	0.942218	chr11	61891198	61891726	61891198	FALSE	FALSE
chr11_62341228_62341695	0.0385284	0.0367576	-0.00177079	3622	-0.0742063	4483.5	506	372	0.0600109	1.22177	-1.22177	4483.5	0.101178	chr11	62341228	62341695	62341228	FALSE	FALSE
chr11_62358813_62359674	0.0357304	0.0350577	-0.00067272	5191	-0.103617	3246	506	372	0.00863547	2.06371	-2.06371	3245	0.0188108	chr11	62358813	62359674	62358813	FALSE	FALSE
chr11_62368454_62370491	0.0491776	0.0519904	0.00281284	10238	0.0949148	10403	506	372	0.0161462	1.79193	1.79193	10403	0.0325397	chr11	62368454	62370491	62368454	FALSE	FALSE
chr11_62379638_62380556	0.0496467	0.05072	0.00107339	9476	0.0520209	9563	506	372	0.18737	0.727299	0.727299	9564	0.26271	chr11	62379638	62380556	62379638	FALSE	FALSE
chr11_62389337_62389791	0.0551065	0.0540221	-0.00108435	4362	-0.0810383	4147.5	506	372	0.0399875	1.39808	-1.39808	4147.5	0.0716358	chr11	62389337	62389791	62389337	FALSE	FALSE
chr11_62413632_62414293	0.032248	0.0317417	-0.000506371	5716	-0.0389254	6341	506	372	0.3239	0.489589	-0.489589	6341	0.413638	chr11	62413632	62414293	62413632	FALSE	FALSE
chr11_62420544_62420924	0.0347865	0.0349558	0.000169318	8236	-0.0392813	6319	506	372	0.319494	0.495537	-0.495537	6319	0.409014	chr11	62420544	62420924	62420544	FALSE	FALSE
chr11_62432319_62433417	0.0444735	0.0441704	-0.00030309	6489	-0.0510593	5718	506	372	0.195657	0.708506	-0.708506	5718	0.272663	chr11	62432319	62433417	62432319	FALSE	FALSE
chr11_62439047_62439803	0.0296282	0.0301997	0.00057143	9001	0.116951	10815	506	372	0.0030353	2.5178	2.5178	10815	0.00745995	chr11	62439047	62439803	62439047	FALSE	FALSE
chr11_62446038_62446613	0.0247253	0.024297	-0.000428297	6002	-0.0682881	4795.5	506	372	0.0835037	1.07829	-1.07829	4795.5	0.133873	chr11	62446038	62446613	62446038	FALSE	FALSE
chr11_62473453_62474156	0.0411457	0.036675	-0.00447071	2811	-0.123826	2578	506	372	0.00169883	2.76985	-2.76985	2578	0.00443517	chr11	62473453	62474156	62473453	FALSE	FALSE
chr11_62476770_62477481	0.0444016	0.0452153	0.000813678	9298	0.0589485	9711	506	372	0.135179	0.869091	0.869091	9711	0.200841	chr11	62476770	62477481	62476770	FALSE	FALSE
chr11_62521370_62521962	0.0493383	0.0488119	-0.000526339	5639	-0.0444558	6055	506	372	0.25989	0.58521	-0.58521	6055	0.345475	chr11	62521370	62521962	62521370	FALSE	FALSE
chr11_62528903_62529428	0.0386863	0.0394256	0.000739269	9200	0.0366781	9220	506	372	0.352621	0.452692	0.452692	9220	0.443091	chr11	62528903	62529428	62528903	FALSE	FALSE
chr11_62554066_62555262	0.0327466	0.032493	-0.000253659	6697	-0.0494071	5795	506	372	0.210516	0.676715	-0.676715	5795	0.289941	chr11	62554066	62555262	62554066	FALSE	FALSE
chr11_6255768_6256179	0.0262305	0.0258688	-0.000361716	6250	-0.0372944	6430	506	372	0.344589	0.462699	-0.462699	6430	0.434691	chr11	6255768	6256179	6255768	TRUE	FALSE
chr11_62559099_62559555	0.0301492	0.0295695	-0.000579661	5460	-0.0659399	4917	506	372	0.0946838	1.02372	-1.02372	4917	0.149114	chr11	62559099	62559555	62559099	FALSE	FALSE
chr11_62572710_62573149	0.0304537	0.030348	-0.000105649	7277	-0.0358069	6496	506	372	0.364177	0.438687	-0.438687	6496	0.454702	chr11	62572710	62573149	62572710	FALSE	FALSE
chr11_62598679_62600064	0.035975	0.0350981	-0.000876922	4708	-0.101364	3329	506	372	0.0101973	1.99151	-1.99151	3327	0.0217823	chr11	62598679	62600064	62598679	FALSE	FALSE
chr11_62623359_62623877	0.0399662	0.038528	-0.00143818	3929	-0.151005	1920	506	372	0.000129571	3.88749	-3.88749	1920	0.000433193	chr11	62623359	62623877	62623359	FALSE	FALSE
chr11_62648237_62649161	0.03729	0.0370403	-0.000249684	6707	-0.0618173	5128	506	372	0.117185	0.931129	-0.931129	5128	0.178331	chr11	62648237	62649161	62648237	FALSE	FALSE
chr11_626728_628037	0.82572	0.841559	0.0158391	11638	0.0904203	10313	506	372	0.0219243	1.65908	1.65908	10313	0.0425757	chr11	626728	628037	626728	TRUE	TRUE
chr11_62690974_62691488	0.113389	0.14101	0.0276212	12139	0.0886672	10285.5	506	372	0.0246246	1.60863	1.60863	10285.5	0.0472908	chr11	62690974	62691488	62690974	FALSE	TRUE
chr11_62693373_62694772	0.268442	0.34977	0.081328	13049	0.233595	12558	506	372	3.2076e-09	8.49382	8.49382	12558	2.30156e-08	chr11	62693373	62694772	62693373	FALSE	TRUE
chr11_6281076_6281307	0.0511183	0.0365421	-0.0145762	1949	-0.282938	513	506	372	7.43044e-13	12.129	-12.129	513	9.57756e-12	chr11	6281076	6281307	6281076	TRUE	TRUE
chr11_6292256_6292693	0.86798	0.878949	0.0109685	11315	0.0609992	9757	506	372	0.122113	0.913237	0.913237	9757	0.184628	chr11	6292256	6292693	6292256	TRUE	TRUE
chr11_63258378_63258804	0.0460679	0.0597685	0.0137006	11510	0.00774576	8383	506	372	0.844461	0.0734206	0.0734206	8383	0.880535	chr11	63258378	63258804	63258378	FALSE	TRUE
chr11_63381143_63382096	0.068351	0.0729836	0.00463258	10655	0.121743	10898	506	372	0.00203143	2.6922	2.6922	10898	0.00519831	chr11	63381143	63382096	63381143	FALSE	FALSE
chr11_6340445_6341909	0.125481	0.19668	0.0711987	12953	0.159675	11532	506	372	5.18721e-05	4.28507	4.28507	11532	0.00018551	chr11	6340445	6341909	6340445	TRUE	TRUE
chr11_63438301_63439314	0.0510108	0.0516761	0.000665285	9115	0.12305	10920	506	372	0.00181637	2.7408	2.7408	10920	0.00470484	chr11	63438301	63439314	63438301	FALSE	FALSE
chr11_63448704_63449386	0.0309221	0.0301613	-0.000760835	4972	-0.0479302	5873.5	506	372	0.224475	0.648832	-0.648832	5874	0.306055	chr11	63448704	63449386	63448704	FALSE	FALSE
chr11_63529888_63531834	0.545277	0.534495	-0.0107824	2182	-0.0375282	6421	506	372	0.341573	0.466516	-0.466516	6421	0.431489	chr11	63529888	63531834	63529888	FALSE	FALSE
chr11_63535652_63537435	0.0961861	0.153326	0.0571399	12814	0.154203	11462	506	372	9.29347e-05	4.03182	4.03182	11462	0.000318973	chr11	63535652	63537435	63535652	FALSE	FALSE
chr11_63580537_63581740	0.0451383	0.0448223	-0.000316009	6443	-0.037135	6437	506	372	0.346655	0.460102	-0.460102	6437	0.43685	chr11	63580537	63581740	63580537	FALSE	FALSE
chr11_63606114_63607474	0.0300648	0.0293232	-0.000741567	5024	-0.0551341	5523	506	372	0.162322	0.789623	-0.789623	5523	0.232843	chr11	63606114	63607474	63606114	FALSE	FALSE
chr11_63683743_63684628	0.104511	0.0902716	-0.0142397	1969	-0.212142	1100	506	372	7.57913e-08	7.12038	-7.12038	1100	4.33225e-07	chr11	63683743	63684628	63683743	FALSE	FALSE
chr11_636906_640628	0.518688	0.559987	0.0412989	12538	0.0577798	9685	506	372	0.143095	0.844376	0.844376	9685	0.210593	chr11	636906	640628	636906	TRUE	FALSE
chr11_63741900_63742614	0.0432373	0.0422614	-0.000975847	4523.5	-0.094766	3585.5	506	372	0.0163135	1.78745	-1.78745	3584	0.0328282	chr11	63741900	63742614	63741900	FALSE	FALSE
chr11_63753414_63754454	0.0599626	0.0576495	-0.00231306	3350	-0.0651005	4959	506	372	0.0989601	1.00454	-1.00454	4959	0.154769	chr11	63753414	63754454	63753414	FALSE	FALSE
chr11_63766058_63768666	0.329542	0.515021	0.185479	13447	0.328998	13259	506	372	7.50976e-17	16.1244	16.1244	13259	1.71849e-15	chr11	63766058	63768666	63766058	FALSE	FALSE
chr11_63803375_63804365	0.0715365	0.0641648	-0.0073717	2474	-0.216106	1054	506	372	4.31808e-08	7.36471	-7.36471	1054	2.56791e-07	chr11	63803375	63804365	63803375	FALSE	FALSE
chr11_63852803_63853082	0.912365	0.919065	0.00670075	10952	0.0722353	9963	506	372	0.0671369	1.17304	1.17304	9963	0.11135	chr11	63852803	63853082	63852803	FALSE	FALSE
chr11_63932990_63934070	0.0401927	0.0418311	0.00163838	9807	0.170917	11705	506	372	1.47791e-05	4.83035	4.83035	11705	5.79317e-05	chr11	63932990	63934070	63932990	FALSE	FALSE
chr11_63952677_63954228	0.033709	0.0335279	-0.000181094	6989	-0.0418314	6200.5	506	372	0.289085	0.538975	-0.538975	6200.5	0.376416	chr11	63952677	63954228	63952677	FALSE	FALSE
chr11_63997662_63998412	0.0523512	0.0515251	-0.000826087	4820	-0.0104977	7719	506	372	0.790284	0.102217	-0.102217	7719	0.836143	chr11	63997662	63998412	63997662	FALSE	FALSE
chr11_64001572_64002712	0.0385812	0.0400996	0.00151838	9752	0.178418	11816	506	372	6.12328e-06	5.21302	5.21302	11816	2.5642e-05	chr11	64001572	64002712	64001572	FALSE	FALSE
chr11_64008283_64009487	0.0299742	0.0299475	-2.67364e-05	7566	0.00932891	8419	506	372	0.813186	0.0898101	0.0898101	8419	0.854236	chr11	64008283	64009487	64008283	FALSE	FALSE
chr11_64013772_64015341	0.123031	0.113732	-0.00929915	2296	-0.196821	1266.5	506	372	6.08408e-07	6.21581	-6.21581	1266.5	3.00916e-06	chr11	64013772	64015341	64013772	FALSE	FALSE
chr11_64018435_64019377	0.0437243	0.0416697	-0.00205458	3471	-0.0781589	4277.5	506	372	0.0476029	1.32237	-1.32237	4277.5	0.0831456	chr11	64018435	64019377	64018435	FALSE	FALSE
chr11_64036875_64037974	0.0299325	0.0296434	-0.000289001	6545	-0.022451	7175	506	372	0.569415	0.244571	-0.244571	7175	0.649315	chr11	64036875	64037974	64036875	FALSE	FALSE
chr11_64038964_64039306	0.0602369	0.0355339	-0.024703	1512	-0.350291	220	506	372	6.78194e-19	18.1686	-18.1686	220	2.17198e-17	chr11	64038964	64039306	64038964	FALSE	FALSE
chr11_64052607_64053652	0.0310213	0.0298373	-0.00118405	4213	-0.0943198	3598	506	372	0.0168248	1.77405	-1.77405	3597	0.0337218	chr11	64052607	64053652	64052607	FALSE	FALSE
chr11_64058808_64060118	0.100796	0.0930222	-0.00777406	2429	-0.124782	2546	506	372	0.00156356	2.80588	-2.80588	2546	0.00412173	chr11	64058808	64060118	64058808	FALSE	TRUE
chr11_64066757_64068741	0.103017	0.114511	0.0114938	11360	0.119459	10856	506	372	0.00246425	2.60831	2.60831	10856	0.00619355	chr11	64066757	64068741	64066757	FALSE	FALSE
chr11_64072064_64073914	0.160948	0.161712	0.000764087	9240	0.0228707	8858	506	372	0.562217	0.250096	0.250096	8858	0.642839	chr11	64072064	64073914	64072064	FALSE	FALSE
chr11_64084646_64086057	0.0384088	0.0378349	-0.000573836	5476	-0.0911641	3724.5	506	372	0.0208589	1.68071	-1.68071	3723.5	0.0406817	chr11	64084646	64086057	64084646	FALSE	FALSE
chr11_64112327_64112607	0.933155	0.932993	-0.000162125	7066	-0.0360938	6480.5	506	372	0.360346	0.44328	-0.44328	6480.5	0.450957	chr11	64112327	64112607	64112327	FALSE	TRUE
chr11_6411346_6411913	0.0299534	0.0296393	-0.000314057	6447	-0.0657008	4929	506	372	0.0958864	1.01824	-1.01824	4929	0.150675	chr11	6411346	6411913	6411346	TRUE	FALSE
chr11_64126430_64126960	0.0333251	0.0325616	-0.000763521	4964	-0.0386332	6353.5	506	372	0.327546	0.484728	-0.484728	6353.5	0.417546	chr11	64126430	64126960	64126430	FALSE	FALSE
chr11_64135815_64136381	0.960365	0.962105	0.00174004	9860	0.101545	10535	506	372	0.0100634	1.99726	1.99726	10535	0.0215301	chr11	64135815	64136381	64135815	FALSE	FALSE
chr11_64136814_64138187	0.924367	0.925488	0.00112128	9523	0.0649836	9840	506	372	0.0995675	1.00188	1.00188	9842	0.155558	chr11	64136814	64138187	64136814	FALSE	TRUE
chr11_64335489_64335965	0.845258	0.849228	0.00396991	10540	0.0491468	9501	506	372	0.21293	0.671764	0.671764	9501	0.292759	chr11	64335489	64335965	64335489	FALSE	TRUE
chr11_643879_644377	0.916054	0.92173	0.00567615	10835	0.0718794	9956	506	372	0.0684952	1.16434	1.16434	9956	0.113256	chr11	643879	644377	643879	TRUE	FALSE
chr11_6439863_6440732	0.0382657	0.0357276	-0.00253816	3276	-0.125143	2537	506	372	0.0015151	2.81956	-2.81956	2537	0.00400722	chr11	6439863	6440732	6439863	TRUE	FALSE
chr11_64480199_64481344	0.181859	0.365661	0.183802	13443	0.25459	12776	506	372	1.09833e-10	9.95927	9.95927	12776	9.96591e-10	chr11	64480199	64481344	64480199	FALSE	FALSE
chr11_64490493_64491146	0.0294504	0.0290582	-0.000392228	6132	-0.0574079	5377	506	372	0.145687	0.83658	-0.83658	5377	0.213341	chr11	64490493	64491146	64490493	FALSE	FALSE
chr11_64509433_64513826	0.133087	0.140937	0.0078499	11059	0.12287	10918	506	372	0.00184479	2.73405	2.73405	10918	0.00477117	chr11	64509433	64513826	64509433	FALSE	TRUE
chr11_64532936_64533763	0.934803	0.933564	-0.00123906	4148	-0.0253995	7032	506	372	0.519805	0.28416	-0.28416	7032	0.60429	chr11	64532936	64533763	64532936	FALSE	FALSE
chr11_64545666_64546684	0.0257312	0.0252863	-0.000444852	5944	-0.0979642	3461	506	372	0.0130323	1.88498	-1.88498	3459	0.0269869	chr11	64545666	64546684	64545666	FALSE	FALSE
chr11_64577277_64578349	0.069088	0.0718189	0.00273095	10215	0.12916	11027	506	372	0.00106196	2.97389	2.97389	11027	0.00291046	chr11	64577277	64578349	64577277	FALSE	FALSE
chr11_64621207_64622246	0.754262	0.787267	0.0330053	12322	0.287555	13043	506	372	3.13923e-13	12.5032	12.5032	13043	4.29568e-12	chr11	64621207	64622246	64621207	FALSE	FALSE
chr11_64645429_64646566	0.041073	0.0401557	-0.000917353	4643	-0.112234	2926	506	372	0.00444718	2.35192	-2.35192	2926	0.0105068	chr11	64645429	64646566	64645429	FALSE	FALSE
chr11_64684599_64684826	0.0433865	0.0426731	-0.00071346	5082	-0.0631986	5061.5	506	372	0.10922	0.961699	-0.961699	5061.5	0.168136	chr11	64684599	64684826	64684599	FALSE	FALSE
chr11_64692060_64692496	0.0347355	0.0340165	-0.000718966	5071	-0.0889966	3781	506	372	0.0240963	1.61805	-1.61805	3780	0.046388	chr11	64692060	64692496	64692060	FALSE	FALSE
chr11_64739010_64739750	0.309354	0.395667	0.086313	13089	0.116367	10805	506	372	0.00318466	2.49694	2.49694	10805	0.00778606	chr11	64739010	64739750	64739010	FALSE	TRUE
chr11_64781450_64782385	0.036891	0.0366202	-0.000270836	6626	-0.0504696	5746	506	372	0.200869	0.697087	-0.697087	5746	0.278809	chr11	64781450	64782385	64781450	FALSE	FALSE
chr11_64794832_64795362	0.0323965	0.0327372	0.000340734	8632	0.0494709	9512	506	372	0.209928	0.67793	0.67793	9512	0.289425	chr11	64794832	64795362	64794832	FALSE	FALSE
chr11_64808330_64809264	0.0296018	0.0292533	-0.000348516	6315	-0.0294211	6836	506	372	0.455921	0.34111	-0.34111	6836	0.543886	chr11	64808330	64809264	64808330	FALSE	FALSE
chr11_64851302_64851828	0.0205877	0.0199579	-0.000629857	5308	-0.113477	2894	506	372	0.00402653	2.39507	-2.39507	2893	0.00959665	chr11	64851302	64851828	64851302	FALSE	FALSE
chr11_64875134_64876243	0.922804	0.92819	0.00538611	10789	0.135264	11160	506	372	0.000607391	3.21653	3.21653	11160	0.00176309	chr11	64875134	64876243	64875134	FALSE	FALSE
chr11_64879046_64880413	0.118766	0.127254	0.00848798	11116	0.146224	11339	506	372	0.000210489	3.67677	3.67677	11339	0.000673156	chr11	64879046	64880413	64879046	FALSE	FALSE
chr11_64884115_64885448	0.0518081	0.0475531	-0.00425497	2845	-0.213131	1091	506	372	6.59324e-08	7.1809	-7.1809	1091	3.81052e-07	chr11	64884115	64885448	64884115	FALSE	FALSE
chr11_64889136_64889931	0.0342032	0.0342147	1.14888e-05	7725	-0.00268817	8009.5	506	372	0.945785	0.0242074	-0.0242074	8009.5	0.959311	chr11	64889136	64889931	64889136	FALSE	FALSE
chr11_64901526_64902107	0.0203774	0.0201745	-0.000202967	6898	-0.0643089	4996	506	372	0.103133	0.986604	-0.986604	4996	0.160241	chr11	64901526	64902107	64901526	FALSE	FALSE
chr11_64948715_64949060	0.041991	0.0425572	0.000566293	8994	0.00969017	8431	506	372	0.806089	0.0936169	0.0936169	8431	0.848492	chr11	64948715	64949060	64948715	FALSE	FALSE
chr11_6502423_6502927	0.0238604	0.0235749	-0.000285469	6562	-0.0591292	5270.5	506	372	0.133987	0.872939	-0.872939	5270.5	0.199463	chr11	6502423	6502927	6502423	TRUE	FALSE
chr11_65029040_65029926	0.0313833	0.0316344	0.000251114	8443	0.00576948	8314.5	506	372	0.883843	0.053625	0.053625	8314.5	0.911288	chr11	65029040	65029926	65029040	FALSE	FALSE
chr11_65081937_65083333	0.0344313	0.0384686	0.00403731	10553	0.235103	12579	506	372	2.54025e-09	8.59512	8.59512	12579	1.86216e-08	chr11	65081937	65083333	65081937	FALSE	FALSE
chr11_65101109_65101843	0.0333295	0.033301	-2.85506e-05	7560	-0.0220579	7201	506	372	0.576197	0.239429	-0.239429	7201	0.655393	chr11	65101109	65101843	65101109	FALSE	FALSE
chr11_65121938_65122712	0.0246776	0.024883	0.000205351	8339	0.022706	8851	506	372	0.565036	0.247924	0.247924	8851	0.645463	chr11	65121938	65122712	65121938	FALSE	FALSE
chr11_65153726_65154606	0.058193	0.0553349	-0.00285813	3155	-0.0541991	5570	506	372	0.169564	0.770666	-0.770666	5570	0.241671	chr11	65153726	65154606	65153726	FALSE	FALSE
chr11_65189463_65190295	0.0400205	0.0404893	0.000468835	8856	0.124612	10951	506	372	0.00158686	2.79946	2.79946	10951	0.00417665	chr11	65189463	65190295	65189463	FALSE	FALSE
chr11_65264957_65265398	0.0267003	0.0258865	-0.000813778	4844	-0.117366	2771.5	506	372	0.0029333	2.53264	-2.53264	2771	0.00723287	chr11	65264957	65265398	65264957	FALSE	FALSE
chr11_65305935_65308502	0.472064	0.491017	0.0189522	11799	0.318288	13214	506	372	7.18936e-16	15.1433	15.1433	13214	1.4054e-14	chr11	65305935	65308502	65305935	FALSE	FALSE
chr11_65314912_65315476	0.813277	0.828741	0.015464	11619	0.14523	11320	506	372	0.000232409	3.63375	3.63375	11320	0.000736478	chr11	65314912	65315476	65314912	FALSE	TRUE
chr11_65325081_65326209	0.151459	0.0957326	-0.0557266	799	-0.406541	85	506	372	6.74977e-25	24.1707	-24.1707	85	5.67945e-23	chr11	65325081	65326209	65325081	FALSE	FALSE
chr11_65337213_65338474	0.0271945	0.0267384	-0.000456119	5901	-0.0415657	6217	506	372	0.292158	0.534382	-0.534382	6217.5	0.379579	chr11	65337213	65338474	65337213	FALSE	FALSE
chr11_65341620_65342501	0.0548077	0.0779876	0.0231799	11977	0.272993	12928	506	372	4.54204e-12	11.3427	11.3427	12928	5.14474e-11	chr11	65341620	65342501	65341620	FALSE	FALSE
chr11_65343329_65343849	0.0543002	0.0590837	0.00478346	10681	0.269795	12904.5	506	372	8.02295e-12	11.0957	11.0957	12904.5	8.68106e-11	chr11	65343329	65343849	65343329	FALSE	FALSE
chr11_65374699_65375308	0.718032	0.808005	0.0899723	13120	0.153061	11450	506	372	0.000104722	3.97996	3.97996	11450	0.000356896	chr11	65374699	65375308	65374699	FALSE	FALSE
chr11_65382824_65383857	0.0338605	0.0336225	-0.000238083	6759	-0.0616155	5139.5	506	372	0.118386	0.926699	-0.926699	5139.5	0.179876	chr11	65382824	65383857	65382824	FALSE	FALSE
chr11_65408344_65408631	0.728663	0.761091	0.0324278	12302	0.151133	11424	506	372	0.000127881	3.89319	3.89319	11424	0.000428707	chr11	65408344	65408631	65408344	FALSE	TRUE
chr11_65413778_65415203	0.718058	0.782392	0.0643341	12886	0.290896	13058	506	372	1.66852e-13	12.7777	12.7777	13058	2.35943e-12	chr11	65413778	65415203	65413778	FALSE	TRUE
chr11_65430142_65431079	0.0327761	0.0322822	-0.000493839	5753	-0.0600536	5214.5	506	372	0.12801	0.892755	-0.892755	5214.5	0.192129	chr11	65430142	65431079	65430142	FALSE	FALSE
chr11_65479349_65480024	0.0249021	0.0244467	-0.000455428	5906	-0.0790089	4240	506	372	0.0452374	1.3445	-1.3445	4240	0.0795471	chr11	65479349	65480024	65479349	FALSE	FALSE
chr11_65487660_65488348	0.0634813	0.0668045	0.0033232	10391	0.0816546	10147	506	372	0.0384994	1.41455	1.41455	10147	0.0694567	chr11	65487660	65488348	65487660	FALSE	FALSE
chr11_65547499_65549261	0.0472137	0.0525603	0.00534666	10781	0.215022	12314	506	372	5.04112e-08	7.29747	7.29747	12314	2.96535e-07	chr11	65547499	65549261	65547499	FALSE	FALSE
chr11_65553749_65555573	0.109377	0.187997	0.0786205	13024	0.362818	13387	506	372	3.71765e-20	19.4297	19.4297	13387	1.45138e-18	chr11	65553749	65555573	65553749	FALSE	TRUE
chr11_65601069_65601551	0.0455826	0.0293143	-0.0162683	1862	-0.251031	749	506	372	1.98445e-10	9.70236	-9.70236	749	1.71779e-09	chr11	65601069	65601551	65601069	FALSE	TRUE
chr11_65624495_65628596	0.0492329	0.0483778	-0.000855111	4747	-0.128448	2440	506	372	0.0011318	2.94623	-2.94623	2439	0.0030813	chr11	65624495	65628596	65624495	FALSE	FALSE
chr11_65639835_65641374	0.100643	0.0957449	-0.00489829	2739	-0.0547622	5539.5	506	372	0.165174	0.782059	-0.782059	5539.5	0.236334	chr11	65639835	65641374	65639835	FALSE	FALSE
chr11_65655469_65656206	0.0328483	0.0331413	0.000292994	8533	-0.000233754	8086.5	506	372	0.99538	0.00201101	-0.00201101	8086	0.996999	chr11	65655469	65656206	65655469	FALSE	FALSE
chr11_65657874_65658970	0.0380293	0.0373904	-0.000638928	5278	-0.0484774	5841	506	372	0.219228	0.659104	-0.659104	5841	0.300109	chr11	65657874	65658970	65657874	FALSE	FALSE
chr11_65666676_65668209	0.0629828	0.0728596	0.00987685	11246	0.20904	12233	506	372	1.16928e-07	6.93208	6.93208	12233	6.47865e-07	chr11	65666676	65668209	65666676	FALSE	FALSE
chr11_65686287_65687554	0.0580734	0.0578655	-0.000207946	6879	-0.0570626	5395	506	372	0.148125	0.82937	-0.82937	5395	0.216304	chr11	65686287	65687554	65686287	FALSE	FALSE
chr11_65743895_65744266	0.873264	0.867338	-0.00592661	2610	-0.0792001	4231	506	372	0.044719	1.34951	-1.34951	4231	0.0788094	chr11	65743895	65744266	65743895	FALSE	FALSE
chr11_65769397_65770057	0.0628062	0.0610006	-0.00180566	3597	-0.132645	2347	506	372	0.000774059	3.11123	-3.11123	2345	0.00218872	chr11	65769397	65770057	65769397	FALSE	FALSE
chr11_65779311_65779767	0.146497	0.185308	0.0388104	12480	0.170449	11698	506	372	1.55954e-05	4.807	4.807	11698	6.0885e-05	chr11	65779311	65779767	65779311	FALSE	TRUE
chr11_65816404_65816665	0.544143	0.184865	-0.359278	5	-0.36293	186	506	372	3.62112e-20	19.4412	-19.4412	186	1.41778e-18	chr11	65816404	65816665	65816404	FALSE	TRUE
chr11_65819367_65820224	0.0283525	0.0282796	-7.29263e-05	7402.5	-0.0170109	7441	506	372	0.666448	0.176234	-0.176234	7441	0.733835	chr11	65819367	65820224	65819367	FALSE	FALSE
chr11_65837254_65838649	0.0332778	0.0372424	0.0039646	10539	0.183816	11906	506	372	3.1791e-06	5.4977	5.4977	11906	1.40056e-05	chr11	65837254	65838649	65837254	FALSE	FALSE
chr11_6591960_6592795	0.855545	0.871678	0.0161328	11653	0.119066	10849	506	372	0.00254674	2.59402	2.59402	10849	0.00637249	chr11	6591960	6592795	6591960	TRUE	TRUE
chr11_66024910_66026253	0.0315544	0.0301308	-0.00142354	3947	-0.0861915	3899.5	506	372	0.0289261	1.53871	-1.53871	3899.5	0.0543045	chr11	66024910	66026253	66024910	FALSE	FALSE
chr11_66034751_66035054	0.126234	0.0762233	-0.0500111	890	-0.20241	1200	506	372	2.89457e-07	6.53842	-6.53842	1200	1.50935e-06	chr11	66034751	66035054	66034751	FALSE	FALSE
chr11_66035216_66035447	0.0262522	0.0261106	-0.000141574	7144	-0.0100992	7737	506	372	0.798072	0.0979578	-0.0979578	7737	0.84241	chr11	66035216	66035447	66035216	FALSE	FALSE
chr11_66035828_66036808	0.0430605	0.0426799	-0.000380572	6182	-0.0716297	4616	506	372	0.0694615	1.15826	-1.15826	4616	0.114574	chr11	66035828	66036808	66035828	FALSE	FALSE
chr11_66045211_66045708	0.0286722	0.0311619	0.00248969	10141	0.0998236	10502	506	372	0.0114058	1.94288	1.94288	10502	0.0240376	chr11	66045211	66045708	66045211	FALSE	FALSE
chr11_66049750_66050229	0.173331	0.153356	-0.0199749	1696	-0.118981	2721.5	506	372	0.0025649	2.59093	-2.59093	2720.5	0.00641083	chr11	66049750	66050229	66049750	FALSE	FALSE
chr11_66056209_66057324	0.0329368	0.0321311	-0.000805669	4861	-0.0921947	3684	506	372	0.0194573	1.71092	-1.71092	3684	0.0383011	chr11	66056209	66057324	66056209	FALSE	FALSE
chr11_66079092_66080920	0.234251	0.240567	0.00631595	10908	0.103139	10560.5	506	372	0.00894787	2.04828	2.04828	10560.5	0.0193885	chr11	66079092	66080920	66079092	FALSE	FALSE
chr11_66102024_66102279	0.953215	0.95963	0.00641489	10921	0.176718	11792	506	372	7.49942e-06	5.12497	5.12497	11792	3.09645e-05	chr11	66102024	66102279	66102024	FALSE	FALSE
chr11_66112251_66112803	0.0524969	0.0524853	-1.16378e-05	7625	-0.00690637	7847	506	372	0.861146	0.0649232	-0.0649232	7847	0.894422	chr11	66112251	66112803	66112251	FALSE	FALSE
chr11_66114497_66115525	0.0571573	0.0549238	-0.00223352	3377	-0.0845765	3986	506	372	0.0320683	1.49392	-1.49392	3986	0.0592269	chr11	66114497	66115525	66114497	FALSE	FALSE
chr11_66138806_66139729	0.044471	0.0431508	-0.00132012	4046	-0.0219729	7205.5	506	372	0.577668	0.238322	-0.238322	7205.5	0.656626	chr11	66138806	66139729	66138806	FALSE	FALSE
chr11_66188130_66189397	0.267565	0.139255	-0.12831	209	-0.378108	137.5	506	372	9.38433e-22	21.0276	-21.0276	137.5	4.7793e-20	chr11	66188130	66189397	66188130	FALSE	TRUE
chr11_66233899_66234964	0.0363908	0.0361446	-0.000246167	6720	-0.0244273	7081	506	372	0.535913	0.270906	-0.270906	7081	0.618927	chr11	66233899	66234964	66233899	FALSE	FALSE
chr11_6624552_6625073	0.0241253	0.0234833	-0.000641963	5269	-0.116059	2809	506	372	0.00326608	2.48597	-2.48597	2808	0.00796213	chr11	6624552	6625073	6624552	TRUE	FALSE
chr11_66247269_66248249	0.0259159	0.0260723	0.00015641	8200	-0.0152046	7513.5	506	372	0.700056	0.154867	-0.154867	7513.5	0.762904	chr11	66247269	66248249	66247269	FALSE	FALSE
chr11_66313169_66313822	0.025061	0.0246563	-0.000404716	6088	-0.0851768	3961	506	372	0.0308677	1.5105	-1.5105	3961	0.0573143	chr11	66313169	66313822	66313169	FALSE	FALSE
chr11_66314207_66314455	0.124197	0.188391	0.0641937	12883	0.200189	12120	506	372	3.89744e-07	6.40922	6.40922	12120	1.98865e-06	chr11	66314207	66314455	66314207	FALSE	FALSE
chr11_6632879_6633787	0.0418721	0.0422079	0.00033579	8624	0.0501084	9527	506	372	0.204112	0.690131	0.690131	9527	0.2825	chr11	6632879	6633787	6632879	TRUE	FALSE
chr11_66335575_66336151	0.0747357	0.0606767	-0.0140589	1982	-0.250967	750	506	372	2.00545e-10	9.69779	-9.69779	750	1.73485e-09	chr11	66335575	66336151	66335575	FALSE	TRUE
chr11_66360097_66360834	0.0681639	0.0777701	0.00960618	11225	0.221801	12398	506	372	1.89118e-08	7.72327	7.72327	12398	1.19495e-07	chr11	66360097	66360834	66360097	FALSE	FALSE
chr11_66383571_66385047	0.0365324	0.0368549	0.000322491	8601	0.0214735	8814	506	372	0.586347	0.231845	0.231845	8814	0.663873	chr11	66383571	66385047	66383571	FALSE	FALSE
chr11_66405742_66406691	0.050845	0.0503676	-0.000477485	5809	0.0145884	8606.5	506	372	0.711662	0.147726	0.147726	8606.5	0.772445	chr11	66405742	66406691	66405742	FALSE	FALSE
chr11_66444997_66445471	0.0348864	0.0341881	-0.000698283	5116	-0.105003	3199	506	372	0.00778389	2.1088	-2.1088	3198	0.017174	chr11	66444997	66445471	66444997	FALSE	FALSE
chr11_66458783_66459123	0.878145	0.871375	-0.0067699	2524	-0.0170269	7439	506	372	0.666155	0.176425	-0.176425	7439	0.733691	chr11	66458783	66459123	66458783	FALSE	TRUE
chr11_66494937_66496387	0.0396554	0.0522811	0.0126257	11441	0.177897	11810	506	372	6.51673e-06	5.18597	5.18597	11810	2.72056e-05	chr11	66494937	66496387	66494937	FALSE	FALSE
chr11_66511803_66512719	0.0223004	0.0221221	-0.0001783	7001	-0.0626886	5081	506	372	0.112109	0.950358	-0.950358	5081	0.171959	chr11	66511803	66512719	66511803	FALSE	FALSE
chr11_66610366_66611267	0.0287709	0.0279186	-0.000852317	4758.5	-0.0937991	3621	506	372	0.0174391	1.75848	-1.75848	3620	0.0347831	chr11	66610366	66611267	66610366	FALSE	FALSE
chr11_66623620_66626614	0.433676	0.452084	0.0184079	11767	0.221896	12399	506	372	1.86482e-08	7.72936	7.72936	12399	1.17885e-07	chr11	66623620	66626614	66623620	FALSE	FALSE
chr11_66725503_66726373	0.0326863	0.0315861	-0.00110016	4342	-0.145799	2035	506	372	0.000219617	3.65833	-3.65833	2035	0.000700202	chr11	66725503	66726373	66725503	FALSE	FALSE
chr11_66790543_66791440	0.0350581	0.0283491	-0.00670905	2526	-0.286588	490	506	372	3.76423e-13	12.4243	-12.4243	490	5.08923e-12	chr11	66790543	66791440	66790543	FALSE	TRUE
chr11_66824118_66824621	0.0472464	0.0607088	0.0134624	11497	0.185165	11926.5	506	372	2.69098e-06	5.57009	5.57009	11926.5	1.20154e-05	chr11	66824118	66824621	66824118	FALSE	FALSE
chr11_66885275_66887330	0.0892728	0.123654	0.034381	12358	0.205374	12186.5	506	372	1.9366e-07	6.71296	6.71296	12186.5	1.03533e-06	chr11	66885275	66887330	66885275	FALSE	TRUE
chr11_67033675_67034660	0.0295572	0.028977	-0.000580143	5459	-0.07223	4584	506	372	0.067157	1.17291	-1.17291	4584	0.111369	chr11	67033675	67034660	67033675	FALSE	FALSE
chr11_6704296_6704943	0.0373253	0.0362198	-0.00110551	4329	-0.142537	2106	506	372	0.000303103	3.51841	-3.51841	2106	0.000938115	chr11	6704296	6704943	6704296	TRUE	FALSE
chr11_67052394_67053110	0.839709	0.853798	0.0140887	11534	0.165126	11618.5	506	372	2.84937e-05	4.54525	4.54525	11619	0.00010666	chr11	67052394	67053110	67052394	FALSE	FALSE
chr11_67055931_67057249	0.0340148	0.0342753	0.000260461	8468	0.0256067	8929	506	372	0.516404	0.28701	0.28701	8929	0.600956	chr11	67055931	67057249	67055931	FALSE	FALSE
chr11_67070807_67071801	0.0691334	0.0636535	-0.00547989	2661	0.0333312	9133.5	506	372	0.398287	0.399804	0.399804	9133	0.488554	chr11	67070807	67071801	67070807	FALSE	FALSE
chr11_67084688_67085813	0.0250184	0.0247986	-0.000219885	6820	-0.0807674	4157	506	372	0.040657	1.39086	-1.39086	4157	0.0726527	chr11	67084688	67085813	67084688	FALSE	FALSE
chr11_67120856_67121228	0.0352704	0.0349994	-0.000270978	6625	-0.0332993	6630	506	372	0.398738	0.399312	-0.399312	6630	0.488931	chr11	67120856	67121228	67120856	FALSE	FALSE
chr11_67139887_67141146	0.0492077	0.0533853	0.00417762	10585	0.129564	11038	506	372	0.00102414	2.98964	2.98964	11038	0.0028165	chr11	67139887	67141146	67139887	FALSE	FALSE
chr11_67159170_67159971	0.0215025	0.0212276	-0.000274906	6614	-0.0652493	4947.5	506	372	0.0981912	1.00793	-1.00793	4947.5	0.153798	chr11	67159170	67159971	67159170	FALSE	FALSE
chr11_67182965_67183393	0.0287652	0.0299512	0.00118602	9563	0.0821114	10157	506	372	0.0374267	1.42682	1.42682	10157	0.0677834	chr11	67182965	67183393	67182965	FALSE	FALSE
chr11_67188087_67188879	0.0288261	0.0311274	0.00230137	10065	0.237175	12599	506	372	1.83972e-09	8.73525	8.73525	12599	1.37999e-08	chr11	67188087	67188879	67188087	FALSE	FALSE
chr11_67195800_67196190	0.0376426	0.0379609	0.000318244	8590	0.00420757	8258	506	372	0.915177	0.0384951	0.0384951	8258	0.935973	chr11	67195800	67196190	67195800	FALSE	FALSE
chr11_67236264_67236953	0.0399174	0.0401879	0.000270501	8497	0.0088189	8411	506	372	0.823231	0.0844782	0.0844782	8411	0.863048	chr11	67236264	67236953	67236264	FALSE	FALSE
chr11_67250344_67250864	0.044921	0.0426101	-0.00231088	3352	-0.169047	1640	506	372	1.83103e-05	4.7373	-4.7373	1640	7.05689e-05	chr11	67250344	67250864	67250344	FALSE	FALSE
chr11_67260413_67262715	0.900159	0.904058	0.00389886	10530	0.112229	10739	506	372	0.00444906	2.35173	2.35173	10739	0.0105094	chr11	67260413	67262715	67260413	FALSE	TRUE
chr11_67275067_67276431	0.05975	0.0585634	-0.00118661	4210	-0.0354137	6516	506	372	0.369469	0.432423	-0.432423	6516	0.460163	chr11	67275067	67276431	67275067	FALSE	FALSE
chr11_67287234_67287568	0.882733	0.863425	-0.0193082	1724	-0.130435	2401	506	372	0.000946746	3.02377	-3.02377	2400	0.0026255	chr11	67287234	67287568	67287234	FALSE	TRUE
chr11_67350928_67351953	0.0769984	0.0740243	-0.00297412	3115	-0.00219941	8029	506	372	0.955651	0.0197008	-0.0197008	8029	0.966712	chr11	67350928	67351953	67350928	FALSE	TRUE
chr11_67374150_67374726	0.0304982	0.0295715	-0.000926765	4632	-0.0930873	3653	506	372	0.0183107	1.73729	-1.73729	3652	0.036276	chr11	67374150	67374726	67374150	FALSE	FALSE
chr11_67383537_67383809	0.499725	0.493919	-0.00580573	2623	-0.0524672	5652.5	506	372	0.183614	0.736094	-0.736094	5652.5	0.258272	chr11	67383537	67383809	67383537	FALSE	FALSE
chr11_67396844_67398294	0.0349876	0.0352891	0.000301544	8554	0.0282842	8992	506	372	0.47352	0.324662	0.324662	8992	0.560487	chr11	67396844	67398294	67396844	FALSE	FALSE
chr11_67572486_67573851	0.0219658	0.0230611	0.00109535	9494	0.207977	12220	506	372	1.35459e-07	6.86819	6.86819	12220	7.43542e-07	chr11	67572486	67573851	67432665	FALSE	FALSE
chr11_67764918_67765256	0.909076	0.917654	0.00857854	11130.5	0.197257	12082.5	506	372	5.74581e-07	6.24065	6.24065	12082.5	2.85436e-06	chr11	67764918	67765256	67241260	FALSE	TRUE
chr11_67797802_67798413	0.0325686	0.0320346	-0.000534039	5616	-0.113041	2908	506	372	0.00416964	2.3799	-2.3799	2907	0.00990463	chr11	67797802	67798413	67208103	FALSE	FALSE
chr11_67806251_67806611	0.0412981	0.0445534	0.00325523	10368	0.182721	11893	506	372	3.63628e-06	5.43934	5.43934	11893	1.58701e-05	chr11	67806251	67806611	67199905	FALSE	FALSE
chr11_67887977_67889768	0.0608694	0.0652464	0.00437699	10612	0.210889	12262	506	372	9.03706e-08	7.04397	7.04397	12262	5.10317e-07	chr11	67887977	67889768	67116748	FALSE	FALSE
chr11_67980011_67982068	0.0339356	0.0330919	-0.000843726	4783	-0.10724	3089.5	506	372	0.00656794	2.18257	-2.18257	3088.5	0.0148739	chr11	67980011	67982068	67024448	FALSE	FALSE
chr11_68039300_68039880	0.0448468	0.0449781	0.000131227	8119	-0.0218241	7214	506	372	0.580247	0.236387	-0.236387	7214	0.658728	chr11	68039300	68039880	66966636	FALSE	FALSE
chr11_68227860_68228608	0.0239759	0.0234339	-0.000541963	5595	-0.0767882	4341	506	372	0.0516361	1.28705	-1.28705	4341	0.0891783	chr11	68227860	68228608	66777908	FALSE	FALSE
chr11_68451359_68452846	0.185677	0.19916	0.0134836	11498	0.0770751	10053	506	372	0.0507691	1.2944	1.2944	10053	0.0879162	chr11	68451359	68452846	66553670	FALSE	TRUE
chr11_68518754_68518968	0.0223634	0.0249208	0.00255737	10165	0.218188	12347.5	506	372	3.20034e-08	7.4948	7.4948	12347.5	1.94679e-07	chr11	68518754	68518968	66487548	FALSE	FALSE
chr11_68611250_68611807	0.163394	0.275538	0.112144	13264	0.221907	12400	506	372	1.86191e-08	7.73004	7.73004	12400	1.17756e-07	chr11	68611250	68611807	66394709	FALSE	FALSE
chr11_68671107_68671982	0.039612	0.0398143	0.000202317	8327	-0.00960517	7756	506	372	0.807758	0.0927189	-0.0927189	7756	0.849918	chr11	68671107	68671982	66334534	FALSE	FALSE
chr11_68816341_68816951	0.0471233	0.0482046	0.00108127	9483	0.100652	10517	506	372	0.0107408	1.96896	1.96896	10517	0.0227744	chr11	68816341	68816951	66189565	FALSE	FALSE
chr11_68849897_68850551	0.795776	0.795763	-1.2517e-05	7622	-0.00372944	7977.5	506	372	0.924797	0.0339534	-0.0339534	7977.5	0.943391	chr11	68849897	68850551	66155965	FALSE	FALSE
chr11_69258149_69258544	0.0523914	0.0464182	-0.0059732	2603	-0.120691	2670	506	372	0.00222124	2.6534	-2.6534	2669	0.00563189	chr11	69258149	69258544	65747972	FALSE	FALSE
chr11_69285724_69286479	0.764345	0.739966	-0.0243788	1525	-0.0743657	4467	506	372	0.0594632	1.22575	-1.22575	4466.5	0.100455	chr11	69285724	69286479	65720037	FALSE	FALSE
chr11_69451136_69458596	0.0823938	0.0807076	-0.00168628	3685	-0.0686068	4776.5	506	372	0.0820721	1.0858	-1.0858	4776.5	0.131984	chr11	69451136	69458596	65547920	FALSE	TRUE
chr11_69468810_69469152	0.820826	0.856683	0.0358576	12398	0.192937	12027	506	372	1.00786e-06	5.9966	5.9966	12027	4.81436e-06	chr11	69468810	69469152	65537364	FALSE	FALSE
chr11_6947520_6948212	0.0838681	0.0913068	0.0074387	11017	0.018796	8737	506	372	0.633881	0.197992	0.197992	8737	0.705023	chr11	6947520	6948212	6947520	TRUE	TRUE
chr11_694761_696375	0.02784	0.0261201	-0.00171991	3660	-0.186175	1395	506	372	2.37377e-06	5.62456	-5.62456	1395	1.07085e-05	chr11	694761	696375	694761	TRUE	FALSE
chr11_69489754_69490329	0.0326314	0.032284	-0.000347409	6320	-0.0742063	4483.5	506	372	0.0600109	1.22177	-1.22177	4483.5	0.101178	chr11	69489754	69490329	65516187	FALSE	FALSE
chr11_69517840_69519929	0.151514	0.125749	-0.0257655	1471	-0.0933369	3637	506	372	0.0180008	1.74471	-1.74471	3636	0.0357823	chr11	69517840	69519929	65486587	FALSE	TRUE
chr11_69588826_69590546	0.149553	0.100404	-0.0491487	909	-0.248603	767	506	372	2.95727e-10	9.52911	-9.52911	767	2.50076e-09	chr11	69588826	69590546	65415970	FALSE	TRUE
chr11_69632033_69634710	0.130481	0.0978362	-0.0326451	1243	-0.174126	1560	506	372	1.01813e-05	4.9922	-4.9922	1560	4.11719e-05	chr11	69632033	69634710	65371806	FALSE	TRUE
chr11_69706778_69707017	0.498531	0.512816	0.0142845	11545	0.0960304	10425	506	372	0.0149383	1.8257	1.8257	10425	0.030372	chr11	69706778	69707017	65299499	FALSE	FALSE
chr11_69924338_69925197	0.077645	0.083856	0.00621098	10893	0.0516384	9558	506	372	0.190635	0.719797	0.719797	9559	0.266791	chr11	69924338	69925197	65081319	FALSE	TRUE
chr11_69933919_69934209	0.783837	0.800018	0.0161812	11658	0.0430639	9369.5	506	372	0.27511	0.560494	0.560494	9370.5	0.361695	chr11	69933919	69934209	65072307	FALSE	FALSE
chr11_70049099_70049806	0.0386166	0.0385708	-4.57838e-05	7492	-0.0235454	7124	506	372	0.55074	0.259054	-0.259054	7124	0.632599	chr11	70049099	70049806	64956710	FALSE	FALSE
chr11_70116237_70117497	0.0336044	0.0334443	-0.000160076	7074	-0.0330231	6640	506	372	0.402663	0.395058	-0.395058	6640.5	0.49294	chr11	70116237	70117497	64889019	FALSE	FALSE
chr11_70244288_70245001	0.0175995	0.0174202	-0.000179358	6997	-0.0341918	6588	506	372	0.386217	0.413169	-0.413169	6588	0.476466	chr11	70244288	70245001	64761515	FALSE	FALSE
chr11_70332266_70333413	0.876318	0.885122	0.0088042	11160	0.079572	10098	506	372	0.0437254	1.35927	1.35927	10098	0.07733	chr11	70332266	70333413	64673103	FALSE	FALSE
chr11_7041072_7041949	0.0849912	0.0712061	-0.0137851	1993	-0.100971	3347	506	372	0.0104943	1.97904	-1.97904	3345	0.0223392	chr11	7041072	7041949	7041072	TRUE	FALSE
chr11_70563664_70563886	0.832421	0.655347	-0.177074	97	-0.311722	383	506	372	2.77059e-15	14.5574	-14.5574	383	5.038e-14	chr11	70563664	70563886	64442630	FALSE	TRUE
chr11_70666428_70666779	0.910938	0.908947	-0.0019908	3505	-0.0730163	4543	506	372	0.0642342	1.19223	-1.19223	4543	0.107231	chr11	70666428	70666779	64339737	FALSE	FALSE
chr11_70672834_70673055	0.446718	0.111961	-0.334757	8	-0.345499	238	506	372	2.00591e-18	17.6977	-17.6977	238	5.95922e-17	chr11	70672834	70673055	64333461	FALSE	FALSE
chr11_70962173_70964161	0.078427	0.137238	0.0588106	12831	0.233393	12556	506	372	3.30894e-09	8.48031	8.48031	12556	2.368e-08	chr11	70962173	70964161	64042355	FALSE	FALSE
chr11_71146442_71146862	0.881738	0.887405	0.00566733	10832	0.18745	11956.5	506	372	2.02414e-06	5.69376	5.69376	11957	9.20786e-06	chr11	71146442	71146862	63859654	FALSE	FALSE
chr11_71159014_71159831	0.0314942	0.0312313	-0.000262851	6657	-0.0190297	7361	506	372	0.629667	0.200889	-0.200889	7361	0.701084	chr11	71159014	71159831	63846685	FALSE	FALSE
chr11_71164097_71164680	0.0283058	0.0280596	-0.000246139	6721	-0.0355466	6509	506	372	0.367676	0.434535	-0.434535	6509	0.458351	chr11	71164097	71164680	63841836	FALSE	FALSE
chr11_71497571_71499065	0.0710884	0.0741442	0.00305578	10306	0.172059	11722	506	372	1.29525e-05	4.88765	4.88765	11722	5.12612e-05	chr11	71497571	71499065	63507451	FALSE	FALSE
chr11_71791385_71791960	0.0324299	0.0319648	-0.000465151	5859	-0.0517872	5688.5	506	372	0.189361	0.722711	-0.722711	5688.5	0.265144	chr11	71791385	71791960	63214556	FALSE	FALSE
chr11_71814203_71814529	0.0683627	0.0673354	-0.00102732	4442	-0.0976455	3474.5	506	372	0.0133308	1.87514	-1.87514	3472.5	0.0275252	chr11	71814203	71814529	63191987	FALSE	FALSE
chr11_71823668_71823975	0.0387478	0.0368048	-0.00194303	3526	-0.0878172	3826.5	506	372	0.0260345	1.58445	-1.58445	3825.5	0.0495977	chr11	71823668	71823975	63182541	FALSE	FALSE
chr11_71934247_71936321	0.0483948	0.0505635	0.00216869	10026	0.198999	12108	506	372	4.56526e-07	6.34053	6.34053	12108	2.30681e-06	chr11	71934247	71936321	63070195	FALSE	FALSE
chr11_71954816_71955659	0.289418	0.158905	-0.130513	200	-0.272674	581	506	372	4.80843e-12	11.318	-11.318	581	5.41928e-11	chr11	71954816	71955659	63050857	FALSE	TRUE
chr11_72145155_72145636	0.0331152	0.0327391	-0.000376068	6195	-0.0478133	5883	506	372	0.225607	0.646647	-0.646647	5883	0.307228	chr11	72145155	72145636	62860880	FALSE	FALSE
chr11_72353222_72354358	0.0456329	0.0456414	8.47131e-06	7713	-0.0116665	7666	506	372	0.767562	0.114887	-0.114887	7666	0.818688	chr11	72353222	72354358	62652158	FALSE	FALSE
chr11_72463092_72463717	0.05155	0.0544703	0.00292033	10274	0.170524	11699	506	372	1.54627e-05	4.81071	4.81071	11699	6.04192e-05	chr11	72463092	72463717	62542799	FALSE	FALSE
chr11_72504665_72505127	0.0275654	0.0273137	-0.000251733	6701	-0.0726444	4562.5	506	372	0.0656032	1.18307	-1.18307	4562.5	0.10918	chr11	72504665	72505127	62501389	FALSE	FALSE
chr11_72525005_72526098	0.0315906	0.0309759	-0.000614639	5352	-0.0991649	3414	506	372	0.0119601	1.92226	-1.92226	3412	0.0250192	chr11	72525005	72526098	62480418	FALSE	FALSE
chr11_72532612_72533774	0.345812	0.294124	-0.0516876	865	-0.179066	1498	506	372	5.66517e-06	5.24679	-5.24679	1498	2.38564e-05	chr11	72532612	72533774	62472742	FALSE	FALSE
chr11_7272757_7274235	0.114763	0.102004	-0.0127597	2043	-0.134749	2296	506	372	0.000637279	3.19567	-3.19567	2294	0.0018396	chr11	7272757	7274235	7272757	TRUE	TRUE
chr11_72852176_72854160	0.0316248	0.031468	-0.000156835	7091	-0.0355306	6510	506	372	0.367891	0.434281	-0.434281	6510	0.458535	chr11	72852176	72854160	62152356	FALSE	FALSE
chr11_72928982_72929885	0.0852535	0.137249	0.051996	12744	0.290854	13057	506	372	1.68206e-13	12.7742	12.7742	13057	2.3761e-12	chr11	72928982	72929885	62076631	FALSE	FALSE
chr11_73018452_73020563	0.0514871	0.0640869	0.0125998	11439	0.161322	11559	506	372	4.33665e-05	4.36285	4.36285	11559	0.000157292	chr11	73018452	73020563	61985953	FALSE	FALSE
chr11_73073118_73073733	0.859626	0.87506	0.015434	11617	0.121127	10886	506	372	0.00214075	2.66943	2.66943	10886	0.00544921	chr11	73073118	73073733	61932783	FALSE	FALSE
chr11_73087229_73088294	0.0291285	0.0295877	0.000459209	8841	0.0792958	10092	506	372	0.0444617	1.35201	1.35201	10092	0.0784172	chr11	73087229	73088294	61918222	FALSE	FALSE
chr11_73308799_73309500	0.0297032	0.0293569	-0.000346316	6324	-0.0753219	4411.5	506	372	0.0562633	1.24977	-1.24977	4411.5	0.0959103	chr11	73308799	73309500	61697016	FALSE	FALSE
chr11_734674_736521	0.853126	0.869365	0.0162384	11660	0.108855	10686	506	372	0.00579915	2.23664	2.23664	10686	0.0133177	chr11	734674	736521	734674	TRUE	TRUE
chr11_73471275_73472483	0.0358796	0.0340098	-0.00186978	3562	-0.195323	1280	506	372	7.40015e-07	6.13076	-6.13076	1280	3.61652e-06	chr11	73471275	73472483	61534033	FALSE	FALSE
chr11_73587673_73588102	0.0312762	0.0319568	0.000680678	9129	0.0184028	8729	506	372	0.640996	0.193145	0.193145	8729	0.71171	chr11	73587673	73588102	61418414	FALSE	FALSE
chr11_73693702_73694802	0.0819614	0.111888	0.0299262	12221	0.305251	13148	506	372	1.01935e-14	13.9917	13.9917	13148	1.72399e-13	chr11	73693702	73694802	61311714	FALSE	FALSE
chr11_73881899_73882572	0.0340752	0.0337911	-0.000284176	6569	-0.0519784	5680.5	506	372	0.187731	0.726464	-0.726464	5680.5	0.263107	chr11	73881899	73882572	61123944	FALSE	FALSE
chr11_74108894_74109937	0.0391436	0.0383845	-0.000759121	4978	-0.0794658	4213.5	506	372	0.0440073	1.35647	-1.35647	4213.5	0.0777677	chr11	74108894	74109937	60896579	FALSE	FALSE
chr11_74178175_74178801	0.227561	0.434375	0.206814	13467	0.251721	12741	506	372	1.77037e-10	9.75194	9.75194	12741	1.5473e-09	chr11	74178175	74178801	60827715	FALSE	TRUE
chr11_74204135_74204856	0.0417699	0.0416565	-0.000113428	7245	-0.0300427	6812	506	372	0.446458	0.35022	-0.35022	6812	0.534479	chr11	74204135	74204856	60801660	FALSE	FALSE
chr11_74303529_74304040	0.0372027	0.0372045	1.75834e-06	7678	-0.0229504	7153	506	372	0.560856	0.251149	-0.251149	7153	0.64177	chr11	74303529	74304040	60702476	FALSE	FALSE
chr11_74659931_74660373	0.0241059	0.024348	0.000242101	8426	-0.00211441	8031.5	506	372	0.957367	0.0189214	-0.0189214	8032	0.967725	chr11	74659931	74660373	60346143	FALSE	FALSE
chr11_746877_748032	0.0431916	0.0422401	-0.000951551	4573	-0.151016	1919	506	372	0.000129429	3.88797	-3.88797	1919	0.000432933	chr11	746877	748032	746877	TRUE	FALSE
chr11_74699815_74700186	0.0406971	0.0414834	0.000786353	9264	0.0914297	10332	506	372	0.0204895	1.68847	1.68847	10332	0.0400362	chr11	74699815	74700186	60306330	FALSE	FALSE
chr11_75110493_75110924	0.0414118	0.0409919	-0.000419851	6030	-0.0503421	5751	506	372	0.20201	0.694628	-0.694628	5751	0.280162	chr11	75110493	75110924	59895592	FALSE	FALSE
chr11_75140737_75141849	0.156115	0.333302	0.177187	13432	0.428779	13498	506	372	1.6412e-27	26.7848	26.7848	13498	2.24579e-25	chr11	75140737	75141849	59864667	FALSE	TRUE
chr11_75236189_75237781	0.224225	0.235416	0.0111912	11334	0.0857984	10227	506	372	0.0296655	1.52775	1.52775	10227	0.0554774	chr11	75236189	75237781	59768735	FALSE	FALSE
chr11_75272950_75273616	0.0735568	0.0754599	0.00190304	9936	0.0722194	9962	506	372	0.0671972	1.17265	1.17265	9962	0.111395	chr11	75272950	75273616	59732900	FALSE	FALSE
chr11_7534554_7535727	0.0437396	0.045494	0.00175445	9866	0.123454	10929	506	372	0.00175428	2.7559	2.7559	10929	0.00456498	chr11	7534554	7535727	7534554	TRUE	FALSE
chr11_75378416_75379882	0.0809066	0.0599003	-0.0210063	1650	-0.208785	1134	506	372	1.21138e-07	6.91672	-6.91672	1134	6.69274e-07	chr11	75378416	75379882	59626634	FALSE	FALSE
chr11_75479462_75480172	0.0371098	0.0376687	0.000558939	8983	0.0550597	9624	506	372	0.162889	0.788108	0.788108	9624	0.233558	chr11	75479462	75480172	59526344	FALSE	FALSE
chr11_75917271_75917926	0.0925305	0.127008	0.0344778	12362	0.110799	10724	506	372	0.00498177	2.30262	2.30262	10724	0.0116539	chr11	75917271	75917926	59088590	FALSE	FALSE
chr11_75918741_75922084	0.0422703	0.0433869	0.00111664	9519	0.0631242	9806	506	372	0.109637	0.960041	0.960041	9807	0.168722	chr11	75918741	75922084	59084432	FALSE	FALSE
chr11_75945903_75947583	0.0442957	0.0421504	-0.00214526	3420	-0.0902078	3746	506	372	0.0222372	1.65292	-1.65292	3745	0.0431463	chr11	75945903	75947583	59058933	FALSE	FALSE
chr11_76091524_76092638	0.0759531	0.070894	-0.00505913	2716	-0.175061	1548	506	372	9.12272e-06	5.03988	-5.03988	1548	3.72021e-05	chr11	76091524	76092638	58913878	FALSE	FALSE
chr11_76155407_76156827	0.0343376	0.0345925	0.000254877	8457	-0.0103914	7723.5	506	372	0.792359	0.101078	-0.101078	7723.5	0.837684	chr11	76155407	76156827	58849689	FALSE	FALSE
chr11_76381449_76382295	0.0687154	0.0802061	0.0114907	11359	0.0146946	8615	506	372	0.709656	0.148952	0.148952	8615	0.77138	chr11	76381449	76382295	58624221	FALSE	TRUE
chr11_76494416_76495672	0.0528605	0.0440225	-0.00883799	2335	-0.197118	1263	506	372	5.85105e-07	6.23277	-6.23277	1263	2.90239e-06	chr11	76494416	76495672	58510844	FALSE	FALSE
chr11_76757052_76757358	0.0624715	0.0690609	0.00658938	10940	0.164074	11601	506	372	3.20314e-05	4.49442	4.49442	11601	0.000118917	chr11	76757052	76757358	58249158	FALSE	FALSE
chr11_76777569_76778453	0.0218536	0.0215525	-0.000301041	6502	-0.0977305	3471	506	372	0.0132506	1.87776	-1.87776	3469	0.0273846	chr11	76777569	76778453	58228063	FALSE	FALSE
chr11_7694711_7695685	0.120492	0.399838	0.279347	13512	0.389594	13445	506	372	5.36538e-23	22.2704	22.2704	13445	3.38069e-21	chr11	7694711	7695685	7694711	TRUE	TRUE
chr11_77122736_77123088	0.0619147	0.0855778	0.0236631	11999	0.150931	11415	506	372	0.000130567	3.88417	3.88417	11415	0.000436414	chr11	77122736	77123088	57883428	FALSE	FALSE
chr11_77184193_77185504	0.0373043	0.0384164	0.00111214	9513	0.124357	10946	506	372	0.00162241	2.78984	2.78984	10946	0.00425863	chr11	77184193	77185504	57821012	FALSE	FALSE
chr11_77300360_77301391	0.0399288	0.0405306	0.00060185	9052	0.0240342	8888	506	372	0.542498	0.265602	0.265602	8888	0.624877	chr11	77300360	77301391	57705125	FALSE	FALSE
chr11_77348423_77348959	0.0272168	0.0268321	-0.000384655	6159	-0.116027	2813	506	372	0.00327461	2.48484	-2.48484	2812	0.00797575	chr11	77348423	77348959	57657557	FALSE	FALSE
chr11_77524642_77524844	0.900412	0.903683	0.00327057	10374	0.104169	10582	506	372	0.00828664	2.08162	2.08162	10582	0.0181326	chr11	77524642	77524844	57481672	FALSE	FALSE
chr11_77531186_77532262	0.044982	0.0435344	-0.00144763	3919	-0.13308	2334	506	372	0.000743676	3.12862	-3.12862	2332	0.00211207	chr11	77531186	77532262	57474254	FALSE	FALSE
chr11_776803_777998	0.0366609	0.036474	-0.000186838	6966	-0.0482383	5852	506	372	0.221509	0.654608	-0.654608	5852	0.302804	chr11	776803	777998	776803	TRUE	FALSE
chr11_77705600_77706035	0.0252557	0.0249318	-0.000323901	6410	-0.0872434	3848	506	372	0.0270251	1.56823	-1.56823	3847	0.0512687	chr11	77705600	77706035	57300481	FALSE	FALSE
chr11_77790478_77791101	0.0329788	0.0323038	-0.000675041	5179	-0.066503	4890	506	372	0.0918989	1.03669	-1.03669	4890	0.145337	chr11	77790478	77791101	57215415	FALSE	FALSE
chr11_77850482_77850845	0.0323488	0.0320967	-0.000252098	6700	-0.0396479	6308.5	506	372	0.314999	0.501691	-0.501691	6308.5	0.403908	chr11	77850482	77850845	57155671	FALSE	FALSE
chr11_77899564_77899990	0.0342795	0.0340084	-0.000271153	6624	-0.0402482	6279	506	372	0.307726	0.511835	-0.511835	6279	0.396195	chr11	77899564	77899990	57106526	FALSE	FALSE
chr11_78127965_78129400	0.07358	0.0757714	0.00219137	10037	0.128777	11017	506	372	0.00109898	2.95901	2.95901	11017	0.00300279	chr11	78127965	78129400	56877116	FALSE	FALSE
chr11_78285405_78285995	0.0387902	0.0377888	-0.00100141	4480	-0.0805708	4162	506	372	0.0411487	1.38564	-1.38564	4162	0.0734151	chr11	78285405	78285995	56720521	FALSE	FALSE
chr11_78780676_78781048	0.932251	0.954295	0.0220435	11926	0.255185	12791	506	372	9.94146e-11	10.0025	10.0025	12791	9.14304e-10	chr11	78780676	78781048	56225468	FALSE	TRUE
chr11_79148358_79152200	0.0831645	0.0652526	-0.0179119	1788	-0.300693	425	506	372	2.51162e-14	13.6	-13.6	425	4.00293e-13	chr11	79148358	79152200	55854316	FALSE	TRUE
chr11_797640_798544	0.0287042	0.0286892	-1.50427e-05	7613	-0.0211654	7244.5	506	372	0.591732	0.227875	-0.227875	7244.5	0.66863	chr11	797640	798544	797640	TRUE	FALSE
chr11_8040409_8041558	0.0824325	0.0660128	-0.0164196	1856	-0.193304	1307	506	372	9.61356e-07	6.01712	-6.01712	1307	4.61335e-06	chr11	8040409	8041558	8040409	TRUE	TRUE
chr11_809202_810509	0.0434457	0.042448	-0.000997692	4484	-0.104509	3215	506	372	0.00807829	2.09268	-2.09268	3214	0.017734	chr11	809202	810509	809202	TRUE	FALSE
chr11_818974_820271	0.0282082	0.0288679	0.000659626	9107	0.0541672	9612	506	372	0.169815	0.770024	0.770024	9612	0.241902	chr11	818974	820271	818974	TRUE	FALSE
chr11_8190226_8190671	0.116387	0.0487955	-0.0675912	616	-0.293106	458	506	372	1.09422e-13	12.9609	-12.9609	458	1.58539e-12	chr11	8190226	8190671	8190226	TRUE	TRUE
chr11_82443435_82444976	0.24609	0.122872	-0.123218	226	-0.249235	762	506	372	2.66645e-10	9.57407	-9.57407	762	2.26472e-09	chr11	82443435	82444976	52561540	FALSE	TRUE
chr11_82612259_82612844	0.0384476	0.0381091	-0.000338562	6349	-0.0799864	4188	506	372	0.0426402	1.37018	-1.37018	4188	0.0757272	chr11	82612259	82612844	52393672	FALSE	FALSE
chr11_826941_827625	0.0669092	0.151015	0.0841056	13070	0.447384	13515	506	372	8.37612e-30	29.077	29.077	13515	1.64451e-27	chr11	826941	827625	826941	TRUE	FALSE
chr11_8284102_8285032	0.105414	0.0804228	-0.0249915	1497	-0.263696	647	506	372	2.33215e-11	10.6322	-10.6322	647	2.35598e-10	chr11	8284102	8285032	8284102	TRUE	TRUE
chr11_82867960_82868560	0.024151	0.0237803	-0.00037067	6217	-0.0635386	5040	506	372	0.107326	0.969294	-0.969294	5040	0.165749	chr11	82867960	82868560	52137956	FALSE	FALSE
chr11_8289532_8290322	0.0555205	0.0464889	-0.00903162	2323	-0.106709	3108	506	372	0.00684017	2.16493	-2.16493	3107	0.0154183	chr11	8289532	8290322	8289532	TRUE	TRUE
chr11_82904478_82905660	0.0415016	0.0402964	-0.00120513	4190	-0.112404	2920.5	506	372	0.0043874	2.35779	-2.35779	2920	0.01038	chr11	82904478	82905660	52100856	FALSE	FALSE
chr11_829284_833558	0.315573	0.354915	0.0393421	12493	0.134472	11145	506	372	0.00065386	3.18452	3.18452	11145	0.00188344	chr11	829284	833558	829284	TRUE	FALSE
chr11_82996642_82997536	0.0542545	0.0533174	-0.000937089	4610	-0.0256917	7013.5	506	372	0.515013	0.288182	-0.288182	7013.5	0.599955	chr11	82996642	82997536	52008980	FALSE	FALSE
chr11_842293_843396	0.0358965	0.0323396	-0.00355683	2967	-0.241054	817	506	372	9.98444e-10	9.00068	-9.00068	817	7.86848e-09	chr11	842293	843396	842293	TRUE	FALSE
chr11_85339343_85339629	0.0319374	0.0322951	0.000357661	8671	-0.0205279	7271.5	506	372	0.602946	0.219722	-0.219722	7271.5	0.678809	chr11	85339343	85339629	49666887	FALSE	FALSE
chr11_85358865_85359226	0.03042	0.0299174	-0.000502564	5735.5	-0.0777339	4295.5	506	372	0.0488242	1.31136	-1.31136	4295	0.0850156	chr11	85358865	85359226	49647290	FALSE	FALSE
chr11_85374872_85376234	0.0411289	0.040617	-0.0005119	5698	-0.0742382	4480.5	506	372	0.0599011	1.22257	-1.22257	4480.5	0.101031	chr11	85374872	85376234	49630282	FALSE	FALSE
chr11_85565908_85566451	0.0692924	0.0649621	-0.00433035	2833	-0.00372944	7977.5	506	372	0.924797	0.0339534	-0.0339534	7977.5	0.943391	chr11	85565908	85566451	49440065	FALSE	FALSE
chr11_85779725_85780397	0.0278925	0.0276327	-0.000259815	6670	-0.0281036	6897	506	372	0.47635	0.322074	-0.322074	6897	0.563197	chr11	85779725	85780397	49226119	FALSE	FALSE
chr11_85955385_85955590	0.0622608	0.0601728	-0.002088	3448	-0.0416401	6211.5	506	372	0.291296	0.535666	-0.535666	6211.5	0.378712	chr11	85955385	85955590	49050926	FALSE	FALSE
chr11_8615397_8615889	0.0443507	0.03828	-0.00607067	2592	-0.0630445	5067	506	372	0.110086	0.958267	-0.958267	5067	0.169317	chr11	8615397	8615889	8615397	TRUE	FALSE
chr11_86382695_86383586	0.0523248	0.0426231	-0.00970172	2268	-0.112191	2927	506	372	0.00446224	2.35045	-2.35045	2927	0.0105387	chr11	86382695	86383586	48622930	FALSE	FALSE
chr11_86511184_86511889	0.0586958	0.0668173	0.00812157	11084	0.151441	11431	506	372	0.000123882	3.90699	3.90699	11431	0.000416641	chr11	86511184	86511889	48494627	FALSE	FALSE
chr11_86665901_86666567	0.0298537	0.0284627	-0.00139102	3989	-0.15737	1807.5	506	372	6.64677e-05	4.17739	-4.17739	1807.5	0.000234002	chr11	86665901	86666567	48339949	FALSE	FALSE
chr11_86748660_86749093	0.0334004	0.0322743	-0.00112606	4298	-0.0781907	4273	506	372	0.0475124	1.32319	-1.32319	4273	0.083041	chr11	86748660	86749093	48257423	FALSE	FALSE
chr11_8703783_8704616	0.0319885	0.0318166	-0.000171885	7031	-0.0516065	5692.5	506	372	0.190909	0.719174	-0.719174	5692.5	0.267036	chr11	8703783	8704616	8703783	TRUE	FALSE
chr11_88070501_88071042	0.0613207	0.0633681	0.00204744	9985	0.162114	11573	506	372	3.97662e-05	4.40049	4.40049	11573	0.000145245	chr11	88070501	88071042	46935474	FALSE	FALSE
chr11_88241710_88242562	0.36223	0.456937	0.0947068	13160	0.219283	12359	506	372	2.73124e-08	7.56364	7.56364	12359	1.67801e-07	chr11	88241710	88242562	46763954	FALSE	TRUE
chr11_8892072_8892794	0.0544334	0.0488178	-0.0056156	2642	-0.203042	1189	506	372	2.65803e-07	6.57544	-6.57544	1189	1.39459e-06	chr11	8892072	8892794	8892072	TRUE	FALSE
chr11_8932573_8933294	0.0534709	0.0527861	-0.000684828	5149	-0.0506396	5740	506	372	0.199356	0.70037	-0.70037	5740	0.276907	chr11	8932573	8933294	8932573	TRUE	FALSE
chr11_8985452_8986507	0.0381673	0.0379437	-0.000223599	6809	-0.0334003	6623	506	372	0.39731	0.400871	-0.400871	6623	0.487757	chr11	8985452	8986507	8985452	TRUE	FALSE
chr11_9025095_9026315	0.230976	0.315131	0.0841547	13071	0.285286	13027	506	372	4.80198e-13	12.3186	12.3186	13027	6.4091e-12	chr11	9025095	9026315	9025095	TRUE	FALSE
chr11_910677_911581	0.0349324	0.0326537	-0.00227872	3364	-0.153353	1873	506	372	0.000101579	3.9932	-3.9932	1873	0.000346796	chr11	910677	911581	910677	TRUE	FALSE
chr11_9112461_9113459	0.149229	0.144122	-0.00510766	2707	0.0132071	8561.5	506	372	0.737915	0.131994	0.131994	8561.5	0.794448	chr11	9112461	9113459	9112461	TRUE	TRUE
chr11_91957635_91960290	0.113886	0.0673011	-0.0465846	953	-0.380222	131	506	372	5.5764e-22	21.2536	-21.2536	131	2.96249e-20	chr11	91957635	91960290	43046226	FALSE	TRUE
chr11_92615835_92616668	0.918912	0.929272	0.0103601	11272	0.0767351	10045	506	372	0.051798	1.28569	1.28569	10045	0.0894351	chr11	92615835	92616668	42389848	FALSE	TRUE
chr11_9286273_9287091	0.0674281	0.0649758	-0.00245236	3302	-0.065993	4913	506	372	0.0944183	1.02494	-1.02494	4913	0.148783	chr11	9286273	9287091	9286273	TRUE	FALSE
chr11_92930760_92931391	0.0392883	0.0395374	0.000249013	8440	0.00752263	8375.5	506	372	0.84889	0.0711488	0.0711488	8375.5	0.884132	chr11	92930760	92931391	42075125	FALSE	FALSE
chr11_93063598_93064076	0.164732	0.219947	0.0552144	12783	0.0791151	10088	506	372	0.0449488	1.34728	1.34728	10088	0.079132	chr11	93063598	93064076	41942440	FALSE	TRUE
chr11_93275814_93276721	0.0649903	0.067767	0.00277665	10226	0.214916	12313	506	372	5.11802e-08	7.2909	7.2909	12313	3.00537e-07	chr11	93275814	93276721	41729795	FALSE	FALSE
chr11_9335730_9336477	0.0315074	0.0317683	0.000260971	8471	-0.0340431	6593	506	372	0.388287	0.410847	-0.410847	6593	0.478715	chr11	9335730	9336477	9335730	TRUE	FALSE
chr11_93394678_93395273	0.0249428	0.0249514	8.58307e-06	7714	-0.0154703	7504	506	372	0.695074	0.157969	-0.157969	7504	0.758757	chr11	93394678	93395273	41611243	FALSE	FALSE
chr11_93474085_93475075	0.0453271	0.044088	-0.00123913	4147	-0.122158	2632	506	372	0.00196084	2.70756	-2.70756	2632	0.00503764	chr11	93474085	93475075	41531441	FALSE	FALSE
chr11_93517309_93518130	0.0291946	0.0289888	-0.000205785	6891	-0.0878278	3825	506	372	0.0260164	1.58475	-1.58475	3824	0.0495773	chr11	93517309	93518130	41488386	FALSE	FALSE
chr11_93583374_93583717	0.0869743	0.108537	0.0215622	11907	0.193602	12037	506	372	9.25136e-07	6.03379	6.03379	12037	4.45374e-06	chr11	93583374	93583717	41422799	FALSE	FALSE
chr11_93861560_93862773	0.0375387	0.037372	-0.000166681	7049	-0.0639955	5013.5	506	372	0.104823	0.979543	-0.979543	5014	0.162513	chr11	93861560	93862773	41143743	FALSE	FALSE
chr11_9406108_9406702	0.0448462	0.0440833	-0.000762839	4967	-0.0601917	5210.5	506	372	0.127135	0.895733	-0.895733	5210.5	0.190964	chr11	9406108	9406702	9406108	TRUE	FALSE
chr11_94134226_94134848	0.110983	0.0977159	-0.0132672	2017	-0.0433295	6115	506	372	0.272159	0.565177	-0.565177	6115	0.358443	chr11	94134226	94134848	40871668	FALSE	FALSE
chr11_94226672_94227412	0.0279215	0.0280688	0.000147369	8170	-0.0114327	7680.5	506	372	0.772091	0.112332	-0.112332	7680.5	0.821772	chr11	94226672	94227412	40779104	FALSE	FALSE
chr11_94276894_94278913	0.3639	0.439911	0.0760117	12994	0.413458	13478	506	372	1.07364e-25	24.9691	24.9691	13478	1.01004e-23	chr11	94276894	94278913	40727603	FALSE	TRUE
chr11_94501366_94502696	0.0385139	0.0331846	-0.00532927	2680	-0.236049	872	506	372	2.19314e-09	8.65893	-8.65893	872	1.61998e-08	chr11	94501366	94502696	40503820	FALSE	TRUE
chr11_94706291_94707060	0.0403784	0.0390699	-0.00130844	4058	-0.151345	1914	506	372	0.00012511	3.90271	-3.90271	1914	0.000420459	chr11	94706291	94707060	40299456	FALSE	FALSE
chr11_94770606_94771404	0.720759	0.729893	0.00913358	11195	0.0336181	9145.5	506	372	0.394238	0.404241	0.404241	9145	0.484861	chr11	94770606	94771404	40235112	FALSE	TRUE
chr11_9482109_9483152	0.0574917	0.0561969	-0.00129475	4083	-0.135886	2269	506	372	0.000573076	3.24179	-3.24179	2268	0.00167208	chr11	9482109	9483152	9482109	TRUE	FALSE
chr11_94822597_94823611	0.0368501	0.0366945	-0.00015562	7098	0.000616261	8128	506	372	0.987645	0.0053991	0.0053991	8128	0.991745	chr11	94822597	94823611	40182905	FALSE	FALSE
chr11_94883647_94884811	0.0604111	0.0627092	0.00229813	10063	0.0674593	9887	506	372	0.0873209	1.05888	1.05888	9887	0.139234	chr11	94883647	94884811	40121705	FALSE	TRUE
chr11_94963753_94964573	0.0251721	0.023579	-0.0015931	3756	-0.174141	1559	506	372	1.01623e-05	4.99301	-4.99301	1559	4.11074e-05	chr11	94963753	94964573	40041943	FALSE	FALSE
chr11_95522460_95524043	0.0249726	0.0243777	-0.000594839	5411	-0.0886034	3796	506	372	0.024728	1.60681	-1.60681	3795	0.047449	chr11	95522460	95524043	39482473	FALSE	FALSE
chr11_95656912_95657365	0.032166	0.0323035	0.000137448	8140	-0.0415764	6215	506	372	0.292035	0.534565	-0.534565	6215	0.379528	chr11	95656912	95657365	39349151	FALSE	FALSE
chr11_9594346_9596536	0.0508529	0.0555567	0.00470388	10668.5	0.250181	12725	506	372	2.28287e-10	9.64152	9.64152	12725	1.96107e-09	chr11	9594346	9596536	9594346	TRUE	FALSE
chr11_96122536_96123587	0.0552337	0.0517255	-0.00350812	2986	-0.17012	1628	506	372	1.61962e-05	4.79059	-4.79059	1628	6.30307e-05	chr11	96122536	96123587	38882929	FALSE	FALSE
chr11_9634969_9636065	0.0399173	0.0399811	6.38068e-05	7904	0.102777	10556	506	372	0.00919057	2.03666	2.03666	10556	0.0198604	chr11	9634969	9636065	9634969	TRUE	FALSE
chr11_9685520_9686050	0.0413489	0.0424561	0.00110724	9506	0.129585	11039	506	372	0.00102219	2.99047	2.99047	11039	0.00281284	chr11	9685520	9686050	9685520	TRUE	FALSE
chr11_98891543_98891821	0.0581853	0.0481522	-0.0100331	2238	-0.260391	678.5	506	372	4.11714e-11	10.3854	-10.3854	678.5	3.98962e-10	chr11	98891543	98891821	36114695	FALSE	FALSE
chr12_100535916_100536620	0.0322075	0.0323488	0.000141278	8152	-0.0112839	7690	506	372	0.774977	0.110711	-0.110711	7690	0.823938	chr12	100535916	100536620	33315275	FALSE	FALSE
chr12_100593253_100593814	0.0262176	0.02806	0.00184237	9902	0.126992	10990	506	372	0.00128802	2.89008	2.89008	10990	0.00346069	chr12	100593253	100593814	33258081	FALSE	FALSE
chr12_100594486_100594799	0.0331618	0.0327497	-0.000412051	6051	-0.0576098	5357	506	372	0.144275	0.840808	-0.840808	5356	0.211847	chr12	100594486	100594799	33257096	FALSE	FALSE
chr12_100660748_100661646	0.056718	0.0556719	-0.00104603	4412	-0.102639	3286	506	372	0.0092849	2.03222	-2.03222	3285	0.0200259	chr12	100660748	100661646	33190249	FALSE	FALSE
chr12_100967293_100967845	0.0535397	0.0554519	0.00191218	9941	0.198	12096	506	372	5.20976e-07	6.28318	6.28318	12096	2.61008e-06	chr12	100967293	100967845	32884050	FALSE	FALSE
chr12_101109863_101111622	0.277935	0.31237	0.0344353	12359	0.0808683	10130	506	372	0.0404065	1.39355	1.39355	10130	0.0723195	chr12	101109863	101111622	32740273	FALSE	TRUE
chr12_101603387_101603933	0.239115	0.205598	-0.0335175	1215	-0.106177	3135	506	372	0.00712251	2.14737	-2.14737	3134	0.0159459	chr12	101603387	101603933	32247962	FALSE	TRUE
chr12_101673790_101674156	0.0499402	0.048769	-0.00117121	4227.5	-0.0817502	4104	506	372	0.0382727	1.41711	-1.41711	4104	0.0691123	chr12	101673790	101674156	32177739	FALSE	FALSE
chr12_101801047_101802153	0.0329438	0.0323551	-0.000588723	5432	-0.0776117	4301	506	372	0.0491801	1.30821	-1.30821	4301	0.0855474	chr12	101801047	101802153	32049742	FALSE	FALSE
chr12_102091044_102092366	0.0405272	0.0395509	-0.00097635	4521	-0.107049	3096	506	372	0.0066648	2.17621	-2.17621	3095	0.0150756	chr12	102091044	102092366	31759529	FALSE	FALSE
chr12_102132753_102133415	0.955768	0.957024	0.00125676	9607	0.0730057	9974.5	506	372	0.064273	1.19197	1.19197	9975	0.107269	chr12	102132753	102133415	31718480	FALSE	FALSE
chr12_102270754_102271801	0.0426124	0.0427196	0.00010721	8052	0.0978952	10462	506	372	0.0130964	1.88285	1.88285	10462	0.0270949	chr12	102270754	102271801	31580094	FALSE	FALSE
chr12_102455420_102455983	0.038199	0.0373959	-0.000803076	4871	-0.0896659	3765.5	506	372	0.0230529	1.63727	-1.63727	3764.5	0.0445567	chr12	102455420	102455983	31395912	FALSE	FALSE
chr12_102513668_102514076	0.0369444	0.036506	-0.000438422	5967	-0.0681924	4800	506	372	0.0839372	1.07605	-1.07605	4800	0.13452	chr12	102513668	102514076	31337819	FALSE	FALSE
chr12_103218120_103218688	0.307994	0.300201	-0.00779358	2424	-0.0190722	7354	506	372	0.628902	0.201417	-0.201417	7354	0.700751	chr12	103218120	103218688	30633207	FALSE	TRUE
chr12_103351579_103352695	0.0991158	0.0366409	-0.0624748	695	-0.263196	655	506	372	2.54245e-11	10.5947	-10.5947	655	2.54376e-10	chr12	103351579	103352695	30499200	FALSE	TRUE
chr12_103359248_103359629	0.165183	0.0649075	-0.100275	339	-0.391814	109	506	372	3.05572e-23	22.5149	-22.5149	109	2.01931e-21	chr12	103359248	103359629	30492266	FALSE	TRUE
chr12_10365369_10365721	0.0671493	0.0656128	-0.00153655	3806	-0.0810967	4142	506	372	0.0398443	1.39963	-1.39963	4142	0.0714593	chr12	10365369	10365721	10365369	FALSE	FALSE
chr12_103889148_103889843	0.116735	0.0918482	-0.024887	1502	-0.271845	585	506	372	5.57478e-12	11.2538	-11.2538	585	6.23115e-11	chr12	103889148	103889843	29962052	FALSE	TRUE
chr12_104234273_104235327	0.03894	0.0399361	0.00099609	9422	0.104244	10584	506	372	0.00824065	2.08404	2.08404	10584	0.0180378	chr12	104234273	104235327	29616568	FALSE	FALSE
chr12_104323017_104324811	0.0432217	0.0421422	-0.00107945	4366	-0.0979536	3462	506	372	0.0130421	1.88465	-1.88465	3460	0.0270032	chr12	104323017	104324811	29527084	FALSE	FALSE
chr12_104359406_104360023	0.085118	0.0820389	-0.00307902	3088	-0.130467	2399	506	372	0.00094402	3.02502	-3.02502	2398	0.00261955	chr12	104359406	104360023	29491872	FALSE	FALSE
chr12_104457766_104459087	0.0243825	0.0242715	-0.000110922	7254	-0.0683199	4791.5	506	372	0.0833597	1.07904	-1.07904	4791.5	0.133721	chr12	104457766	104459087	29392808	FALSE	FALSE
chr12_104531174_104532539	0.221905	0.219041	-0.00286445	3153	-0.0178609	7402	506	372	0.650857	0.186515	-0.186515	7402	0.720591	chr12	104531174	104532539	29319356	FALSE	FALSE
chr12_104609397_104610172	0.0801204	0.293558	0.213437	13472	0.313634	13194	506	372	1.87564e-15	14.7268	14.7268	13194	3.49991e-14	chr12	104609397	104610172	29241723	FALSE	TRUE
chr12_104697348_104697984	0.270178	0.435785	0.165608	13413	0.146139	11338	506	372	0.000212285	3.67308	3.67308	11338	0.000678742	chr12	104697348	104697984	29153911	FALSE	FALSE
chr12_104850253_104852395	0.0424251	0.0387611	-0.00366408	2939	-0.216159	1053	506	372	4.28535e-08	7.36801	-7.36801	1053	2.54957e-07	chr12	104850253	104852395	28999500	FALSE	TRUE
chr12_105478089_105478517	0.0287087	0.0299536	0.00124488	9599	0.0924072	10353.5	506	372	0.0191788	1.71718	1.71718	10354	0.0378242	chr12	105478089	105478517	28373378	FALSE	FALSE
chr12_105501333_105501908	0.0232041	0.0230472	-0.000156902	7089	-0.0622742	5101.5	506	372	0.114501	0.94119	-0.94119	5101.5	0.174915	chr12	105501333	105501908	28349987	FALSE	FALSE
chr12_105629690_105630099	0.0305918	0.0296352	-0.000956642	4560	-0.105189	3191	506	372	0.00767561	2.11489	-2.11489	3190	0.0169655	chr12	105629690	105630099	28221796	FALSE	FALSE
chr12_105724272_105725052	0.0177336	0.0179185	0.000184871	8282	-0.00858515	7793	506	372	0.827845	0.082051	-0.082051	7793	0.866946	chr12	105724272	105725052	28126843	FALSE	FALSE
chr12_1058481_1059430	0.0504748	0.045964	-0.00451082	2807	-0.16146	1743	506	372	4.27168e-05	4.3694	-4.3694	1743	0.000155268	chr12	1058481	1059430	1058481	TRUE	FALSE
chr12_106532106_106533696	0.0992466	0.137623	0.0383764	12468	0.185484	11931	506	372	2.58666e-06	5.58726	5.58726	11931	1.15878e-05	chr12	106532106	106533696	27318199	FALSE	FALSE
chr12_106696232_106697199	0.0406683	0.0381178	-0.00255045	3273	-0.177866	1509	506	372	6.54159e-06	5.18432	-5.18432	1509	2.72925e-05	chr12	106696232	106697199	27154696	FALSE	FALSE
chr12_106751416_106751965	0.0240382	0.0238858	-0.000152357	7110	-0.0555697	5495	506	372	0.159028	0.798525	-0.798525	5495	0.229065	chr12	106751416	106751965	27099930	FALSE	FALSE
chr12_106974412_106974951	0.301446	0.44165	0.140203	13365	0.287773	13046	506	372	3.01318e-13	12.521	12.521	13046	4.14833e-12	chr12	106974412	106974951	26876944	FALSE	TRUE
chr12_106979429_106981086	0.238684	0.216163	-0.0225217	1598	-0.00563135	7907.5	506	372	0.886607	0.0522688	-0.0522688	7907.5	0.913582	chr12	106979429	106981086	26870809	FALSE	TRUE
chr12_107167762_107168747	0.0483436	0.0467395	-0.00160417	3747	-0.072655	4560	506	372	0.0655638	1.18334	-1.18334	4560	0.109155	chr12	107167762	107168747	26683148	FALSE	FALSE
chr12_107349152_107350089	0.0315356	0.0315336	-2.06381e-06	7665	-0.0255323	7025	506	372	0.517624	0.285986	-0.285986	7025	0.602168	chr12	107349152	107350089	26501806	FALSE	FALSE
chr12_107380558_107381076	0.0234284	0.0227874	-0.000640972	5274	-0.107739	3072	506	372	0.00632096	2.19922	-2.19922	3071	0.0143795	chr12	107380558	107381076	26470819	FALSE	FALSE
chr12_107486612_107487811	0.0281229	0.0278652	-0.000257678	6681	-0.105657	3165.5	506	372	0.0074093	2.13022	-2.13022	3164.5	0.0164736	chr12	107486612	107487811	26364084	FALSE	FALSE
chr12_10765955_10766331	0.0481937	0.0477382	-0.000455521	5905	-0.0345	6569	506	372	0.38195	0.417993	-0.417993	6569	0.472278	chr12	10765955	10766331	10765955	FALSE	FALSE
chr12_107711603_107714107	0.0490358	0.0591072	0.0100714	11254	0.0961686	10430.5	506	372	0.0147944	1.8299	1.8299	10430.5	0.0301383	chr12	107711603	107714107	26137788	FALSE	FALSE
chr12_108079442_108079893	0.0201936	0.0199054	-0.000288142	6549	-0.0655361	4935.5	506	372	0.0967219	1.01448	-1.01448	4935.5	0.151795	chr12	108079442	108079893	25772002	FALSE	FALSE
chr12_108237437_108238721	0.192463	0.116624	-0.0758392	531	-0.225955	965	506	372	1.02239e-08	7.99038	-7.99038	965	6.75955e-08	chr12	108237437	108238721	25613174	FALSE	TRUE
chr12_108522950_108523852	0.0550287	0.0459309	-0.0090978	2317	-0.183869	1433	506	372	3.15837e-06	5.50054	-5.50054	1433	1.39188e-05	chr12	108522950	108523852	25328043	FALSE	TRUE
chr12_10875137_10876180	0.0367597	0.0257259	-0.0110338	2161	-0.283395	508	506	372	6.82722e-13	12.1658	-12.1658	508	8.89311e-12	chr12	10875137	10876180	10875137	FALSE	FALSE
chr12_108908702_108909475	0.0281337	0.0269189	-0.00121479	4176	-0.146819	2012	506	372	0.000198306	3.70266	-3.70266	2012	0.000637808	chr12	108908702	108909475	24942420	FALSE	FALSE
chr12_109124224_109125964	0.0681456	0.0672711	-0.00087449	4712	-0.109684	3004	506	372	0.00543701	2.26464	-2.26464	3003	0.0125863	chr12	109124224	109125964	24725931	FALSE	FALSE
chr12_109490238_109490673	0.0295898	0.0294271	-0.000162639	7060	-0.0508946	5725	506	372	0.197102	0.705308	-0.705308	5725	0.274396	chr12	109490238	109490673	24361222	FALSE	FALSE
chr12_109535264_109536431	0.0352689	0.035005	-0.000263914	6651	-0.0319393	6699	506	372	0.418282	0.378531	-0.378531	6699	0.508066	chr12	109535264	109536431	24315464	FALSE	FALSE
chr12_109592315_109592633	0.0640715	0.0655133	0.00144184	9712	0.118205	10838	506	372	0.0027362	2.56285	2.56285	10838	0.00680133	chr12	109592315	109592633	24259262	FALSE	FALSE
chr12_109746826_109748378	0.0596361	0.0544571	-0.005179	2698	-0.159314	1778	506	372	5.39384e-05	4.2681	-4.2681	1778	0.000192595	chr12	109746826	109748378	24103517	FALSE	FALSE
chr12_109915131_109915638	0.0376952	0.0376395	-5.56707e-05	7458	-0.0373635	6428	506	372	0.343696	0.463825	-0.463825	6428	0.433686	chr12	109915131	109915638	23936257	FALSE	FALSE
chr12_1099557_1100785	0.0331103	0.03275	-0.000360299	6257	-0.0461452	5979	506	372	0.242214	0.615801	-0.615801	5979	0.325717	chr12	1099557	1100785	1099557	TRUE	FALSE
chr12_110010994_110011599	0.0301821	0.0298872	-0.000294818	6524	-0.0189872	7363	506	372	0.630432	0.200362	-0.200362	7363	0.701648	chr12	110010994	110011599	23840296	FALSE	FALSE
chr12_110151327_110152758	0.0276173	0.0276534	3.61074e-05	7796	0.00281567	8207	506	372	0.943213	0.0253902	0.0253902	8207	0.957347	chr12	110151327	110152758	23699137	FALSE	FALSE
chr12_110156267_110156496	0.561213	0.339673	-0.22154	46	-0.262601	661	506	372	2.81733e-11	10.5502	-10.5502	661	2.79812e-10	chr12	110156267	110156496	23695399	FALSE	TRUE
chr12_110271000_110271582	0.279547	0.337537	0.0579903	12821	0.151175	11427	506	372	0.000127322	3.8951	3.8951	11427	0.000427151	chr12	110271000	110271582	23580313	FALSE	FALSE
chr12_110318011_110318778	0.038668	0.0380045	-0.0006635	5211	-0.0173722	7419.5	506	372	0.659804	0.180585	-0.180585	7420	0.728235	chr12	110318011	110318778	23533117	FALSE	FALSE
chr12_110337980_110338591	0.0299936	0.029783	-0.000210529	6872	-0.0493434	5799	506	372	0.211105	0.675501	-0.675501	5799	0.290634	chr12	110337980	110338591	23513304	FALSE	FALSE
chr12_110433797_110434205	0.0250012	0.0247555	-0.000245746	6726	-0.0283905	6882	506	372	0.47186	0.326187	-0.326187	6882	0.558961	chr12	110433797	110434205	23417690	FALSE	FALSE
chr12_110437137_110437651	0.0232114	0.0229556	-0.000255778	6690	-0.0637511	5026	506	372	0.106156	0.974055	-0.974055	5026	0.164298	chr12	110437137	110437651	23414244	FALSE	FALSE
chr12_110486083_110486574	0.0264341	0.0264325	-1.66148e-06	7667	0.0161715	8658	506	372	0.681988	0.166223	0.166223	8658	0.747241	chr12	110486083	110486574	23365321	FALSE	FALSE
chr12_110562095_110562700	0.0253788	0.0247949	-0.00058387	5450	-0.0770963	4326.5	506	372	0.0507053	1.29495	-1.29495	4326.5	0.0878396	chr12	110562095	110562700	23289195	FALSE	FALSE
chr12_110718392_110720062	0.032011	0.0307505	-0.00126053	4125	-0.146489	2021	506	372	0.000204966	3.68832	-3.68832	2021	0.000657355	chr12	110718392	110720062	23131833	FALSE	FALSE
chr12_110841021_110841548	0.0358687	0.0360009	0.000132114	8123	-0.0191997	7346	506	372	0.626609	0.203003	-0.203003	7346	0.698886	chr12	110841021	110841548	23010347	FALSE	FALSE
chr12_110887861_110888245	0.035629	0.0349203	-0.00070874	5095	-0.0594904	5253	506	372	0.131626	0.880659	-0.880659	5252	0.196532	chr12	110887861	110888245	22963650	FALSE	FALSE
chr12_110905879_110907183	0.0298696	0.0295386	-0.000330986	6386	-0.0498959	5776.5	506	372	0.206038	0.686054	-0.686054	5776.5	0.284845	chr12	110905879	110907183	22944712	FALSE	FALSE
chr12_110939456_110940173	0.0284764	0.0281003	-0.000376035	6196	-0.0807727	4155.5	506	372	0.0406438	1.39101	-1.39101	4155.5	0.0726387	chr12	110939456	110940173	22911722	FALSE	FALSE
chr12_111051693_111052150	0.0589393	0.0581344	-0.000804871	4863	-0.0732182	4531.5	506	372	0.0635009	1.19722	-1.19722	4531.5	0.106151	chr12	111051693	111052150	22799745	FALSE	FALSE
chr12_111126611_111127347	0.0403325	0.0432974	0.00296494	10282	0.100206	10510.5	506	372	0.0110944	1.95489	1.95489	10510.5	0.0234581	chr12	111126611	111127347	22724548	FALSE	FALSE
chr12_111180006_111181028	0.0235221	0.0230612	-0.000460906	5881	-0.0682881	4795.5	506	372	0.0835037	1.07829	-1.07829	4795.5	0.133873	chr12	111180006	111181028	22670867	FALSE	FALSE
chr12_111471061_111471578	0.043378	0.0360641	-0.00731396	2478	-0.273248	573	506	372	4.3394e-12	11.3626	-11.3626	573	4.93584e-11	chr12	111471061	111471578	22380317	FALSE	TRUE
chr12_111471960_111473546	0.0644208	0.0486471	-0.0157737	1895	-0.283066	512	506	372	7.25703e-13	12.1392	-12.1392	512	9.37187e-12	chr12	111471960	111473546	22378349	FALSE	TRUE
chr12_111800834_111801244	0.947437	0.948637	0.00120032	9570	0.0429948	9367	506	372	0.27588	0.559279	0.559279	9367	0.362392	chr12	111800834	111801244	22050651	FALSE	FALSE
chr12_111806559_111807060	0.0265075	0.025342	-0.00116548	4234	-0.185186	1411.5	506	372	2.68391e-06	5.57123	-5.57123	1411.5	1.19917e-05	chr12	111806559	111807060	22044835	FALSE	FALSE
chr12_111842938_111844392	0.0354535	0.0371793	0.00172575	9845	0.23453	12571	506	372	2.77635e-09	8.55653	8.55653	12571	2.01777e-08	chr12	111842938	111844392	22007503	FALSE	FALSE
chr12_111855896_111856750	0.965745	0.966559	0.000814557	9302	0.0753751	10014	506	372	0.0560898	1.25112	1.25112	10014	0.0956868	chr12	111855896	111856750	21995145	FALSE	FALSE
chr12_112035612_112037558	0.0687071	0.0666289	-0.00207818	3458	-0.122168	2630	506	372	0.00195906	2.70795	-2.70795	2630	0.00503402	chr12	112035612	112037558	21814337	FALSE	FALSE
chr12_112123246_112124059	0.0290827	0.028765	-0.000317656	6433	-0.0593735	5258.5	506	372	0.132386	0.878158	-0.878158	5258	0.197493	chr12	112123246	112124059	21727836	FALSE	FALSE
chr12_112204498_112204979	0.0376193	0.0372733	-0.000346065	6326	0.0434889	9382.5	506	372	0.270399	0.567994	0.567994	9382.5	0.356575	chr12	112204498	112204979	21646916	FALSE	FALSE
chr12_112279692_112280714	0.0288123	0.0279976	-0.000814728	4841	-0.131784	2369	506	372	0.0008375	3.07702	-3.07702	2367	0.00234899	chr12	112279692	112280714	21571181	FALSE	FALSE
chr12_112450905_112451856	0.026618	0.0265024	-0.00011562	7239	-0.0367525	6450	506	372	0.351646	0.453895	-0.453895	6450.5	0.441988	chr12	112450905	112451856	21400039	FALSE	FALSE
chr12_112546147_112546706	0.0265206	0.024886	-0.00163455	3721	-0.113902	2878	506	372	0.00389122	2.40991	-2.40991	2877	0.0093069	chr12	112546147	112546706	21305189	FALSE	FALSE
chr12_112563184_112563788	0.041429	0.0413366	-9.23872e-05	7339	-0.0388563	6345	506	372	0.324759	0.488439	-0.488439	6345	0.414423	chr12	112563184	112563788	21288107	FALSE	FALSE
chr12_112622182_112622815	0.943003	0.94429	0.0012874	9625	0.115374	10785	506	372	0.00345401	2.46168	2.46168	10785	0.00837656	chr12	112622182	112622815	21229080	FALSE	FALSE
chr12_112819466_112820489	0.0345039	0.0343904	-0.000113409	7246	-0.0386544	6351.5	506	372	0.32728	0.485081	-0.485081	6351.5	0.417285	chr12	112819466	112820489	21031406	FALSE	FALSE
chr12_112856457_112857243	0.0343326	0.0342764	-5.61923e-05	7455	-0.044477	6053.5	506	372	0.259663	0.585591	-0.585591	6053.5	0.34524	chr12	112856457	112857243	20994652	FALSE	FALSE
chr12_113013099_113013529	0.387177	0.379436	-0.00774071	2434	-0.0115815	7670.5	506	372	0.769208	0.113956	-0.113956	7670.5	0.819734	chr12	113013099	113013529	20838366	FALSE	TRUE
chr12_11323771_11324331	0.0669264	0.0657858	-0.00114067	4274	-0.086914	3862	506	372	0.0276084	1.55896	-1.55896	3862	0.0522144	chr12	11323771	11324331	11323771	FALSE	FALSE
chr12_113494389_113495534	0.190244	0.153097	-0.0371472	1132	-0.349728	223	506	372	7.70952e-19	18.113	-18.113	223	2.44592e-17	chr12	113494389	113495534	20356361	FALSE	TRUE
chr12_113572977_113573758	0.0375667	0.0578084	0.0202417	11860	0.331368	13268	506	372	4.51149e-17	16.3457	16.3457	13268	1.06662e-15	chr12	113572977	113573758	20278137	FALSE	FALSE
chr12_113622761_113623931	0.0288721	0.0290495	0.000177318	8264	-0.0128671	7607	506	372	0.744426	0.128178	-0.128178	7607	0.800249	chr12	113622761	113623931	20227964	FALSE	FALSE
chr12_113659038_113659657	0.042055	0.0416202	-0.000434734	5983	-0.0705087	4681	506	372	0.0739384	1.13113	-1.13113	4681	0.120753	chr12	113659038	113659657	20192238	FALSE	FALSE
chr12_113796217_113796847	0.0349255	0.0349755	4.9971e-05	7852	-0.0367791	6447	506	372	0.351298	0.454325	-0.454325	6447	0.441796	chr12	113796217	113796847	20055048	FALSE	FALSE
chr12_113900750_113906442	0.171551	0.173575	0.00202408	9979	0.0491627	9502.5	506	372	0.212781	0.672067	0.672067	9502.5	0.292644	chr12	113900750	113906442	19945453	FALSE	TRUE
chr12_113908887_113910681	0.183133	0.0968549	-0.0862784	451	-0.371722	151	506	372	4.44223e-21	20.3524	-20.3524	151	2.07513e-19	chr12	113908887	113910681	19941214	FALSE	TRUE
chr12_113913615_113914322	0.326482	0.24843	-0.0780522	512	-0.0850546	3967.5	506	372	0.0311089	1.50712	-1.50712	3967.5	0.0576751	chr12	113913615	113914322	19937573	FALSE	TRUE
chr12_113916433_113916717	0.575798	0.529897	-0.0459015	974	-0.105636	3168	506	372	0.00742122	2.12952	-2.12952	3167	0.0164947	chr12	113916433	113916717	19935178	FALSE	TRUE
chr12_113917394_113918107	0.219195	0.201383	-0.0178125	1793	-0.0393451	6317	506	372	0.31871	0.496605	-0.496605	6317	0.408087	chr12	113917394	113918107	19933788	FALSE	TRUE
chr12_114029318_114029752	0.201092	0.248897	0.0478047	12663	0.145799	11334.5	506	372	0.000219617	3.65833	3.65833	11334.5	0.000700202	chr12	114029318	114029752	19822143	FALSE	TRUE
chr12_114404002_114404377	0.0345281	0.0337675	-0.000760552	4973	-0.0625292	5088	506	372	0.113025	0.946827	-0.946827	5088	0.173069	chr12	114404002	114404377	19447518	FALSE	FALSE
chr12_114838312_114838889	0.456392	0.438603	-0.0177895	1794	-0.0537953	5590	506	372	0.172765	0.762544	-0.762544	5590	0.245485	chr12	114838312	114838889	19013006	FALSE	TRUE
chr12_114843022_114843610	0.133341	0.0502248	-0.0831165	485	-0.296188	445	506	372	6.04522e-14	13.2186	-13.2186	445	9.0994e-13	chr12	114843022	114843610	19008285	FALSE	TRUE
chr12_114845861_114847650	0.396411	0.340141	-0.0562696	791	-0.122094	2635	506	372	0.00197155	2.70519	-2.70519	2635	0.00506228	chr12	114845861	114847650	19004245	FALSE	TRUE
chr12_114878143_114879155	0.289304	0.184656	-0.104648	321	-0.275129	560	506	372	3.09526e-12	11.5093	-11.5093	560	3.59618e-11	chr12	114878143	114879155	18972740	FALSE	TRUE
chr12_115102687_115103982	0.519524	0.36553	-0.153993	136	-0.231852	919	506	372	4.19188e-09	8.37759	-8.37759	919	2.94235e-08	chr12	115102687	115103982	18747913	FALSE	TRUE
chr12_115104848_115105548	0.486909	0.416765	-0.0701441	590	-0.118609	2730	506	372	0.00264577	2.57745	-2.57745	2729	0.00659956	chr12	115104848	115105548	18746347	FALSE	FALSE
chr12_115120774_115122945	0.0493995	0.0544836	0.0050841	10739	0.135886	11173	506	372	0.000573076	3.24179	3.24179	11173	0.00167208	chr12	115120774	115122945	18728950	FALSE	FALSE
chr12_115124729_115125152	0.534742	0.354676	-0.180066	89	-0.270028	607	506	372	7.69786e-12	11.1136	-11.1136	607	8.34931e-11	chr12	115124729	115125152	18726743	FALSE	TRUE
chr12_115135925_115136350	0.218364	0.119577	-0.0987863	352	-0.227995	949	506	372	7.52894e-09	8.12327	-8.12327	949	5.08955e-08	chr12	115135925	115136350	18715545	FALSE	TRUE
chr12_115173614_115174822	0.311502	0.332069	0.0205668	11871	0.0292405	9023	506	372	0.458693	0.338478	0.338478	9023	0.54647	chr12	115173614	115174822	18677073	FALSE	TRUE
chr12_117175623_117176436	0.0343786	0.0333194	-0.00105922	4399	-0.0889647	3782	506	372	0.024147	1.61714	-1.61714	3781	0.046479	chr12	117175623	117176436	16675459	FALSE	FALSE
chr12_117187803_117188025	0.914683	0.91516	0.000477016	8866	-0.0335968	6613	506	372	0.394537	0.403912	-0.403912	6613	0.485185	chr12	117187803	117188025	16663870	FALSE	TRUE
chr12_117316389_117317611	0.0711741	0.0837336	0.0125594	11434	0.142197	11273	506	372	0.000313338	3.50399	3.50399	11273	0.000967583	chr12	117316389	117317611	16534284	FALSE	TRUE
chr12_117318708_117319521	0.0389455	0.0378898	-0.00105577	4404	-0.1001	3374	506	372	0.0111801	1.95155	-1.95155	3372	0.0236173	chr12	117318708	117319521	16532374	FALSE	FALSE
chr12_117348645_117349207	0.03731	0.0368909	-0.000419032	6032	-0.0272855	6933.5	506	372	0.489284	0.310439	-0.310439	6933.5	0.575675	chr12	117348645	117349207	16502688	FALSE	FALSE
chr12_117536290_117537421	0.0505421	0.0590736	0.00853149	11121	0.175783	11780	506	372	8.37764e-06	5.07688	5.07688	11780	3.43498e-05	chr12	117536290	117537421	16314474	FALSE	FALSE
chr12_117627650_117628488	0.0368934	0.0361657	-0.000727702	5052	-0.0886512	3794	506	372	0.0246504	1.60818	-1.60818	3793	0.047327	chr12	117627650	117628488	16223407	FALSE	FALSE
chr12_117798076_117799448	0.127537	0.101643	-0.0258932	1464	-0.172744	1582	506	372	1.19621e-05	4.92219	-4.92219	1582	4.77463e-05	chr12	117798076	117799448	16052447	FALSE	TRUE
chr12_118406590_118407364	0.0382216	0.0501031	0.0118815	11384	0.339262	13296	506	372	8.05022e-18	17.0942	17.0942	13296	2.13836e-16	chr12	118406590	118407364	15444531	FALSE	FALSE
chr12_118454391_118454996	0.0209468	0.0210131	6.6366e-05	7914	-0.00887203	7784	506	372	0.822183	0.0850313	-0.0850313	7784	0.862083	chr12	118454391	118454996	15396899	FALSE	FALSE
chr12_118541054_118542135	0.0654671	0.0636714	-0.00179571	3609	-0.0904628	3741	506	372	0.0218621	1.66031	-1.66031	3740	0.0424672	chr12	118541054	118542135	15309760	FALSE	FALSE
chr12_118573730_118574731	0.0273746	0.0283761	0.00100151	9429	0.0759807	10027	506	372	0.0541434	1.26645	1.26645	10027	0.0928221	chr12	118573730	118574731	15277164	FALSE	FALSE
chr12_118809324_118811021	0.0347727	0.0338077	-0.000965036	4544	-0.135875	2270.5	506	372	0.000573647	3.24136	-3.24136	2270	0.0016723	chr12	118809324	118811021	15040874	FALSE	FALSE
chr12_118814014_118814839	0.0670434	0.0658945	-0.00114893	4263	-0.0391219	6327	506	372	0.321462	0.49287	-0.49287	6327.5	0.411106	chr12	118814014	118814839	15037056	FALSE	FALSE
chr12_119212110_119212393	0.248983	0.08755	-0.161433	120	-0.417549	67	506	372	3.56811e-26	25.4476	-25.4476	67	3.74707e-24	chr12	119212110	119212393	14639502	FALSE	TRUE
chr12_119419105_119419810	0.12222	0.0624693	-0.0597511	736	-0.380382	128	506	372	5.36123e-22	21.2707	-21.2707	128	2.88209e-20	chr12	119419105	119419810	14432085	FALSE	FALSE
chr12_119772353_119772594	0.27858	0.30498	0.0264004	12097	0.0920991	10348	506	372	0.0195838	1.7081	1.7081	10348	0.0385165	chr12	119772353	119772594	14079301	FALSE	FALSE
chr12_120031494_120033212	0.129339	0.105124	-0.0242152	1535	-0.210634	1116.5	506	372	9.36517e-08	7.02848	-7.02848	1116.5	5.26213e-07	chr12	120031494	120033212	13818683	FALSE	TRUE
chr12_120105502_120106232	0.0359194	0.035265	-0.000654384	5236	-0.0489927	5816.5	506	372	0.214368	0.668841	-0.668841	5816.5	0.294318	chr12	120105502	120106232	13745663	FALSE	FALSE
chr12_120314847_120315169	0.0340111	0.0342382	0.000227142	8388	0.0303562	9053	506	372	0.441728	0.354845	0.354845	9053	0.530081	chr12	120314847	120315169	13536726	FALSE	FALSE
chr12_120426547_120428066	0.0539384	0.0533534	-0.000585075	5445	0.0071295	8363	506	372	0.856704	0.0671691	0.0671691	8363	0.890901	chr12	120426547	120428066	13423829	FALSE	FALSE
chr12_120554162_120555224	0.0400591	0.0392236	-0.000835489	4805	-0.0965404	3521	506	372	0.0144131	1.84124	-1.84124	3519	0.0294546	chr12	120554162	120555224	13296671	FALSE	FALSE
chr12_120632222_120632784	0.0358199	0.0357527	-6.72005e-05	7421	0.0290705	9015	506	372	0.461309	0.336008	0.336008	9015	0.548863	chr12	120632222	120632784	13219111	FALSE	FALSE
chr12_120638588_120639116	0.0326919	0.0324371	-0.000254765	6693.5	-0.0264567	6978.5	506	372	0.502576	0.298799	-0.298799	6978.5	0.587995	chr12	120638588	120639116	13212779	FALSE	FALSE
chr12_120875654_120876366	0.0547139	0.0534686	-0.00124525	4140	-0.0833758	4036	506	372	0.03459	1.46105	-1.46105	4036	0.0633145	chr12	120875654	120876366	12975529	FALSE	FALSE
chr12_120884047_120884703	0.0486515	0.0483045	-0.00034707	6323	-0.0671937	4853	506	372	0.0885737	1.0527	-1.0527	4853	0.1409	chr12	120884047	120884703	12967192	FALSE	FALSE
chr12_120906678_120907894	0.0298666	0.0284706	-0.00139596	3981	-0.150655	1928	506	372	0.000134328	3.87183	-3.87183	1928	0.000447551	chr12	120906678	120907894	12944001	FALSE	FALSE
chr12_120933649_120934713	0.047693	0.0493208	0.00162783	9803	0.0879022	10265	506	372	0.0258904	1.58686	1.58686	10265	0.0493718	chr12	120933649	120934713	12917182	FALSE	FALSE
chr12_120966788_120967038	0.0316644	0.0313578	-0.000306629	6475	-0.0587892	5293	506	372	0.136238	0.865701	-0.865701	5293	0.202038	chr12	120966788	120967038	12884857	FALSE	FALSE
chr12_121018728_121019369	0.0522707	0.0519532	-0.000317566	6435	-0.043032	6130	506	372	0.275465	0.559933	-0.559933	6130	0.361952	chr12	121018728	121019369	12832526	FALSE	FALSE
chr12_121078161_121079483	0.0494004	0.0674181	0.0180177	11747	0.253581	12761	506	372	1.29999e-10	9.88606	9.88606	12761	1.15709e-09	chr12	121078161	121079483	12772412	FALSE	FALSE
chr12_121124111_121125479	0.0325651	0.032306	-0.000259124	6673	-0.0300268	6813.5	506	372	0.446699	0.349985	-0.349985	6813.5	0.534626	chr12	121124111	121125479	12726416	FALSE	FALSE
chr12_121148239_121148853	0.0402249	0.0400372	-0.000187732	6964	-0.0443283	6060	506	372	0.26126	0.582928	-0.582928	6061	0.346955	chr12	121148239	121148853	12703042	FALSE	FALSE
chr12_121163472_121163913	0.0352191	0.0373996	0.00218047	10032	0.223246	12430	506	372	1.52881e-08	7.81565	7.81565	12430	9.83887e-08	chr12	121163472	121163913	12687982	FALSE	FALSE
chr12_121341414_121342436	0.0320112	0.0315721	-0.000439148	5963	-0.0112627	7691	506	372	0.77539	0.11048	-0.11048	7691	0.824312	chr12	121341414	121342436	12509459	FALSE	FALSE
chr12_121416485_121416817	0.773484	0.838837	0.0653529	12893	0.271771	12919	506	372	5.64914e-12	11.248	11.248	12919	6.29867e-11	chr12	121416485	121416817	12435078	FALSE	FALSE
chr12_121454153_121454357	0.0201515	0.0197698	-0.00038174	6176	-0.104159	3227	506	372	0.00829322	2.08128	-2.08128	3226	0.0181441	chr12	121454153	121454357	12397538	FALSE	FALSE
chr12_121734045_121735169	0.0329255	0.0336336	0.000708006	9158	0.0437651	9397	506	372	0.267367	0.572892	0.572892	9397	0.35361	chr12	121734045	121735169	12116726	FALSE	FALSE
chr12_121837380_121838396	0.0239529	0.0235337	-0.000419185	6031	-0.100737	3356.5	506	372	0.0106746	1.97165	-1.97165	3354	0.0226588	chr12	121837380	121838396	12013499	FALSE	FALSE
chr12_121975028_121976140	0.023417	0.0232234	-0.000193639	6935	-0.0421554	6180	506	372	0.285365	0.5446	-0.5446	6180	0.372395	chr12	121975028	121976140	11875755	FALSE	FALSE
chr12_122016170_122017693	0.382418	0.357976	-0.0244422	1521	-0.110151	2991	506	372	0.00524185	2.28052	-2.28052	2990	0.0121824	chr12	122016170	122017693	11834202	FALSE	TRUE
chr12_122018170_122018457	0.0265832	0.0259967	-0.00058648	5441	-0.111033	2962	506	372	0.00489086	2.31061	-2.31061	2961	0.0114611	chr12	122018170	122018457	11833438	FALSE	FALSE
chr12_122064176_122065142	0.0323536	0.0321161	-0.000237472	6763	0.0108802	8482	506	372	0.782827	0.106334	0.106334	8482	0.830329	chr12	122064176	122065142	11786753	FALSE	FALSE
chr12_122230903_122232359	0.101179	0.147401	0.0462218	12624	0.404809	13467	506	372	1.06447e-24	23.9729	23.9729	13467	8.48255e-23	chr12	122230903	122232359	11619536	FALSE	FALSE
chr12_122238028_122239351	0.0343544	0.0348835	0.000529137	8946	0.0491202	9500	506	372	0.213177	0.67126	0.67126	9500	0.29307	chr12	122238028	122239351	11612544	FALSE	FALSE
chr12_122240899_122243390	0.0317785	0.0317394	-3.90969e-05	7518	-0.0575673	5362	506	372	0.144572	0.839917	-0.839917	5362	0.212144	chr12	122240899	122243390	11608505	FALSE	FALSE
chr12_122249843_122250164	0.037768	0.0326481	-0.00511984	2705	-0.225302	972	506	372	1.12705e-08	7.94806	-7.94806	972	7.40451e-08	chr12	122249843	122250164	11601731	FALSE	FALSE
chr12_122254907_122255494	0.924412	0.929101	0.00468922	10665	0.087764	10262	506	372	0.0261249	1.58295	1.58295	10262	0.0497559	chr12	122254907	122255494	11596401	FALSE	FALSE
chr12_122326482_122327044	0.0254283	0.0239712	-0.00145711	3909	-0.112606	2915	506	372	0.00431735	2.36478	-2.36478	2914	0.0102322	chr12	122326482	122327044	11524851	FALSE	FALSE
chr12_122356315_122356853	0.281424	0.535108	0.253684	13492	0.238217	12608	506	372	1.56275e-09	8.80611	8.80611	12608	1.18403e-08	chr12	122356315	122356853	11495042	FALSE	FALSE
chr12_122687800_122689106	0.0734719	0.114423	0.0409515	12527	0.264174	12860	506	372	2.14681e-11	10.6682	10.6682	12860	2.18504e-10	chr12	122687800	122689106	11162789	FALSE	FALSE
chr12_122710054_122711371	0.0384562	0.0359191	-0.00253715	3277	-0.193835	1296	506	372	8.97604e-07	6.04692	-6.04692	1296	4.34125e-06	chr12	122710054	122711371	11140524	FALSE	FALSE
chr12_122750769_122751228	0.0286975	0.0288374	0.000139959	8149	-0.0241935	7095.5	506	372	0.539823	0.267748	-0.267748	7095.5	0.622329	chr12	122750769	122751228	11100667	FALSE	FALSE
chr12_122906404_122907011	0.0427466	0.0432425	0.000495862	8897	0.014259	8592	506	372	0.717892	0.143941	0.143941	8592	0.77765	chr12	122906404	122907011	10944884	FALSE	FALSE
chr12_122984995_122985644	0.0370566	0.0370419	-1.4782e-05	7614	-0.021006	7250	506	372	0.594527	0.225829	-0.225829	7250	0.671227	chr12	122984995	122985644	10866251	FALSE	FALSE
chr12_123011261_123011765	0.0528225	0.0523927	-0.000429809	5997	-0.0309937	6756	506	372	0.432197	0.364318	-0.364318	6756	0.521044	chr12	123011261	123011765	10840130	FALSE	FALSE
chr12_123236994_123237664	0.0374433	0.0374227	-2.05971e-05	7593	-0.0316206	6716.5	506	372	0.422943	0.373718	-0.373718	6716.5	0.512441	chr12	123236994	123237664	10614231	FALSE	FALSE
chr12_123319750_123321043	0.0356317	0.0350024	-0.000629272	5312	-0.0680756	4806	506	372	0.0844694	1.0733	-1.0733	4806	0.135277	chr12	123319750	123321043	10530852	FALSE	FALSE
chr12_123351641_123351918	0.89984	0.892057	-0.00778377	2427	-0.0865528	3883	506	372	0.0282606	1.54882	-1.54882	3883	0.0532249	chr12	123351641	123351918	10499977	FALSE	FALSE
chr12_123380333_123380894	0.0768922	0.101367	0.0244746	12028	0.132273	11092	506	372	0.000800904	3.09642	3.09642	11092	0.00225428	chr12	123380333	123380894	10471001	FALSE	FALSE
chr12_123450868_123451207	0.0764696	0.0803382	0.00386855	10527	0.10197	10540	506	372	0.00975442	2.0108	2.0108	10540	0.0209153	chr12	123450868	123451207	10400688	FALSE	FALSE
chr12_123459151_123460032	0.0509333	0.0508085	-0.00012473	7206	-0.0469846	5928	506	372	0.233753	0.631242	-0.631242	5928	0.316349	chr12	123459151	123460032	10391863	FALSE	FALSE
chr12_123464820_123465972	0.0434952	0.0425298	-0.000965398	4542	-0.0252348	7038	506	372	0.522516	0.281901	-0.281901	7038	0.606817	chr12	123464820	123465972	10385923	FALSE	FALSE
chr12_123470553_123471102	0.95169	0.952567	0.000876606	9340	0.0538431	9606	506	372	0.172384	0.763504	0.763504	9606	0.245097	chr12	123470553	123471102	10380793	FALSE	FALSE
chr12_123481890_123482117	0.953153	0.95707	0.00391698	10534	0.144449	11307.5	506	372	0.000251126	3.60011	3.60011	11308	0.00079006	chr12	123481890	123482117	10369778	FALSE	TRUE
chr12_123717367_123718388	0.0315627	0.0314901	-7.25426e-05	7405	-0.0308555	6763	506	372	0.434252	0.362258	-0.362258	6763	0.523103	chr12	123717367	123718388	10133507	FALSE	FALSE
chr12_123848617_123849919	0.040998	0.0405396	-0.000458397	5892	-0.069085	4747	506	372	0.079962	1.09712	-1.09712	4747	0.129158	chr12	123848617	123849919	10001976	FALSE	FALSE
chr12_123868267_123869381	0.0336504	0.0338415	0.00019113	8298	-0.0177866	7406	506	372	0.652215	0.185609	-0.185609	7406	0.721623	chr12	123868267	123869381	9982514	TRUE	FALSE
chr12_123873794_123874597	0.0427548	0.0457399	0.0029851	10289	0.216881	12332	506	372	3.86344e-08	7.41303	7.41303	12332	2.31687e-07	chr12	123873794	123874597	9977298	TRUE	FALSE
chr12_123920582_123921462	0.0435963	0.0439419	0.000345688	8643	0.0199328	8772	506	372	0.613497	0.212187	0.212187	8772	0.687546	chr12	123920582	123921462	9930433	TRUE	FALSE
chr12_124068935_124069699	0.0467169	0.0467492	3.23467e-05	7786	0.0099558	8444	506	372	0.800881	0.096432	0.096432	8444	0.844716	chr12	124068935	124069699	9782196	TRUE	FALSE
chr12_124086217_124087015	0.0223229	0.0222383	-8.45734e-05	7356	-0.0535403	5599	506	372	0.17481	0.757433	-0.757433	5599	0.247922	chr12	124086217	124087015	9764880	TRUE	FALSE
chr12_124118097_124118479	0.0286919	0.0285849	-0.000107002	7271	-0.0630499	5066	506	372	0.110056	0.958385	-0.958385	5066	0.16929	chr12	124118097	124118479	9733416	TRUE	FALSE
chr12_124155578_124156171	0.0409985	0.0387993	-0.00219919	3394	-0.10367	3244	506	372	0.00860136	2.06543	-2.06543	3243	0.0187456	chr12	124155578	124156171	9695724	TRUE	FALSE
chr12_124196646_124197507	0.0177664	0.0180355	0.000269039	8493	-0.00285818	8005	506	372	0.942356	0.0257851	-0.0257851	8005	0.956763	chr12	124196646	124197507	9654388	TRUE	FALSE
chr12_12419679_12420541	0.0321122	0.0305686	-0.00154352	3798	-0.185696	1403	506	372	2.51928e-06	5.59872	-5.59872	1403	1.13084e-05	chr12	12419679	12420541	12419679	FALSE	FALSE
chr12_124246524_124247254	0.0332121	0.533376	0.500164	13547	0.419822	13488	506	372	1.92536e-26	25.7155	25.7155	13488	2.12055e-24	chr12	124246524	124247254	9604641	TRUE	FALSE
chr12_124456573_124458728	0.0408204	0.0410706	0.000250153	8441	0.0306537	9061	506	372	0.437265	0.359255	0.359255	9061	0.525844	chr12	124456573	124458728	9393167	TRUE	FALSE
chr12_124788559_124788884	0.867301	0.86445	-0.00285077	3160	0.0598782	9733	506	372	0.129128	0.888981	0.888981	9733	0.193441	chr12	124788559	124788884	9063011	TRUE	TRUE
chr12_124808972_124809176	0.94906	0.948833	-0.000227451	6798	0.0410876	9322	506	372	0.297746	0.526155	0.526155	9322	0.385655	chr12	124808972	124809176	9042719	TRUE	FALSE
chr12_124821019_124821593	0.981025	0.981502	0.000477254	8867	0.0584598	9698	506	372	0.138447	0.858716	0.858716	9698	0.204821	chr12	124821019	124821593	9030302	TRUE	FALSE
chr12_125028132_125028378	0.682229	0.68457	0.00234151	10082	0.0260105	8941	506	372	0.509811	0.292591	0.292591	8941	0.59497	chr12	125028132	125028378	8823517	TRUE	FALSE
chr12_12502942_12503465	0.0411584	0.0423901	0.00123169	9593	0.139594	11236	506	372	0.000403116	3.39457	3.39457	11236	0.0012187	chr12	12502942	12503465	12502942	FALSE	FALSE
chr12_12509911_12510428	0.0431975	0.0422904	-0.000907023	4658	-0.120734	2669	506	372	0.00221327	2.65497	-2.65497	2668	0.00561377	chr12	12509911	12510428	12509911	FALSE	FALSE
chr12_125347784_125348688	0.0364142	0.0378566	0.00144245	9713	0.143599	11288	506	372	0.000273099	3.56368	3.56368	11288	0.00085246	chr12	125347784	125348688	8503207	TRUE	FALSE
chr12_125398558_125399899	0.0427591	0.0436693	0.0009102	9363	0.0975923	10459	506	372	0.0133812	1.87351	1.87351	10459	0.0276165	chr12	125398558	125399899	8451996	TRUE	FALSE
chr12_125473414_125473824	0.0294867	0.029481	-5.71832e-06	7647	-0.0244964	7078	506	372	0.534761	0.271841	-0.271841	7078	0.61786	chr12	125473414	125473824	8378071	TRUE	FALSE
chr12_125478162_125478849	0.0187396	0.0184332	-0.000306392	6478	-0.0655043	4937	506	372	0.0968843	1.01375	-1.01375	4937	0.152032	chr12	125478162	125478849	8373046	TRUE	FALSE
chr12_125549672_125550311	0.0405966	0.0388169	-0.00177974	3616	-0.175464	1540	506	372	8.69888e-06	5.06054	-5.06054	1540	3.56131e-05	chr12	125549672	125550311	8301584	TRUE	FALSE
chr12_125670117_125672112	0.144952	0.159646	0.0146936	11573	0.135429	11166	506	372	0.000598117	3.22321	3.22321	11166	0.00173878	chr12	125670117	125672112	8179783	TRUE	TRUE
chr12_126345899_126346531	0.623747	0.584408	-0.0393385	1088	-0.0264142	6982	506	372	0.503262	0.298205	-0.298205	6982	0.588595	chr12	126345899	126346531	7505364	TRUE	TRUE
chr12_126675561_126676195	0.314164	0.380899	0.0667345	12911	0.0823558	10162.5	506	372	0.0368635	1.4334	1.4334	10162.5	0.0669334	chr12	126675561	126676195	7175700	TRUE	TRUE
chr12_12764751_12765205	0.0228735	0.0223799	-0.000493592	5755	-0.0847571	3980.5	506	372	0.0317029	1.4989	-1.4989	3980.5	0.058624	chr12	12764751	12765205	12764751	FALSE	FALSE
chr12_128245592_128245836	0.772389	0.702648	-0.0697417	595	-0.0609248	5173.5	506	372	0.122569	0.911618	-0.911618	5173.5	0.185214	chr12	128245592	128245836	5606059	TRUE	TRUE
chr12_12849067_12849270	0.030397	0.0310197	0.000622701	9075	0.0827383	10173	506	372	0.0359964	1.44374	1.44374	10173	0.0656052	chr12	12849067	12849270	12849067	FALSE	FALSE
chr12_12869798_12871248	0.0438608	0.0438755	1.46925e-05	7732	-0.0510221	5720.5	506	372	0.195982	0.707783	-0.707783	5721	0.273005	chr12	12869798	12871248	12869798	FALSE	FALSE
chr12_128751041_128753151	0.254008	0.133673	-0.120335	239	-0.306632	400	506	372	7.73611e-15	14.1115	-14.1115	400	1.32492e-13	chr12	128751041	128753151	5098744	TRUE	TRUE
chr12_12876630_12879002	0.0446517	0.0453588	0.000707086	9157	0.0875834	10258	506	372	0.0264342	1.57783	1.57783	10258	0.0502673	chr12	12876630	12879002	12876630	FALSE	FALSE
chr12_129280256_129280486	0.866903	0.87152	0.00461698	10651	0.0422776	9348	506	372	0.283971	0.546727	0.546727	9348	0.370862	chr12	129280256	129280486	4571409	TRUE	FALSE
chr12_129307947_129308724	0.0371045	0.0368853	-0.000219181	6824	-0.0251073	7047.5	506	372	0.52462	0.280155	-0.280155	7046	0.608582	chr12	129307947	129308724	4543171	TRUE	FALSE
chr12_129329287_129331491	0.807589	0.81631	0.00872117	11150	0.059926	9734	506	372	0.128822	0.89001	0.89001	9734	0.193048	chr12	129329287	129331491	4520404	TRUE	TRUE
chr12_129337870_129338653	0.305571	0.252027	-0.0535446	834	-0.138382	2204	506	372	0.00045262	3.34427	-3.34427	2204	0.00134999	chr12	129337870	129338653	4513242	TRUE	TRUE
chr12_12966123_12966349	0.0173922	0.0175347	0.000142513	8156	-0.0355944	6505	506	372	0.367032	0.435297	-0.435297	6505	0.457759	chr12	12966123	12966349	12966123	FALSE	FALSE
chr12_130387609_130389139	0.28767	0.128286	-0.159384	128	-0.412693	75	506	372	1.31769e-25	24.8802	-24.8802	75	1.21779e-23	chr12	130387609	130389139	3462756	TRUE	TRUE
chr12_13044042_13044667	0.050894	0.0516002	0.000706188	9156	0.0396001	9289.5	506	372	0.315583	0.500887	0.500887	9289.5	0.404542	chr12	13044042	13044667	13044042	FALSE	FALSE
chr12_130526915_130527117	0.105364	0.0726485	-0.0327156	1240	-0.169472	1634	506	372	1.74434e-05	4.75837	-4.75837	1634	6.74773e-05	chr12	130526915	130527117	3324778	TRUE	FALSE
chr12_130645327_130648988	0.198737	0.174553	-0.0241841	1539	-0.110789	2969.5	506	372	0.00498593	2.30225	-2.30225	2968.5	0.0116597	chr12	130645327	130648988	3202907	TRUE	TRUE
chr12_130953626_130953829	0.904656	0.882357	-0.0222992	1606	-0.043202	6122	506	372	0.273573	0.562927	-0.562927	6122	0.359954	chr12	130953626	130953829	2898066	TRUE	TRUE
chr12_131303093_131303836	0.209166	0.497163	0.287997	13519	0.415657	13481	506	372	5.94573e-26	25.2258	25.2258	13481	5.96643e-24	chr12	131303093	131303836	2548059	TRUE	FALSE
chr12_131323203_131323959	0.0291367	0.0289018	-0.000234837	6776	-0.0846934	3982.5	506	372	0.0318315	1.49714	-1.49714	3982.5	0.0588376	chr12	131323203	131323959	2527936	TRUE	FALSE
chr12_131356094_131357228	0.0293671	0.0310484	0.00168128	9825	0.198463	12101	506	372	4.90129e-07	6.30969	6.30969	12101	2.46465e-06	chr12	131356094	131357228	2494667	TRUE	FALSE
chr12_13153421_13153749	0.0374841	0.0381554	0.000671297	9121	0.118216	10839	506	372	0.00273378	2.56324	2.56324	10839	0.00679658	chr12	13153421	13153749	13153421	FALSE	FALSE
chr12_13154088_13154866	0.108069	0.125192	0.0171231	11710	0.132496	11098	506	372	0.000784695	3.1053	3.1053	11098	0.00221464	chr12	13154088	13154866	13154088	FALSE	FALSE
chr12_132195034_132196454	0.0486023	0.0468493	-0.00175301	3634	-0.164892	1691	506	372	2.92462e-05	4.53393	-4.53393	1691	0.000109296	chr12	132195034	132196454	1655441	TRUE	FALSE
chr12_132312439_132315739	0.0800975	0.0834287	0.0033312	10399	0.0569722	9664	506	372	0.148768	0.827489	0.827489	9664	0.217033	chr12	132312439	132315739	1536156	TRUE	FALSE
chr12_132329177_132330089	0.804511	0.820938	0.0164272	11672	0.147106	11352.5	506	372	0.000192672	3.71518	3.71518	11352.5	0.000621458	chr12	132329177	132330089	1521806	TRUE	TRUE
chr12_132413338_132414801	0.0343684	0.0349772	0.000608858	9059	0.0510009	9542	506	372	0.196169	0.70737	0.70737	9543	0.273208	chr12	132413338	132414801	1437094	TRUE	FALSE
chr12_132514283_132514525	0.897305	0.910248	0.0129431	11461	0.310702	13178	506	372	3.40815e-15	14.4675	14.4675	13178	6.0991e-14	chr12	132514283	132514525	1337370	TRUE	FALSE
chr12_13254049_13254631	0.0517516	0.0564414	0.00468976	10666	0.218188	12347.5	506	372	3.20034e-08	7.4948	7.4948	12347.5	1.94679e-07	chr12	13254049	13254631	13254049	FALSE	FALSE
chr12_132568607_132569715	0.0263307	0.0258464	-0.000484316	5782	-0.047569	5899.5	506	372	0.227988	0.642088	-0.642088	5899.5	0.309816	chr12	132568607	132569715	1282180	TRUE	FALSE
chr12_132627866_132629469	0.0320256	0.0327081	0.000682496	9130	0.0840983	10190	506	372	0.033053	1.48079	1.48079	10190	0.0608134	chr12	132627866	132629469	1222426	TRUE	FALSE
chr12_132663322_132663748	0.400026	0.529547	0.12952	13328	0.311615	13185	506	372	2.8311e-15	14.548	14.548	13185	5.13425e-14	chr12	132663322	132663748	1188147	TRUE	TRUE
chr12_132900224_132901089	0.680124	0.653795	-0.0263295	1449	0.0191253	8746	506	372	0.627946	0.202078	0.202078	8746	0.699916	chr12	132900224	132901089	950806	TRUE	TRUE
chr12_132905449_132906206	0.205734	0.124128	-0.081606	493	-0.26325	654	506	372	2.51922e-11	10.5987	-10.5987	654	2.52612e-10	chr12	132905449	132906206	945689	TRUE	FALSE
chr12_133049412_133051162	0.708375	0.81769	0.109315	13243	0.240299	12630	506	372	1.12532e-09	8.94872	8.94872	12630	8.74624e-09	chr12	133049412	133051162	800733	TRUE	TRUE
chr12_133065843_133066393	0.0270193	0.0494659	0.0224466	11949	0.13698	11194	506	372	0.000517009	3.2865	3.2865	11194	0.00152524	chr12	133065843	133066393	785502	TRUE	FALSE
chr12_133146517_133148261	0.946159	0.946936	0.000776887	9254	0.0355784	9190	506	372	0.367246	0.435043	0.435043	9190	0.457984	chr12	133146517	133148261	703634	TRUE	TRUE
chr12_133159225_133160576	0.874532	0.893131	0.0185996	11778	0.227156	12477	506	372	8.54174e-09	8.06845	8.06845	12477	5.70868e-08	chr12	133159225	133160576	691319	TRUE	TRUE
chr12_133194868_133195544	0.113731	0.0877183	-0.026013	1460	-0.0915572	3712	506	372	0.0203142	1.6922	-1.6922	3712	0.0397396	chr12	133194868	133195544	656351	TRUE	TRUE
chr12_133263462_133264711	0.0313874	0.0306466	-0.000740753	5029	-0.0919291	3691	506	372	0.0198104	1.70311	-1.70311	3691	0.038934	chr12	133263462	133264711	587184	TRUE	FALSE
chr12_133286760_133287992	0.021998	0.021059	-0.000939021	4604	-0.161428	1744	506	372	4.28659e-05	4.36789	-4.36789	1744	0.000155768	chr12	133286760	133287992	563903	TRUE	FALSE
chr12_133404789_133405985	0.0359007	0.0356094	-0.000291232	6534	-0.0319977	6694	506	372	0.417431	0.379416	-0.379416	6694	0.507396	chr12	133404789	133405985	445910	TRUE	FALSE
chr12_133417238_133417472	0.907314	0.907441	0.000127256	8103	0.027498	8972.5	506	372	0.485906	0.313448	0.313448	8973	0.572696	chr12	133417238	133417472	434423	TRUE	FALSE
chr12_133429925_133430579	0.909547	0.914086	0.00453883	10640	0.112818	10747	506	372	0.00424471	2.37215	2.37215	10747	0.0100724	chr12	133429925	133430579	421316	TRUE	FALSE
chr12_133463807_133464858	0.0282442	0.0275781	-0.000666147	5203	-0.150771	1926	506	372	0.000132724	3.87705	-3.87705	1926	0.000442534	chr12	133463807	133464858	387037	TRUE	FALSE
chr12_133484658_133485739	0.102512	0.056484	-0.0460276	972	-0.12406	2568	506	372	0.00166481	2.77864	-2.77864	2568	0.00435809	chr12	133484658	133485739	366156	TRUE	TRUE
chr12_133562710_133563453	0.0302344	0.0300715	-0.000162866	7058	-0.0592992	5263	506	372	0.132872	0.876568	-0.876568	5263	0.198086	chr12	133562710	133563453	288442	TRUE	FALSE
chr12_133613765_133614525	0.0316631	0.0317945	0.000131469	8121	-0.0182328	7389	506	372	0.644083	0.191058	-0.191058	7389	0.714376	chr12	133613765	133614525	237370	TRUE	FALSE
chr12_133656704_133657813	0.0437331	0.0425887	-0.00114433	4271	-0.0931404	3649.5	506	372	0.0182444	1.73887	-1.73887	3648.5	0.0361711	chr12	133656704	133657813	194082	TRUE	FALSE
chr12_133706528_133707594	0.0605301	0.0588847	-0.0016454	3714	-0.120171	2679	506	372	0.00232108	2.63431	-2.63431	2678	0.00586855	chr12	133706528	133707594	144301	TRUE	FALSE
chr12_14134626_14135242	0.315363	0.247975	-0.0673883	620	-0.212376	1096	506	372	7.33376e-08	7.13467	-7.13467	1096	4.20086e-07	chr12	14134626	14135242	14134626	FALSE	TRUE
chr12_14518525_14518975	0.0666746	0.0667686	9.40412e-05	8008	-0.00499384	7932	506	372	0.899384	0.0460551	-0.0460551	7932	0.924147	chr12	14518525	14518975	14518525	FALSE	FALSE
chr12_14720248_14721093	0.193837	0.296145	0.102308	13211	0.280792	12987	506	372	1.10405e-12	11.957	11.957	12987	1.37594e-11	chr12	14720248	14721093	14720248	FALSE	TRUE
chr12_14922877_14923974	0.0388648	0.0412486	0.00238381	10100	0.201592	12137	506	372	3.23101e-07	6.49066	6.49066	12137	1.67063e-06	chr12	14922877	14923974	14922877	FALSE	FALSE
chr12_14927291_14928023	0.0409986	0.0462151	0.00521658	10763	0.241213	12648	506	372	9.73482e-10	9.01167	9.01167	12648	7.68518e-09	chr12	14927291	14928023	14927291	FALSE	FALSE
chr12_14955991_14956471	0.0337916	0.0335806	-0.000211053	6870	-0.0605795	5190	506	372	0.124704	0.90412	-0.90412	5190	0.187874	chr12	14955991	14956471	14955991	FALSE	FALSE
chr12_15373986_15374514	0.0664161	0.0922264	0.0258103	12070	0.135407	11163	506	372	0.000599306	3.22235	3.22235	11163	0.00174111	chr12	15373986	15374514	15373986	FALSE	FALSE
chr12_15475318_15475901	0.0882996	0.0468557	-0.0414439	1046	-0.366155	179	506	372	1.68697e-20	19.7729	-19.7729	179	6.86287e-19	chr12	15475318	15475901	15475318	FALSE	TRUE
chr12_15941718_15942740	0.0548621	0.0525385	-0.00232362	3349	-0.177897	1507	506	372	6.51673e-06	5.18597	-5.18597	1507	2.72056e-05	chr12	15941718	15942740	15941718	FALSE	FALSE
chr12_16034931_16035836	0.0440391	0.0429287	-0.00111032	4320	-0.0707637	4669	506	372	0.0728998	1.13727	-1.13727	4669	0.119243	chr12	16034931	16035836	16034931	FALSE	FALSE
chr12_16064080_16064534	0.0190435	0.0189086	-0.000134964	7169	-0.018711	7372	506	372	0.635417	0.196942	-0.196942	7372	0.706383	chr12	16064080	16064534	16064080	FALSE	FALSE
chr12_1639033_1640750	0.0439058	0.131138	0.0872325	13100	0.354594	13357	506	372	2.52951e-19	18.597	18.597	13357	8.5883e-18	chr12	1639033	1640750	1639033	TRUE	TRUE
chr12_1702638_1704232	0.0316207	0.0313512	-0.000269506	6630	-0.037305	6429	506	372	0.344452	0.462872	-0.462872	6429	0.434558	chr12	1702638	1704232	1702638	TRUE	FALSE
chr12_1770701_1771476	0.0963876	0.0994454	0.00305782	10308	-0.0507246	5735	506	372	0.198603	0.702015	-0.702015	5735	0.276087	chr12	1770701	1771476	1770701	TRUE	FALSE
chr12_1799874_1800739	0.0212959	0.0211851	-0.00011079	7255	-0.0487271	5829	506	372	0.216863	0.663814	-0.663814	5829	0.297323	chr12	1799874	1800739	1799874	TRUE	FALSE
chr12_19282641_19283901	0.0514621	0.0491063	-0.00235577	3333	-0.153874	1868	506	372	9.61984e-05	4.01683	-4.01683	1868	0.000329174	chr12	19282641	19283901	19282641	FALSE	FALSE
chr12_19592183_19593685	0.0766216	0.0681086	-0.00851298	2360	-0.130743	2391	506	372	0.000920696	3.03588	-3.03588	2390	0.00256218	chr12	19592183	19593685	19592183	FALSE	FALSE
chr12_1973739_1974958	0.573706	0.590779	0.0170731	11707	0.0554847	9635	506	372	0.159667	0.796785	0.796785	9635	0.229765	chr12	1973739	1974958	1973739	TRUE	TRUE
chr12_2017133_2018161	0.720122	0.781609	0.0614879	12860	0.2953	13085	506	372	7.17591e-14	13.1441	13.1441	13085	1.06475e-12	chr12	2017133	2018161	2017133	TRUE	TRUE
chr12_20521616_20523122	0.0949937	0.0659989	-0.0289948	1356	-0.225647	970	506	372	1.07051e-08	7.97041	-7.97041	970	7.04672e-08	chr12	20521616	20523122	20521616	FALSE	TRUE
chr12_20704525_20706004	0.875096	0.911602	0.0365061	12422	0.263845	12855.5	506	372	2.27287e-11	10.6434	10.6434	12856	2.30124e-10	chr12	20704525	20706004	20704525	FALSE	TRUE
chr12_2113343_2113881	0.0389925	0.0356235	-0.00336908	3018	-0.206341	1166	506	372	1.69667e-07	6.7704	-6.7704	1166	9.14634e-07	chr12	2113343	2113881	2113343	TRUE	FALSE
chr12_21590469_21590785	0.121474	0.122163	0.000688754	9135	-0.0190403	7359.5	506	372	0.629475	0.201021	-0.201021	7360	0.700987	chr12	21590469	21590785	21590469	FALSE	FALSE
chr12_21654396_21654956	0.057057	0.0553148	-0.00174222	3640	-0.127513	2468.5	506	372	0.00122999	2.9101	-2.9101	2467.5	0.00332059	chr12	21654396	21654956	21654396	FALSE	FALSE
chr12_22093954_22095357	0.305752	0.197026	-0.108726	300	-0.215458	1065	506	372	4.73739e-08	7.32446	-7.32446	1065	2.79884e-07	chr12	22093954	22095357	22093954	FALSE	TRUE
chr12_22199062_22199589	0.0509481	0.0515651	0.000616945	9069	0.0426495	9356	506	372	0.279756	0.553221	0.553221	9356	0.366346	chr12	22199062	22199589	22199062	FALSE	FALSE
chr12_22486835_22488666	0.0765689	0.048935	-0.0276339	1401	-0.285871	493	506	372	4.30528e-13	12.366	-12.366	493	5.78033e-12	chr12	22486835	22488666	22486835	FALSE	TRUE
chr12_22696780_22697728	0.0506323	0.0492502	-0.00138212	3994	-0.163745	1707	506	372	3.32224e-05	4.47857	-4.47857	1707	0.000123103	chr12	22696780	22697728	22696780	FALSE	FALSE
chr12_22777988_22778301	0.0259954	0.0252362	-0.000759199	4977	-0.0573441	5381	506	372	0.146135	0.835247	-0.835247	5381	0.213858	chr12	22777988	22778301	22777988	FALSE	FALSE
chr12_24714956_24716243	0.0570075	0.0537387	-0.00326876	3042	-0.207361	1153.5	506	372	1.47476e-07	6.83128	-6.83128	1153.5	8.0171e-07	chr12	24714956	24716243	24714956	FALSE	FALSE
chr12_25055599_25056246	0.410558	0.28596	-0.124597	223	-0.187609	1386	506	372	1.98408e-06	5.70244	-5.70244	1386	9.03474e-06	chr12	25055599	25056246	25055599	FALSE	TRUE
chr12_25348039_25348399	0.048205	0.0501192	0.00191422	9943	0.0627098	9797	506	372	0.111988	0.95083	0.95083	9798	0.171812	chr12	25348039	25348399	25348039	FALSE	FALSE
chr12_26267058_26267519	0.022295	0.0219725	-0.000322562	6414	-0.0490618	5809	506	372	0.213722	0.670151	-0.670151	5809	0.2937	chr12	26267058	26267519	26267058	FALSE	FALSE
chr12_26278540_26279707	0.0233435	0.0229386	-0.000404872	6087	-0.0877747	3828	506	372	0.0261068	1.58325	-1.58325	3827	0.0497284	chr12	26278540	26279707	26278540	FALSE	FALSE
chr12_26348260_26349130	0.0385131	0.0360512	-0.00246184	3298	-0.0917007	3704	506	372	0.0201186	1.6964	-1.6964	3704	0.0394195	chr12	26348260	26349130	26348260	FALSE	FALSE
chr12_26985453_26986304	0.0579024	0.0569247	-0.00097774	4518	-0.0661205	4907	506	372	0.0937833	1.02787	-1.02787	4907	0.147937	chr12	26985453	26986304	26985453	FALSE	FALSE
chr12_27091158_27091857	0.0553953	0.0548328	-0.000562575	5512	-0.0598623	5229	506	372	0.129229	0.888638	-0.888638	5229	0.193551	chr12	27091158	27091857	27091158	FALSE	FALSE
chr12_27166996_27167464	0.0855666	0.0841957	-0.00137085	4007	-0.0735263	4521	506	372	0.0623951	1.20485	-1.20485	4521	0.104522	chr12	27166996	27167464	27166996	FALSE	FALSE
chr12_27175342_27175843	0.0266068	0.0264522	-0.00015459	7101	-0.0408857	6246.5	506	372	0.300126	0.522696	-0.522696	6246.5	0.38807	chr12	27175342	27175843	27175342	FALSE	FALSE
chr12_27396982_27397646	0.0399921	0.0419273	0.00193517	9953	0.103904	10578	506	372	0.00845274	2.073	2.073	10578	0.0184573	chr12	27396982	27397646	27396982	FALSE	FALSE
chr12_27863633_27864081	0.0213878	0.0211497	-0.000238132	6757	-0.0557291	5482	506	372	0.157836	0.801793	-0.801793	5482	0.227711	chr12	27863633	27864081	27863633	FALSE	FALSE
chr12_2788614_2788879	0.934172	0.92898	-0.00519186	2695	-0.037645	6411	506	372	0.340071	0.46843	-0.46843	6411	0.430033	chr12	2788614	2788879	2788614	TRUE	TRUE
chr12_2800139_2801062	0.268254	0.276474	0.0082202	11094	0.0435526	9387	506	372	0.269698	0.569123	0.569123	9387	0.355962	chr12	2800139	2801062	2800139	TRUE	TRUE
chr12_28123023_28123773	0.0511824	0.0598673	0.00868495	11143	0.111033	10728	506	372	0.00489086	2.31061	2.31061	10728	0.0114611	chr12	28123023	28123773	28123023	FALSE	FALSE
chr12_2861782_2862472	0.228261	0.228807	0.000546157	8969	0.0578648	9687	506	372	0.142507	0.846163	0.846163	9687	0.209865	chr12	2861782	2862472	2861782	TRUE	TRUE
chr12_2903389_2905189	0.0884858	0.109974	0.0214877	11905	0.188427	11969	506	372	1.79016e-06	5.74711	5.74711	11969	8.2152e-06	chr12	2903389	2905189	2903389	TRUE	FALSE
chr12_2921849_2922127	0.0234652	0.0232325	-0.000232637	6780	-0.0320668	6692.5	506	372	0.416426	0.380462	-0.380462	6692	0.506357	chr12	2921849	2922127	2921849	TRUE	FALSE
chr12_29302034_29302954	0.0711112	0.0843225	0.0132113	11479	0.133394	11116	506	372	0.000722503	3.14116	3.14116	11116	0.00205712	chr12	29302034	29302954	29302034	FALSE	TRUE
chr12_2985978_2986639	0.032449	0.0326613	0.000212293	8358	0.00664074	8345	506	372	0.866439	0.0622618	0.0622618	8345	0.898473	chr12	2985978	2986639	2985978	TRUE	FALSE
chr12_29935995_29937433	0.119932	0.103661	-0.016271	1861	-0.193262	1308	506	372	9.6664e-07	6.01474	-6.01474	1308	4.63543e-06	chr12	29935995	29937433	29935995	FALSE	FALSE
chr12_2999665_3000638	0.0280379	0.0269884	-0.00104946	4409	-0.12373	2582.5	506	372	0.00171293	2.76626	-2.76626	2582.5	0.00446682	chr12	2999665	3000638	2999665	TRUE	FALSE
chr12_3067960_3069444	0.0387889	0.0416153	0.00282637	10243	0.199668	12116	506	372	4.17712e-07	6.37912	6.37912	12116	2.12256e-06	chr12	3067960	3069444	3067960	TRUE	FALSE
chr12_30848264_30849016	0.041566	0.0413491	-0.000216842	6842	-0.0659983	4912	506	372	0.0943917	1.02507	-1.02507	4912	0.148758	chr12	30848264	30849016	30848264	FALSE	FALSE
chr12_30907359_30908245	0.0221536	0.0219476	-0.000206042	6890	-0.0611054	5165	506	372	0.121464	0.915551	-0.915551	5165	0.183791	chr12	30907359	30908245	30907359	FALSE	FALSE
chr12_30948548_30949757	0.106033	0.178926	0.0728927	12969	0.140561	11252	506	372	0.00036728	3.435	3.435	11252	0.00111936	chr12	30948548	30949757	30948548	FALSE	FALSE
chr12_30975385_30976292	0.433648	0.550387	0.116739	13281	0.201454	12131	506	372	3.29141e-07	6.48262	6.48262	12131	1.69797e-06	chr12	30975385	30976292	30975385	FALSE	TRUE
chr12_31226343_31227186	0.0517413	0.0515134	-0.000227969	6796	-0.0539866	5577	506	372	0.171243	0.766387	-0.766387	5577	0.243782	chr12	31226343	31227186	31226343	FALSE	FALSE
chr12_31476717_31479466	0.0422263	0.0416548	-0.000571474	5483	-0.056271	5452	506	372	0.153833	0.812949	-0.812949	5452	0.222838	chr12	31476717	31479466	31476717	FALSE	FALSE
chr12_31742760_31744324	0.0665476	0.0638034	-0.00274417	3192	-0.131577	2371	506	372	0.000853477	3.06881	-3.06881	2369	0.00239083	chr12	31742760	31744324	31742760	FALSE	FALSE
chr12_3186011_3186968	0.0268796	0.0258031	-0.0010765	4372	-0.142898	2101	506	372	0.000292571	3.53377	-3.53377	2101	0.000907594	chr12	3186011	3186968	3186011	TRUE	FALSE
chr12_31881630_31882461	0.0518299	0.0492467	-0.00258319	3258	-0.139254	2177	506	372	0.000416475	3.38041	-3.38041	2177	0.00125517	chr12	31881630	31882461	31881630	FALSE	FALSE
chr12_32112161_32112833	0.048187	0.0487337	0.000546739	8970	0.0224935	8843.5	506	372	0.568684	0.245129	0.245129	8843.5	0.648591	chr12	32112161	32112833	32112161	FALSE	FALSE
chr12_32259249_32260165	0.0487463	0.0680018	0.0192555	11815	0.250914	12731	506	372	2.0231e-10	9.69398	9.69398	12731	1.7479e-09	chr12	32259249	32260165	32259249	FALSE	FALSE
chr12_32552025_32553038	0.0595203	0.069994	0.0104737	11285	0.244836	12688.5	506	372	5.4512e-10	9.26351	9.26351	12688	4.4892e-09	chr12	32552025	32553038	32552025	FALSE	FALSE
chr12_32832130_32832978	0.0301649	0.0289527	-0.00121222	4180	-0.115177	2834	506	372	0.0035097	2.45473	-2.45473	2833	0.00848731	chr12	32832130	32832978	32832130	FALSE	FALSE
chr12_32908374_32908981	0.0427633	0.0423246	-0.00043875	5966	-0.0562816	5450	506	372	0.153756	0.813169	-0.813169	5450	0.222797	chr12	32908374	32908981	32908374	FALSE	FALSE
chr12_33049301_33050098	0.224271	0.226456	0.00218502	10035	0.0912172	10329	506	372	0.0207845	1.68226	1.68226	10329	0.0405659	chr12	33049301	33050098	33049301	FALSE	FALSE
chr12_3308812_3310270	0.110168	0.0690869	-0.0410809	1049	-0.157465	1804	506	372	6.5792e-05	4.18183	-4.18183	1804	0.000231864	chr12	3308812	3310270	3308812	TRUE	FALSE
chr12_33591763_33593050	0.156218	0.115643	-0.0405755	1061	-0.178918	1500	506	372	5.76732e-06	5.23903	-5.23903	1500	2.42338e-05	chr12	33591763	33593050	33591763	FALSE	TRUE
chr12_34319681_34319984	0.895484	0.883409	-0.0120749	2094	-0.106231	3133	506	372	0.00709381	2.14912	-2.14912	3132	0.0158869	chr12	34319681	34319984	34319681	FALSE	TRUE
chr12_34493973_34496968	0.529962	0.526976	-0.00298584	3111	-0.0672574	4846	506	372	0.0882717	1.05418	-1.05418	4846	0.140552	chr12	34493973	34496968	34493973	FALSE	FALSE
chr12_3475010_3475654	0.0856809	0.0886232	0.00294233	10277	0.0515853	9554	506	372	0.191092	0.718758	0.718758	9555	0.267209	chr12	3475010	3475654	3475010	TRUE	FALSE
chr12_3599966_3603008	0.125292	0.0653822	-0.0599096	735	-0.436068	44	506	372	2.13099e-28	27.6714	-27.6714	44	3.43672e-26	chr12	3599966	3603008	3599966	TRUE	TRUE
chr12_3862068_3862606	0.117443	0.350205	0.232762	13483	0.270337	12909	506	372	7.28898e-12	11.1373	11.1373	12909	7.95038e-11	chr12	3862068	3862606	3862068	TRUE	TRUE
chr12_38710392_38710643	0.0426823	0.0397878	-0.00289445	3144	-0.138308	2207	506	372	0.000455837	3.34119	-3.34119	2207.5	0.00135839	chr12	38710392	38710643	38710392	FALSE	FALSE
chr12_39299248_39299629	0.0752034	0.0809603	0.00575693	10841	0.152843	11445	506	372	0.000107124	3.97011	3.97011	11445	0.000364533	chr12	39299248	39299629	39299248	FALSE	FALSE
chr12_39538383_39539500	0.477668	0.512291	0.0346228	12365	0.0752051	10010	506	372	0.0566465	1.24683	1.24683	10010	0.0964422	chr12	39538383	39539500	39538383	FALSE	TRUE
chr12_39836211_39837499	0.0402669	0.0392024	-0.00106457	4390	-0.119873	2688	506	372	0.00237996	2.62343	-2.62343	2687	0.00600286	chr12	39836211	39837499	39836211	FALSE	FALSE
chr12_40498962_40500017	0.0641338	0.0636001	-0.000533707	5619	-0.00676824	7854	506	372	0.863898	0.0635377	-0.0635377	7854	0.896661	chr12	40498962	40500017	40498962	FALSE	FALSE
chr12_41086522_41087102	0.202594	0.124273	-0.0783204	509	-0.263165	656	506	372	2.55648e-11	10.5924	-10.5924	656	2.55592e-10	chr12	41086522	41087102	41086522	FALSE	TRUE
chr12_4140520_4141052	0.299609	0.385292	0.0856835	13085	0.295784	13089	506	372	6.53623e-14	13.1847	13.1847	13089	9.77332e-13	chr12	4140520	4141052	4140520	TRUE	TRUE
chr12_42538125_42538902	0.0193969	0.0193331	-6.38179e-05	7434	-0.0503687	5750	506	372	0.201772	0.69514	-0.69514	5750	0.279918	chr12	42538125	42538902	42538125	FALSE	FALSE
chr12_42631224_42632619	0.0367138	0.0372898	0.000575993	9009	0.00803264	8392	506	372	0.838774	0.0763552	0.0763552	8392	0.876021	chr12	42631224	42632619	42631224	FALSE	FALSE
chr12_42719761_42720119	0.0360444	0.035539	-0.000505421	5725	-0.0620936	5113	506	372	0.115556	0.937206	-0.937206	5113	0.176249	chr12	42719761	42720119	42719761	FALSE	FALSE
chr12_42876654_42878193	0.0432896	0.0431926	-9.69432e-05	7326	-0.0386332	6353.5	506	372	0.327546	0.484728	-0.484728	6353.5	0.417546	chr12	42876654	42878193	42876654	FALSE	FALSE
chr12_42984087_42984380	0.0526215	0.065627	0.0130055	11465	0.140975	11259	506	372	0.000352853	3.45241	3.45241	11259	0.00107927	chr12	42984087	42984380	42984087	FALSE	TRUE
chr12_4378366_4382222	0.0730164	0.0964445	0.0234282	11990	0.144226	11303	506	372	0.000256727	3.59053	3.59053	11303	0.000805812	chr12	4378366	4382222	4378366	TRUE	TRUE
chr12_4383193_4384405	0.0513398	0.051558	0.000218228	8372	-0.0265205	6972	506	372	0.501547	0.299689	-0.299689	6972	0.587349	chr12	4383193	4384405	4383193	TRUE	TRUE
chr12_43944719_43946285	0.465773	0.256426	-0.209347	58	-0.283129	511	506	372	7.17182e-13	12.1444	-12.1444	511	9.29728e-12	chr12	43944719	43946285	43944719	FALSE	TRUE
chr12_44152506_44152922	0.0341975	0.0336066	-0.000590913	5424	-0.0590867	5274	506	372	0.134266	0.872033	-0.872033	5274	0.19977	chr12	44152506	44152922	44152506	FALSE	FALSE
chr12_44199630_44200405	0.045382	0.0449992	-0.000382766	6170	-0.0385694	6361	506	372	0.328345	0.48367	-0.48367	6360	0.418171	chr12	44199630	44200405	44199630	FALSE	FALSE
chr12_44229710_44230164	0.0263882	0.0265814	0.000193225	8304	0.00684262	8350	506	372	0.862416	0.0642833	0.0642833	8350	0.895466	chr12	44229710	44230164	44229710	FALSE	FALSE
chr12_4479522_4479973	0.835743	0.853027	0.0172849	11716	0.0984848	10469	506	372	0.0125573	1.9011	1.9011	10469	0.0261112	chr12	4479522	4479973	4479522	TRUE	TRUE
chr12_45269830_45270835	0.0586416	0.0517246	-0.00691699	2507	-0.184389	1428	506	372	2.96198e-06	5.52842	-5.52842	1428	1.31045e-05	chr12	45269830	45270835	45269830	FALSE	TRUE
chr12_45444202_45445386	0.110789	0.0729423	-0.037847	1114	-0.297622	436	506	372	4.5768e-14	13.3394	-13.3394	436	7.01379e-13	chr12	45444202	45445386	45444202	FALSE	TRUE
chr12_45609713_45610752	0.027899	0.0278702	-2.88058e-05	7559	-0.0189075	7366	506	372	0.631868	0.199374	-0.199374	7366	0.703073	chr12	45609713	45610752	45609713	FALSE	FALSE
chr12_46120726_46124104	0.0584272	0.0571897	-0.00123745	4151	-0.11438	2859	506	372	0.00374394	2.42667	-2.42667	2858.5	0.00899435	chr12	46120726	46124104	46120726	FALSE	FALSE
chr12_46383561_46384756	0.033278	0.0322767	-0.0010013	4481	-0.0663012	4900	506	372	0.0928896	1.03203	-1.03203	4900	0.146698	chr12	46383561	46384756	46383561	FALSE	FALSE
chr12_4647844_4648053	0.0504287	0.0490003	-0.00142845	3945	-0.125473	2529	506	372	0.00147212	2.83206	-2.83206	2528	0.00390575	chr12	4647844	4648053	4647844	TRUE	FALSE
chr12_46661054_46663408	0.0447265	0.0599794	0.0152529	11605	0.244533	12680	506	372	5.7237e-10	9.24232	9.24232	12680	4.67666e-09	chr12	46661054	46663408	46661054	FALSE	FALSE
chr12_46765134_46766633	0.0413328	0.0404833	-0.000849418	4769	-0.0965033	3522	506	372	0.0144509	1.84011	-1.84011	3520	0.0295228	chr12	46765134	46766633	46765134	FALSE	FALSE
chr12_47224912_47225664	0.141796	0.113268	-0.0285278	1371	-0.0967529	3511	506	372	0.0141992	1.84774	-1.84774	3509	0.0291052	chr12	47224912	47225664	47224912	FALSE	TRUE
chr12_47473177_47474120	0.0446322	0.0574856	0.0128535	11454	0.257416	12801	506	372	6.82773e-11	10.1657	10.1657	12801	6.43222e-10	chr12	47473177	47474120	47473177	FALSE	FALSE
chr12_4758177_4758431	0.034896	0.0352861	0.00039006	8720	-0.0192422	7344	506	372	0.625846	0.203533	-0.203533	7344	0.69838	chr12	4758177	4758431	4758177	TRUE	FALSE
chr12_48099317_48099905	0.0333909	0.0337661	0.000375234	8702	0.0300693	9044	506	372	0.446056	0.350611	0.350611	9044	0.534092	chr12	48099317	48099905	48099317	FALSE	FALSE
chr12_48152554_48153146	0.025956	0.025026	-0.000929985	4626	-0.123135	2600	506	372	0.00180313	2.74397	-2.74397	2600	0.00467592	chr12	48152554	48153146	48152554	FALSE	FALSE
chr12_48166997_48167578	0.0359932	0.0358666	-0.000126552	7198	-0.0183709	7383	506	372	0.641574	0.192753	-0.192753	7383	0.712118	chr12	48166997	48167578	48166997	FALSE	FALSE
chr12_48206721_48207126	0.0362009	0.122884	0.0866831	13095	0.369427	13405	506	372	7.71823e-21	20.1125	20.1125	13405	3.46221e-19	chr12	48206721	48207126	48206721	FALSE	FALSE
chr12_48213109_48214188	0.0446335	0.0442431	-0.000390325	6138	-0.0162725	7470	506	372	0.680112	0.16742	-0.16742	7470	0.745608	chr12	48213109	48214188	48213109	FALSE	FALSE
chr12_48298645_48299537	0.0421331	0.0544938	0.0123607	11415	0.313475	13192	506	372	1.93779e-15	14.7127	14.7127	13192	3.60594e-14	chr12	48298645	48299537	48298645	FALSE	FALSE
chr12_48357195_48357507	0.0319261	0.030662	-0.00126405	4120	-0.0857984	3922	506	372	0.0296655	1.52775	-1.52775	3922.5	0.0554774	chr12	48357195	48357507	48357195	FALSE	FALSE
chr12_48397889_48398731	0.0363954	0.0380247	0.00162937	9804	0.0842365	10197	506	372	0.0327659	1.48458	1.48458	10197	0.0604	chr12	48397889	48398731	48397889	FALSE	FALSE
chr12_48499463_48500232	0.0359788	0.0354275	-0.000551302	5556	-0.061828	5127	506	372	0.117122	0.931362	-0.931362	5127	0.178255	chr12	48499463	48500232	48499463	FALSE	FALSE
chr12_48550824_48551518	0.0380074	0.037436	-0.000571404	5484	-0.0978048	3466.5	506	372	0.0131808	1.88006	-1.88006	3464	0.0272569	chr12	48550824	48551518	48550824	FALSE	FALSE
chr12_48577361_48578574	0.146305	0.141737	-0.00456801	2798	-0.135567	2276	506	372	0.000590441	3.22882	-3.22882	2275	0.00171867	chr12	48577361	48578574	48577361	FALSE	TRUE
chr12_48591977_48592785	0.196014	0.282515	0.086501	13092	0.139031	11223.5	506	372	0.000425466	3.37114	3.37114	11223.5	0.00127857	chr12	48591977	48592785	48591977	FALSE	TRUE
chr12_49075489_49076301	0.0280059	0.0276913	-0.000314582	6444	-0.0714119	4633	506	372	0.0703136	1.15296	-1.15296	4633	0.115712	chr12	49075489	49076301	49075489	FALSE	FALSE
chr12_49110055_49110881	0.0282228	0.0278747	-0.000348115	6316	-0.042182	6179	506	372	0.285061	0.545062	-0.545062	6179	0.372035	chr12	49110055	49110881	49110055	FALSE	FALSE
chr12_4918273_4919657	0.309548	0.138826	-0.170722	105	-0.331803	291	506	372	4.10642e-17	16.3865	-16.3865	291	9.77675e-16	chr12	4918273	4919657	4918273	TRUE	TRUE
chr12_49208205_49209439	0.0636793	0.0640229	0.000343598	8639	0.073505	9981	506	372	0.0624709	1.20432	1.20432	9981	0.104623	chr12	49208205	49209439	49208205	FALSE	FALSE
chr12_49212162_49212642	0.0502876	0.0495946	-0.000693038	5129	-0.0568766	5407.5	506	372	0.149451	0.8255	-0.8255	5407.5	0.217888	chr12	49212162	49212642	49212162	FALSE	FALSE
chr12_49245656_49246173	0.046536	0.0461645	-0.000371478	6213	-0.0271208	6945	506	372	0.49191	0.308114	-0.308114	6945	0.578062	chr12	49245656	49246173	49245656	FALSE	FALSE
chr12_49318486_49319476	0.0261968	0.0280314	0.00183464	9898	0.108154	10667	506	372	0.0061224	2.21308	2.21308	10667	0.0139724	chr12	49318486	49319476	49318486	FALSE	FALSE
chr12_49350839_49351387	0.0302799	0.030599	0.000319069	8592	0.022791	8854.5	506	372	0.563581	0.249044	0.249044	8854.5	0.644072	chr12	49350839	49351387	49350839	FALSE	FALSE
chr12_49363664_49364443	0.232463	0.251049	0.0185858	11776	0.065738	9855	506	372	0.0956985	1.01909	1.01909	9856	0.150415	chr12	49363664	49364443	49363664	FALSE	FALSE
chr12_49371690_49375550	0.112844	0.119114	0.00626983	10900	0.0059076	8323	506	372	0.88108	0.0549848	0.0549848	8323	0.90927	chr12	49371690	49375550	49371690	FALSE	TRUE
chr12_49390617_49392441	0.204267	0.341877	0.13761	13356	0.208094	12221	506	372	1.33289e-07	6.87521	6.87521	12221	7.31929e-07	chr12	49390617	49392441	49390617	FALSE	FALSE
chr12_49393139_49393361	0.0434207	0.0431631	-0.000257581	6682	-0.0190722	7354	506	372	0.628902	0.201417	-0.201417	7354	0.700751	chr12	49393139	49393361	49393139	FALSE	FALSE
chr12_49463441_49463989	0.0324476	0.0326579	0.000210252	8354	0.011709	8514	506	372	0.766739	0.115352	0.115352	8514	0.818068	chr12	49463441	49463989	49463441	FALSE	FALSE
chr12_49483601_49484255	0.0825462	0.116211	0.0336645	12345	0.0763951	10035	506	372	0.0528443	1.277	1.277	10035	0.0909057	chr12	49483601	49484255	49483601	FALSE	FALSE
chr12_49524072_49525492	0.0315205	0.0310004	-0.000520123	5664	-0.0762357	4368	506	372	0.0533409	1.27294	-1.27294	4368	0.0916202	chr12	49524072	49525492	49524072	FALSE	FALSE
chr12_49582096_49582881	0.0757996	0.0752506	-0.000549026	5570	0.0142696	8593	506	372	0.717691	0.144062	0.144062	8593	0.777494	chr12	49582096	49582881	49582096	FALSE	FALSE
chr12_49658246_49659175	0.0331612	0.0349997	0.00183849	9901	0.241765	12654	506	372	8.91571e-10	9.04984	9.04984	12654	7.07564e-09	chr12	49658246	49659175	49658246	FALSE	FALSE
chr12_49688873_49691360	0.307706	0.405859	0.0981534	13181	0.340027	13299	506	372	6.79768e-18	17.1676	17.1676	13299	1.82715e-16	chr12	49688873	49691360	49688873	FALSE	TRUE
chr12_49716630_49717018	0.0579373	0.0578464	-9.08487e-05	7341	-0.023641	7115	506	372	0.549122	0.260331	-0.260331	7115	0.63133	chr12	49716630	49717018	49716630	FALSE	FALSE
chr12_49726591_49727114	0.571066	0.691942	0.120877	13300	0.207521	12211	506	372	1.44273e-07	6.84081	6.84081	12211	7.85558e-07	chr12	49726591	49727114	49726591	FALSE	FALSE
chr12_49729728_49731162	0.174325	0.16864	-0.00568509	2635	-0.0687875	4764.5	506	372	0.0812697	1.09007	-1.09007	4764.5	0.130942	chr12	49729728	49731162	49729728	FALSE	TRUE
chr12_49738680_49740841	0.0435779	0.0479004	0.00432254	10606	0.119597	10860	506	372	0.00243586	2.61335	2.61335	10860	0.00613014	chr12	49738680	49740841	49738680	FALSE	FALSE
chr12_49760221_49761127	0.0227398	0.0226195	-0.000120325	7222	-0.0225679	7168.5	506	372	0.567406	0.246106	-0.246106	7168.5	0.647679	chr12	49760221	49761127	49760221	FALSE	FALSE
chr12_498098_498920	0.0467591	0.0465369	-0.000222158	6816	-0.0554103	5507.5	506	372	0.160227	0.795263	-0.795263	5507.5	0.230302	chr12	498098	498920	498098	TRUE	FALSE
chr12_49931623_49933637	0.0801055	0.0861992	0.00609375	10880	0.112882	10748	506	372	0.00422314	2.37436	2.37436	10748	0.0100247	chr12	49931623	49933637	49931623	FALSE	TRUE
chr12_49961630_49962219	0.0326357	0.0327198	8.40798e-05	7978	-0.0228123	7160	506	372	0.563217	0.249324	-0.249324	7160	0.643765	chr12	49961630	49962219	49961630	FALSE	FALSE
chr12_50016973_50017466	0.0383974	0.0373851	-0.00101231	4465	-0.0566747	5422	506	372	0.150901	0.821307	-0.821307	5422	0.21953	chr12	50016973	50017466	50016973	FALSE	FALSE
chr12_50100442_50101587	0.0336084	0.0333307	-0.000277713	6599	-0.0553891	5510.5	506	372	0.160388	0.794829	-0.794829	5510	0.23046	chr12	50100442	50101587	50100442	FALSE	FALSE
chr12_50135029_50136043	0.0414421	0.0412901	-0.000151984	7112	-0.0736325	4515	506	372	0.0620175	1.20749	-1.20749	4515	0.103966	chr12	50135029	50136043	50135029	FALSE	FALSE
chr12_5018585_5021171	0.23016	0.196881	-0.0332792	1222	-0.275097	561	506	372	3.11309e-12	11.5068	-11.5068	561	3.6138e-11	chr12	5018585	5021171	5018585	TRUE	TRUE
chr12_50188655_50188961	0.923369	0.929675	0.00630683	10905	0.10282	10557	506	372	0.00916171	2.03802	2.03802	10557	0.0198075	chr12	50188655	50188961	50188655	FALSE	FALSE
chr12_50221558_50222609	0.0415138	0.0417676	0.000253841	8454	0.0235242	8876	506	372	0.551099	0.25877	0.25877	8876	0.632797	chr12	50221558	50222609	50221558	FALSE	FALSE
chr12_50236638_50236975	0.0204287	0.019767	-0.000661688	5218	-0.0721078	4590	506	372	0.0676209	1.16992	-1.16992	4590	0.112043	chr12	50236638	50236975	50236638	FALSE	FALSE
chr12_50297580_50297988	0.397969	0.0618701	-0.336099	7	-0.428641	50	506	372	1.70538e-27	26.7682	-26.7682	50	2.31027e-25	chr12	50297580	50297988	50297580	FALSE	TRUE
chr12_50349079_50349525	0.645537	0.685626	0.0400895	12504	0.109705	10699	506	372	0.005428	2.26536	2.26536	10699	0.0125698	chr12	50349079	50349525	50349079	FALSE	TRUE
chr12_50354839_50356163	0.324612	0.428696	0.104084	13220	0.337148	13288	506	372	1.28223e-17	16.892	16.892	13288	3.30865e-16	chr12	50354839	50356163	50354839	FALSE	FALSE
chr12_50451197_50451943	0.0331173	0.0320921	-0.00102521	4446	-0.0830677	4049	506	372	0.0352638	1.45267	-1.45267	4049	0.0643825	chr12	50451197	50451943	50451197	FALSE	FALSE
chr12_50474869_50475445	0.815723	0.851508	0.0357851	12394	0.16129	11558	506	372	4.35178e-05	4.36133	4.36133	11558	0.000157799	chr12	50474869	50475445	50474869	FALSE	TRUE
chr12_50478886_50479329	0.0215345	0.0213205	-0.000214059	6850	-0.0520953	5673	506	372	0.186741	0.728761	-0.728761	5673	0.26199	chr12	50478886	50479329	50478886	FALSE	FALSE
chr12_50505138_50506235	0.0733189	0.0737612	0.000442252	8818	0.0412576	9325	506	372	0.295751	0.529074	0.529074	9325	0.383327	chr12	50505138	50506235	50505138	FALSE	FALSE
chr12_50560726_50561386	0.0344244	0.0345114	8.69595e-05	7986	-0.0329593	6645.5	506	372	0.403572	0.394079	-0.394079	6645.5	0.493785	chr12	50560726	50561386	50560726	FALSE	FALSE
chr12_50794549_50794920	0.0417634	0.0420725	0.00030902	8576	-0.048504	5840	506	372	0.218975	0.659604	-0.659604	5840	0.299794	chr12	50794549	50794920	50794549	FALSE	FALSE
chr12_50898621_50899164	0.0208811	0.0207883	-9.27486e-05	7336	-0.0347178	6556	506	372	0.378952	0.421416	-0.421416	6556	0.469556	chr12	50898621	50899164	50898621	FALSE	FALSE
chr12_510523_510791	0.0426658	0.0417795	-0.000886291	4694	-0.0686281	4775	506	372	0.0819773	1.08631	-1.08631	4775	0.131878	chr12	510523	510791	510523	TRUE	FALSE
chr12_51157498_51158842	0.0492332	0.0479525	-0.00128071	4098	-0.127162	2479	506	372	0.0012688	2.89661	-2.89661	2478	0.00341582	chr12	51157498	51158842	51157498	FALSE	FALSE
chr12_51236633_51236924	0.664028	0.734477	0.0704497	12946	0.130159	11056.5	506	372	0.00097068	3.01292	3.01292	11056.5	0.00268528	chr12	51236633	51236924	51236633	FALSE	TRUE
chr12_51419640_51420347	0.0229797	0.0233096	0.000329975	8610	-0.0249904	7055	506	372	0.526552	0.278559	-0.278559	7055	0.610406	chr12	51419640	51420347	51419640	FALSE	FALSE
chr12_51441598_51442187	0.0358568	0.0361541	0.000297286	8538	-0.0271686	6941.5	506	372	0.491147	0.308789	-0.308789	6941.5	0.577316	chr12	51441598	51442187	51441598	FALSE	FALSE
chr12_51476859_51477552	0.0277951	0.0271143	-0.00068076	5164	-0.108313	3054	506	372	0.00604754	2.21842	-2.21842	3053	0.0138109	chr12	51476859	51477552	51476859	FALSE	FALSE
chr12_5153012_5154346	0.430997	0.382632	-0.0483644	923	-0.165891	1682	506	372	2.61575e-05	4.5824	-4.5824	1682	9.8487e-05	chr12	5153012	5154346	5153012	TRUE	TRUE
chr12_51566680_51567072	0.0331417	0.0323081	-0.000833582	4808	-0.0422776	6172.5	506	372	0.283971	0.546727	-0.546727	6172.5	0.370862	chr12	51566680	51567072	51566680	FALSE	FALSE
chr12_51610892_51611724	0.071194	0.0505337	-0.0206603	1662	-0.369087	163	506	372	8.37408e-21	20.0771	-20.0771	163	3.69523e-19	chr12	51610892	51611724	51610892	FALSE	FALSE
chr12_51632489_51633162	0.0313035	0.0307709	-0.000532564	5623	-0.104759	3205	506	372	0.00792828	2.10082	-2.10082	3204	0.0174585	chr12	51632489	51633162	51632489	FALSE	FALSE
chr12_51663404_51664411	0.0505682	0.0971528	0.0465846	12633	0.416805	13485	506	372	4.36283e-26	25.3602	25.3602	13485	4.5464e-24	chr12	51663404	51664411	51663404	FALSE	FALSE
chr12_51785279_51785821	0.0449542	0.0705051	0.0255509	12063	0.401494	13462	506	372	2.53229e-24	23.5965	23.5965	13462	1.92724e-22	chr12	51785279	51785821	51785279	FALSE	FALSE
chr12_51818460_51819166	0.0709802	0.0563872	-0.014593	1948	-0.189893	1355	506	372	1.48726e-06	5.82761	-5.82761	1355	6.90469e-06	chr12	51818460	51819166	51818460	FALSE	FALSE
chr12_51984474_51985284	0.0337214	0.0303853	-0.00333614	3025	-0.228378	947	506	372	7.10709e-09	8.14831	-8.14831	947	4.82606e-08	chr12	51984474	51985284	51984474	FALSE	FALSE
chr12_52214179_52216138	0.358762	0.407211	0.0484489	12676	0.21193	12276	506	372	7.80908e-08	7.1074	7.1074	12276	4.45617e-07	chr12	52214179	52216138	52214179	FALSE	TRUE
chr12_52240772_52242547	0.0937294	0.0923232	-0.00140619	3967	-0.0472502	5914.5	506	372	0.23112	0.636162	-0.636162	5914.5	0.313412	chr12	52240772	52242547	52240772	FALSE	FALSE
chr12_52300801_52301583	0.374337	0.380143	0.00580671	10847	-0.0400995	6288	506	372	0.309518	0.509314	-0.509314	6288	0.398048	chr12	52300801	52301583	52300801	FALSE	FALSE
chr12_52400467_52401696	0.215801	0.263247	0.0474459	12652	0.102076	10541	506	372	0.00967851	2.01419	2.01419	10541	0.0207723	chr12	52400467	52401696	52400467	FALSE	TRUE
chr12_52430519_52431598	0.0548597	0.0497749	-0.0050848	2709	-0.158135	1791	506	372	6.12408e-05	4.21296	-4.21296	1791	0.000217067	chr12	52430519	52431598	52430519	FALSE	FALSE
chr12_52444553_52445421	0.0220407	0.0228497	0.000809025	9294	0.201236	12130	506	372	3.38889e-07	6.46994	6.46994	12130	1.74693e-06	chr12	52444553	52445421	52444553	FALSE	FALSE
chr12_52463348_52464202	0.0375864	0.0370152	-0.00057124	5485	-0.0860959	3906	506	372	0.0291044	1.53604	-1.53604	3906	0.054594	chr12	52463348	52464202	52463348	FALSE	FALSE
chr12_52473350_52474178	0.941085	0.961321	0.0202358	11859	0.381412	13426	506	372	4.15515e-22	21.3814	21.3814	13426	2.27894e-20	chr12	52473350	52474178	52473350	FALSE	TRUE
chr12_52626793_52627577	0.274945	0.35477	0.0798247	13032	0.0201879	8777	506	372	0.608965	0.215407	0.215407	8777	0.683371	chr12	52626793	52627577	52626793	FALSE	TRUE
chr12_52652018_52652743	0.537752	0.527475	-0.0102774	2217	0.0203047	8780	506	372	0.606893	0.216888	0.216888	8780	0.681893	chr12	52652018	52652743	52652018	FALSE	TRUE
chr12_53267859_53268290	0.0514402	0.0673579	0.0159176	11641	0.251233	12735	506	372	1.91939e-10	9.71684	9.71684	12735	1.66679e-09	chr12	53267859	53268290	53267859	FALSE	FALSE
chr12_53399872_53400896	0.0290172	0.0284014	-0.000615833	5351	-0.06883	4761	506	372	0.0810818	1.09108	-1.09108	4761	0.130686	chr12	53399872	53400896	53399872	FALSE	FALSE
chr12_53448008_53448406	0.07691	0.103567	0.0266569	12106	0.344617	13325	506	372	2.44509e-18	17.6117	17.6117	13325	7.15413e-17	chr12	53448008	53448406	53448008	FALSE	FALSE
chr12_53472814_53473491	0.0289898	0.0278446	-0.00114519	4270	-0.139158	2179	506	372	0.000420307	3.37643	-3.37643	2179	0.00126559	chr12	53472814	53473491	53472814	FALSE	FALSE
chr12_53574025_53575150	0.0251602	0.0245757	-0.000584522	5448	-0.0755982	4401	506	372	0.055366	1.25676	-1.25676	4401	0.0945831	chr12	53574025	53575150	53574025	FALSE	FALSE
chr12_53613716_53615103	0.0581551	0.0635533	0.00539823	10791	0.214554	12310	506	372	5.38807e-08	7.26857	7.26857	12310	3.15573e-07	chr12	53613716	53615103	53613716	FALSE	FALSE
chr12_53645719_53646071	0.0368997	0.0343943	-0.00250539	3287	-0.187646	1385	506	372	1.97485e-06	5.70447	-5.70447	1385	8.99873e-06	chr12	53645719	53646071	53645719	FALSE	FALSE
chr12_53693441_53694028	0.0296079	0.0298256	0.000217691	8369	-0.0318012	6707.5	506	372	0.420298	0.376443	-0.376443	6707.5	0.509875	chr12	53693441	53694028	53693441	FALSE	FALSE
chr12_53715133_53715516	0.0791934	0.0748382	-0.00435524	2826	-0.144736	2060.5	506	372	0.000244092	3.61245	-3.61245	2060.5	0.000769539	chr12	53715133	53715516	53715133	FALSE	FALSE
chr12_53738546_53738986	0.0398877	0.0388424	-0.00104531	4413	-0.0871053	3851	506	372	0.0272684	1.56434	-1.56434	3851	0.0516796	chr12	53738546	53738986	53738546	FALSE	FALSE
chr12_53835295_53835568	0.029999	0.0292658	-0.000733187	5039	-0.0825152	4069.5	506	372	0.0365001	1.43771	-1.43771	4069.5	0.0663535	chr12	53835295	53835568	53835295	FALSE	FALSE
chr12_53845668_53846606	0.0339129	0.0331621	-0.000750769	4996	-0.0541672	5574	506	372	0.169815	0.770024	-0.770024	5574	0.241902	chr12	53845668	53846606	53845668	FALSE	FALSE
chr12_53886562_53887101	0.0623918	0.0522075	-0.0101843	2229	-0.260625	677	506	372	3.95578e-11	10.4028	-10.4028	677	3.84426e-10	chr12	53886562	53887101	53886562	FALSE	FALSE
chr12_53894450_53895313	0.0290618	0.0287894	-0.000272386	6621	-0.064208	5004	506	372	0.103675	0.984328	-0.984328	5004	0.160935	chr12	53894450	53895313	53894450	FALSE	FALSE
chr12_54069625_54070177	0.0218251	0.0220862	0.000261059	8472	0.0245973	8904	506	372	0.533078	0.273209	0.273209	8904	0.616336	chr12	54069625	54070177	54069625	FALSE	FALSE
chr12_54071053_54071265	0.499152	0.549933	0.0507813	12722	0.111522	10731	506	372	0.00470563	2.32738	2.32738	10731	0.0110538	chr12	54071053	54071265	54071053	FALSE	TRUE
chr12_54144562_54145470	0.131093	0.0999532	-0.03114	1293	-0.264248	643	506	372	2.11931e-11	10.6738	-10.6738	643	2.16029e-10	chr12	54144562	54145470	54144562	FALSE	FALSE
chr12_54332805_54333731	0.150284	0.163894	0.0136102	11506	0.0373157	9239	506	372	0.344314	0.463045	0.463045	9239	0.434425	chr12	54332805	54333731	54332805	FALSE	TRUE
chr12_54343622_54343848	0.131959	0.172603	0.0406439	12516	0.0722725	9964	506	372	0.0669962	1.17395	1.17395	9964	0.111157	chr12	54343622	54343848	54343622	FALSE	TRUE
chr12_54346777_54347101	0.0744831	0.151276	0.0767925	13004	0.225881	12462.5	506	372	1.03381e-08	7.98556	7.98556	12462.5	6.82505e-08	chr12	54346777	54347101	54346777	FALSE	TRUE
chr12_54348695_54349378	0.36827	0.3015	-0.06677	631	-0.160706	1754	506	372	4.63814e-05	4.33366	-4.33366	1754	0.000167153	chr12	54348695	54349378	54348695	FALSE	TRUE
chr12_54354529_54355491	0.590299	0.358382	-0.231916	38	-0.29742	437	506	372	4.75997e-14	13.3224	-13.3224	437	7.28626e-13	chr12	54354529	54355491	54354529	FALSE	TRUE
chr12_54366815_54369103	0.21778	0.25989	0.0421099	12553	0.138042	11207	506	372	0.000467503	3.33022	3.33022	11207	0.0013904	chr12	54366815	54369103	54366815	FALSE	TRUE
chr12_54378696_54380102	0.12069	0.12913	0.00843993	11114	0.0607973	9748.5	506	372	0.123354	0.908846	0.908846	9748.5	0.186068	chr12	54378696	54380102	54378696	FALSE	FALSE
chr12_54387825_54388732	0.133472	0.204704	0.0712314	12955	0.208339	12227	506	372	1.28861e-07	6.88988	6.88988	12227	7.09624e-07	chr12	54387825	54388732	54387825	FALSE	FALSE
chr12_54393374_54394648	0.100914	0.11844	0.0175259	11729	0.0291768	9021	506	372	0.459673	0.337551	0.337551	9021	0.547493	chr12	54393374	54394648	54393374	FALSE	FALSE
chr12_54399906_54400495	0.127278	0.156834	0.0295559	12208	0.0338518	9150	506	372	0.390958	0.40787	0.40787	9150	0.481395	chr12	54399906	54400495	54399906	FALSE	TRUE
chr12_54402682_54403347	0.0534737	0.0506141	-0.0028596	3154	-0.0502784	5756	506	372	0.202581	0.6934	-0.6934	5756	0.280725	chr12	54402682	54403347	54402682	FALSE	TRUE
chr12_54424610_54425173	0.499164	0.292688	-0.206476	63	-0.248002	769	506	372	3.26198e-10	9.48652	-9.48652	769	2.74473e-09	chr12	54424610	54425173	54424610	FALSE	TRUE
chr12_54427025_54428709	0.173861	0.179164	0.00530319	10773	-0.00922266	7773	506	372	0.815276	0.0886952	-0.0886952	7773	0.855835	chr12	54427025	54428709	54427025	FALSE	TRUE
chr12_54440642_54441543	0.539905	0.433104	-0.1068	306	-0.216254	1052	506	372	4.22705e-08	7.37396	-7.37396	1052	2.51709e-07	chr12	54440642	54441543	54440642	FALSE	TRUE
chr12_54519768_54520457	0.210221	0.208098	-0.00212276	3430	0.00870203	8407	506	372	0.825537	0.0832633	0.0832633	8407	0.864797	chr12	54519768	54520457	54519768	FALSE	TRUE
chr12_54673814_54674988	0.0457291	0.0448569	-0.000872217	4718	-0.0822071	4084	506	372	0.0372055	1.42939	-1.42939	4084	0.0674548	chr12	54673814	54674988	54673814	FALSE	FALSE
chr12_54784900_54785238	0.100689	0.141396	0.0407067	12520	0.162502	11580	506	372	3.81076e-05	4.41899	4.41899	11580	0.000139752	chr12	54784900	54785238	54784900	FALSE	FALSE
chr12_54812702_54813191	0.0573361	0.0559137	-0.00142236	3949	-0.0908666	3732	506	372	0.0212795	1.67204	-1.67204	3731	0.0414424	chr12	54812702	54813191	54812702	FALSE	FALSE
chr12_5539895_5540703	0.169047	0.153296	-0.015751	1896	-0.0202516	7296	506	372	0.607835	0.216214	-0.216214	7296	0.682498	chr12	5539895	5540703	5539895	TRUE	TRUE
chr12_5541210_5542973	0.0849449	0.0640612	-0.0208837	1654	-0.203026	1190	506	372	2.66376e-07	6.5745	-6.5745	1190	1.39706e-06	chr12	5541210	5542973	5541210	TRUE	TRUE
chr12_5603587_5603990	0.908931	0.888874	-0.0200575	1694	-0.0617961	5130	506	372	0.117311	0.930662	-0.930662	5130	0.178463	chr12	5603587	5603990	5603587	TRUE	TRUE
chr12_56101212_56101600	0.0813457	0.0759659	-0.00537984	2677	-0.000233754	8086.5	506	372	0.99538	0.00201101	-0.00201101	8087	0.996999	chr12	56101212	56101600	56101212	FALSE	FALSE
chr12_56122017_56123186	0.0451794	0.0456324	0.000453044	8832	-0.00794764	7818	506	372	0.840458	0.075484	-0.075484	7818	0.877442	chr12	56122017	56123186	56122017	FALSE	FALSE
chr12_56211325_56211553	0.0307842	0.030885	0.000100847	8034	-0.0251073	7047.5	506	372	0.52462	0.280155	-0.280155	7048	0.608582	chr12	56211325	56211553	56211325	FALSE	FALSE
chr12_56223263_56223598	0.027732	0.0275463	-0.000185739	6972	-0.0422245	6177	506	372	0.284576	0.545801	-0.545801	6177	0.371474	chr12	56223263	56223598	56223263	FALSE	FALSE
chr12_56320739_56321628	0.0281138	0.0277971	-0.00031675	6439	-0.0579391	5335	506	372	0.141995	0.847727	-0.847727	5335	0.209201	chr12	56320739	56321628	56320739	FALSE	FALSE
chr12_56325774_56326223	0.0181771	0.0182215	4.44129e-05	7831	0.0211122	8801	506	372	0.592663	0.227192	0.227192	8801	0.669458	chr12	56325774	56326223	56325774	FALSE	FALSE
chr12_56360467_56360909	0.0587296	0.057972	-0.00075759	4982	-0.0216701	7225	506	372	0.582924	0.234388	-0.234388	7225	0.66077	chr12	56360467	56360909	56360467	FALSE	FALSE
chr12_56367636_56368172	0.0745434	0.0753816	0.000838146	9321	0.0265098	8951.5	506	372	0.501718	0.29954	0.29954	8951.5	0.587448	chr12	56367636	56368172	56367636	FALSE	FALSE
chr12_56435573_56436406	0.0424812	0.0415863	-0.0008949	4677	-0.0639849	5015	506	372	0.104881	0.979304	-0.979304	5015	0.162584	chr12	56435573	56436406	56435573	FALSE	FALSE
chr12_56472792_56474393	0.056363	0.0571362	0.000773139	9250	0.0965511	10438	506	372	0.0144024	1.84157	1.84157	10438	0.029437	chr12	56472792	56474393	56472792	FALSE	FALSE
chr12_56497868_56499047	0.0453011	0.0444061	-0.000894975	4676	-0.0846934	3982.5	506	372	0.0318315	1.49714	-1.49714	3982.5	0.0588376	chr12	56497868	56499047	56497868	FALSE	FALSE
chr12_56511861_56512409	0.0447606	0.0448958	0.000135183	8132	0.0259361	8939	506	372	0.511022	0.29156	0.29156	8939	0.596178	chr12	56511861	56512409	56511861	FALSE	FALSE
chr12_56546192_56546411	0.0370476	0.0376453	0.00059776	9045	0.045327	9434	506	372	0.250666	0.600905	0.600905	9434	0.335285	chr12	56546192	56546411	56546192	FALSE	FALSE
chr12_56615523_56615767	0.0209461	0.0211046	0.000158541	8210	-0.0153215	7507.5	506	372	0.697862	0.15623	-0.15623	7507	0.761126	chr12	56615523	56615767	56615523	FALSE	FALSE
chr12_56617995_56618374	0.0318488	0.0316787	-0.000170119	7040	-0.0328743	6653	506	372	0.404786	0.392775	-0.392775	6653	0.494868	chr12	56617995	56618374	56617995	FALSE	FALSE
chr12_56651692_56652527	0.0288593	0.028585	-0.000274315	6617	-0.0455183	6004	506	372	0.248672	0.604373	-0.604373	6004	0.333145	chr12	56651692	56652527	56651692	FALSE	FALSE
chr12_56660442_56661131	0.0328781	0.0330815	0.000203393	8334	0.0251498	8920	506	372	0.523918	0.280737	0.280737	8920	0.608133	chr12	56660442	56661131	56660442	FALSE	FALSE
chr12_56693680_56694345	0.0573418	0.0576149	0.000273161	8503	-0.00805389	7814.5	506	372	0.838353	0.0765732	-0.0765732	7814.5	0.875649	chr12	56693680	56694345	56693680	FALSE	FALSE
chr12_56727661_56727996	0.0401157	0.0399813	-0.000134453	7170	-0.0249692	7057.5	506	372	0.526904	0.278269	-0.278269	7057.5	0.610657	chr12	56727661	56727996	56727661	FALSE	FALSE
chr12_56753861_56754323	0.0342516	0.0336354	-0.000616208	5348	-0.0689681	4755.5	506	372	0.0804737	1.09435	-1.09435	4755.5	0.129798	chr12	56753861	56754323	56753861	FALSE	FALSE
chr12_568702_570362	0.0673552	0.132124	0.0647683	12888	0.415211	13480	506	372	6.70482e-26	25.1736	25.1736	13480	6.67869e-24	chr12	568702	570362	568702	TRUE	FALSE
chr12_56881401_56882702	0.179683	0.201933	0.0222497	11936	0.272355	12924	506	372	5.09011e-12	11.2933	11.2933	12924	5.71772e-11	chr12	56881401	56882702	56881401	FALSE	FALSE
chr12_57023296_57024233	0.0352942	0.0348546	-0.000439595	5960	-0.0420545	6184	506	372	0.28652	0.542845	-0.542845	6184	0.373759	chr12	57023296	57024233	57023296	FALSE	FALSE
chr12_57081290_57082445	0.0535676	0.0523483	-0.00121929	4171	-0.0571422	5391	506	372	0.14756	0.831032	-0.831032	5391	0.215618	chr12	57081290	57082445	57081290	FALSE	FALSE
chr12_57118977_57119374	0.0272097	0.0273134	0.000103667	8042	0.000966892	8137	506	372	0.980556	0.00852779	0.00852779	8137	0.985868	chr12	57118977	57119374	57118977	FALSE	FALSE
chr12_57145948_57146333	0.0598842	0.0595639	-0.000320289	6423	-0.0271155	6946.5	506	372	0.491995	0.30804	-0.30804	6946.5	0.578062	chr12	57145948	57146333	57145948	FALSE	FALSE
chr12_57472274_57472619	0.0377877	0.0375875	-0.000200193	6904	-0.00237473	8021	506	372	0.952111	0.0213123	-0.0213123	8021	0.964248	chr12	57472274	57472619	57472274	FALSE	FALSE
chr12_57480797_57483116	0.0284644	0.0294194	0.00095503	9398	0.138552	11213	506	372	0.000445345	3.3513	3.3513	11213	0.00133122	chr12	57480797	57483116	57480797	FALSE	FALSE
chr12_57521524_57522159	0.0239144	0.0235047	-0.000409791	6060	-0.0533384	5610.5	506	372	0.176442	0.753398	-0.753398	5610.5	0.249713	chr12	57521524	57522159	57521524	FALSE	FALSE
chr12_57579320_57579625	0.963437	0.960568	-0.00286889	3150	-0.137883	2217	506	372	0.000474636	3.32364	-3.32364	2216	0.00141006	chr12	57579320	57579625	57579320	FALSE	FALSE
chr12_57609976_57611168	0.0274362	0.030881	0.00344483	10422	0.279623	12980	506	372	1.36806e-12	11.8639	11.8639	12980	1.67872e-11	chr12	57609976	57611168	57609976	FALSE	FALSE
chr12_57618769_57619402	0.329827	0.445064	0.115237	13277	0.178843	11821	506	372	5.81905e-06	5.23515	5.23515	11821	2.44285e-05	chr12	57618769	57619402	57618769	FALSE	FALSE
chr12_57623420_57623903	0.0343468	0.0346676	0.000320852	8597	-0.00193378	8039	506	372	0.961015	0.0172697	-0.0172697	8039	0.970544	chr12	57623420	57623903	57623420	FALSE	FALSE
chr12_57631932_57634578	0.0618934	0.0736596	0.0117663	11380	0.0970398	10451	506	372	0.0139148	1.85652	1.85652	10451	0.0285827	chr12	57631932	57634578	57631932	FALSE	FALSE
chr12_57636557_57637673	0.0405495	0.0459507	0.00540116	10792	0.236283	12587	506	372	2.11474e-09	8.67474	8.67474	12587	1.56463e-08	chr12	57636557	57637673	57636557	FALSE	FALSE
chr12_57853715_57853973	0.0466946	0.0462433	-0.000451289	5919	-0.0570891	5393	506	372	0.147937	0.829924	-0.829924	5393	0.216122	chr12	57853715	57853973	57853715	FALSE	FALSE
chr12_57881750_57882035	0.0394053	0.038218	-0.0011873	4209	-0.083344	4037.5	506	372	0.0346592	1.46018	-1.46018	4037.5	0.0634154	chr12	57881750	57882035	57881750	FALSE	FALSE
chr12_57914385_57914820	0.0628265	0.0607813	-0.00204523	3477	-0.088104	3815.5	506	372	0.025551	1.59259	-1.59259	3815	0.0488071	chr12	57914385	57914820	57914385	FALSE	FALSE
chr12_57916322_57916810	0.0517197	0.053059	0.00133928	9652	0.08727	10255	506	372	0.0269786	1.56898	1.56898	10255	0.0512018	chr12	57916322	57916810	57916322	FALSE	FALSE
chr12_57940563_57940981	0.0524246	0.0517842	-0.000640363	5276	-0.0673318	4843	506	372	0.0879204	1.05591	-1.05591	4843	0.140059	chr12	57940563	57940981	57940563	FALSE	FALSE
chr12_57984776_57985302	0.0363935	0.0379023	0.00150883	9744	0.156328	11495	506	372	7.42636e-05	4.12922	4.12922	11495	0.000259291	chr12	57984776	57985302	57984776	FALSE	FALSE
chr12_58003880_58004249	0.725844	0.717171	-0.00867248	2350	-0.0484402	5842	506	372	0.219582	0.658404	-0.658404	5842	0.300533	chr12	58003880	58004249	58003880	FALSE	FALSE
chr12_58013171_58013652	0.313212	0.573625	0.260413	13498	0.316758	13207	506	372	9.86884e-16	15.0057	15.0057	13207	1.89905e-14	chr12	58013171	58013652	58013171	FALSE	FALSE
chr12_58014708_58015697	0.0386467	0.0479024	0.00925568	11200	0.0613711	9767	506	372	0.119853	0.92135	0.92135	9767	0.181759	chr12	58014708	58015697	58014708	FALSE	FALSE
chr12_58021294_58022037	0.521224	0.638016	0.116791	13282	0.250861	12729.5	506	372	2.04091e-10	9.69018	9.69018	12729.5	1.76104e-09	chr12	58021294	58022037	58021294	FALSE	TRUE
chr12_58025661_58027056	0.0626643	0.0480243	-0.01464	1946	-0.117398	2768.5	506	372	0.00292558	2.53379	-2.53379	2767.5	0.00721779	chr12	58025661	58027056	58025661	FALSE	FALSE
chr12_58068473_58068774	0.942856	0.947664	0.00480735	10687	0.106953	10648.5	506	372	0.00671371	2.17304	2.17304	10648.5	0.0151534	chr12	58068473	58068774	58068473	FALSE	TRUE
chr12_58087531_58088029	0.0683452	0.0684631	0.000117928	8080	0.0163415	8662	506	372	0.678829	0.168239	0.168239	8662	0.744563	chr12	58087531	58088029	58087531	FALSE	FALSE
chr12_58119909_58121551	0.336438	0.404357	0.0679187	12917	0.234678	12573.5	506	372	2.71316e-09	8.56652	8.56652	12573.5	1.97609e-08	chr12	58119909	58121551	58119909	FALSE	FALSE
chr12_58130870_58132047	0.416649	0.360239	-0.0564094	787	-0.150825	1925	506	372	0.000132001	3.87942	-3.87942	1925	0.000440558	chr12	58130870	58132047	58130870	FALSE	FALSE
chr12_58145853_58146360	0.0546381	0.0530856	-0.00155251	3790	-0.120596	2672	506	372	0.00223928	2.64989	-2.64989	2671	0.00567444	chr12	58145853	58146360	58145853	FALSE	FALSE
chr12_58158855_58160000	0.0778966	0.104731	0.0268341	12112	0.261603	12837	506	372	3.3455e-11	10.4755	10.4755	12837	3.29611e-10	chr12	58158855	58160000	58158855	FALSE	FALSE
chr12_58165563_58165962	0.0594488	0.0595127	6.39185e-05	7905	0.00433508	8269.5	506	372	0.912613	0.0397133	0.0397133	8269.5	0.934339	chr12	58165563	58165962	58165563	FALSE	FALSE
chr12_58166252_58166741	0.0234718	0.0230392	-0.000432689	5990	-0.0915785	3710	506	372	0.0202851	1.69282	-1.69282	3710	0.0396941	chr12	58166252	58166741	58166252	FALSE	FALSE
chr12_58238840_58241046	0.0287954	0.0285963	-0.000199094	6908	0.00963704	8429	506	372	0.807132	0.0930555	0.0930555	8429	0.849391	chr12	58238840	58241046	58238840	FALSE	FALSE
chr12_58329723_58330004	0.0461772	0.0470025	0.000825226	9311	-0.00337881	7987	506	372	0.93186	0.0306495	-0.0306495	7987	0.949094	chr12	58329723	58330004	58329723	FALSE	FALSE
chr12_59313559_59314452	0.0423198	0.0374002	-0.00491955	2736	-0.165551	1686	506	372	2.71724e-05	4.56587	-4.56587	1686	0.000102024	chr12	59313559	59314452	59313559	FALSE	FALSE
chr12_59989651_59990507	0.0443134	0.0379655	-0.00634793	2563	-0.34772	229	506	372	1.21577e-18	17.9152	-17.9152	229	3.73469e-17	chr12	59989651	59990507	59989651	FALSE	FALSE
chr12_62584768_62586268	0.318723	0.0842261	-0.234497	34	-0.354414	209	506	372	2.63705e-19	18.5789	-18.5789	209	8.90876e-18	chr12	62584768	62586268	62584768	FALSE	TRUE
chr12_62653865_62654677	0.0419838	0.0411441	-0.000839729	4793	-0.0675124	4833	506	372	0.087072	1.06012	-1.06012	4833	0.138887	chr12	62653865	62654677	62653865	FALSE	FALSE
chr12_62860383_62860855	0.0707644	0.0701277	-0.000636697	5286	-0.101279	3331	506	372	0.0102609	1.98881	-1.98881	3329	0.0219077	chr12	62860383	62860855	62860383	FALSE	FALSE
chr12_62996159_62997632	0.0438436	0.0441817	0.000338115	8630	-0.0286243	6872.5	506	372	0.468218	0.329552	-0.329552	6873	0.555522	chr12	62996159	62997632	62996159	FALSE	FALSE
chr12_6309152_6310392	0.0608017	0.0626836	0.00188197	9926	0.121074	10884.5	506	372	0.00215042	2.66748	2.66748	10884	0.00547074	chr12	6309152	6310392	6309152	TRUE	TRUE
chr12_63328143_63329135	0.0572317	0.0557062	-0.00152557	3819	-0.137458	2230	506	372	0.000494156	3.30614	-3.30614	2230	0.00146324	chr12	63328143	63329135	63328143	FALSE	FALSE
chr12_63543636_63544967	0.419976	0.355488	-0.0644882	658	-0.0994836	3398	506	372	0.011689	1.93222	-1.93222	3396	0.0245429	chr12	63543636	63544967	63543636	FALSE	TRUE
chr12_64061836_64062774	0.136142	0.0914357	-0.0447064	989	-0.200965	1215	506	372	3.51403e-07	6.45419	-6.45419	1215	1.80594e-06	chr12	64061836	64062774	64061836	FALSE	TRUE
chr12_64173448_64174238	0.0311646	0.0313387	0.000174012	8252	0.0040057	8255	506	372	0.919237	0.0365724	0.0365724	8255	0.939133	chr12	64173448	64174238	64173448	FALSE	FALSE
chr12_64237403_64238401	0.0379922	0.0391014	0.00110919	9510	0.0856496	10222	506	372	0.0299495	1.52361	1.52361	10222	0.0558773	chr12	64237403	64238401	64237403	FALSE	FALSE
chr12_64615824_64616386	0.0355911	0.0359389	0.000347853	8650	0.00572698	8313	506	372	0.884693	0.0532073	0.0532073	8313	0.912096	chr12	64615824	64616386	64615824	FALSE	FALSE
chr12_6472660_6473322	0.134713	0.391328	0.256615	13496	0.323962	13241	506	372	2.19226e-16	15.6591	15.6591	13241	4.64039e-15	chr12	6472660	6473322	6472660	TRUE	FALSE
chr12_64784010_64784664	0.163	0.275366	0.112366	13266	0.133718	11123.5	506	372	0.000701204	3.15416	3.15416	11123.5	0.00200194	chr12	64784010	64784664	64784010	FALSE	FALSE
chr12_64797934_64798944	0.0512637	0.0415577	-0.00970598	2267	-0.146064	2029	506	372	0.000213869	3.66985	-3.66985	2029	0.000683484	chr12	64797934	64798944	64797934	FALSE	FALSE
chr12_64845599_64846314	0.03139	0.0306351	-0.000754936	4991	-0.104047	3231.5	506	372	0.00836268	2.07765	-2.07765	3230	0.0182783	chr12	64845599	64846314	64845599	FALSE	FALSE
chr12_6492889_6493522	0.072871	0.114113	0.0412424	12534	0.305942	13153	506	372	8.88156e-15	14.0515	14.0515	13153	1.51344e-13	chr12	6492889	6493522	6492889	TRUE	FALSE
chr12_65152869_65153489	0.0424236	0.0426719	0.000248358	8439	0.0404607	9309	506	372	0.305179	0.515446	0.515446	9309	0.393327	chr12	65152869	65153489	65152869	FALSE	FALSE
chr12_65218245_65219143	0.0721052	0.0527992	-0.019306	1725	-0.130738	2392	506	372	0.00092114	3.03567	-3.03567	2391	0.00256288	chr12	65218245	65219143	65218245	FALSE	TRUE
chr12_65514878_65515863	0.203977	0.235376	0.0313991	12269	0.0115708	8506	506	372	0.769414	0.11384	0.11384	8506	0.81976	chr12	65514878	65515863	65514878	FALSE	TRUE
chr12_65563195_65564396	0.0397397	0.0399807	0.000241015	8423	0.0309777	9066	506	372	0.432434	0.36408	0.36408	9066	0.521284	chr12	65563195	65564396	65563195	FALSE	FALSE
chr12_65672391_65673250	0.0340645	0.0341071	4.2595e-05	7825	-0.00753326	7833	506	372	0.848679	0.0712568	-0.0712568	7833	0.884116	chr12	65672391	65673250	65672391	FALSE	FALSE
chr12_6579555_6580429	0.0359049	0.0353353	-0.000569642	5487	-0.0839921	4013.5	506	372	0.0332753	1.47788	-1.47788	4014	0.0611393	chr12	6579555	6580429	6579555	TRUE	FALSE
chr12_6602919_6603306	0.0359218	0.0351629	-0.000758827	4979	-0.0637299	5027.5	506	372	0.106273	0.973578	-0.973578	5027.5	0.16444	chr12	6602919	6603306	6602919	TRUE	FALSE
chr12_66122788_66123328	0.317102	0.287477	-0.0296249	1339	-0.0394619	6314	506	372	0.317274	0.498566	-0.498566	6314	0.406441	chr12	66122788	66123328	66122788	FALSE	FALSE
chr12_66135120_66136400	0.0636524	0.0625552	-0.00109724	4344	-0.00929704	7769.5	506	372	0.813813	0.0894754	-0.0894754	7769.5	0.85463	chr12	66135120	66136400	66135120	FALSE	FALSE
chr12_66217627_66220181	0.0802107	0.0802348	2.4125e-05	7752	-0.00514259	7923.5	506	372	0.8964	0.0474982	-0.0474982	7923.5	0.92185	chr12	66217627	66220181	66217627	FALSE	FALSE
chr12_6643261_6644607	0.0256834	0.0244889	-0.00119452	4204	-0.11829	2740	506	372	0.00271693	2.56592	-2.56592	2739	0.00675716	chr12	6643261	6644607	6643261	TRUE	FALSE
chr12_66524464_66524792	0.0320644	0.0318859	-0.000178482	7000	-0.0485465	5836.5	506	372	0.218572	0.660405	-0.660405	5836.5	0.299332	chr12	66524464	66524792	66524464	FALSE	FALSE
chr12_66563202_66563945	0.0443507	0.0449397	0.000589013	9028	0.0882634	10274.5	506	372	0.0252858	1.59712	1.59712	10274.5	0.0483619	chr12	66563202	66563945	66563202	FALSE	FALSE
chr12_66582695_66583345	0.140998	0.326926	0.185927	13448	0.367621	13397	506	372	1.18937e-20	19.9247	19.9247	13397	5.01946e-19	chr12	66582695	66583345	66582695	FALSE	TRUE
chr12_6664425_6665336	0.534339	0.0332543	-0.501085	1	-0.419504	64	506	372	2.0997e-26	25.6778	-25.6778	64	2.29392e-24	chr12	6664425	6665336	6664425	TRUE	FALSE
chr12_6676999_6677755	0.0444391	0.0434422	-0.000996865	4485	-0.0556016	5493	506	372	0.158789	0.799178	-0.799178	5493	0.228794	chr12	6676999	6677755	6676999	TRUE	FALSE
chr12_6716080_6716790	0.0510338	0.051111	7.71992e-05	7948	0.00117408	8149	506	372	0.976367	0.0103869	0.0103869	8149	0.983043	chr12	6716080	6716790	6716080	TRUE	FALSE
chr12_6756001_6756679	0.286398	0.487976	0.201577	13464	0.336818	13286	506	372	1.37832e-17	16.8607	16.8607	13286	3.52969e-16	chr12	6756001	6756679	6756001	TRUE	TRUE
chr12_67663041_67664047	0.0506416	0.0504767	-0.000164926	7052	-0.0560266	5467	506	372	0.155629	0.80791	-0.80791	5467	0.22503	chr12	67663041	67664047	66187848	FALSE	FALSE
chr12_6772258_6772579	0.0312406	0.0309553	-0.000285313	6565	-0.0147159	7528.5	506	372	0.709255	0.149198	-0.149198	7528.5	0.771068	chr12	6772258	6772579	6772258	TRUE	FALSE
chr12_6798113_6798922	0.0307147	0.0300935	-0.000621108	5333	-0.0764057	4362	506	372	0.0528114	1.27727	-1.27727	4362	0.0908605	chr12	6798113	6798922	6798113	TRUE	FALSE
chr12_6833058_6833491	0.0238707	0.0240368	0.000166111	8228	-0.0142802	7549	506	372	0.71749	0.144184	-0.144184	7549	0.7774	chr12	6833058	6833491	6833058	TRUE	FALSE
chr12_6861821_6862405	0.0287191	0.02801	-0.000709129	5093	-0.103415	3253	506	372	0.00876616	2.05719	-2.05719	3252	0.0190557	chr12	6861821	6862405	6861821	TRUE	FALSE
chr12_6862672_6862989	0.0461215	0.046873	0.000751529	9216	0.0333525	9136	506	372	0.397986	0.400132	0.400132	9136	0.488406	chr12	6862672	6862989	6862672	TRUE	FALSE
chr12_68725847_68726475	0.0307091	0.0308795	0.000170371	8241	0.00385694	8251.5	506	372	0.922231	0.0351604	0.0351604	8251.5	0.941765	chr12	68725847	68726475	65125420	FALSE	FALSE
chr12_6875481_6876923	0.0284236	0.0275802	-0.000843437	4786	-0.0656796	4931	506	372	0.0959939	1.01776	-1.01776	4931	0.150792	chr12	6875481	6876923	6875481	TRUE	FALSE
chr12_69004220_69005377	0.0989783	0.0934636	-0.0055147	2655	-0.221429	998	506	372	1.99716e-08	7.69959	-7.69959	998	1.25315e-07	chr12	69004220	69005377	64846518	FALSE	FALSE
chr12_69080580_69081152	0.0453485	0.0444175	-0.000931013	4625	-0.0837583	4020	506	372	0.0337688	1.47148	-1.47148	4020	0.0619789	chr12	69080580	69081152	64770743	FALSE	FALSE
chr12_69139815_69140206	0.0282511	0.0284789	0.000227815	8390	0.00813889	8394.5	506	372	0.83667	0.077446	0.077446	8394.5	0.874228	chr12	69139815	69140206	64711689	FALSE	FALSE
chr12_69201622_69202663	0.0302544	0.0300398	-0.000214605	6848	-0.0486634	5832	506	372	0.217465	0.66261	-0.66261	5832	0.298027	chr12	69201622	69202663	64649232	FALSE	FALSE
chr12_6961005_6961873	0.0380641	0.0368612	-0.00120286	4194	-0.109174	3025	506	372	0.00565737	2.24739	-2.24739	3024	0.0130274	chr12	6961005	6961873	6961005	TRUE	FALSE
chr12_69753445_69754088	0.0570526	0.0586546	0.00160197	9791	0.075646	10019	506	372	0.0552119	1.25797	1.25797	10019	0.0943555	chr12	69753445	69754088	64097807	FALSE	FALSE
chr12_6976392_6977393	0.0664714	0.0670948	0.000623368	9076	0.064803	9836	506	372	0.100512	0.997781	0.997781	9837	0.156762	chr12	6976392	6977393	6976392	TRUE	FALSE
chr12_6982319_6982936	0.0461915	0.0444919	-0.00169965	3675	-0.11863	2729	506	372	0.00264108	2.57822	-2.57822	2728	0.00658909	chr12	6982319	6982936	6982319	TRUE	FALSE
chr12_69863994_69864473	0.0334558	0.0327094	-0.000746399	5009	-0.0542788	5566	506	372	0.168937	0.772274	-0.772274	5566	0.240905	chr12	69863994	69864473	63987422	FALSE	FALSE
chr12_69979065_69979724	0.023298	0.0229393	-0.000358634	6265	-0.0658868	4920	506	372	0.09495	1.0225	-1.0225	4920	0.149429	chr12	69979065	69979724	63872171	FALSE	FALSE
chr12_70132340_70133559	0.0318995	0.0330224	0.00112291	9525	0.128671	11015	506	372	0.00110947	2.95488	2.95488	11015	0.0030278	chr12	70132340	70133559	63718336	FALSE	FALSE
chr12_7023261_7024089	0.0982064	0.0855881	-0.0126182	2050	-0.240905	819	506	372	1.0223e-09	8.99042	-8.99042	819	8.03315e-09	chr12	7023261	7024089	7023261	TRUE	FALSE
chr12_7046237_7047257	0.184834	0.199619	0.0147842	11579	0.0773832	10057	506	372	0.0498514	1.30232	1.30232	10057	0.0865485	chr12	7046237	7047257	7046237	TRUE	FALSE
chr12_7053149_7053927	0.0595619	0.0576228	-0.0019391	3528	-0.0508628	5728	506	372	0.197383	0.70469	-0.70469	5728	0.274702	chr12	7053149	7053927	7053149	TRUE	FALSE
chr12_70636617_70637749	0.0377105	0.0370237	-0.000686795	5144	-0.0888797	3785	506	372	0.0242826	1.6147	-1.6147	3784	0.0467003	chr12	70636617	70637749	63214146	FALSE	FALSE
chr12_70759437_70761052	0.0408176	0.0437065	0.0028889	10261	0.143865	11295	506	372	0.000266046	3.57504	3.57504	11295	0.00083217	chr12	70759437	70761052	63090843	FALSE	FALSE
chr12_7079500_7080129	0.0352328	0.0355155	0.000282705	8515	-0.0186366	7375.5	506	372	0.636761	0.196023	-0.196023	7375.5	0.707646	chr12	7079500	7080129	7079500	TRUE	FALSE
chr12_71003624_71004057	0.0210439	0.020252	-0.000791876	4901	0.0410663	9321	506	372	0.297996	0.52579	0.52579	9321	0.385905	chr12	71003624	71004057	62847838	FALSE	FALSE
chr12_7125534_7126356	0.0416252	0.0400658	-0.00155943	3785	-0.157093	1817	506	372	6.84569e-05	4.16458	-4.16458	1817	0.000240256	chr12	7125534	7126356	7125534	TRUE	FALSE
chr12_71833192_71834389	0.0307806	0.0304356	-0.000344951	6329	0.0165009	8668	506	372	0.675873	0.170135	0.170135	8668	0.742343	chr12	71833192	71834389	62017506	FALSE	FALSE
chr12_72056768_72057787	0.0315351	0.0303791	-0.00115602	4250	-0.127024	2482.5	506	372	0.00128439	2.8913	-2.8913	2481.5	0.00345369	chr12	72056768	72057787	61794108	FALSE	FALSE
chr12_72079789_72080261	0.0292878	0.0286394	-0.000648424	5252	-0.0570466	5398	506	372	0.148239	0.829038	-0.829038	5398	0.216376	chr12	72079789	72080261	61771634	FALSE	FALSE
chr12_72148477_72149340	0.0309088	0.0306463	-0.000262443	6658	-0.0500659	5768	506	372	0.204496	0.689315	-0.689315	5768	0.283002	chr12	72148477	72149340	61702555	FALSE	FALSE
chr12_72233323_72233635	0.0382123	0.0383269	0.00011459	8071	-0.0434676	6108.5	506	372	0.270633	0.567618	-0.567618	6108.5	0.35678	chr12	72233323	72233635	61618260	FALSE	FALSE
chr12_72665683_72667551	0.132147	0.119596	-0.0125515	2055	-0.0273174	6929.5	506	372	0.488776	0.31089	-0.31089	6929.5	0.575328	chr12	72665683	72667551	61184344	FALSE	TRUE
chr12_7342074_7342417	0.0291241	0.0287954	-0.000328716	6393	-0.0467614	5940	506	372	0.235982	0.627122	-0.627122	5940	0.318855	chr12	7342074	7342417	7342074	TRUE	FALSE
chr12_7342541_7342798	0.0655572	0.0641633	-0.00139384	3985	-0.0557078	5484.5	506	372	0.157995	0.801357	-0.801357	5484.5	0.227891	chr12	7342541	7342798	7342541	TRUE	FALSE
chr12_74564752_74565178	0.796364	0.792878	-0.00348544	2987	0.0409813	9319	506	372	0.298997	0.524333	0.524333	9319	0.386979	chr12	74564752	74565178	59286717	FALSE	TRUE
chr12_74931492_74931879	0.030598	0.0299983	-0.0005998	5396	-0.0683412	4789	506	372	0.0832637	1.07954	-1.07954	4789	0.133615	chr12	74931492	74931879	58920016	FALSE	FALSE
chr12_75723829_75724206	0.0342393	0.0340267	-0.000212565	6857	-0.047229	5916	506	372	0.23133	0.635768	-0.635768	5916	0.313665	chr12	75723829	75724206	58127689	FALSE	FALSE
chr12_75784799_75785241	0.0455543	0.041942	-0.00361229	2947	-0.0647286	4979	506	372	0.100903	0.996095	-0.996095	4979	0.157282	chr12	75784799	75785241	58066654	FALSE	FALSE
chr12_75905219_75905518	0.0355862	0.0352529	-0.000333283	6374	-0.0385694	6361	506	372	0.328345	0.48367	-0.48367	6361	0.418171	chr12	75905219	75905518	57946377	FALSE	FALSE
chr12_7592406_7593030	0.420996	0.422517	0.00152108	9753	0.0216435	8820	506	372	0.583386	0.234044	0.234044	8820	0.661183	chr12	7592406	7593030	7592406	TRUE	TRUE
chr12_76424634_76426316	0.0552064	0.0497216	-0.0054848	2660	-0.204949	1176	506	372	2.05216e-07	6.68779	-6.68779	1176	1.09322e-06	chr12	76424634	76426316	57425579	FALSE	FALSE
chr12_76477717_76479131	0.0427274	0.0417307	-0.000996709	4488	-0.110863	2966	506	372	0.00495682	2.3048	-2.3048	2965	0.0116056	chr12	76477717	76479131	57372764	FALSE	FALSE
chr12_76741909_76742286	0.0529017	0.0513297	-0.00157204	3776	-0.123008	2603	506	372	0.00182302	2.73921	-2.73921	2603	0.00472117	chr12	76741909	76742286	57109609	FALSE	FALSE
chr12_76952707_76953830	0.0378357	0.0371139	-0.000721745	5066	-0.0904416	3742	506	372	0.0218932	1.65969	-1.65969	3741	0.0425214	chr12	76952707	76953830	56898065	FALSE	FALSE
chr12_77157518_77158405	0.0345893	0.0343072	-0.000282045	6576	-0.0469846	5928	506	372	0.233753	0.631242	-0.631242	5928	0.316349	chr12	77157518	77158405	56693490	FALSE	FALSE
chr12_77272632_77273216	0.0307659	0.0305699	-0.000196062	6921	0.0719113	9957	506	372	0.0683727	1.16512	1.16512	9957	0.113095	chr12	77272632	77273216	56578679	FALSE	FALSE
chr12_77458947_77459942	0.0423409	0.0422388	-0.000102066	7301	-0.0163947	7461	506	372	0.677843	0.168871	-0.168871	7461	0.743843	chr12	77458947	77459942	56391953	FALSE	FALSE
chr12_77718453_77719440	0.0451133	0.0292013	-0.015912	1881	-0.398158	97	506	372	6.01506e-24	23.2208	-23.2208	97	4.35754e-22	chr12	77718453	77719440	56132455	FALSE	TRUE
chr12_7858499_7858785	0.836775	0.834443	-0.0023315	3344	0.110566	10716.5	506	372	0.00507419	2.29463	2.29463	10716	0.0118334	chr12	7858499	7858785	7858499	TRUE	TRUE
chr12_80083531_80085154	0.0316511	0.0323644	0.000713345	9165	0.123061	10921	506	372	0.00181471	2.74119	2.74119	10921	0.00470144	chr12	80083531	80085154	53766741	FALSE	FALSE
chr12_8025364_8025908	0.529145	0.409202	-0.119943	241	-0.326183	322	506	372	1.36963e-16	15.8634	-15.8634	322	3.00719e-15	chr12	8025364	8025908	8025364	TRUE	FALSE
chr12_80328326_80329302	0.0518754	0.0517493	-0.000126116	7200	-0.0223235	7186.5	506	372	0.57161	0.2429	-0.2429	7186.5	0.650996	chr12	80328326	80329302	53522593	FALSE	FALSE
chr12_81110725_81111126	0.592898	0.600511	0.00761312	11033	0.066503	9872	506	372	0.0918989	1.03669	1.03669	9872	0.145337	chr12	81110725	81111126	52740769	FALSE	TRUE
chr12_81330608_81331514	0.0739747	0.0463036	-0.0276711	1400	-0.327511	315	506	372	1.03222e-16	15.9862	-15.9862	315	2.29614e-15	chr12	81330608	81331514	52520381	FALSE	FALSE
chr12_81471569_81472119	0.120413	0.0905113	-0.0299016	1331	-0.137288	2233	506	372	0.000502171	3.29915	-3.29915	2233	0.00148503	chr12	81471569	81472119	52379776	FALSE	FALSE
chr12_8184964_8185616	0.040285	0.0404526	0.000167526	8232	-0.0423945	6164	506	372	0.282641	0.548764	-0.548764	6164	0.369518	chr12	8184964	8185616	8184964	TRUE	FALSE
chr12_82152320_82152674	0.0556187	0.0418607	-0.0137579	1996	-0.331251	294	506	372	4.62672e-17	16.3347	-16.3347	294	1.09195e-15	chr12	82152320	82152674	51699221	FALSE	TRUE
chr12_8234689_8235020	0.035751	0.0350004	-0.000750609	4998	-0.0930979	3652	506	372	0.0182975	1.73761	-1.73761	3651	0.036255	chr12	8234689	8235020	8234689	TRUE	FALSE
chr12_82752004_82752746	0.0464334	0.0454898	-0.000943564	4591	-0.115538	2823	506	372	0.00340797	2.4675	-2.4675	2822	0.00827379	chr12	82752004	82752746	51099149	FALSE	FALSE
chr12_83080662_83081646	0.0262007	0.0259399	-0.000260793	6667	-0.0404501	6273	506	372	0.305306	0.515265	-0.515265	6273	0.393453	chr12	83080662	83081646	50770249	FALSE	FALSE
chr12_8332788_8333193	0.110574	0.153473	0.0428994	12567	0.232904	12552	506	372	3.56735e-09	8.44765	8.44765	12552	2.53951e-08	chr12	8332788	8333193	8332788	TRUE	FALSE
chr12_8395051_8396713	0.0342537	0.0368736	0.0026199	10182	0.190913	11995	506	372	1.3063e-06	5.88396	5.88396	11995	6.11908e-06	chr12	8395051	8396713	8395051	TRUE	FALSE
chr12_85306282_85306829	0.0848087	0.0782214	-0.00658728	2540	-0.0373794	6427	506	372	0.34349	0.464085	-0.464085	6427	0.433467	chr12	85306282	85306829	48545066	FALSE	TRUE
chr12_8548855_8549512	0.0981227	0.0903241	-0.0077986	2423	-0.079402	4218.5	506	372	0.0441773	1.3548	-1.3548	4218.5	0.078007	chr12	8548855	8549512	8548855	TRUE	TRUE
chr12_85673878_85674700	0.21373	0.150018	-0.0637118	672	-0.173647	1566	506	372	1.0767e-05	4.96791	-4.96791	1566	4.33334e-05	chr12	85673878	85674700	48177195	FALSE	TRUE
chr12_861442_863413	0.0305344	0.0303258	-0.00020857	6876	-0.0397594	6303	506	372	0.313639	0.50357	-0.50357	6303	0.402469	chr12	861442	863413	861442	TRUE	FALSE
chr12_88429105_88429606	0.0524209	0.0517334	-0.000687514	5142	-0.0508734	5726.5	506	372	0.197289	0.704896	-0.704896	5726.5	0.2746	chr12	88429105	88429606	45422289	FALSE	FALSE
chr12_8849963_8851403	0.0255307	0.0263493	0.000818592	9307	0.0683837	9897	506	372	0.0830721	1.08054	1.08054	9897	0.133402	chr12	8849963	8851403	8849963	TRUE	FALSE
chr12_88535735_88536148	0.0394988	0.0386689	-0.00082995	4816	-0.0557716	5474.5	506	372	0.157519	0.802666	-0.802666	5475	0.227424	chr12	88535735	88536148	45315747	FALSE	FALSE
chr12_88973460_88974666	0.0579329	0.0511173	-0.00681556	2517	-0.140433	2152	506	372	0.000371829	3.42966	-3.42966	2152	0.00113093	chr12	88973460	88974666	44877229	FALSE	FALSE
chr12_89745168_89748144	0.0472846	0.046945	-0.000339575	6345	-0.0605848	5189	506	372	0.124671	0.904235	-0.904235	5189	0.187845	chr12	89745168	89748144	44103751	FALSE	FALSE
chr12_89919012_89919904	0.0204292	0.0201433	-0.000285828	6560	-0.0869565	3857	506	372	0.0275326	1.56015	-1.56015	3857	0.0521291	chr12	89919012	89919904	43931991	FALSE	FALSE
chr12_90101436_90104065	0.033215	0.0323662	-0.000848852	4771	-0.07155	4623	506	372	0.0697723	1.15632	-1.15632	4623	0.114974	chr12	90101436	90104065	43747830	FALSE	FALSE
chr12_9102150_9102803	0.0334366	0.0336559	0.000219356	8376	-0.00598198	7897	506	372	0.879592	0.0557185	-0.0557185	7897	0.9083	chr12	9102150	9102803	9102150	TRUE	FALSE
chr12_9217328_9217715	0.151945	0.196049	0.0441047	12588	0.223012	12424	506	372	1.58247e-08	7.80066	7.80066	12424	1.01504e-07	chr12	9217328	9217715	9217328	TRUE	FALSE
chr12_92538710_92540333	0.0436785	0.0432088	-0.000469726	5842	-0.0627417	5080	506	372	0.111806	0.951537	-0.951537	5080	0.171552	chr12	92538710	92540333	41311562	FALSE	FALSE
chr12_93322342_93323498	0.0374019	0.0357032	-0.00169869	3676	-0.158847	1784	506	372	5.67284e-05	4.2462	-4.2462	1784	0.000201759	chr12	93322342	93323498	40528397	FALSE	FALSE
chr12_93834935_93836089	0.0304618	0.0302374	-0.000224369	6804	-0.0853946	3948.5	506	372	0.0304417	1.51653	-1.51653	3949	0.0566553	chr12	93834935	93836089	40015806	FALSE	FALSE
chr12_93861204_93861539	0.0281678	0.0282964	0.000128623	8111	-0.0430533	6127	506	372	0.275228	0.560307	-0.560307	6127	0.361781	chr12	93861204	93861539	39990356	FALSE	FALSE
chr12_93963963_93967395	0.0984373	0.16018	0.0617429	12862	0.267542	12891	506	372	1.19311e-11	10.9233	10.9233	12891	1.26968e-10	chr12	93963963	93967395	39884500	FALSE	TRUE
chr12_9436217_9436654	0.0599862	0.0607009	0.000714686	9169	-0.0347125	6557	506	372	0.379025	0.421333	-0.421333	6557	0.469604	chr12	9436217	9436654	9436217	TRUE	FALSE
chr12_94495833_94496230	0.0481087	0.0479126	-0.000196047	6922	-0.0322793	6682.5	506	372	0.413344	0.383689	-0.383689	6683	0.503106	chr12	94495833	94496230	39355665	FALSE	FALSE
chr12_94541727_94544000	0.061539	0.0436938	-0.0178453	1790	-0.239014	844	506	372	1.37866e-09	8.86054	-8.86054	844	1.05162e-08	chr12	94541727	94544000	39307895	FALSE	FALSE
chr12_94853336_94854307	0.0312892	0.0308927	-0.000396499	6113	-0.0819946	4097.5	506	372	0.0376987	1.42367	-1.42367	4097.5	0.0681756	chr12	94853336	94854307	38997588	FALSE	FALSE
chr12_95397382_95397611	0.0354982	0.0375557	0.00205753	9988	0.166204	11634	506	372	2.5254e-05	4.59767	4.59767	11634	9.52173e-05	chr12	95397382	95397611	38454284	FALSE	FALSE
chr12_95466650_95467464	0.0245218	0.0242353	-0.000286425	6557	-0.097773	3468	506	372	0.0132107	1.87907	-1.87907	3466	0.0273146	chr12	95466650	95467464	38384431	FALSE	FALSE
chr12_95610834_95611997	0.0295123	0.0289916	-0.00052074	5661	-0.112627	2914	506	372	0.00431004	2.36552	-2.36552	2913	0.0102166	chr12	95610834	95611997	38239898	FALSE	FALSE
chr12_95867584_95868019	0.0277409	0.0269927	-0.000748215	5006	-0.105476	3177	506	372	0.00751119	2.12429	-2.12429	3176	0.0166592	chr12	95867584	95868019	37983876	FALSE	FALSE
chr12_95941906_95942979	0.242198	0.410779	0.168581	13416	0.202017	12142	506	372	3.05178e-07	6.51545	6.51545	12142	1.5834e-06	chr12	95941906	95942979	37908916	FALSE	TRUE
chr12_9600415_9601259	0.0634603	0.063263	-0.000197232	6916	-0.048334	5847.5	506	372	0.220595	0.656405	-0.656405	5847.5	0.301736	chr12	9600415	9601259	9600415	TRUE	FALSE
chr12_96183873_96185199	0.0352354	0.0348997	-0.000335652	6363	-0.0283321	6887	506	372	0.472772	0.325348	-0.325348	6887	0.559798	chr12	96183873	96185199	37666696	FALSE	FALSE
chr12_96252555_96253029	0.0334546	0.0334325	-2.20239e-05	7585	-0.0294955	6831.5	506	372	0.454783	0.342196	-0.342196	6831.5	0.542767	chr12	96252555	96253029	37598866	FALSE	FALSE
chr12_96336245_96337411	0.0462895	0.047019	0.00072946	9191	0.0179566	8717	506	372	0.649112	0.18768	0.18768	8717	0.719071	chr12	96336245	96337411	37514484	FALSE	FALSE
chr12_96793191_96794530	0.0569481	0.0542238	-0.00272426	3202	-0.143004	2095	506	372	0.00028954	3.53829	-3.53829	2095	0.000899425	chr12	96793191	96794530	37057365	FALSE	FALSE
chr12_96883286_96883737	0.0541374	0.0352565	-0.0188809	1743	-0.189532	1360	506	372	1.55695e-06	5.80773	-5.80773	1360	7.20109e-06	chr12	96883286	96883737	36968158	FALSE	FALSE
chr12_97300802_97301287	0.0283641	0.0287378	0.000373684	8699	0.0165912	8672	506	372	0.674201	0.171211	0.171211	8672	0.740914	chr12	97300802	97301287	36550608	FALSE	FALSE
chr12_9800543_9800852	0.0314343	0.030786	-0.000648338	5253	-0.0815589	4114	506	372	0.0387271	1.41198	-1.41198	4114	0.069784	chr12	9800543	9800852	9800543	TRUE	FALSE
[truncated: 11,550 more rows]

## Sheet: LOLA_TERTp_Core
Supplementary Table S7b: TERTp methylation LOLA Core output
Region enrichment analysis with the LOLA Core sets for TERTp-demethylated CGIs
	userSet	dbSet	collection	pValueLog	oddsRatio	support	rnkPV	rnkOR	rnkSup	maxRnk	meanRnk	b	c	d	description	cellType	tissue	antibody	treatment	dataSource	filename	size	id	axis_label	pval	qval	-log10_qval
0	demeth_tcga_tertp.bed	430	encode_segmentation	159.024	6.29143	714	1	101	10	101	37.3	3564	286	8983	Repressed Segments	HeLa-S3				ENCODE segmentation	Helas3_R.bed	1594290	Repressed Segments_430	Repressed Segments	9.46152e-160	2.84981e-156	155.545
1	demeth_tcga_tertp.bed	416	encode_segmentation	146.89	5.75907	673	2	130	13	130	48.3	3303	327	9244	Repressed Segments	GM12878				ENCODE segmentation	Gm12878_R.bed	719258	Repressed Segments_416	Repressed Segments	1.2888e-147	1.94093e-144	143.712
2	demeth_tcga_tertp.bed	451	encode_segmentation	135.273	5.33537	631	3	134	19	134	52	3045	369	9502	Repressed Segments	K562				ENCODE segmentation	K562_R.bed	459545	Repressed Segments_451	Repressed Segments	5.33527e-136	5.35661e-133	132.271
3	demeth_tcga_tertp.bed	437	encode_segmentation	114.25	4.66802	577	4	150	23	150	59	2837	423	9710	Repressed Segments	Hepg2				ENCODE segmentation	Hepg2_R.bed	346815	Repressed Segments_437	Repressed Segments	5.61735e-115	4.22986e-112	111.374
4	demeth_tcga_tertp.bed	495	encode_tfbs	105.237	4.87227	438	5	143	43	143	63.7	1730	562	10817	ChIP NHEK EZH2_(39875)	NHEK		EZH2_(39875)	None		wgEncodeAwgTfbsBroadNhekEzh239875UniPk.narrowPeak	7978	ChIP NHEK EZH2_(39875)_495	ChIP NHEK EZH2_(39875)	5.79872e-106	3.49315e-103	102.457
5	demeth_tcga_tertp.bed	177	cistrome_epigenome	83.8182	4.45962	362	6	159	59	159	74.7	1416	638	11131	cistrome_epigenome MCF-7 H3K27me3	MCF-7	breast	H3K27me3	E2(3hr)		Human_MCF-7_H3K27me3_E2-3hr_Liu.bed	49075	cistrome_epigenome MCF-7 H3K27me3_177	cistrome_epigenome MCF-7 H3K27me3	1.51968e-84	7.6288e-82	81.1175
6	demeth_tcga_tertp.bed	149	cistrome_epigenome	80.0363	3.57703	566	7	202	27	202	78.7	3352	434	9195	cistrome_epigenome APL164 cells H3K27me3	APL164 cells	hematopoietic stem cell	H3K27me3	ATRA(48hr)		Human_APL164-cells_H3K27me3_ATRA-48hr_Stunnenberg.bed	39984	cistrome_epigenome APL164 cells H3K27me3_149	cistrome_epigenome APL164 cells H3K27me3	9.19792e-81	3.95773e-78	77.4026
7	demeth_tcga_tertp.bed	470	encode_tfbs	77.7993	4.76098	300	8	146	90	146	81.3	1036	700	11511	ChIP HMEC EZH2_(39875)	HMEC		EZH2_(39875)	None		wgEncodeAwgTfbsBroadHmecEzh239875UniPk.narrowPeak	4626	ChIP HMEC EZH2_(39875)_470	ChIP HMEC EZH2_(39875)	1.58744e-78	5.97672e-76	75.2235
8	demeth_tcga_tertp.bed	444	encode_segmentation	67.4497	3.40495	441	9	206	42	206	85.7	2360	559	10187	Repressed Segments	Huvec				ENCODE segmentation	Huvec_R.bed	1593561	Repressed Segments_444	Repressed Segments	3.5506e-68	1.18827e-65	64.9251
9	demeth_tcga_tertp.bed	421	encode_segmentation	64.9075	3.12031	616	10	229	20	229	86.3	4260	384	8287	Enhancers Segments	H1hesc				ENCODE segmentation	H1hesc_E.bed	52106	Enhancers Segments_421	Enhancers Segments	1.23736e-65	3.72691e-63	62.4287
10	demeth_tcga_tertp.bed	3005	ucsc_features	53.3826	3.33719	322	13	207	73	207	97.7	1563	678	10984	UCSC LaminB1 Lads						laminB1Lads.bed	1302	UCSC LaminB1 Lads_3005	UCSC LaminB1 Lads	4.14374e-54	9.60073e-52	51.0177
11	demeth_tcga_tertp.bed	176	cistrome_epigenome	59.9925	4.11788	265	11	186	112	186	103	1010	735	11537	cistrome_epigenome MCF-7 H3K27me3	MCF-7	breast	H3K27me3	DMSO(3hr)		Human_MCF-7_H3K27me3_DMSO-3hr_Liu.bed	31472	cistrome_epigenome MCF-7 H3K27me3_176	cistrome_epigenome MCF-7 H3K27me3	1.01746e-60	2.78598e-58	57.555
12	demeth_tcga_tertp.bed	159	cistrome_epigenome	58.5418	4.48695	230	12	158	154	158	108	783	770	11764	cistrome_epigenome LnCaP H3K27me3	LnCaP	prostate	H3K27me3	R1881(16hr)		Human_LnCaP_H3K27me3_R1881-16hr_Chinnaiyan.bed	11283	cistrome_epigenome LnCaP H3K27me3_159	cistrome_epigenome LnCaP H3K27me3	2.87197e-59	7.20863e-57	56.1421
13	demeth_tcga_tertp.bed	476	encode_tfbs	40.5684	2.8663	304	15	241	85	241	114	1659	696	10888	ChIP HUVEC EZH2_(39875)	HUVEC		EZH2_(39875)	None		wgEncodeAwgTfbsBroadHuvecEzh239875UniPk.narrowPeak	6234	ChIP HUVEC EZH2_(39875)_476	ChIP HUVEC EZH2_(39875)	2.70167e-41	5.42495e-39	38.2656
14	demeth_tcga_tertp.bed	179	cistrome_epigenome	24.5744	2.09151	742	28	312	7	312	116	7264	258	5283	cistrome_epigenome MCF-7 H3K4me1	MCF-7	breast	H3K4me1	E2(3hr)		Human_MCF-7_H3K4me1_E2-3hr_Liu.bed	95807	cistrome_epigenome MCF-7 H3K4me1_179	cistrome_epigenome MCF-7 H3K4me1	2.66448e-25	2.86622e-23	22.5427
15	demeth_tcga_tertp.bed	498	encode_tfbs	32.0855	2.58826	281	19	253	102	253	125	1646	719	10901	ChIP NHLF EZH2_(39875)	NHLF		EZH2_(39875)	None		wgEncodeAwgTfbsBroadNhlfEzh239875UniPk.narrowPeak	7030	ChIP NHLF EZH2_(39875)_498	ChIP NHLF EZH2_(39875)	8.21299e-33	1.30197e-30	29.8854
16	demeth_tcga_tertp.bed	491	encode_tfbs	29.2659	2.43531	290	21	276	94	276	130	1802	710	10745	ChIP NH-A EZH2_(39875)	NH-A		EZH2_(39875)	None		wgEncodeAwgTfbsBroadNhaEzh239875UniPk.narrowPeak	6493	ChIP NH-A EZH2_(39875)_491	ChIP NH-A EZH2_(39875)	5.42086e-30	7.77506e-28	27.1093
17	demeth_tcga_tertp.bed	461	encode_tfbs	28.8635	2.52206	260	22	257	118	257	132	1534	740	11013	ChIP H1-hESC EZH2_(39875)	H1-hESC		EZH2_(39875)	None		wgEncodeAwgTfbsBroadH1hescEzh239875UniPk.narrowPeak	6370	ChIP H1-hESC EZH2_(39875)_461	ChIP H1-hESC EZH2_(39875)	1.36937e-29	1.87479e-27	26.727
18	demeth_tcga_tertp.bed	150	cistrome_epigenome	26.1265	2.27474	301	25	283	88	283	132	1997	699	10550	cistrome_epigenome APL164 cells H3K27me3	APL164 cells	hematopoietic stem cell	H3K27me3	No treatment		Human_APL164-cells_H3K27me3_No-treatment_Stunnenberg.bed	15071	cistrome_epigenome APL164 cells H3K27me3_150	cistrome_epigenome APL164 cells H3K27me3	7.47264e-27	9.00304e-25	24.0456
19	demeth_tcga_tertp.bed	493	encode_tfbs	28.7737	2.49866	265	23	268	112	268	134	1582	735	10965	ChIP NHDF-Ad EZH2_(39875)	NHDF-Ad		EZH2_(39875)	None		wgEncodeAwgTfbsBroadNhdfadEzh239875UniPk.narrowPeak	5739	ChIP NHDF-Ad EZH2_(39875)_493	ChIP NHDF-Ad EZH2_(39875)	1.68373e-29	2.20496e-27	26.6566
20	demeth_tcga_tertp.bed	442	encode_segmentation	17.0805	1.81331	387	34	331	52	331	139	3240	613	9307	Enhancers Segments	Huvec				ENCODE segmentation	Huvec_E.bed	53526	Enhancers Segments_442	Enhancers Segments	8.30752e-18	7.35949e-16	15.1332
21	demeth_tcga_tertp.bed	1032	encode_tfbs	33.368	3.16308	197	18	215	200	215	144	903	803	11644	ChIP NT2-D1 SUZ12	NT2-D1		SUZ12	None		wgEncodeAwgTfbsSydhNt2d1Suz12UcdUniPk.narrowPeak	3308	ChIP NT2-D1 SUZ12_1032	ChIP NT2-D1 SUZ12	4.28566e-34	7.17134e-32	31.1444
22	demeth_tcga_tertp.bed	1197	sheffield_dnase	33.7467	3.2807	188	17	211	219	219	149	827	812	11720	Stem and SK-N-SH_RA						1057.bed	4647	Stem and SK-N-SH_RA_1197	Stem and SK-N-SH_RA	1.79194e-34	3.1749e-32	31.4983
23	demeth_tcga_tertp.bed	435	encode_segmentation	13.4258	1.70683	352	43	345	62	345	150	3029	648	9518	Enhancers Segments	Hepg2				ENCODE segmentation	Hepg2_E.bed	47879	Enhancers Segments_435	Enhancers Segments	3.75109e-14	2.62751e-12	11.5805
24	demeth_tcga_tertp.bed	1195	sheffield_dnase	41.0286	4.36323	159	14	160	290	290	155	521	841	12026	Brain						1055.bed	5748	Brain_1195	Brain	9.36292e-42	2.01437e-39	38.6959
25	demeth_tcga_tertp.bed	474	encode_tfbs	28.1869	2.82938	197	24	243	200	243	156	1001	803	11546	ChIP HSMMtube EZH2_(39875)	HSMMtube		EZH2_(39875)	None		wgEncodeAwgTfbsBroadHsmmtEzh239875UniPk.narrowPeak	2700	ChIP HSMMtube EZH2_(39875)_474	ChIP HSMMtube EZH2_(39875)	6.50284e-29	8.16106e-27	26.0883
26	demeth_tcga_tertp.bed	178	cistrome_epigenome	6.71525	1.39944	521	69	384	32	384	162	5487	479	7060	cistrome_epigenome MCF-7 H3K4me1	MCF-7	breast	H3K4me1	DMSO(3hr)		Human_MCF-7_H3K4me1_DMSO-3hr_Liu.bed	127623	cistrome_epigenome MCF-7 H3K4me1_178	cistrome_epigenome MCF-7 H3K4me1	1.92642e-07	8.40925e-06	5.07524
27	demeth_tcga_tertp.bed	371	codex	21.868	2.44515	197	29	273	200	273	167	1144	803	11403	K562 erythrocytic leukaemia cells (ATCC CCL-243) were grown according to standar	Embryonic Stem Cell		EZH2		GSE32509	GSM831028_EZH2.bed	3205	K562 erythrocytic leukaemia cells (ATCC CCL-243) were grown according to standar_371	K562 erythrocytic leukaemia cells (ATCC CCL-243) w	1.35506e-22	1.40739e-20	19.8516
28	demeth_tcga_tertp.bed	803	encode_tfbs	10.7536	1.69918	252	52	346	125	346	174	2076	748	10471	ChIP H1-hESC CtBP2	H1-hESC		CtBP2	None		wgEncodeAwgTfbsSydhH1hescCtbp2UcdUniPk.narrowPeak	7089	ChIP H1-hESC CtBP2_803	ChIP H1-hESC CtBP2	1.76374e-11	1.02161e-09	8.99071
29	demeth_tcga_tertp.bed	3009	ucsc_features	4.55655	1.3063	522	90	409	30	409	176	5713	478	6834	UCSC Repeat Masker						rmsk.bed	5298130	UCSC Repeat Masker_3009	UCSC Repeat Masker	2.77617e-05	0.000929093	3.03194
30	demeth_tcga_tertp.bed	1368	sheffield_dnase	38.6608	5.36379	120	16	133	404	404	184	311	880	12236	SK-N-SH_RA						1255.bed	2013	SK-N-SH_RA_1368	SK-N-SH_RA	2.18356e-39	4.11055e-37	36.3861
31	demeth_tcga_tertp.bed	158	cistrome_epigenome	31.7375	3.94876	135	20	187	350	350	186	477	865	12070	cistrome_epigenome LnCaP H3K27me3	LnCaP	prostate	H3K27me3	EtOH(16hr)		Human_LnCaP_H3K27me3_EtOH-16hr_Chinnaiyan.bed	9193	cistrome_epigenome LnCaP H3K27me3_158	cistrome_epigenome LnCaP H3K27me3	1.83029e-32	2.75642e-30	29.5597
32	demeth_tcga_tertp.bed	378	codex	17.4561	2.32274	169	33	282	259	282	191	1010	831	11537	K562 erythrocytic leukaemia cells (ATCC CCL-243) were grown according to standar	Embryonic Stem Cell		SUZ12		GSE32509	GSM831042_SUZ12.bed	2682	K562 erythrocytic leukaemia cells (ATCC CCL-243) were grown according to standar_378	K562 erythrocytic leukaemia cells (ATCC CCL-243) w	3.49882e-18	3.19346e-16	15.4957
33	demeth_tcga_tertp.bed	221	cistrome_epigenome	25.8458	3.50209	126	26	203	387	387	205	496	874	12051	cistrome_epigenome metastatic prostate cancer tissue H3K27me3	metastatic prostate cancer tissue	prostate	H3K27me3	No treatment		Human_metastatic-prostate-cancer-tissue_H3K27me3_No-treatment_Chinnaiyan.bed	15510	cistrome_epigenome metastatic prostate cancer tissue H3K27me3_221	cistrome_epigenome metastatic prostate cancer tiss	1.42611e-26	1.65209e-24	23.782
34	demeth_tcga_tertp.bed	210	cistrome_epigenome	24.9534	4.29346	94	27	161	485	485	224	296	906	12251	cistrome_epigenome VCaP H3K27me3	VCaP	prostate	H3K27me3	regular medium		Human_VCaP_H3K27me3_regular-medium_Chinnaiyan.bed	14547	cistrome_epigenome VCaP H3K27me3_210	cistrome_epigenome VCaP H3K27me3	1.11331e-25	1.24196e-23	22.9059
35	demeth_tcga_tertp.bed	813	encode_tfbs	15.3025	2.44342	129	37	274	374	374	228	717	871	11830	ChIP H1-hESC SUZ12	H1-hESC		SUZ12	None		wgEncodeAwgTfbsSydhH1hescSuz12UcdUniPk.narrowPeak	4789	ChIP H1-hESC SUZ12_813	ChIP H1-hESC SUZ12	4.98319e-16	4.05659e-14	13.3918
36	demeth_tcga_tertp.bed	468	encode_tfbs	14.5811	2.36425	131	39	279	368	368	229	752	869	11795	ChIP HepG2 EZH2_(39875)	HepG2		EZH2_(39875)	None		wgEncodeAwgTfbsBroadHepg2Ezh239875UniPk.narrowPeak	3286	ChIP HepG2 EZH2_(39875)_468	ChIP HepG2 EZH2_(39875)	2.62345e-15	2.02611e-13	12.6933
37	demeth_tcga_tertp.bed	3010	ucsc_features	1.9313	1.19087	261	163	432	117	432	237	2870	739	9677	UCSC Simple repeats						simpleRepeat.bed	962714	UCSC Simple repeats_3010	UCSC Simple repeats	0.0117137	0.216453	0.664637
38	demeth_tcga_tertp.bed	212	cistrome_epigenome	2.15434	1.21698	236	155	428	141	428	241	2540	764	10007	cistrome_epigenome VCaP H3K4me1	VCaP	prostate	H3K4me1	regular medium		Human_VCaP_H3K4me1_regular-medium_Chinnaiyan.bed	63143	cistrome_epigenome VCaP H3K4me1_212	cistrome_epigenome VCaP H3K4me1	0.00700913	0.136203	0.865813
39	demeth_tcga_tertp.bed	414	encode_segmentation	2.76262	1.28058	205	128	413	190	413	244	2103	795	10444	Enhancers Segments	GM12878				ENCODE segmentation	Gm12878_E.bed	51760	Enhancers Segments_414	Enhancers Segments	0.00172735	0.0406467	1.39098
40	demeth_tcga_tertp.bed	599	encode_tfbs	7.52676	1.74097	141	63	343	335	343	247	1081	859	11466	ChIP H1-hESC NRSF	H1-hESC		NRSF	None		wgEncodeAwgTfbsHaibH1hescNrsfV0416102UniPk.narrowPeak	13286	ChIP H1-hESC NRSF_599	ChIP H1-hESC NRSF	2.97334e-08	1.42154e-06	5.84724
41	demeth_tcga_tertp.bed	1617	sheffield_dnase	18.5066	3.63225	83	32	193	530	530	252	305	917	12242	Weak Ostoblast						1524.bed	1354	Weak Ostoblast_1617	Weak Ostoblast	3.11463e-19	2.93164e-17	16.5329
42	demeth_tcga_tertp.bed	190	cistrome_epigenome	13.6332	2.60905	99	41	252	469	469	254	507	901	12040	cistrome_epigenome MCF-7 H3K9me3	MCF-7	breast	H3K9me3	E2(3hr)		Human_MCF-7_H3K9me3_E2-3hr_Liu.bed	47408	cistrome_epigenome MCF-7 H3K9me3_190	cistrome_epigenome MCF-7 H3K9me3	2.32689e-14	1.70941e-12	11.7672
43	demeth_tcga_tertp.bed	3000	ucsc_features	0.777716	1.07999	758	312	453	6	453	257	9330	242	3217	UCSC coriellDelDup table						coriellDelDup.bed	957	UCSC coriellDelDup table_3000	UCSC coriellDelDup table	0.166834	1	0
44	demeth_tcga_tertp.bed	2525	sheffield_dnase	12.8534	2.53296	98	47	256	472	472	258	516	902	12031	Weak stem and endothelial						410.bed	9166	Weak stem and endothelial_2525	Weak stem and endothelial	1.40163e-13	8.98239e-12	11.0466
45	demeth_tcga_tertp.bed	1194	sheffield_dnase	13.3016	2.64233	94	44	251	485	485	260	474	906	12073	Weak SK-N-SH_RA specific						1054.bed	1361	Weak SK-N-SH_RA specific_1194	Weak SK-N-SH_RA specific	4.99325e-14	3.4181e-12	11.4662
46	demeth_tcga_tertp.bed	472	encode_tfbs	12.6897	2.4531	103	49	272	459	459	260	561	897	11986	ChIP HSMM EZH2_(39875)	HSMM		EZH2_(39875)	None		wgEncodeAwgTfbsBroadHsmmEzh239875UniPk.narrowPeak	1540	ChIP HSMM EZH2_(39875)_472	ChIP HSMM EZH2_(39875)	2.04326e-13	1.25598e-11	10.901
47	demeth_tcga_tertp.bed	189	cistrome_epigenome	13.6105	2.85844	84	42	242	527	527	270	390	916	12157	cistrome_epigenome MCF-7 H3K9me3	MCF-7	breast	H3K9me3	DMSO(3hr)		Human_MCF-7_H3K9me3_DMSO-3hr_Liu.bed	31814	cistrome_epigenome MCF-7 H3K9me3_189	cistrome_epigenome MCF-7 H3K9me3	2.45215e-14	1.75854e-12	11.7548
48	demeth_tcga_tertp.bed	369	codex	9.96681	2.20954	98	53	290	472	472	272	588	902	11959	K562 erythrocytic leukaemia cells (ATCC CCL-243) were grown according to standar	Erythrocytic leukaemia cells		SUZ12		GSE32509	GSM831021_SUZ12.bed	2804	K562 erythrocytic leukaemia cells (ATCC CCL-243) were grown according to standar_369	K562 erythrocytic leukaemia cells (ATCC CCL-243) w	1.07942e-10	6.13435e-09	8.21223
49	demeth_tcga_tertp.bed	1405	sheffield_dnase	20.0893	8.24309	43	30	84	707	707	274	68	957	12479	Brain;Stem;Fibroblast;Endothelial						1304.bed	261	Brain;Stem;Fibroblast;Endothelial_1405	Brain;Stem;Fibroblast;Endothelial	8.14081e-21	8.17338e-19	18.0876
50	demeth_tcga_tertp.bed	1280	sheffield_dnase	18.9537	8.73592	39	31	76	734	734	280	58	961	12489	Brain;Stem						1155.bed	409	Brain;Stem_1280	Brain;Stem	1.1125e-19	1.08092e-17	16.9662
51	demeth_tcga_tertp.bed	200	cistrome_epigenome	2.88873	1.34798	142	122	401	331	401	285	1372	858	11175	cistrome_epigenome NB4 cells H3K9me3	NB4 cells	hematopoietic stem cell	H3K9me3	No treatment		Human_NB4-cells_H3K9me3_No-treatment_Stunnenberg.bed	107924	cistrome_epigenome NB4 cells H3K9me3_200	cistrome_epigenome NB4 cells H3K9me3	0.00129201	0.0318978	1.49624
52	demeth_tcga_tertp.bed	1380	sheffield_dnase	16.2369	6.83835	39	35	96	734	734	288	74	961	12473	Brain;Stem						1266.bed	260	Brain;Stem_1380	Brain;Stem	5.79611e-17	4.98797e-15	14.3021
53	demeth_tcga_tertp.bed	2684	sheffield_dnase	14.8712	5.25052	44	38	135	698	698	290	109	956	12438	SK-N-SH_RA and Medullo specific						605.bed	358	SK-N-SH_RA and Medullo specific_2684	SK-N-SH_RA and Medullo specific	1.34528e-15	1.06631e-13	12.9721
54	demeth_tcga_tertp.bed	458	encode_tfbs	9.29706	2.33205	80	55	281	543	543	293	451	920	12096	ChIP GM12878 EZH2_(39875)	GM12878		EZH2_(39875)	None		wgEncodeAwgTfbsBroadGm12878Ezh239875UniPk.narrowPeak	2472	ChIP GM12878 EZH2_(39875)_458	ChIP GM12878 EZH2_(39875)	5.04593e-10	2.76334e-08	7.55857
55	demeth_tcga_tertp.bed	1144	sheffield_dnase	12.6919	4.50069	43	48	156	707	707	304	124	957	12423	Stem cell specific (weak)						10.bed	63200	Stem cell specific (weak)_1144	Stem cell specific (weak)	2.03264e-13	1.25598e-11	10.901
56	demeth_tcga_tertp.bed	1415	sheffield_dnase	14.4584	8.4023	30	40	77	799	799	305	46	970	12501	Complex tissue specific						1315.bed	124	Complex tissue specific_1415	Complex tissue specific	3.4798e-15	2.62029e-13	12.5817
57	demeth_tcga_tertp.bed	604	encode_tfbs	0.555891	1.04559	301	375	465	88	465	309	3660	699	8887	ChIP H1-hESC Rad21	H1-hESC		Rad21	None		wgEncodeAwgTfbsHaibH1hescRad21V0416102UniPk.narrowPeak	75680	ChIP H1-hESC Rad21_604	ChIP H1-hESC Rad21	0.278041	1	0
58	demeth_tcga_tertp.bed	373	codex	0.276356	0.997998	812	449	474	4	474	309	10192	188	2355	K562 erythrocytic leukaemia cells (ATCC CCL-243) were grown according to standar	Embryonic Stem Cell		KDM4A		GSE32509	GSM831035_KDM4A.bed	20642	K562 erythrocytic leukaemia cells (ATCC CCL-243) were grown according to standar_373	K562 erythrocytic leukaemia cells (ATCC CCL-243) w	0.529229	1	0
59	demeth_tcga_tertp.bed	1244	sheffield_dnase	6.72174	1.9911	80	68	322	543	543	311	525	920	12022	Weak stem specific						111.bed	16567	Weak stem specific_1244	Weak stem specific	1.89785e-07	8.40637e-06	5.07539
60	demeth_tcga_tertp.bed	1216	sheffield_dnase	4.60555	1.65209	92	88	351	495	495	311	725	908	11822	Weak						1078.bed	13903	Weak_1216	Weak	2.48001e-05	0.00084884	3.07117
61	demeth_tcga_tertp.bed	434	encode_segmentation	5.20241	1.74335	88	80	342	513	513	312	658	912	11889	CTCF Segments	Hepg2				ENCODE segmentation	Hepg2_CTCF.bed	72023	CTCF Segments_434	CTCF Segments	6.27465e-06	0.000236241	3.62665
62	demeth_tcga_tertp.bed	3002	ucsc_features	0.248886	0.9897	932	463	477	2	477	314	11702	68	845	UCSC Evo CpG islands						evoCpg.bed	129301	UCSC Evo CpG islands_3002	UCSC Evo CpG islands	0.563786	1	0
63	demeth_tcga_tertp.bed	1154	sheffield_dnase	15.3899	16.3773	23	36	43	872	872	317	18	977	12529	Brain;Stem;Epithelial						101.bed	152	Brain;Stem;Epithelial_1154	Brain;Stem;Epithelial	4.0744e-16	3.40892e-14	13.4674
64	demeth_tcga_tertp.bed	181	cistrome_epigenome	3.57799	1.519	95	104	364	484	484	317	811	905	11736	cistrome_epigenome MCF-7 H3K4me2	MCF-7	breast	H3K4me2	E2(6hr)		Human_MCF-7_H3K4me2_E2-6hr_Barton.bed	54266	cistrome_epigenome MCF-7 H3K4me2_181	cistrome_epigenome MCF-7 H3K4me2	0.00026425	0.00765308	2.11616
65	demeth_tcga_tertp.bed	2073	sheffield_dnase	12.9661	8.78452	26	46	75	838	838	320	38	974	12509	Brain;Stem;Epithelial						2092.bed	203	Brain;Stem;Epithelial_2073	Brain;Stem;Epithelial	1.08106e-13	7.07861e-12	11.1501
66	demeth_tcga_tertp.bed	2522	sheffield_dnase	12.4816	7.34515	28	50	90	819	819	320	49	972	12498	Weak stem specific						407.bed	1714	Weak stem specific_2522	Weak stem specific	3.29908e-13	1.98737e-11	10.7017
67	demeth_tcga_tertp.bed	182	cistrome_epigenome	3.42061	1.50333	94	108	366	485	485	320	810	906	11737	cistrome_epigenome MCF-7 H3K4me2	MCF-7	breast	H3K4me2	EtOH(6hr)		Human_MCF-7_H3K4me2_EtOH-6hr_Barton.bed	36821	cistrome_epigenome MCF-7 H3K4me2_182	cistrome_epigenome MCF-7 H3K4me2	0.000379656	0.0105882	1.97518
68	demeth_tcga_tertp.bed	707	encode_tfbs	1.56342	1.21326	135	186	430	350	430	322	1430	865	11117	ChIP PFSK-1 NRSF	PFSK-1		NRSF	None		wgEncodeAwgTfbsHaibPfsk1NrsfPcr2xUniPk.narrowPeak	11390	ChIP PFSK-1 NRSF_707	ChIP PFSK-1 NRSF	0.0273261	0.442506	0.35408
69	demeth_tcga_tertp.bed	364	codex	4.56744	1.69808	82	89	347	534	534	323	627	918	11920	K562 erythrocytic leukaemia cells (ATCC CCL-243) were grown according to standar	Erythrocytic leukaemia cells		REST		GSE32509	GSM831015_REST.bed	5610	K562 erythrocytic leukaemia cells (ATCC CCL-243) were grown according to standar_364	K562 erythrocytic leukaemia cells (ATCC CCL-243) w	2.70743e-05	0.000916267	3.03798
70	demeth_tcga_tertp.bed	423	encode_segmentation	2.77639	1.41827	96	127	382	478	478	329	874	904	11673	Repressed Segments	H1hesc				ENCODE segmentation	H1hesc_R.bed	543759	Repressed Segments_423	Repressed Segments	0.00167342	0.0396877	1.40134
71	demeth_tcga_tertp.bed	703	encode_tfbs	2.67671	1.40094	98	131	383	472	472	329	903	902	11644	ChIP PANC-1 NRSF	PANC-1		NRSF	None		wgEncodeAwgTfbsHaibPanc1NrsfPcr2xUniPk.narrowPeak	5507	ChIP PANC-1 NRSF_703	ChIP PANC-1 NRSF	0.00210517	0.0484029	1.31513
72	demeth_tcga_tertp.bed	448	encode_segmentation	3.05025	1.46983	90	115	371	505	505	330	791	910	11756	CTCF Segments	K562				ENCODE segmentation	K562_CTCF.bed	70842	CTCF Segments_448	CTCF Segments	0.000890745	0.0232691	1.63322
73	demeth_tcga_tertp.bed	22	cistrome_cistrome	0.281821	0.998257	342	448	473	69	473	330	4296	658	8251	cistrome_cistrome HepG2 liver cells FoxA2	HepG2 liver cells	liver	FoxA2	No treatment		Human_HepG2-liver-cells_FoxA2_No-treatment_Wadelius.bed	9115	cistrome_cistrome HepG2 liver cells FoxA2_22	cistrome_cistrome HepG2 liver cells FoxA2	0.522611	1	0
74	demeth_tcga_tertp.bed	2517	sheffield_dnase	13.095	12.2435	22	45	70	887	887	334	23	978	12524	Brain;Stem						401.bed	200	Brain;Stem_2517	Brain;Stem	8.03601e-14	5.37877e-12	11.2693
75	demeth_tcga_tertp.bed	2438	sheffield_dnase	9.33586	4.77335	29	54	145	810	810	336	78	971	12469	Stem						311.bed	1472	Stem_2438	Stem	4.61467e-10	2.57396e-08	7.5894
76	demeth_tcga_tertp.bed	2935	sheffield_dnase	7.95984	3.18171	39	59	214	734	734	336	158	961	12389	DNase Hepatocyte specific						927.bed	33964	DNase Hepatocyte specific_2935	DNase Hepatocyte specific	1.09688e-08	5.59969e-07	6.25184
77	demeth_tcga_tertp.bed	1152	sheffield_dnase	3.53226	1.57109	80	107	357	543	543	336	658	920	11889	Weak HepG2 specific						1008.bed	23313	Weak HepG2 specific_1152	Weak HepG2 specific	0.000293586	0.00826431	2.08279
78	demeth_tcga_tertp.bed	2916	sheffield_dnase	7.78362	3.02211	41	60	233	718	718	337	175	959	12372	Medullo and SK-N-SH_RA						905.bed	4884	Medullo and SK-N-SH_RA_2916	Medullo and SK-N-SH_RA	1.6458e-08	8.26191e-07	6.08292
79	demeth_tcga_tertp.bed	2526	sheffield_dnase	7.74906	3.44154	34	62	205	766	766	344	127	966	12420	Stem;Liver						412.bed	803	Stem;Liver_2526	Stem;Liver	1.78215e-08	8.6578e-07	6.06259
80	demeth_tcga_tertp.bed	415	encode_segmentation	3.33331	1.57622	73	112	356	565	565	344	597	927	11950	Promoter Flank Segments	GM12878				ENCODE segmentation	Gm12878_PF.bed	38635	Promoter Flank Segments_415	Promoter Flank Segments	0.000464187	0.0124833	1.90367
81	demeth_tcga_tertp.bed	1423	sheffield_dnase	11.2123	10.6447	20	51	72	912	912	345	24	980	12523	Fibroblast;Brain;Stem;Muscle;Epithelial;Liver;Endothelial;Skin;Bone						1322.bed	154	Fibroblast;Brain;Stem;Muscle;Epithelial;Liver;Endothelial;Skin;Bone_1423	Fibroblast;Brain;Stem;Muscle;Epithelial;Liver;Endo	6.13346e-12	3.62235e-10	9.44101
82	demeth_tcga_tertp.bed	3004	ucsc_features	0.0785892	0.923593	820	563	497	3	563	354	10432	180	2115	UCSC LaminBq						laminB1.bed	2859884	UCSC LaminBq_3004	UCSC LaminBq	0.83447	1	0
83	demeth_tcga_tertp.bed	1147	sheffield_dnase	7.75288	4.50474	25	61	154	849	849	355	71	975	12476	Fibroblast;Brain;Primitive;Hematopoietic;Stem;Epithelial;Muscle;Liver;Endothelia						1001.bed	188	Fibroblast;Brain;Primitive;Hematopoietic;Stem;Epithelial;Muscle;Liver;Endothelia_1147	Fibroblast;Brain;Primitive;Hematopoietic;Stem;Epit	1.76652e-08	8.6578e-07	6.06259
84	demeth_tcga_tertp.bed	2798	sheffield_dnase	8.71218	7.34227	19	56	91	922	922	356	33	981	12514	Stem;Brain						754.bed	442	Stem;Brain_2798	Stem;Brain	1.94009e-09	1.04349e-07	6.98151
85	demeth_tcga_tertp.bed	441	encode_segmentation	2.48908	1.44834	73	136	374	565	565	358	647	927	11900	CTCF Segments	Huvec				ENCODE segmentation	Huvec_CTCF.bed	56516	CTCF Segments_441	CTCF Segments	0.00324282	0.071819	1.14376
86	demeth_tcga_tertp.bed	370	codex	0.688478	1.08168	157	327	452	296	452	358	1843	843	10704	K562 erythrocytic leukaemia cells (ATCC CCL-243) were grown according to standar	Embryonic Stem Cell		CHD1		GSE32509	GSM831025_CHD1.bed	4814	K562 erythrocytic leukaemia cells (ATCC CCL-243) were grown according to standar_370	K562 erythrocytic leukaemia cells (ATCC CCL-243) w	0.204891	1	0
87	demeth_tcga_tertp.bed	2562	sheffield_dnase	8.49733	7.64541	18	57	86	933	933	359	30	982	12517	Epithelial;Fibroblast;Muscle;Brain;Hematopoietic;Primitive;Skin;Stem;Endothelial						45.bed	109	Epithelial;Fibroblast;Muscle;Brain;Hematopoietic;Primitive;Skin;Stem;Endothelial_2562	Epithelial;Fibroblast;Muscle;Brain;Hematopoietic;P	3.18177e-09	1.68132e-07	6.77435
88	demeth_tcga_tertp.bed	2722	sheffield_dnase	8.16625	7.16651	18	58	93	933	933	361	32	982	12515	Brain						654.bed	289	Brain_2722	Brain	6.8195e-09	3.54143e-07	6.45082
89	demeth_tcga_tertp.bed	2959	sheffield_dnase	6.05144	3.07308	30	72	231	799	799	367	125	970	12422	Brain;Primitive;Hematopoietic;Stem;Liver;Epithelial;Endothelial;Prostate;Mammary						952.bed	290	Brain;Primitive;Hematopoietic;Stem;Liver;Epithelial;Endothelial;Prostate;Mammary_2959	Brain;Primitive;Hematopoietic;Stem;Liver;Epithelia	8.88303e-07	3.71607e-05	4.42992
90	demeth_tcga_tertp.bed	1235	sheffield_dnase	4.50561	2.12166	42	93	299	713	713	368	254	958	12293	Stem;Colon;Liver						110.bed	2519	Stem;Colon;Liver_1235	Stem;Colon;Liver	3.1217e-05	0.00101103	2.99524
91	demeth_tcga_tertp.bed	1286	sheffield_dnase	6.50297	3.75846	25	70	189	849	849	369	85	975	12462	Fibroblast;Brain;Primitive;Hematopoietic;Stem;Epithelial;Muscle;Colon;Liver;Endo						1161.bed	196	Fibroblast;Brain;Primitive;Hematopoietic;Stem;Epithelial;Muscle;Colon;Liver;Endo_1286	Fibroblast;Brain;Primitive;Hematopoietic;Stem;Epit	3.14069e-07	1.35139e-05	4.86922
92	demeth_tcga_tertp.bed	1660	sheffield_dnase	5.98772	3.19785	28	74	213	819	819	369	112	972	12435	Stem						157.bed	1295	Stem_1660	Stem	1.02868e-06	4.187e-05	4.3781
93	demeth_tcga_tertp.bed	1040	encode_tfbs	1.05379	1.16027	111	255	436	434	436	375	1219	889	11328	ChIP SH-SY5Y GATA-2	SH-SY5Y		GATA-2	None		wgEncodeAwgTfbsSydhShsy5yGata2UcdUniPk.narrowPeak	35620	ChIP SH-SY5Y GATA-2_1040	ChIP SH-SY5Y GATA-2	0.0883497	1	0
94	demeth_tcga_tertp.bed	2504	sheffield_dnase	5.60368	3.10849	27	76	230	827	827	378	111	973	12436	Epithelial;Fibroblast;Muscle;Brain;Hematopoietic;Primitive;Skin;Stem;Endothelial						39.bed	303	Epithelial;Fibroblast;Muscle;Brain;Hematopoietic;Primitive;Skin;Stem;Endothelial_2504	Epithelial;Fibroblast;Muscle;Brain;Hematopoietic;P	2.4907e-06	9.79819e-05	4.00885
95	demeth_tcga_tertp.bed	449	encode_segmentation	0.537051	1.05579	152	377	455	307	455	380	1821	848	10726	Enhancers Segments	K562				ENCODE segmentation	K562_E.bed	44380	Enhancers Segments_449	Enhancers Segments	0.290368	1	0
96	demeth_tcga_tertp.bed	2913	sheffield_dnase	7.39987	10.3118	13	64	73	1005	1005	381	16	987	12531	Brain						902.bed	464	Brain_2913	Brain	3.98223e-08	1.87414e-06	5.7272
97	demeth_tcga_tertp.bed	2367	sheffield_dnase	6.76128	5.84529	17	67	128	947	947	381	37	983	12510	Epithelial;Fibroblast;Muscle;Brain;Skin;Stem;Endothelial;Liver;Hematopoietic;Pro						2466.bed	254	Epithelial;Fibroblast;Muscle;Brain;Skin;Stem;Endothelial;Liver;Hematopoietic;Pro_2367	Epithelial;Fibroblast;Muscle;Brain;Skin;Stem;Endot	1.73268e-07	7.78929e-06	5.1085
98	demeth_tcga_tertp.bed	2110	sheffield_dnase	5.7826	3.73998	22	75	191	887	887	384	75	978	12472	Epithelial						2142.bed	1960	Epithelial_2110	Epithelial	1.64968e-06	6.62512e-05	4.17881
99	demeth_tcga_tertp.bed	1322	sheffield_dnase	5.60122	4.59855	17	77	151	947	947	392	47	983	12500	Brain;Stem;Liver						1206.bed	156	Brain;Stem;Liver_1322	Brain;Stem;Liver	2.50485e-06	9.79819e-05	4.00885
100	demeth_tcga_tertp.bed	2640	sheffield_dnase	5.50011	4.50243	17	78	155	947	947	393	48	983	12499	Hematopoietic;Stem;Brain						553.bed	185	Hematopoietic;Stem;Brain_2640	Hematopoietic;Stem;Brain	3.16145e-06	0.000122081	3.91335
101	demeth_tcga_tertp.bed	1504	sheffield_dnase	4.72543	2.9417	24	87	235	860	860	394	104	976	12443	Stem;Brain;Liver;Epithelial;Endothelial;Fibroblast;Bone						1405.bed	295	Stem;Brain;Liver;Epithelial;Endothelial;Fibroblast;Bone_1504	Stem;Brain;Liver;Epithelial;Endothelial;Fibroblast	1.8818e-05	0.000651492	3.18609
102	demeth_tcga_tertp.bed	1321	sheffield_dnase	3.70351	2.14975	32	100	297	784	784	394	190	968	12357	Primitive;Hematopoietic;Stem;Liver;Endothelial;Bone;Fibroblast;Brain						1205.bed	380	Primitive;Hematopoietic;Stem;Liver;Endothelial;Bone;Fibroblast;Brain_1321	Primitive;Hematopoietic;Stem;Liver;Endothelial;Bon	0.00019792	0.00596136	2.22465
103	demeth_tcga_tertp.bed	810	encode_tfbs	0.192167	0.972871	192	492	480	212	492	395	2463	808	10084	ChIP H1-hESC Rad21	H1-hESC		Rad21	None		wgEncodeAwgTfbsSydhH1hescRad21IggrabUniPk.narrowPeak	55674	ChIP H1-hESC Rad21_810	ChIP H1-hESC Rad21	0.64244	1	0
104	demeth_tcga_tertp.bed	652	encode_tfbs	1.33111	1.25724	71	201	415	572	572	396	719	929	11828	ChIP HepG2 SP2_(SC-643)	HepG2		SP2_(SC-643)	None		wgEncodeAwgTfbsHaibHepg2Sp2V0422111UniPk.narrowPeak	2626	ChIP HepG2 SP2_(SC-643)_652	ChIP HepG2 SP2_(SC-643)	0.0466539	0.681718	0.166395
105	demeth_tcga_tertp.bed	1381	sheffield_dnase	6.03274	8.00591	12	73	85	1034	1034	397	19	988	12528	Fibroblast;Muscle;Brain;Primitive;Skin;Stem;Epithelial;Endothelial;Prostate;Mamm						1267.bed	98	Fibroblast;Muscle;Brain;Primitive;Skin;Stem;Epithelial;Endothelial;Prostate;Mamm_1381	Fibroblast;Muscle;Brain;Primitive;Skin;Stem;Epithe	9.27393e-07	3.82645e-05	4.4172
106	demeth_tcga_tertp.bed	431	encode_segmentation	0.744863	1.10638	112	319	446	428	446	398	1284	888	11263	Transcribed Segments	HeLa-S3				ENCODE segmentation	Helas3_T.bed	1472755	Transcribed Segments_431	Transcribed Segments	0.179944	1	0
107	demeth_tcga_tertp.bed	1164	sheffield_dnase	6.4655	10.7195	11	71	71	1057	1057	400	13	989	12534	Stem;Brain;Muscle;Epithelial						102.bed	210	Stem;Brain;Muscle;Epithelial_1164	Stem;Brain;Muscle;Epithelial	3.42371e-07	1.45242e-05	4.83791
108	demeth_tcga_tertp.bed	413	encode_segmentation	1.03579	1.17511	90	261	435	505	505	400	974	910	11573	CTCF Segments	GM12878				ENCODE segmentation	Gm12878_CTCF.bed	59190	CTCF Segments_413	CTCF Segments	0.0920896	1	0
109	demeth_tcga_tertp.bed	2958	sheffield_dnase	7.04744	22.753	9	65	40	1097	1097	401	5	991	12542	Brain						951.bed	853	Brain_2958	Brain	8.96524e-08	4.15435e-06	5.3815
110	demeth_tcga_tertp.bed	2576	sheffield_dnase	5.03792	3.87868	18	82	188	933	933	401	59	982	12488	Epithelial;Fibroblast;Muscle;Brain;Hematopoietic;Primitive;Skin;Stem;Endothelial						47.bed	162	Epithelial;Fibroblast;Muscle;Brain;Hematopoietic;Primitive;Skin;Stem;Endothelial_2576	Epithelial;Fibroblast;Muscle;Brain;Hematopoietic;P	9.16384e-06	0.000336603	3.47288
111	demeth_tcga_tertp.bed	2394	sheffield_dnase	5.00572	4.93337	14	83	142	988	988	404	36	986	12511	Fibroblast;Brain;Primitive;Hematopoietic;Stem;Epithelial;Muscle;Colon;Liver;Endo						252.bed	96	Fibroblast;Brain;Primitive;Hematopoietic;Stem;Epithelial;Muscle;Colon;Liver;Endo_2394	Fibroblast;Brain;Primitive;Hematopoietic;Stem;Epit	9.86926e-06	0.000358147	3.44594
112	demeth_tcga_tertp.bed	2646	sheffield_dnase	1.80884	1.43455	48	171	379	671	671	407	426	952	12121	Weak stem plus others						559.bed	1181	Weak stem plus others_2646	Weak stem plus others	0.0155296	0.273538	0.562982
113	demeth_tcga_tertp.bed	2638	sheffield_dnase	5.14413	6.96437	11	81	95	1057	1057	411	20	989	12527	Epithelial;Brain;Stem;Fibroblast;Colon;Liver;Muscle;Prostate;Mammary						551.bed	123	Epithelial;Brain;Stem;Fibroblast;Colon;Liver;Muscle;Prostate;Mammary_2638	Epithelial;Brain;Stem;Fibroblast;Colon;Liver;Muscl	7.17582e-06	0.000266834	3.57376
114	demeth_tcga_tertp.bed	2853	sheffield_dnase	4.09513	2.87234	21	98	238	902	902	413	93	979	12454	Liver;Brain						822.bed	471	Liver;Brain_2853	Liver;Brain	8.0328e-05	0.00246886	2.6075
115	demeth_tcga_tertp.bed	1211	sheffield_dnase	4.13633	3.22045	18	97	212	933	933	414	71	982	12476	Brain;Primitive;Hematopoietic;Stem;Muscle;Fibroblast;Colon;Epithelial;Liver;Endo						1073.bed	158	Brain;Primitive;Hematopoietic;Stem;Muscle;Fibroblast;Colon;Epithelial;Liver;Endo_1211	Brain;Primitive;Hematopoietic;Stem;Muscle;Fibrobla	7.30585e-05	0.00226858	2.64425
116	demeth_tcga_tertp.bed	1418	sheffield_dnase	4.95987	5.84717	12	84	127	1034	1034	415	26	988	12521	Brain;Stem;Colon;Fibroblast;Epithelial;Muscle;Mammary;Liver						1318.bed	511	Brain;Stem;Colon;Fibroblast;Epithelial;Muscle;Mammary;Liver_1418	Brain;Stem;Colon;Fibroblast;Epithelial;Muscle;Mamm	1.09682e-05	0.000390893	3.40794
117	demeth_tcga_tertp.bed	1569	sheffield_dnase	4.5195	4.70754	13	91	148	1005	1005	415	35	987	12512	Ostoblast and Fibroblasts						1474.bed	238	Ostoblast and Fibroblasts_1569	Ostoblast and Fibroblasts	3.02346e-05	0.000989854	3.00443
118	demeth_tcga_tertp.bed	2799	sheffield_dnase	4.5195	4.70754	13	91	148	1005	1005	415	35	987	12512	Brain						756.bed	17285	Brain_2799	Brain	3.02346e-05	0.000989854	3.00443
119	demeth_tcga_tertp.bed	2723	sheffield_dnase	4.41565	4.57646	13	94	153	1005	1005	417	36	987	12511	sheffield_dnase						655.bed	15140	sheffield_dnase_2723	sheffield_dnase	3.84015e-05	0.00123048	2.90992
120	demeth_tcga_tertp.bed	1666	sheffield_dnase	6.7971		6	66	1	1186	1186	418	0	994	12547	Stem;Brain						158.bed	202	Stem;Brain_1666	Stem;Brain	1.5955e-07	7.28126e-06	5.13779
121	demeth_tcga_tertp.bed	592	encode_tfbs	0.0242798	0.885824	230	620	505	154	620	426	3164	770	9383	ChIP H1-hESC CTCF_(SC-5916)	H1-hESC		CTCF_(SC-5916)	None		wgEncodeAwgTfbsHaibH1hescCtcfsc5916V0416102UniPk.narrowPeak	54111	ChIP H1-hESC CTCF_(SC-5916)_592	ChIP H1-hESC CTCF_(SC-5916)	0.945628	1	0
122	demeth_tcga_tertp.bed	450	encode_segmentation	2.4125	1.80693	29	140	332	810	810	427	204	971	12343	Promoter Flank Segments	K562				ENCODE segmentation	K562_PF.bed	8224	Promoter Flank Segments_450	Promoter Flank Segments	0.00386814	0.0832203	1.07977
123	demeth_tcga_tertp.bed	2486	sheffield_dnase	4.86921	14.7259	7	86	45	1154	1154	428	6	993	12541	Stem plus others						37.bed	185	Stem plus others_2486	Stem plus others	1.35143e-05	0.000473314	3.32485
124	demeth_tcga_tertp.bed	2876	sheffield_dnase	3.32194	2.47052	21	113	269	902	902	428	108	979	12439	Stem plus others						86.bed	290	Stem plus others_2876	Stem plus others	0.000476502	0.0127011	1.89616
125	demeth_tcga_tertp.bed	1298	sheffield_dnase	2.87086	2.11784	24	124	300	860	860	428	144	976	12403	Brain;Primitive;Hematopoietic;Stem;Liver;Epithelial;Endothelial;Prostate;Muscle;						1174.bed	296	Brain;Primitive;Hematopoietic;Stem;Liver;Epithelial;Endothelial;Prostate;Muscle;_1298	Brain;Primitive;Hematopoietic;Stem;Liver;Epithelia	0.00134629	0.0327017	1.48543
126	demeth_tcga_tertp.bed	1267	sheffield_dnase	4.36191	7.11051	9	95	94	1097	1097	429	16	991	12531	Fibroblast;Muscle;Brain;Primitive;Epithelial;Endothelial;Cervix;Liver;Stem;Prost						1142.bed	178	Fibroblast;Muscle;Brain;Primitive;Epithelial;Endothelial;Cervix;Liver;Stem;Prost_1267	Fibroblast;Muscle;Brain;Primitive;Epithelial;Endot	4.34603e-05	0.00137792	2.86078
127	demeth_tcga_tertp.bed	2721	sheffield_dnase	4.20663	6.6918	9	96	98	1097	1097	430	17	991	12530	Stem;Brain						652.bed	151	Stem;Brain_2721	Stem;Brain	6.21392e-05	0.00194962	2.71005
128	demeth_tcga_tertp.bed	2978	sheffield_dnase	3.68595	3.74197	13	101	190	1005	1005	432	44	987	12503	Liver;Muscle;Bone;Fibroblast						976.bed	400	Liver;Muscle;Bone;Fibroblast_2978	Liver;Muscle;Bone;Fibroblast	0.000206085	0.00614583	2.21142
129	demeth_tcga_tertp.bed	208	cistrome_epigenome	1.90138	1.58157	33	166	355	775	775	432	265	967	12282	cistrome_epigenome VCaP H3K27me3	VCaP	prostate	H3K27me3	EtOH(16hr)		Human_VCaP_H3K27me3_EtOH-16hr_Chinnaiyan.bed	5702	cistrome_epigenome VCaP H3K27me3_208	cistrome_epigenome VCaP H3K27me3	0.0125494	0.227704	0.642629
130	demeth_tcga_tertp.bed	2072	sheffield_dnase	5.40635	37.8272	6	79	33	1186	1186	433	2	994	12545	Stem;Brain;Epithelial						2091.bed	204	Stem;Brain;Epithelial_2072	Stem;Brain;Epithelial	3.92325e-06	0.00014958	3.82513
131	demeth_tcga_tertp.bed	2685	sheffield_dnase	2.79948	2.08849	24	125	313	860	860	433	146	976	12401	Liver;Brain						606.bed	2873	Liver;Brain_2685	Liver;Brain	0.00158678	0.0382351	1.41754
132	demeth_tcga_tertp.bed	1500	sheffield_dnase	4.95738	25.2169	6	85	34	1186	1186	435	3	994	12544	Brain						1401.bed	3567	Brain_1500	Brain	1.10312e-05	0.000390893	3.40794
133	demeth_tcga_tertp.bed	2218	sheffield_dnase	1.13809	1.2705	49	223	414	668	668	435	489	951	12058	Prostate Cancer						2279.bed	9540	Prostate Cancer_2218	Prostate Cancer	0.0727627	0.88229	0.0543887
134	demeth_tcga_tertp.bed	1824	sheffield_dnase	3.04762	2.46025	19	116	270	922	922	436	98	981	12449	Weak						1758.bed	4726	Weak_1824	Weak	0.000896153	0.0232691	1.63322
135	demeth_tcga_tertp.bed	2837	sheffield_dnase	2.32778	1.84424	26	141	330	838	838	436	179	974	12368	Brain						807.bed	1771	Brain_2837	Brain	0.0047013	0.100377	0.998367
136	demeth_tcga_tertp.bed	2032	sheffield_dnase	2.91206	2.38645	19	120	278	922	922	440	101	981	12446	sheffield_dnase						2037.bed	23100	sheffield_dnase_2032	sheffield_dnase	0.00122443	0.0307333	1.51239
137	demeth_tcga_tertp.bed	719	encode_tfbs	0.0088658	0.856672	232	651	518	150	651	440	3271	768	9276	ChIP SK-N-SH_RA Rad21	SK-N-SH_RA		Rad21	None		wgEncodeAwgTfbsHaibSknshraRad21V0416102UniPk.narrowPeak	62275	ChIP SK-N-SH_RA Rad21_719	ChIP SK-N-SH_RA Rad21	0.979793	1	0
138	demeth_tcga_tertp.bed	1219	sheffield_dnase	2.4351	1.9405	24	139	325	860	860	441	157	976	12390	Weak						1080.bed	1527	Weak_1219	Weak	0.00367196	0.0795679	1.09926
139	demeth_tcga_tertp.bed	1250	sheffield_dnase	3.66435	6.31445	8	103	99	1124	1124	442	16	992	12531	Stem;Epithelial;Brain;Fibroblast;Muscle;Colon;Liver;Hematopoietic						1116.bed	122	Stem;Epithelial;Brain;Fibroblast;Muscle;Colon;Liver;Hematopoietic_1250	Stem;Epithelial;Brain;Fibroblast;Muscle;Colon;Live	0.000216597	0.00633388	2.19833
140	demeth_tcga_tertp.bed	266	codex	1.97248	1.676	28	160	348	819	819	442	212	972	12335	codex Embryonic Stem Cell NANOG	Embryonic Stem Cell		NANOG		GSE46130	GSM1124071_NANOG.bed	18537	codex Embryonic Stem Cell NANOG_266	codex Embryonic Stem Cell NANOG	0.0106541	0.200563	0.697748
141	demeth_tcga_tertp.bed	643	encode_tfbs	0.267561	0.993883	122	456	475	395	475	442	1539	878	11008	ChIP HepG2 NRSF	HepG2		NRSF	None		wgEncodeAwgTfbsHaibHepg2NrsfPcr2xUniPk.narrowPeak	6024	ChIP HepG2 NRSF_643	ChIP HepG2 NRSF	0.540056	1	0
142	demeth_tcga_tertp.bed	1063	encode_tfbs	0.00437803	0.839837	236	675	522	141	675	446	3374	764	9173	ChIP H1-hESC CTCF	H1-hESC		CTCF	None		wgEncodeAwgTfbsUtaH1hescCtcfUniPk.narrowPeak	43247	ChIP H1-hESC CTCF_1063	ChIP H1-hESC CTCF	0.98997	1	0
143	demeth_tcga_tertp.bed	463	encode_tfbs	0.000307802	0.812372	461	768	532	37	768	446	6435	539	6112	ChIP H1-hESC RBBP5_(A300-109A)	H1-hESC		RBBP5_(A300-109A)	None		wgEncodeAwgTfbsBroadH1hescRbbp5a300109aUniPk.narrowPeak	16151	ChIP H1-hESC RBBP5_(A300-109A)_463	ChIP H1-hESC RBBP5_(A300-109A)	0.999292	1	0
144	demeth_tcga_tertp.bed	2601	sheffield_dnase	3.54283	5.16894	9	106	137	1097	1097	447	22	991	12525	Stem						5.bed	330	Stem_2601	Stem	0.000286533	0.00814186	2.08928
145	demeth_tcga_tertp.bed	1257	sheffield_dnase	2.59805	2.16798	20	132	296	912	912	447	117	980	12430	Primitive;Hematopoietic;Stem;Liver;Endothelial;Prostate;Bone;Brain						1125.bed	399	Primitive;Hematopoietic;Stem;Liver;Endothelial;Prostate;Bone;Brain_1257	Primitive;Hematopoietic;Stem;Liver;Endothelial;Pro	0.00252318	0.0575744	1.23977
146	demeth_tcga_tertp.bed	2396	sheffield_dnase	3.57258	7.36131	7	105	89	1154	1154	449	12	993	12535	Stem						254.bed	1944	Stem_2396	Stem	0.000267556	0.00767505	2.11492
147	demeth_tcga_tertp.bed	2037	sheffield_dnase	3.99722	20.9982	5	99	41	1215	1215	452	3	995	12544	Stem						205.bed	5301	Stem_2037	Stem	0.000100641	0.00306193	2.514
148	demeth_tcga_tertp.bed	1971	sheffield_dnase	3.41391	6.79463	7	109	97	1154	1154	453	13	993	12534	Weak HCF						1955.bed	12534	Weak HCF_1971	Weak HCF	0.000385559	0.0106542	1.97248
149	demeth_tcga_tertp.bed	1382	sheffield_dnase	2.90655	2.99116	13	121	234	1005	1005	453	55	987	12492	Epithelial;Fibroblast;Brain;Hematopoietic;Primitive;Stem;Muscle;Colon;Liver;Endo						1268.bed	161	Epithelial;Fibroblast;Brain;Hematopoietic;Primitive;Stem;Muscle;Colon;Liver;Endo_1382	Epithelial;Fibroblast;Brain;Hematopoietic;Primitiv	0.00124008	0.0308688	1.51048
150	demeth_tcga_tertp.bed	1378	sheffield_dnase	2.68559	2.56654	15	130	255	973	973	453	74	985	12473	Stem and SK-N-SH_RA						1264.bed	161	Stem and SK-N-SH_RA_1378	Stem and SK-N-SH_RA	0.00206256	0.0477878	1.32068
151	demeth_tcga_tertp.bed	1203	sheffield_dnase	3.67233	15.748	5	102	44	1215	1215	454	4	995	12543	Brain;Liver						1065.bed	194	Brain;Liver_1203	Brain;Liver	0.000212654	0.00627954	2.20207
152	demeth_tcga_tertp.bed	2000	sheffield_dnase	3.1412	3.66069	11	114	192	1057	1057	454	38	989	12509	Epithelial						1990.bed	7043	Epithelial_2000	Epithelial	0.000722439	0.0190876	1.71925
153	demeth_tcga_tertp.bed	1512	sheffield_dnase	3.03824	3.30025	12	117	210	1034	1034	454	46	988	12501	Epithelial;Fibroblast;Muscle;Brain;Hematopoietic;Primitive;Skin;Stem;Endothelial						1413.bed	119	Epithelial;Fibroblast;Muscle;Brain;Hematopoietic;Primitive;Skin;Stem;Endothelial_1512	Epithelial;Fibroblast;Muscle;Brain;Hematopoietic;P	0.000915704	0.0235735	1.62758
154	demeth_tcga_tertp.bed	2763	sheffield_dnase	2.02098	1.79966	23	158	334	872	872	455	162	977	12385	Weak						709.bed	601	Weak_2763	Weak	0.00952839	0.181642	0.740783
155	demeth_tcga_tertp.bed	1141	encode_tfbs	0.000606375	0.811618	302	749	533	87	749	456	4363	698	8184	ChIP SK-N-SH_RA CTCF	SK-N-SH_RA		CTCF	None		wgEncodeAwgTfbsUwSknshraCtcfUniPk.narrowPeak	46232	ChIP SK-N-SH_RA CTCF_1141	ChIP SK-N-SH_RA CTCF	0.998605	1	0
156	demeth_tcga_tertp.bed	1171	sheffield_dnase	3.01879	4.21066	9	118	162	1097	1097	459	27	991	12520	Primitive;Hematopoietic;Liver;Muscle;Bone						1026.bed	403	Primitive;Hematopoietic;Liver;Muscle;Bone_1171	Primitive;Hematopoietic;Liver;Muscle;Bone	0.000957655	0.0244445	1.61182
157	demeth_tcga_tertp.bed	1296	sheffield_dnase	2.54609	2.56744	14	134	254	988	988	459	69	986	12478	Epithelial;Fibroblast;Muscle;Brain;Hematopoietic;Primitive;Stem;Endothelial;Colo						1171.bed	170	Epithelial;Fibroblast;Muscle;Brain;Hematopoietic;Primitive;Stem;Endothelial;Colo_1296	Epithelial;Fibroblast;Muscle;Brain;Hematopoietic;P	0.0028439	0.063924	1.19434
158	demeth_tcga_tertp.bed	460	encode_tfbs	0.00168999	0.8196	239	712	529	137	712	459	3476	761	9071	ChIP H1-hESC CTCF	H1-hESC		CTCF	None		wgEncodeAwgTfbsBroadH1hescCtcfUniPk.narrowPeak	66551	ChIP H1-hESC CTCF_460	ChIP H1-hESC CTCF	0.996116	1	0
159	demeth_tcga_tertp.bed	1291	sheffield_dnase	2.56146	2.69565	13	133	249	1005	1005	462	61	987	12486	Epithelial;Brain;Primitive;Hematopoietic;Stem;Fibroblast;Colon;Liver;Endothelial						1166.bed	169	Epithelial;Brain;Primitive;Hematopoietic;Stem;Fibroblast;Colon;Liver;Endothelial_1291	Epithelial;Brain;Primitive;Hematopoietic;Stem;Fibr	0.00274497	0.0621642	1.20646
160	demeth_tcga_tertp.bed	1324	sheffield_dnase	2.50843	2.65199	13	135	250	1005	1005	463	62	987	12485	sheffield_dnase						1208.bed	4604	sheffield_dnase_1324	sheffield_dnase	0.0031015	0.069198	1.15991
161	demeth_tcga_tertp.bed	1149	sheffield_dnase	2.93601	4.59036	8	119	152	1124	1124	465	22	992	12525	Brain						1003.bed	33665	Brain_1149	Brain	0.00115874	0.0293287	1.53271
162	demeth_tcga_tertp.bed	261	codex	1.86615e-05	0.754382	690	826	561	11	826	466	9371	310	3176	Day 5 of in vitro differentiation with FGF2; BMP4 and B27	Endoderm		FOXA2		GSE46130	GSM1124064_FOXA2.bed	31741	Day 5 of in vitro differentiation with FGF2; BMP4 and B27_261	Day 5 of in vitro differentiation with FGF2; BMP4	0.999957	1	0
163	demeth_tcga_tertp.bed	202	cistrome_epigenome	0.132752	0.94257	122	519	488	395	519	467	1612	878	10935	cistrome_epigenome T47D H3K4me1	T47D	breast	H3K4me1	E2(45min-3hr)		Human_T47D_H3K4me1_E2-45min-3hr_Liu.bed	35778	cistrome_epigenome T47D H3K4me1_202	cistrome_epigenome T47D H3K4me1	0.736628	1	0
164	demeth_tcga_tertp.bed	1404	sheffield_dnase	3.4063	25.168	4	110	35	1259	1259	468	2	996	12545	BE2_C, SK-N-SH_RA, and Stem						1302.bed	211	BE2_C, SK-N-SH_RA, and Stem_1404	BE2_C, SK-N-SH_RA, and Stem	0.000392377	0.010744	1.96883
165	demeth_tcga_tertp.bed	2606	sheffield_dnase	2.19192	2.23247	15	152	285	973	973	470	85	985	12462	Primitive;Stem;Liver						505.bed	275	Primitive;Stem;Liver_2606	Primitive;Stem;Liver	0.00642799	0.127376	0.894913
166	demeth_tcga_tertp.bed	1142	encode_tfbs	0.00131723	0.812746	231	728	531	151	728	470	3386	769	9161	ChIP WERI-Rb-1 CTCF	WERI-Rb-1		CTCF	None		wgEncodeAwgTfbsUwWerirb1CtcfUniPk.narrowPeak	50308	ChIP WERI-Rb-1 CTCF_1142	ChIP WERI-Rb-1 CTCF	0.996972	1	0
167	demeth_tcga_tertp.bed	2089	sheffield_dnase	2.8774	5.19444	7	123	136	1154	1154	471	17	993	12530	Stem and Jurkat						2114.bed	11474	Stem and Jurkat_2089	Stem and Jurkat	0.00132616	0.0324748	1.48845
168	demeth_tcga_tertp.bed	1340	sheffield_dnase	1.6515	1.6675	22	177	350	887	887	471	167	978	12380	Primitive;Hematopoietic;Endothelial						1225.bed	1768	Primitive;Hematopoietic;Endothelial_1340	Primitive;Hematopoietic;Endothelial	0.0223102	0.379652	0.420614
169	demeth_tcga_tertp.bed	201	cistrome_epigenome	0.0244053	0.87053	158	619	510	291	619	473	2225	842	10322	cistrome_epigenome T47D H3K4me1	T47D	breast	H3K4me1	DMSO(45min-3hr)		Human_T47D_H3K4me1_DMSO-45min-3hr_Liu.bed	44002	cistrome_epigenome T47D H3K4me1_201	cistrome_epigenome T47D H3K4me1	0.945354	1	0
170	demeth_tcga_tertp.bed	2472	sheffield_dnase	2.26026	2.45315	13	147	271	1005	1005	474	67	987	12480	Repressed in Hematopoietic						348.bed	214	Repressed in Hematopoietic_2472	Repressed in Hematopoietic	0.00549214	0.112533	0.94872
171	demeth_tcga_tertp.bed	265	codex	1.26865	1.44871	26	214	373	838	838	475	227	974	12320	codex Embryonic Stem Cell NANOG	Embryonic Stem Cell		NANOG		GSE46130	GSM1124070_NANOG.bed	13465	codex Embryonic Stem Cell NANOG_265	codex Embryonic Stem Cell NANOG	0.0538708	0.758219	0.120205
172	demeth_tcga_tertp.bed	376	codex	1.20254e-05	0.768502	450	833	551	40	833	475	6470	550	6077	K562 erythrocytic leukaemia cells (ATCC CCL-243) were grown according to standar	Embryonic Stem Cell		RBBP5		GSE32509	GSM831038_RBBPS.bed	12525	K562 erythrocytic leukaemia cells (ATCC CCL-243) were grown according to standar_376	K562 erythrocytic leukaemia cells (ATCC CCL-243) w	0.999972	1	0
173	demeth_tcga_tertp.bed	2397	sheffield_dnase	3.39674		3	111	1	1316	1316	476	0	997	12547	Stem;Epithelial						259.bed	202	Stem;Epithelial_2397	Stem;Epithelial	0.000401109	0.0108842	1.96321
174	demeth_tcga_tertp.bed	2264	sheffield_dnase	2.78961	12.5877	4	126	46	1259	1259	477	4	996	12543	Fibroblast;Muscle;Brain;Skin;Epithelial;Cervix;Liver;Endothelial;Prostate;Bone						2333.bed	316	Fibroblast;Muscle;Brain;Skin;Epithelial;Cervix;Liver;Endothelial;Prostate;Bone_2264	Fibroblast;Muscle;Brain;Skin;Epithelial;Cervix;Liv	0.00162327	0.0388039	1.41112
175	demeth_tcga_tertp.bed	2800	sheffield_dnase	1.01596	1.28624	36	266	411	754	754	477	354	964	12193	Primitive;Hematopoietic;Stem;Prostate;Brain						757.bed	1387	Primitive;Hematopoietic;Stem;Prostate;Brain_2800	Primitive;Hematopoietic;Stem;Prostate;Brain	0.0963915	1	0
176	demeth_tcga_tertp.bed	1374	sheffield_dnase	1.27702	1.46373	25	212	372	849	849	478	216	975	12331	Primitive;Liver;Epithelial;Endothelial;Muscle;Stem;Prostate;Bone;Fibroblast;Brai						1260.bed	400	Primitive;Liver;Epithelial;Endothelial;Muscle;Stem;Prostate;Bone;Fibroblast;Brai_1374	Primitive;Liver;Epithelial;Endothelial;Muscle;Stem	0.0528418	0.750753	0.124503
177	demeth_tcga_tertp.bed	823	encode_tfbs	4.78092e-05	0.774553	313	806	547	81	806	478	4647	687	7900	ChIP HEK293-T-REx ZNF263	HEK293-T-REx		ZNF263	None		wgEncodeAwgTfbsSydhHek293tZnf263UcdUniPk.narrowPeak	31453	ChIP HEK293-T-REx ZNF263_823	ChIP HEK293-T-REx ZNF263	0.99989	1	0
178	demeth_tcga_tertp.bed	1247	sheffield_dnase	1.49405	1.59951	22	195	354	887	887	479	174	978	12373	Complex tissue specific						1113.bed	361	Complex tissue specific_1247	Complex tissue specific	0.0320591	0.493173	0.307001
179	demeth_tcga_tertp.bed	622	encode_tfbs	0.408657	1.0418	75	416	466	559	559	480	906	925	11641	ChIP HeLa-S3 NRSF	HeLa-S3		NRSF	None		wgEncodeAwgTfbsHaibHelas3NrsfPcr1xUniPk.narrowPeak	10247	ChIP HeLa-S3 NRSF_622	ChIP HeLa-S3 NRSF	0.39025	1	0
180	demeth_tcga_tertp.bed	2817	sheffield_dnase	2.72734	5.81799	6	129	129	1186	1186	481	13	994	12534	Liver						776.bed	491	Liver_2817	Liver	0.00187353	0.0437447	1.35907
181	demeth_tcga_tertp.bed	2435	sheffield_dnase	2.45771	6.29857	5	137	100	1215	1215	484	10	995	12537	Stem						304.bed	6086	Stem_2435	Stem	0.00348567	0.0766338	1.11558
182	demeth_tcga_tertp.bed	417	encode_segmentation	0.224414	0.977345	90	475	479	505	505	486	1153	910	11394	Transcribed Segments	GM12878				ENCODE segmentation	Gm12878_T.bed	621374	Transcribed Segments_417	Transcribed Segments	0.596467	1	0
183	demeth_tcga_tertp.bed	2018	sheffield_dnase	2.25411	2.87012	10	148	239	1073	1073	487	44	990	12503	Weak Ubiquitous						2022.bed	470	Weak Ubiquitous_2018	Weak Ubiquitous	0.00557048	0.112606	0.948439
184	demeth_tcga_tertp.bed	3006	ucsc_features	2.25411	2.87012	10	148	239	1073	1073	487	44	990	12503	UCSC Microsatellites						microsat.bed	41572	UCSC Microsatellites_3006	UCSC Microsatellites	0.00557048	0.112606	0.948439
185	demeth_tcga_tertp.bed	377	codex	4.50419e-06	0.75494	399	851	559	50	851	487	5871	601	6676	K562 erythrocytic leukaemia cells (ATCC CCL-243) were grown according to standar	Embryonic Stem Cell		SAP30		GSE32509	GSM831040_SAP30.bed	16520	K562 erythrocytic leukaemia cells (ATCC CCL-243) were grown according to standar_377	K562 erythrocytic leukaemia cells (ATCC CCL-243) w	0.99999	1	0
186	demeth_tcga_tertp.bed	195	cistrome_epigenome	0.412342	1.04599	66	414	458	593	593	488	794	934	11753	cistrome_epigenome NB4 cells H3K27me3	NB4 cells	hematopoietic stem cell	H3K27me3	ATRA(24hr)		Human_NB4-cells_H3K27me3_ATRA-24hr_Stunnenberg.bed	43206	cistrome_epigenome NB4 cells H3K27me3_195	cistrome_epigenome NB4 cells H3K27me3	0.386953	1	0
187	demeth_tcga_tertp.bed	606	encode_tfbs	0.000417132	0.788865	222	760	540	164	760	488	3333	778	9214	ChIP H1-hESC Sin3Ak-20	H1-hESC		Sin3Ak-20	None		wgEncodeAwgTfbsHaibH1hescSin3ak20Pcr1xUniPk.narrowPeak	8977	ChIP H1-hESC Sin3Ak-20_606	ChIP H1-hESC Sin3Ak-20	0.99904	1	0
188	demeth_tcga_tertp.bed	2039	sheffield_dnase	2.19591	2.80578	10	150	244	1073	1073	489	45	990	12502	Fibrobl specific						2052.bed	25640	Fibrobl specific_2039	Fibrobl specific	0.00636925	0.127376	0.894913
189	demeth_tcga_tertp.bed	427	encode_segmentation	0.413804	1.04726	64	413	456	601	601	490	769	936	11778	CTCF Segments	HeLa-S3				ENCODE segmentation	Helas3_CTCF.bed	78385	CTCF Segments_427	CTCF Segments	0.385652	1	0
190	demeth_tcga_tertp.bed	428	encode_segmentation	0.190581	0.963462	91	493	483	499	499	492	1181	909	11366	Enhancers Segments	HeLa-S3				ENCODE segmentation	Helas3_E.bed	41844	Enhancers Segments_428	Enhancers Segments	0.644791	1	0
191	demeth_tcga_tertp.bed	1150	sheffield_dnase	2.32189	5.72515	5	142	131	1215	1215	496	11	995	12536	Brain						1004.bed	3659	Brain_1150	Brain	0.00476557	0.100377	0.998367
192	demeth_tcga_tertp.bed	2372	sheffield_dnase	2.32189	5.72515	5	142	131	1215	1215	496	11	995	12536	Ewing sarcoma						2474.bed	42618	Ewing sarcoma_2372	Ewing sarcoma	0.00476557	0.100377	0.998367
193	demeth_tcga_tertp.bed	172	cistrome_epigenome	2.11384	2.91235	9	156	236	1097	1097	496	39	991	12508	cistrome_epigenome LnCaP H3K9me3	LnCaP	prostate	H3K9me3	R1881(16hr)		Human_LnCaP_H3K9me3_R1881-16hr_Chinnaiyan.bed	4675	cistrome_epigenome LnCaP H3K9me3_172	cistrome_epigenome LnCaP H3K9me3	0.0076942	0.148557	0.828106
194	demeth_tcga_tertp.bed	419	encode_segmentation	1.72671	2.05243	13	175	315	1005	1005	498	80	987	12467	Weak Enhancer Segments	GM12878				ENCODE segmentation	Gm12878_WE.bed	48813	Weak Enhancer Segments_419	Weak Enhancer Segments	0.0187623	0.322926	0.490897
195	demeth_tcga_tertp.bed	436	encode_segmentation	1.02008	1.34296	27	265	402	827	827	498	254	973	12293	Promoter Flank Segments	Hepg2				ENCODE segmentation	Hepg2_PF.bed	30648	Promoter Flank Segments_436	Promoter Flank Segments	0.0954821	1	0
196	demeth_tcga_tertp.bed	593	encode_tfbs	0.000128543	0.770174	225	783	549	161	783	498	3435	775	9112	ChIP H1-hESC Egr-1	H1-hESC		Egr-1	None		wgEncodeAwgTfbsHaibH1hescEgr1V0416102UniPk.narrowPeak	8743	ChIP H1-hESC Egr-1_593	ChIP H1-hESC Egr-1	0.999704	1	0
197	demeth_tcga_tertp.bed	1304	sheffield_dnase	2.44597	18.8561	3	138	42	1316	1316	499	2	997	12545	Brain						1184.bed	16108	Brain_1304	Brain	0.00358123	0.0781642	1.10699
198	demeth_tcga_tertp.bed	2187	sheffield_dnase	1.49839	1.7577	16	194	340	962	962	499	115	984	12432	Stem;Mammary;Brain						2240.bed	377	Stem;Mammary;Brain_2187	Stem;Mammary;Brain	0.0317399	0.492786	0.307341
199	demeth_tcga_tertp.bed	459	encode_tfbs	0.00187465	0.802513	172	708	536	252	708	499	2580	828	9967	ChIP H1-hESC CHD1_(A301-218A)	H1-hESC		CHD1_(A301-218A)	None		wgEncodeAwgTfbsBroadH1hescChd1a301218aUniPk.narrowPeak	7247	ChIP H1-hESC CHD1_(A301-218A)_459	ChIP H1-hESC CHD1_(A301-218A)	0.995693	1	0
[truncated: 2,812 more rows]

## Sheet: LOLA_TERTp_roadmap
Supplementary Table S7c: TERTp methylation LOLA roadmap output
Region enrichment analysis with ENCODE Roadmap Epigenomics sets for TERTp-demethylated CGIs
[truncated: 1,111 more rows]
